# Supplementary material
Source: PubMed Central journal article supplement (PMC8373233)
Supplement: iai.00108-21-s0001.pdf [file iai.00108-21-s0001.pdf]

**Supplementary table 1. The list of Strains, Plasmids and Primers**

| Construct Plasmid                   | Relevant genotype                                                                                                   | Ori   | Source of Reference |
|-------------------------------------|---------------------------------------------------------------------------------------------------------------------|-------|---------------------|
| pBOMB4-Tet::L2                      | <i>bla</i> P <sub>tet</sub> :: <i>mCherry</i> P <sub>Nmen</sub> :: <i>gfp</i>                                       | pUC19 | 1                   |
| pBOMBL::L2                          | <i>bla</i> P <sub>tet</sub> :: <i>mCherry</i> (weakened RBS) P <sub>Nmen</sub> :: <i>gfp</i>                        | pUC19 | This study          |
| pBOMBL-Sa_dCas9vaa::L2              | <i>bla</i> P <sub>tet</sub> ::Sa_dCas9_VAA P <sub>Nmen</sub> :: <i>gfp</i>                                          | pUC19 | This study          |
| pBOMBLCRia::L2 (incA IGR)           | <i>bla</i> P <sub>tet</sub> ::Sa_dCas9_VAA P <sub>dnaKmut</sub> ::Sa_gRNA P <sub>Nmen</sub> :: <i>gfp</i>           | pUC19 | This study          |
| pBOMBLCRia-incA_FLAG::L2 (incA IGR) | <i>bla</i> P <sub>tet</sub> ::Sa_dCas9_VAA-incA_FLAG P <sub>dnaKmut</sub> ::Sa_gRNA P <sub>Nmen</sub> :: <i>gfp</i> | pUC19 | This study          |
| pBOMBL-As_dCas12vaa::L2             | <i>bla</i> P <sub>tet</sub> ::As_dCas12_VAA P <sub>Nmen</sub> :: <i>gfp</i>                                         | pUC19 | This study          |
| pBOMBL12CRia::L2 (incA IGR)         | <i>bla</i> P <sub>tet</sub> ::As_dCas12_VAA P <sub>dnaKmut</sub> ::As_crRNA P <sub>Nmen</sub> :: <i>gfp</i>         | pUC19 | This study          |

| Strain           | Relevant genotype                                                                                                                                                                                             | Source of Reference |
|------------------|---------------------------------------------------------------------------------------------------------------------------------------------------------------------------------------------------------------|---------------------|
| <i>dam-/dcm-</i> | <i>ara-14 leuB6 fhuA31 lacY1 tsx78 glnV44 galK2 galT22 mcrA dcm-6 hisG4 rfbD1 R(zgb210::Tn10) Tet<sup>S</sup> endA1 rpsL136 (Str<sup>R</sup>) dam13::Tn9 (Cam<sup>R</sup>) xylA-5 mtl-1 thi-1 mcrB1 hsdR2</i> | New England Biolabs |
| NEB10β           | <i>araD139 Δ(ara-leu)7697 fhuA lacX74 galK (φ80 Δ(lacZ)M15) mcrA galU recA1 endA1 nupG rpsL (Str<sup>R</sup>) Δ(mrr-hsdRMS-mcrBC)</i>                                                                         | New England Biolabs |

| Primer name              | Sequence                                              | Features                                    | Usage                                                       |
|--------------------------|-------------------------------------------------------|---------------------------------------------|-------------------------------------------------------------|
| Ptet+tetR/(pBOMB)/5' LIC | ttaattatatcacggatccgacgtCTTAA<br>GACCCACTTTCACATTTAAG | lower case for plasmid overlap construction | To insert weakened RBS in <i>AatII/PstI</i> -digested pBOMB |
| Ptet+tetR/(pBOMB)/3' LIC | tagtactttcctgtgtgaAGATCTTTTGAA<br>TTCTTTTCTCTATC      | lower case for plasmid overlap construction | To insert weakened RBS in <i>AatII/PstI</i> -digested pBOMB |
| mCherry/(pBOMB)/3' LIC   | tttgaatggtcgaccggtacctgcaGTTAT<br>TTGTACAGCTCATCCATGC | lower case for plasmid overlap construction | To insert weakened RBS in <i>AatII/PstI</i> -digested pBOMB |
| mCherry/(pBOMB L)/5' LIC | attcaaaagatcttcacacaggacatctgC<br>GGCCGCATGGTCTCTAAG  | lower case for plasmid overlap construction | To insert weakened RBS in <i>AatII/PstI</i> -               |

|                           |                                                                          |                                                                           |                                                                        |
|---------------------------|--------------------------------------------------------------------------|---------------------------------------------------------------------------|------------------------------------------------------------------------|
|                           |                                                                          |                                                                           | digested pBOMB                                                         |
| Sa_dCas9/(pBOMB L)/5' LIC | aaagatcttcacacaggacatctgcATGAA GCGGAACTACATCCTG                          | lower case for plasmid overlap construction                               | To insert Sa_dCas9vaa into <i>EagI/KpnI</i> -digested pBOMBL           |
| Sa_dCas9vaa/(pOMB)/3' LIC | acatatttgaatggtcgaccggtacTTATG CTGCTACGCCCTTTTGG                         | lower case for plasmid overlap construction, adds VAA to 3' end of dCas9  | To insert Sa_dCas9vaa into <i>EagI/KpnI</i> -digested pBOMBL           |
| ddAsCpf1/(pOMB L)/5' LIC  | aaagatcttcacacaggacatctgcATGAC ACAGTTCGAGGGCTTTAC                        | lower case for plasmid overlap construction                               | To insert As_dCas12vaa into <i>EagI/KpnI</i> -digested pBOMBL          |
| ddAsCpf1vaa/(pOMB)/3' LIC | acatatttgaatggtcgaccggtacttaag cagctacGTTGCGCAGCTCCTGGATG                | lower case for plasmid overlap construction, adds VAA to 3' end of dCas12 | To insert As_dCas12vaa into <i>EagI/KpnI</i> -digested pBOMBL          |
| Sa_dCas9vaa/(incA)/3' LIC | tcatgcagattctctctcTTATGCTGCTACG CCCTTTTGG                                | lower case for plasmid overlap construction with incA-FLAG                | To insert Sa_dCas9vaa-incA_FLAG into <i>EagI/KpnI</i> -digested pBOMBL |
| incA/(dCas9vaa)/5' LIC    | cgtagcagcataagaggagaatctgcATGA CAACGCCTACTCTAATC                         | lower case for plasmid overlap construction with Sa_dCas9vaa              | To insert Sa_dCas9vaa-incA_FLAG into <i>EagI/KpnI</i> -digested pBOMBL |
| incA_FLAG/(pOMB)/3' LIC   | acatatttgaatggtcgaccggtacttact tatcgtcgtcatccttgtagtcGGAGCTTT TTGTAGAGGG | lower case for plasmid overlap construction, adds FLAG to incA sequence   | To insert Sa_dCas9vaa-incA_FLAG into <i>EagI/KpnI</i> -digested pBOMBL |
| ct119 incA F              | TCTGATCGCTCCACAAATCAC                                                    | qPCR primer                                                               | for RT-qPCR of <i>incA</i>                                             |
| ct119 incA R              | CTTCTCTTTGCAGATCCTGGTATA                                                 | qPCR primer                                                               | for RT-qPCR of <i>incA</i>                                             |
| ct706 clpP2 F             | GTTAGCGATTACGACACCATTC                                                   | qPCR primer                                                               | for RT-qPCR of <i>clpP2</i>                                            |

|                |                         |             |                             |
|----------------|-------------------------|-------------|-----------------------------|
| ct706 clpP2 R  | CCCTTTGTCCCTGCAGATAATA  | qPCR primer | for RT-qPCR of <i>clpP2</i> |
| ct446 euo F    | CGAAGACTACTCGTTGGGAAATA | qPCR primer | for RT-qPCR of <i>euo</i>   |
| ct446 euo R    | AACAGAAGCTCTCCTTGATAAGT | qPCR primer | for RT-qPCR of <i>euo</i>   |
| ct443 omcB F   | CGGTAGGATCTCCCTATCCTATT | qPCR primer | for RT-qPCR of <i>omcB</i>  |
| ct443 omcB R   | CGAACTCTGCTTCACATGGTA   | qPCR primer | for RT-qPCR of <i>omcB</i>  |
| ct110 groEL1 F | CGGCCGTCCTCTTCTTATTATAG | qPCR primer | for qPCR of <i>groEL1</i>   |
| ct110 groEL1 R | GGAGCTTTAACTGCGCAAAC    | qPCR primer | for qPCR of <i>groEL1</i>   |

| gBlock name                              | Sequence                                                                                                                                                                                                                                                                                                                                                                       | Features                                                                                                                                                                                                                    | Usage                                                                                               |
|------------------------------------------|--------------------------------------------------------------------------------------------------------------------------------------------------------------------------------------------------------------------------------------------------------------------------------------------------------------------------------------------------------------------------------|-----------------------------------------------------------------------------------------------------------------------------------------------------------------------------------------------------------------------------|-----------------------------------------------------------------------------------------------------|
| incA_IGR-targeting gRNA gBlock cassette  | tgtgaaagtgggtcttaagacgtcggtactgcatgtgacgcac<br>gtagatcatgca <i>TTCACCGGTGGAGACGGTTT</i><br><i>TCTTATAATGACACCAATTTTATCATA</i><br><b>TAAAGCCCGTTTTAGTACTCTGGAAA</b><br><u>CAGAACTACTAAAACAAGCAAAAT</u><br><u>GCCGTGTTTATCTCGTCAACTTGTTGG</u><br><u>CGAGATTTTTCAAATAAAACGAAAGG</u><br>CTCAGTCGAAAGACTGGGCCTTTCGT<br>TTTATcaacagcgggtactgaatctgagctagtgcgat<br>ataaataaattatattca | Lower case for plasmid overlap and spacer, <i>italicized</i> for P <sub>dnaKmut</sub> promoter sequence, <b>bold</b> for incA_IGR targeting sequence, <u>underlined</u> for gRNA scaffold, Upper case for rrnB1 terminator  | Insert into BamHI-digested pBOMBL-Sa_dCas9vaa::L2 plasmid with or without incA_FLAG complementation |
| incA_IGR-targeting crRNA gBlock cassette | tgtgaaagtgggtcttaagacgtcggtactgcatgtgacgcac<br>gtagatcatgca <i>TTCACCGGTGGAGACGGTTT</i><br><i>TCTTATAATGACACCTAATTTCTACTCTT</i><br><u>GTAGATTCATTTAAAGTTCTCTGAAA</u><br>CAAATAAAACGAAAGGCTCAGTCGAA<br>AGACTGGGCCTTTCGTTTTATcaacagcgg<br>tctactgaatctgagctagtgatataaataaattatattca                                                                                              | Lower case for plasmid overlap and spacer, <i>italicized</i> for P <sub>dnaKmut</sub> promoter sequence, <u>underlined</u> for crRNA scaffold, <b>bold</b> for incA_IGR targeting sequence, Upper case for rrnB1 terminator | Insert into BamHI-digested pBOMBL-As_dCas12vaa::L2 plasmid                                          |

- 1 Bauler, L. D. & Hackstadt, T. Expression and targeting of secreted proteins from Chlamydia trachomatis. *J Bacteriol* **196**, 1325-1334, doi:10.1128/JB.01290-13 (2014).
