# Supplementary material
Source: PubMed Central journal article supplement (PMC8373233)
Supplement: iai.00108-21-s0002.pdf [file iai.00108-21-s0002.pdf]

*C. trachomatis* L2/434/Bu dCas9 site (RRRT or complement)

ATGACAAGGCTTCCATTACTAAAACGACCTCGCAGAAACCGAAAAAGTGCAGCCGTTTCGATCTATA**ATTC**  
AAGAA**ACCCAACTC**TGTTCTAGTGACTTGATCTGGCCCATCTTCTTAAAGATGGCTCT**GGAATTC**GAGA  
AGAAATAGAG**GAGT**ATGCCT**GAGT**ATACAGATG**GAGT**TTAGACATGGTCTCTAAA**GAGT**TAGAGAGACTT  
TGTACGATAG**GGAT**TGAAAGCAGTT**ATCC**TCTTCTGTAATTGATGCTAATAAAAAAGAACAATTT**GGAT**  
**CC**TATGCGTCCC**ATCC**TTACAACATTTGTTTGTAAAG**GGATTC**AAAGCGATAAAAAATCTTTTCCA**GAAT**T  
ATGTGTCATCAGTGACATAGCTTTAG**ATCC**TTTTACAACCAGTGGTCACGATG**GGAT**TTTTCATAATAAC  
TACGTTATCAATGATGAAAGTGTCCGTGTATATGG**GGT**ATCGCTGTCATGCATGCGGAAATGGGAGCAG  
ATATTGTTGCTCCTAGCGATATGAT**GGAT**GGGA**GAGT**GAAGCAT**ATTC**GAGAGCAGAT**GGAT**CAGATGGG  
**GT**TTGTCAACAC**GGTATTC**TCTCGTACAGTGCAAAATATGCATCTGCATTGTATGGCCATTT**CGGGAT**  
GCTCTTCTTACATCTTCAGTCTGGAGATAAGCGTACATATCAAA**GGATCC**TGCCAATGTTCAAGAAG  
CGTTGCTA**GAGT**GTCAGTTAGATGAAGAAGAAGCGCTGATATGGTGATGATAAA**ACCC**CGAGGTTTTTA  
TCTAGATGTAATCGTTAAAGCGAGAGAAAAC**ACCC**ATCTTCCGGTGGTAGCCTATCAAGTCAGCGGG**GAA**  
**T**TTTTCTATGATTATGGCTGCTTGCCTTCAT**GGGT**GGTTAAACAAAGAAAGTGAATAAAA**GAAT**CTTTAT  
TAGCGATTAAGAGAGCTGGTGCAACAGCTATAATTAGTTACGCAACACCAT**GGGT**TTT**AGAAT**GGCTAGC  
TAAAGATGCTCTTCCCTTTGAGAGAAGTGTCTTTGAAGA**ACT**TTGTGCAGCACCAGATGTTTACGAGG  
AGGTTACCAC**ATTC**TCTTTTGCCTAGCGTAAAAGAG**ATTC**TTT**GACGATAGAGA**ACATCTCGGCTTAGA  
**AGGAT**CTAT**GAAT**GTGGGGAGAGCAAAATCTTCTGGAGCAACTTCTAAGAGCCCTAGGCGACACGCTTCT  
TCAAAGTTTTGTGTTTCCAAAGCTTTAATAATAAGAGCTACAGGAACCG**GGAT**TGCTGAAACACGCTCAT  
AGATTT**CAGCATCAATAATGGG**CCGTTTTTCTCCATGCATGTTGGT**ATCC**AT**ATCC**ATGAAG**ACCC**GTTT  
TCTCTTGA AAAAACCAGATAGATAGGTT**CGTGTGACTGTAAG**TTT**ATTC**CAACCTAAGCGCAAGAACTG  
AAAG**ATTC**ACGAGT**TTTAGGAT**TAGGAAG**GAGT**GTTATGGTATGGTCTCTCATACTAAACAA**GGAT**TTT  
CTTCTTTTTTACATAATCTTCTGTAAGAG**GGAT**CTCCAGAAATAA**GGTA**ATCTCATCGGAAGAGAAAAT  
GTCTTTAGGAAGAAGATCAGAGAACTAGCGCTTTCGCAGTAATGAGATATTTTCTTTGAGAAGGAGGA  
AGAGCTG**ATCC**TGCTAAGGCAACGATTTGTTGTCTTAAACAAAGCCTTTTTAAAAATAGATGCCCTATAG  
ATAACACCTCTTGAAGCTAATAGTAAACACAACATCTCTTTCGTTTC**GAAT**ACGAGCGATGTGAT**GAAT**  
GTGCGTTGAAGGAG**ATCC**TGATGGGAAGGGGCCATCTATTGTGTGTAAGTGGGCTAT**GGAT**ACGAG**ATCC**  
TGGGT**TGGGAGAGT**TAGTCTGTCTGTAGAAATGATATGAGGCTTCAGTCCAAATAGTTTTTGCTATTGCCT  
GA**ACTC**CCACAACAAAATGTAATAACCATCTTCTTTTGAAGAAAAAGACTGAGATGTTTTTCCACAGA  
AGGGGT**GAAAGGGCGATTATCC**GCTAAGTTAATAAAAACATCTCGAGGAGATTGTGTTGGAAGAGCTGGG  
**AT**ATCAAAGGCTTTGTTTGAAGAGCGAAAAGACCTTCTTTTAAAAACTTCTAAAAGATCTTTTT  
**GAGT**CAAAGATTGAAGATCATAAGAAA**ACT**TAGTTGAGAAATACCAGGCTTCTTCTGATGACGATCTC  
TAAAAGAGCAGCTTATTTCTCTAC**GGAT**CTCTACAACCTCTCCATCAACAGGAGAGGTAATAAAC**ACT**  
**C**TGAAAAAGCTTGT**ACTC**AGCCAGGGGAGAACCAGCAGTAACTTGGTCTCCTG**GAGT**AACCTTTACCT  
CTAAAGGAAGGGGAGCGAAAGGCCTCAA**ATCC**ACGGAAACATAGGTG**GGT**CCACCTTACC**CGAAAA**ACC  
**CGATTC**CTTCGGAGCTCCCTTAAAGACAGATCTA**ATCC**CGGAGAAACA**ACT**ATTTTCATATCTCG**GGAT**  
TATAGAAGTTTTTATAAG**GAATCC**AATTTTTTTCTTACTTTTTTCTGAGAGG**GGAT**TTTTGCTTTTT  
TTGGCGTTGGAGATTTGTG**GGATGAGT**GACCAATATCATTGGTACTTCTTTGATAAGCTCTT**CAGTTT**C  
TTTTTTGT**ATTC**ATTGCAAGAGGAAC**GAAT**GTTTTCTAGAGCTCGCC**ACTC**TT**CAGGAGAAA**AGTTATCT  
**GGAT**TATTAGCAA**ACT**TCCATTTGTT**CGC****GAGT****ATTC**CCGCTCTGTTGGA**GAAT**TTCTTGC**GATCTTT**  
TGCTA**ATTC**TT**GGAT**TTTTTCTGTTTTTTCGATCAGCATTTGGTAGTCCAGATCGTTGT**CGTCAGT**  
AAGAGTTGCTCCAAAGGAG**GGT**CGAAGTCTATTTATAAATAGAG**GAAT**TTGTTTTATA**GAAT**CTATA  
ATTTTTGAGCG**GAAT**TATTTTT**CATA**CAAAAATCTCGATGTTTTATTTAATAATAAAATTTTTCTTGT  
TTTTTGATGTAATATTGCTCTTTTTTGT**ATTC**GGCGTATATTTCCGACTAAAAGGGGAGCCATCG  
T**GGAT**TATCTAGAAAAGCTGCAGTCC**TTA**ATAGAAAATC**ATCC**TT**CGGAT**TTTTTTAGTTTGTGGGA**GA**  
**GT**ACTGTTTTAATGATGTCGTTAAGGGGGACGAGCTAGTTGTCTTACTGGAAAAATCAAGGGCTCAACT  
ATAGCCCAGCATTTGGGAAGATTGCTGAAAGTGT**ATTC**CTTTATGGGAACA**ACT**CTCTGAAGGAGAAG  
AGAAAGATAAAGT**ACTC**TCTCTGGTTTTGATGTCCAACAACAACAGTAA**GAAT**CTGCTAGAAATAGC  
TCTTCAACAGGTA AAAAATACGAAG**ACTC**AGCCAATTACAAGGAAGCTTTAC**GAAT**AGTTGGTTTGC**GA**  
GACG**GGAT**CACCTTTCTCATTGCTCGGACGTTTTGCTTTGCTTATGCACCTAAGTGAAGGAACTTTG  
TTTTT**CATCA**AGGTGGTTGGG**GAGT**TGGAGAAATCATGG**GAGT**CTTTTCTTCAACAGAAAGTTCTTGT  
TGAGT**TTGAAGGGT**TCTTACGGCGAAAGATATCTTTTTGAAACAGCTTCCGATGTTAGTTCTTTA  
AGAAAAGATCACTTTTTTAGCAAGAAGGTTGGT**ATCC**AGATGCTTTTGAAGCGTTTGTCTCGCAAGAGC

CTGTAGCAGCCATA GAGTGTCTGTTAAAAGATTTAGG ACCCAA GAATGCTAAAGAGATCCGAAACGAGCT  
GGTGGAGCTTGTGATTCCTGAAGAAGATTGGAGT CGTTGGTGGCAATCTGCTAAGATTTAAAATGAAAAA  
GATGCGC GAATTTTAGCTCCTGCGTCTTCTAAAGATCC TTATGTATTCGATCCGAAA GGATTTTCTTTTG  
TTTCTCAATTACAAGCCTCTTTATCTGGAAGCAATGATGCGAAT AAGAAGATCACTTCTTGTATGCTTT  
TGTAAGAGATTTAGGAAGTGAGCTGAAAGAT GAATCTAATCGACAATCGGTCATCAA GAGTTAAAAGCT  
TTAGATTTGCCCGCTGATTCGCTTTGTTGATCC AAAGAGCGATGTTGTTATCA GAGTTTCTTGGAGAAA  
AAGCTCCG GAGTTA GAGTATGAAAAATATTGCAAACTC TCTGAAGATCAGTTATTCGATATTGTGAATAA  
CATAGAGATTCCTCTTTACAGAA GAGT TTTCTGGCTTTAATCCACTCATGTTCTCCTGTTT GGGTTCCT  
GTGTATACCAA ACTCTTTCTCACAACAAGCACGTCATGCTTCGTGAACAGGCTTTAAGGCTTGAATG  
CAGATAAAGAAGCTCGCGA GAATATTTTAAAAAAGTTTTTGGCTATGATTGAGCAGCCTTTGCTTTATCC  
AGAGCTTTTTGTTGGTTATTTGCTCGTGTGGTTGATGGAGAAGACGGTTTATTTGCA GAGTCTGATAAG  
AAGGAAATCGAGCGGCAAATGCTTGTAGCGCATTTGGAGCTTATGCACAAAGTCGCTACAACGCC TCAA  
AAGATTTAGGGAAAAA ACTCTATTCATTTTTAGTTGGACAACGGTTTTTAGTTATTCGTCAAATCATAGA  
TCAAGCTTCTATA GAGTATCTTAAAGAGT TTTGTTTTATTATCTTCTAAGTGCCCGCAATTTACTCAAGGG  
GATCTGGGAGTTTTAAGAAGTTTGGCAGAAGTTGTGCAGCCAGCTCTAAGAGAGGGACTCTAGAAGAGG  
AAGAAAATATTC TTTGGACTACTTCAGATAGTTTT ACTCGTATGAAAAACAACTACAATCTCTGGTAGG  
GAAAGAGATGGTAGA GAATGCTAAGGAAATAGAAGATGCTAGAGCCTTAGGAGATTTAAGAGAAA ACTCT  
GAATACAAATTTGCTTCAGAGAGACGGGCTAGACTACAGGAAGAAATTCGTGTTTTGTCTGAGGAAATCA  
ATCGAGCAAAAATCTTAACTAAAGATGCTGTTTTACAGATTC TGTGGAGTGGGT TGTAAGGTTGTTCT  
TGAAAGTGACCAAGGAGATAAGGTTTGTACTACTATATT GGGTCCATGGGATGCTAATCCGGATGAAAAG  
ATTTTATCACTAAAACTTAACTGGCCCAAGAAATGTTGGAAAAGCTGTTGGAGAACTGTACTGTTTT  
AAGGCAAGAAGCACAAAGATCAAGGAAATTTCTTCTATATGGGAT TAAACAGAAATGGAGCATAGCGGA  
TCGAACCGCTGACCTCAACAATGCCATTGTTGCGCTCTACCAACTGAGCTAAT ACCCGAGGGAAGAAAC  
TAGGTTATCATGTTTACACGATTTAGGACAACAAGCTGT CATCTTACTGAAAAAAGACAGTAAGCAGC  
AGTGCCTATAGAGAGGTTTTATTGT GAGTCTTTTTGAACAGTTACCTTCTTTCTCC GGATTCATTC  
TTGGTTTAGCGCAGGCTTTCCAAGAGGATCC TCGTAGGAT AAGATTAATTTATTACTAGGTA CTTACGA  
ACGGGAAAAGAAACGCTATGGGGT TTTCTCGAGCGTTAGAAAGGCTCAGTCTGTTTTTTTTGACGATGAG  
AAAGATAAAAATTATCT ACCCATCAAAGGATCGTCTACCTTTTTAGAAGAAATGGCAGCTCTTTGTTTTG  
GAGAAGTGGATGCTAATCGATGGGT TGGTGTGCAGGCAATTGGAGGTACAGGAGCCTTACATTTAGGGGC  
TTCTGTATATGCCAACGCATCTTTAGCGGGT AAGTGTATATTCCTTCTCAAACATGGGGGAACCATTCT  
AGGATTTTTTCTCATCAAGGGT TAGCTTTAGAGTATTATCC TACTATGATCAGGAGACCAAAGAACTGG  
ATTTACAGGGAT TGAAAGCTGTTTTGCGATCTGCTCCTGAGACTTCATTAGTTCTGTTGCATTGTTGCTG  
TCATAATCC TACAGGGAAGATATTCCTCTTTCC GAGTGGCCAGAAATCATTACGATTATTAAGGAGCGG  
GATCTTATTCCTTTCTTTGATATGGCTTATTTAGGTTTTGCTAGTGGATAGAAGAAGATCGTCGTCCTG  
TGCAACTGTGTATAGAAGCTGGGT TACTACTTTTGTAGCAGGAAGCGCTAGTAAAAATTTTTCGTTATA  
TGGTTCCTGTGTA GGATTTTTTGGAGCTATCCATCAAGATAAACA GGATTTAAACCGTATTTTATCC TTT  
TTAGAAGAACAGATTCGTGGG GAGTACTCATCTCCGGCTAGAGAAG GAGTTGCTATCGTGACTTCTATAT  
TAAGCAATCC TTACTTACGGCAA GAATGGGAGCTTGAAT TGAATGGCATTCCGGCAGTCTTTGGAAGAGAT  
TCGTTCGAGT TTTGTGATTGCCATGCGAAATGTAGCGGGGCACTCTTCGATTT CATAGCTTCTCAGAAA  
GGATTTTTGGGTATCCAGGTTTTTCAAAGGAACAAGTGCTGTTCCTTAGAGAAGAGCTTGGTATTTACA  
CAACCGCAGGCGGAAGATTC AATTTAAATGGCATTAC GGATAAAAATATAAATCGTGTTACTCACGGTTT  
TGCTCAGGCTTAT GAATACCC TCGGTCCGTATCATAAACGCGTTCGGTTCATTACGTATCTTTTTGTTGC  
CTTCGGAT TATTGTGAGTTGGAATCTTCTCGAAGTGCTTAC GAGTCTATCCAGGATACATTCGTTCCG  
GTGTGTTCCAAATTTCTTCCATTTCCGCAAGGGT CTGATTC TCAAGCCCTTGTGTAAGAACTCAATGCT  
TTTTATTGAAAGAAAAAATTCGTTTATTGGAAGAGCGTATTC TTTCTATGGAAGAGGCAAAACAGTCTCC  
GCCTTTGTTTTCAGAAATTCATCC TCGTATTTTCAATCTCCCATTATGGGAA GAGTTATCTTTGAGAT  
CCAGCACACTGGGGT AGTTCTTGTGGATTAATATAGGAAAGCGACAGGGCGTTAAAAA GAATTC TCCTG  
TTGTTTGC GGTAAGGTTGTTGTGGGT TGGTGGAT TTTGTTGGTGAAGCGCAGTCTCGTGTACGATTCAT  
CACCGATGT GGGTATCAAACCTTCTGTTATGGCGGTTCTGTTGAAATTC AAACCTTGGGTGTGAAAGAT  
CAGCTACGTACATTAGCTAGGAACGTCGCTAATCTTCCGGCATCTGCTTTTGCAGATAGTGATAAACAGG  
AAGCTTTACATCTCTTGCAGGCTCTAGA GGATTC TTTATCTCTATCAGAACAAAATGATTTTGTCTTTCG  
TGGAAT TGTGTTGTGGTCTGGGGATCC TATTTGGAAACCGGAGGCTTCTATACTTAGCGGTAGCGATTTT  
GGTTTTGTAGATGGGAAAATATCGAAGTTGGAGATGTTCTTGTGACCACAGGAT TGGATGGTGTTTTCC

CTCCAGGACTTCTCGTTGCTACAGTCAATGAAGTCTTCCTAAAAGTGAAGGATCTTGTTCTTTGAAGAT  
AAAAGCACAATCCTTAGCTCCAGATTGTTCTACGGTGGATTTTTTGGTGTACCACCAATGGATTTTAAT  
CCTAATGATCGTCCTGATATTTTTGGTTTTGATTGGGAGTAGTTAGAAGGGTTTAGTTAACGTCCTGGT  
TGCAAAAATCCATTGCCCTTGTCATCCAAGCCTCGGATAAATACGAAGGCCATTTCTACTTGCAATGATG  
AATTAATTTGGTGTAGGAACCTTTTCGCTGCTTTTCTGTACAATCTCTCCTGTCTATCTAACCCTTGACG  
TTGAATATAGAGATGGAGTTGATCTGGGGAATAGCAAGAGGTTTCATCTCCTAAGAAAGAAGTTTTCCAG  
TCGATGATAAAAAATCGACCCTTATGTTCAAAAAATAAGTCGACGATTCCTTGCCACAACTCTCCTTCTT  
CTTGTAGTAAGAAAGTTTCTCTACACGTATGTTATGAGGATGTATATTCCTGAGAGCAAAGGATCCGGA  
AGAAAAGGAAAGAGTCTGTGAAAAGACCGTATAGATTTTTTCTGCAATAATAGACTCGTATCCTTCTAAA  
GGAGTGTTTTTCAATAATGTCTGAGCTTTATTGAAAATTTCTTCAAACAAGCAGCAAATTCCTTGCTA  
ATGATTCAAAAGTTTATGAATCAACGTTCCCGTTAGAGAGCCTCCAGGAAATAAAAGAGAAGGTGACAG  
TTCTTGAATAGGTTCCGAAAAGTGAAGATTCCTACCGTAGAAGAGAAAAGAGTGAATAGTTCCGAGAAGGG  
AGATGTGGAAGAGAAAAGTATGTTTGTGAGGAAGACGTTCTCTATCCGGAGTTAGAGAGCTTTCAGGAG  
GTTGGAAGCTTGATGAAAATAGTTCGGAGATGAGGAAGTCAAGGTTTCTACTAAATGAGGAACGCTATG  
ATGTTTTGTAACATTAGCATAGTTAGCAAGAGCAGAAAGTTTTTTTGTGCTTAGTGAGCGTTTCTCTATA  
GGAGAAAACGGAATAATAAGAATTTTTAGCTCTTGTGCATGCGACATACATTTCTCGCATATGAACAG  
AAGGAGTTTTCTTTTTGCTTTGTTAAGGCAAGAGCAAATACTACATCGTATTCGAGCCCTTTTGAAGA  
GTGAACGGTCGTAATTTTTATCATATTCCTGTCATTAGATTGCGACGAGAAAGAAAGCTCTTCATCATA  
TTCCCTGTAATCAGAATATTGATGAGATGTAAAGAGTTGTGATGGGATTCCTGTAGTTTTATCAAGAT  
ACAAGCATAGCGCTTCTAATTCCTGAAAATGATATCTCCAAGAGGGTTTGAATAATGTTTCTCCTAT  
GGTTTGAATAAAACGTTTTCTCCATCAGCTTATAGAAGGTAGCTAATAGAAGTATGTTGTTAGAGATGT  
CGATTCAGAGTGA AAAACAAAGAAGAAAACGTTTTAAGATGCTGGTGAATCTCCGTAGAGGAAAAGCTGAA  
ATAGCCGGCTCATCAAAATGGCTTGAATCTTTTGTGATTCTGGGTACAGAAGGGCTTCCAATAGTAG  
AATCAGAAGGTAGGGGATTCGTGCGATCAAAAATACGTTTTTCTTTGCAGTAGGCCATGGGATGGTG  
CTGTGAGTGATTAGCTTCAGAGCCTGTGGATAGTCTTGTACTAGAACAGCCATATTTCCAAATGGAATGG  
AATACGCTGATCGAAGATAAGAAGCTGTTTTAGAAATCCATAACGTTTCTTCTTGAATGTCTTCTGAGGA  
GAAGAAATGAATAGGACTGAACCTGAGTAGGAGATCTCCGAGCTCCCTTGAATGTAAAGGGTGATAC  
AGAATGTTTTGTGGAGTCTCTAGAAAACGGTGTGGGAAGAGAAAACAAATGGTTGAGACCTTGATAAGCT  
CTGGGGTGGATCGGTAATTTGTATCTAAAATAAGCTGAGCTTCTTTTGGGAAGGAGTGTTTTTGCTTGCAA  
GTATGTGGGGAGGTGCTGATTTCTCCATTCATAAATAGACTGTTTGGGTCTCCGATAAGAAAAGGGAT  
CCTGAATAGTCTGGAGAAGCAAAGAGTTTAGAAAAGATCTGCCACTGACGTTTGTGAGTGTCTTGAATT  
CATCGATCAAGACTAGCTGAAATGTTTACGTAGTTGTGAGACGACAGTATCGTTGTGATCTAGAAGAGA  
TTCATAAGTAGCTATGCTTTCATCATGGGAATAGGATGTGCGCAGTGAATTTTCAGATGTTGTGCACG  
CTTTAAGTAGCGTATGAAAATAGGTTCTTTTTGGCAAAAAGGATGAGCTAACTGTATCCAACTTTGGA  
AAAAAGGATCTAAAGGAGAAGCTGGAGCACTTAATTTTTCTTATTGCGGTTTTCTCCTGAAACTTCTG  
TACCATTCCTGGGAAAACAGCATATCCAAAAGAAAGGATGGTTTGAATGTTGCACAAAAGCAGGG  
AGTTCCCGCTCGATAGAGAGATCGCTTTGTTAAAACGAAGAGAGAAAGCTTGCATTTCTCGAGAGAGA  
GAGGAGCTAAGTGTGTTAGTAGCAGGAGACCAAGCTTTTAGTTTTTGCAAGGTTATCGATAGAGGCGAGAG  
CGCTAAATTTGGTGTGGAAGTGAATCTTGAAGTAGTCTCTCTATTAGGTGGCGTGTGTTGGGTAGTA  
GCGCGGTGATGATAAGATAAGAAGGCGTATTGTTTGGGAGAGAGAACCCTGTCCCAAAGATTTTTACGTA  
AGTAGTCTAGGATATACTGTTGTATGTTTTGAGGCTCTGAGAAAATGGAAGACGGCTGAATAGGCTGTAT  
CCAAGGGAAGTGTGCTCCAGTGTAACGACAAAATCCATGAATAGTAAAGATGTTTATTCTATAA  
GTGGCCAGGCTATTACGGATCTTCATGTAAAGCTGTTTTACTTTTGTCTGAGGAAGAGATATAGGGAG  
GTAAGGGAGTCCCAGGATGAGAGAGTGTGGGAGAAAAGACTCAATGCTTGTGTTGAGGCTTGTGTTGAAT  
ACGCAGTTTTAATTCATTGGTAGCTGCGTTGGTAAATGTAACCACCAAATGTTCTTTGTCTGTTCGATC  
GAGCCTTCTAATAACGAGCGAAAGAACTTGTCTATGGTGAATGTTTTCCAGTTCTGCGGAAGCTT  
CTAAGAAAATTTCCAGAAACAGAAGCTGTTGGTGA AAAAATATCAAAGAGCTCATATCAGTTTTGTT  
GACTATCCTGATTTATAAAGAGAGAAAGAAGCTGCGAGAGCACGTCATTAGAGAGTCTGAGCAAATTTCT  
TTCTGTATCACGATTATGGAACCACAAAACACTACTTGTAGGGGGTCTTCTCGCTATCTAAAAGTTTT  
TTTATACACTGTGACGCTGAATCAGTTTTTTTTAATGTATTCAGGCTTGAGCAGAAGGAAGAGGAACAG  
CTTGATTTTGTAAAGAGATCATAAGGTTGGATCGCGGGATCAAGTAAGATTCGGAGAGGAAAAGGAGG  
GAGGATAGGCTCAATGTCATGAGGTGTAACGCGGAGGATGGTAGCTTCTTTAGGAAGTAGATGAGAGGCT  
TGTAGTAACGCTAAAGGATAGGTAAGGATTCATAATAAGATTCAGTTCAAAGGCATCTTTAGGGAATCCAT

GAGT TTTCTGAGT TTTCTTAAAGGCTTCTCCC GGAT GCATAGAAAATAGATAT ACCC CTTTTGAACATAC  
GCCAT GAAT CGTCCCTTGAAGAT GAAT ATTTTTTAGGGGAGAGATAG GAGT AGAGGAGGGACTTGTGA  
TCATTAGGAT G GAGTGGGT CGTGAAAAGTTGATCGGAAAATACAACAGAAAAGG GGGTGTAGCAGGAT  
CTTTCTGCAAAGTTTCTAAGCGTTACTTACAGAGT CTTGTACATCGGTGTATAGAG ATTC TGTAAGGC  
TGAAAGATAATTAGTAGT GGGTAGAG GAGT TTTAGAAGAGAGAAGGTGGTTCCAAAAGCTTTAGCATCG  
TGAGGACTAGGAAAGACTTTTTCTGATTTAGAAAATAGTGCTTTG GGATGAAAGGAAAAGCCATGTTGCG  
TGCTTAGGAAAAGTTTAAAGGAT CTTGAAAGCTTTGATTAGATGTTGTAG GGAT AGGTGTGAAGGTAA  
CGTCTTAGTTGTATCAGACTTAAACAG GGATGGGGCCTTGTTTTGTAGCGGGGAGACTTGAGCC ATCCGG  
TAGTAAACCTGGTAAGACTGATGCAACGGTTCAGAAGAAAAGTTTTCTTTAGCATAAAGTTTTCCAGAAA  
GATGTTCTTCTT GAATAGGCACAGC ATCCAACAAAATGTTTCAAAGCAGAGCTCGGTAATGCT GGATTC TT  
GGAT GAAGAGAGATAACTAATATGGAGCTGGTGT TTTGTAGAAAACGATAGTCTGTAGAAAATGTAAGTTA  
TCC TCATCTT CAGTGGAGGAAAATAGAAAATCTTCC T GAATGAGAGAA GGAT CAATAAGAAAAC TGGTAT  
CGAGT GAGT GATCTTTTTTGT TTTGCTCCA GAAT AAAAGTAT ACCC TTTAGGAAT TAAACTGAGACTATT  
TAAAG ACCC TACAAAAGGGCCAGGTTGATTGTACAGTTGGCTATGACCAGGAAT ATGTGAGAGGAAGTCT  
AAGCAAAA ACTC CAATGAAAATGGTTAAAGAGCAAGAAGAGCGCACAAAAGGTTGTAGTGT TTT GGAT AAGG  
AAACTAACAAAGCAT ACTC TTCCGTAGAGAGGAAGAAAATATTTTCTAAAGCAGAAAAGATAAGACGAGA  
GT GCTCTTCGTAGGTT TTTGTCTTTAG ATTC TATGTAAC TGGCTGTGACTTGT TGTAGTGTGTGAAGAAGA  
GGAACGACAAC TTCCCATGTCTCAGCTTCATTAACGCTACCAGTATCATCAATAAAC GGATATTCATCCA  
AAATACGAT GGATGAGT T GAGT AAGAGGAGAGT CTTTTTGTGATAA GGAT TTCCAATAGTGCCTAAGTTT  
AT GGGT AAGGAAGCCATTTTTTGTAGTCTCTAAGGGGAGAGAAGATCAGGAT GAGAAA GGAT ACGAAGT  
AGGTCGTT CAGAGAGC TTTTAGA GAATAGAAAAGGTC ACTACTAACAAGAGCTTGT TTTTTTAGTGTGCGG  
T TTTGT TTTTTCTCAGTTTTTGT TAAATATAAAGGAAGATGAGGTTCAAAGATCC CTTTAAACAAGT TTT  
GTATTTAGAAAAGATTAGAAGAGA GAAT AAAGATTTCTGAGCAGGA ACTCCAGAAT GGAGAAGCTGAGAA  
ACAAGCGAAAATAATTGATGGACTTCTCG GGAT GCGGAAGGAGCTTGTCTTACAAAATAAGTTTGC GG T  
AAT TAGAGAACAGCTTTTGTATCTATAGGTTGTAATGGAAAAACTGTCTTTTACAATGTGTAAAGAAGA  
AAGTTTTTTCGTAG GGT TGAAACAGTCTTTCGTAGGGAACGCTATAATCTAAAAAAAAGTTTTGTAGCGAC  
TGCGATTTGTGAGCAAGGTTGGCTAGTAATGCTAACCG ATCC GTTAATACATATTTCTCCCATGTTTCTT  
GATGTGGTCTCG GGATTC TCGGGGAAAGTGCTGCCATCGCTTTATCAGACAAAAG ATCCCGAAATAGGC  
TGCGCTAGGAGAAAAACAGTAAAAGTGCACAGGGAAATATTTTCTTAAAGCAACAAGAAGGAGGCTACA  
TGTTGGGGAAGTTGT GGATACCC AAAAATATGCAGAGAACAAG GGATATTC CGGAGGAT GATCCAGAATCG  
AAGAAAAAATGGTTCTAATGGAGT ATAG GAGT CTTTAAAGTTGTGCAAATAAATTTTTGTAGTAAGGATT  
GTTGGT CGAAGGCTCTGAGAAAACGTGTA AAAACTTTTTGAAAATAGAAGAAAAGTTTTTTGTAGATGGGAA  
TAAGAAACCTCGGAAGAA GAGT TGAAAGAAG ATTC TTTTAAACAGTTATAAATAGTTAGAGGGA GGGTAA  
TGTGATCGG GGGT AGAGAGGTCGACGAGACGCGTCCCGTAAATAAGTATTTGACAAAAGCGTCAAAGA  
GGCAAAAATATGTGTCCCATGAAGATGTGATT GGAT GAAGCCTTTACCAATTC TCTTCGTAGCCAGTGA  
TCTGTGTCTGAGCTCGGCACCA GAATCC ATCGTTTTGT CATGG GAGT TTGGTTGATAGAGAACAGATCTT  
GAGCAAGTTTAGCCAGCAAGACTTCG GGATAGTTGCTAAACGTTGCTTGGCTGTGAGATAGTT C ATTCAT  
CGGTTTAC ATTCAT GGGT ATTATTGCGAGGAAACGATCTTTCCGTGCATTGGTCGTTACACATTTCTTA  
CAATTATAAATGACAATCTCTATAAGTTCTTTTGTAGTTTTTTCTTGTAGAGGAAAACCTTTGGAAGA  
AAACGCTAAAATTC TGTCTTTAGTTAGTTTCTTTTTTGTCTCTCCGTACATTTTGTAGCCCCCTTTTCA  
GGTAGTTTGGCAGATAGGTTTCAAAGAGAAAATATATTTT ATTC ACTCGGGT CATCGAAATCTTTTGTG  
CT ATTC TAGGAGT ATATTTCTTCCAC ATCCATTC CGTTGTAGGA GGAT ATTTTGTCTTAGTATTGATGGC  
TTGCC ATTC TGCTATTTTCGGCCCTGCAAAAATGG GAAT ATTACCAGAGATGCTGCCTATTGAGGAGCTA  
TCC AAAGCAAATGGCGCAATGACAGCAGCTACCT ATTC TGGAAGTATTTA GGGT CTTGTTTAGCTCCTC  
TTATGGT GGAT TTAACGAAAGATTTTGT CACAAAATAGTTAC GAGT TATCGGCCTGTTTCTGTGTAGTCTC  
TTCTGTTTTAAGTTTATTTATTGCGTTAGGC ATTC GTGCAAGTAATGTAAAAAATAAAGGACAGAAAATT  
GCTTATGTAAGCTTTAGAAATCTTTGGCAGGTCTTCAAGAGACGCGCAATATGCTTATCTGATGATTT  
CCGT ATTC CTTGTTGCCTTCTTTCTTTTTGTTGGGGCCTACGTTCAATTACAAATC ATTC CTTTTGTAGA  
AT TTACTTTA GGATATTC CAAACAT TATGGCGCGTATCTATTTCC TATTGTAGCAGTAGGTATGG GAGT  
GGCTCTTACATGGCA GGATGGAT TTCTGGAAG GGAT ATCAAATTA GGGT TTTCTCCATTAGCAGCTATTG  
GTGTGGGCCTTTCTATGATGGTCTTTGCTTGTCTCTTTTCGATCACC GCCGTGCTTATTTTT ACTC TT  
TTGTTTAGGCCTTGTGGAG GAAT TTATCAGGTTCC TTTACATGCC TAT ATTC AATTC GTCAGCCCAGAA  
CATAAAAGAGGCCAGGTATTAGCTCTCAATAATTTCTTAGATTTTTTCAG GAGT TTTATTAGCTGCC GGAT

TTGTTAGATTATTAGGTGCTGGTTTGGCATTAAACGCCCGATCAAAGCTTTTTATATATGGGCTCCTTAGT  
TGTTTGTGTTTGTCTATACTTTTCGCTGTGGATGTTAAAAGAGCATGTGTATCGTCTTCTGCTTACTC GTGTT  
TTAAAGAGACAAC TAGGGACCAGCTTCTCTTCTCCAAGGCTGAAGAAGTCTGGTGCCTTTTTTGTGCCCC  
CAACCTCCTATAAAGAGACGCGACGTATTTTAGCATTATTCCTAAGACCGTAAGAAGCTGTGTGTTTAT  
TTTAGATAAAGCTCTGCAACCAAGATGGACTTCTTATTTAATACCGCATTGTGTGCCTACTATTTTCTCT  
TATGGCGTGAAGGGCAGGCTTTTGGCGCAATGGATCGATCGGCAGGTGGTAGAGGTTAAGGCGTTGTTGA  
AGAGACAACCTCTTTAGGCGTTGTATGTCTTGGGAATCAAGCGCAGAGTCAGTCTTCTTTTCTCAGTT  
GCAAGCCTCAGGAT TGGCTGTGCAATCGGGGACATTAGTTCAAGATTC TGAAGTAAATATTC TTTGCAT  
TTAGCGAAGTAGAAA GAGTGTGGCGCGTAATTAGGTGAAGTAACTTTGATAGATTTGTCTCCAGCGCAC  
ACTTTTCAGTCTCTTTCTTAGCAAAGTCTTCTATCACAGCTAAGGGCTGCGTAGCAAATAGGC GAATT  
TCTCTATCTGTTAAGCGTAGTAAG ACCAGAGAGGTTCTATACCTAAAAGTTTTT C GAATTTTTTTCTTTG  
CTTTACGAAATAAGGATTTGTGTTTCGGAATAAGCGAAAAAAGAACATATTAGGAGCAAGAATACAAGA  
AAGGCCATCC AAGGAAACCAAGG GAATAAAAACGCTCCAAATAAAACGAAAAACAGAAAGAAATGCGTT  
TCTCCTGCTGATCGGAACAGGGGACCAAAAAAGCGTCTCCAAAAGTGTTTAGAAGTGTGTATGCCAAGA  
CCTCTTCAAAGATCGGTTTCATAAAATTTTCATACGCACAGCATGAACAGCTTCGTGAGACAGCACTTCTTC  
TTTTGAAAAAACC CAAACCAGAAAGAAGCTTTTTGAAA ACCCTTGCGTAGTT GAATCGAC ACTCTGTTA  
TCGGTGATCCATGTAC ATCCCGCTTCCAGGCATCTAAACTTTTCATTAGAGTACACTACCTCTAAAAAAG  
AAGGGTTCACATCGAAGAGT TTTCTG GAATTC TATGGGAAAGGGTGGGATGTACAGGAGCTTCTGCTAA  
TGTCCTTTCTACCC GAAGAAAAAAGCTTGTTTTTCTTCTTTCAGGGCCAGCAAG GAATCC TTTCTTTGTTT  
AATTGTAATAAATCATCGTAAAGGATCC GAAGAGGGGGGAGAAGAAAGAAATTC AAGTGTATTC AAGGCTG  
CTCTCAAAAATGTTGGTCTACAATAGGAGAAAGGCTCCGGATCTGTCTTTGAAGAGAT GAGT TTCGAGAC  
TTCACCATACGTAAGTACAGTTTTTTTGGCAAAGAAATAGCGGTGTCCAATAGGTTGATGAGGGAAAGAT  
CTTGAATAACACGAA GAGT TTAGCTAATTTGTGGGATCAAGAGAGCAAATGTCTTGCATTTTCTGAG  
ACCC AATATCATTGGTCCC GGGAAA ACTCATCGTCTTCAAATTC TTTGCTTTAGCAGGCAGGTTTTGTA  
TGACACAAAGTCTTTACCTATAAGCTCTTTTGGAGAGCTTCTTGGAAAGCTTGAAGAGGTTTTCTCGCA  
GTTCTTCTGTCAATTTTTATCGGC GGATAGGTTAAC ACCCGTTTAAAGTCCCTGACAAGGCTTCTCGTT  
AAGGCTTTACGATATA GGATCGTGTAATTAAGT TTTGGGAAGAAGCT GAGT TTTCTTATGTTGCT ATTC  
CACAAGCGCGCTTCTTCCGCTCTTTCGGAAGAGAAGAGCGGCCTAGCTCATCAATGC GAATAGCACCTGGG  
CTCTGCTTC GGATAGTATGTCTGAAGTATTGAGA ACTCTTTTTGCTTACGAAT TATAGGAT ACTTCTGC  
TTCGTT CAGGAAGTCTTCAAAGAAAACGGCTCATAGGGAAAGAAACAAC ATTC TTTCTCAATGTTTGTGTC  
TGTTTCATTAAACAAAAAGTGGGTGTGAAGAACCGTAATTTTTTTAAAAAAGAGT CATTAGAGAAAAAGCG  
TCCTCTGGAAGG GAATAAAAATCATAAAAGTTAAATGAAGAGGGACTAATATAATCGTATAAGAAAAAGT  
TTTTTTTTTTAAAAAAGCTTTTGTGCGAGAGACTAAG ATCC CGCTTATTGGCATTGTGTATGAAAAA  
TCC TTAATCATTGTT GAATCC CCAGCCAAGATTA AACCTTTGCGTAAGTTGTTAGGAGAAGGGT TTTATTT  
TTGACTCTTCTTGGGGCATATTGTTGATCTTCTTCAAAGGGT TTTGGTATTGATATTGAAAAT GGAT  
TGTTCCGGACTACCAAATTTTAGAAGGGAAGGAAGAGGTTATTC GGAAAATTTGCGCCGAAGCGAAAAA  
TGTGATGTAGTTTATCTCGCTCCCG ATCCAGACCGAGAAGGAGAGGCTATAGCATGGCATATCGC GAATC  
AGCTGCCTAAGGAT ACTAAAATTC AACGTATTTCAATTC AATGCCATTACCAAAGGAGCTGTTACCGAAGC  
TTTGAAGC ATCC TAGGGAAATTGATATGGCGTTGGTCAATGCACAGCAGGCACGACGCTTTCTAGATCGC  
ATTGTGGGATACAAGATCTCTCCG ATCC TAGGTCGCAAGCTGCAACGTTGGTCTG GGGT TTTCTGCAGGAA  
GAGTGCAGTCTGTAGCTCTTAAATTAGTAGTAGATCGG GAATATGCTATAGAACGATTTGTTCCCGT CGA  
ATTTTGAATATCCGAGTGCATCTTAAAG ATCC TCAAACCCAAAAGAC ATTC TGGGCTCATTTGCATTC  
GTGAATGGGAAGAAATGGGAAAAAGAAATTCCTGAAGGGAAGACTTCTGATGAAGTGATTTTAAATTGATT  
CTAAAGAGAAGGCAGATGAGATTGTCGCTCTATTA GAATCAGCTACATATGTTGTAGATCGTGTA GAGTC  
TAAAGAAAAAACGTCACGCCT ATCC TCCGTTTATTACTTCTACGTTGCAGCAAGAAGCTAGTCGTCAT  
TACCGCTTTTCTCTTCCAGAACGATGAACATAGCGCAGACTTTATATGAAG GGGT AGATTTAGATAGTC  
AAGGTGCTGTGGGAT TGATCACATACATGCGAACCG ATTC CGTACGTAC GGATCC TGAAGCTGTAAACA  
GGTGCGCAATATATCGAAGGTCATTTTGGTAAG GAATTC GTTCTTCTTCTCCGAACGTGTATGCCACG  
AAAAAATGGCACA GGATGCACACGAAGCTATACGTCCTACAGATGTTACAATC ACTCCGGAAT CGATAC  
GCAGTAAGTTAACGGAAGATCAGTACAAGCTGT ATTC TTTGATATGGAAGCGTTTTGTTGCATCACAAT  
GAT ATCC GCGATTTACGATAC ACTC GCGATTC GTATTACGAC GAAT AAAGGTATCGATCTGCGTGCTACA  
GGCTCTTGTGTTTGAATTTAAAGGGT TCTTAGCTGTTTACGAAGAGAAAAGAGATGAAGAAGGGGAT GAAG  
AGGAAAAC ATTC ATCTTCCGAAGCTTAATGAGCGAGATGTTCTAACAAAGGAA GAGT TAGAAGCAGAACA

ATCGCATAACCAAGCCTTTGCCGCGATTTACAGAAGCTTCTTTAGTGAAAGA**ACTC**GAGAAGTCAG**GAATA**  
GGGAGACCTTCTACCTATGCCACTATCAT**GAATAAAATCCAGAGT**CGG**GAAT**ATACGTTGAAAGAAGGGC  
AAAGGCTACGTCTACT**GAAT**TAGGAAAAGTAGTTTGTGAGTTTTTAGAAAC**GAAT**TTTCCTCGTATTAT  
**GGAT**ATTGGTTTTACCGCTGGCATGGAAGAT**GAGT**TAGAAGTATTGCTGATAATAAAAAACCTTGAAG  
CAGCTATTACAA**GAAT**TTTGTGA**ACTC**TTTCTTCTTTTGTAGTCACGGCAGAAAAAGAGGCCTTT**ATCC**  
CTCGTATTGTGACAGAAATAGATTGTCCAAAATGTCATAAAGGGAAATTAGTAAAAATTTGGGCTAAAA  
TCGCTATTTCTTTGGTTGCTCC**GAATATCC**TACTTGCAGACTATAAACTTCGGAAAGAGGAGCTGACGTT  
GACAAAAAC**GAGT**ATGCGGAAGAT**ACTC**CTTGG**GATGC****ACCC**TGCGCTCTGTGCGGAGGAGAAATGAAAG  
TCCGGCATGGGAAATTTGGAAGTTTCTTGGCTGCGAGA**ACT****ATCC**GAAGTGTCACTACATTGTTAATCT  
TTTCAAAAAGGGAGAAGCTGGGGCTGAGCCTGAAGCGACAGTGCATTGTCTGCAGAA**GGAT**GTACAGGA  
CACCTTGTGAAAAGACGCTCACGATTTAATAAAAATGTTTT**ATTC**TTGCTCC**GAATATCC**TGCATGTAGCG  
TGATTGGTA**ACTC**TGTAGATGCTGTAATTGAAAAGTATGCAGGAACGCCTAAA**ACTC**CTTATGAGAAGAA  
ACCAAAAGCGAAAAAATCAATAGCCTCTACCAAGGGAAAGGCTGCAAAAACAGTGAAAAAAGCTCAGCA  
ACAACAAAAAACGAGCTACCAAGCGTACACACCTTCTGCTGCTTTAGCAGCGGTGATTGGTGC**GGATC**  
**CT**GTAGGGCGTCCCGAAGCCACTAAGAAGCTATGG**GAGT**ATATTAAGGAAAA**GGAT**TGCA**ATCC**CCTCA  
AAATAAAAAAATCATT**ATTC**CTGATAGTAAATTGCAGG**GAGT**GATAGGAGCTG**ATCC**AATCGACATGTT  
GCGCTATCTAAAAAATTAAGCGCGCACTTAATCAAGGA**GAGT**AGGGGCTTTGTCATG**ACTCG****GAAT**AAG  
**AGGAT****ATTC**CGAGAGAAGCTCCTCTTCTTCCGT**GAGT**TCTTCAAAGCCGTCAATCAGTTGATACACCT  
TTGTGATGAAGACGCTTTAGCTAAGTTGGCTCGTAGAGAACGTACTTTAGGAGAAA**GAAT**GAGGTAATGC  
CCACACAGTTTAC**GAGT**ATCTGTTAGTAGCTTCTCTTCACTTTGATAAT**ACTC**TTCT**ATCC**ATTGTAGAT  
GCTGTACGAACGCTGTTTTCTGTAGAAAAGATGGAGAG**GAGT**AGGTCCCTGTAGTTAGGTAATCTTC  
TATTTGTTTTCCG**ATCC**AAGGAGCTCCCATAGTACCTCGAGCAACGAGGACACCATCAATGCGTAGTC  
TCTAGCATCGTTTTTGCGGCTTCAGGGGAGAAAACATCGCC**ATTC**CAAATACTGGAAATCATCACCAG  
CGGCTTGTTTTTGCTCGAGAAAT**GAATTC**CAAGTTGCTTGGCCCTTGAT**ATCC**TTGGGAGCGTGTCTTCC  
ATGTACAAAGACAGCACTGGCTCCGCTTCTTTAATGATGCGGACAGTCTCTTCCACATTGATGTGGTGC  
AA**ATCC****ATCC**AGATC**GAAT**TTTGACGGTTACCGAACGGAAACCCTTCTACCATCTTCTCAACCACCT  
TCCCGATTA**ATTC**AG**GGT**TTTTAAGCATGCCTGAACCGCTCCCATCTTTAGTAATGCGATCGGTGGGGCA  
**TCC**GCAGTTAAGATCTATAAGATCAA**ATCC**TAAGCCTTCTAAAATTTTTGCAG**ACTC**TCCGGCAAGGTGC  
GGACGCTGCCACA**GAGT**TGTCCACCGATGGGACGCATAG**ATTC**AGCGAAATC**GAGT**AGGCGTAACGTGC  
GTTGAGGACAATAATGGAGGCCTTCCATTTTTACCATTTACAGAACATCAATGCGGGCCGAT**ATTC**AGC  
CGACATACGACGGTAAGGGAAATCAGAAA**ATCC**TGCTAAGGGGGCGTAGACTACGGGAGACTTAAGAGGA  
AGGTTTTTTATAAATATTGAAGGAGCCATGGTGATTGAAAAT**ATTC**AGAACAATGAAACGTACGATTTT  
TAG**GAAT**CATAAAGGGCAAA**ACTC**CGAGACAGAGGAGAGCGATCATAGGGCTGATGTCAATAA**ACCC**TATA  
CGCGAAC**GAAT**TTATGGAAGATACGGAGATAGGGAGAT**ACCC**AGCGAC**GAAT**GATACGATACCACTGTG  
TATTGTGGC**ATTC**TGGCAGCCAGGAACAAGAACGTAAACC AAAATTA AAAA ACTATAAATATTAACCGC  
AGTCTAAGTAAATAAGAAAGCATTTAAAA**ACTC**TGTTTTATAATTAATTAATGTTTTCTTGA AAAAGA  
TGTTTTTATTTTTAAAATGAGC**ACTC**TTCATTTTAAAAGATAAAGAAAAACGCTAAAT**GGAT**TTTAAG  
CTGCCTATTTACTGCATAG**GGGT****ACCC**AAAGTGCAGAAAACGTTACC**GGAT**AGCAATTTTACAGAAAA  
CCTGTAAG**GGT**GGTCTCTGTGTGCTTGC AAAAGCTTACC GAAACAGGCGGCTTGTCTTGGCCAAAACG  
ATTTCTTTCTTCAAAGGTAGTTTT**ATCC**TTACAAGGACAGGAGACTTTAGTAAAAAGTGTGAGCTCTTCT  
TTAAAGAGCAAAA**GAAT**TTTTTAAAAATGGTGTATGCGGAGCAAGAAGCAACCGCAGCATTTCCCTTGA  
AAGATTTAGTGATTGCGCATGATTTAGGAG**GAGT**GGA**ACTC**GGCTCAGGAGCGCGTAGTAACACTAT**GGAT**  
GTTACAAAGACAATCTGTTGCGTTAGCAACAGCTCTCTTGGAGGAGAAGGGG**GGAT**TTGCTACGCACATT  
TCTTGTGCGACCAAAGATCTGTTTTCTGCATTGCAACAGTCTCTTCTTCCGAATCTAGAGACTTATTTTT  
TCGTATACGAAGGTCTTGATGAGACAGTCTGTTATTTGTGCAAGAAGGCTCCGTATTACTGTCTCGTTC  
CTTTAAAAATG**ACTC**TGAAAGCTTATTAGACGATTTATTAGCTTCTTTTGCATACGTTCAAGAAGTATAC  
ACCGCTCTTTATCAGAG**ATCC**ACGGCGCTTATCTATCTAGTTTCGTTACGTACTTTGCTGAGCCGTCGGG  
CTGGCGTTCCTGTGATCATCAGTCTTTTATTTTCCGAGCTCTCTCCAGACCAAGAAGTGTATCGTGATGC  
GGTGGCTGCCGCTTTCAGG**GAGT**GCGTAGCTGCCATACTTGTTCCTTACAGTTGGGGAGATTTCTCT  
CGGAAGGCATGTAGCTATT**GGAT**TAAAAAAGGTTGTGGAGCCTTCTAA**ACTC**GCTTTTGGCAGCGCGC  
TGGCTAT**ATTC**CATAGGCGGGG**GAGT****GAGT**CATTACTTTTAGTCCATAAAGCACAAACAGATATTTAGAGA  
GATCGTCTCTGAAAAGGAAATA**ACCC**GTGTCTTTCGGTCGGCACAGCAGGTAGTGAAAGAAGTCTGTGAT  
**TC**GGACCACAGTTGG**GAAT**AT**GAAT**ACCTCCCTACGGT**ACCC**AC**GAAT**CAAGAAGTGATGGAAGTGCTTG

GACGAATGACTGC GAATCTCCCTTCCGTTTCATTC TCCATTATTTGTATAAATTAGAAGATATTCCTTC  
CGAGGAGCGTCCTTTAGGGGGATATCGGGCTTATATTCCTTACAAGGTGCAGCTAATGATGAAGACTTT  
GCATCTTTTATAGATCAGTTATCAGCTTGGATCGGTGCGCGTGTCTTTCTAAAAAGCTGGCAGATCGCC  
AATTTGATGTAC GAATCGCTCTGCAAGGGAGGGAT AATGCGACGCTTAGGAGTATGGGTGCTGTTACTA  
TTAGCGAGTGGGGCTGCTTCTCTTCCGCAATAGGAGCATGGTGTGGCGTCAGCGTACAGCAGAGGCTT  
GGGAAAATTTACTCATCGATATGAGAGATTTTTCAGTCTAAACGAGAGCGATCTTCTCAGGTAGCAATCAA  
GAATGCGCGGCTGAAAGCAGCGCATAAACAAGC GAGT TCCCCAATTGGAT TGCCCAAGGAGA GAATCTC  
GTTTTCTTGAATAAGGAGCGAGATGCTCTAGCTAAACTTCCTGCAACAGCCTGGGTGGTGAGAAGTCGTG  
CAGTCAA GGATCGGAAGGCTTTCTTAGAAGATAACCGCTTGTTCATGGCAGGAGCAGACTTTAGGAGAGAA  
AAGCACGTTGTTTTCTTTCCAAAAAGAGCTCCAAATAGATGACGAGGACATTCCTGTATTATTA GGAT TG  
TTTTGATCC TAAGTAT ACCCAAAT ACCATTGTTTTCTTTCTTACTGGGAAATGACGAAGCAGGTGTCAT  
CATTAGGAAATGAGGTGTGGGT CGTTCACGCGGAGGCTTGGGGACGATGTGTGTAAGTAGAAGCTTAAGA  
TGGTGTTTATGTTTTCTTTTGTGTGCGGATGGGTGGACGCTGGGT TTATGATAAGCTCCGACTGACAG  
GCATTAACATTATCGATAG GAATGGTCTTTCTGAGACGATCTGTTCTAAAGAAAAATTACAAAAGTATAC  
GAAAATCGATTTTCTCTCTCCTCAGCCTTACCAAAAAGTCATGCGTACATACAAAAACGCAGCAGGC GAG  
TCGGTTGCTTGTTTAACGACGTAATCCGAATGGCCAAATCC GACAATATCTC GAGTGTTTAAATAATC  
GTGCTTTTGGACGTTATCGT GAGTGGCATAGTAATGGCAAAATTCATATCCAGGCAGAAGTTATTGGAGG  
GATAGCAGATTTGCATCC TTCCGCAGAAGCCGGATGGTTGTTTCGATGGAACAACGTATGCACATGATAGC  
GAGGGGCGGTTAGAAGCTGTTATTCATTATGAAAAAGGCTTGTGGAAGGGAT TCGCTGTATTACCACG  
CGAATGGGAATGTATGGAAGGAATGTCCTTACCATAAAGGTGTGCTCATGGAGACTTTTTTGGTCTTCAC  
CGAAGAAGGAAGTTTGTAAAGAAACAACTTTTTGTAAAGGGCAGTTGTCT GGATGTGCATTACGCTAC  
GAGCCAGTTTACAGTCATTGTTGTCAGAAGAA GAATATAAACAAGGGAAACTGCGCAGTGGTAAATATT  
ACGATCC TCTTACTAAGGAAGAAATCGCGTGCCTAGT GAATGGCAAAGGTAAACAAGTAATTTATGGGAA  
ATATGCGATTATAGAG ACCCGACAGATTGTACATGGCGTTCCTCACGGGGAAGTCTTGTATTATTTGATGAA  
CATGGTAAATCTCTGTTGCAAGCATATTC TCTAATCAATGGGCAGAAAGAGGGAGAAGAAGTATTTTTCT  
ATCCAGGCGGAGAAGGTAGAAAAATGTTATTAACATGGTCCCAAGGCATTC TACAAGGAGCTGTGAAAAC  
TTGGT ACCCAAATGGCGCTTTGGAAAGTAGCAAAGAACTTGTGCAAAATAAAAAGACTGGGATTC CATG  
CTATACTATCCCGAAGGACAAGTGATGGCTACCGAG GAATATGTAGACGATCTTCTCATAAAAAGGA GAAT  
ATTTCCGGCCGAACGACCGATATCCATATGCTAAAGTGGAAAAAGTTC TCGGGACAGCGGTCTTTTTTCAG  
TGCTACAGGAGGAT TGTTAAAGAAAGTCTCTATGAAGATGGGAAGCCTGTTATTCATTAGACATGAAAA  
ATATTGTAGAGCAGAAACGTTGTTTGGCAGCAGAAA GGGTTAGCGAAGCGGAGCAGCTTCTGTCCAGCG  
CAGAGATGAAGCAGCTCGTGAGCTGATGCATTTTGTATGCAGACAATTC CGCAAGGCTTTGTGTTATCC  
TATATTCCTTTTCGCTCAGAGTTGGATGTTTCGAGGGATCAATGCATGGTTAGCGCAAGAGAACCGACTCC  
TCCTACCTAAAATGCAAGGGATGGATATCGTTCGATAGCTCTTCTTTTACCAAGATAGA GAGTCTGTA  
TTC TCC TAAAGATTT GAATCAGATAGAAGGAGAAGAGATCGAGGCACAACAGATTGCAGCGGCCCTTGATT  
CTGCGATAGTCTTTGATCAGAACAAGTTTCGTTA GGATATGGCGGAGGCTACTACGATCGTTTTTTGT  
CTAAGTATCCGTATATTTGGACAATAGGCGTGGAT TTAAGAGCAGCTGTTGGCGTATCTTCCAAGGGA  
AGAGCATGATGTTCCCTTAGATCAGTTATATCTCACTTAAAGAGCTGTTTTACGTATAAAAAGCTCCCTC  
CTCTTTCTGCATCTGCATTC TTTTTTTGAAAAAGAGGCCTCTTCTTGT ACTCAAGAAATAGAGAGAA  
ACCTCCATTC TAGATAAAAAA GAGTGTAGTTTTTTTGAATTC TAGCACTTGACTGTTGTCTTTGAAAT  
ATTGCAAACCTGACGCCACGAAATATAAGAGGTGCGCAGATGGCAACCTCTTAAAGTA GAGTCTTCTAGACA  
GCGCAACAAGG GAGTATACATGAGCGTTCCTGACCGAAAAAGGGCTTTGGAAGCGGCCATTGCTTATATC  
GAAAAGCAATTTGGCGCAGGATCTATCATGAGT TTAGGAAAGC ATTC TTCAGCTCATGAGATATCAACTA  
TTAAAACAGGTGCATTTGCTGTT GGATTTAGCCTTAG GAATAGGCGGGTTCCTAAAGGAAGAAT TGTA  
GATTTTCGGGCCA GAGTCTTCAGGGAAAACA ACTC TAGCGACGCATATAGTGGCCAATGCTCAAAAAGATG  
GGAGGGGTGGCGGCTTATATTGATGCCGAGCATGCC TTAG ACCCGAAT TATGCTGCGCTTATTGGAGCAA  
ATATTAATGATTTAATGATTTCTCAGCCTGACTGCGGAGAAGATGCTTT GAGTATGTCAGAGCTCTTAGC  
GCGTTCGGAGCTGTCGATGTGATTTGATTG ACTC GGTAGCAGCATTAGTTCCAAGAGC GAGT TAGAA  
GGGGAATTTGGAGATGTCCATGTTGGTTTGAAGCTCGCATGATGTCGAGGCTCTACGCAAAATTAAGT  
CAACCTTAGCACGAACCAATACTTGTGCCATTTTCATTAACCAGATTC GGGAGAAAATAGGTGT GAGT TT  
TGGAATCCAGAGACTACGACTGGAGGACGTGCACTGAAGTTTTATTC TTCCGATTCGTATCGATATTCGT  
CGTATTGGCTCCATAAAGGGAGGAGAAAACCTTCGATATAGG GAATCGTATCAAGGTGAAAGTAGCAAAA  
ATAAATTAGCTCCTCC ATTC CGAACTGCA GAATTTGATATCTTGT TTAATGAAG GGATTTCTTCCGCAGG



GTGTATCATTGATCTCGCTGTCGAAAAAATATTATCGATAAGAAA GGATCGTGGTTCAACTACCAGGAT  
CGTAAGTTAGGCCAAGGTCGAGAGGCGGTTTCGAGAAGAGCTGAAAAG GAATAAG GAGTTGTTCCACGAGT  
TGGAACGCCGATTTTAT GAGTCTGTACAGGCTTCACAAGCTCCAGCGGCAGCTTGCCTGGATTCCAGAGTC  
TCGCGAGGTAGCAGAGGCTGCGAAATAGA GGGTGTATCCCTATCGATTC TAATCAAGGAAAAGAAGTTT  
TTCTTCTTTTCTTGGTAGTTTCTTTTCTCCCCGCTTTTGTGTGGTTCTCTACATAGGTTTGGTAATT  
CCCGGAAGCTGTAGAGCCAATTTTATAATTTTTCTTTGAAAGGCTAAAATTTTTTGGTGTAA ACTCCACG  
GATCTTTGGTGTGCGACTTCTTTATAGTGTGAGGTTAGATAAAAAGAGACTTCAAAGAGTAAGGCACCTA  
GAGATCAAGCATTFTAACGAGCGAGAAGGCTTTGTGGTTTCGCGTTTCTTGTAGTGGTTTTTCTCCTTT  
CTTGTCTCTGTCAGGCGGAAGATCATATGTATTTTTTCTTCGAGAGACGATTC TCCATCGCATTATGA  
TCATACACATCGAACTGTTGCAAGATTAAGAGAGGGAAGTACCTTGTGCAAGGCTTTTCCATGGAACAA  
GAGCAGATGTATTTACTGTGTTGTCAG GGGTTCCTGTTACAAATTC AAAGAAAGTTTCAAGAAT CAAAAG  
AAATTTTTTCTCGCATTGATAAAAAGAAAACCTTCTGCACCTTTTGTTTTGCAGCGT GAGTTGTTAGAAG  
GC GGATTC TCAATGCCATTTTTTAAATAACCTTTCATTAATGGCA GAATGTATTGCGGAAT TAGAAAAG  
GTATCTGGATCAGAAGCTCATCTTTTATTTTTTAAAGCGTTACATGCACATCGTACCAAACAATATAATC  
TTGCGGTGGATGTGTTATCCCGGTGGTTTGGGCATGTAGATCAGACTAAGCCTCTTTGTTTAGATAC GAA  
TGTCATAGAGCTATTTTCTCCTTATGTTTTTAGAAGAGATAGCAGCTGAAAGCCTGATAGGTGCCAGAAGG  
TATGCGGAAGGGC GAATCGTTATTAACAGTATTTTTCAACAAAATCTTTTCTAGA GAATATGCTTGGTCTG  
TAGACATGTATAACCGTTGGTATTAATGCTAGGACAGAGCTACCTTCTGGAAT TACAAGAGG GGGT GCG  
TAGCGATTTACTTCCG GAGTATTATGAAACGATTC TTTTTTATCAGAAGCAAATGAAAGGTTTTGATGCG  
GGAGCATACAAAAACCTTTTTCCAGAAAGCATGCTGTTTCTACGATCATGCAGCATATTTTTGTCATAC  
CAGAAACGCAGCTCCCTTTGTTTATGGATGCGTTGTTAATGTGGGAAAATAGCTATGTCC ATCCGGACTA  
TTC TTTAGTCTTAGAAA GGATGAAACCCGCTGTTTTACAAGATGGTATACATACGCAAAAATCTGTTCAG  
GCAATTGCCGATTC AAAAATCAAAAATTA AAAAGAAAACCTGATAGAGCTGTTTACGCGATGA ACTCGTTT  
TTTTGTTTTCTCAAGGAAACACAGTGTGCGCTGACCAGTACTTAGCTCTGTTGAAAACGCTAGATCC TCG  
CTCTTCTTGGGGGCATAAGTTGTTACTTTCCGAGAAGGAGATTGT GAATATGGTTTGGCAGGATGATGCA  
CAATACTCGCGATTAAAAGACTATCTACTGTTATGGGAGGAGCAAGATATCGCTGATGTGATCGGCAAC  
AGTTAGTGCATTATCTATTC TCCAGTGCCAAGCATTTATGGAGAGGAGGCCAGGAGGAAGCCTGCCTACG  
CCTCTTAAAGGAAATCC TATTATTTTTCTCAGAAT GAGAAGCCTGTCTTAATCGCACGCTTCGTCGGTT  
AAGCATTTTTTAC ACCAGGCTTTAGCTATGCGGAAT TTTACGCATTTAGTGTGGATAGAGAATTTTTT  
ATGAGGTC GGATGCCCCAAGACTC TAGCTAGCGATGCCGAAATTGC GAATGTTTTAGCAGATGCGCAATA  
TCTTTTTTCTAAAGGCGATTATCGTCTCTGTATTGTGTATAGTCTTTGGCTGGCGCGTGTGGCTCCTTCA  
ACAGAAGCCTTGCAACTACTTGGGTTAAGCTTAGTAGAGCAAAA GAATACACGGAAGCTTTGGAAGTAT  
TTCAAAAGCTTCTTTAGGGGAGGATGCTTGGAATTC CCAAGTACACAAAGCTTCTTTTTGTGCTATAA  
ATACATAGCAGCAGCAAAAAGAAAATCTTTCCCGT GAATGTAAATCAGCACGTTCAAGATATGTAC  
CATCTTTGTTAGCACAAACATATTC TTTCTCCCTTTGATATAGCTTTTGCTCAAAAAGCATTATTC CAGGA  
AGAGT TTAGTCAGGAAGCAGAAGCTTTCTTAGCTACAGC ATCCGCATTATTGCGTTGTGGTTATCC TTAT  
TTTTCTATTTGTGATGAGACGATTCATCC CACGCTCCAGGGAT TTTCAAATAAACA ACTCTTCCAATGGT  
TCCAGCTGTTGTC ATCCCGCATAAAAAGAAGAACTGTTTGAAGTTGTTAATCATAAAATTTATCTACGCTC  
ATTATTTCTTTTACGGGAGAAGGTGTTTATAAATGTCATAGATTGGCGGGAGCCGTTCCACGTACACCT  
TTAATTTTTGAAGAGATTGCTCTGCTCTCAGAAGAGCAGAACCAGGTA CTGAAAACGTATTAAATTC TT  
GCTTCTCTCTCGTTTGTGGAGGACCAGGAACAGGCAAAACATTTT TAGCTGTTGATGATTC GGTGAT  
ACTTGCGCAAATTC CTTACGCGCAGATCATGGTAGCTTCTCCAACGGGGAAGCTTCCGCTCATCTGCAT  
AGCGTATTAACGTCTCAGG GAATCGTTGGAGATTC TGTAGAAGTCGTTACGATTCATAAATTTTTAAAAG  
ATATGCGTAGAGGGCGCTCCCCTGTAGATCTACTATTGGTTGATGAAGGCTCGATGGTGACCAT GAATCT  
GTTACATGGACTGATTA AAACCATACGAGGA GAATCC CGAGGGGAAACGATCTACGCAGATAGAATGGTG  
ATTTTTGG GGATGC GAATCAGCTTCTCCAATAGGTATTGGAGT GGGAAATCC TTTTCATGAAGTAGTGT  
CT GAGT TTTCTAAACAGGCATGCTTTTTATCTACCAGCCACCGAGCTAAACATAAG GAATTACAGGAAT  
AGCGAGCGCTGTTCTGCGCAAGGAGCTG ATTCCTTTTCAACCTTTGCCTTCCCAGCAAGAAGCTATTCGG  
CGATTGTCTTTTGTCTTTTACACAAGCAGCAAAAAGAAAG GGGTGTGCTTATGTGCTTTGACTCCGATGCGCC  
AAGGACTTTGGGGT TTTTTGCAGTT GAATCGGTTGTTGTTAATGAGATGCAGGAGAAACATCCACGGGC  
ACCTATTCCTATCATCGTGACAGAAAGATATGAAACGTGGGGAT TAAC GAATGGAGATACAGGAGT TTTA  
GATCCGTAAACGGAACAATTGCGTTTCAT GAATGGGGAGATTC TGCATCAAGCAGATTTTCCCTATTATT  
CTTACAACATATGTCATGTCTGTGCACAAAAGTCA GGGTAGT GAATATGATCGTGTGATTGTTATTC TTCC



TAAAGGCAGTGAAGTCTTTGATTCGGCAATTCCTATACTGCAATTACAAGAACCAAACAACACGTTGAG  
ATTTGGGCTGATCGAGAAGCTTTAGAGGCGATCATTTTGAAAAGAGGGCGTTATTAATTAGAGCTGGCAC  
ACTTTTGTCTCCTAGTAAAGATGAATGATTCAGAAAAGAAGGAGCGGACGTTATGGACCAGTTATCACAG  
ATACATCAAGAGCTAGCTCGTTTGAATTTATCAATGATCAACTGCAGTCGGAAAAGAGCGTACATCCATG  
ATTTATTTGTGTGCGATAGGCTTTCCTGAAAGGTTAAAGACGATAGCCGCGATAGCTAACGAAGTGCTTTC  
CGAAGAAGATTCCCAAGGTTAACTGGGCTTAAACATATCCCGCAGTATCTTTTTTTCGGTTTCTATTATT  
AAGACCTGGGCGTTGTGCCAGGTCTTGTGAAAAACGGGACGGCATTAAAGAAATAGGAGAAAAGAGTCTCC  
TAGATAGTGTGACGTACCATAAGGATTTGCGATCATCTGAGCAGACGATCCTTCAAAGAAGATTTTCCCG  
TCAATGATAAGGTAACAACGATCTGCGATAGATAAGAGTCTTTTTCGGTTATGGTCGGTAATTAAGATAC  
CAATACCGCAGACTTGCCAAGAAATTTGATTAGGTATTTGACATTTTGAATGACCAGAAGATCCACGTTAGC  
AAAAGGCTCGTCTAGTAAAAGAACGCTAGGATTCAGAGCAAGAACACACGCGATTTCCAATCGGCGACGT  
TCTCCGCCGATAGCGAGCCGGCTTCTTATGTAGACTAGTAGTCAATTGAAGATCATCAATGAGAGCAT  
TTAATAGGTGCGTTTGTCTTTTTCGTGTTTTATAGATAATTTCCAGAACGCAAATTAGGTTTTCTTTAAC  
AGTCAGCTCTTTGAAAATAGTAGGTTCTTGCCTAGGTATCCGATTCGAGGCGCGCTCGATAGTCCATA  
GGTTTTTTTTGTAATATCTGTATTTTTGAAACAAGAAATTTTCCAGAATCAGGACGGATCAACCTACAGTTT  
GATAAAAAGCTGTGGTTTTTCCCGCTCCGTTAGGGCTAACAACCCACGATTTCTCCTGCATTGACTTG  
AAAAGACACATCATTTGGTACAGGTTTCTTATTGTATTTTTTGATGAGGTTGCAAACGGATAGTACTGAC  
ATAAAAAGGATAGTTTTTTAAGCAAAGAGAGAGAGGACTTTCATTCGCCTTCAGCCATCCCTCTACC  
CATTTCTGGTTCGGCATCTGGAGTGTAAATAGAGAAAACAACAATATACACGCTCAAAGAATAACTTTTG  
TAATTAAGAAGTCTCCAGTACCTTAAAAAACATAGCGCGTTCCGCGGTTTTCAGTTTGTAGACATCCGTG  
TTAGGTGCGATAAGAGTCTCGACAGTGTAAACTTGTATTGGAGAAATGTAATCCATACAGGACTTATC  
TATGGTGCAATAAAAATAATTGCTTTTCTGGAGAGATGATTCGCTTGCAGACTCAAGTTTTTTGATTTTC  
AAAAATGGCGGAGCTGGTGTACGAGTCTTGGTGTACAAGCGTGAGATGGTAAAATCTCCCATTTTGA  
CAACCGCTAATGCAGTTACGCAAGCACATAATATTAAACTACCACACACCAGATGCCATGAAAAAGAAA  
CTTCGTACATACAGAAACAGCATCCATTTCTTGAATGTAGGTGAAAAGCTGTACCAAGCAGGAAGCAATC  
GTTCTAAATCTTTCAAGGAAAGCATAGAAGCAGCATCACTTAAAGCGGATGATGGGTTCGGATGGGTTC  
TATGAATAATCCTTGTACGCCAGCGCTATAGCAGAACGAGTTAGGACAGGGATAAATTCGCTCTGGCCA  
CCACTTTGGCTATGTAGTGTCTCCCGTAGTTGTACGGAATGAGTTCCATCGAAGACAACAGGGAACCCAA  
AGCGACGAAGAACTTCGATAGAACGCATATCAGAAACAAGATTGTTGTACCCAAAAGAACAACCGCGCTC  
TGTTAAGATGATTTTGTATTCTTCTGTGGACAGTACTTTGTCAATAGGGCCTTGCATTTCCCAAGGAGAA  
AGGAATGGCCTTTTTTGTATTTAACGATCGCTTGCCTTCCCGCAGTCCAGGAAAGATCTGTTTGAC  
GACATAAAAAGCTGGGACTTGAATAATATCACACACTTTAGCAGCTTCCCGTCTCATCTGGAGAATG  
CACGTCTGTTAAGATTTCAACATCTAGCTCTTCTTAAATTTTCGCCAGTGTTCGCAACCCGAGTCTGAGT  
CCGGGGCTCGATAATTGTGTACGGATGAACGATTTGGCTTTATCGTAACTGCTTTTAAAAATCCAAATGAA  
CAGAAGAAGCATAACGGAGCAACAATTTCTTTTAAATCGTCGCGCTGTTTCGAAAACAAGATTGTCTCAAT  
TACACAAGGGCCTGCTATCAAGAGCATTTTGTTTTCCGGAAACATAAAAAGGATATCCTTTTTAAAGATTG  
AATGCGCCTTTAGTCAAGATTCTTAAACGATCTTCTCAGCTGACAGAAATTTGACTATACACCATTTGCG  
TTTTGATTGGTACGAGAAACCTTGTAAAATCCTAGGAAGAGGGCTTTTTTAAAGAGGAAATAGTGAATCCA  
AGGAATGGGTATGGGCAAGGATTCGGCGGATTAGCAGTTTGAACAAGCATCTCAAGGAATAGAAGAAGG  
AAGAGTGCCTCCAGAAAATCGAAGTCAAGGTATAGTATCTTCCAGCACTATGGGAGTGTTCCTTGCTG  
TGGACCGATAGCTCAGTGGATAGAGCATCCGCCCTCTAAGCGGATGGTCGCAGGTTTGAATCCTGCTCGG  
TCCGAGACACATGCTTCTTTCTTTTTCAGATTTTATCTCCTTTCTCTCGTGAAAAAATACTTTTGACTCAAG  
TAAAATACAGAAAAATCTTTGTATTGGGGAGTCTCTTGTATGGACACGCAATTCATAGCGAGTCCGTCT  
GTTTCGAAACCAAGAAGTTACTTCTGTTTCAGGCAAAGTAAAAGAAAGATTGATGTCCCATCAAATATGA  
CTTTTGGAGGGCCAGTTCTGTTCTTTAGACCAGTTGCGGCAAGCTCTTATCGCAAAAATGGGAGAACAGAA  
AGGGCAGGAGATGTACGACCGTTTCATACAGTCTTACTGATTTCCACATTCACAACGGTTCATAAAGAA  
ATGGATCGAGCACAACGCGCTTCAAAGAAAATGCGTTCCGTATACAGAGATTGATGGAAATTCGCTACTT  
CTTAGCACGACCCCTTCTCGAAGAAGAGGTGTGCAGGCTTGCTAATAACAGGAAGAACTTCTTGTTTGAT  
GCCGAGAAATATTTGATTCAGATTTGTTACAAACAACATTTTATTTAGCCAAACCTTTAAGCAGATTTCT  
CTATGACTCAGGAGGTTTGGGAGTTGCATGTGCAACATGTGATAAGTTTATTGAAACAGCAGTTCCGGAT  
TCTTACAGATCATGCCCGATTTTACTAGCCTGTGAAGCCCGGAGGTTGTTTCTTCTCGAAAGTTTAGAT  
AGTTTTGTAAACATTTCTTAAACGGTTCGGAAGGTTGAATAAAATCTTTTCCGAACCGTATCATAGAAAGG  
TTTTCAAAGACGAAGTCTGTTTTAAGGAGGCTTGATTCCTGGAAATCCCTGCTCCAACGGCTGTTTTTTC

ATTTGTAATTGATGAACAATTAACAGGACGCCTTGATAAGGGGCTGGTCTCATATAATGGAGCGTATTCACGAGCTTTTTTATCAGCAACAAATTGAGTTAGGGCGTGTCCGTGTTAATGGGCGGGTGTATACGCGTGTTCCTCCATCCGTTATCCCTAGGGGATGTGGTAGAAGTGAATTGATAGAAGAGGAAGAACCCTCTTCTTTAATCCCGGAAGATATTCCTCTGGATAAGGTATATGAAGACGATATGATTTTGGTCATTAATAAACCAAGAGATATGGTTGTCCATCCTGCTCCTGGGCATACGCAAGGTACGGTGGTGCATGCTTTATTACATGAAATCGGAGAGCGTCTGAAACAAAGAGTTCCCCGAGGAGCCATGGCGCCAGGGATGTACATCGCTTAGATAAAAGATACTTCCGGCTTATTGATTACGGTAAAAACTC GGCGAGCTAAGGCTCTTTATAGTGAGCTTTTTGCTACCAAACAGGTA AAAAGCTTTACGTAGCCATTTGCATTAATGCTCCGTCTCAGGAACCTATTCATACTCGGATTAACGCGTCAATCCCTCTAAAACGGAAGAAATGACTGTGCTTTCTACACATGCTGAAGGCGGTAAGGAAGCCATTACCCATTGTTCATGTTCTAGCTACGAATGGACGATTAAGTGTGGTTGCTCTATACCCAGAAACAGGCAGAACCCACCAGCTTCGTGTACATATGAAGCACCTGGGCACCCGATTCCTCGGAGATCCCGTTTACGGGATCCCTCTATAAATTTTCGTTATGGTCTTGACAAACAACAAATTGCATGCCATAGCTTGGTTTTTGTCTATCCGGAGAGTGC GGAGC GAGTGAAGCTAGTGACAAAGCTTCCAGACGATATGACTTCTTAATAGAAAAGGAAATTTAGAGAAGGTGTCTCTATACTGGATGGTTCGTGTGATTGGTTTAAAATCACTAGGTAGTTTTGTTTTTAAAGTAAGAAGTATAAAATTAGATTATAAATACTATTTTTATTTTTCTTTTACACCTTCAGAAAAAGCTTGTGTAGGATTTGCTTCGCATGAAAAGGTTTTTAGCGTACATTGTAAAAATCTTGTGATAAGCCAGAGGAAGTGCATCTGAAAGAGGTGCAGGGAACCAATACGATTATCTACGAATTGACTGTTGCTAAGGGAGATCCGGTAAAATTATCGGTAAAGAAGGACGCACTATTAAGGCTATCCGTACTTTTATTGGTTTTCCGTAGCAAGTCGAGATAATGTGAAAGTCAGCCTAGAAATTATGGAAGAGCGGTA AACGTATACGTTTACAGCTTTTTGTGTCATTGTTAGAGAAAGTCTTAGCGCGGTATTTTTCTAACACCGTTTTTCTTCGAGAAGACTGTAGTCTTTTTGGCCCGAGAGTTTAAAGGATCTCAAGGGCCGAGTACGTTTTAGAAGTCTCTTCTTGATCGAGCGCAGCGAGTCTTTTTGCTTTCTTATGAGCGGAGACTCTCTCGGTAGGTAGGTCAATAATTTTGCATTTTTTGCTTTTCGATGCCCGAGTTGTCTGTAGGTTTCGAGCAGCTTCTTGATGTAGAGAACTGTGTATTTTTCTAGTTGGCTCAGATCTTTTTGTACGCTACTGCGTTTTCTTTTCTAAGCATGCCAGCTCCTTCTCGTAGGAATTTTCATCAAACAGAGGATTTTTTTAATAGTTAGAGCTGCTAGTTGAGCGGTTGCTTGCTTATCAGGAGCCGGAGCGTGTCAAGAAATGGAGTCAGAGCTTCCAAAACAGCGTTGTGAATGGCACTTGATGAAGGAGAGTCTTTCTTTTAGAAAGCATGGAGCGCACGGTATCGTAAAGCTTATGTTAATGAATAGATATTC TAAAGTTTTGTGGTACAGCTCGCGGCTTAAAGGAATCTTCTAGTATGAGTAAATCTTTTTTTAGGTAATTTTGGAGAGTCTCGTTTTGTAAAGCTAGGATTTTCGCTGATCGTTGTTTTCCCAAGTTTTTCCCTGGTAAATAGCTGTTGGCCGAGAGGTTAAGATAACCTGACATTCGTATGTGTATATAGAGGGCGTAACAGATCTTTAGCGTGGATACCTTTAGGGAGTTGATCTCGATATGAGGGAGTCCGTAGAGAAATCTTGAATCGAATCGATTTTAAATGATTCCTCGTTTTGTGCTTTTCGATAGAACGAATTAAGAGTCTCTGTAGTTGTGGAAGGACAGATTTCTTTGATTAGCAAGGTTTTGTTCATTAATAATCAATTTGTGCGCGCAGAACAATGGATCCTAAGCCATCTTGGTAGTCGGAAGCATCCATCGTGCCTCCTGAAGGGAAGTCCGGGAAGGAGAGAAAACGGTTGGTCAATTCAGTATAGCTATTTGTGCTTCTAGTAGATCACAAAAGTTGTGAGGGAAAATTTTTGTAGTCACTACTGCAATGCCATCCACGCCATGAAGGAGTAGTAGAGGAATCTTTCAGCTAAGATATCAGGTTCTTGCTCTCTTCATCGTAAAGATCATGGAAGGTATGAGATCCGTATTA AAAAGTACCTCTTTAGCTAAAGGGCTTAGCCGCGCTCTATATAACGAGCCGCTGCATGAGGATCTCCTGTGAGA GGGTACCAAAAGTTCCCTTGTGTCTCTATCAGGAACCTTTATTTGCCAAAACGACAAGAGCTTCCACGATAGGCGCATCACCATGCGGGTGCAGCCCATCGTACGTCTGCGATATTAGCCACCTTATGCATTTTACCATCATCCATACGGAATAAGGTCCAAAGAAGCCTTCTTTGAACAGGCTTGAGGCCATCTAAAACATGAGGGATGTCACGTTCCAAAATGACGTAAGACGCATACGTGTGAAATGAGTTTTAAATAGGTCCGAGAGGTGCTCATAAGTTGTTTTATAGCTAGAGGTTGGTAAACAGATTC TCAATAATAAATAGTTTTCTCTCTTTTTGTGTTTTTCCCATGTA GAATGTAAAAGTGTGTCGAGGGTTTTCTGTATCAGGAAGAGAACTGGAGTTAAGCGCATGTCTGCGCCGATAAAAAGATTTGATTC TTTAGGAGAAAATTTCTCCTAAGCCTTTGAAAACGAGTAATTTCAAGAGACGATTC TTTTTTACCAGTGTGTTCTATGGTTCGAGGTTTTTCTTCTGAGTAGCAATAGAAAAGTGGCATCTTTGTGGCGTACTTTAAAAGAGGGTTTTCTAGGATAAATAGGTGGTTGCTTGCAACAAGAGGAAGAAAGGTTTTTAGGAAGAAAGTAATCATAAGATTACGAATATGCATACCATCAACATCCGCATCTGTTGCTAAGATCACCTGGTTGTATCGAAGATTTTGTAGAGAGTCTTTGTGCAGGCCGAGGGCTGTAGCAAGGTA AAAAGTTCGTCATTTTTATAGATGGTTTCTTTGGAGGAAAAGACGTTCCATAGGTTCCCTCTCAAAGAGAACACTGCTTGTGTGAGCGGATTTCCGCGAAGCTAGAAATCGAAGCGGAAGCCGATTCCTTTCAGTAATGAAAATAGAGGAATTTTTACCATACAGAGAAATGTCTGTGAGATGAAATTTACAATCCCGAAGTTTAGGGATTTTATAGTGGAGTTTTTTTTTGTTTATCTTTGAGCTCTTGCTTGAGAAATTGCGCATTCCTCCGAGTTTTTTCGTTGAGTTTGATTTTTCT

CTTGGATCCGTTCCGCGCTGGAAAGGATTCTTTTTCAAAGAAGAGACACAGCTTCTTTTACGCGTTTGGC  
TAACTCTGCGCGGATATTCGTATTCCTAGTTTATTTTTGGTTTGGGATTCAAAAATAGGAGAAGCAATT  
TTAATGGCGATACAGCCAGCAAGTCCCTCACGAATATCTTGAGAGGAAAAGTTTTTCCAAAAAATCAT  
TAACGCCCTTGACTATACCCCTCTTTAAAGGCAACGAGATGGGTTCGCCATCAGTTGTTTCTTGGCCATT  
TACAAAGGAAAAATATGTTCGGAAGACGTTTCTGTATGGGAGAAAAGAAATGCGAGATCGGAGTATTGA  
AACGTAATAGGGGAATACAGAAGAGGGTTTGCACCTTCTTCTTCAAAAAGATCAAGAAGACCACGAGTGG  
AAACAATACGTTCTCCGTTATAAATAATTGTAGTCCGGGATGGAGATAGGTGTATTGACGGATTTTCTT  
TTTTAGAAACTCCACTTGGAAAGAAAAATTCCTCAGATAGTTTCATGATCGGGAGAGAAAACGACTTCTGTA  
CCGTCGGATCTTGGGTAGCGCCCTGTTCTGTGTGTAAGAAGATGCCTTTGGAGAAAAGAAGCTTTGAGGA  
ATTTTTTGTTCGCGACAGAACGTACAGAGAAATGTTGCGATAAGGCATTAACGGCTTTCAGTCCCACGCC  
ATTTAATCCAACAGAAAAATGGAAAAATCCTCAGTGTATTTTCGCGCCAGTATTGATTTTAGAAACACAA  
TCAATCACCTTCCCAAGGAATGCCGCGCCTTCATCACGAATAGACAGTTCGTGTGCGTCTCTGTGTA  
TGTGGATGGTATGTCCATATCCCATGACAAATTCATCAATAGCATTATCGACTACTTCTTTAAATAACGT  
GTAAATGCCGCTTTCAGCTTGAGATCCGTCGCTAATCTTCCAATATACATTCCTCGCGGTAGGCAGATA  
TGATCCAAGGAAGCTAAAGAAATGATAGAAGATTCGAATACGCAGTTTTTTTTTCGCATAAGAGTGTGTG  
GAATAAGACAAAAGTTGATTCGGGTCTATAATTTCTGAGAAAAAATCAGCTAATAGTTATGCTCTCT  
TTAGAAAAATAATGTAAGGCGTAGTATTTCTTTTAGTCTTCTGTCTCACTAAGCAGTGTGAGCGGTGAGG  
ACTTGAGATACTAAGATTAAGCCGTGGAAACGCCTTTTTTTAAACGGTTTTTCTATTTTTCGTCTCCAGACTA  
CAAAAATTTTTTCAATGCAGAGAACGAAGAAGTCTCAAAAATATTTGGTATAAAAAATACGAAACAAAGAGA  
ATAAGCCAACCGAGAGAAGAAGCATAACAATCTTTTTCTTTAGAAAGGGAATGATGAGAGGGAGCTTAAGG  
AGTAAAGAAGAAACCCTGATGGTTAGGGAAGGGGAAGAAGCTATAGGTAATAAGATTTTTGTTGGCGTTA  
TTGGCGTGAATATCGAGAGACTACTTTGCAGCAACGAGAGCAAGTTCCTCATATTTTACAACAAGCACA  
GGGGTCTTTTTCGTCTGAAGTCTTTCAAGAAGAGAGGGACTATGTTTTATTGGCTACGTGCCATCGCGTC  
GAGTTGTATAGCGTCGCGCCAGCCGAGCTATTTGATTCCTGGCACAGGAAATAAAGCTCTTAGGTGTCT  
CGCCTTATTTTTATCGAAATCAAGATTGCTTTGCACATTTATTTTGTGTAGCAGCGGGTTAGATAGCTT  
AGTTCCTGGAGAGACGGAGATTCAGGACAAGTGAACGTGCCTATTTACAAGCTGCTAGAGAGCAAAAG  
CTTTCTTTTGTCTCCATTTTCTCTTTCAAAAAGCCCTTAAGGAAGGGAAAGTATTTTCGAGCGAAAGGAG  
GCGCGCTTATGCAGCAATCACTATCCCTATTCCTCGTGGATCAGGAGTTACGAAGACGTCAAATAGATAA  
GAAGCCTCTTTGTTATTTATAGGCTATTCCTGAGATCAATCGTTCGTAGCTTATCATTTCGAAGGCAA  
GGATTTTCTTGTATCACCTTTTGTCTCGTCAGCAGCTGCCGACGTTATCTATGCGTCAGGTAGTAAGAG  
AGGAGCTATGTTTTCAAGATCCCTTATCGCGTCGTGTTTTTAGGTTCTTTAGAATGTCAGTATGCTCTGCC  
ACATTCCTTTGGGAAAGTATCTGGATATCCCGGATCGGATGTTTTTGTATTTGCTGTTCTCTGCT  
CTGCCTTCGCATACGGTATCCCTCACCGGTACATGGATATGGACCAATCAGTGATTGGTTAAGAGAGC  
ATCGAAAGGAAGTGAATCAGCACATCTCGACAGCTTGAGAGAGGTTGCGTACCGTTATTGGAACTCTCT  
AAATCAAAGATTAGAACGGCATGACTGTGTAGGAGCGAACGCCCTAGTTGGACTGTCTCTGGGTGTGTTG  
CAAAGTACAGAGCAAACAGAATAGAATCTCCTGTAAAGGCTATAGAAAATAGCAAGGAAATGGAGAGCGA  
TCGTTTCTATTTAAAGCCTTGAGACTCTTTTTCTTTCAGCTTAGTTCTAGACTTTCTAAACTGTGAAC  
TTCAAGTTGATTTATTTGTGTATTAGAGGTACGTTGCCCTATTCAGCCTTTCATTCGGAAGCTTGCAT  
TCTCTAATATGATGAATGCAAAGCCTTGATAGAAAGCAGGGGAGGGGATCTGTTAAGCTGCGCTTAAC  
CTAAGAACGAAGAGAGGGAAGGCTTCTCTTGTGATTTCTTGGATACATACTTTTCGCACATAAATGACTC  
TTTTGATGCAGTGGCACGATGTCCCTGCGTGTGTGCGATACGAGAGCTGCTCTGAATGAGTTGATTTGTGC  
CGGAAAATGTGTTTTGGGAGATGCTTTAGAAATCAAAGAAGGAGTCTGTTGCGTCCCGATTTTTTTCT  
AAAATTCCTTTTGTGCTTTAAATTGAAAGGATGAAAGAGAAAACAGAAAAGGCTCCACTATCGAGATGAG  
AAATCGTTTTTCTTTTAAAGTAGGTATTGGCATACTCAGCATAAGATCAGCGGGGCCATTCATAG  
CTAGGGAGGGAGTATTTCCGACCCAGAGCTCTCAGTTAGAGATGAGCACGTGAACACATGTTGGAAAAAT  
TGATAAAGAATTTGTGGCGTATATGGGAGTGGCTTCCGAATTAAGATTCGATGCCGATGGATCCATGT  
GCTTCCGATTAGCAGCCTTGTGCAGGATGCGCGTTCGTCAAGATGCTGATGAGGAAATATCATCAGTGT  
TTTTTGGGAGAGATTCCTCGCATTTATGGATATAGAAAAAGCATATGCTCGAATGATGGAAGGCAATTTGT  
TTGGCCAGGAGACTGGGGGAGCTGCCCTAGGGCTTGATAGTGTGATGGGCATGCAGTGTCTCGTACGGCAGT  
CCCAGGAGAGGTGTCTCAAGAAGATTTTGAAGTTATATAGAGAGTGTCTCTGAATATGCTGAAGCGTGG  
CTAGAAGATTTAGGACTGAGTAAAACGGAGCAGGAGTAAGGGATGGGTATACGCTTAGTTATTGATAAAG  
GGCCCTTGTCTGGAACGTCTTATTTTAGAAAAATGGGACGAGTTGGTCTCTTGGCAGTGTGGAAGG  
TAGTGATATTCCTGCAAGATGAAAAGCTTGTCCCTCTCAGATTCGCATCACTTTAAAGATGGCAG

TATTATTTAGAAAATTTAGATGCTTCGAGGCCGGTTTCTGTTGATGGAACAGTTATCACTGCCCTGTTT  
TGTTAAAAGATGGGGTTTCCTTTGTAATGGGAAGCTGCCAAGTCTCGTTTTTTAAAGGGGAAGAGGTAGA  
AGGAGATATAGAGTTATCGTTCCAGACAGAAGGTGGTAATGAGGGAGAGCCTGCAGCGCAAGGCTCTTCA  
AGCGTTTCGTCCGAAGCTCCTAAAAAGGAGACAGGAAATCCAAAGTCTTCCTTCGGAGACAAAGGCTTCTG  
GAGAAGTATCTAGTTCAGCAATAGCGAAAGAACAAGAGTTAGCGGCGTCCTTTTTAGCTTCTGTTGAGAA  
GGAGCCTGGAACACCAAAGAAGTCTCTGAGCCAAAGGTCTCTTACAAGAAGGACAGACTCCTTCTGTT  
ACAGGAGAAAAAAAGGATCTTGAGCTTCCTTTGGCAAGTCAAGAACAACCTAAACAACTACTCCATCAG  
GCAGTGGTGAACCAACCCAAATCTCAAACGCGAGTATGGAAGAAAACAGAACATCGCCCGATCAAAATCA  
GCAGCCACAGCTTCTTCTGCTTCAGAATCGGGTCTCAAAGTCCGAAAATCAGGAGCAACAACCTTCT  
CAAACGCCTCCCCATCCCGGAAACTCCAGAGCCGTCAGGAGAACCTAATAGCGCTACGGAAGAAAACT  
CGCCATCTCCAATGGAGAAAGCTTCCGTAACAGAAGAAGGCAGCTCAGGGACGAGTGAAGAAGAAAAAGA  
GGGTGAAGAAGATACTGCTGAAAGCGCAGCAAATGAAGAGCTAAAGGCAGAGGCTTCTCAAGAAGAAGAG  
AAGAAAGAGGAAGATAAAGGAGAGGTTCTTGCTCCCTTTAATGTTCAAGGATCTTTCCGTTTTGATCAAG  
GAATCTTCCCTGCTGAGATAGAAGATCTTGCACAGAAACAAGTTGCGGTTGATTTGACGCAACCATCAG  
ATTTTTGTTGAAGGTTCTTGCTGGTGCGAATATCGGTGCTGAATTCATTTGGATAGTGGGAAAACCTAT  
ATCGTAGGAAGTATCCGCAGGTTGCAGACATTGCTTAAAGTGATATGAGTATTTCCGCGCCAACATGCGA  
AGATCATTATCGGCAATGATAATTCAGTTTTGATTGAAGATCTGGGTAGTAAAGGATGGCGTGATTGTTGA  
AGGGCGCAAGATTGAACATCAATCTACGCTCTCTGCCAATCAAGTTGTTGCTCTAGGAACAACGTTATTC  
TTACTTGTGCGACTATACTGCTCCTTCCGATACGGTAATGGCGACGATTTCTTCTGAAGATTATGGGTAT  
TTGGTCGTCCGCAATCTCCTGAAGAGATTGCTGCCAGAGCTGCGGAAGAGGAAGAAGAGAAGAGAAAACG  
TGCTACGTTGCCAACAGGTGCTTTTATATTAACCTTGTTCATTGGAAGGTAGCTCTGCTCTTTGGAATA  
GGAACAACCTTCTTTGTTCCATACGAAGGAAGTAGTTCTATAGATCAAATCGATTGATTCATGATATTG  
AACATGTAATTCAGCAGTTTTCCAACGTACGGTTTACGTTCAATAAGAACAATGGACAGTTGTTCTTAAT  
TGGGCATGTAAGAAATAGCATTGATAAGAGCGAGTTACTTTACAAAGTGGATGCTCTCTCGTTTGTCAG  
TCGGTAGATGATAACGTGATCGATGACGAGGCAGTATGGCAAGAGATGAACATTCCTTGTCTAAAGAAC  
CAGAATTTAAAGGTATCAGCATGCAATCTCCAGAGCCGGGATTTTTGTAATCAGCGGGTATCTAAAGAC  
AGAAGAACAAGCAGCTTGTGTTGGCTGATTATCTAAATCTACATTTAATTACCTTTCACTATTGGATAAT  
AAGGTGATTATCGAATCACAAGTCATGAAAGCTCTTGTGCAATCAGGTTTTGCGAACG  
TTCATGTGTCCTTACCAATGGTGAAGCTGTTTTGACAGGATATATCAATAATAAGATGCAGATAAATT  
CCGAACGTTGTGCAAGAAGTCAAGATATTGCAGGATTCGTGCGGTGAAGAATTTTGTGCTTTTGTGCT  
CCTGCAGAAGAAGGTGTTATTGATCTAAATATGCGGTATCCAGGCCGTTATCGGGTAAACCGTTTTTCAA  
AGTGCGGGGATATTAGTATTAATGTTGTAGTTAATGGGCGTATTTAACTCGAGCGATATTTTAGATGG  
AATGACGGTAACAAGCATTCACCCGATTGTATCTTTTTAGAACGGGAGGGGTGAAATATAAAATGAG  
TACAATAAATAGGCAGTTCGAGGTTATTTAATTCCTCCAGGTAGGAATAAATCTATGTTAATATGGAA  
AATTCGGCAGCTAAAGGAGAAAAAGCTGCTCGTCAGTTGTTTGTATCTTGAACAAGACATGCACGATGTAG  
CCAAAGCCCACGAAGTAAATGCTAATGTACAAGTAAAGGTGCAGACGCTGACATCTTCTCTTCGAGAAGG  
GGCTTTTAAAGAGTCTTTTGAGAAACAACAACATTACTCGCGGATATGTAGCTCTTCAAAGGTGCTA  
GGACGTATCAACCGTAAATGGTGAATGTAAACGGTAAAAGAGAAGGTATCTATGGCGAGCGGAAGTTG  
TTCGGCTTTTAAATTTCAACCAGATGCTGGATGGCGTATGTAATAACGTTTCAAGGAGTACAACAATATCTA  
ACAAGATAGAAACATCCACGCAAGGAAGTGTAGACCTAGGGACAATGTTAATTTGCAATTCGCATGC  
AAATTTTGTCTCAATATATGGAGTCTGTATCCAAATATCTTACTGCGGTGAATACTGAAATGATCACCAT  
GGCAAGAGCTGTTAAAGGAAGTTAATAAAATAAGAGATGGGTATGCGCAGATTTGGATGTATTTAAAGAA  
GATTTTGCATTGTTGTTTGAAGCAGGAATGGTTGCTATCAAACAAGGGATGAAGCAAGCGCTAAAGCGT  
TATTTCAAGCATTACAAGTATTGGATCCTGAGCATAACAGCACATGAGTTAGGATCAGGATGTTGTCATTT  
GCATAAATGGAGCTCACAAAAGCAGAAGTTTTATTCCTGCTATTGTTGAAAAAGATCCCGAAGATTTG  
AGTGCTAAGGCATTTTTATCACTCACACTTATGATGATCGTTCTTTCAGCAAGGAAGTTCTTTTCGAAGTGC  
GTAGAGAAGTTTGGAGCGCTGCTTACAGTTAGCTGATCAGGTATTAGAAAGTTGTGAAGTAGAGTCTAC  
AAGAGCTTTAGCTAAGTCTGTTCTGGATGGCATGATGGATAGTTGCTAAAAGTGGTGGGCCTTTAAAT  
TAGGGAAAAGTGGGGTATTCATGATAGATCCCTCTTAAGCTTTTCCAAATTTTGTGAGGGGATAGGAG  
AGTGCTGCGGTGAATAAACCTTCAGCATCTCCTATGCCAGCGAATAAGTAAATAATGTTGCCTCATCTCT  
CTTTAGGGGGTGGAGGTGCTGCGTTGGATTCGACAGTGTCCACAGAAAAGCTATCGTTGATGGCTATGAT  
GCAGGATAAAAATTCGAGTTGATCGATCCTGAGTTGGAGGAAGCTCTGAACTTGAAAGTTACAAGAG  
CAGATCCATTTGTTAAAAGTCTGTTTGTGGGATGCACAAACGCAGATGCAATGCAAGATCCCGACAAGT

TGGCCTCTGAGCATGTAGATGCTTTAGGAGTCATTGTTGATTTAATCAATGGGGATTTTCAAGCGATAGC  
TGAACATACACAACAGACGGTCAAGCAGGGTAAATGGTGACGAAGAAAATCTGTTACACGCAAGATAGTC  
GATTGGGTCTCTCAGGAGAAGAAATTTTGAATCGTGCTTTGTTGTATTTCTCCGATCGTAATGGAGAAA  
GAGAAACATTAGCCGATTTCTTAAAAGTTCAGTATGCCGTTCAAAGAGCTACACAACGCGCCGAGTTATT  
TGCCAGTATTCAGGTGCCACGGTGAAGTGTAAAACGATTATGACAACCCAGTTAGGTAAACATGGA  
AGAGATAACGACCAGTTTAATACGTCATGACGGAATTGCCGGACGTGCAATTAACCGCAGTTGTGGGA  
CGTATTATCGAAGTTGTGCGGGATGTTAATCAAGGCTGTTGTTCCGGATGTTTCGTGTCGGTGAAGTGTGCT  
TGGTGAACGTCACGGGATGGAGCCTCTAGTTACAGAGGTAGTCGGTTTTACGCAGAATTTTGTCTTCCCT  
TTCTCCTTTAGGGGAGTTGACAGGAGTGAGTCCCTTTCGGAAGTGATGGCTACTGGATGGCATTGCAT  
ATCCGAGCAGGAGAAAGGTATTGGGTCTGTATTAAATGGTTTAGGAAATCCATTGATACAGAGACAA  
AGGGACCTTTAGAAGTGTGATGCCATTTATCCAAATTTTAAAGCTCCACCAGGATCCGTTGCATCGAGC  
TAAATTGCGTACGATCTTGTCTACAGGCGTGCCTGTATTGATGGATGCTCACTGTAGCTAAAGGGCAG  
AGAATCGGAATTTTTGCAGGAGCCGGGTGGTAAGTCTCTTTATTGGGCATGATTGCTCGTAATGCTG  
AAGAAGCAGACATTAACGTAATTGCTTTGATTGGAGAGCGGGACGAGAGGTTCCGAGTTTCATAGAAAA  
TGACCTTGGTGAAGAGGGAATGAAACGTTCCATTATTGTGGTCTCTACTTCTGATCAGTCGTCTCAGCTG  
CGACTCAATGCTGCCCTACGTAGGAACGCGATAGCAGGAATATTTCCGAGATCAAGGTAAAACGGTTGTAT  
TGATGATGGACTCAGTAACACGTTTTGCGCGAGCTTTACGTGAAGTGGGTTAGCGGCTGGAGAGCCTCC  
TGCTCGTGTGGGTACACGCCTTCTGTATTTCCACTTTGCCTAAACTGTTAGAAAGAGCAGGAGCCTCT  
GATAAAGGAACGATTACAGCATTTTATACTGTGTTAGTGGCCGGGATGATATGAACGAGCCGGTAGCGG  
ACGAGGTGAAATCCATTTTAGACGGGCATATTGTTCTTTCTAATGCATTAGCGCAAGCATATCATTATCC  
AGCGATTGATGTGTGGCTTCTATTAGCCGATTGCTGACAGCTATTGTTCTGAGGAACAACGTCGAAT  
ATTGGGCGTGTAGAGAGTTTTAGCTAAATATAAAGCTAATGAGATGTTGATTCTGATTGGGAATATC  
GTCGAAGGATCGGATCGTGAAGTCGATTTTCGCAATCGATCATATCGATAAATTAATCGATTCTTAAACA  
AGACATTCATGAAAAACAAATTATGAGGAAGCTGCTCAACAGTTGCGAGCAATATTCGGTAAGTCTGG  
AAAATAGTAGGATGTTGTGGTTAGATATCCTTTAGAACCCTGCTTATCTATTAAGAAGGATCGTGTAGAC  
AGAGCAGAGAAGGTTGTTAAGGAGAAACGCGACTTTTAGAGTTAGAACAAGAGAAAATTGCGTGAACGCG  
AATCGGAGCGTGATAAAGTTAAGAATCACTATATGCAGAAAATTCGCCAGCTCCGCGAGCAATTAGATGA  
CGAACAACCAGCGATGCGATTCTTAAAATGAAAGCGTATATCAAAGTAGTTGCGATACAGCTTTCTGAA  
GAAGAAGAAAAGGTCAATAAGCAGAAAGAAAATGTGCTGGCAGCAGCAAAGGAGCTGGAAAGGGCTGAAG  
TAGAGCTGACCAAACGACGTAAGAAGAAGAAAAAACTCGACTGCATAAAGAAGAATGGATGAAAGAAGC  
TCTGAAAGAAGAGGCTCGCCAGGAAGAAAAGAGCAAGATGAGATGGGGCAGTTGCTTCATCAATTACTT  
AAGCAAAAACAACGGGAATCTGGGGAGAACTAATTTATGGAATTAATAAAACTTCGGAATCTTTGTTTTA  
GTGCAAAGATTGATCATAATCATCCACGTACAGAGGCTCATGAGCCTAGAGATCAAAGAGAAGTCCGAGT  
GTTCTCTTTAGAAGGAAGATCTTCGACTAGACAAGAGAAAGCAGATCGGATGCCAGGAAGAACCTCGTCA  
CGACAAAGTCTTCTAAAAGCTCTGAAGAGGGTCTGTTTATGAGTACAGCAGGCGTCTCTCTAAAG  
AAGAAGAAGAGAGCAAAGGAGACGGATCTTCACTGGTGGCAATCTTACATCCGGAATGGCATTAGTTGA  
AATCTCTATGGCTGTAGTGAGCGAAGCTATGATGGAACGAGTACGATGACGGTAAGTCAGGTAGATCTA  
CAATGGGTAGAGCAATTGGTAACATCTACTGTAAGATCCCTGTAGTCCCGATATCGATGGCAAGCAGT  
TAGTAGAAATTGTATTGGATAATAGCAATACAGTACCTGCAGCTTTCTGTGGAGCTAACCTGACTCTGGT  
ACAAACAGGGGAAGAAATTTCCGTTCTTTTGAATTTTGTAGACCAAGCTCAGCTTACAGAAGCTACA  
CAACTCTGACAGCAAGATCCTAAGCAGCTAGTCTCATTGGTGAGTCTTTGAAAGCTCGTCAGTTAAATC  
TTACAGAGTTGGTTGTAGGGAATGTAGCTGTTAGTTTGCCTACGATTGAAAAAATAGAACTCTTTGCA  
TATGATTGCTGCAACTATTCGGCATCATGACCAAGAAGGAGATCAAGAAGGCGAAGGTCGTCAAGATCAA  
CATCAAGGCCAGCATCAAGAGAAGAAAGTAGAAGAAGCTCATATATAAGGATATCCCATGGCAGTTGCAG  
CAGAGCCTAGTAGTAATTGGTTAAAAGCTAGAGACGAGTTACTAAGTTCTTTGCAAGAACAGAAGGAAG  
AATGTTTTCTTTCTGTTTTTCCAAAGCAGGAGTGTGAGCAGAACTCAAAGATAAATCCCATATGGAA  
GAAGTGAATGTGCATTTGAGTCTCGAGGGCTTCTGTCTGTTGCAGCTGCTGTACAGGAATATGGGGAGC  
GTATTTGCTCCAACCGTTTTTAGCAAACCCCTTTGAATCTGGGGGAATTTTACATAGTTTCTTCCGGAAGA  
AGATTTGCAAGCTCTAATAGGAACGATTTTAAATGATAGTTCCCTTAGCTTCTTACTTCTACGAAAAAGAT  
CGTTTATTAAGATTTCAATTATTATTTGTTGCGAGAGATCTGCAAGCTGCTTCAAGAAAGTCCTTGGATTC  
CTTCTATGTCTGTAAAAGTAACAGGAGATGTTGCTTTTTCTGCGCGTGCTTTGGAGGGAAGATCATGT  
GATCCAAAGTCTCTTGTGTTTAGATGGATCTTGTATACGGTTTTCTATCTTAGTGCCGAAACTACAGCG  
CAGAGCGCCTGTAGATTC TTAGAAGAGAAGATCAGGCTTTTGATATGCAAAAAGTCGATTTGCAAACCC

CAATTACTCTCGCTGTAGAAGTAGGCTTTTGTCAAATTTTCAGAAGAAGATTGGCACCAGGTTGTTCTCG  
TAGTTTTATTTTGTAGATGCTTGTCTGTATGATCCAGATACAGGAGATGCTGGTGTCTTTCTTGTCCATT  
CAACGGACCCGTTTTTTTTGGTGGACGGTTTTTAGATAAGCAGTCGGGATCTTTTAAAATTACAGGATGTC  
AAGAGATGCAACCAGAAGAGGCGCCTGAAGAACCTAGTGAAGGAGTCCGGCAACTCCTTTGCCTTCGGC  
AACAAAAATCGTTGCTGAAGTAGCTCGCTATTCCTTTCCGTTGGA GAATTTTTGAACTAGGACCTGGC  
AGTGTATTGCAATTCGATGGTGTACATCCAACCTTTAGGCGTAGATATTATTCCTGAATGGAGCTAAGGTAG  
GGCGTGGTAACATCATTTGCTTTGCAAGATGTTCTAGGGATTTCGAGTTTTAGAAGTATAAGCCTTTTAGTA  
ATAGA GAGTCCTCTGTCAATTCCTACGTGA GAATGTTTTGCTTGCCGCTATTTACAAGCGGCAAGGACCTA  
GCAAAATGCTAGAGGTATCGAGTCTGAAAGCATGTCACACCGTAAGTTTTTATGCTCAGATCGGGTGT  
ATCCTTCTCCTCCTAAGACGAACTATCTCCTAACACGGGAGCTCAGTCGTAAGGTA GGGTTGACTGTC  
TATCAAGGTGTGGATGAGCACTCTCTCGTCCTGTTGTTATTTAAAACATTGGTATCGCCAGGAATTCATG  
ATCGACGTTTTCTTCGTGCTTTGGAAGAAGAAGCAA GGTATATGCAGCTAGTAACGCACCCAGCGTTTTGT  
TCGCTTGGAGGATAGAGGA GAGTGTGAGCAGGGACGCTACTTGGTTTCGGAATACATTTTAGG GAGTCT  
CTGCGAGATAGTATTCCTTCATCGCAAATCTCTTTGGATAAAGCGATTTCTATTGCTTTGCAAGTAGCGC  
AAGCTATCACGACTCTGCATCGGCATGGGGTTTTACATCTCGATATCAAACCAGAAAATATCGTGTCTCTC  
GCAATCAGGCGAGATCAAGCTCATTGACTATGGGCTTTCCGCTTGGCAATTC AATCATTGGGGATCTCCA  
GCATATATGAGTCTTGAGCAGAGCAGACAGGAACCGCCCTCTCCGGCATCCGATGTGTATTCCTTAGCTT  
TGTTGGCCTATGAACTGATCATGGGGCAGCTTGCATTTAGGAAAAGGTATATGTATCGTTACTGCCCTTCTAA  
GATCAGCAAAATTTAATACAGGCATTACAGCCATCACCGGCAGCAGCTTTTCCATCCATGCAA GAGTTTT  
GCAGAAGCTTTACAAGATTACTTATTGCACGATGTACATGAGGATATATCGTAAGAAAGACCATGTTGTTG  
CACAGATAGAACAGTGGCACAATCAGAGAGCGTGGCTATCTCCAGAAAAGTTATCTGCTCCGGAAGAGAT  
CTGTGTTTCATATTTACTCACAAAAGAGCCCTGTTATTTACATAATATTTACTATGATATGCTTACATCT  
GGAAACGTAGCAGAATTTTTGGTTCTGCTACGCTCCAGGAACTGTAGTTTTGCGCTTAGCATGATGAAAC  
AGTTTCTTAATCAACGAGAGGAGAAAAGCAAAGATATTC A AACAGTAATCAAAGTATGGATACTCTGTG  
CAAACCATGCATATCCCTATTTGTAAAGAAGGGATTTCTTGTGCTGTTTTTATATTTTTCTAGAAAGAA  
CTCATGTGCTTTTCTTGTGGGAAAACGTGATTTCTCGTTAAAAAGCAAACAGGGGGGGTGC AACGATTTCT  
AAGCGGAATCGCAAGGAATGGGGAGGAACTCCCTAGAGATCCACGAACAGTCCTTTTTGTGGGAGCC  
TGGAGATGAGCTTATCGTACACACCCCAAAGCTAGAGATTTGGTATATTTATATTTGCCCTTCTTTCTG  
AAGTTGCAAGATAGAGGGCAAATAGATATATTCGCGAAACAGATAACCTGCAGAAGGGAAT AAGGCAGA  
AGTATGACAGAAGTCTTTATCCCTCAACACTTATCAGCTTAAAAAGAGTCCGGTGAACATAGTGACGTCG  
AACATAGGAAGCAAGATTTTTAAGAATCATTCAAATAACAAGAAATTAGGCCTTGTCTGCGTTAGTTG  
TTCTAGATGCGGCGTTGTTAAGTGTGAATTCACGATCTGGCGAAGGCTTAATAGGCCAGTCCGCTTCTTT  
GCCGAATTATCATGAGGCAGAACAGCAGATCGCTGCTTGCCCTAAAAATATTGCTAA GAATTTAGCAAAG  
AAAAGCTCTCCAGGGGCTAAACCTACAGTAGGAGCTCCCTCTCCTGCACGGCCAGTTTCTGTAAAGGCAG  
CTCCTGCAAAGCCACAAGCTCCTGTGCGCAAAACACGGCATTTTAAAAAGAGCCATCAGATTTCTCTCC  
TAATTTTACGCAGTCTTCCCAACAGGTGAATAAATTGAGGAAAGAAGACGTCCTTTGGAGTCTCGATAC  
TTACAAGGCGCGGCTAAGCAGGCAGCTGCTGCAAAGGAAAAAAGGCTCTTGAACAGGAGGTATCCAAAC  
AAGAAGAAGAAGCTTCTAAACTCTGGGAAGAGAAAACA GAGTTATGCTCGTCTGCTGTGAATGCCATCAA  
TTTCAGTGTAAAGAAAGCAAATAGAAGAGCAACAGAAAACCATTTCCAATCCAGGAAATGACCAGACTCTT  
CCTGGGAAGAAAGATCCACATACATCCGGAGAACCTGTTATCCAAACGGTACAAGACTGTTCTCAGGATC  
AAGAAGAAGAGAAAAAAGTTCTAGAGCGATTAAACAAACGTTCTCTGACGTGTCA GGATCTTAAAGAAGT  
CGGATATACTGTCAATTTTGGAGACATTTCTATCTTAGAACTGCTCCAGTTTGTGAGCAAGATCTCAGGA  
ACGAATTTTCGTTTTTGATAGCAATGACTTGCAATTC AATGTCACTATCGTTTCTCACGATCCACTTCCG  
TAGATGATTTAGCAACGATTCCTGTTGCAAGTCTTGAAAATGCATGACTTGAAAGTCGTTGAACAAGGAAA  
TAACGTATTGATCTACCGCAATCCGAAGCTTTCCAAGCTTTCCACGGTAGTCACAGATGGATCAGCAAAA  
GATACTTGTGAAGCTGTAGTAGTTACAC GAGTATTTTCGTTTGTACAGCGTCAGTCCTTCTGCTGCGGTAG  
GCATATTC AACCCTGCTCTCTCATGATGCAATTATTAGTGCTTCCGAGTCTACGAGACACATTTATCGT  
ATCAGATATAGCAGGAAATATTGAGAAAGTCCGGGAGTTATTGCAAGCATTGGATAGCCCAGGCACCCT  
ATTGACATGTGCGGAATATGATGTGCAGTTTGCAAAATCCCGCTGCTTTGGTACAGCTATTGTCA GGATGTT  
TCGGTGCCATGGCTGAGGAAGAGGCTTTTCAAATTTTTATTCAGCCTGGGACCAATAAAATTTTTGTTAT  
TTCTCGCCACGATTAACAGCAAAAGACAATTC AATTTATTGGAGTCTTGGACATTCAGAAATGGCACAT  
ACGTTAGACGATGTCACAAGTCTGCTGCTTTGGGAAGCTCTGGAGCTGCTAATCCATAAGAGTTTTGC  
GCTTCTTCATGTACAAATTAATAATCAAATGGGGCAGCTATCGCTCAGGCGATTC AAGATATTGGATA

CAATCTCTACGTGACAACAGCAATGGATGAGGATTTTCATCAACACATTGAATAGTATTTCAATGGTTGCC  
GTAAACAATCCATCGTTGTCATTGGAAATCAAGCTAACGTCGATAAGGTCGTTAGCTTGCTAAATGGGT  
TGGACCTCCCTCCAAAACAAGTGTACATTGAAGTATTGATTCAGAGACAAGCTTAGAGAAGTCTTGGGA  
CTTCGGAGTACAATGGGCAGCTCTTGGAGATGAACAAGGGAAGGTGGCATATGCTTCCGGATTGTTGAGT  
AATACAGGATTAACGGATCCCTCCGTAATCAATCTCTGCCTGTAGCACCTAACCCAGGAAATATCTCAT  
TGCCAACACCTGGTCAGTTAGCAGGGATCAGTGATATGATGTACGGATCCCTCTGCATTCGGACTAGGAAT  
TATTGGAAACGTTCTCAGCCATAATGGAAATCGTATTTAACATTAGGGGGGTATTGAGCGCCCTAGAT  
CAAGATGGCGATACCACAGTGGTACTTAACCCTAGAATATGGCGCAAGATACACAACAGGCATCGTTCT  
TTGTAGGACAGACGATTCGTTCCAGACTACGAGTACGGTGATTCAGGAAACC GGATCTGTTACACAAAA  
TATTGAATACGAAGATATCGGAGTCAATCTTGTGTAACCTTCGACAATAGCTCCTAATAATGTAGTCACT  
TTACAGATAGAGCAAACGATTTCTGAGTTACATTCGGCGCAAGGTGTGCTGACTCCTGTAACAGATAAAA  
CATTTGCAGCTACGAGACTACAAGTTCCGGATGGATGTTTCTCGTTATGAGTGGGCATATTCGTGACAA  
ACTGACAAAAATTGTATCCGGAGTCCGTTACTCAGTTCTCTTCTCTGATCAAAGGACTCTTTAGTCGG  
TCTATCGATCAGCGTCAGAAACGAAATATTATGATTTTCATTAAGCCGAAAGTCATCAGTAGCTTCGAGG  
AAGGAACAGCGTTATCAAACACAGAA GGATATCGTTATAACTGGGAAAGCGAAAAGGGATCTTTAGAGGT  
AGCCCCCTCGTCACGCCCTGAATGCCAGCATATTCCTAAGGTCCAAGCAGAAAAGTAATTTTAAAAATGCTG  
GAAATAGAAGCGGAATAAATGTTATAAGAGTTGCAAGTTGGTATTC TAACGCCATGGAATAGCTTCTGACT  
CTAGTGTGTTGTACACAGGGGGGAAGTCAAGATGGACTGGAGTTAGCCGTATCTCCGTTCTCTTGGCTTT  
TTATGGAGTTAGCCTAAATAGCTCAGTTGGTAGAGCAACGCATTCGTAACGCGTAGGTCGTCGGTTCGAT  
CCCGCTTTGGGCATTCCTAGGCAGAGTAATTCGATTAGGGTAGTCGCTTAGATATTTTACATACAGGC  
CGTCAATATCTAGGTTGAAGGAGGCAAGTAACCATTCCTTCGTCCTCTCTCAGATTCGAATAATCAGT  
CGCTCTGCCTGGGTTTTGTGCTTGGCCGGATCTGGGCGATCATTCTTTTCAATGCTTCTATTCG  
CAGTATCTTGGTTATACAGAGCAAGGTGACCTCTGCGTAGATCCAGAATAAAGGATTCATAAAAGGTG  
GTTTTCACTATCTTCAATCCACTGCATACTCATTCCTAATTGTATCCAGCTAGTGGCATCCAATGCCTCT  
TGCAAATCTAAACAACAAGAATGTGTGAGCATCCACACAGAACGTAAAATGCGATTTTTTATTTCTGTAG  
GATTTTCTTTTACAAGCTGGTTTCTAGCCTCTTCTCAGCAGATAAAAATTTTCGACACTACTAGTCTTAA  
TGAAGATAGGATCTGCTCTTCTGATAGCCCTAAGGAACAAATATTGGACAAGCACAAGATATCTCCTAAT  
GATTC TTGTGATAACGGCAGTAAAGAAGAGCTAGCGAACTCAGTTGATAGGGAAC TAAAAGCTCAGATA  
ACGCATCTCCATACTTAAGAGCCGGAACATGAACAAAGGCTCGCGCTATCAGCGCTGTTCCACAACGTAG  
GGGATCAGCGGTTAAAAATCCAAAATCTGAAGAAAAAGCAAAAAGACAGAGACTGTTGTAACGTATATCT  
AAATCGATCAGCTTCTGAGTAATACTTCCGGCTGCCATACAAAATCTACGCCATGGATCACTACGTGGT  
CACGTAGATTAATGCCCTGCTAACACGTGCCTGCCTGATTTACAATTAGAGCCTCACCTTCCAAACA ACT  
CCCTAAATGATATGGAACAAATAATGTTCTAATAAACATTCCTCGTTGCCAGATAGGCAAATCTTTAAG  
GGTAAAACAAA GAATTCCTCACCTTCGATAGCCGAAAAC TGGTTGGCTATAGTCTTAACACATCAGTT  
TGTTTCTTTAGAAAGACAGGGAACGAATTTGGAAACAGAAAGATTTCTAGATAAAGAGAGCGTGCAAT  
AGGGCGTGGCGTCTGTTCTCAA GAATGCTTGATCGTTGCGATAGCAGTAA GAATATGATTAGGGAGC  
ATCGGTAGTATTCGATTTTTTAGCTGATTAATCTGATCACGGATCTCTGCTGCTGTTTATAGTCTTCG  
CGGCGAGAGTCTCTGTAAGCCTCGTGTAAAGCAATAAGGCGCATAGCTGGGTGATGATTGGTTGTT  
CGGAATTC CCAAACCTCGACCAATATGAAAGTTATTTGCTTCTCTGATGTATAGGATGAAATCGCCTG  
ATAACGCAGGAGCCTGGATAGGATAAGGGATTTAAAAGTGCATAGCATAGATGACAGCCTAATAGGAGC  
TCATCCGTATCACGGATACACCATTTCTGTTTTACAATTACCGACTCTAGAATGAGCGCTTCATGAGTAG  
GGGAGGCTAGAATCGTCTCGGATCGTAATAGCGAGAGGGATATGGACAAC TGTACATAACATACG  
AGAGGTAATGTTTTCAGAAATTTCTGTAACAGATAGTGGCGGGTGTGACAATTTATAGCAAAGAGCA  
GGAGACTCTTCTGTATGATCCATATCGAAAGCCGTGCAGATACAACGAGGACTTTTACGCAATAACAGAA  
AAAAACAAAGGAAGGAAATCTTTTTGATGAGGAGGGAAGATCTCTTAGAGAAAGAAATGGGTCTTGAAG  
ATTCGAACCTTCGACCTCTCATTAAAAGTGAGATGCTCTAACCGCTGAGCTAAAAGACCCGCATTTCTTT  
TTGTAATGACCCCAAGGGGATTCGAACCCCTGTTACCGGAATGAAAATCCGATGTCCTGGGCCAGGCTAG  
ACGATGGGGCCAGGACGGGTCTAATGTTATCACTAAACCCTTTTTTCTGCAACTCTTTCTGTTCTCTAA  
CGCATTTATTTTTAGAGAATAGGGAAGTTGCACAGAAGCATAACTACCCGTAGCTAACTCTGCTTCTTT  
TTGTTTTGCAAGCTCTTCTATTTGCTTACAAAATCTATCTGTGAGCTCTTGAATTTTCTTCTCTAAGCTT  
TTCACAGCATCCCTCTGTTAGGTTGTCATCCTTTTTTCAGCCTATCATTAAGGTCGGTCAATATTACGAA  
TAGCAACCTTCGCTTCTTCGCTCTTGCCTTCAGCTGCTTAATTACTTCTCGTCCGTATTCCTCCGTAGG  
CTCCGGTACGTTAATCCGAACCGTGGCTCCTTCAACTATAGGTTGTAGGTTTAAATTTGCTGCCAAAATT



CCTTTGAAATCGCAGAAACCGTCCCTGCATCGTAAGGGGAGATTAAAAGTTGTCGCATATCAGACACGC  
TAATCGATGCAATGTCTGATAGTCGCATGGTTGTCCTGATACCTCAACAGTAACCGTTTCTACCAACGC  
TGGGTGCGCCTTTCCAGTTCTGAAACCACGGGTCTCTTTCTGAAAAACGTTAACACTCCGGCCATCTCT  
TTCTCCGAGAAGCTAGTGTATAATTGTCCTCCTCCGAGAAGATATCACTGTACCAACAGTATTTAA  
GACTGCCTCCTCTAAA GAATGTCTAGCAAAGCTAAACATCTTTATGGG GATTCTGCTTCCATACACAAA  
GATATGGCAGCC GGATCGATCGCTCCCAATCC TTGGGAGAGAAAAGTCTCTGTAAGAAATATGATCGTACC  
TTACTGCATCAGCGCATTCACGAGGATCTTGGTCATAC ACCCATCCACGTGCATAGTCGCTTTTAGTAA  
AACATCGACCTTTAATTCACAGGCTCGCAAAGCTGCACCTGTGTCCGTTGTTAGATAAGGAGCTCCTGCT  
CCCATGGTGCATATCACAACCTTT ACCCTGGCTTAGGGCGTCAGATGCTTTCTGC GGATATATAACTCTG  
CTAACTGTGGGCATGACAAAGTCGATGTCAATAAAATGGGCACATCC TCAGTCTTCAAAGCATCCGCTAA  
CGCCATTC CATTAATTAATGTGCGTAACTTC CCATCTGATCAGCCGAA ACCCGATTAACTGTCAGGCTC  
TGGCTTTGTGAGAGACCGCGGAGGATATTGCCCCACCATTACCACCGCGACCTCAACATCTGCATTGC  
GGACGACTTTTAAATTC CGCAATCAATCGGGAGAGTCTTTCTTACTAATTTTGTACTAGAATCTCCATC  
AGAAAGAGCCTCTCCAGAGATCTTGAATAAAACCTCGTTTACTCGTTTTTTCATCATCTCGCCATTTGGT  
TATGCGCCCATTTTCCAGAAGACAAAAGTGTCAACTCTGAGTGGCTCACCCTAGCTTTTGCAGCTCTAT  
CAATCAGACCTTGAATGTGACTTCA GGGTCTTTAATGAAGGCTTGTCTAATAAAACAAGCCTCTTGAA  
AAAGGCTTTAAATTTCCCTT GAGTAAATTTCTCAACTACTTCTTG GGGTTTCCAGCCACTTGGAAGAA  
AATACTTCTCGTTCTCTTTCTAGAATTTCTTGAGGAACGCTTTCTTACTTAAGAAGTGTGGCTGACTTG  
CGACAATATGCATAGCAATGTCTTTAGCCAAAGCCTCTTGATTC TCAGACCCAGAAAGGAAAACCTATAGC  
CACAGCTTTTCCATTTCCATGAGAATAAATCCCTACACTTTGACCA GAGTTAACAGGCGTGTAGAAAGCT  
CGGCTAATGC GGATATTCCTCCAACCGTTTGCATCGTGACAGCTTTAAGCTCTTCCACAGATAAGGAAG  
GCTCTTGAGAGGACATTACGCGAGCTAAAGCTTCAACATCGCTAAGCTTGTGGTCAAGAAGATCGGACAA  
TAAACTCTGTAAC GAATGCTCGGAAAACACTGTTGTTAGCAACAAAATCAGTTTCAACGTTGACTTCAACA  
AGTGCTGCACCACGTTTCATCAACTCTGTGCAGCAATCACGCCTCTTTTGTTCGCTGCTCTTTTTTGC  
CTGCAGAGGCAAGACCAAGCTTACGTAATAAAACAACAGCATCTTCTAAATTT ACCCTTAGCATGCTCTAG  
AGCCTCTTTACATTTAGTCAGGCCCTACACCTGTCTGCTGTCTTAAATTTTTCAATGTTTCCATGGAGAAG  
TCGCTCATTTCAATGCCTCGCAATTTGCAATATCTGCCAGAGTAAA ACCCCCTCTTTAGAAGAAGCTTC  
ATCTTGAGCTTCTCCTGTTGGAAGAGGAAGCTCTTCAACAGCTTCTTCCGAGGCTTTTCTGCAGGACGC  
ACCGGAGATAAAAATTTGACGCCTAAACGTTTCTTGCATCAATAACAGCGTCTTTAAGTGTATTAACAA  
TCAGACGGATACTCTTAATGGAATCATCGTTGCAAG GAATAACGTGGTTGATTGGTGTGGGATCGAGTT  
TGTATCCACTAAAGCCATGACAGGAATGCCAAGTTTCCAGCTTCTGCAACAGCAATGCGCTCATAGCCC  
GGGTCAATTACAATCAGAAGCCCTGGGAGAGAGTTCATATGACGAACGCCTTCCAGTTGTTGAGCAATT  
TGCGATGTCTTTTGTCTAATAAAGCGAGCTCTTTTTCGTAAGACCA GAATTAGAAGCCTCAAGATCCAA  
TTCAATTCGTTTCAATGTCTTACAGAGTCTTCTAATGGTTGCCATGTTGGTCAACATGCCGCCAACCAT  
CTCTCTGAGGCAAA GAATTCGCCACATTCGATAGCAGCTTCTCTAATGATCTGTTTTGCTTGTTTTTTGT  
TTCCAACAACAAAATAGACCTCTCTGATCGATAGTTTTTTT GAATGCAAGAAACAGCCTTTTCAACTG  
ACCTAAAGTTTTAGCCAAGTCGATGATGTAAGGCCATTTTTTTCTTCAAAAATAAAGGCTTCATCTTG  
GGATTC CAGCGACTTGTCTGGTGTCCAAAATGTGCCCC GGATTC TAATAGTTCTTTTAAAGT GAGT TTGC  
AGGGAAGTTCCAAGCTTTGTTCCCTCTTTTTATGTGTTAACAAGGCATCTGAGAGACGCTCAGATTTCAGA  
CTTGGGAGTCATACAG GAGTAAAAAAGCGCCCGATCA GAATCGAACGACACCGGTAGCTTGAAGGCTA  
CAGCTCTACCATTGAGCTACGGGCGCGCTCAAGTAGACCGATATAGTATTGGAAAAGA GGGTTTTTATGC  
AATCTTCTTTTAGAGAAATTTTAGATTTTGTGGTAAGAGAGATAGGAGGGAGATCGAAAGTAAGAACAA  
AAATTTTTGCAAAAAAACTGG ACCCGACCGAAGTCGAGCCCAGAAACAC GGATAGTGTATTAACGTTA  
TTAACAAAGATAAACTTGCCAAAGTTTAAACAAAATATACAATTAATTAGAAGCG GAATTTGTGCATTTAC  
GTGAGCAGCTCTCTCATCGATCAAGC GAGTCTCAACTGTAAGTGCATTTTGTCTGCATCCACAATAGTT  
GTTCTTACTGCAATACCGCAAGATTTTCTAGATTTTCTTGTTCATTTGCAAGGAAACGATTTGCATGG  
TATCTCCGAGCTG ACCCTCTGCGCTAGCTTTACATCGCCAGCTCCAGCAATAGTT GGGTTCA GAGTGGT  
AACATCAAAGACAGTTGTAGCTGACTTCGGCTGAGCAATAC GAATCGTGTCTGCATCAAACTTGCTCGA  
GACCATTTA ACTCCAATGTAGGGAGTGAACATATTC AGTCTGTAAGAGAGAGCTAACTTGCTTGCCATT  
CATGGTAATCAATAGAGGCATCCTTAGTTCCCTGTACACCATCTGTTCCCTGCTTTAAGATCAAGAGGAA  
TTC TTGCCCTACATATCC TTTAGGCTTATTGATAGTAA ACTCAGCTGCGTTACAGAGAAGCTTTAATTCT  
TCGACTTTAGGCTT GGATGAGCGTATTGGAAAAGCGCCTAAAGTCGCGCATCCACATTC CCACAAG  
CTGCACGAGCTCCAGC ACTCCAAGCAAAGTAGTATCTGTATACA ACTCAACAACAGATTGATCTAAGCT

CATATTTGGTACAAGCTTACTATCTGAACTGTAGCATGGTTCTCATTATCTCCGAATAACCCAACTAAG  
TTGAAAGATGCTGAATTTCCCTTTAAGATATCCACTGGTGGCTCCTAATGTACAGAATACATCAAAACGAT  
CCCAAATATTC AATGCCATGTAAGCAGCATTTGTAAACATCTCAGCATCC TGCATATGTCGGCCGTAAGC  
AGGATTC TCTCTTGCTGTACAAGTGGATGGAGCTGCAGCATTGCCGTGTAGCAGTTGTAGGCTTGGC ACCC  
ATTTGGAATTC TTTATTCACATCTGTTTGCAAAACACGGTCGAAAACAAAGTCACCATAGTAAACCC ATAC  
GCATGCTGATAGCGTCACACCAAGTGGTGCAAGGATCGCAAAGGATCTCCGCCGAAACCTTCCCATAGAAT  
TC CGTCGATCATAAGGCTTGGTTCAGCAGGATTC CCCACAGGCAGAGCTTGCAAGGAGGAAGCAGAACTC  
AAAGCGGCAAACTAATACCGATTTCAAAGATTTTTTCATTC TTACCTCTAAATGTATAAATTAGCTCT  
CTTTGTGCTCGCTATCTTTTTCTGGCGGCACTGCGTCCTAGTTAAAGCCAGACAAGATGTCCTGTAGCAA  
TTAATGGCCTGAGGAATGTCTTGCAAGTAAAAGCAGCCTTAATCGAGAACATGTCGTTCAATGCTCGAGA  
CCATAACAAAATTTTCTTATTC TCGTAAAGTTGATAAGAAAAACGTTTCGTCGCCAGGAAGAAGCCCTTAAG  
CGCTCCTGATTTAGCGATAAAGCAGAGAGCCATTTTTGTATATCTTTTTATGTTTTATGTTCTTGGTTT  
TTGCGAAAAAATCGCTCTGAAACCAGAGCAAAAAGCCATGTTGGCAATATGTTGATTGTTGA GAATGAG  
AGGGTTTTGAGT TAATTACAAAACAGTTCAATTTTTTATGAGTTGTTAATTTCCAAAACCTAAGATTTTTG  
TGTTTGAATAGCTCGAAGATGGGGT TTTGGCTAAAAGAAAAGAGGAGATTTTTGTAAGAAAATCTAAGA  
AT TTTGTTTTGATAGAAATCGTTTTTATTACTACAAAAGAAAGTGTTTTTAAACGGTCGACCAATAAAAACA  
GATTAACCTAACCATATATGAAAAGAAAACGACGC ACCCACTTCTGTGCCAGAAAAGGCTAACAGACT  
ACTTGTGGGATTTATTATTGCTTTGTCTATCATCACTTTGCGTATATGGCATGTTGCTGTTGTGCAGCAT  
GAGAAAAAGAAGGAAGAAGCTTATCGTCTCAGCGTAGAAGTGTTCCTGAGCATTGTGATCGCGCAGGAG  
TATGTGATCGTTTTGGTAAAACGCTGGCAGAAAACGTTTTTACAATATAATGTGGGGATCTCTTATCGAGC  
GATACGTGATATTC CGACGCGTGTTTGGCATAACAGATGAGCAAGGGAATAAGAGGCTTGTTCCTGTTCTG  
AAGGATTACATTAATAAATTTGCAGATTTTTTTGGCTCAAGAGCTGCATATGGACCCTGATTTCTGTTGAAG  
ATACGATCCATGCCAAAGCTTCTGTATTAAGGCTGTGTACCTTACATCC TTCAGACTAATGTATCTGAGCG  
TACTTTTTTAAGGCTCAAGATGCTGGAGAAGGAT TGCCAGGATGTCATGTCGAATCTTCGGTTCGCAGA  
CATTATCC TGAAGGGCGCACAGTAGCTGATTTGTTGGGATATGTCGGACCTATTAGCGCAGAAGAACATA  
GAAAAATTACGAGGAGTTAGGAAACCTAAGAGAATGCATTCGTGCTTATGAAGAAGGTTAGGATCC TAA  
ATTTCTGCAGGAATATCGAGCGTCGATCAAGTACGCAAGCTTTTGCATGAGTTAGAGATGCATGCCAT  
GGAT TAAACTCCTTGATCGGCAAAATTAGGTGTAGAAGCTTTTTGTGATCGTAAATTAAGAGGTTGATAG  
GCAAGCGATCTATGCTGGTAGATCGAAGAGGGAAT TTTATTCAGGAGATGGAAGTTCTTCTGTTGGAAG  
CCCAGGTAGAACAATCCAGTTAACGATCTCTACAGAGCTACAAGCTTTTTGCTCATGAGCTCCTTGCAGAA  
CATGAGCGAGGTGAGGTGTTTACGATTATCGACAGTGGCGTCAGCAACAATATTGCCGCCCTTTTTTCC  
CTTGGATAAAAGCGGGGCGATTGTTGCTATGGATCC TAAGAATGGGCAAATTC TAGCGATGCCCTCTTC  
ACCACGTTATGACAATAATGACTTTATCAATATGAAAGACTCTCCTAATCAGGAGGAGTGTGCTCTTCT  
GTATGCGATGGCTGAAAACCTTGAGTACATCGGAGAAGTATTTGATAGACCGGTTCTTTACGAAGAG  
AGCGATTGGATCC TCTCAGTGGAAAATATTTGATGAAGAGCTCTTTTTTCGTATCGAGCTTTTTTAGA  
TTTTATTTGCCAGACAGTCTAAAGTTAAGCAGATGCTATGCGAGAAAGGTTCTATTGGGCTTCTATT  
TATCTGCAAGGAACGATCGAGCAGCTTTTGAAAATGTTT GAGTGTGAAGAAAAAGAGTGTGGTCTCGTTT  
TTGATGTTCTATTCCTTAAAGAAGGATGGGCATGAGATTATCGGAGAGGTCACATCTCTTAAACGACAGAA  
ACAGTTTAAAGCTATCC TTGCTGAAAGAGAAGAAGAGGTACAAGCTTTTCGCGAGCGTCTTGGCTCTATT  
TTTGCAGATCTATCTGCCAACTACGATAAAAATTC TATTTCTGGATCTATTGCGTACGGCAGTAGATCCAG  
AAAAAGTCTCTATCTCTTTATTAGCAGAAATTGGCCATATGTCTGTCTTGGATTTTGTAGATTATCAAGG  
GCATTTCAATGCTTTGCGGAAATCATTTGCTAAACTGATGGA GAATGCATTTATCGATCATGATTTTACC  
GCTTGGCGTGAAGAGCATTTCACACAGTTTATTAAGCAGAAACGCGATGAGGAGTGGAGAGGAAGCAAC  
GATACCCAAACCCCTTATGTGGAT TATTTAGTAGAAGAGCGGTCTCGGCAATATGCTCTTTTTTTGCCGAGA  
GCATATGGATTC TTTTATTACTTTTTTACTGTACAGAGATAGAGCCCTCTTGGTAATCCCTATTATCAG  
GAGATTGCTTGTGGCGCCAAGAACTACGTTCTGGCGCCTACCC TGCTTTAGAATGGCGAGAGCATTACG  
ATTTTTTACATAAGCATTGTGTCGAGACCTCTTATGATTTATGCGAACTGTTTGCAGCTTTTCGAGAGTT  
TTCTGAGCTTAAAGCTCCTCTATATGGACAATATCC ACTAACACTGACGCGGAACATAGAGCAAAATAGAG  
CAGGATCTGATCGCTCTTTTT ACCCATTTGATGGTTATGGGCATCTATCTGCTCATGCTTTTCGGTCAAG  
CAGCGACTTTAAGGTTCTATTTTTAAGTTAGTATCTGCTTATTC CGTTCTTGTGCAGCATCTTTCTGACCA  
AGAAGATTTATCTAAGTTATTGGTGATCGTAGATAAGCAATCTCTGGGGCTGCGTTCTGGGAAGCCTCAT  
GTTGGATTTTTTAAAGACGGCTCTCCTATTGCTTCTTTCTTTAAAGGAGGGATTC TGCCTGGGAATGATT  
ATTC TGGGAGAGGGTATATCGATCTGATCGCAGCTTTGGAGATGTCTAGCAATCCCTATTTTTCTCTTCT

CGTTAGTGAATATCTTTCTGATCC TGAAGATTTATGCGAGGCAGCTAAACTC TTCGGTTTTGGAGAAAA  
ACAGGGATAGGACTTCCTGGAGAATATGCTGGAA GAGTGCCTATCGATGTCGCATATAACCGTTCGGGT  
TATATGCGACTGCTATTGGGCAACATACATTAGTGGTGACTCCTTACAAACCGCAGTGATGATGGCGAC  
GTTAGTTAATGGAGGGATTGTCTATCAGCCGAGT TTGATACAAGGTGAGTGGTATCAAGGAAGTTTTTCT  
CCAGAACAAGCTAAGAAGAAAAGAGAAATTTTCTTGCCAGATTC GATCGTCGATCTATTTAAGAGAGGTA  
TGCATAACGTGATTTGGGTCAATACGGGACGACGCGGTTTCATGCGTCAACGGTTTGCTCCTGAACGATT  
GGCTCGTATTATTGGCAAACGAGCACAGCAGAAGTGATTGCGC GAGTAGGGT TAGATCGTGAGCGAGGA  
CGCATGAAATTGAAAACGCTGTGGTTCGCTGCGGTAGGATATGAAGATGAAGCGTTATCTCATCCGGATA  
TTGTTGTTGTTGTGTACTTACGGCTAGGAGAGT TTGGAAGGGATGCTGCGCCTATGGCAGTGCGTATGAT  
AGAGAAATGGGAAGAGATTCGTAAAAAATCTTTCAGCTAATTCGTGATTGGCATGGTTTTTTGCTCCTGTA  
AAAGGTAAGGTATTACTTTGACAGGGAACGACTATGGAAGAGGCGGAAAAGCATTTAGCGAAA GAGTTTT  
TGTGTT CAGGCATTAATTTATTTTT GAGTGGT GAGTACGAGCAAGCAGAAGAGAGATTGAAA GAGT CCTT  
AGAGT TAGACTC GGAAGCTGGGCTAGCCTATTGTTATCTGGGGAT TATTGCGTTAGAAAACAGGACGTACA  
GCTGAGGCTTTGGTTGGTGTAAAGCAA GGGT TAGAAGCTGAGCCTGGAGACAGCTATTTACGTTATTGTT  
ATGGCGTGGCTTTAGATAAAGCCGATCGCTTAGAAGAAGCGATCGGGCATTATCAAGTGTATGCA GAGTT  
ACATCC TGAAGATATA GAATGTTTTATTTAGTTTTAGG GAGTGCATATCATCGTTTATTGCGTTATGAAGAA  
GCGATTGCCTGTTTTGATCGAAT TCGCAGTTAGATCCATG GAATCC TCAAGGCTATAACAATAAAGCGG  
TCATTTTATCAGATATGGAGGATGAGGAAGGCGCTATTGATTTATTA GAATCTACGGTGAAGAGAAACCC  
TCTATATTGAAAAGCTTGGGT TAAATTAGGTTATTTACTTTCTAGAAAATAAGATTTGGGATCGTGCAACG  
GAAGCGTATGAGCGTGTGTGTCAGTTGCGTCTGATTTGTC GGATGGCATTACAATCTTGGGT TATGTT  
ATTTAACGCTAGATAAACGCGATTAGCATTGAAAAGCGTTTCAAGAATCTTTGCTGTTAAATGCAGAAGA  
TGCGGATGCGCATTTTTTATATA GGAT TAGCTCATAT GGATCTTAAGCAAATGAGCAGGCATATGATGCA  
TTTTATCGAGCTCTGGGGATCAATTTAGATCACGAACGTTGCGACTATTTATTGGATATTTACATCATA  
TGCAAGGC GAGTCTGAAAAGCAGAAAAGGAACCTTCTTTTTTTGGTTGCTAAA GAATCTGTGTTGCTCC  
TTTTGTTACAAAAAACCGTAAGCAGCTCGGTTTTTCT GAGTAAAAGGAGACATTATTTTGAACAAGCGAA  
CCC TTTTTTGCTTAGCAAT ACTC TCTCTGACCGTCTAGCGATTTTTTGATTTTTTATTTGTTGTGTGT  
AGAAAAATTCATTTTTTTTTACGATCCGTGGCCAACAAGTTTTTTTTCTTAAGGGCTGTTTGACAGTCCTT  
TCCTTGGGTCTAGGGAGAGACATCC TCTTTCCCTAGGCTGTCTTCTTTTTTTTTCAAAAAGGTGTTTCGAA  
AAAAATATCTCGAAT TGCAGTTCAGGATTTGTTTTGCTTTTTTTGAGACAGAGGAGATAATAGGCTCTTT  
TCTCACGAGCTCCACTC CAAATAGAGTGGCATCC TGATGAAAGAGGAGGATCATGGACGCACCGGTAGAT  
AAATTTCTGCAGCAGCAG GAATATCCCTATGGAT TTGTTACTC CGATACAGTCGGAAGGGT TAGCGCCAG  
GTATTAGTGAAGAACATATAGAGCAATTTGGTTTACGCGGCGAGCCTAAATTTTTATTAGATTTCCG  
GTTAAAAGCGTTTTGTTTTGTGGCAAAGATGGAAGAACCTACATGGGCTCGCCTGCGTTATCCACCTATC  
GCCTATGATGACATCGTCTATTTTTTCGGCCCCAAAACAAGAAACCCCTAGGGAAATTAGAAGACGCAG  
ATCCAGAAATTTTAGAGACATTTAAAAAATTTGGGCATCCCTATTGATGAGCAAAAAGGCTTCTCAATGT  
GCAGGATGTTGCTATGGATTTAGTGTGTTGATTCGTTTCCATAGGGACGACTTCAAAAAA ACTTTGGAA  
GATGCTGAGTCATTTCTGTTTCAATTCGGGAGGCAATCCACAATATCC TGATTTAGTGAAGCGCTATT  
TAGGATCCGTAGTGCCAGCTCGGGAT AATTTCTTCGCGGCATTAATTTCTGCAAGTGTTTAGTGACGGGT  
GTTGCTGTATATCCCTAAGGGAGT TTGCTGTCCGATGGAGATATCTACATATTTTGAATCAATGATAAA  
GAGTCCGGACAATTTGAGCGGACGCTCATCATTGCGGAAGATGACTCCTATGTCAGTTATTTAGAAAGGAT  
GTACAGCACCTTCTTCTCTTCGCATCAACTGCATGCCGCTGTTGTTGAGCTGGTAGCACATAACCGTTC  
GGTTATCCGCTACTCAACCGTACAAAATTTGGTATCC TGGAGATCGTAAGACGGGGAAGGGAGGCATTTAT  
AATTTGTTACCAAACGGGGAT TATGTGCAGGAGAGCATTC TAAAATTTCTGGTCTCAGGTGGAAGTGG  
GTGCTGCGATTACTTGGAAATACCCGAGTTGTATTC TAAAGGGAGAGAACAGTGTAGGTGAGTCTATTC  
TATAGCACTAACTAATGGGAAGATGCAGGCGGATACAGGAACAAAATGTTACATATTGGGAAAAGGCTCT  
TCATCTACCATTGTTCTAAGGGAATTTCTGCAGAA GAGTCTCACAACTTTCCGTAGTTTTGGTTTCGA  
TTTTCTCTCAGGCAGTGGGAAGTTGTAATTACACGCAGTGCGACTC TATGCTTGTGGAGAGCGCTGCGG  
GGCTTATACGGATCCACAATTTGTTGTAACAATGGAGA GAGTTGCGTGGAACATGAAGCTGCAACTTCT  
AAATTACGAGAAGATCAGTTGTTTTATCTTCGTAGTCGAGGATTC AATACGGAAGAAGCGGTTAGTTT  
TGGTACATGGTTTTCTGTAGGGAGGTTATAGAGCTATTACCTCTA GAGTTTTGCTCGGGAAGCAACCAAGTT  
ATTAATGATTAAGTTAGAAAATAGTGTAGGCTAGAAAATGCTTCATCTATGTGATGTACATGTATGTTGTG  
AAGAAAAAAGATCTTGGAAAGGCTATCTTTATCCATTCATCC TGGCGAGCTACATATTATTATGGGGCC  
AAACGGCGCAGGGAAATCCACTTTAGCTAAGGTGCTATCTGGAGATGA GAGTGTGAGGTGCTTCTGGG

ACAATGACGTTGGCTGGGCAGGATTTACTGGAGCTATCTCCAGAAGAGAGAGCTCATGCAGGGATGTTTA  
TTAGTTTTCAACATCC TCCGAAATTCCTGGGTGAACAACCGTATTTTTCTTAAAAGAAGCTTGTAATGC  
CTGCCGAAAAGCTCGCAATCAAGTGGTGTAGATGATGCTGCTTTTGAAGAGCTGCTTACGCATCTGGAA  
GAGGTATATGGATTC CCGGGATTTCATTTTTTTTCTAATAGGAATGTGAATGAA GGATTC TCCGGAGGAG  
AGAAAAAGAAAAACGAAC TTTGGCAGATGTTGGCTTTAGAGCCTAAGATGGTGGTCTGGATGAACCCGA  
CTCAGGTCTTGATGTCGATGCTTTGAAAGGGATTTGTTCTGTTTACAACGCTATCGTCAACAGCATCCT  
GAGACCGCTTTTTGTATCGTAACGCATAATCC TAGGTTAGGTGATCTCCTGCAGCCAGACCATGTACATA  
TTC TTTTGAATGGACGCGTTGTCTTTCCGGAGACATGCATCTTATGGAAGAGCTAGAAAGGAA GAGTTA  
TCAA GAAT TATTAGATGTCGTT ACCC AGGAGTAAACTATGTGGGGG ACTC ATCAGCAGAGACAGATTCAT  
CCCGATGCACGACTGGCAGACGTTACACGCTCTGTATGGCGTCAGTATCAACGCGATCACGTATTTTCGAG  
AAGCTTGCTCCTGGTTGAAGGAAATGACACAAGAAGATTC TTTGGATCTATTGTGTAGGAGGATGTGAGAT  
TGGAGCCATTTCTCCTGAAGAGAGATCC GCAACTTGTGTATTTGTAAT GGATGTTTTGCGCCTTCTTTA  
TCTGTATTGCCTGCAGAAATCATCGTGGCCCTTTACGCGAAGCGCGTGCTTTTTTTTTCAGAAGCACGATG  
AGGAAGATGTTGTAGAA GAGTTGC ATTC TTTACTTCGTGGAGAAGAAGGGACAGTTATCTATATTCCTGA  
AGGTAGAGAACTGCAAACACCTTTATTTGTACAGCATCACTATGTCGTGTAGCGAGGAAGAAAATAAGAAG  
ACGGTGAGCGTCCCTATATAGTTTTTTGTTTTAGGGAAGGGAGCTGCCATTTTCGATTGAAATGG GAATGT  
CTGCCCTACC GGAT AACGTATATCTTTTTTGAAAAACGCTCTGTTTCTTAGGCGAGGAAGCAGAGCTTGT  
TTTTGACCATGAAGCCGTTTCTAAAGGGACAGAAA GAATCATATGGGCTCATCATGTAGAAGTCGAACGA  
AGAGGGGCTTGCGCATTG ATCC AAGACATGCGTTCAATGGGGAAAGGCTGGTTCCG GAATAGCTTTTTTCT  
TGAAAGGAGAAGCTGCTCATGGA GAATCTCTAGTTAAGGTATTAGGTGGAGATTTTCTAGGTGTGCATAA  
CACGATGCATCATGATGACCAGAGACTACTTCGCGTCAAAT ATTC GCTCCATCTTGAAGAGGGGAGC  
TTCTCCTTTGAGGGAGGCATCTATATTAGTCTCGCGGGACGCTATCTAATGCTTATCAGAAGCACGAT A  
CCC TCTTATTAAGTAATCGAGCTTCTGC ATCC ACATTTCTCGGTTGGAGATTC TCACTGACGATGTTAA  
AGCTTCGCATGGAGCCACTGTGGGCTCTTTAAATGCGCACCTTTTGACCTATCTTCGATCTCGAGGATTT  
AGTTTAATAGAAGCCAAACAGGCTCTACAAAAGAGCTTTTTTGACGTTAGATATAGAGAAACCGTATTTCC  
CAAACCTGCAGAAACA GGATCTTTACCATGTATAATGTGAAAAAAGACTTCCCTATTTTTTAAGAAT CAGG  
GGGATCC TTATGTTTATTT GGATTC TGCAGCTACGACACATAAGCCTCAGTGTGTGATTG ACTC TATAGT  
GGAT TACTATAGTTCTTCATATGCGACTGTAAACCGAGCTCTTTACACAGCGTCTCATGATATCACCTTT  
GCACATTTGGCAAGTGCCTTCAAAGTAGGTTCTGGATCGGAGCGCAATATGACCAAGAAATCATTTTTTA  
CCAGGGAACTACATCTTCACTGAACCT ACTC GCTATTGCAGCTAACGATAGTTGGTTAGCTGGAGGGAC  
GGTTGTGATTTCTGAGGCGGAGCACCATGCTAATCTCGTATCATGGGA ACTC GCTTGTCAACGTTCCGGA  
GCTACCATAAAAAAAGTGCCTGTGGATGATGAAG GGATGGTAGATTGTAACCATCTCGAGCAACTATTA  
AACAAGGCGTACAGCTGGTAAGCTTAGCTCATGT GAGTAAATGTATCGGGGGCAGTTCTTCTTTGCCAGA  
AATTGCTCATTTAGTGCACCGTTACGAGGCTTTATTTGCTGTAGACGGAGCTCAAG GAGTTGGGAAAGGG  
CCTCTTAATCTTTCT GAATGGG GAGTGGATTTCTATGCTTTTCTGGTCATAAGCTGTATGCTCCTACTG  
GAAT TGGTGTCTATACGGCAAAAAAGAAC TTTTGAATCGCTTCTCCTGTTGAAGGAGGAGGCGATAT  
GGTGATCGTATATGATTTTGAAGAGCTGTCGTATCAAGAACCTCCGTTGCGTTTCGAGGCGGGG ACTC CA  
CATATTGCAGGAGTATTAGGAT TAGGTGCGGCGATTGATTATTTGCAGGCTCTTCTTTTTTCGATAACAG  
ATCGTTTAAACAGAGCTT ACTC ATTTCTTATACGAGCAGCTACTTACAGTTCCAGGT ATTC AGATCATTGG  
CCCTAAACAGGGAGCTGCACGAGGTTCTCTGTGTAGTATCAGT ATTC CTGGTGTGCAAGCTTC GGATTTA  
GGTTTTTTGTTAGACGGGAGAG GGATTTCCGTACGTTCTGGGCATCAGTGTTACAGCCAGCTATGGTGC  
GTTGGGATTTAGGACATGTTCTGCGAGCCTCTTTGGGTATCTATAATGATCAGCAAGAT ATTC TTCTTTT  
CGTAGAAGCTTTGAAAGATATTTTACGAGCATATCGTTTCGTAATGCGCTTCCGTTTTCAAGAGAGATGCG  
GAGTGGGCATCTCTGATTTGCATTATAAGATTTTGTATCTT GAGT TTTTGT ATTC TGAGGACTGTCTGT  
AGAATACAACGAAT TGGGCTGT GAAT TAGGAAAATATTGTGAGT AGATTACCTAGCGAAGATACACTTTT  
AGAAGTGAATATAGAGGAC ATCCGGGT CAGCCCTTTTCAACCTCGACGTACATTTCTTGAGGAAGATTTA  
AAAGAAT TAGTTCTTCTATCAAGACGGTAGGACTG ATTCATCC TCTGTAGTTAGGGAG ATCC GTAATG  
GGGAT AAGGTTTTGTATTAT GAGT TAATAGCTGGTGAGCGTCTGGCGCGCTTGAATTAGCAGGATA  
TAAAACGGTCCCTGTTGTTTTGAAGCAGGTGCTAGCTGATGATATGGCAGCAGAGGCGACTTTAATAGAA  
AAT ATCC AAAGGGT AAACCTGAA ACCC TTTAGAAATGGCAGAAGCTTTTTCGACGTTGATTGTTGTTTTG  
GTCTT ACCCAAGATAAGGTTGCTAAAAAAGTTGGGAAGAAGCGTTTCGACAGTAGCTAATTATCTGCGTTT  
GTTCTCTTCTTCAAGAGGTTCAAGAAAAAATGAACTCTGGAGAGATCTCTTTAGGGCATGCCAAAGTC  
ATCTTATCGTTGGAAGATGAAAATCTTAGACAG ATTC T GAGT CAGAAAATTATCTCTGCAAGTTAGCAG

TACGCGAGGCAGAGATGGAGGCTAAACGTCTAGTGAAAGGTAAAGGAGCTTCTTTGAAAGAAGACAGTTC  
TTCACAACCTTCTTCTCGACTAGGGTTTTGTCAAGAACGGTTAGCAACAACCTTTGGCTATCCTGTAACG  
GTAAAGCCTCAGGGAAGACGCATATGCGTATCATTTTTTGTAGAAGGAGAGGAAGCGTTAGAAGCTTTGG  
AAAAAGCTTTAACAACATCTTCTTCTGAAGCTATCTTAACTTAAAGGAACCTGCACGTCTCGGCGTCC  
CGGGAAATTCAGGTAATTGTGAATGGAGCAGCATTCGTGTGTAGGAATGCTGC GGAT TACAAAAGATTT  
TTCCGTAGCCCCAGTCTCTACGATCTGCCCTTTGTACATGATAATGAGTTCCGAACAAAATGAACGGACG  
ACTGCAAGATCATGGGAATAAATAAGTAGGTGAGTCGCGCTTGTGTGCTGTAACGAAGTTAGCATGTTCA  
GAATCTGTGCTTGCATAGATAGATCTAAAGCAGAAAATTTTCATCACAGATAATCAGTTGTGGGGCTCC  
TAACAAAGCTCTAGCAATAGAGATGCGTTGTAGCTGTCCCCAGATAACTGGTGTGGGTAA GAAT AAAGG  
TAATCTGTAGAGAGCCCCACCAGAGATAAAGCTTTTTTCTACTGTAGCACCAAGTTCTTCTTTAGAACTA  
AACGATGATAGAGTAGGGAATGACTTAACTGTGCGAAAATGGTTTTACGCGGATTTAA GGATGAGCGGG  
ATTC TGAACACCATCCGCACCTGAGAATAAGATATTGCCTTCTTTTTTATTATGTAGAGGGATGGCC  
TTGTCATTGAGTATCAGATGGCCAGAAGTTAATG GAATGAGCCCTGCAAGCCCCAGAGCTAAAGTAGTTT  
TCCCAGATCCAGACTC TCCTATGAGACCGATAATTTTATGTCTAGGAAGGCTAAAGGACACCTGATTTAA  
AGGCGTAGTAGCCACTTTTTTCTTCTGAAACCAGAAAAGATCGCTTGTAAATAATGTTTAGTCAAGCGGCTT  
GCTTGGAGGAGAAGA GGAT TATTC ATGTAACCAGCACCTCACACGATGATGATCATTTAAAGATAGGGAG  
TCCGG GGATTTTTCAAAGCAAATAGGCTGAGCTTTACGGCAACGAGGA GAATAGCAACAGCCCTTAGGAA  
GTCTTGTGTAATGAGGAGGCTGTCTGCAATAGGAACAAAGGCTGCTGTCTATATTTGTGAAGGACGAGA  
AGCTAAGAGATCTTCTGTATAA GGATGGGCAGGA GAATGAAAGATCTCTTGGACAGAA GAATATTC TGCC  
ATACGGCCTGCGTACAAAACAAAGACATCGTCAGCCATTTTCGGCAACGACTCCCATGTCATGAGTAATGA  
TTAAAAG ACTCATCC CAGTTTTTTTTTGTAAATGTTTTAAGCAGTTGTAGAATTTGATACTGCACAGAAAC  
ATCTAAAGCCGTTGTGGGTTCGCTGCTATTAATAAGTCTGGAGAGGTCAGCAAGGTCATAGCGATAGCC  
ATGCGCTGAAGCATTCCTCCAGATAACTCGTGAGGATACAATTTAATGCAACGCTCAGGATCTTGAATC  
CTGTTTTCTCGCAATACAGCTAACATTTGCTCATGAGCCATTTT ATTCGAAATTCCTAAGTGTGTGCGAAT  
GACTTCATGGAATGTTGTTCAATAGTAAAAACAGGATCAAAGGAAGCAAGAGGATTCGAAAAATCATA  
GAGATTTTTGATCCAAACAGGACTTTTCGATTTGTATTCCTACGATCGAGGAGATTCCTTTTATTA  
GAGCCTCTCCTGAAAGAGAAAAGCTCTCTTCCGGGAGAAGCTGCATAAGAGATTGTGCTGTAATGGATTT  
CCCTGACCC TGACTCCCAATAATAGCCAGAGTTTGGCCTGGGAAAACATCAAAGGACAAAAGAGTCCACA  
GCTAGAAATGATACAGATTTCTATTTAGAGATACAGAAAGATTTTTAACTTGCAGAAGCGGCTGAGCAC  
ACATAGCTATGTATCTCTACTATTTGAAGGGGACCTCGAGCGTGAAAAATCTTAGAAAAAACA  
TTTTGGTTCTTAGTACATTC TAGATTGCAATATATATATGAAGGAGGTATATTTGGGAGCATTTTTCT  
CAAAGACAATTA AAAAGGCTTATATGCAAGTCTTAGCAAGTTT ATTCGGTCAATCTCCTTTTCTCCAT  
TACAAGCACATTTA GAATTAGTTTCTTCGACTATCAATGTTCTTTCCACTTTTCAGCGCTCTTAAAGA  
AGGCGATTATGAAA GGGTGGGGT GTTGGCTCAGCTCGTTTCTCAAAGAACGGCAAGCTGATGGTATG  
AAAAACGATGTAAGAAGACACTTGGCTTCGGGAGTATTTCTTCTGTATCGCGCGCAGCGCTGTGGAGA  
TCATTTGATACAAGATTCCTTAGCAGATTGTGCTGAGGATATCGCAATTTTGTGACAGTGAAGAGCT  
GCAGTTTT ATCCGAATTTGAGGAGTGTTCCTTCGAGTTCTGCAAAAGACTGTGCAATCTTTCGAAGCT  
GTTGCGAAAAC TATACGAGAGATGGATCGCCTTTTGAATCTTCTTTCGGTGGAAATCGGGCAGACAAA  
CTC GTGTTTTAGT GAGTGAAGTATCTAACCTGAACATGAGTGCGATTTATTGCAGAGG GAATTAATGAA  
GGTATTC TTCTCTGACGATTTTGTATAGGGACAAA GGATTTGTTCTCTGGATGCAGATTATTAAGGG  
ATATCGGGGATATCTAATAATTC CGAGAACTAGCTTATCGAGTGAGTATGACGCTAGAAGAGAAATAGG  
CATGTGTTGCTGCTGGTTTTGTGTAGTTGTAGGC GGATTC TACACAGCTTGGAACATAGGCGCTAATGAT  
GTAGC GAATGCTGTGGGACCAAGTGTAGGAGCCGGTGCCTAACTC TAAAGCAAGCCGTTCTTATGCGAG  
CCGCTTTT GAATTTCTTGGAGCAGTATTGTTAGGAGATC GAGT TATCGGCACCATAGAAAGTGGCTGGT  
AGCTCCTTCCGGTCATGTGTTGTC ATCC CAAGACTATGTCTTTGGATGGCTGCAGCGCTTCTTGGCCACT  
GGCGTGTGGTTGCAGATCGCTTCTTCTGTGGATGGCCAGTGTGACAACGCATGCTATTGTAGGCGCAG  
TGTTGGGCTTCGGTATC ATCC TTAAGA GGATGCGGTTATCTACTG GAATTC TTGTGGCCGAGT GTTTGT  
CAGCTGGTTAGCATCTCCATTATFGA GGATACTTTGCTTTCTCATCTTCTCTTTT ATTCGGAAAGCT  
ATCC TATATAAAAA GGATCCCGTCTCTGCTATGGTGCATCGCGCCATTTTTATCGGCGATCATTATTT  
TTGCATTAGGACTAGTCTTATCC T GAGTGGTGCAGTTGCTCCCGTTATTTCTTTCTCCAGCGTTGCG  
TATTGTTTGTGGTTTATCTCTTTTTGCTTTTTTCTTACGATATGGG GAATACGCTTCTTTAAACTTGCG  
ATTC TTCTCAGGAAGTTCTTCTGGAACATTATTAGATCGGTTGTT ATCC AAAAGCACCGATTATGGGC  
GTAAGTATCTTATAGTTGAACGCATTTTTGCTTACTTACAGATGATCATTGCATGCTTTATGTCTTTTGC

GCATGGATCCAATGATGTTGCTAATGCGATCGCTCCTGTTGCAGGTATTTACCGGACACTCTATCCCAA  
AGTTATTC TTCAAAGTTCTCTTAGTGTATGTCTTTGGGAGGACTAGGTTTAGTTTGGGAT TAGCAA  
CATGGGGCTGGCGTGTGATTGATACTATCGGGAAAAAATTACA GAATTGACTC CATCACGAGGCTTTTC  
CGTAGGAATGAGT TCCGCTATCACTATAGCGGCCGCTTCCCTTAGGATTC CCTATATCTACTACGCAT  
GTTGTTGTAGGATCGGTATTGGGGAT TGGGTTCGCAAGAGGTTTACGAGCCATTAATTTGC GGAT CATT  
AAGATATTGTGCTTTCTGTTGTTTATTACAGTTTCTGCTGGAGCGCGCTTTCTATCGTATTTTTTTTGT  
ACTGCGCGCACTATTTTGTAAAGCGCAACTCTCTATATGCAGACTATATGCAGACTAAAAATGTTTGT  
TGAGCGATTC TTCATGTGGCACTGAGATAAAGGCTT GAGT TTTCTTTGCTTAGGCCATAAGAAAATTT  
AGGTAAAGGATCAGATAAGCAT GGAT AAATTATCGATAAGAGACCTTTCTCTTGAAGGGAAAAAGTACT  
AGTTCGTGTAGATTTTAATGTTCTATTAAAGATGGAAGATTTTAGATGATGTGCGT ATTCGTAGCGCA  
ATGCCACGATCC ATTATCTTTTGAACAAGATGCAGCAGTCATTTTGGTGAGCCATTTAGGACGCCAA  
AGGGAGGCGTATTTGAAGAGGCAT ATTCATTAGCTCCTATTGTTCTGTGCTAGAGGGT ATTTAGGGCA  
TCATGTGCCTCTTTCTCCAGATTGTATAGGAGAAGTCGCGCGACAGGCGGTGCGCAACTTTCTCCTGGT  
AGAGTCTTCTTTTAGA GAATGTACGTTTCCATAAGGGGAAGAAC ATCCTGACGAGGATCC TAGTTTTG  
CTATTGAGCTTGCTGCTTATGCAGATTTTTATGT GAATGATGCTTTCCGGACATCTCATCGTAAGCATGC  
TTCTGTATATC GGGT GCCACA ACT ATTC CCTGACCGGGCAGCCGAGGCTTCTTATGGAAAA GAATTA  
GAAT TTTTGGGCCAGCATCTATTAGTTGAGCCTAAACGTCCTTTCAC TGCTATTTTAGGAGGCGCAAAA  
TGCTTCGAAAATAG GAGTAATCGAGGCGCTACTTTCGTGCGT GGAT CATCTCGTATTAGCTGGGGTAT  
GGGGTACACCTTTTAAAGGGCTAT GAATCGCCAGGTAGGGAATTC ATTAGTGGA GAATCAGGGATCCCT  
TTAGCGAAAAAGTATTAGAGAAAAGCTCAAGCTCTGGGGT GAAG ATCCATCTTCCAGTGGATGCGAAGG  
TCGCTAACAGTGTG ACTCTGGAGA GGAT TGGAGGGAGCTGTCTATACAGGAAG GAATCCCTGAA GGAT  
AGCAGTTTTGATATTGGGGCACAGACAATAGA ACTATTTTCTAAGGTGATTCAG GAGT CCGCAACGATA  
TTTTG GAATGGTCTGTGCGGGT ATACGAAGTCCCTCTTTTGATCAAGGATCGAAGGCAATAGCACAAT  
GTCTCGGAGCC ATTC TTCTGTGTGACTGTGGTTGGGGGAGGCGATGCGGCTGCTGTAGTAGCTCTTGC  
AGGGTGTACTTCACAGATCTCCACGTATCTACAGGGGGAGGCGCTTCTTGAATTC TTAGAAAAAGGT  
AGTCTTCTGTTACGGAATACTATCTCCAGCTCAAAGCTAAATATCTGCGTATGC ATTC TTTGTTAATG  
AAAAGCCCTGTTTATCGGGGCTTTTTTTTTGTTTAAAAGGAGGCT GAATTC GAGATTTAGAAT GATTAAG  
ATCC TTTGCAAAAAAGATAACTCTTA ACCCATTGTTTTTAATTAATTAGAACTAATTTTCGTTCTGTTT  
AAAAACAGAACAATTGTTTTTCTTAAAAAGAAGTTTTTAAAATTTAATAAAAAATAGTTGGAAT TAAAAGT  
TATTGCTTCGGCGGA GGATTTAT GAGTATTC GACCTACTAATGGGAGTGGAAATGGATACCCGTCTATTA  
ATCC TTCTAACGATAATCAAGACGGTCTTGTGCAATCGACCTCTGGGCCTAATTACGGAGGCCATACGGT  
AATAGAGGCACTACTACTC CATCTCGACCTGTTATC ACTCAGGCAGATATTTATCATCCGACTATTTTTG  
GACAAGGAGCTCAACCTATTGTCTCTACAGGAGATAAGAAATTAGATAGCGCAATT ATTC AAGCAGATTT  
CGGTGCGCA GAAT AAACAGACTTTGGCTACACAT ATTC AAAGTAAGCTAGGTTCTATGGAGGGACAATCT  
CCTCAAGATTATAAAGCTGGTGCCTATAGTGCCTAAGATTGATGCTGTTT ACTC CAGGCGAAACTACTG  
T GAGTAGCGAGCGGAACGTCAAGCGTGCCTTAC GGGT CGGGAT CTCTGGGAACAGGCTGCAGGAGATCT  
TGCTACCAATGG GAAT ACAGATGGCTTATGTTAATGGCTAACCTATCTGTGGGAGGGAAGCATGTGCCT  
GCAGGGCATTAAAGA GAAT ACAT GAAT ACTGTAAA GGGTACGTTACTGATGAGAACGAGGCTACAGATC  
CTACGGTAGATGCCATTTTAGATTTAGCAGCAAAAATCGATGCGACG GAATTC TCTAGTCTGGTTCAGG  
GCCAGTC ATTC TTAATTATATAGGAAATGTGGACAAGTCTGTTT TAGAAAACGAGAAGATGAACCAGCTT  
GTTTTAGAAGATCAAAATGGGCAAG ATCC TCAACGTGTTCAAGATA ACTCAAAA GAGT TACAAAACTGT  
TAGAAAATGCTCGAAAACAG ATCC T GAGT TATATTTCCAAACACTA ACTGTCATAACTTCTTCTGTTTT  
CTTAGACTAAAGAGAAGGTATACGGTGTTCGGTCTTTCAACTATTAAGAGGAAGTAGTAGT GAGT TAGCA  
TAAGCCCTATAGGGGG GAATTC TGGGCCAGAG GGAT TTTCTAGTGCATCTCGAGGCGATGAGATGATGA  
TGTACCAGATAGTGAAGAGGGAGAGCTAGAAGAGCGCGTTTC GGAT CATGCA GAGT CTATCATTACCGAG  
AGCTCGGAAACGCTGTTTCGTACTACTTCTTCATCAG GGGT CAGTGAAGATCTTCAGCAACACGTTAGCT  
TGGAG GAAT CTCCACGACAACGAGGTTTCTTGGAC GGATCC GTGATGCAGTAGCTTCTATTTGGAAGCG  
TCGTGTTGCACGAAG GAAT GAAAAC TATGATGTGAAAAAGCAGAAGAGCAGCAAG GGAT TGTGCAATAT  
CTGCA GGATTC GAAAATGCCTGCTTTAACGCGTGCTTATCGCCATCTCCGTGCTTTCA ATTC TGCATGCT  
TACGTACGATTC GT GAGT TTTTTCGCTACCATTTTCTGCTTTAAG GGAT GCGTATTATCGACATTTGTAC  
ACGTTCTGGAT CAACTTTTGTGGAGCTGATAAAG ACTCTTTTAGAAGTTCTTGTGCGGTGGGT TGTCTT  
TTGCGTATGGCTACCTTACGCTCTTTTGAACATGTCGGTGG GAAT TACGAAGATCGATTAGTAAATAATG

ATGCTCCGGTGACAGGTGCGGGGAGA**ACTC**TTGTTGATGATGCTGTAGACGATATT**GAAT**CGATTTTAAA  
TACGAGAACCAACTGGCCTCAACATGTCATGATA**GGGT**TTTTCTCGTGGTCTCGTTCAATTATGTGCG**ACT**  
**C**CTTATAATGCGACTTCTCAA**GAAT**GTTTCAAGTCGATTGTTCTGTTTAGAAAAAGAAG**ACCC**TTCTTCAG  
ACT**ATTC**TCAAGCTTTATTATTAGCAG**GGAT**AATAGATCGCTTGGCGGAGAAAGCCCTATGGCTGCAAA  
GTATGTTTT**GGAT**GCATTGCGTGTTCGAACTTCGGAGCTCATAGGAGA**ACTC**ATT**ATTC**TCGATTTGCTT  
CCTCCTGTATGGAAGTTGGCCGCGGAGGCGT**ATTC**CCTCCTGT**GAAT**GAGCAGCTCGTTGTGCAAATTG  
TTAATGCAAACGTAGAACGATTGC**ATTC**CACTTTCGCTCATGAGCCACAAGCTTATTTGCGTATGATCGA  
AGGTTTGGTAACCAATTTCTTTTTCTTACCTAGCGAGGAAG**ATCC**TTCTTCGGTTGG**GAAT**ATCTAAGAA  
CATTTTCTAATAGGGAAGA**GGAT**AAATAGCGTGAAATAATACTGATTATGTGAA**GAAT**AGGCAAAAAGAC  
CTAA**ATCC**TTATATGCTATTAG**ATTC**TCGTTTCCCTACAGATTATTTATTTACGT**ATCC**TAGA**AT**TAGTCA  
**TCCGGAT**GCTTCTTGTAATTGGTATATAACCGACGCCTGCATATGTTGGAGGCG**ATCC**CTTTGATCA  
AAAACTTTCTACTGATCAAGAGGG**GAAT**CAAGTATTTTACGAGAAGTGATTAGCGAGCTACTTGCGC**AT**  
**TC**TGGGGAAAGTTATGCGATTT**CAGT**CAATTACTTGCCGTAATCGATATTTATTTAAAACAAGAGCAAC  
CGTC**GAATTC**ATGGTTCGCTC**GAAT**CTTTCGGAAGAGAGAGCGGGCTAGAAAACGACAAACAATTAATAA  
GTTGCTTTTTGTTAAAAAGT**ATCC**TATTTTTTTGAACGCCAACGGCCTGTTAAGAAGGTC**GAAT**CGGTTGCC  
**GATTC**TATTTTACAGAGATCAAAAAGAAATTTTTCTGCTTGGGACGATTTTACACATGATGTGCAG**ACTC**  
AAAAATCTGGTAGGAAACAGACATGCCAG**ATTC**ATTGCGAGGAC**GAGT**GGAAGAAGATGCTGCTTCGCA  
AATGATCGTAGAGGTTCTGCTAGCCTTTTTAGATAATCAAGATATGTACCTCTCTGTAAGTTTCGAA**ATT**  
**C**TTTCGAAATTTTTTAGAAGAGAAGGTGTTGTCGAAAAGGAGCTTGTCTCCGCGTAGTCACGAGGCAATTA  
AGAAGATAAAAGATTTGTATTTAGTCAGCCCTGAG**GGAT**TTCCAAACGTTTATCGGAGGCGTGATTACCGA  
**ATCACTC**TTTCAAGAGGAAGATCA**ACTC**GTTGTAG**GGAT**GTATGATTTTCTCTCAGGAAGGGAGAGA**ACTT**  
TTTT**GATTC**TTGGAAAG**GGAT**ATCACAGACATACCCACATGATATGCTCTATACGCAAGCATTTTTTAGCAG  
AAGTTGTGTTGCACGTGGTGCAACACCAC**ATTC**ATTTAAATGCAAAGGTTAAACCTACTTCCCCAGAGCA  
GGTAGGCAGTCTGTACAGCATTAGAGACCATAGTCC**TCAAGCTTGGGCAAGGATGATGC****GAGT**GTTATTA  
ATGCGCTGGTTGCTCGATTATCATTTTGATGTGTATGCGCACCTAAAAGAAGAA**ATTCTACGGT**GCCCGC  
CACGACCGCCTTTTTGGCAAATG**ATTC**CCTCG**GAAT**CAGGAGATGGA**ACTTTCGTAAGGAAGCTCGTTA**  
GTCTGTCTGTAAGAAAGAGCAGATAGGACACACATCGATGTTGTGGTGGAGCGCTGGACAATACGCTCTT  
GCATAGTAGAT**GAGT**TGTAATGCAATTT**CGGAGAGT**GCTTTGGTCCAAAGA**ACTGTACTAAATCTTTTT**  
CTACAGCTGAAGG**ACTC**CGTTTTCGTAGAAAGTTGCCAACGATGTGCTAAGCGAA**GGAT**ATGTGTATCTAC  
AGGGAAGGTATTTCTCCGTAATAAATGCTTAAAAAACAGAAGCTGTTTTTCTGCCT**ACTC**CTGGAAGA  
GCTGTTA**ATTCTGGAA****GGGT**GTGAGGAGGTTCTT**GATGATAACGATCC**ACA**GAAT**ATGTGATAGAGCAT  
**GAAT**ATACGCAGCTTTGCGTTCCTA**ATCC**ACAAGGAGCAAT**GAGTGAAT**AGATTT**CAGAAGGAGCCAG**  
CATA**ACTC**ATAGATTGTGCATCTGGTCTTTAGCAAAGAGAGAGG**GAGTGACAGAGTTC**CACAGCTTTGTCT  
GTC**GAAT**TTCCAGATAAAA**GGAT**AGCAATGAG**GAGT**TGAAAGG**GAGT**TTGCC**ATCC**TGTTAAAGAAGGCG  
CAG**GGAT**TAGGGAAAAGACGGTTTAAAGTAGAGATAATAAATGCACGCTTAGCTTGACATTTAGTGACTT  
CATAAGAGGTTATTTTCTTATACAAA**ACTTGTG**AAAATTTCTCCTAAGAC**ATTC**TCAGTGACTT**CGGAT**  
**CC**AGATAAAT**TGCCTATA****GAAT**GCAAAGCTTGT**CGGAGATCTAAAGCGATACATTC**ATTAGGAAGATGTT  
CTGTAA**ATCCATTC**AACGCAGCTGTTAGGCATGTATAAACG**GAAT**GAAGCAAGCTGTGATGGCGCGCAGA  
GACTAAAAGATCTTAGAAGATTTTCTA**ACTGCGTAGTATTGAGCCATTTTTGCAAAGCTTGTTTTAAT**  
**TC**CAGCA**ATCC**TTCTCCAGTTTTAGCAGATACAGAAATTTGCTGGAAGGAACCTCTATTTGAGGAGGAG  
ATACGATATCACACTT**ATTC**CAAAGTAAAATGGT**CGGCTTTTGATA**CAAATAGTAGG**GAATTC**TGGAAG  
TGGCTGCGACGC**ATCC**ACA**ACCC**AG**GAATTC**CTCTGCTT**ACTC**ATGGCTTCTCGGGCACGAGCA**ATC**  
**C**TTCTTTCTCAACCAAATTTTCTGTTTCTT**AGACCCGC**GA**AT**CAATGAGACGAAGATTTTCCCTT  
GCAAG**ACCC**AGTTTCTTCTAAAATATCAC**GAGT**TGTCCTG**GAAT**ATCAGTGACAATCGCTCGGTTTTT  
TT**GAGT**GAGCGCATTTA**GGATGGAT**GATTTTCTGCATTTGGAAAGCCCTGCTAAAACA**ACTC**GTTCCCT  
TGAGCCAGACGTTGTCCTT**CATCAA**AACTAGAAAGAAGCTCGTCTGTGATAGATAGAGCTTCCATA**ATTC**  
GATGTTTAGGGAGC**GAAT**CTT**CAGT**TTCTATATCTTCTT**CAGG**AAAGTCTGCTAAGACTTCTATATAAGC  
AAGAGCTTCTATAATTAAGAGGAGATAGAGGAGATCGCTT**GAGA**AGTATGCCCTT**GAAT**TGATTTTGA  
GCTATACGAAAAGCATCGATATTATCAGCAGCGATTA**ACTGTT**GTATGGCTTCCGCTT**GAAT**AAGATCGA  
TTTTCC**ATTC**AAAAATGCACGTTGCGAAA**ATTC**ACCAGGAAGTGTGCACGAGCTCCCTCCGCTAATAG  
AGCGTTTACAATTTGGGAGCAAGCAAAGTAACCTCCATGGCATTGAA**ATTC**TACGATGTCTCTCCCGTG  
AAAGATCGCGGGGCGCGCATCACTAAGACTAACGCTT**GATCA**ATACAGACAGCATTATG**GGAT**ACGGTGC  
CTAGGTGGGCTGTATGTGATGCGTA**ACCC**GCAATGTTGCCAGAAAAATACGATCAGAAATAGAAATAGC



ATCCGGTCCGGAGACGCGAACAAATAGCAATACTTCTTCTCTCTGGAGGAGTTGCAATAGCTGTGATCGTA  
TCATTTTCGAAGCATGGGTAGCAGCCTTTAGGCTAAATAAAGTGCTGAAAAGGAAATGATTATACTTTTGG  
ATGATCCTTTCTAAGCAAGAAGGGCTAATCGAAGAAAGGCGGGTGTTTCATATAAAAAATTTTTAAATAAAA  
GAAGCTTTTTTTTAGGAGTTCGGTATCCTGAAAAGGTTTGTGTTTTTGAGAAAGAGAACTTCTTTATAGT  
TCTTTATGCTTTGTGTGTAAGGCTTCTATAAGAAGAGCAAATCAGCCGCTTGCAGAGCAGGAGATAAG  
CATGGCAGCGCGGAAATGTTATATGTTAATCGCGAAACAGGGAAGGTAGAACAGGAACGTATCATCTGT  
TCTTCTCTGGTAAAGTTTTTTATTGAAACGAGAATAGGGAGAGCTCTGTACTCTGTTTTATGTAAGAATA  
GCCTGTTTTCCCGTATCGTAGGCTGGTGTCAAAGACTGCGAGTACGCGATATTTTATTAACCTTTCGT  
TACAAAATATCGTATTTGCATAGAAGAAGTGTCTCTCTCTGCACGACTACGCGTCATTTAATGATTTT  
TTTTGTACGAAAATCTCAAACCAGATGCTCGACCTATCTGCCAGGGAGAAGATATCTGTGTGACTCTGCTG  
ATGGTGCCTATCTTGTTTTCCCTTCCATGGCAGATCTATCCTTGTTTACCATTAAAAATAAGCCGTTTTTC  
TTTAGAAAAGTTTTTTAGGGGATCCGCAATTGGCTCACCAATATGCGCAAGGGAGTATGGCAATCGCTCGA  
TTAGCTCCTTTTATTACCATCGCTTCCACTTTCTATAGCGGGTATTGCTGAGGCACCGCGCCGTATCA  
ACGGCCATCTTTTTTCTATTATCCCTTATGCTTAAGCGGAATTTCAAGTGTTTACGGAGAATAAACG  
CGAAATTACCATAATTACGTCAAAAAGTTTGGTGAGGTTGCCTACGTGGAAGTAGGGGCGTTAAATGTG  
GGTCTATCCACCAAACGTTTTCTCCCGGTAGTTATGTGAAAAAAGGTGCCGAAAAGGTTTTTTTGCTT  
TTGGAGGATCGACTGTTGTTCTATTATTTTCAGCCCCAACGGATATCTTTGATGCAGATCTAGTTGGTTA  
TTCGCTCAGGGTTTAGAAACCCGGTGTGCAATGGGACAATCGTTAGGAAAACGTTTCTCTTCATAAAAA  
TAAAGACTTAAACGTTTTTTTTTGGTATTGCAAGAGAGAGAAAATCTCAGAAGTTGTGCATTATGTGGCTA  
ATCGTAGCATGGACACTCTGGCTTGTAGCGATGGCTTTAGTCTTTTAAAGCTTATAGGCATGTTATCA  
GCTTCCGCAGCTACGTGAATCAAGTGATGCGGGATGTGCGCTTGGAGCTAGATTTAAAAGAGTGGCGGT  
CGCAGAAATGCGCTTGGCCCCGATCCGAAAAAACGTCAATATCGACGTAAATATTTATTCTGAATATATC  
CGTATTCCTCGAGAGCTCGAACGTTTTGAAGAAGCTGAAAAGCTTTTGGGAGAAGCTAAGAAATGAAAT  
TAGCAGGCGCCCATTTTTTCTTAGAGGTTGCACATAAGGCTTTCCGGCATGGCGCCTATAAAGAGGCTGC  
ACATGCTTTTTTCTCTTCTTTCCGCTGAGCTTATGGCGAGCGAGAGGTCGCTCGCTACACCATTCTCTG  
GTATATCTTGGAGAAGTAGATGCTGCTTGTGCGGATCATTGAACCATGGATTTGGTCCACTTGTCCACCAAG  
AAGTCTTTTATTAGCGTAGGACATATCTATTTTGCAGCAAGCGCTATGCAGATGCTATCGATTTCTATCG  
ACGTGCACGGTCTTATAGGATCTTGCCCTATCGATGTTTTGTACAACCTTAGCACATTCCTTTGCGTATTTGC  
GGCAGTATGTCGATGCTGGATGCTCTTTAGAGAGCTTTTAGGGGATCCGGTTATAAAGACGAAGCGA  
TGTTTAAATATCGGTTTATGTGAGCAAAAATTAGGGAATTCGAAAAAGGCTCTGCTGATCTATCAAAATAG  
TGAGTTATGGGTTCGCGGAGATGCTTTGATGATGCGGTATGCAGCTCTTGCGGCGGCAGGATCAGCAAGAT  
TATCAGCTCGCAGAGCACTGCTGGACATTAGCTTTCCGTTGTCAAAGTTATGCTGATGATTGGAATGCT  
GTGTTCAATTATGGTTTAGCATTATGCCATTTAAAGAAATATGCCGAGGCTGAGAAGGTATATTAAAGAGT  
GATTCAAAAGACTCCGGATTTGTTTGGTTGCTTGTAAAGCACTGGCTTGGCTCGCAGGAGTCCGGACATGCG  
ACGATGATTTCTGCTCGAGAAGGAATAGCTTATGCTAAGCGAGCGCTGCAGATCAAACGATCTCCGGAAG  
TACTCGAGTTATTGAGTGTCTGTGAAGCTCGAGAAGGTAATTTTGTATGTTGCTTATGATATTCAGGCTAT  
TTTAGCCGAGCGAGATACGACGGCGAAGGAACGTGAGCGACGGTCACAGATTTTGAAAGATTTACGACAG  
AACTTCTTATAGACCAACAGCATATAGTAGAGGTTTCTTTACTGCTAGCTGCCTAGCCTTTTTCTCTCT  
TGTAAGTAAGCCCAATATAAGATCTTAGCCCTCGTATTGCTCGAGTGTCTTTTGTCTTTCTTTCTCTAG  
GAAAGTCTAGAATGTGCCTGAATGCACGGATTTCTTTTCTCTCGAGTGTCTTTCCCTGAGAAGGTTTGT  
GCGTAAAAAGATAATTATCAAAAAGAAATAGAAAAGAACCATCCTTGTTGTATAGGCGCCTTTAAATAAG  
AGAGTAGGTTTCGTTCAAGAGCATGTATTGAACATATGATGGATTTTCCTAAGCGTTTTTTTCCGGATCCTC  
CCAAGAGAGAATATTAACGATTCAGAAAGTTGGTTGAAGAGGTTAATGCTTGCATGAGAAATTCCTCG  
TCCCTGTCTGACGACGAGCTTCCGCAAAAAGACCCCTCAATTGAAGCAAAGATATCAAGACGGGAGTCA  
TAGATAAACTTCTTCCAGAGGCTTATGGAGTTGTTAAGAACGTATGCCGGCGTTTGGCAGGAATCCCGGT  
GGAGGTATCTGGGTATCATCAGCAGTGGGATATGGTTCCCTACGATGTGCAGATTCGGGTGCTATCGCT  
ATGCATAAAGGCTTTATCACCAGAGATGCAACCAGGGAAGGAAAGACATTAAGTGCAGTATGCGGCTGT  
ATTTAAATGCTTTAACAGGAAAGCCTGTTTATCTCGTTACGGTGAATGATTATTTAGCTCAACGAGATTG  
TGAGTGGGTAGGTTCTGTGTTGCGTTGGTTAGGATGACGACCGGGTTTTAGTCTCCGGGAGCCACCA  
GAGAAGCGTAAAGCTATTTATCAGTGTGATGTCGTATACGGAACAGCTTCGGAATTTGGGTTCGATTATC  
TTTCGGATAATTCGATCGCCACAAGAAAAGAAGAGCAAGTAGGTCGCGGTTTTTTACTTCGCTATTATTGA  
CGAGATAGATTCGGTGTGATTGATGAGGCTCGAACTCCACTCATTATCTCCGGGCCAGGAGAAAAACAT  
AATCCCGTGTATTTTGAATTAAAGATCGCGTAGCGGAATTAGTGTATTTCCAAAGGGAATGTGCAACC

ATATTGCTATTGAAGCTAGAAAGGTCCTTGGATCCTTTTTTAGGAACCGATGTGCTTCCTAAAGGATAAAA  
GGTTATGGAGGCAATCTCTGAAGCTTGTTCGAGCCTTATGGTTAGTTAGCAAAGGAATGCCGCTCAACAGA  
GTGTTGCGTCGTGTACGAGAGCATCCAGATCTTCGTGCTATGATCGATAAATGGATGTGTTCTATCATG  
CCGAACAAAATAAAGAGGAATGTCTAGAGAAGCTCTCTCTATATATTGTAGTCGATGAACACAATAA  
TGATTTTGAAGTAAACAGACAAAGGAATGTTGCAGTGGATTGAGAAGATCGGTGGTGTGCTGCAGAAGACTTT  
GTGATGATGGATATGGGGCATGAATATGCTCTGATTGAAGAAGATGCAACGCTTTCACCAGCAGATAAGT  
TAAATCGTAAGATAGCTGTTTCCGAGAAAGGATACGCAAAGAAAAGCCCGAGCTCATGGGCTACGGCAGCT  
GTTAAGAGCACACTTATTGATGGAGAAAGACATCGATTATATTGTGCGCGATGATCAGATCGTGATCATC  
GATGAACATACAGGACGCCCGCAACCAGGACGTCGTTTTTCAGAAAGGATTACATCAAGCGATTGAAGCGA  
AGGAACATGTAACGATCCGTAAAAGAGTCGCAGACCTTCGCGACAGTTACCTTGCAGAACTTTTTTCAGATT  
ATATGAAAATTAGCAGGGATGACAGGAACCGCAATCACC GAATCTCGA GAGTTAAGGAAATTTATAGT  
CTCTATGTGCTGCAAGTCCCTACATTTAAGCCTTGCTTGCGTATAGATCATAATGATGCCTTTTATATGA  
CAGAGCGTGAGAAGTATCAGGCTATTGTTGCTGAGATCATTCTGCGCATCGTTCGGAAAGCCGATTCCT  
GATCGGGACAGAATCGGTGGAGGTGTCTGAGAAACTTTCTCGTATTTTGCGGCAAATCGTATTAATCAT  
ACTGTACTCAATGCTAAAAACCATGCGCAAGAAGCGGAAATTATCGCAGGAGCTGGAAAGGTTGGCGCGG  
TTACGGTGGCTACGAATATGGCTGGTAGAGGGACAGACATCAAGCTGGATGAAGAGGCTGTGGCTGCTGG  
AGGACTGTATGTTATCGGTACGTCACGACATCAATCTCGACGTATTGACAGACAGCTGCGTGGTCTGTTGT  
GCACGTTTAGGAGATCCGGTGCTGCGAAATTCCTCCTTTCTTTTGAAGATAGATTGATGAGGCTTTTTTG  
CCTCTCCAAAACCTCAATACATTGATTCGCCATTTCCGCTCCTCCAGAAGGTGAGGCGATGTCGGATCCAT  
GTTTGATCGATTGATTGAAACAGCGCAAAGCGTGTGAAGGACGTAACATAACCATACGTAAGCATAACC  
TTAGAGTATGATGACGTCATGAATAAACAACGACAAACCATTTACGCCTCCGTAATGATGTACTTCATG  
CTGAAGACTTGTGTTGTTGTTGCTAAAGAGCAGATAGAACATGTTGCTTTAGCCTTAGCCTTTCTGATTTT  
AAAAGATGCTCATGCGGATCATTGCTCTTTGCCAAGATAGAAAGAGTGGTTGAGTTATTCGTTCCCTGTG  
AAGCTAGATGATCAGGAAATCCGTCGACTCGGTGATGTAGATGCGGTAGCAGACTACATAGGGGATTTAT  
TAATAGAAGCCTTCGATGTTAAGTTCTCTGCGATGCTTGCTGAGTTTACAGAGATTATTGGGTGAGCAGC  
AAATGCTCAGGGGATATGTAATGACATTCCTCGTTCGGTGATTATTCTCATATCGATGAGGAATGGAAA  
GTGCATCTTGATAGATATGGACTTATTACGTTCTGAAGTAGGACTGCGTTCGGTTGGCAAAGATCCCTT  
TAATCGAATTTAAGAATGAGTCTTCCCTGCTGTTTGAAGGGCTGATTCGCGATATTCGCATTGCTATAGT  
GAAACACTTATTCGCTTTAGAATTATCATTAAACACGTAGCGATAGACCAGATAATGCTATCCCAACAGTA  
GCCACGGCTTTCCATAATCATGACAATTTTCGCCCTATGGAGTTGACAATTGTCGGTGAGGAAGAAAGAGT  
CGTAAGAGGCTTGTCAAACCTAGGCAATCTCCTTAATTGGAGATTGCCTTTTCTATTTAGAGAGTTCGTTA  
GGATTCGAAAAGAGCTAGGGTGTATTGTTATATGAAAGTAGACCATTTAGACCAAGGATTC CCCGTCATG  
GTGACGAATCCAGAAAGAGCGATGATTATCACCCTAATAAGAAATGTACACGATGTTCCCAATTC AATGCG  
GTCATGCAAATGATGATATTGTCTAAGTTGGCATTTTGGGCTGGGAAGTCTTCAGGAGCATGAATCAGCT  
TTTCCACATTAGTGGT GAGTAGCAAATCTGGCTGAAGAAGTTGATCGCAGTCATATTCGGCTGTAGTGAT  
CTTTTAGGAGGAATATTAACCACCTTCCCAACAACCTTGGTAATAGCCGC GAGTATAGGCATAATTA  
TGATCACTAATATA GAATGACGAATCGCACCATTTAATATGGACTTCCCTAATACAATCAGTAAGTCAC  
CATTTCTCGATCATCTTCTCTATATACACCCCTGTATCATGGTAGGCATCTAGAGGTTTTGTCTTATC  
AGACTCGCAGATAAGATGATCTAGTTCATTATCGGGCTC GAATTCATCATAGGGTTCGTAGTGCATAGGG  
ATTAAAATCTCCAAGAAATAACTAATTTTAGTTTTTATTATTTCTAATAAAAAGATTTTTATTTTTTTACA  
AATTAATTTGATTTCTTGCAGGTTTTGCTTTGTATTC TAAATCAAATGGAATCTTATATAAATTTAAAAG  
CTGCTTTTAAAGTGTTTTTTAAATACA ACTCGTAAGGTTTCGTCAGCAGACTATTGGAATGATAAACAG  
CAAGAAAGTAAATGGTGTGTCGTCGCTTATGAATCGCATAGTAGATGCGTAAACGTTTGCCATTAATGACC  
TGC GGATGGTGTCTTTGCATAGCAGAAGCTAATACCTTGTTAACTAAGGAAGTCGA GAGTTTTGTCGTTG  
CAATAGTATAGATATCATCAATAGCAGAAAAGATTTGTAACAGATGCGGCGTGTGCTTGGCTGAAATACA  
AAGTATGTGCGCTTGACCTATATAGGGATCCATTTTTCGCAAGTCTTGAACATAATGTTCCATGCGAACA  
CCAAACATTAAGTCCATTTATTTACGAGAATCACATGAGGTTTTTTATATCTCGCAATCATAGATA GAA  
TCCGCTTATCTTGATAGGAGAGCTGCTGGGTGCGATCGATCACTAATAGGCAAATGTCTGTTCTGGAAAT  
GGCTTTTTCTGTTGAGAGAAGACATCCATTC CACAGAGTTTTAATGCTCTTAGTTTTTCTTAATCCG  
GCAGTATCTATAAAGACGTATTC TTTATTGTTATGCGTATAGGCAACATCGATGTTGTCTCGTGTAGTCC  
CTGGA GAATTATCCGTTATACAGCGCTCCTCCTAAGAAGAGCATTGATAATGGAGGATTTCCCTACATT  
GGGATGCCCAATCAACGCTACCTTTAACGGGCGGTCTACAGGGGCTGGCGTCCGCTGCGCAACGAGC  
TCTTCCAGGAAAGAAGCTTCTTCTTGTGATAGGGATTCATTTTCAAAA GAGTTTCATCAGCAAAGGCAT

GCAAAGATATAGCAGCCTCTTCAGAGGGGAGCTCGTCTTCTTGTACAACATCTTGTTCTTCTACAGAAG  
TACAGGGATCTGCGGATCTGACGGATGCGTTCCAAAGTAAATCAATATGCTTATCATGGCTAGCCGAT  
GTGGCAATCATATCAGAGATTCCTCAATCCATAAAAATTCATGAATGCGCTGTAAATCCTGCTGGGAATCCG  
CTTTATTCATAACAAGAATCAAAGGCTTCTTCAACGGCAGGAGACGCTTAGCCAGCTCTTCATCTTGTTT  
GGTGATAACCATCAGGATATCTACTACAAGCAGCAGAACAGAGGCTTCCTCTGCTGCTGCTAAAGCTTGT  
TGATGAATTTGCTTTTGGAAATCGGTGCGGTAGACTCTTGGTCTACGCCCCAGTATCGATAACATGGATAA  
TAGAATCCAGGCTCGAATTTCTCCATACAAACGATCTCGCGTAGTTCCTTCTTGAAGTTTCCACAATCGC  
TAAAGAGCGTCTACATAAGCGGTTGAAGAGAGAAGACTTCCCTACATTGGGTCTTCTAAAATAGCAATA  
CGCATAAACAGGCTCTATTAATCCAAAGTTGAATAATTAGGAAGAAATGATAAAAGTAAAAATTAAT  
CTAAAGAACTAAAATAAACTATTTCAGAATGTTTTATCGGAGAAGAGAGTTATTTCCAAAATCCCTTGC  
TCTTCAGTAGAGATAAAATTTTTCTTTGTCCGAGCACTCGTGTCTATGGATAGCGCTTCAGCTTCTCT  
GAGTAGTTCCCCTAGTAACCGACCCGGAGTAATTCCTTTCGCGATGAGATCTTGCGCCGAAACAAGAGGA  
GCTCCTGACTGGATTCCTTCTATGAATGCTGCAAGACGTGTTTTTAGGTCATGTATACGAGCAATAAATA  
GTTCTTGCTCGTCTGGTGAGCGCTGCATCGACAGGAAGAGCGAAAGCAGCAAAGAGGAGGTCTCTGAAGC  
AAAAAATGTGCCAGAAAACCTTGTCAATTTTGTGGATAAAAATGAGGAAGAGCTGCGTACCAGTCT  
TCCAATAGTTTTAAGCTCTTTGTTGGATACGCGTAAGCGAGAGAAGGCTTCTAGAGCTTTTTTCTTGTCTA  
CTTCTCGGAATAAAGGTAGCAACAAAGCGATCTCTGGAATCTGAGAATCATGGATTTTTTGTGCAAAAGC  
AATTGCAGAGCGTAAAAATCCACTCGAGGATACTTTTAATTCAGGGAATAGGATAGGAAGCACTTTTAAT  
TTGGTAAGTAAGTCAAGACTCGTAAGGGGCTGTCCGGAGCATTTTTTTTGAGCTCTTGCCAAAATTCCTT  
CAGGAGCGACAGAATTTGGTAAGGAAGGCAGCTCCTTAATGATGGCTTGTTCGGTTTGC GGATCTAAAGC  
AAAGCCTAATGTGCGAGCAAAACGAATGGCTCTTAGGATACGGAGTTATCCCTCTAGGAATCTTTGTTTT  
GGATGGCCAATGGCCC GAATGATTTTTCTTTCTAAGTTCGGCTCTACCTTCTACTAAGTCGAATAGTTTCT  
CTTCAAAGGGATCATAGTACATGCCATTGATGGTAAAATCCCTACGAATAGCATCGTCTTTCATCGATGC  
AAAGACA ACTCGATTAGGATGTCGACCGTCTTCATAATCTTCATCGCTACGGAAAGTAGCGACTTCAAAT  
AACTGCCATTCTCTTTACAGCGATAATGCCGAAAGCCGCGCCAATAGAAAAGATATCCGGGAAGATTG  
TAGTGACAATAGTAGGAGAAGCATTAGTTGCTATGTCTACCTCTTCGATGGGGCGTCTAAGAGCATGTC  
TCGAACGCTCCCACCAACGAAATACGCTTGATACCCAGCATTGCGTAATTTTCGAACAATCTTTTTTGCA  
ACTTCCAATGTGGACTGGGTCTATGCAATTCCTAAAAGTTAAGCAATCGCCTCTGGTGATTTCTGAATAAT  
GACCGAGGTTTTATTTTGTGTGATAGTGTCTTCTCTATACGGATGGCTTCTACCCTAGGGTTCGGAAGGG  
ATCTCGAACATAAGATCTCTGAGAAGATTCCTAAGATCATTCTAAGGCTCGGGCTCCGGTTTTGGCTT  
GTTTAGCTTTTTGGGCTATAGCATAAAGAGCCTCTTTTTTCGAAGATTAACCTGACGTTTTCTTCTTCTGAA  
TAACTCTGTGTATTGCTTAACAATCGCGTTAGCTGGCTCCGTAAGAATCTCAACAAGCTCATCAAGAGTG  
AGTTCTTCACAGTTGACAATAACAATAAACC GCCGATAAATTC TGGAATCATTCCAAAGGTGATCAAGT  
CTTCTGTTTCTACTTTTGCAAGTAGATGATCGCGATTCGTTACAGCCAGATCGGTTTCTTCGGAGAAGCC  
TATCGTTGTTCTTCCGAGTCTTTTAGCAATGATTTTATCCAGGTTAACAAAAGCTCCCCCACAATGAAG  
AGAATATTCCTCCGATTTTACACGAATATACTCTTGGTTAGGATGCTTCTTCTCCTTTAGGAGGGATAT  
TTGCAACAGTTCTTCGATGATTTCAAAGGGCTTGTGGACGCCCTTCTCCAGAAACATCTC GAGTAAT  
GGAAACATTAGCAGTTGTGCGACCAATTTTATCGATCTCATCAATGTAATAATGCCTCGCTCTGCTCGC  
GCTACATCATAATCTGCTGCTTGCAAAAGCCGTAACAATAATTTTCTACATCTTCTCCGACATAACCGG  
CTTCAGTTAAGGTAGTCGCGTCTGCAATTGTAATGGGACATCTAAAATCTTAGCTAATGTTTTAGCGAT  
TAAAGTTTTCCAGATCCCTGTTGGCCCTAGTAATAATACGTTGGATTTCCCATAACTCACTTGTTTATCC  
TGCATAAGAGCACGGATACGCTTATAGTGGTTATAGACGGCAACCGAAATCGTTTTTTTTCGCGCGCTCTT  
GTCCAATGACATAAGAGTCGATGTGGCGTTTGTATTTCTTTAGGGTTAACACTCTCAGACTTGTGGAGA  
GCTTGTGGAAGATGTTGCGATCTCCTGTGTTGCGGGAGCTGGAGTTTTATCCAGGATCCAGAACACAGC  
TTAATAACAATAGTCGCAATGTACACGGATGGACCAGCGATTAGCTTCTCAACATCTTCTCAGATCGTC  
CACAAAAGAACAGACCCGCAAGATTTTTTTTTGTCATAACAATTCCTAAGACGCAATACTCTTATCTTT  
TGTCCTTTAGCAGAAGAGATCACTTTATCAATTAACCCATAAGCAATTGCTTCTTCTGCTCCATAAAG  
AAGTCTCTCTCTGAGTCTTCAATGATTTTTTCTACTGATTGGCCAGTGCATTCGCAAGAATATTGGAGA  
GGTGTTTTTTCAATGTTAAAATTTACAGAGCTTGCAGTTGAATGTCGTCAGAGGTCCCAATGATCCCTCC  
TGAAGGCTGGTGAATCATCATGCGGCTATGGGTAGGGCATAACGTTTCCCCTTTGTCCCTGCAGATAAT  
AAAAGCGCTCCCATAGAAGCGGCTTGTCCAATGCAGTACGATTTACATCACAGCCTAGGAAACGAATGG  
TGTCGTAATCGCTAACCTGCTGTGATATATCCCTGGAAGAGTTGATGAAAATTTGAATATCCTTAGT  
AGGATCTTCAGACATAAGAAATAGAAGCTGGGCTATGACCGTATTAGCCAAAGGCTCTGTAATTTCTTGC

CCAATCATGACTATGCGGTCTTTCAGTAGCCGA GAAT AAAT ATCC ATGGCTCGTTCGCCGCG ACCC GTGT  
CTTCAACAACGTATGGTACCAACGTCATATGTGTGCTTCCCTCTCAAATCATTTGGTTACAGGTGTGCTTA  
CGTTATGGCTACTC TTG ACCC TAGAAAAGAAAG ATCC TATCTA ATTC AAAATACACCTACGCATCAAAT  
GAT GAATTC TATGTTAAGTGTCTCTT GGGT CAAGCGTTTTCTGCGATCAAATTAAGAAGGAACAACC  
TCTAAATCTTTTTTCTC GGAT GAAATGCTTCAATGCTTTACGATAAGTCAATCGATCACGAGCAACAA  
GAACTA ACTC TT GGAT CATCTCATTAGAAATATCTTTTGGAGGGT AGCCTCCAAAACGTTCTCTGGAGCA  
AAC ATCC ATCATATATTG GAGT TCTTCTCTAGAAA TAGACAAGCC TTTTTCTG GAAT ACTTTTT GAGT  
AAGAACAGAAGCTTCACAGCCTTCC TTGCATCTGCTTTCGCTTCTCTAGTAAAGCTTGTTTTCTGTTCCT  
CTAGCTCG GAAT CGGAGCAATATTTGACTAAACGAGCGTTAACAGTTTTTCTCTAGAGAGAAGTTCTTC  
TCGCTCTCGCAATAAGCTCTCTGGTAAATCAAATCTATAAGCTGAGCTAAAGC ATCC TCTGCATCAGAG  
AAACGTTTTTGGTGCTGAGCTTCTTTAGCTTGATTTTCTAATTGTATGCGAAGCTTTTTCTTCAGATCTT  
CCAAAG ATTC TGCTGTAGTTCTCGAGCTTTTTCATCGTCCATTTCCGGAGATGAAATTTCAATCACAGC  
GTTGACAGTGAAGGTAAGAAGATCTCCGTTTAGGAA GGAT GAAT ATCTTCAGAACCAATTTCTCCTCT  
ACACGATGCCCTGTAGACACGTTCAA GAAT CTAGCTTTAAAA GAAT CTGT CAT ATCC TCTTCGTAATTT  
TGAAATATTTATTTTTCAAAAATAGCTACTGGAGT CGAATTC TCATC ACCC CTTT TAGAGACATATAGAGA  
TAAGGAGATAAAGTCTCCTTCTTGGGAAGGTCTCGTGACAGGTGTTTTGGTTGCAAAAAGTAAGCAACA  
TTTTTTTA ACCCATTC TCTAAATCTTCTTCAGAGATCTCTTTGACAGGTTCA GGAT CAGGCAAGCTTAAC  
GCTCCCATGGTAGAGAAG GAAT GACAGG GAAT GCTTCGTACAGGAAAGAAACAGAGCCTCCGTTTACCGG  
GT TGCAAGTATCAATTGCCGAGGAGCGCACAGCTTTTGGAGATAAAGTTTTCTATCACACATTTGTGAA  
AGAGCTTCAAAAGAGGCTCTAAGGAACAAACGTCG GAGT TCCTGCTCCACTT GGGT GAAT AGCGAGACT  
CAACAATATTATCAGGTGCTTTTTCTTTGCGAA ATCC TGGTAAAAACAATTTTTTTTTGACGGTCTTCAG  
AGCTTCTTTATGACACTTTTTGTGTGACCAAG GGAT TAGCTTGGACTTTTTGCAGACACAACACAACCAGCA  
TTTTCTTCTATATTTATAGAAAACAAATCATTAGAAAATCTCGTGAAGACACA GAAT ACCC ATTTGGTA  
AGTT ATCC GGGAAAAGAGAAGC GGGT GATGAGGCTTGA ACTC ACGACCTTACGTTGGCAACGTGCGCT  
CTACCCTGAGCTAC ACCC GCGAGAAGAGGAGC ATTC TAGATAATCTGGGGAGT TTTTCGCA ATCC TTTG  
CTTG TAGTTTTTACAAAAAACGTTGGAAAAAGGTTTTTTTGAGAAGGTGAAGAGTGGTAAAAAAGAAA  
AATTGGACTGCAACAGCTTTAAAAAGGGGAAAAATAGAGGAAGAAGAGAGCGTCAAATTTTCATTGAT  
TTAGCGGAAGTAAAAAGGTACAAGTAACAGGTCTGTCA ACCC CCTATGTTTTAGAGGAGAAATGCTTAAT  
TTTCGTAAATTAAGAAGAGATTTTACAGCTAACATACTGCAAGATGGAAAAGAGT TATTTGCTCAAGGAG  
CTGTGGTTAGTGCCAAAATCTTATCTAT GAAT GCGGAGACGGTGTGTATTAGCGCACAAATTC GTGGTTC  
GTACGATAACGTTTAC GAGT GCGAAATTGAAGTAGATCGAGCG GAAT CTGACACCGT GGATTC CAACTGC  
GATGTTCTTACAATTACGACTGTCAGCATGTGCTTGCCTTGTATTATTTACTTAGAGCAGTACTTCAATG  
AAATGGTAGTTACCT ACTC TAAGGAAGCAGATCTTCTTCTAATGAGGAGGT GAGT AAG GAAT TACAAGA  
GACTTTTGTCGTTGCAGCG ATTC GAGAGGAGGAACGAAGAGATCGGGAACACCAAAAAGAAATCC TTCGG  
GAAT ACAATCATGCTGCTAATGTTTAAAGTGA AA ATCC CTTCTCTTGCCTTA GAGT ATTC TGAGAAAG  
ATAGTGCAAGACTAGCTGTTTTGTTGTTCTCCTCAAAAAATGAAGGGGAAGTCTTCTCTCCTAACAGCC  
TATA GAAT TTCAGCTTGTCTGCGTCTTCTGGGCGTTCTAAACCATTTTACATTTCCAATATCAAACA  
TTTTTAGAAGGGGT TTTGTATCAAGAGCCTATTGCTTTTAGTGGAAGAAGATTTTTCTTTACGCTCCAGT  
CTTTTAGTGCTTCGGACAGAAA ACTC ATCGATTTGCTG ATTC GTTATGCGCGTTATGCTACAGGAAGTTC  
GAACATCAAATGGCAGAAAGCGGAGGCTCTCAATTAGGAGAGAGA GAAT GTTTT CAGG GGAT CTTTTGTG  
G GAAT TTAGAAGAACC TTTGCTTTGGTCAGTTTCTCCCGCTAAGATGAAGTCCACTTAGATTACTTTGA  
TACGCCATACAAAGCGTTATTAATGAAAC TTTGATTGTTGT GGAT GAAGAG GAAT TACAGCCTGAGCAA  
GCAGTTCTTCTG GAATCCAATT ATCC TGGGAT TATTC ATAAGAAT GTTTATCACCATTTCTTGCCGAGAA  
TTAAGCGTGCTCATTTAAGAACTTTTGCAGGGT TGGCTGATATAGCT ATCC CGGAAGCTCTGTTGGTTC  
CTTTTGCAGAACGCTTTGCCAGT ATTC CGAAATATGCGGAAT TGTCCAATGTCGAGGCTTTAAACGTT  
TTCAGTACATTGCCATATACAGAG GAAT TACAAGGCGTTTGTGATATTAGCTATTT GGATGGAGA ACTCG  
AGGCGAG ACTC TTTTTCTTTACGACGGGCAGAAAGTTCTTGCAACTTCTTTCTCTTTGACAGTATCAAGA  
AGTTGCACTTTTTGTTGCTCCTGATG GGAT TTTAGCTCGGAACTTAGTTGAAGAGAGAAAAATTC TAGAA  
GAGGTATTTTCT GGGT TTTGTCTATGACGAGCGCGATGGAGCTTTTCATGTAAAAAGTGAGAAGAAGATTG  
TC GAAT TTATGACAGAGACGATCC CTAATAACCAGCATCGCATCACATTTAATTGTCCAGAAA ACTC TGTC  
TGATCAGTTTATTTATGATGAAACTGTCTTTGATCTCATTTTCCGAGCAGGAGAG GGAT ATCAACTACTAC  
GAAGCG GAGT TAAAAGTT CATGGCTTGCTGAAAGGCATCAGTTTAGACTTACTTTGGGAT TGTGTCAGTG

CGAAGAAGCGCTTCTTA**GAGT**TGCCTAAAAAGGGCGGTCAATTGAAAAAGCGGGCGAGGAAAGGCTTC  
TGCTTCGAAACTTCCATGC**ATCC**TTGTCCTCGATTTAGAAAAATCGCACCTGTT**ATTC**CAAATTTTCAAT  
GAAATT**GGGT**TCCAAGTTCTAGATGATTTTGTGAGAAATGTCTTTAT**GGAGT**CTATCTG**GAAT**TTTCGC  
CG**GAAT**CTTTCAAAGATCTTCTGTGAACTTTTCTATGACAGAAGATCTCGCTGAAATACAGAAACAG**AT**  
**TC**GTGGAGAAGTAGACTTT**GAGT**TCCAAGAGGTTCTTCTCAA**ATTC**AGGCAACGTTAAGAGGCTATCAG  
AAAGAAG**GGGT**GCATTTGGTTAGAGCGTCTGCGTAAGATGCATCTTAATG**GAATTC**TTGCAGATGACATGG  
**GAT**TAGGGAAGACGTTGCAGACCATTATTGCTGTGACACAG**AGT**CGCTTGGAAAAAGGGCGG**GGAT**GTTT  
TCTAATCATTGCCCCACTTCTCTTGTGTACAACCTGGAAAGAA**GAATTC**CGAAAAATTA**ACCC**AG**AGT**TT  
AAG**ACTC**TCGTAGTTGACGGT**ATTC**CGTCTCAGCGACGTAAGCAGTTAGCTTCATTAGAAGAG**AT**TGATG  
TAGCGATTACTTCTTACAATTTATTGCAGAAAGACATCGATATCTACAAAGATTTTCTTTTTGACTACGT  
TGTTTTAGACGAGGCGCATCACATTA**GAAT**CGAACT**ACCC**GCAACGCCAAATCGGTAAAAAT**GATTC**GC  
GCTTGTATCGTTT**GATTC**TTACAGGA**ACTC**CGATTGA**GAATTC**ATTGGAAG**AGT**TGTG**AGT**TT**ATTC**G  
ATTTCTCATGCCAGGTCTCCTTAGCAGCTATGATCGCTTTGT**GGGT**AAATAC**ATTC**GTATCGGTAACTA  
TATGGG**GAAT**AAAGCGGACAATGTGGAAGCTTTAAGAAGAAAGGTTGCGCCTTT**ATTC**TTTCGCA**GAAT**G  
AAAGA**GGAT**GTTCTAGAAGATCTACCTCCTGTGTCTGAA**ATTC**TTTATCATTGTCATCTCACA**GAAT**CAC  
AGCGAGA**ACTC**TATCAGTCTATGCGGCTTCGGCGAGACAAG**AAAT**TATCTCGCTTAGTGAAACAAGAAGG  
TTTCGAGAGA**ATTC**CAT**ATTC**ATGTGTTGGCTACGCTT**ACCC**GATTAAAACAGATTTGTTGT**ATCC**TGCA  
ATTTTTGCGAAGG**ATACTC**CAGAGCCAGGAG**ATTC**AGCAAAATATGACATGTTGAT**GGAT**CTGTTGAGCT  
CATTAGT**GGATTC**TGGCCATAAGACAGTTGTCTTTAGTCAGTACACCAAGATGTTAGGTATTATTAGACA  
AGATTTGGAAGCTAA**GGGTATTC**CTTTCGTATATCT**GGAT**GGTTCACCAAGAACAGATTAGAGATTGTT  
CAACAGTTCAATGAAG**ATCC**AGGTCTTCTTGTTTTCTTGGTTTCTTAAAGCTGGAGGAACA**GGAT**TAA  
ACTTGGTTGGAGCTGATACTGT**ATTC**ATTACGATATGTGGTG**GAATCC**TGCTGTGG**GAAT**CAAGCTAC  
CGATC**GGGT**GCATCGTATTGGCCAG**AGT**CGTTCGGTCTCTTCTATAAACTAGTTACATT**GAAT**ACAATC  
GAAGAAAA**ATCC**T**GAGT**TTGCAGAACCGAAAA**GGGT**CTTGTAAAGAAAGTGATCA**ATTC**TGATGATG  
AAGTCGTTTTCTAAGTTAACTTGGGAAGAAGTGCTCGAACTTCTACAGATATAATTTTATGAGCCATAACC  
GCAGCTTATATAAGATTAAACATTTGTCTAACCGTCTGTATAACAAGGCGTT**GGGT**CGTTTCGATCGTGT  
ATTTAATTTTTTTTCCGG**GAAT**GTTGGTATCGACCTAGGGACGGCAAACACCTTAGTTTATGTCCGAGGT  
CGAG**GGAT**TGTTCTTAGTGAACCTTCCGTTGTGGCTGTAGATGCACAG**ACTC**ATCGGCTTAGCCGTAG  
GTCATAAAGCGAAGGCGATGTTAGGGAAG**ACCC**CGCGGAAATTTAGCTGTTCCGTCATGAAGGACGG  
TGTCATTGC**GGAT**TTTGAATAGCAGAAG**GGAT**GCTAAAAGCCCTCATTAAAC**GAGT****GACTC**CTGCTCGT  
AGTATGTTTTCGTCCGAAA**ATTC**TTATTGCTGTTCCCTCAG**GAAT**TACCGGTGTTGAAAAACGCGCTGTTG  
AAG**ATTC**TGCTTTGCATGCGGGAGCACAGGAAGTA**ATTC**TGATTGAAGAGCCTATGGCAGCAGCCATTGG  
CGTCGATCTCCCTGTACATGAACCTGCAGCAAGTATGATTATTGACATTGGGGAGGGACAACAGAAATA  
GCTATTATTTCTCTTGGAG**GAAT**TGTA**GAGT**CGCGTCTTTGCGTATAGCAGG**GGAT****GAGT**TCGAT**GAGT**  
GTATTATTAATTATATGCGCCGCACATAACAATTTAATGATCGGTCCGGACAGCAGAGGAGATCAAGAT  
TACTATAGGTTCTGCTT**ATCC**GTTAGGTGATCAG**GAAT**TGGAGATGGAAGTACGCGGACGCGATCAGGTA  
GCTGGGCTGCCTATCACGAAA**GAAT**CA**ATTC**CGTAGAA**ATCC**GG**GAGT**GCTTAGCAGAACCT**ATTC**AGC  
AAATTATAG**GAAT**GTGTACGGTT**GACTC**TAGAGAAGTGTCTCCAGAA**ACTC**TCTGCAGATTTAGTAGAGCG  
TG**GGAT**GGTGTAGCCGGAGGAGGAGCTCTGATTA**GGGT**TAGATAAAGCATTAAAGTAAAAACACCGGG  
CTCTCTGTTATTACAGCGCCGC**ATCC**ACTTTTAGCGGTCTGTTTAGGTACAGGGAAAGCTTTGGAACATC  
T**GGAT**CAATTGAAGAAACGAAAAG**GAGT**TTAGTATGACCGGCGATT**GGAT**ATCTAAGATA**ACCCATTC**A  
**GGAT**TAAAATCTT**GGAT**AGAAGAAGTAATTGCTTTGGTGTACCTGACGACGTAAGGTTATGCGATGGTT  
CAGAAGCC**GAAT**ACCAACAGCTTTGCCAGCAGATGCA**GGAT**GCTG**GGGT**GATG**ACCC**CTCTAA**ATCC**TGA  
GCTGC**ATCC**TAAGTCTTCTCGTTCGTTCTTCTCTTAGTGATGTCGCTCGTGTGAACAATTTACTTTT  
ATTTGTACCAAG**ACTC**AAGAAGAAGCTGGTCCAACAATAACTGGAGAG**ATCC**TCAAGAGATGCGTGCAG  
AGCTGCACGCATT**ATTC**CGAGGGTGTATGCGAGGTCGCAC**ACTC**TACATTGTGCCTTTTTGTATGGGGCC  
TTTTGA**ACTC**TCCATTTCTTTGATTTGGTGTGAGATTACAG**ACTC**TCCTTATGTTGTATGTTCTATGAAG  
ATCATGACGCGTATGGGAGCTTCTGTTTTAGCGATGTT**GGGT**TCTAATGGGACTTTCTATAAGTGTTTAC  
ATAGTGTAGGGAAGCCCTTAGCTCCTGGAGAGAAAGATGTAGCATGGCCTTGT**ATCC**TGAGCATATGCG  
TATTGTCCATTTCCAAGATGACAGTAGTGTGATGCTTTTGGTAGC**GGAT**ACGGAGGCAACGCATTTGCTA  
GGTAAGAAGTGCGTAGCTTTGCGTTTAGCTTCTTATTTAGGACATCAACAAGGTTGGTTAGCGGAGCATA  
TGTTGATTATTG**GGGT**GACTAA**ACCC**TGAAGGAAGGAAGAAGTATTTGCTGCGGCGTTCCCTAGCGCTTG  
TGGAAAAAC**GAAT**CTTGCTATGTTGATGCCTAAGCTGCCAGGGT**GGAAGGTG****GAGT**GTATTGG**GGAT**GAC

ATTGCTTGGATTCGTCCTGGTAATGATGGGAGATTATACGCAGTGAATCCAGAATTTGGATTTTTTGAG  
TGGCATTAGGAACCTCAGAGACTACAAATCCTCACGCACCTGCCACTTGTGCATGCGGACTCCTATTCAC  
GAACGTAGCTTTGACTGCTGATGGAGATGTATGGTGGGAAGGTA AAACTACCACGCCTCCGCAAGGTATG  
ATTGATTGGAAAGGTCGAGCTTGGTCTCTGGAGGGGAGCCTGCAGCACATCCTAATGCGCGTTTTACAG  
CTCCGTTGGATCATTGTCCTTCTTAGATCCGCAATGGAATAATCC TCAAGGGTTCCTTTAGAGGCGGT  
CATTTTTGGTGGAAAGACGTACAGAGACCATTCCTTTAGTATATGAGGCGTTAAGCTGGGAGCATGGGTG  
ATGATGGGGCAGGGATGTCCTCAACGACA ACTGCCGCGATTGTAGGGGAGTTGGTAAACTGCGACATG  
ATCCTTTTGCTATGCTTCCATTTTTGTGGCTATAACATGGCAGCTTATTTGAGCATTTGGTTGTCGTTTTGC  
TACTAAAGGTTTTGCAGTTGCCTAGAATTTTTGGTGTCAACTGGTTCGGTAAAGGATGAGCACGGGCAGTTC  
ATTTGGCCTGGTTCAGAAAATCTTCGTGTATTA GAATGGATCTTCCGTCGTACGGATGGAGA GGATG  
CCATTGCGCACCGTACTCCGGTAGGATATTTACCTACAGCAGAAGGGCTTAATACATCGGGGCTTGATCT  
ATCCGAGGATGCTTTGCGAGCTTTGTTGACTGTAGATGCGCAGGGTTGGAAAGCTGAGGTCAGTAATATT  
CGGAAGTATTGTTGATTTTTCGGAGCTGATATGCCACAGCGCATTC TTGAAGAATATCCAGAATAGAAA  
GC GAATGAAATAATTA AAAAGAAACGAGTTTTGATTATTC TAGTTTAGATACTATTGTTTTTCTGTTTT  
AAAAACATTTTTTATTTTTTAAAATTAGAAAAACAATAGTTTTCTGGATGATCTCGTGTCAATACAACCT  
ACATCCATTTCTTTAACTAAGAATATAACGGCAGCTTTAGCCGGAGAGCAGGTCGATGCTGCTGCAGTGT  
ATATGCCGCAGGCTGTTTTTTTTCTTTCAGCAACTGGATGAAAAAGCAAGGGGCTGAAACGGGCTTTAGG  
ATGCTCGAAGAGGTTGATCTAGAAAAATTTATACCGTCTTTAGAAAAATCACCTACACCTATCACTACG  
GGAACAACGAGTAAAATTTCCGCTGATGGGAT TGAGATTGTTGGAGAGCTTTCTTCAGAAACAATTTTTGG  
CAGATCCTAATAAAGCTGCAGCTCAGTTTTTTGGAGAGGGCTTGCAGATAGTTTTGATGATTGGCTCAG  
ATTATCTGAAAATGGGGGGATTC AAGATCC TACAGCAATAGAAGAAGAGATTGTTACTAAGTATCAAACA  
GAACTCAATACTCTGCGCAATAAACTCAAGCAACAATCTTTAACAGACGATGAGTATACGAAGCTTTATG  
CTATTCCTCAAAACTTTGTTAAAGAGATAGAAAGCTTAAAGAATGAAAATAATGTGAGGTTAATCCCAA  
AAGTAAAGTCACTA ACTTTTTGGCAGAATATCATGCTCACTTACA ACTCGGTAACCTCGTTATCAGAACCT  
GTTGCCGATGCGATGAATACGACTATGACGGAGTACTCTCTTTATATTGAGAGAGCTACAGAGGCTGCCA  
AGTTGATACGGGAGATAACCAACACGATCAAAGACATTTTTCAATCCAGTTTTGGATGTGCGTGAACAAC  
AGGAATTTTTAGGTTAAAAGGAGCTGAGTATAACGCTTTAGAAGGCAATATGATTC AAAGCTTGCTTAGC  
TTTTGCGGGTCTATTC CGGCAGTTAATGAGTCTGACTGCAACAGTTGATGAGATAGGCGCACTTTATCC TA  
AAAATGATAAAAACGAAGACGTCATTCATACTGCTATTGATGATTATGTGAATTC TTTAGCTGATTTGAA  
AGCCAATGAACAGGTCAA ACTCAACGGTCTGTTGAGTTAGTATATGCTTATTATGCTAGTACTTTAGGT  
TTTTGCTAAGAAGGATGTATTC AATAATGCACAAGCTTCTTTTACAGATTATACTAATTTTTCTAAACCAAG  
AGATCCAATATTGGAGGCTTAGAGAGACTTCAAGTTTTAATATCTCCAATCAAGCATTGCGAACCTTTAA  
AAATAAGCCTTCGGCTGATTATAACGGCGTATATCTTTTTGATAATAAAGGAT TAGCGACTAATCTCTTT  
AATCC TACATTC TCTTTGATGTTGTGAGTCTCATGACAGCTGATCC TACGAAGACTATGTCTCGACAGG  
ATTACAATAAGGTGATTACAGCCTCGGAATCCAGTATTCAGAAGATTAATCAGGCTATTACCCTTGGA  
ACTAGCTATTGCA GAATGTGGGACTAAAAAGCGAAGCTCGAACCATCCAGTTAAATTTTTAATGCT  
ATGGTCAAGCGAAGAAGACCTTCGTAGAGACCTCTCCAATACAGATGGTCTATTCATCTTTGATGTTGG  
ATAAGTATCTTCCGAATCAGCAGTACATATTAGAGACATTAGGAAGTCAGATGACTTTCTCTAACAAGGC  
TGCTCGGTATTTAAATGATATCATTGCGCATGCAGTTAGCTTCCAAACAGCTAACGCTATTATTC TTTA  
GGGATGTATCTTCGACAAATGAACCAGCAGGAATTTCCCTGAGGTGATTTCTCGTGCTAACGATACTGTGA  
AAAAAGAGATAGATCGGAGTCGTGCGGATCTCTTTCACTGTAAAAAGCTATCGAAAAGATTTAA GAAT  
AGTGACTTCTATAAATGCGGATACTGAATTGACCTCATCTCAGCGTGCAGAGTTATTAGAGACGTTAGCT  
AGTTATGCTTTTGAATTTGAGAATCTCTATCACAACCTCTCTAATGTTTACGTCATGTTTCTAAGGTAC  
AGATTTCTGGCGTAAGCATGCCTGATGAAGTGGATGAGGCTTTTACTGCTAAGATTGGATCGAAGGAATT  
CGATACTTGGATTCAGCAGCTTACAACATTTGAAAAGTGTGTGATTGAAGGTGGGCGTAATGGTGTGATG  
CCTGGGGGAGAGCAGCAGGTTTTACAGAGTTAGAGAGCAAGCAGCAAGATTACACGTCGTTCAACCAGA  
ATCAGCAATTAGCTCTACAAATGAGTCTGCAGCGATTC AACAAGAGTGGACTATGGTAGCAGCAGCCTT  
AGCATTAATGAATCAGATTTTTGCTAAGTTGATCCGTAGATTTAAATAAAATCGTTTTAGAGGGCAAAA  
CGATTATGAGAAACCATCCGATTC CAGAAGGACAAAAGTATTTTTGTTCCAACAATAGAGACTGCGGCTCC  
TCGAGAACCGAGAGTCTCCCCTGCAGAAGTAGCAGCCGACTACACGCAGTTGCATGAGGCGGCAACGTAT  
CTTCAAGTATTTCAAGATTTATTGAACGATGCGCATCAGTTAGGACTAAATAAAAGAGTTCGTAGA GAGTT  
TGCGTCAAGATTTCTTAAAACAGGCTCCGAGATGCTTTTGATGCAAGCTCTATGGACTGAAGA GAGTCA  
AAGAGAAGCGCGTAAAAGAGAGAGAAAAGAGCTCCAGCAACA ACTAGAGTCCAAGGTAAGTCTCAG

GCATTGACGACTGCTAAGGAGTTGCATCCGTGGATGATAGTATTGTGAATAAGATGCCTTTTCAATCGG  
CTTTTGCATATATCCTTCTTGATAAGTATATTCCTGCACAGGAAGAGGCTCTGTATGCATTAGCAAGAGA  
GCTCAATTTTTTCAAGGTATGCACAGACATTATTTAGCCAGTTTTAGAGTTAGTGAAAAGTTTTAATAAC  
GCGCCTATCGTTTACAACCTTAGGCTCTTACATTGGGCAGACAGCAGGAACCTGCGAACCTTAAATATGGCT  
ATCAGATGGTCTTGGATCGTTATGAAACAGAGACTGGCCAGTTGAGAAAAGGATATTAATAAATGCTGAGAA  
TGCCAAGCAGCAGCTGGCACAGATTATTAAGAACGTAGAGGCAAATAATTCCTTAAACGACAGAGCACAAG  
ACTCAGCTCAAGGATATGGCAAATGGGTATATTCAGACTTTAGATGTCTGTATCTCCCAAATGCAAGAGC  
TGCTACTGGATGCGAGGATATCATTATATCCCTGGTAGAGATGAATACAACCTGCTTATGAGATTAT  
GGGATCTTCTTTTTCCGTAGTTACTTTACAAAACCTTGAAGGGAAAGGTTGTGATGGGGAGATCAATATT  
TCCTCTGGAGAAAACGAAAGGTGGGCTTTTTAAACTTCTTTACCTATTTTCTTGCAGACGTACAAGATTTTG  
GAGATTTAGCACAACGAATCAGTTGATGTTAGAACTACAAATGCGAGCTATGCATCAGCAATGGAGTTT  
AGTTACAGCCTCTCTGAAACTCTTACATAATGTATATAGAACATTGGCTTCTAGCTAGACATGAGAGGAA  
ATCTTCTTAAATCTCCCTTGAGGGGGAGGTTAAGAGAAGAAGGTTTCGGGGGTTAGGAATGGGAATCCCTC  
CGGAGACGTTACAGCGCGCTGGCTTCCCCTCTTCTTCTACGTTGTAGAAGAAGTTATCGGGGATATA  
GTTTGTGCGCTCCGATGCAGATGTTTCCACGATGAGAGCTGGTAATTTTACGAACTTTAAATTTGAGGTTA  
GTGAAGCGATCTTCTAATTTTTTGAAGCTGTGCTCCGGAGCTTGGCGAGAAAACACTCCCTATAGAAAACG  
CTAAGTAAGGAAGAACGTAGTCAATCACATAGGTAGTAAGACCTACGCAGACACTCCACTCCTGAAGTT  
CAGTTTCCCATCCGAGTCAGCGATGAATACTTCTGGATTAGCTTGACTGTTTGCAATGATGTAGTCAATA  
GGCAAGAAGCATGGCGATAGTCTGCACCGACGCTTACAAAGGAAAACGCCATCTTCCATATGACTTTTTT  
TCAAGCTAACATCCCAAACAAATCCGTAATTGGACTGTACTTCAATCATCCCGTCCGTAACCTCTGATTC  
AGAATTGAGAGGTTCCGAGGTGAAGTCTCGATAGGCATTCATGGGAAGGCGGTAGTATTGTTTTCAGTCTC  
CCTACTTTCACTTCGAAACTCACATCAAACAGAGGAATCGCGCTCAGCGAACGATCAGGAAGGGAAAAAG  
CTGCAGCTACACAGTTTGCATTGAGATTACAGTTTACGAGATCGAAATTTTCGCTTTTGGTTGTCGAAGT  
AATATTAGGAGAAGGACCAATCCAGCTGTTGTCACAGAGGTAACGACAGGGACATCTTTTACCTGAGCT  
TCTTCTGAAAAGATATAATCTCCGAAGAAGCAGAGCTTACAGTTACCGGACAGTGCAGGATAGTACATCAT  
AAGAATTACATAAATCGAAAGAACAGGCATTTTTCTGTTCAATATTAATCCCGGATGACTGGAAACGC  
CGGATTCCTCCGAGGCATAGCGTCAATGAAGTAGATGCGATCCCTAAAAAAGATAGGAAAGTCAAACGG  
AGATAGTTCACTAGCTTGCTACTCATTTAGTCAAGGGCCTTCTTTGTGGTCTGGGACTGAATCCGTATC  
TTTAGCAAATGCCAAAAAATTGTACAAAGGAAAAACATCGTCTCTCTAGCAGGGAAGGCGTTTTAGTCTT  
TTCTCATTGAAGAAGAACCTTATAAATATTCCTTCTTTGTATCACGTTGGAGAAGCTGAGCGATCCCTTC  
CTGAATATCGAGATTTTCTGATAGAGAACGCGATAGACGCTGGTGGTAATCGGCATGTCTATTCGTGTGT  
GTAGCAATTTGATGAGCAGAGAGCCGTGTACACCTTCGACCACCATAACCAATTTTTGTTTTAGCCT  
GTTTCCAGGAGTCAGGCTTCGGCTAGCAATTTCCCAAAGAGGGTATTTCTACTGAAAGCAGAAAAGCAGGT  
GGTACAGAGGCTCTCTAGACCTGCGAGCCATTCAGGTATCTGGACGGCATCCCATGATGGTGGCAAAT  
TTACGAATTTTATGCAGACCTCGGGTAACAAGTCCAGATTTAGCATTATCCCGAAGCGGAATCCGTCAG  
AGATTCACAGGCTATGGCGATTACATTTTTTCAAGTCTCCTTAAACGAACTCTTTTAGGTGCTATT  
AGGATAGACACGAAATGTAGGGGTGAGAAAAGCTCGATGAATTTGTTTTAGAGTATCAGGGTTATACGCA  
CTGATAACAACCGAGCAAGGGCATCCACGAAGGACTTCACTGGCAATAGAGGGCCACTGAGATAGCCTA  
GATGTTGCGCGGGGACGGCCAAATATTTCTAAAGCGATTTGCTTAGGAGTAAGCCTGTATTTTGTTC  
GATACTTTTGTGATGTGATTACTAGAGGAACGCGAAGCTCTGTCAAAGCTTTGAGTTGTGTTAGAACAGGT  
CTCATTCCTGCTGAGGTCACTCTTCTACAATCATCGTCTGCTCCATCTAGAGCTTCTTCCATGTGGTATG  
TGAAAGAAAGATTCGTAGGAATGGAGATATGAGGAGCTGCTGGGTGTCGACGTTGCACAGACAACGTTC  
GATCAGTGCAGGGTTCTTGTCCCATCCACTACACGATGACCATTATTAGCAAGAAGATTGGCGAGGGAA  
AATCCACCATGCCCATTCCTAGGTAGGCTATAGTCTCTTTCATGAGGCTCAATAATTGTTTCTGGAA  
AAATATCTTAGTTTCCCCTCTAAGGAAGTATGGGAGGAAGGGTAATAAAAAATCCGCTTCTAATTCAAAT  
ATTGTATTTGGAGAAAGTTTTCTTCCGTAACAGCAGTAAATAGAGCATGTTCTCTTTTGCAGATAGCTT  
CTCGAACCGTTGCAGGGCTATGGTTCCTTTCATAGTTTTTGGAGGAGCAAAGCATTCGTGGCGAGGATA  
TACAATGGCTTACTGTGTTGCTATATTGGAACAAATCAAAAATAAATTCCTCGAACTTCCAAGCATTT  
TTTTTCAAGTGGTAGAGGATGTAATGCTTAGCGTGTATTCCTGCTTTGTAAAGAGGAAGAGGTTGGTATG  
CTGTTTGTGCTAGAAAGTCCATAGATAGACAGTACAAGCCGATATTTGCAGTTTATAGGTGAGATCTCC  
CTCTGTAGTTTTTCCGCAACGTTCTTTAGTAGTGGTGTGGAGTATTCACAACCTGCAATTTTTTTGTTTT  
GCTAATTCGATTAAGACTCCAACATCTTCTTGTGCATTTGTGCTAAAGTAGTTTTGATAGTGACATCAT  
TGTGTTCCGCTGCATGAAAGCCAACGAGTTCTCTATCAAAGGCAATGCTAAGGATATCTATAGGGAT



TACACTAACCATTTCTATCCCTGCTTGATGCCATTTATCCAGATTCCTGAAGATTGTAATAATGTGGAT  
AGACAGCCATTCCTGTAGGTCCGAGAGATAGACGATCTTCAGATTC TAGGAACAGATCTCCGGATAAAG  
AAAGGAGAGGCCAGAGCGGCTGGCAAAAAAATCTACTTGGGAGGGAGACAAATTAATAAGTCGTTAGT  
AGCAAAGTAAGAGA GGGTCTGTTTATGATTAAGAGGGGAGGTCATAATCGTAATGGCAATGGTCTCCCT  
ACCCATTTGCTAGCCGCGGCTACCTTCTCTGCAACTAGTTGATAAAGAGGTTTTTTCTTTACAGAGGAAA  
CAGGATAGAGCCCTTTGGGCCCATCAAATTTAATCGCGATCC TTGGCCACCAGCTAATACGACGCAACC  
AACCTTACCTCTTTGCAATAGCTGGAAGCCCAGCTGGGCATAAGCA GGGTGTGCGCCAGCATAGTGTACA  
GGGGATAAGGGAGTATATTC TTGATGAGAGGCTTGA GGATTTTGTAGTAACGCTTGCTGACGAAGAAAA  
AAGGAATATCGATTTGAGCGATTTGAGTGCCTAACCGTAGCCTTTGTTGAGGGGGAT AACGAAGGCCAATA  
CTCTAATAAATGCTCCTGTTGAATAGGAAGCAGCTGATCC AATAGAAATGATAAATCTACATACGAGGAG  
TCGGTCATTGTAGGTGGCCTTAGTTATTCGCGCTCTTTATA GGATATTTACTGTCAT GGATCTTTTCGAT  
AATTTTTCTTTGGTCTAGTTGTTTTTGTATGTGCGCATAAGCATCTTTCAAAGACGTTTTTCAGGGCCTGA  
TGCTGTTTATATAGAGAAGTTTGCTCTCTTTGTAAATGTTCTAAATGTTGGTCATATTCATGGGTATATG  
ACCGACATAGGAAT TGTGTGCTTGTAAAGGAAATTTTCGCGATGTGCTCCTGTATTTGTTGTAAGCG  
ATGTTCTATTGTGGAGAGCGCTTTTTTTACTGTTTCCAACCGGTACGTTTCTTGAAAAGCTCAATAGTG  
AGCAGTTTAGACAGATCTTGAGT TTTTTATTCATGTTTCAACAGTTGGCACAGTTGTTCAATAGTTTCA  
TGAATAGCTGAGT AATGAGAAT AAGGTTGAGATAAAAAATGTTTTACGGAGGGGAGCAAACGAATGGCTC  
TATCGAGGTGAGCATCTTGCTCTGAGACATAAGCTCCTAGTT GGATGATATCAATAGCTTCATGATAGGC  
TTT GAGTAAGGAGAGAAGCTCTTGAGCTGCAGCATAATGATGAGGGAGAGCTAACTGACGAGAAGACCGC  
GAAAGCTCGTTAATACATTGATAGGAGGAGAAGAAAAGCTTTTTTCTTGAGGGGAGAGAAAAGAAATGCC  
CATCCAGAAGAGATTTTACATAATCAGTAAAAATATCT GGATGGTTTGCATAATGCAAAATGGCATAAAA  
AGATGTGATAGATCC TTTATCATTATTC CAGCACGTTCTAGGA ACTCTGCAACATGATGGAAAACGGAT  
GCAGCATAGTGGTGTGTAGATAGTGTCTCTCCTCTCGCGATCGCTACTTCTTGAAG GGATTCTATCCATC  
TAGATAAGGAATCC ATAGTAAATAATACGCGAGCTCCTTGATCTCGAAAATATTC TCGGATTGTGATTGC  
TGCGCGCCTGCAATGACTTTGCTAGCTGCAGTTTCTATAAGCGGTAGAGGCATGATAACGGTACGTTGA  
GCGGCTAGGCCTTCTTTGTGTTGGTTGACATAGTCGCGCACCTCACGACCACGTTCTCCTATTAGGGCAA  
TGACATTGATTGTCTGTTGGGA ACCC TTTGCTATCGTAGACAGAAGAGAAGATTTCCCTCCTCCAGGCTC  
TGAAAAGATGCCTACGCGTTGTCTTCTCCTATGGTAAGGAGGGCGTCGATTGCGC GGATACCTGTAGGG  
AATACCTCTTGGAT CGGAGTACGCGACATAGGAGAAGAGGGAGAAGAAAATAGAGGGGAAAGGTTCTGTTT  
TAGGGAGCTGAGATCC TCCATCTAAA GGGT TCCC GAATCC ATCAAGG ACTCTTCTAAAAGATGGTT GGA  
TAGAGGAAGAGAGGCAGGCCTGCGTAAGGGAAC TACTTCGGCTCCTATGGCAAGATAGTATATGGGAGTC  
AGAGC GAGTAATAATGTCGTGCGATTGT GAATGCCAATTACTTCAGCTAGAATAGGGTCTGACCGAGATA  
GAGAAATTTGACAGAGTTCTCCTAAGCATGCGGAGAGCCCTTGAGCTTCCAGAAGAGATCC TGATATGCG  
TGATAAAAATCC CACATTC TCGATACGGGCGCCATTGAT GGATCAACA GAGT TCTTCTGTAAAT GAGTC  
ATACCATGTACGTGGTTAGGGGATTC CTGGTTTTTTA GGATCTCTCGTACGTAATGTTTGTAGCTGATG  
CCGCTTTATG GAGTGAGTACACTTAGTAGATGGGACAGCTCTTCCCGATGTCTTGTCTCAGAATTC CTG  
AAGG GAGT TCTATTTTATAGCTAGCTTTCTTGCAAAA GGATCTGCAAT GAATTC GATATTTTT GAGTAA  
GGGAACATCGTGAA GGATTAACCATTTAGATAGGTTTGAAGATCTTCAGGATGTAAACCTATTTTTATG  
GGAGAGACGGCATAAGTAGCTAAATGATGTTGCAGAGCTGCGGAGATTAGGAGAGCAAGTTCTCTGTAC  
AGGCAAGCTTTCTGTACAGAAATTTTTCACAGACGAGGACAGCAAGTTCAAGAAGCTCAGGTTTTAGTTT  
CTGAGATAATTTTTCGATTTTCAGAGAGAAGATGGACAGATAAATTTACGGAACACCT GAATAAGAGAAA  
AGCTCATGGGAGAGAGCTTTTTGCTCAAAGAGAGGTGTTTCTAT GGGTAGTTGT GAGTTATCTAAACACG  
CTAGGGAACGAAGATGAGGAGAAGCCACGTAATCC TCCAAGTGTATGTTCTTAACCTCAACACAGCAC  
TCTTCATTTCTTCAGGAAGTTTATTAAGAAGTCTTCCGCTTTTGCT GAGTCTAGATAGGAGA GAATCAA  
TGCAACTTTTTCTGG GGATTC TCTTTTCATCATCTCTATCAGCTTTGGTATATTTATGCTCTGTATTTTT  
TCTTCTGTTGAGAGACATGGTCATAGGTATGAAAAGCAAGATAGAAGGTAGCAAAGCCTA GAATTC CAA  
GGCTTAGTAACACAATAGTAAT ACTC AAGACAATCGA GGATAGGCGAGAAGTTTGTGTGCTAC GGGT T  
TAGGAAAGGGACAATATCTACAGAC GGATGCATTTCTGA GAATGCTGAGAGAAT CTCTGCAATATGCGAG  
AGCAACTAACACGTGCACCTTTAGGAA GAGTATTGAGGTAGTCC TATCGACGAGAAGTTGCAAAATGGC  
CTTCATCCGCTACAG GAATATAGTTTAAGGCGAAAATGCGTTTTGAGGAA GAATCGTTTGTAGTGAGCGTTC  
TAATGAGGTAGT GAGTAGGGTATTACTTTGTTTGAAGAGCGGG GAGTAGAGATTACCATGCTGATCGGAC  
AAGGTGATATGTTCTTTAGTTA ACCCAGGGACGCTGCGTGTGAGGTAATCAGTGATT GAGTGCAC GAGTG  
ATGG GGATAATGTGCAAGCCTGAGGAAGAGAAA GGATCACGGAGATTTCTGCTAAG GAGTCTTCTCTTG

GGATAGAGCAACCGTTGCTTGGAGCACAGGCTCAAATAGAGTCAGATCTTTTTCTAATTGCTCTTTCTTT  
GCTTGGATTTCTATCGATTGAAGATTCCTAAATGGGAGAGCTTCAGCCAATGTGAGGGTTTTTTCTCTG  
TAGAGGCTACAGTAGGGTAGGCTGAGGAGAAGATGGTTTATACAACATGATGAAGCCAATAAGAATAGC  
TGCAAGAAGGTAGCCTAAAGATTTAGTGGAGGCGATCTTATTTTTTAGAAAGCGAGGTAGCACCGGCATT  
CTCCATGAAGTAAGTTCTTACAAAAGCTCCACGTATAGGTTGAGGAATAGAGCAAAGGTAGAGCCCGCTA  
AGTATCCTGCAAAGAAAAGGATGAAAAGAAGGCTTCTTCTTGTGAACAAGAAGAAAATTAGCATCCGG  
GATGACCAAGAAGCTCAAAGGGGCTCTCAATTAAGAGCCCTTTTGTCTTCTGTAACAAAAGAGGCT  
ATTAACAAACATAGGTTATCTAAGAAAGATTTTCGATAGGATTTTGAATCAGTTTAAAGGGATTTAAATA  
GTAGAGACTGTTTCGTCCACTTTTATTTCTAATAAAAAGGATAGACATGAGCTCGAAAGAGCTGCCCTATCGA  
ATTGAGGATAGATCCACAGAGGATAGACAGGACGAACAATTTCTTGGATAGGCAATGGTTACAGTAAGC  
CCTTCGAAATGAACGATGCGAACATCTCCGGAATCCACGGCGACGAGAGGTGCTATTTTCTCTTTCATCA  
TAGTATTC AATGCTGAGAGCTGTTCTCATGGGAGAGAGCTCCCCACTCTTCTGTGGAGTAGGGATCC  
TTCGCTAAGCTGAGATAGTGCATCTTTGAAAGGGAAAGGGCTGTCATTCACGGGAATATCCACACATTGT  
TCAATAGCAATGTCTAAGGCATCTATGACTAGATGGTAGAGAGGAGAGAGGCTTCTAGGAAAATGGAAG  
GGTGCGCGTGTCCGCGACTTCTTGGTCTAGATCATTAATTGTGATTTTATAACGCTTCGGCAAAAAGTTTT  
CCCAATGACTAAAGAGCAGGTGGCTTCAGCGAGTACAAGGAGATAAGGGTGTCCGAAATATTGAAATTTA  
GCTTCACGGATATAGCCATTGGTTTTGTCTACCAGCCAGTAGAACAGCAAAGTGTTCATGAGTAGGT  
GCCCTTGCTTTCTATGACAAGTTGTATTTCTTATCCCTCTTGGTCATGCGATAGGGCTCCGCCATGTTT  
AGGTTGGAAGAAAAGCGTAAAGGATCTTGCAGGGAAGCTCCCCATAAGGGGAAAAGGATAAAATGGAATC  
ATCATAAGGATGAGTAACCAGTGGTTGTAGGTGAGAGATCCCTTCTTGTAAAGCGGTTGCTAATGCAGA  
GAAGTGTGTAGTAGGATACGTTTACGTAAGAGATACGTGTAAGCGCTGTGGCATAAGAAGGGAGAGATG  
CCCGAACCTTTGTAATACTGCGATAGAGGCTGGAAGCGTTCATAGCCTAACCCACAAAATATTTTCT  
GGGAAAGGAAAATCCTAAGGACTCTGCAGGGATACCAGGAATAGCAAAGACAGCGACATTAGGGAGACG  
AGGGCCTGTCTTCCAAAAGGAATTCGACTTGAGGAATAGCGGAAAGAGCCTGTTAAGAGCTGCTCGA  
GAAGAAATAGCAGAAAGCACAAGAGAGGAGAAAGCGGTTGTACGTTCCGTGACAGGCAAGAGAAAAAGCTG  
CAAGAGAACTGAGGCAGGTAGGGACTTGTGGATTAAGTAGGAAGCCATAAGGAAAAATATTTTGTAAAGC  
GGGAGAAATAAACATCGCTCCTGAGGGACCAATCCACCAAGAGACTGTGAAGAAAAAGTAAGGATATCT  
GCTTGATAAGGATCTGCGGGTAGCGCGCATCTTCCATAAGATATCACTCAGGTCATGTGGAATAATACC  
CGCGTTCTTTACATAACGCAGCAAGCTCAGGGATCGCTTCCAGAAATCCTGTCATACCATTCGCAGCAGA  
TATGAAAACAGCAAGGTCCGCGGGGAAAGAGCTTCTGCTAGATCGGATTCCTTTACGCGGCCGTTTTTG  
CTGGTTACCCAATCATAGGTTGTCCCTAAGTTTTGCGACGGCAGAGAGCATTGATGATAAATGTTGCT  
CGCAAGAAGGAACAAGAAGGTGATTACGCCCTGGAAGGCATTTTGGTTTTCCAGAAGAGCGGCCACGAT  
AATGGCCGTGACATTCGGGTAATGAAAGAAATAAAGGTAAGGCTTCTCCTGACACCCGTGTGAGT  
TTGCGGGCAGAAGCTTCAGCTTCTGCTTGTAAAGTCAAGATGGAGTATTTGCGCTGTACGAAAATACGT  
CTGCGTAACGTTGAAAAGCCTCTTTCACCATTTCCGAAGGAGGGATGGCTTGTGTTGTTAACAAGA  
GAAGGAGCGTGTTCGTGAATTTTTGTCCCGTCCATTCGTATACAATAGGCTGTCTGTTGGCACTCA  
AAGAAGTACTTGTCTTCAGATAATTTTTCTAGGTCATAATTAAGGAGCGCAAGAATTCCTCGTGAGC  
AGAGATAAAAATATTTTTCCCTTGCTGAAGGAGAGGGAAAATTCCTCTTGAATAAGGGGAGGGTTCGT  
TGCCCTGTATCGAAAAGACTTTCGCCCTGAGGAGGGGCAATGCGGTAGCTTCGGCGCCACAGTTTACCT  
GTTCTTCTCCGAATGTAACAGCGACTTCTTGTATTTTTTCTTGGAGTCTCCGTACATGCGTTCATT  
GAGAGCGCTAGATTGAAAAGAGGGATCATCTGCTCCATTTCTTTTTGACTATGAATCCGGCTCATGTG  
GGGCGCTTTCATGAACGATATAAGGAACTTTTTGAGAGCTGTGGTTAGTCATTGCTAACAGGGCTGTCA  
TCAAACCTTAACCAAGGTGGAAGTGAAGATGCAATCAATAGGAAGATGTTAATAGATTCCTCAGCGGC  
AATAGCCTCTTGAATTCCTTGTGGCTAAGAGGGATGTCTACCCAGCCTGTAACAGATTTTTTTGATTC  
CATAAGGATGGCCATGGCGTAGCAAGATAAGAAGCGTCATAGAGAGCAAGATTTAAGGATGATTACGAA  
AGGCTTCATCTTCTTGTGCGGGATATCTTTGCAAAGATTTTTTACCTTATAAGGGAGGGGGAACTC  
TTCATTTGTGAGCCTCTTAGAGAGGAGAATTTCTTGGACTCTACTGAAATCTTGATATGATGGGG  
TCGTTTTTATTTTTACCTTGAATCTAAGAGAGTTCCTGGTGTGTTTCGGAGAGAAGGTTTCTTAGATA  
GTCGCTTATTAGTGAATTTCAAATATTAAGCAGTCGAAAGACAAAAGGACTGGCATGGCAAAGGTTCCG  
CTCAATAAATTTTTGGCATCAGCAGGAGTTGCTTCGCGAAGAAAGTGTGATGAGATCATTTTTGCCGGT  
CTGTTACCGTTAATGGTAAGGTTGGCTACAGGCCCTTTGTGACTGTTGATGAGGAGTTGATTCCTGAGA  
GGTAGGGGACAGCGTATCGGTGCTGAGAAAAAGTGTATTTTCATGGTGCATAAACCTCTTGGGTATCTT  
TGCTCTTCTGAGCGTAAATTTCTGGATCAAAGTTAGTGATTGACCTGTTGTGCGACTGCCCTTACCGGT

TGTTCACTGTGGGCCGTTTGGATAAAGAGACCTCAGGCTTAATTTTGGTTACGAATGATGGAGAGTTTCGC  
TAATCGGGTGATTCATCCCTCTTTCGGTATTACCAAAGAGTATTTATTGAAGGTAAGTCGGGATGTCACA  
GCGCGAGATTTAGAGACTTTGATGGCAGGGACTGTGATTGATGGGAAAGTGGTACGTCCAGTTTCAGTTA  
AGAAAGTCCGCCGGGACTATTAATAATTATTGTGAATGAAGGGAAAAACACGAAATTCGTCTTTTTGC  
AGAGGCTGCAGGGTTACAGCTTCTGGAACCTAAAAAGGATTCGCATAGGGAGCTTGGTATTAGGGGGCTTA  
CCTTATGGAAAATATCGGGAGTTGACCGATTCGAGTTAGATAGTTGCTTATCAGGGAAATCTGTGGCTC  
TCGTCGCTTAGATTAGAAAAGAGTTTGGTCTTAAGAACAAGAGGGAGGCTTTCTCCCTCTTTTTT  
TTGTTTAGAGGTACACTCAGGAATTAGGGGCTTGTAGATAACGAAACTCGGGAGCGGATATGCTTTTTTG  
GGGTATTTTTAGTTTGTGCTTAGGAGGGTTATTCGGGGTTATTGTCGCTTGCCTATACAGCAAAGGCT  
CTTTTGTATATCCTGCGCACAATCCTTCGGCTTGCCTTAAAAAAGAGAGGTTTTACAAGAGATCGCAG  
CGTTGCAAACATTCCTCTCCTTCGTTTAGAAGAGGAGATAGCCTTTTTAAAGCAAGGCTCCTCCTATTC  
TTTTGAAAAGAAATTCCTTAAAGCTAGTGATGCGGATGGAGTTACTTTCTATGAGATGGAACGATTTTTTACT  
CTCCGATTGAAACAGACATTAGCATCGTTGCAAGAAAGTTTGCATCAAGAGGCTGTCCAGCATTTAATGG  
AAGAACTACTTGCATATGGAATGCGTTTTCTTTGAGGCCTTTGCTTTTCGAAAAAGCCGCGGAAACCTA  
TACGACTCTTACGGTCAATCCGGTAATCCGATTTTCTGGGAAACTCTTTCTGTTTTCCGCAAATCTCCTTT  
CCGCTTTTAGATGAAGCGATATAGATACGAATAGGAGCTGTACGAGACGAATGAAAGAAATCTATTATGA  
AATAGCACGTACGGAATCAACGAATACGACAGCAAAAGAAGGGCTTTCTTTGTGGATCCCTATGCTCTC  
ACAGTGATCACGACCAGAGAACAACGGCGGGAAGAGGGAAATTTGGAAAGGGTCTGGCACTCCACAGATC  
AAGATCTTTTTGGCTTCGTTTTGTTCTTTTTAAAGTGTGAATAATGTGGACAGTGCCTTGTATTATTCGTAT  
AGGGACAGAAGCCGTGATGCGTCTCGGGGAATCGTTAGGCATTCAGAAGCTGTCATGAAATGGCCTAAC  
GACGTGTTAGTTTACGGGAAAAAATTTTTCAGGAGTGTGTGTGAGACCATCCCTGTTAAGACTGGAACGT  
GTGTCATTATTGGTATCGGTGTGAATGGTAATGTGGGTGCTGATGAATTGCTAGGTATTAATCAGCCTGC  
AACGTCCTCAGGAATGATAGGGAGGCCTGTAGATATGGAAGAAGAGCTTAAGCGGCTCACGAAAGAA  
ATCAAGCATCTTATCCAGACGCTACCCTTATGGGGCGGAATAGGATAGTTAGTATTTTGCAAAGCGT  
CGACTGTAGATGCTTTGTAAAATACCTAAAGAAGCCATAGTAGAAAATTACAGAAGAACCTCCATAAGAAA  
TTAACACCAAGGGGACTCCGGTAATAGGCAGGAGACCATCATCATGCTGACATTGATAAGTACGTGCAT  
GACCAGGTGTACGGTCACTCCTCCAGCTAAAAATCGTCCAAAATCATCAACCGCGACAGCCACAGTACGG  
CAGCCGAAACAGACTAAGTTGTAAAACAACCATAATACGAATAAGAGTCTTAATAGTCCGAATTCCTCTC  
CTATAGCAGGGAACACAGAGTCTGTATATCCGTAAGGAAGCCAGCCCCTCCCTGCGAATTCGCCAGATTT  
CCATCCTTGGCCTTTTAGCCCTCCTACTCCAATGAAATAAGAGAGGCTCTTTGGTGATGGTTGGAAGGG  
CTGAGCCGTTTCGTACTGATATTCCTTTAATACTTTAAGAGCATAAGGTTTTACCTTGTGATGAGGGATAA  
TCCAGAGAAGATTAGTAGAGAGCAGAATGCCCCAAGCGACAAGCACAGAACAGACTTTGACTAGTGG  
AGGATAGATATTTCCGAGATAAAAAATGGTAAGGGCTATTGGGCATAGCACCAAGGCTGTTCCAGATCC  
GGTCTTTCAAGATAAGCAGAAAAGGAATCCCAACAATAATACATGCAACGAATGCTGTGCTTTTAGAAG  
AAATCCGTGCTTTGCGCATCTCTAGAATATAGCTTAGCATAATGACAACGGCAAGTTTGGCATATTCGGA  
AGGTTGGACGCTAAGATTAATAATGGGTATGCGGTACCAGCGGTGTACATTTTGTACAGCGGGCACGAAA  
AATAGTCCAATAAGACTGAAAAGAATCAAGAATAGAGAACCCAAAGCCATCTTTGAATGATGGTAGT  
CTACATAAAGCAAATGAAGTAGGCACACCATCCTAGAGCAAAGTGATCCAACTGTTTTTTGCTTTTGGC  
AGAGAACAGCCCTCGTGAAGTGTGGACTAACATAGAAGAGGGATCTTGAGAAGAGATCACAAATCACACTT  
ATGCTCATAAGTGAATGATGACTACAAAGACCCACAAGTTCACTTGACGCAAGTATTTTGTTTTTTTCA  
TAACAGGGATGTTATTCGCGTCTTCCCAGGAAGGAAGTCTTGCTGTTCTGCCTACAGATATTCCT  
TCATTATACAATCGTAAGCGGTATGTGTTTTTTAAAGGCGAAGAGCGTTAAGTCCCACGATCACGGT  
GCCCCCTTTCATGCAAAATCACAGCAAGCCATAGGGGATCACTCCATCGATGCTGGTCTGAAATAAAT  
AAAATAATTGCTAGAGCTAAAGCAAGATTTTGCGAAACAATCCGACGAGTTTTCTTTGCTTTATCAATAA  
GCCAAGGGAGAGAAGAAAGCCCTTGGTTTTAAAGCACCACATCCGCGGCTTCTATTGCTGTTGCGCTTCC  
AGCTTCTCCATGGCGATTCCTACAGTAGCCTGAGCCAAAGCGGGAGCGTCATTGATGCCATCTCCTATC  
ATCATGATCTGCCGTGATTTAGCAAGCTCTTGAATTTTCGAGAGCTTGTATTATCAGGAGTCAGGTCGTAGA  
ACACCTCATCGATACCCAGAAGTCGAGCTGTATTTTCGGCGCTGATACGATGGTCTCCTGTGAGCATAACA  
TACAGGATACCCATTCTTTTTCAAATAGGATACGATATTTGCAGCATCGTGGCGTGGGACATCCCGGAAA  
TAGAAAAGGGAAACACGTTTTGCCTAAGCAAGCTATAGAACATGTGTCGCCGCTTCTTGAGCTTGCTGAG  
CGGTTTCGCGAAGCTGTTACGGTATTCCTCAGGAACGTAACGTAGCGCCGTCGAGACGCGCCCTACAAA  
GGCTTGTCTCCGTTAAATTCCTCCGCTTACGCCCTCTCCTGGTATCGTTGTGCATTTGTGCTGCTGGTAGC  
GACCGAACTTGCTTCTCAGTGAGGTAGTTGACAATGGCTTGAGCAATAAGGATGAGAGGACGACTGCTCCA

TAGCCAATACGCAA**GAAT**AAAACAGAGGCG**ATTCT**TGGACCAAATCTTCGC**ATCC**TGAACAGGTAAATC  
TCCTGTAGTAAGCGTCCCGTCTT**ATCC**ATAACTACA**GAAT**TGCAGGAGACTAGACGATCTAAGACTACG  
CCGCCCTTAAGCAAGACACCATGTTTAGCACAAGCATTAAATAGCGCTAAGATAAGCAATTG**GAAT**AGCTA  
TGATAAGAGCACAGGGAGAAGCTGCAATTAATAAATGCTAGAGCGCGGTAAAAGGCACCGTCTGGTCCGAG  
GAAAGGCAGTGTGT**GAAT**AGAGAGCCTCCTATAGCTATACATGCTGAGATAGCGAAGATGGTTAGAGCA  
TATGTTGAT**GAAT**AGCGGTCCAAACGTTGTTGTAATTTAGGTTTGGAGCTTTGCGCTTGAACAACCAGAT  
TGATGATGTGAGCAATCGT**GGATTCT**TGCACCGATGCGGAGGACCTGGAGATCAAAGCTCCCTTCTAAGTT  
ATGAGCCCCTGCAG**GAAT**AGT**ATCC**CCAATGCCACAAGATTTAG**GGAT**CTTTTCTCCAGTTAGATGCATG  
AGATTAATAGAAGAGGCTCCGT**GAAT**AATTTTCCCATCTAAAGGAACAACCTCTCCACTTTTT**ACTCGGA**  
**TAATTTCTCCAATTTT**GACGTTTTTGCCTAAAACCTTTTTGCAG**GGATCC**GTCTTGCTGAACG**ACCC**AAGC  
TACAGT**GGGT**GCTAAATGTTTTAAGGAAGCGA**GAGT**ACTTTTAGCCTTTCCGGAGACCATCGCTCCTAAG  
**GATTCT**CGAGATGGCAAAGAGGACCAAGAGCAAAGCTCCTTCCAAAGCCCCTCCAATGAAGATAGAACC  
AGGCTGCCGATGTCATGA**GAAT**ATCAATGTTTACGGTTCT**ATCC****GAAT**ATCTTCAA**GGAT**TTAATGAG  
AGCGG**GAGT**TCCCCTAAGAAAAAAGTAA**GAAT**GAGAAGTAAAGAGGAGAGAGCTGAT**ATCC****ATCC**AA  
TGAGAAAGAAGCG**ATCC**TAAGTATAAAGCCAAGGAGATATAGGCAGATTTTAAAGTTAAATTTTGGCTTA  
AACGACGGTTTTTTTTGAGAGAGCAGAGGGCT**ATTCT**CTTTCCGCC**ATCC**CTG**ATTCT**AAAAAATCGCT**GAG**  
**TAATTC**TCGAGAAAAATGGAGAGGAAAAAAGTTGCGGAGACATAGGCCACCTACTAA**GAGT**ATGAACATAA  
ATAATC**GGAT**CAAAGAGCAGCAGAGGCTAATTGCAGTAATAAAC**ATCC**CT**ACTC**CCCAGACAATGGCAGG  
**GGT**GATCGCGTTTTTTTTATCAGGCGGTTTTTACAGC**GAAT**AAAACGCCTATCATGAAGGAAGCTAAAATC  
GCTGCGATTGTATAGCTTACAGCAAGTGTAATTGGGGCAAATAG**GAGT****AAATCC****AA****GAATCC**CGCCAAGCG  
CTTTAACGTTTTCTTGCTT**GGAT**GAGG**AT**AATCTTCTAATT**GAAT**ATGCA**ACTCT**TTCTCGGAGCAT  
CGTACTTAAGAGAAGAGAG**GAGT**CGGAACACACAAAATCGAGCATTTGTGAGATCAGCGGCTCCT**GAAT**  
**CC**TTGATTTGCATAAAGCACCGCTA**ATTCT**TATGCGTTCTTGTTCT**GGGT**TTGTCTCGATCTCTTTCTTTT  
CCTGTAACATATTTCTATGCGTCACTTCTATGTAGGCCATGCTGCTTGAGCTCGCTTACAGCTGGTATA  
AAAA**ATCC**AACTG**ATCC**CAGTTGC**GAAT**AGG**AT**TTTTCCATAAGAGGTTACTG**GGAT**TGCAGGGACTAGA  
AAGAAGATGGTGC**GAAT**AAAAAATAGAACAACACCACAATCAATAGCATCACAAGTCAGGTGATACCAAT  
AACCTTTTTTTTGTCTGATGAGGCTCTCCTTTGCAGACTTTATGCAAATCTTGAACCTCTTTGACATG**ATC**  
**CT**CCCGAGATAAGTTACCGAAGTGCTCGT**ATTCT**TGATGCCATCGTGCCGCTCCTCTAGCTTTCTATCTCA  
CTATAAGGTTATCTTACCGTTTT**GGGT**AGGAGA**AT**CTCTTGTT**ATTCT**ATATAGGGCGAAGAACAGAAG  
**GAAT**GACGACAGAGCC**ATCC**GCTTGCTGATAATTTCTAAAATAGCGACCAACAATCTTGGCGTTGCC**AA**  
**TCC**AGAGCCGTTTAG**GAGT**GTTAACGAAGTGCAATTTACCTTGAGCATCTCGATAGCGTGTTC**GGAT**CGT  
CGAGCTTGAANAATCTCCGCATTTAGAAATAGAGGAGACTTCATAGAACGCTTTTTGTCTGGGAGCCACA  
CTTCTGCATCGATCGTTTTCTTAGCAGT**GAAT**GACATGTCTCCTGTGGAAGTAAGGAAAGCTGATAGGG  
**GAGT**TGCAGTTCAGACA**GAAT**TTCTTCCACAACATGAAGCATTTTTGTATAGACAACCTTCTTCTGTTCC  
**GGAGT**AGTGAAGCAAACATTTCTACTTTGTGGAAC**GATGG****ACTC**GCACAAGTCTCGTTCGTGAGCTC  
CTCCAGCGCCAGCCTCTCTGCGGAAGCAGG**GAGT**AAATGCAGCATAACAGAGAGGGAGATCTTGCTCATT  
TAG**GAAT**TTCTTGA**GAAT****GAATCC**ATTGAGGACGACTTCTGTCTCG**GGAT**AAGGAAAAGAGACCGATCT  
CC**ATCC**TCAACACGGTAATACTGTCCATCGAACTTAG**GAAT**TTGTCCTGAACCGAAG**GAAT**ATCTCGTT  
TAACAAGTAAGGGAGGGAGCCACAATTGAAAGCCATGTGCTTGTCTTT**ATTCT**AGAAGATAAGTAAGCAG  
AGCCC**ATTCT**TAGAAG**ACTC**CTTCATTACAATAAGCCGGCCAGCCAG**ACCC**TGTAGTTTTGGCAGG**GAGT**  
TTAAAGTCTAAAATTTGCAACGCTTCATTAAGTTGCATATGGTGTTTGGGAGGGAAAGGAAAAGTAGGTA  
CCTCACCGTGGCTTTAATCATTTGGTTTCTGTTTTATCAGGAGAACTGGAACATCTTCATCT**GGATA**  
ATTAGGCAGTCTCGCATGAGATCTTCTAGAAGTGCTTCTGTCTTGGCAAAGTTGTTCAAATGCAAC**G**  
**AGT**TGATCTGCAATAGT**ATTCT**ACTTCTT**GAAT**CAAGGCGTCAGCATTTCGTTAGCAACTTTAGCTTTAT  
**GAAT**CTGACCAGATAATACCTTACGCTTTGCAAGCAGAGCTTCT**GAATCC**GCCTTTAACTGACGCACAGT  
TTT**ATCC**AACTTAGGAGGCGTTCTAAAGAAATAGCG**GGAT**CTTTTTTTTTGAAGACGGCTTTTCG**ACTCT**  
TTTGGTTCCCTTGCGTATTAATCGTAT**ATCCAAC****ATCC**TTGCATCTCTTTCGCTATCTGATTTTT**CAGGTT**  
**GAGT**ATATGGAAGTTTGTCTGAGCAACAACCTGTTTTTTATGCGCAAAGCCGTTGCCTTAGGAGAAAAGG  
GAAG**GGAT**TTTTGCTCC**ACCCAATCC**TT**GGGT****GGGAT**GTGTGATTGTAAA**GAAT**GGTTGTGTGATAGGTGA  
AGGTTGGCATCAAG**GAAT**CGGTTCTCCTCATGCAGAGGTGTGCGCAGTTCAGATCAAAAATGTTCTTTA  
GAAGGAGCTGAGGTGTATGTC**ACCC**TAGAACCATGTTGTCAATTCGGTAGGACGCCACCTTGGCT**GGATC**  
TTTTAATTAAGTAAGGTTGCTGCAGTTTATGTTGGCTTACTAG**ATCCGGATCC**GCCTGTTTGTAAAAA  
AGGCGTAGCCCGTTTTGCAAGCAGCAG**GGATTCT**CCGTTTATGTTG**GGGT**AGG**GAGT**CAGGAGGCCAAAAC

TCTTTGCAACCTTATCTGTATCAACGAGAGCGGGGATTTGCCATGGGTAGTGATGAAAACAGCAGCTTCGC  
TAGATGGTCAGACCGCAGATCGAGGAGGATCATCGCAATGGATTTTCAGGAGAATTAGCTCGGGCGGATGT  
AGGGAACTTCGTGCAAGTCTCAGGCTATAATTGTTGGGGCTCGTACCCTTTGTTTAGATAATCCGCGT  
TTGTCCGCACGGTCCCTCATGGGATTTATATGAAAGACAGCCATTAAAGTGTAGTGGTAGATAGTCGC  
GAACAGTCCCATTAAGTCTAGGGTATTCGATCTCAGCTCAGGAGTACGCTATTTGCTACGACTCAACA  
GTGCCCTAAAGAATATATTCAAAAATTGAAAGATTTAGGAGTAGAAGTATGGGAATCTTCTTCTCATCAG  
GTCGATCTCAAAGGGCTTTTGGCTATCTGGCAGAGAGAGGGTGTTCACAGGTGCTTGTGAGGGTGGCG  
CGCAGCTACACTCCGCTTTCTGGCAACAGAAGCTCGTCAATGCAGGGTCATTTATTTGGGGGCCGAAGTT  
TTTGGGTGATCAAGGGCAACCTATGTTGCGAGATCTTCAGCTAAGTCTGGTTACAGCAGAACATGTAAGG  
ATTACAGAACTTCTTTAGTTAGGGATTCGTAAAAGACATGTTTTGAATGTTTGGAGCAAGAGAGTGTAG  
ATAAGAAAGGTTAAGGTTCGCAGAAAAGTAGAGTTTGTGTTATACTCTGCGCACAGCGAGGGGATATAGA  
CAAAGAACGTTTCCACTGGCTAAGTTTTCCTCAAAAACGGGGTAGATTGAGAATGTTTACATATGAAGC  
TGAGGATAGCGTCCGTACAGCAAGCGATAAAAGATGTCGCTGAAGGGAAATTTGTCATAGTTATTGATGCA  
GCATCTCGAGAAAACGAAGGAGACTTAATCCTTGCCGGAGAAAAAGTCTCTACAGAGAAAATGAGTTTTC  
TTTTATCCCACACGACAGGTATTGTCGTGCTCGCTCTCTCGAGAGCAGGCAAAATCTTTGGACTTGCC  
AGCCATGGTTCAAGACAACCAATGTGCGTTTTAAAACCGTTTTTACCCTTTCCGTAGATGCTTCTTCAGGA  
GTGACTACAGGTGTGTCTGCAGGTATCGCACCAAGACTGTGCAATTTGTTAGCTGATCCGGCAGCGACAG  
CCGAGTCTTTTGTTCGACCAGGGCATGTTTTCCCTTTGATCAGTCAACCTGGCGGTGTAGTTCAACGTCC  
TGGGCACACCGAAGCTGCTATGGATCTCATGCGGCTTGACAGGTATGCAGCCGTGTGGTATTTTTGCTGAG  
TTAGTCAATCCAGACCACTCTATGATGCGACAGCAGCAGGTACTCGCTTTTGTGAGCAACATGATTTAA  
CTGTTATTACTGTAGATGATTTGATTACTTATCGATATACCTATGATTCCTCGTTACTAAAATCTCATC  
GGCGGATTACCTACGAAATACGGAGATTTTTCAATCTATGTTTATGAGTCAATCATCGATGGGACCCAG  
CATTTTGCATTAGTTAAAGGAGATATCCATGAACAAGAAGCTGTTCCAGTGCCTGTCATTCCGAATGTC  
TGACTGGGGATATTCGGGGTCTTGTCTGTTGTGATTGTGGAGCACAGCTAGATATGGCGATGCGGTACAT  
AGCAGAAGAGGGGCTGGGAGTTATTGTGTATCTTCGAGGCCAAGAGGGGCGCGGTATCGGTTTTGACAT  
AAGATCCGCGCATATGCGCTTCAAGATTTAGGTTATGATACTGTTGATGCGAATCTTCAATTAAGGGTTC  
CTATAGATGCTCGTGAATATGGCATGGCTGCTCAGGTTCTTAAAGACCTTCAGTTGACAAGCGTGAGACT  
GATCACCCATAATCCAAGAAAATTTTTGAGTTACAGCGGTTAGGAATACACGTTCTTGACCGAATTATT  
TTGCCCGTCAGTATTTCTACCGAAAATGAGGGGTATTTGCGAACAAAAAAGGAACGCATGGGGCATTGGT  
TAGATCTGCCCGTTCTGGATGATGTGGAGGAGGAGTATGAAACCGTTGAAAGGATGTCCTGTGCTAAGG  
ATGTGCGTGTAGCTATTGTTGGGTCTGTTTTCAATTCCTCATCGCTGATAGGCTTGTGCTGGGGCGCA  
AGAACTTTTTTTCGATTTTCGGAGGAGATCCCTTCTCTTTAACAATTTGCCGAGTCCCTGGGGCGTTTGAG  
ATTCCTTGTGCGATTAAGAAATTACTTTCCACCTCAGGACAGTTTCATGCTGTAGTTGCTTGCGGAGTGT  
TGATTCAGGGCGAGACATCGCATTATGAACATATAGCAGATAGTGTGGCTGCAGGTGTTAGTCGCCATC  
CTTAGACTTCTGTCTTCCATTATTACATTTCCGCTGATTACTGCTCCTAATATGGAAGCGGCTTGGGAGCGC  
GCGGGTATCAAAGGGCCCAATTTAGGCGCTTCAGGCATGAAAACAGCTTTAGAAATGGCATCATTAATTC  
CTCTGATAGGGAAGGAATAAAACGGTGTAGAAAAAGAAGAACGCCTGATCAAATCAGGCCTTTTTTTTGA  
TTATAAATGGATACTAACGGTTCATTTAAGTGAATTTGAACAGCGACATTCCTCGGAAAAGATATCCAAT  
CCTTGGCAAGAAGCTGCAGTTTCTGAGAAATCTAAAACAATTTCTTAGAAAAGAAATTTGCTTGTTTAGCA  
TTTCTTTATGCGCTTTCAGACTCTTTGCTACTAGCGATAAGGGTAGTTGCATAAAATTTGCTGAGATCGAGC  
TTCTGCATTGGTATTGCCACGGGCGAGTTCCGCTCAGTTCGGATACAAGTGTAGGCAACCCTCGCAGAGAA  
AGAGCCAACGAATCGCCCTTATTGGTATAGAACTATTGACCAAAGTATCCGCTTCTTCTGTAGGAAGGG  
TTTTGAAGCTTGTGGTTAAAATCGCAGCTTCGGAAGGAGACAAGTTCATCAAGGTGGCCATTCCTACTAA  
AGCCATCTCGGATCGAGAAGAGCCATCAAATCCTAATCGATTAGCTCGGTAAGTAAAATAACGAGAAAAG  
GCCTCTTCTACAGTAGCGTATTGTTGCAACATGGACTGTAGAGGTGCGAAGTTTGTGTGGAATTGAGAGG  
ACATCCCTGTTCTCCACAGGAATCCAAAGCATAGAGGTACAAGTCCAGAGCTAAAAGAGCTCGTTGCCA  
GCGCCAGCAGACAGAAGCTGAAAACCTGGGGTGTTCGTGAGCGAGAGTAACTCATCGTAATTCGCCAAT  
TTTCTCAAGGAGAAGAAGAAGTFTTCTGCTCCGGAGAGAGGGCAGCAAATGATGGGCTTAGCTCTGGGA  
AGGTGTGTAGTACATGCAGAGCCTTAGTGTAAAAAGTCTCTCTTTGCATTTCTGAGAAATAAGGTTTAAA  
CGCAGCAACAGCCTTAGTTGAACAGCCTAAGTGACGTAAGACGATAGCTGTCTCTAACACTTTAACAGAG  
TCATAAAATTCCTTAGGGGAATTTAAAAATAGAGTTAATTGCTTATGCAATGCAAGGAATTTGCTTAAATG  
TTAGAGGGGATTCGCTGGTCTGTAGTTGGATCAGTTGAGCATAGGCTTGGCGGGAACCCCTGGATTAATAA  
ATGTAAGTGAATCAAACCTGCGCACTGCGATATCGAAAGCAGGGACCTTTTTTTTGAATTAATGTTGGAGAA

AAGATGGCTCCTGAAGGAGATTTTAAAGAGGCTCCCGTAGAGGACGGCTCTACTAACCATAAAAAGCTCTG  
GATATTGGCGGACTTTTTGTTCAATCCAAACTTCTGATCCAATTTTTGTGGTCGAGCTAGGAAGCGTTCC  
GCGAGTTGAGGTGCTGAGAAAACAGGGACACTAGACAGTGTGACAAGGAACAAAAGACAGTTGCGAAAG  
GTAAAGTTTATTAACATATGATCCCTCTGCTACTCCGGGCTTCATCCCTTCTTAATACGGATAGAGGG  
GTAAC TTGTAAAGAGCTTAACGGG GAGTGTGTGGTTGATATCAATAGCCGGTGGCAAGCCTATAAAAAG  
GGCGTTGCATAGAGTGTATTC AAGAAGCAAAC ACCCTGTAGTTCTCTGGATTC CCCGAGAGATTC TACCG  
GCTTCATGCTAACATGATTTTTTGTAGGGGCAAGGTTCTTGCAAAGATCTTTTCATTCCTACCCAGAGA  
GGATAGAGAGGGAT TGTTAAGATTTTAATTTGATTGGATGTTGAAGCGCCTTTATAAACTATTTAGTTA  
ATAAGATTTGTGCTATAATACTACAAATTTATTTTAAATTTTGGCAGGTTTATGAAAAGTTTATCTATA  
AGTATAGCTTTGGAGCTCTCTTGTGCTCTCCGGGCTCTCCGGAT TGAGCAGCTGTTGCGCCA ACTCTTA  
TGGATCGACTCTTGCAAAAATAACAGCCGAGATAAAAAGAA GAATCTGTTATACTTCGCGAGAAGCCGGAT  
GCCGGCTGTAAAAGAAATCTTCTTGTACTTGAGAAAATTTTTCTCGCGCAAGAAACCTAAAGAGAAGA  
CAGAGCCTGTGTTGCCGAAC TTAAGTCTTACGCAGATCCAATGACAGATTC CGAAAGAAAAGACCTTTC  
TTTTCTAGTGTCTGCTGCTGCTGATAAGTCTTCTATTTGCTTTGGCTATGGCTCAGGGGGAAATTAAGGC  
GCATTATCGCGTATTAGAGAGATCCATCCCTTGCATTGTTACAAGCTCTTGCAGAAGATCC TGCTTTAA  
TTGCTGGAATGAAAAGATGCAAGGACGGGAT TGGGTCTGGAATATCTTTATCACAGAATTAAGCAAAGT  
TTTTTCTCAAGCAGCATCTTTAGGGGCTTTCAGCGTTGCAGACGTTGCCCGGTTCCGCTCGACCTTAGGA  
TTAGACTCGGGGACCGTTACCTCAATTTGTTGATGGGAAAGGTTGGGCTGAGCTGATCGATGTCGTGATTC  
AGAAACCTGCTATATAAAGGCCATTC TAAAGGCCCTTCCCTCCGGATAGGAGAAAGGGGGCTTTTGTAT  
TTCCGCTTATTTGCCTCCGAAGCGGGT GAAAGCATAAGAGTAGTAGACAATGTTACAGTTTTTAAAGC  
AAATCAATCACTTTTTAACTTCTTTTTGTGTATTCCTTTGATTC TTTGTTGGGAGGGATACTAATTG  
GAAATTACGAGGGCTACAGTTTACTTCTTTAGGAATGAGCTTTTCGCTTGATGCTGAATTAATCAACAGGAA  
CAAGCTGGTGCAGAAGGAGAGGGGGTCTCGCGCTATGAAGCTGTAGCAGGTATGTTAGCAGGGAAC TTTG  
GTACAGGGAATATTGCAGGGATGGCGATTGCTGTCGCTAGTGGAGGCCCTGGGGCATTACTTTGGATATG  
GATCGTCACTCTTTTTGCTGCAATAGTCCAGTATGCAGGCGCTTCCCTTGGATGTAAGTACCGCCAGTTC  
CAAAAGGAATCC CAGGAGTATATCGAGGACCGATAGCTTGCCTAGGATATAAAAATGGGCAGCCGATTC  
TGGCTGTTGCCTTTTGTGTCGCTAGCTTGATCACAGCATTTTCTGCAGGGAATTTAGTT CAGGTTAACAG  
CATTATCTCTCTTTGTGCTGATGGGTCTCAGCGAAGATCGCAGTAGGGATACTGCTCGCGCTCTCTGTT  
TACCTATTTTAGCTGGCGAAATACTCGAGTCTCCGCTTCTCTGCTAAAGCGATTCCTTTCTAGCAG  
GATTCATTTCCCTTTCTCCGTTATAGTTTTGGCTATGCATTGTGATAAAAATTC TCCCTGCTTTGCAGCT  
CGTTTTCTCTTCTGCTTTAGGTGCTCAAGGCTGGATAGCCGGGGT TGGGGGCTATACATTAGGACAGGTA  
ATCTCTACAGGAT TAAATCGTGCTATTATGGCTACAGACGGTGAAGCGGAATGTTTCTATTC TGCAAT  
CTAATTC TAAAAGCACGAATCC TGTGACAGACGGAT TAGTCACTCTCTTACCTCCGTTATCGTTGCGGT  
CGTATGCTCTATTACGATGATGGTCTTCTTGTGACAGGACCTATGATTC TGGAGAGTTAGGGTTTTG  
ATGGTTATGAATGCTTTCAAATCTTCGTTAGGCATGTTGGCGGAAGTGTGTTCTTATATCCATGATCT  
TGTTTGGGTATACTACAGCTCTGTCATGTTTGGCTTGGCGAGAAAAGTTTGAATATATGATCC CAGG  
GAAGCGGCTAACCTATTGTTGAAGGCTATTTATATCGCGATAATCC CATGGGTGGTGTCTTAGGAATG  
CAGTTTATCTGGGCGCTATCCGATCTAGGTTTTTGGCGGGATGGTTATTTTAAATTC CATCAGTTGATCG  
CCTTGTTCAGAGAAGTAATTGCCACTCGGTATGAGGTAGCCCTTCTCCGTAAAGAAGCGCAAGCCCAGTC  
TGATCCACTACGACAGTAGTACAA GAATAGGGCCACGCTTTACAGAGCATGGCCCTAAATACAGGAGACC  
TCAATTATGCACTCACCTCACAAGCTTTTTCTTACGGCCGTCGATTCCTAAAAGTATTCGTGTCAGG  
GCGTTGGGATCTCCCACCGCTGTCTTTTTCTGATGTCCCTAGAGAGGCTAAAAGTCTTGTCTTATTGT  
TGAAGATCCAGATGTTCCCTCCTAGTGTTCGAGA GGATGGGT TGTGGATACACTGGATAGTGTATAATCTT  
TCGCTGTAGTCTCTAATCTTGCAAGGAGCACAAATTTTTGCTGTCCAAGGGT TAAATACTGCTGGAG  
AAATAGGATACTGCCCTCCTTGCCCTCCAGATGCGAAGCATCGCTATTACTTTTATGCTTATGCGCTCGA  
TGTTGTGCTTTCCGATGAAGAAGGAGTGACCAAAGAACAGCTGTTAGAAGCTATGGACGGACATATCATA  
GCTACGGCAGAGCTGATGGGCACATATGAAAAGACTAAATCAGAGATTATTC TCTTGGGGAACGAATT  
CTCTCGCTTTTTACGGTGTTC AATAACAACGGACCATAGTGATAGCAGAGCTCTTCCCCAGGAA GAAT  
GTCTTTGATTGCC GAATGATAATATGGAATATCCCGTTTTCAAAGGCCCGATCGCTTCTAGATTAGGG  
TTGTCACTGTGATTAATAAACC GAGT CACATTTCTTGCATCCCGCTATCAATAGTGAATAGCGGAACG  
AATAGCGGGGACC GGGTAGCGGAAACAGTAATCGTTTTCATCTAGCCAAAGAGCCTGTCTTCGACGCAA  
AATCCCTGTATATTC TCCGATGTAGCTCCATGCCG GGATGGATTCACGAGCAAAGACTCCATATCC TACA  
TAGGAATTAATCC AACAGATGGCCACTGGAGGATTTTTTGGAGCGCGGAGATGTTGCTTATGGAGCTGCC

CTAGCCATTTGGCTAGAGAGGAAACGGCTAAACGTTTTTCTTCTCGATAACATAATCGTTGAATGCGTTG  
TTTGACCGCAGCATTTTGAATTGTAATTCAGGAAGAAATGAGAACGCAAAAGTTGTTCAACCC TTCGT  
ACGGGATAGGGAATGGCTGAGTCAATCCCTCCGTGTAACGAGAGATACAAAGTGTCTTGAGTAGAGTTAG  
TGGTCATACAAGGCTCGGAGCAGAAAAGAAAATAAGGATCTGTAATGCCAGAACTTTGAGCAATTACGGGA  
TGAACATCTGTGATCTCTTGAATGGCAGACGTCACGTATTCAAAGCTTGCTCTGCCGTATTACATTCGA  
GAGAAAGATGTGCAAGATAAATCTTTTTGATTCGAGGAGTGAGAACGCGTTGAAGTAGAGCGCCGACTC  
CGCATTCGAGATATGGCCTTGCTTGCTGAATGCGTTGTTTGCAGCTCTCTGGTCGTGAGGATCGGAGA  
ACCATTTCCGGATCATGGTTGGATTCATGAGTAGGTAGTCGCAATCACAGAGAAGGTGTGTAATCC AAG  
AGGTGACCCATCC TAAATCCGTGCAAAAACC GAGTTTCATACCA GAATATTGAAAAGATAAACCC TACGGG  
ATCCACTGCATCATGCGGAACATTAACGTTTGCACGCGGAGATCTTCTAAAGAAAAACGATGCCAGTT  
GTAAAGATTTTAAATGTCGGACACAGATCTAAAAGTTGCCGTAAGCTGCGCGCTGTTTCTATGTTACATA  
TAATGGGGTTCTATAGGTTTAAATAAACTACGAAGCCCTGCAATGTGATCCGAGTTTTCATGGGT AAC  
AAAAATCCCTTGAATATCTTCA GGGTGAATGCCATA GAATGTAAGGCCTCGGTAACGGCTTGTTTACTA  
ATCCCAAGATCTATTAGTAATTTACATGACCTTGTTCCATAAATAAGCACAGTTCCCTTTGGAACCAGAGG  
CTATAGGGAAAAAACCTTCCATGGATTAATCGTCTGATTTGATAATTGGACTAGTATTTGACGCGGTTT  
AGCTCCCTCTGAGGGCCCCACGATTC TAGCTTCTCTAACTGGTCAATGATGCTAGCCGCTCTAGCGTAA  
CCAATTTT GAGTTTCTTTGGAGGAAAGTTGTGCGAGGCATTTCTGTCTGTAAAAACA GAGTTTAGCTT  
GGTTAAATAATGGATCTAAATCTTCA GGATCCATAGAACC GGATCGTCATAGGTATTA AAAAGAAG GGAT  
CACATATTTGCATGG GAATCTTGAACATAAATCTTTAATGACTTTGTTGATGTGTCATCGCAAAATATAG  
GCGCCTTGAACACGAACAGGCGCAAAAG ATCC TGGAGAACTACTAGCATATCC CCATTC CCGCATCAAGT  
TTTCGGCTCCGGGCTCATCAATGATAATTTGGCT ATTC ACTTTGTTGGCAACTTTAAAGGCG ATTC GAGA  
AGGGAAGTTTGCTTTGATTAATCC TGTGATCACATCTCGAGAAGGGCGTTGTGTTGCTAAGATTAGGT GG  
ATTCCTACAGCTCTAGCCATCTGAGCTAAGCGTACAATAGGCGTTTCGATATCATGAGAGGAAGAAAGAA  
GTAAATCAGAAAGCTCGTCAATGATGCCAACAATAAACGGCATTTTTTCTGGGATCTCTTTATCGTACGA  
AGCTTCGATATCCACATTGCGAGT TCGA GAAT TAAA GGAT TGGATGTTTTCGTAGCCCTAAAAATCGAAGA  
ATTTTCATAACGTAGTTCCATTTCTCGAACAAGCCAAATTAAGCGCTATGGGCTTCTTTAGATTC TGTGA  
TAACAG GAGTTAGCATATGAGG GAGTTGCGAGTATCC TGTTA ACTC TACTTTCTTAGGATCCACGATTAC  
GAGT TTTATGTCTGTAGGGGGAGAAGTCATAATAAGAGACATAACAATCGTGTAAATGCAGACAGATTTT  
CCAGATCCAGTGGTTCCGTCAATAATTAATGGGGCATGGTTGCCAAATCTGTCCAAAAGTTATCGCCAT  
TAGCTTTTTCTCCCGAGAAGAAGAGGAACCTTGGAGTCTGTTGTGTTCCTTTTTTGGTAATCTTCTAATAAATC  
TCGGAAGTTAACGGGCTGAGGATCTGGATTGGGGATTTCAATTCCTACCCGAGCTTTCCAGGGATAGGG  
GCGATGATGCGGATGCTAGAAGCTTGCAAGTTCAATGCAATATCATTTTTCTAAAGCTTTGATTTTTTGTA  
CTTTGACTCCAGTGTGGGGAGGACTTCAAAGGCGGCAAGGGTGGGGCCGAACAAATGTTCCCAATAGC  
AGCTTCTATTCCAAAGCTAGCCAATGTTTGTGTAAAATAGCAGCTTTCTTTTTTAATTC TTCCAAGAGA  
GATTC TGGGCGGCGCAC ATTC CGCTT ACTCAAGAGATGGTATTGTGGTAAGTCCGGGGCGTCTCTGTGCTA  
GTACAAATGGGGATGGGGTAGGTAAAGGCTTGTAAGATGTTTGTGCAGGAGCTGAAGCC GAGTCTTTTCGG  
CAAAAGATTAGGAAGATCAGTTCTTTTTTGAGGCGATAATGTTCTTTTTGTGCGATGCGGTGGGGT GAGA  
AAAAATGGTGCGGTTCACAGAG GAGT CATCGTGTAGATCTTTATTTTCCAGAGGAAGCGAAATCACCG GGG  
TTGGAAGTTTGAGCATTTCTTTTTTAGCAACAGAAGGCGAAGATGGAACGCGAAGAGAGGGTTCGGGGAC  
ATAAGACTTATTGTTAACAAGATTTTTTAAAAGCTTTTTTGCAGGCGTTCCAACATGCGTAAAATTTGTTT  
TTGAGAAATTTTAGGAGATCGTCTAGGAGAGCTTTTTTTTTTAAACAAAAAGATTTAGGGAT AAGATAAA  
AGATCGCGCATAGCAATATGGCCAGAAAGATTAATCC TGTCCCACCTGCACCAATTAACAGTTTTAAAGA  
AAAA GAATTTCCATCGTACAGTAAGTAAAACG GAATGCCCCCTAGGTACGCTTTAGGAGGTTGAAGATCC  
ATGACAACCATGGGC ACTCTTTGTAGCTAAAAACTGTGGAAGGTTTGTAGCTGGAGAAATCATAGACAATA  
ATACTGCGCAACAAACCG GAAT TGCGCCAAAAGCTGCTGCTTTTCTAAAAGCTAAAGGAGCTG GGGT TCT  
CTTCATATTTAGAAAAGAAAGCC ATCC AAAATTTAGGG GGAT TAAAAAGGCAGCGACACCAAAGTTATAT  
AGCAAGAAGGAGCTGAGAGACCAGCC GAGTAAACCT ATCCAGT TTTGTGTGTAAGGTTGATTATGTTGGA  
AACTC CATAGACTTA ATCCAGAGAAACAGGCTAGGGCTAGATACACGCATGTTTAAACAGCAAAGACTGT  
TTGTGGAGAAAGAGAAACGCTTGCTTTCTTCCGTTCTTTTCCCATAGTTCCCTCTCTCTTATCTAAC TGAT  
AAGGACTC TTAACAGAAATAGCGCTTATATGGAGGTGTTAGCCTATCATTGCGGAAGCTCTCAACG ATCC  
TAGC ACTC CAACGCACATGTGTAGCTTGTTATAACAGGAAAAATAAAA GAATCGAAGTAGTCTTTTTTAGG  
AAACTATAAAGAAGGGCGAACGACG GGGTTCGA ACCCGCGACCTTCGGAACCACA ATCCGACGCTCTAAC  
CAACTGAGCTACGTTCCCATGGTGAA ACTC CCAACTAGCAGAGCGTGCAGGCGCTCTACGTTGGGGAA



AGAGAAGTATAATGAAGAGATTGTTTTTATGGAAGATCAAGGTGAATAAAATCTAAAGCGGTGTTTTTGA  
AAAAGGAAGCGAAGATGCAAAAAAAAAA GAATTTTCGACAAAAAATCGAAGAGAGGAA GGGTAGGATGAGC  
AAAAAAAAAGAAAAAAGAGAGGAAAATTTTGTTTTATAAAAA GGGTTGAGGATAGTGTGTGAGGGGATAA  
ATTGAGAGGTTAAGAAAAA GGGTTTTTTGGG GAGTTGATAAAAAATAGGTGCATAAAAAATAGGGGGTAG  
CATAAGATGTAGCTTCTTTTCGAACGAAGGTTGAAGGAAGGCCTCTTACGTGGATGAGAGGGCGCGACAG  
AGTGGAAGGCTGAGAGGCTGGAAGCTTTTCTTAACAATGCAAATGAGATAGAATGCAGGCCAGTATAGAT  
GCTTGTGA GGATTTCTTAAGAGATTAAGGAACCCGTTAATAAATCAAAGTATATATTTTTTCTGA GAATTT  
GATCTTGTTTCAGATTGAACGCTGGCGGCGTGGATGAGGCATGCAAGTCAACGGAGCAATTGTTTCGGC  
AATTGTTTAGTGGCGGAA GGGTTAGTAATGCATAGATAATTTGTCTTAACTTGG GAATAACGGTTGGAA  
ACGGCCGCTAATACC GAATGTGGCGATATTTGGGCATCCGAGTAACGTTAAAGAAGGGGATCTTAGGACC  
TTTTCGTTAAGGGAGAGTCTATGTGATATCAGCTAGTTGGTGGGGTAAAGGCCACCAAGGCTATGACGT  
CTAGGC GGATTTGAGAGATTGGCCGCCAACACTGGGACTGAGACACTGCCAGACTCCTACGGGAGGCTGC  
AGTCGA GAATCTTTTCGCAATGGACGGAAGTCTGACGAAGCGACGCCGCGTGTGTGATGAAGGCTCTAGGG  
TTGTAAAGCACTTTTCGCTTGG GAATAAGAGAAGGCGTTAATACCCGCTGGATTTGAGCGTACCAGGTAA  
AGAAGCACCGGCTAACCTCGTGCCAGCAGCTGCGGTAATACGGAGGGTGCTAGCGTTAATCGGATTTATT  
GGGCGTAAAGGGCGTGTAGGCGGAAAGGTAAGTTAGTTGTCAAAGATCGGGGCTCAACCCCGAGTCGGCA  
TCTAATACTATTTTTCTAGAGGGTAGATGGAGAAAAGG GAATTTACGCTGTAGCGGTGAAATGCGTAGAT  
ATGTGGAAGAACACCAGTGGCGAAGGCGCTTTTCTAATTTATACTGACGCTAAGGCGGAAAAGCAAGGG  
GAGCAAACAGGATTAGATACCCGTTAGTCTTTCGCGTAAACGATGCATACTTGTATGTTGGATGGTCTCAA  
CCCCATCCGTGTTCGGAGCTAACCGTTAAGTATGCCGCTGAG GAGTACACTCGCAAGGGTGAACCTCAA  
AAGAATTGACGGGGCCCGCACAAAGCAGTGGAGCATGTGGTTAATTCGATGCAACGCGAAGGACCTTAC  
CTGGGTTTGACATGTATATGACCGCGGAGAAATGTCGTTTTCCGCAAGGACATATACACAGGTGCTGCA  
TGGCTGTCGTCAGCTCGTGCCGTGAGGTGTTGGGTTAAGTCCCGCAACGAGCGCAACCCCTTATCGTTAGT  
TGCCAGCACTTAGGGTGGGAACCTAACGAGACTGCCTGGGTTAACAGGAGGAAGGCGAGGATGACGTC  
AAGTCAGCATGGCCCTTATGCCAGGGCGACACACGTGCTACAATGGCCAGTACAGAAGGTAGCAAGATC  
GTGAGATGGAGCAAATCCCTCAAAGCTGGCCCCAGTTCGGATGTAGTCTGCAACTCGACTACATGAAGTC  
GGAATGTCTAGTAATGGCGTGTGAGCCATAACGCCGTGAATACGTTCCCGGGCCTTGTACACACCGCCCC  
TCACATCATGGGAGTTGGTTTTACCTTAAGTCGTTGACTCAACCCGCAAGGGAGAGAGGGCGCCCAAGGTG  
AGGCTGATGACTAGGATGAAGTCGTAACAAGGTAGCCCTACCGGAAGGTGGGGCTGGATCACCTCCTTTT  
AAGGATAAGGAAGAAGCCTGAGAAGTTTTCTGACTAGGTTGGGCAAGCATTATATGTAAGAGCAAGCAT  
TCTATTTTCATTTGTGTTGTTAAGAGTAGCGTGGTGGAGACGAGACATATAGTTTGTGATCAAGTATGTTA  
TTGTAAGAAATAATCATGGTAACAAGTATATTTACGCATAATAATAGACGTTTAA GAGTATTTGTCTT  
TTAGGTGAAGTGCTTGCATGGATCTATAGAAATTACAGACCAAGTTAATAAGAGCTATTGGTGGATGCCT  
TGGCATTGACAGGCGAAGAAGGACGC GAATACCTGCGAAAAGCTCCGGCGAGCTGGTGATAAGCAAAGAC  
CCGGAGGTATCCGAATGGGAAACCCGGTAGAGTAATAGACTACCATTGCATGCTGAATACATAGGTATG  
CAAAGCGACACCTGCCGAACGAAACATCTTAGTAAGCAGAGGAAAAGAAATCGAAGAGATTCCTGTGT  
AGCGGCGAGCGAAAGGG GAATAGCCTAAACCGAGCTGATAAGGCTCGGGTTGTAGGATGAGGATAAAG  
GATCAGGACTCTAGTTGAACACATCTGGAAGATGGATGATACA GGGTGATAGTCCCGTAGACGAAAGG  
AGAGAAAGACCGACCTCAACACCTGAGTAGGACTAGACACGTGAAACCTAGTCTGAATCTGGGGAGACCA  
CTCTCCAAGGCTAAATACTAGTCAATGACCGATAGTGAACCAGTACTGTGAAGGAAAGGCGAAAAGAACC  
CTTGTTAAGGGAGTGAAATAGAACCTGAAACCAGTAGCTTACAAGCGGTCGGAGACCAATGGCCGTAAG  
GGTCAAGGTTGACGGCGTGCCTTTTGCATGATGAGCCAGGAGTTAAGCTAAACGGCGAGGTTAAGGGAT  
ATACATTCGGAGCCGGAGCGAAAAGC GAGTTTTTAAAAGAGCGAA GAGTCGTTTTGGTTTAGACACGAAACC  
AAGTGAGCTATTTATGACCAGGTTGAAGCATGGGTTAAACTATGTGGAGGACCGAACTAGTACCTGTTGA  
AAAAGGTTTGGATGAGTTGTGAATAGGGTGAAGGCCAATCAAACCTGGAGATATCTTGTCTCTCCGA  
AATAACTTTAGGGTTAGCCTCGGATAATAAGCTTTTGGGGTAGAGCACTGAATTC TAGCGGGGGCCTAC  
CGGCTTACCAACGGAAATCAAACCTCGAATACCAGAAGC GAGTCCGGGAGATAGACAGCGGGGGCTAAGC  
TTCGTTGTGCGAGAGGGGAACAGCCAGACCAGCCGATTAAGGTCCCTAATTTTATGCTAAGTGGGTAAAGGA  
AGTGATGATTCGAAGACAGTTG GAATGTTGGCTTAGAGGCGCAATCATTTAAA GAGTGCGTAACAGCTC  
ACCAATCGA GAATCATGCGCCGATAATAAACGGGACTAAGCATAAAACCGACATCGCGGGTGTGTCGAT  
AAGACACGCGGTAGGAGAGCGTAGTATTCAGCAGAGAAGGTGTACCAGGAGGAGGGCTGGAGC GGATACT  
AGTGAAGATCCATGGCATAAGTAACGATAAAGG GAGTGAAAATCTCCCTCGCCGTAAGCCCAAGGTTTCC  
AGGGTCAAGCTCGTCTCCCTGGGTTAGTCGGCCCCTAAGTTGAGGCGTAACTGCGTAGACGATGGAGCA

GCAGGTTAAATATTCCTGCACCACCTAAAACCTATAGCGAAGGAATGACGGAGTAAAGTTAAGCACGCGGAC  
GATTGGAAAGATCCGTAGAGCGATGAGAACGGT TAGTAGGCAAATCCGCTAACATAAGATCAGGTCGCGA  
TCAAGGGGAATCTTCGGAGGAACCGATGGTGTGGAGCGAGGCTTCAAGAAATAATTTCTAGCTGTTGAT  
GGTGACCGTACCAAAACCGACACAGGTGGGCGAGATGAATATTC TAAGGCGCGGAGATAACTTTCGTTA  
AGGAATCCGGCAAATATCCCGCTAACTTCGGAAT AAGGGGAGCCTTTTAGGGT GACTATGGAACGATAG  
GAGCCCCGGGGGGCCGAGAGAAAATGGCCAGGCGACTGTTTAGCAAAAACACAGCACTATGCAAACCTC  
TAAGGGGAAGTATATGGTGTGACGCCGCCCAATGCCAAAAGGTAAAGGGATATGTCAGCTGTAAAGCG  
AAGCATTGAACCTAAGCCCTGGTGAATGGCCCGCTAACTATAACGGTGCTAAGGTAGCGAAATTCCTTG  
TCGGGT AAGTTCCGACCTGCACGAATGGTGTAAACGATCTGGGCACTGTCTCAACGAAAGACTCGGTGAAA  
TTGTAGTAGCAGTGAAGATGCTGTTTACCCGCGAAAGGACGAAAAGACCCCGTGAACCTTTACTGTACTT  
TGGTATTGGTTTTTGGTTTTGTTATGTGTAGGATAGCCAGGAGACTAAGAACACTCTTCTTCAGGAAGAGTG  
GGAGTCAACGTTGAAATACTGGTCTTAACAAGCTGGGAATCTAACATTATCCCATGAATCTGGAAGATGG  
ACATTGCCAGACGGGCAGTTTTACTGGGGCGGTATCCCTCTAAAAAGTAACGGAGGAGCCCAAAGCTTAT  
TTCATCGTGGTTGGCAATCACGAGTAGAGCGTAAAGGTATAAGATAGGTTGACTGCAAGACCAACAAGTC  
GAGCAGAGACGAAAAGTCGGGCTTAGTGATCCGGCGGTGGAAGTGGAATCGCCGTCGCTTAACGGATAAA  
AGGTACTCCGGGGAT AACAGGCTGATCGCCACCAAAGATTTCATATCGACGTGGCGGTTTTGGCACCCTCGAT  
GTCGGCTCATCGCATCC TGGGGCTGGAGAAGGTCCCAAGGGT TTGGCTGTTCCGCAATTAAGCGGTACG  
CGAGCTGGGT TCAAAACGTCGTGAGACAGTTTTGGTCTCTATCC TCGTGGGCGCAAGGATACTTGAGAGGA  
GCTGTTCCTAGTACGAGAGGACCGGAATGGACGAACCAATGGTGTATCGGTTGTTTTGCCAAGAGCATAG  
CCGAGTAGCTACGTTCCGAAAGGATAAGCATTGAAAGCATCTAAATGCCAAGCCTCCCTCAAGATAAGGT  
ATCCCAATGAGACTCCATGTAGACTACGTGGTTGATAGGTTGGAGTGTAAGCACAGTAATGTGTTTCAGC  
TAACCAATACTAATAAGTCCAAAGACTTGGTCTTTTTATGATTGGAAGAGCCGAAAGGCAAAGACAATAA  
GAAAAAGAGTAGAGAGTGCAAGTGCGTAGAAGACAAGCTTTTTAAGCGTCTATTAGTATACGTGAGAAACG  
ATACCAGGAT TAGCTTGGTGATAATAGAGAGAGGAAACACCTGACACCATTCGAACTCAGAAGTTAAG  
CCTCTGATCGCTGATGGTACTATACACGAGAGTATGGGAGAGTAGGTCGTCGCCAAGCATTTTATTATAT  
AAGATCTTAGTCATAGACTAAAAAGGAGAAGGGGTAGCCGCTAACGCAGCTACCCCTTTTCTTTTCTC  
TAAAATACCTTCTCTCTTCTTCTTCTGCTGTAATCC TAGTCAAATTATCTCTAATTC TCTACTATCTTCTC  
CTTATCC TTTAGAGCATTTTTCAGTTTTATCAAATATTTCTCTTTTCTACCC TTTTAAGACTTTAGAATAC  
CATGCTCCTTAGAATGGACAGAGGGATCC TGGGATCATAACGGAATTTCAAACAGAGGCCTGCTGGAAA  
GATCAAAGCATGTATGTAGGCTGCAGATGACTATACATGCAAGAGAATCGAGAAAGTTTGTCAATTAACA  
AGAAGTTTAGCTCTTTTTGAAAGCCTTGCCACAGCTCTGTATGCTGATAGCAAGGGCTTATTAATTAACGC  
ATGAGAAAGAAATAGAAGCTATGAAGAAGCTGTTGTAGAGGCTTCTTCTGGAGT GATGGAAGAAAAGTTA  
GCACCC TTTGAGCAGGTTAACTTCCGAAATCATCTAAAACAATAGAAGAGCGCTCAACACCATAATTATC  
TAACACGGTTAAGATGCTACTATTATGCAGAGCAGGACCGCAAACGTAATATAGATAATCTTCTGGATTG  
GGGAGATGACTCAGTTGTCCAAGTTCGAAAGCTTTAAACAAGAAATGGTTTTTATAGGATCATTC TTTAT  
CCATCC TTTGGTCTAAATCTTCCGTAAAGGCTGAGAGAGAACCAAGTGATAGTGGAAGTTGGGGAATTC  
TTTTCTTAACCTCTCATACTCTTCTTGGTAGATATTTCTTTAAGAGAACGTGCTCCATAACCACAAAGTC  
AGTCTCTGTCAGAATGTTTTATTC AACAGTAAATCAA GAATATGGCTTCTTCCAAAAGAAGATCCAGCAC  
CTCCTATTAGGAAGATAACAGGACGGTTGTTCTCTTTCATGAAAGACTCCCCATAAGGCCCGGATACCAT  
TACCTTATCACC GGGT TCCAGAGA GAATATATACGAAGAGCAGACTCCCAAGGGATGGTCGGGTCCGGA  
GCTTGATCCACAAAAGAAGGGGT CGCGATCCGGACATTGAATTTGATCAAAGGAAGTTCTGCTGGATAAG  
AAGCTAGGGAATACGCTTTATTCGCAGAGTCCGGTATCTAAAGATAGATTATCAATAACTTGGTCAAGTAG  
ATGGAAAGTCTCCAATCACTATAGTATTGGGGATCCATAGTCTGCTTCCAGTCCGAAGTATTGGTTTTTA  
TAAGGAGGAACGGTAATTTGTAGATAGCCTCCAGGTTTTAAAAGGAATAGGGCGCGAAAGGATCTACAGAAA  
GAACAAGTTCTTTGATAAAGGTAGCAACATTC TCGTTTTGATACAACAGTACCC TCCCAAGAAGAAGCATT  
GAAATAACGGTCTTCTACTTCTAAGCAGAGATCGTGTGTACTTTTCGTTTGGCAGGAAAGTCTCCATCCCT  
TGTTCTAATTGCTGCTTAGAAAAGGTAGAACGATCTGTTTCTAATGGTTCATCAGCATTC TTTGTAATGC  
GGACTTTGCATTGCTTACAAGCAGCTTTCCCTCCACAAGGAGAAGGGATAGCGATTCCTGAATCTAATAA  
GGAAGATAGCAATGTTTTCCCGCTGTCTACAGTCTTAGTGAGGGAATCATCATATTGATTTTTAGCTTA  
CAAGGATGCACTTTAATAAGGAATTTCTTGGAAAGCAGGATAACGGCGACAAGAAT AAGGTCTAAAGAAC  
AAAATGCTGCAGAAGCGACAAAGATAAGTACAGGCTGAAAGCCAAGTCATAATTATAAAAATCCCTGG  
AATTTCAACGAGACTGTAGCGTCAAGTTATAGGTTACTCTATAAAAAATCAACGAGTTTTTTAAAGTTT  
TATTACAAGGAAGCAAAGCCCAAGGACCTGGGCTTTGCTGAAAGGAGCTCGTTTTTATTTCTCAGCTTTA

AGAAATTTCTGAAATAGCAGTTTTAA**GAAT**TTCAATTTTCCCCGAGGCAATGTTGA**GAAT**GACTGTGTGTT  
CTC**GGAT**TTCCGCAATGGTGCCAACG**ATTC**CCATAGCAGTTACTTTATCTCCAACAGCTAA**ACTC**GCTTTT  
TCTTTTTTCCATAGCTTGACGACGTTTTTGTCTGGACGCCACAAGATAAAAATAGAAAAGACGATAGCA  
**ATTC**CTAACATGACTGCAGGTTGTCCAAACGTTGCGCGTTGAGGA**GAATCC**GTATCAGCAAATAGAGCTG  
GGCAAC**ATCC**TAAAAAGAACA**GGAT**ACTAAAAACAGACGC**GAGT**ACATCGAGGTGCCTTTTATTAG**GGT**  
TAAAA**GGAT**AGGTTAACACAGGAAGATAGGG**GGAT**CA**ATCC**TTTTCCAGAAGGAACAGCATTAG**GAATA**  
AGGCTTCTTGTTTTAAAGAAAGCCTTCTAAGAGCACAATATTTTCCAAATGATTAGTATGCGGAAACTG  
ATCAATAGGCTGCATGTGCCGTAGCTGAT**ATCC**TTGCTCTACAAGAACAGAGC**ATTC**TT**GGAT**TTGTGTA  
AG**GGAT**TGCAGGAGACATACAAATTTTTTTTAGGAGCCATGCGTAAAAGGTATTTTAAAGGCTTTATTTT  
GCATGCCGCAACGAGGA**GGAT**CGATGACTACAATATCTGGGGAAGGAAGTTTT**ATTC**CGTTTGCAAAA  
TTGTTTTGCATCTTCCAAAAACTTCCAT**ATCC**ACG**GAAT**TAAGCT**GAAT**ATTTTCTTGTGCTGAAGCA  
ACAGC**ATCC**GGGACTAGTTCG**ACTC**CAATAATTTTTTTTACGTAAGGAGCCAGTAAAATGCCGATAGTCC  
CAGCTCCGCAATACAGATCTAAGA**GAGT**CTCTTCTCCGCA**GGAT**CAAT**GAATTC**TTTGATAGTTT**GAAT**  
GATTTTTTCTGCTTGGAGGCTTTGTGGCTGGAAAAAGCTTCTTGGAC**GGAT**ATGGAAGAGACTAGAACGG  
CCATCTATCGATAATTGTTGTTTGGAGAAAGGAGCTCCGTATAGAT**GAGT**TGTCCGAAAGGTTGTGGAG  
**AGT**TCCGTGCGGA**GAGT**TTTTCTTCCAGAAAATCGAAGTAATCGGTAGTCCA**GAAT**CTAATAAAGATTG  
TTGCC**ATTC**TT**GGAT**TAT**ATTC**AGAGGTACAGC**GAATTC**TTCTCTTCTGATGTAGTCA**GAAT**AATCATA  
AAATCATTAGAGATATTGCC**TACC**GGACTGTAATAGTGCACAAGGAGCCTTTATTTAATGGT**GGAT**AGT  
ACGCAGACAGGTCA**GGAT**GGGCAGTCCACCACGAGC**GAGT**GATATTA**GGATATCC**ATGGCACGCTCATC  
AATCATTAAC**ATTC**GGTAATT**GGATTC**CTTTTTTAGGTTTTGATGGAGAAAATAAAACCTAAAGTTTTT  
TCTCCATCAACCGTTTGGTAAAAAGAAA**ATTC**CATTTTATTTCTTCCGCAAGAGAGGAGAACAAG**GAA**  
**T**TACAGGG**GAAT**ATTTTGG**GGAT****GGAT**AAGAGGTGCAATAAATATGAGCGCAAGCTCTTTTGT  
TAAAGA**GGAT**GCAT**ATTC**CATTTGAGGAGATGAACAGCCTCCACAGACGCCAAAATGTTTACAGTTACGA  
TAACAGGAGAGCAACTT**GAATCC**TAAAGAAAGTGAAAGTTTTTCTTCCAAAGGAGGTGTGAGGTTGTAC  
TTTTATTTGCAAGGACTTGCCTTTGCGAGAACGGAAA**GGAT**AACAAAAAAGAGAAG**GGAT**CAATGAGA  
AGGGGAAAGAGGGCCCTGTTGATAAAAGTGCCCTCTATAAAAAAGAGAAAGCGCTAAAATATTATTTTTT  
TGTTGAGC**GAGT**TTTTTTCGCTGTTTTAACTTTTTGTTTTAGGGGCGGCTTTTTTTGTTGGTTGACCTTT  
GCTTTAGTAGCACAAGTTCTTTTTGTACAAGCTTTTTTAGCTACTGTTTTTGTAGCGCGAACAGGCTTCT  
TAGCAGCAGCTTTAGCTTTTTTACGAGCGGCTTTGCTTTTTTTTCATTAAGCCCATTTTTTCTGCTTTAAT  
GG**ACTC**TTTACGATATACCTTCGCGTCTTTTTCTAATTTGATAG**ATTC**TGTACGA**ACTC**TTTGTGCTGCG  
GCTTTATTTCTTTTTCTGCTTTAAGCAAATTTTGT**GGAT**ACTTTCCAACAAGTCAGTCATTTTTTTTTG  
CCGTATCTTTTAGCGCCATGAAAAAAT**ATCC**TCTAGTTGTTGTTTTAACTATTTTTTTCAGTTTTAATT  
TTAATTAGTTTGTGTTCAA**ATTC**ATGCAACCATTTTCTA**GAAT**CTAGGTAA**GGATCC**TAAAGCAGCT  
TTATTTGACATCTCCTTGTACCCTCTGTTTATCAATAGGTTATTTTTCTCTGTTAATAGAAAAATTTT  
TTATAAACTATGTGCTGCATA**GGGT**CT**GAATAGGGT**TTCTTTAATAGAAAGCGCTGAACCTGTTTAG  
AAAAGAAAGAAAGGAGCTTGTCTCTGTTAGAAG**ATTC**TTCCATAGATCTTTTCA**GAATGGAT**TATTAAG  
ATGCCCTCATGATGAGAAGTCTTTCAGTCTTCTTGAAGAG**GAAT**AAACAAGTGTTTTTTTCATAT**GAAT**  
ATTTATAG**ATTC**ATCTCTGGAAGCTGTTTCATGGTTCTGATAGGTTGGG**GGAT**ATGCTTCGGAGCTGACG  
TGCCACTTCTTTTTGGGCACCAATGCGCAGACGTTCCGAAGGCGATGCAAGAGGGCAAGCCGCTTTTGCC  
TATTTTTGATGCGTTT**ATTC**GTCTGATCGT**GAAT**GACAGCTCATCTTTATCTGAGAAAGATTGGGAAACA  
GCAACATGGTTAATTTGT**GAAT**ATATACGAGG**GAGT**TTAAAGCGGGGAGAACAA**GAGT**TATGCTCGGAGC  
TTGTAAAACCTCTGTTTTCTTTAGCTGTAATGCCTCCGCAGTCAAAGCTCGTATTAAGCAAGTGTGGCA  
GGT**ACTCAATCC**TCAAGGAGCTTCTTTAAAGGACTTAGTCCGTTACTGGAAAGTAGC**GGAT**GCTCCTCT  
TCACCGCAAGATCATCTCCTACTTCTTTATATAATATGACACTGCATAGCAGTTATGAGAACAAGAAAG  
CAGAG**ATCC**TTTTTGAAGAGAACAAAAAATTATCAGGACGCTTTACGTTTATGCGAG**GAGT**TGCAAGA  
AAATCTGACTTCAGGGCTTTGTTTACCTCTTTCAACGGTATATGAGGTGGAGCAAGCCTTCTTAAAGC**GA**  
**AT**CTCCTTAGCCATACGGTGGGAACAAGAGAAGGAGCTGCAAGGGAGCCCTCTATA**GAGT**TGCTATTGG  
CCTATTGTAGTGCGGAAGA**GAGT**TACGCAGAGGCTGTGGAGCAGTTAATCAAAAAATA**GAAT**TAGGAAG  
CTTAGACCGATCACAAGAAGTCGACGCAATTTTATTTGCACATGCGTTAAGTAAACTTCCATGGGAAGAG  
**ACTC**TTGGAGAACACGAAGTGGAGGTTCTCATATCAGGAGGACACTATCTCACATCGATTT**ATTC**TCAAC  
ATGCTTACTTTTTCGCTTCTCGAACAATATTTAAAAAATCTCAAATACAAGAAATATCTCGCTTATTAGA  
TTTTGGGAAAACCGTCTTTGTTGAG**ACCC**CATAAGAAAT**ATCCGAAT**ACCTCTTCTTTCTAGGCAAGTAC  
TGGTTTTACTTGCG**GGAT**TTCTCTCGTGCAGAAGAGGCTTTTTTCTTCTGTA**ATTC**GGTATGCAGATCGAC

TGGGAGTGTCTTTAGCGGAACTTATGAGTATTTAGGGTGTTTAGCTTGTTACAAAGGGCACTATGCTTC  
CGCTAAA**GAATTC**TTTCTTAAAGCTTACAAGGGGTGGGGGAGAGA**GGAT**GCCGGTATA**GGAT**TGTATCTA  
TTGGCAGTCTTAGAAAAAG**ATCC**TATTTTATGTCAGCAGGT**CAGAGA**ACAGGTGTCTTT**ATCC**TTTTCAC  
ATCAG**GAAT**TTTTTAAAAT**GGATGGAT**AGAAATTTCTTACCTGAGCCAGGGAAAGAAGGCTCTTCTTTTTT  
TAAGGTATTGGGAAGCTCGCGTTCTTTATCTGAAGAA**GAGT**TTTAT**GGAT**TACTGCTAAAGGAGATGATT  
AGTCGTCATCATAGAGAGAAGCTCTCTTGCTCTCCTATACAACGGCTAGTGTACGACCAGTT**GGAT**CGAG  
AGATACAACTTCGGTTGACAGAAAATTA**ATTC**AAACAGAAGATCTTCTGGTGAGACGCAAGCTCTCTTT  
ATGGAGAGCTCTATATGAA**GGAT**CGTTTGTATCTTGG**GGT**CTGCTCATCA**GAAT**CAGACTTTATTTGAG  
AAAAGTATTTTGCAGTGTTTTTCTGCTCTGTGCGCAGCAGG**ACC**TAGCGCAATACAGCAAATAGCAGAAG  
CTTTTTCTTCAGGAGCCTCTTTATGGCA**ATCC**CTTTGA**GGAT**GGTGTGGGCAGTTAGTCATACTAGTGA  
AA**ATCC**TATATCGAAGGCAT**ATTC**GTTAGGCATATCTGATCGGCCTTGGGGAGATCGACTGTATCTTTTA  
CAGT**ATTC**ATTAGAGCAATATCTTTCTGGAGATACA**GAAT**TATTA**GAGT**ATTTAACACA**ATTC**CC**GAAT**  
**TATTC**CC**GAATTC**GCCTTTGTTGCCTTTGGTTTATTATTTGCAGGCAAGAGGTGAGGGAG**ATCC****ATTC**G  
AAAGATCGCTTGGTTAACAAAAGCTTTAGAGACTTTTACGGAAA**ATTC**TTTGTAGCAAAGGAGATGAAA  
GCTTGGGCTCCTTTGTATTATTTAATGC**GAATGGAT**TTAGCAGAAACCTACCTATATTTAGG**GAAT**GTGT  
CTAAATCACAA**ACTC**TTTTCGAAGCG**ATCCA**AGAA**GAGTGGGAT**GCTCCGCACC**ATCC**TTATGTAAAGTT  
GATAG**ATCC**GCCGCAC**ATCC**GTGTGTCTTTGGAGATGCGTT**GGGT**TTCCGGGGCTTGCTCATGTGTATGAA  
GCTATACAAGCAACTGAACAAAGAAAATGCGTTATTAATCAGCCACATTGAAAAACGTTTCTTTCAAACGC  
GACCAAGACAG**GAAT**TATATTGGGAAGATGTTAAC**ATTC**AC**GAGT**TCTCTATGCAGAGAACTATTAGCAGA  
TGCCTCATGGTAGTAAAGAAGCTATAGCTTTATAAGCAGACGCTGTAGCGCGGTTGAGACCTGGACCTGC  
AAA**ATTC**TGCCCTACAATTTTTATATTTGTGAGGAAGTTTAGATAGAAGGCGTTGGCG**GGAT****GGAT**AAAT  
**CCA**ACATGGTGTGGGGAAAGTCCCTCTCGAGGAGA**GAAT**AGTGAGAAAGCTTGGGGAG**GAGT**GTAATTT  
GCAGT**ACTC**AGAAAATAGCTGCTAGTGAGAAAGCATAACGCTTCTTCTTGGTGCCATCGACCTTCTAAAAG  
AAGAGAGACTATTGTATTAGGCCGCTC**GGGT**TGAGGGAACACTTCCGTATTA AACACG**ATCC**CTAATAAG  
GGAGGCGTATCAGCGAAAAGCATGCCAT**ATCC**ATGAG**GGAT**AGGGAG**GGAT**GCATGCC**ATCC**TAAAGATA  
CACAAAGAGAG**ATCC**CAAGATGAAGTCGTTTGCTTGATAAGCTTGGTTTCAG**GGAT**CTCTTCTAGACAGGA  
AGGGAGATCGTGCACGG**ACC**AGCATAAATGAGCATATCTCCCGTTATTTCTCCTTGAGGAGATGAAAGA  
GAAATTTTCCCGTTCGCCAACTGAC**GGAT**TTTTGCTGAC**GGGT**GCAGAAAATACCAGGTAGCAGGCAATT  
TATCATGCAAAGCCT**GGGT**TAGC**ATTC**CC**ATCC**CAGACCGCAAGGTAGCTAAATAAGGGCCTGTGCGTTT  
CTCTTTAGGAAAATCTTTGAGATAACTACGTAACAACG**ATCC**TGTTTGAGCTTCTCTTCGCGTTA**ATTC**T  
**GGGT**AAGCCATCTGTGCGACAAATATGACTATGCTCTGCAC**GAAT**AGCAATGCTAAT**GGGAT**TTAAAA  
GATTTCTTCTAAGCTTGAAGAAGCTGTGTCTTTTAAAGAAGGCTTCCACGGAGCTGTCTTGTGTTAAGG  
ACGCGCAAAGAA**ATCC**TTAGCAAAGAGAGAGGGAGATTTTGTGTTGAAAATAGTCCAAGGCGAGACTTTT  
C**GGGT**TTTTATTATTATAGT**GGAT**AAAGCGTTTTTAGCCTCTGGAGAGCTATATAATAGCTCGTCTGCTA  
GGCCTAAAGACT**GAAT**GAGGTGAA**GGGT**GTGTTGCCCATCATGAGCTAAAACAAAACCTTTAGGGCCCAT  
ATTGAGGGAAA**ACC**TTGTTGTTTCTCTGTGACAATTAGCCCTCCAGATCGAG**ACTC**TTTTTCTA**GAATA**  
GACAACGTCACATGAGG**GAAT**CGTTTGTGTAGCCACCACGCGCAGAAAGGCCGCAATACCTGAGCCAA  
CAATGAGAGCATGTTTCATATAGACTTCGAAAAAAGAGTTTTTCTACGATGTCTTCAAAAAATAATGG  
TCAAAGGCTGTGGCAATG**ACC**GTACAAAAGCTCTCCAAGAG**GAGT**TACTTGTAAGAAGAG**GAGT**CTT  
GCC**GAAT**TA**ATCC**TGC**ACTC**TCC**ATCC**CGCACAGCCGATCATAGCTATCTGCAAAGTATCGATCAAAGCG  
TTCATGAAACCGTTGTTCGAACTCAGTTTAGACAATGAAAAAGAACACATTA**GGGT**AT**GAAT**C**ACCC**AT  
TTGC**GGAT**TTTTAT**ATCC**TGAGAAA**GAAT**CTTGCCTTTCACAGTTGCTAGTTTGTAGCCT**GAAT**AGTCT  
CAG**GAAT**AT**TC**ACGAAGAT**CC**TTAACATTTTGTAAATAG**ATCC**CC**GAAT**GAAACTGGTTGCCGATATACC  
AAAACCTAGAAGATCTTCTTCAGGAGGAAGA**GAGT****ACC**CTTGAAATTAC**GAAT**CAACGTTTTTGTCTTA  
AGGGCGATAGTTAGAG**GGAT****CATCC**GGAAGAGAAAAATGATCTAGACCAATAGCCTGGTAGCCTTCT**GGA**  
**TC****AGGGT**ATGCCGAGATTGG**GAAT**AAATCGC**GAAT**TTCTCTTCCATGGAAGGGAGATCTTTAGTGCGCAA  
AGCCTTTTGATGCGGCTTAGCCCAAGGTACATGAGCGAAGGAGAAAAGGGCTAGGCGGTCTGGCCGCATA  
TCTAAGATATGTTCAATGGTTTGTFTA AAACCTAGACTGTGTTTGTTTAGGGAGACCATAAATGAGGTCAA  
TATTAATACCTGT**GAAT**TTTAAAGTCTCG**GAAT**AGTTGATAAGCTAAGAGCG**ATTC**TTTCGTAAGATTGGCG  
TCTACGAACAGCTTCTTGAACTTCCATT**GGGT****ATCC****GAAT****ACC**AG**ACTC**ACACGATTA AAAACCTAGG  
TTATGAAG**GAAT**AGAGGTTTATCGGC**ATCC**TCTCTGAGACTTCGAG**GGAT**CGAA**ACTC**TATGGCAAGTTCTT  
CGATATT**GGAT**AAATCAAAAAACGAT**GGAT**AT**GAGT**GAACAAACGTTCAAATTGAGCACGCGATAAACG  
ACTAG**GAGT**CCCGCCACCAAAGT**GAATTC**TAGAGACTGGTTTCTTCCCTCTAATAACGAGAAAAGCTAGG

CGCATTTCCTTGGATTAACGTCTCTATGTAGTGATCTACGATTTCTGCTTTTCTATTTAAAACAACAGTAC  
ATCCGCAATATAGACACATAGATTGGCAGAATGGATGTGGAAGTATAAAGAAAGAGGATCTTGCTCCTG  
AGCAAGCCTCTCCAAGCCGTATAGCCATAATCTGAGGAGGATTCAGTTCGACGATGGTGGGTAGCTC  
GTATAGCGAGGAGCTGGTTGATGCAGCCCTTTTAGGAAGTTGAAATGATGTTAAACATGATAACAACAGC  
CTGTACATTTTCTATTTGGCGTTTGGAGTAAGATAACCATGCCCTAAATTGAAAATATAATGCGATTGCTGT  
TTTAAAGGGAGCAAGATAAGCTTCAAGGTGAGCAATCAGTGCCTTGGGGAAAGTAGTAAAAGAGCAGGAT  
CGAAATTTCTTTGGATAGATCCGGACTATGTATCTGACGGTAAACCTCTGGGAGCTCTACGTGATAATC  
GGGATGTAAGGTATCTGCTCCAATCGCATATAGAGACAAAAATTC TTGGTAAAAGCATCGGCAGAACAGA  
CTAATAGGAGGATTCCTGTCTGCTTGATTTGACGGATAGCTTGGTATTGGGAGCAACTACGTATTTTG  
CAAAGAGGTGAGGAGGCAGTCGTAACTCGAAGATTC AAACAATTGAATCGCTGCAGCTCCAGCTTGCAC  
CTGCATCTGGAGATAAGTAGCGGTCCCTAGAGTGATTTATCCAAATAAGCTTTAAATCTGTGCGGATAT  
TGATAGAGGAATGCAATTGTTTTAGGGTAGTCTCTAGATGCTCCCCCTCTATTAGATAACTGGCGAGAG  
TAAAAGGAGAAGCGGCAAAGGCAATCAAAGGGACCGTGAGACGTTTCGTTAGTTGCTGGATAGCTTCCAG  
TAGAAATGAGAATGTTTCTTGAAGGATCTTTTGTGAAAATAAGAGGTTTCATGAGGGGAATAGCTAACCTCT  
GGCCAGGAGCAAATCGATAATCGACAGAAAACCC TTCTAGAATAGAGA GAATATCAGCAAAGACAATAG  
CGGCATCTACTCCTAATAAAGAAGGCCCTAATAGCGTCTGCTTCTACAATAGACTCAGTATCCAAAAA  
ATCTTTCAAAGAACGGTTTTCTTTTCAGCTCTTGATATTGAGGTATATATCGCCCCACTTGGCGGAGGAAC  
CATATTGGCGGACGTTGTTGATCTCGAGGGGAGATGGTTTTATAAAAACCCGGTCATAGGCATCCCTACC  
TCTATTATTTGGGAAAGCCTTTTCTACAGACTCTGGACTTCTTTTACTAAAAGTTCCGGTGTGCGGTGA  
TAAA GAATACGGTAACGTTTTTTT GAATTTGTTTTGCTTTTATCATGATACTGCTGGATATATAATGCATTC  
CCTGTTCCCTTTGATACTGAAAGGTGATATTCCTGCGCGATTAACC GAATCCGTGCTAGAGCAAATAACC  
AGGAAATAGCTTCTGGAGAAGGTCCAAACCTATCCCGCAGCTCTTCTTCTATAGCCTCTAGCTCCTCTTC  
AGATTCGGCGTTTCCAATTTTTTTGATAGA ACTCGATGCGCATAGAAGCAAGATCTATATAGTCTTCAGGG  
ATGCGCGCATGATAAGGAAACTCAATTTTTATATCATCGTGGAAGAGCATGGGT TTTTGTATGCTTCA  
GGGCAGCCACAGCTTTTTTTCAGTAATTTGCAATATAGGTTAAACCC AACAGCACTAATATGCCCGGATG  
GTCGGTACCTAAAATATTTCCAGCTCCGC GGATTTCCAATCATGAAGAGCTATTTTCATCCCGCCACCG  
TACTCCTGTTTTATTC AATGCTTCTAGGCGTTTAGAAGTAGGTCCGGATAAGCGATCTAAATGAGGGACAA  
GAAAATAACAATAAGCTTTCTTATTCATCGTCCAACACGGCCTTTTCAATTTGATACAAATCAGCCATACC  
GAATTTATCTGCGTGGTCTATCAAGATCGTATTTGCATTAGGAATGTCGATAACCATTTTCAATTAAGCC  
GTTGCGACAAGCACATTGGTTTTGTTGAGTTTTTAAATTTATAAAAATATACTTGTAGTTTCATCGGCATGCA  
TCTGTCCATGAGCTACGCCAATACGCGCTTCCGGAATCAATGTTTCGAATGGTTTCTCCTAAACGGAAAAT  
ACTTTCGATGCGATTGTTGAATAACGTAAACCTGCCCTCCAGTAAAAGCTCATGGCGTATTGCTGCAGAT  
AGGGTTTTCTTCA GAATGCTCCATGACAAATGTACTGACGGGAAGTCGATCTAAAGGAGGCATTGTAATGA  
GAGAAAGTCTCGAGCTCCAGATAAAGAGAGATAACA GAGTTCTTGGAATTGGAGTTGCAGAAACAGTAAG  
ACAATCGATTGTGGGGAAGCGTTCTTTTAGAGAATCTTTGGCCTTCACTCAAAGCGTTGTTCTTTCATCA  
ATAATAAGTAGGCCTGGATTATGAAATTCATGGCTTTGTTAATGACTTTTATGAGTGCCAATGAGAATGT  
CAATACGTCTTTGGGCTATATCCCTCTAATGTTTTTTTTCATCGTTTTCCCTTGAGAAAAGCGGGACAATAG  
TCCAATGTGATGGGCAGCCAGCCATCCGTTGGGAAAAGTTTCAAATGCTGGTTTCGTAAGATCGTA  
GTAGGGACCATAACGATTACTTGTGTTGTGCCATCACACACAGCTTTTACGGCTGCCCGCATAATGATTT  
CTGTTTTCCCGAACCC TGCATCTCCACAAATCAGCCGATCCATTAATTTATCAGACATCATATCTGCATA  
AATCTGATCGATAGCTTTAAGCTGATCTGGCGTTTCTTCATACGGGAAACTTTCCGGCAAATTTGATTACC  
TCTTCTCCGTGCGGGGATAGATAAAA GAATTCGCTGTAGAACGCTGAGCTTCCATTTGAATCAGCTTTT  
CTGCATACAAAATCACAGAATTTTCTGAGAGCTCCCGAGATCGTCGCCACTTTGCTCCATTC AAGTGATG  
CAAATCAGGAGCTTTTCTGAAGCACCAACATAGCGTGAGATTAGATAAGCTTGGTCTGAAGGGACATAG  
AGGCGAGCTTTGTCTGCATACTCTAAAAGTAGATAATCTGTTTCAATATTGAGATGATTAGGCTTTTTCT  
CTATACCAATGAATTTTCCAATTCATTGTGTAATGGACTACAGTCTCTCCTGGGACTGGAATATACAC  
TTCTTCCGTTGTAGTAGAAAAATAGTTCCGTTGTTTTTGTCTACGGAGGACTTTGCTCGCTGCAAAATTC  
GAAAGGGAAACTGCAGCAAATCCAGCTTCTACTAACGCAAAACTGGAGGAGAGAGTTGTAGGATGGTCGT  
AAATTTGAGTGTTTGGATACAGGCTGCTGCGAGATCATGAGCTTCTTTTAAAGGATTTTGTATTGGAACA  
ATACAAAGCTAAAGAGAGCGTACGCCAGCACAAAAATCCTGGAAGGTCTTTAAAATGCAAGTAAAGGG  
TTTTGCTCGCCACTAGTTTCTATTAGTGCCGGAGGATAGATAAAAAGGTAAAGAAACTCTTTGTACAGAGA  
TCTTCTTATGAAAAGCCTCTATAGAAAATCCTGTATCC TTATGCGAAATGAGATTGGGGAACGTTTTTTTC  
TTCAA AAAATAGAGGAGTAAATTC TTTGAGAATCCGCTGACATAGATCCTGAATGGGCATAAAAACGTTTC

GGAAGAGATGCTAAGATGCCTGCAATATCCGAAAAATTATCTTCAAGAGACGAGAGCCCATCAAAGATAC  
AAAGCGGGAACGCTTTAAATAATCCAAAAGTGAAT AAGATAATTTGTCTGTAGGAATGATTGCCGTCGC  
AGGAGAAATGGTAATTTGAGACAGCTTTCCTGTAGAGAGTTGATCCGAAGGGTGTAAAGAGCGAATAGAG  
GAAACGCGATCCCCCAGAATTC AATGCGAAAAGGTTCTGGAGAAGATAGGGGGAAAATATCAACAATCC  
CTCCTCGGAATGCAAAGTCTCCTTTTCCCTAGCTAGAGCTTCATGTCGATAACCTAAACTTTTACAAG  
ATCGAGTAGGGTATCGGGATCCAGTTCCTCTCTACTCGAAGTTCGAGATGATCTCGGATCATAGATTC  
GGAGAAGGAGTTCTTCTAATAAAGCCTTCAGTGTGTGACACAGATAACTGGAGCACTCTGTTTTGCA  
GAGAATACAGAATATGGTCTCTTTTCCCACCGCATCAACATTCACCAGCTGGGGGATAAATCTATTTT  
TGAAGCAGGGAACTCAAGAGGCGATTCGCAATAAGAGTTCGCAATCTTCGAATAAATCATCAAGTTTT  
GCCGGTGTGTAATAACGACGATAGAGCGTTAAGTCTTTGAATAGTTTTGCTATGACAAAAGACCTTG  
CTCCGAGTGGAGATTTTCCACTAAGGACGGGAGCTTCGTGTCTTTAATAAAGGAAAAGTAAAGAAATC  
TATGCTAGTTGGGTGAAATCCATTGTCTTAAAGTTTTGTTAAGAACTCTATTTGAGGTAGCTCCGCGG  
AACTACCTTGTGCCGAAATCGCTTTCCCGCCACAACGCCACCATATGGAGCAAGAAGCTCTGCAAGTAA  
GGTGTGTGCCTGAACGCCTCGTTTTGTTAAATCATCGGAGACTTAGACAAGACAATGTAGCGACCATTC  
TTTTCTGTGATCCATAAAGAAATGAAATGGTAGGGATTTCTTATGTATAGCATTTGCGTAGTGTTGAA  
TTCTTTTGTCCTTCTCCTCAGTTAAATAGTAAACTAAGTACGAAGTATCACAGATTTTCTCACAGGAAGT  
TAACAAGGGTTTTTACTTGTGTGTAACAAGCTGATTTTCCAAATCAGCAACTTGTGGCTAAATCCTTTT  
TTTTCTTCCATTACACTGCGGATTTTGACAAGGATTTGATCTTTAGGAGATTGGATAACGGTAGCTATCT  
CATTTAAATCCACATCTTGTCCACGAGCAATATTCGCGCGTCTTCTCCTGTTGTGCTTCTATACGACG  
GATTCCTGTTGCAACAGCATGTTCTTTGGTAATTCGAAATAGCCAATATCTCCAGTTGCCTGAGCATGC  
GTTCCCTCCACATAGTTCGTGGGAAAATCCTGCCAAAACAACACGAACAATATCTCCGTATTTATCCCGC  
AAAAGTGTGATTTCTGAAGAGCTCATTACGTCAGAATACAAAACCTTCTCGAATCGTTACC GGATCATT  
TTCTCTAATTTTCTCATTCACGAGAGTTCCTATTGCTAGAAGATCCCTCTGGTGATAGCGCTTTGTTATGA  
GTAAAGTCTAAACGAATTTTTTGAGAGTGCACATAAGAACCTGCCTGACGGATATGTTCTCCAAGAGTCA  
TTTCAAGAGCTTTGTGTAGAAGATGGCATCCGTGTGATTATTAGCGTTTTTTTTCCGAAGGTTTTGGTT  
TACCTGTGCGGTGACAGCCATTGTCGTTGTCAAACCTCCTTGAGAAAGTTTTCCCTAGATGAACGATGAGT  
CCTGCTTTAGGGGCAATAGTATGAGATACCAGGAAAGTTCCTGATTCACAGAAAATTTCTCCAGAGTCTC  
CTATTTGGCCACCTTTTTCCGCGTAAAACGGGGTGGTTCGTAATAAATTGCTCCTTCATCTCCTTCTTC  
CAGTGATGAAGCAATTTCTGTTGACTTAAATAATTCCTTCAATAAAGGTGTCGCAGGAAAGAGTATCGTAT  
CCGATAAACTCGGAAGTGTAGTTGGATCTAAATCTTGGAAACACAGAATCACTGTCATTCCTAGTTTTTT  
TCGTGTTTTTTTCGAGAGCGTTCTTTAGCTTCTACTTCAAGCTTCTCAAAGGTATCCATATCTATTGCGTA  
GTTATAATCCTTTGTAGTAGGGCAATTTTCATCGATAGGAAGCCGTAAGTATCTTTGAGTTTGAAGGCA  
TCTTCTCCAGAAATCTTAGCGGAAGAAGCTGAAGATTTCACTACTTGTGGAGTAGATTCACCTCTCT  
GCAACGTTTTGAAGAAATGCTCTTCTTGTGGTCAAGACTTCTGGATTTGTGTGACTGATGCAGAGAG  
TTCAGGATATGCTTCTCCATTACATCCACTAGTGAAGGAACCATCGGCCAGAAAAGGGCGATTGAAT  
CCTAAGCGTTTTCCGTAATTGACAGCTCGGCGGA GAATTTTTCTTAAAACATAGCCTCGTTCAAGTATTC  
CTGGTAACAGCCCATCAGCTATTGCGAAAGAAAGAGAAGGGATATGGTCCGCGATCACTCGGAAGGCGGC  
TCCTTTGCTTCTGTTGGAGAGTATGTTGTCCC GGATAAATTTCTATTTTGGAAATGAGATGCTTAAAG  
ACGTCTGCTTCGAATACGGTTTTTGTTCAGCTAATAGAGAACTAAACGTTCTAAGCCGGCACCTGTAT  
CAACACACTTCTTCTGCAAAGCTAAAA GAGTCCCGTCAGAAGTCTATTAAACTCATGAATACGAGGTT  
CCAATACTCTAAGAAGCGTTCTCCATCAACGTCTTCAAGAGGAGAAGCGGCTTTCCCAAATTTTTCTCCT  
CGATCGAATAAAGCTCGGAACA GAATCCGCAAGGTCGGTATCCGCCATACTCAGAAATTATCTTTGT  
CTGTAAACGAAAAATTCGTCTGTGCGAAGATATTTTTCCCAAAGAGCGAAAGCTTCATCATCCTTTTCT  
ATGCACGGTGGCATAAATAAATCAGGATCAAAATGAAAACAGAAAGCGAGACTTCCAAAGCAAAGGAA  
ATAGCGTCTTGTTTGAAGTAATCACCGAAGGAAAAATTCCTAACAATTTCAAAAAGGTAAGATGTCGGG  
AGGTGTGTCCAACATTTTCTAAATCATTATGTTTTCCCCGGCACGAATGCATTTTGGAGATGTCGTTGC  
CCTTGTGTAATCTGCTGCTCTTTCCCTAGGAAAAATTTTTGAACTGGTTCATTC CCGCATTCGTAAG  
AGTATGGAAGGATCATTATGCGGGAAAACAGGAGAAGATGCTACAGGTGTATGGTTCGGTTAGCATAGA  
ATTTTAGAAAATTGGATCGAAGAGTGTACTCAACATGGGGAGACCATTTTTTAACTCACAAACATAAA  
AAAGATTTGTCCAAGACC GAGTCCACTAGTTTAAAGGAACAAAGTTTGGTAGGGACTTTTTGAAGAGAA  
GAGGCCCTCGGCTTCAAGAAGGAATATACTAGTGGATCACTCATAATTAGAACAAGCCAAGATGTAAGCT  
TGTTCCGAGCGCTAAAAAAA GAATTTTCGACAAAAAATCGAAGAGAGGAAAGGGTAGGATGAGCAAAAA  
AAGAAAAAAGAGAGGAAAATTTGTTTTATAAAAA GGGTTGAGGATAGTGTGTGAGGGGATAAATGAG

AGGTTAAGAAAAAGGGTTTTTTGGGAGGTTGATAAAAAATAGGTGCATAAAAAATAGGGGGTAGCATAAG  
ATGTAGCTTTCTTTCGAACGAAGGTTGAAGGAAGGCCTCTTACGTGGATGAGAGGGCGCGACAAGTGG  
AGGCTGAGAGGCTGGAAGCTTTTCTTAACAATGCAAATGAGATAGAATGCAGGCCAGTATAGATGCTTGT  
GAGGATTTCTTAAGAGATTAAGGAACCCGTTAATAAATCAAAGTATATATTTTTCTGAGAATTTGATCTT  
GGTTCAGATTGAACGCTGGCGGCGTGGATGAGGCATGCAAGTCGAACGGAGCAATTTGTTTCGGCAATTGT  
TTAGTGGCGGAAAGGGTAGTAATGCATAGATAATTTGTCTTAACCTTGGGAATAACGGTTGGAAACGGCC  
GCTAATACCAGATGTGGCGATATTTGGGCATCCGAGTAACGTTAAAGAAGGGGATCTTAGGACCTTTCGG  
TTAAGGGAAGTCTATGTGATATCAGCTAGTTGGTGGGTAAGGCCTACCAAGGCTATGACGCTTAGGC  
GGATGAGAGATTGGCCGCCAACACTGGGACTGAGACACTGCCAGACTCTACGGGAGGCTGCAGTCGA  
GAATCTTTCGCAATGGACGGAAGTCTGACGAAGCGACGCCGCGTGTGTGATGAAGGCTCTAGGGTTGTAA  
AGCACTTTCGCTTGGGAATAAGAGAAGGCGGTTAATACCCGCTGGATTTGAGCGTACCAGGTAAAGAAGC  
ACCGGCTAACTCGTGCCAGCAGCTGCGGTAATACGGAAGGTTGCTAGCGTTAATCGGATTTATTGGGCGT  
AAAGGGCGTGTAGGCGGAAAGGTAAGTTAGTTGTCAAAGATCGGGGCTCAACCCGAGTCGGCATCTAAT  
ACTATTTTTCTAGAAGGTAGATGGAGAAAAGGAATTTACGTTAGCGGTGAAATGCGTAGATATGTGG  
AAGAACCAGTGGCGAAGGCGCTTTTCTAATTTATACCTGACGCTAAGGCGCGAAAGCAAGGGGAGCAA  
ACAAGGATAGATACCTGGTAGTCTTGGCGTAAACGATGCATACTTGATGTGGATGGTCTCAACCCCAT  
CCGTGTGCGAGCTAACGCGTTAAGTATGCCGCTGAGGAGTAACTCGCAAGGGTGAAGCTCAAAAAGAT  
TGACGGGGGCCCGCACAAGCAGTGGAGCATGTGGTTTAAATTCGATGCAACGCGAAGGACCTTACCTGGGT  
TTGACATGTATATGACCGCGCAGAAATGTCGTTTTCCGCAAGGACATATACACAGGTGCTGCATGGCTG  
TCGTCAGCTCGTGCCGTGAGGTGTTGGGTTAAGTCCCGCAACGAGCGCAACCTTATCGTTAGTTGCCAG  
CACTTAAGGGTGGGAAGCTAACGAGACTGCCTGGGTTAACCAGGAGGAAGGCGAGGATGACGTCAAGTCA  
GCATGGCCCTTATGCCAGGGCGACACAGTGTACAATGGCCAGTACAGAAGGTAGCAAGATCGTGAGA  
TGGAGCAAATCCTCAAAGCTGGCCCCAGTTGGGATTTGTAGTCTGCAACTCGACTACATGAAGTCGGAATT  
GCTAGTAATGGCGTGTAGCCATAACGCCGTGAATACGTTCCCGGCCCTGTACACACCGCCCGTACAT  
CATGGGAGTTGGTTTTACCTTAAGTCGTTGACTCAACCCGCAAGGAGAGAGGCGCCCAAGGTGAGGCTG  
ATGACTAGGATGAAGTCGTAACAAGGTAGCCCTACCAGGAGGTTGGGCTGGATCACCTCCTTTTAAAGGAT  
AAGGAAGAAGCCTGAGAAGGTTCTGACTAGGTTGGCAAGCATTTATATGTAAGAGCAAGCATTCATT  
TCATTTGTGTTGTTAAAGTAGCGTGGTGAGGACGAGACATATAGTTTGTGATCAAGTATGTTATTGTAA  
AGAAATAATCATGGTAACAAGTATATTTACGCATAATAATAGACGTTTAAAGAGTATTTGTCTTTTAGGT  
GAAGTCTTGCATGGATCTATAGAAATTACAGACCAAGTTAATAAGAGCTATTGGTGGATGCCTTGGCAT  
TGACAGGCGAAGAAGGACGCGAATACCTGCGAAAAGCTCCGGCGAGCTGGTGATAAGCAAAGACCCGGAG  
GTATCCGAATGGGGAAACCCGGTAGGTAATAGACTACCATTGCATGCTGAATACATAGGTATGCAAAGC  
GACACCTGCCGAACACTGAAACATCTTAGTAAGCAGAGGAAAAGAAATCGAAGAGATTCCTGTGTAGCGGC  
GAGCGAAAGGGGAATAGCCTAAACCGAGCTGATAAGGCTCGGGTTGTAGGATGAGGATAAGGATCAG  
ACTCTAGTTGAACACATCTGGAAAGATGGATGATACAGGGTGATAGTCCCGTAGACGAAAGGAGAGAA  
AGACCGACCTCAACACCTGAGTAGGACTAGACACGTGAAACCTAGTCTGAATCTGGGAGACCACTCC  
AAGGCTAAATACTAGTCAATGACCGATAGTGAACCAGTACTGTGAAGGAAAGGCGAAAAGAACCCTTGTT  
AAGGGAGTGAATAGAACCTGAAACCAGTAGCTTACAAGCGGTGCGAGACCAATGGCCCGTAAAGGGTCAA  
GGTTGACGGCGTGCTTTTGCATGATGAGCCAGGAGTAAAGCTAAACGGCGAGGTTAAGGGATATACAT  
TCGGAGCCGGAGCGAAAGCGAGTTTTAAAAGAGCGAAGAGTCGTTTGGTTTAGACACGAAACCAAGTGA  
GCTATTTATGACCAGGTTGAAGCATGGGTAACACTATGTGGAGGACCGAACTAGTACCTGTTGAAAAAGG  
TTTGGATGAGTTGTGAATAGGGGTGAAAGGCAATCAAACCTTGAGATATCTTGTCTCTCCGAAATAAC  
TTTAGGGTTAGCCTCGGATAATGAGCTTTTGGGGTAGAGCACTGAATTCCTAGCGGGGGCCTACCGGCTT  
ACCAACGGAAATCAAACCTCGAATACCAGAAGCGAGTCCGGGAGATAGACAGCGGGGGCTAAGCTTCGTT  
GTCGAGAGGGGAACAGCCAGACCGCGATTAAGGTCCTAATTTTATGCTAAGTGGTAAGGAAGTGAT  
GATTCGAAGACAGTTGGAATGTTGGCTTAGAGGCAGCAATCATTTAAAGAGTGCGTAACAGCTCACCAAT  
CGAGAATCATTGCGCCGATAATAAACGGGACTAAGCATAAAACCGACATCGCGGGTGTGTCGATAAGACA  
CGCGGTAGGAGAGCGTAGTATTCAGCAGAGAAGGTGTACCAGGAGGAGGGCTGGAGCGGATACTAGTGAA  
GATCCATGGCATAAGTAACGATAAAGGAGTGAAAATCTCCCTCGCCGTAAGCCCAAGGTTTCCAAGGTC  
AAGCTCGTCTTCCCTGGGTTAGTCCGGCCCCTAAGTTGAGGCGTAACGCGTAGACGATGGAGCAGCAGGT  
TAAATATTCCTGCACCACCTAAAACCTATAGCGAAGGAATGACGGAGTAAAGTAAAGCACGCGGACGATTGG  
AAGAGTCCGTAGAGCGATGAGAACGGTTAGTAGGCAAATCCGCTAACATAAGATCAGGTGCGGATCAAGG  
GGAATCTTCGGAGGAACCGATGGTGTGGAGCGAGGCTTTCAAGAAATAATTTCTAGCTGTTGATGGTGAC



CGTACCAAACCGACACAGGTGGGCGAGATGAATATTC TAAGGCGCGGAGATAACTTTTCGTTAAGGAAC  
TCGGCAAATTATCC CCGTAACTTCGGAATAAGGGGAGCCTTTTA GGGTGACTATGGAACGATAGGAGCCC  
CGGGGGCCGCAGAGAAATGGCCCAGGCGACTGTTAGCAAAAACACAGCACTATGCAAACCTCTAAGGG  
GAAGTATATGGTGTGACGCTGCCAATGCCAAAAGGTTAAAG GGATATGTCAGCTGTAAAGCGAAGCAT  
TGAACCTAAGCCCTGGTGAATGGCCGCCGTAACATAACGGTGCTAAGGTAGCGAAATTCCTTGTCGGGT  
AAGTTCGGACCTGCACGAATGGTGTAAACGATCTGGGCACTGTCTCAACGAAAGACTC GGTGAAATGTAG  
TAGCAGTGAAGATGCTGTTTACCC GCGAAAGGACGAAAAGACCC CGTGAACCTTTACTGTACTTTGGTAT  
TGGTTTTTGGTTTTGTTATGTGTA GGATAGCCAGGAGACTAAGAACA CTCTTCTTCAGGA GAGTGGGAGTC  
AACGTTGAAATACTGGTCTTAACAAGCTGGGAATCTAACATTATTC CATGAATCTGGAAGATGGACATTG  
CCAGACGGGCAGTTTTACTGGGGCGGTATCCCTCCTAAAAAGTAACGGAGGAGCCCAAAGCTTATTTTCATC  
GTGGTTGGCAATCAC GAGTAGAGCGTAAAGGTATAAGATAGGTTGACTGCAAGACCAACAAGTCGAGCAG  
AGACGAAAGTCGGGCTTAGTGAATCCGGCGGTGGAAGTGGAAATCGCCGTCGCTTAAC GGATAAAAGGTAC  
TCGGGGATAACAGGCTGATCGCCACCAAGAGTTCATATCGACGTGGCGGTTTTGGCACCTCGATGTCGGC  
TCATCGCATCC TGGGGCTGGAGAAGGTCCCAAGGGTTGGCTGTTCCGCAATTAAGCGGTACGCGAGCT  
GGGTTCAAAACGTCGTGAGACAGTTTTGGTCTCTATCC TTCGTGGGCGCAGGATACTTGAGAGGAGCTGTT  
CCTAGTACGAGAGGACCGGAATGGACGAACCAATGGTGTATCGGTTGTTTTGCCAAGAGCATAGCCGAGT  
AGCTACGTTCCGAAA GGATAAGCATTGAAAGCATCTAAATGCCAAGCCTCCCTCAAGATAAGGTATCCCA  
ATGAGACTCCATGTAGACTACGTGGTTGATAGGTTGGAGGTGTAAGCACAGTAATGTGTTACGTAACCA  
ATACTAATAAGTCCAAAGACTTGGTCTTTTTTATGATTGGAAGAGCCGAAAGGCAAAGACAATAAGAAAA  
GAGTAGAGAGT GCAAGTGCGTAGAAGACAAGCTTTTAAGCGTCTATTAGTATACGTGAGAAACGATACCA  
GGATTAGCTTGGTGATAATAGAGAGAGGGAAACACCTGACACC ATTC CGAACTCAGAAGTTAAGCCTCTG  
ATCGCTGATGGTACTATACACGA GAGTATGGGA GAGTAGGTCGTCGCCAAGCATTTTATTATATAAGATC  
TTAGTCATAGACTAAAAAGGAGAAGGGGTAGCCGCTAACGCAGCTACCC CTTTTCTTTTCTCTAAAAT  
ACCTTCTCTCTTCTTCTTGTGTAATCC TAGTCAAATTATCTCTAATTCCTACTATCTTCTTCTTATC  
CTGAAATAGAGTTAAGA ACTCTAGGGACTTAATTTATTTTATTC TCCTTATTATC GAATTTTCGTTCT  
ATATTGGGTTAAGCATTCGTATAGGTATCAACTTCTGCTAAAGGAAAAAACATGGCTGGCAATAGTGATT  
TAGATATAGACATCTTAGAAAAGATTGCAGGAACTATTAACAGTTGAGCATAGAAAGTATTCAGAAAGC  
ATCTTCAGGTCATCCAGGAATGCCTTTAGGATGCGCAGAGCTCGCTGCTTATTTATATGGTTACGTATTG  
CGATATAATTC TAAAGATTC CGATGGGTGAATAGGGATCGCTTGTCTCTCTGCTGGACATGGTTCTG  
CTCTTCTTTACTC GTGTTTGCATTTAGCAGGATTCGATGTAAACCTAGAGGATCTGCAACAATTTCTGTC  
GCTCCAATCTCGAACTCCGGGCATCCAGAATTTAGAGAACTGATGGTGTAGAAGCCACTACAGGACCT  
CTAGGACAAGGAGTAGGAAATGCTGTTGGAATGGCTCTTTCATTAAAAATGTTAGGAGCCAGATTTAATC  
AGCCTGC GAATTC TATCTTTGATGCAAAAGTGTATTGCTTAGCAGGAGATGGGTGCTTCATGGAAGGCGT  
GAGTCATGAAGCTTGAGTTTCGC GGGTTCCTTAGGCTTGGAT AATCTCGTTTTGATTTATGATTATAAT  
GAGATTATTTTAGACGGGACTCTTCACGATGTAAGTATTGAGGATACAAAACAGAGATTC TTAGCATATG  
GCTGGATGTGTTGAAACTGACGGACATGATTTTGAGAGCTTGCATCAGGTTTTCACACAGATCAAGAA  
AAGCCAATGCAAACCTACGTTGATTATTGCACATACTATTATTGGACACGGCTCCCTAAAGAAGGAACC  
AATAAAGCACATGGGTCTCCTTTAGGAGAGGATGGTGTGCTCAAACCTAAAAGTTTCTGGCATCTCCAG  
AAGAAAAGTTTTTCGTTCCCTTCGGCAGTGAAGATGTTCTTTGCTGCAAAACAACAGGAAGGTAAGAAATT  
ACAGGAA GAATGGCAAGAACGCTTCCGAGTCTGGTCTAAACAAGCTCCCAGCAACATCAA GAATATCTT  
CGATTGATTC AAGAGATCTCGATTC AAGA ACTC GAAGAAATTTT GAATCTTATTGATATGCCA GAGTCTA  
TAGCCGGGCGTGCAGCTTCAATAAAGTCAATTCAGGTATTAGCAGAGGATATTC CATCCCTCGTAGGGG  
ATCGGC GGATCTCTCTAGTTTCAGATGGTACCTGGATAGCTAAAGAAGGAACTATTAGTGCTAGCGATTTT  
CTTGGGCGGAATATTC GCTATG GAGTGC CGGAATTC GAATGGGCACGATTATGAAC GGATTAGCGTATA  
GTCAAGTATTC CGTCTTTTGGGGAACTTTTTTAGTCTTTTCCGATTATTTGCGTTCCGCGATTC GATT  
AGCAGCATTATCTAAATTGCCGGTAATTTATCAGTTC ACTCATGATTC GATTTTTGTTGGAGAGGATGGA  
CCTACACATCAGCCTATAGAGCAAATCATGTGCTGCGGGCTATTC CAGGGCTAAGAGTGATTC GTCCCTG  
CGGATGC GAATGAAGTGAAGGAGCATGGTTAGCTGCTTTAGAAAAGCGCTGGTCCAACAGCTTTAATTTT  
ATCTCGACAAAATCTACCTACTCTTAAAGAGACGAAACGTTCTTTCAGAGAAG GAGTAAGAAA GGGT GCT  
TATATTC TGGTTAAAGAGGAAGGAGATCGCCAGACTATACGCTGTGTGCTTCT GGATCCGAGGTGCATT  
TGGCTATAGAGGTTGCACAAAGTCTTATGGCTTTAGATAAGCGTGTGC GAGTGATTTCAATTCCTTGTG  
GGAGCTATTC GAGAGACAAGACGTTGAGTATCGC GAATCCGTAATAGGAGGAGATTTA GGGTTGCGTGT  
TCTATAGAAGCAGGTACCGCCTTGGGTGGTACAAATACATCGGTAGCAATGGCTTAGCCATTGCCATGG

ATGGGTTTGGAATGTCCGGAGCTCCCAATGAGGTGGCAGAGACTTGC GGTTTCACTGTGGATAATATTGT  
GCAGAGAATCCTTTCTGTTTAGAAATCCCGTCAGAACTCCAGTTTGTTCAGAAAGAATCATCGGCT  
TGCCCAAATCCATGTGCGGCAAGCCTTTTGTTCCTTGATTCCTGGCCTGATTTCTTTGTAGAGAGG  
CAAACACCTCAACGCCTGTTAGTATATGCTCTTTGGTGTGAGAGTTTAGGACTGCCGAAGTCTTTCTT  
AGTTTTAATTCATCTTTTCGCAAAGGTAGATCCGATATCAGCAAAAGTGCTCCTAAAGGAAGATTCCTT  
CGGTATCCGTCAGCAAATAAGGTGGCACACTCCATCTCGACAGTTGAGCTTTATTTTCATATAGTTTTC  
GACGGAACTCTTTATTAACTCCAAAACCGAATGTTAGTCGTGTGGTGATGCCATATGGTAAGGGAG  
GTTTTTGGCTTCGAGAATATTGGTGATCATTTTTTGTACGACAAAATTAGCTAATGCAGGGACCTCTGGG  
GGGAAGTATGCATCTGATGTTCCATCTTTTCGGATGCTAGCAACAGGGACAAAATAATCTCCTATTTGGT  
AGTGGGATCTTAAGCCTCCGCACATGCCAACATGATCGCTGCTGTAGCATTGGGAAGGAAAGAACACAG  
ATCTACGGTAAGAGCTGCTCCTGGAGAGCCTAATTTAAAATCGATGATTGAGGTGTGAATTTGAGGCGCA  
TGCGCTGCCGAAAACATGGATCCFCGAGAAACAGGGACCTGATAGATTTTCAGCGAAAACATCCACGTAAT  
ACCCAAAATTAGTAAGAAGGAGATAGGGCTGGAATCTTGAATGGTAGAGCCGGTATAGCGCTCTAGCAT  
GTCACAGGCGATTGTTTCTTCGCTGATTTTTTTTATGTTGATGGGTATAAATCACAGATATTATAATGGT  
TAGAGAATCTTTTTTTTCTAAAAACATAGTATGAAGATGGAACAAGTTGTTCTCGTGAGGGTAATAGTTGG  
GCTACTTAAAAGTATAGTTTTCTTTTGCAGAAAAGAGGGAAAGCGTTTGTTCGCGACATTCCTCTGGAC  
AAAGCTTAGAAGAGAACGATAACATGGATGGAGAAAAGATAACGGGTAAAGCGTATTGTTTCGTGTAA  
GCACTAGTGAATTTTCGTGTAGGATGCGCGTTGAGATCGATGGACAACCCATATGTAATTTTGCAGAACGA  
TTTTGTAAAGCCAGGAAAGGACAGGCTTTTTAATAGAATCAAAGTCAAAAACTTTTTAACTGGGCGTGT  
ATAGAAAAACGTTCAAATCAGGGGAATCTATAGAAACTGCCGATGTACGGGAGCAGCAGATGCGTCTTC  
TGTACACAGATCAGGAAGGGCTACGTTTTATGGATGACGAGACCTTCGAACAAGAATCTATTTTTTGGGA  
CAAATCTGAAAATGTTTCGGAATGTTATTAGAAAGATACAATATATACGTTGGTTTTGTACAACGGGGAT  
GTGATTTCTGTTGAACCTCCGATCTTTATGGAGCTCACTATTGCAGAAACAGCTCCTGAGTCCGTGGGG  
ATACTGCATCAGGACGAGTATTGAAGCCTGCAACAACCAATACCGGGCAAAGATTATGGTCCCTATTTT  
CATTGAAGAAGGTGAAGTTGTGAAGTTCGATACCGAACAGGAAGTTATGAGTCTCGTGTATCAAAATAA  
AAATTAGAAGGGGCATTACGCCCCCTTCTCAAGAAGCGTTCCGCCACTTTCCGAAATAATTGCGAAGGT  
TCAAGATGCGCTTGAGGCTCTAGGTAGTCTCTAGTCGATTCGGCATAGCAGCCAATTTCTCTACCCAGG  
CTTTCTTTTTTTGTGTTTCTTGCTGGGAGATAGCTCGGTACGAAGTTTTTTTTAAAAGAGTCTCTCTGG  
CGATAGTTCTAACACTTTTTTTTTCTTTCATCGGGAGTCTTCCAGGTTTCGTTATTCCTCAAGTTGAGT  
GAGGATTTATAAAGAGATGGTAGTTTCTTCGATAGAAATGGTTAACGGAGTAGAGGTTTCTTAAGGTTT  
GTTAATGCCGCTGTTGCGATTTGATATCCCCCTTCTGGATGTAAGTCTATAATATGAAAGCGTGCATTTG  
AGGGAAGTGTAGTGAGCCGCTATTCCTACCAGAGGAGGAGATGATCAGTCTACATAATGATCATG  
TCCATGTAGATAACAAGCGTACAGAAGGAATTCATCAGTAGGGATTTTAGAGGGGCATAATTGAGTAAA  
TCATGAGCGGGTCTGTTGTGGGAGATAGAGGATTAATGGTTAGCCACAATCACGTGTTCAGAAGCGGGAA  
GAGAAGAAAGAAATGTTCTAAAGCAAGGAGTTGAAGTCAAGTCACTTCTCCATTCGCTGTATACCAACC  
ATTTGAAGCAAGAACAATCGAGAAGAACTAACCACCATGTGGGAGTGAGTTTTTTAAAGCGATACGGTGA  
GTTTTGAAGTTCTTTATTAGGAAAATAGGAATAAAACGTTTGTTTTTTCAAAGCCCGATGGGTGTATACAT  
CATGGTTTCTTGGAACTATATACACAGGAGCTACAGATTCACCGGAGAAAGAAATTCCTTAGCGAAACG  
GAATTCGATCGAGAGCGGTGATGGTCATATCTCCAGTCACACAGACACTATCTGCTTCAAGCTGCTTA  
ACGAGTTGAGGGAATCTCTGAGAGATTGCAAAAGCTTGAAGGAAACGCCTCCTATAAGTTGTCTTAGAA  
GTCCCTTAAAGCGTTTATTGAAGCATTGAAAAGGATTTTTAGGAGTACACAGAAGTGAATGTCGGAGCA  
ATGGATCAGTCTAAAGCGGTGTGAAGCCTTGTTTGGCATAGAGAAGCGATGGTTAATAGAGAACCCGATT  
TATTAACAAGAGCATACCCCTCGGTATGATAGGCAGATAGTTAGTAAAATTAAGTTTTTTTTCTTTTTGC  
TGCAGGAGTCGGTGGGTAGTGAAGAAGCTAAGAGAAGATCTACAGCGGTATGCAGGGAACAAGAAAA  
ATATCTAGCACAGCATTCAAAGGTGCAATGATTCCTGCAGAGATCATGCTTCTATTTGTTGAGATACAA  
CATTGAAGCCGAGACTTGAGTCCCTAGAGAGCAGAGTTTATCAGCAACAAGTTTTCCATCCATATACAC  
AGAGTTAACCAGTTGTTCCAAGAAGTTCGGCACCGGTCTGTAAAATCTGAACAGCAGCTTGTTCCTCT  
TGAGAATGCTCTGAAGAGGAAGAGAGGCTCTGAGTAGCGTAAAGAAGAGCCGCTCCGCCTCCAAGACGA  
AACCAGATTCCTTGTGTTGAGTTTAGCGTTTTGAGAGCTAATTCATGTAGGGGAGCTGTGTCTCTTAC  
CGGAATGATTGCGATACTGTTTTCTAAGCGATGTTTTCTTTTTTTAAGGAGTTTTTCGGATGTTTCGTCT  
TCTGAGTTGTGTATAGCGTGATCAGTTGTGCAACTTTTAGTTTTCACTACTTCAGGAACCAGATTCCTCAC  
AGACAAGTAAGGTATGATCGCGAGATAGTTCTGCCAGGTACAAGGATCCTAGTAGAGGCAGTTCTATAGG  
AGGCTTATTAGAGAAAGGCGGCGAGGAAAAGACCGTTGTCCCTGTAAGCAAAGCGATGTCTTCTAACAGA

GTGGTATCGGGGAT TGTCACTACTAGAAC ATCC AACAGTCCCCTATACGGTTTGCAATGCAGGTAGCTA  
GTGGGT CGGGAGCTATCTCCTTACAAAAATGATCAGAG GAGT TTGTTCTTCGGA GAAT TTTTTT GAGTAA  
GGGCAGAAAAGGAAAAAGACAAT GGAT TTTTCTGATCTGTGACAAAAATTTTAGGAGCTACAATA GGAT TT  
TCATGAAAA GAGT CATGAGGGAAAAATGACGGC ATTC GATAGCCCTTTTGCCTTGT ATTC CTTTCACCA  
GGTGTAGCGTAGAGCCGCTTCTTTGAGATAAAGCAACAGCTCCTTCATGTCCTGTATAGGCAACGGCTTC  
AGCAAAAGCCTCTCCAATAAGA GGAT CAGGAAGATGGGAAC GAAT GAGCCCAGACACTTTTGAAGCATCT  
TTTAAGAGAAAA GAGT GC GAAT GCAGATAGGCGCACACCGCCTCTTTTGTAGAGGCGAGGGCAGAAGCTA  
AAAGTCGAGGAGAAAAGTCCTTGATCGATAAAAAG GAAT CGATGCCCTTAAAAAGGCTCGTAAAA GAAT AAC  
AGAAGAGATC ACTC CATCAGCATGACGTTTAT GGATCC GTTTTGCTAGAGATCGAGCAAAATAG ACTC CA  
ATACGTTTCGAAA GGAT CAGAAAGTTC TATACGCGAAA GAAT ATGATAGCCTCTCCCTTTGAAAAATCTT  
TCGAAGAAGAG GAGT ACGCGGGCCATAAA ACCC CTTTACTATTTGATACGCCCTTATCAAGGCCGTGAAA  
CAGTTGAT GAAT AGTATTGCGATGCATCTCATTGTTGTGCTGAGGCATAGCG GGGTATCC TGTAACGGTT  
TCTTCATACCTAGAACACTACCA ACTC GCCAGTTAGATCACAACGAGATTTAAGAAGGTGGC ACCCGGAA  
TCGAACCGG GGAT AGAGGCTTTGCAGGCCTCGGCC TTACCGCTTGCGCATGCCACCGGGAGAT ATCCGAG  
TGTACGCGATGTTATGAGGAAAAGTCAATAACAGTGTGCATTTTCTG GGAT CTTTTTTTTGTAAGCAGGA  
TGAAGAAAAATTTTTCTGAAGCTTTTTTATGT GAGT GAAAAGCGTTTCTTTAGAGGTTGAAT TGATAA  
TGGAT ATAGAAT AATTTTTAAGACTGCTAGTAGAGGAAAGAAAAGA GAAT CTTTTTAGGAGATGGCGGGG  
GAGT GCGTCTTCTAAAATCTATTTCTTTGAGATTTTTTAGTTGTTGGT ATTC GGCACGAAGCCAAG GGAT  
CTGTTATGCGCCCTATTTTTGTTGGAA GAAT GGTCTTCTTTGTTATTAGGTATGGAA ATCC CTCGCTCGGG  
GAAGAAAGTGACAG GAGT TGCTATTGACAGTCG ACTC GTATTGCCCTGGGGACGTGTTTTTTGCTCTTCC  
GG GAAT CGAAC GAGT GGCCACCTATTTTTAAAAACAAGCAGCACAACTCGGAGCAGTTGCTGCTGTAGTCG  
CAAGCGATTATCATGGTCCAAGTTACGGTCTGCAGTTATTGCGTGTGGC GGATCC TCGAGAAGCTTTACG  
GGCAGCGGGCGT ACCC AAGGAGCTCTTTTCCATGGAGAAGTTATAG GAAT CACT GGATCTGTAGGGAAG  
ACAAC TACTAAAAATTTTTGCAAATCAGTTGCTTCTTCTGTCTATAAAGTCTTTAT GAGT CCCCCAAGCT  
ACA ATTC GCAGTTGACGCTGCCTTTAAGCGTTTTAATGGCCGATGG GGAT GAGGAT TTTTTACTTCTAGA  
GATGG GAGT TTTCTGAACCTAATAACATGAAGAAT CTTTTGGAGATCATTGAGCCTACAATCGGTGTGATC  
ACACATATCGACGTGCAGCATGCTATGCATTTTCT GGAT AAAGGGGCTCAAGGTATCGTCGAGGAAAAAA  
GCTTGCTGTTGGAAAGATGT GGGT TGCAGCTC ATTC CTAAAGACTC TTCTTGGTTTCAGTTTTTTGCAA  
AAAGA ATTC TGCAGCAGAGCGGTTTTCTTTTTCTATGAGCAATGAAACGGCAGATTTTTATTATCGAGCG  
ATTC ATTC CGAAG GAGT CCTTATTAGTGCCTGATGGGGACATT GAGTTGCCCTGCCGTATTTCCGT ATT  
CTCCAGCGTATAT GAAT TTTATTATTGCAAGTCTTTGGCTT GGAT TAC GAAT GTTCCCAT GGAT CGTTT  
AGAGCAGGT GAGT CAGTCTCTGTTTTTGCCTGCCATGCCGTTTCGAACAGCAAGAGCACAAATGGT ATCCGA  
GT GATTAATGATGCATATAATGCTAGTCTGATGCAATGCTAGCTGCTTTAGATGCTGTTCCCTGTTCCCTC  
CAGAGGGAGGTAAGATCATTTTT ATCC TTGGGCATATGGCG GAGT TAGGACGAT ATTC CGAT GAAT GCCA  
TATTGCTGTAGCTAGGAAAGCTGTGACAAAAGCTCACATCATCTTTTTTGTGGAGAGAAATGGTTCCT  
GTTAG GGAT ATAGTTCGTGATGC GGAT TGCCAGATT GGGT TTTATAGCGCAGTGAGCCGAGATTAT GGATA  
CCGTGAAAGCTCTCGTTCAACAGGGAGATGTTGTGTTGTTAAAA GGGT CTCGTAGTTTAGAACTAGAGAC  
TTTATTACCATGCTTTTCGATTT CATAGGTAAAAGAT CAGAAT TTCTTTTTA GAAT AGAAATAGTTAACT  
TTCAAGTCGCTGTAAGATGCTCTTTTTA ACTTTGCCTTTTGAAAGCTTAAGTTAAGATAGA GAAT TTCTT  
ATAAGAGCTTCCCATAATAAAAACGAGAAAACAGATGCTGCCCTTAACGTATGTTGTGAAAGCCTTTTCTA  
TTGGCTGTTTTTTAGCCTTTTTTTGATGAAACCTTTGATTTCTTGGTTAAAAAACAAGGTTTTCAAGA  
TCAT ATTC ACAAGATCACTGCGAAAAATTAGAA GAGT TACATAAAGACAAAGCATAT ATCC CTACAGCT  
GGAG GGAT AGTTTTTGTTTTTGCATCTGTGTTGGCGGTTCTTTTATTGTTCCCCATACAGCTTTGGTCTA  
CATGGTTTTGTATTGGA ACT ATTC TATTATGGGGAGCATTAGGAT GGTGCGATGATCAGATTA AAAATCG  
GCGTAG GAGT AGGGCAT GGGT TGTCTGCTAAACATAAGTTTCTTATACA GAAT TGTTTGGCGGGCGG GGGT  
GTTCTTCCATTATGTTTCGCATATAAAGAAAGTTTTCTTAGTTTT CATCTTCTTTCTAG GAAT CGTTT  
CTTTGCCACATCATTTGGTGGAGCTATCT ACTC AGTTTGTCTATTGCAACATTGGCTATTGTTGGAACGAG  
CA ATTC AGTCAATCTCACTGAT GGAT TGGAT GGACTTGCGGCAGGAGCTATGGTGATAGCCTGCTTAG GG  
AT GCTTGTGCTTGGCTTGTACTAATGGAGCTCCTTGGGCCTTCATTTGTTGTGTTCTTCTAGCTACCTTAG  
CTGGAAGTTGTCTT GGAT TTTTACGTTACAACAAGTCTCCTGCCCGTGTCTTTATGGGAGATACA GGATC  
TTTTGTTTTTAGGAGCCATGCTCGGTATGTGTGCTGTATTATTACGAGCA GAGT TTCTTCTCTTGTTTATG  
GGAG GGAT TTTTTGTTCTG GAAT CACTATCTGTGATTGTACAAGTCGGAAGTTATAAATTAAGAAAAGAAC  
GAGT CTTTCTTTGTGCCCTTTACACCATCATTAT GAGTATAAG GGGT TATCAGAAAAGGCTGTAGTGAG

GAATTTCTTAATTGTCGAGCTTATTTGTGTAGTAGTTGGATCATTGCAGTATTTGTGGATTAGAGGAGA  
GTTAGATGGGATTTGGAGCGTGTGTCGTTATCGGCC TAGGTGTCTCTGGGAGGTCATTGCGCGTTTTCT  
AGCTCAAAAAGGTGTATGTGTATTGGGTGTAGACAAGTCGCTTCATGCACCTTCA GAATTGCCCGTATATT  
CAGGAAAAATATTTGGAGAACGAA GAGTTCCTTCACAGGTGGAT TATGTTGTTCGTTCTCCAGGAGTAT  
CCAAGGAGCATCCTTGGGTACAGGCTGCGATAGCCTCGCACATTCCTGTGCATGACAGATATTCAGTTAGC  
TTTTCAAACAGAAAAATTTACAGAAAAGAGAGT CGTTAGCAATCACAGGGACTACAGGTAAGACAACCACA  
ATATTATTTTTA GAATACTTATTC AAACGGTCTG GGATTCCTGCTTTCGCTATGGGGAATGTAG GAATTC  
CTATTTTAGATGGTATGCA GAATCC TG GAGTGC GGAT TGGTTGAAATCAGCTCTTCCAGCTCGCTGATCA  
AGAAAAATCCATCC TGTCTTATCTGGAGGAATGATTC TAAATATCTCAGATAACCATTTAGATTATCAT  
GGGAATTTCTCTGAGTATTTTCAAGCCAAGCAAAATCTTGCTTTATGTATGCGTAATCCCGATGACCTTT  
GGGTAGGAGATGAGCGTTTTTACGGCCACTTGTATTTAGAAGAAGTACAGAAGTATATGCGTTTTATTAGA  
TAAAGAAAGTGCATTAAAACCATTTGTACTTGCATGATAAGTACAAC TACTGTTGTGCCTATCTGCTTGCT  
AAAATA GAATTC CCAATATCCGAAACTAGCTTTATAGAGGCTGTGGCTACTTTTAAACAAGCCTCCTCACA  
GGATGGAATATTTGGGGCAAAAGCAAGGCATACATTATATCAATGATAGTAAGGCAACCACGGT GAGTGC  
TACAGAAACAGCTCTTTTAGGGGT TGGGAATCAGGCAATTGTGATTC TCGGAGGAAGAAATAAGGGATGC  
ACGTTCTCTTCGCTTCTTCCCGCTTTCGCAAAAAGCTGCGAAAGAGTGTAGTCGCTATGGGAGAGT GCGCTC  
AGGAGATCGCTCGAGATCTAGAA GAGT TCCCTGTAACCGTAGTGAAAAATTTATCTGAGGCTTTACTATG  
TGCTGAAGAGCAAGCAGTGCCTGGAGATGTGATTGTATTGTCTCCGGCTTGTGCTAGCTTTGATCAATTC  
CGTAGCTATGAAGAGCGAGGGGCAATGTTTAAAGCATTTGGTTG GGATGGAAGAGGTTCTTTTAT GAATCG  
TAGAAACACGATGATTGTAGCAACTACTGT GAAT GCAGTGTCTATTGGCAGTGTCTTTATGACCGCGCGC  
CATTCAGAGCAAGAAATA GAGTATCC TCAGAAAAATAGCTCCTATTAAAATCTTAGAGCCCGTTCCGGTTG  
TTGATAAGGCTCCAGAGAAGTTAGAGAAAAGCCTGAGGTGATTGCGAAGCCTTCTCAGGTGCTTAGAAA  
TCC TGTGCTTTCTAAAGCTGAACCTGCTGCGCAATTTGCGGACAAAAATCC TAAGACAGAGAAG GAATCT  
AGCGGGGGCTCTAAAAAGATTTTCATCT ACCCCTGTA GAATCGACACTCCTGTGCTCCAGAAAATTTCTG  
TTGTGAACGCTAAGGTAGTAGAGAAA ACTCCTGAAAAAGAG GAATTC TCTACTGTTATTGTTAAGAAAGG  
AGACTTTTTTAGAACGTATAGCTAG ATCCAATCACACTACAGTTTCTGCATTGATGCAGTTGAAT GACTTA  
TCTTCGACACAGTTACAGATAGGACAAGTGTAC GAGT TCCTAAAAC GAATAAGACAGAGAAGGATCTTC  
AAGTGAAGACTC CAAATCCGGAAGATTACTATGTAGTCAAGGAAGGAGATAGTCC TTGGGCCATTGCATT  
GAGT AATGGTATTC GTTTGGATGAGT TGGTTGAAGTTAAATGGAT TAGATGAGCAAAAAGCTCGTAGATTA  
CGTCCAGGGGATAGATTAC GAATTC GATAAATCTCTG GAAT TATTATGAAATGGTTCCTGATTTCTGTT  
TATTAG GAATTTTTTCTCTCGGACTGATCATGGTGTGTTGATACCTCATCAGCAGAGTTTTT GGATCGAGC  
TTTTGCTGTAGTACACAAAAGCTCTG ATCCGGCAGATTACTTATCTT GGAT TGGGACTTGGTATCGCT  
TCATTTGTGTACATCTTAGGATGGAA GGATTTCTTGAAAATGAGCCCTATGTTGCTGATTTTCGTAGGGA  
TTACTC TTGTTTTAGTTCTTATTC CAGGTATTGGTGTGTTGTAGAAAATGGAGCTAAGCGTTGGCTGGGAGT  
GGGGCAGTTAACTTTACAGCCTTCT GAATTTGTTAAAATATTTAGTTCATGTGTGCTATC GAATGTTTA  
ACAACGAAACCTTCT ATTCGTAGTAGTTTTAAACG ATTCGTAGCTTTTCGTTGCTCTGTTGTTTATCCCA  
TTATGTTGATAGCGATTGAACCGGACAAT GGATCTGCGGCTGTGATCTCATTTTCCTTAATTC CAGTTTT  
TATCGTAACTGCAGTACGATTACGTTATTGGCTGGTTCCCTTTGCTATGTGTTCTGTGTATTGGAGGCACA  
TTTGCTATCGTCTCCCTTATGTTG GAATCGTTTGCAAGTTTACCTAC ATCCTGAAT TAGATATTAAG  
GAAGAGGTCATCAACCTTACCAAGCTAAAATTGCAGCAGGATCTGGAGGAGTGTTTGGTAAAGGTCAGG  
AAAA GGAT TACAAAAATTAACCTATCTTCCAGAAGCTCAGAAT GATTACATTGCTGCTATTTACGCAGAA  
GAGT TTGGATTTATTGGGATGCTCCTATTGATTC TTCTCTATATGGGATTTATTTATAGCGGGTATGTCA  
TTGCAATGCGAGCCTCGCTTTTATCTGGAGCGGCTCTTGCTATTTCAATCACTGTGATTATTG GGATGCA  
AGCTTTTTATTAACCTGGGTGTTGTTTCTGGGT TATTACCTAGCAAGG GAGTGAACCTTCCATTTTTTAGT  
CAGGGAGGCTCTTCTCTAATTGCTAATATGTGTGGCATG GGAT TGCTATTAAGGATATGTGATGAAGAAA  
ATCAACAAAATCGTATTGGCAGTGGGGGGAACAGGAGGGCACATT ATCCCTGCTCTAGCAGCAAGAGAGA  
CTTTT ATTCATGAAGACATAGAAGTCTTACTTTTAGGAAA GGAT TAGCTCATTTTTTAGG GGATGATTC  
AGAGATTGCCTATTGTGAT ATCCCTTCA GGATCGCTTTTTCTTTGCGTGTCAATC GGATGTTCTCTGGG  
GCTAAGCAGTTATATAAAGGTTATGTGCGAGCTCTACAAAAGATCAGAGATTTT ACTCCTGATTTAGCAA  
TAGGATTTGGGAGT TACC ATTCCTTACCTGCTATGCTTGCTTCTATAAGAAGTAGGATTCCTCTTTTTCT  
GCATGAACA GAATATTGTTCCCTGGGAAAGT GAAT AAGTTATTTTCACGTTTTGCTAAAGGTGTAG GGATG  
TCTTTTGCAGCAGCAGGGGAACATTTCCATTGCCGAGCTGAAGAAGTCTTTCTCCCTATCAGGAAACTGT  
CTGAGCAGATCGTTTTCCCTGGAGCTTCTCCTGTCA TTTGTGTGGTAGGAGGATCC CAAGGAGCAAAAAT

TTTAAATGATGTTGTTCCAAAAGCCTTGGCTCGTATTCGAGAAAGTTATTCGAATTTATATGTTTCATCAT  
ATTGTAGGGCCTAAAGGAGACCTTCAAGCGGTTTCTCAAGTTTATCAAGATGCTGGTATCAATCATAACAG  
TTACCGCATTGATCACAATATGCTCGGCGTACTACAGGCAAGCGATTTAGTGATTAGTAGATCTGGAGC  
AACGATGCTTAATGAGTTGCTTTGGGTTTCAGGTGCCATTCATTTCCTTATCCAGGTGCTTATGGA  
CATCAAGAAGTGAATGCAAAATTC TTCACGCATACTGTAGGTGGAGGGACTATGATTTTGCAGAAGTATT  
TAACAGAAGAAAGTTGAGTAAGCAGGTTTACTTGCTTTAGATCC TGCAACCAGTGAAAATAGGCGCAA  
GGCTATGCTTCCGCACAACAGAAGAAGTCTTTCAAATCACTGTATCAGTTTATTTGTGAATCTCTATAG  
GCTCATGATGAAAAGCTTGTTTTACCACCTTATTGGTATTGGTG GGAT TGGAATGAGT GCTTTAGCACAT  
GTTCTGCTCGATCGA GGATATAGCGTATCGGGAAGTGATCTTCCGAGGGGAAAAGTGGTAGAGAAGCTGA  
AGAATAAAGGAGCGGAATTC TTTT TAGGGAATCAAGAAGAACATATCC CTGAAGGCGCTGTAGTTGTATA  
CAGTTCAAGTATTTCTAAAGAAAATCC TGAAT TTTTATCAGCTAAAAGTAGAGGGAACCGTGTAGTTCAT  
CGAGCCGAAT TATTAGCCGAGCTTGCTCAAGATCAGATTTCTATTTTGTACAGGAAGTCATGGGAAGA  
CAACAGTCTCTTCTTGTATCACAGCCATTTTGCAGGAAGCAAAGAAAAATCCGTCTTTGCTATAGGAGG  
TTTGAATCAAGAAGGCATCAATGGTGGTTCGGGATCTGAATATTTTGTGCTGAAGCAGATGAAAGCGAT  
GGGTCTATTCGGTGTAT ACTC CAGAGT TTTCTGTTATTACGAATATAGATGATGAGCATCTGTCTAATT  
TTGAAGGAGATCGAGAGCTTCTTCTGGCTTCTTTGAAAGACTTTGC ACTCAAGACTCAGCAGATCTGTTG  
GTATAATGGAGATTGTCCTCGCTTGCCTCATGCTTGAAGGGCATACTTTTGGATTGGACTC TCTTGT  
GATCTACATATTC TATCTTATTATCAAGAAGGAT GGAGACTGTACTTTACAGCAAAGTATCAAGATGTAG  
TGTATGCAGATATAGAAGTGCAATGGTTCGGCATGCATAACGTTT GAATGCTGCAGCAGCTATGGGAAT  
AGCTCTGTCATTGGGTATAGATGAAGGTGCTATAAGAAATGCTTTCAGAGGGT TTTAGGAGTCAAAGA  
CGATTACAAAGAAA GAATTC TCTGAGACCTTCTCTTTTTAGAAAGATTATGCACACCATCC TTAGAGA  
TTTTCTGTACATTACGTGCTGTTCTGACTGCTGTTGGACAGAGACGTATTTTAGCTATTTGCCAGCCTCA  
TCGTTTTTCTCGATTAAGA GAGTGTATAGACAGCTTCCCGTCAGCATTTAAAGATGCTGATGAAGCTTG  
TTAACAGAAGTGTACAGTGC GGGAGAGGAGGCGGAAGATATCTCGTACCAAGAGCTTGCTGAAGCTATTA  
GTCAA GAGT CGATAGTAAAGTGTACGCATATTC CGTTTCATGAGTTGCAGAGACATTTAGAGCAGTCCAT  
CCGTGTACACGATGTGTGTGTATCTTTAGGTGCTGGTAATATTGT GAATTTGGGAGAAAAGTTAAGAGAT  
TTTGAGCCTCAAAAAC TGCACCTTAG GAAT TATTTGTGGAGGAAAATCATGCGAACACGAGATTTCCGTTT  
TATCTGCAAAAAATATAGCTAAACATCTTTCAAATCC TTTTATGATGTGAGT TATTTTTTAATTACTCG  
AGAA GGAT TATGGGAGAGCGTCTCTT CATTAGAGACTGCTGAAGACTCAGGAAAATCCGTTTTTGTATCCA  
GAAATAGCTCAGAGACTAGAAAAAGTAGACGTAGTGTGCCGATACTACATGGTCCCTATGGTGAAGATG  
GAGCTATGCAAGGAT TTTCTAGAGACTATTGGTAAGCCTTATACAGGTCCTGCTATCGCTTTTTCTGCGAT  
AGCAATGAATAAAGTGT TTTACTAAGCGCTTTATGAGTGATTTAGGGATTCCTGTCGTTCCCTATCTCCCT  
TTAACATTAGCAGGAT GGAAGCAAGAACAAGATAAGTGGTTAGCACATATTGTAGAGGCTTTTTCATTTT  
CTATGTTTGTGAAATCTTCGCATTTA GGATCTAGTATCGGCGTCTTCGAAGTTCATAATGTTATA GAAT  
ACGAGATGCCATTAATGAAGCTTTTATGCGAGATAACGACGTGTTGTAGAAAAGAAAATCGCTTAGGTTGC  
AAAGAAATAGAAGTTTCTGTCTTAGGAGATGGATCTGGTGCCTTGTGCTATTGCTGGTCTGCATGAGCGTC  
GTGG GAGTGGAGGTTTATAGACTATCAAGAGAAGTATGGGTTAAGTGGCAAGTCTAGTGCAGATCGT  
ATTTGATACAGATCTCTCTAAAGAAAACAGGAACAAATACTAGAAGCTGC GGATAAAATTTACCGTTTA  
TTGCTAGGAAA GGGT CGTGTGCTATTGACTTTTTTGTAGATGAAGAAGGAAAATTTCTGGTTATCTGAGA  
TGA ACCC ATTC CTGGAATGACAGAAACGAGCCATTTCTTACATCTTTCATTCGTAAAGGGTGGAGTTA  
TGAACAGATAGTCCATCAACTTGTATTGATGGGCTGCAACGATTTAACCAACGCCAACGCTTGATATCA  
ACGCTTTTTGTAGATCAAGCGTTCGCTATTCAGTAAGCTCCAACAAGAGAGACTC TTTGTTGGGCAATCA  
AGCTAATCATGATGATGAGAGCAGCTACAACCTGGGCATACACCTGCAAGAGATCGTACAATGACCGAAG  
GTTCTTCTTCGATGCTATTTTTCAGCAAAGAA GAATCTTCTTCGAAATCTTCGGCAGAAGCTGCAGAGAT  
ATAATCTAAAGACAAAAC TTTCTCATCTGTGAGAGAGCCGTTTTTCAGGTTGAGCAAGCTCAACAA GGAT  
TTTTTCTGCAATCTAGCGCTACACGTTTTA GAATGGTTCTTAGCGCTTGATGGTTTGTCTTTTCTCC  
CGATGATCTTTCCAATATCTTCAGAAGCGGCATGGATCTCCAGCTTAA GGGT TGGCTGGCTTTGTCTC  
GGATGACC GAATCTCAACGGCGTTG GGATCGGTAAC TAAATTTTTAACGATGTACGCTGCAAAATCTTCC  
ATAAAATCCAATGTAAAATGAGAAAATAAAACCTTGATAAGAGTCTCTTGCCCAAGATTGTGGGAA GAAT  
ATATGAAATTC TAAAAAGCGTCAATATTTTCGCTTATAGGCCACTATGGGCTAATTTATGGTGAAAAT  
TC TAGAGATAGAAACCTTTCATTTACGTTTAAAGTAAAAGATAGTCTTCGCAACGAAGGTCGCAAAATGAC  
AGCTTGTGAGGAGAGAAGGCTCCTAGAGAGAGT GCTTGTGATAGTGTGGATTCCAGGAAGGAAA GAG  
TCTTTACGAAAACGTAA GAGTGTTCAGAAGATAA GGATACCACAAATTCCTCC GGAT AATGATCGATTT

GAGATAAGTCAATGATGCTAGGAGGATCCATCTGTAGTTGATCTATTAGGCTCGTGACAATAGACAGTGT  
TTGATGTGGAATGCGTGTGGGAAAGAGCTTGTGCGAAAAGAAGACTGTAGGTAGTTCTAAGGATTGA  
AAAAAGGGCAAAGCTGGGAAGGTTGTCTTCATAACCTATGAATGTATGAGTTTGATTTCTAAAAAAG  
CTAATGGAGTATGCAAAGCATAGGAAATAGCTAAGCCTTTATGATCAGGAACCTTCTCAATAGAAATAAA  
AGAAAAACTCCTAATTCATTTAAAAAGTGCTCGGCAGACTTCGTGGAAAATGTCGTAAAGCTGGAGGG  
GAATCAGCAGAAAGATGCAAGATATCCGAGAAAAAGGCTCAGGAAGGCAAGGAGGCTCCGTACAGGTAA  
GAAACAATGTCTTAATAGGCGTTAGGAGTGTGAAATTTAAAAAACTAGGCAAGTTCAGCCATAAGCC  
GATGGGTAAAAAGACGAGAACGCTAACGAAGATACACAGGAAAGCGTAGGGAAGAATAATTCGGCCCT  
TTAGCAAAAAAAGACGCCATATATGTACTAAAAAAGAGGGGGAGCGGGGGGCAAAATAACCTCTAACG  
TGCATCTAGAAGAATCTAAAAAAGTGTCTTTTTTAAATAGAAAAAAGTGAGAAACCCCTTATTGGAAGA  
TAAAAGGTAGAGACTTCTCCGTCAAATTTTCATCATTAGATTACAAGCTGAATTAGAAGGCGAGATTA  
TGGAATGGATAGCAAGAAGTACAAAAATATTTTTATCGTTTTCTTTAAAAGGGGATATGGATGCTGTGAC  
GGTTCCGTCTTAGAAAGTTCCTAACAAAATCCATTGCAAAAAGGACGTGTTAATGTTTTGTTAAATATG  
GAGAAAGTTTTTATATGAGTAGTGCAGGTTTACGCACACTGCTCTCATTAGCAAAATTAACACAAAATC  
ATAATGGGAAGCTTTGTATCTGTTGTCTTAGAGATGAAGTTGCTGATATTATTCGTATCGCAGGATTGGA  
TAAAGTAATCACCATCCGTAAAGCAGAACAAGAATCTTTTAGCGATTTTTAAACTATGTCCTCATCATCC  
TCTTCGGGAGCTGCAACTGGATTCGCTGTATGTTCCGGATCCGCAAAAATCTTTTTCAAAAATGTTAAGC  
GGACAGTGATTCGTGGCTGGGCCAACAGGATCTGGTAAAACAGCGTTTTCTCTTAAATTGGCGCCTCT  
TGTGGACGGAGAGATTATCTCCGTAGATTCATGCAGGTGTATCAGGGAATGGATATTGGAACAGCAAAA  
GTTTTCCCTAGCAGACCCTAAGGAGGTTCCGCATCACTTGATAGATGTGTGTCATGTCCAAGAGTCTTTTA  
ATGCTGTTGATTTCTATTATCATGCAGTGCAGGCATGTCAAGATATCTTGTGCGTAATAAAGTCCCAT  
TCCTCGTAGGAGGGACAGGTTTTTATTTCCATACTTTTCTATCAGGTCCGCCATCTGGGCCTTCTCCAGAT  
TTTTGATTTGCGGGAGCAGCTTACATTAGAAGCGCAGGAACGAGGAATAAGCGCTCTATATCAAGAATTAG  
AGCTTTTGGATCCGTTTTATGCAGCCACTATTACCAAGCATGATAAGAATAAAATTTATTCGTGCTTTAGA  
AATTTATTCGAAAAACAGGGAGTAAAGTATCTAGTTATGCCTGGCAATCTACCGTAAATGAATCAAAAAG  
TATCATTTGTCGGGGGTGGCTTTTATCTCCAGATCCAGAGTTATTGCGCCATAATATTTTAGAACGATGTG  
ATCAGATGTTAGAAGAAGGGCTTTTAGACGAGGTGCAGGCTCTTTTAGCTGCTGGATCAAAGGGAATTC  
TTCCGCATCACGAGCAATTTGGATACAGAGAATGGATAGAGTTCTTGGATTTAGGAAGCCCACCAGACTTA  
TTTGAGATCACGAAGCAAAAATTTATTACCAATACGTGGCGTTTATACTAAGAAACAGCGTACCTGTTTTA  
AGAGGTATTCCTTTGTTTAGAGAACTTAGGCCATGGGGATGACTCTGGATGATATGGCAAAGAAGATAGC  
GCAAGACTATTTTCTTTGTGGGTAAATCCTCATCTAGCTAAAGAGAGCGGGCGGTAAAAGGTATCTCGTT  
CTACAGGAGTAAATCCTGCTTGAAGTAGCATTGCGCAGATCTCCTTCTCAGAGCTTTGCAGATCCAGCC  
TGTGCATTTGTGGACATTTTCATCAAGTATTGTGCCACCGAAGTCGTGCGCTCCATAAAAAGAGTCCCTTA  
ACACCCTCTTCCCTTCCCTTCCCAACCATGATGCTGCGATGTTGGTCAAAATTTATCTAAAAAATTCCTTG  
CCACCGCAAGAATGCGGTAATAAGAGTTCGGGAGACGCTTGGTGAGGGACGCGCTCCCTAGTGTGTATT  
ATTAGGTTTATACTCCAAGGGATGAAGCTAAAAAATCCAGGATTCCTCATCTTGCATCACGAAAGAGTT  
TGATAGTAGCAGAATATCTTCTGGCTTTCTACATGGCCAAACATCATGGTTGCTGTTGAACGGAATC  
CTAAGCGATGAGCGAGTTGTGGAATGATATCCAGCCATCCGGCCCCATTTTTTTAGGAGATATTTGTTT  
CCGAATTCCTTCAGATAAGATTTCCGGCTCCTCCTCCAGGAATAGTGCCTTGACCAGCTTCCCAGAGACGT  
TCCAAAGCTTGTTCGGTAGAGATCCCGGATATTTGAGCAGCATGTGCGATTTCTACTGCAGAAAAAAGT  
GCGGGTGTAAGAAGGAAATTCCTTTTTTGTGATGGAACCTAGAGTTTCTAAGTAGTCAATGCCAATTTG  
TGGATGAATCCTCCTTGTAGCAAAAACGGTTTTGATGCCAGCTTGAACATAGCGCTGCATTAATTTGCGG  
AATTCATCAAAGGAGAGTAGATAGGCATCGGAAGAACGCGTTTTCTGTAATAAGCGCAAAATGCACAAAT  
CTATTTTACAAATGTTTCGTGTAGTTAGGATTAGCATCAAGGACATAGGTAATAGTATTTTGAAGGTAGCG  
TTGTTTGCCTAATGAATCTGCATGGATTCGAAGCTCTTCCAAGGGGGAATAAAGAAAAAGGCGGAGTCTT  
TCCTGGAACGAAGTCTTGTGAGATCCATAAAAACGGTTGACGATAATGCATTTGCCAGAGCAAACTTT  
GACTACCAATGTTTTTTTTTGTCAAGACTCACACTAACCAATAGTTATCATATGGATATTCAGAACAGG  
GCTCAAATACACCAGAAGTAGAGCAAGCAGCTTGTGCAATCAAGAAGCGGCAGAAAATGATCGTGCTAA  
AGATAAGCTCTCTTCTCAGAGATCTCAGCAGAAGCTGTCCAAGAGTGCAGTCAATGGAAGCTTTTGAG  
CAAGTGGTTGCAGAACGCAGCTCAATGAAGAAAAAGATTTTATTTGCATTAGAGCAGATGGGAGCTTTGC  
TAAAAGGTGCGGATCAGAACAGCGATTTGAAGCTGTTCTGGAATGTGAGAAAGTTTTGTCTACCTTTATT  
CCAGCAGTTGGAAGGATCCGTTTCAGCGAGCCAATCTTTGGGGGCGTTACACTGAATTAACAAGGGAAGGG  
CGTTATATCAAGACTTTGCAAGATGAAGAAGGCGTTTCTTAGTAGGACAGATTGAGCTGGCTATTTCTT

GTTTGAATCTGGTGTTCAGGGATTTTTCTCAAAAACAGAGAAAGAAGAGATCTCTGAGGAGGATCGAGC  
TGCGTTAGAAATTCCTAGTTTGTCTGCACATAAAGATTTCTATTTGTCTACGCATGCAGATCTGCGCTGG  
TTAGGAAGTTTCTCTTCTCAAATTATCAATTTGAGAAAAGAGCTTATGAATATTAGCATGCGTATGCGGC  
TGAAAAGCCAGTTTTTTCAGAAGTTATCCGTTTTTAGGGAATAAGGTATTTCCCTCGTAGAAAAGAATTAAC  
CGAGAAGGTGAGCGAACATTTTGCTCAAGATGTGGAAGCTTTTGTAGAAAGATATTTTTCAAGAGCCTCT  
AGAGAGTCTCTTAAGAAGTCCGCTTTTTCTTAAGAAAAGAAATTAAGAGATTGCAGCAGGCTGCTAAGT  
ATCTATCTATTTCTTCTGAGTTTTTCTTCGACACGTTTGGGACTGAGTCAGTGTTGGATCAGCTTAA  
AGGCTTAGAAAAAGAAATCCGCCAGGAACAAAGCCGTTTGGCTGCTACTTCCGCTGAATATGAAGGAA  
GTTCAAGGGCGTTTAGATCAGGTAGAAGTCCTTTTACAGGAGAACGAAGAGGTCCATAAGATCCGTAAGG  
AGATAGAGGCAATTTCTAAACATATTCGAGGAATCTCTCTGGTTCATGATGATGTTGTTCTATTGAAGGG  
CCGTATTCAGACTTTGTTAGGAGAGGTCCGAGAGAGAGAAGCTGTCATTGAGAAAAGAAATGAAGGAGT  
CAAGCTAAAGCAGAGCAGGCTAGGGCAGAAGCAATTC AAGCACTGGAAAACGAAGTGCAAAGTTTCTGTG  
ATCAATGTAATGAAGGAGATCTTCTGAAGGGGCTAAAGAGCGTTGTCAGGAGCTGAAAGAAGCTGTGAA  
GAAGATGGCTTATCTGCCTTATGCGAAGAAAGTAGCTTTGGAT AATCAAATCAACGCTGCGCAGAGAAGC  
GTTCTTGACGGCTAGAAGAACAATGCTAGCTTGTCCAGATGAAAAAGTATTAATATGCGGCAGGTTT  
TGGAACAAA GAATGCTGCGGGCTAAAGAGCTCAAAGCTAAATTTGAGTGTGATAAGAAATTATTAGGGGG  
ATCCGGCCTCGATTTTGACCGTGCTTTGTCAGTATAGTGCTATGGTGAAGAGGATAGAAAGGCCCTTGAA  
GAGCTTGATGCAGCCATTATC GAGTGTAAAAGACAAATACAGCAGTTTGTTTAAAAGCTGATAATGGAGG  
AGTAAAAACAAGTAGTCAAAGGTGAAGAGCCTTTTGGCTATTTTTTTTTAAATGTTTTAAAAGAGTGGCA  
ACTTAGGACTGAAAACATCTATGTATACAGCGTATCC TAGATGGTTAGGTTTGTCTCACTACAGGTTT  
TTATGTTTCATGATGAGAACGATCGCAAATGTTGCGAAAAAGCCTTAGCTCTTTGAAATAAAAAATATGT  
CCATAA GGATAGCAGAGAAGTCCATAATCTTGCTCTGGCATGGAAGTTAGCTT GAGTACGGTGACTAGGTT  
TTTGAGAAAGCTCTTCAAAGAGTAGGGATCTCGCTAGAGGAAAGAGGCTATTTTTGGTAAAGAATATCC  
ACGAGAGCTAGGGCTCAAAGGGATTTTTCTCTCTAGAAAAAAGCTCGACCTTATCTTAGATAATCGGTT  
ATTC TCAGGCCAGTTTTATGGATTCGTTTTGTTTAAATTTATTGAAGGTAATTGTTAAAGCTATTGATAA  
CAAAAAAGGCCGTAACCCGTGTTGTTT TAGACGTTCAAACATTTCCCAATTAACAGATTATTTTTGTTTTT  
GTTGAAGGGAACGTTGGGTTTCACATTAAGCTATAGCTGACACAATTATAGAGGAGTAAAAAACTAA  
AAGTCTATCCATTGAATGTGGAAGGACTTAGTCATAGTGATTGGGTGTTATTGATTACGGATTTATTGT  
TATCCACTTATTTGTTTCTTTCGGTACGAGAGCAGTATTGTTTAGAAGAATGTGGAAGGACGGAGCAATC  
ATTACGCTGATTGTCTAGCTTCTTAAAGGAGAAAGTATGAACAAAAAACGTGTAGTCTTACAGGAATG  
GGGATCGTCTCCTGCCTTGGGAATGAAGTAGAATCTTTCTATGATAGCCTGTTGGCGGGAATTAGTGGAG  
TGCGAACAATCACGCTTTTTCCCTGCGATGATTATGCTACGCGTTTTGCTGGCTGGATAGAA GAATTTAA  
CTCAGAGCCTTACTTAGATAAAAAACAAGTTAGACGAGTTGATCCTTTTATTACTTATGCAGTTGTAGCC  
GCAAAGAAGGCAATAGCTATGTCCGTTGGGATCAAGATACTCTTCCCGCAGATTC TCATCGTTGTGGG  
TGATTATTGGTTCTGGAATGGGAGGATACGAACCC TGGATGAGG GGATTGAAAACTATCGGCTGGAAA  
TAGAAAATTATCTCCATTCCTTATTCCTTACATCATTACGAATATGGCTCCGGCTTAAATCGCAATGGAT  
TATGGGTTAATGGGACCTAATTATTC TATTTCAACAGCCTGTGCAACAGCCAACACTACTGTATTGATGCCG  
CTTATCAACACCTCATTGAGGGTTCGAGCAGATGTTATCGTTTTGTGGAGGAACTGAAGCGGCTATTAACCG  
TGTTGGTTTAGCTGGATTTATTGCGAATCGCGCATTGTGAGAAAGAAATGATGCTCCAGAACAAGCTTCG  
CGCCCTTGGGATAGGGATCGAGACGTTTTGTTTTGGGGGAGGGCGCAGGAATTC TTGTTTTGGAAACCC  
TTGATAATGCTTTGAAAAGAGGGGCTCCGATTTTTGCGGAGGTACTTGGCACATATAAACGTCGATGC  
TTTTCATATTACTGCTCCTAGAGATGATGGCGAAGGAATCACTGCCGTATATTTGGGAGCCTTGAATAAG  
GCTGGGATTCCTAAAGAACGGGTGAATTATATTAATGCACACGGAACGTCGACGCCCTTAGGGGATCTAT  
CAGAGGTATTGGCTTTGAAGAAAGCTTTTGGAAAGCCACGTCAAAACTTGC GAATGAATTC AACGAAGTC  
GTTGATAGGGCACTGCTTGGGAGCTGCAGGAGGAGTAGAAGCTGTTGCAACCATTC AAGCCATCCAGACT  
GGGAAGTTGCACCC AACAAATCAATGTAGAAAATCCGATAGCAGAAAATAGAA GAATTCGATGTGGTTGCGA  
ACAAAGCTCAAGATTGGGATGTCGATGTAGCTATGTCAAATTC TTTTGGTTTTGGCGGACACAATTC AAC  
GATATTATTTTCGAGGTATGAACCTTCAATTATGATGAAAATAAGCAC GAATATTC TTTTGGCGTTATTC  
CTATCAGATTTTTTGGTACTCCGGATAGAAGTACCTTAAAGGCTTGTTTTATCTGCCATACAGATGGGAA  
ACATTGGGTTTCCCTAAGGGGCATGCTGAGGAAAAAGAAGGCCCTCAGGAAGCTGCTGAGAGAGAAGTT  
GTAGAAGAACTGGTTTTGGGGATGTTAATTTTTTCCCAAAAATATTTGTGGAAAATTATTCCTTTAATG  
ACAAAGAAGAAATCTTTGTGCGTAAAGAGGTAACCTTATTTTCTTGCAGAGGTTAAAGGCCGAAGTACATGC  
TGATCC TGATGAGATCTGTGATGTGCAGTGGCTAAGCTTTCAAGAAGGTTTACGCCTTTTAAATTTCCCA



GAAATTCGTAATATTGTTACGGAAGCAGATAAATTTGTTCAAAGTTATCTATTTGCTTCATAAAGTCCCC  
TAGGATGAAAAAACTTGGTTAGGAAGGGCCGTTGTGGAATCTCCACAACAGCCTTTTCTTTTCTGTGTC  
GATTTACATAAAAAGATTGCAATAGTCTTCGTGAGCAAGACGAATGACTTTTTGAGCTTCTTTTGGCCG  
TATAAACCTACAATTTCAATTTTAGCTGGTTTTGCTTGAATTAAGCTTCTGGAGTAGCTTTATAGGTTA  
AGAAATAGTGTTGGATCATGTCCAAAACGTGCCTGGGCATTCAGAAATATCTTCTATATTGCCATAGAC  
TAAATCATCTTCTAGAACAGCGATGATTTTATCATCGGCTTCTTCCGAGTCTAAAATACGAATCCCTCCG  
ATAGGACGCGCTTGAAGAAGGATGTTCCCTTGTGTAATATTTTTTCCGTTAACACACAGATATCAAGAG  
GATCGCCATCGCTTGGATATTCCTCTGTTACTTTGTTGACCACTGTATTCCTCCAGAAAGATCTCCACA  
ATAAGTCTTAGGTAACAGCCCGTATAAGCAAGGACAAAAGTTAGAAAACTTTTGTGGCCGATCCACTTTT  
AGGATACCAGTTTTCTTTATCCAGTTCGAATTTAACGGAGTCCGGCTGGAGTATTCTATATAGCAACAAA  
GAGATTCATAATCATCGCGTGTAACTACTGGCCATGCCAAGGATGAGCTATGGATAAATGGTGTTTTAGA  
CATAAGATCACTCTCTATTAAGTGTTTTATGCGCAATTATCCTGCGCATCCGGCTTATTCGTCCAGATA  
GTTTTAGTCTTCTGTTCTCGCAGTAAAACTTTTATTTTTATCGGCAGCCTTTCTTTTTGCTTTTATTC  
TCATTGTGAAAAATGTTGAAAAGTTACTCGTGGCAATCCTTTCAGACAGGTTTTTTGTACGAAAAGACGAG  
AGTGATTGTACTGCAAAATAATATGAGCCGGACGTAGGATATGAAATACTCTTTGCAAATAGAAAGACCTA  
CATATTGAAGGATATGAACAGGTTTTGAAAGTTACTTGCAGTCTGTACAGTTAGTTGCTGTAATTGCTA  
TTCATCAGACAAAAGTGGGCCAGCTTTAGGAGGCATTCGTGCCCTCCCTTATCTTCAATTTGAGGATGG  
TTTTACAAGATGCTCTACGTTTGTCAAAGCAATGACATACAAAGCTCTTCTCAGCAGTACAGAAACCGGA  
GGCGGGAAAGTGTCAATTTTTCTTGCCAAAAGGATGACTAGTCCACAGAAGGAATGCTGCGAGCTTTTG  
GGCAAGCTGTAAACTCTTTACAAGGGAAGTACATTGCGCCGAAGATGTGGGGTCTCTGTTCAAGGATGT  
CATGATTATTCGTGAAGAGACACCGTATGTTTGTGGTCTTGTAAACAGTCAGTGGAGACCTTCTATTTAC  
ACAGCTCACGGCGTTTTTTATGTATTCGAAGAACTGCAGATTACCTTTGGAAAACGGATATACGAGGAA  
AACGTGTCGCTGTACAAGGGTTAGGAGCAGTCGGACGTAAGTTGGTGCATGAACTGTTCTTTGCCGGTGC  
AGAGTTAATCGTTTACGACACAAGGAAAGATCTTCTCGATGAAGTAGTGACTTTATATGGCGCCCAAGTG  
GATGAAAATATCATCTTTCGGATGCGATATTCATGCCCATGTGCCTTAGGTGGAATATTAATTCGA  
TGAGTATCGATCAGCTGCGATGTCGCGCTATTGTTGGAGCAACCAACAATCAATTAGAAAATCCGCTAT  
AGGCAGAGAATGGTTGCTAGAGGGATTCCTTATGCTCCAGACTATCTTGTAAACGAGGAGGCTTATTG  
AATGTCGCTGGTTCCGTAGGGCGAGCTTATTCGCCTAAAGAAGTGTAAAGCAAGTGAAGGCCCTGCCGA  
AAATACCTCGTAAATTATACGAACAAGGGCTAAAGAAAACCGAGACACAGGGACGTTGGCTGATGCTAT  
AGTTGAAGAGCGCTTAGCTGTTTATGCTTAGTAGCAGAGACATGAGTGGCAAGGGGGAGCATGTTTTGAG  
TAGCTTGGTGACGTAGTTTGTATAAGTCTCTAAAATCGTGTCTATGCATTTGCTCGTTAGCAGAAGCAAG  
AATCAAAGGATGTCTATCTAGATATAAATTTGGATTAGAAAAGGGAGAGGATTCCTCCGATATATCTGTA  
ACGAGCCTCCAGCTTCTTCTATAAGAAACACACCGGGAGCATGGTCTCTGTAGTGGGCTCGTGGAGGGG  
AATACGGGATGCGAATGAAGAAGTCTACCGTATTATCTGCAACCCAAAGCGTATTGCAATTGACTATCTGC  
TCGGATAGGCTGAGGATTCCAAGGGAGGTGTTTACTGAGAATATGTGTAGCTAAATGTTGATGGTTTCTA  
GCTGATAAGGAGGCTTACAGAATTTACAGGTAGGCTGGAAATCTTCTGTCAGGGAGAAGGGGAAGGAAT  
GGGTAGGATTACAAATCGTAAGTCTTTCGCTTTGGCTGCCGAATAGATTTTGAAGAGTTATTTTTAGA  
AGAAGGGCAAGCGATAACGGAGAGAACAGGGGTATGTTCTGTAATAAGAGAAAGAGCGATGGCGAAACAA  
CGTTGTTTGGATGAATCCGAAGTACCGTCGATAGGGTCCGTTAACCAAATAGTGAAAGTGGGAGCTTT  
CCGGAGAGAGGGCCTGATACAAATCTTGACAGGAGACTTTGGATCGAGCTGCTGCGCAAATGTAGGAT  
TTGAGGGATCCTAGGGTGTCCGTGGCAGGATGAGAGTTCCTTCTCCGACCAGCGGATATGCGGAAAT  
AAAGATGTCAGTTTTTGGTAAAAATAATATTGGATAGCGTAATCAGCGGAGTAAACGTATGTCTGGTCAG  
GCTTTTTCCAAAAGGGAATAAATTTATGAGCTTTTCGATAGCGCATCAGTGACAGCATAGCCTGCATGAC  
AACTGTTTCCGACGTTTTTGGCAGTCATTGAGGAGGGAGAACATAAGCTTTTCCGCTGGTTGCAAAGAG  
GTAACAATCACTACTATAGGGAGCGAATGTTGCTGTAGTGAGAGGACATCCAAACCAGAGAGATAGTTT  
CTTAGCAAGAGCAGAGCTATTGTAAGTGTGCGCAAATAACTTTGGATTTCTGTAAAGATTATTAACGAAAA  
ATATGAAGCCACGATATCTTTTTGATAATAAATGAAAAGAAATAGTTCTTTTTCAAGATGCAAACCTGTAA  
TTTTGGATATGGAATATGCACTCTTTGGTGCAGGAATAATTTAATAAACCAAGAGGAAGTATGAAGAT  
AGGGTTTTGGCGTAGACTGTATGAGGTGTGTTATACTTCTCTTATAAGGTGCGCTTTGAAACTTCGCTAT  
CGTGTATTAGTCGAAGGGATAGAGTCTATTAACCAAGATTCAGAGAGGGAGCTTTATTTCTTTCTAATC  
ATGTAGCAGAGATAGACCTGTCAATTTAGAGCACGTGTTTTGGTTAAAGTTTACAGTGCACCTATAGC  
GGTAGATTATTTATTCATAAATCCAGTGGTAAAATGGTTTTCTTGATTCGTAAGAGCCATCCCTGTGCC  
TCCGTCGTCCCTGGAAGGGATGATAAGCGTTTTGCTTGAAGGATAGAGCGCTTTTATGTATGCGTGACCC

AAGCGCTAGATCGTAAGGAAAGCTTGCTTCTTTATCCATCAGGACGATTGTCTAGAAATGGGAAAGAAGA  
GATCGTTAATCAGCAGGCAGCCTACACTATTTTGCACCGGGCGAAGGAATGTGATGTATTC TTAGTTAAG  
ATCACAGGACTTTGGGGAAGTTCTTTTTCACGCTATAGAACAGGAAGCACACCAAATTAGGTAAAGTGT  
TTAAAGAGGCGGTGAAAGCCTTGTGCGGTGCGGAATTTTCTTCATGCCCAAACGCGAGGTACGGGTTC  
GGTTTGCCTGCAGATTACTCGGTATTGAAGCAGTCCCGACAAAACAAGAATTC AATACTTTCCTCTCG  
GAT TGGTTTAATCAAGAGGGGGGGGAGACTCCTTTAGAGGTCCCCTACGCATAGGTAAGAGATGCGAGAT  
AATAGGAATACAGCTAGAAGTAAACGCGGAAAATTACGATCAGAAAAACCCTTTTACGCAGTTTTTTGA  
AGCTTTCGCGAGAGATGACTACGGCGACGGTTTTTTGGGATGAGCAACTTGAAAAGCTTTCCTACAATCA  
AGTGTATAAGGCTGTTTGTGCTTTAGCGACACGTTTAGCAAATATCC TGATCAGCATATTGGAAT TATG  
ATGCCCGCATCAGCAGGCGCCTATATTGCTTATTTTGAACGCTTCTTTCAGGGAAGATTC CAGTGATGA  
TTAACTGGAGTCAA GGGT TCGGAGAAGTAACGGCGTGCCAAACCTGGTTGGTGTGACTCATGTGATTAC  
AGCAAAGCCTCTTATGCAGAAATGGCGCAGACGCATGGAGAAGATGCAGAATATCC TTTTTCCCTAATT  
TTTTCTAGATGAGGTTCTGAAGGAAT TATCTTTCCTAGAGAAGTGTCGAGTGGGTATTTGCATGTCCATAC  
CTTTTGAATGGATGATGCGCTGGTTCGGAGTGTGATAAAGACCC TGAGGAT GTTGCTGTCATTC TGTT  
CACGTCAGGAACCGAGAAACTCCAAAAGGGGTTCCTCTTACTAATGCCTCACTACTTGCTAATCAACGG  
GCCTGTTTTCGATTGCTTTTTCTCCGAAAGAAGATGATGCAATGATATCC TTCTTCCCCCGTTTCATGCGT  
ATGGGT TCAATTC TTGTACGCTGTTTCTTTGCTATCCGGGATACCTGTTGTTTTTGCCTATAATCC TTT  
GTATGCGAAGAAAATAGTTGAGATGATTGATGAAGCAAAGGTCAC TTTGCTAGGAAGTACGCCTGTTTTTC  
CTCAGTTATATTATTAATGCTGCTAAGAAAAGCGAGACCACGCTTCTTCTTGCCTGTTGTTGTTG  
GAGGAGATGTTTTCAAACACTCTTTATATCAAGAAGCTTTGAAAAC TTTCCACATGTTCAACTGCGTCA  
AGGATATGGAACTACAGAATGCTCTCCGGTTATCACTATTAATACTGTGAATAGTCCGAAACATGAGTCT  
TGCGTAGGCATGCCTGTTAGAGGTATGGAAGTGTAAATTGTTTCTGAAGAACTAAAGTCCCTGTATCAA  
CCGGAGTAACAGGAT TGGTCTGACACGAGGAAC TCTCTATTTAAAGGATATTTGGGAGAAGACTTCGG  
ACATGGATTCATAGAGTTAGCTGGAGAGACTTGGTATGTCACCGCGACTTGGGTATGTAGATCGCCAT  
GGGGAGTTATTC TTTAAAGGACGACTCAGTCGTTTTGTGAAGATTGGGGCAGAAATGGTTAGCCTTGAGG  
CCATGGAGAGTATTATTATGGAAGGATGTGGGCAAATGCTGCCGATCATCC TTTGGTGGTTTGCGCCCT  
CCCAGGAGAAAAAGAGCGTCTTTCCTATTCACGATATTC CCAACTTCTGTTTCGGAAGTAAATGATATC  
CTAAAAACTCCAAAACCAGTAACTTATTGAAAATTTCTTATCACCATCAGGTAGAAGCGATTCCTATGT  
TGGGACGGGAAACCTGATTACTGTTCCCTTAAATGCTTTGGCAAACGATTATTTAGCGAATAAGGACT  
GCTCTTTGAATGATTATAGCTATGAGGGAAATGGGT TTTGAAGGAAGCTCTTCTATTGATTTTATCACT  
AATGATTTCCCTGGATTCTCTCGTTAGATAGCTTAGTTCATGCTGTTGAGGCTCGTTATCGGCTTTTATT  
GTAGAGACAAGCCTCATGCGCAGTTAGGTTATGGAGGTTTCGCGCGCTATTTTAGGCTCTTCCCTCGCTGTT  
AGATGGGTAGAGCATCAAATAGCGCACTTTTCATGGCGCTCCAGAAGCTCTATTTTGCCAAGTGGTTTTT  
GTTGCGAATACTGCGATTTGTGCGCATCTATCTCCGTAGCGGAT TATGTGCTATGGGACGAGCAGGTGC  
ATATCTCCGTTTCTACAATCTATCTGTTTTTTGTGCGGGTGGCATCAGAGTTCCGCCATAATGATCT  
GGATCATCTAGAGTCTTTATTAAGAACTTTGTGCAGCAACGTGGTTTTCAACGAGTATTTATCC TCGTCTGT  
TCTGTCTATTC TTTTAAGGGTCTTTTGCTCCTTTGGAGCAAATAGTGGCATTGTCTCATCAGTATCACG  
CTCAGTTGATAGTTGATGAAGCGCATGCTGTGGAT TATTTGGAGACGCTGGGAAGGGATTTTGTGCCTC  
GTTAGGGTATGAAAATTTTTATTC TGTACTCGTTACCTCAGTAAAGCTTTGGATCCGCGGGTGCAGCT  
TGGTTATCTTCTTGCATAGGAAGCAGGATTTGATCAAAGAACCTATGGTAAGCTTTCTACAGGAATAC  
CTCCCTATTTGTTAGTATCTATACAAGTTGCATACGAATTTCTCTCACAGAAGGAGA ACTTGCAGAAAC  
ACGATTACGTCGTTATTCGTGACTATTTTGTCAAAAAATCTCTTGGGCAGCAGCTGGATTTGTGCAACCG  
CTCTCTCCTCCCTGGATCTCTGAGCAGGAAT TGTATCAAAAATAGTTGCCACAGGCATTCGTGTTGAG  
TCGCTTGTCTCCTACAGGTAAGTACTGCGAGCAAATTTACATGCTTTCAATACCGAACAAGAAGTAGA  
TATTTTGGTTTTCGTTGCTTGCCACGGAGCAAGTAACGTATCAGAA GAATGTCGTAACAGGATCTACATCA  
ACAATGCAACGCAC TTTAGAGGACAATTTTGCAGCGGCTAATGCCCTTGAATCTGTTTATTCGCCACGA  
GGATGTTGCGAGT TTTGATTAGAAATGATAGTGAAATAAGTCTTTTACTTTGAAATGTCCACAAGGAGA  
TATTTCCATAAGAGAGGCTTGA GAATCCAAATTTTGTTTAATCAGTGTGTGTACACGCTGAGT TCCCTTT  
AAAGTATAATCCGAGCATT TTTCCAAGAAAAATACAGCGGAT TAGTCGTGTGAACGGAGGATAGTTACATA  
CTTTTCTCCCTAAGATCTCTTCCCTGTAGAAAAGCTGGGAAATCTTGTGCTAAGGCATGAGATATAGTCA  
GTTTTGAGGAAGAAAATGTTTTGGAT AAGA ACTTCTCTGGAAGGTGGCTGCGTCTGAGCGTCCAGTGACT  
TGAGTAAATCAGTTGAAAGACTTGTTCGCTGCTCGAAAATCTGGAT ATATAGACCA GAGTCTCCGCTTA  
AAACTACAGAAA GAGT CACGGCAGGAAAGTGCATACCTTTTGAATCATTGTGTGCCAATAA GAATATC

GGCTTCCCTGTAGCAAATTGTTAACTAAAGCATCATGACTTCCGCGGAATCGTGTGGTGTCAGAATCT  
AGCCGTATAGTGC GGGCTGTTGGGAA GAATTC TCGGAGAAGAGTCTCAATTTTTCTGTTCCAGTGCCTC  
GGTATTGAAGTGT CATAGTGCCAGGCATTGAGGGCATGAGGTAATGGGCTTTGAGAGCGGGT GTTGCA  
AAGGTGACACAAGA GAATCC GCTCAGTTTTGTGAAATGTCA GAAT CATGT CACAATGAGGACATTTCAAG  
GTGTACTTACATGATGAGCAGGATACATTAGTATG GAATCC GCGACGATTGAAGAAAATAATGGTCTGTT  
CTCTACTTCCAAACGTTGCTCGATGCTCC GAAT GACCGTTTTGAGAGAAGAAAGGCTTTTTTCC GAGT TTT  
TTCTATCTCCAAGTTCATGTGATAAAGAAAGACTTTAGTAG GAGT AGACGTAGAAGCTCTTTTTGAGAGA  
ACGGAAAGCGTGTATTTCTTAGATAAAGCATTGTGTAACTTTCTAAACTTG GAGTGGCGCTACCTA GGA  
TGACTGTAGCATTGGTCATTTTTCCCTCGCATGACAGCCACATCTCGAGCTTGATAAAAAGGAGGCAAATC  
GCTTTGTTTTATAGGCGTGTGCTGCTCTTCA TCCACAATAAT GAGT CCTAAGTTTTGTATAGGACAGAAA  
ATGGC GGATCGAGGGCCTATAATGATGTTAATTAGGCCTCGAGACGCCTTGTGCCAGGTCTGTGTACGTT  
CACTGTCACTTAACTTGTAGTGTAAAACGCCACTTCGGAACCAAAGTGCATTTTTAAAAAGGAAAGCGT  
TT GAATGGTTAAAGCTACCTCAGGGACAAGAA GAAT CACGCTCTCCCTAAAGCTCTAGCTTTGC GAATG  
ACTTGCAGATACACTTCAGTTTTCCCGCTCCCTGTC ACTCC GAATAGCAGACAGGTTTGAAATTTGTTCCG  
CAACGAGCGATTGCGAGATGGTATTGATTGCATCTAGTTGTTCTTGATT GAGTGTGGGGGTCTCTGGGAG  
GAAATAATGGAGTGTTCGTCTT GGATTTCTAGATCTGCTGAGT CGACAATGC GAATGAATTTTTGTTTT  
ACCAAGGCATCCAAAAGTTTTTG CAGATACCTCTGTTTTTCTCATCAGCTCAGGGG GAGTGAGAGGCTTTG  
TCGTTTT GAGTAGTTACGCAGAACAGCGATTTGCTGT GGGT TATCAAGCGTTTT GAGTATTTCTTGTGT  
ACGCTCTGCATTTTTGCCCTAAAAATACATTGTTCTGATGCTTAGTT GAGT GCGTTTGC GCGTATACCGTG  
GGTAG GAATAAGGATACGGCGCTTCCAGAGGACAAAAGTAATATTGACTGATCCAAAAATCAAATCGA  
TAAGGTCTTGGGGAA GGGTAATGCCTTCATAACTGATATCTAAAAATAGGCTGGATTACATGAACAAAATC  
AGAAGAACTTTTAATTTTTGAGCACAATGGCAATTTTATATTTGTCATTTGTCAGTTTTCTTTGCAGGGGA  
ACCTTAACAACAGATCC TACAGTTACTAGTTTTCCA ATTCAGCAG GAATGCCGTAGTCTAGGATTTTTAT  
TGATATTTGCATTGACTATGACTTCTGCATAGAGGCGGAAAGGCTGGT GAGTAGGGTCCATAAATCTCTT  
TTTAATGCT GAATCTTTTTCATATTGGGAAGAG GAATAAATGGGTATGCAGTTACTTTATCGTGC AAAA  
CAGGATCGTGATAGTTCACCTGCGAATTTTTATACCTGATTGTTGTAAGGGCGCTAAACAAAAA GGATG  
AGGG GAATGACTAAAATCAGACAAAGTTTTTTGGTAAAAAAGAACGAGGCGAGTAGGAAAAATTTCTGT  
GAAAGAATTTTAGCTAAGCGATTAAGAAAA GAATCTCATGTTCC TGAGATTCATGGACAAAAATGCCAC  
ATGAGGCCCTTGCAGGTCGTT GAATATAACGTTTTAAAGCAGGATAATTTTTCTTTCAGTAGTTCTTCATG  
AGAGAGTCCAGGGTAAATAGGAACACAGGCCAG GAGTGTTTTGGATTC TTTAGGATGGGAAGGTGGGGGA  
ATAGAAGTTGTAACA GGGTCTTTGG GAGTTTTCTACCGGAAGAGCTTGC GGTTC TAAGCCTGGG GGAT TAA  
GAATAGGAGCCGTGGATGGAGATAAGTCCCTCGGAAAAGGTAAGAGGTTCTTCTGAAAAATATAATGGGAC  
CAGTATAGACGTGGCG GGGTAGGGCTTTTTCTGTGTAGCGATTAAAAATTTCTTGAAAAACAGTAAGT GAA  
TG CATGGCGTGTCAACAGGTGCACAGGTTGTAAAGAGAGACATTGTTCCGGAG GGATAAGGTTATCAGCC  
CAGAC GAATTCATTGCAATCCACGCATCATTGTTATCATATTAAGGCTAGATAAAGCAATTCCTTACAA  
TTAAACAAAGAGAGAAAATTTATGAGAACTGGTTATTAGGGAGCTTGCTCATCGCATGTATGGCGGTCAC  
AGCTCCTTGTTTTGTGCAAAACGTCGTGCTGC GGGTTCGCAGAAGATCAATA GGGTGCAGAGACCGGA  
ATTCACTGGATGTCTTATCAAGATGCTTT GAATAAGGCAAAACAGGAAGGAAAGCATGTAGCCGTATTTT  
TCACAGGATCCGATTGGTGTATTTGGTGTATGA GAATGCAGGATCAGATTTTACAAACAGCTGCATTTTC  
C GAGTTTGCTAAACAATATTTGTGTATGGTGGAGATAGATTTCCCTCACAAACAAAGAACAAACTGCAGAA  
CAAAAAGAGCAGAATCGTCATTTGAAAAGTTTATATTC TGTAGAC GGATTCCT ACCCTAGTTTTCCCTCG  
ATTC CGAAGGTAAAGAAGTCGCAAAAATGGGATTTGAGCCTGGAGGCGGAGAGGCATATGTTTATAGATT  
AAAGCAAGCATTACATATCTCCT GAGTACGCGCGTAATTCCTTTTTTAATAAGAGAAAAACGTGTTCC  
ATTC TC GGATTTCTAAGAAAGAGAAAACG ATCCAGTTTTCTCTTCTATTTTGGAGAAAGCAAGCTGCAT  
ATCC TCTCTTCAAATTTCTCAAGTTTGATGTAGCATGAT GAGTCTGCTTAAGACTTTAGTGATTGTC  
GTAAGAAGAAAAATATTGCTACTATTTTTGAGCCAAAGGACGGTTGATGTCTGTAGAAGTT GAATACTTG  
CAACACGAAGATTATTTGTATAGAACAAGCAAGCTAAAGGAAATCAGAGATTTGGGCATAAATCC TT ACC  
CTTATCAATACACTGATTGTCTTGAAGTACAGGAA ATTCGTAATCAGTTTGTAGATAAC GAATTAGGAGA  
TAGCGAAGCGGCTTTTCGTAAAGAGACACCTAAGGTGCGTTTTGCCGGACGACTTGTCTTTTTCCGTTCT  
ATGGGGAAAAATGCTTTTGGGCAGATCC TCGATAATGATGCAAAAG ATTC AAGTGATGTTCAATCGAGATT  
TTTTCTGCAGTGGCA GGGTAGCCCG GGATGCTGGATTTCTCCGATTAAATTTATTGAGAAGAACTTGA  
TCTAGGAGACATCTT GGGTCTCGAAGGGTATCTTTTTCTTTACTCACTCAGGAGAATTAACGGTCTCGTT  
GAAACGGTAACGTTGTTATGTAAATCC TTAATTTCTTTGCCTGATAAGCATGCAGGAT TAGCAGATAAAG

AAATTCGCTATCGCAAACGTTGGGCAGATCTGATTTCTCAGAGGATGTGCGTAAGACTTTCTTAACAAG  
AAGCCGGATTCCTAAGTTGATTCGTGAGTACATGGATCAGCAGAGCTTTTTAGAGGTGGAAACTCCTATC  
TTGCAAACCGTCTACGGAGGAGCAGAAGCAACTCCTTTTGTTACCACGCTGCAAGCGCTACATGCAGAAA  
TGTTCTTAAGAATTTCTCTAGAGATTGCTTTGAAAAAACTCCTTGTGGAGGAATGTCCCGAGTTTATGA  
AATCGGCAAAGTTTTCCGTAACGAAGGAATCGATAGAACGCATAATCCAGAGTTTACCATGATAGAGGCT  
TATGCGGCTTATTGGATTACAATGATGTAATGAAATGTGTGGAAAACCTTGTGAGTATATCGTACGTG  
CTTTGAATAACGGGGAAACTCAGGTTCAATTCACATTTAAAAATCAGGACCTCAGGTTGTTGATTTTAA  
AGCTCCATGGATCCGTATGACGATGAAAGAAAGTATCTCTGTCTATGGCGGCGTCGATGTAGACTTACAT  
GCAGATCATGAATACGTAATAATTTAGAAACACAAACATCTCTCCAGAGAAAACGTATGTTTCATGCCT  
CACGAGGAGAGCTGATCGCTTTGCTATTTGATGAGCTGGTTTTGTGATAAGCTCATCGCTCCGCATCACAT  
TACAGATCATCCATTAGAAACAACGCCACTTTGTAAAACATTGCGTTCTGGGGATGAAACTCTGGTAGAA  
CGATTTGAGAGTTTTGTTTAGGAAAAAGTTGTGTAATGCTTATCCGGAACCTAATGATCCTTTACAAC  
AACGAAAATTGTTGGAAGAGCAAATGCGTAAAAAAGGCTTTAAATCCGACAGCGAATACCATCCATAGA  
TGAAAGAAATTTCTAGAAGCTCTTTGCCAAGGAATGCCTCCTGCAGGAGGATTTGGAATAGGTATCGATCGA  
TTGGTTATGATGTTGACAGACGCTGCATCCATTCGGGATGTCTGTTTTTTCCCTGTTATGCGGCGTATAG  
AAGCAAAAAAAGATTAAAGTTTTTTTCACTTTTATCCCGTTTTTGCCATCTTCAATGGCAAAAACCTCGGGA  
TAAGATCTCATCACGTAGACGATCCGCTTCCCTGCCAGTTCTTCACTTTTTCTAGCAGCCTCTCTTTGCTCC  
ACAAGAAGTAACACCTCTTCTGGAATATCTGGTTGTGAAAAGGGCAAACCTCAAGCATTGATCTATCT  
TTCTTAGTAAGGCGAAGAAATGTTGCGCGTCTTGTTTAGAAAATACGGAAGAGTCTGTTTTCTGTCTGGAT  
ACCAGTATGTTGGTCAATGCTGCTGTTTATTTTCCGAATAAAAATCAAATAAAGCGGCTAAAGAAGAGGAG  
ATATTCAGGTCATTCGTCAAAGAAGTAATGAAGGTTTCTAAAAAATTTGACAGGCTGTAGCTACTTCAG  
GGTGTATGATGTCATCAGGATACGAAAGGATCTCCAGCCTACAAAATAAAGTCTCTTAAGCGTTTAAAGTGA  
CTGGCGAGAAGCATGCAATCCCTCTTGAATAAAATTTAACTGCGTTCTGTAGTGCCTTGCAGCAAGAGA  
TAACGGACTTCCCTCTCCAGAAAATCCCTGGTCCAGCAAATCTCGTAAAGTGAAAAAGTTCCCTAAGCTTT  
TAGACATTTTTCTTCCATCAACGAGGAGGTGATGAAGATGCAGCCAATAACGCACAAAAGGGTTTGTGTGA  
TAAGGATTCGGATGTTGCGATCTCATTTTTCATGGTGAGGGAAGATATTATCTACTCCTCCAGCATGAATA  
TCGAGGGATTGCCCAAGAAGGGACATAGACATAATGGAACATTCATAATGCCATCCCGGGCGTCTTTCC  
CAAAGGACTTTCCCAAAAAATCTCTCCATCGCGATCAGGATCATAAGCTTTCCATAAAAACAAAGTCACA  
CAAGTTATCCCTTATCATATTCATCTGCATCGATACGTGCGCTATTTCTGAGCTCTTCTAAATTTAAGTGA  
GATAGAGCTCCATAGTTAGGGAAGTACTGATGAAAAAATAGACAGATTGGTCTTGGCCTATGTAGGCAA  
CCCCTTGATTGATAAGTTGCTGAATAGCTTCAATCATTGAGGAATGTAGTGGGTGGCATGGGGATGAGC  
ATCCGCTTTCAAGATGTGCAGAGTTCTAAATCTGCAAAAAAAGCATGAATATAAGGCTGGCAATACTTT  
TCAAGGGAACAACCTTTTTTACGAGCTCCAGCTAAAGTCTTGTGCATCGACATCTGTGATATTCATCACGT  
GATAAACGAGTATCCATAAAAGAGCAGGACTCTTTTCACTAGATCTTCAATATACGTGCGAAAATT  
CCCTATGTGTGCGTAATCATAACCCGTAGGACCGCAGGTATAGAGCTTGACAGGATCGTTAACAGGGAGA  
AAACGTTCCCTTCTCTCTAGATAAGGTGTTATACAGAAATAAATCTATAGCAGTATTCATACGAAAAGGCC  
TTGTTTTTGTACTGTTAGAGCGAATCCATCCCTTCATGATAAGCAACCTTTTCTCCTTAGTCTATAGAAT  
TTTCCACAGAGCGGGATTCAGCATTCCTTGTAAAGGAATAGAAAATATCCAAAATCAGAAGCATAGC  
TATGTCGTTTTCAAGAGAGAATCTTTGTTTGTCTTTAATGAAAAAAAGAAATATACACGAAAAGTGTTCGA  
AAAGCTGCTTTGGGAGAGGGTTTCTCTGGGTTTTTCGATGGTGTGCTTATTTCTAACGAACAAGTAAGGAG  
TAGGAATTCATGCTTCTTTTACGGATTGCTAGAAGTTGCTCTTTCAAGCAGAAAACTCTTTTGGCTGCCC  
TAGTTTTCTTTGGACTAGGTGCGTCTCAGGTATGCGCTACTCCTTAATTCAGAGAGATTGCTTGGTA  
TGATAGATTATCAAGAAGCTAGGGACGAGAGTAGAGAGAAAGATTTACCCATGTTGTTGTTTTTCTCTGGC  
TCTGATTGGAATGGTAGTTGTATGAAAATCCGTGATGAAGTGCTAAGCTCGTCGGATTTTCATCTCAGCTG  
TTGCTGACCAATTTGTGTGCGTAGTTGTGATTTCCCTCGTCATACAGAGTTGCGAGATCCCTCATAAA  
CGAGCAAATGAAGATTTAAAGAAATAGACTGTATGTCAATACCTTCCCTAGTTTGGTATTGTTGTCCCC  
GAAGAACGAGCGATCTATAAGATCGAAAGTTTTGGAAATGAAAATGGATCGAATCTAGGAGAGAGCTTGT  
GCAGAGTCAATTGCTAATGACCAGGAAC TAGAACAAGTTTTTCCCCTACTATCCCTACACTATCTTCGGTAGC  
GTTACGAAAATACTATCAGCTCGCTGAAGAGCTATCGCGAAAAGATTTTCATGGCAACAGCTCTTGAGCAG  
GGGGTGTGTGCGATGATAGCTTTTCCCTATCCGAGAAGTTTCGGCAGCTCGTTGAAGCGGGTAGAATGG  
ATTCAGAGGAGTGTGCTGCTGTGAAAGAAATCGGTTGCTAGAAATAGATCCTGAGAATGAGCAGCTCACGCA  
TTTTACAGTGGCTTTAATTGAATTTCAAAGAGTAGCTAAACGTTCTCAAGGGCAGTCGCACGTGAATGTT  
GCTGAAGTAATCGCACCTTTAGCAGAAATATCTTACACAATTTGGAGAACAGGATAAAGAGAACCAGTGA

GACTTGAGATGATTATTTCTCAATATTATCTCGATGCTGGGCTCCCTAATAGTGCGCTAGAGCACGCAA  
GATAGCTTTTGAATCGGCTCCGCAAGATATCCAATCCAGCATTTCCTCGTTAGTGCATATAGAACAC  
CAATCC TAAATATAACTCACAAATCTAGTATTCCTCCCCATTC CATGCCTCTATAGCGTGAATGGTTTT  
TTTTAGGATTTCTACCTCAGCATCTGGATGAAGAGGCGAGGGCAAAGCCTCAGGTATGCGCTGAAGAAG  
TTCTTCTGATAGTTTCAAAAAATCTGGCTGC GAATTTCTCTCGGAGAAATAACCACCTGACAACCGGA  
AGATTTGGGCGTACATGTCTAAAAGCCTCTCGTACGATCCGCTTAAAACGATTGCGTTGATGAGCTTTTC  
CAAATTTCTTTGACACAGTAATTCCTACTTTACTGGTGTTC GAATGACGAGAGGGAACGACCGTAAAGT  
CACTTGATCGGCACGACAACAACGTCCATTCCTCTGAACATAAACAAATTGTTTACGTTTCAGTAAACGA  
GCATTC TTAGGTAAAAGTTAACCGACTCACGAATAGAAGATCTTAAAGATCAATTAAGGAATGTCTACCAT  
GACGGCGACGGCGATTCAAAAGATTTCTTCCGCTTTTTGTAGCCATGCGAGCTCTAAATCC TACGGAAT  
TCTACGCTTTCTTTACTAGGTTGATAGGTGCGTTTACAATACTCTCCTAATACTCTTGAAGTCTTTAG  
GGACTCGCCCCAAAGAGACTAGGGACGAGTTTAAA GGATCTCACCTAAAAGATCAATACAGGGCAACAA  
TTTTTATGATTTCTTGAGTAAAAGAAAGTAGTTCCATTAGTAGATA GAATTC TGAGCAAGTCTCTTATTGT  
CAAAAAGTGAGAAAA GGGTAAATTTTGTTCCTCTAGTTGTAAATCC TCCTTTATCC GGGAAAGCTCTTG  
TTTGCAATTC TGTGTATGGAGCGTGGGCTAGTGCCTTAG GAATGCGTAGAGAGCAGAGATCACTGTAAGA  
AACTTTTACGGTTTTTTAGTTGTGCTGC GGATTTTTATAGCAAAA GGGTACTTCTTGTCCGGTAGGAGGAG  
GCTGTTTTGCTAGGGGCTCTCATTTCTAAGTATTTTATGTGGTGA GGGTGTAGTAA GAATCAGTCTCTTT  
TTTAAAGAGCCCAAGTAAGGCATATTATGAGAGT TAGTTTATCCATCAAAGCAGACCCCTCAAAGGTGAC  
AAGCTTGTTCGTCGTAAGGGACGTCTTTATGTTATTAACAAGAAAAG ATCCCAACCGTAAGCAGCGTCAAG  
CAGGGCCTGCTCGTAAGAAGTAATATATAGATTTAGGTGAGAACGCATGGCGAAGAAGT CAGCAGTAGCT  
AGAGAAGTTAAACGTCGAAAATTAGTAGAAGCTAATTTT CAGAAGAGAGCAGAGCTTCGAAAACCTGCGA  
AGAGT TTATCTGTTAGCGAGGAAGAAAGAGAAAAGAGCTCGGGAAGCTCTCAATAAAATGAGAAGAGATAC  
TTCTCCTTCTCGTTTACATAATAGATGCCTATTAACAGGCCGTCTCGT GGATACCTTAGAAAAGTTTGT  
ATCTCAA GAATTTGTTTTAGACAAATGGCTTCTATGGGAGATATCC CAGGCGTTGTGAAAGCAAGTTGGT  
AGGACTTGTGTTGAGCCCCTTGAAAGGGGCTTTTTTT ACTCGTCTTTTACTGTTCTGAAAGTTCCGGTA  
TATTC TTTTACCTTTTCCCAGTTAGGCATTCCTTTCTCCATACCCATAATTC TTGGGGATCGATCC CTT  
TTCAGGAGAGT GTTTTGCATTC TTTTAA GAATGCGGT CAGCTGTACGATGGAAATAGGACCGACATTAGTA  
CAGTCTTTATTTAAGTAGAACCACTTTTCTGTATCAATCGCAATTTGATTCATTGTATCTGGGATGGAAA  
TAATTTCTGAGT CCTCTAAAGTATTC TGTAAAAG GAATTC TTCG GAATCTTGCTGGTCCATGGAACGATT  
ATCTTGTGTAGAAGAAGGAAGAGGGGGA GAATTAATAGGAAGATAATGGCAAAAATACCAAAAAACATT  
CTGCCAAAAACCAGCCTATTAGATTGCGATTTTTTTTTATTAGCTAGGTACCCGTAAGCATTC CAGAC  
AGATGTACAGTAAAAAAAAGGT GAATGGGAACATTC CGGAGTTCATGGGAGGGCTGCCTAATTTTAAAGTT  
CGTTGTAATAATCACATTATTTCTTAGAGCAGCTTTTCTCGCTAAAAAAAAGATCATCATAGTACCTTT  
TTCTCGAGAAACAAAAACAATCAG GAAT TACTTTTGCTTAGGAT GAAGAACAACAAGGAAGATTC CAGAG  
GCAATGCCAAAGAAAAAAGTAAGGAAGAACCAGCGACAGGACGGCGATGCTTCTTTTAGCCAGTAAGT  
ATCC TAAGCATCCAG GAATGATGCCTCCTAGA GAATCTCCTAGCTTGATGCTGACTAGTGTCAAACCAT  
CATTAGCAAGCAGATAAAACAGCTCAGTATATCTATACGATATTGCCTATATTC TATATTTGAATTCATT  
AAAAATAAATGGGTTCGCTTTTCGTTTTTGAAAAAACAATATTAAC GAGTAGATGATTTCTTTTCTAAAAA  
AGCTCCTGTCTACAAGTTAGGGAGCGTTTTTAGAAAAGAGAGCAGCTTTGATCTTGTTATTGACTTAGATT  
GCAGTAACTTTT ACCCTCGTCTCCAGTAACTTTCTTGGTAAAAAAAAGCTTTTGAAGTGTGCTGTAA  
AAATTTTTTGGCATAGAAATAGAGCT GAATAGAAGAGACAAGATCACGA GAATGAGGCAGCCGA GAGTAT  
GGAT AAGCAAAGATTAATAATTAGATGTAAGAGAGATT GAATTC CCAGAAACAGTCTTTAGTCGCGATATA  
GAGACCGTGTGATTC AAGTGATCATTC TTCCTACTGCTTAGCAAAAATCGATGGGT TTCATTATTAGGCG  
GGAATCTCATTGACACGCTTTTTGGACGCGATATCGAA GAATGAAAGGGATCTATGTTGAGCAGGATAG  
CAAGAATTC TTTGGTAAAGGTTG GAGTTGAAGT GAATGTGGACTACG GAGTTTCTATCCCTGAAAAACA  
GAAGAAATCCAAGGCTGTATTGTATCCGAAATCTCC GAATATACGGATTGATGTTGCTGCGGTTTCATG  
TTGTCGTCAAAGGATTAACGCATCCAAAAGCCAAAGGATGAAGAAGTTCTGCTATTTGAAGTTATTGAAGA  
ACCTTGTTTAGAG GAATTGCCCTTCGGCAGAA GAATACTTAGAAGAAGTTTCTGTGATTCAAACTGAA GAA  
TAAAAGGCTCTGTATAGAGCCTTTTTTTTTGGTTAGGATCCTCGGTATGTTATTTCGGGT TTGGCGCCTTCT  
TCCTGGATCCGTT GAATGTCTTTTGTGTGATTC CCTGTACGGTTTTTAACTC TTCCTCCGAAGCGATGA  
ACACACGTTTCCAGCTTTTAAACTTTTGAAGTAGACGTTTTGTTTTACTTCCAGGATTC CAGGGAT TTT  
TTTTGTAGTTAGCACTGCTTTTTGCATGTTTTTTACGATAGTGTT GAATCGCGAAACGGTGGGCTTCATCT  
CGTAATAGCTGAAAGAACTGAA GAATTGC GGATGTG GGATGAAGAA GGATTC CTTGGGGGAAAGTTTAC

AAAATAGCTTTTCTTGGCGCAAGCTTTTGGCTGTGATTGCCAGATTCCTTGGCGATGGTTACTACGGTAAT  
CCCTGTTAAATTCAGCTCCTCTAAAATGCGTTGCGCTCGTTTTAAATTGATTACGTCCACCATCGATTACT  
ATTAAGTTTGGGAGTCTGTAGTAAGGGATCGGAAACGTCGTGTTAAGACCTCTTCAAAGCAGCCAAGT  
CATCGCCATGAGAAGTAATAGAGAAGGTGCGATATTGTTTGGGAGAGAAGAGATCATTTTCGAAAACAAT  
GCACACACCGACATTATGCTCACCTTGTAAGTGTGCATTGTCATAGCACTCAATGCGATATGGATACTGG  
CTTAAATTAAAGAAAATGTTGCAGCTCTTCATAAGGAGGAGTGATAGAATTGAAAGGTTTCGCTTGTTTCAG  
CAGCATTTTTATGAGCAAGAGCAAGAAGCTCTTTTCCGTATTCGTGTTTTCGGGCAGCGGATTTTTGGCGG  
TTCAGCAGTGTTTAGTAGATAGGGGAGCTCTGGACTGTCTAAAGATACAGGAACAAATATTTCCCTGGGG  
ATACGAGGATTTTTCTGCATAATATTGCAAAATGAAAGAAGAAAATAAGGCAGAATCTTCCTGAGCATTTT  
CTGGGAAGATAAAAATAACGAGCGCCAAGTAGTTTCCCAGAATAGACGGATAGTACAGAGACAATAGCGAG  
AGAACCCTTCTATAAAGGCCTAGTACATCGATATCATATGCTTGAAATTTCTCAACATGCTGTTTGGC  
ATAGTTTGACGGATCAGGGTGAAGTGCGATACAAAGCTGCGGCATGTTCAAACCTTTTGTCTTGAGAGG  
CTTTTTCAATCGCTTTTTCTAAGTTAGATATTGTGGAACGCACATCTCCTTTAAGAAACAGAATGGCTTT  
GTCCAAAGTTTTCTGGTATTCGTTGAGAACATAATCCCTACACAAGGAGCTAAGCATTTTTTCATTTCA  
TAGAGGACGCAAGGACGTTGGCGAGTGCAGAAATTCGATCGGAGCATGTCCTCAAAGGGAACCAGAGGC  
TAATGACTTCTAGCAGGGCATAGCAGGCTTACGACATGACATAAGGCCCGAATAACCACTGTTTTTTTTT  
ACCTGGGGAAAGAGCCCGTGTTCGTATAGCTTCAATTCATAGGCCAAGGATGTTCCAGGGATACAGATAGG  
CAGAAAAATGTTTTATCGTCTTTGAGAAGGACGTTGTAGCGAGGCTGATATTTTTTGGATTAAGTTGTTTT  
CTAGGAGAATGGCTCTGTTTCATTTGAAACAACAATCGTGTCTATATCTGTAGTTTTTTTTTCATTAATAA  
AGGGATGCGTTCACGGGAATCGCTTTCTTTTGAAGATATGAAGAAAGTCGATTCGTAATTTTTTCGCC  
TTACCTACGTAAAGAACGTTTCCCTGGGAGTCTTTCATTAGATAGACCCAGGAGAGAAGAAACGTCTT  
TTAAAGAAAAATCCCTATGCGCACGCAGAAAAATCGTAAACAAAAGAATTAACACATGACCAGTTGTTG  
AGCTTTTTCAGGCTCTGGGCGTAGATCTGGGCCCTTCAATTTGATGCAAGATCTGCTGTGCTCTTGATACA  
ACGGAAAGAGGAAAACCTGCAAGCTTAGCGACATGAATGCCAAAACTTTTTTTTCGAGTGGCCTTTTACGA  
TCTCGTACATGAAAATAGGTTGTCCGCTATTTTTCTTAAACCATAGCGTGAATAATTTCTACATGCTGACA  
GTGCATTTCTAATTCGGTAAGTTCTTTATAATGGGTAGCGAATAGTGTTTTTGCTTTTTTCCCATCTGTA  
AACAGAAGGAACTCTACTACAGCTTGGGCAATAGCAAGCCCATCATAAGTACTTGTCCCTCTACCGATTT  
CATCAAAGAATAACCAATGATCTATCTGTTGCATTGTGCAAGGATATTTGCCGTTTCTGCCATCTCTACCAT  
AAAGGTAGACATCCCTTTAGAAAGTTATCTCCAGCGCCAATACGTGTAATAATTTTATCTACTATACCA  
ATATGAGCAGAACGTGCCGGTATGAAAGATCCCATTTGAGCCATAATGACAAGGAGTGCAATTTGGCGAA  
TATAGGTGGATTTCCAGCCATATTAGGCCCTGTGAGGAGGATCATTCGTGTTTGGGCACTGTGCATCAC  
TGTGTCATTAGGAATAAAGTCCCTTTATCTAGTAGGGTCAGGGCGACGGATGCATTCCTTTGGTAATG  
GATAAAGCATCGCTATGGTCAACGAGGGGGCGGATAATCATATTCGTCAGCTAGTTCTGCCAGAGATA  
CCACATAGTCTAAGTCTGCAACTGCAGTGGAAAGTTTGAAGAATGAGATCTCGATGTTCTACGATATAGAA  
ACAAAGCTCCTTAAAGAGCTTGGTCTTAAAGTTTGTAGCTTATCTTCCACGCTAAATACTTCAATCCGG  
AATGTTGAAGTTCTTGGTAGTGAATCGTTCTGCATGTAGCCGTGATTGCCGACGGATAAATTCCTTGG  
GAAGTTGGGGGGCTAGATTGCTAGCCACTTCAATGTAATATCCCTAATGCCTGAGCATAACAGACTTTGAG  
TTTTCTAATGCCTGTTTCATTTCAATACGTTCTTGGTATTCAGGAATCCAGGATTTAGAATTTCTTTG  
ATGTTTCTTAGTTCGTAGAAGATCTGGATGATAGTGGTTTGCGAAAATATTCCTTCGGACACTTTTAAAG  
GAAGTTCTTGGATAAGCTCTGTGATAACGTTTTTATGAGAGAGCATAGAGGGGGAGCAATCAAAAACCT  
ATTCCTAAAATTCGGGTAGAGCACAGTTTTGCAAATGTCTGCAATGTGTGTACAAGAGAGCAGCGAG  
TCTCGAAGCGTTCCAATATCTTTCGGAGTAGCCAGACTAGTTGAGATTTTAGTAGCTAGACGTTCTAAGT  
CTCGTACACAGGACAACGACGTTTTAAGATTTTTCGAAGATCTTCTTGCTGTAAGAAAAATTCCTACT  
GTCTGTCTAAGAGTGATTTCTTTTAAATCATAGAAAAGGATGATTAAGGTATTTCTTAATAAACGACCT  
CCCATTTGGGGTGGAGTTTCGTTCCATAACTTGAAGCAAAGATCCCTTTCCATGCTCACCATGAATAGGAG  
ACAGTAGTTCTAGATTTGTTTGGGAAGCTTTATCAATAAGTAAATGTTTCTGTTGTCATAAATTTTTGG  
AATGGAGAGATGGGAAATAGGAAGAAGAAGTTTGTCCCTGAATATAAGACAGTAATGCTCCGGCCGCATTA  
ATAGCAGGGACTAGTCTTGCATCCAAAACCATCTAAAGAGGAAACTTGAAAACACGTATATAATTTCT  
TTGTTGCAGACTGATCTCGAAAGCCCAAGAAACGTATTCGGATAGTGTGATACGTAATGCTGTTGAG  
TTGTTAATAACAGCTGCATTTTTTTGATAAAATTTTGCCTGGCTCAATAACTCTGTAGGAGCCAGCCGA  
CAGATCGCCTCAATAAGGTCCTTGGTATTATCGTATTCAGCAACAAGGAAAGTTCCCTATCGACAAGTCTA  
AACAGGAGAGACCATAGAGAGACCTTACTTGATTGATTGCAAGGACATAGTTATTTGCTTTTTTCTGGGAG  
CAAAGAAGAAGGATAGGAGTGCTCCAGGGTTATCAATCGGTTGATTGTCCGAGGAACGAGGCCCTTTGCTC

CCTTCAGTATTATCGGCCTGCTCAGCAATGGCTACCTTAAAACCGCGGCTTACTAGACGGTCCACAT**ATC**  
**CATCC**AGACAAGTTGCTG**GGAT**GCCGCTCATCGGCAC**ATTC**TGTCCTGTGTAAAGTAATATCTAGATT  
TTGAGCTA**GGAT**CAAAGCATCGTCAAAAAATGCTTCATAAA**ACTC**TCCAAGGC<sup>1</sup>GAAATAACAATAGACAA  
TCACCAGCTTGCTCTTTGCACTGATGCCATTGCTGCATCATTG**GGT**TAGTTTGTGTGTCATAGCTTTAT  
CTAGTATTGCGTGATCGAAAAAATTTTT**ATTC**GTAGTAGGGGAACAGGCTCTTATGTATCAGAGAACCT  
TCGAAACGC**GAGT**GTACAACGGTGT**GAAT**TTTTGGG**GAAT**ACAAGACTTTGGGAAGCAA**ATTC**TTAAG  
AGAAAAAG**GAATCC**ATCAGGGAGAAAGAAGCACAC**ATTC**CCAAGAAAATTATAGTGC<sup>2</sup>GTACCATGGC**GG**  
**ATCC**TTTATCGCCGAAGAGCGGGCATCGCGTGTAAAAAATATTGTACGATGCTTAT**ATTC**AC**GAAT**AGT  
**GGAT**CATAAGAGAAGAGCAACAAGA**GGAT**TGGAGCTAGGCTAGTATGTATTACACAGAAGAGAGCTTAGA  
**ACTC**TAAAACATAGTATTGATATTGTTAGCGTTTTGGGG**GAAT**ACGTACATTTAAAGCGCAGCGGTGCA  
GATTACAAGGCTTGCTGTCCTTTTCATGATGAGAAAACCCGTCATTTATCGTGT**ACCC**AACTAGAGGCC  
ACTACCATTGTTAT**GGAT**GTGGAGAGCATGGCGATGCCATTAATTTTCTTATGAAACAGCAG**GGATATTC**  
TTTTCTGTAAGCGGTACTTTTTCTTAGCGAAAAAGTTTCATGTTGATCTTGTTGTCAGAACTAGAGAGACC  
TCAGGGCAAG**ATTC**TAAAGATAGTCTTCGGCGTATTAACAGAGAAGCTGAAAGGTTTTTTTCAATACTGTT  
TATTACATTTGCCGAAGGGGAAGAGGCTTTAGCCTATTTATATAAGCGA**GGGT**TTTTCTCCCGATACGAT  
AGATCGTTTTT**CAGATT**GGTTATGCTCCTGAGCAAAGATTATTT**ATTC**AAGCGATGGAAGAGCGCAATATT  
TCTGTGAAGCAGCTA**GAGT**GGGCT**GGGT**ATCTCGCTAAAGACTGGTTTTTTGTTGCTCAG**GAAT**CATGT  
TCCCG**ATTC**AAGATGCTTTAGGCTATAACCATT**GGAT**TTTTCTTCTCGGAGGTTCAAAGAAGGTGGGCGTGG  
TGGAAAATATATTA**ATTC**CCCGGAGACCATTTTATTTAAAAAATCTC**GGGT**ATTATAC**GGGT**TACAATTT  
TCTCGTAAGCGCATCGCTAAAGAGCGGA**GAGT**GATTTTAGTTGAAGGTCAGGCAGATTGTTTGC<sup>3</sup>AAATGA  
TTGATTTTGGCTTCAACTGTACTTTGGCTGCTCAAGGGACTTCTTTCACAGAG**ACTC**ATGTGCAT**GAGT**T  
AGTTAAATTAG**GAGT**ATCAAAGCTTATTTATTATTTGATGG**GGAT**GCTGCTGGAGAAAAGCATCGTTA  
CGTGTGG**GGAT**CTTTGT**CAGGCT**GCAG**GGAT**TACTGCTATAGTCTGTCCGCTCCTTCTGGGCAAG**ATC**  
**CGGATTC**TTTTTTAATGCAACGAGGGCCTGAAG**GAGT**TACGAGAGCTTCTCGATAGAGGAGAG**GGAT**TATCT  
TTCTTCTAGTTTGGCATAAG**ATTCATTC**TTATGAACAGTTT**ACTC**CAAGAGAAAAGCTC**GAGT**AATC  
GAAGAGGTA**ATTC**AACAGGTGCGTTGTTGGGGAAGTCCATTACC**ATTCAT****GAGT**ACTTGAGGCAGTTGG  
CTTCTTGGTCAAGGTTCCAGAACCTGCTGTTTTGAGCTATCTTCTTCCATTACGTCTGCTGCTGAAGA  
CAAAGGAAAAAGGCTCCCGCAAAGAACCTTCTCA**GAGT**CTGAGCAAACCTTACAGAAGGAAAAAATT  
TCAAAAAAATTTCTCCGA**GGAT**GATTTTAGAAGCTGACGTGATACGGTGTGTTGTTATTTGCTAAGCCCG  
AAGAT**GAGT**TTGTCCCGCAACGGTAAAGCAGTATCTTCTCCGGA**GAGT**TTCAATTGTGC**GAAT**ATCG  
AGCTATATTTGTTATGGCTAT**GAAT**CACTACAATGATCGGC<sup>4</sup>AAACACTGCCCTCTATGGACGAGATGATG  
TCTTAGTTGTTGGTACTGAAGCAATG**ACTC**TTCTTGTGCCAGAC**GGATGAAT**ACCGA<sup>5</sup>ACTTATGAGAG  
ACATGTGTTCAATCG**ATTC**AGAAATTATTGGACAAACATTGGCGAGACAGAAAGCGTAAGCTATGTCA  
TCAGAC**GGGT**AAAGGTTTAGAT**TC**TTTACAAG**GAGT**ATGTTTCGCTTTCCGGAGAGA**GAGT**TAAGGTTTCT  
TTAGTTTCTTAATTATA**GAAT**CTTAATCAAGTTTTAACAATATTGCTTATTAGTTTCTTTTGTATAGA  
**AT**ATTAGCTCGTTAGTTCTCAATTTATT**GGGT**TTTATGAGAAGTCTTCACTTTTTATTAACAGCATTTAC  
TTTTCTCCTGTTTTGTGGAGCAGCTTTGACC<sup>6</sup>GCTTCATCTCCTAAGACATT**GAGT**TTTGTGCTGCGGAA  
GCTGCTG**GAGT**GGGCGCTGCACGTCTTCTCTGTTGCTTCCCTACTAG**ATTC**TGCCATGAAGTTGCTA  
AAAGTGTG**GGGT**G**GGT**ACGGCTCTGCCTAT**ATTC**TAAATGAACTACAAAATTTACAGAGCCAG**GAAT**T  
AGAA**GGGT****ACTC**GCTTCTCAAGAAAATATTTAGTT**GAGT**TTCAA**GAGT**CTATAGACTGGGAATTTCTTC  
CCGGTTTTTTAATTTAAGCAGCTATTTTTGTTACATTGTGATAGCCTTGATCGCAA**ATTC**TTATTTTA  
GTAGAAGAG**GAGT**TCTCTCATGAG**ATTC**TTGTTAGCTTT**ATTC**TCACTGATACTAGTTCTTCTGCGACT  
GAGGC**ATTC**TCAACAGAG**GGAT**AAGCAGTGTCAACAAGAAGCAGAGGAAGACTGTAGTCAGGTAGCGGACA  
CCTGCGTATTTTACAGCTATGCAGA**GGGT**TTAGAACACGCAAGGGACGAAGGGAA**ACTC**ACCTTAGTAGT  
ATTGTTAGATACTTCT**GGGTATTC**CTTCGAG**ACTC**TTGCTTATGCAGCCCATGCTATGGAAAGTTTCGTTG  
CT**ATCC**ACATTTGCTGATTTTGTGGTTCTTTCTAGGAGGGAAGCAGTTC**ACTGATTTATCC**TCCGGTTC  
CAG**ATCC**TATGGTTGGCGAGATAGCGTTGTTCTTAGAAGCTTTCTCAGATCAAACATTTCCATCACAGCC  
TGTGATTGTTACCTTAGCTATTGGGGCTTCTTCTGCAGAGATCAT**GGAT**ATTACCAGAGATGCCGTCAATA  
AA**ATCC**T**GAAT**TTGTT**GAGT**AGTTAAGTCCACCTTTATAAAAAAAGGCCTTCTCTTGTGAAAAGAGAAG  
GCTTTCTTTTTGTCTGGAAGAACTTGT**ATTC**TTACAGAAC**ATCC**CAAGCATAGAAACCGAAACACTTT  
TGAGCTGCTATCAGCAGAGCAATACGTTGGTTTC**GAGT**GCTTTCATCATCGCTAGCGACACGCACA**GAGT**  
CTAAAAA**GAGT**TCGGTGCTTTGTGCC**ACTC**TTTCAATAGATGTAAGTAGTCTTTCGAGCTTATTGGTAA  
AGCAGTAGTTTCTCTACAAAACG**ATCC**AGAGCCTGTTT**GAAT**AACAAATCTTCGGCAGATTGTAAGGAA



AACATCTGCTCTGTAACGGAGAA**GGAT**AGTGAGGCAA**GAAT**TTTCTTTAGCCTGTTGTGCGTTGCAGCAA  
TGGTTTTTCAGTATCT**GAGTATTC**TTTCAGTTCTT**GGAT**AGACTGAGCACTTT**GAAT**GATAGTTAAA**GGAT**T  
TTTAGGGCAGTTATCTGTAAGGACTGTTGCTATAATCTCTTTATCAA**ATCC**TAGTGA**GGAT**AAGATCGTT  
CTCAACCGTCCCCAAACAAATGTATT**GAGT**TTGCTTAAGACTTCTTCTGGAGACCATACTGTATTAG**GAA**  
**TAGAG**CTCGGAAGTGTC**GAAT**AAGCCGTGCAAATAAATCTTCTATATCTACAGAGCTTT**GAGT**GGTGTA  
GAGAA**GAGT**AA**GGAT**TTCCAAAGACTGGCGTCGTAGGGCATAA**GGAT**CATGAGAGGAGGTGGGGAGAAGC  
CCTA**GAAT**GAAGCAAGAGAGCAGGTTATCT**ATTC**TATCTAAAATAC**TTAATA**AAAGCCCCTGTAGTGGAGA  
TGTTGGAACCTAAAGTAATGTGTTGCAGATGTTCTCCAATAGCTAATGCAGCTGCTCG**GGAT**AGAGAAGC  
ATTTTGTAAAGTAATATCTTCCCATA**ATTC**CCTGTAGTTCTGG**GAATTC**ATTGACAACCGAAGATACAAGA  
TCTGCTTTGCAGTAATGTATAGCGGTATCAAT**ATCC**TCTTTAGCGCATAAGGGGAG**GAGT**GCATAAGCCT  
CTTCTAAGTGTA**ACTTCAA**ACGAGAAGTTTT**ATCC**GCTAAACTACCTAA**GGATTC**AAAATAGGTGACAGA  
TTTAAGTTTTCTCTAC**GAAT**GAGGAAAGAG**GGGT**AAGCAAATCTTGTTT**GAAT**AAGAA**ATTC**CC**ATCC**GTA  
AGTCGTGGAGCTAAAGCTTTTTTCA**TTGCC**CTCAACGATACTGTCTGTAGG**GAAT**TATCACACACGATTA  
A**GAAT**CGATTGGTGATTCTCTCTTGCATATTTTTGTGTTGGGAAGTACCGTTGATGCT**GAAT**CATTT**CAGC**  
TATTAGTAGTTCTTTAGGAAGAGAA**CAAAA**AGCT**GGGT**CAAAT**TGCG**CACTAATAACAAAC**GGAT**GCTCT  
GTAAGGAAGACTGTTTCGTCAACAAGGTGTT**CAGG**AGCAATCGCCACGATTTG**ATCC**CCTGTCAA**ATTCT**  
GCAGCCCTTGTTTAAATGATTGCCCGACGTTCTTTTTTGTGACACGATAACACAAGCAC**TACG**CAACGTATC  
GACATACATGTTGCT**GGATGGGAT**CGTCAATTGACGATTGTCCAGCTGACGATGTCCCCAAGAA**GATTG**  
CCTGATGATAC**GAATCC**TAAAGATATAGGG**GAAT**TTG**ATCC**CCATATAGCGCAACCAAC**CAGC****GAAT**AG  
GGCGAGCAT**ATTC**CACGCCACCATT**ATCC**CAGGTCATTTTTTGGGGAAAC**GGATGGAT**CGA**AT**CAATTG  
AGGGAGCTCATTAA**CAAG**AATAGCTGCAGTTTCTT**TGCG**TTCTTCTG**GAAT**AACAAGAAATAGGTAA**TCG**  
GTACCATTGATAGAACGAACACGACAAATCGCAGAAGGTTG**ATCC**AAAGCACTTCGGTGAGAGATCGATA  
**ATCC**ATGTGAGGGGAA**GAAT**TGTTCTCCTTGAGGAGACACGGAGCCATCTGTCATAAATAATAAGAAAG  
AGGGGGCCCTTTTTTCTCAG**ATTC**CGGAC**GAAT**CGTTACATGACTAAGACCTTCTATGCACAATGCCAAT  
CGTCGTG**GAGT**GCCTAATACTTCGAGATGTTTGTAA**GCAAT**GCCATGGT**CGG**CAAG**GAGT**TTCTTTGCGA  
GCG**ATTTCGAGT**TGTT**GAATTC**CAGTAGGGACAAAGGTCGCTGGCA**ACTC**CTCGCTTCCAATTT**CGAG**CG  
AAAGCTTCTGCTGGCAAATTTGTTG**GGAT**TTTTCTTTGGTGTACTGTTGGTGTGGAAGGAG**GAGT**TTTTA  
AGGAGAGGAA**ACCC**TAAT**ACTC**CCGCCATGCCACATACTTATCTGCAGCAGCTCGTGCTAGTTGCCGTA  
TCTTGCAATATACCGCGTGCCTTCTGTACAGAAAT**ATCC**CTCGG**GAAT**CTAGCATATTAAGGCATG  
GGAAGCTTTGATGACGAAATCATATGCTGGGAGAGGGAGGCCCTTGGTCTAG**AGT**TGCCAACGCTTCTGCA  
GAGAAGTCATCAAAATGTTTTAACCACATGGTAGTGTGGCAGTCTCAA**AAAT**TGTATTGGCTCCAGGCCCT  
GTTCTGCATACTGTGTGATGTCTCCATAAGTAAGAGAACC**ATTC**CACATCACATCGTAGACG**GAGT**TCTT  
TTTTCTGAAGATACATAGCG**ATTC**GCTCAACACCATAAGTAATTT**CGCC**GCTAAT**TGCAT**CTAAAGGTTTTA  
CTTCTACAGCTTGGAA**AGT**AGGTCAGTTGTGTAATTTCCATA**CCATTTA**ACCATACTTCCAGCCTAGCC  
CCCAAGCTCCAATAGTA**GGAT**TTTCCAGTCATCGTGAACGAAAC**GGAT**GT**CATGAT**CTACTAAATTTAA  
**TCC**GATGACTTTGAGAG**ATTC**TAAGTAAAGGGAAAGAAAATTTTCAGGGACAGGTTT**GAGGAT**CACCTGT  
AACTGGTGGTACTTTTGTAA**TCGATTA****GGGT**GTTGTCCATAACGACCGTCTTGC**GGG**CGCCGAGAAGGTT  
CGATATAAGCTGTTCTAAAGGTT**CGGG**CC**TAAAGAT**TGCAGAAAGGTTGCT**GGGT**TAAATGTCCCGGC  
TCCA**ACTTCT**AAATCAT**ATCC**TTGAT**GAAT**GATGCAGCCTTGTTCGCTCCAAAAGTT**TAGAAT**AGCTGCC  
ATCATGGCTTGAA**GAGT**TAAAGGTTGTGAGGACATA**AAA****ACTC**CTAGATATCTGAGAAAAGAAGAGCCT  
TACGGACACG**GAAT**ACGGCTTGAAATAGGAGCCGGGCTCTGCAGAA**CAAGGAT**TAAGAA**ATCC**TTGAT**AT**  
**TC**CTAGAGGAACATACTAGTGGAAGCTGTATTAAT**TGAACA**AGGCGAGAAATGCCCTGTTTATAAGAGAA  
ATCGATATTGCAATAGAGAGAACTAGTGCTAAGTTTTTTGAAAA**GGAT**TTA**GAAT**GTATTT**ATTC**CAA  
TATAGATGGGAAAGACTGGCGATAA**ATTC**TAGAAATGCTAA**GAAT**GAGAGAACTAAGAAAGTGAGCAGTC  
ACGAGAG**GGAT**TTTTGCGGTTTTTACAGAGAGGAGGAGCC**GGAT**AGATCATAACATGTGGTGCTGACTTT  
TTCAAAAGAAAATATCTGGTGTGAAGCACTAGACTTGG**GAATTC**AAAAAGATTTCTTGGGGAA**CAGAT**  
GAG**GAGT**AAGCTTACCAA**ACTTCC**TGACAGTTTTTTCGTCTATTTATCACACCGATTTTTATG**ATTC**TTTAC  
TTAAAAGGTCGGTGGTTC**GGGT**TGCTGCGC**ATTC**CTGCCTTATGTTCTCCTCTTTTTGCTGATCATT  
CGGAAATCAC**GGAT**GCTGTAGAT**GGAT**ATATTGCGAGAAAGTTTTCCAGGTAACAGATCTGGGAA**ACT**  
TCTAG**ATCC**CATGGCTGATAGTGTATACCGTATTT**CGCTGT**ACCTCACGTTCACACA**ACCC**CCCGT**GAAT**  
CTTCTCTCATACTTGTGTTTTATTTTCTTAGCTCGAG**ATTC**CGTTATTAGCACTTTGCGTACGCTGTGCG  
CTAGTAGGGGACAAGTATTAGCTGCTA**GGATGAGT**GGGAAGTTAAAAGCT**ATTC**TTCAAGCTATTAGCTT  
CTTTTT**CATCAT**TTTTCTCGATGTTCTTTGTGCAAAAGGCATTATCTCCACAGACGATTTA**GAGT**TTTTTC

TCAACAGTGATAGTGTCTTTAGTAGCCTTTTATTCATATTTGCTCTGGAGTTGAGTATATTTGGGTGAATA  
AAAGTCACTTATTACAGAAAAATGACTCGCCGGATGGCAGTGCATAGGGAAGTTTATTGTTTATAAATTT  
CTAAATATTTATTGGCGGCAGTTTCTAGGTCTGAAGAAAAATTTAGACAAGCACGTACAATATGTTGCCA  
CTTGTCATGGTTGGTACGGTAGGTTGTCACTGCTTCCAAAAGCATGTTTCGGAATTCATAGAAGTCATGC  
GGATTAAGAAGGAAAATCCATTGATTCATTTGCTACAGTATCTGCTAGTCCCTCCTGTAGCTCTTACTA  
ACGGTACAGTCCCCTAACGCATTCATTCATTTGTTGTGAGCCACATGGTTCAAACATAGAAGGAATGCA  
GATCATATCTGCAGCGGCCAAAATTTGTCGTGCCAGCACATCACTATAAGTCAAAAATCCTTACATTA  
GGGGAATTCGCTAATGATTCATTGAAGATTTGCAAATTCATTCATGCAATTGATTCCTCGTAGCAGGTACCTA  
TAATAATGAGCGTGTAAAGCGTTTTCTAGTGCATGGAGAATGGCCTGTTTCATAAAGTGAGGACCTTTCTG  
CTCAGCAATTCAGAAATAATGCACACGCAAGGAGAGTGTCTAAAGAGAGGCCTAATCTTTCTGTACAAG  
GCTTTTTTATTCCTCGGCTTTAGCTTCAAAAAAATTTGAAGGGGTCTCGAAAAGCTCTTTAGTGTAGTTTT  
TCGCTAAATTTGGATCCGTTTCAGGCCCCCAAATTTGTCGTGTCGATTCATTCAAAATCCCGGGAGATG  
ATGTTGTCTAGCAGTAATGGCATCGTGAATTTGTAATCGGAATAATCTTCAAATTTCTTTGGCGTAT  
GTAGGAGAAACCGTAGTCACGAAATCTGAACAGTATAAAGCTCCTTTTAGCAACACACAAGTTTGTGGAT  
CGCGAAATAGTTGGTACTGGCTGATATAAAATTCATTCAAAGAGGAGGCTTCTAATATTTCTCGTGTGTG  
ATAGCCTCGATAACCAAAATTTATGTAAGGTAAGAACAATCTTTTGTAAATGAGAGCAGGGCTGTTGTTG  
AGTAGTCCAGCAACTAATCCGTGTATGCCAATCGTGTAAATGAACGATATTGGCTCCTTCTTTTTGGATGT  
AGGAGGCCGAGCAGCAGAAAAAGCGCAAAAACGGAAGGCATCATCGCTTGTGTAGATTGTTCCGCATT  
CTCGAATAACTCTGGCTGTGTGTCGAGTTTGAATAAGAGTTACTTTAATTCCTTCATAAAAGTAGGAGAAA  
GCAGTTGCTTCTGCTCTCCAGCAAAAAAATAAGATAATTTTTGAATCGAGCAAAGATCTTGTCTTTTGG  
GCAAAGTAAATAATTTAGGGTATAAAGGGATTACCACCTCCGTGTGTGATTAGCGGCTAAAGCTTTTGC  
TAGTCCGTATAGCGCTCTCCAGGCCCTCCGGCTTTGATTACCGGAGCAAATTCGATAGCTGTGTGAATA  
ATTTTCATTAGCAAGCTTTTTCGTTTCGTTAATTAATAAAACTCTGTTAATTATTTCTTTTAACAAAAATA  
ATCAAGATGTTTTTGTATATTTAATTAATTAATTTTATTTAATGGATAGTTTTCTGCTCATAGAAGGTTGTTGT  
GGTGGTAAGATGCCCTTAAATGTAAAAAATTTGATTTTTTGAGAAATTTCTCTACCGATAAAAAGGTCT  
TGTGAGGTACACTCGGCTCTTCCATTGGGGTGTGGCCAAGCGGTAAGGCAGCGTTTTTGGTACCGCGC  
ATCGGAGGTTTGAATCCCTCCACCCAGAGTTGCTTTTTATTCCTTCTAGGCTGTTTAAATGCGAATC  
TCTTATTGAATAGGAGAGATTTTCGATTGGGGCTATCTAAGGGAACAGAAGGCTTGATAATAATCAGAGG  
CTGCAAGTACCATGGTAGGCGCTTGTCTGGAGGGGATTTCTTCGTATGTGCCATTTAAGGCCGTCTGGT  
ATAGCGCGTAGGACCGTTTATCCGGTTGAGGGAAAAGAAGCCCTAAGGCCATTCAAAGGCCCTTTAGCT  
CAAGGTAATGGAGAATAGCATTTTATGGAATCTGTAGTTCAAAGTCGTGAGACTGATAAGAAGTCTGTTA  
TTAAGAAAATTCCTCAGCAAGGTGGAATTCCTGCTGTTCTTTATTCCTGGGGGAAAAGCTTAGCTAATAT  
CGTTGTAGATGCGCGAGTTTTTCAGTAAGTTTTCTTCTACTTTTGAAAGCGGGGCTTTAGCTTCTACTGTG  
TTCACGCTTTCTTATGAAGGACGAGAAATCAAAGCTTTAGTCAAAGATATTCAGTACCATGTAACGACTT  
ATGATGTAATTCATCTCGATTTTGAAATAGTGGATGGTTCGCGACGTTCCGGTTGAATGTTCTATTCG  
TTGCATCAACACGGTAGATTGTGTTGGGTAATAATAGGAGGATCTTTAAGACAAGTGAATTCGTTGCATC  
CGAGTTGTTTGTAAAGCCAAAAGATATGTTCCATTTTGGAGTGGATGTTTCAGTCCCTAGGGCTTTCTC  
AAACCCTAAACTATCGGATATTTGTATTCCTGAAGGAATAGACCCTGCACTTCTCTTAAAGAAGTTGC  
TGTAACGGTAGCACGACGATAAGATTATCATGGTAAAGCTAGTTGTTGGCATAGGAAATCCCTGGACGACA  
GTATGTCTGGACAAGGCATAACATAGTTTTCTTTTGTGGACTCGCTAGCATCACGTTTTTTAGGGGCT  
TTTTCGTGAGGCCCCACGCTTTTATGCTTCGTTTTCGAAGGTAGAAAATTTCAAGCGAGGCAGTTGTTCTTA  
TGAAGCCCACCACTTATGTCAATCTTACTGGTAAAGCTGTCTTAGCTGCCAAGAAGTTTTTTCGATGTTTC  
CATGGAAGATATTCCTGTTGTAGCAGACGACATCAATCGGGAATTCGGTTTTGTGCGTTTTTCGGCAAGAT  
TGTGGCTCTGGTGGGCACAATGGAATTAAGAATACCACGCAGATTCGCAATCCAAATCATTATGGAAC  
TACGCTTGGGGTAGGAAGGCCTTCGTATCCCTGGAGCTGAAGGGGTGCTGATTATGTATTATCTAGTTT  
TTCTTTGAATGAAAAAGAAAAATTAATGACTTTTTAGAAAAAGGGATAGAAGAAATCCCTTCTTGGCTA  
GGTTGTTAGTCTGACGGGATTTACTGTTCACTTTTTGAAAAAAGTTCTGAAAAATAATCAGTTTCGA  
TAACATGGAAGCGCTTCTTATAAGAGTACTATCTCTAGTTATTGGAAGAAGCAAGGTCAATGCTTAGGAG  
TTTTTAATGAAAAAAGAACAGGCCAATTTATGAGGGAGCCTATGTTTTTAGCGTGACGTTAAGTGAAG  
ACGCTAGACGTAAGGCTTTAGAAAAAGTTACTTCTGGATCACCATTATGGTGGCGAAGTTCTGAAAAT  
TCATGATCAGGGGCGCAAAAAGTTAGCTTACACAATTCGTGGTGCTAGAGAAGGCTATTACTACTTTATT  
TATTTACAGTAGCCCCAGAAGCTATCGCAGAATGTTGGAGAGAGTATCATTTAAACGAAGATCTTCTTC  
GATTCATGACTCTTAAAGCAAGCGCTGTGAAAGAAGTTTTAGAAATTCGCTACATTGCCAATGAATAATAGTT

AAGGAGAACGTATGAATAGACCTGTTTCATAATGAACACAGAAGGAAGCGTTTCGCTAAGAAATGTCCTTT  
TGTTTCCGC GGGT TGGAGACCATCGATTACAAGGACGTTACC ACTC TAAAAAGGTTTATTACGGAAAGA  
GGAAAGATTC TTCCAAGAA GGAT TACAG GGGT TTCTTCTCGCTCCAAGCGCTGCTTGCTCAAGCTGTTA  
AGAGAGCTCGACATGTAGGGCTTTTGCCTTTCTGCTAGGAGAAGATTAACCTTAAAGGAA GAATAAC GGATG  
AAACCACAATTACTTTTATTAGA GGAT GTCGATGGCTTAGGGCGTTCCGGCGATCTTGTTGTCGCTAAGC  
CC GGAT ACGTTAGAACTACCTGCTCCCTAAAGGGAAGGCAGTGGTTGCTAGCGCTGGA ACTC TCCGTTT  
GCAAGCAAAGTTGCAAGAGCAGCGTTTGGCTGCAAGCTGCGGCCGATAAAGAA GAGT CTCTTCGTTTGGCA  
GAGATGCTTAGAAGCATCGTTTT GGAT TTCCAAGTTCGTGTAG ATTC TGAGAAT AATATGTACGGTTCCG  
TAACCGT GAAT GATATGATTAGTGCTGCTGAGCAACAAGGTGTTGTTCTTACACGTAA GAAT TTCCCTCG  
CTCTCATAGCGGTATTAA GAAT CTGGAAGACACGTAGTTGGACTGAAATTAAGAAAGGGCGTGACTGCG  
GAT CTTCATTTGGAAGTTCGTGCTGATCACGAAATCATTGAAACAAAAGA ACTC CAAAGCGCAGAAGAAC  
AAGAAGGTTAAACTTTTTGTTTGTGGGGGAAGAG ATTC TTTTCTCCCCACCTCTTTTTTTTTATTTTTT  
AATTATGCACTTTCTTTCTCCAGCAAAGCTTAATCTTTTTTGCAGATACTTGGCAGGCGGGAAAGATGAT  
TTTTCATGAAATAGTCACACGCTATCAAGCGATAGCCTTTGG GGAT CA ACTC TCCTTATCAATAAGCTCTC  
GCG ATTC TCTCCAAGTAATTAATGCTTGTCTATCTTGAACGCCTAGTA ATTC TATATGGAAAAGTGTGGC  
GCTTTTCCGTCGGTACACAGGCATTACAACGCCTGTTAGTTGGCGTGTAGTCAAACAG ATCC CTGTTGGA  
GCAGGTCTTGCAGGAGG GAGT AGTAATGCAGCAACTGCATTGTTTGC TTTAAACCAAATCTTCAAACAG  
GACTATCTGATGAGGAAATGCGTTCCTTAGCCGAACAGATTGGCAT GGATACTC CTTTTTTCTTTTCTAC  
AGGAGCAGCCTTAG GAGT GGGCCGTGGGGAGAAAAATAATAGCTCTAGAAGAGAGT GTTTCAGATAGATAT  
GTTTTGTATTTTTCTAGTGAAG GAGT TCTCACTAGTCGGGCTTTTGCCTCGTACAACCTTCGGACTGTT  
CCTCCAGAAAAAATTTA GAGT ATACGCAAATGACTTAGAAAAGCCTGTTTTTTCGGTTGCGCTTAGATTT  
GAAAAGAAAGAAACATTTGGCTAGAAAAGCCTGTGGGCGGAACCTTCTGTGCATATAGGGCTAACG GGAT CA  
GGGGCAACCTTATTTGTCCGTT ACCC AGAAATCTTAGAGGAAG ACCC TTCTTATGCAGCTCAGATACAAA  
GAGCAGTAACGTTAAGCGGAGGAT TATTGACTTCTCCGATACGAAGAG ATCC TACAGCTTGGTATAGCAT  
CT ATTC TGAAGTGCACCTGCAGCTACATAAGATA ACTC TGCAAGGAGCTTCTTT ATCC GGAGCTTTAGAA  
ATAGTAACTGTCTATTGG ACTC AGAAT CTTTGAAGCAGAAA GAAT GCTTGATGACGCAGCAACA ACTC  
GATCC ATCATAGAAGCAAGCTTATCATTATCGTTCTCTAAAGACAGCATAAATTGTGTGTTGCAT ATTC CA  
GCTCCTTATAAA ATCC TGCCTGTTGT ATCC CTAGTACAAAATACTTGATTTTTTTTCGATAGAAAAAAAC  
AGCTCTGCCCCCTACAGAGCCCTTTTAAAGGGGGACAAAATACTTCTTTTTTGTAGCGGAACAAGCAAA  
ACATAAACGGTGGAACAGCTCTAAAGAGCCAAAATAT ACTC AGAGATACAAGAGAAGGTAACAATGCTGA  
TAAAAATAATTTAATTAAGAGATGTCA GAGT GCGGGAAAGTTGGTCGCAGAAT AAGGT ATCC AACAATA  
TTGGGCATATTAGACACTAAAGTGAGCCCTCCTGCAGACATACTCCAACCAAACAGGTAAAGATAAC  
AATCATTTGCCATAGGTAAATTGTGAACGATATG ATTC ACCAGAGCATTGTCTAAGAAGATTGAAAACAT  
ATATGAGGTATCATATAGCCTAAATCTGACATGCCGTGCATGAGCTCAAGC ATCC ACC ATTC CTGAAGT  
TCTCCAAATATCACT ACTC CAACATAGAACA ATCC TACGAAACAGACTTTTGTGTTTGTGATA GGAT GTT  
GGTAAAAAATCGT GAAT CGTGA AA ACCC TAAGTAGAAAATAAATAAAA ATCC TAAAAATAAGG GGAT TGC  
GCGGCTGA GAAT CACACAACCAACAAGAACAACAT GAAT GAAAATA ATCC ACGAAGGAAGGCGATC ATTC  
ATCATAGTTGTACTGG GGAT GGTTTTAGGGAAC TTTTAAATTC TTTTCGGAAT AACAGAAAAAAATTG  
TTGTAGAAACCA GAAT AGCAAGAAT TACTTTCCAACAAAATGACTGATAATGAAGCTGTTTGTCCATTT  
AATTTCTGGAA GAAT TAGTCAGTAAAGCTCTTGAAGAAAATGAAGAAGTTAAACCGCTGATCGAAATATTG  
GAAAATAATAATCC CATAGTTGCATAGCAAACCTTGGGAGAAGGAGA GAAT TTGTAAAATGTTTAGACA  
ATAGTGTAGCTGCAATAATCATCGCTCC GGATTC TTTAAGGAAAAAAGC GGAT AGCGGTGCTGCAATCAT  
AATAGTCCACCACCAACAATGGG GGAT TGTTTTCCCTATTTTTTGCATCGTTGCAAAG ACTC TCTGAGAA  
AAGT ATTC GATAGGTCGCG ATTC AAGGAGAAT CAGCATAGCGATAATAAAAAGGGAGAAGACATAGTTTC  
GGCTATCGAAATAGGCCATGGTTATGCGATAGCCTTCTGTATATAAAAATAGACA GAAT TAGCG GAAT CGC  
CCAAAGAACGAAGACCAGTTCAACGCGACTAACGATGCGCAGAAGCTCACTTAACCAAAGGTACTGACGC  
CAGCGTTCTGGAAAAATCATCTTTTATGCTGAG ACTC TTCGTATAATCGTGTTAACCATGGTGTAAAGAA  
AGGTAT GAAT CACCGCAGAAAAAATA GAAT CGCTG ACCCGATGCGTA ATCC TGAG GAGT AATG GGGT AA  
AATCATAGAA ACTC ACAAGATAGAGGGCTATCGTCTTTATCACACTAGAGGGAGGCTTGTTATTAAAGGG  
TAATAGCTAGCTCACTC CTAGCTCTCTATCACTATTTT GGAT GCACATAAAGAAGCAAGAGGTTTTTCTC  
GGAT GAAGAACCTCTT ATCC GAGAAAATGTAAGTACAAGAAT GTTATTTTTTCTGCGACGAGT TGGCTC  
CATAGACGAGGAGT TGGAT TTTCTGGGCCAAACTTTT GACTC AAAAAATTC TTTACAGTACTTTTTTGAATA  
GCTGTA ATCC ATAGAACGGGCAGCAGCTATTTTTTGGTCTGGGCGAGAAAA ATCC TGTTTTTTTCGTTTCA

AAAGCTATAGAGAAT AATTTTTTCGCCATAGCTAAAGGTGTGGAAC TTGGAAGCAATATGGACTGGATAT  
ATGTTTCTCGAAGCTGTTCAAAGATCTCTTCGGACAAGCCTGCAGATTC TGGAT CAGTAGCAATCTTTTG  
TATAAA GAGTTGTGTTCTATGCACAAGCTCCTCAGGA GAATAGTTATTGGATC GAATATAGAAAAGTCCA  
CAAG GAGTTTCTGC GAATTC CAGATATTTAGAACCTACCATAT ACCCAAGTTGTTGCTCTGTACGTAAAT  
CAGAGAAGTACAAGTTATGGATCC AAGATAACAACATACTAGTAGCTACAGAGT CTTATATTGATGGG  
ATCTTCGTTTTGTTGAGCAGCAGCATAACCATTCCAGAGAGA GGATATTGGAACGAAAGCTTTGTAGAA  
GAGAGAGTTTTCTTTGA GGATAATAGCTAGGAGCAGCATAAGGAGACGAAGCTTCTGCAAAGTTAGAGA  
GAGT CGATAATAAATTTGGAGAGATCTTGAGCCGAGAGCGTTCTTAGTGCTAAAGATTC TACAGCTAGTTC  
TTGGAGTAGTTTATTC GTGAAGTTCGCAA ACTCTTCGTAGGAGAGA GGGT GTTTAAAGTATTGAGCTTATCT  
TCTAAGGAAACGGTATCAACAA GAATCTGAGAGT ATAGTTTATTGAGACCAGCTCTTATAGGGCAGGCAA  
TAAGATTC TTCTGATATTGTTCTGATAGCTGATCTTTGTAATATAGAAACAGACTTTCTCCACAGGAAG  
ATCTCGTAAAGAAGACAGTAAAGCATTGATAAGAACAGGAGAGGTCTCAGTATATCC TAAAAGAGAAAAGA  
TCAA ACTC CTGTGCTCCAGGAGATACTGCAAAAAGTC ATTC CAGCTTTTAAAGCATCGTCATAACGTTTTTA  
TTAATGTTTTCATTAGCTAGTAGACTATATAGGTCTCGTAATACTAAAGAACGCACATCTGTTCTGTT GAAT  
TTGAGGAGAAC GGAT GCGCAACTC CATAGCTATTTTAG GAATCGTATAGAAA GAGTCTT CACAAGTATAT  
AAAGTGATCGCATTTTGATCATAGGT CAGCTGCGGAGAAAAAGCAA ACCCTTCGTGTTGTTTTCTTTTGAG  
ATAATAATTGGACTGTTTGAG GAATAAATTTATTG GGATTTGGAAAAGCAAATCC TAAGGAGGAG GAGTC  
CTGTATAGGTGTGAAATCTAAGGGTTTTTCATAGAAAAGTGTGCTCAAAGATGGGAT CATAGAATTC ATCT  
GCATTC TCCCAAGA ACTC GGTAGGGT TAGCAGATAAGATATAACGTGCCTGTTGAGGGTCTGCTAAAAATG  
TAGCAAAGGTTTTGTTTCTCTTGG GAGTATTC TGGATAGACAAGAGAGCGATAA GGGTATGTTGCTAA  
TGGTT CAGAAGTAAAATTTGGGGACC ATTCGTGATAGTGTGCGA GAATAACTC GGGTTGCGTGCTGTAAGTA  
TATTC TAAA GAGT TGATTTTTCTGTATCTCTGGCAAG GAGTAGGCAGGAAGTCGTT CATGACGAACATAAT  
CAAGAAAAGCAAAGTTAGCTGCAAAA ACTCTTTGAT ATTC GCGTTCCCTTATTGGT GAGT TTATAAG  
AAT TTTCAAATCTTGTGATTATGAGAAGTGTGTAAGTTCTGCTTCCATCTCAGTAATGAGCTGTTCT  
TTTTT GAGTAAAGCAACAAGACTATTTTTCTTTTCACTAGATAAAAATAGAAATCAGTGACTGAGCCC ATC  
CTTGTAAGGACTGTGGAGCATCATAAAAATGCCAGTAAATAGCTAGTTGTGGAGAAGGTTTCGACAGCCTT  
ATTGATGAACAGTTTATTAAGAGCAGTAGTATCTTGTGTCTTTGGAAACGGTTTTTGTGGTGTGTACTGT  
GCAGATATAGGGAT TTCAGAGAAT AGGGACGCGATATACGGCACTGCGGTGTTCCAACGGAGCTGTAGTGT  
AAACAATTGCTGCCATATTTTCTGGA GAGTAGT GAGTGGCAAACCATGTTTGCATATCTTGAGT AGTGAC  
GGAGTTGAGGGT AGAGAGATTGCCGAGCCAAAGCGTTTTTAAT GGGT GATTTTTTAGGAGCTATAAGTTGT  
TGAATACGATGCATACGACGAGAAT CTTTAGTT GGATGCATCGCAA ATTC TTGCTCAACAGCATGAACTT  
CTTTGTTTTAAATCTTCTTGGCGGAAGAGAGGTT GGATAAAGAGATGTACAAACTG ATCCAGAGCATTATC  
TAAATCTGCATTGTTACGGA GAATAGGAAGCAGGTTTTTATCT GGGT AAGTAAATGCGTTATAGAT ACCC  
CCATGTGTCTTAGGAAGGCAGGAA ATCC TGAGGGCTCG GGATATTTTTCT ATTC CCGAGGAACACACAGT  
GTTCTGTAAAATGGGCTAAGCCTGG GAATTC GACA GGATCTGCATTATTTCTGTTTTGACAACATAAAGC  
GGCTCCGG ACTC AGCAGCATGAGGGGAGGATACAATCATGAGAGA GAGTCCGTTAGGGCATA GAATTTTA  
GCAATTTTTTGATCTGCTAATGCAG GGGTCAAATAGTCAAAGGGT TTTTCTCTC GAATCGTTTTGAAAGG  
ATTCGAGCAAGCAGTTAGAAAAGAAG GAATGCAAAGAAGTAATAG GGATAGGGAACGTT CATATTTTT  
GGGT CATTGGTA GGGT CATTGATAACAGGAAGGTGTTGTCCATTTATTTGCAACCACC GGGT TGAGG  
CTTTTATCAAAGGCCAGG GGGTTCGTCAAGTTA GAATTTCTTTGTAGAGATCGGTCACGATAGAGAAGG  
CACGAGAGGCTCTTAAAGCACGTAGGGCGTGTATATCATATAT ATCC GCTTCTTCGGAAGAACAAGCTC  
ATCGAGCAACAGTTCGTCTCCAAAGTTAAAAGCAACGGGGCAAATGAGATCACGCGATGTTCTCCGATC  
GCTTCTCTATTGTGCGAGGCGGAGGAA GAATATCATAGGTTTTTATTGCTAAAGGGAAGAAAT GAGTCG  
TTTTCCCGAGCTTTTGGCAAGGAGGCGGAACATCTCTACACTGTCA GGATGAAATTC TGCA GGGTACAA  
TTC TCTTGAAGATTTTTACGATCTCTTCTCCGGAAGGAGCAACATAAAA GAATTTCCCTCCTTCGCTA  
AGAAGCATTTTTAATGTTCTCATGCTTTTTTGGTTATGCATGAGCTTTTCTTCTTTCAGTTCTGGAGGGT  
GATTGATGTGTCTTTTT GAATAAATACACAGAAGATCGC ATCC CATGCTAAAAGGTCGCGCTAGAGGATC  
TGAAGTGATCCGATCC CCTGCAACAAAGATCATGCTTTCCAT GAGT TGC GGATGGGAGGCTCC GAGTAA  
CAGTACATGAGCTGG GGGTCTGATTC TGTCTGGTGGTTAGCTAACAGCACCAGTTGTGTCCAGCTT GGA  
TATATTC TTGAATCTGATCCAATCGCTCA GGATGTAGAATTTGTGATTTTTGGTTCGTAATCAGCGCAGA  
AAAAAAGTGCATGCCAAATTTGGTAAAGATCAATTTGGCGAGC GAATTTTTTTGTGGTAGGGAGGGAAAATA  
ATAGGATTC TTAAGGTCATCAATAATGACCTTAAAGCCATTGAGAACAAGAGCTTCCGTTTTCTCAGCGG  
AGCATTTTTTAGATGCAGCCTCGATGTAGGTTTTGATAGCAAATTTGAAACTTTTTGGTACAAAGGCTCTGG

TAAAAGCTGATCTTCAAAGCCTGATATAAACAGTTTGAAAAATGCATCAACACACCTATTTATAACTCA  
ATTCCTTCTCCTGTAATCAATGAGAAAAATTGGTAGTGGTTAAGATGGATAGAATCGGACGTATTGATTT  
GTAGCTTAGCTTTCAATTGCTTAGCCAAGCGAATGAGTTCGACATCGTCCTGCTCTTGTTTCATATAGTG  
GGCGATTTCCGGATGAACGACCAAACACAAGTTCGTGTGCTCTTTGTGTTAATAATTTTCTTCAGGTCA  
CGCTCAATTTCTATGAGGATACTTTCAGAGGTTTGTATGATCGCGTTCACATTACAATATGGACAGGTGG  
TAAATAGGGTCTGCATTAGTGACTCAGGATTTCTCTGGCGAGTCACTTCTACTAGCCAAATTCACATCAT  
GCTCAAGATTGTACAGCGCGCAGCATCATATTTTCATGTGCTCTTTAATCTTTCCAAAACACGACGCTGA  
TTCCTTGCCTGATTTCATATCGATAAAATCTATGATCACAAGTCCGCCAATATTTCTTAGACGCAGTTGTC  
TAGCAATTTCTTCTGCGGCTTCTAAGTTAATTTGCACTAGAGTCTCTTCGACTCATTTCAGCTGTGT  
GCTACGTCCAGAGTTCACATCGATCGTGTGCATAGCTTCTGTTTGTCAAAGAAGAGATATCCGCCGCTA  
GACAGCCAGATTTTCTCTTGGTAGCGGATCGATTTCTTCTCAATATTAAGCGTTCGAACATTGGAA  
CCGAATCGCGATAATACTCAATCTTACCCTGCTGTCTGGAGAATATTTACCCATAAGCGTTTGCATTT  
TTGATAGGTCGCGTAATCGTCTATTAACAAACGCTTGTAGCTCTTATCTACACAAGTTCATCACAGCTTTT  
TTCAGAATATCTGTCTTTCGTAGAGAAGAGAAAGGATGATCTGGAAGAATAAAATTTCTCTAGGATACTTT  
GCCAAGTATTCAGAGATCCTGAGCCTCGTTAATTAGAGTCTCTGTTGAAGCGGAGATACTCGCAGTCCG  
ACAGATAAGACCCATATTTTGGGGCATTTCAAAAGAGCGAATTAACGTGTTGAGTTGATCTCGCATCAGA  
GGGTCTTCAATCTTACGAGAAACACCTCGGTGAGGGGAATTCGGTAGAAGGACTAAGTAGCGTCCAGGGA  
TTGAAATATTAGAAGTGAAGTTCGAGCTCCTTTCGTCCCTATAGGTTCTTCACTACCTGAACAAGTACGGG  
ACTGTCAAGTTTGAAGTCTTCTATAGGAGCTTCGGAGGTTCTTCTGGCCGGGTTCTGCGTGATCT  
GCATCAGAATCTATATCGAACATCTGTTTGAATTTTTAGAATTCCTAATACGTCCGAGATATGAATAA  
AGCCATTCCTCCGCTCATCTATGTTAATGAAAGCGGATGAATGTTTCGTAAAATGTTAGTTACGCGACC  
TCTATATATGTTCCCTTTTAACTGGCGAATTTTTTTCTTTCATGATCAAATCAAACAATTGGCCATTT  
TTTTAAATGCGCGTAACGAATCTCTTTAGACTCTATATTTAGTAAGATATCGTTTCCATGGCGTTCCTAA  
ATGCTCTGCGCTCTACAGGAGTCTCACCTGATTCGAGGATGGGAGTTATTTTAAAATTTATTAAGCA  
GAAGGCAGGATATAAGTCGATTAGGTAATAAATTCACAAAATGCTTGTGTTGAATAGTTAATTTAG  
AAACTGATTTGTTTCTTTTATTGTGATTTCTATAGTGACAACGTCCAATTCCTTATTCCTTGTGGCAATCC  
GCTTTCCTTGTGTTTCTGTTGCTCAGCGACAGGATAGAAGGCTGTTCCCTATGCTGCAAACACTTTTTTT  
AAAACTTATTTTTCATAACCCCTATTTTTGTCTAGAAGCAACCTATTTGTTAGGGGAAGTATGGGAAAA  
CCTTTTGTATCGATAAGAGTTTCGCGGTAAGATATTTGGAAAGAATATAATTTAAGAATGAAAGTTGAAA  
GACGCGGAAGGCTAATTGAGAAAAGACGATAACGTGAAATTTTATCTTCATCGATTAAAATTTCCAGGGG  
ATAGAGAAGATATTCATGCTTCGATCCACCTCAGGTATTTTGGCATTCGGAAGAAGAGGGTATGTGTTT  
CCCTGTGGAAATTCGGGGAGTCTAGAAATGGTAAGTGGAGAGCAGTGGTTTTTGTCCCTAGAAAATTTCT  
ACGATACTTTCTCTCGTGTAGGATTTGTGATGCTCCTGTTGAATGGCCAGTACAGGGCATCGTGATTC  
AACAAATTAATTCATGTTTCAGATGAGAGATCGGGGTTGTTGATGCGGTGATTTGATTCGGATGAGTT  
ATGTTAGAGGGGGATCGTTTTTCAGGAGTGCAGGAAGGAGGATGTCCTGCAAGAAGTATTCAAAAAC  
TTTTTGAAAAAAGGCGGGACGTAATCTTTAGAGAGAGAAAAAACCTTCGACTTCCAAAAACCTTT  
TTCTCTAATACTTTCGTGTTTCGCCGGGAGAAAGATAGAGAGCGAGTCTTCCCTGGTATCGTTTTCACTG  
CGAAGAGAGGGGGTGTCCCTGTCTGTCGCGGTATATTTGGGGAGTCTTCCACAAAATGCATCGCTTT  
TTGAATCCGATGGGATCCAGACTTCCCTATTGGGGAGGGTAGCTATCTGCAGTCTATAGGAGAAGTTAG  
GAATGGCAGTACCACGTAATCGTCATAGCAATGCTAGAAAGAACAATCCGCAGAAGTACCATGCAAAGAA  
AGCATGTTCCGCTGCGGTGTGCAGTAATTGCAAGCAAGCTTTTATTCCTCATAACAGTTTGTGCTTCTTGT  
GGTTTTTACAAAGGCAAAGCTGTTATTACGGTTGAGAAGTAATCCAGCACGTAAAAGAAATTCATGAAAG  
TGCGTCTAGGCGTAGATATGATGGGAGGAGATCATGATCCCTCTCGTTGTTTGGGAAGCACTGGGAGAAGT  
TCTTCTTTCGTCAACAGGTGAACAGCCAGTGAAGTTCACCTGTTTTCGCTACGTCGGATGTTACCACCAA  
TTAATGAATTCCTCCGCTGTCTCGTTCGGTTCGGATCGTGACCCGACAGGATTTTGTCTCTATGGAAGATT  
CCTTATTAGCTGCTGTTTCGTAATAAAGCGGTCCCTCGATGGCTCTAGGATGGATGCATTGCAGCAAGGGGA  
TCTTGACGGTTTTGTTTCTTCAGGAAATACAGCAGCTTTAGTGACGCTTGTCTGTTCCAAAATACCTATG  
ATTCCTGGCTGTTCTTAGACCCGCATTGTTGGTTTCTGTTCCGACTCTTCTGGATTTGCGGTTATTTTAG  
ATGTCGGAGCCACAGTGTCCGTGAATCCGACGAGATGGTAGGTTTGTCTCGTATGGGTTTGGCTTATCG  
GCAATCGTTGTCTCTAACAGTAACCAGCCGTTTACTCTGGGTACTGAACATTTGGTTCAGAAGAACGC  
AAGGGAACGGATTCATAAACAGACCTTTTCGTATGCTTCGGAACATCTTTGGTAGCGCTTTTTTAGGAA  
ACATAGAAAGTGGCGATGTCTTTAGCGGCAAAGTAGACATTGTGGTTACAGATGGGTTCAGTGGGAATGT  
CTTTTTGAAAACGGCGGAAAGGGTTATTCGATTTTCTACGACATATTCCTCGGGATCGTTTGGAAAATCG

ATTAAGATGCAGTTTGATTACACAATCTATCC TGGTTCTATTATCAGTGGCTTATCTAGACTAGTGATTA  
AATGCCATGGTAAATCTCATGGAACAGCTTTGTTCCGAGGAAT TTCCGGGGCGATTGATTTAGCACGAGC  
TAATGTTTGTAGTCGTATTGCAGACAGTTTGGTGATAACGTAGTTTAGCTTGATCACCTTTTCAGTGGC  
CTAAGGGTCTGTTCTTTATAAAAAATCTTTCTCAAAAAGCAGTCAGCATTGTACATTC CACGGTCTAAGC  
TCTAATGTCGTCTCTGGAGCTTGTCTATGGT CGTTTTGTCTTTGTGAAATCACAGGCAGAACGCGTTGT  
TGGACCGATTGTTCCGGTACGCTAGTTTGTCAAAAAAGTGCTATTTCCGAGGTTTGAATGAGT TCCGAG  
AAAGATATAAAAAGCACCTGTTCTAAGTTTTCTTTGTCTGTAGTAGCAGCTATCC TTGCCTCTGTTAGCG  
GGT TAGCTAGTTGCGTAGATCTTCATGCTGGAGGACAGTCTGTAATGAGCTGGTATATGTAGGCCCTCA  
AGCGGTTTTATTGTTAGACCAAATTC GAGATCTATTC GTTGGGTCTAAAGATAGTCAGGCTGAAGGACAG  
TATAGGTTAATTGTAGGAGATCC AAGTTCTTTCCAAGAGAAAGATGCAGATACTC TTCCCGGGAAGGTAG  
AGCAAAGTACTTTGTTCTCAGTAACCAATCC CGTGGTTTTTCCAAGGTGTGGACCAACA GGATCAAGTCTC  
TTCCCAA GGGT TAATTTGTAGTTTTACGAGCAGCAACCTTGATTC TCCCGTGACGGA GAATCTTTTTTA  
GGTATTGCTTTTGTGGGATAGTAGTAAGGCTG GAATCACATTAAC TGACGTGAAAGCTTCTTTGTCTG  
GAGCGGCTTTATATTC TACAGAAGATCTTATCTTTGAAAAGATTAA GGGTGGAT TGAATTTGCATCATG  
TTCTTCTCTAGAACAGGGGGAGCTTGTGCAGCTCAAAGTATTTTGATTCATGATTGTCAAGGAT TGCAG  
GTTAAACACTGTACTACAGCCGT GAATGCTGAGGGTCTAGTGC GAATGATCATCTT GGATTTGGAGGAG  
GCGCTTTCTTTGTTAC GGGT TCTCTTTCTGGAGAGAAAAGTCTCTATATGCCTGCAGGAGATATGGTAGT  
TGC GAAT TGTGATGGGGCTATATCTTTTGAAGGAAACAGCGCGAAC TTTGCTAATGGAGGAGCGATTGCT  
GCCTCTGGGAAAGTGCTTTTTGTGCTAATGATAAAAAGACTTCTTTTATAGAGAACCAGCTTTGTCTG  
GAGGAGCGATTGCAGCCTCTTCTGATATTGCCTTTCAAAC TCGCAGA ACTAGTTTTCAAAGGCAATTG  
TGCAATTGGAACAGA GGATAAAGGTTCTTTAGGTGGAGGGCTATATCTTCTCTAGGCACCGTCTTTTTG  
CAAGG GAATCACG GGATAACTTGTGATAA GAATGAGTCTGCTTCGCAAGGAGGCGCCATTTTTGGCAAAA  
ATTGTCAGATTTCTGACAACGAGGGGCCAGTGGTTTTTCAGAGATAGTACAGCTTGCTTAGGAGGAGGCGC  
TATTGCAGCTCAAGAAATTGTTCT ATTCAGAACAATCAGGCTG GGATTTTCTTCGAGGGAGGTAAGGCT  
AGTTTCGAGGAGGATTGCGTGT GGATCTTTTTCTTCCGAGCGGTGCTTCTGTTTTTAGGGACTATTG  
ATATTTCAAGAAT TTAGGCGCGATTTCGTTCTCTCGTACTTTATGTACGACCTCAGATTTAGGACAAAT  
GGAGTACCAGGGAGGAGGAGCTCTATTTGGTGAATAATTTCTCTTTCTGAGAAT GCTGGTGTGCTCACC  
TTTAAAGACAACATTTGTAAGACTTTTGCTTC GAATGGGAAAATTC TGGGAGGAGGAGCGATTTTAGCTA  
CTGGTAAGGTGGAATTAACCAATAATTC CGGAGGAATTTCTTTTACAGGAAATGCGAGAGCTCCACAAGC  
TCTTCCA ACTC AAGAG GAGT TTCTTT ATTCAGCAAAAAGAAGGGCGACC ACTC TCTTCAGGATATTC  
GGGGAGGAGCGATTTTAGGAAGAGAAGTAGCTATTC TCCACAACGCTGCAGTAGTATTTGAGCAAATC  
GTTTGCAGTGCAGCGAAGAAGAAGCGACATTATTAGGTTGTTGTGAGGAGGCGCTGTTTCATG GGATGGA  
TAGCACTTCGATTGTTGGCAACTC TTCAGTAAGATTTGGTAATAATTACGCAATGGGACAAG GAGTCTCA  
GGAGGAGCTCTTTATCTAAAACAGTGCAGTTAGCTGGAATGGAAGCGTCGATTTTTCTCGAAATATTG  
CTAGTTTGGGAGGAGGAGCTCTCAAGCTTCTGAAGGAAATTTGTGAGCTAGTTGATAACGGCTATGTGCT  
ATTCAGAGATAATCGAGGGAGGGT TTATGGGGT GCTATTTCTTGCTTACGTGGAGATGTAGTCATTTCT  
GGAAACAAGGGT GAGT GAATTTAAAGACAACATAGCAACACGCTTTATGTGGAAGAACTGTAGAAA  
AGGTTGAAGAGGTAGAGCCAGCTCCTGAGCAAAAAGACAATAATGAGCTTTCTTTCTTAGG GAGTGTAGA  
ACA GAGT TTTATTACTGCAGCTAATCAAGCTCTTTTCGCATCTGAAGATGG GGATTTATCACCTGAGTCA  
TCCATTTCTTCTGAAGA ACTTGGCAAAAAGA GAGTGTGCTGGAGGAGCTATTTTTGCAAAAAC GGGTTC  
GTATTGTAGATAACCAAGAGGCCGTTGT ATTC TC GAATAACTTCTCTGATATTTATGGCGGCGCCATTTT  
TACAGGTTCTTCTCGAGAAGAGGATAAGTTAGATGGGCAAATCC CTGAAGTCTTGATCTCAGGCAATGCA  
GGGGATGTTGTTTTTTCCGAAATTC CTCGAAGCGTGATGAGCATCTTCTCATAACAGGTGGGGGAGCCA  
TTTGTACTCAAAATTTGACGATTTCTCA GAATACAGG GAATGTTCTGTTTTATAACAACGTGGCCTGTTT  
GGGAGGAGCTGTTCTGATAGAGGATCATGGTAATGTTCTTTTAGAAGCTTTTGGAGGAGATATTGTTTTT  
AAAGGAAATTC TTTCTTTCAGAGCACAA GGATCCGATGCTATCTATTTTGCAGGTAAGAAATCGCATATTA  
CAGCCCT GAATGCTACGGAAGGACATGCTATTGTTTCCACGACGCATTAGTTTTTGAANAATCTAAAAGA  
AAGGAAATCTGCTGAAGTATTGTTAATCAATAGTCGAGAAAATCC AGGTTACACT GGATCTATTC GATTT  
TTAGAAGCAGAAAGTAAAGTTCTCAATGTATTC ATGTACAACAAGGAAGCCTT GAGTGTCTAAATGGAG  
CTACATTATGTAGTTATGGTTTTAAACAAGATGCTGGAGCTAAGTTGGTATTGGCTGCT GGATCTAAACT  
GAAGATTTTAGATTCAGGAACTCCTGTACAAGGGCATGCTATCAGTAAACCTGAAGCAGAAATC GAGTCA  
TCTTCTGAACCAGAGGGTGCACATTC TCTTTGGAT TGCGAAGAATGCTCAAAACAACAGTTCTTATGGTTG  
ATATCCATACTATTTCTGTAGATTTAGCCTCCTTCTTCTTAGTCAACAGGAGGGGACAGTAGAAGCTCC

TCAGGTTATTGTTCTGGAGGAAGTTATGTTTCGATCTGGAGAGCTTAATTTGGAGTTAGTTAACACAACA  
GGTACTGGTTATGAAAATCATGCTTTGTTGAAGAATGAGGCTAAAGTTCCATTGATGTCTTTGTTGCTT  
CTAGTGATGAAGCTTCAGCCGAAATCAGTAACTTGTCGGTTTTCTGATTTACAGATTCATGTAGCAACTCC  
AGAGATTGAAGAAGACACATACGGCCATATGGGAGATTGGTCTGAGGCTAAAATTC AAGATGGA ACTCTT  
GTCATTAATTGGAATCC TACTGGATATCGATTAGATCC TCAAAAAGCAGGGGCTTTAGTATTTAATGCAT  
TATGGGAAGAAGGGGCTGTCTTGTCTGCTCTGAAAAATGCACGCTTTGCTCATAATCTCACTGCTCAGCG  
TATGGAATTCGATTATTC TACAAATGTGTGGGATTC GCCTTTGGTGGTTTTCCGA ACTCTATCTGCAGAG  
AATCTGGTTGCTATTGATGGATACAAAGGAGCTTATGGTGGTGTCTCTGCTGGAGTCGATATTC AATTGA  
TGGAAGATTTTGTCTAGGAGTTAGTGGAGCTGCTTTCCTAGGTAAAATGGATAGTCAGAAGTTTGATGC  
GGAGTTTTCTCGGAAGGGAGTTGTGGTTCTGTATATACAGGATTTTTAGCTGGATCC TGTTCTTCAA  
GGACAATATAGCCTTGAGAAACACAGAACGATATGAAAACGCGTTATGGAGTACTAGGAGAGTCGAGTG  
CTTCTTGACATCTCGAGGAGTACTGGCAGATGCTTTAGTTGAATACCGAAGTTTAGTTGGTCCCTGTGAG  
ACCTACTTTTTATGCTTTGCATTTCAATCC TTATGTGCAAGTATCTTATGCTTCTATGAAATTC CCTGGC  
TTTACAGAACAAGGAAGAGAAGCGGTTCTTTTGAAGACGCTTCCCTTACCAATATCACCATTCCTTTAG  
GGATGAAGTTTGAAT TGGCGTTCATAAAAGGACAGTTTTTCAGAGGTGA ACTCTTTGGGAATAAGTTATGC  
ATGGGAAGCTTATCGAAAAGTAGAAGGAGGCGCGGTGCAGCTTTTAGAAGCTGGGTTTGATTGGGAGGGA  
GCTCCAATGGATCTTCC TAGACAGGAGCTGCGTGTGCTCTGGAAAATAATACGGAATGGAGTCTTACT  
TCAGCACAGTCTTAGGATTAACAGCTTTTTGTGGA GGATTTACTTCTACAGATAGTAACTAGGATATGA  
GGCGAATGCTGGAT TCGGATTGATCTTTTAATGGAT TGGAAGAGCTAACAGCAACCATTCATCCCTAAT  
CTCCCATCAGAGATTAGGGATTTTTTTTTATTAGCTAGTCAATAAGTTGAGGAGAAGATAGAATCTTCTT  
TTTTTTTCGCTAGGAAACAAAATTTGTGCAGAAATAGGTCTGAGGCTGTTTTTTTTGGTCCATCTGCATGA  
CGATCATTTAAAGGAGATTCGATGACTACTCTTCCAATACTTGTACTTCAA ACTCCAATTC TATAAATA  
CTTTCACGAAAGATATCGAAATGGCAAAGCAGATCC AAGGCTCTCGGAA GGATCCCTTTGCTAAAACCTC  
ATGGATCGCAGGAT TGATCTGTGTTGTTGCTGGGTTATTGGGACTTCTTGTATAGGAATAGGAGGATGT  
TCTATGGCTTCCGGAT TAGGATTAATCGGTGCTATAATTGCTGCTGTCGTCGTAGCCGTCGGTTTATGCT  
GCTTGGTATCAGCTTTATGCTTGCAAGTTGAGAAATCTCAATGGTGGCAGAAA GAGTTTAAGTCTTGGAT  
AGAGCAAAAATCC CAGTTTAGAAT TGTAAATGGCTGACATGCTCGAAGCAAATCAGAAATTGCAATCAGAA  
GTGGAATTCCTTTCAAAGGTTGGAGCGATGCTGCCGAGTGCACAAGGAAGATGTGACGAAGTATGAGC  
AAGTTGTTGAAAAATATGGTGAGAAAATTATGAAGCTATATAAGCAAACAGGTGTTCTTACCATAGAAAA  
AGTCAATCTTCAGAAAGAGAAAAAACTTGGCTGGAAGAGAAAAGCTGAAATGGAGCAAAAATTAACAACC  
GTTACGGATCTGGAGGCAGCAAAAACA AATTAGAAGAGAAAAGTGACAGATCTAGAGTCAGAGAAAACAAG  
AGTTGCGTGAA GAAT TAGACAAAGCTACAGAGAATCTTGATGAGATGGCTCATGAAGCGATGGAATTCGA  
AAAAGAAAAACATGGTATCAAACCAGGAAGACGTTGCGATATAGAAGAAGACGAATGTCTAATTCGTT  
GTTTTTTAATAGAAGCCTGGCCTGTAGTAATAAGACCAGGCTATTTTTTTTTGGATTCGTTAATCTCGAC  
GACTTTCATCAATAATGGACTGAGTAAAGTCTTGAATCTCTTTGAAAATATTTTAGCCAGCAGTTTGGT  
CTGTTCTGCAAATTC TCGTGTGTGGTGCCTTAGAGTTTTT GAGTAGGGCTCGGCCTTCTCGTGCCGGAT  
GTCTTGACGCGGAGAAGCTTTTTTCTGATTTGCATCC CACTTTTAGGGAGGAAAAGACTAGTAAGTAGTG  
TAGCTAGGAACCTTCCGAATAGGACGCCTCGCAACCATAAGCAACATTTATTTTTTTTAGGTTTTTGGCT  
TCTGAACATCC TTTCTCCACAAACAAGTTAATCTTTTTTTCTTATCAAGAGCCATGCGCATAGGGCTA  
TAGCGGCAAGTTTGGCTCCACAAAGTAGGCGGCTGCTGCAACTATTTTCAGAGTCTTCATTATCC TCAAG  
TTCGTCGCTAGCTGAGACATTTCCGGTCGGCATACTTCTTGCCTAACCAATTTAGAAATAAATTTTTTG  
CCAATCAATAGAGGTGCAAGCCATCGAGCTTCGAAGTTGAATAGAGAAGAAATTC GACTGACAAGTTTCA  
TAATCTTATGGAGCTTGAGCAGTAGGCAGATGGTAAAGGCAAAAATCAAGACCATCCCTAAAGAAAGCAG  
AATGCAACAGGCAACTAAAGCTTCTATCAAATAGGGGTCATAAAAACAAAAAATAAATCATTTAGTTT  
TCGATAATTATTTCTTACTTCTTATTTAAAAAGTGAATGGCCGTTTGAATTTTTGTTTGGTTATAAATA  
GTAAGCTATTGATACCAGATTGATGTTTGGAGAAATGTCTTAAGAAGGCGAAT TGCAAAGATTTTGATA  
AAAATAGGGAATATTTATCTCTGAAAATCAAGGATCAGTTAGTTTGGAGCCAAA GGATATTCCTTAGGGAT  
AGAGCAATGACACGTGATGTGAGCCAGCTATTTGGAAGTACGCGAGT GCGAGGACGGGCAAACTTTGAGC  
CTATGACGGTGGAACCTTCTGTTCTCCTGGTAAGGCCATTGCAGGGGTTGTTATTAGAGAAACATGCCGG  
TAAGCATCGCGTAGTTGTTGGTAAAGATACCCGACTCTCTGGATATATGTTTGAATAATGCTCTGATAGCA  
GGTCTTACTTCTATGGGATAGAAAACCTTGATGTTGGGACCTATCCCTACCC CAGGAGTGGCATTATTA  
CTC GAGCTTATCGTGCAGATGCTGGAT TATGATTT CAGCATCGCACAATCC TTATCGAGATAATGGAAT  
TAAGATTTTCTCTTCGGATGGATTC AAAATTGGCCAGGCAGTGGAAAGAGCGTATCGAAGCCATGGTTGCT



TCGAAAGATTTTGGGAACTTCCTGATGATCATGCTGTTGGTAAAAATAAACGAGTCAAAGATGCAACAG  
GAAGATATATTGAGTATGCGAAGGCTACCTTCCCGAAAGGGGAGAACGTTAAAAGGTTTGCATATTGTTTT  
AGATTGTGCTCATGGAGCCACTTATCGAGTAGCTCCTTCCGTATTTGAAGAATTAGACGCAGAAGTGATC  
TGTTATGGGTGTGAACCTTCGGATGTAATATCAATGCAGGGTGCGGAGCTTTATGGCCTTCTACCATTC  
AGAAAGCAGTTATTGAACACAAAGCAGATGTAGGAATTGCATTAGATGGAGACGGGATCGTCTGATCAT  
GGTTGATGAGAAGGGGCATATTGTAGATGGAGATATGCTGTTAAGCATCTGTGCAAGTGATTTAAAACGA  
CGACAGGCTCTACCTGATAATCGTGTAGTGGCAACAGTGATGACCAATTTTGGTGTATTGCGTTATTTAG  
AAAGTCTGGGATACAAGTTACAATTTCTCCTGTAGGAGATCGACATGTATTGCAGCATATGTTGGAAAA  
TCAAGCTGTGCTTGGAGGAGAACAAGCGGGCATATGATTTTTCTCGATTACAATACAACAGGGATGGG  
ATCGTATCTGCTCTTCAAGTGTGCGTATTATGATCGAAAGTGAATCGACATTATCCGATCTTACAGCAT  
GTATCGTAAAGAGTCTCAAGCGCTAATCAATGTCCCTGTGACGAAAAGGTGCCCTAGAGTCTTAGC  
TAATGTACAAGGGGTGCTCAAAGAAGTAAAAGAGGTCTTGGGGGATTCGAGGATTTTGTAAAGATAT  
TCGTTGGTACAGAAAATATTTGCAAGTATGGTTCGAGGGGACTAAAAGCATCAAGTGGACTCCCTTGCTA  
AGACAATTGTTGATGTTGTAGAAGCCGAAATTGGAGCCGGATTTCCGAATAAAAGGATCGATATGTGTG  
GGATATTTGGATATTTAGGAGAAAAGAAGCTGTACCTTTAGTTTTGGAAAGGGTGTCTGAAGTCTGAGTA  
TCGTGGTTATGACTCTGCAGGGATAGCAACTCTTATTGAAGGCCGCTTGTGTTGTAGAGAAGGCTGTAGGG  
CCTGTAAGCCAGTTATGTTCTGCTGTTTCTTCTGATATCCATTCCTCAGGCAGCTATAGGTCATACGCGAT  
GGCTACACACGGAGAACCTTCCCGCTTTAATGCACATCCCATATAGATATGGATGCGAGTGTGCTTT  
GGTGCATAATGGAATTATTGAGAATTTCCAAAACTCAAAGAAGAACTGGAAGAGCAGGGCGTAGTATTT  
TCATCAGATACCGATACAGAGGTTATCGTACAACCTTTTTGCAAGCGTTACAAAAGAGACAAGAGATTTAA  
TTCAAAGTTTTTCTGTTGACTCTCAAACGCTTACAGGGGAGTTTTGTGCTTGTGCTCTCATGCACCAAGATCA  
TCCGTAAGTTTTTATTATGTGCTGCTCATGAAAGTCTCTCATCCTAGGATTAGGAGAAGACGAGTTTTTT  
ATTTCTTCTGATATCCATGCTTTTTTAAAATATTCGGCTGTACACAAACCTTGGCTTCAGGAGAACTAG  
CTGTTTTACGTATAGGGAAGTCTATCGAGACGTACAATTTTTGAGTTAGCGCGTATCCAAAAGGAAGTGG  
TTGCATAGACCATACAGAAGATTC TTTGGATAAAAAGGGTTGATTATTACATGCTCAAAGAGATCTAT  
GAGCAACCTGAAGTCTTTGAGCGTATCTTACATCTCACGTGTGAAGAGAACAGTTTTACAGAATCTTTTT  
TAAAAGGGTTCTCTTTGGACGAGATTCAGAGCTTGCATATTGTAGCTTGCAGCTCTTCTTATCATGCCGG  
CTATTTAGCCAAATATGTGATTGAATCTATCGCTTCCATTCGGGTGTATGTAGAAATTGCTTCAGAGTTT  
CGTTATCGTCAGCCATATATAGCAGAGCATTCGCTAGCTATTCCTCATCAGTCAGTCAGGAGAAACGGCAG  
ATACGTTAGCCGCTCTTAATGAGTTCGCGAAGTTGAGCAAAGCACGTGTTCTCGGGATTTGTAATGTACG  
AGAGTCCGCTCTTGCTTCTCGAGTGCACCATTGCTGTTTATTGAGGCGGGATGGAAGTGGGAGTCTGCT  
TCTACAAAGGCATTCACAGCTCAGCTGTTGCTGATTCTTTGGTTTAAAGCTAGCAAACCATCGCC  
AAGTCATTGCTCAGGAAGACTTAGCGCAAGCAATACAAGGTCTGAAAGATTTGCCAAATTTGACAAGACT  
TTTTCTAGATAGTTCTATTCATGACTGGCGTTGCCGACAAATTGAGGAGACGAGTTTTATTTCTTAGGG  
CGACGTTTTATGTATCCAAATTTGCATGGAAGCAGCTTTAAAATTTAAAAGAAATTGCTTACGTAGAAGCAA  
ATGCTTACCTGTCAGGAGAAATGAAGCATGGGCTATTGCTCTTATTAGAGAGGGGACTCCCGTGATTGT  
GTATTGTGGAGACCGCTCTGTATACACTAAAATATAGGAGCGATCATGGAGGTGAAGGCTAGAAAGGCC  
TATGTGATCGCTCTTGCTCCGGAATCCAAATCGGGATATCGCTGCTGCTCCGACGAGCAGATCTATATCC  
CCGATAGCCACGACCTTGCTGCTCCTATCTTATTCACGATAGCAGGCCAGATCATGGCTTACACCATGGC  
TTTACAGAGAGGAACCGAAGTAGATAGACCTCGGAACCTGGCTAAATCTGTTACTGTAGAGTAAAATCTA  
CAGTTTTTTCTCTTTGATGAATAGCATAAGCGTGTATCTTAGATGGAATCGAGAAGTCGCAAATCCA  
TGCGACTCTCTAAAAAAGGTATTCCTATGATAAAACAAAATGTTGGGCGGAGCCTTGCTTGTGCGAGGAAC  
AACCATTGGCGCCGAGTATTAGCCGTCCCGTTCTACCTCAGAAGGGGATTCCTGCCTACGACGTTA  
CTCTATATTGTTTTCTTGGTTTCATTGCTGTGGCTTCCGGGTATTGCTTTTTTGGAAAGTATTGACCTGGACAC  
ATTC AAGAAAGAATGTAATATGGTCTCTATGGCAGAGTATACTTTAGGCCATAAAAGCAAGATCATTAT  
GTGGTTGGTATACCTACTGCTCTTTTATTCCTCTTGGTGGCTTATTTTTGTGATGGTGGGAATATTCCTC  
ATGCAGTTCATGGATGTCGCAGTTGGATACTCTTGGATTCGACATGCTATGCCTGTAGTATTTTTTG  
CTTTGTTTTCCCATTTAATGGCGAAAACATCCATTATCGATCAATGTAACAGGGTTTTCGTTTTTTGG  
CTTAGGAATCGCATTCGCTATGTTTTGCTATTTCCGTTTCCCTCTTATGAAAACGGATTTGTTAGTAAGA  
TCTGCTTGGGGAGCTACTTTAAAAGGATTTCCCATTTTATTTTTGGCATTGATTTGATTTCAAACGTTGTT  
CTACGTTGTATCACTACATGGATAAGAAGCTAAAAGATGTGAAGAAGGCCATTGTTATTGGAAGTTCGAT  
TCTCTTTGGTTCTGTACATCATTTGGGAAGCCATTGTGTTAGGAGCCGTTCTATTTCTTTCTTAGAACAA  
GCGAAAGTAGAGGGATGGACTGCTATTGGAGCATTACAACAGCTTTGAAATGCGCGGCTTTTTTATGTTG

CAGGGGAGTTTTTGGATTTTTGCTTTAATTTCTCATTATTTGCGCTCTCTTTGGGTTTAAAAGACTT  
TTTTATAGATGCTTTTCAATGGATGAGAAAAAGCGTAAAGTGGAAATCTTTTTCTTAGTTTTGTTTTT  
CCTTTGGTGTGGGCTGTTTTCTATCCAGGCATTGTTTTGAAATGTTTGAGTGCACCGCGCTTAGGTG  
AGACGATAGTTTTAGGAGTTTGCCCCGATTGATGGTATGAAAGGGCGCTACGGAAAGAAACGTTATTA  
CGGTAAACGCATTCCTCGCGGAAAGGGACTCTCTGGTTATGTCAGGGCTAGTGCTTCTAACCTG  
GTGTTGATTGCCAGAAGTTCTAGGCTATTAATTCCTTCACTTCAAGTCTCAAGCTCGCATTCAGGAT  
TCCTTATGCGAGCTTCTGTAAACAGATCGAAATGATGAAAGCGCGACTGTTGCTAGTTGTTTTTCTC  
CATATAGTATAGATTGGATCGTATTGCGTAATGAGAAAGATTCCTTATCGACATGAAAAATAGGGGA  
GGAGGATGTGTATGCGAATAAGTGTGTAGGAGGAATTTAATTGTTGCGGGGACTGTAATAGGTGCTGG  
TGTGTTAGCCGTTCTATTTTACAGCTGTAGAAAGGTTTTTCCCTGCCGTGGTGCTATATGTGCTCGCT  
TGGTTGGTTTTCGTTAGCCTCAGGTTATGGCTATCTGGAGGTGTTAACCTGGTGTAAAGGAAATAGACAGG  
CTAACTTATGCTCTATGGCTGAAGAACTCTAGGGAAGTAGGACGTATAGTGTATGTTAGTCTACCT  
GTTTTCTATTTTACTCTTACTTGTAGCTTATTTTTGTGATGGAGGAAATATTCCTTCTCAGTATCGGA  
GAGAGCTTTTTCTCTATCCCTGGATGCGACATGTCATGCCCTTTTATTTTTCTCCCTTTTTGCACCT  
TGCTGATGGCAAACACTTCTGTATTGATTATTGCAATCGGGGTTGTTTTTGGCCTTATCTTTGTTTT  
TGGGCTTTTTCTGCGTATTGGGTGTGCCGCGTATACAGGGAGAAGTCTATTGCGAGCTTCTGGTTTTCC  
TCTCTAATAGCTTGCCATTTTTCTTCTTAGCATTGGATTTCAGAATGTGGTGCCCTCTTTGTATCACT  
ACTTGGATGGGAATATTCGTGAGGTTAAACGTGCTATTCCTAATAGGGAGTTTGATTCCTTTAATTCCTA  
TATTGCTTGGGAAGCTTTGGTTTTAGGGACGGTTCCCTTAGTCGACTTGCTAAAAGCTAAGGATTTAGGG  
TGGACTGCTGCAGGAGCTTTCAAAGGATCTTTAAA GAATTC TGCTTTTTATATGCCGGGAATATTTG  
GATTTTTTGCTTTGGTTACTTCTTTTATAGGGACTGCGTTAGCATTAAAGGACTTTTATATAGATATTTT  
TAAATGGGATGCTCGTAAGAAACGGGTATCTTTGTCTTTTTTAGTTCAGGATTTCTTTAGTGTGGCT  
ATTTTTTATCCCGAGATTGTTTTGTCTTGTTCACGCTATGCTGGGGGAATAGGGGAGCTTGCATTGTG  
TGTTATCCAGTAGCCATGTTATGGAATGGACGCTATGGAAACGGCGTTGCTTTGGTAAAAAGGATATT  
GCCAGGAGGAAAGACCCTTCTATTAATTCCTAACAGGATATACTGTGTTAAATCTTGCAACCCGTATTAT  
GCGTTTTAGAAAAGAGTTATGTA AAAACTATTTTAAATTAGGAGATCTCCATGGGATGATGATCGCGA  
TTATGCGCAGGATTCCTGCTTCCAGGGACCTTCTCTTCCAGAGTATATGGGTGGATGACGGCAGGGCTA  
GCTGTGACTGCTCTAACATCTCTAGGGTTATACGCAACAGGAGCGTACAGAGCGCTTTTCCCTATGTGGT  
GGATTTGGTGTTTTGAACGCTGGGAGTGTCTTCTATATCCAGCCAGATTCAAAACTTTCTGTCC  
TGCTGTAATGGGATGTTTTTTGGCCTACTCTATTC TAGAAGGGATGTTCTTTGGAACATTGGTACCCGTA  
TACGCCGCTCAATTTGGAGGCGGGTAGTGTGGGCCGATTTGGGTCTGCTGGTATAATCTTCGGATGTT  
CAGCAGCGTATGGAGCATTCACTAAGAATGATTTAACACAAATTCATAGAATTTTGATGTTGGCACTTGT  
GGGCTGGTAGTGATATCTCTAGCCTTTTTAATAGTGTCTCTCTCACGCCATGCCGTTGTTATATCTG  
TTAATTTGCTACTTAGTTTTGATTATCTTTGTAGGCTGACAGTAGTGGATGCGCAGTCTATTCGTCGTG  
TTGCTCGTAGCGTAGGGATCATGGAGATCTTAGTTATAAGCTTCTTTGATCATGGCTCTACAGATGTA  
CTGCAATGTAATTATGATATTTGGTATTTGTTGCAGATTTTTGCCCTTCTGACAAGAGACGGTAAAGG  
TCGATCGAAAATAGATTTCTAGGAAAAAAAAGAGGTATTTAGAGTTCCTAAATACCTTTTTTTATGGG  
TGAAGAAGGAGGGGATTTTCAGTTCAAACATCCAGTAATTTATCTAGAAAACGGTCTATGGCAAAGGT  
TCGAAATCATGAATGTTTTCTCCATAGCCTACGAACCAGTAGGGATTTTGAGTTCATCTGCGATACGGA  
AGAGAGAGCCTCTTTGGCAGAACCCTTCCACTTTTGTGAAAATAAGTCCATTGATAGGTACGGCTTCATG  
GAATAGTTGCACCTGACTCAATGTGTTGCTTCCAGAGTAGCATCGATCGTCATCAGTGTCTCATGCGGA  
GCTCCAGGAAAAGCTTTGTTGCAAACGGTAGCGATTTTCTGAAGTCTTTAAGAAGATTCGTGTGTGTGT  
GTAACCTTCCCGAAGTATCTATGATCACATGATCATAGTCCCTAGCGACTGCTGCAGAAATCCCATCAA  
AGCTATCGCAGCAGCATCTCCTCCAGGTTTCCCTGAGATAAAACCCACAGTTAAGGTTTCTGCCAACAA  
CGCATCTGGTCCATTCCTGCGGAACGGAAAGTATCAGTAGCTACAATTA AACCTTTTGGTTTTGAGAAA  
GATAATAGTGAGCCAGTTTCGCAACTGTGGTTGTTTTCCCCGAGCCATTCGTTCTAGGACAAAGAGT  
AAAAGGACGAACAGAAAGAGGCTCTCGTTGGGGGAGCTTAGAAAATAATCTTTGATAAGAAAGAGCGAAT  
AGCTCTTCTACTGCCGTTTTCATCAGGATTTTTACATCGGCGTAATTCCTTCGAAAAAGCTTCTGT  
TAGGGCCAAAATCTCCCTCATAAAGAACTTCAGCATATTCCTAATAAGTCAGAAGAAAGCGTTCTTTT  
AAAAAGAGAGCGGAGTTGTTTTCCGAAAACCTTGAACACTGAGTAATCAAAGTTGATTGAAGTAAAAA  
ATAATAAAAGATAAGGAGGAAAAATAAAAGGTATTTATGCATCTTCATGAGTATCAAGCTAAGGACCT  
TTTTAATGCTTATCAACTTCCTATTCCTCCCTATCACGTAGCGACCTCCGTACCTGAAGTAGAAGCAGCG  
ATTCAGCCGAACAATGGAAAGCTGGTGTGTGAAAGCACAGGTTTCATGCTGGAGGAAGAGGAAAAATG

GAGGGGTGGTTATTGCGCACTCTCCGGAAGACTTATTAGCAGCAGCTGATAAGCTACTGCATATGCAATT  
TTCTAGTAATCAGACAGCAGGGTGTCTCTTCTGTTAATAAAGTATTGATTTCCCCTTTAGTAGAGATT  
GCTTCGAGTATTATCTTGCATCGTCATCGATAGAAAACATCGTTGTCCTGTCATTATGCTATCTAAAG  
CAGGAGGTGTGGATATCGAGGAAGTCGCAGAAAAGCAGCCGGATCAGCTGCTTAAAATGACACTACCTTC  
TTCTGGAAAAATTTATGGGTATCAGTTACGCCGTATTGCTAAGTTCATGGAGTGGATCAACCTATTGCC  
GATCAAGGGAATCGTATCATTCGCCAGTTATTACAATGTTTTTATGAAAAGGATGCTTCTTTATTAGAGA  
TTAATCCATTGGTACTTACTAAAGACGGGTCTCTTGTCAATTCGGATGCCAAAATGACGATTGATGACAA  
TGCTCTTTATCGACATCCTGAGCTAGCAGACTGCTATGATCCCTCTCAGGAAAATATTCGTGACGTACTA  
GCTAAGCAGTTAGGCCTTTCATACATTGCTCTAGATGGAACAATCGGATGTTTTAGTCAATGGTGCAAGAT  
TAGCGATGAGCACCTTAGATATTCGAAAGTTATATGGCGGTTCTGCTGCCAATTTCTTAGATGTAGGAGG  
AAGTGCTTCTGAAAAGCAAATTCAGAAGCTATCTCTTTAGTCTTATCTGATAAAAAGTGTGCGCGTGCTC  
TTTTATCCATATTTTTGGGGGGATATGGATGTGTCAGTCGTCGCTTCTGGACTTGTCTGCTATGCAAG  
GACAGAAAAGAAACGATCCCTACTGTAATTCGGTTAGAAGGGACGAATGTAGATAAAGGAAAGGGCATGAT  
TATTAACGCAGGAATTCCTTGTGAGTTCGTTACATCCATGAGCGAGGGGGCTGAACTCGCTGTGCAATTA  
AGTCGTTAGCTGGGAGAGAACTGTGTTAGAATATTAAGCAAAGGATTTACCGATTATTACACAAGGTAT  
TACAGGAAAAGCAAGGTCTTTTACACTACACAATGTGTGCTTACGGATCTAACTTTGTGGAGGAGTT  
ACTCCAGGAAAAGGGTGGGAGCCAATTTTTAGACTTACCATTTTTTGATTCGTTTTTGGAGGCTAAGCAAG  
CAACAGGTTGTGCTGCTTCGATGATTTTTGTGCCGCCACCCTTGTGCTGCAGAAGCCATTTTTCGAAGCTGA  
AGATGCTGGAATTGAGCTGATAGTCTGTATCACAGAAGGAATTC CAATCAAGGATATGCTTGAAGTAGCT  
TCTCTTATGAAAAAGAGCGCAAGCTCTTTAATTGGGCCAACTGTCTGAGT GATCAAGCCTGGAGTTT  
GTAAAATTGGCATCATGCCTGGGTATATCCACCTTCTGGGAAGGTAGGAGTGGTTCTAGATCAGGTAC  
ACTTACGTATGAGGCTGTTTTGGCAACTTACGCAAGAAAGATCGGACAGAGTGTGTGTATCGGTATCGGA  
GGGGATCCTTTTAAATGGCACATCTTTTATCGATGCTCTCCAAGAGTTTGAAGGATAGCCAAACAGAAG  
CTGTTCTTATGATTGGAGAGATTGGTGAAGCGCTGAAGAGGAAGCTGCAGATTGGATACGTCAACATAG  
TAGTAAGCCTGTGATTGCATTTATTGCAGGAGCTACGGCTCCCAAAGGGAACCTATGGGACATGCAGGA  
GCTATTATTTTCAAGGAAAAGTGGGGATGCTTTTTAGCAAACAAGAAGCTTTGAGACAGGCAGGGTTACCG  
TTGTAAGAACTCCTGCACTGATTGGAGAGGCGGTTGCATCCGTTCTAAAACCACGTTAGTTTTTTAGATT  
GGAGAATCATCAGAGTAGTCTCCTTGATTTGCATCATTAGATTTTGTATGCTGCATATCTGCTTGTATG  
GTGCATAAAATGAAAAAAAAGGGCCCTAGACGCCAGATCGCTTATCAAGGAAAAGATGATGAAAAGAT  
TATTATGTGTGTTGCTATCGACATCAGTTTTCTCTTCGCCAATGCTAGGCTATAGTGGCTCAAAGAAAGA  
TTCTAAGGCTGATATTTGTCTTGCAGTATCCCTCAGGAGATCAAGAGGTTTCAACAAGAAGATCTGCTCAA  
GAAGTATCCCGAGGATTTTTCTCGGGTCTGCTGCTAAGGCAACGCTGAGTTGTATATATAGAAAATTTTC  
CTAAAACAGGGAACCAGGCTATTGCTTCTCAGGAAACAAAAGAGGCTTTCAAGAGAACCCTTTGATTA  
TTTTAATGACGAATTTTTTAATCGATTTTTTGGGTGCTTTCGTATAGAGAGCAGCAGCGTCCGAGCAG  
CGTGATGCTGTAAGAGGAACTGGGTTCATTGTTCTGAAGATGGTTATGTTGTTACTAACCATCATGTAG  
TCGAGGATGCAGGAAAAATTCATGTTACTCTCCACGATGGACAAAATACACAGCTAAGATCGTGGGTT  
AGATCCAAAACAGATCTTGCTGTGATCAAAAATTC AAGCAGAGAAAATTACCATTTTTGACTTTTGGGAAT  
TCTGATCAGCTGCAGATAGGTGACTGGGCTATTGCTATTGGAAAATCCTTTTGGATTGCAAGCAACGGTCA  
CTGTCGGGTGCTTAGTGCTAAAGGAAGAAATCAGCTACATATTGTAGATTTTGAAGACTTTATTC AAAC  
AGATGCTGCCATTAATCC TGGGAATTCAGGCGGTCCATTGTTAAACATCAATGGTCAAGTTATCGGGTT  
AATACTGCCATTGTCAGTGGTAGCGGGGATATATTGGAATAGGGTTTGCTATTCCTAGCTTGATGGCTA  
AACGAGTCATTGATCAATTGATTAGTGATGGGCAGGTAACAAGAGGCTTTTTGGGAGTTACCTTGCAACC  
GATAGATTCTGAAT TGGCTACTTGTTACAAATTGAAAAAGTGTACGGAGCTTTGGTGACGGATGTTGTT  
AAAGTTCTCCAGCAGAAAAGCGGGGCTGCGCCAAGAAGATGTCATTGTGGCTTACAATGGAAAAGAAG  
TAGAGTCTTTGAGTGCCTGCGTAATGCCATTTCCCTAATGATGCCAGGGACTCGTGTATTTTTAAAAAT  
CGTTCGTGAAGGGAAAACAATCGAGATACCTGTGACGGTTACACAGATCCCAACAGAGGATGGCGTTTCA  
GCGTTGCAGAAGATGGGAGTCCGTGTTCAGAACATTACTCCAGAAAATTTGTAAGAAACTCGGAT TGGCAG  
CAGATACCCGAGGGATTC TGGTAGTTGCTGTGGAGGCAGGCTCGCTGCAGCTTCTGCAGGCGTGCCTCC  
TGGACAGCTTATCTTAGCGGTGAATAGGCAGCGAGT CGCTTCCGTTGAAAGAGTTAAATCAGGTTTTGAAA  
AACTCGAAAGGAGAGAATGTTCTCCTTATGGTTTCTCAAGGAGATGTGGTGCGATTCATCGCTTTGAAAT  
CAGACGAGTAGTCTTGGCCTTATATTTTTAGGAAGCTAGTCTAGTATGGGGACTCAATCGAGTCCCTTTTT  
TTTTTAATAAGAGAAGCCTTCAGAAA GAATATTTGTGTGGATATAAGAGCTTAACCATGTAGGCTGTCT  
TTCTTATTGTTAGGTAGAAACGAAAATAGGGGAGAGCAACAACCTTCTTATTATAGAAGATTGAGTGGGA

TATGAAAAC TGGGATACCTATAGAAATTTTGTAGTCAAGTTGAGTCAGGATCTTCCCGAGATCGAGAGC  
AAGCTAATTGAAGTGAACATACTCCGACCGGGCAACGATCATGATGATCGTGAATGATGATGATGAAA  
ATGTGTTCAATATTTCTTTTCGGACTTGCCCGCAAGATTC TAGTGAGTGGCTCACGTACTCGAGCATAT  
GGCCTTATGTGGGTCTGAGAGTTACCCAATTCGGATCCTTTTTCTCAATGACAAGACGTAGTTTAAAT  
ACCTTCATGAATGCGTTCACAGGGCTGATTTCACTTGTATATCC TGCGGCTTCTCAGATACCAGAAGATT  
TTTATAATCTACTCAGTGTGTATATTGATGCCGTTTTCCATCCGTTGTTAACAGAGAACAGCTTTTTGCA  
AGAAGCTTGAGATATGAACGGACAGAGGAAGGAAATCTCTTACACTGGGATCGTCTTCAATGAAATG  
AAAGGGGCTTTGATGTCGGGA GAATCTCGGCTCAGCGAAGCGATGAATGCCGCATTTGTTCCCTTCGGTCA  
CTTACGGTGTAAATTCGGGAGGAGATCC TAAAGCAATTGTTTCGCTGAATTTAGAAACGGTCCGCGCTTT  
TTATGAAAGTCAGTATACGCTCAGTCGTTGTCTTTTTTATTTTTATGGGAATATTAAACCTAGCCGTCAT  
TTAGATTTCTTAGAGGAGAAATTGCTGAGACGTGTAGGGAAGGTAGAGAAGCAAAGTGTAACTCTTCCTC  
TGCAGAAACGTTTTCAAAGAACCTGTACGTGTGATTGAAAGATACC TCCGATGGGGCAGATGAAGATAA  
GGTGCTTTTTGGAT TAGCTTGGCTTACTTGTTCATTTTTGATCAGCAAGATCTTCTTGCTTTACATGTT  
CTGGATCTAGTTTTAATGGGAACGGATGCAGCTCCTTTGAAATCTCGATTGCTGAAATCTGGAT TATGTA  
AGCAAGTTGATATGAGTATTGACAGCGAACTTCATGAGATCCCTGTATATATTGTTTGTAAAGGGATGTTT  
TCATTCAGGAAGTCAGAACTGGAAAGTCTAATTTTAGCTAGTTTAGAGGAGATCC TCAAGAGGGAATT  
CCGATGCATTTAGTTGAAGGAGCTGTGCATCAGCTA GAATTAGCAAGGAAGGAGATCGCAGGGTATTCTA  
TTCCTTATGGAT TATCATTGTTTTCCGAGCAGGTCTACTAAGACAGCATGGAGGGAAAGCGGAGGATGG  
GT TAA GAATCCATACTTTGTTTTGCTAACTTGCAGAGA GAATATCCAAAAGCCAGATTATCTACCACGATTG  
GTGCGGAAGTATTTCTTAGATA ACCCGCATTATGCTCGCGTCATCTTTCTCCAGATTCCTCAGTTGATTG  
CCCAAGA GAATAAAGAAGAACGTAATGTTCTACACACAATTC AAATGCAAATGAGT GAGGAA GAAT TAGA  
GAGAGT TAGAGGCAGTTCTAAGCGTTTAGAAGCATATCAGTCGCAAGAAGAAGATTT GAATAAAAGTGTTA  
CCTCTATTTGCTTTGGACAAAGTTCCTTCCCTTAGGAAA GAGT TGTGTTAGAGAAAGAAGTATTTGCAG  
AAGGTGAAGTCTTCATCATGACTGTTTCACTAATGATATTATTTTTGTGGA ACTCGTTTTTGATCTTCC  
AGCTCTTTCCGGCGGAA GAAT TGCCATGGTTACGCCCTTCTCGTTTTGTTCTGTTACAGTTGGGAAGTGGG  
AATCGCTCTTACAAAGAGCACTTG GAATTTCTTTTAGAGCATACTGGTGAGTGGATGTCCTTTATGAGT  
TCTCTTCTCAAGCTACAGATACTGATCGACTCTC ACCCTCGATCAGTATCCGTGTAAGGCTTTGATCTC  
CAAAGCAGAGTATCTGTTCCAAGTCATAAGAGAACTTTAACAACAGTAGATTTCTC GGATATTGCGAGA  
CTCAAAGAGCTTTAATGCAGCATGCA GAGTCTCTAACAATAGCGTGAGAAATAGCCCAATGGGATATG  
CGGTTAGTTTGGCCTGCTGCAATAAATCTATTGCGGGAGGCTTAGCATATCAGATGGCAGGACTTCCTTA  
TGTC AAGTATATCCGAGAGCTGCTCAGTAATTTTACTCTCAAGCACAGGAAATATAGATCGGTTGCAA  
ACGCTTTATAAGAAGTGTTTTGTTGGAAGACGGCAGCTTGTTCATCAGTAGTAGTAAAGCTAATTATCAAG  
TTCTACATGATCAGCGATTTTTTGGTTTTATTAGATGAGAGATTAGA GGGTGGAGAGCTCTGGAAAATCC  
TGTTCTTGATGTCGTGAAAGATTC TCGAGGCATTGTAATCC CCGCTCGAGGAGCTTACAATGTATTGGCA  
TTTTCTTAGGCTCACTTGCTTATGATC ATCCAGATGCCGCAGTCTTTCTGTTGCAGCAGAGGTTTTGG  
GGAATGTCATTTTACATGCTAAAATTC GTGAGCAAGGAGGCGCTTACGGCTCTGGCGCTAGTGCAAACCT  
AGGGCAGGTTGCTTTTTATTGCTATAGCTACCGAGATCCGGAAGTGGCTACTACCTATCAGGTATTGCTC  
CAAG GAATTCGTGATATGGCTGCGGGAGATTTCTCAGAAGAGGATGTGCATGAAG GAATTC TTGGTGTTA  
TTCAGAATTTAGATGATCCGATTTCTCCAGGAAGTCGTGGATCTGCATCC TACTATCGTTCGCGGAGCGG  
TAAGGTGCCTTTTCGTTTCGTC AAGCTTTCCGTCAGGCTGTGTTATCTACAAC TAAAGCACAAATTTGTGAG  
GTTGTACGTAATCGTCTTGAA GGATGCCTTTCCGAAGCCTCATTTGTTTCTTTGCTGGAGAAGAAATGC  
TACAGAAAAGCGCTAAAGAGCTTAATGAAGC ATTC CAAATAGAGGCTGCATTTTAAATAAAACCAAAGT  
TATTGTTTTGAGGAAGGAGGCTT CAGATAAGAAGCCTCTGGGGATAAGCATTC TGCCAGATCGCTTTCCG  
GACAAGGAACCTTCGGA GAATGAGGTA GGGTGTCTTACCTGAGAGAGTGTCTCGATTTTATTGTGGGAAGA  
AGAGAGCTCTAGTTTGTCAAAAGTTC TAGGGATAGGGAGAACTCTAGCAGAAAGACTAGAAGACATGTCA  
TTATAGCTATGAACAGCTTGCCCTAAGTGTTTGCC TACCTTATGGAAATGGTCAAACAGTTTATGCATTC  
TTTTGATAGAGGCTTTTCCCTAGTTGTCCAATTTCTC GAATCTGATTTTGTAAATTTTCTTGTTTCCAAC  
ATGTGTGACCGTTTTTAATAAAGCCATTAAAGTCACAGGGCTGGAAA GAATCACATTAGATTGTCTGCA  
TAGTCCATTAGTTCAGGAGCACAGC GAATAGCATCATTAATAAAC TTTCTCCAGGAAGAAAGA GAATGA  
CAAATTCAGGGGACTGCTCGAACTTATCCCAATAGCTTTTGGTTTTAA GAGT TTTAATATGGTCTTTTAT  
TTTTTTTACTAGATCAGTAGGATCCGCGTGATTATCCGTAAGGTACTCTTCAGAAAATGGAGT TTTAGCA  
TCAATAACTAGACTGCGATTTTTCGGCAAAC GAATGACAATGTCTGCTCGAGAAGAAGACTCACTGGAGT  
CTACTGTTTGGGTGCTGTAGTACAGTATTTCAACATGCCGGAATTTCAA GGATTC TCTCTAGTTGAAT

TTCACCCATCTTCCACGAGATCCAGGATGTTTCAAATATTGGTAAGAGCCTGTGTTTCTCGCTCTAAC  
TTCTGTTCTGCAGTGAGTAATTGAGAGAGTTGTTCTTTGAGAGCTCCGCGGTCTTCGGCTTGCTTAGTTT  
CAAAATTTTCTAAGTTTTGTTTAAAAGCAGATAAGGTATTATGCACCGGAGCAAGAACAGAGGTAATGGC  
TTGAGTTTTCTCAGAAA GAATTC TTGAGATTC TGTCTTCATGTCTCTAGCAAACGCCTGGGATACCGAA  
GTCAGTTTATGAGAGA ACTCCTCCATAATTTGTTCTTGACTTCGGC GAGTATCTAAAGACATTTGTAGAA  
TAGCCTTGCTATGCTCCAGATCAC GAATGATTTGCTATTGTGCG GGATAGCTTTTTGGTAAAAATTTTAAA  
GGAGAAGAGCACTC CCAGCGCTATTCCTAATGAAAA GAATGTAAAGTATAGACACACAGTTTGCGACAGC  
AAAGAAATAGCGAAGAC ACCCATATACTAAGAAGAAGATCTTTTATTAATAAAGGAAAAAACAGGAGCAA  
CAACTAGCACGTATAACCAAGAGACAAGGAAAAATAC TTGTGTGAAATGGTCCACTAGTCCCAGAGAAGAA  
GAGACAAGCCACTA ACCCGATTC CCAGAACTAAAAGCGATGAGGAAACGCGAAAAATGGAAGTGTTTTAAAT  
CCAGGGAAACGCCAGGTGGAATCATTAACAGCCACT GAGTAAATAGGCCGAGAGAGACGAGAAGA ACCC  
GAGCTCGTTCAGGAAGGCTGTTCAAGGTATCAGAGGCTAGTAGCACGCCTAAAGAGACTACACATGCTGC  
AGCGGCAG GAATAGGAAGTCTGTAAATGTAGTTGCTTTTTCTCCCGTAGCGGCAAAGAGATTATAGCGT  
ACTAAGCGAAGT ACTC CACACAGA GAGTAGATGATACAAGTCACCAGGAGGAAAGAGGAACAAAAGGTTT  
CGCCGTATTC TCCATTC AAGCTTTTAAATCGCAATTAAGGAGGCGCTATGCCAAAAGTGATAGCGTCAGA  
CAAA GAATCGAAGTGAGCACCGAAAGCACTTTCCGCTTTCATAATTC GTGCGACAGCTCC ATCCGAAAA  
TCTGCAATCATAGCGCTAATAAG GAGTAGAGAGAGCCCCTGTAAGCGGTGCATGAGCTCTAGTGAAGAGG  
AAGTTTTCAACACGCTTTTTGAAAAATAATAAG GAGTCCGCAGCAAAGACCAAAGCTGTAATGGCATTAGG  
GGT CACA ACTC GCGCTTACCACGAAGGTCTATTTCAATTC GATTC ATATCTTCCTCAG GAATCGCGGAA  
ATTTATTACAGAAATCAGTGGGGCTTAGTTTTATTTTTTTGTAGAGAAGCTTCTTTTTATGGCGT GAATTT  
GCATTTATGCAAACAAATATACATCTCCTTTGACTTGGAACTTCTAGTGCCAAAAGGACTAAACAGCGC  
ATATTTTTTACATCTTCTTTGTAAAGCCTAAGGT CATGTTACACAAAACATGTTTTCGGCCTACACAG  
AAA ACCCACAGATAGTTATGGTTATTGCGTGTTTTCCCTGAGCAAGTGAATGATAGAGAGGTAAGCTGC  
TTCTTTTTGCAAGAAAAAAGCACAAAAAAGCTAGATGTTTTATGTAGGACATCATGCTTAAAAGTTTGC  
TCTCGAAAAGAAATTTTTCATCGCAGTTTTATGCTATTTTTCAATTGCAGGAAACGTTGCTAGCTTCTATA  
TATGGTATACAAGAGCCGAGAC ATTCACAATATCTT GGGTTTTTAGGGGCTCACAT ACTCAAAGGATAAT  
ACTC TGATTTTTAAGTATAAGATAAGGGCTCTCTCTACCGTTTTTTTGACGGATAGGGGGACTAGAGGG  
TCTTTGCTTCAAATAGAGA GAATAATGCGTATTC AATGTTTTACAAGGATAGTTATGGTCGATCTACAAGAA  
AAGCAATGCACAATGTTAAGCGCAATG GAATGTTTGTTCCTTTCGATCGGAACCGTATTTTTTCAGGCTT  
TAGAAGCAGCTTTTCGAGAC ACTC GCAGAAT TGATGATCATATGCCTTTGCCTGAAGATCTGGAAAGTTC  
CATACGCTCGATAACGCATCAGGTAGTTAAAGAAGTTGTGCAAAAGATTACAGATGGACAAGTGGTTACT  
GTAGAGCGT ATCC AAGATATGGTTGAAAGCCAACATATGT GAATGGTTTGCAAGATGTTGCTCGCGATT  
ATATTGCTTATCGCGATGACCGTAAAGCGCATCGGAAAAAATCTGGCAAAGCCT ATCCGTTGTTCGTCG  
TTGTGGGACTGTTGTACACTTTA ATCC TATGAAAAATTTCCGCCGCTTTGGAAAAAGCTTTCCGAGCTACC  
GATAAGACTGAGG GGATGACTC CAAGTTCTGTGCGAGAGGAAATCAATGCTTTGACGCAAAACATTTGTCG  
CGGAAATAGAA GAATGTTGTTCTCAACAGGATAGACGCATTGATATCGAGAAG ATTC AAGATATTGTTGA  
ACAGCAACTAATGGTTGTTGGGCATTATGCTATTGCAAAGAACTAT ATTC TTTATCGAGAAGCTCGCGCT  
CGTGTTCGTGATAACAGAGAAGAGGACGG GAGTACAGAAAAGACTATAGCAGAAGAAGCTTTTGAGGTGC  
TCAGTAAAGACGGTCTACCTATACAATGACGC ATTC GCAGTTGTTGGCTCATTTAGCGCGCGCTTGTAG  
TCGTTTTCCAGAAACGACAGATGCGGCGCTGCTTACCGATATGGCTTTCGCAAATTTCT ATTC CGGCATC  
AAA GAGTCTGAAGTAGTACTGGCCTGTATTATGGCGGCTCGTGCCAATATTGAAAAGGAGCCTGATTATG  
CCTTGGTTGCTGCAGAGCTCTTACTTGACGTTGTATATAAGGAAGCGTTAGGGAAATCGAAATATGCTGA  
GGAT TTAGAACAAGCACATCGCGATCATTTCAAACGCTACATCGCAGAAGG GGATACCTATCGTCT GAAT  
GCTGAACTGAAACATCTTTTTGATTTAGATGCGTTAGCCGATGCTAT GGATCTATCTCGAGATCTACAGT  
TTTTTTACAT GGGTATTC AAAATCTGTATGATCGTTATTTTTAATCACCACGAAGGTTGCCGTTTAGAAAC  
TCCCAAATTTTTT GGATGCGCGTTGCTATGGGGT TGGCATT GAATGAGCAAGACAAGACTTCTTGGGCT  
ATTACTTTTTTATAATTTGCTTTTCGAC ATTC CGATATACACCAGCTACGCCA ACCC TGTTCAATTC AGGTA  
TGCGGC ATTC TCAGTTAAGCTCTTGCTATCTTTCCACTGTACAAGATGATTTGGTCAATATCTATAAGGT  
CATTGCTGATAACGCTATGCTATCTAAGTGGCAGGAG GGATAGGTAATGATTGGACGGCG ATTC GTGCA  
ACAGGGGCTTTAATTAAGGAACCAATGGAAGAAGTCAGGGAGT AATTCCTTTTATTAAGGTGACAAATG  
ATACAGCAGTCGCAGT GAATCAAGGTGGTAAACGCAAGGGAGCTGTATGCGTCTATTTAGAAGTTTGGCA  
CCTCGACTACGAAGATTTCTTT GAAT TGAGAAA GAATACAGGG GGATGAGCGTCGACGGGCTCATGATGTC  
AATACAGCTAGCT GGATTC CAGATCTTTTCTTCAAACGTTTACAGCAAAAAGGGACATGG ACTC TATTC A

GCCAGATGATGTTCCGGGATTACACGATGCTTATGGGGAAAGAAATTGAGCGTTTGTACGAAAGAAATATGA  
GCGGAAGGTTGATACCGGAGAGATTCGGTTATTC AAGAAGGTAGAAGCTGAAGATCTGTGGAGAAAAATG  
CTCAGCATGGTTTTTGAACGGGACACCCATGGATGACTTTTTAAAGATCCATCC AACATCCGTTCCGGCTC  
AAGATCATAAAGGCGTGGTGCCTTGTCCAACTGTGTACGGAGATTTTGTAAACTGCTCGGAGACAGA  
AACTGCTGTTTGTAAATTAAGGATCGATTAACCTAGTTCAACATATCGTAGGGGATGGGT TAGATGAGGAA  
AAACTCTCTGAGACGATCTCTATAGCAGTCCGTATGTTGGATAACGTGATTGATATTAACTTTTATCCAA  
CAAAGGAAGCTAAAGAGGCGAACTTTGCTCACCGCGCTATTGGAT TAGGGGTGATGGGATTC CAAGATGC  
CTTGATAAGCTAGATATAAGCTATGCTTCGCAAGAAGCTGTAAGAAATTGCTGACTACAGTTCA GAGTTG  
ATTTCTTACTATGCGATTC AAGCTTCTTGTCTGCTCGCTAAAGAACGAGGCACTTACAGCTCTTATAAAG  
GATCGAAATGGGATAGAGGTTTTGCTCCCTATTGATACGATTCAGTTGTTAGCGAACTATCGAGGAGAAGC  
AAATCTCCAGATGGATACGTCATCAAGAAAAGATTGGGAACCTATCCGTAGTTTGGTTAAAGAGCATGGT  
ATGCGACATTGTCAGCTTATGGCTATAGCTCCGACAGCGACGATCTCCAACATTATAGGAGTAACTCAAT  
CTATTGAGCCAACGTACAAACATTTGTTTTGTGAAGTCTAATTTGTCCGGAGAAATTCACGATTC CAAATGT  
GTATTTAATTGAGAAGTTGAAGAAATTAGGTATCTGGATGCTGATATGTTAGATGACCTAAAAATATTTT  
GATGGGTCTTTATTGGAAATCGAGCGTATAACCAGATCACTTAAAAACATATTTTCTTGACAGCTTTTGAGA  
TTGAACCAAGAAATGGAT TATCGAATGCGCGTCTCGAAGACAAAAATGGATTGATATGGGGCAATCCCTCAA  
CCTTTATCTTGCCAGCCAGACGGGAAAAAACTGTCGAATATGTATTTAACGGCTTGGAAAAAAGTTTTG  
AAAACTACGTATTATCTGAGATCTTCATCAGCAACGACCGTTGAAAAATCTTTTGTAGATATTAATAAGA  
GAGGAATTCAGCCTCGTTGGATGAA GAATAAGTCTGCTTCGGCAGGAAT TATTGTTGAAAGAGCGAAGAA  
AGCACCTGTCTGTTCTTTGGAAGAA GGGTGTGAAGCATGTCAGTAATTAATCATATAAATTAACAATAAA  
ATTAACGGTTCTTATGCAAGCAGATATTTTAGATGGAAAACAGAAACGCGTTAATCTAAATAGCAAGCGT  
CTAGTGAACGCAACCAGGTCGATGTCAACCAACTGTTTCTTATTAAGTACAAATGGGCTTGGGAACATT  
ATTTGAATGGCTGCGCAAATAACTGGCTCCCTACAGAGATCCCATGGGGAAAGACATCGAAT TATGGAA  
GTCGGATCGTCTTTCTGAAGATGAGCGGC GAGTCAATCTTTTTGAATTTAGGTTTTTTCAGCACCGCAGAG  
AGCTTGGTTGGGAATAATATTGTTCTAGCAATTTTAAACATGTAAC TAATCCGGAAGCGAGACAATATC  
TTTTAAGACAAGCTTTTGAAGAAGCGGTTACACGACACACATTTTGTATATTTGT GAGTCACTCGGAT  
AGACGAGAAAGAAATTTTCAATGCCATAACGAGCGTGTGCGATTAAAGCCAAAGATGATTTCCAGATG  
GAAATCACTGGCAAGGTATTAGATCC TAATTTTCGCACGGACTCTGTTGAGGGTCTACAGGAGT TTTGTTA  
AAAACTTAGTAGGATACTACATCATTATGGAAGGGATTTTCTTCTATAGTGGGT TTTGTGATGATCCTTTC  
CTTCCACAGACAAAATAAGATGATTGGTATTGGAGAACAATATCAATACATCTTAAGAGATGAGACAATC  
CACTTGAAC TTTGGTATTGATTTGATCAACGGGATAAAAGAAGAGA ACCCGGAGATTTGGACTCCAGAGT  
TACAGCAAGAAATTGTCGAATTAATTAAGCGAGCTGTCGATTTAGAAAT T GAGTATGCGCAAGACTGTCT  
CCCTAGAGGGATTTTGGGAT TGAGAGCTTCGATGTTTCATCGATTATGTGCAGCATATTGCAGACCGTCTGT  
TTGGAAA GAATCGGAT TAAAACCTATTTATCATAACGAAAAACCCATTCCTTGGATGAGCGAAACAATAG  
ACCTAATAAAGAGAAAAACTTCTTTGAAACAA GGGT TACAGAATATCAACATGCAGCAAGCTTAACTTG  
GTAGTCCGTGATATCAAAATAGGAGAAAGCCTCAACCATA GAGT TGAGGCTTTTTTTTGT CATAACGGCAAC  
CTGATAA GAATTTT TAGATTTTCAGGTTAGAAGTAAATGTATTT ACCCATGAAT TTTTTTTAATTTTCTC  
ATAATATCTTGTAGCCTTTTTATTAATGAAAAAGGCTAGTCACTCTCCTATGACTACTGTTAGAGT  
GTGAGGTTTGGGT TGGAGCAGGTGTAGCCTTTCGCATACGAAGTATTTTCTGTGAAACCACAAGATTT  
GAAACTTCCCTATTTTGGGAAGAACGCTCTCCTCAAATAGCAAACCATGTATTTTATGT ACCCAATTAC  
TATTC TCGATACGAA GAGT TTTGTAATGCCTACTTGGCAAGAGT TATTTGCTAATAATGGCCCTATTTGTT  
GTGAGT TATGCTCAGGGAATGGGGAT TGGGTAGTGAACAAGCAT TAAAAGATGCTTCCGTTAAT TGGAT  
TGCTGTTGAAAAACGTTTTGATC GGGTCCGTAAGATTTGGTCGAAAATGGGT AATTATCGCGT GAATAAT  
CTGCTTATTGTCTGTGGAGAAGCTCAAACCTTTTTTTCCATTATGTATCAGATGCATCGTTTCAAAAA  
TTGTAGTCAATTTCCAGATCC TTGGCCTAAGTTTCGGCATCGGAAACATCGGCTATTTCAAGATCTTTT  
CGTTCAAGACATGATGCGTACTCTAGTAGTTGGTGGGCAATTA ACTCTTGCAACAGACGATTATAACTAT  
CTGGTAAATGCGATTACAGTGATGTTGAAGTACCTTCTCCAGGTC TAAAGAGCCCTCATTACATCAATG  
TCAAAGACAATTACGGAGGATCC TGGTTGCAAAAATTTATGGAGATCTAAAGGACAGGAGATTTTCTGTAC  
GGAATTCATCAAGA GAGT TGGGAT ATAGCTGACTTGAACAGCTGACCTTACGATGTCAACGTGACGCTC  
TAACCAACTGAGCTAAT ACCCATGTGACTCGCATCC TTTATAAATGATGTGGGATCTTTTTTCAAGAGG  
CTTATGATGTTAACAGGGATAGATATACTTTTTTAGTAACATAATCAAGCTGTCTC ATTC TATTTTTTCGAC  
AGGTGGTTGAGCCAGGAGATACTATTGTTGATGCAACCTGTGGAAATGGTAAAAGATGCTTTGTTCTTGGC  
TCAGTTATTACGAGGGAAAGGTCGTTGGTTGTTTACGATATTC AACAAGAGGCTTTGGATCGAGCAACC

GCTAACTTTCAAAGCGGGTTATTAGCTGAGGAACGAGCGATTATTGAGATGAAGCTCTGTTACATGAAT  
ATCTTCAAGAGCAGGGAGCTAAGCTCTTTCATTATAATTTAGGATATTTGCCTAGCGGAGATAAGCAGAT  
TACTACATGTAGCGAGTCCACAGTTACCAGTATCTACAAAGCATTAGAATTAGTCGCTCCTTCAGGAATA  
GTCAGTGTGTTTGTATCCGTTGGGCATCAAGAAGGAGCCGCAAGGATATGTTGTGTGGAGCAAGTGGCTA  
CGGATCTAGATCCAGTATGTGGGAAGTATGCACCCACTATTCGTGTAATAGAAGGAATGCTCCTAGGTT  
ATTTCTTTTTTCGCAGACGACAAGGCTAGAGGCGAAAGGGGATGATACGGACTTCTTTATGTAAGGAAATA  
CCTTGTTTTTTTAAAGGTTTTTGAATGATCTCGATAAGCTCTAGGATGTCTGCGGTACAGGCATTTCCGG  
TATTAATAATGAAATFGCCATGTTTTTCAGATATCTGCCCGCCTCCTATCTTCAACCCTTTTAATCCAGC  
TCGATCAATAAGTGTCTCTGCAGACAAGCCTTCAAGGATCCGGAAGATACAGCCTGCGGAAAGGGTATTCG  
TAGGGTGTGTTTTAAGGTCGTTCTTCTATTAAAGCTTTAGCTCGTTTAGCAGCCTGAGGATCCTTAGTTA  
GCTGAAATGTGCTGAGGCAATAAAAAGCTGGTTTTTTTTGAAAAGGGGAAGTCCGATAGGAAAAAGAAG  
CTTTTCCCTAGGTATCGAAAGTAAAATTCCTGAATGGTCAATAATTTCTACGTTGATGAGAGAAGAGGCT  
GTGTTAGCTAGAGTAGTGCCAGCATTCATAAACACAGCTCCACCAACGGTTCCTGGATCCCTACGGCAA  
ATTCATATCCCGAAAATCCCTTGAGAAGAAAGCCTTCCCTAACAGAGCAAAGGAAGATCCTGAAAGGAC  
CTTGATTTGTGTATCCGAGAGGAACTCTTGTCCTTGGATATTATTATACAAAGACAAGGCCATCAAATCCCT  
TGATCATCAAAAAGGCAATTGGATCCTTTTCCAATAATAATATAGGGCAAGGGGTGGGTGTGGAGATAGG  
AAAAGACGGTTAAAGCCTCACTCAAAGAGGTTAATTCCTTAAAGTAGCGAGCAGGCCCTCCAATGCGAAA  
AGTGGAAAAGCGGCTTAATGGAACAGATTCCTTGAACAGAAAAAGGGAAAAGGTCATGGATATACA  
ATGCAAAAGTTGACTGTTCAAGGGAAGCGACACAAGCCCAAGATATCTTGGACGGAGTCGCTTCCCTTAC  
TCGTATTCATTAATGTGATAGATGGTAATGCTAAAAGATAAAAAATATAGGTATTTAACCACACATAGAAGT  
GGGCTCGAGAGGAGTATCTAAGGCTGGGGCTGGGTGGTCAAAAATAGAACCAAAACGGCAAAGGATAAGA  
GAACTTCCCTCCGAATAACTAAATTTTTTAATAAGGCAGTCTGTTCTGCTATTAGAACGGCTACAGGAA  
CAGGACAGCAATCTTGTTTTGTGATGCTCAAAGAGCATCATACGAAAGGATATTGCGTTCGATAATCGT  
TAAGCGAGCAAGAGTGTGGTTCGAATGGTGCATCGAGCAAAGCATCTAGATCAGGCTGGTTCGCTCGA  
ATGCTCGACAAAACATCAAGGCGTAAGCAGCATTCCTTTTTGAAACAGAAGCTTCGGTCATCAGCAGGC  
TAACGAGAAGATCCCTCCTTCTGGATCTATTTCCAGAGCGTATAGCGCCTGTAAAACGAGCTCGCGTAA  
TTTTTGCTTTGGGAAAGGTCGGCTCGCGCAACAGGGGCACAAGCTTTGTGAGAAGCCATTACTGACATG  
ATCACACCTAAAAAGAGTACAACGCTATGCGCCCTGTAATACGAAGGCTCAGCCTTTCCTCCTTTCTTA  
GGGCGCCAAAATGGAAGGAAGGCCCGGAGTATATATGAGTCATTATTTTTATGAAAGAGCGGACCTGCTT  
ACCAGGGCGATCGAGGTTTTTTTTGAAATAAAAAAATGTTTTGTATGAAGGTTCAAAGGCTACACAT  
TTCTTCTTATGGAAGAAGGAGTGAAGTTTTAGGCGCAATACTTGATAATAATCCCTCATCTATAGGTACCA  
TGTAGAGTCTAGAGCGGAGGCGTCTAGATTATGTCGCAGGATGCGAAAGATTGTTTAGACCAGAAGGAGA  
AATCCCTCTTCTGGGGAAGGGTGGCTTGTGGTTTTTTTTTAGGCTCTCCGTCAGCGATTACTAATTTTAG  
CAGGGTAGATGTGGCTTTAAACCTAAAGATAAATAGGCAGATACGAGCTCCTAGGGTACGTGTAATAGGT  
TCCGCAAGGAGAGCAGCTAGGCATATTTAGTATAAAAAGAGGCCCTAGATTTAGCCAAGGAAGCTGATTTAG  
ACCTTGTGAGGTTGCTTCAAACCTCAGAGCCTCCTGTGTGCAAAAATCATGGACTACGGGAAGTATCGTTA  
CGACATAACTAAAAAGAAAAAGATAGTAAGAAAGCACAGCACCAAGTGCATCAAAGAGGTTAAGCTT  
AAGCCTAATATCGATGATAACGACTTCTTACGAAAGCAAAGCAAGCTAGAGCCTTTATTGAGAAAGGAA  
ATAAAGTAAAGGTTCTTGTATGTTTCGGGGGCGAGAGTTGGCTTATCCCGAACACGGGCATAAGGTTGT  
TCAAAAGATGTGTCAGGCTTAGAGGACATAGGTTTTGTTGAGTCAGAGCCTAAACTGAATGGCCGTTCT  
TTGATCTGTGTTATTGCTCCGGGAACACTAAAAACTAAGAAAAACAGGAAAAAGTCCATGCCCAAGATG  
AAAAGCAATAAGTCCGTTGCGGGCGGTTTTCAAATGACTGGTTCTGGTCAATTAAGAAAGAACTCGTCCGG  
GGAAAAGACACAAATTAATCAAAAAGATCTTCGCAACAGAAACGCAACCTGTCTAACAGCCTTTAGTGA  
TCAAGGTCAGGTGGGCATGTATAAGCGAATGATGCTCGTTTAAAGATAGAGGGTTTTAGATATGGTAAGA  
GCAACTGGTTCAGTAGCTTCTAGATCGCGTCTGTAACGCGTTTTTAAACAAGCAAAAAGGATTCGTTGGGAG  
ATAGAAAGGGACACTTTCGTCAAAGCCGGTCTCTGTTATGCGGGCTATGGCTTTTAACTACATGCACCG  
AAAAGATCGTAAAGGTGATTTTCGAAGCCTTTGGATCACTCGTTTGAATGTGGCTTCCAGAAATTCATGA  
TTGTCTTACAGCCGTTGATCAATGGTCTCAAACAAGCTGGTATTCATTTAAATAGAAAAATGTTGTCTG  
AGATGGCTATTCATGACCCCTCAAAGGTTGCTGTAGTAGCTACTCAAGCTAAACTCGCTTTGGAAGCAGC  
TGTTCAAGGATAGAGTTTTATGACAATTCAGAGGAACTTGAGGCTGTTAAACAGCAGTTTAGTTGTGAT  
GTAAGCCTTGCGCATTCCTTCAAAGATCTTTTCGATGTGAAAGTAAAATACCTGGGAAAGAAGGGAATCT  
TTCGCGGTTTTGCTGATCAGTTGAGGAAGTGCCCTATAGAGCAGAAAGCGACTGTTGGCGCTTCCATTAA  
CGCTTGAAGCAATACGTGGAGGAAGTTTTACTCGAGAGAGGCAAGGCCGTTTTGGCTAAAGAAGAAGCA



GAA**GAGT**TCCTTAAGGAGAAGATAGATATCAGTTTACCTGGTAGCGAAGAAGCTGCTCTTGGTGGTAAGC  
ATGTTATCAAGAAAGTCCTTGATGATGTTGTAGATATCTTTGTTTCGCTTT**GGAT**TTTGTGTTTCGGGAAGC  
TCCTAATATCGAAAGTGAAAAACAATTTTTCTCTTCTTAATTTTCGAAGAAGATC**ATCC**TGCTCGACAG  
ATGCA**GGAT**ACTTTCTATTT**GGATCC**CACCACGGTCTTGCCTACGCACACGTC**GAAT**GTGCAGTCTCGG**G**  
**AGT**TAGCGAGAAACAAACCTCCTGTTA**GAAT**TGTCGCTCCAGGA**GAGT**GTTTCCGTAATGAAGACGTTTC  
TGCGGTTTCGCATGTGATTTTTACCAAGTAGAGGCTTTCTGCGTAGATAAAGATATTTCTTTTTTCAGAC  
TTGACATCGATGTTGGCA**GGGT**TTTACCATATCTTCTTTGGACGCAAAGTG**GAGT**TGCGGTTTAGACACA  
GCTATTTCCCTTTTGTGAGCCAG**GGAT**CGAGGTAGACATTTCTTGT**GAAT**GTGCATGGAGCC**GGAT**GTTTC  
TTTTGTGTAAGC**ATTC**TGGTTGGTTGGAAGTTGCTGGAGCAG**GAAT**GATTCATCC**GAAT**GTCTTGCCTAAG  
GCAAGCTTTGATCCAGAA**GAGTATTC**T**GGGT**ATGCCTTGGGGAT**GGGT**ATAGAGCGTCTCGCGATGCTCA  
AGTATGGTATTTCCGAT**ATTC**GATTGTTTAGTGAGAACCATTTGCGGTTTTTACGGCAATTTTCTTAAGG  
AA**GAAT**GGCAGAGCGGTTAATGCACCTGTCTTGA AACAGGAGACCTGAAA**GGGT**CCGGGGTTC**GAAT**  
**CC**CTCTTCTCCG**ATTC**CTTTTTACGAGAACCTTTT**GGGT**AA**GAGT**TGAGGCTCTTCTCTGA**GGGT**  
TTTTTTTGTCTTAGTTATTTTGTATAAGCAAAAATAAGCGCTTATAATTTCTTTTTATTTAGTTTTTTAT  
AAAATAAAATATTTGAAAGCTAATTTATTTATAAAAATAAACTAGAAGACAATCTTGAATAATAAAAAAGA  
CTATTTTTTCACTAGCTCTCGGGGAGGCATGGAAAAG**ACTC**GTAAGTTTGAAAAAGCTTTAGAA**GAAT**TTA  
GAGCAGTTAAAAAAGATTTCTTACGATT**ATTC**CAGTGGGAACGCTGAGGCATCGTCTCACAACAAGGCTC  
TCTCAGAAATGAAGAAGGCTATGCATTATATAGATCACTATTTCAAGCAAGCAGGAGCTCTCTCTCAAAA  
AGATGTAGATAAAGTGATTAAGAGACAGACTTTTTGATTGCTG**GAGT**GCAG**GGAT**GTCTTTTCTTTTCTA  
GAG**GGAT**CGTAAAGAAGAGGTGTACCGTCTCTGTCTCAAGATTATCGTCATCTGAACCACACTTATGATG  
TAA**CTC**GTGAACATCT**GAAT**AATAAGATGGTAGAGCCAAAAGAAATACTAAATGGCTCTTTAGAGA**ACTG**  
CCAG**GGAT**CGAGAG**GAAT**TTCTTAATAACCTTGTGCAAGTAAAACG**GGAT**CGTTCTTATGA**ACT****ATTC**TAC  
ATGGCAAATGAAGATAATAAGCGGTTTTATACCGATGCTTTAGCGCAAATTATCTATAAGCAAGGAAGA  
**TCC**AT**GAGT**CGATGCATGAAAATG**ATCC**CTTAACGAAAACAATTTGTGT**GAAT**AGTGATGAGATCACGAA  
ATTAGCTTCTTCCCTAGTTTACAC**GAAT**GATATGCCA**ATTC**GGTTGTTTTATCAAAAAGCTCTTAC**GAAT**  
AT**GAGT**GCC**GAAT**TGACGGT**GAAT**GTACATAACGCATTGATGGCTTTGTTTTTAGCTCGTTATGAAGCTA  
CAGCAGT**GAGT**CAGCAACCTAGAAAAGAAAATCTCAGTTATTTAATGACTTTTTGCATTTTCTAAGAAA  
AGCTGCAGCGCTTTT**GAAT**GAAAAGATCTTCTTGATTTACAAGAAAAC**ATTC**GAAATCACTAGT**ATCC**  
TCATTGAGCGCTAAATATATGATCACACTATTGATTTTTGTAGAAGCTGCTAACTATATTTTCTTAAATA  
TCTCTTGCAAACTTCAGCCAGAAGAAGGAAAAGCCTTTATCTGCAGGACAGTATGTTGCTGAAATTTA  
TGAT**GAGT**TACATCGATTGTTCTCCAAT**ATCC**TAATGGGCCATT**ATTC**AAAGCTATAGATA**GAAT**GCTT  
G**ACCC**ATACTTGA**AGT**TTT**ATCC**CATTTTATTAGGC**ATTC**TCCCATGCCTGAAGGTAAGCTTATAC  
AAGGAGATAAGGAGATCAAAGTACTTCGTACACCAAGCCCTGTTTCGCAAAGCTCT**ATCC**TTTATGCTAA  
CTGTAATGGAG**AGT**TCTTACACTTCTAGATGCGAAAACATGTCAGGGAGACAAGATTTTGGTAATCAAT  
**ATTC****GAAT**CGGTTGTGCGGAAAAGATCGTGCGAGAAGTGCATTTATTGAA**GAAT**CTTTGCAAGATT**ACT**  
**CT**TCTGTGTATAT**GAGT**GCATTTCCAGAACCAGAAGATTTTTTGTAT**GGAT**TGGAGCAAGTGCATGGG**GA**  
**AT**TAGAAACGTTTGC**GGAT**TTCTTTTCTCTCGTACAGCA**GAAT**TTTTCAAACCTAAAGCCAA**GGAT**AC  
TGTGTTCTTCCAGAAGAAATGAAAGAGCGTATGG**GAGT**GTTCTTAGAAGGTATTGTTCTTCTTTGAAGA  
ACGTTTTCTTCTCAAAGAAAAAATCTT**ATTC**AAAAATGATAAAGTTTTGCTTCTACATTTAATCTATTA  
CTTTGTTGTTTTTAATCTGATTGAGCAATT**GGATCC**TAATACGTTAGTAATTATGTCCAAAGAT**GGGT**TA  
GATTATGCATCTGTCTTTGTTTCCGGTTTTGC**ATTC**TTTGA AAAATCGAGGAAAT**GGAT**GAAGACAGTT  
TGAAGC**GAAT**GGTTGCTA**GAAT**GTTAGCTCCACATTAGTAGCCAGAGATCGGCTAGTATTTGCTCAACA  
TGTGGA**ACT**ATT**GAGT**AAGTTTTT**GAAT**TGTTTAAGAAAAAATCGCCACAATCTAAAAGACCTGAGAACG  
CTCTTTTCCCTATGATTTAGAG**GGGT**GGCA**ATTC**TCAGGTATTTAAGCAAGTTTTTCGATAAGCATAAA**GGG**  
**TAAT**AAAAGCATAAAGCCTGCAG**GAAT**AAACATCACCTGGAGAGCCGGTAAGACGCTATTGTTAGCGAG  
AACC**ATTC**CAGCTTTCAGAACAACAAAGAAAATATTAATGGTTCCAGAGGGACTAGATATGCCCAAGTA  
ATTTTGGGGAGCCGATGAAAACGTAAGCAAAGATGGGCAGACA**GGAT**CACAGCTGCGATACATAATAGTG  
GCGAGATGAGCATATAGTAAAATAAGGTAAGCAAAGATA**GGATCC**TTTGAGGCACTGTAGTTAATAGCCC  
AAATTTGCGTGCATGCCAAG**GAAT**GGCTTGTA AAAATGCAGAGAACTACAATCTTCTTCTGTTATGAAA  
ATCTTGGAGAAA**GGGT**TGTCGTAATAGCT**GAATTC**CA**ATTC**AGG**GAATTC**TTTCATGTCAAAGA**ACTGTG**  
TCAAAGACACTTCGTGATTTTTCATCTTCGGAAAAATAGGACACTTCAAGCCGATAGGAAGCGAT**GAGT**  
AGTAAATGCAAGTTTTTTGATTGCATAGATCGTTTTAGGCCCTTTA**ATCC**AAAACACGTTATTTA**GAGTA**  
GCGGCTCTGCGATTAATGGAAGAAAAAATAAGAACAGTTTGGTCTTTCAGATAGAGCGCAG**GGAT**TTTTT

CTTGGGCTTTTTCTAAAGTGCCTTTGTCCATATGCTCTTTAGTTACCGAAATCTTTTCACAAATCGGATG  
GAGCCATTGGAAATTCGCATACAGAAGAAAGGTAAATTAGGGAAC TAGATATAACTAGTGGACGAATCAAA  
GTTTTAGGGAAAGCCCTGAAGCTGCAGTAATAGAATTTCTCTTTTGTCTGCATGGAAAATAGTGTAA  
TTGTGCAAGCAATTGCAACGAGTTGAGGGAGAATGAATTCGCTTTTAGAGAGATTTGAGAGAGATAGTA  
AAGCAGAGAAAGCTGCAGAGGAGCTCCGGCAATCGCTGTTTTCCCTTCTCGAAAGCATGTAGTGAATGA  
TGAATAGAGGCGTAAAATATAACCGCTAGGAAAAATAAAGAAGAGAGCGAAATCCAAAAGCGAGAAAGAA  
GATAGCGTTTCCAGATAACCATATCTATGCATGCCCTTGATTTTTCAGTGTATATTC TCCAAGAAAAATA  
AGCCATGAGAGGAGCTGTGGAAAGAGAAACAGCATTACAGCTGAAATTTGGATGGATAGTATTTTTCCCTA  
CGATAAGGAAAAATAAGATTCAGTATAGGGAATAAGGCATAAATTAGCACGGGCTTGCAGAAACGTGGCTT  
ATAAGTTCCTAGGGCTAATCCAGAGAAAGTCATAGTACTACATAATAGGCCGATAGCAATTCACGGAGT  
ATTTCTGCTAAATGCAAACGAGCATCTTGGATTAAGTGTTCCTCAAGGCAATAGTCTGTACGAGT TTTCA  
TATACGATTTCCAGCGAATAGCGTGGCTGTAATTTTCGGAATAAGGAATTCATCCAGAGT TTTCTAGATA  
GAATCTGTTGGGATTAGATGTGCGAGCCTCTGAAAAGAGAGGGATTTTGGAAATGACTAGGACATTTTTTC  
GCCTGAACA GAATCTTTATCCACATCAGGAATAATCGTCTCAATGAAACCAATATTTGGATATCTCTTGAT  
TGTGTTTTAAAGCAATAATTACATTTGTCAAATTTACTTTTTCCACAGTGATCTATCGCAATGAATATGCG  
ATCGTTTTCTTTTTCTGCAAGGTTTGTAAACAAAAGTGCCGGGGATGTCATAGCGATATTTGCGATTGCT  
TTCCCTGTTTGAAGCGGCAATCGAAGCTAATCCGGAACATGTATAGAAATTTGAAGCAACATAATCTC  
CTGAAGCAATCAAAACAGGGAAGATAATCATTCTTGAGAAGCTCCAGAAGCTTTTAAAAAGGTAATTTG  
GTTATTATCGGAGAGTTTACGAAAATAAGGTAAAGGCCGAGATAAAGCAAGATGCTGGGAGTATAAAGGGA  
AGGAGATAGGGAATTTGGTAGGCAGTGACTTTAAAAACTGTGCGATAAGGAACATCTTTAGCAATATAAC  
TGACAATTTCTTTCAGAGAACTGATGATAGAAATGCAGATTAGGCTAAGCGTACAGAAAACGTGGTTTTT  
TAAATAACGAAAATAAGAACTTTCCATA GAATAGGCATGATGATTCGTAATAGAAAATCAGTTGAACG  
TTTTAGCTAACAAAACCTATGCGCATAGAAAATTTGTGTAATCTGTGGATAGTTAAGAACGATGCTATGA  
TAACCCGTTTTATTTGA GAATGATAAGCAATTAGAAGTTTTTTTTTTCTTTCTTTAGACAAGAAAAAAAATA  
CTTGCTAGCTCTGTCTGGAGGTAGCGATTC TTTGTTTTTGTATGACTTGCTTAAGTCTCGAGCCATTTTC  
TTTACTGCTGTGCATGTTGATTATGGATGGCGAGAGACTTCTTATCAGGAAGCAAGTGATTTAGCTGCTT  
TATGTGAACAAGAGCAGATCCCATTTATTTTAGATCGTCCGGAAGCTACAGATCC TATGGATTC TCGTGA  
TATAGA GAATGCAGCGCAGCCTATCGTTATGAAT TATTCATCGTTATGCAAAGAAAAGTGC TTTTCA  
GGGTCTTTCTTGGT CATCATGCGGATGACCAAGCAGAAAACGATTC TAAAACGGGTATTCGAAGGTGCC  
ATCTAGGGAATCTTAAAGGAATGTCTGCACAGGTGATGTACAGAGACGTTGCCTTATTGCGTCC TTTATT  
ACACATTCCTAAGCATAAGATTGTAGAAGCTCTTGATAGTACCAAGTTCAATATGTTCAAGATATCACA  
AATTGTAATGAGCGATTTTTGCGTGCAC GAATGAGAGAGCGCTTATTTCTTATTACAAGATGTTTTCG  
GGAAAAATATAAGGGACCC TTTGCTTTTCATTAGCAGGAGATTC TCGGAGCTGAGA GAATATTTGGATCA  
GCAAACAGCTCCTTTTTGTTACGAGTCTGATAATGAGAGAGGGAAATTTGTTACCTATAGAGCAAGAG  
TTACTAAAAACACCGTTTTTAGCTAAATGGGTATGCAAACAGTTTTTCTGAAACGAAGGACTAGTTGCTT  
CAAAAAGTTTTTACAAACGGTTTATGATCATCTTATGACAGGCTCTACAGCAAGATTACGGCTTCGTAA  
TCGAACAGTTTTGGTAAAAGCTAGGGGAGTAATCATAGAAAAGTATATATTGATAGTGTTTTTGGGGCTTC  
CCTAGTGGGTT CAGCAGATTGCTGAAAGAAAAACACTTCTGTTTTTTATCTCTATAAATTAGAGTTTTAT  
AAACAAAATAATAAAATATTTTGATATATTGAATAATTATCTGCCTGTTTGATTAGCATTGTAGT GAGTT  
TTATGGCTAAAGATAAAAAACAAATCCAGAATCCAAAAAAGTTTTTCTACTGCTTTTTTTCTTTCTCTT  
GTTTCGAGTGATTTTTGGCGTAGTCACAGTTCAAAAC TTTTTCTCTGCTAAAAAGGCTTCGGTAGGCTTC  
AGTCATCAACTCGAACATCTTGTTAACCTGAAATTTACTCATTC CAGAAGAGAGT CGCAAGACTGCCTTGA  
ACGATAATTTAGTGTCAATTTAGTGGTCTTTCCGCGAGGTGGTCCCTGCTGAAGGTCAGGTTCCGGTATCA  
ATATCTTGATCTTATTTGAACGTAAGCATCAGATCGACTTTGAGCTGGAAGAGGC GAGTAAAGTCTTTAACG  
GTTTTATCAAAAAGAGTGCCTAATGCGATCACTGGTTTTTCAGCTATTTCTGGAATGCCTATCCCTGAAG  
CAGGCTATACTATTTCTCCTCGAACGGATGTTGGGCTCTCTGTTTTAGAACCTTTAGTGGTTTACGGCCC  
TGATAGTCTCAAATTTGTGAACCTGCTGCGCTAGAAAATC GGGT GCGCTCTTTGCCTAAATCTACAGAA  
AGTCTTAGAGTTTTTGGTTCGGATCTCTATGCATTAATTGGGAAATATCTTTCTCCAGCTCTTGGTATCG  
GGTCTGAATCC TTAaaaaaAGAAATCAAAGATTTGCATCAGCAAGTAGAAAACCTCCTTAACTCAGGTTAT  
AGAAGGGGATCAGGCTGTTGCTTTGTATAAAACTGTGCTTGAGACGTTGCATAGAATTTCTTATAGCACTA  
GTTTTCTCCTGAAGAAGGGACTCGTTTCCATCAATTACGCTCTGTACGTCTATATCGTGAAGATTTCAACC  
GATGTGTCAAATTTAAGGGAGAGTGATGAGACTCAGGTGCAGCTCGATAAGTTGAGAGGC GAATTAGT  
CCAAGCTGTTTTGGTATTTCAATAACCAAGAACTCTTTCTCGAGCTTTGGAGAAACAAGATCC TGAAGTG

TTTAGTCGTTGGTTTGAAGGCGCTAAACAGGAATGGGCAGCATTCCTTTCAAATAAATCTTTATCATTTA  
GAGCTCCAGATCAACCGCGTAATTTAGTTTTAGAGAAGACTTTCAGAAGTGAAGAGCCAACGCCTCATT  
CTCTGGTTATTTATTCACTTTTATGCCAATTATTTGGTTCTGCTGTTTTATCTACTTTATCTTTCTCGT  
CAGGTCAAAGGGATGAACGGTTCTGCTATGTCGTTCCGAAAATCTCCTGCGCGCTTGTAGCAAAAGGAC  
AAAACAAGTAACTTTTGC GGATGTAGCAGGGATAGAGGAAGCCAAAGAAGAACTCGTTGAGATCGTAGA  
TTTCTTGAA GAATCC TACTAAATTTACTAGTTTAGGAGGGCGTATCCCTAAAG GAATTC TTTCTCATAGGA  
GCTCCAGGGACAGGAAAACATTGATAGCTAAGGCTGTCGCTGGTGAGGCTGATCGACCTTTCTTCTCCA  
TAGCCGGTTCTGATTTCTGTTGAAATGTTTTGTTG GGGT TGGAGCAAGTA GAATCC GAGATATGTTGAGCA  
GGCGAAGCGTAATGTCCTTGCATTATCTTCATTGATGAAATCGACGCAGTTGGAAGACATCGTGGTGCT  
GGTATTGGAGGTGGTCATGACGAGAGAGAGCAGACTCTAAACCAGCTGTTAGTAGAAAT GGAT GGTTTTG  
GTACTAACGAAG GAGT CATCC TTATGGCTGCTACCAACCGGCC GGAT GTTTTGGACAAGGCTTTGTTGCG  
TCCAGGACGTTTTGACCGTCTGTTGTTGT GAAT CTTCCTGATATAAAAGGTCGTTTTGAAATTC TCGCT  
GTCCACGCCAAACGCATTAAGCTAG ATCC TACTGTAGATCTTATGGCGGTTGCGCGTAGC ACTC CAGGAG  
CTTCAGGAGCTGATTTGGAAAATCTTCTTAACGAAGCAGCATTATTGGCTGCTAGAAAAGATCGTACAGC  
GGTGACAGCAGTTGAAGTTGCAGAAGCTCGAGACAAGGTTCTGTATGGTAAAGAACGTCGTAGTTTAGAG  
ATGGATGCTCAAGAGAAAAAACAACGGCATAACCAC GAGT CAGGGCATGCTATTGTAGGGCTTTGTGTTG  
AGCATTCGGATCC TGTAGATAAGGTGACGATT ATTC CAAGAGGCTTATCTTTAGGAGCCACGCATTTCCCT  
TCCAGAAAAAATAAATTAAGCTACTGGAAGAAAGAGCTTTATGATCAGTTAGCGGTTCTTATGGGAGGC  
CGTGCTGCTGAACAGATTTTTCTCGGTGATGTTTCTAGTGGAGCGCAACAAGATATTGCTCAGGCAACAA  
AGATTGTACGGAGCATGATTTGT GAATGGGGAAT GAGCGATCATTTAGGAACTGTAGCTTATGACGAGCA  
TTC CGAAGCGGCTCCTACAGGATACGGATCC TACCATGAAAAAAT ACTC TGAAGAGACGGCCAAAGTT  
ATTGATAATGAACTTAAA ACTC TATT GGAT GCTGCATATCAAAGAGCTTTGGACATCATCAACAGTCATA  
AAGAA GAGT TAGAGCTTATGACACAGATGTTGATA GAATTC GAGACTTT GGATTC TAAAGATGTTAAGA  
AATCATGGACC ATTC TTGGAT GCTGATAAGAAACGGGCTCGTATGAAGGAAGAAGGCATGCTGTATAAG  
AAGATTTCTGAAGATCTTCCACCGCCGCTCCTCAAGAAAATGTGCAAGATGGGAC GAGT TTGAAGTTTA  
ATACTAGCACATAACTTCCCTTCTGGAGGTTTAGGAGAGAGCCCTTTTATTAGGGCTCTCTTTTTTTTTGT  
GTGTGAGGAAAGCTAGCGTCTAACTAAATGTCTCTAAGTAAGGAT GTTTGTAGGGGAAATAGCGATTTTC  
AGTGTGAGAAGCTTAGTTACAAGACAATAAAAAAGGCTAAGAAAAACCTTTCTTAGCCTTGTTTTCAA  
CGAATCGCCTATAGAAGACTAATCTTCCAGCGTTGCCTTATGGCTCAGCTTCAACTGGCCTTTTTCGTTA  
ATGCTAAG GAGT TTAACAGCAAGCTTGTCTCCTTCTTTGACAAAGTCAGAGATATTGTCTACTTTTTGTT  
TAGACA ATTC AGAAATATGACAGAGCCCTTCTTTTCTGGGAGGACTTCTAC GAATACTC CAAATGTTGC  
GATAGATGTAACACGGCATTATAAATTTACCGACTTCAACTTCTCCAGTTAATCC TTCGATAAGTTCT  
TTAGCTTTGTTAATCG ATTC TTGGGT GCTTGTCTGCTATGTTAATGACGCCGTCATCATTGATGTCAACT  
GCGCACCAGAACGCTCGATAAATTTGAC GGAT TTGTTTTCTCCGGACCAATGACCGTTGCGATTTTTGA  
GGTATTGATCTGCATAGTTTCAATGCGCGGAGCATATTTAGAAACAGTTCCCTTAGGGGAGGCCAGAAT  
TGTGTCATAAGATTAA GGAT ATGACTACGCCCTGTTTAGCTTGCCTAGAGCTTGCCTCATAATCTTAT  
GAGT GATTC CCTCTATCTTGAT ATCC ATTTGGAAAGCTGTAATACCTTTAGCTGTTCCGGCTACTTTAAA  
GTCCATATCTCCTAGATGATCTTCTATGCCGAAAATATCAGACAAGATGATGGCTTGATCTCGATCTAAG  
ATTAAGCCCATAGCAATACCTGCCACGGGAGCTTTGATAGGA ACTC CTGCATCC AT GAGT GCAAGACAGC  
CTCCACATACGGAT GCCATGGAGGAAG ATCC ATTAG ACTC AGTAATATTAGATTC TAGGCGAAT GATATA  
AGG GAAT CGTGATGTC CAGGAAGAACATGACTTAAAGCTTTCTCAGCTAATTTCCCATGTCCAATTTCA  
CGTCTTCTGGGGAACCA ATTC TGCCAACTTCTCTACGGAGAAAGGAGGGAAGAAATACTGTAGATAGA  
AGCGAGCGGCTCCATCTCC ATTC AGATCTTCAAT CGCTGCGCCATATTTTCGCC TCCAAGCGTACATAC  
GGCCATGCTTTGCGTCTCTCCGC GAGT AAATAAGCAACTTCCGTGTGTTCTTGGAAAGCAAAG GAGT CTCT  
ATGGAAATGGGGC GAAT CTCTGTGGTGGTTTCGTCCATCTACAC GAAT ACCAAGATCTT GGAT AAGAGCTC  
GCATTTGATTAGATTTTGCTGTCTTAAATGCAGCCTTAAAGTTCAACAAGAAAAATCACTGTTTTCTTC  
TTGAACCAAGTTAGCAATAAC GGATTC CTCTAATTC TTTTCGAGGCTTGTCTAGAGCTTCTTTATCTCTA  
AAAGACAATGCTTTTTTCAATTTTTCTCTAATAAAAATCTGAAACTACATTTTGTACGTCTTCTGGCATAT  
CAAGAACGGCAGAGAAGTTCTTTTTGTTTGGCCGATAGCTTTCTGCCATGCTTCAATAGCATCGCATATTT  
AGCTATATAGGTTTGCCAAAAGCAATAGCTTCTAGAACTTGCTCTTCTGTTAAAAAGTCGCAATGTCCCT  
TCAATCATTA AAACTGCAGAAGCTGTTCCCTGCCATGACGAG ATCC AGCTTGGAGGCACTTAACTC ATCTC  
TGGTT GGGT TAATG ACCC ACTTTTCTCCGACGAGCCCAACGCGTAC ACCC GCAATGATACAATTTTGAGG  
AACCTCTGAGATAGCTAAAGCGGCAGAAGCTCCGCAATAGCTAGAGGAT CAGGTAAGTTTTCCCGTGC

TAAGACCAAACGTAGGACAAGACTTGAATATCTTGCATGAGTCTATTAGGAAACGACGGACGCAAAGAGC  
GATCTATTAGCCGAGAAACAAGAATTTCTCTCTCGGAAGGCCGTCCTTACGTTTTAGAAATCC TCCAGA  
GGTCTTCCCTGCGGAGGAAAACCTTCTCTTGATAGTCTACTCTGAAAGGCAGAAAACCGACAGCCTCTGAC  
AAGGAGGCTGCACACGCTGAAGAAAAACCC AAGTCTCGTTCATTTTGACGAGAACAGCCCCACTGGCCT  
GGCGAGCTATTTTCCCTGTCTCGAAAATTAATGTTTTATCTTTGTCTAACGCAACAGAAAAAGTCTCAA  
AGCCATGGAGTTGTCTAAAAACGAAAAGGGTACTATTTTCTCAAATTGAGGCGAGCAATTAATTTTT  
ATATCTTTCAGTATCAGTAGAATTTAAGTACTCTAGGAGCTTTCTCTCTGCCCTACTAATTTTAGCAA  
GCTAGACGA GAATTTTGATCTTTAGGAGATCTTTTAAGGTGCTCCTT GAGTTCGGTTATGTGCTCAGTCA  
GAATAGCAATCTGCACATCTGCCGAACCTGTGTCTTTTTTCATGAAGTTGAAATTTTTTAGTAATTTCTTC  
TTTAGTGCCCTTATCCAAAGACATTCGATGTCTCCTTAAATACAAAAAATGCCGTAATGACCAATTATAC  
CTAAGAGTTTTGTTAATGTACATCTTTTGCTAGAGT AAGAAGTTTTTTTTCTCTGTGCAGAGAAATATA  
GATGTCGATTAGGTACTTTGTAGTATGTTATGAGGGGTTTTTGATTTAGAAAAAATCAAATAATTC TTA  
ATGCAAGAAAACCTTTTTTATCGGGT TATAGCTAATTTTATGTGTATAGAAAAAGATTTATTTTTTCATGA  
AGAAGGCTCTAGATGAGGCTAGGAAGGCATATGAACAAGATGAAGTCCCTGTTGGTTGTATCATCGTTCA  
TGGAGATAAGATCATCGCTAGAGGACATAATAGTGTGAGCAATTAAGATCC GACAGCACATGCTGAA  
ATGATTTGTATTAGTGCAGCAGCA GAATATCTAGA GAATGGAGATTGAAAGACAGATCC TCTACTGTA  
CTTTAGAGCCCTGTCTCATGTGTGCTGGAGCGATTCAGTTAGCACGTATTCCTA GAATTTGTTGGGGGC  
CCCTGATTTGCGTTTAGGAGCTGGAGGGAGTTGGTTAAATGTTTTTTTTAGAAAAACATCC TTTCCATCAA  
GTA GAGTGTGTTCTGGTGTGTTGTACCAAGAGTCTGAGCAGTTAATGAAAACTTTTTTTTTAGAGAAGA  
GAAAGGCTAAGGATGAAGGAAGAAATTC TCGCGCTACTTGTATCATTTATATACGGAGCAGGAAAAGCGAT  
TAATGTCGCTAGGGACGACGATTGTTCC TGGATGACGAAAGA GGATCTTTTACAGCCTATGGATTATGA  
TGAAC TTGAGGAGA ACCCTTCTTTTAGATTTGAAGAAGGAGT TTTGAATGGAATAGGAGAGACTC GAGCC  
GCATTATATTC TTTTTTTCTGATCTAGAAGACTCCTTTTTCGCTG GAGTCTTCTAGCGATACGAGCCTCT  
GTAAGGATTAGGAATATTTTTCTTATAGCAAAAACATATTGCCAAAGCCATAGACAGTACCGAACCAAGT  
AGGAT TGCATAGGCGCCGGACAGAAT CAGAAT TAGGAAGTAGAAATGGAGGAGT AGAACAAAGCTCCATT  
TTCTAGATAAAGAGATAGGGAAAAGAGG GAGTGTCTGCTTTTTTCT GGATCTAGGAAAACGCGGACAAT  
CAAAAGAGCGCAGATTAACCTTTCTGGTCCGAAGAAAGCTTGGGTGCTTCCAATTAACCATAGAAAGGCC  
CAATGCTGATACCTGCAATACTGACTTGGGTAGT GAGTAAAAACACAAAGCTACCTGTTCC GAGT TTTCC  
GAATAATTACATCTGTTGCTTTATAAAAAGAGGATGAAATCCAAAACATTC CGCAT GAGTAGGCGTTGCGT  
GATCTCAAGGCTGCGAAGATCC CCCAGCTTTAAGGTATCTGCTGTTACGAGAGGATAGGTGAGCCATTGC  
CAAAAATAATGTTGAT GAATTCCTTTTACAGAGAGAGCGAGCCATTC TATAGGCCACGCACTTGAAAA  
AATACTGTAAGAAAAATGCGATGAAAGGAGCGGAGCAAGAAGTTACTAGTACTAGAAGGGGAAGCTGTTT  
TAGGGCTTTCCCAAAAAGG GAGT TTTGTTGTACTTATCGGGGAAGATAACTC TCATGAAGGAGAGGCCCT  
TTTTACAAAAGTGTGATGATTGGCTCTATTATCTAGGCTCTGTTTTTGGCTGTCAACCTTCTTTTGTCT  
TCGCAAGGTTTGTATTT GGGTGCATAGGAAAACCTGTGC ACCCAAGATATTAGTCCGAAGGAGACGTT  
GTAAGGTTTGC TTTAATCGTTAGATCGATGAGAGAGGTAAGGAGCGCGGAAACTGCTTGAA GAAT TTTCA  
TAGATTC TGTGGATGTGGCGTTACCGATTTTTGGTTAGCTTGAGCACGTTGTTGAGCTGCGGACAGTTC  
CTGTTGGATGAGT TCTCTATTTGCTGTAATCTGTTGGTTGATGTTGAAAAGCCT GAATAGTGTGTGA  
TTCGTGTATTCGTCTCAGAGCCATTTTTTTTTGATTAGGTCAGGAACATATAACAAGGGGATGTTGATTA  
GTTCTTTGGTTTTTCTTTGTTGTTCCAGCGTATTTTCTTGTAAAGACAGCCATAATAGCATGGCTGTAATC  
TGTCGTTGCGACGGA GAGT TTTAGCATGACTGCAATGCAGAAATACATAGCAGACTTTTTGTTAATCTCT  
ATGGATGTAGGCTCTATTAGAGTAGAGTCTGGTATGACAGTATTTTTTTT CAGGAA GAGTGGGGATGATTG  
CACTACTCATTGGATACCCCTTTTAGATATTCGCGATCAAGCTAACGATTTGTGAGAACGTTT GAATGAG  
CGCTGACCGACTTGTAGGACTGTTGAATAATATATTATTCGTGTTCAAGTTACTGGAAATCACTTGA  
GAAGCATTTC AAGACCAGATATTTGGTTTT GAATCGCTTGCTTAGATGCTCCGACTGCTTGGTTAACCG  
ATTGTACGTTTTGTAAATAAGAG GAGTTTTGAGAGT TACTTGGTTTTTTG GAATGGTAGTGTATTGGTA  
TAGCGCTTCTTCATGTTTCAG GAATGTTTGCGCGGCAGCATTAGCTTGCAATTGCTCTGCAACTAGAGAC  
AAGTTATTTGCGCGACGAGAACAGACTGGTAAATGTAGTAAACAGTAACGATGAGA GGGTTAGAAATCCCT  
TAGCAAATCGTGTTATAATCTCATCAGCCGTTGCA GAGTTCGTTGTTCCCTGTAACCGGAGGTGTTTCAGC  
TAGCTGTAATACAGCATACTGGTCTTTATGCCACATACTTCTGCCTCGAAT TAGTTTTCTT GGGT TAA  
GACAG GGGT TTTATTTAATTGGTTAACTGTGCTTCCCACG GAGT TCAATGTTTTGATGAAGGAG GAGT TCT  
GTTGAGCGATTTGCTGCATAATGTTGATGTTTGTAGATGCGTGAGAGA GGAT AATCTGTCCATTTTGTCTG  
GGCAGTTACTAATTGGTCTTGGATATTTGAGCGTTGTGCAGAATAGTTTTGGTTCTGGTTTTGTACTCGT

GTGATTTTCGTCTTCTTTAGCTCCAGAGCCAACGACAGCGTATTTGATTTGATTCGTTTCTTGGTTTAATT  
GCTGTTGGATATTAGTATTGTCGTTTAGCTGCTTAGATTGCGTGA GAATCGTCTCTTGACGTATTTCTAC  
AGCTTCTAAAAGAAGA GAGTAAATGCTGAACAA GAGTCTGCTATTGGAGGCGTTCCCAAAGGCTCTAAA  
GGAGGTAGCGAGGAGACGTATTGTGTGTCTCCTACCTGTGAGGTTGGTGCTGACATATTC TAAAAAATTT  
TTTTGGTTTTTATTTTTTATTTTACCAGCAATTTCTCTCTTTAATAAAAAATAATAATTTGTTTTAAAAAT  
AAGCCGCTTATTTAAGCCTCTTTCTTTTAAGTGCTAACAGCCTTGAGAGAGGGGTATAGGCTTTTCTTCT  
GTTCAAATC GGATATTTGGACAGCCC GCGATTC TTCCCTAAAAA GGATTTTGGAA GAA TTAGCGGAGGA  
AGGTTACATATTATTAATCAAGTGTTAAGGTTTTTCGCAGAAGGCTGCGAGAAAATGTTTAAATGAAACC  
TGTTTTCCAATGAGGGGGCTGTGTGGCAGAA ACTC AAGACTGCGAGCGATT GGATTTTTTAAATGGTGAT  
GATATTAGTGCTTATGTAGTGCTAAC TTGTGGGCA ACCCTCGGCTGAAGGGAAAAAT GAATGTGAGATGG  
TGTATGAAGGGGAT CGA GAAT TGGTTAGCTTTTTGTTAACC AAAGCGTTAGCTTCTTTGGAGCAGCCCTA  
AACAAAAAAGA GGGT TCTAATG GGATTC GGA ACTGTGAGAGGGAAAGGAAAAGCTGTGAAGTCTTCTTC  
CTAAGGCCTCTACA GAAT CTTGAAGTAGGGCTCTTTT CATTACCTATAGTGTTATGTTGGGGGAGATTG  
GGTGTGTATCTTCAATCTCTTCCGTTTCTTTAGTAGCTGTTTTAAGTATTGTAGGCGTTTTCGTTGCTCT  
AGTTTCTTCTTCCGTAGTTGGGGCTATGGGCTCTCTGTTGTAGGGGCTATATTTTTTCGGGCTGGCTCTT  
TGTAACAATTTCCCTGTGTCTGTTTTTTGGGGGA GGAT TGTTAACTGTCTCTTTTATTATTTCTTATG GGA  
TTC TCTGCTGAGT GTGTCTTTGGTTGAAGGACATATTAAGGAGAAGGCTGTATCTTTATCAGAGCTGAC  
GGCATCGACAATTC CTTCAAG ACTC CTATAACCGCGAAGTGCAAGAACGAAAAGAAAAGGAGCTTCTT  
GCCCC GAGTAAGATAACTGCTTTAGAACAAGAGCTTTCTGTTTCGCATGAGCA ACTC CAAGAGGTTTCCA  
GGAAATATACGCATACAAGTGAAGATTTACAG ATTC TTATTGATCAGAGGGATAGCTGGTTAAAAAGATTA  
CATG ACTC TCCATCAA GAGT ATGTGCGTGTAGTTGCTGGAGATGAAGA GAAT GTCATTTTCCCTTGAA  
GTCTTTCAGGGT AATTC TGAAAA GGATTC TGGTTATCAGCAGC GGGT TCAGGATGCTGAACATAAGATCG  
CTCATTTAGAGAAGCTCTGTGAAGAGGAAAATAGCGGGAAGCGCTATGCTGAG GAGT GCTT GGATAAGGC  
CTTAGCAGATTTATTA GAGT CT ACTC GGCTTAGGGAA ATTC TAGAGAAAGAGATCTTCCAAAAGGAT GAG  
GAGATCGCATCTTTGAAACAAGAGATTGCAGCGGAAAAGCTTTT GAGT TCTTCGGTCAGTGATGACAGAG  
CGGCTTATAAGGGT AAGTACCTGCAATTAAGGGAGCAGTTACGGTTAA GGATTC CTTTCTGAAAAAAGC  
TAGACCGAACGCTTCTTAGCTCAAGAGCAACTTTTAGTTTTGAAGCGAGCTAAAGAAGAAGAAGCCTT G  
AAT TTGTCTACAAC GGATAGTTTTCTATTATTC AAAATCTTTTGCTACAAATTGAGGCCTAGAAGAAG  
AAGTTACTTATCTAGAA GAGT TAGTACTTCAACAACCA GAAT CGGTAATCAGAATAGCATGTTCCATTGT  
GCACTAGGCTGGTGGTCACATGTTCTGTCCTCCAATGGTTTTATT GGGT CAATAA ACCCTTCTTCTTTT  
CGACATTGATCATAGGCTCGATAGTGAAGATC ATTC CAGGTGCTAGAG GGAT TTTACAAGAGT TCTATG  
GTGTGCCACAAA GGAT TTTTCATGAAACTTG ACTC CC ACTC CGTGTCCAACAACTGGTCAACAACAGAG  
AAGCCATATTTAGCTGCACAATTTCAATCACTTCGCCAATTT CATAACAGAGGAAGTTAGGTT CGA GAA  
TAGAGATAGCAGCATTAAGAGCTTCTAGAGAAGCTTACAGACTTTTCTTTTGATCTCAGAGACTTCTCC  
AATCATCACC ATTC GGCTGCAATCTCCATAGAATCC ATCGACAATGCAGGAAACATCAATGTT CATAATG  
TCCCCATTTTGTAACG GGATATCATTTGG GGATTC CGTGGCAAATGACTTCATTTAGTGATGTACAGATTG  
TTTTTGAAAAGGC GGATGGCCATAATTAAGAGGAGCTG GAAT GGCATTATGGCGTTTATGTA ACTC TCG  
AGAGAGAAGATCTAGTTCGTTTGTAGTT ACCC CTTCCTTAGCAGCTTCGCATAAAGCATCGA GAAT ATGA  
GCTGTAAC TTGGCAAGCTTTAC GAAT CTTTTCTATCTGTTCTGGCGTTTTGATAATGATATCATAACGAG  
AGGCGTAAAGTTGTGTAATTTATCAAGGGGACGTTCTGGTTAGTT GGGT AATGGCAGTGTTTCCATTT  
TTTTGTTACTGCCGCACCAGCAA GGAT CGTTTTCTTTTCATAAAAAGGA ACCCAA GAGT GATTTCTGATTC  
CCTATCTCTTGACATAGAGAAGAGCTTTAAGGTGTAACATATAAT ACCCTATATTGAAAGCCGTAGAAAG  
AGCTTTTAACATAAGATTGCCCGCCATCAAAGCCAACTAATAACCAATAATCGTTCCAAAGCTAACAGT  
CCCATTTGGCCAAATAAGCGATTGATAGAGCTAGAAAAGAGAAGCGTGATCAGAGA GAATAGCCAAGCAA  
GCACAATAGCTCCAGAACGATTTCTTTTGGGAAAATACCTTCTCCATATGGCCTAAAGTGCATGTAAT  
CATTGCTGGGCTGTGATAACAGGGAAAGCCAGAGGGAAAGAAAAC GGGTTCGCTTTTATCTTTCTCTAAA  
GTTTCTGATTGAGAAGGAAGTGCC TCTCATATCAATGGCTATGGAGCCAAGCAGTAGGCCTCCTGTAA  
ATTGAAAAGCAGGTAAAGTGATCC CTAGTAAGCGGAAAAGCCTCGACCAAAAAGTAAC GAATAGTAGCAG  
CAAGAGCAGTGCGAAAATAG ATTC TCGTAAAATGATGCGTTGCTGTTTTTTGAAAAGAAAATTTTTTAAT  
AATGCAATAAAAACGGGAAGAGAGCCCAAAGCATTA AAAAGAGCATAAAAAGTAAAGTAAGACGAAATA  
GT GAATGTAGCATAAATACACGTGCTTTCTTATAGGAAAGTTTGTGTAGGCCAGATACCAGAAGTTGAG  
CGCTACAATCACGACAGCTAGGCCTA GGATGGTTTGTGTTGCGATGATCGTTTTCGAGCCGGCCTT ATT  
CGCTGTTTGAAGAACAATTTGTGGTTATTGTGCATCATTAGCCA GGATAGACACAGCAGCGCACAAAACATG

GAAAAAGGAAGTTGCTGCATAGCTAAGGGGGCGCAAGCACATAGCCATGAAGGCCGATCATGAGAGGAA  
GGGCTATGGGAGCTACTTTAGGTGACTGGGATAACGAAGGAATTTTACTCCAAAGGGATGCTTGAGTATT  
CCGAAAGAAAGAGCCCGCATTCCTGTGAACATAACCCCACACCCCTCCGACAACAGTAGCTGCGCATGCTGGT  
GTTTGCAAAGAGTAAAGGAGCCCTGATAATAGAAGGATAAAGAACAAGAACCCGAGAAGAGCAAAAAGAC  
TTTCCCTCAAGAGAAGCAGCGCTTTGCTTCTTTTAGATAAATTACCTAGGATTTGTATTAAGAACCCTCGAC  
ATTAGTCGTAGAGTCTGCTGCTAAAAATAAATAACAGCTTTGAGACAACAAAAAATGACCAGTCCATG  
AGACGTTTGTAAAGAGGTTGGTGGTTATATATTGAAAGAAGGGATCTTTCAGTCCTTTGTAACTGAGGGA  
TCCCGAAATCGTCACACAGAAGTGTAGTTCAAATTGAGATTTAGTGAAACCTAATAATCAACGAGAAAG  
AGCAACATTTTTGTTGACTAACGAATCTGTAGTGTGAAACAAAAGAGGTTGAGTTAGGAAGAAGCTATTG  
TCTCAGATGCATCACTAATCAAGGTTTCAATAGAAAAAGTATCGATGGAAGCTTGCAGATCAGGGCAAGT  
TGTAGACAATGTTACGAGTAGAGATTCAGCAATTCCTGTGATAAAGGTTTCTGAGTTTGGCCAACAAA  
GGAAAGGTAACCTCCATTGAGCCTGCTCATCGGATAACACTTTAGGAGAGTCTTTAGTGCCTTCTACGT  
AGATAGCGAAAGCCTTTGGGATATTCACGACAGAAATCCAAACTGCGAGATAAAGCTTTTTGCAAGCT  
TTGGAGTGTGGAGGTGTATCGCTGGAGACCCTTTTTTCCCGCAAATAAGGAGCTGCGGGCCTGTAGGG  
GATCCATAAGTGTGAGAAAGAAAAACAACCGGTAGGGTTCCCTTTAAGGCGATAGTGACGCCCTCAACAT  
TGTA AAAACCTCCATACAAGAAATCAATTTGATAAGTGAGCATAGGAGAAATCATATCTGCGCTGACGTT  
TTTTGATTTCTGAAGGAACCACATGATGCTTGGTAAAGCCTCTAGCAGATTAGGCAGGTTCTTGAGTCA  
TTGAGGCAAAAGCCTAGTACGCGTCCGTTAAGATCTTCAAGTTTTTCAACGCCCTTCATTTTTCTATAGA  
TCAGACCTTGCAAGGAGCTGTGCGATAAGTCTGCCTGCTACTTGAACAGGAGCTCCTCGAAGTGCAGTTTT  
CAATACCCCTAAGCTGTGGTAAAGCGTGTAAATCTACTTTCTCAAGAAGCAGATGAGGAATAGAAGAACAA  
GTATCCGTATTTTTTTGTAAGGTTAAGGAAATCCCTTCATCTACAAAAATCCTTTTTCTACACCTACAT  
AGAGGGGAATGTGATTAGGATTCGAGTCCAATCCAGAGTAGAGTAAAGGATTTAGTAGGGACGGGAGC  
GGCTAATTTTTGGATCGTCTTTTAAGTAGAAAAGACAGGGCAATACAGTAATTGGAATTAGAGCAAAGACC  
CATTTTTTCCCAAAGATCTTTTGGAAAGTTTTTTCCATTCATAAGAAAAAAGGTGCTGCGCTCAAGAA  
GTAAAACGCTATAAAACAGACTTAGAGTCAAGCAGGTTAGGACAAATAAACCCGCTAGAGCCATTGCCAT  
GTCATAGTTTCTGCGGCTTTCCAGAAATAAGAAATACCTAGACCAGATTGTGTTGCAACCCATTCTCCAGCA  
ATGGTCGCAAAATCCGCGGCACTCATAGCAATTTAAGCCAGAGAAAATATGTGGCAGACCGTTAGGAA  
TTCTTAATTTAAAGAGTTTCTGCCAAGTAGTTGCTTGGTAAAGAGTAAATTGTTCTAAGAGTTTCTCAGG  
AGAATTTTTAATTCCTGATGAATGGTCAGAGCTAAAGGGAAAAAGATGCTAAGAGCTGTTGGGATGATT  
ACTGCTCTTGTCCCCAACCAACCAAGAACGATTAAGGGGCTAGAGTGAACATAGGAAGGCATTGCA  
CCAGAACACACAAGGGGTGCAACAAGCCTTGGTAGAAGGAAATAGAAGCATGGTAGCAGAAAAGGGAT  
AGCAAGTAGTAATGCTAAAAAGAAATCCCTCTAAAATGCCTTGGCTGTATAGCAAAGATGCTGGAATAGT  
ACCGGAAAAGAAATGGATCCCTGTGCTAAGTACCTTCGATGGAGGAGGCATATAAAGCCAAAACCTCGGAT  
AGTTTGGAGCACAAAACCTCCAGAGTCCAATCAAGGGAAGGATGATGAGTAAATAGCTAATAAATTTTTT  
CATAAAAATAGAAAAACGACTTCATGAAGGAAAGAAATCATAGGGGAAGAGAGCATATGCGGCAAGAGAAT  
GATAGCTTAGGAATGTGTTGGTCCCGAAGACAACTATTTGGAGCTCAGACGGGACGTTCCGCAAGAGT  
TTTTCTCTTATGGTAAAGAAATCTATGCCTCTTGGATTTCCATGCATTAGTAAAAATAAAAAATGTGC  
TGCTAAGGCGAACGGAGACTTGGGGTCTTAGATGCTAAACGCAGGGATATGATTGTTGCTGCTACAGAT  
GAAATTCCTCCGGAGAATTTGATGAACACTTCCCTTTAAGGTTTGGCAGACAGGAAGCGGCCTCAAA  
GCAATATGAATGTCAATGAGGTGATTGCTAATTTAGCAATTCAGCGTCATGGGGGAGAGCTTGGAAAGTAA  
ACATCCCGTGCATCCCAATGATCACGTGAATAAACCCAGTCTCAAATGATGTTTTCCCAACGGCAATGC  
ATATAGCTGCGGTACAAAGTATAAAAAGGATCTTTAATTCGGGTATTGGAACATTTAAAAAAGTTGTTGA  
TGCTAAAGCTTTAGAGTTTTGCTCGAGATATAAAAATGGAAGAACGCATTTGATGGATGTAGTTCCAATG  
ACTCTTGGGCAAAAAGTTTTCTGGGTATAGTTGTCAGTTGCATAATTGTTTAGAGCGGATAGGATTTTC  
TTTAATCACCTCTATGAGTTGGCTATTGGAGGGACTGCTATTGGAACAGGGTTAAATGTTCTTGAAGGA  
TTTGTAGAGAAGGTGATTCAGTATTTGAGGAGGGAGACAGGAGAGCCCTTTGTTCCAGCTTCCGAACACT  
TTGCTGCGTTATCGAATCATGATGCTTTGGTGAAGCTCACGGATCATTGACTGTGTTAGCTTGTGCTTT  
GGTTAAATTTGCTACAGATCTAAGTTTTTTGGGGTCAAGACCTCGTTGTGGATAGGGGAAATTTCTTT  
CCGGAGAACGAGCCAAGGATCTTCGATCATGCCTGGGAAAATTAACCCGACGCAAGCGAAGCTTTACAGA  
TGGTTTGTCTCAAGTAATCGGGAACAACCAGTCCATTATTTTTCTGGAACAAAAGGGAACCTTCCGAAC  
GAATGTCATGAAAACCGGTCATTATCTATGATTTTCTACAGTCAAGTAACTTATTAGCTGGTGCTATGAGA  
TCGTTTGCAGATTGTTTTGTTTGGGACTCAAGGTAATAAGGGGCAACTACAGCAAAATGTAGAAAGAT  
CTTTGATGTTGGTAACGGCGTTAGCTCCATTTTGGGTACGATAAATGTTCAAAGATTGCTTTGAAAGC

TTTTTCATGAAAATTTGAGTCTTAAAGAAGCGTGTGTCTCTTTAGGCTTTTTGTCTGAAAAAGAGTTTGAT  
GAGCATGTAATTCAGGATTGATGGTAGGGAACAGAGGACACGAATAGATACGAGAACAAGTATGTCGCC  
CGCCCCAAGTAATTC AACACGGGGCGGAGAAGATCAGAGACTTGTTTATACAAGACATCTATTGAGAAG  
ACTTACTCTCTAACTTAATAAGGGCTTTTGC AAAACAATAACGCACCTTTAATGTTGAGAAGATATGGTC  
TACTCCGATCAATTCATCTACATGGTACCTTCTCAAATCACTGAGAGGAGTTTTTTTCACGCCAGCTAAG  
AGAAGCAATGTTCTTGTCTGGTTCGCAATTC CAAGAAGA ACTCTTCTAGAGCGTGCATGGCAGATGCATCTA  
TTGTAGGC ACTCGAGT CATGCAAA GGAT AAATATTTTAGGCGGCTTTTCTATTTTCATTTAATAAGTTTTT  
CAAACGATCTGCGATGCCAAAGAAAAACGGTCCGTTGATTTCATAAATTTCCGTAAAAGGTGGTACTTCA  
TTTTTGTCTAAATAGCAAGTCATTTGAGGTTGTTCCGATTCATCAAATATTTTGTCTGTGGAGATAACAT  
CAGATAGATCGCTCATTTGTTTCATGAATAGAAAAGCTGCAAGCATCATGCCTACTTGTACTGCAGAAGT  
AATCGTAGTCATTACTGTAA GAAT GAACACGGTTAGCAGGACAAGAACGTCTTTTTTAGGAGCTGTGAAT  
AGATGAATGAAATGGTGAATTTCACTCATATTC CAAGCAATTA AAAATTA AACAGCTGCTAGACATGTTA  
GAGGGATTTTAATAGTTAAGGGAGCTAGGAGTAGTAGGATAAAGGAAAGACAGATGGCATGGATTATTC  
TGCTATAGGAGTACTAGCGCCGCACTTGATGCTAGCCGTTGTTCTTGAAAGCGAGCCTGTAACAGGCATG  
CCAGCAAATAAAGAGGTTCCAATGTTAGCAATTCCTTGCCCAATTAATTGGCAGTTTGATTGATGTCTCC  
ACCCAGTCAATTC CATCTGCAACGACAGCTGCTAATAAGGTTTTCTATTC CAGAAAAGACGGAAATAGTTAA  
AGCATCTGGCATAAGTTGAAGCATTTTAGTAATGCTTATGTGTGGGAAAAC TGACCAGGTAAAAGAGCTT  
GGTAAGGTACCATAACGGCTACCGATGGTAGGGATGTCTATTTTAA GAATCCATACTAGAGTCGATGCAA  
TGATAATAGAAATCATTACGCCGGGAT AACGAGGTTTGTAAATGCGAAAGTAGATCATTAGAAGCAGGGT  
AAATAAACCCACAGCAAAGGTCTTGCTATCC CAGGTCCATAGGTAATCCCAATAGGCTGCCCATTTGCCG  
ATGAAATCTAAAGGA ACTCCATCTCCATTTGAAGCCCAAGAAAATCTCGGATTTGGGAAGAAAAATGA  
TGACCGCAATTC CCGTAGTTAGTCCGGTCAACCACAGGATACGGCATATATTTAATAAAAAGTGCCTAGTCC  
GGCAAGACCAAAGATAACGAGGAAGATCC CAGCCATCAATGTGATAGTAAACAGTCCGCTTCGCCATAT  
TTGACACCGATACAGTAAAGGATGGAGATAAAGGAACTGGTAGGGCCAGAGATTAATACACGACTGCCTC  
CTAAGGCAGAGGCTAAAAGCCTCCAATAATTGAGGCCAATAGTCTTGTAAAGGAGACACTCC AATCCC  
GATCGCAATAGCAATAGCTAAAGGGAAGGCTAGAATCCCTGCAGTATCCCTGCGGTAAAGTCTTTTTTG  
AGCGTATTAAGGAATACCCCTTCTTTTAAAGCAGGTAAC TAATTTAGGGATAAGATGTTTGAAGGATAGGG  
AACTTTCCACAAAGCCTCTGCTGGTTCGAAAAGATGGTTTTCTTTTTATAATAGAAAGGAATTTATCC  
AACGAGAAGAGAGGTGAGAACTCTCTTGGTAGGACAGCCCTTCTATTTTTATCGCGAATAGAAACGCAA  
GCTTAGTCTATTTGTAAAGTGGTGTAGCGTTTTTTCATCACAATTCGCGATCGGTTTTGTCTAGTCAGCG  
AGTGGGATGACTAAACACAGGCTATTGTTATCC TTAAGAGGAGGAGGGTGATATAATTGC ACTCCCGAG  
TCTCTTGGTACCAACAAAAGTGAGAACACTTTCGATGAAAAAGAGT TTTCTATGCAACAGTTTTGCGGACG  
AGTTGAACGGATAAGATAGAGCTATTACAGAGAGATTTTTAGATAAGAAAACATTTTTAAGAAGGTTT  
TTATCACTATTTTATTTGAATCTGTTAATCCAAAGTGGTGGAGGATAGTTTCTTTTTATTAAAGGATCGG  
AGGGTTTTCACTGTAGAGTTGAAAACGTTTTTGTGTAAGATGATCTAGGTCTTGTAAAGCTTGTCTTTT  
GGATAGCGCCTTCTTTGAAGGGTTTCTATACTAAGA ACTCCGGAGATGAGTCCAGGATCTGTGTATAAG  
GTTGGATTC TAACTGTCTGTACATCAGCGTATATACGCAAAGTCTTGTGTTTTCTCGTAATTTATTTTGC  
CTAAGCTTCTGCGGGCTCTTGGTGTCTGAATAAAGTCTCA GAGTAAGGTGCTTGTGAGGCTTTTATG  
TTAAAGTTCCAGTTATGTTTGTATTTCTGTTCCGATATCTCGCGATCGTTTTTGAACATATTGTTCCGAG  
TAAACAAGTCTGCCGTATCTCTTGCTATGGGAGGCTTGATGTGGTTAGTTTGTTTTTCCCATATACCGCA  
CATTGATCACGTATGATGGTCAAGAAATTCAGACATGGCACAAGTCATTTCTTCTTATTTGCTGCG  
ATGGCAATTGTGGA ACTCATCGATGCTCATAGA GGATTTTCTATTGTAGTGCCTTGTGTAATGTTGAAT  
CCAGAAGCGTGCTGCTTTGGGATTACTTATCC TTTCTTTTTTCTTTCCGCAGCCTTAGATAACCTGAC  
ATCCATTATTATTATTATTCTATTC TAAAGCGTCTGGTGAAGCTCGAGA GGATCGGCTGCTACTAGGA  
GCTCTATGCGTGATTGAGTAAACGCAGGAGGAGCTTGGACCCCTTAGGGGATGTGACTACGACTATGC  
TTTGGATTAACGATAAGATTTCTACGTCGGGATTATTACTACGCTATTTCTTCC TAGTGTTGCTGTGT  
AGTGATCGCAGGAATCTGTGGGCAATTATTACTAAAAAACGTCGTTGTTCA GGATGTG CAGAGGATTTG  
GATAGAGAACC GGCGCTCCCTAA GAGTAACCTGATTCCTGTGTGGCTTTGGTCTTTGCTCATGGTTC  
CTATGTGAAAGCTGTATTAGGAGTTCCTCCTTTTATGGGGGCTTTATTGGGGCTGGGTTAGTTTGGTT  
GGT GAGTGATTGGATTC ACTCTCCCTCATGGTGAGGGGCGTAATCATTTGCGTATGCCGCATATTTAACG  
CGTATCGATATTTCTTCTGTTACATTC TTTATAGGGATTCGTTGGCTGTTAATGCGCTAACCTACTCTC  
ATGTATTACGGGATTTATCTGTGAGTATGGATGCGCTGTTTTCTCGTAACACGCTTGCTGTTCTTTTAGG  
TTTAGTCTCTAGCGTTTTAGATAATGTGCCATTAGTCGCTGCAACAATAGGTATGTATGACTTACCTATG



AACGATCCCTCTTTGGAAACTCATTGCCTATACAGCAGGCACAGGGGAAGTATTC TCATCATTGGATCCG  
CTGCAGGTGTTGCCTACATGGGAATGGAAAAAGTGAGTTTCGGCTGGTATGTCAAACACGCTTCTTGGAT  
TGCTTTAGCCAGTTATTTTGGAGGCTAGCAGTCTATTTTCTAATGGAAAATTGTGTGAATTTGTTTCGTT  
TGAGGTAGTCAGTATGGCAGAGTTCTTTTAAAAATTC TTTTAATAAAAAGGTTCCTCTGCCTATTC TAGGC  
CCCTTTTTGAATGGAAAATGGGT TTTTGGAGAACATCGATTATGAAAATGAATAGGATTTGGCTATTAC  
TGCTTACCTTTTCTCTGCCATACATTC TCCTGTACGAGGAGAAAAGCTTGGTTTGCAAGAATGCTCTTCA  
AGATTTGAGT TTTTGTAGAGCATTATTACAGGTTAAATATGCTCCTAAAACATGGAAAGAGCAATACTTA  
GGATGGGATCTTGTTCAAAGCTCCGTTTCTGCACAGCAGAAGCTTCGTACACAAGAAAATCCATCAACAA  
GTTTTTGCCAGCAGGTCCTTGCTGATTTTATCGGAGGAT TAAATGACTTTCACGCTGAGTAAC TTTCTT  
TGCGATAGAAAGTGCTTACCTTCTTATACCGTACAAAAAGTAGTGACGGCCGTTTCTACTTTGTAGAT  
ATCATGACTTTTTCTTCAGAGATCCGTGTTGGAGATGAGTTGCTAGAGGTGGATGGGGCGCTGTCCAAG  
ATGTGCTCGCTACTCTATATGGAAGCAATCACAAGGGACTGCAGCTGAAGAGTCCGGCTGCTTTAAGAAC  
ACTATTTTCTCGCATGGCCTCTTTAGGGCACAAAGTACCTTCTGGGCGCACTACTTTAAAGATTCGTCTG  
CCTTTTGGTACTACGAGAGAAGTTCGTGTGAAATGGCGTTATGTTCTGAAGGTGATAGGATTTGGCTA  
CCATAGCTCCTTCTATCAGGGCTCCACAGTTACAGAAATCGATGAGAAGCTTTTTCCCTAAGAAAAGATGA  
TGCGTTTCATCGGTCTAGTTTCGCTATTC TACTCCCAATGGTTCGCAATTTTTGGGCAGAGCTTCGCAAT  
CATTATGCAACGAGTGGTTTTGAAAAGCGGGTACAATATTGGGAGTACCGATGGGT TTTCTCCCTGTCATTG  
GGCTGTTATATGGGAGTCGGAAGGTCTTTTTCCGCGCTTATATTTCTTCGGTGACTGATGGGGATGGTAA  
GAGCCATAAAGTAGGATTTCTAAGAATTCCTACATATAGTTGGCAGGACATGGAAGATTTTGGATCC TTA  
GGACCGCTCCTTGGGAAGAATTTGCTAAGATTATTC AAGTATTTCTTCTAATACAGAAGCTTTGATTA  
TCGACCAAACGAACAACCCAGGTGGTAGTGTCTTTATCTTTATGCAGTCTTCCATGTTGACAGACC  
TCCTTTAGAACTTCTAAACATAGAATGATTC TGACTCAGGATGAAGTGGTTGATGCTTTAGATTGGTTA  
ACCCGTTTGGAAAACGTAGACACAAACGTGGAGTCTCGCCTTGCTCTGGGAGACAACATGGAAGGATATA  
CTGTGGATCTACAGTTGCCGAGTATTTAAAAAGCTTTGGACGTCAAGTATTGAATTTGTTGGAGTAAAGG  
GGATATCGAGTTATCAACACCTATTCCTCTTTTTGGTTTTTGGAGAAGATTCATCCACATCCTCGAGTTCAA  
TACTCTAAACCGATTTGTGTTTTGATCAATGAGCAAGACTTTTCTTGTGCTGACTTCTTCCCTGTAGTTT  
TGAAAGACAATGATCGAGCTCTTATTGTTGGTACTCGAACAGCTGGAGCTGGAGGATTTGTCTTTAATGT  
GCAGTTCCCAAATAGAAGTGAATAAAACTTGTCTTTAACAGGATCATTAGCTGTTAGAGAGCATGGT  
GCCTTCATTGAGAACATCGGAGTCGAACCGCATATCGATCTGCCTTTTACAGCGAATGATATTCGCTATA  
AAGGCTATTCGAGTATCTTGATAAGGTCAAAAAATGGTTTTGTCAGCTGATCAATAACGACGGTACCAT  
TATTC TTGCGGAAGATGGTAGTTTTTAACTGGCGTTTTTCGTTTATAGTAAGAGGGGCTTTGCGGATTTA  
TAGTCCCAAAGCCCTTGTGTTTAAACATTAATAAATGGAAGGTGATGCATGCGTAAAATPATACTC  
TGTTCCCTAGAGGCTTCTGTGCGGAGTTATTCGTGCGATACAGACGGTTGAAGTAGCCCTGGAGAAGT  
GGGGGAGACCTATTTATGTAAAGCATGAGATTGTACATAATCGGCATGTCGTAGATAAATTACGGGAGAA  
AGGGCTATTTTTATTGAAGATTTGCAAGAAGTTCTCGTAATAGTCGAGTGATTTTTTCCGCACACGGGA  
GT TCCCCCTTCTTAAAGAGAAGAAGCTACGGAAAGAAGGATTGATTGCTATTGATGCGACATGTGGACTGG  
TTACGAAAGTGCATTC TGCAAGTCAAATGTACGCTAAAAAAGGTATCACATCATCC TTATAGGCAAAG  
AAAGCACGTTGAGATTATTGGGATACGCGGAGAAGCCCCGATCAAATCACTGTGGTAGAAAATATCGCT  
GAAGTTGAAGCGCTGCCTTTTAGTGTCAAGATCC TTTGTTTTATGTAACGCAAACGACATTGAGTATGG  
ATGATGCTGCTGATATTGTTGCGGCTTTGAAGGCTCGTTATCC TCGAATCTTTACATTACCCAGTTCCTC  
TATCTGCTATGCTACACAGAACCGACAGGGAGCTTTACGAAATATCC TTTCTCAGGTCGACTTTGTGTAT  
GTAATAGGGGACAGGCAAAGCTCCA ACTCAAATCGTTTGGAGAAGTGGCAGAGAGACGAGGAGTTACTG  
CTAGACTTGTCAATCATCC TGTATGAAGTCACAGAAGAAATTTACAATATTCAGGAAATATCGGCATAAC  
CGCTGGGGCTTCTACTCAGAAGATGTTGTGCAAGCTTGTTTAATGAAATTACAAGAGCTGATTCCTGAT  
TTGTCTATAGAAATGGATCTTTTTGTAGAAGAAGATACAGTATTTAGTTGCCTAAGGAAT TATAATTAG  
AGAAGTCAGATGAGTTTATCTCATCTGACGGAAT TTTTCTCACTTAGCTATTGGTAGAGGCTGCGGACTG  
CATCATGTTGCGTTTGTAAAGATCTGTAGCAAGAAGCTATCCATGTTTCGCCAATGATCTTTAAGCTCTTC  
TATCGATCGAAGCATTTCTGCTGTTCTAAGCGAAACAGTTCTTTATAACTCTCAGCGATTGTTCTGACT  
GCATTGGCACGGAGATCATAGACTGTGGAGGAGACTTTAGCTAGTTCAGACAGAGAAGAACACACTTTCC  
CCATCC CCTCAAAAAATGTTTTTGTATGAGGCTTGTGCAACACCTGTTGCTTTTGAATGACATTGAG  
AAGTCTTCTCCACTACTTCCCCAATGATAGGGGAGATACCTCCGAAAATACCCAGGGTAGCTGTAGCA  
ATGCCAAGCCATTTTGTAAATTCGAGCCTGTTTTGCAAAGGAGTCCGCGATTTTCTTCGCTTCTGTCATGA  
AGTGTGTTCCGGGTAGATCGGCGTTCAAGAAGATCC TGTTCACGGCTGTTGAGCATCAGTTTCATGATTC

CGCGCAGATACGCA GAATATCTAGATGATTCAGGCGTATGTGAAGCAATTGACTGAGCTGGGCTTCAGAG  
AGAGCAA ACTCAC GAATTTCTCTGGTAAATACTCAGGATCAAAGTGGTGCTCGCGTCGTTTTTTACTAT  
GAGAAAGAAAGCTTGCAGAGATGGCAAGATCTTCTTTTTCTTCTTGTGTTGATCCGATTGATGATGGTC  
ACGATCTCCTTCTTGGATAGGTCTTCTCGTTCTGTGTAAGAGTCTTCTCTCGCGAGAGTCTTTTTTGG  
GCTGTTGTTTCAAATAGAGCCATTGGGCTAAGAAGTGTGCACGAGGTGAAGAGAGATTCCTTTTGCAATG  
AGGAA GAATGGGAAGAAGATTGCTCTCTTGAAGCAGCG GAATCTTCTTCGAGGAAGAAGAGCTTCTTT  
GTTGAAGATAGTAACAGA GAGTGTAGGGCTACAATTT GAGTTTT GAATAGGTTCCCGATCGGTAAGAGCC  
TGTTGCGTGTGGGT AACGAAATGATAACAGGTATACTTCGTAAAG GAGTGAATGTTGGGAGATGTCT  
GTATGCGTCTTGTACGGAAGATTTATGAGATATCGGGT AGAAGGCTTATTATGTA GAGTCTGGGT CGG  
AGTCTTTTGAGGTGTAGGGTGGGT GTTAAAGACTGCTGTTCTGCTGTGGCAGATTCCTGTGTTTCGAGAA  
GAAGCAGAAGTTTGTGAGACAGATATTTCAAAGGACAGCTTCTCGAAAGAAGGA GAATGTTTC GAAT  
GAGGAA GAGTTTTTTCTGTCTGCTCAATAACAGATAAACAGAGATCGGAAAGGCTCCGAAGGATGCTGC  
TTGACCTGGTTCAAGCAGCTGTATTTCAATTGGAGAGGGCAGAGGCTTCTTACAAAGAAGTCTCTGTCTGC  
TCTCCTGTTGCTATTGTTTGTAAATGAAGGTAGTGTCTCTTGGCGTACTGTTATCGTCATGGGAA GGATCG  
CTATCGTAAGGCGTCTGTAAACGTTTGGTCAATTTCTCGTTGTAATTTGTAAAGTTTCTGTGAGTGTTTCA  
AAAGAGTTTTGCATA GAGTCAAG GAGTGTTCAGCACGTAAAAAAT ATTCATCCCGTTCCCAATTTATTA  
ATTCGATGCGTGCATCGATTTGAGTACAGCGTGCAC GAATTTTTTGTACTGCTTGATTGTAAATAGAGGGC  
AACACCTTGTGTCAAGCCAAGC ATTCGGAT AATGCTGGTGAATAGATTTTACAACGCCTTCCAACAGA  
GGACTCATCCCAATTTAGCAACATAAAGGGCAGAAAGGGATAGCAGACAGCTAAAAACAGTTAAGGCCA  
GTTTGACATAAACCAGATAACGCATTTTTTTTTCTAGATCATTC CCGGAAGATGTTTTGCAATAGCTCT  
CCAACCATCAAAAGCTTCTAAAAG GGATATGACTATCATGATTAAAGCTGCGAAAAGGGAACACCAGGAA  
AGGATGCCACCTCCAAGCGCTATGATGGTTACAGC ACCCCATTTCT ATCCAAG GGATGATTGTAGCGA  
CGATGCTCGCTAGAGAATCCCAAATCGCATGGTTTTAGACTTATCAACAATTTTCTGCACCTGTTTCGAT  
TCGTTCTTGGTGCAACATGGTTAATTC TTGCT GAGTCTTTCTAGATTGTCTTTGTAGGCAGAATAGGCA  
GAAAAATCTGCAAGGATACCTTGTTTAGTGAGAAGGTAGCTTAAAGAGAAGATCCCTACAGTAGGTGGTG  
TGATGATAGGAACA ACTCTTTTTGGCTCGTTCCCTTCTTCTTTGTATTTTGTGAGAAGGTTGCTGAGAATA  
AGGGTCTTCTTTCGAAGAGTGTCTCGAC GAGTCTTGACTTTCTCCTGATGCTTTGGAAGGAGGGGTGGAG  
GTTCTAAGTAGAGGATGTTTTTGTCTTGTGCAACGGTTTCTTCTTTTTTTTTGTGTCACTAACCTTTCCT  
CTAGAGACTCAGTTTTCAGCGGAGAAGCTATCTATTTCTTCCATGATAGGAGACAGATTGCTCTTTTTGAG  
AGAGCTAAATGACTCCTTGTGGTGTTCAG GAGTGTGAAGAAGGTTCTCTGAAGGTTTAAACAGGCTCCGAA  
GAAGA GGTTTTTGTGCTCTTAGCCTAAGCTCTGATGAAAGGTGCAGTTTTTCTGATAGTTTACCGG  
TG GAGTTTTCGAGCCTGGCTGTTTGAAAAAGGTTCCAAGGAGAAGATGTTGTAGTGCCTACAGTAGAGGA  
GAGTGTGAGAAGAGGAGAGCTTCCAAA GAATAAGATGCGCTCTTAGGTGTAGTGCCTGTAGCTAGAG  
AAAGAAAGCGGGGCAG ATTC TTTTGTGAGAAGCAAGATGCGCAAAGATCTTTC GGATGCAAGAAGGAGCGC  
TCTCCTTAGATATGGAGCAAGAATAAGG GAATTTTTCTGTCTGGACGGCCAGAGAAGCATCTGGTAGATC  
GAGAGT TTGAGAGAGAGCGACGCTGTCTGCTTGGACAAACCA GGATGACATAATAATAAGAGTCTTTTGT  
GATCTATTTTAGGCGTACGATTTGATCGCTAAAATTTCTTCTTTTAAAGAGCTATAGGCAGAGCTTGT  
TTACTTTTTGCCAAGCAAGATCAAGAGCTTTTTTCAGCTTCTTCA GGAT TATTGAGCAGGGTGTAGCAGAT  
GTAGGCATAGTAATGAGGATAAGGGTCTTTTTCTCTTAGCAAAGCAGCTACACCATAAGCATGAAGAGCT  
TGTTGATATTTTTGGCGCATATGGAGCGAAGCTCCTAATGAAAACCAAATTTAGACACAAAT GGGT TAA  
AGAAAATCAACCAGTAAAAGCGGTAGAAC TTTCTCATAGTCTCCTTGTAAATAGGCGTTGTATCC TTC  
CTTGTAGACTTGTCAAGATCTTCTGAGGACAGTTTAAAATTTTTGATAGGTGTCCAGAG GGATATCT  
TTATTGG GGATATAATTC TCAAAGTACGCTTCCATATTATCGGGAAGCGGACACATATGAGGGT AAGAGC  
GAGCAATTTTATC GAGTAGATAGGCTAAATGACGCATTAGGGACGCATGTTGTAGATAAAGGTGTCCATA  
AGTCTTTTCAAAGTTTCAAGACATTTGGATCTTGTCTGGTGGCATTGAGACACTTCTTGGAGATGGCGTT  
GCATATCAGTGCCTCTAGCT GAGTGATTTTCTCCATATTTCTTTGCGCATCT GGATATTTTCTTTCAG  
AAGCTTTTTTCTTCTCAGACCAGTCTGAGGAGTCTCCAATTGGGACGCCTAGTTTTTTAGCTTGATCT  
ACGAGAGCGCGCATTTCTCATCTTG ATTCAGTCAATGGCTCCTTTTTCTATTGTTAATTTTTGACAGGA  
GTAACGTCAGCGCATCGACACTATCTGTGCGTCTTTGACGCGGAGATACA ACTC GTGTGCCTCGGCTTC  
TGCTTGGCCTAAA ATTC TAGCCAT GAGT CGCAT GAAT CGTAAGAAAACGTTTTTCGACACGAGCTTCTTTA  
GGAGCTTCTCCGTAGC ATTC TGGGAAGAAAACAAGGACATAGGGGAGGGCGGTC TTTTTTGGAAAAGT AC  
TCTGATTC GACTC CTGATCTAAATTTGGACGAA GGAT GAGGGGCCGATGATAAGCAAAGTGAGAGACAGA  
AAATACTTCTCAGTATTTTCTATCTTCC GGAT GAGA GGATCTTTTAGAAGAAGACACTTGCATATC ATCC

GAGAGATCTTCTCTTGGTAA**GAAT**GATCACT**ATTC**TGTTCTTGATCA**GAAT**GTCTTTCTTGTGACCGT  
CTCTTTTTTCTCTTCTGTTGAGCAGGTTTTAACTGTTTGGAGAAGAAA**ATTC****CC****ATTC**CTGGGAAGAAAG  
TTGAGCCGTTCTGTT**GAAT**GGCCTGTCTGGTAAGTACGAGAGCTATGATGAGAAACACTTTGAGAAGAT  
GTT**GGAT**TTGCTCTACGGTGAGGCACGATAGACAAAGGAACGGCTCTTATTGTGCAGCGCGCTGCTGGAG  
AGAAGG**GAGTATTC**AGTCCCTGTATAGCACGAGCTGGTTGTTGGGGAGATAGGG**ACTC**CTGAGAAGAAGG  
TAAGGAGC**GAGT**CTGTGA**GGATCC**CTGCGCCTGTAAAGAAAATATGGAAACCTTCCAGAAGGTGCTGGA  
GGTGTTTGAGCAGAGGTTTCTTCTGTTGGAG**GGAT**CGACTATCAGAAGAAG**GGGT**CTCTTCTAGAGCTT  
GGAACATTTCTGCAATCT**GAAT**TTCCAGCTCGACAGTCTCGGGAGGAAGGAAAATGAAGGTTGAGGGCT  
AACAAGAGCGGG**GAGT**TCTTCTTGGAGCCATATTAAT**ATTC**ACAACACCTACCAGAGAGATCT**GAGT**CTCA  
TTACCACCGTCTTCAATAGATTGAGACAGAACAACGTCTCCTATGCTTGTTTTTAGAA**ACCC**CTTTTTCTG  
CAGAAGAAAATTGAGAGGAGCTCCCTGGTTCTCCCTTAAGAGAAGCGTTTGTGCGTACGGAGGAAAAG**GGG**  
**TGTGG****GAGTATCC**ATAGTTACAGAAGTTAATGT**ATCC**AGGCCTTTTAGAAAGGAGGGAACCTTATCTAAAA  
AGTATTTTTCTATGCAAGTT**GGAT**TATAGAGCTCGGCAGCATTGTTACTGTCTAAGGTTCAATATATTAAT  
AGGAGGTTAGG**GAGT**ACATCATTGGCATTGTGGAGGGACAGGTAGTATGGTCAGGAAGAAAAAGCGGAA  
ATATTGATACAATGGAGAGG**GAAT**ATTGTATTTTTTTTTCTGATCAAAAGAGAAAAGGTGTGCGAAAAGAAC  
TAACATCTTTTGCACATATAGAAGAAAAGAGCGCAGAAGACGATAACCTATTGCGAAAATAAGC**GGATAG**  
AGATACCATGGTTTTCTCTATC**ACTC**ATCTATGCCAGGTGGTGAAATTGGTAGACACGCT**GGAT**TTAGG  
**ATCC**AGTGCTTCGCGGCATGTAGGTTCAAGTCT**ATCC**TGGGCATGGCTTTCTTCTAAAAATCTTCTTG  
TTCAGATACCTAGTGTGTTTTATTT**GGATAACCCGAGT**CTGTGGTTTTTTTTCTGCGGCATCGGAGAAAAGGT  
GGGGAAAAGT**GAAT**GAAACAGCTGTCAAT**CC**TTTTGG**GGAT**GCTTTCGTT**GAGT**TCTGCTGTTTTTTGGGG  
CTGATGCGGTGT**ATTC****GGAT**CTCTAGTTCAACCTTCGAAAGCGTTCCTTGTTCAG**GAGT**AGAATTTGA  
AGAACAGGAAGGGGAGCG**GGATTC**CTTATAGTTTTTACT**ATCC**CTACCAGTATGACTATTATT**ATCC**CAAT  
ACAGGTGTAGACGAG**GGAT**ACACCAGA**GAGT**TTTCAAGAGAAGCAC**GAGT**GCCCTTGTAAAGAAACCTGTTT  
CAGAGAAAAAGAAGAAAAAACCTCGTCGCAGATCTTAGATATCTCTAG**GGAT**GGTAGGTGT**GAAT**TTTTT  
GATTAGGCTCTCTGAGGCTACGTGTGTATAGATTTCCGTGGAAGAAATGCGA**GAAT**GCCCAAGCATTTCT  
**TGAAT**AATACGAAG**ATCC**GCGTGGTTATT**GAGT**AGGTGCGTTGCAAACGCATGCCGCAGAGAAT**GCGGCG**  
AAATGCGTTTTGGTAGTGACTAATTTTTGCATAAAAAGTAATGCGTTTTCCATACACAGGAACGATC**GAGT**TT  
TTTTCCCTCTGATAGACAAAATACATGTTCTTCAGAG**GGAT**TTTTTTTTTTGTAGTTCATCTCTGAAAGAG  
CTTAAGTAAGCGTCAATAGCTTGTTTGGCTTTGATGCTGATGGGCAC**GAGT****GAGT**CTTCTTCTTTTAC  
CAGTAACGC**GAAT**AAAATCATCACTGATGTCCCGATACAAAGATCACATAGTTC**GGAT**ACAC**GAAT**TTCC  
TGTTGCATAG**GAAT**GTATACAGAATAGCGGCGTCTCTGCTTGTATAT**GAGT**GTCTAAATTAG**GGAT**ATTC  
AAAGGTTGATCTAATAAA**GAATTC**ACTTCTTCTGTGAAAG**GGAT**AGAAGGG**GAGT**CTCTTCCAGATTTTT**CG**  
**GAT**GTTCTATAAAGGGCTGTTGATCGAGCATTTCACATCTTTTAGGAAATGGAAAAGACTTTTAGGGC  
GATCAGTCTGCGAGCTAAAGTCGTTTCAG**ATTC**TTTAGCTTTATGGCATTTTTTCTACAAATAGGAAGAC**A**  
**CTC**TCTTGGTTG**ATTC**TATCGGTAGCCTCAATAGAGGGCGGTTGTA AAAATAAGAGAACATCTTGGCAAT  
AAGCTTGTACGGAAAGAGGGGAG**ATTC**CGCG**ATCC**ACGGAGAGAAAAGATCGTAAATTTGTTCTATCAGTCG  
TTTGTGAAAGAGGGCAGAGG**GAGT**CATTTTGTTTATTAG**GAAT**ATTTGCAAGATAAAAGCACGAGCAATT  
TTTATAG**GGAT**AAACATTTTTAG**GAAT**AGAAGAAAGCGTATTTCTCCTGACAAAATAAGATTTCTTTTAA  
TTAC**GAGT**GTAGGAGGTCGTATGTTGATAATAACGTTTCTAAAAGGTACCATG**GAAT**AGCTCTCC**ATCC**  
TACTGAAAGAAAGATGATTAATATAAGGTCTGGAGAG**GGAT**AGTACAAAGGCGCTGG**GAGT**TTTATGATC  
AAGATAGCACAAAGTTTCAAACCTTACATAATGGA**ACCC**GGAGCTAAA**ATCC**CT**ATTC**CCGGTTCGACTT  
TGTATGCGCAAGTATTTCCATCTCTTTGGAG**GAAT**TTTTTCTTCTTCGCATGAGCTGGTAAATGAAGGTAG  
**AGT**TCCT**ATTC**AAGGTCCTTGCAGCGTTTCGCAGTATTTCAAAATTT**GAAT**CGCGGAG**GAGT**CGCTGTA  
ATGACTGAGCAGTATAAGTATTATCTTTCTCAAAC**GGGT**GTTATACGCGTTCTATAGC**GGAT**TTGCC**AT**  
**CCG**CTTCTTTTT**ATTC**TGGAGAATATGTTTCTTTTG**GAGT**GCATAAACACGCCGATCTAGAAAAAATTAG  
AAGAAGAAAAGATCTTAAAGAG**ATCC**TTCCCTTCT**ATTC**CGTCATGGAGCGTTGTTACAAAATCAGCCT  
AACCT**ATCC**ATGGAGAAGACCGAGGTTGCGCTTCTATT**GGAT**ACATTAGATGCAGCTATTGCAGAACCTA  
ATAAAGAAA**GAGT**GTTTTCTTTATTAGAGAG**ATTC**GTTTATGCA**GGGT**TATCTAAAACATTGCTCCCACG  
TTTGTATGATGAA**GAGT**ATCAAGGCATAGTATCGGAAG**ATCC**CAGACCAGG**GAAT**GAGGCTGTTCTTTT  
TCATTACTGAGAGCTGCAGCTCTCAGTATGCGGAG**GGAT**TTTT**ATTC**AAGAGAGT**GATG****GGGT**TGTTACCT  
TACTGCCTGCGCTTCTCCAG**GAATTC**CCTTGGGGT**GGAT**TGGCCTGTATTTTGA**GAAT**ATTGGGGA  
GATTTCTTT**GAAT**GGTCTAAGAAAACC**ATTC**GAA**GAGT**GATTTTAAAAGCTCACGTTTCTAGGGAGCTT  
GCGATCATTAGTCCAGGTGTGT**ATTC**GTCTCGTTTCCGTGTGCAAGAACAAAGGTAG**GAAT**TATCTCTTGTA

AAATAAAAAATCTTTTAGAAAAAGTGGAGATAAAAAGCCGGAACCACGTATCTATGGGACCGTTTTTGTAA  
ATAAATGCAGAAAATATTGTGGATCCTTTTTCTTAAATACTCAACACGTGGAACCTTCTCGTTCTGGTA  
AACAGAGCAGTCCACAAGATCTTTTGGGAATTGTTTCTGAAAGTTTGAATCAAGATCGGATAGTTCTTTT  
CCGCCCTGGGCGAGACCGTTTTTGTGAGTTGCGAGGTAAGATTC AACAGGCA GAGTCGCACCATTCA  
GGATTTTTTCTCTCCTGTAATGAAAGGAATTTCTCCCAAGATTATC GAGTCTATCATCAAAATGGTT  
TATTGGCTCATGATCC TTATGCCTCCCTTTACTTTGGGGGAAATCGATTCTTTTTTATTCATGAAGG  
GACTCATCAGCGTATCTATGAACGCATGGGTGCTATCCCTTGTGAAATTGATG GAGTACCTGGAGTAAGA  
TTTATTGTTTGGGCCCTCATGCTCAACGTGTTTCTGTTATTGGAGATTTTAAATGGGTGGCATGGGCTCG  
TTAATCCCTTTCATAAGGTTTCAGATCAAGGAGTTGGGAGCTGTTTGTTCCTGGCCTTACAGCAGGAGC  
TTGTTACAAATGGGAAATGGTCACA GAATCTGGGCAGGTTCTCATTAATC GGATCC TTATGGGAAGTTT  
TTTGGTCTCTCTCGGAGCGTTTCCGTTGTTATCGATGATTC TTAT GAATGGAACGATAGC GAGTGGT  
TAGAAGAGCGCATTA AAAAGACTGAAGGCCCTAT GAATATCTATGAAGTTCATGTA GGGTCTTGGCAATG  
GCAGGAAGGACAACCTTT GAATATAAAGAGCTAGCAGATCAGCTAGCTCTCTATTGCAAGCAGATGCAT  
TATACGCATGTA GAGT TGCTTCCC GTAACCGAGCATCC TTT GAATGAATCTTGG GGATATCAAAACAACGG  
GATATTATGCTCCTACAAGTCGTTATGGCTCTTTTGAAGATTTACAGTATTTTATAGATACCATGCATCA  
GCATGGTATCGGGGTGATTTTAGATTGGGTTC CAGGACACTTCCCTATAGATTCATTTGCAAT GAGTGGT  
TTTGATGGC ACTCCTCTGTAT GAATATACACG GAATCCGAGTCCGTTGCATCCTCAC TGGCACACCTACA  
CTTTTGATTATGCTAAACCGGAAGTGTGCAATTTTCTTTTAGGAAGTGCCTCTTTT GGATCGATAAAAT  
GCATGTAGATGGTATTCGTGTGGATGCTGTCTCATCTATGCTTTATTTAGATTATGGAAGATATGCTGGA  
GAATGGGTTCCAAATCGTTATGGTGAAGAGAGAACC TTGATGCGATTCGGTTTCTTCAGCAATTC AACA  
CTGTGATTCATGAGAAATATCCAGGTGTTTTGACTTTCGCAGAG GAGTCGACAACCTTCCCTAAGATTAC  
TGTATCTGTGGAAGAAGGGGGATTA GGGT TTGATTACAAATG GAATATG GGATGGATGCATGATACACTG  
CATTATTTTCGAGAA GGATTTCCCATATCGTCTTATCACCAGAGCGATCTCACTTCCCACAATGGTATG  
CTTTTAGTGAGAGGTTTTTACTGCCTTTTTCCCATGATGAGGTTGTTTATGGGAAACGCAGTTTAAATCGG  
TAAGATGCCTGGAGATGCTTGGAGACAGTTTGCTCAGTTGCGTTTATTATTAGGTTATCAGATCTGTCAA  
CCAGGAAAGAAATTGCTTTTTCATGGGGGAGAGTTCGGTCAGGGGAGA GAGTGGTCCCCCGTCTGAGC  
TAGACTGG GAAT TATTAGATATTTCTTATCATCAAGGTGTGCATTTGTGTTTCGCAAGAGCTAAATGCTTT  
ATATGTGCAGAGCCC GCAACTGTGGCAAGCGGACCATCTTCCCTCCTCTTTCCGTTGGGTGATTTTAGT  
GATGTGCGTAATGGCGTTGTTGCTTATCTCCGCTTTCAGACGCGGATGCTAAGAAAGCTTTGCTTTGCG  
TGCATCATTTTG GGGTAGGATACTTTCCTCATTACTTACTTCCCAT ACTCCCCCTA GAATCTTGTGATTT  
GCTGAT GAATACAGATAACACAAGATTCGGGGATCGGGGAAAGGTTTTTCGAGAGCCTGAAATCC TTACA  
CCTGAAATCGCGAGACAAGAGAGAGAGGCTGCAGGACTGATCGAAGC GGATGATGAAAGTGGTCCCGACT  
GCTGGGGCTTAGATATTGAGCTGCCTCCTCAGCTACTCTGATTTTCTCTGTAACGCTACAGTAGGATTT  
GTTCTCTAATCCGTAGTTGGCCAGCTCAAAGATGAGTATCTAGACATAGCTTGTTCGTTGTAGAGATAA  
AATCAGC GAGTAGAGCTTCTCTCAGATGGGT TTGTAGGTACTTCTCTTCAAGATCAAAGTCA GGATTT  
TTCTAGGTACCACGCCAAGAAT TGACAGCACCAAGCTCCACAGGT GAATTC TCCAGGAGATTGGACTTTT  
ACTGTGATCCGATGCGTACCTGGAAAGGAGAAAGTAATTC TTCTTGATCG GAGTCTGCTCCACCTTCTT  
TG GGATAGATAGCTCCAAGGAGACGGCAAGTCTTCTAATTGTTCCCGCATTGTTGTGGAGAGGCTAC  
ATAGTCGCACAAACTGTGCAAGAATGTGACACATCGAT ACTCGATATCTACGATAACCAGT ACCCAGTGA  
CTATTTCT ACTCGGCCAGAGCTCATAGTCTGATCCATTTTCGTAAGCATAGCTTCTTGCATCAGCAG  
AAGGATCATGCCACATAAC GAATGGGAATACACTAGAGGTGCACAGAAGTCGTCGATAGTTTTCTGGTGT  
GCAAGTCGGAGGACAGAAAAGCTCGCACATGTGCGTTTCGTTGACGTTGAC GGATGTTTCGTCATGAGG  
CAGTTACAAATACATTC TAAGAAAT GAATTTGGTAAGC GGAT TACAGATGTCTATAGGGAGA ACCCGCC  
TGTGTTTGTCTGCATTAAGCACGA GAATTGGAACAAATGTTCTGTTATCC CAGATAGGAAGAGGAGGACC  
GGTTAAGACGTCATCTAGTTGTTGTA AAAAGCTTAGTTGCTTGCTGTGGTCCCTCTTGTGCTAAGTAATCC  
GCATCTAAAAGGTCACG GAATGTATATGCGCAGA GAAT AAGTCCGCAAGAGATCACTATGAG GAATAGCG  
CTATGATGATTC TAGTAAC TTTAGTATCGCAAGAAGCATCTTTGAAAGATGTATAGGTAGTTGAAGGTCT  
AGAATACGAACATGTTTGTGGGGGAGGATTTAT GAAT TGTTCCATAATAAATTGTTTCAATTTATTAACAG  
ACAAAATAATTATATCTGAAAATG GGGTTTTCCAGTTAAAATTAATCAAAAACAAAATTTTATAAAAATT  
TTTATTAATTTCAAAAAACAATATCCCTGCTGCTTATAAAAAGAGCAGATGAAAAATAGTAAGAAATAA  
GAGCGACCATCTCTCGATGGCCTCTTATTTAAAAAGATTTTTAGATTAGAAAA GAGT TTATGCTTCAGGC  
CAAGAAAGCTCTGGGAGATCC TGAACAGCCGCTTCGCAAGCCTGGACAAATGAGGCTAGGTTTTTCATGGC  
GTTCTACA GAATCAACGGGGAGATC ATTC AAAGCGTCTGTAAGG GGATCTTTCAAATACCAGTGTAAAAA

TTGACAGCACCAAGCGCCGAGCTGGATCCGGAGCCTCTTTGGATTACCTCCTTTGCTGCAATCTTTACA  
GAGAATTTCTTGCTGTCATAGGCAAGGATACACCTGGTCTAGTTGTTGAGCAAAGGATTTGAAGCTCTTTTT  
TCATATTTTCTGGAGGCATCACATAGTTGTATAAACTATCAAAATAGACCAACCGACGAGCTTGAATATC  
GACAATAACAAGTAGCCAGTGAATCGCTCCTACAGATCCTTTTATAGCTAGCTGTTTCATAGTCTGCATG  
GTATCCGAGAGTGTTTTTGGAGTAGGGTGATACCACATAAACACAGGGAGGAGGGTGTCTTTGTAAAT  
GGCGCGGTAATTCCTTTTCGAACAGCAGATAGGCAGAGGGCCTTTGATAGGCTCCCCTCGTAAAACAGC  
TTTTTTGTCTTCTAAAATCGAGATGATTTTCTGTTAAAGTTGAATATGGTAGCTGGGGGGAAGGTCTCC  
AGAGGAATGAGACCTGGGTAAAAGGTGTGAAATAGCATAGACACTTGAAAATAATGTCAGAATCCCAAG  
CAGGAACCAACGCTTCGATGGTCTGTCGTCGAGCCATATCTTCATACATCTCTACAAACACTTGCTCCGG  
AACCAAGGGAAGGAGGTCTTCTTGCGTTTTAACTGGTTTGGGAGCCTTAGGAAGAAGAGGAGGAGGTGTA  
GAGGGCTTTGGAGCAGAAGGAGTACTAGGACGTGATATGACGGGAGGGGGGGGAGTACTAGGACGCGGTA  
CGGCAAGAGGAGGAGACGGAAGAGGTACTGGAATAGAGATGGTAGGTTGCTCCTTAGTAGAAAGGTGTGT  
TTGGCAGCACCAAGGGAAAGGATGTAGATCAGAAAAGGAGTAAAAGAGGAGAATCAATCCAAAAGTAACA  
ACAACAAGAAGAACAGCTAAAGCTGTACGAGCTACTTTTTGTAAAAGTTGGTTTCGAGGTTCTTCAGAGA  
TAAGAACTGGTTTTCGACGAATCCCGAGGAGGAACAGGTGCCGTCTTTGAAGTTGAGTGGTGGGAGATAA  
CATAGGGCTATTTGCTTAATTAACCTGCTAAAGAAAAGCATTATTTTAGGAGATATACTCTTTTTTTGCCAT  
GGGGAATTAAGACTTCCCTCTAGCGAAATCCCATGAAATTATAGTTTGTCTTTAAAATCTAAAATAGA  
CGGGAAGAGGATTAAGGGGGCCGGAGCCCCCTCTATTACTCTAGAATCGCAGAGCAATTTCCCCATTGAGA  
TAATTACAGAAGGTTGAAGAGGAGTAGAATCCATGATACTGGAAATGGAGAGTAAACCACTCAAAGGTT  
GTGTTTGTGTGAGATTTTATAGGACATGGCATGACGCGATGAGGGGCTTCCACTACCAAACCAATACC  
TTTACTGGCTAGGAGCTGGGTGCGATCTCTAGTCTTGTCTATACAGAACGGGTGGTATGCCAATTC  
ACAGTCCAGGCTTGAGGTCTTTGGTAGCATTCAATAAGCTACCTTTAACTCCAATAGGGACTAGGACAT  
TGATCAAAGGAGTCTTTGTAGAAAAGCTTCGCGGATAGGCTCCACCTCAGTAAAGTGAGACAGGCTAGA  
ATAAATACCAAGAGCACCTAAAAAGGAGCTGTCAGTATATGCGTTGATCCAAAAGGTTTCATAGGGAGA  
TCAAAAAAACAGCACCTCCCATCGTTTTGACTACGGAACGTCCCTTGAGATGTTAGATTTTCTCCTTGG  
TATAGAAATGGTGACAGTTATGATCTCCATAGCTGTAAAGACCAACTAATTTAGCCAGCAAGAAACCTTC  
TTGCAATGAGAAGAGCATTCTCCTTGGCATGAGTAATTTTTTAGAAGATACGTTGTTTTTCGCGTAACGC  
TCATTGAGTTTTGGTGTAGGTCTGACTGAATTTCAATGAGAAGGTATGTGTTTGCCCTGCTATCATCCCG  
CAGAGTATCCGGAAGAGCGCATATGGAATCCAGGATGATTTTCTCGAGGATCTTGGTAAACCATCATGCC  
TAGTCCCTCCTGTAATTCCCCAGAAAGGATGATCACTAGGTGTCAGTTCTGCACTATTTTTTAAAGCTT  
TCTGTTGCAAGCAGCATATTCCCCATAAGGTATTCGCTATGAGGGGACTTCTGTGTTTGGGGTAGGAA  
CATACCCAGCAGGAAGCCAAGTCAGTAATAAGGTTCTATGGAATCTATTGGCTTTTTTGGGATCTGTGAT  
TGTGCTGAAGATGCTGGTTCTGGATCTTGAGTTTTTGCCAGCCCCAACTCAAAGTCCCTTGCCATCCA  
TAATGAGGGACATTTAGTCCCGAGAAATCCATATCATAGATCTTAGCTGGTTATCACTAGCCTCAGAAA  
TAGATAGCATAGGCTGTGATGACAGAGCATGGGTAGATCTGTGGATTCATAAGGAGAATTCATAGTC  
ATCAATGAGTGAAGTTTTACATCACTTAATGAAAAGGTAGCTGCAGTATCTGCTGTATAGTTATTGCTG  
TTATTTGTAGGCTCTACCCACAATAAAGGAATCTCAGCACCACCTTTTCAGAATGGAAGAAAGATTCATC  
CAATATGCTTCAGTGTATAGAGGCATTGCTAGCAGAATTTCCCTGCACCATTTTTATAGCAACTCAGAAC  
TGCTCCATCCCAAGAGAAACAACACCCAGTTTGTGTGAATCGATTCACTGTAAGCTGAGCATGATCT  
TCGATACATAGAAAACCATTACTGAGAGTAAGGGTGCAGGTGTTTTGTTGTAAATTGCGTTGATGAA  
AATCTGCAGAATTAACAGTAGCTCCTGAAAATACTACAGAGCCTGTTTGATCAGCTTCCCTTATTGAAGGA  
CACAGAGACCCCTGCATTGCTAACTTCAATAGGATCATAAAAAATAAATTTTGGCTACTCCCTGCTCCT  
AATAGAATTTACCAGAGGAGCTTGCTACTGTTATTGCATTTCTTCTAGGAGGATAGCTGACGTACTGG  
TACCATTTGCATTAGTTACATTAGTCACAATATTTTCATTAATAAATAATAGCATGGCGGTCCGGCAGAAAT  
TTTGGAGTTGCTGGTCCGTCTATATAGATAGCGCCCCCTTATTATTGGCGATATTGTTTATAAAGTAG  
GTAGGGCCATTATCCACTAGGGTAACACTACAGGAGCGTAAATAGCTCCGCCATAATTTTTTGTGATATTGT  
CACTAAAAAAGATCCATACCAGATGCTGTAACATCTAGGCAGTGTACTTTAATTGCTCCTCCATC  
AGAAGATTCGAAAGAAGCTGTTTCTACATTTTTAAAGCAGCGATTTGTTATAGAAAACGATGTTACCACGA  
TTTCCCTGTTAGAGAACAGATAGGGGAGAAGATCGCTCCTCCTGCACAACAGGCGTTATTGATAAAGAAGA  
GATCGCAGTTATTACTCTCAAAAAGATGCTCGTTCCAGCATAGATAGCGCCACCTTTTCCCTGCTGTATT  
AGTTTGAATACAGATGTTGTCCATAAAGAGAAAACAAGACTGATTCGCTCACAACAAGGATATTAGCG  
GTACTAATGGCTCCTCCTCGGACATAAGAAAAGTTCTTCATAAATCCGACCACATCATGATTGTGATTTA  
TGTAAGATTTTGGAGCATGAATGGCTCCGCTTCTCTTATTTTTATTAACAGCTGCATTAAGGATTACTCGA

TGTAATGGTCTGCAACAAGTATTATTTTCAAAGATTACAGGACCTATTGTATCACGAATCTCCACGGTA  
GGAATGGGACTCGCATAACCAATCGCACCACCCTTTTCAGGGTGAGATTTTTTGCAAAATAAATAC  
CTTCTTTTTGTGTATCAAAAAGCTTAGGTAATCTGTTATTGTGACAGCAGCTCCTTCATTGGGAGT  
TTGTAAGCATAGCCAGTATGTAGCGTAGGTTATCGAGATAGCAGTTAGTGAGATTGTGAGTGTCTCCTGTC  
AACTAATTTTTATTGATAGCGACTCTTTCGTAGGATCTGGAACAGAGTTGGGCATAAGAAAGATTC  
AAGGAACCTCTCTAGCTAGTCTGATAGGGAGCTTCCAATAAGGAAAAAAAAAAGATGCTTTTTTCATAGT  
TAAAAGACCAGAGCTCCTCCTGCATTGATGTAATGTGAGACAGTGGAAAGTAGCCACTTCTGCTTGATAGT  
TAGCAAATAGTTTTAGATGAGAAGATTTAAGGGAGTGAGAACCCTCCTCCATAAAAAGATGTTTTAGCTAA  
TGAGATATTTGTGGTACCCAAAGACCGTTATTTGGATTAATAGTGTATTGAGTAGAGGGCGTTCCAG  
TATAGGGTGGGTGGTAAGCGAGTTCATTTCAGGAGAGTGTGGCCAAGTATCAGAAAGATAGGCTC  
CTTTAATTCCTATTGGAGAGACAATGGCAGTATGGGCTTGCTCTAATGTAATAATCTAGCTAGATCACC  
GCTTTCCTGGATAGCACCAGGTTTTGTGCGAGAAGATAAAGCTTGAGCAAATGAGTGTGAGCATTATTGAT  
CGCAAGGGCATGCTATCGCGTAGTTCACAGCGAAGGGAAAGCTCCTAAGGTTGTAGAGTGAATTTCCCTT  
TAGAAGATCTTTTAGTTCATAGAACTCGCATGTTATGTGTTCCATAATTACAAGCTGCTGCTCCGAT  
AAGAGCAATGCGATCAAACATAAGATGTTTCGAAACATAAAGCAGAAAGATAGTAACGAGAAGAAAGCGG  
TTATTTGTTCTTTTTCTTTTCATCTTATCAGATGACTGGGAGAAGGAAAGAAGAACTTATGACCATGAG  
CTCCTGATGCTTGAGAAGAGACGGTATACCTTTTGATGCAGAAAGTAGCCATGATAACTTAAACGTTT  
TTGTTGTTTTGTAAATAATGTTGTTGCAGCTCCTTGCAAAGCAAACCAAGAGTTATCTGGGAGTAAATGAT  
CGTAAGCCCATGGTCATGTTTCTTCTGAATGCACCAAGCTATTCGCTATCAGATCTCCTCTACGAATAG  
GATCTACTATGTATCCGACTGGGTCCAGTTTACAGTAAAGAGTGTGTCGGGTAACTTGTACATCAGTTGT  
AGTAGAAGATCCGGATCCACTTCTGCAGAAGCTTTAATACTAGGATGCCAGCTGTAGTTGTGCTATTA  
GGAGTGAATGTTTTCACTAGTTTTTTTTCTGCTCAGCGATAGAGTTGGCAGATGTTGGAGCTGAAAGAT  
TATTAAGCGTGATGGTATAGGTTGTTGTTATCCAAATAGAGTCCATAGACCTTGATAGCCGTAGTGTGG  
AGGAGAAGTAGAGAAGTATTCAGAGAAATTTGCCAATTGGGGCCTAATTGCCCATCATTAGTGGTTCT  
ATGGATAGAATGGTTGTTCTGCTTTCCCTCTGGAGAGGTCCATACTGTGCTAGACTGATTCATAATTTT  
CGTCTACAATTGAAAGGCGCCCATTAAGATAATCATTGGAGTCTTATACTACTTGTGCTTGATGAGT  
TTGGCCGGTATCAGTATTTTTGGGTATATCTTGTGGGTGACGCGAATACAAGGCGGACTCTCCCTCT  
TTGAGAATAATGGGTAAAATAACACCAAGATTTGTAATATTGAGCTTACCGTCTTTCCAACAGTCAGCG  
TAGCGCCGCTTCTAAAGCAAGTAGACTAGTTGGATTCTGGGTAAAAGGATGTCAAAAATTCAGTTC  
AGCACCATCTTCTATGGCTAAAGTGCCAAATTTCAAGGTAGTAGGAGCCTCTCTAATAAATTATGTTCT  
GTTCCATAAGAGTTTTTATGTCGCTGGACATTTGTTTATAAGAGAATACAACAGCTCCAGAGAACTCTT  
CTATAAGATTAATAGTATTACATTTCTACTACTGGGAGTACTTGAGCATTATTAGGCTCTCGCACACG  
CTCCATTGAAAAAGATCATAAAAGTAGATACAGTATCTTCTTTAGCCCCAAGGATAGTGTATAAGGT  
GTCTGCGTGTATTATTAATATGAAAAAGTTTTTCGATCCCTAATAAGTTCGCATCAAATTTAAATACGA  
CATTATTATTAACAATATCGCCTGTCCCTGTATGGATATAATTTGTGGCCGACGCAGTTTCGATAA  
ATTAAGGCTGCTCCCAGGCAGCAGAGTTATTTAGAAAATAGATAGGACCCTTATTTCGGATGTCAATG  
TAACCACAGTCAATAGCTCCCCGGCATGAGCAGCGGTATTGCTATCGAAATAGATAGGACCCTTATTGT  
TTTTGTAAGTAAATCCTTGTGCTGTTGAATGGCTCCTCCGTTACTTGCATGAGTAGATTTGTTCCATCC  
TATGGAATATTGTTGAAAAACAATTCCTTTCTCATTATTGCTAATGACGCATGGGTAGCGCTAATA  
GCTCCGCTTTCCACCTTGTTGTAGTTAAAAATATGGGACCAGATTATTACTAATAGAGCAAGAGC  
TTTTCTGCTACAGATTGCTCCTCCTCGAGCCATATTTTCGGCTCGCGTATCTGGTATATGATTAAGCGT  
GTGATTGTTCTCAATAAAACTCTTTAGCAGTATCAGTTATTGATATTTGAGTGTAGCGGGGATAGCT  
CCCCCGCAGTCTCCAGACATATTGTTAATAAAGGCGAGAGTTCGATTCCTGTGAGAGTATTCCTTG  
CATAAAGCGCACCACCTATTTTTTTTCGTTTTTATTTCTGTCCCGTATATTGAGCTCCGGCTGTTGT  
GTTATTATAAAAAAGTACGTCTTGATTATTCGAGAACCAGATAGGGCCTTTAGAACAGATAGCTCCTCC  
CCCTGTTATGTGTGCAGTAGTTGTTGCAAAAAGAGTTAGCATTATTAGAGGCGTGAATGAGATAG  
TAACCATATCAAAAACCTCCAGCAGCAGAGGTAGTGTAAATAAGATAGAAAAGATTTGCGTTGCGT  
ATTGCTGCAATAGTGCAAACTCTCTTCCCATGAGTTTATATTGAAAAGGTGACATTTTGAGCAGTA  
ATTAAGAGACAGGATCTAGGACGAACTGAATCTCTGTCCGAAAAAGTAAATCGCCGAACTGTAGCG  
TATCCGTTTCATTAGCTTGCAAAATGGATATAGTTGAAAGATAAAAAAACTGAGGCAAGCAAAAGATAG  
AGAAGTTCTTTAATCATCGCAGGTTAAAGGGGGGATGTTATTTAGCCTGCAAAATAGTGAATTTATGG  
ATTTTTGTAAGAGAAAAGGACGAATGCGCTGAAGATAAGAACATTTATTGATATTAATTTATTTT  
TATGAAGCGAGTAAATTAATTTTATCTCTCAGCTTTTGTGTGATGCAACGCTTTCCATAAGTTCTTTC

TTTCAATGATTC TAGCTTATTC TTGCTGCTCTTTAAATGGGGGGGATATGCAGCAGAAATCATGGTTCC  
TCAAGGAATTTACGATGGGAGACGTTAACTGTATCATTTCCCTATACTGTTATAGGAGATCCGAGTGGG  
ACTACTGTTTTTCTGCAGGAGAGTTAACATTAATAAATCTTGACAATTC TATTGCAGCTTTGCCTTTAA  
GTTGTTTTGGAACTTATTAGGAGT TTTACTGTTTTAGGGAGAGGACACTC GTTGACTTTTCGAGAACAT  
ACGGACTTCTACAAATGGGGCAGCTCTAAGTAATAGCGCTGCTGATGGACTGTTACTATTGAGGGT TTT  
AAAGAATATCC TTTTCCAATTGCAATTCATTACTTGCCGTA CTGCCTGCTGCAACGACTAATAAGGGTA  
GCCAGACTCCGACGACAACATCTACACCGTCTAATGGTACTATTTATTC TAAAAACAGATCTTTTGTTACT  
CAATAATGAGAAGTTCTCATTC TATAGTAATTTAGTCTCTGGAGATGGGGGAGCTATAGATGCTAAGAGC  
TTAACGGTTCAAGGAAT TAGCAAGCTTTGTGTCTTCCAAGAAAATACTGCTCAAGCTGATGGGGGAGCTT  
GTCAAGTAGTCACCAGTTTCTCTGCTATGGCTAACGAGGCTCCTATTGCCTTTGTAGCGAAT GTTGCAGG  
AGTAAGAGGGGGAGGGAT TGCTGCTGTT CAGGATGGCAGCAGGAGT GTCATCATCTACTTCAACAGAA  
GATCCAGTAGTAAGTTTTTCCAGAAATACTGCGGTAAGT TTTGATGGGAACGTAGCCCAGT AGGAGGAG  
GGATTTACTCCTACGGGAACGTTGCTTTTCTGAAT AATGGAAAAACCTTGTTTTCTCAACAATGTTGCTTC  
TCCTGTTTACATTGCTGCTAAGCAACCAACAAGTGGACAGGCTTCTAATACGAGT AATAATTACGGAGAT  
GGAGGAGCTATCTTCTGTAAGAAT GGTGCGCAAGCAGGATCC AATAACTCTGGAT CAGTTTCCCTTTGATG  
GAGAGGAGT AGTTTTCTTTAGTAGCAATGTAGCTGCTGGGAAAAGGGGAGCTATTTATGCCAAAAAGCT  
CTCGGTTGCTAACTGTGGCCCTGTACAATTTTTAAGGAAT ATCGCTAATGATGGTGGAGCGATTTATTTA  
GGGAATCTGGAGAGCTCAGTTTATCTGCTGATTATGGAGATATTTATTTTCGATGGGAATCTTAAAAGAA  
CAGCCAAAGAGAATGCTGCCGATGTTAATGGCGTAAC TGTGTCTCACAAGCCATTTTCGATGGGATCGGG  
AGGGAAAATAACGACATTAAGAGCTAAAGCAGGGCATCAGATTCCTTTAATGATCCCATCGAGATGGCA  
AACGGAAAATAACCAGCCAGCGCAGTCTTCCAAACTTCTAAAAATTAACGATGGTGAAGGATACACAGGGG  
ATATTGTTTTTGCTAATGGAAGCAGTACTTTGTACCAAATGTTACGATAGAGCAAGGAAGGATGTTCT  
TCGTGAAAAGGCAAAATTTATCAGTGAATTC TCTAAGTCAGACAGGTGGAGTCTGTATATGGAAGCTGGG  
AGTACATTGGATTTTGTAACTC CACAACCACCACAACAGCCTCCTGCCGCTAATCAGTTGATCACGCTTT  
CCAATCTGCATTTGTCTCTTTCTTTCTTTGTTAGCAAACAATGCAGTTACGAATCC TCCTACCAATCC TCC  
AGCGCAAGATTC TCATCCGCAGTCATTGGTAGCACAAC TGTGTTCTGTTACAATTAGTGGCCCTATC  
TTTTTTGAGGATTTGGATGATACAGCTTATGATAGGTATGATTGGCTAGGTTCTAATCAAAAAATCAATG  
TCCTGAAATTACAGTTAGGGACTAAGCCCCAGCTAATGCCCATCAGATTTGACTC TAGGGAATGAGAT  
GCCTAAGTATGGCTATCAAGGAAGCTGGAAGCTTGCCTGGATCC TAATACAGCAAATAATGGTCTTTAT  
ACTCTGAAAGCTACATGGACTAAAAC TGGGTATAATCC TGGGCCCTGAGCAGT AGCTTCTTTGGTTCCAA  
ATAGTTTATGGGATCCATTTTAGATATACGATCTGCGCATTCAGCAATTC AAGCAAGTGTGGATGGCG  
CTCTTATTGTGCGAGGAT TATGGGT TTTCTGGAGTTTCGAATTTCTTCTATCATGACC CGCATGCTTTAGGT  
CAGGGATATCGGTATATTAGTGGGGTTATTCCTTAGGAGCAA ACTCCTACTTTGGATCATCGATGTTTG  
GTCTAGCATTACCGAAGTATTTGGTAGATCTAAAGATTATGTAGTGTGTCGTTCCAATCATCATGCTTG  
CATA GGATCCGTTTATCTATCTACCC AACAAAGCTTTATGTGGATCC TATTTGTTCCGAGATGCGTTTATC  
CGTGCTAGCTACGGGT TTTGGGAATCAGCATATGAAAACCTCATATACATTTGCAGAGGAGAGCGATGTT  
GTTGGAT AATAACTGTCTGGCTGGAGAGATTGGAGCGGGAT TACCGATTGTGATTACTC CATCTAAGCT  
CTATTTGAATGAGT TGCCTCCTTTCTGCAAGCTGAGT TTTCTTATGCCGATCATGAATCTTTTACAGAG  
GAAGGCGATCAAGCTCGGGCATTC AAGAGCGGACATCTCCTAAATCTATCAGTTCCTGTTGGAGT GAAGT  
TTGATCGATGTTCTAGTACACATCC TAATAAATATAGCTTTATGGCGGCTTATATCTGTGATGCTTATCG  
CACCATCTCTGGTACTGAGACAACGCTCCTATCC CATCAAGAGACATGGACAACAGATGCCTTTTCAATTA  
GCAAGACATGGAGT TGTGGTTAGA GGATCTATGTATGCTTCTCTAACAAGTAATATAGAAGTATATGGCC  
ATGGAAGATATGAGTATCGAGATGCTTCTCGAGGCTATGGTTT GAGTGCAGGAAGTAGAGTCCGGTTCTA  
AAAATATTGGTTAGATAGTTAAGTGTTAGCGATGCC TTTTTCTTTGAGATCTACATCATTTTGTTTTTTA  
GCTTGTGTGTCTCTATTCGTATGGATTC GCGAGCTCTCCTCAAGTGTAAACGCCTAATGTAACC ACTC  
CTTTTAAAGGGAGACGATGTTTACTTGAATGGAGACTGCGCTTTTGTCAATGTCTATGCAGGAGCTGAAGA  
AGGTTCGATTATCTCAGCTAATGGCGACAATTTAACGATTACCGGACAAAACCATA CATTTATCATTTACA  
GATTC TCAAGGGCCAGTTCTTCAAAAATATGCCTTCATTTTCAGCAGGAGAGACACTTACTCTGAGAGATT  
TTTCGAGTCTGATGTTCTCGAAAAATGTTTCTTGGCGAGAAAAGGGAATGATCTCCGGGAAAACCGT GAG  
TATTTCCGGAGCAGGCGAAGT GATTTTCTGGGAT ACTCCGTGGGGTATTCCTCTTATCTACTGTGCCA  
ACCTCATCATCAACTC CGCCTGCTCCAACAGTTAGTGATGCTCGGAAA GGGTCTATTTTTTCTGTAGAGA  
CTAGTTGGAGATCTCAGGCGTCAAAAAAGGGGT CATGTTGATAATAATGCCGGGAATTTCCGGAACAGT  
TTTTCGAGGTAAGAAT AATAAATAATGCTGGTGGTGGAGGAGTGGTTCCGCTACACCATCAAGTACGACT



TTTACAGTTAAAACTGTAAAGGGAAAGTTTCTTTACAGATAACGTAGCCTCTTGCGGAGGCGGAGTGG  
TTTATAAAGGCATTGTGCTTTTCAAAGACAATGAAGGAGGCATATTC TTCCGAGGGAACACAGCATAACGA  
TGATTTAAGGATTC TTGCTGCTACTAATCAGGAT CAGAATACGGAGACAGGAGGCGGTGGAGGAGTATT  
TGCTCTCCAGATGATTC TGTAAGTTTGAAGGCAATAAAGGTTCTATTGTTTTTATTACAACCTTGCAA  
AAGGCAGAGGCGGAAGCATCC TAACGAAA GAATTC TCGCTTGAGCAGATGATTC GGTTGTCTTTAGTAA  
CAATACAGCAGAAAAAGGCGGTGGAGCTATTTATGCTCCTACTATCAATATGAGCAC GAATGGG GGATCG  
ATTC TGTTTTGAAAGAAACCGAGCTGCGGAAGGAGGCGCCATCTGCGTAAGCGCAGCGAGCTCTGGTTCGA  
CTGGCAAGCTCACTTTAAGCGCTTCTGATGG GGAT ATTGTTTTTTCTGG GAAT ATGACTAGTGATCGTCC  
TGGAGAGCGCAGCGCAGTAA GAAT TTTAAGCAGTGGAACAACAGTTGCTTT GAAT GCTTCC GGAT TATCG  
AAACTGATCTTTCATG ATCC TGTAAGTACAAAATA ATTC AGCAGCGGCTGCATCGACACCATCACCATCTT  
CTTCTTCTACGCTGCTGCAGTACAATTAATCAGTCCGGTAAT GGAT CTGTGATTTTTACC GCC GAGTC  
ATTG ACTC CTTCAGAAAACTTCAAGTTCTTA ACTC TACTTCAAATTTCCCAGGA ACTCTGACTGTGTCA  
GGAGGG GAGT TGGTTGTGACGGAAGGAGCTACCTTAACTACTGGGACCATTACAGCCACCTCTGGAC GAG  
TGACTTTAGGATCC GGAGCTTCGTTGTCTGCCGTTGCAGGTGCTGCAATAATAATTATACTTGTACAGT  
ATCTAAGTTGGGGAT TGATTTA GAATCC TTTTTA ACTC CTAACTATAAGACTGCCATACTGGGT GCGTAT  
GGAACAGTTACTGTTAAAAGAGGCTCTACTTTAGACCTAGTGATGGA GAAT GAGGCGGAGGTCTATGATA  
ATCC GCTTTTTGTG GGAT CGCTGACG ATTC CTTTTGTT ACCC TATCTTCTAGTAGTACTAGTAACGGGT  
TACAATGAAGCGTGTACTATTAATGATGCAGATGCTGCGCACTAC GGGT ATCAAGGTTCTTGGTCTGCA  
GATTGGACGAAACCTCCCTTAGCTCCTGATGCTAA GGGT ATGGTGCCCTCCTAATACAAGTAATACCTTAT  
ATCTGACATGGAG ACCCGCTTCCAAC TACGGG GAGT ATCGATTAG ATCC TCAGAGAAAGGGG GAAT TGGT  
GCCCA ACTC TCTTTGGGTAGCG GGAT CTGCATTAAGAACCTTTACTAATGGTTGAAAGAACACTATGTG  
TCTAGAGATGTT GGAT TTGTAGCATCTCTGCATGCTCTCGGGGAT TAT ATTC TGAAT TATACGCAAGATG  
ATCG GGATGGCTTTTTAGCTAGATATGGGGGATTC CAGGCGACTGCTGCCTGCCATTACGAAAATGGGT  
CAT ATTCGGAGT GGCTTTTTGACAAC TATATGGTCAAACAAAAAGCC GAAT GTATT ACTC CAAGGATGCA  
GGGAACATGACGATGTTGTCTGTTTCGGAAGAAGTTACGTAGATATTAAGGAACAGAACTGTTGTGT  
ACTGGGAGACAGCTTATGGCT ATTC TGTGCACAGAAT GCATACGCAGTATTTTAATGACAAAACGCAGAA  
GTTTCGATC ATTC GAAATGTCATTGGCACAACAATAACTATTATGCGTTTGTAGGTGCTGAGCATAATTC  
TTAGAGTACTGC ATTC CT ACTC GTCAGTTCGCTAGAGATTATGAGCTTGCAGGGT TTAGCGTTTTGAGA  
TGGCTGGAGGAT GGTCAGTGTACACAAGAACTGGTTCCTTAAC TAGATATTTCCGCTCGAGGAGCGGG  
GCATAATATGTCTCTCCCAATAG GAAT TGTAAGTCTATGCAGTTTCTCATGTACGAAGATCTCCTCTTCT  
AAACTGACGTTAAATATG GGAT ATAGACCAGACATTTGGCGTGT C ACTC CACATTGCAATATGGAAATTA  
TTGCCAATG GAGT GAAGACGCCTATACAAGGAT CTCCGCTAGCACGGCATGCCTTCTTCTTAGAGTTCA  
TGATACTTTGTAT ATTC ATCATTTTGGAAGAGCTTATATGAACT ATTC ATTAGATGCTCGTCGCACAA  
ACGGCACATTTTGTATCTATGGCTT GAATAGAAT CTTTTAATAAAGATTTTTCTTTTCAGAAAGTGGGT  
CTGATCC CAGGAATTC TTTGTGTCTTCTCCTATTTGAGGTTGTTTCATGCATTTTCGATGATAGGGGAGGG  
CGGATGGTATAGAAAAAAGGGAAGGCTCTTA GAAT TTTAGAGAGCAGGAT CTTTTGTTTGAATC AAACA  
AAAGGATGAGCTTTTTTTTTCATAAAAA ATTC TTTTACGCACGTCTAGTTTTGAACAGGTCTTTAGCAGAG  
TACATAAAGACAGAAT TATGTTCTAGGTGAGCTCGTAAGAAGACATGTTGTAAGGACAACCTCTATACTA  
GGATGGTAATCTTTATTTTAATAATAAAAAAT ACTC CT GAATTC AGATAAAAATAGCCTTGTTTTTATTA  
AATCC ATTTTGTCTTTTAAACAAAATCAAGGT GAAT CATGGTTTGTCTTTACGAAATTGCTGCACCTTCTC  
ACACCAGCACGGA GAAT TTGCCTATGGAAGAGACTTCTCCTCTTGTAGAAGCAATAGTACAGGCTGTGCA  
AACATGCTTAACCGTAGCTAAGCACACAGAGAACGCTAAGGTTTATAATCAAAAACGAAAAAGATATCAT  
CAAACA GGATGCTGGAGACAATTAAAAAAT TACTGTGTTGCTGTTGTCCAAAAGAAAAGCCGGTATCAG  
GAT CGATTACTGCGCTCTCGCTCT GGAT GCAGTCACAT ATCC CTACGCGTGGTTTGTAGTTGTAGGTTA  
TGCGGTATATAGTT CAG GAGT ACGTTGGGAAGCGATCTTGAAGGAGAGACTTTATCTCCTGGAGATAGA  
GCGCAACTAGATGCCTGTTTAGA GAGT GCTCAAGTTAGGTTAGCTGGTTTGTGTTGAACTATTGGGACG  
GAGATTTTCCGGCTATGGAACATCGGGAGGGAG ATTC TCGCCTA GAATGCAAGAAGATATAATCGCCAG  
GTTTCGAGACAAAGTTG GGAT CTGTGAGCTTACAGATGCGGTTGCTCTGAAACACTTCTGTGGGAGAACT  
TAAATGTGATACGCGACGTGAGAAAAAATGAAAAGTCTTAGAGAAGGGCCTTAAGACTTTTCTCAAGC  
TCTAAAACGCAATGCTAGGCAAGGGAAC TAGAACCTGTAAGTGGTCCCAG ATCC AGG GAGT AACTATGG  
CTTTGCCACGCAGCACACAAGACACATTTAACAGCGTCTGAAGTCTGTGTAGAGCTTTTTGATTC GTAA  
GCCGGAACATGTAGGCTCGT GAATCC AAGTTCCCATAGGAGC ATCC CAGGAGACGGCATTTTTT GAGTAA  
CACTACAGGTCCC ATTC CACATCACGTTT CAGGTCTT GGAT GTAGGCTCCTAGAAAGTAATAGTAGGTT

CGTGTTTTTTGGGATTTTTTTTTCAAATGTTATTCCTATAGGAAGTGAAATATTTCTGAAAGAGCTGGCAG  
AAAAGGACC GAATCTCTCCCGAACTCTCCTCAAAACCGTCCTGTGTTCCCTGAAAATCCTTGCAGTTTAGA  
GAAAATAGAGAAGGAGCTGAACAGTCCGGAACCATTGGATACAATAGGAATCGATGCGCACACTTCTCCG  
GATACTGCAACGCTATGCCAGGATCCGAATCCTTCTTTAGAGAAGGAGCGATATTTTGTTTTTAGCTCAT  
GGATACTTTTCATTGTAGCATGCCTGTGCAGAGATTTTCATTAGAGAGGTAGCGAGTTGCGCTGTACAGT  
AGCTATATAGGAGGTCGTTTCTGTAGACGTAATAAAGGAATCGGACGATTTCCCAGTAAATTGTCCCTGCA  
GCCAAGCAGAAA GAATGGTCATCTAACTGTGAGTACTGATACC GAATAGGTAGCCAAGGCTTCTATGAT  
GCCAATTATCGATAGGTTTCCCAGAGCTGTGCTGAACATA GAATAAATTAGAAACAGCAGATCCCCACGT  
TCCAAATAGATAGGCTCCTCCGTGCGCTGTTGTATTAATCATCGACTGCACAGCTTGCATATCG GAATAG  
GTGTTCCAAAGAGTGTTCGCAAC GAGTGTAGATTGACGTTCTGGATGAGGCACATAGTTTTTAGGCGTCC  
AATTAGCAATCAGA GAATGCCCTTCATCA GAATCTTTCCAAGAAAAAGTCCAATCTCCTTGATATCCAAA  
GTGAGAAGAGAGGTTCCCATCAGGAAGATGTAATGAGATTGCTCTTTAGGGA GAGTAAGGAGAG GAATA  
TTGTTTTGCTCTTTACTGAGAAGCTCTACATTTTCATAAAAATTC TCATCTCCAGGTTAGAGAGGAAGA  
TCTTTTGGATAGAAAAGATTAGGGGCGTGGATAGTTACGTTTTTTTCAGTATCTAAG GAATGAAGGGGAAT  
ACTTAGCGTAGCTAACTTCAAATCAGAGGAAGTTTTTAAAGAAGTCCCCTTCCATAATGAGGAGAGCT  
TGA GGTCC TGAGAGAGAGAAGGCGGAAAGGACAGCGCGATCTTTTAAACTAAGCGTCCGGATTTCA  
GTTTCGATAGGCTGCTGTAGTTGGGAAGTGAGGTTATCAG GAGT TTTTTCTTCTCAGAAAGACGTTTCGCT  
CGAGAAAATCACTGAACGGTTTTGCAC TTGTCT GAATAACTAAAGGAGATGCGGTGGCTGGGGTGGGAGAA  
GTCACGCTGGCTTGCAAAGAGGAGGGAAGAGGCGATTCTTTGCTGCTACTTTCTTGTACAATA GGATCAA  
AGAAA GAATATCTCCGTTGCGAGCTTCTAAGGAAGAAA GAATCGCATCTTTCTCTAAGTAGATGGCGTT  
TCTTACTAGACCTTGGTCGGAGGTGCGTTGG GAGT TATTC TGGAACAGAACAGATCC TTCACCTGCAAGG  
ATAGAGAGACTCCTCCGACT GGATGGCGATAGCTCCACCTATTTTAGCGCTGTTGTTAATGAAGGAAA  
CAGGACC GTTATAACGCAATACCATGTGCTTGGCATAAATAGCCCCGCTTTTTCTTTAGCAGAAT TGCT  
TGCAAATAGCGTTTCTTGGTTACAAGCAAGAGAGAGAGAGCCTTTTTCTGAGGTGTTTAGATCGCTGATA  
CAACAAATAGCGCCTCC ATTCGTGGCG GAGT TCCAGTGAAAAAGAGA GGGT TAC ATTCCTGAACAAA  
TAAGATTACTACAGCAAATAGCGCCGCATTTAAATCCGCACGATTACGGGCGAAAGAAATAGGCGACAC  
ATTTCTAGATAAAGAGAAGGTTTGAGCCT GAATGGCTCCGCATTTCTTTAGAA GAATTCCTTCAAAA  
GCTGTGAAAAGATAGTTGTGCTGTAGAGAAAAGGC ATCCGCAGAGATGGCTCCTCAGAGCCTTACGCAT  
GATTTGACAGAAA ACTCATGCTACCATTATTGCGCAAGGATAACTGACC ATTC TTTTGATGAATAATAGA  
AGGAGAGCTTTCTTGAAGAGCAATCTGTGAAGGAAAGGAAGCGAAAGTTTT GAATGGAAAGATCTCCT  
TTTTCTTTAAAAAGAGCCTCTTTGGGTCGTGATATG GAGT TTAGATACGAACCAACAGTAG GAAT TTC  
CAAGTACATACAAAA GGATCGTCTTGTGATGCATGAGCACAAAGAGCAGGAAAGAGGCTCTCCATGGTACA  
GTCTCAAAAATGTACAGACGACATGATTA GGAT TTTTAGTGAGGAGGGCGGTTTACCTAAG GGATCC  
TGGCCAAAGAGGACCCTGTGGATGACAAAATAGCAGCACATAGACAACAGAAGTTCATATGATCAGGTC  
GCATGGGATCC CCCCTAAGAGTCTAAAAGAAGAGGTTATGTCAAAAAAAGTAATAATTTACAGACTTTT  
TCCTCAAGGGCTCTGTTTCATGTCTTTCAAGATGAA GAGT TAAGGAAGATTTTT GGAT TGTGAAATTAGA  
AAAATCA GAAT TATCAAATTAGATAGTTTTTAAAAAATTAATAATCTTTAAGAAATCTTATATTTATT  
ATCGATTTTTTTAATTTTAATTTTTAAAATTAATAAAGTTTTATTTTAGTTTT GGGT TGGTTGTTAT  
GAGCATCGGGG GAGTAGGAGGCAACGG GAATAGTC GAATCCCTTCTCATAATGG GGATGGATC GAATCGC  
AGAAGTCAAAATACGAA GGGTAAATAAAGTTGAAGATCGAGTTC ATTC TCTATATTCATCTCTTAGTA  
ACGAAAATAGAGAATCTCCTTATCCAGTAGTAGACGTCAGCTCTATGATCGAGAGCACCCCAAC GAGTGG  
AGAGACGCCAAGAGCTTCGCGTG GAGTGTTCAGTCGTTTCCAAAGAGGTTTAGGAC GAGTAGCTGACAAA  
GTAAGACGAGCTGTTCAAGTGTGCGTG GGGTTCAGTCTCTACAAGAAGATCGTCTGCAACAAGAGCCGTAG  
AATCCGGATCAAGTAGTCGACTGCTCGTGGTGCAAGTTCTGGGAGG GAGTATTCCTCTCAGCAGCTAG  
AGGGCTGCGTCTTATGTTACAGATTTCTGGAGA ACTCGGGT TTTACGCCAGACCTCTCCTAT GGATGTA  
GTTTTTGG GAATCTTGATGTGAACGAGGCTCGTTTGATGGCTGCTTACACAAGT GAGT GCGC GGAT TATT  
TAGAAGCGCACGATTTGGCTGGCCCTGACG GGGTAGCGGCCGCCGGGAAATGCTCAAAGATGGGATAA  
AAGAGT TAGAGATCTACAAGATAAAGGTGCTGCACAAAATTAATAATGATCC TTTAGGCCGACGAACA  
CCTAATTATCAGAGCAAAA ATCCAGGT GAGTATACTGTAGG GAATTC CATGTTTTACGATGGTCCTCAGG  
TAGC GAATCTCCAGAACGTCGACACTGGTTTTTGGCTGGACATGAGCAATTTCTCAGACGTTGTATT ATC  
CAGAGAGATTC AAACAGGGCTTCGAGCACGAGCTACTTTGGAA GAATCCATGCCGATGTTAGAGAATTTA  
GAAGAGCGTTTTAGACGTTTTGCAAGAACTTGTGATGCGGCTCGTACTGAGATAGAA GAATCG GGATGGA  
CTC GAGAGTCCGCATCAA GAATGGGAGGCGATGAGACGCAAGGACCTTCTAGAGCACAAACAGCTTTTCA

GAGCTTTGTA AATGAATGTAATAGCATCGAGTTCTCATTGTTGGGAGCTTTGGAGAGCATGTGCGAGTTCTC  
TGCGCTAGAGTATCACGAGGATAGTTGCGCGAGGAGAGGCGATTCGCCGTTGCTTCTCTTGTGTAAAG  
GATCGACGCATCGCTACGCTCCTCGCGATGACCTATCTCCTGAAGGTGCATCGTTAGCAGAGACTTTGGC  
TAGATTCGCAGATGATATGGGAATAGAGCAAGGTGCTGATGGAACCTACGATATTCCTTGGGTAGATGAT  
TGGAGAAGAGGGGTTCCTAGTATTGAAGGAGAAAGGATCTGACTCGATCTATGAAATCATGATGCCTATCT  
ATGAAGTTATGAATATGGATCTAGAAACACGAAGATCTTTTGGGTACAGCAAGGGCAGTATCAGGACCC  
AAGAGCTTCAGATTATGACCTCCCACGTGCTAGCGACTATGATTTGCCTAGAAGCCCATATCCACTCCA  
CCTTTGCCTTCTAGATATCAGCTACA GAATATGGATGTAGAAGCAAGGTTCGGTGAGGCAGTTTATGCTT  
CTTTTGTAGCAGGAATGTACAATTATGTAGTGACACAGCCGCAAGAGCGTATTCCTAATAGTCAGCAGGT  
GGAAGGGATTCGCGTGATATGCTTACCAACGGGTACAGACATTTAGCAACCTGATGCAGCGTTGGGAT  
AGAGAAGTCGATAGGGAATAAAGTGGTATCTACCATAGTTTTGTATCAAAAACTAAGCCACCAAGAAG  
AAATTCCTTTTGGTGGGCTTCTTTTTTTATTCAAAAAGAAAGCCCTCTTCAAGATTATACCAAGATGG  
ATGTATAATCTGAAAGGAAGGCGTTTTATTCCTATCCATATGATGGTGGTGGCATCCCTCTTTAGAGGA  
GCAGCAGTCTTCATGACGTTTTTTGAAGCAGCATTTCAAGAAGTTTAGGCAGACCATAACCCAGCGATT  
CCCGTTACTACATAAGCTGCTTGTGTCCACATGGTTCCCTTACCAAGCAGGTGAGTAAGTAGGTTTACCT  
TATACCCGTACTCTAAAATTCAGTGTATTATAGCTCCGAGAACAACAATAAGAGAAGATAATCCCTCT  
ACAACTTTACAAAGCATGACGCTCTCCAACGTAGATGTATACTTA ACTCTGACTTTTTAATCTTTTTTA  
CAATTTAATAAAGTCTTTTTTTTGTCTCTCTATTAAAGATGCGTTTTGCTGTGCGAAAAGACGTTTCAAGT  
AAGAGTGTTTTTTAGTGTAAAAAAGTACGAAGGATTTTATTCGTATAAGATCATGATTGACCATGTTTAG  
GATGGAAGATGACAGAGT CATATGTAAACAAAGAAGAAATCATCTCTTTAGCAAA GAATGCTGCATTGGA  
GTGGAAGATGCCACGTGGAAGAGTTCGTAACATCTAT GAATGACGTCATTGCTTTAATGCAGGAAGTA  
ATCGCGATAGATATTTGGATATCATTCCTTGAAGCTACAGTGCATCATTTTCGTTGGTCCAGAGGATCTTA  
GAGAAGACATGGTGACTTCGGATTTTACTCAAGAA GAATTTTTATCTAACGTTCCCGTGTGCGTTGGGAGG  
ATTAGTCAAAGTCCCTACAGTTATCAAATAGGTGGAATCGCTATGTATCGTAAAGAGT GCTTTAGAATTA  
GAGATGCTGTAGTGAACAGAGAGCTTTCAGTTACAGCGATTACAGAATATTTTTATCATCGTATAGAAAG  
TCATGACGAACAGATTGGAGCTTTTCTTCTCTCTGTAAAGAGCGGGCTTTGCTTAGAGCTTCACGTATA  
GATGACAAACTAGCAAAGGAGATCCAATAGGGTTACTAGCAGGAATCCCTATCGGAGTTAAAGATAATA  
TTCATATCACAGGAGTGAAAACAACCTGTGCTTCGAAAATGTTGGAAAACCTTCGTGGCTCCCTTTGATTC  
CACGGTGGTGAGACGTATAGAGATGGAAGACGGGATTTTACTGGGTAAGTTGAACATGGATGAGTTTGGC  
ATGGGATCCACA ACTCGGTATTCGCTTTTATCC TACCAATAATCCTTGGGATTTAGAACGAGTTCCAG  
GGGTCTTTCAGGTGGATCCGCGGCAGCAGTTTCGCGGAGGTTCTGTCTATCGCGTTAGGATCGGATAC  
CGGAGGATCGATTCGTCAACCAGCAGCATTTTGTGGAGTTGTTGGATTTAAACCTTCCTATGGAGCAGTT  
TCTCGCTACGGATAGTCGCTTTTGGATCCCTTTAGATCAGATTGGACCATTGACAACGGTGGTAGAGG  
ATGTGCTCTGGCAATGGATGCCTTTGCTGGTGGTATCCCAAAGATTC CACTACGAGAGACTTTTTTAA  
AGGGACGTTTTTCGAAGCCTTGTCATTGGAAGTTCCTAAGTTAATCGGAGTTCCTAGAGGATTCCTAGAC  
GGACTGCAAGAAGATTGTAAGAAAACTTTTTCGAAGCTCTTGTGTTATGGAACGTGAAGGCAGTCGCA  
TTATTGATGTAGATCTCAGTGTTTGAAACATGCGGTACCTGTTACTATATTGTTGCTTCTGCAGAAGC  
TGCCACAACTTAGCCGTTTTGATGGTGTTCGGTATGGTCATCGTTGTGCGCAGGCTGATAACATGCAT  
GAAATGTATGCGCGTTCTCGTAAAGAAGGCTTTGGAAAAGAAGTA ACTCGTA GAATTCCTTTAGGGAAT  
ATGTGCTTTCAGCAGAAAGACAAAACATCTTTTATAAGAAAGGAATGGCAGTTCGTGCTCGCTTAATAGA  
CGCTTTTCAAGCTGCTTTTGGAGCGCTGTGATGTGATCGCTATGCCTGTATGCGCAACGCCTGCCATCAGA  
GATCAGGATGTTTTGGATCCGGTTCTCTATATCTACAGGATATTTATACCGTAGCGGTAAACTTGGCCT  
ATTTACCTGCCATTTCCGTTCCCTCCGGACTGTCTAAAGAAGGCTCCCATTAGGTGTTCAATTTATTGG  
GAAAGAGGTTTGGATCAGCAGATTTGTCAAGTA GGATACAGCTTCAGGAAC ACTCGCAAATTAACAA  
TTATATCC TAAAGCAGTGAATGGACTTTTTGACGGAGGAATAGAAT AATATGGGCATAGCACATACTGAA  
TGGGAGTCTGTGATCGGTCTGGAAGTTCACGTT GAATTGAATACC GAATCCAAAT TATTTAGTCCCGCAC  
GTAATCATTTTGGTGATGAACCC AACACGAACATTTCTCCTGTATGCACAGGGATGCCAGGATCTCTCC  
GGTCTTGAATAAGGATGCTGTGCGTAAAGCTGTTTTGTTTCGGCTGCGCTGTAGAGGGGGATGTGCTTTA  
TTTAGCCGTTTTGATAGAAAATCC TATTTTTATCC TGACAGCCCAAGAACTTTTCAAGATCACCC AATACG  
AGCATCC TATCGTAAAGAGGTGGATGTATTCGTGCTGTAGTAGAAGGAGAAGAGAAAACCTTTGAGCTAGC  
GCAGACACATCTAGAAGATGATGCGGGGATGTTAAACATTTTTGGGATTTTTGCTGGTGTAGACTATAAC  
AGAGCAGGGGTTCGGTTAATTGAGATTGTTTTCCAAGCCTTGTATGTTTAGTGCAGAGGATGCTGTTGCAT  
ACGCCAATGCTTTGGTATCCATCC TCGGCTACATAGGTATTTCCGATTGTAATATGGAAGAAGGTTCTAT

CCGTTTCGATGTGAATATTTCTGTTCGCCCTCGAGGAAGTAGGGAGCTTAGAAAATAAGGTAGAGATCAAA  
AACATGA~~ACTC~~ATTTACCTTTATGGCACAAGCTTTGGAAGCTGAAAACGTCGTCAGATTGAA~~GAGT~~ATC  
TTAGCC~~ATCC~~CAATGAG~~GGATCC~~AAAAAAGTTGTTCCCTGCAGCGACTTATCGTTG~~GGATCC~~TGAAAAGAA  
AAAAACGGTTCTGATGCGTCTCAAGGAACGAGCCGAAGATTATATGTATTTTGTAGAGCC~~GGAT~~CTTCCT  
GTTTTGCAGATCACCGAGACTTATATTTGATGAGGTGCGTCAAACATTACCAGAGCTACCTCATAGTAAAT  
ATATGCGTTACATTACAGACTTTGATATCGCTGAAGATTTAGCAATG~~ATTC~~TTGTTGGTGATCGACATAC  
GGCTCATTTCTTTGAAACAGCAACTATGTCTTTGTAAGAACTATCGTGCTCTTTC~~GAAT~~~~GGAT~~CACAGTC  
~~GAAT~~TTGCGGGCCGTTGTAAAGCTAAAGGGAAGACGCTGCC~~ATTC~~ACGG~~GGATTC~~TTCTTGAAT~~GGGT~~TAG  
CGCAATTGGTGAACCTCATAGATCGTG~~GAGT~~GATCACAGGGAAAAATCGCTAAAGAAATTCAGATA~~GAAT~~  
GGTCTCTTCTTTTGGGGAAAGCCCAGAAGATATTTTGCCTAGAC~~ATCC~~TTCTGTTTACCTATGACGGAC  
GACCATGCGCTACGCGTATCGTTAAAGAGGTGGTTGCTCAAAAATACCGCGTCTGTAGC~~GGAT~~TACAAGA  
ACGGGAAAGCTAAAGCTTTGGGCTTTTGGTTGGACAGATCATGAAGCGAACAGAAGGGAAAGCTCCTCC  
TAAGC~~GAGTAAAC~~~~GAAT~~TGCTATTAGCAGCTATGCGAGATATGTAATTTGCAGC~~ATCC~~TCAAAAAAGGCA  
TAAAAGAGAAGA~~ACCC~~TCTTCATAAACTATGGAGAG~~GGT~~TCTCTTTTAAAGGCTTTATCGCTTTTCC  
AATATTATTTACGAGAG~~GGT~~TTCTTCTTTTGGAGAT~~GAAT~~CGGAAGA~~GGATTC~~CTC~~ATCC~~GAAG~~ATTC~~GCT  
GCTGTCTTGTCTTTGCTCTTGGTCTTTATTACGATGATGCTGAGCATTCTCTCGCTGCGAGAGAGCTTT  
ACGACGCGGCGTGTCTTTTTCGGAGAAGAAGA~~GGT~~TT~~GGAT~~GGAG~~GGGT~~~~ATTC~~CTGAGACATCTCCTG  
CAGCTACGGTTTCAAGAGC~~ATCC~~ATAT~~ATTC~~AGAAGAAGAGCTGCTGTGAGAA~~GAATTC~~GAGT~~CGGACAG~~  
TTCTTTATCGCTATTTGGTGG~~GAGT~~GTGGAAGCTAGAAGAAGAGGA~~GGATTC~~GGTATCTGAGCTTTGAGGA  
CTGACAGAAGTTA~~GAAT~~CTGCTCACTATCTGTAGA~~AT~~GTGTGGTTGTAGAGGAGAA~~GAGTGC~~~~ATCC~~GGTT  
GCATGGTTTGAATGTTTTGTGACCAACG~~GAAT~~AGGTATATAGTTTTTCTTCTGATTGCCCGTTTTCG  
CCAAGTCTTCCCTCTTTTCATCAAACGAGGG~~GAAT~~AGCGAACCTCTTCCAGAGCGGA~~GGAT~~TTGCTTTCT  
TTAGGAAGATGGCTCTCCAGGCAGCTA~~ACTC~~AACTTGTTCGAGCTTCTTCTGCTGTTTCCATTGCTCGC  
GATTACTGAGATATTGATAGGTC~~ACTC~~TATGCAGAGACATCAGAGCAAAGCCGAG~~GAGT~~CATAGAGCCAT  
TAG~~GAAT~~AGAG~~ATTC~~GCTAAGATTACAGCGCTCCGCCTACGGCAATAGCAGAAAACATCA~~ATCC~~AGCA  
GCTGTCCCTGTTA~~GGAT~~AAAAGGAAGAGAGACTGCCGCAACGGTATCAGCAATCTCTTTACTTTTCTG~~GG~~  
~~ATTC~~GGCAAGATCTGAGACTAGCAG~~GAGT~~~~GACTC~~CTAGGGCTCCAATAGCTAAGGCTGGAGCGATTGCAAA  
TAAGGCGAGCCAG~~ACCC~~TTGTGTCCAGAGA~~AT~~GAT~~ACTC~~ACAATACAGAGA~~AT~~ACTAATAGCTATAAGA  
GCAATATCGTAAACATAGCGTAGTTTGG~~GGT~~GACGATC~~GGT~~GCCGTCAGAAACCT~~GGAT~~AAAAGCCCTT  
TTACCTGTTGGGGAGATTGGGGAGGACTGGTGTACTG~~GAGT~~CATAAAATT~~ATCC~~CAAAAACAAAAAC  
GCT~~GAGT~~ACTAGA~~AT~~CTAGTATAAAAATAACCAAAGAGATTGGAGGGAGATAATTTTATTTGGTCGTAAA  
GATTTTAACTTACATAG~~ATTC~~TAGCACTTCTTATTAAGCGAAAAGCGTTGGGAAGGGGAGGCTGACT~~GG~~  
~~GT~~CGGCAAAGAGGGGCAGTTCAGATCGGGAGCAGAGGGAACGGGGAGCTTGGCAGCCGCTATTTTCGA  
TTTTAAGGGAAGAACCTGGTTTATGTTCTAAAGCTGGGAAAAGGT~~GGT~~GTAGATTTGGAAGCATGTCTC  
TACAGTAGCGAAAGCGATACTGACAGAGATCATAGGGAAAATAA~~ATCC~~TGGAGCCCAAGTGATACAACCT  
ACAATGCCCTACAATGGTAAGCGCTAAGGAGAAAAGGGACAGAAAGGTTGCTAGAACAT~~ATCC~~GGAGCA~~AC~~  
~~CC~~TGAAAGCTTTTATG~~GAAT~~AGGCAGGAGATCAGACCTCTGATAGGAAATACAAATAAGCCTGCAGCACA  
AAGCACAGGGAAAGTAATCAGTTT~~GAGT~~ATACCAAGAAGAA~~ATCC~~TGCTAAAGAGGCTAT~~GGAT~~AATGCT  
GCTTTA~~GGT~~ATTTTTGAGCTAGAGGGCTCATGTAGGCAGCGGCA~~ACTC~~TTTCAGGAAAACTAAATTTA  
AAAAGTGA~~ATCC~~TGTCTTTTATAGGTGCAACAGTGGAGGGCATTTTTCCAACCTAGGTGTTATGTATGGTA  
AGCCCGCATTGCGGGCACAAAAATTTATATGCGAGAGAT~~ATTC~~TGACAAAAATCGATAAATTTGTATCTA  
TTTTATTTATAGTTAATCAGTTTTGACTA~~GGAT~~TTACTAGCGAAGAAAAGCTTCTAAATGATTTATTTGT  
ACAATCAGTTCT~~ATTC~~TCAAGAACTATGCCAGAAGTTTGTAAAAATTTTATTAAGCAGTATGATCTACC  
AG~~ATCC~~TAAATATTTGTTTGACAAGAGGAAGA~~ACTC~~CCA~~ATTC~~TAGGGAGATAAGCTGATTGTATGATG~~G~~  
~~AGT~~GGTATGCTTAAAGTTCTTTTCCACACGATGACGTTTTTCGGGCATTTGTTATCGACGCCTATTTATA  
TCGTGCGAGATGCTTGTGGGAAAGATCG~~GGATGAGT~~ACAAGA~~ATCC~~TCCTCTGAGAGCTTTTTCTTTTGA  
GAGCCAGTTTTTTGCAAATAGAGAACGCAAA~~ATTC~~AAA~~ACTC~~TCCAGATCA~~ATCC~~TTA~~GGAT~~ATCGACAG  
GC~~GGAT~~ACCTCGTTGTTTGTACG~~ATTC~~CCGTTACCGAGATGTGCG~~GGAT~~TTCTTTTATCGTCTCGTTATT  
TAGGAGCTGAAGTCTCTTGGAAAAGCTCTAAAGAGCTGCAAGATACAG~~ATCC~~GCAAGCTGTAG~~GGAT~~ATTT  
CGCTTCCAAGACAAATCTTTTTATCAGTATATCATTGTCTGTAGGAGCCTACACACTAGCTCTTAC~~G~~  
~~AAAT~~TGGCAGTGGTCTGTACTTTTTTCTGGTATGGTAG~~ACCC~~TGAAAATATTGAGATTGGCTCAGG~~ACTCT~~  
ATCAGGTAGTTTTATCTTCAAAATATCATGCTTCGAAATCGTTATCTGTGATTATGG~~GAGT~~CATTAATGA  
GGTAGGGCTACATGATAAGCAAGCCTGGCCTTTATTA~~GGGT~~TCTCTTATAAACCTGAAGATAG~~ACTC~~ACA

CTCAATTGTATCTACCCGGTAAATTTTTCTGCAGAATACCAGTGCACACCTGTTTGGCATTAGGAGTAG  
CATATCGCCTGACACGACTTCGTAAAAAATTCCTAAAAATTC TTTGGCTACCTCTGAAGGAATTTTTGA  
GTATTCAGGAAGAGAAATAGAAGGGAATATCAAGCTGATTTTTTTGGCCAGGACAAAACCTCAAAATGTTT  
GGAGGCTATTCGCTAGGGAATGATATTTTCATTGGCAAATGCTCATAACGAAGACGAAAAGATCTACAAAT  
TCGGTCTTCGCTGTTCTTTGGAGCTTCTGCAAATTTGCATTTCTAACAAGGTAAGTTTGTCTATTGAT  
TGCCCGAACCAAGCACCTCATTGAATGTTTTGAAATGTGTTTTACAGACTTTTTCTAATACAACCTGTCC  
TTTTGTTATGAAGAATCTCTTTGGCTCGTTGCTTGACTTTCCCAGAAGCTCCTTTTAGAAGGC GGATTTGG  
TATTGAGATTCAGGGCGTGTATGGAAGAGAGAAAAGCTTCGCGAGCTAAGATGGAAGCTGCAGCTACCA  
CCACGTCTTGTTCTGCACGATGACGCTGGATTAATTC AATATCCGAGCGCTTCTTGCGAACAGCCTGTAG  
AAGGACTCTCTGAAGAGGC GAAT TGGTCTGAAATAGCAAAGACTGCTCCTGCA GGATGAGGAGCCAAA  
TTATCGATAATAGTGGCGTGTGTCCAAGCCAGGAGG GAGTTTTAAATTC TGGAAATGGCATATAGTGCCT  
TATATTTTTCTGGGAACAAGGTAATGACTTTACACGCACAAAGCGAGC GAATGTTTTGGGCTAAAGAAAG  
GATTTTAGCATCAG GAATGAGCTTAGAATCACAAATGCTGGTTTTATAAAGAGCTTCTATAGCTTGTGGG  
GAAGAAGCATATACTC CAGCAGTGCACAGAGGCCCAAAAAATCTCCTTTTCCAGATTCATCCACACCAA  
TGCGAGAACGTAATCC TGTGTGACGTTCTGTGAGGAGAACGTTTGTAGAATCTCTGGCTCAAGGAAAAA  
TTC TACAAATTC TTGAGTTCCTTT ACCC TGTACTACAATTTTCCAGATTGATATACAGTGCAGCTAACG  
GTCGGAGATCTTCTTGAATACAGTGTGGGGGG GGATAGAGATGGTGA ACCC TTTCTTTTCTAGTTGTT  
CTCGAAGTATAGAAAAATAAAGAAGGAGACAGTTGCGAAACGAAAAGAGGAGGGCATGATCACCTAAGAAAA  
AAGATTC TAATTTTAAGAAAAGGAAGAGCTGTTACCGTAGATTC TTTTCATATTC TATCATCC TGAAT  
CTTTATGATCGAAAAAATTTTTCTGCGAA GAAT AAAACCGTAAGTGTAAACGCTTGAGAAAAGTCTAGGAA  
ACTTTGATACTAAAAAAGAGGAAATCTAAGAGGCC TATTTATTTTCAGTAACGACAGCCTCCTTTCCTTTT  
TATGGGTAGAGAGCAAACCAGGG GAAT TACATGAGCGAACATGTCCACAAAGAGT TATTACATCTAGGGG  
AAGTTTTTTCGTTTCGCAAAGAGAAGAAAGAGCGCTTCTCTAAAAGATGTAGAAGCTGCCACATCTATTCG  
TTTTGCTGCATTAGAGGCTATAGAAGCAGGACATCTCGGAAATTAATTTCTCCTGTTTATGCCAAGGT  
TTTTATGAAAAAATACGCAGCTTTTTTT GGATAT GGAT GGATAGATTGCTGAAAGAGCATCC TTTATGTAT  
TGAAAAATTTTTTCAG GAAT TTTCTGATCAGAATATGGACATGCTGCTTGATTTA GAATCCATGGGAGGAAG  
AAATTC TCCTGAGAAAGCGATCC GTAGTTGGTTAAATCTAGGCTGGGCTGGAGTCTTCGTCGTAGGTGCA  
GCTTGTATTTGGTGGCTAGGGAATCTATTC AACCTTTTTCTAGAAC GGGTATCCACTC TTCGTAGTAECTT  
ATGAAAAC TTTGTATTAACGATTGTTTCTGTAGGAGAGAATCTTTTAGTTTCGTTACGCGTAAAGATTTTTC  
CTCGATCCGGTTC TTTTGTAAATGCAGGC GAGTCTTTCTAGACA ATCCGAATAAGTCCACAATGGCCGGGA  
AAAAGTTTGGAGCAGCTAACAGCTCTTCTTCTGAAGAGAAAAATGCAAAGAGTAGGGAGCAAAGCTATT  
TGCAAGAACTGTATCGGTAGCTCCTATAATTGCTAAGGAAAGAGAGCGCTCTGCATAAA ACTCTCCAAAC  
TC TATTAAGAATCTTTGAAGCGCTGTAGTGAAGTTCCTTTACAATGATGA GAATGTGACTAAAGGCGT  
AACGTCGTTTTGAATTTATGTGCGAGCTTTCTTTTCCATCGTTTATGAAGCCACAACCCTGTTCCAGTTTT  
GCATGTAATCCCTTTTCAAGAAATCGCATGAGCCGATCCATCAACTGTTCTGTAGATTC CCGTATGGAT  
AGCTCTGTATTTGCATG GAATGCTTTACTAGGGACGACCAGATAGTTCCATTAGGTTTTTCGGTAAATAG  
CAACAGCAATAACTGTTTTTTTTGTTTTGTAGGCAAGCAAAGCAGGAGAGGTGGTAGTAAAAGCTTGGGA  
GCCGAAAAGAGGATAGGAATATTC CGAAGAAAGTAATACTTGATCC CCAACAATGCCGACTACCTCTCCT  
CTGTGGAGAGCTCGTAGCGCTTGGTTAATTGCATTC TGTGGAGGAACAATTTTGCCTTGGAAAGATTC TC  
GCAGTGAATGATTTTTGATTGAGCCGACGATTC TTTACAGGTTTGGCAAAGCCAGCCCC GGATAGCG  
TTTAGTAATGTAAAGGAAAGGGAGCTCCAGTTAGCTTGGTGACCACA GAATAAAATGGCTCCTTCTTGT  
CGATCTAAACGTGAAAAGAAATGGTCAAGTTCCTTGTGTGAGGAACTTCTTCTGGAAGAAACCTTCAG  
GAGCATCTTCAGAAAGTAGCAATAGCAATCATTTTCATCGATATGTTTGGC GAATTTATCTACAGTTGCAAG  
CTCTACAAACGTAATGATCATCTGTTGTACGGAT TGGCGTGCAATTTGATAGCGTTTCGGCGAAAACTTTTT  
TCAGGGAAAGCTAAAGCTAAATTAGTAAGAGCTGTTTTTTCGAAATCAGAGATGAAATAGAAGAGAGCGG  
TTCCGAGCCCTTTGCTAAAAAGTCGTAAGGAGGATCGAGGAAGTAATCGTAAGATGGTCAGGACTC CAAG  
ACCTAAACCATAAACGAGATGATCGACGA GAATTTTTCCCCCGTACGTAATCTTTTAAAGAGCATAGTA  
TGTGTTCCGTAAGGCTAGTATGACTTTGCTAGTAGTTACAGAAAAGACTTTGTGATCGAGACAGGCTCT  
ACGTAAAAGCTTCTTTATATAAAACGCTGTTTCAGTTGAAAACGCTCATCATAGCATCAGGAAGATTTT  
TTCTTTAGAGAGGATGACGCTACTTGAATAATCACTTTATTTCTGACGTACGCGCCGTTAAGGCTAAAG  
GTTTCGCCATTTTGTATCAATA GAGTAAGTTTTCGTAAGTATTC TCTAAAGCGATGTC GAATACCTGCTTC  
GTCAAGGATCATATGTTTATTCGTCTTTTGTCTTGAGCCATAACTGCCTGAACAAAAGTATTC TCTAAA  
GTTTTCTCGTCTAGAAATTC TACAGCCCAATGAATGAAGTGTCTCGCTGAGATTTTACAGGAGGCTCCA

TAATAATAGTGAGCGCTATATTATTTTTTACAACATCTAGGAACAGATGGCTGACATCTTTTACATAAAG  
CGGTAGGTCCATTTGGTAGATCCCATGATTGAGTACTAGAGGAGCATTCCTCTTCAAGATAGTAGTTTTGT  
GGGTTCACAAGTTGACTATTTTCTACAGGGAAAAATAGAAGGACCGGAAGATTAATATTAAGAGGAATAA  
ATTC TTGTTTTAAGAAAAGAAGTCGAAAAAATCTGCTTGC GGATCATTC AATTC CATGTAGCTATTGTC  
GAAAGGTATATAAACTTTTTTCCAGTCTTCAGGGACAAGGTATACTACTTCATCAAGATTCCTTGAGCT  
AGACGATTGCGGTCCAGTTCTTCAAAGAACTTTATTAAGGTTAAAAGTTAATTCCAAACCATGATCTT  
TTAAAGAAGAAACGTATTCCTTAGGACCACTTACCTTTTGTACTAAATACTTAGGCCAGGTGTCTAGGTA  
TTCATATCCCTTAGGAGCTCTGCCTATGGGTTAGTGATAGTGACAGAAACATCTTCGGTAACAAATGG  
GT TAGACGAATGAAAATGTCTTCCGATGTGACGCTTTTAATATTTTTTACGTAATGGATGTCTGTGTCCA  
AGCATACTAAGTTGTAA GGATCGATGGTTTTCTATCCAACTTTCAGTTCGTCCTTTGGCACTGATCACTAT  
CTCTAGATTGGAAGGGCGAAGCTTCTCAACAACAGATTTATTCCTGTAAATCATCATGGCAACTTTTTTC  
TTTAGCAGACCATTTGCCTGCAATCCGATTACAGTCTGTTCCGGAGCTAGATCAATAACGCGTACAGGAA  
TATTATGAAAAGTTCTCGTTATCGTAATGGACTGATTTGCAAGCGCCAGATAATAATGGCAAAACCTAA  
AGAAACGAGTTTTTTGGAGCCAATTACGAGAAATCC AAGAGACGAAATTGATCATTTTTTTACGCATCCAGG  
AGATAATAGGGTTGTTTTTTCGTTCAATGCGCGTTAGGATACTTCGCA GGATGGCTTTAAATCTATCCAT  
CTTTACTCCACGAGTTAAAATTC CATCACGAGCTAAGGAACTGCACCGGTCTCTCTGATACTACAATC  
ACGAGAGCATCGGTACGCTGACTAGCACC GAGTGCTGCACGATGACGCGTTCCCATGGATCGCGACAGTT  
GTGTGGTATCATGAGCAAGAGGAA GAATACTCTAGCGTAAGAGATAGTCTCGCCTCTCATTAACACGGC  
TCCATCATGTAGATGGGAGGAGGGCTCAAAAATAGCTTCGAGAAGTTCTTCTGAAAAATCTGCATTAATT  
TTCACAGCAGAGAGATTAAGCAGATCATTC AAAAGACGCTCATTTTTCTAATACAATGAGAGCTCCGATTT  
GTCGTTACGCCATGCGATAGATGCATGCTGTCAAATGGTCAAT GAATTCGTCTTGCATATTGATGACAAA  
TTTTCCCTCTACGCAAGCGTATCC TAGAGAGAGCAAGGC GAATTTCTGGTTGGAAGATAATAAATACCAG  
ATAGCCGCAATATTC ACTACATGAAGCATCAAATTGC GAATAACGGGGAGATGAAGTTTTTTCTGCTAGAA  
CAAATAGGCAAAAGAAAAGACAACAAGCCAAAGACGAGGTCCATGGCGCTGTTCCCGAGAAAAACTTTAG  
CAAATAATTAAGGACC ACCCAAATTAAGCTATCTCCAACAGAGGTGTGGTGTAAATACGTTATACCTACG  
AACATCTATATAAGATA ACCCTAGCAGTTGAAGTGTTTTTATTATTTTCAGCAAAACAAGAAGCTGTACC  
AACTCCTTGAACTTATTACGGATGAACCGAAGTCAAGGAAGGTCTTAAGAAGCCCTTTGGGAAAGGACT  
CATCCCTAGTTTAGCTGGAAGACAGTTAATGGCAAAGTATTTTGTGAAAAGGGCTGTTTTAACAACCTGG  
TGACAGGGAAACGTGCATAGTATATACTAAAAA GAATACTAGAAGTTTTTTGATTTGGAGAGCCAAATA  
TGAGTGCTGAGATATTGGCGAGAGTACAGTTTGCCTTGTTTATC GGATTTTCATTATCTGTTTGTCCCAT  
TAGTTTGGGATTAAGTATAATGATTGTTCTTATGGAGGGGCTCTACTTATTCACAAAAAAGTATTTAT  
AAGCAGTTGACCTGTTTTTGGATTAAGATTTTACCTTAACTTTTGTGTTGGCGTTGTCCACAGGATGGA  
TGCAGATTTTTTCTTCGGAGCAAATGGTCTCGATTCGCAGAATATACTGGAAACGTATTTGGAATGTT  
CCTTGGTAGCGAGG GAATGTTTTGCTTTCTTTCTTA GAATCTGGATTTCTAGGAGT TTTGTTATTTGGTCCG  
TATAAAGTATCAAAAAAATGCACTTTTTTTTCAGCCTGTATGGTTGCGCTCGGCGCTCACATGAGTGCTT  
TTTTGGATTTGTTTGTGCGA ACTCTTGGATGCAAACGCCTTCCGGTTATGAAATGGTCATGCGTAATGGTAT  
GTTAGTTCCCAAATGACTTCTTTTTGGGCAGCGGTGTTGTCTCTTCTGCTTTGCAGCGTTTTACACAT  
GTTGTTCTTGGCGCTTGGTTATCTGGATATTTCTTGTCTTTCTGTTAGTGCTCACTATCTACGTAAG  
AGCGGCATAAAGATTTTGC GAATCAGGGGT TAAAAATCAGCATGTTTTGTGCTTTTCTTGTTTTGGCTTT  
GCAGCTTTGGTCAGCAGATGTCAGTCAAGAGGGGTCGTA AACACCAACCTGCCAAGCTTGCTGCGTTT  
GAAGGTGTTTTTAAGACTCAAGAACAC ACCCAAATTTATTTACTCGGCATTGTAGATATGAAAAAGAGC  
GAGTCATTGGGATCCCATTCCTTCTGGTTTTATCGCTTCTTGTTCACCGAAATGCAAAA ACTCCTGTTAC  
AGGACTGGATCAGTCCCTAAAGAC GAATGGCCAAATGTCGCTTTCGTTTTTCAAACGTATCACTTAATG  
GTCATGTTATGGG GAGTAAATGGTACTTTTAGCTCTGATAGCCTTTGCTGTGTATAAGAAAAAATCTTGA  
GCTGCAAGAAGG GGATCTTATGGATACTTTCCCTCTCTGTGCTATTTCCCTGAGTTATGTAATGAAATCGG  
CTGGATTTCTACAGAGGTAGGGCGTCAACCTTGGGTTGTTTATGGCTTATTA AAAACTAAAGATGCGACC  
TCTCCTATCGTGAACGCAGGGCAAATTTGGCAGTCTTTGATTC TGTTTTCGATTATTTTTATTTGTTTAT  
TAAGTGTCTTTGTCTCGCTTCTTTTGA AAAAGATAGGTGAGGGACCAGATGAGCAAGACCTTATAGAAGT  
AGATTTGTGAGGGCTTCTTTATG GAGTTTTCTTTAGCAACGATTCCTCCTGTTGTTGGTATGTTATTC  
TTTTGCATCGCTGTATTTGCTTATTC TTTAGGAGACGGATTTGATTTAGGATTGAGCAGCATATTTTTCT  
TTCTAAAGATGAGAAAAGACGTAGGCTACTCTTAAACTCAATAGGCCCGTATGGGATGGCAATGAAGTA  
TGGTTTTGTCATCATGTTTGTGGAT TGTTTGCA GGGT TCCCGACCGCTTATGGAACCTTGCTTTCCATCT  
TTTTACATGCCTATTTGGACTATGGTCATGCTATA CATATTC CGAGGCTGTTCTCTAGAGTTTCGTAGTAA

AGCA GAGT CTAACCGATGGAAGCTGTTCTGGGAT GTTCTCTTTCTATCTCAG GGAT GTCTATTAGCTTT  
TTCTGGGGACATTAGCTGGGAAT TTATTAGTT GGAT TTCCGATCGCTCCAGATACTTCGTATAGTTCTT  
TATCTTGAAACTATTTTTCCGCCCTTATCAAGTATTATGT GGGT TATTTGTAGTTGCTGCATTTGCTCT  
ACATG GGAT TAGTTTTGCTTTAATGAAACTACAGAAGGGCTGCACGAACGTTGAAAAATAAATTTCT  
TATGTTCTGTCTAGTTACTTGGTTTTGTATCTTTCCTTGCTCATTGCGACTATTTAG GGAT GCCTCAGA  
CCC TAG GAGT GTGCTGTCGTATTGAAGGCGCTCCTGGTATGCCAGCGT ATCCACTC ATCATCTTATTATC  
GGTAGTAACGTTGCTTGCTGTTATGCAGAAAAGAGAGCGGTCTCTATTGGTAAAACGGGAAAAGCTTTT  
GTTCTCTCTTGTATCAACTTGTGTCCTCAATACTTGCGTATAACATATTGCTCTCCCTAATTTATTAG  
TATCTACGGT GGAT AATCGTTATACTATGACCGTGTTAACGCAGCCGCGGAAACGCGAACCTTACAACA  
CCTAGTCACTATTGTTTTAATTGGGCTCCCGTTTGTCTTGTACGCGATATACATATACC GGGT GTTC  
AGAGGCAAACAGATTTCCCTTCGATTTACTAATTGCAGTA GGGT ACAAGGCTCTTGAAAAGGAGCCTTG  
TATCTTGTGCAAAACAAAGAGATGG GGAT AGCGAAAAATCACAATTTTTCTTTGAGAAAGTTAAA GAAT A  
GTTGCAGCAGCTGCAGCTAGTTCGGAACGTTCCGTTT GGGT CATAAACATATGTCCATACAAAGGTAAT  
GGTGAAACTTTCTACTAGGTAGGTGAGACCATTG GAAT TTTTCATCAAATATAGACTATCTATTT GGGT  
AGGAT CGCCGGTTAACACAATTTTTGTTCTTTTCCGGCTCGAGAGATGATTGTTTTGATTTTCATG GGGT  
GTGAGGTTTTGCGCCTCGTCGATGATCATAAATACTTTAGGTAGAGAGCGTCTCC GGAT GTAAGTAAGCG  
CTTCCATTTCCGAGT TTTTTTGTTCATTAATACTATGCAAAGTTTCTGAAAAGTCGCCCATATT ATTCAC  
ATC GAAT AAAAATTC CATGTTGTCATAGATCGGTTGC ATCC AATGCATGAGCTTCGTTCTTTTATACCA  
GGAAGAAATCC AATGTCCTTCCCATAG GAAT AAT GGGT CTGCTAACTAAGAGT TTGTTATATTTAGGTT  
TCTCAAACACTTGGTACATTGCTGCCGCTAAGGCCAGTATTGCTTTCC GGATCC AGCTTGTCCCATCAA  
GGTCACAAGTTAATATCGTCTCTTAGTAGTAGATCTAGAGCGCATCGTTGTTCTATGTTCAAAGC TTG  
AC ACCC CAAATTTTTTCTGGAGCAGGCTTGAG GGAT AGGAT TTTGTTATCTTTAGAGCTATAGCGACCA  
CAGCG GAAT AGTTATCA GAGT CGCCAGAAAGAAAAAGT ATTC GTTAGGAGAAGTAAAGGAGATAGATC  
TGAAGGGAAGGCGATAGAGCC ATCC TTATAGAAAT ATTC AATTGTGCT ATTC GCTACCTTTAGTTTCTA  
TGTCACGGTAAAG GGAT CGGAAAGATACGCATTTATTTTCATAGTCTTTAGCTTCG ATCC CTAGTGCTT  
CCGCATGG ACTC GTCTGCCAAGACTTTTTGGTTACGAAAACAACAGGCTCTCGTTGAGAAATGATTTG GAG  
TAGCTCTAGCGTGAGGTGTTTTTTCTGTTTCTCGTGGTTTTGAAAGATTGACTAGAGGAGAGACTTCAATA  
CATAACTC GCTGCCGTTTTTTTTAATAAAAATTTGACCAGAGGAGGGT CTTTCCGACTGCTCTAGTAATAGAC  
GAAT ATTGCTCAATGCTCTGGAAGCATTTTTTCCCTG ATTC ATCTCGAACTTTGCGCAGGATTC CAATTC  
TTCGATTACTGTAAGG GGAT AATGATGC GAGT GTTAGAAAAAGAGGAAAGGGCCTTAGGAT CGTAAATC  
AAAACGCTGGTATCAATAACAGAGGTTTTTTTTTACAAATTC CTAATG ACTC AAGTGTAAAGGGGAG  
ATAGTACTTTGATTGTGTATCAT ATCC AGAAAAATTA AACATGTCTTTGTTAGAGAGAAGTCGGGAGAG  
AGGGT TTTTAGCAATCAACCTCCGCGTGTGCTAATCTGTTTGTCAAAAATGT ACCC CTTAACTACAATGC  
CGAGGAAAGC GAGT CTTCTGTTGGAGGTTGTTATGAAAGTCAAAATTAATGATCAGTTTCAATTTGTATTT  
CCCCATACATTTCTGCTCGATG GAAT CAGATAGCTTTTCATAGAGT CTTGTGATGGAGGGACGGAAGGGA  
TATTACTTTGAA ACTC CATTAAATGATGGAGAGACAGTCTCTATACCTAATCTAGGACAAGCGATTGTT  
GATGAGGTGTTCCAAGAGCACTTGCTATATTTA GAGT CCACAGCGCCTCAGAAAAACAAGGAAGAGGAAA  
AAATTAGCTCTTTGTTAGGAGCT ATTC AACAAATGGCTAAA GGAT GCGAAGTACAGTTTTTTCTCAAAA  
GGGCTTGGTTTTCTATGTTACTAGGAGGAGCTGGTTCGATTAATATGTTGTTGCAAC ATTC TCCAGAACAT  
AAGGAT CATCC TGATCTTCTACC GATTACTGGAGAGGAT AGCGCAAATGATGCGTTTCAATATCTATAG  
GACCAACTTCTATTTAGCTAAGCCAGAGCCTCATTGCAACTGTTTGCATTGTCAAATGGACGAGCTAC  
AGTGGAAGAAGA GGAT GCCGGAGT ATCGGAT GA GGAT CTCACTTTTCGTTT CATG GGAT ATCTCTCAAAGT  
GGAGAAAAGATGTACACTGTTACAG ATCC TCT GAATCC AGAAGAGCAGTTAATGTGTATTTAGGAACGC  
CGATT GGAT GCACATGTGGGCAGCCATACTGTGAACACGTGAAAGCTGTTCTTTATACTTAA GAAT AGTC  
CAAAGAAGACTGGCGTTTT CAGAGT AAAAGATCGAACAGTCGCGGTTGACTTTTTCTTTAAGTCAATAA  
TAATTC CCTCTCTAGAGGATGAGT CTTCTAGAGCTGT GAAT GCCTCATTGGAGGCTCAGATTTTAGC GAA  
TTGCAG GAGT TTTTGGCTGCGAACGTTGTCTATTTCTATGCTCATTTTTGCCCCTTTCTTGTGGGGCAGAT  
GCCTGCTTATGTGCTGC GGAT CTTTCCAAGCAAAAAGTTGAGGCTTCTGTGCGTGATAGAGCGGCTTTCT  
CTCCGTTTACAGGAGAGATCAAAGGAAATCGTGTGCGTTTACGTTTGGCTCCGCATAC GGAT AGTTTTAT  
CATTAAG GAGT TATCTAAAGGTGACTGTCTAGCTGTTCTAGGAGAGAGCAAAGACTACTACGTAGTAGCT  
GCTCCTGAAGGAGT TCGTGGTTATGTATTTGCAACTTTTTGTTCTCGATAATGTGATTGAAGGGGAGAAGG  
TTAATGTTCCGTTAGAGCCTTCGACTTCTGCTCCTATCTTAGCAAGATTGTCTAAAGGAACTGTTGTAAA  
GACTTTGGGCGCAGCTCA GGGT AAGT GGAT AGAAAATGCTCTTCCAAGCAATGTGTTTTTTATGTTGCG



AAGAATTTTGTGAA GAATGTTGGGGCTTTGGACCTATACAATCAAAAAGAAGGGCAAAAAAATTAGCTT  
TAGATCTATTGAGT TCCGCTAT GGATTTTGCAGATGCT GAGTTGCAGAAAAAGATAGA GGATATTGATTT  
AGACGCCATTTATAAGAAAAT GAATCTTGCAGCTCGAAGAAT TTAAGGATGTTCCAGGTTTACAATCG  
TTGGTACAAAAGCCTTAGAGAGGGT TCAAGAAGCTTTCCTAGCAAA ATCC TTGGAGAA GAGT GCTGTGA  
AAGTCCCAGAG ATCC AGCATAAAGTTTTGGAAGAGATCGCTGTAGTTTCTCCAGCTGTTGAGGAAA ACCC  
AGTTGTGACAAAAATAGAAGAACAAAAGGTTACAACGGTTCCTGTTCTGCTCCAGCTGTTGTTACAGAG  
CTGGCTCAAGATTTAAGCTCTGTCAAAGGTTCTTTATTATCGCATTAT ATCCGTAAAAAAGGTTTCGTTA  
AGGCTCTCCTGTTATAGAAGGAAGAGA GAGT TTTGAGCGTTCCTTTATTTGCTGTTT GGGT AAGTCTTCA  
GCCCCAAGAG ATTC GGCATCAGCTCACTATG GAATCTTTTTATAGAGATGAACAGAAGAAGAAAC GAGTG  
CTGACCGGAGA ACTC GAAGTGT ATCC TCACATCGTTAAAAATA ATCC TGGCGATTATCTCTTGA AAAATG  
GTGAAGACGTAGTGGCCTTTGTCTATGCTACTAGTATCGATTT GAGT AAATGGTTAGGAAAACCTGTAGT  
TTTA GAGT GTGTCTCTAGACCAATAATCATT TTTGCTTTTCCCGCTATATTGTTTGTGTCAGTAAAAGAA  
GGGGCATAAGCAAGTTCAATAG GAGT CTTGTTACTTAGGTAACAAG ACTC TTCTTCTTTTTTCTTTTTTG  
CTAAGAGCTACGG GGGT TTTCTGATAATGTCTCTTCCG GGATTC CTGATTGAGGA GAGTCTGGCAATT GA  
ATAGAGGC ATCC TGTTCTGGAAGTAGAGAGGGCGAAAAAGTTCTATGGAAAAAGCTTTAACAGCCCGGA  
AGATTTTTTGAAT AAG GGATCC AAGGCAAAC TAAAGCTTTG ATTC CAAAGACTTCTTGCATCGCTTTTGT  
GTGCAC TTGTGGCC ATTC TTTTCTAATGATAGAGCAGGGGAAC TTATTGCAAG GAAT GTTC GGGT CATT  
TGACAGAG GAATCC TCCTGTTTCGTCTACAAAAGCTTGATGTAATTTGCGCATGTTATAACAAGTGC GAA  
TCC CTACAAC TGTGCTCA GAAT GGGCACATAGCTGCAAAAAGATGTCAGCGCATTACGACGAAGATAGTT  
GTGTTGTAAGCA ATCC CATGCCGGGAAGCT ATCC GCATTATGGGCATGCTGCATGAAAAAAAAGGTATTA  
GAAAAACGTACACGAA GAATACTC CTTAAAAAGATAAAGCTTCTAGCTTTTGAAGCGGGGAGAAGTAC  
AGAGGCAAAAAATGCGGACGTAAGGAAAAATCACTGAAAGCCAGAGAGAC ATTC TAACAGAAT CGGGGA  
AAAAATTTCAATAAAAAACGGCCTCTCCTTCTGTATGCCTCTTGGGGA ACTC GGTG ACTC GTTATTTGGG  
AGGACACGAAA ATCC AAG ATTC CCCACTAGGCAAAAACAGAAGAAGAAACCTATGGAGGTGGAGA GAGTC  
GA ACTC TCGTCCTTAGTAA ACTC CCCGCTAACCTCTACATGCTTAGTTCCCTAGGTACTATACGTTATGTC  
TCCTCAGCTAGAAA ACCC CTATAGAGACTAACG ACTC TCATTAAATTTCAA ACTC ATTTCTCGA GAATTA  
AAGG ACCC AAGTTCTAACCAGATACATGACGGTGT TTCGAAAACCTCTGGTGGAGCTCGCGAAC ACCGGG  
TC ACCC GTATTTAGTAA CAAC TTTGCTAATTAAGCAGCT ACTC TTAGATCTTCGAGATCAGCGAAGCTG  
ATAATTTTCG ATTC AGCCTTAGGTTCCGGCATT TATTGTTTTGTGCGCTTTTTTGGGAGGCCAGCCAACGCC  
CTCCGCATGCAATTAACGCTTCATTTCTAAGTCGAAACCTTTAC ACCC CCAGAGCTGA GGATTGTAAGGA  
TTCT GAGT CTTTTCCGCAATATTTTGTGAGAAATCAATGTAAC TGTTCATTAAAAGC GGAT TGTGTC  
GAGGCAGAGGGAAATGAAAGAGAGG GGATTC AGGCGATTATATG GGGT TGGCCTAG GAGTAAAA GAGTGG  
TTCTCCATTTATTGTGCTCTCTTCCGCTCGCTCGATAAGCATA TTTAATTAACGGTTTAAAAGGC GAA  
TCGATCATA ATCC GTTAGTTAAGAAAACCTGTTTAGGAAAGCAGTTAAACTGCAACTTTGTAAGCAGA  
TCGATCAAAC TTTGAAAGCATCAA ACCCATAAGT GAATAATCAA GAATGGAT AACGAAGATAAGATT  
AGTATTTCCGCCAAAGAGGAAAAG ATTC TATCTTTTGGAAAGAGCAAGATATTTTCAAAAAAC TTTAG  
ACAATCGAGAGGGCTGCCCACTTTTCTTTTTATGACGGCCCTCCATTTGCTACAGGCTTACCGCATT  
TGGCCACCTGTTAGCAGGTACAATAAAGATGTTGTATGTCGTTATGCGTCGAT GGAT GGGCATTATGTG  
CCTCGGCTTTTTGGCTG GGAT TGTCTATG GGGT GCCAGTC GAATACGAAGTAGAGAAATCTTTAGGTCTTA  
CCGAGCCAGGAGCTATTGAGCGTTTCGGTGTGGC GAAT TTTAACGAA GAATGTCGCAAGATTGTTTCCG  
ATACGC GGATGAAT GGAATATTTTGT GGATAGGAT CGGCCGAT GGGT AGATTTTCTGCAACATGGAGG  
ACTATGGACCTATCTTTCATGGA GAGTGTCTGGT GGGTATTC CGCTCTCTCTATGATCAAGGACTTGTGT  
ATGAGGGGACCAAAGTGGTTCCTTTTTCTACCAAGCTAGGT ACCC CCCT ATCC AATTTGCAAGCTGGCCA  
AAATTATAAGGAAGTAGACG ACCC TTCTGTGCTGTGAAAATTTGCTTTGCAAGACAATCAAGGCTTTCTT  
CTAGCATGGACCACA ACTC CTTGG ACTC TTGTTTCAAATATGGCGCTAGCTGTGC ATCC TGAGCTCACCT  
ATGTCCGTATTAAGACAAA GAAT CAGGAGAC GAAT AT ATCC TGGGACAGGAAAAGTTTGCCTCGTTGGTT  
CCCAGATCGAGAAT CTTAT GAATGGAT AGGACAATGTCTGGAAA GAGTCTTGTGTTGGACAAAGTTACGAA  
CCGCTTTTCCCTTATTTCCAAGATAAAAAG GAGT TAGGGGCTTTTCGT ATTC TTCTGCGAGATTTTATTG  
AGGAAAAGTGAGGGGAC GGGTATTGTTTCAATATGGCACCAGCTTTTGGAGAAGCTGACTTTTTTGTGTTGCCA  
GGAACATAACGTACCTCTAGTGTGCCCTGTTGATAATCAG GGGT GTTATACCGCTGAGGTGAA GGAT TTT  
GTCGGC GAAT ATATTAAGTCTGCTGACAAAGGCATCGCTCGTCGATTGAAGAACGAAAATAAACTGTTCT  
ATCAAGGTACAGTTTCGTCACCGCT ATCC GTTTTGTTGGAGA ACTG ACTCTCCTTTAATTTACAAAGCAGT  
GAATTC TTGGTTTCGTTGCTGTAGAAAAGGTAAA GAGT AAGATGTTAAAAGCCAAT GAATCCATTC ATTGG

ACTCCTGGGCATATCAAACAAGGACGCTTTGGTAAGTGGTTAGAGGGAGCTCGTGACTGGGCTATCAGTA  
GAAATCGTTATTGGGGGACTCCTATACCTATTTGGCGTAGTGACGATGGAGAGCTTTTGGTCATAGGATC  
TATCCAGGAACTGGAGGCATTATCTGGACAGAAGATTGTAGATTTGCATCGCCACTTTATTGATGAGATA  
GAAATTAACCAGAACGGGAAATCTTCCGAAGAATCCCTTATGTTTTCGATTGTTGGTTTTGATTCGGAG  
CTATGCCATATGCTCAGAATCATTACCCTTTTGAAAGAGCAGAAGAAACGGAGGCTTGCTTCCAGCTGA  
CTTTATTGCTGAAGGACTAGATCAGACTCGAGGTTGGTTCTATACGTTAACCGTTATTGCTGCAGCTTTA  
TTCGATCAGCCCGCTTTTAAAAATGTAATTGTAATGGGATTAATTCCTTGCGGAAAGACGGAAATAAAATGT  
CGAAGCGGTTGAATAATTATCCTAGTCCAAAAATGATTATGGACGCGTATGGAGCAGATGCTTTGCGGCT  
GTATTTGTTGAATAGCGTGGTCTGTTAAAGCTGAAGATCTTCGCTTTTCCGATAAAGGGGTAGAGTCTGTG  
CTTAAGCAAGTTCTATTGCCGTTGCTAATGCTTTGGCTTTCTATAAGACTTATGCGGAATGTATGGTT  
TTGATCCATAAGAAAACAGACAATATAGAAGTTGCTGAAATAGACCGCTGGATTCCTTCTTCTCTATACAG  
TTTGTAGGGAAAACTCGAGAAAGTATGTCGCAATATGATTTACATGCTGCTGTAAATCCTTTTGTGGAT  
TTCATTGAAGATTTAACTAACTGGTATATTCGTAGGTCGCGGCGACGTTTTTGGATGCCGAGGATTCCTA  
CAGATCGACGGGCAGCATTCCTACACTTTATGAAGTGTGGTAGTCTTTTCTAAAGTCATTGCGCCATT  
CATTCCTTTTATTTCAGAAGATATGTACCAGCAATTACGAGGAGAAAACGGATCCGAGTCTGTGCACCTTA  
TGTGATTTTCCCTCACGTTGTCTTAGAAAAGATTCCTCCTAATTTGGAAAGGAAAAATGCAGGATATTCGAG  
AGATTGTAGCTCTAGGGCATTCCTTGCCTAAGGAGCATAAACTGAAAGTACGTCAACCTCTTCAAAAACGT  
GTATATTGTAGGAAGCCAGGAGAGAATGGAGGCTTTAGCTCAAGTTGGATCCCTTGATTGGAGAAGAGCTT  
AATGTGAAAGACGTACATTTTTGTTTCAGAACTCGGAGTATGTAACCACTTTGATTAAGCCTAATTTCC  
GAACCTTAGGGAAGAAGGTAGGTAATCGTCTTCCAGAAATTCAAAGAGCTCTAGCAGGATGCGCTCAAGA  
GCAAATTCAGGCTTTTATGCACAAAAGGGCAGATGGTTGTTTCTCTAGGAGAAGAGACCATTTCTTTAGAT  
AAAGAGGACATTACAGTTTCTTGGGCATCGGCTGAAAGGATTTGTAGCGAGAAGCTCAGCTTCTTTTGTAG  
CAGTACTGGATGTCAGTTAACAGAGCCTTTAATTATGGAAGGTATAGCCAGAGAGTGGTTAATAAGAT  
CAACACTATGCGAAGAAATGGGAAATTACACGTTTCTGATCGCATTGCTATACGTTTACATGCCCTGTT  
ATCGTTCAGGAAGCGTTTCGCTTTACACAAAAGAGTATATTTGTGAAGAGACATTAACCACTTCCGTTTCTG  
TGATCGATTATAAAGAAGGGGAAAGAGTGGATATTAACGGTCACGCAGTGTCTTTCGTTCTGGAGCGAGT  
TGAGCGTTGAGATCACTATCATTGAGCAAAAAAAGAGGCTTATTAAAAGATCTCTTTTTTTTTGCTCTTA  
AGGGAATAGCCTATGGTTTTTTTCGATAGTACCATAATCCCTATGCAGTAAAGAAAAGCTCCTAGAGCCAAT  
CCATTTACGAGGTAGCCAGGTAAACTCAAGGGCGTTATATTGGAAGATAACAATCCTAGACGATTAATAG  
GCCAGAAGATCCCAACAGGAGATCCAAAAGATTTTCAACGGGAACAAAACCAAAATCACGGCTATCAGC  
GCTCATAGGACAATTATCTCCTAAGACAAGCACGTGGCCTTCCGGAATTTTAAAGACCGAAATTAGTAATA  
AAGGAAACAAATTCCTCTGTAGATTCGAGGAGGACCTCTGTCAATAAATGCGATGTAAGGTTTGTCTT  
CAGATGATTGAAGTCTTTTTCTTTCAGACACAATGAATTTCTGTAAAGGCAAGGATCGCTATCAATAAA  
AACTGGAATCCATAACGAACAGGTTCCCTTGATTGAAAAATGCATAGCGATTAGGGAACGGAGCATAT  
TGAAGGTTTTTAGGAATATAGATCGTGTGAAACTAATGCCGCAATTAATAAGTCAATGACCTGAGAAT  
TGCTTAATTGCGTTAAAGGATGCGGCTGTTTTGAGTTTTGTTTCGAAAGCCACCCATATTGATTTTAAACAC  
GTCTCTTTAGAAAATTCATAACATCCGTCAGGAATATTTGGCATAGGTAGGGCAAACATCCTGACCATG  
CCTGAGGTATTCATGGGAGCAGGTTGGTACTTGTAAAGCATATCCATCTACAACGTAAAACGGGATGTTG  
TGAGGTTATTACGAATCAAATGAATATGTTCTTCTTAAAGGAAGCAAGGTTTTCATAGGTTTCGATAGT  
AGGAATAAGCTGTGTTCAAATGGACGTAAGTGAAGGTGAGGATAGGAAACATTAGGAGTGTGGCAATT  
TCTAGGTAGGTGTCCGAAAGAGGAGAGGGAAGGACATGAGTAAGAGCAGCTTGTTTTTTGGTAAAGGATGC  
GAACCATTGCAAAATTTTTTATTCGAATAGATCGGCATAGCTAACAGGCTCATTATGAGGATCTTTTAA  
AGCATAGGAGTATCATTATGCCAAGCATTCCTTATAGAAAAATGTCCATAAGAAGCCTGTTGAGGGAGA  
GAAATCTTTCCACAAGGTGTGTGAAATTGGTTAAAGATCACATCTGTTTGTCTTCTGAATGGGTAAAGAA  
TTTTCTGAGTTCCGTCAAAAGAAATATAGGGGACGTGGTAGAGATTCCTCTGTATTTTGGGGGAAGATGGG  
CTCTCCGTCGCAATCGATCCATAAATTTCCCTCCATAAAAAATATACGGTATCTCCAGGTTTACCCATG  
CACCGTTTTATATAGCGTTTTTTCCAGGATGATTCAAAATACTTAGTGTGCGCATTAGGATAGGAA  
GATCTCCAACAGTGAAGACTACCAGTCTCCTCGAGTGATAGCCTCAGGTGTATAGCCAATACTTCTGTT  
ACTAAAAGGTAGCCGAGTCCAAATGTTGTTTTGGAAACAAAGAAACGATCTTGTTCAGAAATAGTAGGC  
CGCATAGATCCGTGAGGAACTTCATATAGCTCAAACCCAGAACTGGCGGATTAAAAAAGCAAGAAATGGCAG  
CAAACGTCAAAGCATAGATAAGATCAAAGTAGCTCGGAGTTGGATTTAGGGAATCTTTTTTGTATGGC  
TTGAGCTTGCTTAGCAAAAAGGGAAGCATCTTCCCTATTCCTGATCCAAAATAGCCTCTTCAAGCTGTTTC  
AAGACTTCTGTAGTTCTTTTTGAGTTTCCGGATGAGAGAGCATTTTTGTGCTTTTCCAGCAATCTAAGG

AAGAATGAAGAATGCGACGACTCTTATTTCAGGGAATATAAGCGACTCATGTAACTGCTCGTCATTAGATT  
TAACAGTATTTATGTTAGGAGAGACCTCTCTTCACTACTTTCTATTGTGAAAAAATTTAGATTTTTTTAG  
GGCAGGATCTACTTAATTCATATGGAGGTCTTTAAGCCAAGGTCATCTTACATAAAAAGCTTTTTTCGGC  
ACTACATTGAAACCGTTTTTCGATGAAAGTATGAAGATGGCTAGAAATTGGGAAGAGCTGGATAGGATGAG  
GCGGCTTGGTGCCCCATTTCAATGGTCTTAATAATCACTGTCCCTGTAGGAGTCTCAATACTAGTCCATA  
GAGGAAACGCTAAACGTTTATTGTTAGAAAAATATATGAATATTTTTTTCTGATAGAGGAGAAATC  
TTTTGGCCAAACAGAAATCCAAGCACTGGAAGGAAAGGTTATGAGTCTCTCCATTCAAAGATGTTTCGCGGA  
GACCAGGGGTTGCGTCTTTCCCTTTGTATTTAATTAAGTGAGAGGGGGCTGGAGATAAAGGGAGTTCGAA  
GGATTTTTACAAAGAAAGGCAAAAGGATCTTTTTCTGAGAGAGGCATCCATTGCGCATTTTTGAGAACAAA  
AATCATAAGAGGATTTTTGGAAATTCGTAACAAGTACACTTTTTTTGAAGATTGGAGTTGATGGAAGGCA  
TTCCTCCAGGAAGACTGTTCTACTAATTTTTTTTCTTGCTGTGTTAGGGAGGCAAAATTCAGACACTTCGA  
CCCAGTCGCTTCTGAAGAACTTTGGCGAATAAAAAGAAAAATTTTTGAGATCCTCGGCTTAAGACGGC  
ATAGTCTCCGGGGCGGGCAGTTAAGATTTTTTCTTGGATTTGATGATTGGAGAGGAATGGGCTTCAGCC  
GAGGGATAGGATATGAAAAATGCCAAGAAAAAATAAAAACTTTAAGAAGGTTTTGAGGGTGCATTTTTT  
CTTGCTTTTTTCATAAAATGTTTGGGTATGCTCTCCCTTCTGTTATGTGAGATTTTCACATACTAAGATAG  
TGATTTTGGGGTTGTCAAATGAAAAAAAACACTCATCTGAGTATAGACAAGTTCGTTTTGTAGATTCCTT  
CCACTGGGTATAAGTTTGTGTTGGGTCTACCTATCAGACAGATAAAAACAGAGGTTTTTTGAAGGACAAGA  
ATACCCGTGATGCTACGTACGATTTCCCTCGTCTTCGCATCCATTCCTCACAGGAAGCAAGAAGCTTGTG  
GATGCTGAGGGTGGAGTTGATAAGTCTTGAACGATACAGTGGCATTAAAGCAGTCTGCTCCTAAGCCTG  
AAACCGTTGTGGAAGATGTTCTTCCCAAGGGTAAGAAGAAATCTCCTGCTAAGAAGAAAAAATAATTTGA  
GCAGAACTTTCTGTTATCTAGAGAAAAGCGGGGCGAACACCCCGCTTTTTTTGTTTTAATAAGTCTCTCT  
TTTTGAATCTGACTTTTTCAGAGTAAAGTCTAGTGTCCCAAAAATTTGATTGCCAATGTACACTCTGGTC  
TTTTGTTAGAGAGATGCTAGAGTAAAGGCAGAAGAAGTCTGTTTATGAAATAAAAAGTTTTAGAGTGTTTAA  
AGCGCTTGAAGAAGTTGAAAAGCAGATATCCGATCCGAATATCTTTAGTAATCCATAAAGAAATATAGTTC  
GCTGAGCAAGGAGCATGCGCGTCTTTCTGAGATTTAAAATGCTCATGAGTCATTGGTTGCGACAAAAGAAA  
ATTCCTCAGGACGATAAACTCGCTTTATCAACAGAGAAGGATCCAGAAATAGTAGCTATGCTAGAAGAAG  
GAGTCTTTGTAGGGGAAGAGGCTGTAGAACGCTATCGAAGCAGTTAGAAAACCTGCTTATTCACCTGA  
TCCAGATGATGATCTCAGTGTGATTATGGAGTTGCGAGCAGGAACGGGAGGAGATGAAGCGGCTCTTTTT  
GTAGGGGACTGTGTGCGCATGTATCACCTTTATGCAGCAAGTAAGGGTGGCAATGCGAAGTTCCTCTCTG  
CATCGGAGTCAGATCTCGGAGGCTACAAAATATGTTATGGGATTTCTGGGGCTTCTGTGAAACGTTT  
CTTGCAAGTATGAAGCAGGAACACATCGTGTGCAAAAGGTTCCAGAAAACAGAGACTCAGGGTAGGGTACAT  
ACGCTGCGGTAACGGTAGCTGTTCTTCCAGAACCAGCAGAAGATGACGAAGAAGTTTTTATTGATGAGA  
AGGATTTACGTATTGATACCTTCCGTTCTTCTGAGCCGGAGGCCAGCACGTCACGTTACAGATTCGCGC  
TGTGCGTATTACTCATATTCCTTCTGGCGTTGTGTTACGTGCCAAGATGAACGCAGTCAGCATAAAAAT  
AAAGCTAAGGCTATGCGCGTGTAAAAGCTCGTATTCGCGATGCAGAAGTGCAGAAGCGCGCGCAAGAAG  
CCTCTGCTATGCGTCTGCTCAGGTAGGAAGCGGAGATCGTTCGGAGCGAATTCGAACCTATAATTTTCC  
TCAAAACCGTGTGACCGATCACCAGATGGCTTAACCTTTATATAACTTAGATCGTGTAAATGGAAGGGGAG  
TTGGATATGATTACGACAGCTCTTGTAAACCCACGTACATCGGCAGCTATTCGGTCATGAAGAAACTGCTT  
AGAGAAGCTTCAAGATATTTGTTGTCTCGAGGGATTCGGTTTTCTCAAAGGGAAGCCGAAGATATCTTGA  
TGGATTTGTTAGAGATTTCTTCTAGAAGCGCTCTCCATCAGGCGAAGTTATCGAGCGAAGAGCAAAGTCT  
TTATTGGAAGCGTCTGCGGAAGCGAGGGGATCGTTGTCTTACGGCATAACATCCACGGTAAAGTGCATTTCT  
TTAGGGTTGAGTTGCAAGTAACCCCTCAAGTCTAATTCCTAGGCAAGAAACAGAAATTTTTGTAGAGC  
AGATCATTGGTTATCTGCAGATGCACAAGGAGAAGACAACATTTTATGATGTTTGCTGTGGGAGCGGGTG  
TATTGGTTTTGGCAGTGAGGAAGCACTGTCCGCATGTACGTGTTACGCTATCAGATATCAGTCTTGAAGCT  
TTGGCCATTGCAGAGTCCAATGCTAGAAGCAATGCGCTTGCAGTAGACTTTCTTTTAGGGATTTGTTTG  
ATCCCTTCTCTTTTCTGCGATGTGCTTGTGTTGTAACCCCTCCTTACCTATCCATAAAGAGTTTTTTGA  
ATCAGATCCTGAGGTACGGTGTGATGAACCTTGAAAGCGTTAGTTGGAGGCGTTCTGGGTAGAATTT  
TATCATCGTATAGCTACTCATATTCATAAAAATTTTAGTCTCTGGAGGCGTTGGCTGGCTAGAGATTTGGCT  
CAACACAAGGAGAGGATGTAAGCAAATTTTTTCATGCCAAGGGAATCCGAGGACGCGTGTGAAAGATTA  
TGCGCAATTGGATAGGTTTTTTTTTCTTGAAGTCAAGCTAATGATGCTGTATCCCTCTGGGGAGGTTTTCT  
GGCTTTTCCGAGAGATGATTAGTTCTTTATCGCAAAAATTTATCTAATTTTTCTCCTCACTTTTTTACCGC  
AAAGAGGGTGACAGAGGAGGGTATTTCCGACTCCATTAGAGAGGTTGCTTAGCTCTTCTAGATGCCGAT  
GTGAATATCAGGCGGTGAAGGATTTTATTGCTAAAGTGAAGCAGAAAGTTGTTGGGGAAGAAGTTTGA

AACATGTCTCTCCTGGGCAACAGTTTATCAAGTGTTCATGAAGAGCTTTCATCTTCTCTTGCTTCAGAGCAGACTGCTGTTTCGTTACGGGGATGCCAGCTGTTATTTTACTCTGC GGGT TACAGGGAGCGGGGAAAACGACTACTTGTGCTAAGCTTGCTGACTATTTTCTTCGAGAAAAGAAGGCAAAGAAAGTGCTGGTAGCCTCCTGTGATTTGAAACGTTTTTTCGGCTGTAGAACAGTTGGAAGGTTAGTAAAACAAACGGGAGCAGATTTTTCGAAGGGAAGGAAATGATCC TGTGGACATGGCGGCGGAGGCGGTT CAGCATGCGAAAAGCCAA GGA TATGATTTAGTCCTTGTGGATACCGCTGGACGGCTTCATGTGGATGATGCGTTGATGGATGAGT TAGTAGCTATTGCTCGTGTAAACGAGCCCCTGCGAAACCTTGTTCGTTATGAACTTAGCGATGGGACAAGATGCGGTGTTACTGCAAAAGCTTTTGGACGAGCGCTTAGGCTTAACAGGTGTGGTGTGTCTATGGCAGACGGTGATGCTCGAGCTGGAGCGGTGTTGTCTGTGAAGTCCTTGCCTAATAAGCCAATTAATTTGAAGGGTGTGGAGAGAAGATAAAAGATCTACGTCCTTTTAAACGCACAGTCGATGGCAGAACGTAATTC TTGGAATGGGAGATACGATCAGTCTAGTGACAAGATGCGAGAGTGTATCTCTGAAGAAGA GAATAAAAGAGT TAGAAGAAAAGTTA ACAAAGCAACGTTCACTTATGAGGATTTTCATAAGCAGATACTTGC TTTTCGTCGTTTAGGGCC TTTGCGTAAGATCATGAATATGATGCCAAGTTTGGTGGTGCAAAACCTAGCGATAAGGATTTGGAA GAATCCGA GAAAACAATGAAAAGAAATGAAGCGATTATTC TGCTATGACTC CAGAGGAACGAAAGGAGT TAGTGAA TTGAGTATGAGCCGGATGAAAAGAATCGCTGCGGGCTGTGGATGACGCTAGGTGATGTCAATCAGTTCCGTAAGCAAATGATGCAATCTAAGAAGTTTTTAAAGGGAATGACCCGAGAGAAAATGGAACAGATGGGTAA AAAAAATGTCTGGAGGGAATCTGTGGCGTTAAAAATTCGTTAAGACAACAAGGACGTAAGAACCATGTTGTATATAGATTAGTACTAGCTGATGTGGAGTCTCCTAGAGATGGTAAATATATTGAGCTGTTGGGATGGTACGATCC TCATAGCGAGCA GAAT TATCAGCTGAAAAGCGAACGGATTTTTTATTGGTT GAAT CAAGGAGCTGAGCTTACAGAGAAGGCTGGGGCTTTAGTGAAAACAAGGAGCTCCTGGGT TTATGCTGAACTAATGGCTA AAAAAAGTTGCTCGTAGAGCAGTCGTTAGACAAAAAGACGAGCTTATCGTCAGCGTCTTGCTGCAAGAA GGCTGAAGCAGCTGCTAAGTAGATAAGGACATAAGGAATGGAGATAGATATTC TCTCTTATTC CCGGACTATTTTGCTAGTCCTTTACAGGCGACTATTTTAGGCCGAGCAATTAACAGGGAGCTTTATCTGTTCCGCTCCCGAGATATTCGAGAGTTCCGGCTTAGGGAAATGGAAGCAGGTAGATGACTC TCCCTATAATGGAGAGGGGATGCTTTTTGATGGCAGACCTGTGGTACAGGCTATTAGAAGCATAAGAAGAAAGAAGTCCAAGTCCATA TACTTATCTCCGCAGGGACAACCTCTTTCCGCAAAGAAAAGTCTGAACTGGCGCTCGTGTTCCGATTTGGTATTGTTATGTGGACACTATGAGGGAAT TGATGAAAGGGCGTTGACTGCCGAAGTGGATGAGGAGATAAGTATTGGTGATTACGTTCTACCAATGGGTGCGCGGCGGCTTTAGTTCCTGATAGATGCTCTTGCTCGCTTCATTC CGGAATTTTAGGGAACCAAGAAAGTGCAGAGTACGACTC TCTTGAAAATGGAT TGTTAGAAGGTCCTCAGTACACTCGTCCACGGGT TTTGAGGGTGAGT CCGTCCCTGAAGTGTGCTTTGTGGAGACCATCA GAAGATTGCGGAT TGAGAGAAAACAGGTTAGTCTAGAGAGAACTAGAGAACGTCGACCAGATCTGTATCTGCAGTATTTTTATGGTAACAGTGCTGTTTTAAGTACTCAAGAGGATCTCCCTAGGATAGAGGTAGTTTCTCCAAAAC TTTTCTGTAGTTTTTAGAAGTTCAAGATCTTCGAAAAGCTAAGAAGTCTATTC CAGGATGTTTGAAAAAGAGTGTGGGACGGAGATAAATATTCCTTTTAGGGAAGACGAGT TTGTACCTGCAACAGACA AAAGAAACAAGAGGCCCGACCACAGTATTTATAGAGCTGGAGACTGATCATGATTTTGTTCGTTTTTTAA AACGATGGGAAATGCTCGGAGGAGAGCTTGGTGAACAAGGGACGGGAGGGT TCCTTAAGACAGGTTTTTGATTTAGATGGCCATATTTGGGTGTCCTTGTGTACAGAAATAGAAAA GAATTTTTAGGTGAAATAC AATGGGGAAC TTAATCAAGGAATGCAAGACGAGCAGTGCAGAACTGATCTCGCTGATTTCTGTGTTGGTGACACGATTCGTGTGGCTACAACATTT CAGAAGGAGGCAAGGAGCGGGTTCAGGTATTC CAAGGAACAGTCATGGCCCCTAAAGGCGGTGGTGCAGGAGAAACAGTTTTCTCTCATAGAGTTGCTTACGGTGAAGGGATGGAGAAGAGCTTTCTACTGAATAGCCCTAAGATCGTAAGTATTGAAGTTGTA AAAACGCGGAAAAGTATCGCGTGACGCCTCTTTTATTTAGAGGAAAAACTGGTAAGGCTGCTAAAGTTAAAGAGCTTATCGGTTCTCGGGCTGCTAAGAAATAGTAAAGAAAAGAGAGCGGCATTAAGCCCTTTCTGCTGTTCTCAACGTCAAGAGATTGCTTTATATGAAATCGACCGTTGAGCAGGCGATGCTTTTCGAAGAAAAAGCATTTTTTGA GAATCAA GCTATTGAGCAA GGGTACTCACAAGTTGCCGGTGTAGACGAGGCTGGGAGAGGGCCCTTTCAGGCCCTGTTGTTGCTGGAGCTTGTATCTTACCTAGAGGGAAAAGTTTTCTTAGGTATTGATGATAGCAAGAAATTAAC TCCTAAACAAGACGGTATCTGTACGAACTGTTGCTTGAAGATCC TGAAGTCGACTGCGGGGT CGGCGTTATTTCTGTTGAGC GAATAGATGAGATCAATATTTTGGAGGCTACCAAGGAGGCTATGGTTCAAGCCATAGCTTCTTTGCGAAGCACTCCGATTTTTTATTGGTTGACGGGTGTTTTTGCCTCATAAAATTCCTTCTCTTAAGATTATAAAAGGGGATGCTCGTCCGATCGATAGCCGAGCTTCTATCATAGCGAAGGAATATCGTGACGAGT TGATGCGGAAGCTTCATGTA GAGTACCCGAGTACGGTTTTGATAAGCATAAGGGGTATGGGACAGCAGCTCATTTACAAGCTCTAAAACATTTCCGGCCCTTGTGTATATCATAGAAAAAGTTTTCTCTCCTGTGAAAAGAGTATTC AAGAGGGAGTATGT CAGTAAAGGTTATTTCCCCCTTTTCTCAAGACGGGTCAAT

GCTTCCCAAGCTTTTTATCATTAGCGCTCCTGCTGGAGCAGGGAAGACAACACTCACC

AAGA GAGT TTCCTGATGCATTTGAGAAGACGGTGTCTCAACGACACGTTCCGGCTCGTCCAGGCGAAGTG

CATGGCGT GGAT TATTTGTTTGTATCTGAAGATGACTTTAAGCAATCTTTAGATAGGGAAGATTTTTTG

AATGGGTCTTTTTATTTGGGACTTATTACGGAAC GAGT AAGGCGGAGATTTCTA GAGT TCTGCAAAA GGG

TAAGCACTGCATAGCCGTGATTGATGTACAAGGAGCTTTGGCTCTGAAGAAGCAAATGCCGGCAGTCACT

ATTTTT ATTC AAGCTCCCTCTCAAGAAGAACTTGAGCGCCGTTT GAAT GCTCG GGATTCAGAGAAAAGATT

TCCAGAAGAAAAGATTAGAGCATAGCGCTGTGAAATTGCTGCCGCTAGC GAAT TTGATTATGTTGT

GGTTAATGATGATTTGATTACAGCATATCAAGTTTTAAGAAGTATTTTTATAGCTGAAGAACATA GGATG

AGT CATGGCTAGAAAAGATCGTTTAACTAATGAAAAGCT GAAT AAGCTATTTGATAGCCCCTTTAGTTTG

GTTAATTACGTAATTAAGCAAGCTAAGAACAAAATTGCTAGAGGAGATGTTCTGTTCTTCTAACGTCGCGA

TTGAGGCGCTGAACTTCCT GGAT CTTTATGGC ATTC AGTCC GAAT ACGCTGAAAAGAGATGATCGAGAGAG

ACATTTGTCTGCTACAGGAGAGAGACGAAGAGAACAAGTTTTCGGAAC ATCC AGAAGAAAAGATCC TTCT

CTGTACAACCTGGAGCGACGTGAAATAGTGAAT CTTCCCGT ATTC TTATTACTTCTGCGTTGCCTTACGC

AAATGGTCCTTTGCATTTTGGACATATTACCGGTGCTTATTTGCCTGCAGATGTTTATGCGCGTTTTTCAG

AGACTACAAGGCAAAGAGTTTTGTATATTTGTGGTTCTGAT GAAT ACG GAAT CGCAATT ACCC TTAATG

CAGAGT TGGCAGGCATG GGGT ATCAA GAAT ATGTGACATGTATCATAAGCTTCATAAAGATACTTCAA

GAAATTGG GAAT TTCTGTAGATTTCTTTTCCAGAACTACGAACGCTTATC ATCC TGC TATTGTGCAAGAT

TTCTATCGAAACTTGCAGGAACGCGGACTGGTAGA GAAT CAGGTGACCGAACAGCTGT ATTC TGAGGAAG

AAGGGAAGTTTTTAGCGGACCGTTATGTTGTAGGTACTTGTCCCAAGTGT GGGT TTGATCGAGCTCGAGG

AGAT GAGT GTCAGCAGTGCGGT GCCGATTACGAAGCTAGAGATCTGAAAGAGCCTCGTTCTAAATTAACG

GGGCAGCTTTATCTTTACGTGATACGGAACATGCTTACTTGCATTTGGAGCGCATGAAAGAAGATTTGC

TTGCTTTCGTGCAAGGTATTTATCTACGTCTCATATGCGTAATTTGTTAC GGAT TACATCGAGCATT

ACGTCCTCGAGCAGTG ACTC GAGATTTGTCTTGG GAATACCC GTTCTGATTTGAAAATAAGGT ATTC

TATGTGTGGTTCGATGCTCCAATTGTTACATAAGTGGAACTAT GGAT TGGGCAGCATCGATTGGAGACC

CTGAAGCTTGGAGAAGTTTTGGTTGGACGATACTGTGACCTACGCACAGTTTATAGGTAAAGATAATAC

TTCTTTCCATGCGGTTATTTTCCCTGCTATGAAAATAGGACAATCTCTTCCCTATAAGAAAGT GGAT GCT

CTTGTAACATCAG AAT TTTTATTGTTAGAAGTTTTCCAGTTCAGTAAATCGGAT GG GAAT TTTATAGACA

TGGATGCGTTTTTTAGAAACGT ATTC CTT GGAT AACTGCGTTATGTGTTGGCAGCGATTGCTCCAGAGAC

TTCCGATAGCGAATTC TCTTTCCAA GAGT TCAAGACGCGATGCAATTC TGAGCTTGTAGGGAAGTATGGA

AATTTTGT GAAT CGAGT TCTAGCTTTTGTGTTAA GAATGGAT GCACAGAGCTTTCTTCTCCTCAATTAG

AGCAAAA GGAT TTGGAT TTTATCTCAAATCTCAAAAACCTTGCTAA GGAT GCAGCCGAACATTACGCACA

ATACAGTTTGCGTAAAGGCGTGTCCACGATTATG GAAT TAGCTGCTTTAGG GAAT GGCTATTTCAATGAT

GAAGCTCCATGAAATTTGGCTAAAGA GGGT AACTG GAAT CGGGT ACGCGCT ATTC ATTC TGTGCTTGT

ACTGCCAGAAGTTGCTAGCTCTCATTTCC ATCC TATTATGCCTGAAACAGCATTGAAGATTTTGGAAAT

GATAGCTCCAT ATTC CTTAGATCTAGGTTCCCAAG ATCC CAGATAGATTAC ACTC TCTTTGGACAG ATTC

TTTTTTGATT ACTC GGAAGAGAAAATTTCTCTGAAAGAGCCT GAAT TATTGTTACAATGGTA GAGT GAT

TC TCCACGGTAATCTTACGGAGAGAAAAGAG GGGT TTCATTTATAGA ACCC CTCTTTTTTTTGTGCAAAA

AGCA ATCC GCTCG GAAT ACATCACTGCAACTAATATTAGATAGCTTCTTAAATATATAACCGAGG GGAT TA

TCC TAGAGACGGTCTACAAATAGTGTAAAGGAGAGAAAAGAG GAGT TGTTTTGTAAAGAAGG GAGT GCATA

GCTTGTGTCAGCCCGGTACATCGGTGTTGAACCTTATCATTACGAACAGCAATAGCAACTGCTTCTTTG

TTCTACTAAAATGACTAGTTTTTTCCCTCGTGAATTTGCTGTATA GAGT AAGTTTCTATACAGCATCAC

GTAATGAGAGGTGT GAAT AGGAA GAAT AATACAGGAGGTCTCACTTCCTTGGTATTTGTGTATGGAAGTA

GCATAAGCTGGTATCAGGTCATT GAGT TCTGCTTGC GAATAACTAATATAGCGGCC ATCC ACGCAAACGA

TCAA ACTC TTTGTAGATAGGTCAATAGAGGTCACATAACCGATATCTCCGTT GAAT ACCTCTTTATTATA

GTTATTACGCGTTTGCATAACGCGATCTCCCGTAGAGAAG GAGT GAAATTTCCCTT GGAT AAACAGTTTA

TTAGGATTAAGTGCTGCTTTTAACTC TCTATTTAGATT GAGT ATTC CTAAT ACCC CTTTTCTCATAGGAG

CAAGGACTT GAAT ATCTTTGGTAAAGATACCAAATTTTTTAGGAACAAA ATCC GAAACGAGAT GAAT GAT

GTGTTAATCGCTTCTTCA GGGT CTTCTTTTTGAAAAATAAAAAGTCTTTTTTCCCTGAAGAGCTGTTG

AGAACC GG GAATTC TCCTTGGTTTACTTTATGGGCATTTGTAATGAT ATTC GAAT TTTGCAACTGACGGA

AGATTTTCGTTAGGTAGGTTACCTCGATGTGATGGGAAA GAAT AAGATCTTTAAGGACATTACCAGGGCC

TACGCTGGGAAGCTGGTGCACATCTCCAATTA GAAT TAGGAT AGCATGATCAGGCAGTGCAGCTAGAAAA

CGTTGTAAGAGAAT GGTGTGATC ATTC CAGATTC ATCGACAATAACAAGATCACAAATCAATAGGAT CTT

CGTG ATTC TTTTCGAAATGACAAGGTTTTGAAATCATACTGGAGAAGA GAGTGGAT AGTTTTGAGTACGTTT

CCCTGTGATTTCTGTCATACGTTTCGCAGCTTTTCTGTAGGTGCTGCTAGGAT TATTTTCTTAGGGGAG  
GAGATCTTTTCAAAGATAGAAA GGAT AGCACGTGTAATTGACTTTTTCTGTTCCTGGTCCCCAGATA  
TAATAT GAAT CTTTTGTGAAGAGCTGGCATGAAGAGCTTCTTTTGTTTTTCTTCCAATTTTAAATCCAG  
AAGATTTTCAACCTCCA GAAT CGTTCCT GGGT ATTGATAGATCGT ATTC GTTTAGAAGAAAACAAGAGT  
CTTC GAAT ATCAATCGCAATTTGTGTTTCAGCTAGAAAAAGTTGGCGCGACCAAATATAGGTATCTTGTT  
C GAGT TCCTTGACATAGACTGTCTTCGGCGTGACAAGAAAT GGAT TT GGGTAC GGAT TTCCTCTTCCG  
TATGATCTCCTCTGGAGCTTCTTC ATTC AACAGTTTTCTACGAGAACAATAAAAATCATTAAGA GGGTAG  
CAGGTATGCCCTTCTTCTGAAGTTCATCTAGA GAGT ATT GAATTC CAGCAACGATACGATTAGGG GAAT  
TTAGAGGG ACTC CTAAGCACGTAGCAATAAGATCAGCGTTTTTAAAACCTATACCGTACATTTCTTTGC  
AAGCAGAAAGGGAT CTTGACAGACCTTCTCGATCGTTTGATTTTGGTATTTTTTATACAGCCGTAAACCA  
TAAT GAAT GGCT ATTC CATGTGCTGTAGAAATAACAAGCATGACGTAGGTCTCTTTGCTCTTG GAGTT  
GCTTAGAAAAATCTTCGCAGCGGGCAGGAGAA ATCC CATCTACTTCTACCAATTTAGAAGGACAG GAATC  
GAGT ACTGTTAACGTGTCTTCCCCGAAGGTTGAGACAATTTTTTGAGCAAGTTGGGGCCTACGCCCTTG  
ATTTGAGC ATTC AGGTAAGCTATG ATTC CGGAAT CAGGACTATAGGTTGCAGCGGAGGTAAAGCGAAACA  
CTAATGCTCCGCTAGCATCTAC ACTC CAATGACCTGTTAAGTCTACAGAGGAGCCGATTTTGAACAAAGA  
GAGCGGGAGATGGCCACAAACAGTTACTAGT GAAT TTTTGTAAGGG ACTC GTAGGAAGGCGT ACCC TGTT  
TGATCGGACAGG GGAT CTTCTGGCA GGAT CAGCTCCAAAATACCGGAAAGTTTCTCTTCAACA ACCCATAT  
CTTTTTTA ACTC TCTTGGAAGT ATTC GATTTTTAGAAAGGCTTAAGTCCGGTGTCCGACAGCATTATAGATT  
C TAATAAGGCTCCGATCGGTATTTTTTATATTTA ACCC AAAAAAGAAGTCCATGGAAAAATGAAACTTTT  
TCAGAAT GTTTTT TAGA GGAT TTAAAGCGATTTGGTAGGCAAAAAGCAACCTTTAAAATACAAAC GAATC  
GCTTTAAAGAGGAT TTTGAAAATCGGTATTTAAAATTTAATTTGCTTC GGATTC CGTGGTTATAAG GAGTTT  
CTGAAG GAGT TTTCTGTTCACTGGCTTTTTTCTGAGCTAGAAGGAGACAGAGACTAGCTCCTAACATCAG  
AAAGA ACCC TAAACCTTCTTGAAAGATGGCATTTCCTGTTTACATAGGTAAGAAA GAATCCATCC AAAG  
ATGGGT TCAAAGATAAGAAGAGCCCC TAAAGAGCTGTAGACAGATGAAGAGAAGCTTTGTTCCAAGCTG  
CGATAGCTCGGAAGAGGAAAAA ATCC CCATAGCAGAGCAAGAACGAT GAAT AGGCATCTTTCGAAAG  
AGGGGT ATGAAATAGAAAATTAC GAGT GACAT GGGT AATACCGAAAGTATCTCCTAAGATAATTAATGGG  
AGACAGATGATGAGAGAGCTG ATCC CTAGCATATGGCACCATGTGTCGGGGGAGATTTCAGAAT GTTGCT  
CGAGAAAGTCATGGTTATAGATGATGT ATCC AGCCCAAATGCTAGTCGCTGCTGTGACACATCCGAATCC  
TAAGAGGTAGAGAGGCAGAGAAGAACT GGATTCGGAT TGGAATTC GGAGAC ATTC GACAGAAT GATTCCA  
ACTACAATGATGCC ACTC ATA CT TAAAAGAAAT GAGT AAGAGAGCATCTTTTTCTTAATATTG GAATAGA  
AGAGAAT GGCAATAGGGGCTA ACCC AGCAATGATCACAGTCACTGCAG ATCC T GAAT AACGTACAGCTTG  
TGCGATACCGAAATAATAGGCTATGTTAATAAGAAAGGCCACAG GGAT GCCTTTTTCCAGAGGAAAAAG  
GGAAGTGTTTTGAAGATATTAGAACGTTTATACA GAAT AGTGATCAGCGAACAG ATTC CGAAAACG GAGT  
AGC GGGT CAGCACAAATCTAGGTCAGCAAAGTTCCCTAGCATACTAG GGAT CACGAAAACC ATTC CCCA  
GTAGAAGCAGGCTAGGAGGCTATAGAAG ACTC CCAAAGGTGTATTACGAGAAGAGGACATT GGAT GAGGG  
GAGGACATCATGCTTAAAAGGCTCTCCAGCTTAAAAACTGCGCTCTAAGAAATTACTAAAATAAAGGACT  
TACGAGAACGAAAGTCAGGTAAAGACAAAAA GAGT TGGTAAAAAAGCCCTCTCTTTTTTCTCCTCTTCGT  
TTGAGGGAGCTTTAGCCC GAAAGGACCATTACAGGGCAATTAT ATTC CCATAAAGATTTTTCGTAAACAG  
TACCAAGAAGGGCTATTTACTGTTTT GAGT AAAGATTTTTAAACTATTTTCATAAATGGTTTGAAGTTCCCT  
TATA GAAT CAGAGT TGATAAAGCGTTTTTTTTGGTATAATGAGAAAAAGCTTTTTGTAAGGCAAAGAGAT  
GAAGCGTATCTTAGTGT ATTCGGAT AAAG GAGT TTCCTCCTTACTATTTGCGCCATACTGTTTCGCTGGTTG  
AAGCAGGTAGCTGCTCC ATTC CAGATGGAGGTATGTCGCGT GAAT GGACGTTTCTTG ATTC ATGAGCCTC  
TTTTGGGAAGAAACA ACCC AGCTTCTTGTA ATTC CAGGAGGTGCTGATGTACCTTATCATAATGTGTTGCA  
TGGACTGGGGACAGCGCGTATCGATAACTACGTAAGAGAGGGAGGCTGTTACCTAGGTATTTGCGCAGGA  
GCTTATTTTGGTTGCGCGCGGTTT GAAT TTCTAGAGCCTACAG GGAT CTTTATTTGTTGCTAAGCGAGATT  
TAGGTTTTTTCCCGGAGCTGCTAATGGTCCTGCTTATGAAAGCGCCTTTTTCTTATACAAGTTCCCTCTGG  
AGT TTTAGCCGCTCCACTAGTTTTTCGCTGATTTTCC TGAGAGA GAGT TTCTCTCTTTTTAATGGG GGAT GC  
TGTTTCGAAAATGCGGAACATTTCCCCGAAATATGCATCGAGGCGCGCTATAATAATCTTCTTGAAAAC  
CTGCAGCT ATTC TCTCCAGACGCCTCGATAAGGGGCTAGTCGTGCTTTCTGGTCCTCATATAGAGT ACCT  
CCCAGAGT TTTGCTCCTTGCAAGAAGATAATGTT ATTC CAGGCGAGAGAGCAAAATGCAGCAC ATTC TTCG  
AGT CTAGAG GAGT ACAAGCAGTTCTTA ATCC ATCGTCTATT GAGT AATGTGCTCGAGCACGTTTTGTATT  
AAAAATGCTCTCACCTCTTTGAGGAT GTGCTTCTCAGCATCAATAAGAACGGTTGCACCTGTCCTAGTA  
GACCC AATTTATCTTCTCTTCTA ATCC AGAAAATAAATGGTGGTTAGTGCTGTCTCGCTAACAGGTCG

TACAGGAGATAGGATACGCATATTCGATACATTACCGGGAAGCGTGTAGTGTTCCTTTTTTCATGAATACA  
GTAAAGAAATCTTCATAATCCAACGGGAATATGGGAGCGAGTTTCTTAGTTCTCCAATCCGCAACTTTTTG  
TATAACGCAACTGTTCTAAAGCGCAGAATAGTGCTAGCAACTCTAGAGTGCCTGCTTTTGGTGTGTGCAG  
AGGAGTTTTGAGGGGTCTAGCAATAAAATCTCATTAGATAGGTTGTGTTCTATGATCTGTGCATAGTGA  
CTAAAAGAGTTTTTTAAAGAGCTCTTCTTGTGTCAGCTGCTTGCCTTGAATAGAAATGAAGAAGGTTT  
CATTTCTGTATCATAATGTTGTTGTAGAACTCCTTCTTTGGCTTCGCGCATAACAAGGATTGCCGGAAGG  
TAATTGGTGTGCATAACCCACTCGACAGGTGAGAGCATTGGACTTGATGAGATAGGTATGTAGCGTTTCA  
AAATCCAGAGTGGATAGTGTGAGGGAGAAAGGCAAACGAGTGCACAGGATATGGTTCGAGGTTGCC  
CTGAATCCGAAGGGATGATTTGTGGTGTCCAGTCTGTAAAAGCTGCAGAAAGAAGCTTTTTCTGGGTGATC  
AAAGAAAACTTTTTATATTTAGGAGAGGCGCCCTTGAACATTCTTTTAAGCCAAGATTGGGGTATAGG  
CTTGAAATGCTTTGGATTCGTTTTAGAAAATCAATGAGAGAAGATGAGAGAGAGGGGATGGATTTTA  
CATACGACATCAGATGTTGAATTCGTAAGGGATGAGCTTCTGACACCCAAAAAACTAACACGGAAC  
AAGCAGAGCAAAGCAAAGTCCGGAGGCTATGAAAAGCCGGCGGGCCAGCAAAAAGGAATCCACACGATGCG  
ATGAATCCATAAATTAAGGAAAATAACACAGAAAAAATCACAAAAGCTTTGGTTGTTATCTTTTCAGCAA  
CCAAAGAGAGAACTTGTAAAAGAAAGTCTGTAAGGTGTGACATTCATTGGGAATATAGATGGTTAATC  
CTCTCTAAGAGTGCAATGCAACGCACTTTTTCATAGGGACTTTTCGTATTTCTGAGGCCTCAATGATGCCA  
AAATTGAGGAGTTAGAAAAGTCGCCCTCGACAGTATACTCCCTTGGAGCTTTTTTAGCATTTGGGCTTT  
CCTGTATTACGAGAGGGTTCGATAGAATTTTTTTTTAATTTTAGCTGAATTAGAACGCTATTTTCGCGGTGC  
AGTTGGTCTACCACCAAGAGTTGCAAACCAATTGGGGTGAACGGGAAAAATGAATAAAAAAGACTCCA  
TCACCTTAACGATGATAAGAAGAACTACGGATATGTTTTGGATCTATAAGAGAGAAAAAAGACTCCGG  
AGGATGGGTTCGAACCAACGACCAATGGATTAACAGTCCACTGCTTACCCTGAGCTACTCCGGAACAG  
TTCAAGCTACATTCGTCATGAGAAGGTAATAAAAAGTCAAGCAATTGCGAACAAGATTTTTATTTTCGAT  
GATTTCTTTTCGTTTTTTGAGAGTTCTGGAAGCAGATTTTTTTCATAACCTTTAGGCACCAAACTAGTTT  
ATGAATAAGTGCTAGCTCAATAACTTTCGGATCATCCCAAGAAGCCAGATGGGTGCTCAACTCTGCTGT  
TTCTCGAGAGCTTCTTTTTAAATGGGATTTTTAAATGAAACATGCGCTGCTGTAATCGCAGCTCTGTGTGC  
ATAGTTGGGAGATGGCTCTGTTCATAGACAAAACCACCTCCAAGAAGACAAAGAATAAGCCACCAAGAAG  
AATGACACATTCCTCATATACCTGAACCAAGAAGTCTGTTTCTTACTTGCCATACTCGTCCAGGAAACA  
TAGGGTTAAACAAACGGAATAGTAATCCCTTGTGTTTTTTGATATTTCCCTTGGCGTTCTGCATAAGATA  
CATCACAAGCAGCATCTCCTTCAAAGAAGAGCACTTGCAGATCCCTTCATTAGCATAGACTTTTCGCTGG  
AAGTGAGTAGTATTGAAATCTCGATAGTTACGTATCCCTCCACTCAGGTTCAAAGGAGTGACATTC  
ACAATCAATCCACAACGTGCGTAGGTTGACTTCCCAATACACACAGTAAGGACATTACGAGGGATACGAA  
AATATTCACGCTGCGAGCTAAAGCAAAGGAGTTAGGAGGAATGATACAAACATCATCCACGATGAAAT  
CAGCGCATCTTCTGTAACATTTTCGGATCGACAAGTGAATGTACACATTGGTGAAGACTTTGAATTC  
CTCGATATGCGTAAATCATACCCATAACTTGACAAGCCGTAGCTAATGAGTTTTCTCCAGTCTCTGGAT  
GCAGTTTCACTTGACTGTCTGCAAAAGGCTCTATCATACTTCTTCGATTGCCATTTTGGGAATCCAGTT  
ATCTTCCTAATTCCTATAAATTCCTCAGACTGTTGTTATCTATATTTCTAGGAAAAGACTTTAGTTAG  
AAAAAAGAGATAAAACTCTCAACACTACAGCATGTGCAATTGTATGAAAAGACGCAACTTTTTAATGCC  
TTTTGTGCAGAGGTTTTTTCTTTAAATAGTCTTTTATATAGAGAAAAAGAAAGGATTAGAGATAGGGGAAT  
CCCTCTTGACTTCAGCCGTTGGAAGGATGTCAAAAATACGATTTCTTGATTTGGATTAGCGAATAAATACT  
ACTATTGCGAATACTTATATGACTATAAAATTTCTGTTTTACATCAGGATAAAAAGTTTGATTTTTCTT  
TAAGGCCAAAGAACTAACAGAGTTTTGTGGGCAAAAACAATTGAAAGAAGGATGGATTTATTTCTTCG  
AGCTGCTGTCCAACGGAATGAAGTCCCCGGACATTTGTTATTTTATGGTCCCCAGGTTTGGGTAAAGACT  
TCGCTGGCACATATATGGCTAACACGATAGGAAAAGGCTTGGTAATTGCTTCCGGGCCGAGTTGTTAA  
AGCTTCCGATCTCATAGGACTATGACCGGTCTACAAGAGGGAGATATTTTTTTCATCGATGAAATCCA  
TCGCATGGGAAAGCTGCTGAAAGATCTCTATCCGTCATGGAAGATTTTAAAGTAGATATTACCTTG  
GATTCAGGTCCCGGAGCTCGCTCAGTGCCTCAGATTTAGCTCCATTTACTTTGGTAGGTGCGACCCTC  
GCGCTGGAATGTTAAGCGAGCCTTTGCGTACGCTTTTGCTTTTACTGGGCGTGTAGATTACTATACTGA  
TGAAGATCTTGTTCATTCCTTCTCGTTCCTCTCAGTTGCTCGCCATAGAAGCCAATCAGGAACTCTA  
TTAGAGATTGCTAGAAGGGCTCGAGGGACACCACGTTTGGCTAATAATTTACTTCGATGGGTGCGTGATT  
TTGCTCAAATGCGAGAGGAAATTTGATTAATAGCGCCGTAGCAGAAAAAGCTTTAGCTATGTTATTAAT  
AGATAACTTAGGGTTAAACGAGATTGACATTAAGCTTCTCTCCGTGATGATTGATTTTTATCAAGGAGGC  
CCCGTTGGAATGAAAACGCTCGCAATGGCGGTAGGGGAAGATGTCAGAACTCTGGAAGATATGTACGAGC  
CCTTTTTGATTTTTGAAAGGTTTTGGTTCAGCGAACCGCAAGAGGACGGGTGCAACCCCTTTGGCATATGA



ACATCTTAACAGGA**ACCC**TAAGGACAGGTGGGAGAA**GAAT**AAAGTGAAAAATTAATCT**ACTC**GACT  
GCTAG**GAGT**TTTTTGTGGTGTAAAGCGGTGTTGGAGATGCAGATGTTAAAGT**ATCC**GATGCCCTATCGCAA  
TCT**ATTC**TTGTGCAACCAAAA**ATCCGAGT**TCTTTTGCTCAGTGAAAGTACTACAGCTTTGATTGAGGCTA  
AGGGAGCTTTTTCAGT**ATTC**GGAGATGGTGAAGCTTTTAC**GGGT**TTCTTCTCAAGGACAACGTTGTGCGGC  
GCATGCTTTGTATGGAGGC**ATTC**GTTGGGAGAG**GAAT****ATCC**CAACGTT**GAGT**GTCTAAAAATCGAACCT  
CTTGATGGAGCAGCTCGCTGTTTGTAAATGGT**ATTC**CAATACAA**GGGT**GCTATCTAT**ATTC**ATAGAAC**GG**  
**AT**CGCAGCTGTTTGTTCATAGTGAACGAGCTCGCGGTAGAAGACTATCTAAAGTCC**ACTC**TTTCCGTAAA  
ATATTTGAAG**GAAT**TAGATAAGGAAGCTTTGTGAGCTTGTGTGATTTTAGAGAGAACGGCTCTTTATGAG  
CGTCTTCTTGCTGGAA**ATTC**TCATAGCTTCTGGCATGTCAATGCTCAAGAG**GAT**CGTTATGGA**GGAT**TTG  
GTGTTACGTCGCAGTTTTATGGTGTAGAGGAGGCTGTAGACTGGACCTCTCGATTGGTTCTCGATA**ATCC**  
GGAAGGGCTAGTGTTTAATGCAGACTATCTATTGCGAGCAAATGTAGACCCTTAGCTATAGAAGGCTAC  
AATGCTCGGCAGATTTTAGAAAA**ATTC**TATAAAGATGCAGATCTCGTGGTGATT**GAGT**CTTGGGAAGATG  
ATTGTAAGGTGCTTAGAGGCAT**ATCC**TAAGAAGCTTGGTAGCAAAAAG**ACCC**ATCTCTAATGAGCT**GGG**  
**T**CTTTTTTATCTAG**ATTC**CAAGGAGGTTTTTCTTCTGCTGATGGCTACCAAAGAGCTATAAGGTTCAAG  
AG**GAGT**TTGGGAGATAATATCTGAGAAAA**GAATCC**TGTTGTGCTATCTACAATTTTTTTCATAGGCCAAA  
TGTTCTTTTTCTAGGTTTAGGTAAAAGAGATCTCAATACGTT**ATTC**CCACTATAAAACGCTAC**GAAT**AAAC  
TGTAGTTCAGGTGTTTCA**ACTC**AAAAGCTAGATAATGATCGGCTCCCC**ACTC**TCTGGGAGAACCTTTTTGT  
ATTTAGCCAGGTAATCGTATCTTCTGATAAGAAAGAGGTATT**GAAT****AATTC**GGTATAAGCTTTGCGCAGA  
GCAATGACTTGGCATAAGAAAGAAAACAGTTCTTTCTTTTCAGCTAATCGAT**CC**CAAAGAAAGTAATTGA  
TCTTAGTGTCTAAGCACCAGTGATTATTTATTTCCATAAGCTGTGTGCCAT**ATTC**ATCTCC**GGAT**TGTAT  
CATGG**GAATTC**CTTGAGATAAAAAGAGAGCAAGAAAGAAGTTTTTCATTTGGCGTTCACGTAGAGCGCAA  
ATGGTGG**GAT**CTGTGCTTTCTCCTTCGCAGCCAAAGTTATAGCTATAGTTTGTGTAAGTCCCATCACGAT  
TGT**ATTC**ACC**ATTC**TCTTCATTGTGCTTATCGTTATAGGCAACAGTATCGTAG**GAGT**GTGAAGCCATCATG  
AGAGCAGATATAGTTAATC**GAGT**TCGTAGGTTTCCCATTTGG**GAT**AGATGTCATGAG**ATCC**AGAT**ATTC**GT  
GAAGCAAAGGAACCTTACTTGATGAGCATCTCC**ATTC**AGGAAGGCTTTTACATGGTCCAGGTAGC**ATCCAT**  
**TC****ACTC**GCTCCATC**GGGT**TGATATAGAGGGGAAGTGTCCAAGCTGATACAAACCTCCAGCGTCCCAAG  
TTCAGCGATCAGTTTTAGTTTTCTGATAAAATG**GAAT**CAGAG**GAT**ATAGCTTGCAAAATGG**GGGT**TAAAGGG  
AGAGGG**ACTC**CTTGT**GGAT**CTCTAGAGAAGACTGAGGCTAAATCAAACGAA**ATCC**ATCTACGTGCATTT  
CCTGT**ACCC**AGTACCGCAAAGCATCA**GAATCC**ATTTCA**GAGT**AGTGG**GGGT**GTTGGTATTGACTGTATT  
ACCAC**ACCC**GGAGAA**ATTC**ATGAG**ATCC**CCATGATCATTGACCATATAATAG**GAT**TTTTAGATCT**ATCC**AG  
GGAAGAGGGCAGCTTGTGCCCTTCAAAGCCTGTATGATTGAAAACGACATCGAG**GAAT**GACTTCG**ATTC**CCG  
CACGGTGTAAACGCTTTGACAA**GAGT**CTTGA**ACTC**TCGGGCCGGAGCGCAAG**GGT**CTGCCCCATAAGTATA  
ACGGCGAGAGGGGCAGAAAA**ATTC**ACCGA**GAAT****ACCC**CAATAGTTACACAGGTGGGGGAAGTCC**TGA**  
TTTTTAAAT**GGAT**GGACGGTTTCATC**GAATTC**GAAAATAGGAAG**GAGT**TCAACTGCATGAACGCCTAGTT  
GTTT**GAGT**GGTCTATTTTTTTCGATGATACCAAGGAAAGTTCCAG**GAT**GGGAAACCTGGGAAGAC**GGATC**  
TC**GGGTGAAT**GACCGAACATGCATTTCTATAAATGAAGTAATTTCTTTTGGAAAGGTGCAAAG**GAGT**GTG  
CCTTCCAGTCAAA**ATCC**TCATATTT**CAGG**TAATAATGCGTA**ATCC**TTTTCTTGTTTAG**GGATCC**AA  
ATAGTTGAGGG**GAGT**AGAT**ATTC**TTA**GAAT**AA**GGGT**CTGCGATGTAA**GAAT**CTGTAGCAAACCTTTGAGA  
GCTCAAGTCTGTACCACGTAGTTTATAAGCATAACGACC**ATTC**ACTAGAAATGCCTGCAATTT**CGAT**ATGC  
CAGATGGCTCCAGTCTGTGGTCCGGTAGAAGATAGAG**GAAT**TT**CAT****GAAT**TT**CAGAA**AGAG**GGT**CTAATA  
GTACAA**GAGT**AACCTGCTGGGCTTGTGAAGAAAATAGAGAAAAACGGTAGCGATCAGCGGAGAGCTTTTT  
GGCTCCTAGAGGTAAAG**GGAT**AGTGAACGAACAGACAAAG**ATTC**CATAAAA**ACT**AGAACAAGTAAGTTT  
AATAAAAATCTAACCGAAGAAATGAAGAGAAGAGGGGGGGGGCTTAAACACAAAAGGAAGAGAG**ACCC**TC  
TTCTTTTGTGTATGATAGCAAA**ACT**TTTTATGCAC**GGATTC**CTGCTGGAGGAGGTT**GAATTC**CTCCGCC  
**ACCC**CCTTGAGGCATTTGTGGCATGGTATCAACAGT**GGGT**TCTCGTCCAGCGCTGATATCAGAACAACA  
GTTCCG**CAT**TTCAACCGTTTCAATAAAAAGCTGTGCAAAAGCTTT**GAGT**AGGTTGGTCTCTGCATACT  
TCATGTCTAACACGCAGTGCATTAAGATCAACTGTTCTTAGTAGCG**ACTC**CT**ACCC**CTCCACCAGCCAT  
TTGGCTCCGAGCATAGAGCCTTCTAACA**ACT**TCTCATATAGAGCTAACTTTCTTTG**GGAT**TGCTGGC  
AGTCCGTCAAGAAGAGGTTGCGTAAACATAAAGGGGATCA**GAGT**GTTCTTCGTAGGTCAGGTGAAGAGAA  
**ACTC**TCCATCAACAAACAAAATGCACGATT**ATTC**TGATCGAAGGCCACGTCCGG**GAGT**TTAAGCTCTTT  
AGCAAAATTTTTTAGATTTTCTCAGC**ATTC**TGCCCTGGACATGAGG**GAAT**CTCCTTCGTACTGTTTTTTTT  
TAAACCTAGCATAAGCAGGTTTTGTTAGTAAATGATTAGAGCCCGATCAGGTGATTTGCTGTTAGGCAAG  
GCCTTCTATCGAGGCTGGTGGCAG**ATCC**CTCTTCG**GAGT**TTCTAATCAACTAGGTCGTCTAGCTGGTA

AGAAAATAAGAAGGCGCAAGCTCGTTCCTTCGGTCTATTATGTGTTGAACGTACGCTTCTAAAAACACGC  
TTTAGTTTCGGTAACTTAATCTAGCCGTAGATCCAACCTAGGGGACATTGTCACAGGATATTTTTTTTGG  
TTATTTTCCGCAATACTCTATAGAGAATACTTGTATTCACGAAAAATCGGTCTAGTGTACAGTTTTCT  
CTGAAGATAAAGAGGTTCCGAAGGGACGTCTTTTATTTGAAAAAGAGAAATTCACAGGAAGTTTCGTATA  
GATAAGGATGGTTTTTTATGTTGTTCCGGATATTTGGTAGGATTTCTAGCTGCCGATCCTGAAGAAA  
GATGACATCCGGAGGTAAACGGGTGTTGTTTACGTTGGGTGTAAAATCTCGTGTAGGATCTAAAGATGAA  
ACAGTGTGGTGCAGATGCAATATCTGGAACAACCGTTATGATAAGATGCTTCTTATTTGAAGAAAGGTT  
CTTCAGTCATTGTTGCTGGAGAGCTTCTTTAGAAAGCTATGTAGGTAGAGACGGTCTCCACAAGCTTC  
TATTTCTGTAAGCGTAGATACATTAATAATTTAATTCGGATCTTCTCGTCTGATGCTAGAGGTTTCAGAT  
GAAGGTCGTACAGAGCTAATGATAATGTCTCTATTTGGATTTGATGGAGAAAGTTTAGATACAGACTCTG  
CGCTTGATAAGGAAGTCTATGCAAGGTTTGGAGAAGACCAACAGTATGCTAGTGAAGGATGTTCTTTTTA  
GTTACAACCTACAAGCTGTTCTTTCTGGCCTCTTTTAGAAGAGATTTCTTTTCAGTAACAGGGGCCTA  
TTCTATTCATTTGATTCATCCCATATCTTAAGAAGCTCTTGAATCTTCTTGTCTATAAGGTAAACAGAGC  
TTATTTGCTAAAAAGACTACTCTTCTATAGTCTTTTTTTTCATCTCGAATATGTAGAGATGAAAAC  
CGTGTGTTTTGCTTGTCTGGCCTTTTCTACTGCAGAGAATGGGTGAGCCGCGCAGCTTGAGACGGAAA  
TGGGCAAAACCGCTTCTACTGGTGTTTAATTATTGACTCAATCGATTCACAAAAGAGGTTATTGTGGTAT  
TACTCTATTCCTCAAGCAGGTGAGGATCAACGATCGAAAGCGGATGCTCTTGTCTTCTCTTTTTGGATGAA  
GAATTCATAAGCTCAAGAAGCTGCAGTTGTTGATGAGGACTACAAGCTTGTCTATCAAAACGCATTTATCC  
AATTTTTTCAGGGAAAGAAAGGGGAAACAGCTTTTTCTTTTTGGAAAATGATCACACAAAAGAACAAAAAATTG  
TTCTTCTTGGTCTAGGGAAGAGCGAAGAAGTATCCGGAACAACCGTTTTTAGAAGCCTACGCTCAGGCTAC  
TACTGTTTTAAGAAAAGCTAAGTGTAAAGACTGTAAATATTTTTATTCACCAACATTTACAGTTGCGCTTC  
TCCGTAGAAAGGTTTTTAACGAACCTGGCAGCAGGGGTGCTATCTCTGAACATAAATACCCAACCTATC  
ACAAAGTGGATACGCTTTTGCTTCTCTAGAGAAAGTACTGTAAATGGGTATTGTCTCTAAGGTAGGGGA  
CAAGATCTTTAGAAAAGAAGAGAGCCTATTTGAAGGGGTATATTTAACTAGAGATTTAGTGAATACCAAT  
GCAGATGAAGTCACTCCAGAAAACTTGTGCGGTAGCAAAAGGTCTAGCAGGGGAGTTTCGCGAGTCTGG  
ATGTAAAAATTCATAGATAGGAAGCGGATATTAAGAAGAAAAATGGGATGTTGGCTGCTGTTGCCAAGGG  
CGCTGCTGTTGAGCCTCGGTTTATTGTTCTGGATTACCAAGGTAAACCTAAATCTAAAGATAGAACCCTA  
CTCATTGGTAAAGGGTAAACATTCGATTCGAGAGACTAGATTTGAAACCTGGGAAGGCAATGATTACCA  
TGAAGGAAGACATGGCTGGAGCGGCTACCGTTCTAGGAATTTTTCTGCTTTAGCTTTCCTTGGAGCTTC  
GATCAATGTGACCGGATCATTCCAGCTACAGAGAATGCGATTGGATCGGCTGCCATAAGATGGGAGAT  
GTATATGTTGGAATGACCGGCTTCTGTAGAAATTTGGCAGCACTGATGCGGAAGGGCGTTTTGATTTT  
CAGATGCCATCTCCTATGCTTTGAAATATTGTAATCCATCCCGCATCATTGACTTTGCTACCTAACGGG  
TGCTATGTTGTTCTTTAGGAGAATCTGTGGCTGGATTTTTTGCAAATAACGACGCTGTTGGCAAGAGAT  
CTTGCAAGCTTCAATCAGAGACCGGGGAAGCTCTATGGAGAATGCCTTTGGTAGAGAAATATGACCAGG  
CACTTCATTCAGATATTGCAGATATGAAAAATATCGGCAGCAATCGTGCAGGATCGATTACTGCAGCGCT  
ATTTTTACAACGTTTCTCGAAGACAATCCAGTAGCATGGGCACATTTGGACATTTGCCGGTACTGCTTAC  
CATGAAAAAGAAAGGTGCTTACCCCAAATATGCAACAGGATTTGGTGTGCGTTGTTAATTCATTATA  
TGGAGAAATTTCTATCTAAATAGTTATTGTTTAGCGATATTAATAATATGTGTGTTAGTTTTTAATAA  
AAAGTTAAAAACTAACCATTTTTTATTAAAGTTTTTCATTCCTTGTGCGATAGATCAATAAGTAGTAG  
TTACCTGTCTAATTAGGGGAATGAACATGTTGGGAGTACAAAAGAAACGCAGCACAAAGAAAACTGCTGC  
CAGAAAGACTGTAGTACGTAAGCCTGCCGCTAAGAAGACGGCAGCTAAAAAAGCTCCAGTAAGAAAAGTT  
GCAGCTAAGAAGACTGTAGCCCGCAAAACAGTAGCTAAAAAACTGTAGCAGCTCGTAAGCCTGTAGCTA  
AGAAAAGCAACAGCTAAAAAGGCTCCAGTAAGAAAAGCTGTAGCTAAGAAGACTGTAGCCCGCAAAACAGT  
AGCTAAAAAACTGTAGCAGCTCGTAAGCCTGTAGCTAAGAAAAGCAACAGCTAAAAAGGCTCCAGTAAGA  
AAAGTTGCAGCTAAGAAGACTGTAGCTCGCAAAACAGTAGCTAAAAAACTGTAGCAGCTCGTAAGCCTG  
TAGCTAAGAAAAGCAACAGCTAAAAAGGCTCCAGTAAGAAAAGCTGTAGCTAAGAAGACTGTAGCAAAAAG  
AGTAGCTTCAACAAAAAAATCTTCCGTAGCAGTAAAAGCTGGAGTTGTATGAAAAACATAAACATACT  
GCAGCTTGTGGACGTGTAGCTGCTTCTGGTGTAAAAGTTTTGTGCTTCTGCAGCTAAAAGAAAAATGAATC  
CTAACCGTTCTCGTACAGCTCACAGCTGGCGTCAACAATTAATGAAATTAGTCGCTAGATAGTCGTATCG  
CTTTTCGATGATTTTCTAAGTAGCCGGGAATAAGAAATTCCTTTTTCCCGGTTTTTTGTATTTATTGGCTGA  
GTTCGAAATGCCTTAAGAAGATAAAAATCTGGGAACAAAAAGAAATATCCCAGAATATTGGGTTTTGGCGA  
TGGATATGGGAAACAGCCAGAATAGTATTCACATAACGTCTACTAAAGATTTTGTTCAGTATATTGAAC  
GTGAACGATTTAGAGTGATTGTGATTGGCTCTTCATCTCTTGAGGACAAAGATATCTTTTCGGAACTTTA

TATTTCTGGAAGGAAGAGCTTTTTTGACGGACAGCGTTTGTGCAACAAGAGCTCTTATCTTGACGGAT  
CATTTTGGTTTGTTCGCTTCCCAAGAGACTATAGGCATTTATCAAGCAGAGAAAATGAGCTCTTCTCTAC  
AAGAGTATTATTATAGATTACTCGGCATCCTAACCCGAATCTTACGTTGTTCCTTTTCCAAAATAAAGC  
AGAGTGTCTCTCTTTATCTTCGAAGCTTTCTAATGCTCTTGTATTATCTTATTTGGAGAGTATTTT  
GCTGAGCGAGATGCTCGCATAGCTCAGGTTTTGATAAAACGTTCTAAAAGAGTGCAGCTTTCTTGCTCTT  
TAGAGTGCAAAAGATTTTTGTAGTAAGTTTCTCAGACAGGTTATTTGAAATTCCTTAGTGAATTTCA  
AAAGTTGATTTGTCAGATGGGAGACAAGGAATCTATAGAAGCTTCGGATATTCATCATTTGTAGAGAAA  
AAAGAGGCGATCTCTCTGTGGAAGTTGCGAGATGCTCTTCTCGTAAAGACCGTGTGCTGCACACAGTC  
TGATGAGATCTTTGGTGTCTGATATGGGAGAGGAGCCTCTGGCGATTCCTCAACTTTTTACGTAGTCAGTA  
CCTCTTAGGACTGAGGGCAGTGGCAGAGCAGTCGAAAGAGCGTAAAACACAAATATTTATTGCTGCAGGA  
GAGCCGGCTTTTTAAATGGTTTGAACCTGTTTTTCCATACGGAAAAGTTAATTAAGAACTTCCAAG  
ATCCCATGCTTTCATTAGAAATGCTAGTTTACGACTTTAGATTTTTATTTGATGGGATTTTTTCCCTGT  
ATATTTTTTCGTAAGCATTTTTAGAAAGTCTCCAGTCTAATGATTTAAGAACTTGTGGCTATGGC  
GCTGTATCTTCTTCCCAATACTTTAGGTAGTAAAAGATCTGAGGACCTTCTTCTCGGTTGGAGAGATT  
GTTTCGGAATAAATCCAGGGATTAATAGTAGAAAGTGATCGTGGTGGGCGGTTATTCCTAAGTTTATGGA  
AAGTAGAAGAGCCTCATAGGTTTCTTCTGCGGTGATGAGCAAAGAACTTCTGTTAAGGCTTGTGA  
CTTTTTATTTAGAGCCTATTCACAAGAAGCAAGAGTCTTGGGGCGTCATTTCTGATGCAGGGTGCCTTGT  
ATTGCTGATCCGTTGGGCTAAGTTAGTCCGAAGAGCTCGACATTTGGGATCCCGTGCATGCTGTATCTG  
GCCCTTGCTCGATTACGCAAGCGTTGATGCTCTCTGGACTACCAGGGCAAATTTACATTTTATGTTA  
TTTTGCCCAAATCCATAAGAAAGATCTCGTTATTTGCGAAGTTGCTCCGGAAATCCCATACGCAAATC  
TGTATAGAGACTCCGTACCGTAATCCATATACGTTTATGATGCGTTATTAGATCAGTTCCGGATCATGGCG  
AGCTTTGTGTTGCGATTGATTTAATGGGAGATCAAAGAACTTCTACGCGAAGCATAGCCGTATGAA  
TCAATCTTCTGATATCGAAGAGGTTCTGTGAGCGTTTGA AAAAAGTTCCAGCTATTTTTCTATTTACT  
TCTTTTTGATTTACAGTATCCGCTAGTTTGTGTTTGTGTTAATTTAATTTTTCTAATTA AAAAGAAA  
TTAGAAATTAATTAATTA AAAAGACAAAACATGAACAAAAAATAATTAAGAACGCGTTTCTTCGTCTGT  
TCCGTCGACACCTTCTGATCAGCCTGCCGATCCCACGAATCCGTTACTAAAATGCTATTTGAATGCAAG  
CTATCTCAGAATCAAGGGACGCTTCTGCCGATGTTGATGCGATGGTCACCACAGCTCATGTCAAGCTAG  
ACGCTAAGAATCAACAAGTTCTGTAAGGTAGCTAAAAGGGGAAGAAGACCAAATGTGATTGTACTCTCA  
GCTTGAAGGATACTTACAGAAAAGGATCTCGATCGATCGCGGGATGTTTCTACCGACTTCTGGAGGGCG  
ATGGTTGGAGACATTAATATGGGGACAAGCCAGGGAATACCATCAAAGGGCTTCTTCTTCTGGGGAT  
CCGCTATGTTCTCGGGAATGAATATGCAGCTTCTGTAGGGATGTTACAAGATGTTGTGCGGAGAGTATAG  
AGCTCGGTTGGATGATTTGATTGATAGAATCACTAAGTATGCTGGTTCCAGGAGAAGGTAGTCTGGAGCAG  
CTCATCAAAGATCTCGGTAGCCCTCAGGAATCTCAGGCTGGACAGACGCCTTCTGTACTCTAGAGAAGC  
CTACAGATGCTAAGTGGTTATTGTTAAGCGCTAAGAACGCTATGACAGGGACCTTGCCTTTTGAGAAAA  
ACAAGGAGCTTTGCCAACAACTCCAGATCCATACGATAACAAATCTGAAAGCGGGGGGATTAGGAATATT  
GGAACAGCTACTCCGAAAGATAAGTTACAGAATATAGTTTCTGTTGCCGACCTCACAACTACTGAAAG  
ATTTACAAAATAATGCTCCTTCGGAAGGAACAGGTTACATACAGGTTCCAGACGTGGATCTAGATCTGG  
TTCGGGAACGGACTCAGTATCAGGGGTGTAGCAGGTGCAAGTGAAGCACAACCACTGCATCGACCTTC  
CCAAGAGTGGACGGGACAAGAGGTGCCTTATTTGGTGGAGCAATCCCGGATTCGTTCCAGGTTCACTAA  
GTGTACAGAATCCCTTAAGTCTAGTAATGCAGACAATTATATCAAAAAGGATAACGGGACTTATTCGCT  
TTTTGCGAAGAGGTCTTTATCTTATCACCTTTGCGTACGAGTTTGGTTCTCCAATACAAAATGGAGCTGTT  
ACCTGTACAGGGACTCTCAGAAAGAAATCTGATTC AACATCTGCTGGAGGAGATGTGGCAGCTCAGCCTA  
CGAGTGGGATGCTACAGCCCAACTGATCCAGAGCCTTACCAGCATTTTCCGTGGTAGGCTCTTCCGA  
TGGGAAAAGTGTAGTTGGAGTGCATACATTTTAGTCCCAGGGGACAAAGCGCTTCAAACATACGCTA  
ACTTTGGCATTAACTCTGGTAAAAATACAGAGGTGAGTCTTACTTTCAGCTACAGCTTCTAAGAGTTATG  
TAGCTATCTCATATATGGGCGCTGGTTATTAATATTTGAGTTAAGGGAGAGAATCTCCCTTAACATTTT  
ATACTGAATCGATGTGATCTTTAAGGCTGTGATGGTGTGCAAGGCGTGGATTTTGCCTTAGTAATTTCTC  
CTGAAGTTAATACCAAAGACCAGGAAAAAGATGTCAAAGTAATACCTGTAGATGTTGTTTCTGGTGGGT  
GCTTTCATCGGCTTGGACCTTTATTTGGATTTTTTGTGTCGATCCGAACTCTGTAGTTGTGGTTGATGCA  
TACC GAATCTGTATTC TGCTTGTCTGGCTGGCTGGAGCATTATTGGTACCGGATGATGACGTAGGATTTT  
CTTCTTGTGAGTCTCCTCCAGATCCAGA ACTTCTCCCGAGCTGTTATTTATTTGGATTAACGTATTTTCAG  
TTTTAATACAGATCCAGTTGCTTGCACGGGTATTTGTAGTGTGCAAGATTGTCCTGAAGCGAGCGAGAAT  
TTTTTAGTAATAGGATCAGGTGTTGTAGGGGTAGTAGGAGTGGGTGATGGAGTGCAGGATAGGTTACT

TCCTTGAGAAAGTTTTTCGTTATAGATGCAGTTGTCGGACCGTTAGTTGCAGGAGATGACGTTGCTTCTGA  
AGTTGTTTTCTTTGGAGA**GGAT**GATGGAGATTTAG**GAGT**TGTGTCTGTTTTTTGGAG**GGGT**TACGGTTAGC  
TCTAGAGAAATA**GGAT**CTGTAGATGTTG**GAGT**TGTGTTGTTTT**GGAT**GGTTCCAGGTTCCCTTGCATGGAAA  
AGGTAA**GAATACCC**GTTTTTT**GAAT**TACCATTTCTGATCGTGAA**GAGT**CTGAAAAGGAAAA**GAATTC**CTC  
CCATAAAGGAGATTTTTCCGA**GAAT**GTAGTGTTTGGGAGATCAGTGCCCTCGGCAGCCG**GGGT**TATTTTCG  
GTATCAGTTGAACAGTAGTAGTGGCAGCTAGCTCTCTAATAAATGAGGAGGCTCCGTTTTGAAGA**GGAT**G  
GT**GGAT**TGTTCCGGTGTGTTGCTGTTGTCTG**GAGT**AGTTGGTGCA**GGAT**TTG**GGGT**AGGAGCTTGTAGCCA  
GTTAAAAT**ATTC**AGAAACGGTGATATTGGAAAGGTTTGTATCGTTGTTTTTTAGAAAAGCCATTTGTGGA  
GAGGTGATTTTGGCTTGTACAA**ACTC**TACATTGATAGCACTTTTGGTATCTTTATTTGTGG**GAGT**TCCTA  
GATCAGATACGGTATTACTGTTTCATATCAATATTTTCGTAAACAGTCCCTCCACTTGTTTTCAGAAGATC  
T**GGGT**TAGTGACAGTGTCA**GGAT**CTTCAGCAATACCGAGAAGTTGGTGTAACTG**GGAT**ATTTGT**GAGT**TA  
AT**ATCC**GATAGGCCGTCGACAGCCCGTGAATTTTTGTCACTACTTTTGATTTTCATCTGCTTTCTC**ATTC**A  
AATAACCGATAGTGACAGCAGAGCCATCATCA**GGAT**CTTGTTGACCGTTTTGCTTGTACATCACAATGTC  
GGTGACATTGTTTTCCCTGCATGTCAATGTCCCAGTCATTGTGCCCCCTTTTGT**GGGT**AAGAAACCAGGA  
**TTAGGGT**CATTTTCTTTGGTGTAGTTTTCTTTTAGATATTT**GAAT**GTGACTGCATCTGTGGG**ATTC**TTTAG  
**GATTC**CTCGATTGTGTGAT**GGGT**TGGTTATGTTAACAATGCCAG**GAGTAGACTC**AATGCCTGTCTCACT  
AACCTTTAATAAGACTTTTTGTCACTACTTTATTA**GGGT**TCCAAAAGGAAGAAGAAATATTATTTTTTTATA  
TCGTTCAATTATTTTCGTTTTTTAAATCTTTTAACTTCGTAAATCTCTATACTATCTTATTTTTTAATCATTTT  
T**GAAT**TAGGTGATGGAGACGAAGGTGTTTTTGTGTTGGAG**GAGT**TGTTTTATTTGGTTACGGTAAC**ATCC**  
GTT**GGAT**ATAGAGCTGCTTCCCAAGACCAAGATGATAGTGTATTGTGTAGTATCACCTCCTCCAT  
TAGAAGTTTGGGAGGTAGTTGTAGCCATTTTTTACACTAGATGTAGTCGTAATAGGAAGTTGTAGTTGTAC  
AG**ATTC**CCCAGAGTATAGTGTGAGAG**GGAT**AGTGAGCGTTTCGGTTGCTGAAGATGATACTGAACCCTT  
CCTCCATTAGAAGTTTGGGAGGAGGT**ATCC**ATTTTTATGTC**GGAT**GCGGTCTTAATAGGAAGTTGTAGTT  
GTACAG**ATTC**CCTAGAGTATAGTGTGAGAG**GGAT**AGTAAGTGTAGTTGCTGAAGCGTCTCCAGAA**GAGTC**  
TG**ATCC**GCTACTAG**GGGT**ATTGGTTCCTACTAGAATTGTCTG**GAGT**GACTGTTAGTTTACGG**ATTC**ATGGTC  
TT**GGGT**GTTTTGTGACTTCCATCAGCTATTGTGGCAGTTGTAGG**ACTC**CACGTCCCTCTTACAGATAAAA  
CCAGTAGGCCGTCGGTTTTTTACTTTTTAGATTTTCTTGTCTGCTGTAAAGCATTTGTCCGGCTAGTT**ACT**  
**CTTAAAAT**CAGGTTCTGTAGGAGAGGAAG**ATCC**GTTTGTGCTGCTGAGCCATG**GGAT**GT**ATCC**ATT**GAAT**  
GAGATTGTTGGAGA**ACTT**GTGCGTAGTTGGAA**GAGT**ATTGGAAAGAAAAGCTCTCTTAGGTTGTTT**GAGTT**  
TGG**ACTC**CAGGTAGTTACATTGGCTGCATAATTACTGTCCAGT**ATCCGGAGT**TTTGATATTGGCGAT  
CTGTGCGTTGGTCATCTTGAG**ATCC**CCTGTAAGCTT**ATTC**TGAGATTGTGTCACCACAACTGAGC**ATTC**  
TTAATTACTGAAGGAGATCGTCATAAGATAAAGGAGGAG**ATTC**CTTTTCTCTGTATCTGTGGTAG**GAG**  
**TAGGTT**TAGGTGTTTCTGGTACA**GGAT**CGGTATCAGCGTCGGGGT**TGAT**CGTAATTTCA**ATTC**CGAGAGC  
TTTTTGAGCCAATGCGATTTTTTTTCTACTT**CAGTAGCAGAAT**TTAGAGCTGTGCTTAGTTTGT**CATTA**  
**TTC**AAAATCTTATCAACAATACCTTTGACATATTTACAGTAGCTGCTTCT**GAGT**AAAAAGCTTCCCATG  
CTGCATTGTAATCATCGATTTTTTTCTGGT**ATTC**TGCCAGCTTTGTGTTG**ACTC**TTTGATCGCTTGTTC  
TTGTTTCTCGGCTGTTTTTTTTGTAAA**ACCC**TCTTCTTCTCGA**GGAT**CTTTTGGTTTAGAGG**ATTC**TTCT  
GGAA**GAGT**TGC**GGAT**GGTTTGGT**GGGT**TGCTTCAAATTAATAACG**GAAT**GTGTTCCCATATTAATGTTCC  
CAGTCATGCTTCCCTCAT**GAAT**GGGAAGATAATCT**GGAT**TT**GGGT**CATTTTTAGATAGATAGCGTGCTTG  
AAGGTATTGTAGTGGCACAAC**ATCC**GTATCAC**GAGT**CGGAGTAGCT**ACTC**CGCTTAACTTAGCTTCGTTA  
TTAAA**ACTC**AGCTTAGT**GAAT**GAAGAGAGCTGTTGTGAACCAAT**ACTC**AGTAAAGCTCTAGT**GGGT**GTAT  
TTCGTT**GGAT**TTTTCGTAGATGCGTTTTTTTTATTA**ATTC**CGTTCTTTTTT**ATTC**ATTTTTTCAATTA  
TTAATCGATTTTTTATTTGGTTTTAATATCGATTAATTTTTTATTTTTAAAATGAAAAGAAAGCCATG  
ATTTCTTCTGCTATA**GAAT**CATGAAAAGACGCCCTTTTTTATTTAATGAAAAGCTTTGT**ATCC**TTAG  
TAAATAGAGAACCTATAGAC**GGGT**GCATTAATATTTTCGTCTAC**GAGT**TCCTGAGGGAAA**ACTC**CAAAGG  
**GATGGGT**CGCAGAGACGGAGGCGCAAAGCTAG**GAGT**CTCTTAAATGCGTTTCGTTTGGAGGGAGCTCTCC  
ATAG**ACTC**TAAAGTCGGTAGATGTTGATGCGCAGCTCGTAAGTAATGCGAG**ATCC**TAGAAAGGTTTTT**GG**  
**ATCGAAT**GCCATGGAGATATTGTGAGGCAGAA**ACTC**CTA**ATCC**TAAGAAAGGCTTAGCTGTCCAGTAGTA  
GGTATTGTGTTTAGAAGCCGCTTGGTTTTTTGCATAGGAAGCAAGTTCATAGC**GAGT**AA**ATCC**TT**GATTC**  
TCTAGCAGCTCTTCGGCTGCTAGTGCCATCTCAGCTAGG**GAGT**CGTCATCTGCTAT**GGAT**GGAA**GAAT**AC  
GTTTACGGTGTGTTGTAAGGAGGAGGTGTA**GGGT**CTATAGTTAGATTATAAATAGAGATGTGTT**GGAT**TGG  
GAGAGAAATAGCTTGGCGAAGATCAACAATAAATCACTAATCGACTGTGTAGGGAGGCCATAAATAAGG  
TCTGCAGACACATTAGAAA**ATCC**GTATTGGGAGCAGAGCATAAAGGCTTCAATCGCTTTAGATGAA**GAGT**

GTGTGCGTCCTAGTAGCTTAAGTAGGGGATCATTGAATGTTTGTACGCCAATGCTAATGCGATTGATCGA  
GGTCAAGGCGAGAGCCTGGATATACTCAGAGAAAAGATTTTCAGGGTTTGCTTCAAAGAGTGATTCTGTG  
GCATGCTGAGCTTCTAGAGCTACGAGAATATCTTGAATCAAAGCAGGGGGAACATAAGAAGGAGTCCCTC  
CTCCAAAAGAACTACTGTATCAATATAGTGAGAACAACGTAGAGGGGCTAGTTTTTTTAGCCCTCTTTAAT  
GACAGCTTACAATAAGAGCGCATTAACTCTTCTTTATACGGATCGTATAGAACTACAATAATGACAT  
TTCTTCGAGCAGAAAAGGGATATGTATGTAAAGAGCTAAGGGAGTCTTACCATTCATTCGCGTCAAGGATCT  
ATGATGCCTCCTCGGCGCCAACGATTGCGATCGCTGAAAAGGATCCATCATCGTCTTACTAGAGTAGTCGA  
GTTTCGTTTTCCGCTTCTTCTTCTGCTCATCACCTAGGTCAATCTCAATTGTGTACCCGGCATCGAGATC  
CACTTCTGTATCCGAGGATTCACAAACTCAACGTCTGAAACGCTGGGGCCATCTGGGTAAATGGTTTTA  
GCTGGAGTCTTTCGAGGGTTACGTACTCTTTGATCTCACCGCTTCTTTGAGAAGTTGTAGACGTTCTT  
TCTCTTCAAAGGATTTTGTCTTCTAGCAGACGGATTTCTTCTGTTGTCTCTCGATTTCTTTTTTAGGAAC  
AAGGCCAAGTTGCATCCACTGGGTAAAGATCATGAAGCTCTGATTCATTTTTTTTTAAACGCTCACTTTTT  
ATTCGTAATAGTCTGTTCTATGATTGAAACCGGAAACCCCTGAGAGCCAATTTACTTGTCTCCTACC  
AAGGGTAACTGCATCTTTTGCTCAGATAGAGCAAAAAGTGAGCAGGCATAAAACAAATAGATCAGGAGAGA  
TTTTGGCTAGTAAAAACTCATTCCAAAGTATTTGTTCAACTGATAAGCCAAGCTCTGCTAGCTCTTGTA  
AGAAGTCAGGAGGCTAGGGTATTCGATACTTAAAAAAAAGCAAAGTTTGCTTTTTTTGAAAAATAAAAA  
TTTTGATATGGGAATTTTCTAAAAGTATCACCTTCAATCGATAGATTCGTCTTATGGATTCAGACTTTGC  
TAGGCATGTGCATTCATCAGATATTGACTGGATGAATCTTTGTTTCGAGCGATTTGAGAAGCATGAGCCG  
ATGGATTCATTCATGGAATATTTCTTTGAAGGTTATCAAGTTGGGAAGACGGAGGGGAGCCCAACAAGAA  
CTTCTCATGATCAATTCCTTACGTCTTTGCAAGAGAAAAAGCACACAGTCTTTTGATGATATACCGTTA  
TTACGGCTATTTACAGGGCAAGTGTCTCCAATATCCATCATCAGAAAGAACTTCTCTAGTTACAGAAAAG  
GTTTCGTAATTTTCGATCCCAAGAAGAGATTCCTTCTTTAGGATATTACCAGCAATCTTATGTTTCGTATAG  
CAGACTTTATTCAGTATTTAAAAGAGAAGTATTGTTCGAGCATCTCTGTTGAGACATTGAATGCTCTCC  
TGAGATCCAAGAATATGTCTGGAAACTCATGGAAGGAGAGAAGCCCTCTTTAACTAAAGAAGTTCTTCTG  
GCGCGATATCGAGACGTAAAAGAGCAGTAGCTTTTGAAAGAAATTTTACAGGTTAAATTCACAGGAAAA  
AGCGCTTTTTCTCTAGAAGGTGGAGAGAGCTTGGTTCCCATGTTGGAGCATCTCATTTGCTTGTGGGGTAA  
GCAAGGCATCAATCGTTACGTGATGGGAATGCCCTCATCGAGGCCGATTAACGTTCTTGCTAACATTTTTT  
GGAAAGCCTTACCGGCAGATTTTCATGGAGTTTGAAGACGCTCCCCAAATAAGAGGGCTGGAAACTGTTG  
GTGATGTAAAGTACCACAAGGGATATGTTGCCAATAGGCCGGAACAGAACGTTATGATGGCTTTATTGCC  
GAATCCGAGCCATTTAGAGTCCGTGGATCCGTGTTGTGGAAGGTGCTGTAGCAGCGATTC AACATCAGGGA  
GAGGCTGGGAAGGAGCAAGCCTGCTTAGCTGTGTTGATGCATGGAGATGCAGCCTTGGCGGGT CAGGGCG  
TTGTATATGAAACTTTCCAGTTGAGTGGGATACCAGGTTATTC AACAGAAGGAACGTGTCATATTGTAGT  
GAATAATCAGATAGTTTCACTGCGCAGCCTCGAGAGTCTCGTCTACTCCTTATTGTACAGATATAGCT  
AAAATGATGGGATCCCTGTATTCGAGTGAATGGAGAGGATGTTTTAGCCTGTCTCCAGGTCATGGAGT  
ATGCTATACATATCCGTGAGCGTTTTCATTGTGATGTGATTATCGACCTCTGTTGTTATCGAAAAACGG  
TCACAATGAAAGTGACGATCCCTTCTGTTACAGCTCCATTTTTATACGAAGAGATCAAAAAGAAAAACAA  
GGGT CAGAATATTC AAAGAGATCC TTTTACACCATCCGAATGGAACATTTCTTCCAACGAGT TGGAGA  
GAATAGACACAGAGATAGCGCATGTTTTAAACCAGGAGTACGCTTCTCTGAAAGATCCAGGTGTCAACG  
GCTAGATGAATGTATGCATTGC ACTC GTATGGCAGCTGGAGAGCTTCTTGTGATAAATGTGGATACATCG  
TTAGACAAAGAAGCCTTGTGTTGATCTGAGTGCCAACTTTGTGATATTCCTGAGCATTTTTCTCCTCATG  
CAAAGATTCGATCTTTATTAATAAGCGTATGAGCATGGCTGATGGAGAGATCGGTTATGATTGGGGAAT  
GGCTGAAGAGGTGGCGTTCGCTTCTTATTACAAGAAGTTTTTTCATTACGTTTGTGTCAGGACAAGATTCCT  
ATTCGTGGAACCTTTCAGTCAACGACAGTTAGTCTGGACGGATGTCCAGACAGGGGATACATTCCTCCAT  
TATATCACTTGTCTCCGAGTCAAGGCAGCGTGGAATATAACAATTC CCCTCTATCTGAATACGCTGTTTT  
AGGCTTTGAATATGGTTATGCACAACAAGCAGAAAAGACTCTTGTATTGTTGGGAAGCGCAGTTTGGAGAC  
TTTTCCAATGGAGCCCAATCATTTTTGACCAATATATTTCTTCCGGAATTCAGAAATGGGATTTACATT  
CCGATGTAGTTGTACTGCTTCCCTCATGGCTATGAGGGGCAAGGACCTGAGCATTCCTCGGCTCGTATAGA  
GCGTTATTTACAGCTCGCTTCCGATTGGAATTTTCAAGTTGTTCTTCTTCTACTCCGTACAGTATTTT  
CGTATTCGCGGGAGCATAACGAAGAGAGACCTCTCTTCTTCTTATCATTTTTTCTCCTAAGATGTTAT  
TGCGGCATCCGCAGTGCCTGAGTCTATCGCAGAGTTTGGAAATGAAGGGAGGCTTCAAGCCTTCTTGGGA  
AGACGAGAATCCTAACATCATGCAAAAGTTCTTGTCTTTGTAGTGGCAAGATTTATTACGACTATCGT  
GCTTCTTCTCCTAAAAGATCTTGAATGTCGTTTTGCTTGTATACGAGTAGAGAGTTTGTATCCATTATACT  
TAGAAGATCTATTGGTCTGATAAGCAAATATACGGAAGTTCACCATTATGTATGGTTGCAAGAAGAACC

TCAAAATATGGGCGCTTTTAGTTATTTTGCATTAGCAACTGACGAGATTTTCCCTAGCAAATTGCAGTGC  
GTTTGCCGTCCTAGGAGTAGTTCAACGGCAACAAGGATCTGCAGGTTTAAGTCAAAAAAAGGATATCGATGT  
TAATGGAAACCCGTGTTTTCTATAGGTAGAGAGTATAGAGGTTTCGTAATCCCAATATCGC  
AGGATCTATTAGTGAAGTGACGATTTCTGCACCTTTGATTCATCAGGAGATTTGGTGCAGGAAGGATCAA  
GGGATTCGGAGATAGAGAGTGAACAAGGTAAGTCAAGTCAATTTACGCTCCTTGCTCAGGAAAGGATAGAGT  
GGAGCGTTTCCGTAGGAGTACGGTCGCTGTTGGTAGTGTGTAGGATATTAGTGAAGCGGAAAAAGG  
TCAAGATACCGCACCTATCCATGAGCAGATGCCATTTAGTCTTGTAGAGCAGGAAAGCGATGCGCAGATT  
ATTGCCTTCCCTTCATCAGTGAGACAAGGATCCCTCCTGCAGAAGGGAAAACTTTTGTTCATTAAAGGAGA  
TCCAACCCAGCTTCTCTGATCATAGAGGATCTCGAAGGATCTATGAGTGTATTCGGAAGACGATTTCTCG  
TAGATTGGTGAATCTCTACATGATTCAGCAATGTTAACGACATTTAATGAAATCCATATGGGGCCGCTT  
ATTGCTCTGCGTAAAGGAAAGACAAGAAGATTTGCTTGCAGATATGGGGTAAAACTGGGGTTCATGTCTT  
TCTTTGTTAGAGCCGTTGTAGATTCCTTTGAAAAAATATCCCTCGGGTGAATGCTTATATTGAAGATAACGA  
AATCGTTTACAGACATTACTACGATATTTCCATTGCCATAGGGACAGATCGTGGATTAGTAGTTCCTGTA  
ATTCGTAATTGTGATCAGTTATCTAGCGGGGAGATTGAGTTACAGCTTGCCGATTTAGCTTCTCGTGCTC  
GGGAAGGCAAACCTTGCTATTCATGAGTTAGAAGGGGGAGGCTTCACTATTACCAATGGAGGGGTATATGG  
TTCTCTTCTATCCACTCCATTATCAATCCCTCCACAGGTAGGTATTCCTGGGATGCACAAGATAGAGAAA  
CGCCCTGTGGTTAGAGAAGATGCAATTTGTGATAGCCGATATGATGTATGTAGCTATGAGCTATGATCATC  
GGATATAGACGGAAAGGAAGCCGTAGGATTCCTTGTGAATGTTAAAGAGCAATTAGAACAACCCGAGCT  
TTTGCTAAAAATGTAGAAGCGTCAGAGAGAGGCTGCATTACTCGTTATCTAGGAAGAAGAAGAACTGCAG  
TGACATTATTTTTTCGAGAAGGATCGCTGACAGGATCCCTGCTGGTGGCGAGATTTCCAGCTTCTGAACGA  
GAAAAAGGTATTAGATTCAGAACAAGTGCAGCGTCTGAGATGAAAATATGATTACTGGATAGTCCTTCG  
GAGAGCAGTTGTTTTCTTGTACTGCTCGGAAATCGAGGTGATTTCTTTTAGGCATTAAGGGAAAAAAC  
TAGAAGGGAACAGTCTCTTATAATCTGGATAGACAGCCATATCAGGACCTAGAGAGGGAGATATAGCCAC  
GATAAGATCTTGAGGACGAGTGTGAATGTCTTTTTTCAGCAGGCCGAACAGTGACAGCATAGATATTGCC  
ACAAGACCTCTCCATCCCTGCGTGTACATTAGCAATCACATGGTTTTCTGGGTATAGAAAATGGCTGCTT  
GGCAATCTGCATGGTAAATGTGTAGGGAGAGAAGAGGAGTCTGTTGTGAATAACCCATCGGCAGGCGCTCT  
CTTGGGAGTTTTAGGGGTGACATAACGTACGCTCGTTCCATGCACCTGACGAGCGTTACAAAAATCGTTG  
CCTCCTAAGGAAGAGGAAATGACCTCATCAGAACTTGACTCGCTTCTTCTTATCATCTTGTTTTGGGA  
AAATACCATGGGGAATAGGAAGGTATTCCTAAGTCAAGTGTCTGTTTACGTAAAGCTTCGGAAGGGAG  
TGTCATCAGGGATCCATTCCTGCTCTTTCCATACGCCATGTTCTTTTAAACAATGGACCAATTCCTTCT  
CAGCATTTTCTATGGGAATGCATGATTTTACACATTTATGTTTACGATATAGGTCAATCATACCTGGTTT  
TGATCCCTACGTAGCCAAAATCGGCGTCAGCCATTTCTCCTGGGCCATTGACGATACATCCCATCACAGCA  
ATTTTAAACCTCCTGGAAGATGTTCTGTTCTTTTACGAATGCGTTGAGAACTGCGAGAAGGTGAGGATCTAAAG  
GCGTTCGGCCACATCCAGGGCAAGAGACATATCCACTGTTACGGACCAGGATATTAGCACTTTGTAATAA  
CAAAAAACCCAGAGTCTTAGAGAGTTTAATATCTACAAAATCTAGTAGTACGCAAGATCCCTAACCCGTCT  
AGAAGTAAAGCTCCCAACCGAGCAGACAAGTCGATAAATGGCTTCATTTTTAGAAAGGTGAGGATCTAAAG  
AAAAGCTTAAACACACAGGTTGTGTAAGTGTGTCGAGAGAAAAAAGCGACGAGCAGTATGGATATC  
GGTACTTCAAAATAGACAAATGGAGCAGAAAAGGATCTCTTACAGAGAGCCATTCCTCCTCATTCGGA  
TTAAAGGATAGGAGCATCTTCTTTATTAAGACAAGAAGATGCTTCTCTATTTACAGAAACGATAGGAGAGG  
AGCGCATAGCTTTGGGGACAACGACTCTTCCGGGGTGTAGGATCTATTTTCCCTGTGGTTGTGTCAAT  
GCCTAAGCACTGAAGAAGTCTATAGGCTCTGCCGTGAGTGTACATCGGTTAAGTTAATTAACAGT  
CCATAGACATTGTCCAAGGAGGGGATTCAAAGTGTTCGAGTACCCAGTTGTTTTGAAAGGATGGATGG  
CAAAATGGATTGTGCGCTTCTCCCATCTTTCCGAGAGTCTGTGTCTGTTTGGAGAAGATCGATACAAAT  
AGGGATCTCATTGATGGGGCTACCGGTTAGAGAGCAGCGGATGGTATCACCCAAATCCCTCTGAAAGAAGC  
GTACCTATTCCTACTGCAGATTTTACAATGCCTGCAGTGCCAGATCCCTGCTTCTGTAATCTAAGTGCA  
GAGGATAAGACCATTCCTGTTGGTCTAGCTCATAAGCTAAAGATCGATACGCTGCCACCATAACTTTTGG  
ATTACTGGATTTTCATTGAGAAGATGACATCATGATAGTCCATAGCGACACAGACTTCGGCATATTCCTCAAT  
GCAGAGTACACCATGCCTTCAATCGTATTTCCATAACGTTGCGTTACGCTTCTGATAAGGAGCCGTGGT  
TAACGCCTATGCGCATAGCTTTGCCTAAGCGTTTGCATTTTTTCCACAAGTGGAGAGAAGCTTGTTCATCAA  
ATGCTCTAAGCTATGCGCGTATTGCTCATCAGAGTAAATTTTTCCAGTAAACATATTACGCTTATCTACA  
TAGTTTTCTGGATGATACGCACTTTATCTACACAATCCACAACATGTATGGCTGCCCTGAGGAAAGAAAT  
GGATATCTGCTACAAGAGGGATGGAAATGTTCTGTTGAATCAAGCGGTCTTTAATGTGCTCGCATGCATG  
AACCTCTCGAAAACCTTGTACCGTAACACGAACGATGTCGCAACCCACTCTTGCAGAGCACAAATTTGT

CTAACCGTTCCATCCACATCTGTGGTGGCTGTAGTCGTCATAGATTGGATTTTGATGGAGTGCTCACTAC  
CAACAAAAGATCTCCGATTCCTACTGGGAGGGT TTTGCGTCGAAACGCATTTTGTATACAGGGT GTTGC  
CATGACGAGGTGTCTACAAACAATTTTTGAAATGGCTGGGACAGTACCGCCGAATCTCTTCTCCTG  
AAGGTTTTGGGGGCTGAGGAAGTATAAGCTTTAGATCAATTTAAAGGAAGGTCTCCATGGAGAACCTC  
CCTTTAAAATTTGTTATAAATTCACGGGT TGAGGGAT GTTCGTTAAAACAATCACTAGATCTTTGGATG  
CGTGTTTTTTCGCGGTTTTTTCTACGGCATGGAGT AAGGCTAGTTTAGCAGACTCGATCCATTTTGGCCG  
TTTGCTTAGCGCTCTTGAACAAAATCTCCGAAAGAAGCGATTTAAAGGAATTTGGATCATACGACAACCA  
CAACGAATAGCCTCTTCGAAACAAGCTGTGTAAGCTCGTAAGGTTATCTCATAGCAAGATTTAGACATAG  
AAGCTTTAGGAGCTAGCATTGGATGAACAATAGAGGCTTGTATAGGTCTTTGTTTCCTCATCCAGCA  
AGGCCTAGATGATTTTTGTCTTCCAGGTGGCAGAAGAGCATTC TCCTGGAAGTAGGATCCCTGACTCG  
GGT TTCGATTC TCCAGCACTTGTTCGGTAAGCACAGCAGGGAATGCATCGTTCCTCCTAATCC TCCTT  
GGCTCTCTTTCGGAAGGCTGCCGATTTGTGTGGCATTGCAATCGCAGCAGGTAGATTCGATTGCATTC  
CAAAGAAGAAAATTTGGCCTGAAGTAGAGACAAAAATAGTATGAGT GAAAGGAATATTC CAGGCTCTAAAT  
CTTGCTGAAAGGGT TCTGAAGAACAGAGGCGTTTTGTTCATTAGCAAGGAAAAACGGCATCTGTCTTATCG  
ATTC TATGCAGTTCATCCAAAAAGCATTTACCGATCGTTCTTCTCAGTGGTTTTGGAGGTATGAAATC  
TGGAGGAGGAGGAGCTATAGGTTTAGGTCTTTTGTATTCAGGCAGCTCGGGAGT AGGTT CAGCAGGGAGT  
TCGGTAGAAGGTCTTCGGGACACAATTTTTGGGGGACAAACATATCGACAGAGAAATAGTCTGAAGCAA  
AAAGACTGACACCTAAAATAACAGCAGAAACGGCGATTAGGGCAGGAAGGGAGGCTAAAACGCCAACCAC  
GCAACCAGCAAGTCTAAAATGATTC CAGACGCAAGAGAAGTAATGAGAGCGCGTCTAGGAGT CAAAACA  
GGAGTTGACAAGAAGGACGTATAGCATTC TGTATCGCGGACAGCGATGTAAACATAAATCTCTTAAC TTT  
TAAAATTTTTGCCAAGGGCTTAGGACAACACACCGTTTTTGCCAA GAATGCAAGTGTCCGGAGGCTAGA  
AAGTTATCTTAACGCAGCCACCTTTAATGCAGCATTGACAAGCCAAGCGTTCATTA GAATCTTCAGGATC  
ACCTAAAAAATCATACTCAGCCTCAGAAAAGTCAGATAGGTTATCCGCGCTTCCAAGACCTCAATCAGC  
CAAGTCCACAAAATCTCTTCATACAAGCGAAAGGCAGCCAGAAT GTTCGCAAACCTCTGCTATAGAGG  
AACCGTCTTCTAAATGAAACTCTTGATTC TCGTCATCTGCTGAAATGATGAGCTTAGCCATAGGACTCCA  
GAAGGAAAAAGAAAAGATTAGTTAAGAATCGGAGTAGAGGGATTC GAACCC CCGACCTATTGCTCCCAA  
GCAACC GCGCTAACCGAGGCTGCGCTATACTC CGATTTAAAAAAGTAGGAGCTAAGGAAGTTAGCATATTG  
CCTATATACTAGACAAGGGAAAGATACTATAAATGCAAATATTC TTCGAACTTCTTCTGAGATATAT  
GTTTTTGCTGGGTATTC GTTCGGTGTGAATCGGGT GGCTGTTGT GAATAACTTTAGAGGAAGTTCATGG  
AAAATTGTAGCAATCC CCAGTTGTATACTGTTTACTTTGATATTC CATTTGCC TAGATGGCTGATTGATT  
TTGGGTATGTACAAATTTAGCGTCTCCTTGTGATCATTTTTTGGGTGTTTTCTTTACGCTCTTCAGC  
TTCGGCTCGTATTTCCCTTCGCTCCTTTTGTATCTTTGTCTATTGCGACTTGGCCTGAATTTAGCCTCC  
ACCCGATGGATTTTATCTTCTGGATGGGCTTCTCCTTTAATTTTTGCGTTAGGGAATTTCTTTCCCTTG  
GGAGCATCCCGGTTGCTCTTACGGTATGTTTACTC CTGTTTTTAGTGAATTTTCTCGTCATAACTAAAGG  
AGCGGAGCGTATTGCGGAAGTGCAGCTCGTTTTTCATTAGAAGCGCTCCAGGTAACAAATGTCTTTA  
GATGCTGATATTGCTGCTGGAAAGGATCGGGTATAGCAGAGCGTCTGTTAAAAAAGCTCTCTTTAGAAG  
AGAGTGATTATTTCTCCGCCATGGAGGGCGTATTC CGCTTTGTAAGGCGATGCGATAATGAGTTGGGT  
GTTGTTAGGAGTGAATATCC TAGCTGCTCTATTTTTAGGACGAGCTACTCATGTTGGCGATTTGTGGTTA  
ACTGTATTAGGCGATGCTTTAGT GAGTCAAATTC CAGCATTGCTTACATCGTGTGCAGCAGCAACGCTTA  
TAGCTAAAGTTGGGGAAAAGAAAGTCTAGCGCAGCATCTGCTAGATTATTATGAGCAGAGTCGCCAGAG  
TTTTCTTTTTATCGCTTTGATCC TATGTGGGATGGCTTGTATTC CAGGAGCTCCTAAAGCTCTGATCC TA  
GGTTTTTCAGTTTTATTATTCCTTA GGGTATAAGAATCC TTCTTCAGGAGAGACTC TTCTCTCCAGAAAG  
AACGGGTAGAGT TTGTATTGCCTGATGAGGGAGT GGGAAATCC TGCTAATTTGTACAAGGACGCCCGCAA  
TCAGATTTATCAA GAGT TAGGCGTAGTTTTCCCGAAGCTATTGTTGTACGTTATGTAACAGGATCTTCT  
CCACGTTTAAATCTTTCTGGGCAAGAGGTCGCTTTGAGAGAGCTGTCTTGCCAGCTATACTAGAATCGA  
TTAGGCAGCTAGCTCCAGAAACGATCAGTGAACGCTTCGTTGCTCACTTAGTTGATGAGTTTCGAGAGCA  
TGCATTC TTATCGATAGAAGAGATCC TTCCGTTAAAATATCAGA GAATTC TTTGATTTCTTATGAGA  
GCTCTTGTAGAGAAC GAGTGTCTTTGCATTTATTC CCTAAGATTC TCGAAGCTATAGATGTATATGGCT  
CTCAATCAAAGAATTC TCAGGAAT TGGTA GAGTGTGTACGAAAATATCTTGGGAAGCAAATTTGGTTTATC  
CTTATGGAATCGCCAAGATGTCTTAGAGGTAATTACGATAGACTC TCTGGTTGAGCAGTTTGTGAGAGAT  
TCACAAGAAAAGGTTGTGTTGGAT TTAATGAAAAGTAGTTGCTCAGGTGAAGCATTTATTGCGGGTAG  
GGGAGGGGAAT TTTTCGAGCTATCGTAACGGGATCC GAAACAAGAAAAGAACTGAAACGCATAGTGGATCC  
TTATTTCCAGATTTATTGGTTTTTAGCACATAGCGAACTTCCAGAAGAGATCC CTATAACTTTGTTAGGA



CGGGTGTCTGATGAGGTTTTATTATCATAAAA**GAGT**TATTGATTAG**GAGT**TATGTGTTAGTTGTGTAAG**G**  
**G**TAGATATTGTTTAAAAATTTTATTTGATTTAGCCTTATTTTTTAGTTTGTAAAAGAAATTTTTTTTGTG  
AAG**ACTC**ACGATCTCGCAGATACTTGGCAGCTATATTGGTCGACAAAAGAA**ATCC**ATCATAG**GGAT**GTTT  
TGATC**GAATCC**TACCTTCCTTTAGTAAA**GAAT**GTAGCGCATCGGCTTGCTTCAG**GAAT**GCCTTCTCATGT  
AAAGATGGAAGATCTTTATGCTCTGG**GGGT**TGAA**GGGT**TG**ATTC**GTGCTGTGCAACGTTTTT**ATCC**AGAA  
AAAAGCAAGCG**ATTC**GAGAGCTATGCTCTTTTTATCATAAAAGCTGCGATTATTGAT**GGAT**TGCGCAAAC  
**AGGAT**T**GGGT**ACCACGCAGTGTTTATCAAAGAGCCAATCGATTAGCTGATGCGAT**GGATTC**TTTGAGACA  
GACTTTAGGTAAAGAACCTACTGATGGAGAACTTTGT**GAGT**ATCTAAATATTTACAACAA**GAGT**T**ATCC**  
CATTGGTTTTCTCTCTAGACCTGCTCTAGTTCTTTCTTTAAATGATGATTTCTCTGCCAAGATGACG  
ATGAGGGGCTTGCTTTAGAAGAGCGCATAGCAGATGAGCGAGCGGAAACC**GGAT**ACGATGTCATCAGAAA  
AAAAGAAGCTATTTCTATTTTGACAGAAGCTTTGCTGGCTCTTGATGAAAAAGAGCGGCAGGTTATGGCT  
CTTTATTACTATGATGACTTGGTATTTAAAGAAATGGGAAGATTTTAG**GAGT**GAGC**GAGT**CCC**GAGT**TT  
CTCAGATAC**ACTC**CAAAGCTTTATGAAGTTACGAGGTACATTGTCCAGTCTGCTTTAGTAACTGTCTCC  
AGAAG**ATCC**TCTCTGTATTTTTCTATCAAT**ATTC**TATTAGAGAAGCGCGTCGTTTTTTTTGACGAGGTGT  
CTGCTATCGCTTGCTTTGCTATAAAAAGAAC**AGGAT**AGATAAGATGTTGCTAGATAAGTTTATAT**GGATA**  
GATTTTTATGCAACAGTTAATCGATAACCTTAAGAAACG**GGGTATTC**TAGATA**ATTC**TTCCGCAG**GGATTA**  
GAAAGTTTAAACAGTTCCTGTTTTCTGCCATTTA**GGGT**TCGATCCAACTGCGCTTCTTTACACATAGGAC  
ATT**GGAT**T**GGAAAT**TTGTTTTTTGCGTCGATTAGCAGCATATG**GAAT****ACTC**CTGTTGCTCTTGTGGCGG  
AGCTACCG**GAAT**GATCGGAG**ATCC**TTCTGGTAAAAGTGTGGAGCGTTCATTACTAGATCAGGCACAGGTG  
CTTGATAATAGTAAAGAAATAGCGGCTGCTCTTGCTAGCTATCTTCTGGT**ATCC**GTTATTGT**GAAT**AATG  
**CGGAT**TGGCTAG**GGAT**CTTTAAGTATGGT**GGAT**TTTTTAAGAGATGTTGGGAAGCATTTCCGTTTAGGTTCT  
TATGTTAGCTAAAGACGTAGTGAAGCAGC**GAGT**CT**ATTC**TGAAGAGG**GAAT**TAGCTACACT**GAGT**TCAGT  
TATTTATTGCTGCAGTCTTATGATTTTGCACATCTCTTTAAAGAGCATAATGTTGTATTACAGTGTGGAG  
**GGAGT**GATCAGTGGGG**GAAT**ATTACTTCGGGG**AT**TGATTAT**ATCC**GTGCAAGAGGACTAGGGCAGGCTTA  
TGGTCTAACCT**ATCC**TTTGCTCACTGATAGCAAAGGGAAGAAAATAGGGAAGACG**GAGT**CTGGAACATC  
TGGCT**GGATCC**AGCGTTAA**ACTC**CTCCTTATGAACT**ATTC**CAATATTTCTACGCTTGCCAGATCAAGAAA  
TCTCCAAAGTAATGAGA**ACTC**TT**ACTC**TTTT**GGAT**AACGAAGAAATTTTTGCTCTTGATGAGCGTTTGAC  
TAGTG**ATCC**CACAAGCTGTGAAGAAATACATTGCGGAAGTATCGTTAAAGATGTTTATGGTTCTGA**GGAA**  
**TTAGCT**CAGGCTCAAGCCGCAACCGAAAGCTTTTTTGGCTAGTAAGGGAAG**GAGT**ATTACAGAAGCAGAAC  
TAGTAGCGTTAGTAG**GAGT**CAGGTGTTGGCGTTAAAGTAGCTCGAGCAGATTTAATAGGGAAACGCTGGTT  
AGATATCGTTGTGGAACTAGGCTTTTGTTCCTCAAGAGGACAAGCTAGAAG**ACTCATTC**AACAGCGAGGT  
CTGTACATCAATCAGGAGCCTTTGGCCGATGAACA**GAGT**ATATTAGACGGG**ACTC**AGTTGTGTTTCGATC  
GTTATGTTTTGTGTCCTCAAGGGAAAAGAAAAACAAGTATAGATCTTAATTAGGAG**GGGT**CTGTGGC  
TCCAAATACAGATATT**GGGT**TGATTGGTTTTGGCCGTGATGGGCAAAAACCTTGATTGAACATGGT**GGAT**  
CATGTTTTTTCTGTTCTGTCTATAACCGAAGTCCGGCGAAAACAGAA**GAGT**TCTTGAAAGATCATGGAG  
**AGAGT**GGAGCTCTGCA**GGAT**TTACTACG**ATTC**AA**GAGT**TTGTTCAATCTTTGAAGCGTCTCGTAAGAT  
CATGATCATGATTAAGCGGGAGCTCCTGTTGATGAAATGATTGCCCTCCCTGCTTCTTCTTGGAAAGAG  
GGAGAT**ATTC**TCATTGATGGGG**GAAT**AGCTATTATTTAG**ATTC**TGAGCGACGCTATGTCGACCTGAAAA  
AAGAAG**GAATTC**TATTTGTTG**GGAT**GG**GAGT**CTCTGGAGGGGAAGAGGGGGCTAGAAAAGGGCTTCCAT  
TATGCCCGGAGG**GAAT**ATAGATGCTTGGCCTGCAATCGTCTCTATCTTT**CAATCC**ATAGCTGCTCAGGT**G**  
**GGT**GGACG**ACCC**TGTTGCTCTT**GGAT**TGGCACAGGAGGTGCAGGGCATTTTGTTAAGGCTGTTCAATG  
**GGAT**C**GAAT**ACGG**GGATATCC**AGTTAATTTGTGAAACATATGAG**ATTC**TTAAG**ACTC**GACTTAATCTCTC  
TTTAGAGCAGATAGG**GAAT**ATCTTTTTT**GAAT****GAAT**CAAACCGATCT**GAAT**AGCTACCTCCTTGAGCA  
GCAGCGCCGTTTTAATAGCAAAAGATG**GAAT**GGCAATGCGATTGCTTCTACG**ATTC**TTGATGTTGCTG  
GACAGAAGGGGACTGGGCGTT**GGGT**CGCAGAGGACGCTATTAAGGCAGGCGTTCCATGTCCCTAATTAT  
T**GAAT**CGGTCTTAGCTCGATACCTTTCGACTTGAAAGAAGTGCGCACAAAGGCAGCTCAA**GAGT**TTCCA  
**GGGATTC**CTCTTCTGTCAACCTCCACAAGAAGCTTCTGCCTTCATTG**AGGAT**GTGCGAGAGGCTTTGT  
ATGCAGCTAAGATTATCAGTTACGCTCAA**GGAT**TTATGCTGCTGAAGCAGGTCTCTCAAGATAAA**GGAT****G**  
**GGAT**CT**GAAT**TTAGGT**GAGT**TAGCTTTGATATGGCGTGG**GGGT**TGCATTATACAAAGTGCCTTTTTAGAT  
AAA**ATTC**ATCAAGGTTTTGAAAATAGTCCAGAAGCAC**ACTC**TTTGATATTACAAGATTATTTAAAAAGG  
TTCTGTTTT**ATTC**AGAAACAGGTTTCCGGCGAGCTGTTTTGCATGCTAT**CGGAT**CTGGTGTAGCT**ATTC**  
TTGCTTATCTTCTGCACTATCTTTTTATGAT**GGAT**ATCGTACGGT**GGATTC**ACCTTT**ATTC**TTAGTGCAA  
**GGAT**TAAGAGATTACTTTGGAGCTCATGGTTATGAGCGTCGAGACTGTCTCGAGGG**GAGT**TTTTATCATA

CGGAT TGGCTAGAAACCAAGAAAAC TTTTAGAGCATAAAACAAGAAGGCCAGTAACTACT GGGTCTTT  
TTTTATGAAGCAATATAGCTAGAAGTAGTCT ACTC CATT TTAAGGACTTCAACAAACGCCGTGTTCCG GAAT  
GGATAC TTTTCC GAATTC TTTTCA TTC GTTTCTTCCCTTTTTTTCTGTTTGTCCCACAACTTGCCTTTTCTT  
GTGATATCTCCACCATAGCACTTAGCAGTTACATTTTTTCGCTAAAGCTC GAAT CGTCTCTCTGGCAATAA  
TCTTTTTATTGATGGCCGCT GAATAG GGATTTTAAAAAGCTGAGGAG GGATAACATCTAC GAGT TTTCTC  
GCAGATGCTTCTGCC TTTTGATTC TGCTTTGTCTGTGTACAAGGCAGGAAAAGGCATCAACAGCCTCA  
TCATTAATTAGAAT TTCCAGCTTAATGATAGC ACCC TTTTTATAATCTCCTAACCGTAATCAAAGGAGC  
CGTATCC TTTTCGTCACAGATTT GAGT TTATCATTGAAATCAGAAAATCTCATTGAGAGGCAGCTCATA  
TGAAAGCACCAGTCTGTGTTGGTCAAGCATATCTGTTTTTAGACAG ATCC CACGCTT ATCC ATACAAAGG  
CTCATAATATTGCTGAGAT ACTC TTGAGGCGTAATGATATTAACATGG ACCC AAGGCTCCTCCATGTGTT  
CAATAAGAGCT GGGT CAGGAT ATGCTGTT GGGT TATCAATAAAAA GGGT TTTTGCCATTTTTTAAGACGAC  
TTTTGTAGATAACGCTAGGAGCTGTAGCAATAATATCGAGATCAAATTC TCTAGAG ATTC TCTCAAAGATG  
ATTTCTAAGTGCAGCAGTCTAAAA ATCC ACAGCGGA ACCC AAAATCC GAGAGAGT GACTGCTCTCTTGT  
CAATCGTAAGAGCT GAGT CGTTTAGCTGCAACCGGCCTAGAGCATCTTTCAGGGT ATCAAAGTCAGAA GA  
ATCTATAGGAT AGATAACCAGCAAACACTACAGGTTGATTTCTTTAAAGCCTTCTAAAGGCTCTTTAGCA  
GGAT GTTTAACAGTAGTACTGTATCGCCAATTTTTAC ATCC TTTACTTTTTTTAGGTTGGCAATGAAGT  
ATCC CACTTGTCCGGCTCGTAA GGATCC TTCCATGAGAGTAGCTTCCGGTAAGAAAGCTCCT ATTC CTA  
GACCTCAAAGAGGAGCCTTTGGTTGCCATGAAGTAATGCGATCTCCCTTTTTGATTTCTCCACTGATC  
ACGCGTACATAAAACCATG ATTC CTACATAAAGGAT CGTAGTGAGAAT CAAAGATCAAAGCTTTAAGTTCTG  
TTTCCCTGTGGAGGTTTGGTGGGGAAAC GAGT CGTATAATAGACTC TAAAATTT CAG GGAT ACCTGACC  
TGTTTTCGCTGAGCAAGCAATGGTGT TGAAGTATCTA ATCC GATGA ACTC TTCGATTTGTTTTTTATA  
GCTTCTGGTTGAGCAGCAGGTAAGTCTATTTTATTTAAAACAG GAAT GATTTCTAAATCTCGTTCTAGAG  
CCAGATATACATTAGCTAAGCTTTGAGCTTGAACACCTTGGGCAGCATCTACTATAAGCAGCGCTCCTTC  
ACAAGCTGCTAGTGATCG GGAT ACTTCATAAGAGAAATCTACGTGTCCAGGGGT ATCTATTAGATT GAGT  
TCGTAAGTCTCCCTTCGT ATTC ATAGGTCATAGTGACC GGAT GCGCTTTGATGGTA ATCC CGCGTTCTC  
TTTCTAG ATCC ATAGAAT CTAAAAGTTGTTTCGCGCATCTCTCTTTGTTTCGATAGTACTAGTACTTTCTAA  
CAAACGATCTGCGATCGTAGATTTCCCGTGGTCGATATGAGCAATGATAGAAAAATTAC GAAT GTTCTCA  
ATTTTATACGGTTTCAATGTTTTTAACC GAGT TTTTGTTCGAAAAGGACATGTTAACG GAAT TGT GAGT  
TGTCTATCTAGAGAAAAGTAATCTAGATCTAGAAGAGT TTTATAAAAAAGGCGAGG GGAT TTTTGAACACA  
AAAGAAAAGCCCCGTCGAGATAGAACGGGGCTCTTTTTTAGA GAAT TTTTAGAAAAGTCTTATTAAGAAA  
CACCTTCTATAGCAGGAGC GGATTC TTTAGCCGCAGAAGAAGCTTCCTTCTCTGCTGCAGCTTCTGTC  
TAATTC CTGTTCTTTAGCAGC GGAT GCAGCCAAGAACAGTTTGT TTAGTTTAGTTCAGATGTCAACCAG  
ACCATGATAATTGCAAAGAGAGCAACAGCTAG GAAT GGAGT CATAGCGCCGATGCTTCCGCAAACGACCA  
AGAGACCTTGTG GGAT CAAAGATCC CCCAGATTTACC GAAT CTAGCGGCAACAACGTCAATAGCAGCTTT  
CCCTTAACTTTTTGCTCTTGATCC AATGGGAT GTAAGCCAGCTCTTTAGTTGCATCAAAGAGAGCATAT  
TTAGTTGATTTGGAAA GAATATTTT GAAT GGCTCCGACAACAACGGCTAGCATTAGTGGTGTGTTCCCA  
AAGCAGCAACTAAACCTGTAGCATGATCTCTGAAGATAACGAGAGCAAAGAAGACAGCTCCTGTTACGAG  
AACCATGATAGGTGTAACCAAAGCTCCAGTTAACCAACC GAAT CTAC GGAT AACGTTACCACCGATGAAG  
AGCATTACAAATACAGATAACA ACTC CTGTCCAGAAAGAGAAGTTCCCATAAATGCGCTGTAGTCATTT G  
GAT TAGG GAAT TGCATTTT GAGT TGGCTTTTCCAAGTTACTTCAACGAGGTTAATGCAG ATTC CGTAGCA  
AATAACTAGAAGAGCTAGAAGAAGCATATAAGGAGATCTTAACAGATAAGAGAAGCTTTGCCCCATGCTC  
ATCTTAGGTTTAGATTTCTTAGCTTTGAGCTCTGCA GGAT TGTA GAAT CTAGGAT CTGTAAGCACGTAGC  
GGTTC ATCC ACCAGTAGCAAGCAGCAATAATAGCGCAAGAACAAGAACATAGCCATTAGGAAATAGAG  
GCTG ACTC CCCAT GGGT CAACGCC TTCGCCAAGGCTAGCACGTAATTTAGAAGACCAGATAATAGCTGGA  
CCAGAAATTAAGAGAGCTACGTTAGCTCCT ACTC CGAAAAGAGCGTAGAAACGTTAGCTTCCGTAATTT  
TAGTAATTTCAATTGGCAAAGCCCAGAACATCAAAGAGAGCATAACGCTTCCCCAAAGTTCAGAAAGCAC  
GTAGAACACAGCAAAATGTCCAGTTGCGTAGCATCGCAAT GAATCC CATAAATCC GGAAGGAA GAATGGAT  
TGTA GAGT ATCAGCGAAAGCTGTT GGGT GAA GAAT ATGACGGCAA GGGT TAGATCACCACAGGGAACAGTG  
CGAA GAAT ACAAC GAAT GGTGAGAGCACTGCGAAGAAAAGAGCCTGTTTGTTCAAAATATTGCTTAGCTT  
GGCGTAGATCAGCATGAACACAACAGCAGAAGGGACGACTAGCCACA ACTTAAATGAAAG GAAT GGCCTCT  
GCTCCAG ATCC CGGTGTGTAACGATAA GAGT ATCTTTTGTATCTCTCAAATCGTGTAATT GAAT GAAA  
TACAGAAGAACATTAGGAACATTGGCAGA ACTTTCTTCAGCTCATGCATGTGTATCGGCCAAAGGAAAGA  
GCGCAATTTTCCAAAAGGTTTTTCCGCGGTTT GAGT CATATTTT ACCC TCTGAAAAGCTTATGTTTATTG

TTAAGTTTTCTTTGTTGATCAAATCAACGAAGATTTAAAGTATTTCTTTAAAAAGTCGTGAAAAAATTTT  
GATTTACAGACTCCCTATTTTCGGCTGAATCTTCGATTACGTGAGGAGGAGATGCCCTCCACTCAAGGAGC  
CCAGGAGGGCGGAATAAAAAATGGCAGAAATCCAACCTTTAGGAAAAGATATACCACCAAAGGTCCTCGG  
AAGGCAATAGAAAAGGGCTGTATGCTGAACAAGCAGAAAGGTCCTACTGAGAATGAGCCTCTGAGAAAAA  
AAGCTTTTATTAAAAAATTAAAAAAGACTTTACAAAACCTTATTCGTAGGTTGAGAAAGAGCTTCAACG  
TAAGCAATTCCAAAGCTCCGTACTTACAATATTATTGCGGATAGAGCGAATTAATTCCTTTTTTAGTGATG  
GAAGAGGTTTTTTGGGGCTGAAGCGAGCCAAAAGATCTTTATCGCCAACTTGACGAGCTAACTCTAACAC  
CCGTTTCGATATCGGTTTTTTGTGAAATTCACAAAGTCTCTGCGCTTTTTTAGAACCTCGAGGAGCTCGTGGT  
TTAGGGCTAATGGATCTGGGAGTGATAGAATCGATCACAAACGCTTTAACATTTTTAACAGTTGCTCAG  
GAGCAGAGTTCTTCATTTTTTTTTTAAAGTAAAATGGTGCATGTAGCCGCCTGTTGGCCCTGGGAGATAACG  
ACAAAGATCATTTTCTTTACTTCTCCGACTTTGCTAATCGCTTTAGTTATGAGCTGCTCTATTTCTTCT  
TGGATAGTAATCTGTGCCGTAGCCATGAATAGCTCCTTAGTGGGTAGTCTAGTTCTACAGATGGTAGTTT  
TTGCTTTATTAATTGTAATAGTCAACTAAGTCTGTTTTTTTTCGATTTAATGTTGAGTCAAAATAAAAAATC  
AATTAGTGTATCTTTTTGGTGAATTCATAGTGGTTTTTTGCTTTTTTCGCAATCTCATTTTAGAGATTT  
TTTTGATTTGGACAAAAGAAAATGAAGTACTTTCAGATTTGTTTTCTAAGTTTGTGTTGCATAAACAGCCATCA  
TTTTTTATGCAGGTTAGTAGCAGAAATCTGTTTGAACAATTTTACTTTTTCTTCAGACTCTTTATAGTTGT  
TTGCTTAGAAAACACGTATTAGTATGCATTTTTCTTAGTTGTTAAAATTATTTAGAATGTCTCTTCGAG  
ATGAGAAACGCGCTAGATTTTCTTTTCGGTTGAAGATAAAATTCATCCTGTTAAAAGTATCTTCGCGAT  
AAGCGAGGTTCTTTTTGTGGAGGGGGAGCTCCTTACAGGAGGCTTGTATCCTTTTAAAATAGAGTTTCTCT  
TATGACCCCATGTGGCGATAGGCCGGGTCTAGCGCCGATAGTAGAAATATCGGTTGGTTTTTTGTCCTTGA  
GGGATCGTATACTTTTTCAAAGTATGGTCCCCGATCGATTATCTGGAGGCTCTTATGTCTTTTTTTTCA  
TACTAGAAAATATAAGCTTATCCCTCAGAGGACTCTTGTGTTTAGCAGGCTGTTTCTTAATGAACAGCTGT  
TCCCTAGTCGAGGAAATCAACCCGCTGATGAGAGCATCTATGTCTTGTCTATGAATCGCATGATTTGTG  
ATTGCGTGTCTCGCATAACTGGGGATCGAGTCAAGAATATTGTTCTGATTGATGGAGCGATTGATCCCA  
TTTCAATATGAGATGGTGAAGGGGGATGAAGACCAGATGGCTATGAGCCAGCTGATTTTTTTGCAATGGTTTA  
GGTTTAGAGCAATTCAGCTAGTTTACGTA AACATTTAGAGGGTAACCCAAAAGTCGTTGATTTAGGTCAAC  
GTTTGTCTAACAAAACCTGTTTTGATCTTCTGAGTGAAGAAGGATTCCTTGACCCACATATTTGGACGGA  
TATGAGAGTATGGGTGCTGCTGTAAAAGAGATGGCTGCGGCATTAATTCACAATTTCTCAATATGAA  
GAAGATTTTTCAAAGAATGCGGATCAGATCTTATCAGAGATGGAGGAACCTTGATCGTTGGGCAGTGCCTT  
CTCTCTCTACGATTCCTGAAAAAATCGCTATTTAGTACAGGCCACAATGCGTTCAGTTACTTTACTCG  
TCGGTATCTATCCCTCTGATGCGGAGAAGTGTCTGGGAATGGAGATCGCGTTGCATTTCTCCAGAAGGG  
TTGTCTCCTGAGGCTCAGATTAGTATCCGAGATATTATGCGTGTAGTGAGTATATCTCTGCAAACGATG  
TAGAAGTTGTCTTTTTTAGAGGATACGTTAAATCAAGATGCTTTGAGAAAGATTGTTTCTTGTCTAAGAG  
CGGACAAAAGATTCGTCTCGCTAAGTCTCCTTTATATAGCGATAATGTCTGTGATAACTATTTTAGCAG  
TTCCAGCACAAATGTCGCACAATTACAGAAGAATGTTGGAGGGACTGTTCTTGAATAGAGATAATGCAATT  
GCTTGGTCCGTAGAAGGATCTTTGTGTTAATTATGATCACTCAGACGCTTATGTACATTACTTTTTCTC  
TGCCCTGACGGGGCAATGGCTGCTATTATTGGGCCGAATGGAGCTGGTAAAAGTACTTTGCTTAAAGCTTC  
TTTAGGACTGATTCGTGCTTCTCTGCCCCAAAGCTTGTCTTTGGTCAGAGATTTTCCAAGGCACATCAT  
AGAATAGCCTATATGCCTCAAAGAGCGAGTGTGGATGAGGATTTCCAATGACTGTTCTTGATCTCGTGT  
TGATGGGTGTTACGGCTATAAAGGAATATGGAATCGTATTTCCACTGATGATCGTCAGGAGGCTATGCG  
TATTTTAGAGCGGGTTGGTTTTGGAAGCTTTTTGCAAATCGTCAAATAGGTAAGCTCTCTGGAGGACAACAA  
CAGAGAGCTTTTTTAGCGCGGTCAATTAATGCAAAGCAGATTTGTATCTCATGGATGAGCTGTTCTCTG  
CGATCGATATGGCCTCTTATCAGATGGTTGTAGATGTTTTGCAAGAGCTTAAAAGCGAAGGGAAGACTAT  
TGTGGTCATTCATCATGATTTGAGTAATGTCCGGAAGCTTTTTGATCATGTGATTTTATTAATAAGCAT  
CTTGTGTGCTCTGGAAGCGTAGAAGAATGCTTGACTAAAGAAGCCATTTTTTCAGGCTTATGGGTGTGAAC  
TTGAGCTTTTTGGATTACACACTCAAATTGTCTAGAGGCAAGTACCAAGGATCGTGCTAGATGCTGAGTTG  
TATATTTAGGACACTATCTTTCTATCCAGTTTTTTGGCAGTTTCGCTGATTTGCATGACGACTGCCTTG  
TGGGGGACTATTCCTTTAGTTGAGAGACAGCCCTTATTAAGTGAGAGCCTTTCTCATGCTTGTATCCAG  
GGCTTTTAATAGGTGCCCTTCTTTCTTATAAAGTTCCTGCATTTTCAGATTCCTTGTGGGTATTATCTT  
TTTTGGTTGCCTAGCTTCTGTCTTGGAATGTTTTAGGAATCTCATTTTTTAGAAAAGAAAATAGCTATGCAT  
AAAGATTCAGCTTTATGTTTAGTTTTGGTTTTCATTTTTTGGCGTAGGGGTGATTCCTTGTAGTTACGTCA  
AAGATTGCTGCCCTCTTTTATACAACAAGATTAATGCATATTTGTACGGCCAAGCGGCGACTTTAGGGTA  
TACAGAAGCCAAGCTTGCAATTGATCATTTTTTTGTTTATCAGCTGTAGTGTGTTGGTGGTACAGACAA

ATTTCTGTAGCTATTTTTGATAGA GAATTTGCGTATTCCTGTGGATTAAGAACCGGTACAGCAGAACTCG  
TTGTTCCTCGTATTTATTTTCGTTGGTCATAGTCAGTGGTGTGCGTTCCTGTAG GAATTC TACTCATTCTGC  
TATGTTCTGTTGCCCTCCTTTATCTGCCAGACAGCTTTC GGATAGATTAAGTACAATCTTAATTC TATCG  
AGTATTTTTGGGGTATTTGCGGGCCTTAGGATGCTATTTTTCCGTAGCTTTCACCTGTGCAGACTGTAG  
TGGAAGGAAGCCTATATCGATTATTC TTCCTACAGGACCGCTTGTGTTTTCTTCGCGGGAGT GCTAGT  
TTTTCTATGTTAATTTTTTCATGGAAAACA GGGTGGAT CACTC GCTATTTCCGAAGGAAATGGTCTTA  
TTTTCTCGAGATGAAGAACATCTATTGAAAATCTTTTGGTATTTACGAGAACAAAATACCTATCAAGTAG  
GTGTGAGAGATTTTGTTCGTTCTAGAAAAGTACCAA GAGTATTTTGGTGATAAGGTATTTCCCAGATTTAG  
GATGTTTTTACTGTGTA AAAAGGGAT TAGTCTCCTGTTCGGAACATCAATGGTCTTTAACAGATAAA GGA  
TTAGCTAGAGCTGCTAAATTAGTGCGTGCTCATCGACTTTGG GAAT CTTATCTGGT GAGTCAGTTAGGTT  
TTAATAAGAACGAAGTACATCATTTTCGCGGAAGAAATGGAGCATGTTTTGACAGAT GAATTAGATTC TAC  
TCGTGTCGAGATGTTGCAAGATCC TGATTACGATCC GCATCAGCGAGAGATTC CAAAACGAACAAGGAAG  
TCGGATGGTTGCTAGTATTTCTCCGTACTACGGAGT ATCATTTTTAGAGT TTTTTCTAGTCTTTTTTTCC  
CGGCTTTTTTCTGGGAAGCTGTTTTACGATCATTTGTATATCGATGAC ATTC AGGTGATCGTGTCTTTG  
CAATAGCAGTTTCTTGTCTGTAGTAGGGACTTTTTTAGTGCTTAAAAAGATGGCTATGTATGC GAATGT  
AGTTTCCATACTATATTGTTT GGGT TGGTCTGTGCTGTTTTATTT ACTCATCAGCTC ATTCATTATCT  
ATGCAAGCATTGACTATCGCTGCAGTCTCAACAAC TTTACTGACCGGAGC ATCCATTCATTTTT ATTCGGA  
ATGTATTTAAGGTAGCAGAAGAAGCAAGCACAGCTTTAGTCTTTTCTCTCTTGTTTTTAGCTAGTTTATT  
ACTGCTTGTGTTTTTTG ACTC GTAACGCGCATGTAGGGACCGAGCTTGTCAATTGGTAATGCGGAT GCTTTA  
GCTAAAACAGATATTC TCCCTATATTTTTAGTTTTATTAATTAAC TTT GGGTATTTCTGACTGCTTTTTCT  
CAAGTTTTGTTTGTATCTTTTGATACGATTTTTGCTTTTTTCTTTAGGTATTCGAGT CCGTCTGTGTA  
CTATCTCGTTATGCTTTTTGCTCTCAGCTTCTATTGTTGGAGCTTTTAAAGCGGTTGGCGTGTGATGTCT  
TTGGCTTTTTCT ACTCATTC CTGGGTTGATCGAAAATTGATAGCCTCTTCTGTTCAAGAGATGATGGTGT  
ATTC CATGGTTTTTGGAGTTTTGGCAGCTTTGATTGCCCGGCTCTTCTAG ATCCATTC TTTTCGTTTTA  
CGGAATCGGTCTATCTACTTCAGGAT TAGCTGTGCGTCTACTACTTGTGTTTTATGTAGTTATGTTAGTG  
TTCGTTTTGTTCTAAAAGGGCTATTATGCTCCGTCAAAAAC TTTGATAAGTAAGGCAATGTAGAGA GAATACGA  
GGTCTTTTTGAAGCATTTAGCACTGATT GGGT CAACAGG GAGT ATTGGTAGACAGTTTTTACAAGTAGTT  
CGTCT ATTC CCGATACTTTTATTATAGAACTC TTGCTGCGTATGGACGGAAT CAAGAAGCATTGATCT  
CTCAGATTAGAGAGT TTAATCC TC GAGTGGTAGCCGTTCTGTAAGAAACAAC TTTACAAGGAGCTCCGTAA  
GTTATTC CCTCATATTGAGATTC TTTTAGGAGAAGAG GGGT TAGTTTCTGTTGCTACAGAACCTTCTGTA  
ACAATAACCATTGTAGCTTCGCTGTTATAGATGCTTTACCAGCAGTCATTGCAGCT ATCC GACAGAAAA  
AGACAATAGCTTTGGCTAATAAAA GAGT CGTTAGTGGCAGCTGGA GAGT TGGTTACC ACTTTGGCTAGAGA  
GAATGGTGTGCAGATTC TTCCATCGATAGTGAACATAACGCAC TTTTCCAGTCTTAGAAGGAAGAGAC  
TCTTCTACCATTAAAAAATTATTGTTAACAGCTTCTGGAGGGCCGTTAAG GAAT AAATCAAAGAA GAAT  
TACAAAAGGTCTCTTACAAGAGGTCTTGCAGAC ACCC GTTTG GAAT ATGGGGCCAAAATTACAGTAGA  
TTC TTTCTACCTTAGTAAATAAAGGCTTAGAAATTATAGAAGCTTTCTGGCTATTTGGGCTGGAAGCTGTA  
GAGATAGAGGCGGTG ATCCATCC TCAAAGTCTTGTTCATGGAATGGTG GAGT TTTGTGATGGAACG ATCC  
TTTTCTGTGATGAAGCCTCCCAGTATGCTATTTCCAATACAACATGTTTTGACTTTCCAGAACGTAGCCC  
TGCAATAGGTCCA GGATTC GATTTCTTTCAAATCGC ACTCTA GAGT TTTTCCGATAGATGAAGATAGA  
TTC CCTAGTGTTATCTAGCGAAGC GAGT GCTTCTTGA AAAAGGGT CTATG GGGT GTTTTTTCAATGGCG  
CCAATGAGGCTTTGGTTCATCGATTTTTTAGCAGGCGAGATTTCTTGGCATCAAATAGTTCTTAAATTACA  
AGCTCTTGT GGAT CAGCATCGCGTGCA ATCCTGTTT ATCCCTGGAAGAAATTC TATCGGTAGATGCTGAG  
GCCAGAGCTCGTGCTCAA GAGT GTTAACTATTTCTATGTTCTGTGGATGTCAGTTTTTTTCGATAGTGGTG  
CGGAAAAAACG ATTC GTGTAGTATAGGGACGGCTCTTTGTTTTGTTGAGCGTCTTATAGTATCTTAGGC  
TTCTGATAGAGGCTTGTATAGCAGCTGTTTTAAGTAGAGTATAGTCTGGCTTAGAACAAAGATCATTC A  
GGTATATA GAGTATGACAATAATATATTTTTGTTCTTGCAGCCCTGGCTTTAGGTTTTCTGATTTTAAATTC  
ATGAAC TTGGCCATTTATTAGCAGCAAAGCTGTGCGAATGTCTGTAGAGAGT TTCAGTATA GGGT TTGG  
CCCAGCTCTTGTTCGAAAGAAAATAGGGAGCGTT GAGT ACC GGAT AGGAGCG ATTC CTTTTGGG GGAT AT  
GTTTCGTATCAAAGGTAT GGATAGAAAATGATAAAGACA ATTC TGGAGACAAAGAGAAAAC TGTTTACGATA  
TCC CAGAAGGCTTTTTTAGTAAGTCGCCTTGGAAAGC GGAT TTTTGTTTTAGCCGAGGCCCTTTAGCTAA  
CCTACTTGTGGCTATATTTGTTTTTCG GGATTC TCTATTTTTCTGGTGGTAGAACAAAATCATTTTTCTGAA  
CACACCAGCATTGTAGGTT GGGT GC ACCC TTTTGGAGCAACAAGGCTTACATGCAGG GGAT CAGATTT  
TCTTTTTGTAATGGGCAGCCTT ATTC TGGGCATAAAAATGGCTTTTTTCATCTTCTTCTTGAAGAAAGCT

ATCGTTGCAAGGGCAGCATCCAGCCTACTTTTCTGAGTCCGAGGCTTTTTTCATTAGAAGCACCGTTTAAAT  
CCTGATATGGAAGGAGTTCCTTGTGTTAGGAGCTAGTTATCTGCTGTATCGAGGATCCGATCCTTTACCTG  
AAAAATCTCCTTTAGTAGACGCTGGATGTCTGAAGGAGATCGTCTAGTATGGATGGATGGGTGTTAGT  
CTTTTCTGGAGACAAGTTTCTCAAATGCTCAATGAAAAGCAATCCTTTTTGAAGGTGAGCGTCAAGGG  
AAGGTGGTGTGTTGTCGTCAGCTAGGAGTCTAAGCTAAGCTAAGCTAAGCTAAGCTAAGCTAAGCTAAGCT  
AACTCATAGATTGTCAGTATGAAGCAGGTCTTAAAGGCAAATGGGCTTCATTGTACATGCTCCCATATAT  
TATTAATGGGATGGTTTTGTTGAAAGTAAGGTCAAAGCTCAACAATGAGCGGGTATCTTTGGACTAT  
AATCTAGAGTATAGGCGACAAAATCGTAGCCGTTGATGGAATCCCTGTTCATGAGCAATGC GGATATTTTAC  
GTCTTGTTCAGATCATA GAGTGTCTTTGATATTTCAAAGGATGTCTCCAGAGCAGCTGACTGTTTTAGA  
GCAGAAGGCTGCAGATCAGGCATTTATTAATTCCTATGATATGGACGATCTTCTACGTGTTGCA GAGTCT  
GTTGGAGAGGAACGTGAGGTATCCCGTTTAGGGATATCGTTTTGGTAACACGGGTGCAGCCTAGACCTT  
GGGCACATATTTATTC TGAGGCGTTGTTGGACAAAACAGCGAGCTCTTGCATCCAGTTCCGAGATGAACA  
AGAGAGACGTTATTATCTCGAAA GAATAGAAGCCGAAAAACAGCGGATTTCTTTAGGCATTCCTTAAAG  
GATCTAGCCGTTT CAGTACAATCCGGATCCCTGGGTATTGATGGAGGAATCCGTTTCAGACAGCTTAAAGA  
CTGTGAAAGCCTTGGGATGGGGCGGGTGAGCCCTCAATGGCTATCAGGACCTGTAGGAAT TGTGCGTAT  
TCTCCATACAGGATGGTCTGTAGGGATTCTGAGGCTTTGGCTTGGATCGGGTGTATCAGTGTAACCTA  
GCAGTGTTGAATCTACTTCCATCCCTGTATTGGATGGCGGTTATATACTTTTTGTGTTTATGGGAGATTC  
TTTTCCAGACGTCGATTAAATATGCGGCTCGTTGAGAAAGCTCTTGTCCCCTTTATGATTCATTGTCCT  
ATTTTTTGTATTCCTGACCTCCAAGACCTTTCTAGAGTTTTCGTTGGGTGATGTTCTACTTTTTGGGAA  
CCCGTAAAGGCTATAGGGGTGAGCTCCTAAGCAGTGAATAACGTAGATATCTTTACTCTTTTTCTTTATTC  
ACTTTGGCTTTAGGAGATTGTTGTATGCTCGCCTCTATCTCTTCTGGACTTGGGTAAAGCAGAGCTTC  
TACTTCCGTTTTCTTAGGA ACTCCCTCATTAAAGAATAGGGAGGTTTTGTTTCGTAATGATGTATGTGTGATT  
CGCATCAATGATGTAGTTTTGGTGTG GAGTATCTAATCTTGTTCGTTACACAGACCTTGCCATCATT  
TCTTCTTCTAATTGAAACAGTAGAAACTTACTTTTTCTTAGTTCCACTTAATACGAGAACATCAACAGAAG  
AAGGCATTTTTTGCAATGTTCAACATATGCTCAGGCTATATGTAAGAAGCTGCATACCAAGCTTCTGCC  
AAAGACAAATTGCACTAAAGAGCTTCGGCTATAGCGTCTTGCTAATGTAGACCCGTCATTAGGAGCGCC  
ATAAGACCGCTTTGCCTTTTTTAGCTTCTTCAGGACAATCGGGATGAGCTAATGCTACACGAACAATAA  
CTCTCCTACGGAATGCGTAACGAAATTAATCGGTATACCAGGTTTCAGTTCTGCAATCTTATTGAGTAA  
TCGAACAAGATGTTGAGCATGTTTTTCTAATGTAAATTTTCGGGTTCATAGTTCCAAATGAAAACATCA  
TAGTTTTCTTTTTCCAGA ACCCGGCCAATAGGTTTTAGCGAACCATAGGATCTTAGAAACCGGTGAACGC  
ACACAACAGATTCCTTTTTCTTCGCGTATC GAGTTCACCCAGCAACCCCTGATGTCAATGTTTGAATCAC  
AGAGGGATCAGCTAATAGGGAAGTCCCATTAAATAGAAA GAGTATAGTTAATAAAAAATTCCTCATTTCG  
CAACACCGATTAATATTTTAAATAAGTTTGTTTATTA AAAACAGGTGTTTACTTAGTTTGT  
TATGTGATCCAAACATCTTTTTATCAATAAAAATAAACAACAAAGTTTGTTCATTAACAACAGTTTTT  
TGCGAAGGAGAAATATAGAGATTGAGGAGCTACAAGGGATACTTGAGCTTGTGTCACATGAAAAATGCA  
GGATGTTGTGCTGCGGTGATCTGGACAAATAGTAGAAGTTGTAACCACTTGCCCTAAA GAGTGTGAGAGT  
TGCAGAAGCTGATCTAAACGCTGTTGATCTAGACAAGCATGGATGTCATCCATGCACAGAAGA GGATGGA  
TACAAA ACTCTTCTTGAAGATACACGCATTCAGCAAATCGAAGAACGGCTAAAAGCGAATGTTTTTGCC  
TTCGCTGGAAAATTTAGCAACAGGAAGATCATTGATAGTTAGAAG GAGTTCGTCCCGATGGGGCCCTACC  
ATAGTATAGCCAAGATCGAGGTCTTAGTATTTGCTATGCGAAGTTGTTTCGTAGTAATT ACTCGCTATGT  
CATTGAGGGTAGGGGATTCCTCTGTAATGAGAGA ACTCTCATAACGAAGAGATA GAGTCTCTTTAACGT  
ATTATCCCAAAGAGT TTGAAAGATCGTATTTAGCTTTTTTAGTACATTCATTGCGTAAGAAGGCTACCAGA  
CTACCATAAGCAATCAATGGGGAATTCATGCAGAAATAGCTTCTGATTC TGAGCTTTAATAGAAGCGT  
TACGCTGGTCTAAAGCTTTGTGGTAGAGAGAAATATGCTCGGTGATTTATCTGAAGCTTGTGCTAGTAA  
GAGGTCTAAAAACGACGACGTTCTGAAGGGGAGCCTTCAATAATGCTATGTCTTTGATGGAAAACAAA  
ATAACAGGAAATA ACCCTACTAGCTCAGA GAGTTCGTAATAGGAGCTCCGTCAAACA GGATCTTCTTCC  
CTTTTTTATCCACTTGAATAGAAA GAGTATGAAAACCTCTTTATGCGAGAACACAGCTTCTATAAAAA  
GTGGGATGCTCCAAAACGTATGGCATCGGTGAGTCTGACTAGTTTCGAAAAGACCTACCTAGTGATA GAATG  
TACAGAGCCTCAAGAAGATTCGCTTTCTTGTGCATTAAGACCGAAGATG GAATTCATCTCCGGTCCCTA  
ATTC TAAACGAAGATCTGTATAATTTCTGAAATCC TTAAGAAATAAAGAAAGA ACCCGCATTAATCGTCA  
TGTAATCTCATGGGCATGATGACAAAACAGCTGCGAGTGGAGTCTGTAATGATTCCTGGATTGTAA GAAT  
CTGAGATACCTAATTGAACAAGTTCATCACGGCTGTGTTTTCA GAATGTCTAAGAAGAAGAAA GGAT TAAA  
GGCTATTTCTAGGGTTTACCAGTATAATTGACAGCCATACTTACCTTGCTTCTCTACTTTTTGTGCG

TTGGCTGTAAGAGT TAGTTCTCCAGGTGAGAAGCTAAATTTGACA GAATGCGAAGACTCATTAGTGAAAA  
GGGCCACTTGTGGAGAAGGGAGATCAGTTCTTCACGATGTAGATCTAATTGTACACTGCTAT GAGTGGA  
GATCACAGGGGAAAAGTCCGG GAATTCACCAGAAAAGGAGT TTTGGTTACTAATAGTGTATTTCCACATTCG  
ACAGCGATTTTAGT TTTGATCTAAGAAAATAGT GGAT TGAACATCTTCCGAAGACATGC GAATAATTTCTT  
CGACGGCTTTGATAG GGATGATATAGTCTCCTGAAAACTA GGATCTAAAGAAATCTCTGTATCGATCTT  
AGCTAACCGTTTCCCATCAGTTCCACGACTGTCATAGTTCC ATTCGCAATAGAAAAGTAAAACGCCAGTG  
AGTACATAGCGACTC TCTTCTCT GGATACAGCAAAAAGAGGTTCTTTGGAACATGTCTTTTAATCGCTCAG  
AATCCA GAGTGAAAACGCAGAGCATTTTGCATATCAGGAAGCATAGGGAAATCTTCTTTCCCATACTTAA  
CAGGCGAAAACAGGAAGA ACCCGACGTGATTGTCGCCATTTCTCCA GAATGAGCTGCTACTTCAATATTT  
GCCTCTGTAACTC AC GAATGAGT TGGAA GAATCTTCGAGAAG GGATGGTAACAGATCCAGACTCATAGA  
CCTTTGCTTTAACAACACAAC GAGT GCTGACCGTCAGGTCTGTAGCCGTGAAAACCA ACTCATCGTTACA  
GCTTTCAAT GAGTACAT GAGTCAATACTG GAAT TGGCGTGCTTTGTGGAACGAC ATTC TGAACTTTTTTA  
ATTAGATTTCTA ATTCATTGCGGGAGATAAC GAAT TTCATTATTTTCTGTAAATCATGTAAGTCTGT  
GGAATGAATA ACCATGTTTTGTGACATGGAAGCAAGTAAGTCGTCTCTCGGGGCTAGCTTTAGTAAAAA  
TATCTTGACAAAAGAC GGATTTGAAAAGCCCCATGAAGGCGGAA ATTCACATGGTACTTGCTGATTAGG  
AT TATTATCAATGACAAAGGAA GAATCC TTTTAAGGAGAGAGGGGCATACGGTTCTTTCAAGAAGAAGCC  
CTTTTTGCTAT ACTC TCTTAGTTTTTAAAGAGGTA AAAACATGGGCGTTAAGGAAATTTGTTTC GAATCGC  
AAAGCTTTTTCATCATTACGAGGTTTTAGAGACCTT GGATGCAG GGAT TGTTTTAACAGGAACAGAAATTA  
AATCTCTGCGAGATCATGGTGGAAAATTTGGGG GGATGCTTATGTGACGATCTCTAAGGGAGAAGCTTG  
ATTACAGTCAAGTATAGCTCCATATCGTTTTGG GAATATCAATAATCATGAAGAGCGCCGCAAGCGCAA  
CTTCTTTTACATAAGTACGAG ATTCACAACTAGACGCTCGCATTTCTCAAAAAG GGAT TGACGGTTGTGC  
CGCTTAGCTTTTTCTTTTCTAAA GGAT TTTGTCAAGGTGCGTATTGGCTGTTGCGGAGGGAAAGAAAGCTCA  
TGATAAGCGGCAGTCTATTATTGAACGAGAAAA GAAT CGTGAAT TGGCTGCAGCTATGAAACGTTCTTGT  
CGGTAATATATGCGCAAAGATGTTTCTTATTTGCCAGTCAAGAGCTTCTTGT TTAGAGGAGAAGGTCGT  
CAGTGCAGTAGCCATAGC ATCCGCAAAGGCGCAGCTTTCGTTGATCACGGAAACTGCAA GGATGGATGG  
CTGCTATCTTCTAGAG GAGT TCCCGTTAACGGGT CAAGAATGT GGGTGTAGGTTTTGTTGTCCACATGCC  
ATCGTTGATATTG ACTC CCGCTCGTCGCTATAGCATGATCATGCAGATGAAGAAT CTCTGGGGTAGCTGA  
TGAAGCGACAGCCCAAGATCTTCCGGA GGATGTTTCCCTCTGGTTTTGATTTCTCCTCCC ATTC TACG  
TAGTAATTTTGACA GAAT TGAGCACAAGCTGTTCCCTAATAGATCTACAGCAAAACCTTTTACAGTTCCGC  
AGAGATCTAATTGGACGAGAGGGCGAAAGTTTCCCTAAAGTTTGTCT GGGTTTTATCAAGAGAAATCAGATG  
CC ATCCAGAGCTGTGTTTGTAGAGGTGTTGGAGCTCTTGAAGAAG GGATAGTATG GGATTTTAGGTGCAGT  
AGCCATAAGCTTTTTAAAGCGCCTAAGGTGGAT CAAAACGGCCATCAGAGAAGGCGTGGAAATGTTCTA  
TTTTGCATAGAAAAGCAAA GAGT GCTGGCGATAAGG GGATAG GGGT TTTGTTTTGTGGTGCATTAATACG  
GGAAATTTCC GGATAGAGGATTC CAATTATTA AAAAGTTTGTATCGATATGATCAAAC ACTC GATCAATTTCC  
TTTTGCGCTTTGTTG GAATGCATCTGGAGAAAGTCTTCTCAAATACAATGCGATAAG GAAT TGT CATA  
GG ACCCCTTCAA GAGT AGTTCTTGAAGGAGCTGAACA GGAT TGGAGGAAGAAGGGGGCTAGGATCAGGAG  
GTATGACGCAAAAAACTTTCCCATGTATTTCTCATTAGCATAGCGACGGTCATTGGGCCGACTC CACCAG  
GGACAG GAGT AATGGCTCGGCAACAGGTACAACATTTGTTAAAATCGACATCTCTACAAGGATATAACC  
TTTA GGATTC GCTGCAG GGATTC TTGAGGTGCCGAC ATCC ATGATCACCGTTTTTTCTGCAATCATCTCT  
TTATTTACAAAGAGCGGT ACTC CAATAGCTGAAATGA GAAT ATCTGCAGTCTAGTGATCTCGGTAAGAT  
GCTCAGATTGGCTATGAAGGAGAGT GACACTAGCATTAGTATCTGCATGTCTTTGCATAAGTAAGGCCGC  
TAAAGGTTTACCTACGATATTGCTACGTCCTAAGATAACAACGTGCTTTCCATGGAGAG GGATCTCATAA  
TATTTGCACAGTTCTACA ATTC CAGCAG GAGT GCATG GGATAAATCC ATCTGTTTCTCCAAGAAGTAGTT  
TCCCTACATTGACA GGGTGTAGTCCATCGACGTCTTTGTG CAGGGT GATAGTGAAA GAATGGCTTGAGC  
GTCTAAATGTTT GGGTAGGGG GAGT TGAACAAGGATTC CGTGGAT GTTCTCATCATTATTGAGT TGGTGG  
ATGAGCGCTAAAATGTC GGATAGTGTGGC ATCCGAGGGCTTGGGATA GGATTTAGACACC ATCCCAAAT  
CCGTAGCACGCTTGATTTTCAT ATTC ACATAGATTTCTGAGGCC GGAT TATTTCTATCAACACAACAGC  
AAGACCAGGAGCTTTGGAGCAGGCTC GGATATTTTCTTTGATTGTTGCTAAAATATGGTCAGCTGCTGGC  
GC ACCCTTTAATAACATGCACAAATACTTAGTTAAATGGTTTTACATAGGTTGTTAGAGGGAAA GAGTC  
TAGACCTCTCTTGATCAGTTTACAAAAGCTGAT GAAT TTTTAAAAC TAGAAGACTGAAAGA GAATCAGAT  
CTGAG GAGT GAAAAGACTTTTTATGAGCCAGAAGACTGAGAAGCGCCCCGTAAGGTAGATCC ACCATGAGA  
ACGTGTTGTAATCGGCAAGAAGGGCTGTGTTATATAGGCATAGAGGGCGATTGAA GAATGCTAGAACGG  
GGT AAGAGAGAAAATAGAAGTTAGGGAAAATAGAGCACTGATGAGAGGGAAACGAGATCC AACGTTCTTT

AATAAA GAAT CTTTGTGTTTTGTACAGGATAAGAGAGGTGCTCACATACAGAAAAGCTTGGATGCCATA  
AAGCAGGTGGAGCCCATATCACAAAGCAGACCCGAGAGCATAGCCCAAAGCAGCACGCGTTCTTTAGGTT  
GGGAATAGAAAGTAGTGACAATCAAAGGAGCAAAGTACACTGGTCGCCATTCAGGGAAATAGCGAGGAA  
TAAGAGAAAAGTACCAAGAGACTAGGAGTAGAGTGGCTTGGGAGAGATTCCTCAAAGAATGTTTTGATG  
AGCGTTGGGAAAGGAATATTGCGGAGAGGAATATAGGCCTCAATGGGTAGTGTGTCAGCATCGCCGACTA  
TAAAAGATAAAATGATTTACAGCAATATAGAGGGAT AACGGCAA GGAT TGTTAATAATTTAATGTTCTTA  
TCAATTGTTTTATGGTTTTATGAAAAACAATTTTTTAATTTAAATTA GAATAGATTTTGAAATAAATTA  
TCTGGTTTTCTGCTCATGAAAAAAGAAGCAGTCGCAAGCTAGCTCAAGTGATTGGGCGTAAGACGGGAAA  
CTATTTCCCAGCTTCTATTGAAGGCGAAACCAAGAAAGAGCACAAACATCATTACAGCACAGCTCAAAA  
GAAAAA GAGTCTCTACGAAAAAGAGCGAAA GAGTTCGATGTGCTAGTACATTCGTTATTAGATAAACACG  
TTCTCAAATTC TGACCAAGTTTTGATTTTTACGTACCAGAATGGCTTTGTGGAGACAGACTTTCATAA  
TTTTGGGCGATATTC TGTGAACTGTAGTGGGGAGAAAGATCAAATAAAAAACTAATAAGTG GGATTA  
CCC AAAATGGAAGACGGGGAGCTGGGTGTATATATTGGTCTCAAAGACCGCCAGTAATAAAGATCTC  
CAAAATCTTTATCACTGAGCGGTTAGGCATGAGTGCCTGCTTGGGGCTACAGAGATGCACTTTATTGCAT  
CTACCCGCTTTTCTTTTCCGTCTAACCTATTTTTTGGTTTTTTTTTCGCAAGGCCAGAGCTTGGCTTTTT  
TTTTGTCAAATGTTTTTATTC CGATCTTTTGTTTTAATTTATAAATTC ACTGTTTCAGTTTAAAAATTATT  
ATTACCCATTCATTGGTTTTTTTTGTTTTTTAGGAAAAATCATGTCAATTTCTGGAAGTGGTAATGTATCT  
CCTGCAACTCTGATTTTTGACCCATCCATCTTGATGGGAAGACAGGCGGCATCAGCTCATGCAGCCAAAG  
AGGCTCCGGAGCATCCAAGGCTACGGAAACGTCTGCTGCAGAACAACAAGCGTTAATTAGTTCTGGAAC  
GGAAGTACACTATGTCACGGATTTGCAGCAAAGCGAGGGTAAATACAAAAAGACCCTCGATAAGACTTCG  
AAATCTCCTAAAAAAAATTTAAAAGGAATTTTTCCAAAGTACGTGCAGGTACTAAAGGATTCCTTACAG  
GATTTGGAACGCGAGCTTCTCGTATTTCTGCTCGTAAGGCAGAAAATAATGGAGAAGGGATGTCATGAT  
CCCTAGCCAGATGGAATATGTGAAGAAAAAGGGAAATCGGGTTCCTCCTGAAATGCAAAATTTTTATCTT  
GGAGCTTCAAGGAT TATGGAGTCCAACGTCTGATGTTTCTTCTAAAACGGAAAATCGTTTTGGGAGCTACTG  
CCCTGTCAACAACCCCTTCATTGACGACTATGCAAGATCCGTGTCTATAGAGCATCTATCATCTGGAGA  
AATCACTGCATTAGCTTCGTTTAATCC TAATGTTCTGTCAGCTTCTTTGAATGAGCAGACAATTAATGCT  
TGGACAGAAGCTAGTTGGGAGGAGAAATGGTTTCCACTCTCTTAGACCCCAATATTGAGACGCTTCTCTC  
TTCTACGTCGAGCTCCTACCGTAAGTAACGAAGGGATGGTCGATGTTTCGGATATGGGAAACCAGACTAC  
AAGTTTATCCATGGAA GGATTAGTAAATACTGTTGTTGATGATCCAGCTTCTGCAGAAGAAGAAAAAAG  
ACTGGAGAGCTCTCTTTGGAAGAGATGGCAGCCATGGCAAAAATGATGGCAGCGCTATTAAGCTCTGGTC  
AAGGGATGGCAGTTTTTATAGCTTCTTCCACTCCTAGTTCAAGCTCAACACAATTTCTGAACCTAAGTT  
CTCAGGAACTATCC CACATCATTTTCTAAAAAGGAAGATAACGAAACCATTTGGGGATTGGATTC TCAG  
ATAGGAAGCATAGCGTTTGATACACGGAGAGAAAAATAATGCGTCCCTTTACCAGACAACAAGCTGACAG  
AGGAGGCTTCTTATAGGTTCCCTGTAGGAGAAGCTCCTTTGGATGTTAATGAAATCCCTTTTGCTGTTCA  
ACATAGTACGGTATTTTCAGAGGAGACTGC GAATACAGAACAAGCTCTTATTCAGAATGAGAGTTTGGGA  
GAGATACCAGTTTCTGCTGAGGTAGTAGGACAAGATACGGTTAGTTCCGGTTACCAGTTTCTTCCATT  
TAGGGATGGCCGTGTAGCCTCGGTTCTCTTCTACAGAGGAT TATAAGACTGCGGTAGAACATCGTAA  
AGGTCTGGAGGACCTCCAGACCCATTGATTTATCAATACCGAAATGTGGCTGTTGATCCCGCCATTATT  
TTTTCAATCACCGTCTCCATTCAGTGTTCCTCGGTTTTTCCGTGCAAGGTAAGCCGGAAGCTGTAGCTG  
TATACAATGATGATCAAGAAGAAGCTGCAGGTGGAATCGAGATAGTGATGAAGGGAAAGACCAAGAGCA  
GGATAAAACGAGAGAAACAGAGGATGCAGGCGGCGATTCATGA GAATAATCCCTTTTGATCCCTTATGGAT  
CCATGGCTTTTCAAGCGATAGCGAAAGATCC TCAAGAGCGAAA GAATGGGAGCATATCAGAGAAAATTC  
AGAAGAGATTGCTCGTAATGAAGCTTTACGCATGGCTTTATTGGCTATTGCCGATCAAGAAGATAAAGAA  
AAAAACAAAAGCATCGGTTCAAAATCTTAACCAAAAAACAAACCA GGATGTTGCTTGGTCAGCTACGTC  
ATTTCCGATTGGATTTCCAAAACTGCAAGCAGGAGTTGTCATC GAGTGGTCTTGGGATGATAAATCCAA  
GCGCTCTAAGTCATTA GGATCTC GGATTACCAGAAAATCTAAGAAAACGATCTGTATTAGCGCTGCTGCA  
GCACAAGCTATTGCTCATGCCGAGAGGCTTGGGTGATTGCCCGCAATGAAG GAATCTTGGAGATGACGT  
TGTCATATTC CAACATAAAGACAAC GAATAATCTTGCAATCC AATCAAGCAGCTGTTTTTTTTTCGCTA  
GGAGGGAACGGAATGATTAAGGATCTTTTTCTTTTTCTTCTTGGATCTGGG GAGT AATACAAAGCACACT  
CTCTTACTAATCC TTCCCATATCGCTTGTATTTTGTCTTGTGCTGTTTTTCTGTCAGATTTTCAATGACAAT  
CATGCTTCTGTATTAATAAGGAAGCCATTC CAGACCAATTGACAGATCC TGTAATTAGCGTCTTTTTA  
TCGAAAATGCCAAATTTATGATGTAGTTGGTACG GGGTACCTTTTTCATAAATAGAGAGACTA GGATGTT  
CTAATTGCTTAATTTGCTGTACGGTAAA GGATTTGTATCC TTTGTCGACAAGGATCACTACATCAACACC



ACAGTTTTGTGCGGCATTCAATTCAGCAATAATCTGAGGTAAAGTGAGAGCAAACATACCTACTTGGATG  
GATTC TTTCGCTGATCGAATATGGTGAAGAACTGTTTCTAGAGCAGCAGAACTCCCTCCATCAAAGGAAA  
AATACTCGATGAGTTGATTGTTAATAAAGCACCGACCAGAGGTTTGCCTTTAATAAAATGACAAATTC  
TGCGCTTTTTTAATCCAATTATTAGGTTAGCGCTCTTCTCTAACGAAGCTAATGTAAAATTAGCAGATCCG  
ATCCAAGCGAGTTCTCCATCTATTGCCATAGTTTTTTGATGCATGAGTTTTCTGTGCATGGGAGGATGTT  
CTCCAAGGTAAGATAGGGGAGACTGAGAGAACTCGCATTTTTAGAGATACGTTGGTAATGAATACATAC  
AGGAATGCGAGCGGACACTTGTTTTTTCAAACCTGTCGTGATAGCGGGAGCAGATAGGTCATAAAATACTG  
AGAAAAATATCTTTTTTTGCAAGGTTCTATCGCATCACATAGTATTTGCGTTACATTTGTCTCCACACTGTT  
TGGTGAAGATAACAGGTTCCCTGGATTCATAAGCGTTTGGAAAGGTATCAGCAGATTGAGTCGGGGCTGG  
GGCTTTTAGTAAAAATCC TCCAACAAAAAGGGAAACTAAGCTGAACATTATTTTGGAAATAAGGTGTTTT  
GTTTTTTTCAATTTGATTGTGTTTAGCTCCTTGACACCTCGATAAGGTGCTGTTTTTAATCTGCTCATGAA  
TAGTTGTTACTAACATGATTTTTTACGGCTATTTATTTCTTTTAATTA AAAACAAAACAAAAATCTAT  
TTTACAATCTGTTTTTAAACAAAAACAATAAAAAAGGTTATTATGGGAAATAGCTATGCCAGCGAGAAG  
AAACAAGATTTTGCCTTGCCTCATCAGCTTCGACTTCCTTAGGAT AAGGAGGTTTCATGAGGGCATTCCAG  
GATCATGGGGGGGGTGTAACTCACCTTGTGATTAGTGATTTGACTTACAGGGATGTGTAAATCTGTTGCA  
GGAGAAGATCGTGTAATATTC TCCATATAAAATTC TTTCGTA TAGAGAGACTGGATAGATCTTCCA  
CTAAAAATAACAAGAGGCCAATCTGCTAAATGGGGT CTTGAGTAGAGCGGGATATCTAGCTGCTGTAG  
AGAAGTTTCTAAAACTAAACAACCTCTACAGAAAATCCTATTTGAGATATTC CAGGAAGAGAAGGGCCT  
CGATACCGTCTGGGTAAAGAGCGGATGGGAGCTCCACGCCTAAAAAATACCTTTGGATCC TTTATTGA  
ATCCGCTACCTGTATAATCCAGGGTATCATTC GCAGTCTCCGAAA GGATAAGAAGATCGCGGTCAA AAT  
CATGCGTTCTAAAACGCATTC TAACAAGCTAGAAAAGTTTTCTAAATCTACGGATGATCTGTAATCCAT  
AGAAATTTTTGTTAAGGAGGTTGTCCCTCTCCAAGTATTCGCAAAGCAGAGCGTAGAGCTTCCCTCCAGT  
AACGTTCTTTAACTATAGCTGCAGCCAGAGCGTGGAACCCGGCTTCTCCATAGCTTTTTAGGTCCTGAAC  
TC CAGGCATGATCAGAGGGAAGAGAGGAGAAAGTAGTTCTTGAAGCTTATTTCCCAAGAAAAATCTTCT  
TGAAAGGTTTTCTACAACAGTCGAGGATAGATAGCATCTTCTTATGATATAAGCAGTTGCATTTAA  
AGATCGGGAAATCATGTGTTAAACTATAGTATCCGAAATGATCTCCGAAAGGACCTTCTGGACGACGTT  
GCCTGCAACGGCCTCGCTGTAA GAATGAATTCAGAAATCACATAGCAGAGGGT GCCCTGACTGCGGATGC  
TTCTCTACAAAGCTAAGCTTTTTTATTTGTA AAAAAGAACA AAAATAAAAGCTCTGGAACATTC TCTGGAA  
GAGGGCAATAGCAGATA GGATCAAAAAAGGATTC CAGATAGGAACACTGTGACAGGAAGATTTTGT  
TTTTGTTT CAGCTTCAAAGAAATGGGCTCCACCACCTTTTTGAATTTGGAAATGTAATCCCAAAGTCTCT  
TTATCGAAGCGCTGCATACGATACATCCCTAAATTAGGGACGCCATTC CAGGAGATTGGGTGTACACCA  
AAGGAAGTGTAAAAGGGGCCCATCTTCTGGCCAGCTGGTAAGCATAGGAAGCTGGGAGAGATTAGG  
AGCATCTTGATAAAGAAAAGGGGAGGAGCGTAAATGGCGTTTACGCATTCCTAATGCAGAGATTC CACGC  
TTGAAAAGAGAGCGGTGCTTCCACAAAGAAGAAAAGAAGGGGGAGAAGATAGTAAGTGAATAATTTGTT  
CAAAAAGATCTGAAGAGAGATCTGGGAACAGTAGGTTCAACACGTCTTCGAGTGCCGAATAAATAGTGAG  
CACAGGGAAAGGCGATCCCTTAACCTGATGAAAAAGGAGGGCTGGTCCTTCTCTTTCTACAACACGACGA  
TGGATTT CAGCGATCTCAAATGGGATCTACAGGAACATGAATATCAATGAGCTCATGTTGAGAGCGCA  
AATAATCCACTAAAGATCGTAAGGAAAACACGTCTAGTCCGCTTATTCGAATATAAAAATAGTTTTCCG  
AACTGCCCCAAAAGGCTATGTGTCAGGATAGATACACGCATGCTGAGGGAAAATCTTCTCAGCATGC  
ACATAGGAGACTAAAAACCTTGTCTTTAGCTCTAGCAACAACCTGATCTAACCC TAGTTTATCAACAAG  
GCGTAAAGCTGCTGCAGAAATTTT GAGTTTGAGGAAGCGATTTTCTCAGTAGACCATAGTCTCTTAGTC  
ATCATATTAGGGAA GAATCGACGTTTTGTTCTTCTGTAACCTTCAAACCGATCCCTTTTTCTTTTTAG  
AAATCCCTCGGATAGCATAGCTATAACCGCAGCAGGCTTTCTTCTGTAAGCGCACATTTTTTCGACAT  
GACTTTCCTATATTC ACTGGCCGCTATCTCTCGACAGGGCAACTGTAACAAAAGAACTATGTTAGACC  
TTTTTTAATATATCGGGAAGAAGTTTTCTGTA AAAAAGTGGCAGAAAATGTGTTCAAATAAAAAGTACTC  
AAGGAAACCTAAAATAGAGCCTCAAGTAAAGAAATTTAGCTTAGAATGAGAGGATAAATCTTCAATAGAAG  
GCTTA ACTCGATACACCAATTATTTTTGAAATAGTTCTTGGCAGATTGATTC TTTTCGTAGCGAGGAGT  
TTTTGATATCAAATCCGGGAACAGAGCCAGATAGTCATTAATAAGATTGATGCGAAAAATAGAAGAGGTT  
TTGTGAGA GAGTTTCAGGATTTCCGGTATGATTGTGAAGAGATA GGGTGGAA GAATAGGGGAGTCTAAAA  
ACTGAGCAAATAGTTTGGATTCCTGAGGAGATTC TTTCCACCATGAGGCTAATGTAGAGGAATCATGAGT  
AGAGAGGCTTGTGACGGATAGAGGGT CGTATTGATCGAAAGGGGTATAGGCTCCATTCCTTCCAGTTT  
CGTTCCCAACGAGGAATTC TAGTGCCGCATACGGCAAAGACTCGAGCATACGTTTACATCGGAAGGGA  
TCGTTCCAGATCTTCTCCTATAGGTAGCATAGATGAACTGGTCAAGAGGTGAGATAAGATATCTTGCC

TTGAGCTAGATAGTCTTTCCGGATCATGAGGTTCAAAGCGTCCGCATCCAGACTCATCCCATACCCAAAAT  
CGAAAGAGACCGACGATATGATCAAGACGGTATAAAAGGTAAAAATTCCTCCGCATAACGTAAGCGTCCT  
TCCACCAGAGGTAGTTATCTTGTGCAAAGTTTTTCATATTATAAATGGGGAGATGCCAGTTCTGACCTTC  
CGCATTATACAGGTCAGGAGGAGCACCTACAGATTCGTAAGAGGAAAAGTAATGCCTATAAAACCAGACA  
TCGCAGCTATCTTTACTGATTAAGATAGGGATATCCCTTTGATGAGACAGCTTTTGAATTGGCATGCT  
CCCGCACTTGTGTCATCTGTTGGAAGCACAAATACTGTAGATAAGAGTGAATTTGTATATCTTCCGCAA  
AGTACGTTTCATGCTCGGTAATCTGGGAGAGATCTGTGTAGGTGGTTGGCCAATGATTAATAGGAAGGTTA  
TCCAAATGTTCTCGGATAGAGCGAAAGAGAGCGTAGGGATGTAACCAATATTTTTCTGTTACAGAAAGG  
CATAAAAATCAGGATGATCAGTGGATTTTTCTGTTTACACACGCGGTAGTACTCTTGAAAAAATCTCT  
CTTCATAGAGCGAACTTTTTTCATAATGTACTTTGAGGAAGTTGAGAAGTTGCTGCATTTCTCGTATGCGT  
GTTTCCGCAGCTGGCACTTCTTTTATAGGGGAGCGCAGAGATAGAAAGGTGAAGAAGGATTTGAGTGCTA  
TCGAAGAAATGCTATTGTAAGGACTCGAACAGGACCTGTATCGTTAATCGGAAAGATTTGAAAGGATTTG  
AAAACCACACGAGATACACCAATCGATCATAGGAATCAGGTCAAGAAATTCACCTATCCCACAACCTTTCT  
TGAGTATGGAGAGAAAATAACGGTACGCATACGCCATGCTTAGGAGAAGTATCTATCTGATTCCAAATCT  
TTCGAATGGAAGATTGCTGGATGATACGTCGGGATGGGATTAATGACGGCATAATTTACAGGTGATACAT  
ACCTAGAGCATGTAAATCTGGAAGTTCTCCTTTTGGAGATAGATTGCATCCAGATATTGGCATGCTGCGAA  
AAAAGAATAAGTAACGGGCGAGCTTTTTCTCCATTTAGATAGGTCATGTTAAGCCGATCACAGAGATAGA  
GTGGTTAGAGATTTACCGTATCCTAGAGTGCCTTTAATATTAGATTGCGGAGATCCATTGATAGACAA  
AGCAGCTTTGAAAATTTTTTGTCTAAAGGTATTCCTGGAAGTTTCCAAGCATGACTCCAGCAACTAAA  
AATCCTGAATTACCATCCCTTTCAATTTGTACAGCAACATTGTTGTATCCAAAGCGAACTATACAGGCAT  
TATTGGAATCAGGAGTAAGAGGGCTGTTGATTTGAGTCCCTAATTCAGTAAGGAGTTGTTCAAATGATT  
TTGCATAAAGGAAGCGCGCTTTTTTATTACAGTTTTTACAAGTTAGGGTGATGGAGGCTGTGTTGAGGT  
AGGTGACGTTGGAATCTCAGATTGAGGTACTGGAGCATGAGGAGGCGTACTAGAGAAGGAAGATCGTGGG  
AAGTCACCTGGTTTAGGATAATCCCTATTATCCGCATTTATCGCATCTAGCGTATTTGTGATAACCGATG  
CCAGCTGCTGTTTTTTTTTCAGCTCCAGAAATATTCAGGCGAACAGCCATTAAGAGCGCGGAAAGATAA  
GTTTTAAACTTCAGTTTGGAGACCAGTATCTGGCCCTACCAGTTCATTTAATGCCTTTTGAGCTTTGGAA  
GAGGAAGGGAATTTATCTTCTACTAATTGTAAGAAGTTTTAGTTAAATTTCTGTCTGTTAAGGATGGAA  
TAGGGGCATGTCCTTCATGCTTTAAGCTATTTTCCAAGTTCCAATATTTCTATCAAAAAGCTATCTAC  
AGAGTGTAAAGGCTTGAGATTGCTTAGTTCGTCATATATACTTGCAATTTTGCAGGAGGAATGGAAGGG  
CCCTCCGATTTTAAATCTGCTACCATGCCATTCAGTAAACTCCATAACAGCGGTTTTCTCTGATGGCG  
AGTAAGAAGCAAGCATTGATGTAATTTAGCGCAATTAGAGGGGGATGAGGTTACTTGGAAATATAAGGA  
GCGAAGCGATGAAGGAGATGTATTGCTCTGGAAGCAAAGTTTTCTGAAGCTAACAGAACATTGCGTCTCT  
CCAACAATCGCCTGAGGATTCGGCTCATCAGTTGATGCTTTGCCTGAATGAGAGCGGACTTTAAGTTTCC  
CATCAGAGGGAGCTATTTGAATTAGATAATCAAGAGCTAGATCCTTTATTGTGGATCAGAAAATTTACT  
TGTGAGCGCATCGAAGATTTTCGTCAGAAGAAGAAATCATCATCGAACGAATTTTTCAATCCTCGAAAATCT  
TCTCCAGAGACTTCGGAAGATCTTCTGTGAAACGATCTTCAAGAGGAGTATCGCCTTTTTCTCTGTGC  
TCTCGGATTTCTTTCTGCTTTATCCGCTGTTGGTTTGGCAGCAGCTTCTAATGATTCAAACTTCTCTTC  
TTTTTTTTTGAATTCGGGTGTCAGCTGCAGGATTTATGAGATCCTCACATTCCTTTGAGCATACTTGCCTCA  
GAAGCTTCTGAGAGCCGATAAACCCTTGTGCATCTTGAGTAGTGCAGCAGCTTGTGCTCGCGCAACGT  
CTACTGTTTGGGTGCTGCCTAGCCCTCCAGCTCCTCCTGATGCAGTCATCTCTCTCACCTCACGGTTAG  
AAAATTTGAATTCCTCCAAAGGCTGGATTCATATTTAGGTAAGAACTTCTTGGTAAGAAATCACAGCGA  
TATCAGGGAATTCGTCTCTATCAATTTCCGTACATAGCGTCTGACATCAATTGCTGTCAACAGCACAGG  
AGGCTGTCCTCCAGGAGGTGTAGGAGTAATAGTCCGCATAGATTTTAAAGATGAGGTTTACAGAATCT  
GGATCTAAAGCCAAATAAGATCCGTCAGAAGTTGTTTATTGCTCCGCAGATCATCTCTCAATTTTCAAG  
GATCGAGCAGATATACAGAAATAGCGGATGCCCCGAGAGAACTTGAAGCTGATATAAGATTTCAGGA  
AGAGCGCACATATTCAGTAAGTAATACTGTATCTTTTTCCGTCTGTGCCATTCGCTCAAAGATTCCAA  
ATAGTTCGTAATCCCTTAATGGATATTTGTTCTTGAAGTAAACGCTTAAAGATTTCTGTAAGCTTCTGTA  
GAGGAATAAGACGGGTAACTCTTTAACAAGATCAGGGAAGGAACGTTCCATAAATTCATCATAGAGCG  
TACTTCTGAATGCCTAAGAACTCTTGAAGATTTCTATGGAAGAAGTAGGACAAGTGAAAGATAATCACT  
TCCAAAGGAGACCAGTATTTAATCGCAGCTTTCTCTAAGATAGTGAGAGCATCTGTACTAACCAGAGTGG  
AAGGCAATCCGTCAGCATTTTTGTAAGTAATAAAAGGTAAGTTATACCGAGATAAGTTTTCTTCTACTTC  
ATTTGTTAACACATGATTTGGTGAATTTTTCCGCGAACGTAGGGAACCTCATTCAGCAGAATCATATAG  
TCATTACCTTCCAAGGAAGGGGAGTCTGTACGTACATGGATTCCTGGATAACGAATTCCAATATCCGAT

AGAGAGCCTGACGCATTTTGTAGGAATCATATCATCCACAAAACCTTGGCCCGATTTGGTTCGTTGTTGGAT  
GAGT TTAGAAAGATCTTTTCCAAGTTCAAGAAT TACAGGAA GAGT CAGAGCATAATCATCA GAAT TTTCT  
CCTGAAGCCGCAGCTCCATCAGCGGCACCTACTGTAGTAGTAGAGCTGGCTCCGCCTTTTTTCCCTGGAG  
AGT TTTTCTTAGTGATTAACA GAAT ACCTAATACTGCAAAGAGAACGGCCATTAAGCAAATGACCATAA  
AGGGAAACCTTTGAA GAATCCGATTC CTAAGGTTGCGCCTGC GGAT AGGAGAAGTGCCCGAGGTTCTTTA  
ACCAACTGGCTAGAAATTTCCCTTACCAAGGTTAGTGTCTTTATCACTAGATA ACTCGAGT GGTTACGATAC  
CAGCTGTTAAAGAGATTAACAGAGAGG GGAT TTGAGAACTA ACCC ATCACCGATCGTAATCAACGTGTA  
GATGTGCGCGGCTTGAGCCATCGTCATGCCCTTCATGGTCACTC CGATGACTAATCC TCCTACGATGTTA  
ATCAAGGAGATAACA ATCC CTGCGATCACGTCTCCCTTAATGAACTTCATGGCTCCGTCCATAGCTCCAT  
AAAGTTCACCTTTCTTTCT GAAT CTGAGATCGCTTATCACGAGCTTGTGTGCGATCAATC ATTC CTGCTCG  
TAGGTCGGCATCGATGGCCATCTGTTTACCAGGCATGGCATCTAATCG GAAT CGAGCAGCTACCTCAGCG  
ACCC TCTCCGCACCTTTTGTACCACGATAAACT GAAT GATGGTGATGATTAGGAAGATAATAAATCCAA  
CGACATAGTTTCTCCAACGACGAAGTCTCCGAAGGCTT GGAT CACGTGACCAGCATAAGCATGAAGGAG  
AAT TTGTGCGGGAGGAAGAAATGTTAATCC CAATCGGAACATTGTGGTGATTAA GAGT AAGGAGGGGAAA  
ACAGAAAGTTGTAATGCGCTGG GAAT ATACAAGGCAACCATCAGCAGGAACACAGAGATCGCCAAGTTAA  
TGGTGATCATAAAGTCCACCATAGCTGGAGGCAATGGCAAAATGATCATCAAGACCACGCCTAAC ATCCA  
CATGGCGAGGAT CAGGTCACCTGGACTTGTATTATCAT ATTCAGGGCCGCATCTCCCC GAAT GTTCTACTG  
ACAAAGTT GAGT AGCTTGTTCATTACAGATTATC GAAT TGGTTAATGTTTTT ATTC TCAAGGTTTTGCGC  
ATTAAGAGAAGTGATATAGAGAA GGAT TTCCCAACAGCTTCATATGTGGTCTCTG GAAT AAACCTCAAC  
TC TTTTCTTTCATCTAGCAGCTGGTGTGCTAAGGGAAC ATTC CGCATGATAGGA ACTCCATATTTCTCAG  
CTTCCGCAATA ATCC TTTTTGCTCTTAAGTTT ACCC CCATAGCTATG ATCC ATGGAGCTTTGTATTTTTC  
AGGCATGTAGCCAATCGCTACAGCGATGTCTTTAG GGT TAGATACAACGGCGCTAGCATGCTTGATTTGA  
GAGGACGT ATCC TCGTAAGCGATCTCTTGAGCAATTTGACGTGCTCGCCCTTAATTT CAGGGT TTCCCT  
CTGTATCTTTGAATTC TTGTTTACCTCAAAATTTTCCATCTT GAGT TCCTTAGCGAAACTGTGACGCTG  
ATACACGAGGTCTATCACTGCAACCACAAGGAAAAATAGGCCAATAGAAGTAACCGCTTTATATA GAATC  
TCTTTAAACACTTGAGCTGTAACCAGAGGAGGA ACTC CTGCAGTTTCAATAACAAGTTCTACACGATTTT  
TTAGAACAATGTAGA GGAT TAAAGCAGCTCCTGAAATCTTAAAAATAGACTTCAGTA ACTCAATGAAAGT  
CTTTACTTT GAAT TTTTGTTCAGGTTGTCAATGGAT TGAAT TTCTTTAAATCC GTTTTGAAAACCTCT  
GTAGAGAAGGTAGGACCAACAATTA GAATCC TATCAACAATCC TAC GAATCC CACCGCTCCTAACAAAG  
GAAGAGAGACTGTCA GAAT CAGAAT AAGGCAATTTTTAAATAATAGATGGCTAAGTGC GGAT CATGATT  
CTGGGGAGCTGTTTTAAAAATAGATACTAAAAAGCTTCCTAAGTGTTCAGCAAAAAATGAAGCCAAAGAA  
AACGTTAAGAACATGGAGACAATGAACGTAATCGCAGAAGGAAAAATCTTGAGATTTGGCTACCTGCCCT  
TTTTTCTAGCGTCCCGAAGACGCTTGG GGT CGCTTTTTCTGTTTTTTTCGCCCATAGATGGCCAGTTGCT  
TAAGCGCTATAAG GAAT ACTTCGCAAGTTACCGTATATAAATGTTTTTCTCAAGAAAGGTTGGCAGAT  
GCTC ATCC CATTATAAACAAA GAGT AAGGGT TGTGTAGAGAACA GAAT ATTTTTTTTAAAGAGCGTTT  
TTCATGAAGCACTAATCTTGCTTTTCTTTA GAAT TTCTTTTTCTTAATAATAAAAAGGCTGTGTTAGC  
CTTAAGAAAAAGCTGTACAACCTCTTAGGTAATGAAAATGGGACAAACA GAGT GCG GAAT AGTAGGTCCT  
CCTAATGTAGGGAAATCAG GGAT TATTTAATGCGTTGACAGGCGCACAAAGTTGCCTCCTGTAATT ATCC CT  
TCTGCACAATAG ATCC TAATGTGCGTATTGTGCCTGTTATCG ATCC AAGGTTAGAGACCTTAGCACGTAT  
TAGTCAGAGCCAAAAGATTATCTATGCAGATATGAAGTTTGTAGACATCGCA GGAT TAGTAAAAGGAGCA  
GCTAGCGGTGCTGGCTTAGG GAAT CGTTTTTTATCACAT ATTC GAGAG ACTC ACGCTATTGCGCATGTTG  
TTCGTTGCTTCGACAATGATGATATA ACCC ATGTATCTGGGAAAAATG ATCC TGAAGAAGATATAGCTGT  
GATTAATCTAGAGCTCGTATTAGCAGACTTTTCTCTGCCACTAGCGTGCAGAGAACTTGGAAAACAG  
GCTAAAGGAAAAAAGATATTGGGCAGTTGCTACCTCTATTAGATCGCGTAGTTGATCATTTA GAAT CAG  
GAAATCC TGTTCGA ACCC TCTCGCTTTCTTTAGAGGAAAAAGTTTATTGAA ACCC TATCC TTTCTCAC  
AGGAAAGCCTATGCTCTATATTGC GAAT ATTGATGAAG ACTC TTTAAC GGAT CTGGATA ACCC CTATGTC  
CAGAAAGTACGGGAGATCGCTAAAAGAGAAGAGGC GAAT GTAGTTCCATCTGTGTAATAATTAGAGGAAG  
AAATTC TATCGCTCCCTCTAGAGGAACGACAAGATTTTTTACATAGCTTAGGCTACAA GAGT CTGGATT  
GAAT CGTTTAGTAGCTTCAGCATAACCAC ACTC TTGGT TAATTTCTTATTTCACTACAGGACCACAAGAG  
ACTC GAGCTTGACAATTTCTAAAG GGGT TACAGCGGCAGAGGCTGCAGGGGAAATTCATTCCGGATATTC  
AAAGAGGATTTATTC GCGCTGAAGTTGTAACATGGA GGAT ATTGTTGCTTACGATGGAAGAGCTGGAGC  
GCGAGAAGCCGGGAAACTACGTGCTGAAGGTAGGGACTATATTGTTCA GGAT GG GGAT ATTATGCTCTTT  
TTGCATAATTAAGGAGC ATTC ATCTATTTTTATTGAGACGGCTTGGC GGAT ATCTTCTTGAAT GGCA

GGACAAGCTCGTCTTTAGAAAGAAAAGAGCTTTTCTTCCCTGAGAAATTGCTCAA**GAAT**CACAGTAAT**ACT**  
**C**TTATCGTAGAGATCTTCTGAAAAATCAAG**GGAT**ATGTGCCTCTAGGCATAGTTGGTGTCTTTGCATTGTG  
GGCGCCATACCTAA**ATTC**CATAACACCTGCATAGCTGA**ACCC**TTCAATAACGATAGTACAAGTATAT**ACCC**  
CTAAAGGAAGTAGA**GAATGGGT**AAGGGGAAGATTGATTGTTGCAT**ATCC**AAAAGATGTCCCG**ATTC**CTCG  
TCCATGAGCAACCTTTCCTGTATAAGCAAAAGGCTCCCAAGAACTTTTCTGCAGAGCACAAATCTTTC  
TCTCTAAGAAATTGTC**GAAT**TTTTCTGCTAGATACAATAGTGCC**T**CAATCTGTAGGGGAGGGACTTCTT  
CTAGAGAT**ATCC**CTAAAGAGGCAGCAAAAGGCCTTAACGTTTGTGCTGTTCC**T**AAACC**ACCC**TTCCCAAG  
TCTA**GAAT**CGTAACCTAAGACA**ATTC**TTGAT**GGAT**GTA**GAGT**CTTGTAATAGACT**GGAT**AAATAGCTCT  
GCCTCTTGATTAGCTATTTCTGGTTAAAAGGGAGAACGGCTAGATAATCAATGCCGCAGCCAGCTAGAA  
GCT**GAAT**ACGCTCCTCAAGAGAGGTAATAGTTTCTGGAGGA**GAGT**TAGACAAAGTATGCTCA**GGAT**GCTG  
GCTGAACGTAATT**ACTC**CAGATTTGCCAGGAACTTCGTTAAAAAGAAAGCAAAGCTTGGTGTCC**T**AAA  
TGAC**ACCC**ATCGAAAAAACCTATAGTAACAG**ATTC**TATA**GGAT**TAGAGGACGGGAGCAGGCTGTA**GAATA**  
AGTCCATTTGCATCAGTAAATAAGGAGATACATTGA**ACTCGGGT**TCGTCTAAAAG**ATTC**CCATCAATAC  
ACTGATCGATAGAGAAGCTTCCACTACGCAACCGTCG**GAGT**TCTTCTAAATAAGCTCCGC**ATCC**CAACAT  
ATTGCC**T**A**ACTC**ATGAGCGATACTGC**GGAT**GATAGTTCTTTTGTGCTGCATTGAACTACAAAATGTAGACGA  
**GGGTATTC**GTATTTAACC**AA**ACGAAGATTTACCGTTACTGTGGC**AA**ACCGTCGTTCTATAGATA**ACCC**CT  
GCCTAGCAT**ATTC**GTATAATTTTTTTCTTGTACTTTCTTTGCAGAGAACATAGGAGGGACTTGT**GAAT**  
TTCCCTTGAAAATAGCTTGTGCAAGTCAAGACTTCGTCCATAGTTGGA**ACT**TTTTTTAGATCGCC**CA**ACA  
ATTTTCCCATCGCAATCGTAAGT**ATCC**GTCTGGTTCC**T**AAATGCGCTACCGCTGCAT**ACTC**TTTGTCTT  
CAAACAGCATGATGTCGATAGTC**GGGTGAAT**TTTCTCCCTATTAGCATAACCATAACGCCTGTAGCAA  
**AGGAT**CTAAAGTCCCTGCATGGCCAATTTTTTTTACACCTATTAACCTAACAAGAGA**AC****GAAT**AAGACTA  
AAAGAAGTTCTCCCTTGTGGTTTGTCTACCAGCAAAACGCCTTCAATAG**ATTC**TGTCGCAAGTTCCATAA  
TATTGATAGTG**GAGT**TCAGA**AGGAT**TGTCTTTTTTGT**TAT****GGGT**TAGTTTTTTTTATCTTGT**TCC**GTATTT  
TCAAGAGAAGACTTTCTATATGGTCTT**GAGGAGAG**AAAATATCTTCCACATAGAA**ATTC**AA**ATCC**GGGAA  
ATATTTAAGAACTAAGTCTTTAGAAAGCCTGAAAAGCAATA**AA****ACCC**TGCCGAAGCTTTTAATGCCG**CA**AGA  
**GT**TTCTTCTTGG**GAATTC**TCATGCGGCATAAT**GGAT**ACGTAAACACAAGCCGACTGTAGGTCTCTCGACA  
AAGAT**ACTC**GTGTTATTGTGAT**CC**AGCG**ATTC**GAAATCTTT**GGGT**GCTT**CAC****ATCC**TTCAAATGACTTT  
TGCAATAGCTTCTCGAAGCATTGC**ATTC**ACTTTCTT**ATTC**TTCTATTTT**CAGCC**ATATTAGCTTACAAT  
GTTTGT**GGGT**GATAAATGACCTCATAGCACTGTAATATATC**ACCA**ACTTGTGCTTGTGATAATTATCTA  
ACAG**AA**TACC**GC****ACTC****ATTC**CTTTTTT**CACCT**CTT**CAC****ATCC**CTTTAAGGCGTTTTAAGGAAGACAG  
AG**ACCC**TTTCCATAGAACCTCTTT**ATCC****GGAT**AA**TAC****GGAT**TTTCTGATTACGTACCACGGTTCCTTCT  
GTA**ACT**AGGCAGCCGTAAAT**GT****ACCC**AA**TG**AGAAGACTTAAAGGTCGCTTTAATTTCTGCAGC**ACCC**A  
AGTTTTTCTCTTCTGCTATAG**GAT**CTAATAGACCTGTCATGATCTCTTTGATAGCGTCTACAGCATGATA  
GATGATGTC**GAAT**AGACAAACTTTA**AC****ATTC**AAGTTCTTGATTAATGGTTCTGCATGGCTTTCTACGCTT  
GTGTGGAAACCAATGACAGTGGCTTTAGATGCCGATGCTAAAC**GAAT**ATCTG**ATTC**GGAAATATCT**CAA**  
**CTC**CGCTAGATAAGATTT**CG**ACATCTACCTTCT**CAG**AGC**GGATATTC**AA**TATA****GAGT**GC**GC**TAAAGCTT**C**  
AATAGAACCTTGAACATCTGCTTTGATAATCAGTTTCAAAGTTTTCTTGTCTGTAATACAGCGTCAAAG  
TTTTGGT**CG**TTTTTTCTGCAAAGCTGCAGATCTTTGTTGGCCAGCAAGTCGGGCGCTAATAATCTCTTT**CG**  
CGACCTTCTC**AT**TTTTTACA**ACT**ATA**AA****GGAT**CTCCAGCTTTAG**GGAT**TGC**GGAT****ATCC**TGTGATCAG  
AACAG**GGGT**AGAAGGTGTTGCCGACTGTAGGAGCTGGTTATGCTCATCATGCATTTGCTT**GAC**CTTCCCA  
TAGCAATCGTTAAATACTA**AC**GCTTCTCCTAGATGCAAGGTTCCATTTTGAACGAGC**AC**GGTAGCTACAG  
CTCCTA**ATCC**TTTATGCA**ACTCGGATTC**CAATAACCAGTCTCGCGCTTAGCAGAA**GGAT**CGGCTTT**CAA**  
**TTC**CAGAACTTCGGCTTGTAAAGCCAACATTTCAAGCAAGTCTTGCA**ACCC**TTCGCCAGTTTTAGCAGAA  
GTATTAATAGTAGCAATCG**ATCC**GCCCCACGCTCAGGAAGAAGATCTA**ATTC**TGCTAACTGACGGTACA  
CTGTTTCTACATTGAAGTTCCGGCTTATCACATTTATTAATAGCGACTACAATCGTAATGTTAGCTCCTTT  
AGCATGCTCGATAGCTTCAATGGT**T**GTCTTTGAT**ACCC**TCGCTCCAGCAACTACCAAGACTACGATA  
TCGCAAACCTCTGCTCCTTAGCTCTCATAGCAGAGAAGGCTTCGTGGCCTG**GGGT**GTCGAGAACAGTAA  
TTTTACCAACAG**GAGT**TGTACATTTGAAGGCTCCTGTATGCT**GGGT**AATTGCTCCAGCTTCTGAGGCTGC  
CATATTGCTTTGCTT**AG**TGCATCAATAATCGTTGCTTACCATGATCGACGTG**ACCC**ATA**AA**AGCTACG  
ATAGGGGAGC**GAAT**AATAAGTTTTTCT**GGAT**CTGT**CG**CATTGACTTCGTCTCGAACTGTGTTCTCTACTA  
GACACAGCTTCTTTTTGCTGAA**GAAT**CAATTTCAATCGTAC**ATCC**AA**ATTC**TAAACCGATGT**ATTC**CAC  
AACCGTTTGGCTATCTAAGACATC**ATTC**ACTACGTAGGTCATGCCAT**GAAT**AAAGAGCTTCT**GAAT**AAGT  
TCTGAAGCTTTTAGCTT**CAT**TT**CAG**CAGCAAGATCTTTTACAGTGATCGGAAGAGCAATCTTAATGTGTG

CTGGGCATTGAACAACGTGTTCTTCCGCTTGCTTTTTTCGTTTTGTGAACACGTTTCTTGCGCCATTTATC  
TTCTTCAGAAGAACCCTTCATTTAATCCATAGCGATCGCGTCTGTAAACGCCTTAACGCTCTCATCAGAT  
CTTTTAGATCGATCTCGTTCAGATCCGCGCTTCGCGTGTATTATTGTTGCTCGTTGACTCTCTGCGAT  
AAGAAGGCGCAGAGGAGGCTGGGCGAGAGCTTGTCCAGAAGGTGTTGTTTATTGTTATGGGAAGCAGC  
ATCATTTTGTGCGAGGCTGTTGTTGAGTAGTCTCTCAGTTGATGCCGCTTTCGTTTCTTAGCTGGAGCT  
TTGAACGTCTTAGCCAAGAGATGATTGATGTGTTTCCCTGTAGGCCCAAACCTTAGGCTTGATAGAAACAA  
CGCTCTTAGGCTCTGTTCTTGTCTAATAATAGGAGTTTCTTCAATACGCTCCGAGTCTCTGGAGAAGT  
CTCTTCTGAAGACTCTTTCTTTTCTTCTTGTGGACCGAAGAAGTGTCTGTGCACTCTCTTAGGGTTTGT  
TCTTTTTGAGTAACAGAAGTAATTTCTGGAGCCTTATTGCAGGGATGGCATCTAAAGTTAAATGCGATG  
CATCTCCTGGCAGAGCCGTTGTTACGGTCCGTTCTGCAGCAAATGAAGAGCGATCTTTTGCGC GAATTC  
TCGCGCAGTAGATTCGTTGCGCCCAAATCCACTTCAGGCGCAGGAGCAGGTGTGCCAGCAGTTTCTTA  
GAGCTCTTTTCTTTAGTTTGGAGCTTACTTGTGGAGAATTTTTGGTGTGAGAAGATCCGGCTTGAGCTA  
GTTTCTGTTTTCAGTTTATCTAAGCCAGCAGCCTTCGTTAACTGTGCGTTCTTAATCTTCAACTTGAGGTT  
TTTTCGTCAACTTTGCCCTTCTCCATATTTGCTGACCTGTTCAA GAATCTTATAAGCTAGCTCTAAACTAAT  
TCCTGGAACAGAAGCCAATTCGCTAGCACTAGCCAGCAATATTTTCCTAATCGTGTGCTATCCTGCGTGC  
TCTAGGTTCTGCACTATCAGCGTATTAATCCCTTCAACTTCTAATGGCTGATCTAATCGAGGGTCTTCGA  
ACTCTGCCAATTGCAAACGTTGAATCTCCAACAACCTGTTGTATTCACTCATTCCTTGGACTTCAAGTTC  
ATAGCCTAAAATCTGACTGATTAGGCGAGCATTGATACCTCGTTTACCAATAACGGTTGCGTAGTCCGAA  
TCTTGGACAATAATAGCGATAACTTTGTGCTTCTTAAAATAGCGATCTTTTGAATCTCTACAGGATAGA  
GCAAATTTTGTAAACAATTCGTGATACAGGGGAATAATTTACAACGTCTATTTTCTCGTCAATTCATTC  
CCGAATGATATTTTGTGCGAGATCCTCGCATTCCTACAAAAGCTCCTACAGCATCTGTTTGGAGGTCG  
GAAGAGCGTACAGCCATTTTTGTTGATATCCTGCCCTCTTGAATTTTAAACAATTTGACAGACCCTT  
CTTCTAGCTCAGGAACCTCCTGAACAATAACTGCTTAAACAATTCAGGGTGGCTTCTGCTGAGAATTAC  
TTCAGCTCCACCATTTCAGATTCCTGTACTTCGTAAAGAAGCGCATAAATCTTATCACCCACCTTATGT  
TTTTAGTTTTTGGATAAAAGCGAGCAGGAAGTAGTCTTCCACTTCCCAAGTCAACAACCTAAATTGG  
CTCCGCGAGCGAAACTTTTAAACC ACTCCGAAATGATTTTCAATTTTTCGGTGTGCGTATTCCTCATAAAT  
TACGCTCTCTCAGCATGACGAAGCTTTTGGCCGATAAATTTGGCGTGCAGCATGTGCAGCAATCCCTCCA  
AACTGATCAGAGATAAAAGGAACATCCATATACTGCCGATTTGACAATCTGGATCGTATTCACGGCCCT  
TATCTAAAGGAATTTCTTACTTGGATTTTTGGCATTTTTCGACGATTTGTTTTTACAAAAAACTTCTAT  
ATCGCCGGTGCAGGATGATACTTACGGACACATTTGCATCGTCTCTAAGAGTCTTTTTTCGCAGCAATT  
TTCAGAGCAGATTC AATAGCACCTACTATCGTAGAGCGTTGAATACCTTCTCTCTTTCCATGTAGTCAA  
AAATAGCCACAAGATCCCTTGTTCATTAATACTCTCTTATGGGTAAAGGAAAAAAGCAAAAAAATAAT  
GCTAACGGAGCAGAGCCCTAGAGCTCTGCTCTTATGTTTGTCTTCACTAACGAAGATTATTAGTAAAGA  
GATTAGTCTCTGTGAGAAGATTCCTTCTCCGATCGTGACCAGCATCTCCCCATGAGCAAGGA ACTCTT  
TAATAGAAAGAGAAACTTTCTTGTGATCTGGGTCTAGCTTGATAACTTTAGCAGAACTTTGTCTCCAAT  
AGAGAGAACATCTCAATTTTAGCAAAAGGTTTCTCTGAAAGCTCGGATACATGGATCAGTCCCTCGATA  
CCATTTTGCAACTCAACGAAAGCTCCAAAAGCCGTAATTTTAGTACTACGCCAGAGATATCACTTCCGA  
CAGGGAACATAGCTTCAATCTCATCCCATGGATAGGAGTAAATGTTTCACGCCAAAGTGATTTTTTT  
GCTTCTTTGTCTACAGACAGAATACTGCTTCGACGGTATTACCTTTTTTGAAGAGCTCTGAA GGATGG  
GAAACTTTTTTAATCCA ACTCATGTCAGAGATATGGATCAAACCTTCGATTCCTGGCTCCA ACTCAACGA  
ACGCTCCGTAGTTTGTGAGATTTTTAATTTCTGCTGTTACGCGGAGGCCGATA GGATATTTTTCTTCAAT  
GTTATCCCAAGGATGTGTTTTGTTGTTGAGACCGAGAGAGATTTTTCTTCTCATTTTTTGGATAGAA  
AGAACAACCTACTTCGACTTCATCACCTTTATTGACCACTTCATTA GGATCTACAATGTTCTTAACCAAG  
ACATCTCTGAAACGTGAATAAGGCCTTCAATTCCTTCTCGATTTCAATAAATGCTCCATAAGGAAGGAG  
TTTAACAATTTTTCCGCGAACACGTTTTCTGGAGGATATTTCTTCTCAATATCTTCCAAAGGATATGCT  
TCTTTTTGTTTGGAGCCAAGAGCTACGCGACCTTTTTCTTTATCAACGCTAA GGATGATGACTTCCAATT  
CTTGGTTGAGTTCAACCATTTC GGATGGGTGACGAATGCGTTTCCATGTCATGTCGTAATGTGGAGTAG  
GCCGTCAATGCCATCAAGATCCAAGAATACTCCGAAATCTGTGATATTCCTTAAACGATACCTTTGCGACGT  
TCACCGATAGTGATTTGCTCGATCACTCTGCTTCTTAGAAATGCGTTCAGCTTCGAGAAGTCTCTTC  
TAGATACAACAACGTTCCGACGATCCACGTTGATTTTGA GAATTTTGA ACTCACAAACCTTGCCCTACGTA  
ATCATCTAAGTTCTTGATCTTCTTATTGTCTATTTGGATCCCTGGAAGGAAGGCTTCCATACCAATATCT  
ACGATCAAACC ACCCTTAACTTTTTCGGGTAATTTGTCCCTTAAACAATAGAACCTTCTCGCAGTGAGCAA  
GAATGTATCCCATTTGTCGTTGCTTGTGCTTTTTCTCTGGATAAAACAACCTTTCTTCTGTCATCTTC

AGTTTGGTCTAGGTAACTTCGACTTCGGCTCCGACAGTTAAACCTTCTGAAAGAGTCGATAAACTCAGAC  
ATAGGAATAACTCCCTCAGATTTTAAGCCGACATCTACAACAACAAAGTCTTTGCTTATGTCAACAACCTG  
TACCTTTTAGGATCGCACCAGGATGTACTTCGCTAGTGGGTCTTCTTCTGTGCGGGTGAAGCCATGTAT  
CGCGTAGAGAAGGTCTTTAAATTGTTTAACGTCTTCTGGTAAGCAAGCTATCGTATCGAGATTCTTTTTT  
GCTCCCAAGTATAATCAGCTTGTTTGGCATTTAATGATGTTCTCCTAAAAACTACAAAGTCAAAAAGA  
GTAGTGTAATATTCACCTTAAAAAAGGCAAGATTTCCCTTGCCTACAAGTAATAAGATGCATCTCTTT  
ATTAATAAAAGTTTCACTAGTTTCTGTGTAATTTTAGTTTTAGATTTTGTGTGTCGAAACATTATAAATA  
TTCATCTAAACATCCCATGGAAAGGACTGTCAATCCTTGAGATTTTCAAAGGATATCGGAGGGGGATGA  
ATGTCGTTTTCGGGAAAAAGTCCGGTGGTTATAGTTCCTTTTTTTGTAAAAGCCGGGAACCTTTTTCTCTG  
TGTATTTAAAGCTCTTTTATCTAAGTTCATATTGGGGTCTCATGACACATGCAAAGTTAGTCATTATA  
GGCTCCGGGCCTGCAGGTTACACAGCTGCTATCTATGCTTCTAGAGCACTTTTGAATCCAGTGCTTTTCG  
AGGGTTCCTTTTCTGGCATTGCTGGAGGGCAGCTAATGACTACAACAGAAGTGAAAAATTTCCAGGTTT  
CCCAGAGGGAGTGTGGGGCACCAGTTGATGGATCTTATGAAAACTCAAGCGCAACGTTTCGGTACGCAA  
GTGCTTCTAAGGACATCACCGCTGTTGATTTTAGTGTGAGACCTTTTGTCTTAAATCTGGAGAGGAGA  
CGTTTACCTGTGATGCTTGTATTATAGCTACTGGAGCATCAGCAAAGCGTTTATCTATCCCTGGGGCAGG  
AGATAATGAGTTTTGGCAAAGGGCGTAACAGCTTGCCTGTTTGTGACGGAGCCTCTCCCATTTTTTCGT  
GACAAAGATTTGTTTGTAGGAGGAGGAGACTCCGCTTTAGAAGAAGCCATGTTTTTGAATCGCTATG  
GTAAACGTGTATTTGTGGTTCATAGGAGAGATACATGCGAGCTTCTAAGGTTATGGTGAATAAAGCTCA  
GGCGAATGAAAAATCTTTTTCTTTGGAATAGTGAGATTGTCAAGATTTCTGGAGATACTCTAGTTTCGT  
TCTATCGACATCTATAATAATGTGGATTAAGACCACCACAACCATGGAAGCTGCTGGAGTTTTCTTTGCTA  
TTGGGCATCAACCCAACACTGCATTTCTAGGAGGGCAGGTAGCTTTAGACGAGAATGGATACATTATTAC  
AGAAAAAGGTTCTTCTCGCACATCAGTTCTGGAGTGTGCTGCGGGGGATGTCCAAGATAAATAATTAC  
AGACAAGCTATTACTTCTGCTGGTAGTGGGTGCATGGCAGCTTTAGATGTGCAACGATTTTTTAGAAAATT  
GAGCATTTATGTTTGGTGTAGGGATAGACATTATAGAAATTGATAGGATTCGGAATCTTATCAGACCTAT  
GGGGATCGGTTTTCTAAAGAAAATTTTTACGGAAGGGGAGCGGGTTTACTGCTTTTCTAAGTCCGAATCCCT  
ATGCCCTTTTTGGCAGCACGTTTTGCTGCTAAAGAAGCTGTAGCAAAGGCTTTGGGTACAGGCATAGGTAA  
GTTACTAAAGTGGAAAGAAATTTGAAATGCGTAGAGACTCTAGACAGCCTCAGGTAGTTGTTCCAGAGGCC  
CTATTATGTTTCTTAGGTGTGAAACGAGTCTCCTCTCCGTAAGTCATAGTCGCGAATACGCTACGGCTG  
TGGCAATTGCAAGAGTAAATCAGTAATAATAAACAAGAATATTTTTGATTTTAACTCTTTAAGTGATTTCCAGT  
GAGCTAAGCTTGTTTTGAACAGAGCGTAGCTAACAGAAGAACACATCAGAAAAGATAGCAGCGGTATTGT  
TGTAGAGCGATGCAACAAGAAGAAATAACTGACATGCTTATGATCACAACATACGTTTATAGATAAGAAG  
GACCTTTTAAATAAAAAGTCCACGGGGAAATTTCTTTAATGAGTAGCTGAGCATCCAACTCATGCTGTTTGA  
GCATGCTTTTACGTAAGATAAAGCGATGTTTGTATAGAGGCCAGGATCCATGCTATAGCAAAGAGCTCTGC  
CGATAGAACAAGAGAAAATTTGGTAGTGCAGGGCAAGATATAGAGATTTCACTAACAGTTTGTCTCCAGAA  
AACAACCACACAGCTAAGGGGATGCAGGCAATGCTAAACCTTGAATCATGGAGATCATCCATAAGTATT  
TTTTAGAAAAAGAGGGAGTATGCCAAAGCTTATTGATTAGAACAAGGGCTCTTGATTAATAAGCTTTGGC  
TTCGTAAGGATGAGGGACATATCTTGATTAGGATCCGGCGAGGAAGAGGTCTTTTATGTTGCGCTGTTTC  
AACATATATTGTGTTTTTTAGAAGAAGACCTTCGTTTGTAGACGTCCTCAAGAGCTTTCTTTTGTCAA  
TGAAGCTTTCTCTGGTCTATGCGTTGGGAAGTAGGTAAGATGCTAGGCTCTTACTTCTCTCTGTTAGGG  
ATATTTGGAGGGGGGTGTTTGTATTTTCGACGTTTTTTTGCCTCCCGCGGACATCTTCTAGCGGCAATT  
CGTCCATCAAGATTTTGGATCAACGGGTTTTGGCTTCAAAAACCTCCATCTATGTGATTAAGTAGCGAA  
CAAGACTTTAGTTGTTGCTGAGAGAGGAGAGCGAGTGACCTTATTATCTGAATTTCTCCGAATACAGAT  
CTTAATGAGCTAATACAGAAGGATCAAAAAAACCTTTCGACTTCTCGAGGGGAGATGCTTTTCAAGTTTCT  
TAAAGCAATTTAAAGAAAAGAAATAATCCCTAGAGGTTATTGGTAAAGAGAGAGCTTCTTTATGAGTTTAC  
AGAAGTTATTAGTTACAGACATTGACGGGACAATTACACATCAATCCCACCTACTTCATGATCGTGTGT  
AAAGGCTTTGCATCAATACTATGATTCGTTGGCAGTTATTTTTTCTAACTGGCAGATATTTTTCTTAT  
GCATATCCCTTTTTTCAAACCTTTTCGGTTCCCTTTTCTATTAGGTAGCCAGAATGGTCTTCCGTGTGGT  
CCTCCACGGATAAAGAGTATTATTTATTTTCGTAGCTTGTCTCGAGATTTTCTATGTGTTTTAGAGAAATA  
TTTTGAAGATTTAGATCTCATTGCCTGTATAGAATCTGGAGCCTCTAATCGTGATGTATACTTTCGAAAG  
GGATTAGGGAAAACATCTCAGGAATCAAGCGATTCCTGATGCTGTGATTTTCTTACACCAGAAGCTG  
CGGACTGCTGGTGGATGTTTCAGGGACATTTATCAGAAAGAAATTTTCTTATGAAGATTTTGCCATTGCCAA  
ATTTTTCGGTGAGAGAGAGGAAGTGAAGAAAATTATGGATAGATTTATTCATCTCCAGAAGTTTCTTCA  
CAGGTAACCATGAATTACATGCGTTGGCCTTTTTGATTTCAAATACGCAGTGCTTTTACTTACCTTAAAG

ATGTTTCAAAGGTTTTGCTGTAGATCAAGTTGTTTCAGACCTTCTATAAAGGAAT AAGCCTTTTATTAT  
GGCTTCTGGGGATGATGTCAACGATATCGACCTGCTATCTCGAGGAGATTTTAAAATTGTTATACAGACG  
GCTCCAGAGGAGATGCATGGATTAGCGGACTTTTTGGCTCCCCGGCGAAGGATCTTGGTATTC TCTCCG  
CCTGGGAAGCTGGTGAGCTGCGTTACAAACAGCTAGTTAATCC TTAGGAAACATTTCTGGACCTATGCC  
ATCACATTGGCTCCGTGATCCACATAGA GAGT TTTCTCCGTAATTGCGCTAGCTAGGGGAGAGACTAAGA  
AGGCTGCTGCTGCGCTACTTGCTCAGCTTCCATTGGAGAAGGTAGTGGAGCCAGTCTTGGTAGTAATC  
CACCATTC TCTCAATAAATCC AATAGCTTTTCTGCACGGCTAGCTAATGGCCCTGCCGAGATAGTATTC  
ACTCGGACTCCCCAACGTGCGCCGGCTTTCCAAGCCAGTACTTTTGTATCACTTTCTAAAGCAGCTTTTG  
CTGCGTTCATTCCTCCGCCATACCC TGGAACAGCAGCATGGAAGCAAGATAAGTTAGAGAGATGGTGCT  
AGCTCCTGCATTCATAATTGGGCCAAAATGAGAGAGAAGGCTGATAAAGGAGTAGCTGGATGTACTTAAG  
GCGGCAAGATAGCCTTTACGAGAGGTATCAAGTAATGGTTTAGCAATTTCCGGACTGTTTGCTAAA GAGT  
GAACAA GAATATCAATGTGTCCAAAATCTTTTTTACCTGTTCTACAACCTCCGGATACAGTGTACCCAGA  
AAGATCTTTGTAACGTTTATTTTCCAAAATTTCTTGAGGAATATCTTCTGGGGTGTGAAACTGGCATCC  
ATGGGATAGATTTTAGCGAAAGTTAGCAATTC TCCATTGGAGAGTTCACGAGATGCATTGAATTTTCCTA  
ACTCCCAAGATTGAGAGAAAATTTTATAGATAGGAACCCAGGTCGCCACAAGTATGGTTGCGCTGCTTC  
TGCTAACATTTTGGCAATGCCCCAGCCATACCC GTTATCATCGCCTATGCCGGCTATGAAAGCAATTTTT  
CCTGTAAATCAATTTTCAACATGAGCTAACCC CATTTTGTCTTCTTGAGAGAGGA GAGTAGCAGATTC T  
TTATTATTGAGAAACGGGCCTCATAATACATAAGGAGTAGATTC ACTGGCTGGATCCAGGTTTCTAGAGT  
AAA GAGT TTTCTTGTCAAATTC TTATATGGGTAGAGT TAATCAACTGTTTTCAAGTGATTTATGTTTATT  
TTAAAATAATTTGTTTTAACAACGTTTTAATAGTTTTAATTTTTTAAAGTGTGAAAAACAGGTTTTATATG  
TAGAATTTCTGTTAAAATAAAAAATCC TTACAA GAATCC GG GAGT TAAAGGTATGTCATTTGGTATTG  
GTAGTGCTTGTTCATCTTTATGGAGCCGTTTGTGTGGTTCATCAGGCAGTGA GGGT AACAGCGAAGAAG  
AGT GACGTCTTC GGGT TCAGACGCCGCTCAGGTTCTGGTGCTGCTTCTGCTGTATGCCAGCAACCTACG  
AGCAGCGTTCTACAGAAGGGAATGGTCC TAGTGACAGATACCAATGGTAGGGACGT ACTCAGCTAATG  
TGCAAAGCCTTGT GAAT CAGGGT CATGGCGGACGCGTTTCGT GAATAGATGCTACCAAAAATATTC TGC  
TAGTG GAGTAAGTCTTACATCTATATCCATTGGAGCGGGAGACTCTGT GGATGGCCGCTTCTTCGGTA  
GTAATT ACCCAACAGCCTCAAGGATCAGGATCC TCTGCAAGAGGTGCTGGTTCCTTACAAATGGGGCTG  
TGCTTTCTGGATGAGTACTCTTACTGGCAATAGTATTTTTGACTTGTTTGGAGAAT CTCAAATAACCAA  
TCTAATAGGCGATGCCGTTGATGGAACATCAACTTCTTCATCTCCATTGCGAGATGCAACC AAAGGAGCC  
TCTACAGCAGACCTTATAGCTCTGTTTCTTGGCTTTAGGAGGATCT GGATCTCAAGGTGTAATTC TCCGT  
TAGTTGCCACGTT ACTCAGCCGAT ACTCTCTTTCA GGATCGTT GGATGCCAAAAGCTCCAAGAGTTATT  
GGAAGCTTTGAAGAACTC CAAAATGACGCTCCACATC GGATGGAGCAAGACCTGGTCTAGGAGAGTGT  
TGTACGCATCTTTGTGGAGCATTATCTTCTTCCCCAATCCAATGTTAGCGCTGTGGGTATTGCTGGAA  
CGGGAT TGACGGAAC TCTGATGTAGCTGCGCAAAGCCAACGTGTTGAAAATGCGCGTTATTGTGTCA  
TGATGCTTGTAAAGCCTTGCTGCGCAAGTGCCTGT GGATATCC TCTTGC GGATGTGCTGACGGAGAAGGT  
GGCTGTGGAAGTTTGGAGCTTTAGTATGTAGTTGTGCCGAACATATGGTGCTGTCAA GAGTCTCCTGCGAG  
AAGAAGCAAATTTGGAA GAATATGCTCGTAAGCTTAAAGATTTAGAAATGGCTGTAGGTTCTACCACATT  
CATGTTGGGACTACATAATTTAG GGATTTCTTTCTCTGATCTAGTAAAAGGAAATTTACCAATCTGCCT  
ACCC CAGAACAAC TAGAGACGGCTTGTAAGACGCAGTTTCTAGCCTTGGGAAGTTGATGATGCGTATAA  
CTCAAGAGAAATGGTTGGGACGCC TTTGCTCTTGTGCAG GAATTTTAGATAACCCCTTCTGGAAAAGAGC  
TCTTTGCAGCGGAT TAGCAGGCGGTACACATATGCTGTCTCTTCAAGATCTAACATCTCGTGTAAAGTT  
ATTACATCTTCAGGCAACAAGCAAGAAGCTGA GAATTTAGATCTT GAATTAATAATGCTGCTTTGTCTA  
GCTTGCAGGTGACAGGAACAGAAGA GGATTTGTGATGACGAAGGTCAAGGGCTAAAATACAGACCAGTTGAC  
CATGCTTCTTTGTAAGTTCTGCTCAGTTCTCTCCGAGCTATAGGAAATGATCGCAGACCTATTTGGTTA  
ACACCTAAACAGATAACCGAGATCC TATGCGTCTGCATGGTAAT GAGTGGTATTTCAATAGTTGGCGGAC  
CTTCTAATCAGAGT GCG GAATACCAAGAATTC CAGAATACAGTCATGCAAGAAAGTTTAAACGCATTTGCA  
ATCATCC TTGAGAGT TTCTAAGAGAACAACAACAGAACTC GAGCAGAAGTGCCTAAACTGGTTGTGAAA  
TATGAGGCACAAAGTTCTTTCTTATCC CTATTAGA GGGTCTAAGAGATCC AAAATAGCAAAGAAAGTAAAG  
ATCTTATGAGA GAATGCTTCGCTTCTTGGGCACAGAAAGCAGGTGTGCAAAGCTCCTCTATCTAGAAGTA  
CTTTCTTCCCTAGTATAAAGCCCTTTCTAATCAGCGGAGGGCTTTATATAATGAGACCGAGCTTCCC AT  
TC TAAGCGGAGGCTCGGTCTCTTTTTTGTATC GGATTCATACTATTC TTTTGTACTAC GAGTCTTTAGCT  
TCCAGAACTACTTGTATTAAGACAAC TTTGTTTTATTGGAGGCTTTTTAAGAGGTTAAGGCCTAAAATCT  
GCGTAAAAA GGGTAA GGGTCTTGTGATGGCGTTAGAGAGGAGATTTTCGATTTTTTTCATTGGAGAAAGGAG



AAATGAAGGCTAAGCTAGCTGCGTGAAGCAAAGTCCGCACAACATTC TTTGGCTGTTCTTGATTTCCGTA  
ATCCACATCCCAACAATAAGGATGGCCGATTGTTTCATATGTAAGCGTATTTGATGGGTGCGTCCGTGA  
ACGGGGCGGCAAGAAGTAAAGTGTACTTGGGATAGCGGGTAA GAATCTCCCACTTGGTAATCGTTATTT  
TACCGGAATTTTGAATCCGTATTTCCAATAATACAGCACCAGTTCGACGGTAGCAGGGGGCTGTATAGGT  
TGTAATGATTCAGATTC TTTGGCGTGGTTGTCCAAATACTAGAGCAATATAGCGTTTATCTATTTCTCGA  
TTC TTTGAATAGTTGTGTAATAAGAGAAGAGGCTTTTGCATGTTTCGCAAAGA GAATACACCC TGATGTAT  
CTCGATCTAAGCGGTGCACAAGATGAACATTGAGCTGATGAGCCAAATCC TCGGAAGTCTGTTTAGCAGG  
TTTATTTGTAATACAGAGATGCTCATCC TCCCAAAGTAATTGTGGAGAA GAGTGTTCGATGATTTGTAAA  
CTTACTC GGTCTCCGGGCTGCAGCTTATAGGATTC GAAGCGTTCAATGCGACCATTGACTC GGCAACCAT  
GATAGCGAACGGATTC TAAAATAGTTTTTTTAGGCAGATGAGGCAGAGAAGTCCGGAGAAAAGAAGAGAG  
CCTTATGTGGCGATCC GCTGTACCAATAAATTC TTGCATAATCC ATTATCGATAAGTGTGTTGGTACGAT  
TTTACGAGAAT TTTCTATGATAAGAACAGCTTTTTTCCAAGATAAA GAGTGTTTTCCCTCTGGAAGCTTTAC  
GTTTCATGGTTTTCTTGAAAGTAAAAGATCGTTCCCTTGGAGAGATTC TCCGACTC TTTATCGGGT TTTGGGT  
TTCAGAGTTATGCTTCAACAAACTC GAGCAGAAGTGGTGGTTCCGTATTTTTTTGAAGTGGATGGAAAGA  
TTC CCGACTTTACAAGATCTTGCGCAAGCAAGAGAAAAGCGATGTGGTGCAGCTTTGGGAGGGGCTGGGTT  
ATTATTC TCGGGCTAGGAAC TTGCTAGCCGGAGCTCGTGTATTACAGAGATTTTCGGAGGAGAAAATCCC  
AAACGATTTAGCGCTTCTTAGCTCCATTAAGGGGAT TGGGTCTTATACAGCAAATGCTATCC TTGCATTT  
GCATTTAAGCAAAAAATCC TGCTGTTGATGGGAAT GTTTTGCGTGTGATGAGT CGATTATTTGCTATAG  
AGGAATCCATCGATCGTATGAACACGCGAAGAGAGATCACAGGGCTTTGTGAGAGT TTTGCTTCCAGATCA  
GGATCC TCAAGTCATAGCAGAGTCTTTTATC GAGT TGGGAGCAA GAATTTGTAAGAAACAGCCTCTTTGT  
GAACAGTGTCCGTTGCGTTTCAATTTTGTACAGCATATCGACAAGGGACTATGGAACAATACCC TGTCAGAA  
ATACACGAGCAGCTATTTCCAGGTTATTTGAGCTGTTGTGATTGTTTTGTATAA GGATCAGGCTTTGAT  
GACAAAACGCGAAGAGAAAAGAGATTATGGCAGGTTTGTATGAGT TCCCTTACTACCAGCTTCCCAAAGAA  
GATGTTGTGATATTGAGAAAATCATTCATCTTGTTCAGAAAAGATTATGGAGAGACGCTGCATTTTGTTA  
GTAGCTTTCCTTCTCAAAGCAGGTATTTACTC GCTATCGCGTTACACTATTC CCACATGTTTTCTACAC  
AAAATATAGTTTACC GAATAGCTACACGTTAGCAGAGCTATCAAGTCTCCCAAGCTCATCAGGACATCGC  
AGAAT TAAAGAGACTTTTTTAGTC GAGTATCATAAGTCTTTGGAAAAAGATGGTAAGCTGTTCTGGAGAT  
AAATAAAAATAGTCCGTAGTCTTTTTTCGACTC TTTGCAGCAGAGGTTTTTTTTATATGAACGTTTCAGAC  
CTTCTCAATATTTT GAATGAAGTGTACATCC TGAATATTTTTAGTGACTATGGCCCTAATGGTTTACAAG  
TTGGTAATACACAAACTGCGATTC GTAAGGTGGCGGTTGCAGTCACAGC GGATTTAGCAACTATTGAGAA  
GGCAATAGCTTGCAGGCAATGTTTTGCTTGTACATCACGGGATATTTTGGAAAGGGGATGCCCTATCCC  
ATCACAGGGATACTC TATCAGCGTATGCAACGCTTGATGGAAGGGAATATTCAGTTGATAGCTTATCATT  
TACCGTTAGACGCGCATAACAAGATTGGTAATAACTGGAAAGTAGCAAGGGATCTAGGTTGGGAACAAC  
AGAACTTTTCGGAAGCTCTCAGCCTTCTTTAGGAGT TAAGGGAGTCTTCCCAGAAATGGAGGTTTATGAT  
TTCATATCTCAATTATCTGCATACTATCAAACACCGGTATTAGCGAAAAGCTCTTGGAGGAAAAGAAAAGAG  
TTTTCTTCTGCAGCGCTTATTTCTGGCGGGGCTTATCGTGAAATTTCCGAAGCTAAAACCAGCAGGTTAGA  
CTGCTTCATCACTGGTAATTTTGTATGAGCCGGCATGGTCTTTAGCGCATGAGCTGGCTATTCATTTTTTG  
GCTTTTGGACATACAGCTACTGAAAAAGTTGGTCCAAAAGCCTTGGCTCAATATTTAAAAGGAGCGGGTT  
TAGAATCAGTTGTGTTTTTGGATACGGACAACCC TTTTTAATTAAGAAAGGCTCTATCGGAATAGCAACT  
CTTTCATAAAACCC TCAAGTTCATTGGTAAGATTC GAAGGAAATGCTCCTCGTTTTTTTTAGATAAGAGTA  
ATC GGATAGAGAA GAATTTGAAGTATGCTCGAGCCTGTTTAGAAAAGAGGACGAGCGATATCTCCCGAAACA  
TTTTGCGTGATAAAA ACTC TCTTCCACGATGAGATACAGTAAGGCTCTCGCAGTTTCTCCTAAAGTTGGTA  
GAGGAGAACAAAGATAAAGACCC TCTAAATTCGAGAGACGGCACAGGTGTAGTAGGGATTTCCCTATAGTT  
GTTTTTGTATGCCACTGACTCTCGTGTGTGTACATAGACAACGTTAATGAATACGGGGATTTGTATCAACA  
GATGACTCAAACGTGTAAGAATGAAACTTTGGTCAGCTCATTAGAATGATTGATAAAGCTATCC CAAAAGA  
ATGACCAGTTTGTCTTAGAAGATCC TTCGCAGGG GAATACAGTTAGAGATGTTCCCTTGTAGGAT TACATC  
AGAAATATCGATCTTTTTTCGAAA GAATCATGGTAACAATAGAGTACTTGAGACTCACGTACTCAATTTCT  
ACCGCATAGGGATACTTATCGGAAGAAAAGAGGAT TGTGGATACATAAATGGCGAATCTTCGTTTTGGAAA  
GACCGGGGGAATATTTGCCAACGGTCACTTGAGCATGCAACTGTTGGGATAGCCACTGCTCAACAATACT  
TTCTTTTTTTATCCAGAAGTACCC TACAATACAACAGGCTATGAGAAATGCGCTCTTGATTAGTTTAAAC  
ATAGAAAAGGATGGTCGTAAGCACTAGATGTTTACGATAGAGGAATAGAGAAATATTAGGAATCTAAAAA  
AAAGCCTCGTTCTTTTGGGAAACGAGGCTCGAA GAATCTATTTGTTCCATTAGAGGAATTAATAGTCC  
ATTCCTGCGCCAGGCATTGCTGGAGCTGCAGCAGGTTTTTCTTCTGGAATCTCTGCAATGAGAGCTTCTG

TTGTCAAAGTAATCCAGCTACGGAAGCCGCGCTTCTAAAGCAGAACGGGTACTTTAGCAGGATCTAA  
AATACCAGCTTCAAGCATATCTGTGTATGCATCACGCAATGCATCATATCCTTCTGTTTCGAGAACGGGAC  
ATAACTTGTGGGAAGATGATAGCACCTTCTTTTCTGCGTTTGCAGCAATTTGTTTCAAAGGAGCGGAAA  
GAGCTTCAAACAATGCGAGCTCCAATTTGCTCATCTTCATTAGTCAACATTGGCAAGAAGGCTTCAAG  
AGTAGGGATACAACGGATTAATGCTGTTCTCCACCAGGAAGAATTCCTTCTCAACAGCAGCGATTGTA  
GCATGTTGAGCATCGTCTACACGATCTTTTTTCTCTTTCATCTCAATCTCTGTTGCAGCTCCAACGC  
GAA  
TGACTGCTACTCCACCAGAGAGCTTAGCAAGACGCTCTGGAGTTTTTCTTTATCGTAATCAGAAGAGCT  
GTCTTCAATTTGTTTTTGTATGCTTTCGCAACGAGCTTCTAAAGCTTCTTTTTTACCATTCTTCGACG  
ATGGTCGTGTCTTCTTTAGAAACGATAACTTTTTTAGCTTTACCTAACATAGCTAAGTTAGCGTTTTCTA  
ATTTTCATGCCCACTCTTCGCTAATGAGTTGACCGCCAGTTAAGATAGCGATGCTTCCAACATAGCTTT  
TCTTCTATCTCCAAAGCCTGGAGCTTTAACTGCGCAAACCCGGAATTCCTCACGAATTCGTTCACGACC  
AAAGTAGCTAAAGCTTCGCCTTCAATGTCTTCTGCTATAATAAGAAGAGGACGGCCGGATTCAGCAACTT  
GTTGTA AAAACAGGAAGGAAATCTTTGATCCAGAAATTTTTCTTATCGTAGATTAGAACC  
AAAGCGTCTTC  
TAATACACATTCCTGAGTTTCTGGATTTGTTGCGAAGTAGCTAGAGAGGTAACCTCTATTGAAATTCATT  
CCTTCAACAACATCCAAAACGGTTTCAAATCCTTTTGCTTCTTCAACAGTGATAGAGCCGTTTTTACCAA  
CTTTCTCCATTGCTTCAGCAATCAGATTCCTCGATTCTGCATCATTATTAGCAGAAATGTTGCAACTTG  
AGCAATTTCTTTATGATGCTGAACAGGCTTGCTGATTTTTTTGACTTGATCAACAACAACCTAACAGCT  
TTATCAATACCTCGTTTGGGTTCCATTGGATTTGCTCCAGCTGTTACATTGCGTAATCTTCTGTATAGA  
TAGCTTCAGCAAGAACAGTAGCTGTTGTAGTTCCGCTCTCCAGCTTTGTCAGCAGTTTTGCTGGCGACTTC  
TTTGACCATTTGAGCGCCATATTTTTCATGTTTGTGCGCAAGCTCAACTTCTTTCGCAACGGTAACACCA  
TCTTTAGTTACTTGAGGGGATCCGAAGCTTTTTATCTATGACAACATGTCGTCTTTAGGCCCTAGAGTGA  
CTTTTACAGCTTCAGCTAAAGTCTTAACTCTTTTTGAATTTTCTTCTGGCTTCTTCGTTGTATTTAAT  
GTTTTTAGCGACCATTGATGCGCTCCTTAAATCTTACTTCACTCTCTTAGTTTTTATTCAGAACTGCGA  
TAACTTCGCTCATTTGAACGATGACGTACTCTCACCTTCGACAGTGAGTTCTTGCCAGAATATTTATC  
AATTA AACGATGTCACCAACCTGAACTTCAAAGGAAGTTGCTGCCCTTATCATCTTTTTTTGCCTGTT  
CCTAGAGCTACAACCTCAGCTCTATCTTGCTTTTTTCTTGGCAGTGTGAGGAAATGATTCCGCTCTTG  
CAGTGGAAGCTTCTTCTCTCTTTTAACTAAAATTCATCTCCCAAAGGTTAATCTTGAGGGTCTGTTGC  
TTGATCTGACATGTTTAAAGCTCCTCGTATTTTTTATATTCATGAGGCCCCGTTGGTCCGGCTTTGTCCGC  
TACCAACGTAGGGATTTGAACGATAGAACGTTTCAAGGAAGAACGATAGCAAAGTCTCGCTTTTTTGC  
ACTGGTTTAGCAGTTGGCATGATCAACTGCTATTTTTTAAAAATTTATAGCAAGCTAGCTAGTTCTTCCAG  
CTTCGTTTCGATGTAGGAAAAGGCTTTAAGCATAGGAGCTGATGAGGTCATATCCATCCAGATTTTTTC  
AAAATTTGATAGGGAATTCGGATCCGCCGCTACGCAAAAATGTGAGATATGCTTCTTGAGCACCTTCTT  
CTCCAGAAAATTCCTTTCAGAAAAACACAACGATGCAATGATTCAGTGGCGTATTGATAAACATAGAA  
GTTGTAGTAGAAAATGAGGAATGCGAGCCCATTGATACAGCTATGTTTCATCAAAAGTTATGCAATCGCCA  
TAAAATAGGCGCTGCAGTTTCTCGTAACTTTGAGAAAAATTCATTGAGTTAATGGGAGACCTTGTTCGG  
CTGCAGAATGCATTTCCAGCTCAAAAGCAGCAAATAGTGTGTGCGGAATAAAGTTGCAAAAACAGTGTC  
TAGAGAGCGAGAAAATAGCAATCTTCTCTTCTTCTTAGACGGAGCTGTTTTTAGCAGAAATTCATCAAT  
AGGGTTTCATTGAGGGTTGAGGCGATTTTCACTAGAAAAATTCGGATACTGAGCTTCATGATAACTTTGAT  
GTTTATGACTCAAATGAGTGCATACTATGACCACCTTCGTGCGCAACTACCGATAACGTCGTATAACGT  
TCCTGTATAATTGAGAAATGTAAGTTTGTGTTATAACACCCAGACGAATATGTCCTGAGCGTTTG  
TTAGTATTTTCATATTTATCTACCCATCCATCGGAAGTGAGACCTTTGCGTAGAGTCTCTACATAATCGT  
TCCCTAAAGGGGACAAGCTATCGCAGATCAGAGTGACAGCTTCTTGATAAGAATAATGGCGTGAAGCTTC  
GCTAGCGACCAACGGTGCCTAGACATCATAGAAATGGAATCTGAGAGACCAAGAGCTTTTTTGTTTTAA  
TGAAAATACTTAGTGATCAGGTGTGTGTGTGTTTAAACGGTATCAATGAGCGTGGTAACACAGAAGTGC  
TGATATCAATTCGAAATAGTGCTGCTTCTAAACAAATGATAATCGCGAGCTTTTGCATTGAATAGATG  
GGCTTGAATTTTGCCATTCAGTAGATTCGCGAGAGATAAACGATACCCGTGATGGCGTTGACATTTGTTT  
TGATAAGTGTTTTTGCGTAGCTCCCGATCTGTAGATTGCATGTATAGAGAAGCTAGAGCGTGAGAAAGG  
GATGAGATTTACCTTCGGAGTCGACAGCTTCCCCAAAAGGAATTTCAATGAAATCTGTTAAGCTACAAAAGT  
TTTTATAGGCTACTTCCAATGCAGGGAAAGAAGACGCTAGGATTTTTCTTCTCGAGAAGTTCTGTGTGC  
GGAGCTAAACGGAATAGTTTTTTCAAATAGAAATGGTATTCCTGAAGTTCCGGGAGAGGCTAATAGCATAT  
TAGCCACTTGCTGAGGGAGGGCGATAAGGGCCGGTTGAATCCAAAGAAATTTCTCTACAAATGATGTGAG  
CAAGAAGGTAATAGATTTTCAGATCAGCTGCGGCTTCTTGATTCGCAATATCCATCATGAGTAAGATGA  
GCGTATACATAAAGTTTATCCAAAGTTCTTTCAAATAGAAAAGACTGTGGTTAGCAGCTCACGAAGAGAAG

AAGGTTGTTTTATATCAAATTGTTTTTCGCTAAGGTGAGGCCAAAATGGAGCTCCTTCAGCACCTACTTT  
TTTTAATTCGTCTTGCCAGACTTCACGACTCGCATACAACTTTTCGTATCCAGCAGTCAGAAAGAGGA  
ACATCTTTTCTAGAGCGTAAAGCTGTTTGTGAAGTAGTAGCAGTGGTCATGAATCTCTCCTTAGAGGAAG  
CTGTTTATGCTTGTGTCAGCTAAATCATCAGCTCCTTGTTAGGATAGCCAGTAAGGAGAAGAAGATTAG  
CTGTTTCTTGATCAAAGAGAGCAGTTTCGATCAAGATCGATTTCTAATCAAGTTTTTTGCCTGTAGTTTT  
CTGTGATCAAATGATCTTAGCTCTTTTATTGACTGTAAGAATTAATCTGTATGGATATAAGGTCGTCT  
TTATTGATCGATGTGATTGGCAAGCCTTCTCAGATTGATAGCCTTTGTAACAGGTGTGATAAAAAGTATT  
TATGGAGAAATTTTCAGATGCAGTAAGCGAAGCCTTAGAAAAGGCGTTTGGATTAGCTAAAAACTCTAAG  
CATTCCTACGTGACAGAAAACCATTTGCTGAAAAGTCTTTTGCAAAATCCAGGCTCCCTATTTTGTGG  
TCATTAAGGATGTGCACGGTAATCTTGTTTTGCTTACTTCTGCTGTGGACGACGCCTTACGCAGAGAACC  
AACTGTAGTCGAGGAACCGCTGTTGCTAGTCTTCTCCAAGTTTACAGCAGTTGTTGCTCAATGCGCAT  
CAAGAAGCTAGAAGTATGGGTGACGAATATCTATCAGGGGATCATTTGTTACTAGCTTTTTGGCGATCGA  
CTAAAGAGCCTTTTGTCTTCTGGAGAAAACTGTAAAACTACTTCTGAAGCGTTGAAAATTAATTAC  
TAAATTAAGACAAGGAAGTCGTATGGACTCACCTAGTGCTGAAGAAAATCTGAAAATAGAGAAATAC  
TGCAAAAATTTGACTGTACTTGCAGAGAAGGCAAGCTTGATCCGTGTGATTGGTCGAGATGAAGAGATTA  
GACGTACGATACAGGTTCTTTCTAGACGAACAAAATAATCCATGTTGATAGGGGAGCCCGGATTGG  
GAAAACAGCAATCGCTGAAGGACTTGTCTTTCGCATAGTGCAAGGGGATGTTCCAGAGATTAAAGGAA  
AAGCATCTGTATGTACTGGATATGGGAGCTTTGATTGCAGGTGCCAAGTATCGAGGAGATTGAAGAGC  
GGTTAAAAAGTGTATTGAAAGATTGTAAGACTTCTGAAGGCAGTGTATCCATTTCATTGATGAAGTGCA  
TACTTTAGTAGGAGCGGGAGCTACAGATGGAGCTATGGATGCAGCGAATCTATPAAAGCCTGCTTTAGCA  
CGAGGCACCTTGCATTGTATTGGCGTACGACTTTGAATGAATACCAAAAATATATAGAGAAAGACGCGG  
CTTTGGAACGGCGTTCCAGCCTATTTTTGTAACAGAACCCTTCTTGGAAAGATGCTGTATTCATTCCTCCG  
GGGTTAAGGGAAAAATATGAAATTTTTCATGGTGTGCGCATTACAGAAGGGGCTTTGAATGCAGCTGTA  
GTTCTTTCTTATCGTTACATCACAGACCGATTTCTTCTGATAAGCGGATTGACCTAATTGATGAGGCTG  
CGAGTTAATCCGTATGCAAAATAGGAAGTTTACCTCTGCCTATTGATGAAAAGGAAAGAAATATCAGC  
TTAATCGTGAAACAAGAAGCTATTAACCGGAGCAAGCACCAGCTTATCAGGAAGAGGCTGAAGACATG  
CAAAAAGCAATTGACC GGTTAAGGAAGAGCTGGCCGCTTTACGCTTTCGCTGGATGAAGAAAAAGGAT  
TAATTGCAAGGATTAAGAAGAAAGAAATGCTTTAGAAAATTTAAAATTTGCCGAAGAGGAAGCTGAGCG  
TACTGCCGATTACAATCGGGTAGCAGAACTACGCTATAGTTTGATTCCTTCTTTGGAGGAAGAAATTCAT  
TTAGCTGAGGAAGCTTTAAATCAAAGAGATGGGCGCCTGCTTCAAGAGGAAGTTGATGAGCGGTTGATTG  
CGCAAGTTGTTGCGAATTTGGACTGGAATCCCTGTGCAAAAATGTTGGAGGGAGAATCTGAAAAGTTATT  
GGTGTGGAGGAGTCTTTAGAAGAAAAGGTTGTCGACAACCTTTCGCTATTGCCGAGTCAGTATTCG  
ATTCGAGCTGCTCGAGTAGGATTGAGTGATCCGCAGCGTCTCTAGGAGTGTTCATTTCTTTGGACCTA  
CAGGAGTAGGGAAAACCTGAGCTTGCTAAAGCATTAGCAGAGCTTTTATTTAATAAGGAAGAAGCGATGAT  
TCGGTTTGACATGACC GAATATATGGAAAACATTCGTTTTCAAATGATAAGGATCTCCTCCAGGGTAT  
GTAAGGATATGAAGAAGGAGGGAGTCTCTCAGAAGCTTTAAGAAGACGACCTTATTCGTGTGTTCTTTTG  
ATGAGATAGAAAAGCAGATAAAGAAGTATTTAATATTTTATTGCAGATTTTGTGATGATGGGATTCCTAC  
GGATAGCAAGAAGCGTAAGGTAAATTTGTAAGAATGCTCTTTTCATTATGACATCAAATATTGGTTCCGAA  
GAGCTTGTGATATTGTACTAAGAAAGGAACCTATCGTAGACAAAAGAAGCTGTGTTATCTGTTGTTGCC  
CTGCGCTTAAAAATATTTTAGTCCGAATTTATCAATCGTATCGATGACATTCGTCCTTTTCGTTCCCTTT  
GACTACGGAAGACATTTGAAAAATGTCGGTATTCAAATGAATCGGGTTGCTTTACGTTTGTGCGAAAGA  
AAAAATTCGTTAACTTGGATGATTCCTTAGTGCTATTTCTCAGTGAGCAAGGTTATGACAGCGCTTTTG  
GAGCTCGCCCTCTGAAGCGTTTGATACAGCAAAAAGTAGTGACTATGTTGTCTAAAGCTCTTTTGAAGG  
AGATATCAAACCTGGAATGGCGGTAGAGCTTACTATGGCAAAAGATGTAGTTGTGTTAAAAATTAACA  
AATCCAGCTGTGTAGGACGTTTGTGTGTTTGCGGCATTGGATGTGCTTTATTGGATAGGCAGCTTCTG  
TTACCGACCGCTCTGCGAGCGACTGAACGGATGAGAAAGGAGCCTATCCCGCTCCTAGATAAGCAACAAA  
GCTTTTGGAATGTAGATCCCTTATTGTCTGGAATCTATATGCGCTTGTTTGTAGCGCATCGAGATCCCTT  
GAGTGCAAAACGGTTAATGTATCTGTTTCTCAGCTCTCAGAAGAAGGATGTATCTGTTTTGCTCGATGC  
ATTTTGTCTTCAAAGCGTCCGAATACCTTTTTCAAATCGGAGGAAGAGCTCTTTGCAAAATGATTT  
TGCCAAAGGTTTCTCTAGGTGTTTCATCGGGACGATGATTTAGCGAGATTGTTGGTGTAGCGGAGCCTTC  
TGCGGAAGAGCAAAAAGGCTCGATACTATTCATTGTATCTGGATGTTTTAGCTTTGCGTGCATACGTTGAA  
AGAGAGCGTTTGGCGAGTGTGCACACGGAGATCCGAGCGGATAGATTTGGCAACCATAGAAGCTATTA  
ATACCATCCTTTTTCAGGAAGAAAGATGGAGGATCCCTCAAACAAGAGATGTTTGAAGCAGGTTTTTC

TGAGTTAGCTGCTGTTACAGATAGTAAGTTTGAGTTTGCTTGGGAAGCTGTAGTGCTTTATCAAGCTGTC  
GCCAGCGGCTTGATTTGTCTCTGGACCCGTGTCACCCCTCCTGGACATATTTACTTACGCTATAAGGACA  
AGGTAAATATTGAAACCACTTCTGGAGGAAGGCATCTCCTACTGAAAGGTATTGTTGAATGCATAAAAGA  
GTCGCAGTTAAAGGTGCGTTTCGCAGATGGAGCTTATAGGGTAACTTTTATGAATAGAGGAGCTTTCTTT  
TTGCAAAAAGGAGAGTTTCTTCAGGCGTCCTTAGCTTATGAGCAAGCTCAATCATATTTATCAGACGAGC  
AGATTTCTGATTTGTTAGGGATTACTTATGTTCTTTTAGGAAAGAAGCGGGGAGAGGCTCTTTTAAA  
GAAATCTGCAGAAAAGACTCGGCGAGGGTCATCTATCTATGACTATTTCCAAAGGATATATTTCCCCGAA  
ATCCTAGGGGTGTTGTTTGCCGATTCAGGGGTGACCTATCAAGAACTTTGAGGATATCGAAAAAACTAG  
TGATGCTTTCCAAGAAGTATCCAAAAGTGGATCTCTTAGGTTGAGGTTGGCGACAACAGCATTGGAGCT  
AGGGCTGGTTAAGGAGGGGTGCAGTTGTTAGAAGAAGTGTAAAGGATGCCCCAGAGGACCTCTCTTTA  
CGTCTGCAGTTTTGTAAAATTCCTTGAATCGACATGATTATGTCCGAGCAAAAATATCATTTTGATCAAG  
CGCAAGCTCTTCTCATTAAGAGGGGTGTTTTCCGAAAAAACTTCTATACTCTCTTAAAAACTATCGG  
GAAAAAGCTATCTCTTGTGCTCCGAGTTAAACGGAGCCTTCTAGCTATTTTGTAAATATTTTAACAATT  
TAGATTCTTCAAAGCTCAGCGAGGGCGTGAAAGAACTTGTTCAGGTTGATTTGAAAAAAGTTTGTTTTAA  
ATAGTTTTTTTTAGTTAAAATGGGTCCCTAAATAATTTAAATCCGGTAGTTTTTGCCTCCGAAACATTGTT  
TTATAAGTGAGAAATGAGATCTGGCTAAAATCTGTGCAAGTGAGGTTTATGACGAAGGTTTATGCGCATA  
GCATTCAGCAAGAGAAGTGTGGATAGGATAGCTCTTTTAGAGAGATGCTTAGATCTGAGTAATTCATT  
GCCGACAGCGAAAAGATTGGCGGCAGTTGCTGTGGCCACTATATTGGCCATCGCTCTTCTAGTTGTTGCG  
GGCTTGTGTTCTCTGAGTCTCTGTAGCCCTGTTTCTGTTGTAGCGGCATCTTTATTCCTCGGGTAG  
GAGCTTTCCTTTTAGGAGGAGCTTTGGTTGGAGGAGTCTGACTACAGAAGCTGTGACTAGAGAGCGGTT  
GCATCGATCACAACTTTGATGTGGAACAACCTATGCTGTAAAAACAGCAGAGGTTGAGCAGAAAATCTCG  
ACAGCTAGTGCAAAATGCCAAAAGCAATGATAAGCTCGAAAACCTCGGTGAGTAAAAAAGGGGCGAGCTAAA  
GGCGAGTCCGGTTTTAAAGATTAGCTTTCATTGAGAGGCTGTTTTAAAGAGTTTTTAGGAGGCTCTATGGA  
ATCGCTTAAACAGTTATGTAGAAACCATCTACGTTTAGACAACCTGACGGATCCGTGCGCTCGGTGTTG  
ACGAAAGGAACAACCTGCAGAAAAAGTTAGCTAGCAGCATGCTGTTTAGGAGTTGTTTTGTTTCGATTATTT  
GTTTAGCTTTGGGAATCGCTGCAGCGGCAGTGGGTGTTTCGTGTGGTGGATTTGCTCTTGGATGGGTAT  
TATCGCCATTCCTTTAGGGATGTTATGTTTGCACATCTGCTTTGGATGTTCTAGAGAATCATGTTTTG  
GTGGATGTCCATTTAAGTTGCCATGCAAACTGAGTCCAGCTAATGAACCTGCTGTACAATTCCTTAAAG  
GTAAAAATGGAAGCGCAGACCAAGTATTTAGTAACTCAATAAGACAATGGGAGACGTGATGATACAGA  
GCGTGAAAACAGAAAGTGGGTAGTTGATGGTCATCACGGAAGCTGTGATTCCTTTGGGATGTGTGGTGGG  
AGCGCTAGCTAAAGTTGCGAAACTCTAGTGTCTCTCGCCGCTCTTGTTTTTGAATGGGGCTTTGTGTGT  
CTTCACTGGTTGCTTTATGTGTGGGAGCTACTCTGTAGGGCTTTAGCCGTTTTAGTAGCGACAACAC  
TGGCGAGCTTCTGTGTAGCTTATGTTTTGTTTATAGCTGCTAAAGGATCGGGGATGGATCGCTTCTAC  
AAATAAGTGCTAGGCAAAACTCGAAAAGCAGACTTCTCTAGGCTGCTAGCTTTTTTAAATGACAAGAAA  
CGAAATTTGATAAAGGGATAGGGGGATACATGATCTGTTGTGACAAAGTCTGTGTCGAGCGTACAATCAAT  
GCCTGTTATAGATAAATGCTCTGTAACGAAATGCTTACAACGGCTAAGCAAGCAGTTGTTCTTGCCTG  
TCTTTGTTTGCCTGTTTGTCTCAGGAAGTTTATCCATATTATCAGCGGCGGTACTGTTTAGTGGCACTG  
CTGCTGTTCTCCATATCTGCTGATATTAACAACAGCTCTTCTAGGATGTGTTTATGCTGTTATTTGTCT  
TTTTAAGAAGTTTATCAGCAGTTGTTCAAGTTGTA AAAAGAGATCACCTGAAGAAATTAAGGGGCTGCT  
CGTCCCTCTGATCAGCAGGAATCAGGAGGACGTTTGTCCGAGGAGAGCGCTTACCACAAGCATCTCCTA  
CTTCGCTACTTTGCGTCTTGAATCCGCTTTTCGCTCAATAGGAGATAGTGTTCGTTGGGATTCGATGA  
TATAAATAAGGACAACAGCCGTTCTCGATCACGCTCCTTCTAAAGGATGACATGTGATTCGCGTAGGAAAA  
AGAGGAGGGAGACCTCCTCTTTTTTTTTATTTTGTAGAGTTCCGTTACTATTGGCACCCCTGTGTGCAGTT  
AGGATGAGTAGACTAGTTCTGCAGCCTTTTACAGGGTGTATGTTTGCATTGCAAAAAGCTCCTAAGAC  
TAGGAGCTTTTTGTAGAAGGTGATGCAGACTTTCTGGGGGAGGAGAGCGTCTCTCTTATCTGGGAACACA  
GATCTGAGCTCTCTTTTCGTTGTAATGCAATTTGACTGGTAAAGAGTTTTAGAAAAGTTGTGAAAGTTGTCC  
AATTCATCTCGTAAGCTATCACGAATGTTTTTAATTCCTTCAATAGCCGCTGTTAATGATTCCTGGTTA  
TGCGCTAATCGGCGAATCTTCTGCTAATGGGGTTAGGAATCGGATTTCCCTCTCTTAAATGAGGCAACAG  
AGCCTTTAAGATCTGCTATGATTTCTTGCAGAAAAGAGTTTGGCATTCTTCTGTAGAGTTTTTATACTC  
ATCCAAAAGAGATTCAAAACCTTTATAGTTATCTCTAAATCCCTTGCAACAAGAATAAAAATCTTGAGAT  
ACAGCAGAGAGGCTTTTAGATGTGCTTGCAAAATTCCTTAGATAAATGAAGAAATTCCTTCTGTAGAACGC  
TCAGCATGAAATTAATTTCTTTTAGAGACCCAACTTCTCTTTGCAGATCCCTGGTATAGATGTAGATTAGC  
GGTTTTCTGTAGATAAAGAGCATTCCTGCTAATGAGGTAATGAATAGGGCAAGAAGAACAATAGTGATT

TGTGGAGCGATCAGAAAGCCAACAAGATGTCCCAAAGAGCTAAAAAGCCTATTGTGCCTATAA**GAAT**TA  
GGGAGGCAATGGCTGCTATTTTCTTAATTTTGTCCATCAAAGAAGGTTGAGGTACGCGATTGGCT**GAGTA**  
GGAAGGTGCAGGGGAGATGGAG**GAGT**CACGATTA**GAGT**AGGCGTTGTCATAGGCACTTTCTCATTTAAA  
GTTCTCTGAAACCAG**ATCC**TAGGGCTTTATATGATAAAA**ATTC**TATGTAAAAACCAGCTTACATGTATTT  
CTAAAGCATTTCATTAATATTGTTGACT**GGAT**TAACGATCAATTTCTGCATATAGGACAG**GAGT**AGAACA  
TGTTGCATTGGCGATACGAAAGCACTGATTGCTATGGAG**GGATTC**AAGAAA**ATTC**TTGTCTGCGCAGTGC  
A**GAAT**CGCTTTG**GGGT**GTGCCTGTCGTGAAATGTATGTAAAGAGAAAAGGA**GGAT**AGAGGGAAA**ACTC**TTA  
GTTCCCAAAAATAAATGCCATTGTAC**ACTC**TCCTTCTTATCATAGA**GAGT**TAAAATTTTTGACCACAAG  
ATTGAAGTGTACGTGCGTCATCTCTACAGAAGGAAATAAGAGAAGAGGCCATGAAAAACAAG**GGGT**GTT  
GGTAGCTCCATCTATTATGGGAGCTGACTTAGCTTGCATAGGAAGAGAAGCGCGAAATATAGAA**GAGT**CC  
GGAGCAGATCTT**ATTC**ATATAGACGTTAT**GGAT**GGACATTTTGTTC**CAAT**ATTACTTTTGGTCCCG**GAG**  
**TT**GTGCTGCGATTAATCGGTCAACAGAGCTATTTCTGGAAGTTCATGCTATGATTTATACGCCTTTT**GA**  
**AT**TTGTAGAGGCTTTTGTAAAGCCGGGG**GGAT**CGTATCATTGTGCATTTT**GAGG**CAGCGGAAAATATT  
AAAGAAATTATTAGCTAT**ATTC**AAAAATGCG**GAGT**GCAAGCAG**GGGT**AGCTTTCTCTCCAGAGACTTCTA  
TAG**GAGT**TTGTACACATCTTTCATACCTCTATGCGATGTCATCTTGCTTATGTCTGTGC**ATCC**TGGTTTTTG  
TGGGCAAAAGTTC**ATTC**CTGATACGATAGAAA**GAATTC****CAATTC**GTAAACAAGCTATACAAGTCCTAGGA  
AGAGAAGGAAGTTGCTTGATTGAAGTTGACGGTGGTATTGATAAAA**GAGT**CTGCACGAGCATGTAGGGAAG  
CAGGCGCAGATATTTTGGTTGCAGCCCTCTATTTTTTTT**GAGAAA**AG**ACTC**TATAAATATGAAAGAAAAAGT  
TTTTGTTACTTCAAGGGGAAGAACATGGTGCTAAGTAGCCA**ACTC**TCGGTAG**GGAT**GTTTATCTCTACAAA  
AGATGGCCTATACAAAGTAGTTCTGTTTTCGAAAGTCTCAGGAAACAAAG**GGAT**ACTTTTATTAAAGTA  
**TCC**CTGCAGGCCGCT**GGAT**CAGACGTGATAGTCGAGAGAAATTTAAAGCGGGCAAGAGGTCAAAGAGG  
CTCAGTTT**GAGC**CAAGAAATTTA**GAGT**ATCTATATCTGGAAG**GGAT**AAATACCT**ATTC**TTAGACTTAGG  
**GAAT**TACGATAAGATCTAT**ATTC**CAAAGAAATTTATGAAAGACAACGCCATGTTTTT**GAAAG**CAGGTGTT  
ACCGCTTTT**GCT**TTAGTGCATGAAGGCACTGTTTTTCTATG**GAGT****TACCC**CATTTCTT**GGAAT**TAATGG  
TTGCTAAAACAGATTTCCCTGGAG**ACTC**TTT**ATCC**TTATCAGGAGGAGCCAAAAAGCCCTTTT**GAAAC**  
AG**GAGT**AGAGGTTTTGGTACCGCTTTTGTAGAAAATAGGAGATGTTATTAAGGTCGATACCGCTACTTGT  
**GAGT**AT**ATTC**AACCGCTCTAAATTTGG**GGAT**AGCAT**GGAT**TTAAAGCAGATAGAAAAGCTCATGATTGCTA  
TGGGCCGTAATAAAATGAAGCGCATTGTTATCAAGCGTGAAGGTTT**GAGT**TAG**GAGT**TAGAAAAG**GGAT**AC  
AGTCCCAAGT**ATTC**AGGAGCCAGTCTTTTATGATAACAGACTGTTTGCT**GGAT**TTTCCCAAGAAAGACCT  
**ATTC**CTACAGATCAAACCTTGG**GAATCC**TATTGTTAAAG**GAGT**ATCGAGAAGAAAGAAAGTGAGGCGC  
CTGCTCAGGGAGATTTTATTGTTCTCCGCTGGT**CGC**ACTTTTTATGGCTCTCCTTCCAGAGGCTCC  
GGCATTTATTAAGCCTGG**GGAT**ACTGTTTCAGAG**GGAT**ACCGTTGTTGTATCGTGGAAGCTATGAAGGTA  
ATGAACGAGGTAAAGGCAG**GAAT**GTCGGT**CGC**GTAGAAGAAATATTGATTACTAATGGT**ATCC**AGTCC  
AGTTTGGTCTAAGTT**ATTC**CGTATAGTTAAGGCTTAGTTAATGAAGAAAGTATTGATTGCAATAGAGG  
CGAGATAGCTGTT**GGAT****ATTC**GAGCATGTCATGATCTAG**GAT**TAGCTACTGTTGCTGTAT**ATTC**TATG  
GC**GGAT**CAAGAAGCTTGCATGTGCTTCTTGTGACGAAGCTGTTTGTATTGGAGAAGCTCAGGCAGCAA  
**ATCC**TACCTAAAGATCGCCAATATTTTAGCTGCTTGTGAGATTACTGGGCAGATGCTGTGC**ATCC**TGG  
TTATGGTTTCTTAAGTGAAAATGCAAACCTTGTCTCTATTTGTGAAAGTTGTGGGCTCACATTTATCGGT  
CCTAGTGT**GAGT**CGATAGCGACTATGGGAGATAAAGTCGCAGCTAAGCAGTTGGCTAAAAAGATTAAGT  
GCCCTGTA**ATCC**CT**GGAT**CTGAAGGTGTGGTGAA**GGAT**GAGGTGGAAG**GGAT**TA**GAAT**CGCAGAAAAGAT  
C**GGATTC**CCCATCGTCATCAAAGCTGTTGCTGGAGGCGGTGGACGAG**GAATAC****GGAT**TGTTAGAGAAAA  
GAC**GAATTC**TATAGGGCTTTTACTGCCGCTCGGGCTGAAGCAGAAGCG**GGAT**TTAATA**ATCC**TGACGTGT  
ATATTGAAAAATTTATTGAAA**ATCC**AAGACATTTAGAAGTTCAAGTAATTGGAGATAAGCACGGAAATTA  
CGTGATCTTGGAGAACGAGATTGTACAGTACAAAGCGCTCGGCAAAAATTAATAGAAGAG**ACTC**CAAGT  
CCTATTTT**ACTC**CAGAAATGCAAGCTAAAGTTGGAAAAGTAGCAGT**GGAT**TTAGCTCG**GAGT**GCC**GGT**  
ATTTCTCTGTTGGAACAGTAG**GAAT**TTCTGTTAGATAAGGAGAAGCGTTTTTATTT**CATG**GAGAT**GAAT**AC  
GCGT**ATCC**AAGTGAACATACTATTACGGAAGAAGTGACAG**GGAT**CGATTTGTTAAAGGCTCAGATTAGT  
GTCGCTAAGGGAGAAAACTGCCTTGGAAAGCAAAA**GAAT**ATAG**GAGT**TTAAAGGGCACGT**ATTC**ATGCC  
**GAAT**CAATGCAGAG**GGATCC**AAGTAATAACTTT**ACTC**CTTCCCTGGTAGATTAGATTATTATCTCCCTCC  
TGCAGGTCCTGCTGTGC**GAGT**AGATGGGGCTTGTACAGTGGTTATGCGATACCTCCTTATTATG**ATTC**  
ATGATTGCTAAGGTAATCACAAAAGGAAA**GAAT**CGAGAGGAAGCGATAGCCATTATGAAAAGAGCTTTAA  
AAGAGT**TCC**ATATTGGTG**GGGT**GC**ATTC**TACA**ATTC**CTTTTCATCAGTTCATGTT**GGATAATCC**GAAGTT  
TCTTCTTTCTGATTATGATATTAATTACGTGGACCAGCTTTTAGCGTCTGGTAGCACCTTTTTAAATTTA

GCTGATGGCAGCTAACTATTTTTTTTATTATGTAAATCATGATTC AAGAACTTCCCTAAAATATTTTTTC  
GAAAGAAGTGTAGAAGTGTAAAGGCTGTTTTTGAAGGCCAAAAGAAAAGAGATCTTTTTGAAATTTTTTCT  
TTTTCTAAATTC TTTAGAAGGCAAATACAGCTGCTTTTTGTTTGGAAAAATAATCATCAAATATAAATC  
ATTC CCTCTGATAAGGTGATTTAAGTTATGGAAAAAGAAAAGATACGAAAACG ACCCTAGCTAAGGCTT  
CGGACGATCGAAACAAAGCCTGGTATGTAGTTAATGCTGAAGGGAAGACCTTAGGGAGATTATCTTCAGA  
AGTTGCGAAGATCC TGAGAGGTAAGCATAAGGTGACTTTTTACTC CTCACGTAGCGATGGGAGATGGTGT  
ATTGTGATCAATGCTGAGAAAGTGCCTTACTGGCGCAAAAAGAGCTCAGAAAAGTGTATCACTATTACA  
CAGGCTTTATTTCTG GGATGCGAGAAGTTCCTTTTTGAAAACATGATTGCGCGAAAAGCCTGCTTATGTTAT  
CGAGCATGCTGTTAAAG GAATGTTGCCTAAAACAAAACCTTGGAAGACGTCAAATGAAATCTTTAA GAGTT  
TTGAAAGGTAGTTCTTACGCACAGTATGAAGCTATCAAACCAATTGTTTTAGACGCGTAATTTG GGGTAA  
TTTTGTGACAAA GAATATGATACAA GAGTCTGTTGCAACAGGCAGAAGAAAGCAGGCTGTTTCTAGCGTTC  
GTCTTCGTTCTGGAAATGGAAAAATGACGTAAATGGAAAGACTTTAGAGCAATATTTCCCTCTTGAAGT  
TCAAAGAGCAACTATCTTAGCTCCGCTCA GAATGCTCGGTGATGTCAATAGTTTCGATTTGATTATCCGA  
GT AAGTGGAGGAG GGGT TCAAGGTCAGGTTATTGCTACTCGATT GGGT TTAGCTAGAGCTGTTCTGCAAG  
AGAAAAGACATAAAGCAA GAAT TGAAGGCTCAAGGCTTCTTGACTCGAGATCC TCGTAAGAAAAGAGCG  
TAAAAAATACGGTCGTAAGAAAGCTCGTAA GAGT TTCCAATTC TCCAACGATAAGCTATTGCTTGTCCA  
TATATTG GAGT GCGTTTCAGAAAAGCCTTCTTTCAAAGAAGGCTTTTCTATTTTTAGGAACGCCAAAA  
CAGCTTCTATAGGCGGTTACCTAATGAGCA GAATAGATTC CCTTTAAAGAAAAGCCCTATTTCCTAGGAT  
TACTTTTTCTACTTTCCCTATTTTTTCCGCGAGCAT GAATGAATTC ATGCTCCGAGATTTTCATCATAACA  
TGGTTGATTTGTCCCGTGCTTTCTTGAGGAAGATAAGTCCCTATAGGTAGAGACGAGAAATCTT  
TTACTGGAGAACAGTCTCTGTATTGATCTCTAGCATTTGCGAG GAGT ATTTCTTCCGTGTGACTTGGTAAAG  
TAGTT GAATATACCC CGAACAATCTACACCATTACGAGGAAGCTGTTTTAT GAAT GCACCGGCC ACCCAA  
ACGTACGGAGTATCTATCAATTGTTCTGCGAAAAGAACTAAATCTCTTAGAGAGAAT GAAGAAT TAAAA  
AAC GAAT CTCTTTGTTAGAGCAGAAAAGCTTTTGCATAGTTACTTCTG GAAT TGGAAT TTAATAATGCTAT  
GCTAGCAGGAGATAGGGACACTTGATTTTTGGTTATCTATGTGGAGCGGAGCGGCAAAAGGTAAGG GGATA  
TGCCAA GGATCTAAAAAAGCTTCTTGAGAGCAGACAACAGCATTAGGAGGCTGCAGTTGGGAAGAGAATA  
GAG GAATATTC TGTAGA GAGT CGCCAGGGTATGGCTTCCATATAGAAGAAAAGACTAGTTGAGAATAGGC  
ATAGTGTGATGGTTATGGTTGCAT ATCC TTTCTCAAACAGTACTTGCCTCTCTATACCTTCAGCATTC  
GATAAAAGATCGCAAACAGGAGATAATAAGACTTGGTGCGGCATGGGAGAACCCTCGGTAGAGACATCACA  
AAGAGACTAAAAAGAGGTTCTTAGTCTTTGTTGAACGCGACTATACCAAAGAAAATTC TTTTCCGTATTC  
TAGTCTTCATCATCGCAATCGCAGTTGCAACAGTCTTTTCTTGATAGACAAGAGAAGCAGAAAAGGCTAT  
CTAGGATACTCTG GAATACTTGTG GAGT GGGAGCATTAGCATCAATAGTGATGAGCTTTTGCTTCTCTGT  
ATAATAATCCAGAACAGGTTGAGT TTCCTGTTTGTACGTTT GAATTC TATCTAGGAT CACTTCTAGAGTG  
TCATCTGATCGGC GAAT AAGTTCTACAGAGCATTTAGGGCAGGAAGAAAATCC TTGTTGTTCAATTGTAGA  
TGCTTGACAAGCTGGACAAATATACCGAGAAGTCAACCGATTAGAAGTCTTCTCATCAGAAATGTCTAA  
CA GAAT AACTTTGTAATTGGGGAAGTAGGAACATAAGAA ACTCATGTAAAAGCTTCGCTT GGGT GACAGTT  
CTTGGGAAGCCATCTAAAATAGCACTGTTCTCAGAACGAGATAGGAAAGAAAAGTCTGCTGTAATAACGT AT  
CC TGTG GAATTC ATCTAGTTTTTCGTGCACTAACTTCCAAACCAATGTATCTGGAAGCAACTTCCCCTG  
GTCTAGATAAGACTTAATTTCTTGGCTGAGCG GGGT ATCTTTGGAAACCGCACCTCTAAGCAAGTCTCCA  
GAACTAATATGCAGGAG GGAT AATTGAGATGCTAGTAACTTTACT GGGT GCCTTTCCC GGATCC TGGGG  
CGCCATAATAATAAGAAAAAGAGG GGATCGATCC ATATCATCC TAATAAACTATCTTGTAAAGCCGACAA  
TACTTTGGAGGCCATATAAAATGTACAC GAGT TTTTATTTTTTTTCGAAACAGAAGTCGTATAAAAATTT  
TTTTGATAAAAGATTTTAATTAGGAAAGGCTTTTTTTATAAGAACC TTTCCGGTCAATATAGTTACATAGA  
TTTTCTTGATACTAATGACAGGAT AGGGAT AGTGGAACTATTTGCTAACAGCAAATTACTTCTTC  
GC GGGT GC GGATAC ACCCTATTGATTACAGCTATTTCTTTGGTGTGT GGGT TTGTACTGGGCTGGGGTAT  
AGGAACGTG GAATTC TCGGTACTTCCCTTGTCGTATATCTAAATTTTTAGG GAAT TTTTATGTAGTGGCG  
GTTTCGAGGAACACCGCTGTTCAATTTTGGATTGTATATTTCC GGAT TGCTGCTTACTTAGCTGAAAATGT  
ATTT ATCC CCACTGGTGGCCGGACTGATCGCCCTAACCTT GAATTC TGCTGCTTACTTAGCTGAAAATGT  
GCGTGC GG GGAT CAATGCGCTACCTGTTCAACAATGGGAGGCAGCAAAGTGTG GGGT ATACAGGACCA  
CAGATCTTCTTGCATATACTGT ATCC TCAAGTTTTTAAAAATATTC TTCCTTCTCTAAC GAATGAGT TTG  
TTTTCTTAAATCAAAGAGAGCAGCATTC TTATGGTAGTAG GAGT TCCT GAAT TAACAAAAGTCACTAAAGA  
CATTGTAGCTCGGGA ACTCAACCC TATGGAGATGTATTTAATCTGTGCAGGGCTTTATTTGATAATGACC  
TCTGCTTTTTCTTATTTTGTAGATTATCAGAGAAG GAGT CTGCATGACTGTTGAAGTTAAAGATTTGAC

TGTAGCTGTGAA<sup>GGGT</sup>AAAGAG<sup>ATCC</sup>TTTCCAACGTCTCTTTTTCTCTAGTCCCCGGGC<sup>GAAT</sup>CACTTTG  
TTCATCGGGAGAAGT<sup>GGGT</sup>CTGGGAAAACAACAATTTTACGTTCTTTGGTAGGCTTA<sup>ACTC</sup>CTATTTCCA  
GCGGTAGTATTTCTGTCGTAGGAG<sup>ATCC</sup>TCCAGGTTTTGTTTTTCAACAACCAGAGCTGTTTCCACAT  
GACAGTACT<sup>GGAT</sup>AATTGTGCGC<sup>ATCC</sup>TCAGATGATAGTCAAAAAACGTGGGGAGAGAGAAGCTAA<sup>GGAT</sup>  
AAGGCCTTAGATCTTCTTGGTATGCTGGAGCTCAGA<sup>GAAT</sup>ATGC<sup>ATCC</sup>AGCT<sup>ATCC</sup>TCATCAGTTATCTG  
GAGGGCAGAGACAGC<sup>GAGT</sup>AGCAATTGCTCGTGCTCTTGCTCTTGATATGAGAGCG<sup>ATTCT</sup>CTTTGATGA  
GCCGACTTCTGCTTT<sup>GGATCC</sup>TTTTTCAGCCTCAAAGTTTTCTTCAAATCGTTCTGTCTCTAAAAGAGCAG  
GGCATGACTATTGCGATCTCTACACATGATATGCT<sup>ATTC</sup>ATTAATCAATGTTT<sup>GGAT</sup><sup>GAGT</sup>GTATCTTG  
TAGATAAGGGGCAAATATAGATGCTTACGATAGTCTGCACGACG<sup>ATCC</sup>TCAAGCAAATAGTTTTGTGAA  
GCAGTATCTTTCTCTGCAAGAAGGGCCACAG<sup>GGATCC</sup>GAT<sup>GAAT</sup>AAGATT<sup>ATTC</sup>TGTTTCAGAAACTTCC  
CACGGAAGAGGAGAGACTGTTTGTGTAG<sup>GAGT</sup>AGGCTCTCCTAATGATGAGAAT<sup>AATTT</sup>TATCGGCTAAC<sup>G</sup>  
<sup>AGT</sup>TTAAAG<sup>ACCC</sup>GCTATTGTATAGCTTTTAAAGTAGAGCG<sup>ATTCT</sup>GCGCATATGCAGAAGACCAGTCAAT  
TTCTGGAGACGAAATAGGTCCTCTAATCTTGATTAGGAAGAAGTTTTTTGTCTTTAGCATAGTATTACGG  
AAAAGCTTTTTTAATCAGTTCC<sup>GGAT</sup><sup>CAATCC</sup>CCAAAGTCATCGCTAATCTCTCGCAACAATATCTGTTT  
TTCCCCATAAAGCTAGTCGTATGCGCCATCAATAAGAGCATCGAAGCGTTTACAAATGATTTGCCCTT  
TTGTACAGAGAAAAAGATTGGGGT<sup>GAACCAAG</sup><sup>ACTC</sup>AACACGTTGCTGTTTACAGCTTCTAC<sup>ATCC</sup>AAAAAT  
TGAAAGAGATCTTGCATAGTTCTGT<sup>ATTC</sup>GCTATTTTCGATCTTACCAAATCTAAAGAAGC<sup>GGATT</sup><sup>GAA</sup>  
<sup>T</sup>ACGAAAATTTTCAAAG<sup>GAGT</sup>ACGGCTTGATAGGAAGATAAAAAATTTTGCTTGTTCT<sup>ACTC</sup>GTAAACTTAC  
<sup>C</sup>GGGT<sup>GTTTT</sup>GGAAT<sup>AAGCT</sup>CCACCTTCAGCAATCAAAG<sup>GGAT</sup><sup>TGAATTC</sup>CTAAGAAAGGCTTTTATTGATT  
TCCTCATTGATATGTAGAGATGCTGTAAGGTCGCTTCTAAGA<sup>GAAT</sup>AGCTTGTTCTGTAAGGACTAGAG  
GGAAATAGGCTGTTAGATTTTTCG<sup>GAAT</sup>CTACTTTAATCGTTACAGGACCTTCTCCTCTAGAGAAATCGTT  
GT<sup>GAAT</sup>GGAGACAT<sup>GAAT</sup>TTTTGGTCCGGCTAAAGAGGTTAGTTTAGAGCGAA<sup>ACTC</sup>CAGGAGAGATAGGA  
AAGATTCTGTAATAAAAGAGGTTAG<sup>GAAT</sup>ATTT<sup>ACCC</sup>AAGTTGCTGTTTGGAGCAGGCTCTAGTCTCAT  
CGGAAAAAATATTTCTAGCTTCTCCTTCAATAATAAAAGATACAG<sup>GAGT</sup>CTTATT<sup>ATCCT</sup>TGGTTAGGAGC  
GAGGCAATTTCCATT<sup>GAGT</sup>TGATATT<sup>GAAT</sup>GAGATCGTTTACATTTTGTGCGTAAACCG<sup>ATCC</sup>ACCTATA  
TTATTTACGATAAAAAATTTCTTTAGATAGATGGTCATAAAAAACTAATG<sup>GGGT</sup>GGAAGATAGCTTCCCTT  
CTATGCCGCTTGGAGATAATAGAGAGAGACAG<sup>GAAT</sup>AGCCTGTTTTTTTTATCTAAGCAAGAAATTTTAGA  
CAGATCAAGACGAAATGTCGTAGGCCGATGCAAAATACATGAAGGTGGGCAAGAGGCTTTTTTCAAAGAAG  
GAGCTATAGCGTTCTGGGGAAATTTCCATTGTAATG<sup>ATCC</sup>AT<sup>GAGT</sup>TTTCTCAGTCAGAGACA<sup>ACTC</sup>TT  
<sup>T</sup>ATTCATAACAAAACGGAAGTCTCCGGTAAGAGC<sup>ATCC</sup>GTTTTAAATCTAGAGGAGATATCTACAGTTTC  
CTCTTT<sup>ATCC</sup>GGAG<sup>GAGT</sup>AAAGAAGTTGAAAGGAAGCTT<sup>ACTC</sup>GTTTCTCCAATATAACGGGATAGAGAA  
AGGCTTTTGTGTTGTAATC<sup>GAAT</sup>GAGCCT<sup>ATCC</sup>ACC<sup>GGAAGT</sup>TGTAGAAGTTCCCC<sup>GGAT</sup>GCTTGCACAG  
AGATATTATCTGCAGTCCAAGGAGCACTGG<sup>GAT</sup>CTAAAGACGAGATCACGATATCTG<sup>GAAT</sup>GAGAATTTT  
TGTTCTTCTAAGTGAGGAG<sup>ATTC</sup>TGG<sup>ATCC</sup>GTTATAAATAATTTTACGTTTCTTTGAGCAACGCCTTT  
CCCCCATCA<sup>GAAT</sup>GAAGTGAAAAGCTAGAGCGCGTCATTTGCAGTGGAGCAAATTTAGGG<sup>GAAT</sup>ATAAAT  
CTAAAGGAAGAGAGGA<sup>GAGT</sup>GTTCCATACTAAAGAGAG<sup>GAAT</sup>TGGAAGGCTTCATCTCTTCACTAGC  
TCTACCAAATTTTCCAT<sup>GGAT</sup>AAAAATTTCAATATCTCCAGCAAT<sup>GAGT</sup>TTGCCTGATAGTTTGGGAAA  
AAGACGTGTTTTTGGGAAAAATGCATCTTCCAGAGAAGATAGCTTGTATTTGTA AAAAGTGTGGAGCTA  
AACGTTCTTTCCAACGCTC<sup>GGAT</sup>AATGTATAGGCGCCCTCTCCACTAAATTTGATAGGCATATAAAGGTCC  
AGATAGGTTGCAGGA<sup>GAGT</sup>CTTAATAGAG<sup>GGT</sup>TATCTAGTAAAGCCTCGCAAGAGAGCTGTGT<sup>ATTC</sup>CGA  
TATTTCTTTGATATCTAG<sup>GAT</sup>ATAATAGGGGACTTCAAGTG<sup>GAGT</sup>GTTGATTTCAATAGGTTTAGGAA  
GAAGAGCTCGCAAATATGTGTGAGGCAAGAGC<sup>GAGT</sup>GTTGGATATGAA<sup>ATTC</sup>TGCAACATGTTTATGATT  
GTCCATAGAG<sup>GAGT</sup>GTGCTATGG<sup>AT</sup>ATAGGAAGGAGAAGCTCCTCCTA<sup>GAAT</sup>GGCAGAGGAAGAAGACGC  
ATGACCGTAAGATGATC<sup>GGAT</sup>TTGCGTATGGAAATTTTTGTATTTCTGTAC<sup>GAAT</sup>AGAAAGGTTCC<sup>GGAT</sup>  
CGA<sup>GGGT</sup>ATCTACAGAAATTTGAGGCAGGTTAGCTTGTAAATGAAAAGTCTGATGCGCTCCATTTCCGAGAT  
GGAGAGAGGAAGTTTTGCTTCCGATATAAAAAGATAGGCTTCTTGAGATC<sup>GGAT</sup>GGGCGTATCTAGAGGA  
GAG<sup>GAT</sup>TCAGAGAG<sup>GAATTC</sup>GAGAAGTTATTGTAGGCTGTAAGAGCACAGAAGAGGCTCCGCTTGTGTGA  
TCAG<sup>GAAT</sup>ACGCGATCGCGTACGTAACCACGAAGTTTTGCCGATATTTGATTTCTTCTGCAGTCA<sup>GAGT</sup>  
AATGAG<sup>GAGT</sup>AGAGTCTTTTTCTTGATGAGCTTTTGC<sup>GTT</sup>AGATTGATGAGATTTTCTGTTGATA<sup>GGATT</sup>  
<sup>C</sup>GGTCTAAGGAAGGAGAGGCTATAAA<sup>GAGT</sup>TTGAAAAGAGAAGCAGGAACAGAGGAAAGCTCAACATTA  
GAACAAAATTTGGGGGAAAGAGCTCCTTCTACAGCGACAG<sup>ATCC</sup>TGGCACATCATTTTCTTTTGTAAAGAGC  
TCGTATAAGTAGTTGTTTACGCGGTTTTTTTTTACATAAA<sup>ACCC</sup>GGAAACCGAAA<sup>GGGT</sup>AGAGCCGTTAATC  
GTTTTCATGGTTAT<sup>GGATCC</sup>AAGTTCGAAGTGATATCGCTGCGCTCTATTTTAGAAAGAAG<sup>ACTC</sup>CAG



GATCTAAGTGATAAAGGGACGGGGAATTCATGGAGAGAGACTCATCGATTTGTAAAGACCAGCCTGTAA  
GGTCAAGGCTTTAGGAAATCTGTAGAGCAGTAAGCGAGGAAGAGATCCTTTTACAATGATCTTTCCGCA  
GCAAATATTTTCAGATTCGGAGTTCGATTCCTCGGATGCGAATTTTTTTAGCCGTTTGAAGACCGAACCAAG  
ATAGGTGTAGCTGTTCAATTTTCGCATTCAGTCCCCTTTCTTATTTAATACAGAAAGAAACAGATATTT  
TCCCGATTCACTGGAAAGGAATTTAGGAAGCAGCGCCAATAAAGCTAGAGGCCTCCACGAGAAGATAG  
TAGCCAAATATTTTATACCATGGAGAACGCTTCATGAATTCACTTTTTTAGCAATTTCTGAAAGGGAAAG  
GTTATGCGAGTTCCTTTTGATTTCAGTAAGTATATGAGTCAGCGCATCCTGTATAGGAATAAGAGAGGGG  
GAGCAGATTTTAGAAAAAGCAGGGGACTTAGTAAGCTGATCGAAGATGGTGTGATATGAAGGTTTCGCAA  
TGTTATGAGAAGGCTTATAGCCCTCTTTGTATTTAAATCATACCTCTCTTTCTAAAATATCTAAACA  
TTGAGAGGTTTTCTCCAATAGAAGCTTTGGCTTTGTTAGCAAGATAGTTTGCCTGGGAGGAGGGAGAGCA  
TTATCAAAGTGTCTGTGATTAGGGAAAGAACATACACATAAAAATGAACTTGAAATAGCTACTTGGGA  
AAATTTCTTCTTTAGGGATTAATAATGCTAAAACCTTTGTTTTGGAATAAGAAGTTAAGGCTCCTCCAA  
CAAATAGATAATAGCATAGAGGTAAAGAAGGAGAAGAAAAGAGGGTAAAGCAACTAGAGCTCCGTAAGTG  
AAGCTATAATTAATAAAGGTGGAGCTGGAGGCAAAAAGAAGATTTTTTTGAGAAAAGGATCCATGCACTACCAG  
CTATAGTTGCTGCAAAAAAGCTGCAGATTTCTTGGTGGGGACTCTAGAGAGGAATGCATAGCAACAAAA  
GAGAATCCCGTACAGAAGAGCATAGGGAAGTAATCGTGAACAATATAAATAAAGCCATGGAATGGCTG  
AAACTAAATAGTTGGGGTAGTTGATAGGTAATCTGTGTAATATAGATCCAAAGATCCGCAACAATAA  
TAAAGATCATGGGGCTAACAAAGAGTGATAACTAGATAGCTAATAGTCTCTTTAAAGAAGCTTGAGTGAT  
TCCTGAACAGAAGATTTTTATTTAGCCCATCTTCTAAAGATTGTAGCATCAGAATACCTGCCCAGCAGAAG  
ACAAAGAACTACTGACAAGAACCCTCCGATATTGCTAGTTGTTGAGTAAGCTGCTTCAATAATTGCCA  
AGATCGGCGCTTTGTAATCGGGAAAGTGGAGGAGTAACCCTCTTCCAGTCTAAACTAATGAATAGGTA  
TTGAGAAAGCCTGAGGAAGAAGACCAATATAGGAACACAACCTGAATAGTCCATAATAGCTTAGAACGCAG  
GCTTCTTTAGAAGCCCCGTTGTGATAAAGAACCTTTAGGAGCTTTTAGGATAGATTTGATGATGAAATTGT  
TGCGAACAGAAGAGAGAAGCTTTTTAAGAAAAGACGGAGGGCGCAACATAATGAAGCTATAATAAAAAAC  
AGATCTTAAAAAGATTTTAAACTAAAAAGAAGATTTTTTAATTATAGTTTTTCAAATCATTTTGATATT  
TTTTAATGCTGAGATAAACAAGAAAAGCGGAAACTCTTTCGCACAAAGATTTTTCTGCTCGAGCCCTCTTCC  
CTGAGGATTTTTTAGGGGAGATCCATTCCTCCATACATCAATCAGAAGATTGTGATTAGATAAAGCTTG  
TACCCAAATAGCTTAAGGGAAAATGGAAAATATGTCGTCTCAGAATGTTTTTCTCCAAGGATGCACAACG  
ATAGGGACCACCACAGGAGAGAGATAGCGGTCTATTTTTCTAGATAAGAGTTTTTTAGGCTCATCATAAA  
GCCATGAAGAAAGCCTAGGGATGCGAAAGCATGGATGGTTGAGAACAATAAACAACCTACCTGAGGAGC  
CAAAAGATTCGCTGTGTGTGCGATAGCTTGTCTGGAGATTCATATTCGAAAGAGAAAAGGATGCTGTA  
GCATGGGAAAACCTGCTCATGATGATCTGCTGGTACCCTGCGTCAATCGTGATGAAGAAAGCGACGTG  
ATTTTGAGGAAGCGCTTTCTTTGCAAAACGCAGCAGACTAGGGGAAAGATCGATTCCTAGATAAGGGAG  
ATATTTAGGTAATGCTTCTCCAAAATCCCTTGACCACATCTACATCAACCAGAGACGATGAGCGGGAA  
ATATGTAGCTTAGAAAGGAGATTAGGGAGAATCACTTCTTATGATAGAAATGTCCATCGCGATCAACGG  
CTTTATTATAATCTTGGGCAATGACTTCCCAGGAAGTGTCTGAGGACCGTTTTGGTGTCCGAGGATGAGT  
AGAAGCCGGTTTTCTGGACATAATTAAGAGGTTCTTAAATTTTATCCATAAACACCATAAGTCGTTTTG  
GATCGTTTTCGTCAAGGAAGAATCCATGTAAAGTTCTTAAACAAAAATCTTTGGCAAAACTCGGATATTCCT  
TGAGTAAGAATTCAGAAGTAGTTGTTATTTTGAAGGGTGGACAGTCTTCGACTTAGGAGATTTCTCTA  
ATTAAGTACAATGCTTCTGAATCGCAGCTTTTATCAGGATTTTTTTAAGTTCCTAGTTTCTTCGCAAG  
TTTTTATATTCCTAAGAGCTCAAAAAGTGGAACTGGGCTGCATAAGCAAGATCTATCTTATTGGTTTTCT  
TCCAATTAAGAAGGATATGCTGGCTGCCCTTTAGAGACCTATGATACGTGGATAGCGATTTCTAATTAGG  
GGAGACCGAAGCTTCGATAGAAAAGTAAGGAAATCCGCGGCGGGAGGAGAGCAGTTATGGCTTGTGCGC  
ATGTGTATACGGTTACGATGAGATTTGTTGTAGAGAGGAGACTGCAGAAAAAGTAGTGGCGGTGCGAGTA  
GACTGCGTGTCTTTTTCATATAGCAGCAGCGATCACCACAGCGGTCTCCGAGTATGGCTTCTTATTAGGT  
TGATGCGTGTGCAATTCATAACTACTGTTCTCTGCTAGTGAGAAGTAACTTCTTCCCTATCACAGA  
AAGCCGTGCTGAATGGTCTCATTAATCCAGTTTTAGGGCCAATGGTAGTTGCAGCTGTTGTTACTTT  
AAAGCTAGAGAGGAAGGTTATGGACATTTGGATTCCTAGTGTGCGCTATGCAGTCTCCATGGATGCTAT  
TAGATTCCTTCGTTGAATCGATCTGAGCTAAAGATCGTGATGGTCTAATAAAAACAGTCTAAAAAAGAT  
TTGGGGAAACGAAATAAAGAGGTAAGCTTTTTAAAGATGGTAAGCTTCGATTTAAATGATCCAGTAAGA  
AATACAGACAATCATACAGAAATATCAATCGCATGCTCAATAGTGCAGCTTGTGCTGCTGGCGGCATAG  
GATGTTAACACCAGTGGTATGCTCTCCAATGGGAGCTTTCTGTTTTGCTCAAGGGCCTTCTAGTGCCGA  
AGACTTAGGGCATCGTATTCACATTTTGTGCGTGTGGGACCAGCTGCAGGATTCATTCCTAAGT

AACGAACGGATCATGTTTGAAGAGGCTGCAGTTCCTAGTGTTCTCGAAGCCGTAGAAGCAACTTTTTGGA  
TATCTGCCTTCGCCGTTTGAAGAGGGAATAAACCTTCAACTTGCGATACTGTGATGATGAGTTGCTTAAT  
TGGATGCATTTCTTTGGTATGCGGGGCTATGTTTGTGTCATTGTCCTCTGTGCTGTGAAAATTAGTCGC  
ATTGTGAGAACTATGACGCAGGCACATGCGCTCCGTGAAACAATTCAAAGACAGTTAGCAGCACGAGCTA  
CAGATATGCGTTCGCTTACTCCAAGCTCAAAGGCATTATAGCCATAAGAGCTCTTAATGAAGTAGAGAG  
GGCCATCGAAAATTAAGAAACAAAATGATCACAGCTTTTGTGCAAATGCACTATTACACTGGCCTTC  
TGTGCTTTATTAGCTTCTGCGGTAATCGCAGCATTTTTCTTAGGTGCAGCAAGTGCTGGACTAGCAAGCG  
TTTTCTTTGGGTGCTTATGGGGAGGCATAGGAGCCTTAGCTGTGCGAGTTTGGTTCGGCATCGTTTCCGG  
AATCTGCCAGCGCAACTATAAAGTAGAAGCTGCGCGGTGTATTCAGCGAGGTGCTCTTTATGCGCTTGTT  
CTTGAGAAAATGCAGCGATTCCTTAAAGAAATTCCTTAAAGATGGTGTAGCGAAAAGTGTGGTTGCGATTC  
AAGCTGGGGAATCTTTGGATACAGGAGAGTTGGCTTGGGAAGAGATGCCGAGCATCACAGCTTGTTAGG  
AAGAGAGGGAATAGATGCTCAGGCGTATTCCTTTCTTTCTGTAAGTCCTTTAGATGCGCGTATAAGTTAA  
ACGGTTTCGAAAAAAGAAATTTTCTGCTCATAGCGGCAGATTTGTGGTATAGTGCTCCCTAAAGCTTTAGA  
TCAGCTTTTAGGGAGATATATGAGCTATTCCTTTTTTTCGTCGAAAAGCTTGCTGGATAGAATTTATAAG  
TGTCCTGGAGATCCGTAAGCTCCTGTGATCATTTTTTGTACGGGTATGGCGCAAGTGCCGATCATCTTA  
CTTTTTTCCCAACCATGTGCGTGTGCGCAATTTGCGTCCACATGGGTCTTCCCTCATGGTATAGAACA  
GCTTCCCTACCAGTTGGGAGGGGACGAGCTTGGTTCCATTGGATACCGTTCTTTTTGAAAAATTGATT  
TCTTCTCAGGAAATCACTCCAGATACGGATCGTTTATATCAGCAGCTATTGGATGTAGACTTTGAAAAGC  
CTAAACAGGCTTTAGAGGGTCTTATTCACGAGTTGGAAAGAGATCGATCGGAAGTGATTATTGGAGGTTT  
TAGTCAGGGAGCTATGATGACGACGCATCTGATGCTTTCTTCTCGGCTTCTTATCGAGGTGCTTTGATT  
TGCTCTGGAGCAGCCGTTCCGAATCAATCTTGGGAAGAAAATGCGTCTTTATGTGGGAAAAGCTCCTTATA  
TACAAAGTCATGGGTACGATGATCCATTTTTGCCCTATTTCTTAGGGAGCGGTTATATAAGGTTTAAAC  
AGCTCTTTTAAAGCGAGATGGTTTCTTTTCATGGAGGACATGAAATTCCTGTTGTTATGATGCAAAAG  
ATACAGGAAAGCATCGCGCTATGGAGTCAGTCGACATAAGGCGGACAGGAGTTTAGGTGTTTTCGCAAC  
AGATTGAGGAGAGCATTAAAGGCGGGCAAGTTTTTGCCTTCCCTACAGATACAGTATATGGTTTGGGAGT  
TTCTTTTCATATCCTTGATGCTGATCAGCGATTATTTGCTCTTAAGCACAGATCTTCCAAAAAGCTCTG  
TCCGTCTATGTCTCATCTTTAGAAAGAAATAGAGGCTGTTGCCAACAGTCTTTAGGAGCATCTTCGAGAA  
AGATAATTCAAAAGTTTCTTCTGGCCTTTACCTTGATTACAAAACATAATAATCCGAGATTTCTCA  
GAAAACATTGGGATTCAGGATTGTTAATCATCCATAGTGCAGCAGATCATTCAAAAGTAGGGCCGTTT  
CTTGCTACTTCAGCGAATCTATCCGGCTTTCTTCTGCAAGTTTCTGCTGATGAGTAAAACAAGATTTCC  
CGGAAGAAGATATCGTAATGATTTTCAAGGAAATGTTCTATAAGGTTGGAGTCTACAGTAATCGATCCGTA  
GGAGCGAATGTTTATCGTGAGGGTCTATTTCTATTGCAGAAAATAGAACTGTATTGGGGGCTCCATGT  
GCTAATCTGTCTAAGGAACATAGGGTTTAGAGAAAAGATAGGTATCCATGTTGTAAGAACTCCCGCAGATT  
TATGTAGTTTTCTTTGTCTAGACCTCATTTTAAAGGGTGTATTGTCCATCAGCCTCATCCATACATTT  
TTATTCGTTCTAAGGCAGGCTTTACGCTCTCCTACACAAGAAATCATTTTCGTTTACGATTTGTGCAAT  
ACAGAATATCCAAATTCCTTACGTTTTCTAGGAGTGAGTTATGATAGTGGATATGCATTGTGATATGCTA  
TCTCATAAAAACCTTTCTCTTTCAGACCCAGCGGTACGAAGCTCTCTGATCAATTAATAGAGGGTGGAG  
TGGGATGTCAGGCCTGCGCCTTATTCACAGAATCACAAGAAATGCACCACATTAGATGAACAAAACCAATT  
GTTCTTTTCTTTAATAGAGCAAGATGAGCGACTGACTCACATCTTACGAACCACAAGTAGAAAAGCTCT  
TTGCAGGTAGTTCGTAGTATTGAAAATGCTTCAGGTCTTGCTCTGATGCTCAGCCTTTACAAGAACTAT  
TTCGCAAGCTTTTGTGTTACATGAACAGGGCCCTTAGCCTATATAGGGCTTGTGGAATTTTGCAA  
TCGTTTTGGTGGTGGATTTTAGAGCCTAAACGTTTGTCCAGAGATGGGAAAATCTTTTGAATTTGTTG  
CATGCTCTAGCTATTCAGTGGATCTTAGTCACTGCTCAGATCCCTTAGCGGATGATATTTTAGATTTTA  
CTGCAGATAAAATGCCGGACATGTTCGATTGGCTAGTCACTCAATTTTCGCGCGGTTCAAGGATATCGA  
GCGGAACCTTATTAGATGTGCATGCTAAAGAGATTTTGCAGGGATGGGTGATTGGGCTGAATGGAGTG  
AACTATTTTGTAGGAGCATCTTTGGAGGATATTAAGAAAGCATATCGCTCATGCCCAAAGTTAGGGATTT  
TAGATAGTTTAGTATTAGGAACAGACTTTTTTTTATACTGAGGAAGAAAAGTTTTTCCCAATTTTCCAC  
AGCAAAAGATCACCCTAAACTACACGCTTTGATTAAGGAGGCTATTCCTATAGACAAGGCGCAATCTCTG  
CTAGAGGAAAGAGCTCAGCGATTTTGAATCGGGTAGTTTCGGCACAAAAGAAAAGTTGTCAATCACATTG  
CGTCTAGTGAAAGTGTGCATAGGTCAAATCAACACTACCTGAAAGGATAGTGAACAATTTGATCTAGCGG  
TCTGCTCAAAAATATAATCATATTCATGTGGTACAAGGGCAGACAAGTGAATTTGTCTAGAGCCGTTTGA  
TCGAACCTTAGATTTAGCAAGGGATGGAAAGCTATAGAAGTTGCTGTGGAGACAGAGAAATCTTGGAGTGG  
CTCGTTTTTGAACAAAATACATGGTATTCGAGTCTTCAAAGAGTCAGCTGGATACCTGCGTCTCGGCATTG

TTCTTGCAATACCTCGGCCAAACGCTGACAGCGGTAATATTATTGGGATATATCAAAGTAATTTTCCCA  
GGAAAAGGAGTAGAAGCTTCTTGATGAGCTATGATTCCTCTGGAGATGGAGAGCTTTCAGCTACTCGAT  
ATTGTGTTCTTAAAGCTTGCTTACCAGTTTTTCTTTTTGGATGGCAGCAATCAATCGCTGACGATTAGA  
TAGAGAGGAAAGTACAGGATCTTTGGATTAAGAAT AAGCCAGAATGTGCCATCTACAGGGTAATGGGTG  
TAGAGAGCAGAGGTAGTCCGAAGCTCAAAGGAATCCCTTGGTGCCAAGGCTGCCCCACCCAATCCACGT  
CACCTCTTCTTAAGAGGTGTAGAGCTGTGTAATGTTGGGAATGATGCGAAAGTCTATGGAATGTAATTC  
CACATGCGCATGGTCATAGTAATAAGGGTTTTTTTTGTAGAACGAGCGTTTTGCCCTTGCACATAGGTTTTT  
GGCATAAAAGGTCCAGAAGAAAAGAAAAGGATTTTTCTGGACGATACACAGCAAAAACGGAGAGGCTAATA  
TCGCCAATAGTTGAGGCTCGGGTCTTTGAGTTCAATAAGGATTTCTGAAGAAGAAGAGGCTCGAAAAGA  
TAGCTTTTTCAAAGTAGGGAATATCGCCAGCTTGTTTAGTGTGTTCCCAAGCAGCTATTACATCTTCT  
GCAAGTAAAAGAGAGCCGTCACTCACTTAGCATCTTTACGAATACAAAACGATAAAAACCGCCCGTCTT  
CCGAAATTTGATAGGAGGAGACCAGAGCAGGGGTAAATCCAGAGAGCTCTTCTCTGAAGAGAGTAGCAA  
TAAAGCCTTGGACAAAAGAAAATGAAAAGCATTTCCTTTTTCTGGAGAAAAGAGAGCGAGGATCATCG  
TGAATGGCTATGATTAAGCCGATTCGAGGAGAAAAGGAGCATCCGACCGTTAGGAAGGCGATAATAC  
TAAAAAGATAGAGCGAACATACATAAAATATTTTTGAGTATTTCTGTAGAATCAGAAGTTTTTGTGTTGT  
TGCCGGTTCCATTC TAGAAATGTATAATACTTCTTAGAGAGCGGAAGTATAATAACTTTTCGGAGAAAA  
TACACAGTATTTTTTCGCTGAAAAGAATGCTTTTTCTCGTATTTTCAAAGT GAGTTTCAATTTATGTTAAACG  
AGACATTTATTTGTATTGCAAATCC TTGTAGTTATTGGGTTCGGAGCTTTTTTTTTGCTGCGCGTAATCTAAT  
TATGTTAGCGGCATGGGCCTCATTGCTTTCCATTATCATGAACATTTTTGTATTAAGCAAATCGTGTTA  
TTTCGGATTCGAAGTAACGTCAGCGGATGTTTACGTGATAGGGCTGTTTTCTTGCTTGAATGTGCGAGAG  
AATTC TGGGGGAAGGAGTCTACAAAAAAGTGATTTTTGTTTTCTTGGTGCAGCAGCTTTCTTTTCTAAT  
CCTGACACA ACTCCATCTCCATCTTAAGCCTTCTCCAGGAGATATCAGCCAACGCACTATGAAGCTCTA  
TTCGCCCTTCTCTTCGGAT TATTTTCAGCATCAGTGATCACAACGATGATTGTGCAGTTTTGTTGATTTTA  
AGGTATTTGGTTGGCTGAAAAAACATTCGCGAGGACGGGTCTTTGGATTGCGTTCGCATGCTCCGTTGC  
GCTTCTCAAAGCATAGACACCGTAATTTTTTCTTTTCTAGGTTTGTATGGACTCGTTGCTAACTTACCA  
GATGTCATGATGTTTTCTTTGTTGTCCAAAGGGACGGCTCTTTTGTAGCTTCTCCTTGTGTGGCTCTAG  
CCAAGTTTTTTTATAATCGCTTGAATAAAGAAGAAGCACACTTTAATCGATTTTAGGTTTTACAAAGA  
AAGCTTTATTTAATTTTACGAATTAACACGAACCTGCTAGTATCCCTTGCTCTCGCTCCTCTTGCTACT  
AGGAAACGGTGAGTTCCTTGTA AAAACTG GGGTTGCAAAGAAGGTTCTTTGTAATTAATTTTACGAATGA  
GAAGAGACAGGAAA GAATTGATGTTGAAAAGCCTAATAGAAACGATCCCTTGCTCTTGTGGGTCTGGGAA  
GAAGTATAAGCAGTGTGTTTGAATCACAAGCTCTAAGTCTGCTGCCATACTCCTGAAGGGAAATTTAAG  
TTTTCTATAACAGCTTCGCTGCCGAGGCGCTTCCAGGAAGGTTTACAAAACGTTTTCGCCAATCAG  
TGGATTC TTATACCTCAGAACAAAAGAGGGGATGAGT CGGTTCTTATTACTAAAATAAGGAACCTAT  
AGGAAACGCGCGATTCGCAAGGCTAAGGCAAAAAGAAGAGCGCATCATTTTACAGAGAACTAAGCCAGCAC  
GAATTTCAAGTGATGGATACAGAAGTATCGGGAGAAGATATACAGTCTTCACTAGATTATGAACAGTTTT  
TTCTACAGAAGAAGACTACCGTGTGCAGAAAGAGGAAGATTCATAAGAATCTGAAAATTC TTAACTTTT  
TTGTTGCGGCTAAAGTTTTCTTTTTGTCATAATGCTGGTCTTATGCTGAGTAGCTCAATTGGCAGAGC  
ATTCGATTTGTAATCGAACGGTTGAGGGTTCAATTCCTTCTCCAGCATCTTTTTTGGGGGGGTGTGCA  
TAGCGGTC AATTGCATCGGACTGTAAATCCGACTCCTTACGGATACGTTGGTTCAAATCCAGCCACCC  
AGGACCTCATAAAAATCC TATCAGAAATCGGTTGTTTGCGAAGCTTGGGTCTCCAGGCTTTTTTTATG  
CTCTTTTTATCC AAGTTTTATTTAAAAAGAAT TAGTTTTGACTTCTAATTAATAGTTTGTCTTTTTATT  
CAAAAATAAAACTTGGAACAATTAATGAGTGATTC TGACAAAATTAATTAATGATTGTGCGGTTGACTT  
TAATACAACCTGTTTATGGAGATCTTTTAGCTTCAAATCTGACTACGGAAGGGGACGTTACGGTAAAAGT  
ATTTCCGCAAAA GAATCC TTTTCTGTGAAAAGAAAAGGTTGATGTGAATGAGAACGACATCATTGTTAACG  
GTTTTACCGGTGCCGAGGATATGATCTGACA ACTCGAGGCAAAAATTTCAATCAATCTCAACGGTAATCG  
ACTTAGTAATGTCAAATGCCCGGAGAAAAGACTCCCAACCAGTTCCTGCTAACTATATTCGTACTCTGAA  
TACTATTTCTGCTCATTGCAAGATGGAGCAAGAATCGAATGGAAACGGGGGCAGAAGCTTCTCTAATCG  
GGCTTCGCGCTTGGTGTATCAATCGTCTCGTATTAATGAGTTCATTCGTTTTGTATCGTTTTGAAGAAA  
TAAAAC TAGGACGCAGGTGAAAATAAATCTCTCAGGGACTACAGGCTGCAAAATGCTTGCAAAAGGTGTG  
TACATTATCAACGTAGGAGTTGGGAAGCGATGGGGTGAATAATGGATATGGAGGAGATTACTGTTTAG  
CGGTCCCTTTAGGAAAAGGAATACAGTGAGAGCTCTACATTTAGTAGAGGAGGATACTATGCTTCTACTGC  
TGTAGGAACAGCAATTCATATCAGAAAAGAGAGCACAAATCC TGACGGACCTTTTTCTTCTTCAGATACA  
GAACTTATGAAGACACTTTTAGAGGTGCGTTACAAGGGCGGAGACTATGTGGACAAGTCCGCCTTGTCCA

CTTTATATTTTGAGTGCTCGTATACCCAGAGATAGGAGGATAACATGAAGAAACCAGTATTTACAGGGG  
GAGCTCCTATTCCTGGATAAGTACAGAAGAAGGAACGGGGTTAAAGATCAAACTTATGGATGCGCAA  
TGCCACCTTAAAGGTAGAGGGGATGCGACTATAGATGACACATTAACCAGTCGGATTTAAAGGTTACG  
GGCCTACAATACATACAGATCTTGATCTGTAGTAGGAGGAGATGTTAAAGGAGGTAGGACGGTTCTTG  
GTGAAACCGTTCTAGAAGGAGATTTTAATATTAAGTGAATCAAGGACAAGTTCCCTCAGTTCACTAATTT  
AAGCGATCCTCTCTCCGCGAGAGATGCGATTACTTTTGATTATTATCGGGATAGATCTACACAAGCTTAT  
AACTGCGCGACCCACCCTAATGGTGCCTAGTTAAAGGGAACAGGTTTATCGATTACGTATGCATAATA  
TTGACGACTCGGAGTCTTACACACCTATGTATCAGAATCGGTTCTATTGGAAAGATAATGATCAAAAAA  
ATTATATCTGAAAAGTCCAGGCATCTATCAAGTAGCCTTTCAAATATTTGAAAGTGGGGATACCCTCA  
GGTAATGAGGATCCAACGATCTTCTTAAGATTATACACCTCAGCCTATGAGTACACTAATCTTTGTACTG  
GAGATACAAGAAGATTTAATCCAGAGCATAACAAGAATACCTCCCTGTATTCCTTTCTATTCCTTC  
TATTGGGAATGAGCATCCTTTTATACAAGTTTTTCAAAAAATTCATGTCAATATTGCGTACTCAATGATT  
AACGTGATTTGGTTTCTTTTGGTTCTTCTTATAAGGAGGCAGATTAATGACAACACCAGATAATAATAC  
TATTGATGTTTTCTTTCCGACATTTGTACGTTTGAATGTAGCGACTACGGATTTAGCAGATGGAAATAAG  
AGTAAATGCGGTTACGATTACAGAAACAGCAACAGCCAATTACGTGAATGTAACACAGGATTTAACCGTA  
GTACAGCCAACTTGAATGTACACAAGATCTTATTGCTCAAGGAAAATTGATCGTGACTAATCCGAAATC  
GGATATCTCTTTTGGCGGTCGTGTGAATTTGGCAGATAACACGATAACTTATAATCCGTATAATAATGGG  
GGAGGAGAAGTTGCGTTTACGGACATCAACTCTCGTCAAGGGAAGCAATACGTTCCCTTATGGGCTCTATA  
AGAATGGAGCGCCTAAAATAAGTATGCGTTTACGCGTATCCGGAGGCCACGTAAGGATCTGGAGATACTAG  
AGGCTGGGGAGCAGAAGTGTCTTGGATGCCTATCTCAGCAGAGAGAGGATTTAGAAGATAAGGCTGTG  
ACTTTTAGCCCTGCGAATAGAGGTAAATTGTATTTGAGGCATCTCCTGCGGCTCCCGTTTTGTCCGCT  
TCTCCGTCTTTATGAGAAAAATGGAGACTGGCTAGATAATGGAGCAGGGGGACGTGTGATGCTCTATGT  
AAACACTAAAAATTCGCTGGGAAGACGATGCGACGTTATTAGGAATAGCCGTATGTTTAGGGTCCACA  
TGGTATACAACAGTACCTATGTTTTGGTGCAGCAACATACTATGCAACTTCTTCAAGGATTTTTCCAAT  
TGATTGTGGGAGAGCGAAACTTTCGTGTTTTCTCTCTCTCTTGGAGTGTGGTTCGGCTACCTGTTGTTCC  
TTAACGGAGCTCTTTTCTATTTACACCGCTTAGCTTGTCTTATAGTTAAGCGGTTCTTTTTATCAAAACAA  
AATAAGAGATCTTTTGTGTAGACGGATCGGAAAGCTACAAGTATAGTACTGGGAAGAGCAAGTCGCTTA  
ATAGGTTCAAGTAAAGAACTTCGCAACAAGGTTAGAGGTCCCGAGGAGATGGAAGAGCGAGCCGAGTT  
GAATATTGGGGAGACTACAAAGTAATCGCAGAATCTGGACATGGATTTGTGGAGCCGAGATGTGCTTGGCG  
AACATCGATTCATTAAGAAGCGTTATATTCCTCAAGATACTGCCTTCGGAACCTTCTTCTTCAGAAAATTT  
TATGCGAGTTTTTTCAGGAAGTGATTGTTCAATTGGCTGCCATTCGTCATGCAAGCTTGGTGGCTATCGAA  
AATGTGTCGCGAGAAGGGATCGGTATTTTTGTTGTTACTGAAGAAAATGGAGGGACTATTTCTCTTGGCG  
AGTATTTGTCTGGAAGGAACTGTCTGAAGAAGAAGTAGTGCATTTGATTCAGCAACTGTGCGATGCACT  
AGAGCTTGTGCATAGTATTGGGTAGCCCATGGTCAGATTCATTTACATTCGGTGCACGTTTCTTTCTTT  
AATGGATAGCTAATATCTATCTTCCAGAAGTCGGCTTTGCTTCTTTGCTCAGAGAACGCATGTTTTCCA  
CTATCATGCAGTCTGGATCAGCGCGAGAGAGTATTACACGTATTCGTGACTTGTGATGTTTTGAGGCTCC  
TGAAGAACAAGAGGCTTTGGTTCGAGAGGCCGATGTTTACTCCGTTGGTGTATTAGCTTATTATTTATTA  
GTAAGGATCTTTTCTTGGGATCTTTCCCTAAGCCTTCGCTTTGCATGCCTGATAGCTGGTATGATTGGG  
ATGGGTTTATCTTAAGTTGTTTACAACAACAACGGGAGGCTCGCCCTAAATGTTTACGAGAGGCTTTAAG  
GAGAAAGACGTCAGGAGAACAGCTGCAGGTTACGCTTGACAGCTGTCCGAGCCTCTACGTGAAATGGAA  
ATAGAAGACACTCTACAGAGTTGGGACCCCTTCGCTCTTATTCGGGAAGGAGAAAGGCTGTGTGAAG  
TTAAGGAAGAGCAGCATGCTTTTGTATTAGTAGAGGCCAAGTCGATCGATGAGGCGATGGTTACCCTGT  
AGATTCAGAGGAAGAGCTTGAGAGTAGCGAGGGATATGCGAACCCCTTCAATCCCTGTTAGCAAGGGAG  
CCTGTAGTGAATCGCTATGTAGAAGTGGAAAGAGAAGAGATTAAGCCGCAACCATTATTGACGGAAATGA  
TCTTCATTGAGGGAGGGGAGTTCTCTCGAGGAAGTGGGGATGGTCAACGAGATGAGTTGCCTGTACACAA  
TATTACTTTACCAAGGTTTCTTGGACATTCATCCGTTTACCAATGAGCAGTTTGTCCGGTTTTTAA  
TGCGTAGGAAGTGAGCAAGACGAACACTACAATGAGCTCATTCGTTTGAAGATTCGAGAATTCACGTC  
GATCAGGCCGACTGATCATTGAGCCAAGGATGCTAAGCATCCGTGTGTAGGAGTAACTTGGTATGGAGC  
TTCTTCTTATGCTTGTGGATAGGTAAGCGGTTGCCCTCAGAAGCTGAATGGGAGGTAGCAGCCTCAGGA  
GGAAAGCTAAGGTTGCGGTACCTTACGCGGAAGAAATAGATAAAAGCAAAGCAAATTTCTTTAGTTCCG  
ATACTACTCCAGTTATGAGCTATCCCTTCTAGTATACTGGGTCTTTATGATATGGCTGGCAATGTGTATGA  
ATGGTGCCAAGACTGGTATAGTTATGATTTTTATGAGAGTTCTGCTTTAGAGCCAGATGCTCCTTTAGGG  
CCTCCTCAAGGGGTCTACCGTGTGTTGCGAGGAGGATGTTGGAAAAGTCTAAAAGATGATCTACGTTGTG

CACATCGCCATCGAAATAATCC TGGGGCTATTAACAGTACCTACGGGT TTCGTTGTGCGAAAGATGTAAA  
ATAAAGGACTGAGT ATGGGTGCTGTATCTCGAGATGATTATATTGCTTTATGCACA GAAT TAGTGGAACA  
TGACCGACGCTATTATGCGCTCAATCAACCGACGATTTCTGATTACAGCTATGATATGAAAATGCGAGAG  
CTTCAAGAAATAGAAGTTCAGCATCCGGAATGGAAGTTTCATGGTCTCCTACCATGTATTTGGGGGATC  
GTCCCTCAGGACAGTTTCCTGTGGTTCCTCATTC TAGCCCCATGTTGTCTATAGC GAATGTAT ACTCATT  
GCAAGAGCTAGAGGAATTTTTTTCCCGTACAGAAAAATTATTG GGGTACTCTCCTGGATATTC TTTAGAA  
CTCAAAATTGATGGAAT TGCTGTGCGCCATTCGGTACGAGAAGCGATTGTTTGCTCAAGCTTTGAGTCGGG  
GGAATGGGTAAAAGGAGAAGATATTACAGCTAATGTCAGTACTATACGCTCTTTACCTATGAGACTC CC  
TCAAGAGGCTCCCGA GGATCTAGAAGTGCAGGAGAAGTGTTCCTTTCATATGAAGCGTTTGAAGAGCTC  
AATGCTTGTCAACGGGAACAAGGGAACTGGAAT TTGCTAATCC TCGTAATGCAGCTGGAGGA ACTC TTA  
AGCTTTTATCTTCTAAGGAAGCTGCTAAGCGTAAATTAGACTTGTCTGTTTAT GGGT TGATCACAGATCA  
AAAAAACGCTCACATTTTGAAAATCTTCAGTTATGCTCTCAATGGGGATTTTTTCGTTGCAGGGATGCCG  
AAACAATGCCGTTTCGAGACAAGAGGTGGTAGAACGTATTCGAGAGATAGAGGAGATGCGCGCAGCGCTCC  
CGATGGCTATCGATG GAGTCGTCAATAAGTAGACAATATTGCACACCA GGATCGGCTAGGTTTGACGAG  
CAAACATTATCGTTGGGCGATAGCTTATAAATATGCTCCGAAAAGAGCAGAAAAGATTTTGGAGGAT ATT  
GTCGTTCAAGTAGGGAAAACGGGTATTC TTA CTCCGTTGCC GAGT TAGCTCCTGTTTTTTTTATCTGGGA  
GCCGCGTGTCCAGAGC ATCC TTATAACAACCAGGATGAGATTGAAAAAAAAGATATTCGCATCGGAGATTC  
GGTGTATGTCGAAAAGGAGGAGAGGTTATTC CCAAAATTGTTGGGATTAATTTGGCTAAGCGTTCATTA  
GAGAGCGAGCCTTGAAAATGCCAAGCCTGTGTCTGTATGTCATGAACCTGTTGTTAAAGAGAAGGTGT  
CGGTGCGTTGTATCA ATCCACTTTGTTTCAGGGGGGATGCTAGAAAAGATCTGTTTCTTTGCAAGTAAGAG  
CGCTTAAACATAGATCATTTGGGAGAGAAGGTGTAACATAAATTATTCGAAGTAGGTCTCATTAGTTCT  
TGTTCCGGATATATTTGCTCTTACAGAAGAAGATTTGAAACAGGTCCCTGGGT TTAAGATCGTCTATAC  
AGAATTTATTGGCAAGCATTGCCGGAGCCAAAAGGTGGCATTAGATCGGCTTTTAACGGCTCTTTCT AT  
TCCTTTTGTGGGGAGCTCTGGTGCCATAGCTCTGGCAGACCCTTTGGA ACTCTGGACAAAGTAATCGAA  
GCTTCTTTAGATGAGCTGATGTCTATAGAGGGGAT TGGTCC TAAGGTAGCTGCATCGATCGTCGCTTCT  
TCTCGAAACATGA GAATAGAGAGGAAATTCGTCGGATGCAAGAGCTAG GAGTTCAGGTTCTTTCTAAGCA  
ATCCGATAAAGAGGCTCCTTTACAAGGAAAAGTGTTTGTTCTTACGGGGACTCTCCAACAGATGACGAGA  
ACGCAAGCAGAGGAGCGT ATCCGCTCCCTAGGGGGGAAAGTGAAGCTCTTCGGTATCGAAGAGCACATATG  
CCGTCATAGCGGGTAGCGAAGCTGGGGTAAATTGAAAAAAGCTCAAGATTTAGGTTTAAGTATTTGGAA  
CGAGAGCAAATTATCA GAATTC TTGACGCAAAATCGGTCTCCTGAAAAC GAGT TTTTTTCTAAGAGACA  
GCCTAAGTTAACCGAGATTTATATGTGA GAATATGGTATAATACTTCCTTCAAAAATAGTTTTTTCAGGAA  
AGTATGGC GAATCCGTCTACACCC CCATCCAATCATTC CGGCCTTTCTTTACAAGGTGCTTTAAGAGCTT  
CAAGTCAGCAATGTACGCAGGCCGACAAGGGG ACCCTCAACCTTTGAGTCCA GAGTCCAGAGGCTTGAC  
CTCAAATTTTCT ACTCGGCAGATTTAATTGATGTTGTAGAG GAGTCTATAGAGACCGCTAAGGGCAGC  
GAGCTTAAAAA ACTTC GAATATATGAGATTGCTCTAAAGATTC TTACAATTATTGGAGCCGCGATTC TCT  
TCGCTGTTCTCTTTGTATGTTGCTCGGTGTACCTTTAT GGATTC CTATTGTAACGTGTATCGGTGTAGG  
AAT TGCTTTTAGTATCGCCAAA GGATGCTTACAGAAAAGATGTCAGCAGATTC GAGAAGAATATCGTGCT  
CTACATCTCTATCATCGCTATCTACTTTCCAACAAAGATTC CATTGATGGGACTCTTTT GAGTCGCTTCG  
ATATCCGTTTTTCGAAAAGCGGAAGAGAAATTACACGGGT TAGATCTTGATAAAAAGAGAGGCTAATCATCC  
ACTAGAAGCGGACAAGAGATATGATTTTGCCGGGT TGGCTCATCAACGCTACCAGGTGGATGCAGCTCTT  
GGAATCTCTAGTAGCCAAGACGCTTTTTGGAGAGGGGT TGCTCAGCAGGTAAAATCTGTTAAGGACGATG  
TTGTTTTAGGGGAT AAGGC GAGTACAGATCTGT ACCCGATAGCGCAACAGGCTCTACAAGCAGCGGGGT  
AGGTTTCTCTGGCGCTGCAGGGAAA GAGTCTTTGTTGGATCTAGCAAAATCTTTATCCAGTCTGTTTGC  
TG GGGT TCTCAAGTCGGCAAAGACTCTCACGAAGCTTTACAGCGATATCAAATGCGCTTTTTAAGTAGTC  
CCATCTTAGCTACGTGGTGTGGAGCTGGGT TTTCCACATCTGCTCAGGATTTTGTCTTAAAGGTAAGAA  
TGCTTTAGATATTGCTAGTGA AAAATCATACAAAGATGCA GAATGCTATCAAATGTGTGCAGCTAGTTTCC  
GTTTTAGGCAAAAATGAGAAATTGGAAAGAGAAGATTGAT ACTCTAATCCAAAACAAAATCTTGATCAAG  
ACTCTCTACGAAA ACTGTACCAAGACATTGAAAAAGCTATGCATAAGGTTTGTATCGAAGATGGGT TTC  
CGCTCTATACAGGCTC GGGT GCGTAAGGTCACACAAAATATTTACGACAAGATTTACAAGAGCTTCTT  
AATAAGAAAGCACCATTAAATGAAAGCGATCTTTCTAAAATGCAAAAAGGCATTAGTTTCGTGTGCTAATC  
TTGTTGTACACTCTTAGAAAAGCCAGTTAGGAAT TTCGGAGCAGACTTCTATAAAAAGAAGTCGAAGA GAG  
TATTTACCGAGACTTGATCGATACTATTTTACAAAATGGGAAGTGCGGCAGGAG GAGT GACACCATTAGTT  
GATGGTGTACATAAAGCTATTAGAGAAGGAAAAACTTTACGTAGCGAACTTAGCCGGGCTATGCTTTTAC

ATCC AAGACAATCTTTCCTAGGGGTGCAATCTGCTGTAGAGAAGTTGCAAGCATTATCCGAGATCC TAA  
GTGGGGAGCATCGGCAGTGCATACCTCTGCTGAAGAGACTCTAGCGCAAAAACAGAAGTTTGTTCCTGAT  
CTTACGCGCATCCAAACGAGCCTAGCAGACTGGAGAGAAGTTACGGGCTATTTGAAGAGACAAAAGTGA  
ATCACATTGTGTCTACGGACTTTGTATCGAGAACAGAAGCTTTTCTAGATACCC TGAAAAACGTTGCTGA  
AGCATGTTCTCTGGAGCAAGCTGTTGCAGAGCTCAAAGATTGTGAGGATGCTATGAAAGCAGATCTC ACT  
CATGTTGAGCAAAAAATGAATCC TACAGAGATA GAGTCTGCAAGAGAA GAGT TTAAGCAGTTGATGGAAG  
AGCTAGCTGGTATTC AAGAGCAGCTAGAACAGATCGCTCGACCTATTTATGAAGAAGGGGT AAGCGGTAA  
ACGCTTCTACTTAATACAGTCTTCTCTCATCCAGAAGCATTACGTAAGAAAGTTCAAGCAAAAAGAAACC  
TTGTTAGAGGCTTTAACAAGGGCGAACAGCCTTCTCCAACGAAGAAGAAAACGTTGAAGCAGCTTTCTG  
AAGGATGTGAGTACTTCTCTAGTCTTGTAAGCAAGATTAATGCGGTTAAGACAATATTAGAAGGTTCTAG  
AGGCAAGAAAATTGCGTCCCAAGATATACGACAGCTGATTGGAT TGACTGATGAGCTTGCTCTAAAGTTG  
TCCTCTTTCCAACA GGATTC TTTAGA GAGT TTTGCTCTAT GGAT TAGAGGGGT TAAGC ATTC CAGCTGCTT  
CTATAGAACAGAAGAAA GGAT CTCTAAGTCTTCTTCTATAGCAGAGAAGGTGGTGTATGCTTCTCATCA  
GCGTGTCTATAATGGGT AAAAGCGAAAGTGAAT CGCACATTAGAAGCATTTCACAGCTGATCAAAGGC  
CTACGAGGATCTTTACGTAATGCGATGATCACTAAAGCTGTTGTAGCGGCGATTC TCTCTGTAGCTTTTT  
CCTGCC TAGCGATTGCGCTCTTCTCTGTGCAGCTTACATGGCTTCCTATTATGCTCTGCGTTTTAGCTTT  
GGTATTGGAAGCTATCC CTTCTGCTTTATCTATTTGGGTGGAGAAAAGAAAAGTGGAAATATGAGGTTGCC  
TCTTTAGCGAAGCAGTTGGTTTTGGATGGAAGAAAAGCTTCCCTATCCAGATTTGGGGGATCAAAAATATCA  
AGCATCTAGAGAAGATTCGAGATGTTTATGGGCTGGATGGTGTGCGAAT TACGGGTAGCTGAAGCAGC  
TTTATTAGGAGTTCAGAACTTCTGAAGAGCAAAAACAAGAATCTTTAAAAAGTGCCTGTTAAAGCATTG  
CGGGCGGATGCGAAGGTTCTTAATAAGAAATTTAAGAAGCTTCCCTGAGTCATATCAGCCTCAACACTCTG  
AAGTCACAGGAGTCCAAGGTGTAACGGAACAAGAAAGCAGGGATGACGTTTTGGTAGCACAAAGATATGGC  
TGCCATAGAAGAGTTGCAAGACCAGTATCATGCAGCTTGCTTGCAATTTGAGTCTGTGAGCATGCGATTT  
TTAGCCGAACAGCGTAAAGCTAAGTTTCTGGAAGAGCTGTTAATTC AAAAACGTCGAGATGTGTCCCATT  
TATCTCATCAAGAAGCTCATTATACTCAAGTAGTCAGTCATTTGAAAGAGCGCATCTCAATGAGAAAAGG  
AGCATCTACTCAACAGCTTCTAAAGAAGAGATTTCTACAAAAATGAGAGAGCTGTTGTCTTTAGATGAT  
CAACTTCTAAAAGCTCATAACAGCTCAAGATGTGAAGTGGAT AATAGCATAAACGGTCAACTGCAACAGC  
AGTTTAAAAAGTTATCTGAAGAAGGAAGCCTACAAAAAGTAAAAGCTCTGCTAGAACTAAATATGTGTTT  
AGGTAATGCTGGGCAAACCC TTTATCATTC AAGGCTAAAGAGAGAGGTTTTTCGAAGCATCTTGCTCTAAC  
ACCTCTCAGCAACTTCTTCAATACGGTGAAGATCTGTTTGCATCTTACGATGGAAGTGATCGATCGGCTC  
TTCTACGTTTTGTTTTAGGATCTGGATATGAGATGATCAGTGAGGCCAGCTCTGAGCTGAAGTCTCTACG  
CAAACGTTGGAAGAAGCGCTTCTCAAGCCGCAATTGCTCCTGAAGATTATGAGAAAGTCTGCA GAGTG  
TTAGAACGTTTTCTTAAAGCGCGAGACAGTCTGCGTCCGAAGTTAGGCTTACCTCTTGGAAGAGCTCAG  
ATGCTACCGTTGGTTACAACATCAAATACGAGATAATCAACGAGTTAAAGCTC GAGT AACCGCTTGTTA  
CCAAGA GAGTTGCAGAAATGTTTTACAGCATTTAGAAGATTGGGTGCGGAAAACGCGACAGGAGTCGGCA  
GAATGTCAAAAAGTAGAAAACAAAATACGCGAGTCTGCCAAAAGCCGGATCTAAGGAGAATCTTGCTG  
AATCTACAGAGATGCTATTTTCTAGCTTAGAAGAAGATTTGAATAAAATACCTCTAGATGTTTTGCGTGC  
TATTTTACGATCTTTATCTTCTAAAGTTCTTCATATTAGGGATCAAAGTTAGAAGTTGAAAAGTTAGAA  
GAGCAGTTTGCGAAGACAAATATTTGTAAGGCAAGGAAGCTGAGTTCGAGAA GAATGGGGAAGTGT  
GGCATAATCAGTATCAGATGCTAAAAGTCAGATGGAGAAGCTGAGTCTCAGAAAAGAAGACTGACAGA  
TAAGAAA GAATAAAAAAGGAGGGCTGCTAAAGCCCCCTTTTTAGTTAGGATACAGATGTATAGAACAGA  
CTTGTTAATTAGCATTTTCTGCAGCAAAAATACGAAGCAAATAAGAAATTAGCTCATGCAACTTGAATG  
TGTGCGTTCTATATCC AATATAACGATCAGGACGAATGATAAACAA GGATTC TGGGTGGCGTGGTATAA  
CTTGTTGACTTTAGGATCC TCGGTGACAATCACGCTTACCCATTCGCCATATTC TTCTAGAAGAGCGTGG  
ACTAGATCGGGACGTTCTTTGAAAAAGACAAGTAGATGTTTAGCATTTTTTAAAGGAATCTAATAGATAAT  
TCCAGTGTCTAACCGTATGTCTAAAGCTCGTATCCCGGTCTAGGGCCTTGGATTTCTTTATCATTAGG  
AGACACTTTAATAATATCACTAGCTTCATATTTGATGCGCGGTGGGAGGGATAGTATAGCTCTCCTTCC  
GCAGCATCGAGCTGCTTACACCCCTTAAGGTAATAGTACATCAGGGCTGGAGTATACATGTTTGAAAAA  
GAAGCTTGGTAGCTCTTTTCTGATGGACCTCATTTAAATGAGGCAATACATGGCTCGTTTTTAGTCTTT  
GGAAA GGATCAATTGGGAAGAAGCGGCTTTTTTAATTAAGTGGCAGGAGCTTCCACCC TAGATTTAAAGCG  
TCATGGATATTGGAATTTACTCCGACAGGTAAGAAAA GGATAGATTATTAGCAATGCTCCCCAAGAAAA  
TATAACGGTCATGACAAAAAGGATACTGTAGAAGAGATGAGGAAATGGAGAGA GGATCC TCTGCTAGCGC  
AAGGCTATAGGTATACAGAAGTTTATTTTTAAATTTAGAAGAAAAGAGAGCCAGAGGATTTGCGAGGTAT

AGCTGACGAGAGCCTCTGTAA**GGGT**TATAAAAAACAAAATTAACAAAGCTTTTTGTAACAGGGAGCAAGT  
**GAAT**ATGAG**ATTCTT**CAAAGGCTCCCCCTCCTCACAACTACAAAAAGAGCTTCCTTAT**GGAT**TTTTTT  
TGTTTTGATTTGTGTTTTGAGGAGATCTTTAAGATCG**GGAT**CAGC**ATCC**ATTTACAAGCTATA**ATCC**AT  
TTAG**GAGT**AAAGATCTCTCGTCCTTCATAGACTTGTGAAGAGCTCTTTGTGCTTTCAATAAATAG**ATTCT**  
GCTCTACTT**GGGT**AACTGGGCGGTAGCC**ATTCT**ACCACACCGCCTAACCTTTCAA**ACTCTT**C**GAGT**AA  
AT**GGGT**CACCA**ATTCT**GTTATAAGAAAATTAATAAAGAAAAGGGCAACGAGAGGCTGATGATTGATTGAAC  
TTAAAAAGAACAGTACGTTGTTCCAGTGATAGCGAGCCCCAAAAATTTTTCGCCCTTTATCAAGTAAAT  
CTCCAATAGATTGATATTATCAAGAAGTTCTAAAAGAAGATGATGACAAACTACTGGCAGAG**GAGT**GCAG  
GGGAGCGGAAGAGAGGCTGTTATGCTATCTCGA**GAGT**CTATTACTTTAATACGGGCTCTGTGCTGTTGC  
AAAATGCTAGCAA**GGAT**CAGTCCCGAG**GGAT**TGGCTCCCATGATTAAAACATCGATCATTGTT**ATCC**TCA  
CAAGCAAAAATGTACTTTTTCTCTCAGAGAAAACCTTACCTTGAAGGAG**GGAT**AGAACTACGTTTGTGC  
CTAGTGGAGAAGTAT**ACTC**GAGAAGCTTTTTAAAAAG**GAAT**CTCGA**GGAT**ATAAAAACCTAGTGTGGCTAAT  
GGAAGAGAAAAGAGAGGCTGA**ACCC**AGCCTCTCTACGAAAACAACTATTAAAGATTTGATTGGAAATGC  
GTTAAGATTTCTGCAAACCTCTTGGCGATAAGGAGATAAAGCGATTTTCATGGG**GAGT**TTCC**GGGT****AA**  
**TC**TTAGACAGCATTGCGCTGGAGCAGCCCTAAAAATAGGCGTTGGTGAGCCGTAGAACTACGCGATC  
TTCTAGTCTTGTGGTGGAGAACGG**GGATTCT**TTCTGGTAA**GGAT**AGCAGGA**GGAT**GTG**ATCC**TGAATA  
CCTAAGAAGAAATCGATATCATCTCGACACAGCTTGAGGGGAAGTGT**GAATCC**AAATGCTTT**ACCCA**  
CTTC**ACCC**AT**ATCC**GAAAAC**GGGT**CATGGTTAGCCAATAGTAGCACAGATCTCTTTGAGAA**GGAT**G**AC**  
**TC**CGTCAGCAATAGGAGCCAGACGGAGATGGCTTGAACCGTATAGTCTCTAGGTCTATAGGTGCTAGCC  
AGAT**GAAT**GGTAGTGTGACAACCTAAGGAA**ACTC**CTGCAATACCAATGCGGTGAG**GGGT**TGACTTCT**GGGT**  
ATTTAGCTACGGTGGCTAAGATATCTTCGCCGTTGCGCAGGTAGTTCGTGCAG**GGAT**TTGATCACAT**AT**  
**TC**CTTCGCTATTTCCACAGCCAGCCATAT**GAAT**CTGGCTACAGC**ATTCT**CATTTGCCGTAAGAAGCGG  
GCTAAGTCTCGATAG**ACCC**AT**TC**TTCCCTGTACAATTTCCGCG**GAATCC**ATGGAAAAGATTACAGTAG  
**GATATCC**TCCTAGAGGCATAG**GAGT**GGTTGGGGTATGGAACATAACCAACTAAATTAT**ATCC**GCAGCTGAG  
AACATTAACACCACGGCAATGCTCTTGAAGACCTA**ATTCT**CTTATCATTGATAGTAATGTAGGTTTCAG**GA**  
**AT**AGAGGGAA**ACCC**AGGCGCTTCAACAGGAGCTGCAAACCACTTCCAGATAAG**GAGT**ACACACAGGAAAG  
TAGCAAACTTTTTCATCTAGAAAAGCCCTTTATTTTTTCAAAAAGCTTCTAAAAGAAGCGTTGATTTCTG  
CATATTT**CGATTCT**AAACAAGAAACGATGGCAGAACATAATAAGGTAATTA**ACTGGAT**AAAACA**ACTCT**TTT  
TTGCCTGGCATCAAATAATTATTTGTGCTTTTAGGTGTAAGAGAAGAA**GGAT**TTTTTTATCAAAAAATCA  
TTTTCTCACCGTGTCTAAAGTATGCGACCAGTATGTATAGTCTTATTAAAAAAGATATTGCTAG**GAAT**TTA  
GGTAAGATCTTGGTTCAGAAAGTGAAACGTTATGA**GGGT**CTCTTT**GAAT**AAATGCGAGAGCAGATCTTGA  
TTATTTTTGAAAATAGGTATAGCATGGGGGCTCATTTAGCATTTTCTTGAGAAAAGTT**CTATCC**ATGGCC  
AGCAAAAACCGCAAATTATCAAATGAAAAGTACCGAAAGTTCTGAAATGTATTGGACTGTTAAAAATA  
AAAAAAAACAAGCGGTGACTAGAACTTAAAAAGTATGATAGAAAGCTGCGTAAGCAGTTATCTTCAA  
AGAAGCTAAGTAGGCTTTTATCTAGCTTCTAAG**ATTCT**CAA**GGGT**GTCATGAAGTTA**GAAT**TATTATTAG  
CCTTTAAGTATCTA**ATTCT**CAAAAAGAAAAGACTTTCCCTTCCATAGTTTCTGCTTTTTCTATAG**GGAT**  
CGTTGCTCTTGTGTTTGGCTGTCCGTGGTTTTCATGTCCGT**ATCC**AC**GGAT**TGCAGCAAAGAT**GGGT**G  
GGAGACCTCGTAGTTTAC**ATTCT**CTCTATTA**GGAT**CGAACCTTCCAGATAAGTACTAT**GAGT**CTTACTACT  
ATCAAATAG**ACTCT**TCACGCAGAAGCTTCGCAATATATTTATAAACTATAGGGGAGAACTTCTCTGTGA  
ACAGAC**GGATCC**TTATG**ATCCGGAT**GTAGATTTTTACTTCCAGAAGCTTTTCC**GGATCC****GAGT**TTTT**CG**  
**GAT**AACGGTGAGATGATAG**ATCC**TGTTTCGTACAGCCAATGAAA**GAAT**GCTTTCCCTGTTTTCTCTCGGA  
AAGGCTCTTTTGT**GAGT**TTGAAGAAG**GAAT**GGGACATGTGCACAT**GGAT**AGAGCTTTTCGGGGGCATAA  
AGGAGAACCTCGAGCCTTATCTCAGTATATCGCGT**ATTCT**CATCAGAC**ATCC**TTTACCAACAGC**GAGT**GCTT  
CCTTTTGAGGAAACCGATT**ATTCT**GACTGAAGTGT**GAAT**CGTTTTAATGCTTCTTCTGAAGGCTGTTGG  
**GGAT**TTTTCTTGTCTTCAAGAGAA**ATTCT**CGAGGTATGTCCGT**ATTCT**TTGCCTGTTGTATATCGCGACCA  
**AGGGT**ATC**GAGT**TGG**GGAT**ACAGCGTCCTTGTCTGTCTTCTCTGTAAAAAAGAAGGTGAGGTCC**ATTCT**  
CCTTTGC**GAGT**AA**TCGGATTCT**TATA**ATCC**TGGTGTGTCTCCATTTGGAGGGAAGACCATTTTTTATTGATA  
AG**GAAT**TGGCTGC**ATCCATCC**GCTCG**GAATCC**GAAGGGCTTGGTATGCATAATGGCTGGCAGGTATTTCT  
TCCTAGTGTTCAGAT**ATCC**CTGT**ATCC**ATGAAACAGTCT**ATTCT**AGAAGAT**ATTCT**AG**GAAT**CGGAAGTCTCT  
TCTTATGGGAAATCTCTTCCCTTATATGATTAT**GAGT**TTTTTAAGCCTATCTTAGATCAGCTTCAAAGTG  
ATCAAGTTTTGTTTTCAATCGTTTCTTTTATTGTATTGATTGTTGCCTGCTCTAATATTGTGACTATGTC  
T**ATCC**TATTAGT**GAAT**AATAAGAAGAAGGAAATCGGC**ATCC**TGAAAGCAAT**GGGT**GTTTCTTCTTCTCGG  
CTGCAATTGGTGT**GGAT**TATGTGGAGCTTGTTCAGGGCTAGTTGGAGCTCTAT**GGGT**CGATTTTAG



CTGCATTAACCC TAAAAAATTTAGGGT TTTGACGCATTGGTTAAGCAAATTGCAAGGAAGAGAAGCTTT  
TAATCCATCC TTCTTTGGCGAACA ACTC CCTCAAGATTTTACCTTCCAACGTAAATTTGTTTATCATT  
GGAGCGCTTGTCTTAGCAGCTATTTCCGGAGCAATCC CAGCACAGCATGTTGCACGCATGCAGGTTTCTG  
ACATTTTAAAATCTGAGTAGAACTATGGTTATTC TTGTTGAGGCGAAACATATTTCGAAAGTGATCCAGC  
AACAAGATGTCTGTATTC CCATATTTAAAAGATGTATCC TTTCAATTACACGCAGGGGAAGTAGTGGCTAT  
TACAGGAGCTTCTGGTAGTGGCAAAAAGTTCGCTCTTACATCTTTTAGGTACTC TAGACCAACC GAGT TCT  
GGCAGATATTATTTTTTGGTAAACAGGTCCGTCGTGAAGA ACTC CCTATTTTTTCGAAACTGTAGGATAG  
GAT TTATTTTTCCAAAATTTTTTATTGCTAGAAGATGATTC AGTGATTAACAACGTTTTGATGCCTGCACA  
AATTGCAAGGAA GGAT ACTGGGCAGAAATCTAAAGCTCGAGAAAAGAGCTCTTGCGTTACTAGAATCC GTA  
GGGCTGGT GGAT CGGCGCGATGAAAAAGG GAGT CTCTCTCTGGAGGAGAAAAACAAA GGGT AGCTATAG  
CGCGAGCTCTAATGAACG ATCC GGAGATTGTATTAGCAGACGAACCTTCTGGAAAATTTAGACCATCGGAC  
TGC GGATACAATTC ACGAACTGTTATTAGCTCTTGCAGAGAAGCATCGTGGGGT ATTGATTGTGACTCAT  
GATCGGGAAGTAGCTGAAAAGTGCCACCGAGAAGAG ATTC TCCGCGATGGCACCTTAATGCAGCGACAGT  
AGACATTTGAGACGGGA ACCC CTCAGGTTCCCTTGAAAGACACGGTC ACCC CTAAC TACC ATCC GGGAAT  
GATTAGACGCTTCCGTCCCCTT ACCC AAACATCTACACGCTCAGGCTATCACAAGAGC GAAT AAGTTGTA  
AAGCATTC GTTATCAATAACCTGAAGATTTTTTAATAATAAAGATAGCATCTTCACAGTTCGTTGTACGC  
GT GAGT GTACCAT GGGT ATCTTTAAGAG GAGT TGTGCTAGATACTTTCCGCTGGAAACATGTTTTAGTC  
GCACCTCGTCTCC ATCC CGGAG GAAT TGATCTTGTGTAGTATTTAAC TTTTCAACA ATCC ACCC ACAACG  
CGTT GGGT AGTACGTGTTATCAAAGTACGCCTCTTTTGCATTTCCATAGAAAAGATAGATAGGGGAAACTA  
GCAAATTC GCTACCAAAAATTTTTTGTG GAAT AGGCAAGG ACCC GAGGAAGCAATACGATTGGTTTAATA  
TTTTTTGCGAAGCATGTTCAATTATTATCTACACAAAATAGAAAACGATAGGGGT TGCCGAAGAACGTT  
TCTTAATGTTGGGAACAAATAAGGAAGCGTAGACCACGAAGCAACGTAAGGAGT ACTGACTACAAGAGGA  
GAGT GGGCAGCTTCTAAGGTA AACAGGAAGAAGGAT TATCG ATTC CTGATGTAAATGTAGTACGTTCTC  
CTCGCTCATCTACTTTATGTTCTTTGAGATAG ACTCGAAT CGCTTGTGAAGAG ATTC TCGTTTATTAGA  
GAGCTCTGCAGCACCGATATTAGGAAAATGGAGAGGAAGTAGTAA ATTC GTTATAGGTTGTAAAGAAACC  
TGGAT AGGAACAGGTTCCAGGTGCACACTTCCGACCAATCTTTAAAGTCTAAACGTTCTGCATGAACCG  
AAGGTAAGACCGTTCCCTCCTAAAAATACCGTATGAGAAGAAGACGTGGAGCTATAGCTG GAGTATCCAGA  
TTC TGTGCTGCT GGAT ACAGAACCTTTTTAATAGAGAGT TGGCTGCTGCGGTTTCTAAGGAGATCTTTTTG  
CTATGTAG ATCC TCCACCTGTTCAAAGATAGTTTGAGCACTTGAAACCT ATCC CTCCAAAAGTTGCTG  
ATGCAATATAGTGTGTTCC GAAT TTTT GAAT AAACGCTGACCAG GAAT CTGGAGAAT TGGCGCTTAGTTT  
GTTTTCA ATCC AATTGCGGAAACAAC TATCTAATCGTTTTTTCAGAG GGGT TCGAGCTGTCATCTTCTTTG  
AGT GTGTATAGG GAAT GAGCGGCTGTGGAACATGTACGGT ATTC TTGGCATGTT GAGT GCTTTTTTTTA  
CAAATC GCAGGTAAGACTTCC TGAAGGCGGCTGCTT CAGAAAG ATCC AAATCAG AATCTTCG GAATG  
GGAT GTGGAT GAGAGGCTGCATGCTTCCGAGAAAAAGAAAAGGTTGTTTTCTTTCAATTTGATAAATA  
TGATAGTCA TCC AAGCTGCGTTGAAAGCCTGATTTGATTTTCTTAATTACATAAGCTTGTCTGATTTGG  
ATT GAAT CTTGAAAAT ATCC ATATCGATTAATACAGCTGCAATCGTATG GGATCC TACTTGAAT CTGGTA  
ATTGTA TCTCG ATTC TGT GAATCC TTGTAAGTCTAGACGGACGCTTCCCTCGGTGAGGAT TTGGCTTTTA  
GCCCATGTCGCCATAAC ATTC CAAAGGCAAGCTTGTTAATCAAGATCTTAGCCTCTCTTTTGTATCGTT  
TAACAATATCGACTAGTTTAGGA GAGT AGCTTGG GAAT AAGTGTTTTT GAAT AACACAAATTTCTTTTTG  
ACCATTTTCTACTATGGGAGGGCTTTGAAGAGGCATAGTCGCCGCGAGGTCTGGTACACTAAAAGTAACC  
GATGCAGAAAAACTTC GAGT AAATGAAGTTGTTCTTTCGAAAATGGAGGTA CTGATTTCTACATCAAAG  
AAGGTTTAGAGAAT AGCTTAGTCCCTGGAGGAAT ACCAAAACGACC ATCC GCGCTCAGCTGAGCCGTTTC  
TCTTGTA AAAAGAGT AATCTAGAATATTC TCTTCGTTACGGT ATTC AGGATATTAATGGGGTCTAATTTG  
ACAATGTCAACAGCTCT ACCC AAAAAGTGCACATGCG GAAT CAATTC AATATCGTTATCGACTAGAGCAA  
CCTTAG GAGT TTTCTTTTCTGGAGAGAA GGATTC TCTGGTGATGCGATATTTACACCGTCATGAGAGCT  
GCGTAATAACGCTTGCTTAATTTCTTCTAGGAGCTCCGCATC GGAT TTCATTTGTATAGAAGGGGCTACC  
AGGCAAGTGGCTGCGCAAGCTGA GAGT TTTGGGT TCAA GAAT AGTGAACAGAGCGCCGTCTTTAGTTGTCT  
CCCAAGATAAAAATATAGGGGCTATTTGAAATCGCGGTTTCCATGAAAGAAGGTATATCGAAGATCTCCAG  
TGGCAA ACTC TCAATGAACGATGCTAGGCGGTTTCTTCTTCGATATAAGTATCT GAGT CTATAGAGAAA  
CGTCTAATCGT GGAT TAAATACGGAAAAAGGTT GAAT AACGTATAAGAAAGGAAAGGCTTAGTCATTA AAA  
ACTC TCCGGGCTGGACAGTGATTGAC ACCC TATAATGGAAGGAACTTGCTTTAAAGAAAAGCAAAGAAAC  
TGATGAGGAGCTTAGCCTCT ATTC AATCACTTCCCTATTAGGA GAGT CGATCACTGTTTGCCGTAAAGGG  
TTTATAATGTGTGGTTTGCTGTGCTTTTGTTCCTA ATCC TATTTTCTCATAAC GGAT AGCTTGCTGGCT

GGTACTCGGTTGTTTCGTCATCAGAATCTGTATCTTGTTGAGTAGGTCTACTTGAAGGAGTAGGGGCCGTA  
AGCACGCTCTCTGGGACAGATAGGAGCTATTTGTTTCTAGAAGAGACCAGACGTCCATAAAGGCCGTA  
GCTGTGTCTCTGTAATTGGGCGAAGGATGAATAGGTCTTCAAAGTTTTTAATCATAACCAGCACCGCTCCA  
GTTAGCAGAGCCAAAGATTGGAGT TTTATTGTGCGATGCAACAAATCTTGGTATGGAATGCCTTCTGTT  
TTTCTTTCGTAAGAGGAAGTTGGATACCCAATTTGCTCAGTAGTTTGCATGTATCTTGTGTTGGAATGGT  
TGTCGATGATTACTTTTACTCGAACTCCTCTTCGCATAGCTTGGGCAAGAGCTAAGAAATTC TGGGCT  
TAAGAAGATATACATCAAGACAAAAATACTGTCCGTTGCTTGGTTAATTGCATTC AAAATCATTTTTGAT  
GCTGCATTAGGAATCAAACGCTGGATAGGAATGTAATTGAGCAGCTGAGGTCCGACATGAACCAGTTGG  
GTCTTTCAGAAAAGACTGCGTCATGTAATTCGAACTTTCTATACATGCCGTCACGTTGACATCGTGATT  
GAGAGACAAGTCCGTGTAGTTGGCTGATCCTGTAACTACTGTTTGGAAATCAGCCAACATAGTTTTTTAT  
GTTGGAAGGT TCTCCGTTAGTCGGACGCAAGACGACTCTCAGGT TTTGACATGCTACAGGTAAGCTTTC  
TCCGCAATGGTATTTGACTTCTACAGGAACATGGTGCAGAGTCTGAATTAGAGATTGGATAATGTCATCA  
GATGATATGGCGTAAATGCGCATAAATATCCCTCTTTGAGCTTGGC GAATGGTATCGCAAATCATTCTTA  
GAGGAT TATTATTC TGCTGCTGATGTACGGAATGGAATGTAATCAACTCTCTTTCTGCAAGTGGATGAGG  
CACAGGACGCTCTTGCAATTGAGGGAGT GCGCTTGATTGAGATCGCGTAACATGATGTCTTGATGATGAG  
GAATGCCGATGTGAGCGAGATTCGTGATGACGGGCACGTTCAAGGTGTCTGCTAGAGCGAGAACCCTGTTT  
TGGAAAGATTCGCGCTAGATGAAAAGTGCCCTAGAGCCTACCGTTTCAATGCGAGAAGATGAAGAGGTTTC  
TCCATGGCGATGGTAGCGGTGTGCGGAGGAGCTTCCAGTAGTTTCTCTTAGTGGAAGT TCCGAGACTCG  
GACGATTTGTCGGAAGGCTGTGAAGATCGATAAGCTTTGAAACGGACCGAGCTGTAGGAGATGATTCGTC  
AGAAATGGCGAGGTGAATGTGCGCGCGATGCGGATGAGAATAGCTAGAATCTTAGGATGTAAGTGG  
CTATGCCCTGATGAACCATGAATGCTCATAATATATTTTACCTAATTTATTAAGGTTTAGATGCTTTCC  
TCTGAGAAGGCAGGAACTTGCCCTTCTTTTCGACTACAAAATCTCATTCTGTTACTGCTGTTCTGCTGAT  
GTGGAAGCATTCTTTCGCTT GAGTAGAAGAAGAGGTTTGCTTGGGTCTGTTATGGATTTTTTCTCT  
TCTCATGTAATGAATCAGCTCTTTAGTCATCAATCTACTGTTTGTCTTATATATGCCCAAAGCTCGTT  
ATAGCATTTCGAGTTGTGTCTCTGTAAGCGGATGATAATCAAGAATCTTCCAGATTTAATGTAAGACCT  
CCTCTACTCCAGTTGACGGATCC TATAATGAGTGTGAGCTATCAATACAGCAGACTTTGGTATGCAGAA  
TGCCCTTCGCATGTACGTTCTCGTAGGACAATGCCGTTAGCCTCGAGGATAGCTTTGACGCATAAGTCTCT  
TCGTATTTGACTTAGCGAATAGTAGGATACTTGTGCGAGCCTACTCGCACCTCTCCTCGATCGTGTGCG  
AAAGCCCAGCGATATAGGTGTTGCTAAATATTTTAGCCGTTAAGTTTACATCTTTTTCAAGAGAGCCCT  
CTGTATAGTTTGTGTTCCCGTAACGACAATATTTATGTCTATAAGAAAGGTT TTTTCTATGTAAAAGAGA  
ACACCTCTTCGAGGTCTAAACTGCACATTTCCCTCAGTACAGTGTTTTTGAAAAGGCCCATTTGATAG  
TGTACGGAGACAGGCGCTCTATTAGAAGCCTCAGCTAAGGCTGCAAATTC TGGGGGATCCGATATTA  
ATACTTTAATAGAACGCTGCGCTTAGCTTGTGAAT TGTTCACAAATCATTTCACAGGTTCTGTTATT  
TCTTTGCTGATGAGCAGAGTAGAGTGGATCAGTTCGTGATGCTGTAAAGAGTCTAGGTACGACTTGGCTC  
GAAGAAGATCGGGCTCGTTTAGAGGAGGAAGAAGAAGTGTCTTCGGGAGTCTTGTGTTTTCTCTTGGAGC  
CGGCGAGCATTGCTGGGAGATGGATACTGAAGAGGTAGAGGGT TGAGGGGAAGGACTTCTATCGTCTG  
TCTTGATCGTGATGATGAAATTCATTC TCGAGATTTGTATTGCGAAGGAGTGGGCGACGGTCTCA  
GGAGAAGAGATGTTACGCGATGACGTAAGTGGGAGCGAGGGT TCGTATAGACGCGAACAGGTTGTCTGT  
TCCTTCCATGATCGTATTCATAGCAAACAACAGGAGGGGTCTATGGGTGCGATTC CGTTTGTAAATTC  
ATCTATAGCCTGGATACAGTATCTTGGTGAAGAGGGT TTCGAGGCAAAGGGT TTCACGAATAGGT  
AGCGGAGAAGAACC GCGTGACGTA TAGAACCTGAAACGCTCATTATTTTAACTTTGTTAAATTAATTC  
GAACTATTTTAGTTTTGTTGTTGCTTTTTCAATATAGTTTATTTGTTAAAAACAAATACTTTATTTAA  
CAAAAAGTTTAAAATGAATCTTTAATATCGAAT TAAACAGGAGAATATTTTAAATAAAAAGGCCCAT  
ATTTCTTGAATTGAATGGATTTGTTTGGGTGTGAGTGGAGTCACTATGAGCAAGTCTTCAAGATTTTTAT  
GCATCCCATGGTAAGTCCAGTTTGGTGAGCCAAAATCAGAGTTGATCATCGATTAACAGATTTTTGC  
ATGCAAAGAACTACTGTTGTAACAGATTTTAAACAGTAGTAGAGCTGAGATTC TGTGTAATATGTCTAGT  
GTATGGGCGCTCTCTTTTTTATTGATTACGATAGTAATGGTTACTCCTCGTAAGCGTGCTTGTCTAAGG  
CTAAAAGATCTCGGATGAGAGAAGATATTCATAGCAATTTTTATAGTTCTCTGAGCTTTTTGAATCTC  
TTGGATGATAGGCAAGGTCTTAGTATTGGATTGAGGAAAGGGAAGTGGGTAATAGGAAATGGTTGCGAG  
CCGATAGAACTGAGCCTCAGTACCGCTCAAATTAAGAAATAGCGCCGGGT TTTGAATAGAGCTG  
TTAGGTTGATGTCTTTAAGAAAGAAGATTTAGTGATGTTAGCCGTTCCATAATGTTAGCTGATTGTC  
AATCAGTGTGTTTTCTTATGTAAGCAAATTTGAGGATGTCCTCAATTC CACATAGAGTTAGATTC  
CGATCCCAATTGGATAGATTAGGAAAGTTCATGCTGAAACAATAACCGGAATGTTGCGACGAACGGCTC

GAATTAATGCCCGAATAATTTTCAGGAGAACCAATATTTAAAAATTC TCATTGTGATTATTCGGTTAGCCTG  
TAGGATAGCATCGCATAGCATTC TTTGCGGATCGTTGTGGTTTGTGGTGAGT GAGTGGAACACAATG  
GGTTCGGATCTGCAGCTAAAAGGTGCAGTATAGGTAAGGATCTGCTTTGCTGATCACTTCTTTTGTGCG  
TTTCAATCGCTTTGTGTTTAGCCGAATAAAGATATCTGTTGCCGCTTATCCGTACGAGCAACTAAAGA  
AGAGTCTTTTGAGAGAAGGAGTATTTTGAGATGTGTGAGGGGGGGGGGGGGGGTGGATCGAGCGCGACGGCGT  
CCTCGAGAATGAGAGACTACTTTCCATTCAGATTC TTTAGGAGAATCTGTGGAAGAAGCGGGTTCGGAG  
GTTTAAAAAGATCGCTGTATTTTAAAGAAGAAAAGCCTGTACACTCATAACATTAAGGTCTGGCTAGA  
AAAGAAAGAGACCTAAATAAGAAAAGATTATAAGATAATTGTCTTTTTTTTTCTAAAAAGTTAGAAAAAGAA  
AAAATCC TTTATAACAAGATGAGT TACTTTTTATTCATCGTCGTATTTATGTTGTGCACGAGCTGACTT  
TTTTATTTTTTTAGCTGTGACTTCGCGGCTTAGGGACATAGCTTGTTCACAAAATAAAGAAGGCAGAA  
AGCTGGCTAGGTGTGCGTTGATGGATGAAGATAAGGTCTTCTATATTGATTGAAGACCTCGGACAGTCC  
AGTTCGCAGAACCTGTGATAAGGAGGTTGGTATCGATTAAACCGACTTTGCAATGGAGGAGTGCATTC TC  
TTCCACTACCACGTCACGAAGTTTGACTTTTTGAGTTGAGATCTTGCAAGGCATAGAATAGAACGGCTTTA  
TTGTGAGGGTTGACAAGCACCGTTACTTCAACCCCTCTCTGCGCCGCTTGATGAAGAGCGTGAAGGACCT  
CTTCGTGAGAGAGAACAAGCATAGCAACCGGATGGTTTTTACTGCAGATTGTACCGCTTTAAACAAC TTC  
ATCAACTCCTTGATGATTGTGGCAGTATAGACTACAGTATTC TATTTGCTGCGAGCCACCGGTAATCCAG  
CCAGATTGTTGGGAGACGACCAATTGGCCAAGAGATGGATGCGGATGATAGCAACTAGGTTGATGTCAC  
GAGA GAATGCGGCGTCAGAGAAATTCGCGGAGCCTGTAATCACTAGGCTTCCGTCAACTACTATATTTTT  
ACAGTGTAGTTCGCGCCTGGTTAGTAGCTTTGAATTTGCACGTTAGGATGTCGAATAAGGGCTTTTGGGCA  
GCAGATGTATTGATATTGTAATGGATCCGTACGCCGTTATTCGCTCGCTCTAGAAGAGCTGCAGCAATCT  
CTTCAGAAGTAAACCTATAGATTTGTATATAAATATGGTATTTTGCCTGCTTAATCGCTTGAA GAATAGC  
TCGAAGAGGAGATGGTCCAGATTC TGTAGAGAAAGGTTGTATAGCCTCTCCATGTAAATTGAAACATGGA  
GAGATGTTGGAAGGAGTGTTTTCTATAGCTTGGGTTGCAAAAAGAGTTCGTGTTGTTAGCTTCTTTTTCTA  
AATCCCTCTATCTCTGGCAGTAGCTTGAGGGAGAGATTC TGGTTGTTGTAGAGCTGGAGGTTGAGGAGC  
GGCTTCTGGATAGGAAGAAAGGCC TTTGTGTCAGTTGTAGTGTAAAGGCTCTTGTACAACGGCAGGAGGA  
GCATACTCAAGATAGGGGGATGAAACCCATAAAGGTTATGTAGCGTAAAGGTTCTAATACAGCCTAAGGCT  
GTTGAGGCGCTGGAGGGAAAGAAGGAGTGAATGTCTCGAAGTGATGAGAAACAGCTCCGGGAGTGAATTC  
TGGTGC GGTTGGATGAGTGTGGAACCGATATGCAGTTCCTTCTACAGCAGCAGCTAACTGATGCTGAGGA  
AGATCCTCAGGAGCAATGTAGTAAGCTCCCTGCATAGAAAGGATCTTCGGGACCATCAGTTGGTTGAGATT  
CTGGAGGAGGAGT TCGTTCTCTCCGTAGGGAGGAAAATTATTGTGATTTCTGTTAACGCTCATACTAAA  
AAAGAAGCTTTTTTTTCGACGTCTAAACGTTTTAGACTAAATGTGCTTTTGTTTTTAAATAATAAAAAAA  
TACGTTCTTTTATTGTTTATAACGACCTAGATAAAAA GAATGGATCTTTTTAAAGACCTTTATGCTTC  
TATTATACAGACGTTAATTGGAAGCTTTGCGCTCTATTGTGAGAGAAAGAGGCAGAGGGATGGTCTGCCT  
CCGAGAGAACCTTAGAAGAAAAGTTTATAAGA GGATCCGTTATTTACTGAAAGATCATATCC TCTGATCCA  
CTGTTGTTCCACAAGAGCATGTAAGAGAGAAGAAAACATTTCTTTAGCTATATCTTGACAGATCAAGTTTT  
CTTCTTCTT GAGTGTAGATGAGGAAAGCCACGTGCAACGATTGATAGCAAAATACTTGCAAAGGGCGAG  
AATTTCTTTCGTATCTAAGAGCGCGGAGCGTGTCTCAAATCGCGAGCATCTGCTGAAA GGATACGTTCT  
TTGTTCTGGAGGATGTGGTTCCAGAGATATCC TAGTAGAGATGTAACCTATAGCTGTAGAGAATTTAGACG  
CAGCCTCTTTAGCGGAAATCCCTCGAGATATTTTGCCTTAGAAAAGCCTTTTACAAGATAAGGACGAGACAG  
CTCAGGCTTGTCAATTAGCTT GAGTAGTCGTTCTTTTGCCTTCAATGGCTATCGATCGCGCCTCTTCAGAA  
AGTCGATGAGGTTGCTCAGTCATAAAAAATTTCCATTTCTGTAGGGGGAGAGCTTTTTAAAGCGCTCATCA  
TAAGTAGATGGAGGAGTAGGTTCTTTAGAGGCTTCTACTTTCCGTTTAGAAACTCGCAGTTTGTCTAATT  
CCTGTTGAATTAATGTTTTATGATACGGGAATAGAGAAGAGAGT TTTGCTTCTAAATCTGGAGTAGGCTC  
TTCAAGAATACATTGGATCCCTGTGAGATAAAGAATGGGCTGAAAGAGTTCGGGATTC TGCAGCAAGAGAC  
TCATGTTTTCTTTGAAACCTAATAGGAGTTTCAATGAGGGGAATCTTTTAGCAAATCACC GGATTTTA  
CGAATAGATCCGGGCAATGGTAAAAGCTAAATAGCTTGCACAGACTCTTGACAGCTCTGTGCAATAAAGA  
TGGATTC AATCGATAAGCTATAAAGGTTATCAAGAGCACCTTTACCAAAGGTTTGTCTTCGATTAAGAAA  
TCTTTGTAAGTGCTAGCGGATAGTACTTGTAAACCATCTACGCCGTTTTTTCGCAAGATAAGCGTTTAGCG  
CGATGTTATTAAGCACCTTTGTTTAGCATTC TTTTGCCCAATTC TTTTGAACAATACGGAAGGTAGTTC  
TTTTGGAA GAATACACTGATTCGCCGTTTTTATCACTGAAAC GAATATTTTCAAGATTTCTTCCATAATA  
GCATCACAATAGTCCGATACTTGGGGAATGATCTCTATCTACTAAAGTTTTCTAGCCACGTAGATAT  
TTTTGTA GAGTGATAATGGGGGAGCGTTGTTCTTGAAAGCGACCTTAGCCGCGTTTTGCGTTTTAACAA  
AACGATCAAAAATAGTTCGTGTAGTTGATAGGTCGTTAAACATTTGTAGGCAATTAGCCCTCACAAAGC

GAGCAAACACGTAATAGGTGCTGCGA**GAAT**ATTGCATACCACACAAA**GAAT**GCGTTTACACACAAAGACA  
CCACTTTGTCTGAAAAACAGAG**GAAT**CGTTTTTCTCCTAAAGTTTTAACAGATACAAGAG**ACCCAAATCC**  
TC**GAAT**GATT**GGAT**AGAGAAGAACGTTCCCTAAGCGCTCCAAT**GGGT**CAGGGCCGAGCTCCGGCGCCAAG  
TATTTATCAAATGTTACGATCAT**GAGT**GTTTCTCTATTGCGGTTTGTAAAAAGGGAAAAGAGGTAGGTA  
A**GAGT**GTTGTTGTTAAGCATTTTTTTAATTTTTTTAT**GAAT**TTTTTTAGAGGCGGG**GAAT**GTA**ACTC**TTTTAA  
GTTACAAACACAAAATAAGTTTTTTTTTAGATGTTTTTAATTTAAAA**ATCC**TTAACAAAATTTGTTTTTT  
**GGGT**CCAAAATTGACCA**GAAT**TTTTAGTCAGAGGGCCTTGAAATGTTTGTGTCGTTTCGATA**ATCC**CGTT  
GCAGAGC**GGAT**GTCCCGATTTTTTTGAAAGGACAGGAACTTCTTCTCCATTGTGTGGCAAGAG**GGAT**  
CAATGTTTTATATCGTGTGAAACAA**ATCC**CTAACT**ATCC**TTTCATGCTATTTCTCACATAAAGAGATTTTCG  
TGTTGTCGTCGATTGCAAACATTGTGATCTGT**ATTC**TCACAGGGCCTCTGATGTTATTGGCCACTGTGT  
TAG**GGAT**TATTAGCGTATAGGTTTTCTTCTACTTACCAGACTTCTTTACAAGAACGCTTTCGTTATAAATA  
TGAACAAAAGCAAGCTTTAGAT**GAAT**ACCGTGATAGGGAAGAAAAAGTCATTACGCTTCAGAAGTTTTGT  
AGA**GGAT**TTCTAGTTAGAAATCATTTGCTCAACCAAGAACTTTAACACCGTGTAAAGCAATGGGGGCAAA  
AACTATTAGAAGGAGAAAA**ATTC**CCAAG**GGGT**CCAGAAGGACGGTCTCTTGATATATTTTCAAAACAGTT  
TCCTTCTTTAGTAGAAAACTTTCT**ATTC**GAAGAAAACTTCTGTTT**CACGAAT**TTCTGTAG**ATTC**AATG  
TGTCCTATAAAGAAA**ATCC**ACAAGCTTTCGATGAGGCGATCAAAGA**ACTC**TTATTTCTATTTAAAGAAG  
TGCATTT**CAGGGAT**TTTGTTGTAGAAACA**GAGT**CTCCAACAGACGATTTCCCTTAGCCGTGAAAGTACA  
CAACTATT**GGGT**ATGCCACGATACGATAATTTACCTTTATTT**ATTC**AAGAAGGAAAAGATGGCTCTCCA  
GAAGGGCGTATAGGACTGGTCGATCTAGAACTTTTTCTTGGTCTCCAC**ATCC**ATGCCCGTAGAAGAAC  
TAGCTGTGATGTTTCCATGCATAAAGAGCTTCTCATGACAGAGGCGAAAAAACTACAA**ATCC**CTTCTC  
TACAAAGGAGGTGAGCGTTCTGTAGAGAAAGGGCTTGCTTTTTTTGAACATATGCTAGGGCATCAAGAT  
TTTTGTTCCAAAAAAGCGTAACGCCATTGCGTAATTTGTGCCCTTATCTTCATCTAGAAGTATGGAG**AT**  
**TC**TCACTGAAAATTTTTGATATTTTAAAGCTGCT**ATTC**AACTAAATGGAGC**ACTC**AATGTTCTGTTATC  
TCCAGAT**ATTC**GAGAGCGGTT**GAGT**GCTATTT**CGATA**AAGCAATGGTTGGCTATTAGCTCCAGGTTACG  
TCATCGTT**ACTC**GAGCAAGTTTCTACAACATCTATCAGTCTCATACTGAAGAGGCTAAAC**GAGTAAATT**  
**CTTC**AGGGACTTTTATCATGTGTCGATCTCCTATCTTCCGAAAAGCATCTTCATTAATAAATCTCC**AGA**  
**AT**TATTAACAAGAAATTTGCAGTTGCTTCCAGAGGAGAAAGAAATCAGCGAGGCGCTTGCTTCTCTATGT  
TTACGTGCAGTAATGGAAGAGCTAGTAGCAACAGGAAATATTT**ATTC**TTATG**ATTC**TAT**GGAT**GATTTTT  
TTGAAGGGCAGTATTGTCGC**ATTC**GTTATTAGATCATCACTTGAGAGGTTTTCTTATTTTCGATACGATA  
TACTTTTTT**GAGT**TATGACGAT**ATCC**TCCACAACAACACCTTCTAAAAGTAGTCTTGTTTTTCAGTTTTAG  
AGAAACAAACAAAGAGCCTGTGAAGACGTATC**GGGT**TACATCTATAGCGTTGGTAGCTATTGGCTTTTTG  
CTGCTAATGATTAGCTCCTTGCTCCTATTGCTTAG**GGGT**TCCTATGACTATGCCCTGTTTTGGTTATAAGTA  
GTAGTTGTATGAGCTGTG**GAGT**AGTTCTTGTT**GGATCC**AAAATAGAGG**GAAT**CTGTTTTGGCTAATCGAA  
CTTTCTC**ATTC**CAAAG**ATTC**TGGGCTGCTA**ATCC**TATATTATCAGGTCGAAATGGTTTTTTCTTCTGAA  
A**ACTC**TTGCTTTATGGTAG**ATTC**TCCGAACGTTTTCTATGCAGCATGTGTAATACTTCTTAATTAGAGGT  
AAGAGTAAATGTGGACGGACATACTTTCAGTCTGCGAGATTACTATATCTACAACCACAATGACATTTGCG  
GTCGAAAGTATG**ATTC**CT**ATCC**ACTAAGTTTTATTGAA**ATCC**AGTTGATAAAGAAGTTTTCTTAAGCAA  
TGAA**ATTC**TATACTTACACTGC**ATTC**ATGCTTTG**GAAT**CTTCG**GGAT**AGAGCAAGAGGAG**GAGT**CGAAGAG  
AGCGAAGGCTTATGATAATTACCTCTGAAGCTTGATGTCTT**GGAT**ACAGCTGGGAAGCCTCACTGGA  
AA**ATCC**CTGAAG**GGATTC**TTGCAATTTGCATTTGCTTATTACCGTTCTT**GGGT**AGAGCATT**GGGT**GAAAA  
GTCTCTAAGAAGA**GGAT**CTCTC**ATTC**AGCTCCCTGCACGAAGC**ATTC**AGGTGTGTTGATTACAACGCAA  
ACA**GGAT**ACTTTGCTCGGCAGAA**AT**AGACGAGGA**GGGT**TCCAAGTCTTCTATAGTATTTAC**GGAT**TAGAAG  
GGAAAGTGCAACCACACCAAGCTCCTGGAGATATGCTATGCGACATTACTGAAGACTAGTGTTAACGGTC  
AAAGATGT**GGAT**GAAAGCGACTACCAACAGAAAC**GAAT**TTATGTGGTTTTAGATTTAGCGACGGAAGAAG  
AGCGTAGGTTGCGAGCAGATAAGAACGTG**ATCC**TT**ATTC**CTGGAGGGGAG**GAATTC**TAAGAAAAGAAAATA  
AGGTAGCATATATTTATGAAATGTTGTAATACTATAGCATTACAAAAAGGTGCGATATGAAAAATCAAGA  
G**GAGT**CTGGCTGGCAAGCTTTTCTGACATTATGCTCTAAAATGCAAAAAGAAAAGTTTTTACAAGACCTT  
TTTTCGCTGTTTTTTGCTTTTTGGCGAACGTAAAGATGTCGCTTCTCGCTATCATATC**ATTC**GAGCTCTTT  
TAGAAGGGGAGCTC**ACTC**AAAGAGAGATAGCAGAGAAATACG**GAGT**CAGTATCGCACAAATTACCAG**GG**  
**AT**CTAATGCCCTTAAAG**GGAT**CAGAT**CC**TCAATTTAAAG**GAGT**TTTTACAAAAGAGATCTGATCTTCTTTT  
GTAAAATACAAATAAGATTGAAAGTATTTGTATGCACGCGTTGTTAATGAACAAA**ATTC**TGTTTTAGCA  
GTTTTGGTACGTAAGTATAGCTGCAGCATGCCATGCAAATCAGCTTTTCAAGCTGATTGCTTCCAAGATA  
**TTC**AAAA**ATTCATCC**CTTTACAGCGTGCTGGCTTTCTTTTGAAGCTGGCGCTTATCTACTTGGCGATA

GCCTAATTAAGAAGCCTTTTATTTGATTAAGAGATGTTCTTATAGAAGTAAGAGCGTCTTTTTTGGCGA  
GGATTATTCGTGCGCCAGTTTTTTCTATGATTTTAACACTATAATTTTATGGAGAAAAGATGTTCAAACA  
TAAACATCCTTTTGGGGGAGCGTTCCTTCCCGAAGAACTATTAGCCCCTATACA GAATCTAAAAGCG GAA  
TGGGAGATTC TCAAAA ACTCAGCAAAGTTTTTTATCTGAAGTAGATTGTATTTTGAAAACATATGCGGGGA  
GACAAA CTCTCTGACTGAAGTTAA GAATTTTGCTCGAGCTATTGATGGCCCTA GAGTATTTCTTAAACG  
CGAAGATCTTTTGCATACAGGAGCACATAAACT GAAT AATGCTCTTGGTGAGTGTGTTGCTTGCTAAATAT  
CTTGGGAAAACACGTGTTGTAGCTGAAACAGGTGCGGGACAACATG GAGTAGCAACAGCAACAGCGTGTG  
CTTATCTA GGAT TAGATTGTGTAGTATACATGGGAGCAAAGATGTGGAACGACAGAAACCAAATGTAGA  
GAAAATGCGCTTTTGTAGGTGCTGAAGTCGTTTCTGTAACAAAA GGATCTTGTGG ACTCAAAGATGCAGTT  
AATCAAGCTCTACAAGATTGGGCAACAACAC ACTC ATTT ACTC ACTATTGCTTAGGATCGGCCTTAGGAC  
CTTTACCTT ATCCCGATATCGTTCGATTTTTTTCAGTCTGTTATAAGCGCTGAAGTGAAGAGCAAATCCA  
TGCAGTTGCAGGAAGAG ATCC TGAT ATTC TGATTGCATGTATCGGAGGTGGCTCCAACGCTATT GGATTT  
TTCCATCATTTT ATCC CGAATCC AAAAGTCCAATTAATTGGAGT GGAAGGGGGAGGACTGGGCATTTCTT  
CAGGAAAACATGCAGCACGTTTTGCAACAGGGCGACCTG GAGTATTC CACGGATTTT ATTC GTATCTTCT  
TCAAGATGACGATGGACAAGTATTACAA ACTCACTC CATTTCCGCT GGAT TAGATT ATCC TTCAGTTGGG  
CCAGATCATGCCGAAATGCAT GAGT CAGGACGAGCCTTTTATACATTAGCCACCGATGAAGAGGCGTTAC  
GAGCTTTTTTCTGCTTACTAGAAAAGAGGGGAT TATTCCTGCATTG GAGTCTTCACATGCTCTCGCACA  
TTTAGTTTTCGATTGCTCCTTCTCTACCAAAGGAACAAATCGTCATCGTTAACTTATCTGGAAGAGGTGAT  
AAGGATCTTCCACAAATC ATCC GCAGAAACAGAG GAATTTAT GAGTAAATTA ACCAAGTTTTTAAACAA  
ACTAAGCCATGTATTGGCTATCTAACCGCTGGTGATGGCGGTACTAGTTATACTATTGAGGCGGCAAAAG  
CTCTG ATTC AAGGAGGTGTTGAT ATTC TGAAACTA GGATTTCTTTTTCTG ATCC TGTTCAGATA ATCC  
AGAAA TCAAGTATCTCATGATCGGGCTTTAGCAGAAAATCTGACGTCAGAAAAC TTTGTTAGAGATCGTA  
GAAGGT ATCC GAGCTTTTAAATCAAGAAGTCCCATTTGATCTTATATAGCTACTACA ATCCGCTTCTACAAA  
GGGACTTAGATTATCTACGCAGACTAAAAGACGCGG GAATAAATGGTGTGTGCGTTATAGATCTTCCAGC  
ACCTTTATCACACGGAGAAAATCTCCATTTTTTGAAGATCTTTTAGCTGTA GGATT GGATCC TATTTTTG  
CTTATTTCTGCAGGGACAACGCCGGAAC GGATGTCTTTAATACAA GAATACGCAAGAGGCTTTCTGTATT  
AT ATCC CATATGAAGCTACGAGAG ATTC TGAAGTAGGTATCAAAGAA GAATTTGAAAAGTCAGAGAACA  
TTTTGATCTTCCAATTGTAGATAGAAGAGATATTTGTGATAAAAAAGAAGCTGCACATGTGCT GAAT TAT  
TCAGATGGTTTTCAATTGTGAAAACAGCGTTTTGTTTCATCAAACAACAAT GGATTC TTCGGTAGAG ACTC TGA  
CTGCAC TTGCACAAACAGTT ATTC CT GGATAAATTTAT GAATAT GAATATGAAGCCCAGGCATCGATATCT  
GGCTTCATAGTTGTCTGTATAGATTAGAAGATAACA ACTC TCCTA ATTC AACATAATAAATAT TATCAG  
ACCTTTTGTTTTTTATAAAAAGCCCTTACGAGGCTTCTCTTTTTCGAACAAAAC TTTGTCTAAAAG AATAT  
GCGACAGTACCGTC ACTC TTGATAGTCTTGCATG GAATCAT ATCC TTTGATGAGCTTTATTTGA ACCC AT  
AG ATTC ATGAGACCGTCAAAAAGATCTTCAACAAGATTTTCGTGTGCATCGTGCTCGAA ACTC ATCTTCGG  
ACATTGAACAATTTCTGGTTTTCTTAAACAAAATAACG ATTC TTGATAAATAATCTCGTTGATCAAAGC  
TTCTAATAATACAGATTTTTTCGAAAATTGGAGAACGCATAAGCACTATATCTCCAACAGTGACTTGATT G  
GATAACGTCATTGCTTGCTCGGCTTCGAGCTGTTTTTGCAACAAAGCTTTGCATACT GGATTTGCTAGTT  
TTTTGTAATAAAGGTCGCCAA ATTC CATGTTATAATCAGATATATAATT ATTC TCGTCTATA GAAT AACC  
TTCCACATTTTAAAGTTGTCGTTT GAATATAAAAAGAACC GTTGTCTGAAAAC TTTTTGAGT AAGAAA  
GGATTTTTATTTAACTGAAGTAGTCTTTTTGCCAAGAAAACATGCTGGTTTTTACAACAGTGTGTTGTA  
TAATTC ATTTTTCTCAACCAA ATTC GGTAGAGGTTTTAAAGTAAAATAGTCT ACCC CCCCCCTATTGCTA  
GATTGACAACACATGCTCCCTC ACCC ATTACTACGGTTTTTTTTCTACAACAGTTTATTGTAATAAAGATC  
TTCTAATAGATTTTTTGTTTTTT GAATAACTGAGGGAAAT ATCC TAAACAAAATAGCCGGAGCATGTCT  
AAGATGGCTTGATCAAATTGTTTT GGATTTCTCTGATAAGAGATATGCCCAGACTGAGCAGAAGTTACTT  
TTATTTGAGAGGCC ATCC CCCTATTACAGCAAATCTCAGAAG ATTC CCAGCGCGTTCTAGTCTATCAGGT  
AGCGCACCTGATTGTGATTTATCGAAAAAATAAGCATTTAC ACCC CCTTATGAAAAAATGCCCAGCA  
TCC TATAGAGAGGTT GAATAAATGTTAAGTTTTTCTTTTTTTTTTATTGGTAACAGAAAAACAGTTTTGG  
CTTTTTGCTATGGTTTTTTGTACA ATCC CCTGGCCAGGTAATTGACGTTATTGAAAGTACTACAACATTA  
TTTTGATTGTTTTGCTGAA ACTC TATGCATCACAGGAAGTTTTTAGCAGTTTCCATTGCTTTTCGTAAGTTTA  
GCTTTTGGGCTAACATCTTGTTATCATCAAAAAGAAGAACAAAAGATGTTTTGCG GGATTTGCGATCTGTC  
ATGATCC AATGTCTTTAG ATCC GCGTCAGGTTTTTTTTAAGCAAAGATGTTTCTATTGTA AAAAGCTCTCTA  
TGAA GGGT TAGTCCGGGAAAAAGAAGCTGCGTTCCAGCTAGCTTTGGCAGAAAAGATATCATCAATCTGAT  
GATGGTTGTGTTTTATACTTTTTTTCTAAAAAATAC ATTC TGGAGCAACGGAGATGTTGTAACAGCATATG

ATTTTGAAGAGTCTATTAACAAATTTATTTCCGAGAAATTGATAACCCTTTCGTTACGCTCTCTTGCATT  
AATTAATAAATTCATCATGCTGTTTTAACAGGAGCTCTCCCTGTTGAAGATTTAGGTGTTAGAGCTTTGAAT  
GCGAAAACCTCTAGAAATTGTTTTAGAAAACCCGTTTCCTTATTTTCTAGAGATATGGCGCACCCGGTTT  
TTTATCCGGTGCACACCTCTTTACGAGAATATTACAAAGATAAGCGTAACAAACGCGTTTTCCCGATGAT  
TTCTAATGGTCCTTTTGGCAATTCATGTTATGAGCCGCAAAGATATTTACTAATCAACAAAAACCCCTCTG  
TATCATGCCAAGCACGATGTTCTGTAAATTCGGTATGTTTGCAGATAGTTCTCGATATCCATACAGCTA  
TGCAGTTATTCAAAAAATCATATCGATTTAGTTGGGTACCCGAGCTCCTCCTTTTCTTTAGAAGA  
ACAAAGAAATCTCCCTAGAGAAAAATTTTGTATTATCCTGTATTGAGTTGCTCTGTTTTATTCGTAAAC  
ATTCATCAAACACCTTTAAATAATCCCTTCGCTGAGAACAGCCCTCTCTTTAGCAATCAATCGAGAACTT  
TATTAAACTAGCAGGTAAAGGCTGTAGCGCTACGAGCTTTGTTACCCACAATTATCTCAGATACCTGC  
TACTACTTTGTCTCAAGATGAGCGGATGCTTTAGCAAAGGCTACTTGACCGAAGCTTTAAAGACTTTA  
TCTCAAGAAGATTTAGAAAAAATTACATTAATTTATCCATAAGAATCTGTTTGGCTTACGAGCCGTTGTT  
AAGAAATTCGCCAACAAATTTTGTATGACTGGGATTTAAATTTCTACATTAAGGATAGAATATCATTG  
TTTTTTAGACAAACGTTCCAGAGGAGAATTCCTTAGCAACTGGTAATTGGATGTCAGACTATCATCAA  
GCTAGTGCTTTCTGTCTGTCTTAGTAATGGGACAAGATATAAAGACTTTCAATTGATTAACTGGCAGA  
ACCAAAGTACACAAATATAGTTGCTCAACTTCTGATTCAGAATCAAGCGACCTACAGCTTATGGCAGA  
GCAGTTGTTGCTTAAAGAAAGTCTCTTATTCCTATACCACCTCGATTATGTGTATGCGAAACAGCCT  
CGGGTGTCTGATCTCCAAACCTCTTCTTTGGAGAAATTGATTTAAAAAGAGTTTCATTAGCTGAAGGAT  
AGACGTCCCAAGATAGCAACGAGATGTATTATTTGATTTCTGTTGCTAACACAAGCAGACAAGCAATAGC  
GCAAAAGGCTGCAGCTGAAGCCATAGGCATTGTGATGAAACCTAATAGAAATAGCTTCGTAGAGCAAGAT  
ACTTTACCGCAAATATCGAGAGTATCCAGGTATTTCTGCAAGCACACTTGATAAATAGCAATGCCGA  
AACCAACAAGAGCCAATGGAAGCGTATATATCTTAATTGAAATATCTTCACGATATGCGGCAATACCTAG  
AATTACAACATAAGGAAACAAGCAGATTCCTTTGGTAATAGCAAAGAAGACATGGCTCTACATTCAGAATA  
TAGCTGTAATAAACACTCATAAGCGTTCTTATACAAGAAAACAGCCAAGCAAGATATAAACAATAAGAAC  
GTAAGTGTGTTGATCACCGGACTTCTCTTCTATCGCTTGTAGATGACGCAGTTGAGTAATCACTCTCTCG  
ATCTCATCAAAAGTGAGGATCTTCAATAAGATAATCTCTACGACTGCAGTAGGTGTTGCAAGTTGCCAC  
CCATGATTTGAGATCCATAGATATTGTTCTTTTTAAGCTGCTCCGTAAATCTTTGAGAATTTATGCAGT  
TATTAACCTTTGGGATTAATTTCTCTTCCGGAATGCGTAGGGATCTTTTCTGCTAATTTTGAAGTACT  
TCAGGAGTTGCCAGTGTGATCCCTTTCTGTTTTTTTATATGTGAGAATTCGTGGAAATATTCATATATG  
CTTCTGGATCTGGACGCTTCGGATCGTGATGGTAAACGCACAGTAATGCTTGTGCAGCAGGCATTGAGCC  
ACGAATAAACATACAGGAACATAAGTCAAGAAAGCTTCCACAGTGTCAACAAAATGTTTTTTAATCAA  
GGAAATACTCCGAAGAAAACCTTCACAGGCAGAACAAGATGGTCTTCAAAAACGGTGATATTAATAG  
GTGCATAAGGATCCCTATCGTAGGGAAATACTTTGCTGTGGTTGGAATATGCGTCTTTGGTGGCATAAT  
CGAACGCTTAGTGTGATCATTAAATCCACACACAAAACAAATCCTAGTGCCGTAGAAATAATAAGGATC  
TTCTTTCTCAAGGAGTTCTCGTATCCATCCCTCCGTTAAGGATGAGATAAGACAAAATAAAAAAAC  
GAAACCGTTTTCTTGTGAAATAAAGAAGCTTCTTTATTAAAAAAACTTTTTCTTTCTCTCAGACTT  
CTTATGAGTCAAGAACTCAACTAGTCTTGGTGTATGGAGAAAGGATTTTTTAGAAAATGTTTATCGTCAT  
TTCCGTTACCGTTTTTTAAATTAAGTATACTTCCAGCTCTTCTCGGACTCTGGCTATTTTTTTACTCCTA  
ATATTCCTAACTATTTGGATTCCTCTGTTATTTTATCAGATAAAATTTGCGGCGTCTTTTAAATTTTATT  
ATCAGCTTTATCCTTTTATAATCCGTATTATTTGCAACTAGGCATTTTTATTGGGCTCTGGGTTCCTTC  
TTTTCTTGTCTTCCGACCTACTTCTTTAGTATTTGCTCATGATTCGCTACTAGGTTTTGCTACACTAG  
CTATTATTTTTCTAATCCCTAATCGTCTGAAGATCTAGAAGTTGGTCTACTATTCAGAACTTGCCA  
TTATAATCCCTTCTCCGGAGGAAAAGAGCTGCGGTTCTTATTTTTGCTTTTGTAGGATGGTTACAAAGT  
CGCTACTTAACTTCCGCAGCACTCAATATTGCTGATGCAGACACCTCCTGCTCCTGTTTTTTTTCTCTA  
CACTGATGGTTATTTACTCATGCTTATCGTGTGCTTTGACTGGCGGAGAGCGTCTGGCATACTCA  
ACCCAAAGTAGTTTTCACTACAGCAATTCATTTATTCATAGCTATAGGGCTAACTCTAGCAGCTATTCCTT  
TTATCTCAACTATTTCTGACAAATATGAAGGTGTGTGTCTGACAGTAGCTCCGGTGTTTTCTTTAGCAT  
TTTTTTATGATGAAATTCGAGCAACATGGAATATCTTTCCAAAATTACTCAAAATAGAAAACAGCTAGC  
CATAACAGCCTTTTACGGGTCTGAATACTATAAGGAATCTTTGTTCTGGGAAGAGCGTTCTGTATTACCA  
TTCFCCAAGCGTGTAAAGCAGGCTTTTGGCGGATATCTTTCCCTTTGAATCTTATTTTTGCTGTCATAT  
TCCTATTTTTTTCTGTGCAACTGAATGTAACCTTATCTATTCCTGACACATGCCGCTTCTTTGTAAATAG  
CGCTGCTGGTTTTATTCCTGTGTTATCTATTTTTTTATTCGCAGAAAGCTTGGCTCATCTCCGTTGGTTG  
AGTTTATTGTTTGTGTCAGGGATATTCCTTCTCCAGTCATTTTTTCACCTTCCACTGGAAGCCTCTACTC

TATTGTCTATAATAGTATC**GGGT**ATTGCTTTTATTATTTTATCTATAGGACGCCTATAGTCTAACCTTTG  
GGAGAAGTATTTGCTTCGTTATCTAATTTCTTGTCTGATCTCGTTGTTCCG**ATTC**TGATAGATAGAGCC  
CTTCTC**GAAT**ATGGGAAAAAGCGGTTTCTATAGTTTCATCAAAAAGGTGTTTTCGTAAGCT**GGAT**TTTTTT  
AGTTAACAAAGAAGGTTTTGCTTGTGTCAATACAGCAAATTTAAATCTTTTAGAAA**ACCC**TGAAGGGAGA  
**AT**CTCGCTTT**GAAT**AAAGTTCACGAGACCTTTTACAGAAGGTGCGCCGATTTATAGGTTCTACAAAGAG  
CTAG**GGATTC**GAAATAACAGCTCGCTGCA**ATTC**TCTGTTGCTTTTGGGCTGCAAGCTTTTGTCTTTCCA  
TGCCAAACGAAGCAGTAAAGCAATGGAAGTAACGATAAA**ATTC**CTGGAA**GAATGAAT**GGAAGAAAGATC  
TCTGAAAGAAAGACTACATTGTCAATACAGCACAGTACACCACCTATGCACAAAGCTAAAAAAGCTCCTA  
CCGCTGCAAGCATAGCAAAAAAGACTAGAGGGACGCTCCTGACTTCAT**GAGTGC****GAAT**TT**ACCC**TGTAA  
AGAGAGCTTTTCTCTCTTGAAAGCTTATGTAATTGCTGATCATAAAGAGGACGTGCTGCCTGTACAAGT  
TTTAAAGGAGGTATCGTCAAAC**AGG**TGGTCTT**CA**TTT**GT**CTGCAATA**ACCC**AGCG**ATTC**CTTGTCTTT  
ATTTAAGGCAATT**GAAT****GGAGT**TTCTG**ATTC**TTGATCGCGAAAAAGGCTTCCCA**ACT**CCCAACAATCT  
TGCACATCATGCGAAGCTAGTATGATCGTCTTTCTTCTTTGGCTAATCTTTTACATCTTGGTATA  
AAATTTCTTTTCGTAATG**GGATCC**AAAGACGTGAAAGGCTCATCTAACAGCAAAATAGGCTTTGGAGATAA  
GCTTTGCATAGCAAAACACAACACGTTGACGCTGTCC**TCC**AGATA**ATTC**ATCTGGAAATCGATCTAACAA  
GAAGATAGCCCGAAA**GAAT**GCACAACATTGTAGAAAC**ATTC**TTCTTCAATAGTTGTTTTCTGTTTGC  
**ATCC****TA****ACTC**CGTTAAACAATAAAATATTTTTTCTAACGGTGCGCCA**GGGT**AACAAAGCTTCTTTTGCTG  
CATGTAGGCTATCTGCTCCTGCTGTATAGGTTGCCCTTTCCAGAG**GAAT**TTCTCCTAAAGAACAAGAGAGA  
AGACCTACTATG**ATCC**TAAATAATGTAGTCTTACCAC**TTC**CAGAAGCCCCCAGAACCATAGAAATCTGAC  
CAGAAGCAAAGCCAGCTGATGCATCTTCAAAAAACA**GAGT**GCGATGCATGAGAAT**A**TACAGAGATTTTAC  
GTCTAGCATGGGAAAACACGAACGAAATAAGAAATATTTCTGGACTTGCGGTTACCAAGACTTGA**ACT**TTG  
GGACCTCGACATTATCAGTGTGCGCTCTAACCAACTGAGCTATAACCGCAG**GGAT**GGAGACTAGGAG**AT**  
**TC****GA****ACTC**CTGACCTTCT**GAAT**GCAAATCAGATGCTCTACCAACTAAGCTAAGTCCCTTGAGAGCGGCT  
GTTACC**GA**AG**ATTC**TCAGTAACAAAGCGCTATCTTA**ATCC**AAGAGCGATTTTAAGCACAAAGAAAAGATTA  
TCAAAAAT**GGAT**TTTTTCTGTGCGAAAGAAAAAATCTATAAAGATACACGCTTCTTATGTCCATTTTT  
TTG**GAGT**TTTCGCACCTTAGTGACTTTGAAAGATT**GAAT**AAAGGTGCTGT**ATTC**CTTATCTAAAATTTCTG  
GGAAAGCTCCCTTATACACCATGAAAAC**TTC**GGTACAGCGTGTGATTAACAGAGACAAGC**ATTC**CTCGAAA  
ATACACATCGTCGCATGCG**ATCC**AAA**ATTC**CAAAGCTTTGTGTCTTGTAGAGCTGTTGCTTTAAGATAT  
AGA**ACT**TTGCG**ATTC**AGGAAGTGCCTATAAC**ATTC**CTGCAAAACCTTCTTGAAGGTTCA**ATTC**CGGTCTAC  
TGATATCAATTTTCTCT**GGATATTC**CCAAACAGACACTACATAAACTGTGCTATCACTAGGAG**TTC**CTGC  
TACATAGGTATCGTAAC**GAAT**AGCCAAATCTGATTGAGGGACTTCTATCACTTGC**TCC****GAAT**GTTCGGGA  
**ACTC**AGGAAATT**GGAT**AGCAAAACCGCTTCTCTGTGTGTAATCATAACGCTTCCAAGACAAGAG**ATCC**G  
AAACCTTTTCGATAGCAGAGGTTT**GAG****ATTC**CTCTGTGGTAGAGA**GAAT**AGTCTTGTCTTTAAG**ATCCA**  
GGACTT**ATCC**TCCCTAAAA**ACCC**TGAGGTTCTTCTTCCAGAAAAGCTTCTGAAGGAGCCAAAGTATTA  
ATTA**AAA****GGAT**AGCAGATAAAGAAAGTTTGCAGAACTTTGAAAGCATAATAATTA**AAA**ATATA**AAA**AGCT  
TTT**CGT**ACTTTATGATAACCTCGCATGAGGTTTTTGT**TATA**AGAAAATAGTAAATA**AAA**ATATA**AAA**AGCT  
CATA**ACT**TCTAGATATTTACAAGCTTCTCATAGGCTCTT**CGT**TCTTAT**ATTC**GACACCTTCCGCGT  
TTC**ATTC**GTGAAAAATAATCAAATAGATT**ATCC**ATAAGTTAAGAAAGCTAGTAGCTCTGT**GAAT**AATCT  
TGATTGTTAACGATCTCCTTGT**GA****GGAT**GGCC**GGGT**TCTGTGTACTAG**ATCC**CTAGTTATAT**GAAT**ATGT  
TTGGTAAGGGCCTACTGTATAAGAAGTTTTGCTTCTTAGGTGGGACGTCATTAATGG**GGT**GCGATGTTT  
GCGTTTTTAACCAGCAAAAAGT**CGG****ATTC**TCCCTCTAGATGGGGAAGCTCCCGCTTCCCTGAAAAC  
CTCTAGCAAAA**ATTC**TAGGGAAA**ACCC**TTGTTCAAAG**ATCC**TATGAAAATGCCTTAAGCAGTCAATCTCT  
AGATTGTGTTGTTGTGGCAACAGATGATCAAC**GAAT**TTTTGACCATGTTGTT**GAAT**TTGGGGGCTCTGT  
GTCATGACTAGCACATCTTGCCTAACGGA**ACT**GAGC**GAGT**AGAAGAGGTTGTGTCTCGACATTTTCTC  
AAGCAGAGATTGTTGTGAAC**ATCC**AAGGAGACGAGCCCTGTTATCTCCTACCGTCATAGATGGGCTTGT  
GAGCAGCTAGAGAACA**ATCC**TGCTGCAGATATGGTCACACCTGTTACAGAAACAACAG**ACCC**CGAAGCG  
ATATTGACAGATCACAAAGTGAAGTGTGTTTTCGATAA**GAAT**GGCAAAGCTCTTACTTTAGCAGAAGCG  
CT**ATTC**CTCACA**ACT**TTAAAC**ATCC**AACACCTATTTATCTGCATATTGGTGT**TAT**GCTTTTAGAAAAGC  
TTTTCTAAGT**GAAT**ATGTTAA**ATTC**CTCCTTCTCGTTAAGCTTAGCCGAAGATCTTGAACAAT**TAC****GA**  
**GT**ATTAGAAACAGGTCGTTCTATCTACGTT**CA**GTGTT**GA****GAAT**GCAACGGGCCCTTCTGTTGATT**ATC**  
**CC**GAAGATATAACC**AA**AGTGGAGCAGTATTTAT**TAT**GTCTTTCAAAGCATCTTTT**TG**ACTGGAGGCGTA  
GTTTCTTCTTTAGGTAAGGACTTACCGCAGCTCTTAGCTTCTACTAGAGAGACAAGACTTGAAG  
TTGCCATGCTCAAGTTGG**ACCC**CTATTTAAACGTAG**ATCC**AGGGACCAT**GAATCC**TTATGAGCATGGAGA



AGTATACGTGACCGACGATGGCGTAGAACTGATCTCGATCTTGGCCATTATCATCGCTTTTCTTCTGTA  
CAACTGTCTAAATACTCCATCGCCACTTCTGGACAAATTTATACTAAGGTGCTCACTAAGGAACGTAATG  
GGGAATTTCTTGGCAGTACAGTTCAGGTTATCCCTCACGTAACATAATGAGATTATTAATGTCATTC AATC  
GTGCGCAGATCACCATAAGCCTGATATCCCTTATTGTGGAAATCGGAGGGACAATGGAGATATA GAATCG  
CTACCTTTTCTAGAAGCTGTACGACAATCCCGCTGCGAACATCCTCAGGATTGCCCTTAGCATTCACATGA  
CATATGTCCCTTATCTAAGAGCTGCAAAGAAATTAACCCTACTCAACATTCGACAGAACTT  
GCGCAGCATTGGAATTTCTCCTGATGTAATTTTGTGCCGTTCTGAAGCTCCACTTAGCACGGAAGTAAAA  
AGAAAAATCAGCCTGTTTTGTAATGTGCCAGAACATGCAGTTTTTAACGCGATAGACTTAGAGCGCTCCA  
TTTACGAAATGCCCTTGTTATTGGCTAAAGAAAATATCTCAGACTTCTTGTTAAAATAACTTTGGTTTTTC  
ACCTAACCTTTGGATCTTTAGATTGGCAAGATCTTGTGGAGGCTTTATGTGATAAGGAGCGCCAACAT  
GTTTCGCATAGGGCTTGTGGAAAATACCTAGAACATAAAGACGCATATAAATCTGTATTCGAAGCTCTTT  
TCCATGCGTCTGTGCCAGCAAACCTGCTCTTTGGAACCTGTTCCCTATTGCTCCTGAATCAGAAGATCTTTT  
AGAACAACCTGTCTCAGTGCATGGATGTTTAATTCCTGGAGGTTTTGGCACAAGAAGTTGGGAAGGGAAA  
ATCTCAGCAGCTCGTTATTGCCGAGAACA GAATATCCCTGTTTCGGAATCTGTTTAGGAATGCAGGCTT  
TAGTAGTCGAATATGCAAGAAATGTTTTGGACAAACCTTTGCCAATTCATGGAATGAATCCAGAGAC  
TCCAGATCCAGTTCGCTGCATGATGGAAGGACAAGATTCGTGCTGTTAAAGGGGGCACATAGAGATTAGGA  
GCTTATCCTTGCCGAATGTCTCCGGATCTTTAGCCTCTGCTGCTTATAAGACGGATCTTGTTACAAGAAC  
GTCACCGCCATCGATATGAAGTAAATCCCTTTATATAGAAGCTTTAGAAGAACATGGATAAAAAATAGC  
TGGGGTCTGTCTTTTAGGAGAGCTTTGCGAAATGTTGAAATCCCAATCATAGATGGATGCTTGGCGTA  
CAGTTTCATCCGAATTTTTATCAAAATTAGCTAAGCCTCATCCACTATTTATA GAATTCATTCGCGCTG  
CTAAAGCCTATTCCTTTGGAGAAAGC GAATCATGAACATCGCTAAGCAACAACAAGCTTTTTTTAGGGATCG  
ATTATGGGAAAAAACGTATTGGCCTAGCTTTTGGCAGTTCCCTCTTCTGATCCCTTTGCCTATAGGGAA  
TGTAGAAGCCCCTTCTCTTACTTTGACAGCTCAAGCGCTCGTCTCTATTATCAAAGAGCGTGTCTGTT  
ACGACAGTAGTTTTTCGGGAATCCATTACCTATGCAAAAAGCTTATGCTTCAAGCGTGAATCAGAAATTC  
AAGAAC TAGCCGC ACTCATCCAAGAAATGACTGCTATAGAAGTCATTCCTTTGGATGAGCGGCTATCTTC  
AGCACAAGCAGAACGCATGTTAAAAAGCGATTGTGGCTTAATCGAAAACAGCGGAAAAATTCCTCGGAT  
AGTCTAGCTGCCACTTTAATCCCTTCTAGCTTTTTAGATTCGCAAACTATACTAGGACCCCTCATGGC  
AAAGCCATGTTTTATGAGAGAGAAATCTTTTTAGGCACATATTCGTTTTTTTTGGTATTGTGGGCTCTCTC  
TTAAAAAATTAACACTCTATACTAGTGTGACCTTGAAGAAATTAAGACTTTGGCCCCACATTACCAG  
CCTGCCCTCCCTGTATCGTGGTTATTTTTGGTGCTACAGGAGACTTGACCTCTAGGAAGCTCTTCCCTGC  
TTTTATACAATTTAACAAAGGAAGGACGTCTATCCGAAAACCTTTGTTTGTGTTGGGTTTGCTAGGCGACCT  
AAGTCTCATGAGCAATTTTCGGAAGAAATGAAGCTTGCCGTTTCAGCATTCTCTACTCATCGGAAATAG  
ATATTCGAGTTTGGGAAAGTCTGGAAAATAGAATCTTTTACCACCAAGCTAATTTTTCTGATGCCGAAGG  
CTACTCTGCTCTGAAAGCTTATTTGGAGCAACTAGATCAACAATATGGAACACAAGGGAATCGTCTTTTTT  
TATTTATCAACACCACAGATTATTTCCAGGAAATCATCCGCAATTTAAATCGGCATCAGCTATTCATATC  
ATGAACAAGGAGCACACAGCCTTGGTCTCGGCTAATTATAGAAAAGCCTTTTGGAGTTAATTTAGAAAC  
AGCTCGAGAGCTTCAACAATGCATTGATGCCAATATTGATGAA GAGTCGGTTTATCGAATAGACCATTAT  
TTAGGAAAAGAAACGGTTCAAAACATTCGACTATTCGTTTTGCTAATACTCTCTTTGAGTCTTGCTGGA  
ATTCCTCAGTACATAGATCATGTGCAAATCAGCGTTAGCGAATCAATTTGGTATA GGATCTCGAGGGGAATTT  
CTTCGAAAAGTCGGGCATGCTACGAGACATGGTACAGAATCATTTGACGCAGCTGCTATGTCTACTGACT  
ATGGAACCTCCTTCTGAATTTTTCTCCGAAGAAATAAAAAAGAAAAAATTAATAATTC TAAAGAAAATTC  
TTCTATCCGCGAAGAAGATGCTGTTCTGGCCAATATGGTGAAGGGATTTGTGCAAGATGTTTCAGTTCT  
GGGCTATCGGAGGAAGAAAATGTCGATCCGAATTCCTCAGTAGAAACCTACGTTGCATTAATAATATTT  
ATCGACAATCCCTCGCTGGAAAGGGGTTCCTTTTACTTACAAGCAGGGAAACGCTTTCCTAAAAGAACAA  
CAGATATCGCTGTGATCTTTAAAAATCCAGCTACAATTTATTC AATGCAGAGAATGTCTTTGTGTCC  
GTTAGAAAATGATTTACTTATTATTCGTATTC AACC GGATGAAGGTGTTGCGCTACAATTTAACTGCAAG  
GTTCCAGGAACAAATAAGCTCGTACGTCCTGTA AAAATGGACTTCCGTTACGACAGCTATTTTAACTACTG  
TTACTCCGAAGCTTATGAACGGTTACTGTGCGACTGTATCCCTTGGGGACAGAACGCTATTC ACTAGCAA  
TGAAGAAGTCTTAGCATCTTGGGAAC TATTTTCTCTATTAGAAAATGGTCTCAAGTAC ACCCTATA  
TTCCTA ACTATATGGCCGGATCTTTACGTCTCAAGAAGCTGATGAACTATTATCTAGAGATGGAAAAG  
CTTGGCGGCCCTATTAATTTGTTTTGCAAGAGGTTATATACATGGCT ACCCTTATTAGCCTAAATGATGC  
GAATGAATGCTTATCGCTGACTCTCAAGAAGAGT TTTTACAAATCGCATGTTATGATTGGATCTCTACA  
GCAAAATAAGCGATTCACAAACCGGGTGCATTC TATGTGCTCTTTCTGGAGGAAAA ACTCTTTGCAA

TTTTCCAAGAAATTGTGAAGAAGCGCGGGCTATTTTCAGACTGTTCTAAAATTGTGGTATTTTGGGGAGA  
TGAGCGCGCAAACGAAGATGTGGAAGCTGGAAGTAACATCTAAAGGCTATGGATATCTTAAAAAGGATG  
CGCATTCAGAAAGATCAAATCTTTTCGTATGGATACCGCAGATCCCAAAGGGGATGAGGCTTATGAAGCGT  
TGATTCAGAAGTATGTTCCAGATGCTATTTTTGATATGGTAATGCTTGAGATTGGTGAAGATGGTCACAC  
GCTTCTCTCTTTCCAGAAACACAAGCTCTGGAAGAAAAGAGCGTTTTGTAGTCTTTAATGAAGTCCCC  
CAATTACATACCCGCCGAATGACTTTAACATTTCCGATTGTTTCGACAAGCGCGGCATCTTGTGGCCTACG  
TTCAAGGTGAGAATAACAAGATCTTTTCCATAAACTTGTGCACCTTTAGGTAGGGATACCTTTCCTAT  
AGAACGAGTAGGAATCTCTAAATCCGTGTGCAGTGGGTACTATCTTCTGATAGTTGTAGAAAAACGGAT  
CTAGCAGATATTCGGCCGATTGTAAATTAGAGATGTTCTAACTTCTTCTTCGATTACGAATAGCCATCT  
GTTGTCGATTTTTAAAAGACCATAGTTGCAGGCAAATCCATTCAGACAACCTGGTGCAGAAAGGATAGGA  
ATCCAACGCTTGCACAGCACGAGTGATGATAGACAAGACTTCTTCTAAAAGGATAGACTGGCATGGTCTTG  
ATTTCTGTTTAGGAGATCCGGATATGCAAGTAATGATACTGGCACCTTTTTTGTCTAAAAGAAACCGATCCC  
TGAATAGTTGTAGAAGGACCGTTAGCATAGCCTTGGTTTTGTCTCGCAGCACCTGTTTATCTTCATCAGC  
TGTTCTTTTACTTGAGAGCCTATGCGTGTACAGACTCCTTACCTGTGTCTAAACCAATCAAAAACGCG  
ATATCCTTTTTACTAACTAAAGTCTTTTCCCTCCATAGGAATATGAAATGACACACATCTAGATCGAATAG  
TAGGAGGCAGTCTCTGAGGCAAAGCGGATACTAGTATAAACATACCCTACTGTGGTGGATCCCTAAAAG  
CTTCAAAAAGCTGAGATCGCATCTAGTGTTATTCATCGGCCTCATAAATAATATAAATTTTATATGGG  
CTTTCATAAGGATGAATCCAAATATCCTTTTCTAATGTCACGGGGTGTCTCAATCGTATGAAGACGTCTTT  
TCCCCTGAGGAGAGTACTCGTGTATGTCTGGATGCAGTTTTATTAGCTAATTTGTAAAGCAGCTTCGGGTAA  
GGTTCTTTTGATAATTAGAGAAGCATATTCATAAGCTCGAGCTGATAAATTGGATAAATCCTGCCCATGT  
AAAATGATAGCAGAAGGAAGCTTCTGATCACGCACCTCTGTATAAGAGCCTCCCAAGCAGCACCTCTCCA  
TTACCTCCCCCTGTCTATATCAATGCACGAATCTGTAAGAGAGCTTGGTCAACAGAAGCCTCTGTTGGCA  
AGAGGGCATCTAAAACCTTGTACCTATCTGGAGCTTTTTCTGCTAAAGCAAGAAATCCCTTCTCTGACAGA  
CTGGTGGAAAATTTGTGGTTTTTGTCTCAAATTTATCCAGATGTTTCTGACGAGCCTTTCGTAGTAATCCT  
TCTCTTGCTGGATATCCAATAAGGAATATGATGTCTGGCAAGAACGGCTTATCTCCACAACATGATAAC  
ATAAGTTCGTAACAAAACCTCTCCCCTAAGCCTCCAGCAATTCCTTGATATAACAATAGTAGAATCGTGAAA  
ACGATCGTTATAACCGTCTTCCCAGACTTAAGAGCAGGTATGATCTTTTCCCTGAATGTGTTGTGCACGA  
GCTGCTAAAAACAACAACAATTCGTCATATGGAGATATTTTTTGTCTGGATCCAGAAGAAGCCCTCGAA  
CACTGTCTCCAAGAGAGCATCCCGCTCTCTCGTAGTGACAATTTCTCTGCCTTCTTCTATTAACG  
CTTAGAAAGCGCTTGTATAAACTGAGTTTTCCAGCACCTTCTCCGCTTCTACTACAATAAACACGCTA  
TTCCTCTATTGTATCCGCCCAGATTGAACACTTGTGCAAGATTTTCTTCCGTTTCCACTGATTCGTGA  
TTTATGGATAGTTTTTCCATAGCAACAAGCGTATCTCCTTCTCGAAGATTGACAAGACGAACACCTTGTG  
TGGCTCGTCCATTACCCGCACATCTTGCATGTTAATTCGGATGCTTGTCTTGGAGCAGACATAAGTAG  
GATACTATCACAAATCCGTTACCGAAATAGCTCCTAATACATCTCCATTTCTTGGTTAATCACGATTGAA  
CGAACACCAACACTTCCGCGATTTGTTTCTCGGAAATCACAACTAGCGAACGTTCCCAAATCCATTAT  
CACACAACTAGAACGCTTTGATCTTCAGTTACAACCTGACAGCTGACTACAAAATCTTGTTCATTTTT  
TAGAGAAACACCTCGCACTCTAGCAGCTCGTCCATTGGACGAACCTTATCATGAGGGAAGCGAACT  
GCCATTCAGACGTGTAATAGCATAACTTTCTTTCATCGTTCGCTATATGACGAGCAGCTATAAGCT  
CATCCCATCATCGATCTCGAGAGCTCGTATTCCTTTTTACGAGGGCTGCCAAAGGCATCTAAGGAGAC  
TTTCTTGACAACACCTTCTTGGTAGCTAAAAGAGGTATTCCTTGTCTCGAACCCTTTTACATTAAGC  
ACCGCAGCAACTTGTCTCCGGGACGGATTCCTTCCAGGAAATTAATAATAGGTTCCTTTTGTCTCTAC  
GTTCTCCTCAGGAAGCTGCCATACTTTCAACCAGTAACACTGACCGAAGTTGGTGAAGATCAGTAAGTA  
ATCTTTCGTGGATGCGGAGTAAACAGCTTTCAAAAAGTCGGAACCTTTCTTCATATCGAATCCAGTACT  
CCTTGCCCGCCGCTTTTTGTTTCGCGGAAAACCTTAACTGGCATAACGCTTACATAATCATCCAGAAA  
TTGTGATGATTACAGACTCATCTGAAATAATATCTTCTATGTCCGAACATCTCTGTGTCCATTTCAAT  
TTAGTACGACGAGGCGTCTTATGAACTTTATGTAATTCCTTGCAGTTCTTTCACGAATGATATCTTTAACT  
AACTCTTCTTACAGCTAGAACCTTACGATAATAAGTAATCTTTTCTAACAGCTCGCTATACTCTTTTTGTA  
CTTTATCTGCTTCTAAACCGGTGAGTTGGTACAATCGCAATTCAGGAATAGCTAATGCTTGTGCTTCTGA  
AAAATAAATAGTTCAACCAGCTGTTGTTTTGCGTGTCTTTATTTGAACCTTCTCGAATGGTTTTACT  
ACTTCGTCCATAACAAGAAAGTGTCTTTAAGAAGCCTTCTAGTATATGCGCACGAGCTTCCGCTTTATTTA  
ACTCATAACGAGTTCTTCTTCGGATAACGTCATACGATGACGAATCCAAAGCAGAAATCATTCATGAAT  
ATTCATAGTGCAGGAAAGATTTTTATCTAGAGCCAACATATTAGCTCCAAATGTCACCTGCACATCTGTG  
AATTTATACAGACGATTGATAACAACCTCAGAGGATTCCTTTTTTTCAGCTCCAGCACAAACACGAATCC

CGTCTTTGTCAGACTCATCGCGGACATCCGATATTCCTGTTAAGGTCTTTTCGTTGATTAACTCGCTAT  
CTGCTCAATTAATCGTGATTTATTTACGTTGTAAGGCATCTCTGTGA GAATAATATTTCTCGTTGCTTG  
TCCGAGTTCTCCTCTACGTGCATACGAGCGCGCAAACGTAACCTTCTCTTCTGTATAATAGGTAGAAC  
GAATCCCTTCTGTACCACAAATAATCCCTCCTGTAGGGAAATCTGGGCCAGGCATTACCTCCAAAATATC  
TTCAATAGAGGTTTACTGTTAGCCAAAATAAGCGTAGCCTCAATTAATTCCTCTAAATTATGCGGT  
GGAATATTTGTTGCCATCCCTACCGCGATGCCTGAGGAGCCATTACAAAGTAAATTAGGGAATTTGAAG  
GAAAACTACAGGTTCAATTTAGTTTCATCGTAGTTAGGGACCATATCTACAGTATCTTTATCTAGGTC  
CTCTAACAAAAGATAGCGCTGTGAGTCAGGCGAGCCTCTGTATATCGCATGGCAGCAGCTGGATCCCG  
TCGATGGATCCAAAATTCCTTGACCATCAACAAGA GGGTATCGCATGGCCAAATCCCTGTGCCATCCTTA  
CTAAAGTAGGATAAATGACACTTTCTCCATGGGGTGATAATCTCCGGAAGTATCACCGCAAATTTTTGC  
GCATTTTCTGTGCTTTACTCCTGAGTCAGATTTAATTGTTTCATAGCGTATAAAAATACGTGCTGAGAA  
GGTTTTAATCCGTCCCTAGCATCAGGCAAAGCGGGAAATAATTACCGACATGGAATAACGAAGGTAGC  
TCTCCTTCATTTCTCTTCAAGATTTTTAGGGACGATGATTTCTTCTTTATTTAGCATGGTAGTTCTGT  
TCCTAAATATCTAAATTAATTCATCCGAATGGATAAAGCGTGACTCTTAATGAACTCACGTCTTGGAGGTA  
CCTCTTCTCCCATTAAACATTGTAAAGATATGGTCTGCTTCGACCGCATCCCTTTAAAGAGACTCTAACGAG  
AGTCTTTGCTCAGGATTCATTGTTGTATCCACAAC TGATCTGCATTCATCTCTCCAAGACCTTTATAC  
CGTTGAATCTCAATTCCTTTTCTTCCAAGGCCTTTTAAGTAGTCTATTACCTCTTCAAGGTGTAACAAA  
CATACGGAGATATTTTGGATCTTCTGTAGAACTGTAATACCAGATCCCTTTTGGATGGAGGTAATTCGG  
GATATCGTAACCGTAATCACCTAAATCGCGCTGAAGTTCTTCGAGAACAGAACCTTTATATAACTCTAAA  
ATCCGCGAAGCAGATTCCTCATTGGCAGCAATAGCTGCTTCTCTTTCATGGAATAGAGATAACTGC  
CTCCCTGCTTCCACTTTCTGGAGGATAGTAATACAAAGGATAAGCTCCGTCTCGGAACATATCCAAGAA  
TTTAGAAAATGGAATCGCTTTTTTCTCTAAAGAAACAATAAAAACCTTCGACCTCTAGAAT AAGATTAACG  
AACGTTTCCAAAGCTTCCCTCTCAGATCCCTTAAGGTGTCATCAAAAAC TATCTGGCTTTCTTTTGTTC  
CTAAGTTCAGCAAATAGCCATCCATCTTTTTTCTGAGA GAATGTAACGGAAATCTTTTTTCTTGCTCAC  
TCGATATAAAGGAGTTGCGCAATATAGACGCATTCATTTTCTATCAAAGCGGACATATGTCTATAGAAG  
AATGTTAGCAACAAGGTTGGAATATGAGAACCGTCCACGTGAGCATCTGTCATAATAATAATACGTTTAT  
AACGCAATTTGCTGAGGTTGAAATTAATCCCTTCCAATTCACATCC TAAAGCTGCTATAATGCTTCCAAT  
TTCTGTTTGGAAAAC TTTTGTAAACGAGCTTCTCAACATTCAGGATCTTACCACGAATAGGAAGA  
ATTGCTTGA AACGACGATCTCGTCCCTGCTTAGCTGAACCTCCCGCAGAGTCTCTTCCACAATATACA  
TTTACATTTTTTCAAGGATCTTTTCCAAGCAGTCAATTAACCTTACCTGGTAAGCGAGCGCTATCTAAAGC  
ACTTTTCCGAAAAGTTAGCTCTCTAGCTCTCTTAGCAGCTTCTCTAGCTTGGGTGCAACGAACACCTTG  
TCTACAATCGTTTTAGCAATTTGAGGATTTTCTTCAAAAATGTGGTTAACACCTCACCCTAATTTGCT  
GAGAAACCGATCCGACATCACTATTTCCAAGTTTTGTTTTGTTGCCCTTCAAAC TGAGGATTTGGGCAC  
TTTAAACGGAAACAATTGCTACTAGCCCTCTTTGATGTCTTCTCCAGTCAAAGACAACCTTGTCACTTTTA  
GATAGATTATGAGCTTTAATATAGGAGTTACTGCCC GAGTAAGAGCCGTAGAAAATCCTGTTAAATGAG  
TTCCGCCTTGCTTTG TAGGAATATTATTAGCGTAA GAATAGATTAATTCGGAGTAACCAGAATTC CACTG  
TAAAGCAGCCTCAAATTC TATATCCCATCATCTCCAGGTCTCGATCCCTGAATATAAATAGGATTTGGG  
AAAA GAATTTCTTTATTTTGGTTGAGGTAAC TGACGAATGATTGAATTC CGCCTTCATAGAAGAAAACGA  
CTTTATCAAATCCCGTATCACGGTCATCTTCAAAAACAATCGTGGCTCCACGATTTAAAAATGCTAATTC  
TCGCAAACGCTTCATTA AAATCGCGCGATCAAAAACGCACGTAGAGAATATAGCTGGATCTGGATAAAAG  
AGAACTTCTGTACCTCGTTTTGTCTGTAGGACCAAGCACCTGTAAAGTCGTTAACGGAGCGCCTCTTGAAA  
ACTCATGCTATACGCTTGTCATCTTTAAATACTTTTGCAAT GAATTTTTCGGACAGAGCATTAACGCA  
CGAACTCCTACTCATGCAAGCCTCCAGAAACCTTATAACTGCTTTTATCAAATTTACCTCCCGCATGT  
AGTACGGTAAGAACCACCTCTAAAGCGGAAATTTGCGCTCCTTGCTTGGCAGATTC TTTTTCGTGAATCT  
GAATAGGGATTCCTCGACCGTTATCCGAAATAGAAATACCTCCGTCTTCCAATATGCGAACAACGACCTC  
GGTACAAAACCCGCCATTGCCTCATCGATACTGTTATCCACC ACTTCATAAACCAAGTGATGCAATCCG  
GTA ACTCTGTATACCAATGTACATTC CAGGACGCTCACGAACAGCTTGCAATCC TTCTAAAACGGTGA  
TGGCTGATGCGTGTATTTCTTTTCTTGTGCGTCCATAACTATCC TAATAAAAAGCGTATCTCTTTAACT  
TTGGCACC GGAACTGCTGAATGAATTCGGGATATCAACTCTTTTTGAGAGCTTTGTTTAAATACAGCAT  
ATAACGAAGCATTGCGGACTTTAATCGATAAAAATTC CGTCTTAAAGCCCTATAGCCTGAGTCATCC CATT  
ATACTTCTTTCTAGAATTTTCATACCACGCCTCTATGACCTCTTGTGGCTTGCCCGCAA GAATTTTTCGC  
AAATGAGACAAATGGTCTCGGAGAAAATGTTTTGCATGCTTAATGGGA GAATCTGTTTCGACTTGGTTTTCT  
TACGACGAAAAC TAGGTAGATTTTGA GGATAAAAAGACACAACGCTCCTTCGATATGCGCAAGCACACCT

TCCTTCGCAGAAGGCTCAGGAAGAAGGCTCTTATACTTGTGCGAACTAAAAAGTCAAAGTATTAGCGC  
TAAGTTCTAGTAAATCCTTGGATTCCTTAAAATGGGTAGTTAACTGATTAACAATCATTGGAACTAAATC  
ATTAATCGACTACTTTTAGATGTCTTAGGCAAACTTTACAACAGAAACCATCTAAACGAACCACCTTCA  
CCTCTTTGTCCTAGAATAATTCATCCCAAACGCGAACAAAATTTTGGATCCGTATCGATTCCTTCTT  
CTAACAGCAGTTCTCCATTACGGCCTATTTTACCAGCTTTGACTAGTTCAACTACATGGCTGCCACAGC  
GATGTATTTAGGAACATGACTAAGATCTAAATCTTCTGCGAATGACTGGACGCTCTTGTGGACTTCC  
TCCGACCAGACAAGGGAATCCCTGGCTCACAAGTATAAGAAGCTTCTTCAATAAGAGGAGTCGCCTGCT  
CTTCTTGGATAACAGGTTCTTTAAACAGATCCCTGTTTTGTTAGAATCACGTATTTTCCCTGCTGCTTCG  
GATGTGACAAAATTCCTAAACAGCTAATAGAAGCCGGTGGCTAATACAACCCACCAAGAAACAAAGCT  
CCCAAACAACAGAAAAAGCTCCACCAACAGCTGCAGCACACGCTCCAACAATAGCCAAAAGCTGTCACCA  
GCACAAATAAAGCTAACGAGACCTCTTACTACCTTGAATATACTGGGTATTCGCGGTGGAATGTGCCA  
AGACAATGTATTCGTGAAGCTTCTTGTCCAACCGATTGCACAACTCCTCCTTTCTTGTTTTTTTGAGA  
TCAAACAAGTAGACGGCGAAAAGGTTTATACTAAACCCGATAAAAAACAAAAAAGAACTCATAATCGCG  
CCGTTTTATATACGGTCATTTAAAATTCCTCCTCGAATTTCTCGCATGACTTTTTGCATATGATGCATGT  
TGTGAATGGACGCCAGATACCCGCATTTGGCTCATGTACTTTAAACAAATGTCTTAAAGTAGGCGCGCT  
TATGCCTTGAGAGCATGCAAGACATGAACACCCAGGCTCTATAAGGTTAGGTCAGAAAGGTTACCGTTGA  
TTATTAATTTTTAGAGGGCTTGTGATGTCAAAATCATGCCATGTCGCGCAGCTTTAGTCGGATAGAGC  
TATCAAAAAGAACTATTCGAAACCAACAGTGGCCAAATAGAGGGCAAATCTCCTATCCCTAGCAGATG  
TCTAGGCTTTTCTGCTGAAAGATTTGCAGCGGTAACGCCACCACCTCTACGATATCTTGAAGATTTTTTC  
CCAAACTGCCTCCAATAGCAGAGCCATCGAAAAGCAAATCTTCTACGAATTTACAGCCAAGTTTTCTTT  
GATCAGGGAAAGTCCCCCATGAATGACTCGTACATGGACTGAATTCAGGATTTTTTAAATGATAATC  
CAAGAACGTTTTCTCCAAACGTAAGTGCCTGAGATGACTGGTGAAAATATGTGGGATCTGCATGAAAG  
GGCAGCAGCTCATCTAAAGGAAAGAAATGATATCAGCGCCAAATCTTCTGCGCTTGTACAGAAAATTTCTG  
GAGAAAGAAATAGCTTACGGCCATCTCGGTAGGATTTAAAGTGTACCCCGTATCATTAACCTTTAATGAT  
GGTGTTCCTCCTTTTTTCTTCCCGCAACTTTTAACTCTTTCAGCTACAGAACCATATGCCAAGCTAAAA  
ATTTGAAATCCCCCGAATCTGTAATAATAGGCGCATTTGCGACCAATAAATTTGGTGTAAATCCACCCATAG  
CAGCAATAGCTTCTGCTCCCAGGATGCACTATCAGATGATAGGTATTGCAAAACATTAGCGGGATATTGCT  
ATGATCTAAACTCCTTTTAGAGCTCCATTTGTAGCCACAGGAACAAAAGCCGGTGTATCAATATACCCA  
TGCGCCGTCTCTATCCGACCTACTCTAGCCCTAGATTTTTTTGATTGATGCAGAATCTCAAACGTAAG  
CCACAAATCCACTCCTTTATCTAAGCGAATTCATAAAAAATAATAAAATTCATAAATCATTCTAAAGAGA  
GGGGGAGAAAAGACATAGTGAAAAAGCCCGAAGAAAACCTTTGTCTTCGGACTCACCCACTATTTGAAA  
AATAAAACATTTAGAGTGCCGGTGATCAATAGGAAGATGACCATCGACAGATATCGTTAAGAGCTGTAA  
CAATCGGACCAGAAGCTAAAGCCGGATCAACGCCGATTTTTGCAAAGAAGAAAGGAGAAAGAACTCCTAG  
AGTAGTAGCAGTTAACGAAGCACCAGATATCCACACAGAAACGGTAACCCCTAACTGGACTCCTCCCGTA  
GCAACAACCCAAAGTCCCAAGCATCCATACAACAGACAACCTAGACCACAAAAGAACTCCTAAAGCAACCC  
CTGTTAACAATCCAAATGCTCATTCTTTAAGAATGGTCTCTCTTCTTCTACCAAAGAAAGCGTTCCTGT  
TGCCATACTACGAACAAAGAACTCGTGTGCTGACTGCCTCCACGTTTCCCGAAAGACCATTCTAAAGGA  
ATGAAGAAAATGACCATGGCTAAAAAGGTTAGGGCAATTTTTTGAATAATGCCATTACCGAAGCGCTGA  
CAAGTCCCGCACATAAGGTAATAAGTAACCAAGGTGCCCGCAATAAGAACTCGTTGCACAACATGGCAGTC  
GTGATATCCAACATCTTCTGTGCTCCCGCCATTCAGCAATTGTTTCGTCTGCGATATCTTCTATTGTT  
TCAACCACATCTTCATATGTGATAGCCCCTATCAAAAAGTTTTCTTCTGCTCCACTACAGGTAACACAGCGA  
CTTTATACCGCTCCACAAGGTCCACAACCTTCTCTCTAGTTGTATCAGCTAATAACCTTATGTTCTATAGG  
ACGCATGATTTGCTTTAAGGGCATTTCTGGCGAAGCAATAATTAACCTTCTATCTGTTACAAAACCCGTC  
AACTCCCTTTAAAGTCTAAGACAAAAACTAGTCCGGTCAAATCAATGCCAGGATATTGCGTATGCAGG  
TGGCAACTTCTTTAACGGTTGTTTCCATTAATAAAGGCAAAAACTCATTGGTCATGAGTCGCCCAGCTGT  
ATTCCTTCCATGCTTTTGTAAATCACGAATCTTTAAGGCTTCTTAAACGTCGATTAATCTAAAATTCCTT  
CGATATCTTCGGTCAGGAATATCATCAAGAACCCAAATCGCTTCGCTGAGGCAATTTGTTCTATAAGAG  
CGCAAAATTTCTCCATCCGATAGATTGCGGAAAATAGCCCATCGCGAAGCGGAATCCGTATTAATAATAAA  
AGCAATCTTGAAGCTATACTATCGAGATTCCTATAAAAGAAAGAGCGTGAATCCGAAGGTAGACATGAT  
ACCGCATACGCTAAGTCAATAAGGATATATACACTGACTATTGATGTTAAATCTTGCAGAAATGTTCCCTG  
CTGTTAGGGTATCAAAAAGCTTCTTCTAGTTTTAAAACATAGTTTCATCATCTAGATGACTAGTTTTTGAATC  
CATAAGATTTCCGGAAGTTAGCGCAACATCCAACTTTTCTTCGTTTCTATTTTTGCTTTTCACGCCCTTC  
TCCGTTCTTTATATAAAGACTCTTAAAAGTGCCTATTAGCGACACATTCGGTCTAAAGTCTCGCCAAAT

CTAATACCTCAGACTATCTATTAAGAGATTTTTTTTACGAAAACGACAAAAAGTCTTCCGAGACTCTTAAA  
CAAGAGTCCTTACTATAAAAAAGATACTTTACAAACAGATACACTTAGGCAGCGACCCATAAATTATTTTG  
TCACTGTAAGCTTCGTTTCTTCTGACAAATGAAAAAAGGAATTAGTCGTCAGACACCCATGCCTCGGAT  
CCTCCGCCTAATCCFCGACTACATGATGAAGATTTACTGTAGATCTGCAAGCAAAATCGCTTTACCTGC  
TAAAAACTTTAGCAGTTTAAACTAAAAGCTGGCCAACCTTCCCTGGAACAGCCCCATATAAAAAATGATGC  
CAGATACTCTTTACTTTTCGGGAAAAGATTGTATTGATGGCCGTGCTCCAGAGATGATTACCCCATCTTTC  
AGAAGAAACAGTTGTGCCGGCTGGAAACAACCAAGCAAATACCAAGCATTTTGCCCTAACCCGGAGCGCG  
TCCCCCTCCCTCGAACATATAATTTTTTTTACAAAAATCCCCAAACTCTCGCGAACGAATCACGTC  
ATTATTC CAATCTCGTTCCAACTGGCTAAAACC ACTCTACCTGACAAAGGATTTAGCAACCCATATAAG  
TTCGCTAAATAACAGGCTGCTCCGTAAAAGGGCCTTAACAGCCTGCAACAAAGAGCGAGTCATTTCTC  
GAACGATATCAGAACAACAACCTTTCCTCTTTAGGGATGTCTGTCTGATAGTTTTGACGCACCATCTG  
GAATAGGATATAGAAGGGAACAATGAAAAAGCGGAAAATATTGTACAGCATCCGC ACTATGGAAGATA  
GGTAATAGAATACTGGTAACGACGCAATAACGGTCCGAGCGTCCATGGGAGGATATGTATAAACGGGTG  
CAATCCCTGACCCGTCTTCTATCTAAAAGCGAAACATCCATATAACATATCGGGCTCTTGGATCGGCCGGAT  
AAATTCCTCTTTTTCACACA GGATAACCCGCTCCATTGCCGAGAGATAAAAAGTTGTATCTTCTTC  
CCGTATAAACATCCACTTTACCAGCGATTTCAAAAA GAATAGCTAGCCCCCTCCAAATAAAAAATAAGG  
GAA GAATCGCTATAGCAAACATTTTAGGAAAGGTCAGCACTCTTGAATTAGCTAGATAGGCTATCCGACA  
ACAAATCCACCC TAAAAACAACAAGA ACCCTACAACAAAAC TAATAACACGAGCCGAAGATGGTCGATAA  
GAAGAAGCGTTTAAACTAC ACCCGTTATACGTTTCTGAGTAGCTCTCAAGCTGAGCTATTAGGGAAAG  
ATTTGCGGGTCACGGGACGCAATCTAACCTCCGAGGAGGGAGATTTAGAGACATAGAAACCATTTTAAT  
TC TAACCTTCTAAAAATTTTACTTTTACAAAGTTGAAGCCATTC TTTTGTCTCAAGTATTAGACTAGATT  
TTACTAATTAAAAAAACC GTTTTATTTCTAAGTCGACTAATCAAGAAATATCAACCGCTGGTTAATAA  
AACCCAACTAGTTATAATGCTATTTTCAATTTCTTTTGCAAAA ACTCTCTACTTTAAATTAATTTGGACTTT  
AAAACCTTTATGGCAACAACAGTTAATCCTAATTACTCTCTTCTTTTGTGAGAAAATGGTTTCTCAG  
CTACGTTAGCTGCTCATTC TTTTTTAATCATCTCAAAC TTTTGATTCGCTTCTTGTAGGATATTTTTG  
CATATTATTAGGAGCTCTAATCTTAACAGGTGTGATTACGACTATACCCCTCTATTGCAGCAAGCTACTTT  
CTTCTCTGGGAGT TACTTTGGTTATCGCCGGGGCGGGTTTATGCGCAGCCTTTAAACGCCCTCTCTCT  
CTGTC ACTCAATCTAAAGCCTCAACTCTTCTGCATATCTCTTGCATTAACGCCTTGCTTGATTAACAAT  
CTCATGATACGATCC TCTCCTTCCAAAATGTTTCCCTCTTTTTTAAGTGTTCGCTATGTTGACACTAGGC  
TTAGAAAGTTCTTGCATGAAACATCCGTCTCTTGTCCAGAACGGGAAAATCTTAGCAATAAAATTTG  
CTTCTCAAGACATTCATGCTTCTTATGGAGGAGTGATCCCTGAAT TAGCTTCTCGCGCTCATCTACAAC  
ATTC CAGAAGCTGCTGACTGCAGCAACGCAAAGCGCGGAGTCTCTTTGGAAGATATCGAATTAATTTTCG  
GTAGCTAATACTCTGGTCTTATTGGAGCCCTATCTATCGGTGTAAACTTTGCAAAA GGGTTGGCAAGTG  
GGCTGAAAAGACCTCTCATAGGAGTGAACCATGTAGAAGCGCATTTATATGCCGCTTGCCATGGAAGCTCC  
CGCC ACTCAATTCCTGCTCTAGGGCTTGCTATTTCTGGTGCCCATACATCTCTATTTCTCATGCCGTGAT  
GCCACAAC TTTCTTTAATAGGAAAG ACTCGAGATGATGCTATTGGCGAGACTTTTGATAAAGTAGCTC  
GTTTTCTCGGCTTGCTT ACCCAGGAGGACAAAAATTAGAA GAAT TAGCTCGAGAAGGTGATGCAGATGC  
ATTTGCCTTTTCTCCAGCTCGAGT TTTCTGGTTATGATTTCTCTTTCAGTGGACTAAAAACAGCCGTCTTA  
TATGCTTTAAAAGGCAACAACAGCTCAGCAAAAGCACCTTTTCTGAAGTCTCTGAAACACAGAAACGAA  
ACATTCAGCATCGTTTCAAAAAGCTGTTTTTATGACTATTGCTCAAAAAC TCTGATATTGTAAAAGC  
GTTTTCTTGCAGTCTTTGATTGTTGGTGGGGCGTAGCAAACAACAGTTACTTCCGTCGCTTGCTAAAT  
CAAATATGCTCTCTTCCGATATACTTCCCTTCTTCGAGTTATGTTTCAGACAACGCTGCAATGATAGCTG  
GGTTAGGAGAGAGACTGTTTTGCAATCGCACACATGTTTCTAAGGAGGTCATTC CATGCGCAAGATATCA  
GTGG GAATCTGCTTGCTCCTAGCATTAGCAACTTCTGGATGTTCAAATCCCTCCTCTAACGCA ACCCATC  
GGTCTCCAGCTACTCACACAGTTGCTGTAAGCGTAAAAGATGATCC TCGCACATTTGATCC TCGAGAGGT  
TCGCCTTCTTTCTGATATCAATTTGATTCATCATCTCTATGAA GGAT TGGTACAAGAA ACTCCTTCTGGA  
GAAGCTTCCCTGCTTTAGCGGAGAGT TTTCTTCTTATCCGAAGATAAAAAACTTATACTTTCAACTTGA  
AAAAAGCTTTTTGGAGCAATGGAGATCTTATTACCGCTCATGATTTTGTTCGTTCCCTGGAATGATGTGTT  
ACAAAATCGTGTGCTAGTATTTATTC TTTTCGCTTTCTCCCTATTGACGTGAAT AAGGATTC TGGATTT  
TTTTGCCAAAGATGATCAT ACTCTTGTATCAATCTCCTC ACTC CAACTCCACATTTTCTAAAGCTGCTTA  
CCC TCCCCGATTTTTATCC TGTGCATTC GCAGCATCAGATATGGAAGAAGAAAAATCTCTTCCGATATC  
TACTGGAGCTTTTTTCTTAAAAGAGAAGAAAGACCCGAAGATGGTTAAAGCTAGAGAAGAGCCCTTACTAC  
TATAATAAAGACCAGGTAGCTGTACAGGAGATCTGTATACACATCATTCCTGATCAACAACTGCTTCTG

CTTTATTC AACCAAGGGAAGCTAGATTGGCAAGGTC C C C C T T G G G G A C A T A G T A T T C C G C A A G A A A C T T T  
AGCCACAGCAAACAAACGACGAGCTCCCAATCATTTGATATATCTGGTACTTCTGGCTTACATTTAAC  
ACTGCCAAAAGCCTTTTAGTCAATTC CAAGCTTCGCCAAGCTTT GAGTCTAGTTTTAAACAAAGAAGCTC  
TTGCCTCCTTGGCTTTTGTTAAACCTGCAAACATCTCCTTCTGCACATTTGCACACCT ACCCAGAGCA  
GCCTCTTATAAGCAACAAGAGGCCATCACTTTAGCTAAATCTTACTAGAAGAAGCTCTGACTGAGCTT  
AACATGACTATTTAAGGATCTAGAGAAAT ATCC TCTTACCTTTTCCGCAACGTCTACTGTGA ACTC ACAGA  
TAGCTCAGATGTTGCGGATCAGTGGCGAAGAAGTTTAG GAAT TACTTTCCCTATCTGCGGGAAA GAATA  
TGCTTTGTTGCAAAACGATCTAATAGGCAATACTTTCTTTATGTCTATAGGTGGCTGGTTTGCCGACTTT  
TCTG ACCC TTTAGCGTTTCTTTCCATTTTCTCCTCGAAAG GAGTCAAACCTTATGCTTTACAAG ATCC TC  
AATTTGATCAACTG ATTC TCTCTATAGAAACGGAAAAA ACCC TCAAAAACGCTCAGCTTTAATTTCCGA  
AGCTTCTCTATACATAGAAAGACAAAACGTCATAGA ACCCCTCTATCACGACGTGTTCCATTATACAACA  
AATAATAA A C T T T C T T T T G T T A G A C T A C A T T C C A G G C C T A G T T G A T A T G C G G T A T G C T A A A A A C T C T T  
AAAAGATGTTTTT ACTC CGTGCCTAGAAAAG ATTC TCTCTTTAAAAATGCGGAGAGGTCTTGTCTAGAGAG  
TGTTAAATTATCACTC TTGGCAAAGGCCTTTTATGTTTTCAACTTGTATCTGTGATTAGATCGCAATAC  
AATATACAAAGGAATCTACTATGCTCAGCTACATAAAGAGGCGGCTGTTGTTTAAATTTGCTTTCTTTATG  
GGTAGTAGTACTC TAACGTTTTTTTATTATTAAGACGATCC CCGGAG ATCC TTTTAAATGATGAAAACGGA  
AAC ATCC TTTCCGCAAGAACTTTAGCACTATTTAAA GAATCGTTAC GGGTTAGATAAGCCTTT ATTCACCC  
AGTATCTTATCTATTTGAAATGTCTGCTAACACTAGATTTCCGGG GAATCTCTTATCTACAAAGATCGTAC  
TGTGATCAGTATTATTGCTGCGCCTCTTCCATCTTCCGCT ATTC TTGGACTTGAAAGCTTGTGTTTT ATCC  
CTCTTCGGAGGCATT ACTC TTG GAATTC TGCGAGCTTTCTATAAAAAAAGCTGCGGCCGAACATTTTTCT  
TTTTCTCTGTG ATTC CAGATATCAGT ACCC GCCTTTGTTATAGGAGCCTTTTTTACAATATGTTTTTGTCTAT  
AAAAT ATTC TTGTCT ACCCATAGCTTGCTGGGG GAAT TTCTCTCACACCTTATTGCCCTCAATAGCTTTA  
GCAATT ACTC CTATGGCATTCA TT ACTCAGCTAACCTATGCTCTGTTTTCCGCCAATTTAAAAAAGATT  
ACGCTTTATTAGCTTACGCTAAAGACTTTTCTCTTTTAAAGGTGTTAATAAAACACATTTTTGCCCTACGC  
TTTT ATTC CCTGTGATTTTCGTA CTCA GCTTTTTCTTATAACAACCTTAAATGACTGGAACCTTCTCTATAGAA  
AACCTTTTTCTGC ATCC CCGGTCTTGGGAAATGGTTCATTTGCAGTATTAACAAAGAGACT ACCC TATCA  
CCTTAGGACTTTCTGTGTTTTATGGAGCCTTTTTCATGCTAACTTCACTTTGTTGCGACCTTCTGCAAGC  
GT GGATAGATCCACAAATTCGTT ATTC TTATGGGAAAGAACGTTCTAAATAATAATTTAATAAAGGATTT  
CTAAAACAAACTCATGTTTCGATCTAGTTCGCTCATACTTGGCGCTAC ATTC GTACAAACAAAATGCTT  
GTATTGGGCTGTCTAAC TTTAGCTGTTTTGGTCTTAGCCGCAACATTTCTTCCCTACCTTT ATCC TGATT  
ACGAAAGA A C T T T T C C C G A A C A T G C T C T T C A G T C T C C G A G C A A G G C G T T T C C T T T T G G A A C A G A T A A T T T  
AGGCCGATGCATGTTGGCTCGA ACTC TTCAAGGC ATCC GGCTCTCTTTGCTCATCGCAGTCTCTGTCTACA  
ATTATTGACGTATGCTTGGGACTACTGTGGTCTACACTAGCTCTTGCCAGTGGAAAAAAGTGGCAGATA  
TTATGAGCC GGAT TACAGAAATTTGTTTTCC ATTC CGCGC ATTC CTGTCA TT ATTC TTTTATTAGTTAT  
TTTTAATCACG GAATCC TTCCCTTATTTTAGCAATGACAATAACTGGCTGGATTC CTATAGCTCGTATT  
ATTTATGGTCAGTTTTTACTGTTAGAAAATAAA GAGT TTGTGTTGTCTGCTCGAGCTTTACAAGCATCAA  
CGTTTCATATTTTAAAGAAAACATCTCCTTCCAAATTC TCTAGGGCAATTATTTCTACTTTAATTTTTAC  
A ATCC CTAATGCTGTATACACAGAAGCTTTCATCAGTTTCTTGGACTGGGAATACAACCTCCTTACGCC  
AGTCTGGGG ACTC TTGTAAAAGAAGGC ATTCATTC TTTAGCTTACC ATCC TTGGCTCTTCTTTATACCTT  
CGTTTTTTATGATCATGTCTCTGTAAAGTTTTAATTGTATAGGAGAAGGTCTACAAACCAATTTGTTAGA  
GGAAAAT ACCC TTGTCTGAAGATTTATTA AAAAT TGACAATCTAGTCGTCTCCGTA AAAAATTC CAATCA  
ACGATTAGTCAATCACTTGTCTGCTCACTATCAAGCGATGCCAAAGTATGGCACTTGTAGGAGAAAATGGT  
TCGGGGAAAACAACCGTTTTCTAAAGCAGTTTTG GGGT TTCTCCCGATAATTGTTAC ATCC AATCTGGAA  
GAATCC TTT ACTC CAGCACAGATATTACACGCTTATCTCGTAGACAACCTCAAACA ATCC GCGGGAAGAA  
AATCGCAACTATTTTCCAAAATGCCATGGGA ACCC TGACTC CTCTATGCGTGTAGGAGCTCAAATTTGTA  
GAAA ACCC TAAGACATCATTTGATATGTCTAAAGAAGAAGCTTTCTCTAAAGCAAGAGA A C T G C T T G A G A  
GTGTACACATC GAATCC CCTGATCGATGCCTACAATTAT ATCC CTTTGAGCTTAGCGGTGGCATGTGTCA  
ACGAGT TAGCATTGCTATTGCTCTGGCAACCA ATCC GGA ACTC ATTATTGCAGATGAACCTTCAACAGCG  
CTAG ATTC TAT ATCC CAGGCTCAGGTATTGCGTGTACTGACACAAA ATTC ACCAAAACC ATTC TACAGCTC  
TACT ACTC ATC ACTC ATAATTTAGCTTTAGTATCTGAACTGTGTGAAGAAATGGCCATTATACGCTATGG  
GGAGATCGTTGAGCAAGGTCTGTGCAAGAGCTACTGC ACTC TCCGTCTC ATCC TTAT ACCC AGCAACTG  
ATCC GCGCT ATTC CTA GAATTC CTAGTCTAGCTATCTTTACCTACAGAACCTCTTGCAACAACCGCGT  
ATTAACCTTTTAAATTAGCTATGTCTACGTTAGTTTCTATTA AAGATCTTTCTCTTACT ATTC GCAAACAA

CCTATTTTGGAGAAACGTGCATCTTCAAATATGTGCGAGGGAATGCCTAACAAATAGTCGGAGCAAGTGGAT  
CTGGGAAAACCTCTCTAGCTTTAGCGATTTTGGGATTAAGTGCCTCCAGATGCTCAAGACTCGATCGATTT  
TCATCTTCCCTCCAAAAACTCCAAGAACTAAAGCGGTGCAGATGATTTGGCAAGATGTCTATAGCAGTCTC  
AATCCCATGATGACTATCCAAGAAATCATTGCCGAACCACTACACATCATGGGGGGTCTTTCTAAAAGCC  
AACAGCAAGAAGAAATGCTCATGCATTGAACTGGTTCATCTTCCCTAAATCATTTTTATCTTTACGCC  
TAATAAACTAAGCGGAGGGCAACGGCAACGCATAGCTATAGCAAAGGCTTTGGTGTGTAAACCGGAATTA  
ATTATCTGCGATGAACCTCTATCCGCATTAGATACTATGAACCAAAAATTGATTCCTTGATTTATTTCAA  
CGATTAAGAATCAATATAACAATGCTTTTTTATTCATCACTCACGATATGTCTGCTGCTTACACTTTAGC  
TGACAAAATAGCTGTTATGGACCGTGGATATTTAGTAGAAATAGCTTCTAAACAAGAGATCTTTTCCCTCA  
CCTAAACACATAAAAAACTCGTGAGCTTCTTGATGCTATTCAGCTTTTACTTTCTTTTTTGATAATCTA  
TCGTTATCCGTAGCTCTTTGTTAATGCTTTTTTTTGTGATAAATCTATAATAGCGCTGCACGCTCTCGA  
ACTGTTATCTTTTGGTGTCAACTTAATGTGGTTTAGATTCGCCTTATCTGCTTAGACTCCGAGCTCCAT  
GGTCGTTGCTCGCTACGGCCTGCTCGTTTTCTGAGAGTCTTCCCTCCGTGAAAAGGCTTGAAGGTTTGA  
CTCATATAAGTGTGTTGACAGAAGATTTTTGGCATGCTACGACCAGGAAACAATCGATTATCCACAAATC  
TTCAGAACTGGAGTAACTTTTGACGATGGAAATCTCCCATATTTTGGAAAGATCTCGTTTACGACAACGGG  
TTCTTCCCTAGAGAAGCCATAGAAGCTGCGATCGTCAAGCATCACCAATCACTCTTATTTACTCAAGAT  
TTTTGGAAGAAGCTATTGATCATGTGTCTGATATCATTGATGACGACTGCTATCAAGGCCATCTTTATGCT  
ATGTACCTTTTAGCGCAATTTTCGAGAACTCGTGCTTCCGCTCATTATTAAGTTATTCCTTTTGGAGC  
AGGATATCCCTCATGCAATTGCTGGGATGTGCTTACAGAAGATCTCTCCCAGATCTTAGCCAGTGTG  
TGATGACGTTGCTCTTATCCAAGAATCAATTGAAACCCCTCACGTAAATCTTATGTGCAAGCCGAGCC  
ATTTCTAGTTTGTAGTGGCTCTCGTCGGCTCCACAAGCTTTCCAGAGAAACAGCTATTCGTTATTTCCGGAG  
AATTACTTAATTATCGGCTAGAAAAAAGCCTTCCCTTGTGTTGGATAGTCTTGTGCTTCCATTTGCGC  
TCTTTATCCATAAGAATTTTTTATCCATTAGCAAAGCTTTTTTCCAGCTGGTCTGATAGATACATCTTTT  
ATCAGTATGGAAGATGTAGAAACCATTATTCACGAAGAATCCATTGATTCCTTAAAGAAGTCTTCT  
CCTCCACAGATCTTATCAACGACACTTTAGAAGAGATGGAGAAATGGTTAGAAAGATTTCCCTTTGAGTC  
ATAGTTTTTATCCAGATAAAATTATAGGGAGCCATGAATAAACACAAACGCTTCTTATCGCTCGTACTCT  
TAACATTTATCCCTCTCGGAATTTGGTCTGCCCCGATTCGATCTCATCGACTCAAAGCGTGGCACTT  
ATTTGCGATATTTACTACGACTATTATCGGAATCATGTGACAACCCGCTCCTATGGGAGCCATTGTTATC  
ATGGGCATTTCTCTCTGCTTGTGACCAAAACATTAACTCTAGATCAAGCTTTGTCCGGATTTTCATAGCC  
CTATTGCTTGGCTGTATTTCTTTCTTTTTCCATAGCAAAGGCGTGATTAAAACAGGTCTTGGAGAGCG  
AGTTGCTTACTTCTTTGTAATAAATATTGGGTAAAAGTCTTTTAGGATTGAGCTATGGCTTAGTCTTACA  
GACTTTTTTATTAGCACCGCAATCCCTAGTTTACAGCTCGCGCTGGAGGCAATCTTTTTCCCTGTCGTTA  
TGGGATATCAGAGTCTTTCGGTAGTTCTGTAGAAAAGGCACGGAAAACCTCTCGGATCTTTTTTAAT  
CAAAGTAGCTTATCAAAGCTCTGTAATTACAAGTGCATGTTTTTAACTGCTATGGCTGGGAACCTATT  
ATTTCTGCCTTAGCAAGTCAATTCGAGTAACGTTAACATGGGCAATTTGGGCTAAAGCCGCAATCCCTC  
CAGGGATATTAGCTTAGCCTGTATGCCTTTTGTACTCTTTAAACTATTCACCACAAATAACTAGCTG  
TGAAGAAGCTGTAGCAACTGCCAAAACTCGCTTAAAAGAAATGGGCCCTTAAATCAAGGCGAACGCATT  
ATTCCTTTAATCTTTCTCTTTAATATCTTTATGGACTTTCCGGAGATTCATCGGCATCTCAGCAACAA  
CCACAACATTTATAGGACTATCCCTACTCATTCTTACGAATATTCCTTGATTGGCAAAAAGATGTTCTTTC  
TAACACTACTGCATGGGAAACCTTTGTCTGGTTCGGAGCTTAAATATGATGGCTTCCCTCCTAAGCGCT  
TTTGGGTTTATTCATTTTGTAGGAGATTCCTGTTATTGGGAGCGTTCAAGGCTATCTTGGAAAATAGGGT  
TCCCTATACTCTTTCTTATTTATTTCTACTCTCACTATCTATTTGCGAGTAATACAGCACATATTGCAGC  
CATGTACCCATATCTTCTTACAGTATCCATCTCCTTAGGCGCGAATCCATATGTTTGTGCTGCCTTAGCCTTA  
GCTTTTGTAGTAATTTATTCGGAGGACTCACACACTACGGATCTGGTCCAGCTCCGTTATACTTTGGAT  
CCCATTTCTGCTCCGTGCAAGAATGGTGGCGCTCTGGCTTTATTCCTTAGCATAGTCAATCTAACCATTG  
GTTGGATTAGGAAGTTGGTGGTGGTACTGTTTAGGATTAATTCGCTAACGTGTTGAGCAAAAAGCTTAT  
GTCGTCGAATAAACATGCTTCTCTTTGTCAAAAAGACGCCTTCTTTGTGTCGGGAGCTTCAAAAAGCTCCT  
GCTCTTCTATTAACAGAAGACATAAGGTTTAAAGCTCTTCTTAAATGAACGCATTGACTCTGTTGCAGAAC  
TATTTCCATGCACTTATAACTCTCCCTACTACAAAATTTATTTGGAAGTCCGATCTTTCCGCTGAGACCTT  
TCCCCTTAAAGTGGGCGTTATGCTTTCTGGAGGCCAGCTCCTGGTGGGCACAATGTCATCTTAGGATTG  
CTACACAGTATTAATAAAGCTCCATCCGGATAGTCAGCTTTTAGGATTTATTCGCAATGGAGAAGGACTTC  
TCAATAATAACTGTAGAAATCACAGATGAATTCATTGAAGAGTTTCGTAATCTCGGAGGCTTTAATTG  
CATAGGAACAGGTGCGACTAATATCATAACCGAAGAAAACAAGCGCGCTGTTTACAACAGCAAAATGAA



CTC GATTTAGAT GGAT TAGTGATTATTGGAGGCGATGGTTC GAAT ACAGCCACGGCG ATTC TTGCT GAAT  
ATTTTGCTAAGCATCAAGCAAAAACGGTATTAGTTGGTGTTCCTAAACTATTGATGGAGATTTGCAGCA  
CCTATTTTTAGACCTCACATTT GGGT TTGATACTGCTACTAAATTTT ATTCATCC ATCATCAGCAACATT  
TCTAGAGACGCATTATCGTGTAAAGGCCACTATCATTTTTATTAACTAATGGGCCGGTCTTCTCTCATA  
TCACGCTA GAAT GCGCACTACAG ACTCACCC AAATATTGCTCTTATAGGCGAAGAGATTGCAGAAAAAG  
CATCTCCTTAGAAACATTA ATCC ATGATATTTGTGAAATAATAGCAGATCGAGCTGCTATGGGGAAATAC  
CATGGCGTT ATTC TCATCC CTGAAG GAGT CATT GAGT TT ATTC CTGAAATACAGTCTCTGGTTAAAGAAA  
TT GAATCCATTC CAGAGCAGGA GAAT CTTTACCAAGCTTT ATCC TTATCTTCTCAGCAACTTTTATGCCA  
ATTTCCGGAAGATATTTGCCATCAGCTCTTGTATAATAGAGATGCTCATGGCAACGTCTATGTATCAAAA  
ATTAGTGTGATAAACTTCTG ATTC ATCTAGTTCGTCAACATTTAGAAACACATTTTAGACAAGTTCCCT  
TCAATGCAATCTCCCATTTTTTAGGTTATGAAGGGCGTTCAGGA ACTC CTACACATTTTGATAATGTGTA  
TAGCTATAACTTA GGAT ATGGTGTG GGGT TCTCGTTTTTAACCGCTGTAAT GGGT ATTT ATCC ACGATC  
GAAGGTCTAACTAGCCCTATTGAAAAATGGCGATTGCGCGCTTT ACCC ATTGTTTC GAAT GTTGACGACCA  
AGCAGGGGAAAGACAGTAAACATT ATCC TCTGATAAAAAAAGATTGGTAGATATTGCTAGTCTGTTTT  
TAATAAGTTCTCACTGTATCGGAAAACTGGGCTTTAGAAG ACTC CTATCGCTTTGTAGGGCCATTACAA  
ATAC ATTC TCCGGG GGAT GCTC ATTC TGATGATTTTCTCCTTTAATTTTGTTTTT GAAT CATAAT GAAT  
GGCAAAAACGCTGTTCTATTTGTTTAGAA ATCC CCGATCAGGAT TATTAACCATCTCAATGGACATAACT  
AAAGAGCTTCCCTTCAATTATGATGCAACAACCTCAATTACTTCCCTC ATTC AAAAAAGATCTTTGAAATAC  
CTCTATTAGATAATGTGACTTCTCTAG GGGT TCTGCAT ATTC CTC ACTCTCAAGAAAAACCTTTCTCT  
TGTTATCGTGTTCAT GGGT TAGCTTCTAGCAAAAATGGAACCAAACGTTTCTATCTCCATCTAGCTAAT  
CAACTAGTACAAGAAGGTATCG GAGT ATTAC GAGT TGATCTCCAGGGCATGGTG ATTCGGAA GGAT TTA  
TCC AT GAAT TTTCCCTTACCATTAT ATTC AAGCCTCTCAAAAAATC ATTC AGTTGGTCTTTCTCTGCC  
TCAAGCCAATC ATTC TGTGCTTGTGTTGGCTCGTCTTTAGGAGGCAGCTT ATCC CTACTGAACCTTCCC  
TACTTCCAGAG ATTC AACATGCTGCTATTTGG ACTC CTACA ATCC AAGGGGCTTTATGGTTAGAAGACA  
CTATGCAGTCTATGTGCCCCCTCTCTCA ACTC CCCCCTGATAATTTTTCTTATCAAGGT ATTC CTCTGG  
GAAAAA ATTC TGCTACAATTTATCGAGCTCGATACCGTAGATGCGCTTTCCAAAATCACGCAAGAAGTT  
TCT ATTC TTTACTTACAAGGCGAAGACGATGCCGTTGT ATCC TTACGTCATCAAGCTCTTTTTGCAAAA  
CTTTCACAGGCAAAGCTTCTATCGCACAT ATCC TAAAATG ACTC ATCAGCTTTGCATAT ACTC CGAAGC  
TTTTCAAGACCTTGTGATTGGCTAAAACATCAATTATTGGGCACACCATGGAGCT ACTC TCTGTAATA  
AGAGCTACTTTGAACTACAAGACTACACTATCGTCCAGATA ACTC T GAGT CTATT GAATAGCTTGTGTT  
GATGCAT ATTC AGGAAAAGCCTTCTTCCGAACCGGCTTCAGATTTGCTAGCTAAGCAT ATTC CTCACCTA  
TGTGCTCTCCAGACCTC ACTC TTCAAAAAGATGCTCCTTCTTCTTCTGAGCCTTTACGTATCG GAGT TT  
TACTGTCAGGAGGACAGGCTCCTGGCGTACATAACGTAGTCATC GGAT TATTTGAA GGAT TACGCGCCTT  
TAATAAAGAAACAAAGCTCTTCCGTTTTATTAAAGGCCCTCTTGGACTT ATTC GAGGATTATATAA GGAT  
CTAGATATCTCTGTTATCTATGATTATTACAATGCTGGA GGGT TTGATATGCTCTCTTCTAGCAGAGAAA  
AAATCAAAACAAAAGAACAGAAGAGCGCT ATTC TTGCTACAGTAAAAAAATGAA ACTC CACGGTCTGCT  
CATTGTAGGAGGAGATA ACTC CAATACAGACACTGCAATGCTAGCA GAAT ATTTTATCGAGCATAATTGC  
CCTACAGCAGTTATTGGTGTCCCTAAGACTATCGATGG GGAT TAAAAAACGCTT GGATAGAAA ACTC CTT  
TAG GGAT TT CATAACATCTTGCCGC ACTT ATTC TGAAATGATCGGAAATTTGGAAAAAGATGTTCTTTCT AC  
TC GCAAATACCATCATTTTGTCAAATGAT GGGT GAACAAGCTTCTCACAGTACGTTG GAAT GCGGTCTT  
CAGACACTGCCTAATATT ACCC TAATAGGAGAAGAAGTTGCTGTTCAACATGCCTCTTTACAAAGCTTAA  
GTCTCAGTATTGCTCAA GGGT TGATCGAGCGCTTTCATAGAGGGAAAGACTACAGTACT ATTC TC ATTC  
TGAAGGCTTAATCAAACAA ATCC CTGATACAAAACGATTAATCC AAGAAT TGAACACTTTAATTGCTGAA  
GAACAATTTTCTGTTCAATTTGGACCAACAATT ATCC CCAATGGCTATCGAAACTTTCTCTCTCTC  
CAGAAAAT ATTC GAGACCAATTACTTCTAGATCGAG ATTC TTATGG GAATATTCGGGT ATCTAAAATTGC  
CATTGAAGAGCTTTTAGCTTCTTTAGTTAGCAAAAGAAATCTCTAAGCTTGAACCTACAATGTCTTTTCT  
CCTGTAACACATTTTCTA GGAT AC GAAT CTCGAGCAAGTTTCCCTTCTAATTTT GATTC CAATTATGGTT  
TAGCATTAG GAAT AGCTGCTTCTCTCTTCTTAGTAAGAGGGAAAAACA GGGT ATATGGTCACGATAGGCAA  
TCTAGCAGAACTTATACC GAAT GGACCATCGCAGG ACTC CTTTATACAAAATGATGCACTTAGAAAA  
CGGTTCAATCAAGAG ACTC CAGTAATCAAAACAG ATTC TGATCTCCAGATGCCCCATGGCAAAAATATT  
TACATAAAATGAAAGAGATCTGTTTATTAGAAG ATTC GTACCG ATTC CCCGGACCCTTACAATATTTCGA  
AGAACAAGCTCTTGTGATCAGCGTCCACTAACATTACTTTGGGAAAAAGGAAAAATATCGGA GAAT AAC  
GCGACAAA ATTC TAAGAAAACAACAGGAACTGTGCGTGAAAGCTAGAA GAAT CATAGAAACGAGGAGAT

AGCGGTAGTCGGACTTGAACCAACGACACGC**GGAT**TATG**ATTC**CGCTGCTCTAACCACCTGAGCTATAACC  
GCCTCAAACAATCTAAAAAATTAGCGGGAGAA**GGATTC**GAACCTCCGACCTTT**GGGT**TATGAGCCCAACG  
AGATGACCACT**ACTC**T**ATCC**CGCGGTAGAAAGTCTAAGATTATCAC**ATTC**TTAGATTTTCATGCAAGTAA  
TTTGGCTCTTTAATATTTCCCATGTCGTGTTGAAAGCTATTTTCTCCTGCTTCAAAAAGATTTCCCCTT  
TTCAATATAAGCTTGGCGGTTTTTTTTCGTTTTTGAAGAAGATCTGTAACCTACATCTAAAA**GAGT**TTCTTTG  
TTCACAGAAAGTCTGCTTCTTTTTCCCGCAACCTTTCAGCAAGAACAGATTGA**GAAT**AAATATAAGGTC  
CAAACATAAGAGGGCGCCTCTTTTTGAAGAGGCTCTAATAAATTATGCCCTCCTACAGAT**GGAT**CGAAAGT  
TCCTCTACAAATGCAATATCTGCTGCA**GAGT**AAAATATCTTTAAT**ACCC**CCATAGCGTCCATAATTA  
**GAAT**TATATTGCCGAAAGAAGCACCTTG**ACTC**CATA**ATCC**AAATAAA**ATCC**CAGCCTTTTCTAGTAGCT  
TAGCATGCTCCTTTAACTTCTCAAGATGTCTAGGA**ACCC**CATAAAATTTTTGTAGAA**GAAT**TGTGGAAATG  
TGAAACCACTTCAGCCCATACCTCTACATCTTTA**GGAT**GCATAGA**ACCC**AATACAATTAAGCG**ATCC**TGA  
GAAGATATTTGTAATTTTGCTCTCCAAAATCTCGGCGATTTGTGGCAAGAGA**GGATTC**TATAAACGTTT  
TCATGTTTCCAGTGACAT**GAAT**CTT**ATCC**GAGGAAATACCTATCTGCATAAACCGTTGTTTATACAGCTC  
GTCTTGTAGTATCAATAAATCTAACGGAGCAAAAATA**ATTC**CCTCCTAACCGCTTTAAAAAAGAAAAACGC  
TTACAA**GAAT**GTTCCGAAAGTTTGCCATTAATCAAAAAGGCTTTTGCCCTAAACGTTT**GGATTC**TGTC  
AAAAATGTAACCAACAGTCTCCTTCTGAAAAGATCACGATATCAGGAGCAAGCTTGCGAACCAC**GGAT**TT  
AATAATACAACCTTAA**ATCC**AGAGGTAAAACAAATACAGTAGCGCCAAGAG**ATTC**CATACAAACGACGAGCG  
GTGTGCACACCAGCTTCAGAACACGTTGTAACAACAAACCGCC**ATTC**TGAAA**ACTC**TTCTCTCCATCGAT  
TAAGAAGGGGAGCCAACAGACTGACTTCCCCACAGAAGCTCCATGAAACCAAACCTAAAGGGCTTCCCC  
TTTCACGAAAGGTTTCTGT**ACCC**CAAACC**GAAT**TTTCCAAGAGTCAATATATTTCCCATGAAAAACACT  
TTGTAAAAAATACGTGGCGCCGAAACAAAAAAGCGAAACTAAAAACGCATCATAGAGACGAGATGTTA  
ACCAACGTCTTATCATACAACAAAGTTTACCAGTCGAGCAGGAACAAAAATAGCCTTTTTTCACTTCAC**AC**  
**CC**CTCTAAGTACTTAGATGCAG**ATTC**CCTTGCTAACGCTAGGACTTCTTCTTTAGAAG**ATCC**TTCATAA  
TATCTAGTCGAGCTCGAAGTTTACCATTTACCTGAACCTACAATAGTAACCTGCTGTTCTTCTAAAT**ACTC**  
AGGCAAAAC**ACTC**GGCC**ATCC**GGACTTCTGAACACCAGGAGAAT**TGC**CTAACAAAC**ACCC**CACA**ACTC**TTCA  
CTAATGTGAGGAGCAATTGGAGCCAAAGCCCGAACAGCCATTTCTACAG**ACTC**TT**CGGAT**ATACAGCGA  
GCTTCACAAAGTCATTGATAAA**ACTC**CATAAAAGAGGACGGTATCGT**ATTC**AAAGACAATTTTTCAATAGC  
ATCTGTT**ACTC**GCTGCACAAGCTTATGCGCTAATGATAAGCCTTCAAATTTGTTATCTTCTTAACTCGA  
TCAGAAGAGACCATTTATAAAAACG**ATTC**AAAAATCGTCTGCAACCAGCA**ACTC**CTTGGTTAGACCAGA  
**GT**TTATTTTTTATCTAAAGGCCCTGAAAACATTGCGTAC**ATCC**GAACAGCGTCAGCTCCAAATTCATCTAT  
CAAGATCTGAG**GGATCCACCC**CATTTAATTT**GGAT**TTCGACATCTTTTCTTGACGGAC**ATCC**A**ACTC**TTCT  
CCCGAAGGAGCA**ACCC**ATTTCCCGTTTTCTTTTGGCTGTTTCA**GGAT**ATATAT**ATC**CTTTCCAG**GAA**  
**TG**CGATAAGATGTCGCCAATACCAAGCCTTGATTGACAAGCTTCTTAAAAGGCTC**GGGT**GTTGAAACAAT  
**CC**CAGCTTCATAGAAAACCTGATGCCAGAAACCGGCATAAAGTAAGTGCAGTACAGCATGTTCTGCACCT  
CCAATATACAGATCTACTGGC**ATCC**AATATTGTTCTTTTCTTTCCTTGGCCAGGGAGCGGCC**GAGT**TGTGGG  
CATCGCAAAAACGTAATAGTACCAGCAAGAGCCTGCCATTGAGGCATGGTATGTGTTTACAGTTTCCC  
AGCTCGTTGTGTCTCCGTGTCGAAAACCTTGT**ACCCACTC**TCGCACCTTAGCCAAAGGTCCTTGTCCG**ACC**  
**C**CTTCTGGTCGATAATCTT**GAAT**TTCCGGAGGTAACAATGGAAGTTCATCGTCTCTTAAAGGACGACAAG  
AGCCATCTTCAAAT**GGAT**AATCGGTATAGGCTCCCCCAATAACGTTGACGCGA**GAAT**AGCCAGTCTCG  
CAACTTATAAGCGATTTTTGCTGCTCCAAGATG**ATTC**TCTTCTAAAAAGTTAATCACATATTGCTTAGCT  
TCTTCTCCGGACA**ATCCATCC**AAATGGA**ACCC**TTCAACAGCTATTAATACAGACACCTTCTTCATTA  
GCACGGAGACTACAGGTAAATTAACCTGTTCCGCAAAAAGCAAATCACGTTTCGTCATGAGCAGGA**ACTCC**  
CATGACAGCTCCTGAACCAAAGCCATTAATACATAATCTGCG**ATCC**AGATAG**GGAT**AAGTTCTG**GAGT**G  
ACAG**GGAT**GTTTTGCGTAAG**ATCC**CGTAAAG**ACCC**C**ACTC**TTAGTTTTTCATCTCGCTGATGCGATCTCTTT  
CGCTTTTACTTTGTGTTTCTTTAATACTGTGCCACAACAGCCTTTTGCTCATCAGAAGTGAGGAGATC  
GACCAAG**GGAT**GTTTCCAGGAGCTAAGGCTAAAAAAGAA**ACTC**CTATCAAAGTGTCCGGTCTTGTGTGAAG  
ACTTCTATTGCTCCATGTTCTGTGGCAAAATTAACAGAAGCTCCTGAAGACTTCCCA**ATCCAATTC**TTCT  
GCAATGTTTGGACTTTCTGGCCA**ATCC**AGCTCATCTAGTCTTCTAGGAGCTG**ATCCGCGAAT**GCTGT  
AATACGCAGC**ACCC**ATTGGCGAAGC**ATTC**CTCTTCAACAG**GATACCC**CCCATCAACAGAAA**ATCC**GTTT  
TCAATCTTTC**ATTC**GATAAAACAGTCCCC**ACTC**AGGACAATAGTTAACAGCCATATCGGCCATATAGG  
CTAAT**CC**TTTTCTCATAAA**GGAT**TAAAAAAGCTTTT**GAGT**CCATTTATAAT**ATTC****GGAT**CTGAAGTAGC  
GA**ACTC**TCGACTTTCGTGCTAAGAGA**ACCC**CATTGCAGTTAACTGTTTCTTGAATTAGCGATGTTTTTC  
TCTGTGGTCTCTCTT**GGGT**GTTGTC**CCCGT**GCGTATAGCATACTGCTCTGCAGGCA**ACCC**AAAACT**ATCC**

AACCCATAGGATGTAAACTGAAAACCCCTGGGCTCGCTTACACCTTGCACAATATCTGTTGCTGTATA  
GCCAATTAGATGCCCCACGTGCAACCCGCCCCAGATGGATAAGGAAACATATCTAAAACATAGTATTTT  
GTTTTAGTTTCATCCTCCTCAGCCTTAAAACTTGCTCGTTCTTCCAAAACCTTTGCCATTTTTCTTCTA  
TGAGACCGGGATCATAGCGCATAGCACCTAACCTGTTGTTATTTTTAAGTTTTCTCTCCTTACAACCGC  
CTTGCACCTAGAGAGAAATAAGCGTCAAACATACACTATGTCTGAGATCGAAATCAAGTCTCTCCAGTC  
TGC GAATCCATCATCTTTTTTTTTAATGCGATCC TGGTATACACTTCCCTTTCCCAATCTTTACAGAGAT  
CTCTGCTTATGTCCCACCTCTTCTCTAAAGCCTGTCAATATTTTCCAGGAGGAGT TAATTC CCCTGTTAG  
AGCGTGTGAGCCGTTAATATC ACTC CTCTATAGTAGCTCGTGCCTCTAAAGAGGTTTTTATAGATTC  
CTGGATAAAACGTTTATAGACTTTTGTGGATCATGGGGATCTCTTATCCATGGACATAGTCACCC TAAGA  
TTTTGTGCAGCTATCCGACAGGGCTTAGAACGAGGAAGTTCTTATGGCCTCACGTCCGAACAAGAAATTC  
CTTTGCCGAAGAAATTTTTTCGTATTTGGAT TAGAGACAACTACAAAATTC GCTTCATGTCCACGGGA  
TCGGAAGCAACTATGACTGCTGTTGACTTGTAGAGGTATCACAGGACGACCTATTATCATTAAGTTTT  
TGGGATGCTACCACGGCCATGCAGATACTTTTCTTCAAGAAAAACCC TTTTCCATACTTCGCTAGACAC  
TTTAGACCTCGCTCATCC TCTT ACCC TCTCTCT ACCC TTCAATGATTTCCCTTATTTCAAACCTGTTATG  
AATAGCTTGGGGCATAAGGTCGCTGGAGTCATTTTTGAGCCTGTATGTGCGAATATGGGGGTGATTC TCC  
CCGTCCCTGATTTTATTGAAGGAGTTATCCAAACCTGCCAGCAGACC GGATCTTTTTCCATTATGGATGA  
AGTGGTGACGGGATTCGGGT CGCACAAAGGTGGAGCTGCGGCTTTGTATCATGTGAAACCTGATATTC TTT  
GTTTTTGGGAAAATTTTAGGTGGAGGCTTACCTGCATCAGCAGTTGTTGCACCTAAAGACATTATGGACC  
ATCTGGC ACCC GAAGGAAAAATCTTCCAAGCTGGAACACTTTCAGGAAATCC TTTGGCTATGATCGCAGG  
GAAAGTATCTGTCAACTTATGTGCGGAACAAGGTTTTTACACACA ACTCGCAACTATTGAGCAAAACTTT  
TTATCC CCTATTGAACACATGATTC GAACTACAGGAATCC CTGTTACATTGGTGCATATGGAAGCCTCT  
TTTTCTTTTTCTTTA ACCCAAATAGCCTAACAACTTTCGGGAT GCACAACCTAGCGATATCGAAGCTTT  
TCAAAGTTTTATCAACTCTGCTTCTCAAAGGAGT ATATCTGTCTCCTTCTCCTTTTTGAAGCCAGCTTT  
TTATCC GCAGCTC ACTC TATGGAAAGTTTAGATTACGCCCAAACCTGCATTGATAGAAAGCTTGAACAAG  
TCTTTTCTTTAGTTTAGTAGTAGATTTTTCAGGAAT TGTGATAACGAAGCAAACGCCCTCAAGATGTT  
GGAGAACATCGGACCACATTC TTTCTGGAGCATCAGTAAAAATAATTTCTGACTC GAAGGAGCTAAGAA  
CCACA ACCC CTCTAAAACTC TTTTCTAACTGGCCACCTTGCCAACCACTGTATCC AAAACATAAGAGC  
ATCTTGTGCTCAC GAGT TCGCCCCCTTTTTTACCAGCAAAGAAAAATCTCCTCCGAGAAATACGGACG  
GACAAATTTCTATAGAA GAATTC GCACTATCTGGGCTCGTATGCAACAACATAATCTGATTC GCTTGCAG  
AGGGCCTCCCATACAAAAGCGAACCTTTGACTC ATCAAATGATCTAAAGGAAAAATTTCTTCTGGC GAA  
TCAATTTCTAGAAT TTTGTTAAGAAT TAACCCAAAAGATCC ATTTGGACTATGCTCACAAAGCAAACCA  
CACTTCTCGAAAAAATGCCTCCATTAACATCTGGAGAAGCTACAAGCAAAGAACCCTTGTCTAAAAGGGC  
GTAAGGAAGTTTTGTACATAACATCTTATTGTAACAATCTAATCTTCGTATG GGATAGCTTCATCAAAAAT  
GGACTTCACACAGA GAATAGGGACTTGATACTTAATTGCTAAAG GAATGCTATCACTGGGACGAGCATCT  
ATGTCAGCTATGTACAAACGGTCTCCCCGCTTCTGCTCTAAAAACAATCGT GAATAAAAGACATTATCCCT  
TGTATTC TGTAAATGACT ACTC TCACGACAGATAGATCAAAGCTTGTTAAAACAAAGTTGAGAACGTCATG  
TGTTGAAGGACGTGAGCGCTCTTCTTCTGCTGCCAGATCTTACGTTTTTTGAAAGCGGTATCC ATTGAA  
GCGTGACCATAGATGGCGAACTGTTTCTCGTCCGTTCCATAAATA ATCCCTGCATAGTTGCGGAAACTTA  
CTAATTTATAAAAAATTAATTAATAATAGTGAAGTGTGCTTATGATTTCTCGATCAATATTC ATTATGTT  
CTTTTTTTCCGACAATAGAACCCTCGGCCTAACCT ACCCACACCTCGGCTTTTGTATAACAAA ACCCGAC  
ATCAATAATGCCAC GAATTTGTAATAGTCTAATCATATCC TCTTCGGATTCGCATAGGAATCGGGT GTA  
CGCACATCGTAAATATAATTGCCATTATCCGTGATAAAACGTTCTCCTGCAGAAGTTTCTCTCCATTC TC  
CAAAGTATCCCTGTTTATTC AATATCC TCTGTACAGAAGAGCAACCAAAGGAGCAATCTCTATAGGCAA  
TGAAAACCTCCCTAATGTGGGAACAAGTTTTCTTTTCTACTA GAAT AACATTGCGCTTCCCGCTCTGA  
AGAA GAATTTTTTCTCGGAAAAGAGCTCCCCCTCTCCTTTGATCATACGTAAGCAA GGATCAACTTCAT  
CCGCTCCATCCACGACCAAGTCTACATCTTGCAATAAA GAATGATCC AATAAAG GAATCC CCACTGCTTC  
AGCTAATAGCTGAGATATCC TTGAAGAGGCTACCGCTGTGATTACCAAACGTTCTGTCCGAACACGATCT  
CCTAAAGCCAAAATGA ACTC TCTAGCCGTCGAGCCGCTCCCTA ACCC CACACACATTC CTGGCTCCACCA  
AAGCTACTGCCTCTAGCGCTAGTTCTGCTTGATAGGGAATAATTTGTGCGGAAGAAAAA GAGT TCTC GGG  
TTGTTTAGACATAAACCTCTCAAAA GAATCTAAAAAAGGAGGGCTTCTATTC CTCAAACAGTAATCC TAC  
AACCTCTTCAAGATTC CTTCAAAGCTTTATCAAGACTTAACCAAATAATGCAGGTAGAGCTCGTTAATT  
AACGAAAGGTCACCTACTCTCTGGCA GAATTC TGTA GAGTCT GAGT ATTACAAAATAGTAGCTAGCTGAT  
TCACTTGCCTACAGAAAAGACTC CTC GAGT ATACAAACCTAATAAAAAATGTAGAGAGA ACTC GTTCTAA

GAGT TTTTTTCTGATGAAGGTA AAAAGGTTCTCAATTTCTTCTGCAAGCCTACTTGTCTAAAGAAGCG  
CTTAACCACAAGA GAAT ATTGTCTTCGCATAAAGGT GGGTAA GAAT C GAAT AAAGCTTGTAATTGCTTAA  
TAACTTCAAGCATACTGCAAAATCAGCCTTGAGATCTGCAGAAGAAGCTTTTGAATCAATCC TAAAAC  
CCCTGAAG GAAT TTTCTGGTCTAAAGCTTTCAACAAAGAGCTTAACTGCTCTTTAGGACTACCTTGACTA  
CCTGAAGACTT GGATTC AAATCGCTTAGGAAGAGCTCTTAAACAACAGCCT GGAT CTATATCACGATACA  
AACAAGAGACTTCTTCACGTGACTTTTTCTTAGTCTTTTTATCTTCTTCACGTAAAAC TTTCTGCA ACCC  
TGCAGCCCAAGCG GAAT CTTGT GAAT AACTACTTGCTAAAGCAAGAGCTGAAATCAC ATTC CCTGTATCC  
AGGAAATCATAAATACGATTTCTTACAGAGAC ATCC TTATATTTCTCAGCTACAGCAGTTGTGATATACT  
GATTGT ACTCC GGATTC CCCAAACACCAACCGGAAAAGAAAAT ATTC AATGAAAAGAGGGAAGCCTCTAA  
AGCTAGCTTTCTTTCCTTATTGTCTTTCAAGTCTTT ACTC ACCAAA ATCC CTTGGT GAGT CTTCTCAATC  
AAAGATAGAAAGGGAGCTGCAAATTTCTTAGGAT CAGAAAGAGCTCCACACAACCAACCAGCCGTTAG  
GGAATCC GCCTTGAGGAGGCTGTAACATCTTCTCAGCATGACGCGTAATCTTTA GAAT CGGATTC TTGTC  
TGGTGA AAATGATACTAAAAAACACCTGCTAAATGAGAAGGTTCTATAGG GAAT GGAGCATCTTTTTCT  
GTAG GAAT TAAAGCGCTA ATCC CCTCACAGACAAAAGTGAATCATT ATTC ACTC TATCAAGATGCTGCT  
TATATTTTTTATAATCTGTCCCA ATTC CTTTTTGAAGAACACGCATTTTCAGCGCTTTTTTTG ATCC CAAT  
CCGATTAGGGGAGA GAAT CATCTGCTTGTCCGAAAATAAGCG GAAT ACTAGCACCACGTCCTTTACGGAGA  
GTCCCTAAAATAGGTG ACTCC CGAAAAGTGATCTTGCAGACC ACTC AAGAAT TTA ATTC GTATTGCAA  
CAAGCTTAGCATTAGCTATATATACCAAAAACGAAGCTGTTAATGCTACGATCGATAAAGCAAAGAGA AC  
CCCTACAACAATTGAAGCTGCAACTGG GAATCC GGAACAGATAGAGCGACCACAAGCAACAATAATAAT  
GCTGCAGCTGCTACAGCAGAGACTA ACCC TATAAATGGCTTTGTCTGGACCGAGCCATGGCTCGATCAC  
ACT GAGT CTCTAAAACTGAAAA ACTC CTCTAGTA GAGT CGGGAGGAT TGAGAGGA GAGT CTGTTGCGAT  
AAAACTATTTTTCTTTTTTAATTTTT ATTC TACACACATT GAAT ACCAAGGTTATTTTTAATATAACTGA  
TCTTTAGAACGGGGAAAATCGCAG GAGT CTTTCATTTTCTTTACCTCATCTTCTCAAAGATCTTAACTAA  
AG ACTC CAGAAAAGATCGTTTATCTTGAGGTTTTCTCCTACGAAATAAATGTTTGCATGCTAAGAAAGAT  
TTATAGACAATCTGCCATGTGCG ATCC GCTCTGACGGAGAGCGTGTGCGCTTTTTT GGGT TTTCCCAT  
ATTTAAAATAGGAGCATCTTC GAAT GACAACGATTTTTGATCTTCTTGGTAAAGACGCCGACTATCTCCT  
TAACCACAAGTGTGTTATAAAAAAGAAGCTTTAACGCTTCTTCTGGAGACTTCGTATCAC GAGT TTTT  
GCAGAAT CAGACAGAAATAATC GGGT GCTCCGTTCCCTTCAACAGATGTTTCAAGTATGGACGCTTAGGGC  
GAACAGGAT ACCTCTCT ATTC TCCCTGTTGACCAAGGTGTCGAACATACTGCAGGCGCATCGTTTGCCAA  
GAATCC TATGTACTTTG ATCC AGAAAATATCGTGCCTCTGGCTATGGAAGCTGGCTGTTCCGCTGTAGCT  
TCTTCTATGGCGTGTAAAGTATATGGCTAGACGATATGCTCATAAA ATTC CTTTTTTACTTAACTAA  
ACCACAACGAAGTCT ATCC ACC GACAACATATCACC AAATCTTCTTTCAGTCAAGTTGAAGATGCCTA  
TAATATGGGAGCTGTGCTGTCGGAGCAACGATTTACTTT GGAT CA GAGT CTTCTTGAAGAAATTTGTT  
GCTGTTGCCGAAGCTTTTGCAAGAGCTAGAGAGCTTGGCTTGGCTACAGTGTATGGTGTATTTAAG GA  
ATCC ACATTTTGTGT GAAT AATGT GGAT TACCACACTGCTGCCGATTTAACAGGGCAAGCGGACCATCT  
TGGAGCAACTTTAGGAGCTGATATCGTTAAGCAAAAGCTCCCA ACTC TTCAAGGA GGAT TTTAAAACAATT  
AATTTAGCAAGACTGATGATCTTGTGT ACTC GGAGCTTTCATCAAACC ACCC TATTGACCTCTGTGCGT  
ACCAGTACTTAATAGTTACTGTGGAAGGTTGGTCTAATTA ACTC CGGAGGCCCTTCTGGGCAAGATGA  
CTTTGCTGAAGCAGCTAAAACAGCAGTAATTAATAAACGAGCTGGTGGCATGGGACTGATTTTAGGGAGA  
AAAGCTTTCCAGAG ACCC CTCTCTGAAGGCGTCCGGTT ACTC AATTTA ATTC AAGATATTTATTTAG ATC  
CGACAATCTCCATATCATAATTTAGAGGG ACTC ATGCATCATCGCAAATCTTCT ACCC CATT GGGT ACTT  
TTACTGTAG GGAT GTT ATCC CTTGCAGTAGTTATCAGTTTACGAAACCTTCTT AACAGCAAAACATGG  
CTTATCT ACTC ATTC TTTTATGCTGTCGCTGTAGCCTGTTTTATG ATTC CTTACGCACTGATTGCAGCA  
GAAT TAGCTTCA TTC AAACCACAAGGTATTTATGTTTGACACGAGATGCCTTAGGAAAACGCTGG GGAT  
TCTTTGCTATAT GGAT GCAGTGGTTTCATAATATGACTTGGT ATCC CGCTATGTTAGCTTTTATTGCTAG  
CACACTGTTTACCAAATCAGTCCAGATCTTGCCAATAATCGACTGTATTTGTC ATCC GTT ATTC TCTTG  
GGT TTTTGGGGGCTTACCTTCTTAACTTTCTGG GAAT TAGGAACATCAGCACTATTTAGTTCTATCTGTG  
TAATTTAGGAA ACTC TA ATCC CCGGAGCCATCTTAGTTGCTTTTGTGCTTACT GGATCC AAGGAGGCAA  
CCC TATCGCCATTA ACTTTTCTTG GAGT GAAGTCTTCCAGATTTCTTCTCCTTCTCCTCGTTTGTCTA  
CT ATCC GAAT GCTACTAGCATTATGCG GGGT TGGGAGC GAAT GCCAATTTGGCTTC GGAT ATGGAAGATC  
CTAAAAGAACT ATCC CAAAGCCGTTTTCATAGGAGCTGT ATCC ACTC TTGCCATTTTGGTACTA GGATC  
ATTAGCTATTGCTATCGTA ATTC CAAAAGAAGAAAATAGTTTATGTTTCTGG ACTC ATTC GAGCTTTTTCT  
CTTTTCTTTGAGAAAATAACCTTTCTT GGAT GACAGGTATCATCGTAGCTATGACGATTGCCGGCTCTC

TAGGAGAACTTAATGCCTGGATGTTTGCGGGAACCAAGGGGCTGTTTCATCTCTACTCAGAATGATTGCCT  
ACCGAAGATCTTTAAGAAAACAAACTCTAGGGATGTTCCCACAAACCTCATGCTTTTCCAAGCGATCGTG  
GTTACCCATTTCACATTCATATTTGTTTATGTAGACTCTGCAGACCTAGCTTACTGGATTTTAAGCGCGT  
TAAGCGTGCAAATGTATCTAGTCATGTATATTTGTTTGTTCATAGTCGGTCCTGTACTCCGAATAAAAGA  
GCCTAAAGCTCAAAGACTTTATTCGTACCAGGAAAACCTGTGGGAATGTGTGTTCTGTCTACCTTAGGG  
ATTC TTTCTTGCCATTTGCTTTGGGAATTAGTTTCCTCCCCCTCAAGAAGTAGTCTCTTTTTCAACCA  
TGGGCGGCAATTTTGGCTACACAGCTCTTCTGCTTTTAGCTTTTGTTCATTAAGTGTGTTATTCTTTTGG  
AATGTACTATTC TCACAAGAAATTAATTAATAAAATTC TTTTGCACAGAAAAGGGCTTTGTAAAAGAAGCT  
CTTTTCTTTCTAAGACTTACCTGGATTTCTAATTCGCAATCTTTAAAATTTCCCTCATGTTTACACTAC  
AATGTAGTCCTCCATGGACAAAATTAGGGAACGTGTTGAAAGTTTAGTGCGCAAAGCGCTGTATACGCA  
TGCTATGTTACAAAAGCATACGCGTATTGCTGTTGCCCTGAGTGGCGGTAAAGACAGCTTGTCTTTGCTA  
CTCATGCTAAAAGCCATTTCTGGAAGAGGATTC CCAGAATAACTATCCATGCTATCCATATTGGAGGGA  
AATATTC TTGCGGAGCGGCCGTACGCGGAAT TATCTCTCTTCTATTTGTGATAAGATCCAAGTCCCTCT  
TATTTCTATCCCTCCCTTATGAAACAGAGAATCC T GAGT GCTATACCTGTTCTCGTATTAGACGTCGC  
CTTCTTTTTGATACAGCTAAAGCGGTAGGAGCGACCGCTGTGCGATTCGGACATCACCGAGATGATGTTG  
TCCAAACAACACTAATGAATCTTCTCCATAAAGCGGAATTTGCGGGCATGCTTCTGTGCTTGACATGGT  
TAACTTTGGGAT TACAATCC TACGCCCTCTTATTTTCATTC CCGAAGACCTGATCCGTAAATTTGCTAAG  
GAAAGCGGCTTTGCTCGAATCACTTGTGCTTGCCTGTTATTTCTTACGAACAAAAACTGAAGAAGCTT  
TAAAAACCTTGAAACGATTTTCCCTCAAGCAAGACATAATATTGCTTTGGCTGTTGAGAAAACAGGACT  
TTCCAAAGCAAATCGCGTAGAACAATACGACTCCTATTAACAGAAAACCTAGTCTTTTCTAGATTTAAA  
TAAAAATTTATATTAATCATAATACTTGGTTTATTTTCTTATTTTAAAAAAGATCTAATAGCTCATT  
GCGCAGGTTTTTATGCGCAATGAAAAGTATAAGAGGGGGCTCATGACAGAGACACGACGACTTCGCATTC  
TTATTACCAATGATGACGGTATCAAAGCCAAAGGAATCAGTCTGCTGATTTCTCTACTCCGTGAAGCTGA  
CTTCGCCGATCTTTATGTAGTAGCCCTTTAGAAGAACAGTCTGGGAGAAGTATGGCTTTCTCATTAGTA  
GAGCCAACCTGCCCTTGAGCCTTTTGATTATCC TCAAAGAGTCCAAGAAGCTTGGGCTGTCACCGGC ACTC  
CTGTTGACTGCGTGAATTAGCTATAGGAGA ACTC TTTAAAGAGAACGCTCTGGATCTTATTTTATCGGG  
TATTAATAATGGGAAAAATTC CGGACGCTGCCTTTATTACTCTGCCACTGTAGGAGCTATAAGAGAAGCG  
AATCTCCATGGAATTC CTGCGATAGCTCTTCTCAAAGTGAGAATATCGCTTTTTTCCAAGAAGCTCATA  
TGGCCTCCCTAATTC GTTCTTATGCGAGTTTACCCTTGCCTATAAGCACACCGATCCCTTAGGACTTAA  
TGTAATTTCCCGCTAGCGCGGACGATTC TCCATGAAAGGAATTC GTTTCACACTTTCTGAAAATGAA  
TTCTTATTCGGTATCC CAAGATTAGTCCGTACGGAAGGAAATCGTCGTTACTATACGCTCTATGATATGC  
GAGATAAAGTATCCGAAGAGTCTCTGAAGAGTATCTTGTCTTAGCAAATAACTATATTAGTGCAGCTCC  
ACTAGTTTCTAAAAATACCCCTCGAGCAACCC TTTCCGAAGAAGAACTAGCTTTCTAAAAGACTC TTTT  
GAACAATCTGTGTTGTGGAAGCTTCTTTAAACTTAGAAGAAGATCTGGCTTAGTTATCTGTATGTTGAA  
ACGAACCTCAACGTACTTTTTTCAGCAAGAAAAGCTCCTTCTGATTACAATAAAGATCTTTTACACCTA  
TAATCC CATAATATTC GAAGGGT TTAGTCTAGGAT TGTATTGATTC AGCAGCTTATCAAATGCAAATAT  
GCTTTGTTTGCAGCACTATTTCTTGCATCTTCTACATTGTTCTGCTTTTCTCTCCCTTGCACCCCTTTT  
CTCTCTTTTCTTAGGCTCTATAAAAACGATCTCTCTAGGTGGAAGTGCATTTTTTATCGCCCGCCTTT  
AGGAATGATCGTAAACCAAGTTGTGGACTGTGCTATTGATAAACGCAACCC TCGCACCCAATCACGGGTA  
CTTCTGCGAGACTTCTTTCAATTAACATTC CATGCTGCTTCTGACTCTCTGTCTTATCC TGTTCCTAA  
GCACTTGTGGCTATTC AATCC TCTTTGCTTTTCTCTCGCAGCTTATCTACCC TAATTATGATTATCTA  
CCC TTACACAAAGCGTTTTACGTTCTTTGTCACTGGATTTTGGGGCTGGTATACTATCTAGCAATACTC  
ATGAACTTTTTTGCCATCATTGAGACTCCTTCTTCTCTCTATTTTGCATGAGT TCTTTATTAGGAATTT  
CCTTTGGTATGATCATTGCAGCAAATGATATCATTTATGCACTGCAAGACGTA GAGT TTGATCAAAAAGA  
AGGCTGTTTAGC ATTC CTGCTCGATTTGGAACGAAACAAGCTATTACAATTGCTTCAGCTAATTTAATA  
GCTAGCGCAATAGCTTACCTTCTTATGGTTATTTGTTCCGAAT AAAACCATCTTCTATCTATGCTCGC  
TTGTGCCTTTTAACCGGTATTC TTCGCACAATTAAGCACTATTC TCTTATTGACCC AAGAGCTAAGTCTAC  
TC TTTCAACAAAATTTCTTTCTTGGGAACCTTTCCCTAGGTATCGGTTTTTTGCTAATATGATTGGACTA  
TTTTTACTAAGAGGAATCTTATGAAGCGCTACGTGGTGGGTATTTCCGGAGCATCTGGTATTGTATTGGC  
AGTCACATTAGTTCTGAACCTTGCAGATTAGGACATCATATTGATGTCATCATATCGCCATCCGCACAA  
AAA ACTC TTTATTATGAGCTAGATAACCAAGCTTTTTTATCTACAATCCCTCAAATTTCCATAACCAGA  
TTGTTCTTACCATATATCC TCTATAGAAAGTTCTGTATCATCAGGCTCGAAT ACTGTAGATGCAACTAT  
TATAGTTCTTGCAGCGTAGCTACTGTTGCAGCAATCTCATGTGGTTTGGCCGATAATCTTTTAAAGAGA

GT CGCTGATGTTGCTCTGAAAGAAAAAGACCTCTGATTC TTGTACCACGAGAGGCTCCTCTATCCGCAA  
TACATTTAGAAAACCTTACTCAAGCTAGCACAGAATGGAGCTGTAATACTCCCTCCTATGCCTATTTGGTA  
CTTTAAACCTCAGACTGCAGAAGATATAGCCAATGATATTGTGGGAAAAATCTTAGCCATTTTACAGCTA  
GATAGTCCCCTTATAAAAAGATGGGAGAACCCCGCTAATGGGAGTTCTCTTTTCGTTGATTACTTCAT  
GTAAATTTTCAATAGCAATGAAGGCGCTAGGGTCTTCTCTGTGCACAATCTCTTTAAGCTGGGAAAGCTG  
CAACCGTTCGACAACGATATAAAGAAGATTTGAGGCTCCCCAGAAAAACCACCTTCTGCATGCAAATAA  
GTCAACCCTACCCCTAAAGTCTCCATAAGAATGTTTCCCTAATTTTCTAGGAGAAGAGGTAATGATAGTTA  
CAGACTTAGTGTCTTGAATCC TAAAATCACCATATCCATAACTTTAATAGCCACAGCATAACGTTAGCAA  
AGACATAAAAGCTGTATGCCAATTGCGGTAAACAATGCCGCCAAGGAAAAGATGAAGAAGTTTACAAC  
AAGATGACTTGCCCGACAGTATATCC TCTCTTCTTATTTACGATGATCCCTAAGATTTCCGTTCCGTCAG  
TTGCTCCTCCGTGACGAATAATCAATCCGCCTCCGGCTCCCAACACA ACTCCACCAAGGACAATAGTTTC  
TATTTCTGAACCGTCAAAAATAAAGGGT TGTATTC CCAGCCACTCAGGCAAAACTTCTATAAGCCATAAC  
CAGCAAGAAAAGATAATAACCGCAGTTATCATCTGTACAACGAAGTACTTCCCTATGCGCTTATAAGCCA  
AAATGATGAATGGCAAGTTAAACAACACTAAAAACACTGGAAGGAACTGATGCCCGAAA GAATGAGCTGC  
TATCATAGATAACCCAACGATCC CACCATCGATTAATCGTTGGGAGCGAGAATCATATGAACACCGCAA  
GCGGCTAAAAATCCACCTATGATAAACCAACTAAGAGTCTTAGAAAAATATAGAGGGAAACTAAATTTTG  
TGAAACGTATGGTATGAGCCATTGTTTACCCCTTGTTGAAGCTCGCGAGAGACGGGGCTCGAACCCGC  
AACTTCCGCCTTGACAGGGCGGTGCTCTAACCAGTTGAACTACTCCGCGCAATTTTGGACACGACAGGA  
TTTGAACCTATGACCCCTGTGTGTAAGACAGGTGCTCTAACCCTGAGCTACGCATCCAAAAGACTAGA  
CGAGGACTCTATCAGAATAAATACTTTAAATACAAC TGT TTTTGTTCACAACGCAATTTTTTTTCAAAA  
ATCC AATAAAGCCCTAAAAGCCCTCGACTCTTTAGCAGAAAGTTGAACAATCGACTGCTCTTTTTCTCT  
GCTCAATAAGTTCTCTAATCGCGATAACAACAGCTTCTTGCTCTTTAACTAAATTC TCATTAGCAAGAAGA  
CTTTTCTCTTGTGCAGCATGCATATCGGACACTTGTGAGCATAGCGTTCTAAAATGTTT CAGTGGAATAC  
ACTAATTGCTTTTTAATTC TTGGTTTTCTTGCCGTAACAATTC TACTTGATCC TCAAGCATCTTTTGTTC  
GCTTTATCCAAAGACACTCGCTTCATACGCAAAAATAGTTTATAAAGCCCTAAACTCAAACAAACAGCGC  
CTAAGGCAGATAAAA ACTCCAACACCTATCAAACCTGCAGAACTTCTAAAAGGGCAAAAGATAACACCAT  
ACCTATCCCAATAGAAGTGCTCCAATCAATGTAAATGCTACAGACGCAATCTTTCTACGAAGAGA ACTA  
TCACACTTTCTTTCTTTGACCGCTGAAACTACCTGATCTCCCGTACTCGACGATCTTACTTCTTACAAT  
TTGTACGAACACAACAGCAACGCATATCGCTCCTCAATTTCTGTACGTAGTGAATTC ATTAATCACAGAT  
TACCAACAACCTTGCTACTTCGGAAACATTTAGACGTTCCCAAAGATTAAGAGAGAAAAAAGCCTCTTC  
ATAAGAAGAGGCTTTTGTCTCGGCAAAC TACACCCGAGAGCCGTAATTTGAAATCATAATCATCGCCATCAC  
TGCTATCCGATTTAGATCCAGGTCTATGAGATTAACCGATTTCCGCGAAGCCTTTTCTCCGAGACAAC  
GTCGAGATGAGCCTTATAGTTTAAACAAAAGCTTCTCACATTCCTCGATAGCTTTTTATTAGCCGTTTTT  
AGCATCC TAATGAGATCTCCTCGTTCGTAACAAATACGAGAGT AGTGCTCTAACATAGCTTTT CAGCTCTT  
CTATCTGTTTTCTTTAGCAGGCAGGACTTTTAGTCTTTCTTGATACCCCTCCAGCTTCTTTAGAAGATC  
TCGCACATCTTCTCAAGATTCAGACAATAAGCTTGGCACGCCTTTAAATTTTCTCGTAAATCACGTCTC  
TCTAAAAGACTTGCACACTTAGTATCCAATTC TCTAGAGCTTTAGCCAATTGTTGCTCTAATTGTGAGA  
TTTTCTTTTTGCTGAAGGAGGAGT TGCTCGCGAGCTTCTATTC TTTTAGATCTCAAGCAACAAC TACA  
TGTATTCGAAACTCTACCCCTAAAATAACAGCTCCCAAAGCAACCAGAGCGACTCTGCATAGAAGAAG  
AGAGGCGCGTAAAGGTACAGAAT AAAGCCAATAACAACAGCACCACCAGCAGCTGCTAAAAGCCCTAAAA  
CCAACGCAGCGACAGCACTAATTTTATAACACAACCCAAAACCGTTTTTTTTTGTTCAGGTGCTGGCGA  
TAGATCATTAAATTCGTTATTCGTTCTACTCTATTAGAAGTCCCTAATGCTAAACTC ACCATTTTTCTCT  
CCTTTCCGTTAAAAACAGGAGAGAAATTTGTACATAAACATTTTTTTTAAAGAAATCAAAAAGCCATTTGCA  
GGCAGATATCAGGCCATTTATATCAAAAACAGAAGGAATGATTA GGATAAAACCTTTGTCTTGCCATCGTT  
CCAGAGAGCATTGAGAAGCTGTTTTTATTATAAATACATTTGCACTAAGAATCTTAAAATCGAACAGACAA  
CACAATGGCTCGAACAGACTGATCCACACGCACTAATTC AATGCAAAAAACTTCTAAAATGAACACAGC  
AAGCTTGATAAAAACATATAAAA GAATTTGGATCATAGAGCTTTACGAGAAGGGGCGCACTGCAATCTGTC  
TCGACCAATAGCAATGCAAACAGATAAATACCCCTAATCATTGGGAAAAATTGAGTGTAGAATAGCCTC  
TTTTCTTTCTCTATTTGTTGCTTAGCTAACGCGATTTCTTCTTTAGAGATATCTGCAAGTCTCTGCTTA  
TCCAAAAGCCTTGCTCTCATTTTCCAATACAAATCTGTCCAGAGAACTTTTTTTGGCTCTCCACCAT  
AGCCAGAAATTC TAGTAAGAACAGCACCTAGCATCACAGATCCAAAACAACCA GGGTAAACACTACGTT  
AATCATAGGAAGCGTAGTCCAACCTGCCCAATAAATAAGGCTGCTCCTGTAAC TATGAATAAAATACTA  
AGAATACCGAGCGCAAGCACAGCAATACGTTGCTACAACAAGAAACTCTCGCTTTAGAAGCGCTATCCA

CCAAAGGAGCCTCTGGCATATAACTTCTAAGAGGTACACTATCTCCAACAAA**ACTC**ATGGC**ATCC**CACTT  
AAGGTAAGAGATCGGTTATCAAAAAGAGAAGCTTTTCTCTAAATAGAAAAGCGTATCGTCA**ACTC**TTTT  
ATAGATCTAAAAAGTCTTGCTTTCTTA**ATCC****ACCC**ATGAAATTTAGCATAAAAACC**ATCC**AACAT**ATT**  
**C**ACACGCTCTTCTAAAAGGCCTATTTCCCTATTTTTCT**GAGT**CTCTAAA**ACCC**TATAATGGCTGGAAATT  
TTCCGCGCACTTTCTTGCTTCTTGTAATAGCTGATCT**GAAT**TGCGTATCACAGATAACAGGTAAGAAA  
CTA**ATCC**AAAAGCTCCTATACAAGAACCAATAATTGCAGCTCCTCCACT**ACTC**CTAAA**ACTA**AGGA**GA**  
**ATAGACTC**CCCCGAGACAAAGAAAA**ACTC**CTCCTAAAGCTGCAAGCAA**ACTT**GTTAGAAC**ACTA**CAAT  
AACTGGTATGTTTTAGAACGGT**GAAT**AAAG**GAGT**TGTTAGCCACATTTT**ACT**GTACCTCAGTTTTGCT  
GAACAACA**ATTC**CCTAAAAAATTGGTAGGACGCCAAACGTT**CATA**ATT**ACTC**TACTTGAAACCATTAAT  
AATTATCTCAGACTTTCTTCCAATACACATTTCA**ACCC**ACTTTGAAGCTGCTCTATTTTTTTCTGAGCAA  
GCTCTAAATCTTTGCTCTTTTGAGCAAGCA**ATCC**TTCAACTTCTTTCAAATCTTCTTCTGCTTCATATAG  
AAGTCTTGATAAGATAACACTA**ATCC**AG**GAGT**CACGGCCTCTGGAGCTA**ACCC**AGAT**ACTC**TGAAGG**G**  
**AGT**CTCGTCGGTTTTAAAGAAA**ACCC**ATACATATAAACTAGACTTCTCCTATACAGGCAGAA**ACCC**AGTG  
TCATTGCTAATAAGCTAA**GAAT**AGGAGCAAAAAGAGAGACACTTCTGAAAAAAGAAGCAGAAGAGC  
ACCACCTAAA**ACT**GTAGT**ACCC**CTAATACCAGGGCACCTATTGCCAACAATTGCTCTTTACGGCTTGTA  
GTAGCTGAGCACCGATAGTTTT**CAGT**ATGATCGGCACGCAATGGTTGCTG**GAAT**TACAACAAAAAGAAA  
TATTAACATGGCGCCTCTATTT**CG**CAAAAAGGCCGACATGCTACAGGAAAGCTAATTAAGTAAAAAT  
TTTTATATATTTCAATGGTAGTTAAATACCTAATCT**ACCC**AA**CC**AAAAGATGTCTAAATGACAAAAAAT  
AATCGTATTTATATTATCATGAGACACTTATAGTCACATCTGCTT**C****ATTC**AGCTCAA**ATTC**TAATGAAA  
ATC**GGAT**TTAGAAGAAGATAG**ACTC**GA**GAGT**CAGA**ACT**AGCCAAAATGTTTGTCTA**ATTC**TATTTG**C**  
**AATCC**CCGACTACAAGACCAATAGAAACGTTA**ACCC****ACTC**CTAAAGCCACAGAACCAATCATAATCG  
CTCCAATACCTAAACGGCAACACAAGCGACGAT**CC**CCTGCAAGCAAACAAAGCAAGGCTACACA**ACT**  
TAAAATAGCAAAA**ATTC**CTAAGGAAACGGCAA**ATTC**TATATTTCTCTT**CG**TTGCAATAAATATGCGTC  
TTATACAGACACA**ACTC**TGCGGGGCTCTCCAG**AGT**TGGAGCGCAAGAGGAACAAAAAAGATAAGACATTG  
TCG**ACTC**CGGACCAAAAAAAGGCCGCGATAATACGCGAGATGGTAAAATACACAAATATTTTTGACATA  
GAAAACCTTA**ACCC**TCCTTT**CAT**CGCGTGAGACTA**GAGT**GTAAAACAAGATGCGAAAGCAAGGTT**CAGT**  
TATCTGCTATGTTTGGAAACAAACCTCCACACGGTCCC**GGAT**TATCAAAACAAGCTT**CC**AG**GGAT**ATGT  
TAGAGAACGTCCT**ATCC**ATACCAAAGCAACATATAGACGCTTTTGTGAAAAGACT**GAAT**AGAG**GAAT**CT  
AAGAAGCTTGGTTAGCGTCTATAGATGCTTTAAGAGCAGCTTTTCTTTT**CAG**CACT**ATCC**ACCATCT  
TGTGTAGCTAGATAAA**ACTA**AGCGCACATCGGACAATAAGCTTGCTCATTTTTCTCTAATCTGTCCAAA  
CAATCAATCTCAA**ATTC**CATTACCTTAGCTTCCAAAGCTTGGAGATCGTCCGTAAGACCTCGCAGAAACA  
TCTTATTAATGAAAGAGACGGAGGCCAAAGCGTCTTCTCTTCTGAAAGATTACGCAAACGTTGCTCAGC  
CAAAACATTTTTGCTTCTAAGCTAGCATAAGA**GGAT**CGATACATAAGACGAGAT**ATTC**CCGC**ACCC**ACA  
CAAGCAG**ATCC**AAATAATTAATGCAG**GAAT**ACCTATTACAGTAAATATGACATTGCTAGCGCACAAAACCA  
AAGCTAAT**ACCC**CAGCGACAACA**ACTA**AGCGCCTACGATAGCTAAAGCTAT**ATCC**AAAATTTTGAACA  
AGT**ATTC**CCTTTTGTGAAGACGAAGTAGATTTTGTCTCTACGCAGGAAGCTGTTGGCAACGGTAAAGAA  
GAAGCGTCTCCGTAATAGTAGT**ACTC**ATTTTTCCACCTTTTTATTTTTAAAGCGGAAAA**ACT**GTATCAG  
AACGGCGCTTT**ACTC**GCAAATCACTATAA**ATCC**GCAACATGCAGAACTAAAGCGCCGTAAGCAAAAGGA**A**  
**CCC**CTA**ACTC**TCAGATGCAATATCTGAG**GAGT**CTTTAATTATTTTTTACGACG**GGAT**GCCTGCACCTGCA  
GCCGCTCCGATAATGCCTT**ATTC**TCAGATCTCAATTTACACA**ACTC**TGCTGTTAATTGACTGCAAGTGTT  
CTGATTTTGTGCAACCGCTGTTAAACCTTTCTGTCTGATGAC**GAAT**TTCTTGTTTAGC**ATCC**TCCTCA  
ATGGAGCAAATTGTTGCGGCATGACGCTTACACAAATCTAATATTTTTTCTTCCA**ACTC**TTGGCA**ACT**  
TACTTACAGCTCGACGAGCTTCAAGGTT**CG**CTCGGTAACCTCAGAAAGAGCTTTAT**ATTC**TTCTCAAG  
CTCTCTATTTGCATAGAGACAACTTCTAACTGACGCTCAATCTCTACACGACGACTTCGTGCTCTAGCA  
AGGCCTA**ATCC**TAAAAGAAGGGAACCAACCATAACTAAGATCATAACCAGCAGCTAAAGAAGCTG**GGGT**CC  
CG**ATTC**CTACTGCTGCAATCACA**ACCC**CCGCAGTAGCAACTAAAAGTCCATAATAATTAAGCT**ATCC**  
ACAAGTTTTT**GATCC****ACTC**TTGCGGAACACATTTGTGCGATTGTATCAACGCGACT**GGAT**ATGGCAGCT  
GCTCCTTTTGGCAAAA**GAGT**AGCAGGTGCACCT**GAAT**TAACATTAGAACAGCTCATTATTTCCCTAAA  
ACTTAATGCCTAAACAA**ACTT**GGCAAAAGATTATAACATAATAGCCATTTTTAAATA**ACTA**ATAATGA  
AAGCTA**GAAT**TGACAAAATTA**ACTT**TTAACAATTTTCTTAAC**ATCC**CCTATTAGAGAGCTCCTTTCTT  
GCAAAAAAATCTCTCCTTTCTTACATTTAGTCTCAAAAGATAT**ACCC**CCTCTCAGAAAA**ACT**GAGGTTT  
TATGCGCTC**ACCC**CTGAA**ACTT**TT**ATTC**TCTCTGAAAAAAGCAATATGATGCTTGGCTTAAGCATACTG  
CTTGGTTT**GCT**CTG**GGAT**GGCCGCATCTATCTTT**CG**TTTCTCTTAGTGCAGAAGTCATTTCCGGCTGTTT



TTTTAAAGCTGCTGAGACTTCTTAGTCTGCCTCTTGTATTTTTTGTCTATAGGTTGACAATCACTTCGAT  
TAACAATCTAAAATCCATGGTCTCTGTCGTGAGATCCCTCTCTACTATACCCATTGACAATCTTTATT  
TCGGCTGCCATAGCTCTAGTTCTATTTATCTTTATTAAGCCTTCTGTTCCGTTGTCCGGGTTAATGCCG  
CTACAGAAACCAATGCGACAGGCTACCTCTCCGCTTATCAAAAACGATACCCGGAAATATTTTGAACC  
TTTCTGAAAGCAATGTGATCGCTGCCGCTTTTTGTCTGCCTTGCTAGCAACTTTCTCGCTTCCCTG  
CCAGAAAACGAGCGCTTATTCGTTGAAACGCTTCAATACTCTATTCCTCTTGTCTTCTAGCATCTCTA  
AGGGCATTCATAAAAATGCTCCCCTAGCCACATTTGCCTTCTCTCTTCTTTTTGTGAGAAATGCGAAC  
AGGTAATTTGAACTTTCATCTTTTGAAGAATACCTGTTTTGTATTGTACAGCTAACTGCCTTCAAGGA  
TTCCTAGTTCTTCCCTTCTTCTCAAGATGAAGGAATCTCTCCTTGTGCTACGTTAAGCTCATGTCTC  
GCCCCCTAGCAACTGCGTTTTTCTCCAAATCTTCTGCAGTTACTCTGCCTTTGACCATGGAAGTTGCCGA  
GGAAAACCTACACATCCGACCAACAATCTCCCGTTTTGTTTTCCCTCTGTGCTCTGTTATTAATATGAAC  
GCCTGCGCCGATTCATTCCTACCACAGTGTGTTGCTAGGAGTCTCTAACGGAATCGTCTTTCTCCTT  
TATCACTGATTAGCTGGGCTTTTATTGCAACTTTAGCTGCCGTAGGAAATGCAGGCGTTTCTATGGATG  
CTACTTCTAACTTCATCATTGCTAGCCTCTATGAATGTCCCTCTAGGCTTCTTGGCCTTATTCCTCCT  
GCATATGCCTTGTTAGATATGCTAGAACTTTGATTAACGTTTGGTCTGATTGCTGCATTGTTCTGTAA  
TTAATAAAAAATTTTCTGAAACAGAAGATCTCCCGCCTGCTCTTACACCAATGAATAGCGAGCCTTGAG  
ATACAGGTCTTTATCAGCTCAAAAACATCGCTTCTATTAGAGGTAGAGATGAAATAATTGTTGAGCTACC  
ATCGAAGAGCTATTCGTCTTAATCACGAGATCTTTTCGTTTGAAGGATTTGACTGCACAGGTCCTACT  
CCTTCTATGACTACTCTAAAAGGAATGATTTATGAATAAAAAAATACAGTATTCCTCATCAAGACTAGG  
ATTCATTTTGTGATGATGGGAGTTGCTATCGGAGCCGGGAATATTGGCGATTTCTAGAAATGGTAGCT  
CAAAATGGCGGCGGAACCTTTATTCCTTCTTGGTTACTGTTTCTAATTTATTTGGTGGATTCCTTAATTA  
TCGTTGAATCTCTATAGGGAACCTCACTAGAAAAGCTCCCATCGGCGCTCTGATTCGAACCGCGGGCC  
TAAATCTGCTTGGCTAGGAGGATTTATTGTTCTTGTAGCAACATGCATACTTGGATACTACTCAATATT  
GTGGGATGGGATTTAGCTACTTCTTTTATTCCTATCCGGGAAAATTTGTCAGGGAACCACTTTCCTC  
AACTTTGGGCACATCACTGTCAAAGCTGGATGCCTCTAAGTTGCCACTGTTTAGCTCTATTTCTCGCTTA  
TTGTATCATTCGGAAAGGAATCGTTAACGGAATAGAAACTTGTAAATAAGATTTTATCCCGTTCTTTTCT  
ATTTGGCTCTTGTCTATTAGCTAGGGCGGTATCCCTGCCTCATGCTTGGGAGGCATTCGCCTACTCT  
TTGTATTTAACAAAGCTTCTCTGTGCGATTACAAAGTATGGATAGAAGCTTTAACCCAAAATGCTTGGGA  
TACAGGAGCTGGTTGGGGCTTCTTCTTGTATACGCGGGATTCGTTCAAACAACCAGCTTAGTCACC  
AACGGAGCCATTACAGCTATCACAAATAATTTTATTTCTTTTCTCATGGCTGTAATAGTGTCTCCGCTT  
GCGCATCGTTAGATTCACGGAAATGTTAGGATTACGAGAAGGCGTCGGCGCATCCAAATATAGGAATGGC  
TTTTATTTATCTCCAGAACTATTTACTCGGCTCCCTCATGCCACATTCCTCTACATTTTTTAGCGCA  
ATCTTCTTCTAGCCTTCTCTATGGCGGCCCTATCTCGATGATCTCGATGCTGTTCCCTTCTGTGCAAA  
CATTAACGAATTTGGCATCAAAAACATATTGCAGAATCTTCTGCAACCATTGCTGCGTTTCTTATCGG  
AGTTCTTCTGCGTTGAATTTACAATTTTTTGATAACCAAGACATAGTCTGGGGAATCGCTCTTATTCCTC  
AATGGCATGATTTTTATTTATTCGCATTGAGCTACGGAATTAAGCGCTTAAGACAAGATGTTATCAATT  
CTGTTCGGGTGATTATAAATTAAAAACCTTACTTCGACATGTTGGTAAAATTTTTACTCCCTTTAGAAG  
AGTCTTACTGTTAGCGTGGTATTTCTATGAAGGAGCAATGCTTCTCAAGCATATGGTGGAAATCCTTTT  
GTTTCTATAACATTTCAAGTTTACTCATGCAGTGGGATTAGGCGGAGGGGTCTCTTCTTCTTAAACC  
GCAAGCTATACACAAAATTTACTTGAACAACCTAGATTTTAACTGAGTTGCTTGTAAAGTCTTTTGCATGA  
TATACTCCTTGGCCGATCGGGGCTTCTTAATTCATTAAGGCTCTTTATTGTGATTCACGGAGGGAAATA  
TGGTTCATTCCTGTATACAATTCATTGGCTCCAGAAGTTTTAGCCAAGTCTCTATTCACCCAGTCAGAT  
TCCAACCAGCAAAAAGTAATGATTGCGATAATGACTCTTTTTTGCCTCACAGCCATTGCAGCAATAGTC  
CTTTCCATCGTTACAGTTTGTGGAAGGTTTCTTCTTCTTGTGCTGACTTAAACCCGTAACCTATTGGTG  
CATGCGTATCCCTTGGCGATATTTACTTGCATAGCTACAACGTTATTACTTCTTGTCTCCGTAATATCGA  
ACTCTAGCCAGACCGCAAGTATTGACCTCTCCACTCAATTCAGCCCAACAAAACCTCAAAGAATAGGTC  
GTCGCTCAGCAGAAAATGAGCTGAACGAAGCGGGAAGACTCACTGATTAAGCACATAAAGATAAGGCAAC  
GTTATGACGTACTCTATGTCCGATATAGCACACAAATTTGATATTTCTAATCCACAGTCTCCCGCTCCAT  
CAAGAAAACGAGGATCCCTTCCCCACAATCTCCTTCTGCCGTGGGCTCTTTAGAGGGAGCTAATTTCTC  
TACATGGGGCCAGGCCCTTCTTCACTGTCCCTGTTTATCCACAACAATCTGCTGCAATGCAAAAACAC  
CTTTTTACATTGCAACAGAGGTTTCTGCTCTCAAGAAAAAATTAGTTCAAGTCTAGTCAGACACGCAGGAT  
CTTTAGGACTCGGCCGAGTTTTTAGCGGCATGCTTAGTTGCTGCGACAATCCCTTGCAGTAGCTGTTAT  
CGTACTTGTCTTCTTAGGGCTTGGCGGTGTTCTTCTTCTTGTCTCGTTTGTCTGGCTGGGTTCAACTAAT

GCAATTTGGGCTATTGTGAGCGCCTCCATCACTACACTGATTTGTTGCGTTTCCATTGCCTGCATCTTCT  
TAGCAAATGTGATAAGGGATCTGATCC TCAAAC TTTATATGTAAGCTAATTTTT GAATTAGATTTAATT  
CTAAAATTTCTTGAAATTAACAATTAATCTATTAGCATGCTTCTTTCTGTAAAGGAAGCGGATCGTTG  
CGAGCCTTGCCTTTTTTGCTTAGTTGCGTGC GGAGAGGAAAAGCGAGCTCTATTATTTCTTCTATTGG  
GGCTCATCTGGAGCGTCGCTGCTACGGTTCCCTTGCTCTGGGGGAGAGCCTGTTCTTAGAAGAAATTGG  
AGCTGAGAAGCTGCCCTTTGCCTATTGGGAGCATCC TTTTTTCTTTGCTTCATTTCGTGTTTAATTC TC  
TATAACCTCTCTCGGAAGCGAGTCTCTCAAAGGCTCTTTTCTTTCTGTTTCATATCTTGCCTTCTAATCT  
GCAACCTTTACCTTTTTTGGCATCTAGCCATACACAA GGGT GTTTCTGGC ACTC CGACTTTTTCTCTATAG  
GATCC TTATATGGGGGCTGACAATTC TTTGTTATGCCAATTTTTGGGGT TTATAGATCAATTTTTTAAT  
ATCC AAGATGCCAAACGTCAATTTTTGCATTTTTAATGCCATTACATTTTGTGGAGATTTTTTAGGGGCAC  
GTATCGTCAACCAGATTCAGTATCTCGGAGCCGAGCTAATTC TTCTCGCTTTTATGTGCGTAATTACTTT  
CATATTC CCTCTGGTACACTACATTTTCATCGTCACTAAAAGAGCTTTCAGAAGATCACGATCTCTTCCTT  
GATACTGGCTATCC CCCTTCTACCAAACAAACTTTAAAGCTGTGTTTGAAGGAT AAATACACCTTTTACT  
TGGTTAGTTTTTATTTTTCTTATGCAGCTTCTTGTGCTATTCACAGAGT TCAATTTAAAAATCTTTGA  
TGCACAGTTTGGAAACGCTGAGACTTGTGAGT TAACAGAGAAT TTCACTAAGTACTC CTCCTGGAT TTCC  
TTAGGAAATATGTTCTTTGCCTTATTGCTTATAGCCGAGT AATCACAAGATTTGGAATCAATAACATCA  
TTC TCTTCGCTCCCATCTGCTTCTTTAGCCTATTC TGTGTTGGTCAATTTAAAC TCTGTCTTCATAGC  
AACAAATGGGAAT GATCGCTAGAGAAGGGCTTGCTTATGCTTTGGAT GATAATAATCTACAGTTATTAATC  
TATGGCATCCCTAATAAAAATCCGAAATCAGGTGCGGATCGCGATA GAATCTTTTGTGAGCCTGCGGGGA  
TGTTTCATCTGCGCACTACTATGTTTATTCATCC CGCACCAATACGTACTC TGTATTATCATTTCCGCCGT  
GTGTATTC TTTTAGCAATATTGCTACGCACTCACTATTC AAAAGCCATTC TTAGAAATCTCTCTCTAGAA  
TCAATACATCGTAGACGTTCTATACGCGAATGGTTGCGGATATGAATGACACTGAAAAACGCCAAGCTG  
AAATCC TTTCTGCTAACGCATTTAAAAAACCC TCAAGAACGCAACCAATGTTTGCCTTCCAACACTTGT  
GAACCTAAAAAATCGCGCAGTACTC CCAACCTACTTCTTCACATGAACAAGTTGGGCTTATCAGGGAAA  
TTAAAAACCC TGAATATGTTAAAAAATAGCGTATGGGCGAAAGATTTCCCTC ACTC TCGAACTATTTAAAC  
GTTGGAGCAGCCTTCCCAACATCC GACCATAGCAGCAGCTCTTCACCTCTATTTTGTAGAGCATGACTT  
GCTTCATGTTTCCGATATTGCCGATGATCTTTATGATCAGTCTGGAGACCGTCTATTTACAGCTGTTCTC  
ATCGTAAGAAAACATAAGCCTGGTGGAGAATACCAAGCTCTTGCCGAAAACATCTCTCAGAAAATTC TAG  
AATCTGAGGATCCGAGT TAATAATTAAGGTCTTTCTATCTTAGCTTTGGAAAGAAGCCCTCAAACCT  
CCCTATTATCC TCCCCTTCTTGACGCATCC TAATGAACAAGTATTTCTACAAGCCTGCTTATCTCTAGAA  
ACTTGTGCAGATAAACAATATGCTCAATACGGGCGGACGGTCTCAATACACTGAAAAGACAAAAGACA  
CACAAGCTGCACAAGCTTTACTGAACACTCTAGCTGCCCTCTTGGATGCATCC CTAGTCTATGAGTTCGT  
TCTTGCCTCAGTTCAACTCAAAAATGTCTTACGCAAAC TAGCAGAAACGATTC TAGCCTCTCTCCTAAA  
GAATGTATTC CAATTTAATTGAAATGGTCGCGGATATTC TCTACACAATAGCTGCCGATTATGGCAG  
CAAAGGCTTTGAGCCACATAGATAGTCAACTAAAACGTTAGCTTTGAAAATTTTAAAGCTAAGGC  
TGCTAAAGCTTTATTC TACGACTACCATAAAAAC TTTATCC AAAAACGCTACCC TCGCTACGATCTCCAT  
CTGCTTATTGAAAGCCTGGAAGCAAATTACCAAGCTGAAGTCAATTTTATGTTAGCCTTTTAGCCATCG  
TCGGCTCATCAGATTATGCAGATGTTTTAATTAGATCTCTTACAGGGAAAACCTAAAAGCTAGAGCTCA  
AGCTTTAGAACTCTCTAGAAAAAGATTGCGAGAACCCTTGTTC ACTC TTGTACACCTTTTGTATATCGC  
GATAAGCATACTTCCGACGAGAAATATTATATGAAAAAGGTGTGGAACCATTGGCTATTGAAGAAC TTC  
TGAATCGTCTCGAACAAACCC CTTTTCTTTTCAGTAAGCTTATAGCTCAGCAACTAAAAGAAGAGCTTTC  
TCTTTGCGATGCA GAGT TCTCTCTGCTCTACAAAGCTTTGCTAAGAAACAAAAACCTCTATATTGTCC  
CGGGAATACATAACTAGTTCCCTAGCTTTAAATCC TTAGTAGGAGGGACTTCCTTGAACCTTATAGACAAA  
GCCTTTCTCCTGAAAAAACTTTCTTATTTGCATCC TTAGACATGGATGTTTTGCTTTCTATAGCAGATA  
AATCTGAGGTCATGCTCTTTAAAGCTGGCTCTGAAATCTTTTCGGAAGGGCAACCAAGTTTACGCCATA  
TGTAATAGCAGAA GAGTGTGTGAGAATTTTTGCAAAAAGAACCC ACTATTAATGTACGACTTAAACCTCTA  
GACTGCTTTGGGGAAGAAAGCTTTTCAATAATAAAGTTCCGGGAATATTCAGCAGAAAGCGATTACCC TAG  
TGAAAACGTTGATATTGAATAAAGGACAGTTTCTAAGCATTATCGAGGAATGTCC TCCGTTTCATTGGT  
TCTCTTAGAGTCTACTCAAAACAGATAGTCTTTTCGAGATCAATAAAAAAACCC ACAGTTACCTTTGGAT  
GGGAACGTGGGCC TAAACTC TTTGTTGCAGAGATTTTAGTTTTGATGCTCTTGGATGTATTTAATCACG  
TCACCGACTGTGCGGAGT TGCTCGGCATCATCTTCAGAAATTTCAAAGCAAATTTCTCTTCTAAAGTCA  
TAATCAACTCTGTCAAATCCAAGCTGTCTGCATTTAGATCTTCTATGAAAGAA GAGTCTACTTTGACATC  
CTCAGGACTTACTC CGAGCTGATCAACTATAATTGCCTTTACATCATCTTCTAAACTCATCC TATGATCC

TTACTTTCATTTCAAATGAAGCGCCTTCCATCTTAAGCAGACGGTCGACTTATGGCCATTTAAAATGGG  
CCATTGGGTTTCTCGCAGAGTCTATAGCAAAAAAATCTAGCTTTAAATAAAAATAAGTAACCAATCCC  
TACAAGTCTACTCTTTCGCACATTCATATGCGTAAAGGTTTATAGCATACTGAGCATCCGTCACAGCTACTA  
TATCTCGACTGTATATACAGCCAACGAAATGCCTTCTAAATCAAAAATCAGAGGGCTTAGGGCGAGAA  
GCATAAACCGCTCGCGAAGATAGAGAGGAAGTTACCATGAAAAAATTAATTTTCAAGATAACCTTTCC  
CCAATACTTAAGCCATACCTCCGTC AACCTCAAACCTTGCCTGTGATGTACGAAGATCCGTCAGAAG  
CTAAGAACAAGCGGCCTTAGCAATTTCTTTCAGGCATACCAATCTCCCAAAGGAATCTCTTTCAACCA  
CTCATTTTTCAAATTATCATTCAGCTCTTGGTCATATCAGTATCTATGAAACCAGGAGCAATACAATTG  
ACTCGTATATTCCTTACTTCCAACCTCTTTGGATAACGCTTTACTGAATCCAATAATTCAGCCTTAGCTG  
CTGCATAATTCGTCTGACCTGGGCTTCTCTAAGTCTTACAATAGAATAATTAATAATTGCCCCAGA  
TCTAGCTTTAATCATAGGTCTTATACTGCTGAGCAAACGTTGTATATAGAACCCTAAGTTGGTGTAAATC  
ACCGAAGACCATTCCTTTCAGACATTCGCATAAGAAGAGCATCACGCGTAATCCCGCATTTGTTAACTA  
TAAATCGATAGTGTATATCTCGAAAGAAAGTTCTGAACTTGTGCGGAAACCATATCATTCCTTGCTGAC  
ATCAACAAGAGCAAAAGGATACTTGTCTTCCAGTTTGTCTCAGAGAGAGTCTGAGCAGCCGCTGCCCGCT  
TCCCCATTAATCCAGATTTGGACATTAGCCCCCTGCTCAGCGAATAACTTCGCTATACTGAACCCCTA  
TGCCCTTAGAACCCGAGTCACAATTGCAGTCTTGTTTACCAATAAACACTCATTCACAACCTCGACAA  
AAATTTTCTATATCTTCCATAGACCTAAATGTTTACAAGGGAACTCAGTCTTATAGATCGGCTCAGCC  
CTGTGAGAACATTCCTTGGACCCAGCTCAAGGAATAAATCTACTTTAGGATCAATTTGAAAACAGTTTG  
GTACCATAACGTTGGAGAAGTCATTTGTCTGACCATTAAGAAGGATAGCCTCGCTCTCATACTAAC  
TCCCCTATTACATTAGAAGCAAAAAGTACATTA GAATCTTTAATTGCTAACTGGTACAGATAAGGAGCTA  
ATTCGTCTGAGCAGTTTGCATAAGCGGTGTATGAAAAGCTCCAGCAACCTTTAACATAACTACTTTTTT  
AGCCCCTAGTTCTCGAA GAATTACAGAAGCCTCTTCCACCTTATTTCTAATCCAGCAATTACGATCTGC  
TTGGGAGCATTGTAATTTGCCACCCAAATCCCTCTCTAAAGACTCCAAAGCAGGTAATACAACATCCG  
CAGTTAATCCATAAACTGCAGCCATTGCTCCCGAAGACTCTTCAAGCAGCATTCATCAGCTCCGCTCT  
CTTTTGTACGATGCGAAGCCGCTTCTAAGCTAATACGTTTTGATGCTGTTAAAGCAGTATATTCGCCT  
AAACTAAGGCCTGAACTAAATAGGCTCGAAAGGACAGTGTGTAGATAAAACTTCTAAAACAGCTAAAC  
TATGTAGATAAATGGCTAACTGACTATTCGATGTCTTTAATAGAATCTTTCAGTCTCTCGAACATAAT  
AGAAGATAAAGAAAACCTAGAAAATCATCAGCCTGAGAAAACAACCTTGCAGCTTCCGAGGATGTTTGA  
TAGAGATCTCTTCCCATGCTTACGAACTGGCTCCCTTGGCCAGGGAACAATAAGCCACACGATCCATCA  
CACAGTCTCCTCTGTTACACTTGTGTAAAATCACTGCTCCCCAAGATAAGCCTCCCCAAAAGCTACTA  
ACAACAACCGCTCCGCAACATGGATATCATGTGTACGTAAGAGTTCGTCTAAAGCAATCCACAGAAGA  
GGCTGCTGTGTTACCATACTTAGCAA GAGTTTTTAAATACCCGAGAGTCTTTAACAGCAAAAACGTTTTGCA  
ATAGCATCGATAATACGCTCATTGCTGATGAGGAACTAACCAATCTATATCTTTTTCTTGCAGCCAG  
CTTCTGTAATGCAAGTCTTGGCAGCAAATTCGTCTGCACTGCGTGTAAACACTTCTTTACCTTC  
CATAGTAATGAAATGTTGATGATTCGTGACGGTATCCGTGAGAAGCCGGACAACGACTACCTCTGCTGGC  
AACCGTAAAAGATCTCCTTGTTTTCCATCCGCTCTAAATTCATTTAGAGATTTCTAAAGCTCCTGGTC  
TAGAATGACCAACAATACATGCAGACCCATCCGAATAACACACAAGTATTACGATCCGTGATAGTT  
AACAAAGGAAGACAATTTGTGCGCCGCAATCACAAGCACACACTGATACATCCAGATTCGACATATGCC  
TTGGCTATGGACAATCCGTAAAGAAAACCTGTACACGCGGCAAGCAATCAAAGGCTGGAATTTCTTAA  
TTCCTCAAATAGGCTTGAGCTAAGGCAGCACTGGAAGGAAAATATAATCAGGCGCGGCAGTAGAAAATAC  
AATACAGTCCACTTGACTTTTAGAGATTTTAGCCGCTTCTATAGCCTTTTCTGCCGCTTAGCCCCATA  
AAAGACGAAAATCTCTCAGCAGAAGCTATTCACGCTCCTTGATTCAGTTCAGTTCAGTAAATCCATTCGT  
CAGAAGTTTCAACTATTTTTTCCAAATCAGCGTTTGTCAAAATTTCTTAGGCAAATACGAACCAGTTCC  
CCAGATCGAAGCTCTCACATCTTTTTTTCACACGCACCCGCAAAACAAAAGAAAAACCAAGTATACTGCT  
AGGGAGTTTTATACCTAACCTTTATTTTGCATCTATCCCTCATAATCGATTATCTAGGTGCTAGACCTAA  
ATAGGCTTAAAAGACATGTTAAAATATCCGTGATTACATTTGAAAATCTCATTTTAAAAAAGCTTC  
CAGGAATGGCTTTAAATCAGCAGAAAAAATAGCTTTTGAATTATTA GAATGGATCCATCTCAAATTGA  
GGCTATGGCTCTAGCATTACAAGAGTCTCTACTTCGCATGCAACTTGCTCAAACGTTTTTGTTTAAAA  
ATCTCTCAAACCTCCCTTGTAACTTTTGCAGTGAATCTCGAGATTCCTTCTCCTTATGTATCGTTGCAA  
CTCCTAAGGATGTTTTCGCTCTGGAGAAATCTAAGATCTTCAAAGGGCACTATTTGTTTTAGGAACTT  
ACTTTCTCCCATCACTGGAAAGCATTTGTCTTTGGAAAAATTAGCTATTCCTTAAGCAGCGAATGGAAGCT  
TGTTCCCTAAAGAAATGATCATAGCTCTTGGACGCACTTTGGAAAGGAGATGCAACTGCATTGTTTTTGA  
AACAA GAATTTTTCTTACCTTCCAATAAAAATCTCTAGATTAGCTCTTGGAATGCCTGTGCGTCTCTCCTT

TGATTTTGTGATGCTAATACTTTAGCTCGAGCTTTTTTCAGGAAGAAATTGCTTTTAAGC**ACCC**TCTCAA  
AAGCGAAACTGTTTTTCAAAAAAGACCTTTG**GAGT**ATATTTGAGGCGGTTTATCTAGTTTTTGTAGTG  
ACCAGC**ACCC**CTCT**GAGT**TCTCCCCGAACCTGCTAGAG**GGGT**TGCTTTTCGGCCTTTTTTTCGTTGTTT  
TCAAAGTTCTCTCTGTTCTCTTTTCTTCCATATATTGTAGGGCTAGTCAAATT**ATCC**TCG**ATTC**TCTATT  
GTAATT**GGAT**AGGTCTT**GAGT**AGTCTCTTCTAATATGTGGGACGCCTATGAGATTGGCTTCTGACCAA  
ATAA**GAAT**GGTGTCTTCCCAGAAA**GAGT**AAG**GAAT**AAAACCTT**ATCC**CTAGCGCAGACTTTTCTAGATAA  
AGGAAGTAATAATGCTTG**GAAT**ACGCAAAAAACG**ATTC**TGCA**ACTC**GCTGTTTTACTGTTGCTCACCTT  
TTCACAAAGTTCTTTCTGTTCAACTTCAGAAGGACGTATGGTCGTA**GAGT**CTATCACCATTACG**ACTC**AA  
GGAGA**GAATACTC**AAAATAAACGAGCT**ATTC**CTAAAATAAAAACAAAGCAAGGGACGTTGTTCTCTCAAG  
CAGATTTTGATGAAGATCTAAGAACACTTTTCGAAAAATTTTGATC**GAGT**AGAGCCATCGTA**GAGT**TTTCG  
TAATGGACAAGCTGTGATCTCTCTG**ATTC**TGACGGCAAACCTGTTATCAGAGAGATCAATATTTTCAGGA  
AATGAAGCT**ATCC**CC**ACTC**CATAAAA**ATTC**TGAAAACTTTAGAGCTTTATAAAAAATGATCTTTTTTGATCGGG  
**AAT**T**ATTC**TTTAAAAATTTTGATGCGCTAAGAA**ACTC**TTTATTTGAAACGAGGGTACTACG**ATTC**TCA**ACT**  
**CTCC**T**ATTC**TCATAATCATAATGAGAAAGAGGGCTTTATCGATATTTCCATCGAGATTAAGAAGGACGT  
CACGGTCGCATAAAAAAATTAACGATTTTCGG**GAAT**TACGCGAACAGAAGCATCAGACTTAGGTGACATTG  
TTTTAACTAAACAAT**ACTC**CACAACAACGAGCTGGTTCCTGCTGGTCCG**GAGT**GTATC**ATCC**GGACATGGT  
AGAGCAAGACTTATTTGCTATCACAAATTA**ACTC**CCAAAATAAA**GGAT**ATGCTGATGCTAAAGTAAGCAA  
GAGGTCCTACAGATGCTAAAGGAAACATTACTTTGCTTATCGTTGTAGACAAAAGACCTTTATACACAT  
TAGGTCACGTACATATAGAAG**GATTC**ACAGCGTT**ATCC**AAAAGACTGCTCGATAAAACAACATTTGGTTGG  
ACCTA**ACTC**CCTATATTTGCCAGATAAAATTTGGACTGGAGCACAAAAG**ATTC**GTAGCGCATAACGCTAGA  
TATGGCTACGTGAACACTAACGTTGATGTCTCTCTCAGCGC**ACCC****ACTC**TACCTGTTTACGATGTTA  
CCTATC**GAGTGAGT**GA**GGAT**CTCCCTACAAAATC**GGGT**TAATTAATAATCAAAGGGAAC**ACTC**ATACTAA  
GCATGATGTGATTTTGCATGAGACTAGTCTTTTCCCTGGAGACACTTTTGTAGATTAATAACTAGAAGAT  
ACAGAG**ACTC**GTTTACGCAACACCGCTACTTTAAAAGTGTAAGTGTCTATACGTTTCGTTCCCAATTAG  
**ATCC**TCTCG**ATTC**TAACGACCTTTATCGAGATGTTTTTATTGAAGTCAAAGAGACTGAAACAGGAAATCT  
TGGGCT**ATTC**TTA**GATTC**AGCTCCATTGACCATTTATTTGGAGGAGCAGAAATTCAGAAAGCAACTTT  
GATTTATTTGGAGCCC**GAAT**CTTCTCAAAAA**GATTC**AAATCTTTAAGAGGTGGTGGAGAAT**ACCT**CT  
TCCATAAAGCTAATTTAGGAGATAAGGTCACCGATTACACTGTTAAATGGACGAAACCACACTTCTTAAA  
T**ACCC**CTT**GGATTC**TT**GGAGT**GA**AT**TAGATAAATCAATTAATAAAGCTTTATCAAAGACT**ACTC**TGT**G**  
**GAT**ACCTATGGAGG**GAAT**ATCAGTACCACCTAC**ATTC**TTAACGATAAGTTAAAATAT**GGAT**GTATTACC  
GTGGTAGCCAAACAAGCTTAAGTTTGCACAAAAAACGTTCCAGCTCTAATAGACTTGGACCAGATTTAGA  
CAGTAATAAAG**GATTC**GTTTCCGCAGCGG**ACTC**AATGTTCTCTATG**ATTC**TATTGATA**ATCC**TAGAAAA  
CCTACTATGG**GAATCC**GCAGCTCCTTAAACCTT**GAAT**TATCTGGTTTAGCGGAACCTACCAATTTACTA  
AACTAACAGCTAGTGGTCTATCTATCGCTTATTAACATAAAAGGTTGTTTTGAAAGTCCGTGCAGAAGC  
TAAGTTTATCAAACCTTTTCGGAACAACAACCTGCACAAGGC**ATTC**CTGTCAGCGAACGGTCTTCTTAGGA  
GGTGAACCACTGTTTCGGGTTACAAACCTTTTATTATTGGACCGAAGTTTTCTCCTACTGAACCACAAG  
GAGGCTTGTCTTCCCTACTATTAACAGAA**GAAT**TTCAAT**ATCC**TTTGATTTCTCAACCTTGCATTAATGC  
CTTTGTATTTCTAG**ATTC**CG**ATTC**ATT**GGAT**AGAAGAGCACACT**ATTC**GCCTGAAAGACCTTTGCAGT  
AGCGCT**GGAT**TTGGTCTACGCTTTGATATGAT**GAAT**AATGTGCCAATTATGCTAGGCTG**GGGT**TGGCCGT  
TCCGCCAACAGAA**ATCC**TCAATAATGAAAAATGATGTATCTCAAAG**ATTC**TTCTTTGCCTTGGGAG**G**  
**AGT****ATTC**TAGAAT**CC**GAAAGGAGAAGGAGAGC**ATCC**TTCTCCTTTCACCTATTGGTATTTTTTATAGGAA  
AGAAT**TAT**GAAAAAGTTCTTATTACTTAGCTTAATGTCTTTGTCTCTACCTACATTTGCAGCTA**ATT**  
**CT**ACAGGCACAATTG**GAAT**CGTTAATTTACGTGCTGCCTAGAA**GAGT**CTGCTCTTGGGAAAAAA**GAAT**C  
TGCT**GAATTC**GAAAAGATGAAAAACCA**ATTC**CTAACAGCATGGGGAAGATGGAGGAAGAACTGTCTTCT  
ATCT**ATTC**CAAGCTCCAAGACGACGATTACATGGAAGGTCT**ATCC**GAGACCGCAGCTGCC**GAAT**TAAGAA  
AAAA**ATTC**GAAGATCTATCTGCA**GAAT**ACAACACAGCTCAAGGGCAGTATTACCAATATTAACCAAG  
TAATCTCAAGCGCATGCAAAAGATTATGGAAGAAGTAAAAAAGCTTCTGAAACTGTGCGT**ATTC**AAGAA  
GGCTTGTGATCCTTCTTAAACGAAGATATTGTCTTATCTATCGATAGTTTCGGCAGATAAAACCGATGCTG  
TTATTAAGTTCTTGATG**ATTC**TTTTCAAAATAATTAACATGCGAAGCTAGCCGAG**GAGT**GCCGTATGTC  
TCA**ATCC**ACTT**ATTC**CTTGAACAATTAGCTGATTTTTTGAAGT**GAGT**TTCAAGGAAATGGAGCT**ACT**  
**CT**TTCTTCCGG**GAGT**TGAAGAGATCGAGGAAGCAAAAAACGGCACACATC**ATTC**TTAGATAATGAAAAAT  
ATGCTAAACATTTAAAATCATCGGAAGCTGGCGCTATCATCATATCTCGAACACAGTTTTCAAAAAATATCG  
AGACTT**GAAT**AAAAACTTTCTTATCACTTCT**GAGT**CTCCTTCCCTAGTTTTTCAAAAGTGTTTA**GAATTA**

TTCATTACTCCTGTTGACTCAGGATTC CCAGGTATTCATCC GACAGCCGTTATCCATCC AACTGCGATTA  
TTGAAGATCATGTTTGTATTGAGCCCTATGCTGTAGTTTGTG CAGCATGCTCATGTTGGATCTGCTTGCCA  
TATTGGGTCGGGTAGCGTCATTGGAGCTTATTC AACCGTTGGACAAC ACTCTTATATCCATCC TC GAGTA  
GTTATTAGAGAAC GAGTCTCTATTGGGAAAC GAGT AATTATTC AACCGAGAGCTGTTATAGGCTCTTGTG  
GGTTCGGGTATGTTACTAGTGCTTTTGGACAGCACAAACATTTAAAACACCTCGGGAAAGTCATTATTGA  
AGACGACGTAGAGATCGGCGCAAATACA ACTATCGACAGAGGCCGTTTAAACACAGTGTTGTGCGTGAA  
GGTTCGAAAATTGATAATCTTGTGCAAATTGCCCATCAGGTGGAGGTCGGTCAACACAGCATGATTGTAG  
CTCAAGCTGGAAT TGCAGGTTCTACAAAGATTGGCAATCATGTAATTATCGGTGGACAAGCCGGCATAAC  
CGGACATATTTGCATTGCAGATCATGTCATTATGATGGCTCAGACTGGCGTCACTAAATCTATTACTTCT  
CCAGGGATCTATGGCGGAGCGCCTGCTCGTCCATATCAAGAAATTC ATCGCCAAGTAGCCAAAGTACGCA  
ACCTTCCACGACTC GAAGAACGTATCGCAGCACTTGAGAACTAGTCCAGAAATTAGAAGCTCTCTCAGA  
ACAACATTAATTTAATTGAGCTGTCTCTGATGTAATTTGGATATGCCTGCAAAAAGGCTTACAGAGAGCT  
CTTTTTTTTTCAGCAATAATACCTTAATAAGCTTTTTTCCGGATAATTTCCGGACACACTCTCCCTGTAGAGA  
CTAGATGCAATAAACGTTCTCGCTAAATTGAAATTCAGCTAACGACGAGAACGTGAAAACGCTCCTCCCC  
TTTTATGTAAGGTTTCTATAGCCATTTTCATCATCATGGAAAATATGGCTCCCAGAGAATCTTAAACAAGAT  
CTATCTATGTTTACTGACAAGGCTGCTATGGTCCCCATAAGATCATAGTTAACGGAAATAGGATTTAAAC  
CATCCCGTTCTT GAGTAGAAGAAT GAAACACCTCTCCTTGAACAATTTGTGATTTCTGAAGCCCTCGACA  
CAATTCGGAATACTGTTTGTATCTAAATCTAAAAATTTCTTATACATCAGAGCAATAGACACCTTTTCGT  
TCTTTAAGAAAAATGCCAACAGCTTCTCCAAGTTGAAAAAAATTTTCTTTCTCTTGAAAAGGTGCCGGAT  
TGATGTATGAACAATAGGCCTGCAGCGCATAGGAAACCGTTGTAGCTATCAATACGGGAACAGGTCCTTGC  
CTTATTCACCTGATATAAATATCTATCGAACGATTC AAAAGGTCCGGCAGAAAACAAAATACCGCCCAAC  
TCCTTTTCTCAAAAGCAAAGAAAACTTTAAGAAATCTTCCCATTCTAAATTC AAAGGAGGCGTATAGA  
AAAACAGTTGTGCTAACTGTTGTCTAAAAGACTTTAAGAGGAGAATAAATCACTAATATCTCGTAATTC  
TTCTTCGGAACAAGGAAAAGTTCCCGTATGCTTTAATGGTGCTGCCTGCACCGAGATTTTCGGGCTGTTGA  
GGACAAAACATTTGATTC TTTTCCGGATAGCTAAAAGTTTTTCTCTAATTTTAATTC TTTATCTTGCT  
CTCTTTCTTCCAAAGATTGTTTATTTTCTCCAGCGACTTCCGATAATCCGCCTACATTAGGAATCCCTCG  
AGGTA GGATACCAAAGAAA GAATTC ACTATGA ACTC CACACAAATAAAATTTTTGAGCGGATATTGTATT  
TTTTTATCTGTTAAAATGCAACAAAGGA ACTC TATAGAAAACCC CTTATAAGGCCTTCTGAACAAGGAA  
AATGAAATTTCAAACCTTCAAACCAACTTCATCTCTATCCATTTTCTGGGTAGTCCGAAAAGTTTTTT  
TTTGTAGCATAGACTTGGCGCCAGCAGTATATATATATTTGCGAAGGCCGGACCTTTCCGGTTACTTT  
TTCGCGCCGGCCTTGCATAGCCAGAGTGAAATTC AAAAGATTTATTTGAAAGACATTC TAGAATTTTTCA  
GGAACCC TTTATCC AAGAGAATCTATGCATCC TCTGACTCTCAACATAGCTTCTGAGGAACTACAGAAG  
CCC GAGTTTTTTCATGTTATTGAAAACCTTCGAAATGCTTTCTGCATTGACCTTTTGA AAAAATGCTACT  
CATTCGC GAATTTGAGATTC GCGGAGAAGAGGCCTATTTAGAAGGCCTTGTGGAGGATTTTATC ACTCT  
TATATCGGTCAAGAAGCTGTTGCTACAGCAGCTATTGCTTGCACAGGGAAGACCCTGGTTTTTTTCTCCT  
CTTATCGTTGTACAGGAGTAGCTCTGCTGCTGGATATCCCTTTACGACA ACTGGCAGCAGA ACTTCTAGG  
GAAAGAAACAGGGTGTGCTTTAGGACGAGGC GGATCTATGCATATGTGTGGTGATCGTCTTCTCGGAGGT  
TTTGGTATCGTTGGTGGACAAATTCCTCTGGCTGCAGGTGCAGCATTTTCTATGAAGTACCAAAA ACTCAT  
CTTCTATATCTATGTGTTTTATTGGAGATGGAGCTGTAGCTCAAGGAGTCTTTCATGAAACATTA AATTT  
TGTAGCGCTTCACTCCCTTCCCTTAATGCTCATTATGAAAACAATGGATGGAGTATGGGAACAGCCTTA  
CATAGAGCCATTGCTAAACAGCCTATAGCAGAATCC CAAGCGATTTCTTATGGTCTTTCTTCCGATCACTT  
TGAATGGATTCGATTTATTTAATTCGCTTATAGGATTTAGAGAAGCTTATCACCACATGCAACAAACAGG  
TTCTCCTATTATCGTAGAGGCGCTATGTTCTCGATTTAGAGGACACTCTATTTCCGATCC TAATTTATAT  
CGCTCTAAAGAGGAAATGCAATGTCTTCTCAAAGAGATCCATCC TTTTGGCAAAA GAATGGCTCATTC  
GTGC GAATGTCCATCC GAAGATGATTTTAAAGATTTGCGTCAAACAAGCAAAAACAGCTGTCTTAGAAGC  
AGTCGCTCAAGCTCGTCTTGATCCAGAACCAGCTGTAGCTACTTTAGAAGAGGGGGTCTATGCCTAATTT  
TGTTACACTCGAAAATCCGAGAGGCTATTAGACAAGCTATTGATGAAGAAATGACCAGAGATCC TAACGTC  
TGTATCC TAGGAGAGGAGGTCGCTGAATATAATGGTGCTTATAAAGTTACTAAAAACCTCTTAGATAAAT  
GGGGACCACTCGAGTATTGATACACCCATTAGCGAAGCTGCTTCTCTGGAATTGGAATCGGAGCAGC  
GCTAAC TGGACTTCGCCCAATTATGAATTTATGAGCTGGAACCTTCTCTCTAGTTGCTGCTGATCAAATC  
ATTTCTCATGCAGCAAAAATGTATTATATGACTGGAGGGAAATTTGCTGTGCTTATCGTTTTT TAGAGGCG  
CTAATGGAGCTGCTGCGCAAGTCTCTTGCCAACATTCCTCATTGTGTTGAAGCTCTTTATGCCAATATTC  
TGGCTTAATTGTCAATTGCTCCATCAACTCCAGCCGATGCAAAGGACTTCTTAAATCTGCTATTCGGGAT

AACAACCCCGTTCTATTCCTTAGAAAATGAATTAGACTACAATCTTAAGGGAGAGGTCCTTCAGAAGAAT  
ACCTGATCCCATTTGGGAAAGCTCGTATCGTTCAAGAAGGAAAAGATTTAACAATCATTTTCGCATAGCCG  
CATGGTTTCTATCGTTGAGCAAGCTGCTAAAACAGCAAAACAACGATGGGGACTCTCTATTGAAACCATT  
GACTTACGAACGATCAAACCTTTAGATGTTGCCACTCTCCTCACTTCTGTCAAAAAACAGGGAATTGTC  
TTGTCGTTGAAGAAGGGCATTATTTTTGTGGTATATCTGCGGAAGTGATTACGACGATTACAGAACATAT  
TTTTGACTACCTAGATCATCCCTCCTTACGAGTCTGTCAAAAAGAAACGCCTATGCCATATAATAAAACT  
CTAGAGATGGCGACTCTCCCAAATATTAACCGCATCCGGATGCCATTGAAAAAATTATGAGGTAACGTT  
GTGGTTTCTTTGTTAAAAATGCCTAAGCTCTCCCTACAATGGAAATAGGGATTTGTTAAATGGCACA  
AAAAAGCTGGGGATGAAATTCATTTCCGGGATGTATTACTAGAAATCTCTACTGATAAAGCTGTTTTAGA  
ACATACAGCTTCTGAAGATGGTTGGTTATTAGAAATTCCTGTTAAAGAAGGAACCAAACCTCTATTGGC  
ACTCTATCGCTGTATTTTCAACAGAACAAAATGCTCAATATGATTTAAAACAGCTCCTACCTTTGGAAG  
AAACTGTTGTTACAGATGCAGCTACAGAAGCATCGCCAAAAGACTCTGCTCAAACAGATTCCTCAATACAC  
AAGTGGCCCTTCCATAACTATGATGGATTCGTCGGAACCACCTTTAGCTACTCTCTAACTATTAAA  
CATTCACACGATCCAGTATTAGCTTCTCCTTTAGCAAAAAAATTGGCCAAAGAGCAAAATCTAGACCTCT  
CTGGAGTAACTGGTAGTGACCTGGAGGACGGATCATAAAGAAAAGATTTGGAAAAAGCTCCTCCTTTAAG  
AATGCTGGGTGGTTACCTGAAGCTCCAAATGTTAATCCGGATCTTATATAGAAGAACCCTTTTCC  
CCTGTTGAGAAGTCATATCTAAACGTCTGCAAGCTGCTAAAACCTTTATTCCTCACTTTTATGTAAGGC  
AGCGCATTTACGCTTCCCCCTTCTTGCAATTATTTAAAGAAGTTCAGAAACAAAATATTAAGCTCTCTAT  
CAATGATTGTATTGTACGAGCCTGTGCTTTAGCTCTGAAAAGAAATCCAGAAATTAATTCGGATTCAT  
AGTGTCGACAATAAGATTATTCGGTTTTCTACGATTGATATCTCTATTGCTGTAGCTATTCCTGATGGAG  
TTATCACTCTCTATTGTCCGCTGTGCTGATAGAAAAAATATTGGTATGATCTCTGCAGAAATCAAAGGACT  
TGCAACTAAAGCCAAACAGCAGTCTCTTGCAAGAAAGAAATACAAAGGAGGTTCTTTCTGTGTATCTAAT  
CTTGGTATGACAGGGATCTCTGATTTCACTGCTATTTTGAATCCCTCACAAGCTGCTATTCCTAGCTGTAG  
GAAGCGTAGAGGAACAACCTGTAGCTTTAAATGGAGAGCTAGCTGTAGGCTCGACCTGTATGTTGACATT  
GTCGGTAGACCACAGAGTGATTGATGGATATCCGTCAGCCATGTTTCATGAAACGACTGCAGAGACTCTC  
GAAGCTCCTTCTGTTTTACTTCTCAATTAAGAAGGGAATGTTTCCCTTCTTTCTTCTAAGAAGTTGGTC  
GGGAAACATTCCAAATATTCGATGCATACTCAGCGATTGATCTATCGCTTGAAAAGAACCCTATCCCCC  
TACATTGTAAATAGACTTCTTCGTCCACTCTCAGGTTGCTTGAATGAGCTTGCAACACGGTTCTGTGTA  
TTTTATATAGGCTTCCAAATCTGCAAGAACAAGAAATGGATCTCCCTCATTTAAAAGTTCGGTTTACAATAG  
GTTTAAATAAGTCTTATCTTCTTGAGAAAACCTGGCTTGCGCAATCATATCAAGAATTTCTTGAATGTT  
TGGATTTGCGTTACAGATGCCTTGAGGATAGTATTCCTTTGCGTAGCTCAGAGATTTCTCTCTAGAAGA  
CCAAAATGAACATATGCTCTTTCCGATATGTTTCAGCCATTTTCGATATTGGCACCATCCATAGTGCCAA  
TTGTCAAGGCTCCGTTCAAAGCAAACCTCATATTCCTGTCCAGAAGCCTCCATTCGGCTGTGAAAT  
TTGCTCAGATAAATCGGTTGCAGGAATGATAGCTTCTGCTAAAGAACTCTGTAATTTGGCCAAAAGATG  
ACTTTTAGCTGATCGTTCACTTTAGGATCATTATTAACAACAGCTGCTACATTATTAATCAATTTTATGA  
TCAGCTTGGCCATAGCATAGCCAGGAGCCGCTTTACCTCCAAAATGACCCTTGTGCGGAACAATCTCTCC  
AGATCCATTACGGATTTTATTATAAAAAATAAATCACGCGGAGAATATTCATAAGTTGACGTTTATACTCA  
TGTATCCGCTTAATATGGCAATCAAAAATGGACTGAGGATTTACAGTGACCCCAAGTTCTTTATAAATTC  
GAGCTGCTAGTTCTCTTTATTCGGATTTTAATATTACGCCACTCTTCCCTGAACCCACTATCTTCAGC  
TAAAGGAATTACCTTATGTAGATGCGTGAGATTCGTTAAATATTCGTGCCTATCGTTCCGGTTCAATAAC  
GAACTTAACTTTTTATTGGAAAGAGCCAACCAACGCTAGGTGTAATCCCATTAGTGACATTGATAAATT  
TATCCGGGAAAACTCAACAAAATCCCTTAAATAAGTACTTTTTATAAGTTGC GAATGAAAAGTGGATAC  
TCATTACCTTATTCGTTCCAACAACCTGCTAGATTTGCCATATTTACAAATTTAGAACTTCTTCTCCTCG  
ATAATAGAAAGAGCTCGACGCTTATCATTATCTCCAGGATATTTCTGCGATACTTTTGCTAGCCAACGTC  
CATTAAATTCATAAATAAATTTCTAAATGACGAGGAAGAACCTTAGAAAATAAATCTAAAGACCATCTCTC  
TAATGCTTCAGGAAAGATCGTATGATTAGTATAATTGAATATTTTTGTGGTTGCATCCAGGCAACATCC  
CAATCCAGCTCTTCACGATCAACTAATAAACGCATCATTTCTGCAATGCCTAAAGCTGGATGCGTATCAT  
TCAGCTGAACTGAGACTTTTTTACAGACAATTTATCTAGAGATAAATGTGTTTTAGTATAACGACGCAAGAT  
ATCTTGTATCGTAGCAGATAAAGGAAATACTCTTGCTTACAGACGTAACTCTTGTCCTTACAGAAATAGAA  
TCATTGGGATAAAGTACGCAGTGATATTTCTGCTAGAGCTATATCTTCGATAGCTCGAATGTAATTC  
CGTGGTTAAAAATAACTAAATTCAAATCCATGACGCGATTGTGCTTGCACAAGCGTAAAGAATTCACTGT  
ATCATTATTGAAACCTGGAACAGGAACATCATAAGCCATAGCTAAAACCTTCCGGGAATCCACTAATCT  
GCAACATCCCTACCTTTGAGTCGATGCTATGCTTTACCTTCCATAAAAAATGTACGGGATATAAGTATT

CTCCTCGACAAATCTCCCAAGGATTTCCATAACGCAACCATTCATCGGGGACTCGACTTGAAAACCATT  
CTCTATCTTCTGATCGAAAATACCGTAATCGTAACGAAGGCCATACCCATAAGCTGGAATCTCTAGTGTT  
GCCATAGAATCAAGAAAACATGCCGCAAGTCGACCTAATCCCCCATTACCGAGACCCGCATCATGTTCCA  
TTTCTACCAGTTGATCGAAATCGTAGCCCAAATCAAAGAGGGCTTCTTTCACTAAATCTAGAAGACCTAA  
GTTCAAAGATTACTTTTTAAACTCTCCCTAGCAAAAATTCATGGATATGTAGTACACTCGTTTTACA  
TCGTTATCATAATAACTGCTTTGTGTCTTTAACCACCCTTTAGCCATCCATTCAAAACAGTTTTAGCAA  
CGGCTATAAAAATATCTCTGGTTGATGCCGATTGAGGAGTCTGGACTACCCACAATATACCCTTTCGAG  
GATAGCTTGCTTCATAGATTC AACATGATCTTTGTCCGATCGAAATACATAGAGGCTTCTCATGTAAAG  
AGTTTTGTTTGCTTGTGAATAAGAAATATTAATATTAAGAAAGATTTCTATTC TCAACAGACGATACTG  
CAGAGGGTCTTGATATTCGGTAAAAAATCAAGTAAAATGTTTCGCCTTTTTTTAGTTAAGGAGGCTTTATGG  
GTATCAAACCTCATGATTATGGCTGTTGGGGAAGTAGAGGGAACGTCTTTACCTTACAAGATCTGAATAC  
GCAGCAAGCAAATCAGAGCGCCGCTGCTTCTTCTCCTCTGTTCTAAAGTCGGAATGTGCAGCAAAAGTT  
GCTCGCTATGACTAGGATTCCTCTTTGGACTAGGATTTATCCTTTCTATTGTTACATTTATTGCGGCAG  
CTGCAACTCTGCCTCTCGGAACACAACGATTC TTATTATGGTTACCCAAATAGCTTTTTGCAGCCGCTCT  
CGCCTTTAAACTTTATGACCTATTC AAGCACGACGTGCCTACTTGTTCGATTACTTCAAAGGCGTAGTAT  
AATTC CCGAACGGTGTACAAGGAGGCGGCGCAATTGCCTGCCTCCTACCTCTAGCTTCTATAAAAATCTA  
AACTTTGATAAGCTGATGAAAGTCGCTTTGTAAATTC TTGTATCGCACAAGAAACATCGCACTCTCTATC  
ATCTTCTTCTAGTTTTTTGCGAGATAGCTCGAATGGAAGAAATCACTGTAGAGTGGTCTCGAGAGAACACT  
TCCCCAATTTTTTACATATGACAAAAGAAAGCTTCTGTCTACACAAAACATGGCGACCTGCCTAGGTAAAA  
CATATTC TCTGGACTGAGAACGACCTAGAACACTTTCGGGAGAAACGCCATAATATTGAGCTGTAGCAG  
AACAAATACCGGATGAGTTAAACGAATACTCTCGGCAGCCTGCAATACATCATGTAATAAAGCCTCTATG  
TCTCCTTGATAAAGCATTTGATGTGAAAGCTTTTTATAAGCAACTCGCTTAGCTAAAGTTGTTAATGCGT  
GTAACAAAGACTTCACATGGATGATAGAGCCTGAAT TAGAAAATCTAAAGCAGTCTCCTCTATACGAAT  
ATTCAGTTTTTCTATTC TTCTTTCTAAAAAATTTTTTAATCC TTCTTTGTTAAAGGACTAACGGGAATC  
GAAATCC CCCACTCAAAGCGACTAATTAATCGTTCTTCCATAGCCTTTAAATCTCCTGGAGCAAAGGTAG  
AAGAAATCACGATCAACTTGCCTTCTGTATGCAACGAATGAATGTGTGGAAGA ACTCTTCTT GAGTAGC  
TCCTTTACCTGAGAGCACTTCTATGTCTTCAATGAACAGAGCTTCTACATTACGATAAAACGCTCGGAAA  
CGCTGCATCTCACCAGAACGAATAGCTGACACCAGGTGTTCCGTAAATAGCTCTGATGTAACATACAGAG  
TTTTTACACCAGCTTCACGAAGTCTCCACAGCAGCCTGCATCAGATGTGTTTTTCCGGAGCTTTCAGG  
ACCAAACAGATAAATA GGGTTAAAAGGAAAACCTTTGCCTTGTTCAGAAACCTTAGCAAATTC TTGAAGA  
ATTC TTACAGGTAGATC ATTC TCCG GAGT CACAAGAAAATTAGCAAAGACATGTTCCGGATCAATGTCCC  
CATACTCATAGTGAAGTATGCAGTCTTTTCTTGCTGGATCTGAGTATCC TTAACGGTGTAGATTTATC  
TAGGGAAGTCACGCGCACGCGAAT TGGCTTCCCATTTATTTAATAAATAAAGTAACTAGCTTTAACTTTATGACGA  
ATATGCTCTTCGAACCAAGTTACTTGAAAAGAATCTTTTCGCTTCCAATATAAGTTGCACGCATCAAAGC  
ATAGGACCTTCAAGGACCTCAGCCATTTATTGACGGTATCCACTC CAATTTCTTTTCTTGAAGCAAAAG  
GA ACTCTTCCCAAGCTCGCATAAAACTATCTCAGCTAAATAGTTTTGATAAAAATATTC TAATTAAAAA  
CAGTACTACTTACCTTTTCGGTATTC TCTATCTCTTCTATTGATAATTACTTTCATGCTGCAGATGTTGT  
TCATCTAAAATTTTGTGTTGTTACCCATTGTTGGATAACTCTAGTAACATAGAAGAGAACCAGTAAATAT  
TTAACCCAGAAGGGAAATTATAAAACATGAAAGTAAATAACAACGCCATCATTGTTCCCATAGCTTCTTG  
CTGACGTTGTTGATCTGACGCAGGACCAGATCGTTTACAGCAGAAATTTTCTGCTGAGCAAACATGACT  
ACACCTAGCAAAATAGGAAGAAGATGGA ACTCTTTCCCGATAAACCATATAGGTGTTTTCCCAAGAAAAGA  
GAACATCAGGAGCTGTCAAGTTATCTATCCATCCAGGGATAAAGCTAGCTCCCCTTAATAGAAAACGATGA  
CTTCAATAAATCGAACATCGCTATCAAAAATGGAATTTGTATAAGCAAAGGAAGACAACCCGTTATCGGA  
TTAACTTTATTCATCTTATACAAAGCCATAATTTCCATTTGAGCTCGCTTAGGCTCACGCTTATATTTCT  
GCTGAATCTCCTGAATATAAGGAGAAAGCTTTTGCATACGACGCATAGACC GGATAGACCAAGCATTC AA  
AGGATAGAGTAAAAGCTTCAGTACGATCGTTAATAAGATAATAGAAATTC CCCAAGAGCCTGTGAGGAAT  
TTAAAGAATTTCAATATGACAAATAAATGCTGCAAAGGCTCAGTTATAAAACTAAAGA ACCCTCTGA  
AAGCAATCGCATCAATAT ACTCAG GAGT TTCTCCTTTA GAATTC GCGTTAGCTCTATCTAAAGTTTTTAA  
AGTAGGGT CGGCTAGAGGCCCTGCATATACCATAAATGATAACGCCAGCTTCCTTAGGCAAAGGTAGC  
ATTGCCGTATAGCCA GGATATTTCGAAGCAGGAT AAGCTTGATCTTTCGGAGGAAGTTGAGAAAAGCCGTG  
TAGGAACTACATTC CCTGGAATAAAAGAAGAAGCATAGCCCGCTG GAATAG GAGT TCGAGGGGT TAGAAT  
TACCCCAAAGTACCCATTAGAATTC AAAATCCATTGAG GAGT TGCGTTGTTCCGTACCAGCAAA GAATCC  
TTAGCTTTAGGTAATTTACATTAAGAGATC ACTCTTATTTTTCTTACAGCGTGATACTTCACAGCTG



GAACAAAAGCGTTGGACATAATCTCAACTTCTGGAACGCCAGATGTGATCCACAAATCTTCTCGTCCTTG  
AGTAGTTTGAATCTCTAACTCAAAGGCGTAAGGCTGCTCTCCAGCGAGTAGGTTTTCTAATTCACCA  
TCCCGCTCTCTAAAATTAAGTTTTATTATCGAATGAAACAACACGAAAGCCGGTAGCAACAGGAGAAG  
CCAATTCCTTCTGAAACAATATTTAAAGCTTGATATTGTGCAGGCCTCTTTTTAACATCAGATAG  
CGTTCACGTCTGAGTAAAGGATTAATAGCCTCCACAACATTTGCTATGTTTTGACGTTGAGAATCGATA  
GTTTCGACTCCGGGAAAGAGGCTTCTGAAGGAGAGTTAATTGCTAACTCTCTATCAAACCAATCTCAT  
TAACAATACTTTTTATTCCTTCTTGATCAGAAGCAAAAGGAAGATTAATTCCTCGATAGCTCCACTTTC  
TTGAGAACTACAATTTGCATGTATTCATTGGAGAGCATGTAGTAGCTACCAGATGCTGTAGGATTTTCT  
TTATCAGCAAAGACTACAGCCCGTGCCATAGGGAGATCTAAAGACTCAACACACTCTTCTTGAATAT  
AAATACCTAAAGGTACAAATTCATTCCTGGTATTGAGAAAACTAATGATGTGCCGTAGATAGCGCCCGC  
TTTTATTCGCAATCTTCCCATCCCTTATATTCCTCCTAGGAAAACAAGAGGCTCCTGATTGCTACGAAATTC  
GCTACTAAAACCGGAAAGCATCTCTTTGATTAGGGAGATATACAGAACTTCTTTCGACAAAACCTTCT  
GCCAGTTTCTCCATAGAGGGAAAACAAGGATCCCTCCAAAAGTACTGGTCTGTCTATCAGACTCAAGA  
AGTTCTCTGGAATAGACTTCAGGATGAGATCCCTTTTGTGTCAGCAGCAATAAACGATTCCTCCAAACGA  
ATAGCATACTGATTGACTGATTCGCTCTCCTCAAGAGAAGCTGTCCAAGGTACTACTCAATTGCTCTG  
TTGAAGCTAATATTTGCTCAGAAATAGCTCGCTGCTTTTCTGCAAGATCCTGGCATGACTTCAAGTCTCG  
ATAACCGAAGAAAATTTGGCAGCCCAAAAATGCCGCGCTTACCAAGGAAACAAATAATAACGTTCTGTTA  
TTCATTCCTATCCGAGGTGGGTCTCCCTATGGGGAGGGAAGCCTCGTTCCTATCAAGGTTGCTTTAATT  
CCCTAATCAAAAAAATTTGCGAGAAAGACAAAACCTCTCCAATTCCTGTCGAGAATCGTCTTTTGTCTTAC  
AAGAGATTCAACTCTGCTCTTCCGAACGGAGCTTCATACTATGTAACCTGGCGTCATTTTTATAGAGGGT  
TCTTTTCCATGCACTTGGAAAATAACCATCCCTCTCTACATCAAAAAGTTAATGTAGAGTCTGTTTT  
CAGATGTGGACGCTAGCAATATATATTCAAAGACTTTGCATCATTTTTTTTTACTAGCAATCCAAATGAT  
TCCAACCTCTAGAAAAACCATCGGAATAGACAACCATTGCCCAATGTTAATATGTTTTCTTCGCCAAGC  
CATGCTCCTTGGTGTGTTTTGAAAAATTCAGCGCAAAAACGAATTACTGCTACCCCAATTAAGCGCCTG  
CTGCACATAGCCAGAACCCAAACGAATAACACCAGATAGCAAAGCCTGCACAGAATACAAGAAAGCAC  
TAAATAACCAAGGCCCTTCGTAAGCTGAACAGGATGTCTAGGGATTTGGCCTCCACCATTCGAAAAATC  
ACTCCCAAGGCATGGATGTAGGGTCTCCTAGAATTTCTGATTCATAAAGTTCCCACGCGAATCAGCA  
AAGCTGCACAACCAAACACTGCTCCACAAGATCGCAAATGTAGGTTACTGAAAGCATAGGCAACTTACG  
AATATGAAGTCGCGAAAATACAGCTGCCCAATCACCACAGAGATCACAGCTCCATGACTAGAAAGCCCT  
CCTTCCATATTTTTATAATCTCAGAAGGATTTTCAAATAAAAACTCCCTCCATAGAAAAGAAGGTAAG  
CAAGCCTAGCTCCAATGATGATAGCTAAAAGAGCTCCTAAAGCAAAAATTTCCAGACTTGTTCGAGTTC  
TTTTTCTCCTCCTGTCTTTACACAATGCTGTGTCAGCTTGATGCCGAAAAAGATGATAAAAAAATT  
CTAGAGAAAATAAGATTCCTGACCACGATAAATGAAGCCCACTCGCGGAAAGATAAGAGAGTCTTAG  
ACTGGTCCCAATGTATCACGTTTTTATCACCTCTCTCAAAAAGAAAACTTTTCTAAATAAAAAAGACTA  
TGCCAAAATTTTTGCTAGCAATCTTGCAAAAAGATCTTCGCACGGTTTTCTCTCTCGTCAGCTATAT  
TAGTTGCTTTTTGAAAATACTCATGCTAGAGTCTCCTTAATACATAAGTTCCCTCAGGTCTTTTGGC  
GCTTACAAAGAGTGTGCTAGGGACATAAAATCGAATCAATTTTTTCACTGAGTTGCGTTATGCGAAAATT  
CTGGTACTTGCTCTTTCGGCCTTTTGTCTTAACTACGACTACTCTTTCTAGCTGTGCTGTATCTAAT  
TCTGGCAGCTACAATGCTAGACTATACACTAAAGGGAGCAAGGCTAAAGGAGTCGTCGCCATGCTACCTG  
TTTTTTATCGAACAGAAAAGTCTGCAGAATACTCCCTGGAATTTACAAGCAGAGTTCCTCGAAGAGAT  
TAGCAGACGTTTGCCTCTGATAAACTACTTTAATCAAACACCAGCTTCAGCTGGTGTGCTGCA  
CAATTTTTTTCTCCTACTCCTAATATTTGCCCCGAATTAGCGACTCAGCTGTTGCCGGAATTCGTAG  
TTGGCGCAGAAATTTAGAACAGAAAACAACGGAAGATGTTTTAAACCTTCTATTTTACGATCTGTTTCG  
TGTGCGAGTGTGTTGATATTCGTCAACAATAAGTCTCTATGATATACCAAGAGATTTTAGACGCGAGTCAA  
TCTCTCGCCTCTGGAAGCAACGATATCATCGTTATGGCTGGCGTTGAAAAACTTCGATTCGACTCCGA  
TGGGCTCATGCATCAGAGATTATTTAGAGAGATGTTGCTCGCGTAGAGGGATATGCTGCGCAAACCTA  
CTCTTGATATATGGTGGTCTAGGACTTCTATTAGTTTTTGTGGAATTTCAATTTTCTTTCGGAACGG  
TTTTTTGTATGGCCAAAGCCTGAAAAACATACCCATTTACCATTCAGCTTAGTGTGCTTGGGGGCAGTGT  
TATTGCTTTTACCGGCTCTGCTCCCCACCGGAGATCCCTTTTCTCTATTTCTAAAGCCTCTTTTACGG  
CATCTTTGTCTTTAGTGCCTTTCTTTTTTTACTATFGGATTACCGGCTCCTATCACCCAAATCTATTTG  
TATGCAGGAAGAACAAC TAGCTCAACTTCATGGTTACTTGCCATAAGAGCTGGTGTGCTGCATGTGGGT  
TTACCATTACCGCTACACAATACTTGCACGATTATTACAGCTTGTCTGCCACTCATTTTTGCCCAACA  
ACTTTTTCAAGAGCAGGTGATTACGGAAGAAATTCGAGAACAGCTATCAACTAGACCGGACCTTCTCTAT

ATTTTCTGTATAGCTATGCTG**ATTC**CTATTGCTGAAGAAATCTTTTTTAGAG**GAATTC**TCCAAACTTTCT  
TCAAAAATACATTTTCTAGAAGTAAAGCTGTTGTAACAAGTTCATTGATCTTTGCTATCACGCACATAGA  
AGCTTCTTTAGGTAGCTTCATCTTTGTGCCAACTTTGTTTGTCTTTTCTTTATGCGCTGGCTTTATTTAC  
GAGAAGGTACGGCATATCGCCGCTCCTGTG**ACCC**TGCAT**ATCC**TGTTCAATAGTTGCCAACTAGCGTTAC  
TGTCTTATAAAAAAAGAG**GGAT**GTGACAAAA**GGAT**AGATAGA**GAAT**AAAAAGTAAGCCAGAGAAAA  
**CTC**CTAGCACAAAAGGCCT**ATCC**TTAGGGCTGTACTTCCG**ATCC**TG**ACCC**GGTTCAGAAGTCTCTCAT  
CTTAAGAGGTCCCCAGCTCACG**GGAT**CTTTGGTACCATAAATACAGTTTTCTCTCAAGTCTCTTCCCTA  
**AATCC**TTATTAAGAAATTTTTTCTTGCTGTTTTATACGAGCCAGT**ATTC**TTTCAGCCTGTTCTAAAGAA  
TTTTGATTATGA**GGAT**CAAAAACATGAGGAGATCGACGACGCAACTTAGCCAAGGCTTCTACAAATACTTC  
TTCAGCTTTAAGCTTTCCTTCTCTTTCTAGCAAGAAGCACAAGGTTAATACTAAAGTAAGTACGTCCTCG  
GCTTCCGAAGCGATTTCCAACGAAGCTTTATTTTCTTGACAGCATCAGCCAA**ACTC**CTGAC**ACTC**CCCTG  
CTATATACTGCAACATAG**ACTC**CAC**ACTC**TGTAAATTAGTCCAAGGACAA**ACTC**CTGTAAAGCCATTGC  
TCGCGAAATTTCAACCAATTGTAAGATGCCTTTTTTCTTCCATA**ATTC**ATA**ACTC**CTTCAAAAAAT**GGGT**  
GTGCAA**GAGT**TAATAAAAAA**ACTATGAAAACCC**TCTCTCAAGCGGAAA**ATCC**TAAGCTACAGTTGAGGAA  
**CCC**GTAGCCGAAGAGAAAAAGT**GAATTC**TTCTAGTATTTTTTATACATAATGA**GAATAATCCGGGT**CCG  
CTCACAA**ATCC**AAATC**GAAT**GTTTTCTT**CAGCAATTGTTATTC**TAAGTGAATTTTTGTCTTGTGCTC  
**GGGT**TTGTTTTCTTTATCGCATATAGCTTT**ATTC**TCGCTCCCTTCTTCCCTTATTGCTCATTACAGT**CAC**  
**TC**AAAAATAGGCAGCTCCGACAAATGCCAATCTTATGGCCT**ACCC**CAATCATTGCTCATA**ACCC**TAG  
TCTTCTTCGACATAG**GGAT**TAATATTG**GAGT**GCAAAACTGCATAGCAACCTTAGTAGGG**ATTC**GGCATC  
TCTATTGCTTACCGTAG**GAGT**TCCCTCGCTTTGACACTAGTTTTGGGAGAAATGTCCCTAAGGTTATC  
GCA**ATCC**CTTACAATGCAC**GAAT**TGCAAAGATTGTA**ACCC**CAATCATCTTTGCCTCAACTAAAAGCTTCC  
GCCCTATATTTGATTGGGCTATCTC**GGGT**ATCAATTTTATCGTTCAGAAAATGTTGGCCCGTCAAGAAAG  
TGATTTT**ATTC****ACCC**CA**GAAT**TAAAAGAAGTCCCTCCGAAGCTGTAAAGATTT**CGGAGT**TGTAATCAT  
GAGGAAAGTCGTCTTCTATTTGGCTATCT**ATCC**ATGGAAGAAGGTAGCATTAAAGAACGCATGACGCCCA  
AACAAGAAATCATTTTTTATGATGTCCTT**ACTC**CGATTGAAAATTTATATA**ACTC**TTCTCTGGACCTAA  
ACAAAGCT**ATTC**CAAAGTCTAGTTTGTAAAGGTGGTCTACAAAATCTCTTAG**GAGT**TTGTTCTGCAAAA  
TTGCTTCTTCTCTACAAAGAAAAATTACAATCTGCCGAAG**ACTC**TTGCCTCTCCTTTCGTA AACCTCACT  
AC**ATTC**CTGAAACAGTATCAGCTAAGACAGCTTTGTATCATCTAGCAGGAGAAGACTGTGGTTTAGGTAT  
TATCATTTGAT**GAAT**AT**GGGT**CTATAGAA**GGAT**TGATT**ACCC**AAAATGATCTATTTAAAATAGTCTCTGAT  
GAGGTAGCTCATAATCGCCATCTTTTAAACA**ATTC**GCT**ACTC**AGACA**GAAT**GTTGTTATTGCTGCAG  
GCACCTATGAGCTTCTGATTTCTATGACCTGTTT**GAGT**TGATCTTCTACTACAGCTAATTGCGTTAC  
CATAGGC**GGAT**GGCTGACAGAACAATTAGGAGAA**ATCC**CTGAAACAGGAACAAA**ATTC**GCTTGGGGACAA  
TTTGT**ATTC**CAAATACTAGACGCGCTCCTAATTGTGTGAAAC**GGGT**GTATATAAGGAAA**ACCC**ATGGAA  
ACTA**ACTC**TCCCTTTTCTGGTTAG**GAGT**GAACCTCCTTTGTATTTTTGTCCAA**GGGT**TCTTTTCCATGA  
TGAAATGGCTTGCAT**ATTC**AATCGCGTGCAGTTGCAATACTACCTTACGAAAAGCAATAAAAAAGC  
CTCTTACATTA**ACTC**CTTATTAGAAGACCTTATCGCTTATTTGGAACCGTAATGTTGG**GAGT**AAATATT  
GCTTTGCAATA**GGGT**CT**GAGT**CATCACGAACCTGTTACAA**ACTC**CTAG**GGAT**TTCTCCT**GAAT**ATGCTC  
CTGCAACGCAAATTTATTTAGTCGTCATTTTTGCT**GAAT**TA**ATTC**CTTTAGCTATCTCTCGTAA**ATTC**  
AGAAAAATCGCCTTAAAAGGAGCCCCT**ATCC**TCTATTT**CGTCACTATCTTTTCTATCCGCTCATCCAA**  
TGTGTCGGTGGCATTACCAATATGATCTACTTT**ATTC****GAAT**ATTAAGGAAGAGAC**ATCCACTC**AACGC  
TTAGCCGAGAT**GAAT**TGCAAAAGACATTAGAA**ACTC**ATCATGAAGAGCATGATTTCAATGTGATAGCTAC  
AAATATTTTCTCTTAAAGCGAACTTCTGTAGAGCAAGTATGTCAATATTTGGACCA**ATCC**CTATACTT  
TCAGCTACCGCTTCCGTACGAGATGTTTGCCAGCTCGTTCGTCGCCATCGTTTAGATTTTGTCCCTGTTT  
ACCATAAAGTTAAAA**GAAT**GTAGTGG**GAAT**AGCTTTTCCAAAAACCTCATTAA**TC**CGAA**ATCC**CAGTGA  
**CCC**TGTTGTCCCTTACCTAAGCTCTCCCTGGTTCATAACAGCCAAATCTAAGCTC**ATTC**ATGCG**ATCCAA**  
**GAATTC**CGCAA**GAAT**AGTTCTAAAATCGCCATTGTTTAAATAATAATGGCGAGCCTATGG**GAGT**TTTAG  
GCTTACATACGGTGTTTAAAACGTT**ATTC**AA**CAAGAAATATCACCC**AAATTA**AAACCCAA**CACTTC  
TTTAAATGAACGAACCTTCTCTGGGAACACACCTTTGTCTGAAATAGAAAATGAGCTCGATATTTTTTT  
AT**GGAT**AATGATTGTACAACAATTGAGCA**ACTC**ATGTTAAA**ACTTCTGGATACTC**CTCCAGAAGTAGGCG  
CCTCTATCATTATCAACGACCTACTGTTAGAGGTAAGAGATTTCCCTTGTACGGCATCAAACTGTTGC  
TATCAAAGAC**ACTC**TGTAACGATTACGCGTACTGCTGTAAGTGTTTTACAACGC**GAAT****ATCC**TCTGTGC  
TGCTGTAA**GAAT**TTCTTCTTCTGAAAGTAAATAACTAAAAGAAAA**TCGTAGAGT**AGCTACTGCAAGATCT  
TGAGGCACCTTTCATTACTGTTAATGACTTAAA**ACTG**TAGTTGCTCCAGAAGAACACGCAGAGCCATAAC

CACAAGCCACCCCTTCTAGATCTAAAGCGATTTGCATCACTTCTCCCTCTAAACCAGGGAAAGCTATTGC  
AGAAAGATTGCTAACTCGAGGCTTGTCTTGACAATGCACGATACATTCAGGGAAAGCTTCTTGATACGC  
GACTCAAATAGATCCCTATAAGAACGCATAGTTGAGCTATGGCAGGCTGCTCGACTAATAACTTGCTAA  
AAATATAACGCAGGGAAGCAATACCATGAATATGCTCCGTTCCCGAACGAATACCTCCTTGTTGTCCTCC  
TCCAGAAATTATTGGAGATATTTTGATTTTTGGAGATGTAAGAAGGACTCCGATTCGGAAAGAGCGTGA  
AACTTGTGTCCAGAAAAAGCAACCATTGAAACTCCTCTGGAATGTGAATAACTTCTTTTCTACAATAG  
CCGTGGCATCCACTATCAAAGTAGTTGGCGTCTTTAGCAAATTCGGCTATAGCTTCAAGATCAATTC  
TACACCAACCTCACTATTCACCCATCCCAAACGATGGCTGAGGTATCTGATTGAACAGCTTCTTTAATT  
TGTTCTAAAGAAACAACGCCTCAGGAATAGGGTCCAAGTAAGTCACGGAAAGCTTTGCTTGCTTTA  
AAGGTTGATCACTGCTGGATGTTCCATGCTGGAAGTAATAACATGGCTTCCGTAGGAATATTTTGAAT  
TGCCAGGTTAAGACTTTCTGTTGCTCCAGAAGTATAAATCACCCGACAATGACTAAACCCAGAGCTTTT  
TCTATAAGAGTTGAAGTTTCTTTAACCAATTTTTTGGTTTTCTTTCCAAAAGTGAACGCTAGAAAGGAT  
TCCCGAACCCACCTTCGCCTATGAAAAGAATGTAACACATCAAGACGCCAGGCTCTAAAAGAGCTGA  
AGCGTTCGTATCTAAGTATATAGTCATAAAAATTAACGCATCCGAACCAGTATAACAGTAGCATTATCTC  
TACCGCCCCGACTGTTTGCTAAGGAAATAAGGATATTCACACCTTCTTCCAGAGTAGTCGTCTGCGTTAA  
TATATCTAGCATGTCATGATCAGAAACAGCACTAGTTAGACCATCAGAACAACAAAACAAATAGGCTTCTC  
TTCTCATAAGACATCTCTCTAATATCAAGAGACACATGGGGACGACTTCCCAAAACATTTGTCAGAACGT  
TCCTTCCAGGATACCTTTTACACTTTGTTTTGAAAGCCCATATCGAGAAGCTAAGTGATTCGCAAGAGA  
ATGGTCTTTCAGTTAATCTTTCTAGCATCTTATTTCTTAATCGGTAAACCCGACAATCTCCACATGAAAT  
AGCCAAGCTTTACCTCTTCGGAATGTCATAACAATCAAGTAGTTCACATACCTTTGAATTCCTCATTCG  
ACAATCCCTGGCGATAAATTAATAAGTTTACCTCTGATACTATAGTCTTTTATAGACTCTTTTATACTGCTC  
ATCTCCAACCGTTCCAAATCTACTTTATGTAAATCGACAAGCTGCATAAGATTACCAACAGCCTCATAA  
GAAGCTACTGCTCCTGCACGATGACCTCCATTCGCTCTGCAATGGCAATGAGCTGCGAATCATAGTTTA  
CCTGCCAAAATCTTCGTTGTTGTGCTAACTAAACCAACATCACTCAATCCAAAGTATTCGAAATCCGC  
ACAATCATCACGCCCTCTCCGCCAAGGAATTTCCATAGACGGTTGATAAATCAATCGCTTAAGATTCCT  
CGGAGGTATAGCAAAGATTCCTTTAAAAAAGAAAGCAAACCTTTATCTGTATAAAAAGGTTGTTAATCTG  
TTTCTTTTTTCAAAAAAAGTTTTGTGTAAAGAGGGTCTATCTCCAAAAGATGGGAAGAAGAAATTTTTATT  
CTCCCTTCCCCCATCAACAGAAGTATTTTACTCTGCCGAAAAACAACACTTAAGTATAGTTGGGTAT  
CAAAAGTTGCCTCCCTTTTAAATAACCCGTACTTAGAGGATTCGTACAATGACAACGTGGACTTTGAATCA  
CAATAATCTTACAAAATTCCTGACCCATGCTCAGCTAGAACCCTTTTGAACGAGAAAGCGGCTTAATC  
TATATCACAGTCCCTGCGGGAGAACATGAGCTTCCCTCTTTTTCTGTTATTCGTAATGAAGGAGAAGTTT  
TGCAACTTGTCTGCTATTTCCCTTATCAATACAGCAGAATCAACGTGATACCACAGCAAGGCTTTTACA  
TCTCGTCAACCGCAGCATCGACATTCAGGATTTGGAATGGATGAGGAACAAAACATTATTTTCTACCGT  
CTAGTTATCCCTTGCCATAAGGGCGAGATTAATGAGGACTTACTACGTGTTTACATTGATAACAATCAAGT  
TGATTTGTGATAGCTTCTTCCATGCAATAGGATGATCTCGACAGGAAACATGGATCTGGATGAATTGAA  
AAAGCAAGCAAACTAGAAAATAACCAATCCGATCAGCTAGAGCCTTAGAGGAACCTTGTGCCAGCTTTAA  
TTTTTTATGATACAGAAACGACAGGTACGCAGATAGATAAGGATCGTATAGTGGAGCTAGCTGCTTACAA  
CGGGACTACGAGCGAGTCTTTCCAAACGCTAGTAAACCCCTGAAATCCCTATACTGCTGAGGCAACTAAA  
ATTCATGGTATTACGACTGCGGAAGTAGCCGACGCCCCAGATTCAGAGAAGCTTATCAGAAATTTATCG  
AATTTTGTGGTACAGATAATATTCCTGTAGCTCACATAACAATGCTTTCGATTATCCCTCTGTAGTTG  
TGAATGTCGTAGACACGGCTTATCTGAGCCTCAGCTTTCGTAATATAGATTCGTTAAAATGGGCAAAAAA  
TATCGAACCGACTTGCCTCAGCATAGTCTCCAATACCTTCGTGAGGTATACGGATTCGAAGAAAATCAAG  
CGCACCGAGCATTAGATGACGTAATCACTCTTTATAGAGTATTTTCAGCTTTAGTGGGAGATTTGTCTCC  
TGATCAAATTTATGATCTACTAAATGAGACTTGTCAATCCCTCGCATATTTAAAATGCCTTTCGGTAAGTAT  
AAAGGGAAACCTCTTCTGAAGTCCCCTCTAGTTACATCGCCTGGTTACAAAAGGTGATTACTTGCTAC  
AACCAGAAAATAAAGAAATTAAGCAGCCATTGAGGCCTATCAGCAATTGAAATGACTTTTTTCAGCAGCG  
TTCTCACCCCTGTCTAATGACATCTTTCTTTTTCGGTCTTTCTTGAAAAACATAAAGGATTCCTTCGT  
TACGCCAATCATGATCGCGGATATTTCTTTTAAATTATTACGCTTTAGAGACTCGTTTTCCCTAAT  
TAAAATTTCTGCAAGCTTATACCCACAGATCGCTGATTCCTATGATGTTTTAAATGTTGGCACTACTCTG  
GGATACAAGATCGGGCCTTAAATTCCTTTCGAAACAATTCGATTCCTCATTAAAAAGCCTTGCTACCCAG  
GTGAAACGACAACAGCACAGCTCTTTGCCGCTCTTCTACCCCTCGAGCAGAAGTGGTTCCCTATGAAATA  
TCATGAAATCATTCAGCTATTCCTTTCTAATCGAGTAGATGGTGGAGCTGTGATTCACGAAGAACGCTTC  
TCTTCCCTAAAGATCTATGCATAGTAGAAGATCTAGGTCAACTTTGGGAAAAAATTTGGCATCTCCCT

TACCC TTAGGAT GTATTGTTATCTCTAAAAAGGTATCTGATGACGATTC TTATCTGTAAAGTCATGCTCT  
TCAA GAATCCCTAAAAAATCTTTGACTGATTC TGCTTTAGCTATTC AAAAAGCTTCT GAGTACTC TCGA  
GATAAAA ACCCAACTACC ATTC AACATTTTATAGATACCTACGTAACAGAAGAAACCTTTAACCTCTCTT  
CTATCGGACGGCAAGCTTTTTCTACATTATGGACGGCTTGTGTAATGTTTAAAGTCCTTCTTATTTTTG  
CTGATCC GGCAGAAGCTGCTAGAAC ACTCTCTCTGTTTCCTTTTTCTCTTAATAAGGAGAACTTTTATAC  
CTACCATACAGAAAACGTTCTGTAGATGTTATGGTACTAAAAACATG GGGT TACCGAG GAGT TGTTCAA  
GCATTAAGCCCCCTCCAAGT GGAT ATGACCTGT GGAT AAATGCA GGAT TTGCCGGAGCAGCCAATCC AA  
ACATACCTCTTCTTAAAACCTTATACGATTACCTCTGTAAAA GAAT TA ACTC CAACAACCTTCTGTGGAAGA  
AGAACTTGAAGTA ACCCC ATCC CTAG ACTC CCTCTAGCACAATGACATCAGTCAGATCTCCGTATAGA  
GAT GGGT TTCATGAACATTTACAGCTAGTCGATATGGAA GGAT TTTTCATAGCAAAAACAGGCTTCGTTAG  
TAGCGTGCCCATGTTCTATGATTAAGTATCTTCTGACTACACTACGCGGAAGGACAAGACTTCTTAAA  
AAATACAAAGTCAAGCTCTCTCAAAAATTAGCGGAGGCTATCTTCCGATAT ATTC CTCGTTTATTGAT  
GTTTAAACAC ATCC CTCCACGGACCATCATTTTACGACGGCATT GAGT TCCAGTCTTAGCACCTGATA  
AG ACCCAC ATTC TTTGAAAAGCTGGGCAA GAGT CTAATA ACTC TTTCTTGGTTCCCTTGCTATTTTTCTT  
CCCTTGTTC AAGTAAACA ATCC GATCTACGT ATTC GAGAGT GGAGAGCTTGTGGGCAATGATAATTTGT  
GTACAACGGCCTTTTAACTGCCGACTATCTCTTAAACATAATTTTCGCTAATGGC ATCC AATGCTGATG  
TTGCCTCATCTAGCAACA GAAT GGAGGTGTTATGCAGCAATGCTCTAGCTATTGTCAAACGTTGCTGCTG  
ACCTCCAGATAAAATTTTTACC GGATTC CTCTAATAAGCTGTGCACGCCTTGAGGCATTTTAGAAACAAAT  
TCGTAGGCATGAGCTTGCTTTAAAGCATGAAATACTTCTTCTTCTAAAAAGGTTCTGCCACAAGTCAGGT  
TATTC CACACCGTATCATA GAAT AAAAAT GGAT GCTGCAGCACACAACCAATATGTTTCTTAAA GAAT T  
TTTTGCAGTAGCTTTGTATCGGAAGT GAAT CAATTAACAGTTCCCATGAGAGACTTCATAAAGCCTTGGC  
AATAACTTTGTATGGTAGATTTCCAGATCC TGTGGACCAACAATACCGATAGCCTCCCTTTTTTTA  
ATACTAAGTTGAA ATCC GATAATACGGGACT ATCC CTACAT ATCC AAA GGAT ACATTACAAAACCT GAAT  
ACTATGTTGTA ATCC CTG GAATTC ATTTAACTTTTCAGAAACATTGGACTGCTGCTTTGCTAG ATCC AAT  
ACTTCATAAAACCGTTCTGCAGCAGCGC ATCC CCGCATGAT ATTC GCATTTTCATCAGCAAACTTTTTAA  
TC GGAT CATAAATGAGATACAAAAGACCACAAAAGACCACAAGCTCCTCAGGTG GGAT ATGAAAATGATA  
CAAACCGATCATAATGACC AAAGCAAAGAACAACGAGGCAATAGTGTGCAGAAGAGGTCTTG GAAT TAAA  
CTATACACAGCACTGCGCTCTTCCAATCGAGCAATCTCATCATTTTCTGACAATACTTACTAAAAGAAA  
ACTGCTCAGTTCTAAATACTTTTACTGTAAGAAT ACCTAAAAGAAA ATCC AATAACGCAGCGGCA GAAT G  
ATCTTG ACTC TTTT GAATTC GTTTAGCCAATGCTTTAACTTTCTTTGCAATGATAACAATTGGCAAATA  
AAAATAGGGAACGCTAAACAACACAAGCACAAAATTTCCAAGAAAATAGACAAGCACACTACTAAGGCTA  
AAGTCATAGTGATAGGAGCCT GAAT GTA ATTC ACCATAAGGGCATTAATAGCTAATGCAATCATAGAT GA  
AT CTGCTATCACAGCACTACTTAG ATTC CCCATATCGTGTGCATGAAA GAAT GTCATCGGGAGCGTTTGT  
AAAGCTAAGAAGTAATCTTTACGTAAGAGCAGCTCACAC GAAT AGCAATTAATGTTGCTAAAAACCTCT  
GAAAAAATAGCGTTGTTGATTTCAAAAATAGCAACAAC TACTAGAAAAAGCGGAGGCATTGCAAACGAGA  
AAAGTCAAAACAACCAGAGAGATAGGCGGAAAGCCTTTTTGTTATTGACTGAGAGCCTCCT GAAT GTTTC  
GCAATATAAGC ATTC GCTTGAGGCAAAGATAGCGTGTCTCCCTCACCAACAATATT ATCC CACTGTTCAA  
GAAGTTGATCTTTGGACAGCTCTTTCCTTTTGACTAAGGAAGCTCCCTCCTGCTTCCCAAAAAGAAGAAA  
CGTATCAGGACCTGTCTTAGCAATAAGACCTAGAGAAAAAATTTCTGCTTGAGACGTTATCGTTAGCCCT  
AATAT GGAT AAAAGAGAAAAACC GAAT AAAACTAAATGCTTCTTATGCCTCA GAAT CGTTTCAGAAGAA  
GTTTCATATAGACCTATCGTTCC GAAT TTCTGATATCGTTTTTCTAGCA ACTC TTCTACCGGTAGATCTT  
TCAATTTA ACCCATTC TTGAAGGACAT ATTC TTGAACACTACGATATGTGGCCGCAGGAT TGTGATGAGC  
CCCACCTAT GGGT TCTTTGATCACTGCGTCCACAATAGCAA ATCC CTTAAG ATCC TCTCCATGCATTTTT  
AACATGGCAGCAGCATCACTGTTCTTTTTAGGAT CTTTCCATAAAAATAGAAGCAC ACCCTTCAGGAGAAA  
TTACAGAAT AATAC GAGT GTTCTAGCATCGCTACAACATCTCCTATAGCC ATTC CTAGAGCGCTCCTGA  
AC ATCC TTCACCAATCACAATTACAATGATTG GGGT AGCTAATCTAGCTAACT CAATAAGTTTGTGCGA  
ATAGCCCAACCTTGACCTCTTCTTCGGCTGTTA ATCC AGGGAAAGCTCCAG GGGT ATCAACGAGAAAAGA  
TAATTTGGCAAACC GAAT TTCTCTGCCATTTTAGCTAAGCGTAGAGCCTTTCTAAAAGCCTTCGGGACAAAG  
CATCC CGAAGTTACGATGCATACGAGATTTTGTGTCGCA ACCC TTTCTTGCCCTATAAGCATGAAACGC  
TGCCCTT GAAT CTTTGCGA ACCC TCCGACAACCTGCA GGAT CATCTCGGAACGTTTCGATCTCCACAAAGTT  
CTACAA ACTC TTTGCAC ATTC CTTTCGATATA ATTC ACTGTTCTCGGTCTCGAA GGAT GTCGACAAAATTTG  
TACTC TTTCCCAAG GGGT GAGATCG GAAT AAAATTTTTCTTTTAACTCTATCTAAAACGCTT ATCC AATTTT  
TGAAT CTCTGAAGAAGAAAGCAGGCTGTTTTCTTTATTTTTTTCTTTAA ACTC GGCATCGTTTTTTTCGT

ATTCGACAACCTGTTTTTCATGAGGAAGTAGTTCACCGTAGCACGCTCCCTTCTTATAAAAAAGAGTTA  
TTTTAATACAAACAATGATCAAAAAACAACAAAAACCACTATTTGATTATAATGACCTTTGTTTCACGC  
AAACAATTTTAATTTCTCTTAAAAAGAAATCAAGCCTTTTCAAATAAAATGTTTATACTATTTTGTGTGT  
AGGGAAGATTGATCAAAAAATTACTTCCCCAAAACCGATCTTTGCCTTGTAAGAAAAAATTTCCATATG  
CGGACTAGAAGATAAAAATCCGAACAGTCTCTTTTTCTCCTTTAATCAATACGTCATAGGCTGGGCCTTTA  
TAAAGAGTCTGGAGATCCGTGTACGCAATTTTGGACCATTGCATACTTGACATTGCGATCCCTTACAAAAGA  
TAGCAAAAAACGCATCCGTGATTTTCCCTATCCAAAAGAAGAAGCAACATGACACTTTTGCTCAGTAATGTC  
TATACGATAACATGAATAGTGCTAAACAAAGCATCTTGCAAATAAGAAAAGCCTGTTCTCCTGGAAGAA  
GGCTGTGACAAAGCTCCTGCAAAAGATATTGATACTTCTTCGTCCTTTTCTTGACATGAGAACTCTTTCA  
CTTGCCCGCATAAACCAAATCCCAAACATTCCTGGATCCCAAACGCAAGGACCATAGTTGAGAAACCC  
CACATCTCCTATCAAAAAAGCCCCACTCCGCTCTTACAACCACTACCCTAACATAAGCAGAAAAAGAA  
GGCGTCTGCGCATCCAAAACCAAGAGACATATCTGTTAGCGTGAAGTATCTTCTATACGGGCTTCTT  
TTTTGGCAAATAACAATTTACTAACAGCTGTTTTTTCTCGGTTGGATCTAGAGCCTTCTTGACTCACA  
TGCAGGAAAATGTTTCTCTCATGAGAAAATAATGCGTGTGAAAAGCTATCATTTTTTTGAACTTGCTCG  
TAGCTTGTGTCATAAAAATCTTGCAATACGAGACAACAGCATAGCCATCTCAGCATGCTCCCCAGGATAG  
GAAGGCCTCCCCATAAAAAACCTGCTCGACGAAATAATAAGCCGCTCCAGACTGCGTCTGATGCATACA  
AAGGAACGGTATCCTAAGTCTACCCCTTCTTCCAAAGCTGCCAGCAAATAAGCGGCACGAGCGATATCA  
TGAATATGTAACAATGGATGATGTAGAAAACGCTGTATAACGGTTCTTCGCAGCTTCTTATCCTGAAAG  
ACTCTATGAGACTCTTACTTTGAATATCAAAATTCCTCTCAGAGAACGCCTCTAATACGCTCTCTAACCC  
TAACTGCGATTCTACTAGCATAGTTAATAAAAAAGAGCTCCAATGGCAAATAAATCTTGAGGAAATTTA  
GAGTCAAGCTTGCTTACGCTGAAGCTGACTCTACGATCGAAAAGCAAAGCCGGAAAAGGGAAGAGACT  
AAGAAGATTTTGTGGTGTGTTCAATCAAACGTTTCATTCCTTTTGGCAGGAGTGAACCTCACAGCTCTTCT  
AGCAGGAATATGGATAGGTACTGCTGCATTTTTAGGGTTACGACCAACTTTTGGCTTCTCTCTACA  
TGTAAGACTCAAAGTCTCTAAACTCTAATCTATCCCTTGAAGTACGATCTGTCATCTTATCTAAAA  
AATTTTGGATAACAGTCTCACGTGGTTAGGATGTATTTTTATGATCTTGAGATATCGTACTGATTAGTTT  
CTTCTTAGTCATCGTTGCCATGGTAGCTTGTGGCTCCTAGTTAAAGTGGTAACCCCTTGGCTCCCTAAAT  
ACCGCAATATATGCGTATAATATGCATTCATCCCTTGGATTCAGACTTTTTTTTATCTTTTCCATGAACG  
CACAAAATCTACCCACGAGTTGCACTCAACCGAAACCTTCTCCACTACGAATATCCCTTTCGAGCACTTAA  
AGGTCTTGTAAAGCCCTCCCTCCCCAGATTATTTATGCACTTTTTTTTGTCTCTGAGCTTACTGATACA  
GTCTTGTCAACTTGTGCAATCAAAAATAAAGCATGTATGCCTTCTGCAATACCTTTGGCTAAGTGCAGC  
GATAACGAGCATCTAAAAGAGCGGCTCGCTCTTTAAGATGGAAAGAAACCCCTGTTTCCACAAGGACCGC  
AGGCATGGTTGTTTCTCGAATACCGGAAATTACCTTCTTCTACTTTACGTTTCGCGTAAAGCTCCATTT  
TTTTGCATAAAAAGCCAAGATCGACTTACCTAAGCTCTCTGATTTTCTAGTCTTAAATATGTTTTATCAT  
TATAAAAATAAATCTCAGTTCCCTAAAGCAGATGTATTAGACGAGTGATTACAGTGGATACTAACAAAAAC  
ATCAGCCTTATTCGTATTGCTATTGCAGCTCGCTTACTTAGATCGACATATACATCCGTAGCCCTTGT  
ATTATCGTCTTATACCCCATGCGACGCAACATCCCTTGCACGCTTAAAGCTATCGACAACGCCAAAGTTT  
TCTCTTGTACCGTAAATTCCTTATCTGCAGTTCCCTCGTCTTTACCGCCATGACCAAGGATCTATGACTAT  
AAGTTCATTCCTACTTACCTTAGGAATCCCGCAGCATCAGCAAAAACAATACTGGACTACTTAAAGTA  
AGCAGCAACAGCAATAATGTCAAATTAACAAAGGGCTGCCAAGGCTTACACACAACCTCTCGATCATCA  
AAGACAATCGTCTGATGTTTGAAGATCTGATACCCCTCATGTCCCTTTCCGCAACTAGTACAATATCTT  
TATCTGAAGCCATTGATATTGCTTCTCTATGGCTAGCTTCCATATCACTCTCAACAACATAATGATCAGT  
TGAGAAACCTTTACATATATCAGCAATAATCTGGTCTGGATCTTCTGTCCGAGGATATCTGAAGTCACA  
AAAGAAAACCGTAATGCTCAGATACTTTGGCCATAAGAGGACGCTTAAACAGATCTCTATCTCCACCAC  
ACCCAAACACAATAATTAGCCGACCATATTTAGGAAGGAGTTGTAATAAAATTCGTGATACATTTGTTCAA  
TGCATCTGGAGTATGGGCATAATCAATATAAACAGGGAATGGCCCCAATAAAATCGGATCCAAACGTCT  
TTAGGAGCTGATAAGAAACGAACATCGCGTACTAAATCAGCAAAGTCTCCGCTAAAAATTTGATGGACAA  
CAGCTAAAGATGCTAAAACATTATATACATTATGTTCTCCTATCAAAGGATGTCTCACAAAGGAAAACCTT  
CCCCTGATACCAAATGTCATAAGAAGATCCCTGATGAATACAGCTTCAATCTATCTGCTCGATAATCAGCT  
TCTTGATGGATGTCATAGGAGACTGCTTTCCTGAGAACCATTTAAAAAGCTGGGCGCATACTCACAAAT  
CCAAATGACAACAGCTATACCTTCTCTGGCAAGGAAGCGAAAAACTGCTTTTTAGCTGCAATATATTC  
TTCAAGAGACCCATGAAAATCTAAATGATCTGAAGTAATGTTAGTTAAAATCTCAGCTAAGAACTCTGTT  
TCACGAATCTGACCAAGAGCCATCCCTATAGAAGATACTTCCATAACGGCTGCAGATAAGTTCTGCTTAA  
CCATTTAGCAAAAATCTTCTGCAATAAAATCGCATCAGGAGTGGTAAAGCTATCAACAATTCATTCCT

ACCTAAAATGTGCTCTATGGTTCCAATAAGACCAGTTCTT**ATTC**CTGAACGCTCCATAAGTTCTCTAACC  
AAACAGGAGACTGTTGTCTTCCCATTAGTTCCGT**ATTC**CTATTAC**ATCC**AGATGCTTTGAA**GGAT**TAT  
TATAAACCTTGCTGCCAAAGAGGCTTCCAATGCTATA**GGAT**CTTCTGCGATAATCTGAACAACCGATAA  
AAAA**GGAT**TGTATAGAGAAGAGAGA**ACT**GCAATCGCTCC**ATTC**GCAACAGCCTGAGAA**GAAT**AGTCATTG  
CCATTGCAAAACTGCCCTTGTGCGAGCGATGAAAATATCACCA**ACTC**CAACACAACGA**GAAT**CTC**GAGT**CA  
AATTTCTAACAG**GAAT**AG**ACTC**GACTTTCCATAAAATTTTAGCCG**GAATATTC**CGAAGAAGTTGGTCTAA  
ATGCATAACCAG**ATCC**CTAAGACACGCACACAAGGGCTTCAAAAAGCGTTCTCAAAATAGTTTACTATACAC  
AT**ATTC**GTTGTCAAGCTTGTGCGACTAACTACGTCTGTGTCAGAGAAAGAGCAAAGACAAGAGA**ACTCG**  
TCTTTTT**ACTC**TTTACAAAAAAGTA**ACTC**TTATATGGAGCAAAGAAATGTTTTGTTTGTGAGATATAA  
TTATGAAATTGCTCTTTTCTTTATTATTAGTTTCTCTCCCGCTTTCCTTATGCCAGGCTGCAC**ACTCAT**  
**CC**CAAAGCAACAGACCTCAACAC**ATTCACTC**ATATCTAAATA**ACTC**ACTATTTGCG**ATTC****CATTC**CTCA  
TATAGCAGCTTTAATTGAGAACTTCTTACGATAGGTGTGTAGTTGCTCGTCTAATGGCACACCTAAAT  
AAGGCAGC**ACTC**GAGAAGCT**ATTC**TCGAAAATACAGGAGCAGCACACCGTCCCTCCATATAGTCTTAGT  
TCTGTCTTCTCTT**ACTC**CATAAGCA**GGAT**CGTGCATAGAAACAA**GAAT**AACTAAAGGA**ACTGCAGTATCC**  
GATAAAGCAGCTATAG**GAGT**AAGCCCGATAAAATGAAGCAATGTGCCGTTTTTTTATCATACTTCCCATCGA  
CTAATTTTTCTGTTGTCCCTGTTTTCCCTGCACTA**GAATATCC**CTTAGTAGCAGCAC**GAATCC**CCGTCCC  
TCCTAAACATGTTGTGAAACGCATAGCACGAACAACATCTGCAACTATTTTTTCAGAAAGAA**ACTCGAATT**  
TTCTTT**GGGT**TTGAAGACAGTATTTTTTCTTCTCTGAAGGAGAAACAATCTTTCCTAACCAAGGTTGGAC  
GTATCAAAA**ACCC**TCCATTACCAAAA**ACTGCATAAGCTTGAACCATCTGCATGCTTGTAGCCAGCAAATT**  
GT**ATCC**CATTGCCAAA**GAAT**AAGGTGTGATAAAAGACC**ATTC**GGGAG**ATCC**GTTTTTATGAAAACGTTTT  
CGTGAAGGAACCA**ATCC**TACAGCTTCTGCCGGCA**ATTC****CAATTC**CAGTTCTTTTTCCAAAACCAAATCTT  
GCAAACGCTGTTTACATCAATCAGCACCTAACTTTTGTACTATACGATCTGCAAGTTGAGCCATATACAC  
ATT**GGAT**GACTTTT**GAAT**CGCCATGTACATATTTAAGTATCGATTACTGACAATGCTTTTTAGAGGCATT  
TTTTGCCGTCTTGAAAT**ACTC**GTCTACTAACATCTAACGGTTCATA**GGAT**CAAAAAGATTTTTCTCCAG  
CACGTTTTTGCATCTCTTCAATTTGCTAATAAGGCAATAGCAACAGTTAT**GGGT**TTTATAATAGAGCCCGG  
CTCAAACACATCGCTAACAGCCTTAACTTTTTGTATCTTCTATGCGATCATTGCAGTTGAAGT**ATTC**CCTA  
**ACTC**TCTC**GGAT**TAAAAAG**GGAT**ATTGCGCTAAAGCTAAGATCTCTCCTGTATGT**GAATTC**AGTACAA  
TAGCTCGCCACTACGAGCTTTAGCTTCTAACACGCCTAGGGCTATCTCTTGTCTGCAATCGTCTGTAC  
ATTGGCATCTATTGTTAGATAAAATGTGCTCCC**ATCC**CTAG**GGAT**TTTAGTCACCTTATCAACGTCTAAA  
CGGTTTAAAGGAGAACGCAACAACCTGCGTCTCCATTTTCCCTTCTAACAAACGATTAAAATAAGCCT  
CTAAACCTCCTGTAG**GAAT**GCTTCTCCTGATTTTTCATCTTTTATCTCCCGAA**GGGT**ATGCAAAACCTG  
TCCTAACAAATTTCC**GAATGGAT**AAGAACGTTGATAATCACTAATAAA**GAAT**AAGGCATTTGACG**GAAT**  
TTATGTTTAACTGCGTAAGGTTTCCACCAACTTAA**ATCC**GATCAC**GAAT**AGAAACATCTAGAGAAACGT  
ACAGTTTGCAGATAACGCGATTTTCTATCA**ATTC**ACTAC**GGATACTC**TGATAGTCCCCTTCGCCAACCAT  
AACAAACACATAACGAGCAATCTCATCGCGAT**ACTC**TTCCG**GAAT**AACGACAGCATCTAAGCATAAATGA  
AATTTAGTGATATCAATAGCTAAC**GGGT**GAAATTGCTCTTTTTGCGCTTTACGCAGACTGGTATTAGCAA  
AAAAGGTTCTCTTTGAAA**GGAT**CTTTAACGCGAA**ACTC**GTGTTG**ATTC**GCCGCTCCACAGCCCACCG  
CTCTCCATCACAAATTT**GAAT**TTTGTAAATAACGAACCTATTAAGAGCGCGTATAGAGACAAA**ACCC**CAACA  
ACGATCA**GAGT**TAAATGCTACGGT**ATTC**ATAAGCTAAAACACTGATTTTCTCTTCGCTAAGAT**ACTC**T  
AGATACTGGT**ATTC**TGGAAGAAAAGCTATCTGCAACAATGTT**CAGGGCTTTCTAATTTCTCTAGTAAAA**  
AACTAAGCGCAACATTTTCTTGTCTATCTGACGCAATTGAGCCATAAACAAG**GGAT**TTCCAAACGAAG  
TTTTGTAAAGATC**ATTC**TGTTTATCTATATACCGATAAAGAGCGCAACACAAAAGACTTAAACAGACAAGT  
AGTCGCGAAAACCGATACCT**ATTC**ATTACTTATCTTCAAA**ACTC**TTTTCAAAACACGCAACTTAGCTGA  
ACGTGATCGA**GGATTCATCC**TGGTTTCTTATAAGAGGGCATTATCACTTTTTTAGTCAATATCTTACCA  
AGCCCCCTAGCCTCAGCTTCTTAAAAGCCCACTTAAACAGGACGATCATCTAACTACAAAAGAAATAA  
CAGCTAAACGCCACCAGGACGTAACCAACGGAAAGCA**GAGT**CTAACAAAACCTTTAATTGAGCCCCTTC  
CTGATTAACATAAATGCGCAGAGCTTG**GAAT**ATCAATGTTAGT**GGATGAAT**TTTCTTTCGCAATCGATAG  
GAAGGAAAG**ACTC**CAGACGTAGCATCTTTTAGATCTTTAACGGTCAAATCTTTTTCTTTTTTCTAAAT  
GCACTACAGCTGCCGACG**ACTC**CTCAAAGAGGCTCTTCTCCGTAGTTACGAAAAATTTCTCCAATCTC  
TTCTTCCCTTAA**GAAT**TAAAGCACTTCACTTGCAGT**ATTC**CTCGAGAAGT**ATCCATTC**GCATAT**CC**AAA  
**GGAT**GATCTTCTCTTGAAACTAA**ATCC**ACGTTCAAGGTTGTTAACTGCATAG**GGATACTC**CTAGAT  
CAGCAAGC**ACTC**CATCATACGTCCCATCAGAAGTCAGTGT**ATCC**ACTTCTTCAAAAGAAAGCATGTCGCAA  
GCGCACGCG**ATCC**TTAAAAGGAAGTAATCTATTTT**GGATA**ACGCCAGCGCAGACAGATCTCT**ATCC**GAC

CCGTCATACCGCTCTATCGAAGGAAATTCGGTTAAAAAAGCTTCTGCATGACCACCTGCACCAACAGTCA  
CATCACAAAAGACTACTGGATTACGACCGCGGAATAATGAAAGACTCTCTTTTACTAAAACAGGAATATG  
AGGAATTGAATCGGTCACGGGGAACCTTCTGCATAAAAGTTATTATCCATCCACTACTACAATAAGCCGC  
TTAGCTGCGAAAGTACAGCTTTCAAAAAATTCCTTGTAGCTAAAGCAGAAGGTTGCAGTGTATCGCATG  
TTTAGTTAAAAGCACAGCTCTTCAATACACCTCAAACAGCAACTTATTACATCTAATACCTTAAAAACCT  
TTGCTTTACGTTCTCCCTCTACCATACTTGACTTTTTCCCTCCCCGATTATGATTGAGATTATGAGCC  
TCTCAAGGAAACTTATGGTCGAAATTTTTAACTATAGTACCTCGGTATACGAGAAACACAGCTCTACGA  
ACAAGCTTGTTAATGACTTCCGTAAAGAAATCCAAATGGAAGGCGCAGCGATTCGGACATAGCTAAGCA  
TGCTCAAATCTTAGATATGACACCCAAGCCTTCTGCGTTATCAACGCTCATGCAAACAATAAAAAAACT  
TGCTGGGCGTCTTTTCTCTCCAACCAATTTTCATAAACAACGATTCCTCCACTCTTACTTAGTACCAT  
CTCTCGGCTCTCTGATAAACAAGACCAAGACATGGAAAAAATCTCTTCTATTTAAAAGTTCTAACTAG  
AGGTAAATTTTCTTACCGCTCAACAGCTGACACGCTTTCACGAAAAAATAAACGCTCCTCTGATCAAAG  
AGAAATGGACAACATTTTGAGCAGGAAGAGCTTGAAGCAGAAGAGGAAGTTTTAGTACGAGAAGGCACAG  
TATTGCTTAGAGCATTGGATCAAGGAATCAAGAGTCTAATCTCCTTATCGATTATGTTATTTCTCGTAT  
TTTTCAATTCGTACAAGGTTAAGCGTATATGTTAGATAATGAGTGGAAAGCAATTTTAGGATGGGAGAC  
GAAGAATCTGAAGAGCTCCGCATTTCTGGATATTCGTTCTTCGTCAAGGGCATTATCAGAAAAGCTATTC  
TTTTTTTTGAAGCTCTCGTTATCTTAGACCTCTAAGTGTATATGATTTCCAAACACTAGGAGGACTCTA  
TTTGCAGATTAGCGAAAATACCAAAGCTCTTTATGTCCTGGATCAAGCTTTACGTATGCAAGGAGATCAC  
CTCCCTACCTTGCTCAATAAAACTAAAGCTCTATTCGTCTCGGACGCATAGAAGAAGCATCAGCGATAG  
CTTCTACTTAAACGTCGTGTCCAGATCCATCATTCAGACGATGCCGAAGCATTACTACTTAGTTATGT  
AAAACCCCTTGGTTGCTGTTGATAATGCATTTCTATCTGGGAGAAAGCAAAAAGTCTCTTCTTGAGA  
GATTCCTTCTATTATTGAGTATTAATAATTTGTTTCTGATTTAGGAAAAATGATAGAAAAACTTC  
TTGTCCTAAGCGTATTTTTGAACGAAATGTATTGATTGCTTATCAATAGCAATGCTACATTTGCGGTTT  
TCTCCAGGAGGAGGGTGCATTACC GAATCCCTTAATTCCTCAAGCGATAAAGAGAACGCGATGTTAACTTG  
CAATGATTGCAGCACGTGGGAGCAGTTCGTTAATTATATTAATAACCCGCTGCTCTAAAACAGCCTTTGAA  
AACTGGATTGCTCCTATCCAAGTACTAGAAGAATCTAGCGAAAAATTCGATTAGAAATTC CCAACATAT  
TTGTTCAAAGTTACCTCTTGACAACATAAAAAAGATCTTTGCTCCTTTGTGCCCTCTCGATGCCGAAGG  
AAATCCGTCCTTAGAATTCGTTGTTGCAGAGATCAAACGCTCTTCTCCTTTAGTA ACTCCGCTCTATCGCT  
AAGCCTGCTACAGAAGTTTCTGAAGA GAATAAAGATTTT CAGCTTAAGCTTAATGGAGCTTATCGTTTCG  
ATAATTTCAATTGAAGTCCATCCAACCAATTTGTAATAATCGGCAGCTCTAGGAATGCTGCTCGTCCAGG  
AAGATCGTATAATCCCTCTATTTATTCATGGTG GAGTGGATTAGGTAAGACGCATTTGCTTCATGCTGTA  
GGACATTTATGTTGCGAACATCATAAAAAATCTCCGCATACACTGTATTACAACCGAAGCTTTTATTAATG  
ACTTGGTTCATCTTACGTGTAATACTATCGATAAAATGAAAAACTTTTATCGATCGTTAGATTTACT  
TCTCGTCGACGATATCCAGTTTTTGCAAAACCGCCAAAATTTTGAAGAG GAATTC TGCAACACCTTCGAA  
ACTCTGATCCACTTGTCCAACAGATTGTTGTAAGTGTGACAAGCCTCCAGGACAACCTTAAATATCAG  
AACGGATCATTGCTAGAATGGAGTGGGGCTTGTGCTCACGTTG GAGTTCCTGATTTAGAAACTCGAGT  
TGCTATTTTACAGCATAAAGCTGAACAAAAAGGATTAATATTCCTAATGAAATGGCTTTTTATATAGCA  
GATCATGTTTACGGAAATGTCCGTCAACTTGA GGGTGCAATTAATAA ACTCACAGCATACTGTCTCTTAT  
TTAATAAGCCTCTAACAGAAACAACCTGTCCGAGATACTTTAAAAGAGCTTTTCCGCGCACCTTCTAACA  
AAAAGTTTCTGTGCAAAGTATTTTAAAGAGCGTTGCTACAGTATTT CAGGTA AAAATTCAGGACCTTAAA  
GGGTCTTCCAGAGCTAAAAATGTTCTTTGGCTCGACAAGTTGCCATGTATTTAGCAAAA ACTCTAATTA  
CAGATTCCTTGTGCAATCGGTGCTGCTTTTGGGAAA ACTCACTCAACAGTTCTTTATGCGTGCAAGAC  
AATTGAACAGAAAATAGAAAAAGACGCTCTGCTAAAAAATCAGATTAGCTTATGCAA GAATAATATAGCG  
ATAGACTCACCAACACTTTGTGTAGTCTTGAAAAGCTTTCATTATTTTACAGAGACCGTCTTATGTGG  
GGAGAGGAATGTTCAAAAGACCTGCAAAAAATTTCTTTGATGAAGTCCAA ACTCTGTATGAGGATAGTGG  
CGCCA ACTCCAC GAGTTACAGTATATATCCCAAAGAACAGAACGTTTAGAAAAATC ATTC AAATATTTTT  
GAACCAGCTAAGCCCGCGGAAACACGATTGCTATCTCAAGAAGAAC ATTCCTCAATGGACTGATCAACAAG  
AAGG ACTCGCA ACTCAAGAAAGCTCCTTCCCGGAAGAACCTGAAACCACTTTAGGTGAGGGAGTCTCTTT  
CAAAGGAGAATTAACTTTTGAGAG ACTCTTTCGTATTGACGGGACGTTCCGAAGGT ATTCCTTGTCTCTAAA  
GGAAAGATTATTGTTGGCCCTCAA GGATATGTCAAAGCCAATATAGA ACTTGAAGAAGCTGTGATAGCAG  
GAGT CGTTGAAGGCAATATTACAGTAACTGGAA GAGTATCTCTTCAAGGAAGAGCTATGGTTACAGGAGA  
TATTC AAGCAGGAAGTCTATGTGT GGATGAGGGTGTACGCCTGTGTGGTTATGTCTCT ATTC AAGGAGCC  
CCCTCTAATGAGCAAGAGGAAATAG ACTCATAAAAAATCGCGTTGTC GGGTACTTGGCTAAAAATTTCTTC



CGC**ACTC**TTCTATTAAA**GGAT**AAGTAGAAA**GAAT**GCATATGTTTTCTGCT**GAGT**CTAAAGCTTTTCTT  
TTCTATACCAAGATCTCTTTTCGCAAGGAACTTTCAAATATCTTGCTATAG**ACTC**CACAATGTTTCTCT  
CTATGTCTTTTGAAGAAAAGATA**ATCC**GATCAATTGAGCACTGATTTAGTATTAGAGCTCTCAAAGCAGC  
TTTCGAGAA**ACTC**TGCTCTCCACTTCT**ATTC**CCTAAACATGCGCAACGATATAAAGCTAATGTCTCAGGC  
ATAAGCTCATACAAATATAAAGAGAGATGCGGAGATAAGGCTGAACAAGTAGAACAGATCGCCGAAATCT  
CCCCAT**ATTC**AACGTTTCTAAACACCTAGTACAACGATTATCGTAAATACGTTTACTACATCGCCGCCA  
ACAAGATAGACAAATCTCTCTTCTGGAGCTTTACAAATGCAGCAAAGGACTGGAAATATTTGTC**GAATA**  
ACAAATATTAG**GAATCC**TATAACAACC**GAGT**TTTTT**ATTC**GTAAAAATTTTAATAATTTGTTACGTTTTG  
AACGTGTAACGTTCTCAACCTTTCTCTCAGACACAATGCTCGAAAACTTGTC**ATTC**CCTTTGGAAAAT  
TTGTCGTAAAAGCAAATTTCAACACATGACGCCATCGCAGATGCTGTTGATACTTTTTGCTTCGAGCCT  
CTACAC**ACCC**CATCTTCTCCACCGTTCTGTTAGAGATGCTGTTGACGTCAAGCGTT**GGAT**GATGTTGGTTG  
TAATTGCGCTCATGCCAACGATCTTTCGAGCCGTCG**GAATTCGGGT**CTACAAGCTCTGGTCTATCA**ATC**  
**CTCTAATCCACGAAT**CATGGAGG**ATTC**TTACACATATCTGGATTTAAGAGCTATTTTT**ATTC**GTTTCA  
CAAGAGATCGGTATA**GGATCC**GTCTTTTTGCT**GGAT**GCAAAATTTTTCTCCCTCTCCTCTTCATTAGCT  
ATGCTGTAGGAGGA**ACTT**GCGAAGTTCTTTTTGCTATT**ATTC**CGTAAGCATAAAATAGCAGAAGGACTGTT  
AGTAACAG**GAAT**GCTTT**ACCC**GCTA**ATCC**TTCTCCTACT**ATTC**CCTATTGGATGGCTGCCCTTGGCATT  
GCTTTTT**GAGT**AGTTATGGGGAAAAGAACTTTTTGGCGGCACAG**GAATGAATATTC**CA**ACCC**AGCCTAA  
CAGGACGAGCTTTTTCT**ATTC**TTTAC**ATTC**CCTGCTAAAAT**GAGT**GGAGACGTTT**GGGT**TGGCAGTA**ACCC**  
TAGCA**GAAT**TAAAGAAAGCCTTGCACGATGAGCTCTTTGGCAGAGAAGAGCCATTT**CGAT****GGAT**TTTTCT  
CA**ATCC**ACTTGTTTACAA**ATTC****GAATTC**GACT**CTCC****ATCC**GTCAAACGTGTTACATCGATGCCATAG  
CCTCTAATATCTTAAATCTTGAACATGTTCT**ACCC**AAGATGTTCTCCAG**ACTC**AATTTGCGACATGGGC  
AGAATCTT**ATCC**AGTTTAAACAGTAGATCAACTTTCTTGAACAACCTTCAAATTTTTGTA**ACTC**CA  
ATAACCGAAGGAGGTTTAGGGCTTCTTCTGCACACTTT**GATTC**TGCCTGTTCCCTTACTGAGGCTGTTT  
ATGGTATCGGAAAATTTTTCTACAGGAAACCT**ATTC**TTTGGAAAT**ATTC**TAGGATCTTTGGGAGAGACTTC  
AACTGTAGCGTGCTTACTAGGTGCGGGCTTCTTTTGTAAACAG**GAAT**CGTTCTTGGCGAACTATGCTA  
TCTTTTGGTCTAAGTGCTTTTTTCTTTCATGGTTCTTTAAAATCATGAGCATCTTAAACAACCG**GAATG**  
CTGGTGCTTGGGCTCCTGCAAAGTTCTTT**ATTC**CTGCCATCGCCATCTTTGTATTGGAGGCTTAGC**ATT**  
**CGGG**CTAGTATTTATGGCTACCG**ATCC**AGTTTCTTCCCCTGCAATGAAGCTTGCAAATGGCTGTATGGC  
GCTTTTATAG**GGAT**TTCTAACA**ATTC**TCATACGTTAATCA**ATCC**TGCAT**ACCC**TGAAG**GAGT**TATGTTAG  
CC**ATCC**TATTAGGGAACGTGTTTGCTCCATTATTTGATAACATTGCTCTTAAAGCAATACAGACAACGGAG  
**AAT**ATAAAATATGGC**ATCC**AAGTCTCGCCATTATCTTAAATCAGCCTTGGTACATTATCTT**ATTC**ATCTTT  
GTTCTTAGTTTTAATGCTGGG**ACCC**TCCTGTCTTCTGTGATTATGTCCTTGCACCT**ATCC**AACAGCAAG  
CTGCG**GAATTC**GATCGCAATCAACAAATGCTAATGGCTGCACAAGTAATTTCTCCGATAACAC**ATTC**CA  
AGTCTATGAAAAGGGAGATTGGC**ATCC**AGCCCTATATAACTAAAAGCAGTTGCTAGAGATCTCCTCT  
**ACTC**CTCCTAAAGTAACCGTGACAACCTTAAAGCTCATATTTTCAAACCTTTGTTA**GAGT**CTTGCTTACAG  
ATACACAAGGAAATCTTCTT**ATTC**GAAGACCATAATCTCAATCTAGA**GAAT**TTTTATCTCAACCA**AC**  
**TC**CTGTAATACATGGTCTTGCCCTTATGTGGTCTACGCT**ATCC**TACACAACGATGCAGCTTCTCTAAA  
TTATCTGCTTCCCAAGTAGCAAAAA**ATCC**AACAGCTATA**GAAT**CTATAGTTCTTCTTATAGAAGGTTTTG  
GTTTGTGGGGACCTATCTAT**GGATTC**CTTGCTCTAGAAAAAGACGG**GAAT**ACTGTTCTTGGTACTTCTTG  
GTATCAACATGGCGAG**ACTC**CT**GGAT**TAGGAGCAAATATCGCTA**ACCC**CAATGGCAAAAAAATTCAGA  
GGCAAAAAGTATTTCTAGTCTCAGCTTCTGGAGAAACAGATTTTGCTAAGACA**ACCC**TAGGACTGGAAG  
TTATAAAA**GGAT**CTGTATCTGCAGCATTAGGAG**ACTC**ACCTAAAGCTGCTTCTTCCATCGACG**GAAT**TT  
AGGAGCTACTTTGACTTGTAATGGTGTTACC**GAATCC**TTCTCTC**ATTC**CTAGCTCCCTACCGCGCTTTG  
TTGACTTTCTTCGCCA**ACTC**TAAACCTAGTGGA**GAGT**CTCATGACCACTAATAA**ATCC**TACTTAACCTAT  
TTTACAGATGCGTTGT**GGAT**CAACAATCAACCTTTGATCGCTATCTTAGGTATCTGCTCAGCTCTTGGCG  
TTACGACTACGGTGACTACAGCTCTAACTATG**GGATTC**GCGGTTAGCTTTGTCACTGGCTGCTCCTCTTT  
TGTTGTTTCTTTGCTTAGGAAAAT**ACTC**CCGAAAGTGTT**GGAT**GATCGCTCAGCTAATTATCATTAGC  
CTATTTGTGATCTTAAATGACCAGTTTTTGAAGCTTTTTTCTTACTATTT**CGAAA****ACCC**TCTCCGTTT  
TTGTT**GGAT**TAATCATTACTA**ACTG**CATTGTCATGGGGCGAGCAGAAAGTATGGCTAGACACGTTT**CACC**  
**TATTC**CAGCGTTTTTAGAT**GGAT**TAG**GGAT**CTGGCCTCGGCTAT**GGGTGGGT**ACTTGTTTGCATTAGTATC  
ATTAGAGAGCTATTTGGCTTCGGA**ACTTCTAG****GGAT**TTTCGTGTC**ATTC**CCTGAA**ATTC**TATACGCTTCAG  
CAGCAC**ACCC**TGAT**GGAT**ACGAAAACCTAGGTCTGATGGTTTTAGCT**CC****ATCC**GCATTTTTCTTTTAG**G**  
**AAT**CATGATTT**GGAT**CGTAAACATTATTAGAGCTCCAAGACAAAGAGGTAGCGTTTATGTGGTTGGGAG

ACTATTC TTTATTAAATCTCTTAGGGATCTTTTACAAGCCACGTTTATTCAGAATATTTTGCTGTCCAC  
ATTTTTAGGAATGTGTAGCTATTTGGCCTGTTTCATCTCGCTTGTCAACAGCCAACGGCTTGGGGATGTCT  
GTGGCTCTCGTGCTTACAATTACAGGAAGCATTAACTGGTTGGTACATTATTTTATCACAAAACGGGCG  
CCTTGGCTTGGTTATCACCTGCATTAGCAAATATTGATCTCAGCTTCCTAGAATTAATCATGTTTATTGT  
TGTTATCGCAGCATTCACACAAATTTAGAACTGCTCCTCGAAAAGATTTTCCAGAAACCTTTACCTAGCT  
TTGGGAATATTTCTTCCCCTTATTGCAGTAACTGCGCTATCCTAGGTGAGTATTATTTGGAATACTC  
GAAACTATCCTTTTCTGCCTATGGTGGTATTCCTCTTGGGCTCAGGATGTGGCTGGTGGCTTGCATCGT  
TCTTTTGGCAACTATTAGAGAAAAATTAGCTTACTCGATGTTCTCAACACTTACGAGGGACAGGGATT  
TCCTTCATTACGACAGGACTGATGGCTATGGCTTTTATGGATTAACAGGAATGATATTTCCAAACCCA  
CAACATCTAAACCTGCATTTGTCATGAATATAGCCACTGATAGCCACAACCAAATACACATTCAGCTC  
AGAAGAACCAAGGCTTCATAAATGGCGGTTAATAGCCGCCTTTGCTAGGGTCTAAAGAAAAGCTTTTCG  
CTGCGGAAATCTTCGGTGGTGTAGAACCAAAACATCCCTCTGATTCGTGGCATTATTAACAGGAA  
GAATATCATCTTCAAGAGCTGTGTTGACCTCTAACACTTCTCCAGAAACAGGAGAAAGCACCTCAATAGC  
TGACTTTGAAGATTCATAAATACAAAGCTTCTCCCTTCTTTAATAAAAAGAACTACAGAAGGTAGATCT  
ATGTGCAAGATATCCCTAAATGCTCCCGCATTGAGACGATAAAACCAAGTTTTACTATTCGAGAATGAA  
TCGGTCTATCCATACATGATAGTCAGAATAATACTTTTGGCCCTTTCATATTAGTCTACTCAATCCTTT  
AACTAGGGTTGTGAAAAAAACTTCTTCCAAATAGGGTCTTAAAAATTCCTCATTCAAGTGACTTTTAGC  
AAATAATAGCTTATCTAGGCTTACTGGATAATCACACAAGACTTGGAAATAGCAGTGTAAATAGAAAGGG  
CCTTTATCCAAATCGAATAACACATCGGATACTTGACCTTCTTTAAGGCAAACATATCTTCGAATCTTT  
GAGGGCCCCCTGATCACCTCTAGAAAACGTCTTCATGGTTTTCTCTAGTCCCCCAAAAAGATCTCCCTG  
CGCTAATTTTCTGTTTGGAAAGCTTTGACAAAATCTAACTAAACGTCTCTGATATAAATCCGTCGCTTGA  
CTATTTGGAAAAGATTCCTGAGATGCGTCAAAACACGACTAATGCGCTCTTCTGCTTTGTATTTCTCTA  
ATAGAATTTTCTTTAGCCCTTTGCGAAAACCTCTTTTATACGGCAAAACCTCATCCCTTATCTGCGGACT  
GATTACACTAATGGAATAGAAATGTTTATTATCTTGGATATAGCTATCTACAGAATCTTGCTGCATCAGC  
ACATTAGCTAAACGAACACCGTTCTGAATACCTGGTAACACATGATCCCTTACCTATAGACAAGAAAAGTT  
CTTCTCTTGGCGCTCTTTCTTAGCTAATTCAGATTGAATCCGCTCTGGATCTGCACGAAGAATGCTTT  
TCTTACATAGGAATGGCTTTCTCTACGATAGTAGTTTTCAAATTTAAGATATCACGCAAAGAAGAGCTT  
GTTTCTAATTCGGGAATTCATAAAAATTTCTTCAAATTTTCAAGATTTTGATACCCTGGTAGACTT  
GCGCCATCGGCACATATTTTTCTAGATCCGCTAGTTTTACGCTCTGATAAGAAACAGCGAAACGTTTTCC  
AACCAGACACTCGGCTTTACTTCGTACCTTTCTATTGGGAAGGCTTTTTGTAGGGACATCTAAAACATGG  
ACAGAAGGAAAAGCTGTTAAATGAAGGTAGGTCTCAAAGCTTCTAAATCTTCTTTGCTCCTGAAAACCTA  
AACTATCCGGTAAATGGAATAACTCACAGATACC GAATCTTTCCCCTGGAGAAGAATCTTGCAAAGG  
ATAGTAATCGAAACTCACAGCCCCCTCCAGAGATAAAAGAGCTTTTTTATATAACAAAATTTCTCGATAC  
ATACCGAGAAAATCAGACTCTTCTACCCCATAAAAGCATAAAAAGAGGCCACTAACTGCTCGAATGTTA  
AATTAACACTCAGCATGTTTACTAAGTCTGGCAAATGCATGCTGCGCTTATCATAAAAATCTTGCGGAGC  
TTCTTTTAAAGAAGGCATCCCAACCTCTTTTTTTGCTCATCTATAAAAACATAACATTGCCTCTGTAACA  
GAAGAAATGTACTTATCCCAAACCAATCTTTCACATTTTTATATCCGAATAGACGTAAATCACGACCTT  
GAACCAAAGAATGTGCGACTGGAAGATTGAACATCTGACGACGATATTCAGCATTTGTCTAAGAACGTA  
GTGAGGGAATTTTTTTCTTCTAAGAACAGCCTTACTCGAACAGCAAACCTTCTGGAGAGACTGGATCA  
GTCAATGCTGGAATATATGGAAAGCCTCTCGTAATTGAGGCGCGGAAGATTTCAAACCTCTCTGGAAG  
AAATAAAAGGAGCATCGAATCGCCGATACCTTCGTAACTCTCTCTTTATCAAAGCTGGAAATCCAGA  
CTTGTATATACTCAGGAAGAGCTTTTCCCCTAACTTATTCGTTAGAAAACGCTCGGTTAACAAACCCCTCA  
TTAAGAAAATTCCTCCTCCTAGGATTCCTGTAAAAAGGATAGGCTTCATTGGATAAAAATGTTTCAAAA  
GAAGGAATTCTTTTTCAGAATATTTCTTACCCGAAGGAGTCTATAGACTGTTTTACCAGATCCTAATTT  
GTTTGTTTTCTTAAACGGTTTGACCAACGCCTACGCCAACTCAGATAAACAAACGCCAGCGATAACTAGT  
CCGATAAACTTCTTTGATGCTTGTTAAAAAATGCTAACAAGAGACCTTCTTTTTTGGAGAACAATCCCTT  
TTAAGAAAAAAGGAAAACCTACTCTACAGAATTCCTTACGAAGAGAGAAAGAGATCCCTCTAGAATA  
TCTCATGGTACTTGTGCGTAAGATTATTATCAAGTTTTTTCATGGACAAAGACCTAAGGGAGGATCTGTAC  
AGATCCCTCCCTCCCTATTAGAAAGAGTAAAGATGGCATGTATCTCTGTTCTAAGTACCTTAAACAATAATG  
TACAGGATCAAAAATACCAGTTTATAATGTCATCATGAGTCACTGATTTAGAAAGTCGCAAATCTTTTTCA  
AATACTACCTGAGCTTTAGAAACCGCTTCTTTTGAATCAATCACCACAATGCATTCGTAATCGCAATCGT  
TACTCTTCTTTCCAAAATGTAACTGCCTATAACTAAAATATGATCATCTACAAGCATGCACTTTTTTATG  
CAGTTGTGATTAGCTACATAAAACTCGCTCACATAAAACTTCATAGAGGCTCGACTGGGGAATACAAA

AAGCGTTCACAAAAGCGGCCGAGAACCGAAAGTCAATGGGAAATAATTAATTCGATTTCCCAAGCAT  
AGCTTCTAGTGATTCGGGACTCCGATCCGTTCTCCATTGGTTACTAAATAGATTTCTACGCCCTATC  
CCAGCAAGCAGCCATGAGACTATCATATATTTTCGCTACCGGAATAAAAAACATCTGCGCTATCCGGATA  
GAATGTTGAGCTTGTTAATCAGCCGAACATATTC TTCAGCAATCGTGTGTTGATTCATCCGGTCCGG  
AAAAGATAAAATGCATTTTATCTAAAGGTACAGATACAGCACAAAGGCTCGTCTCAATCATAGCACAGAA  
AGAGGATCTAGCTTTTCTATAGAAAAGATTGATTGGATCAATGCCTCTAAAATCATCTAATTTTTTGT  
AACCATAGTTTTT GAGTGAAATCC TTCCACAAAGCATAGTGAGCACAAAATTC TTTTCTCAGCAATGCTC  
CATATTC TTCCGAGACAATCGTTACATCTTGATCTCGCATAGCTGAAGGCCGAAGC ACTCCTCTATCAC  
AGCACGAGGGGAATCAGAGACTTCTAAATCCACATCC CTTTAGAACATTGAAGATCC TCTAAATTTGAA  
CCTCCGATAAAAATGTACTTCCCATCAACAATGGACAACCTTAGTATGCGACTC TGTCACGTTAGGGAAAA  
ATACATTACAATACGGCGGCCAATCTGAAAACAGGTAGAAAACCTGTCAAGGAT AATTTTCTTGCA GAGT  
TTTTAAATTC TTCCGATCATTATCATCAATACATGTAGGTTGGACCAATATGTAGCTTACAAGCGCAGGC  
ACTTCTTCCATACGCTGCTCCAAGCGCTGAAGAACTGTGGAT AAAATCTCTCCTCCTGCTAAAACAAGGAC  
ACAATTC TACAGTATATTTAGCACTACTAATAGCGGCCAACAGGTGTTTCGTACATTTTCATAGCCGTTATC  
ATGAATAAGAACCCTTAGCTTTTTTGTCTCCATCC GAATAGCTATAGTGTGCGCAAAACCATTCAACGAG  
ACAACACAAGCTACAAATACAAATATTTTCCGTAAAAAAGCCATTTTC ATCC TTATTAATCCCTCCTG  
CATAAAGATCCGCATCAAAGAGTCTTTAACCTCTTTTCTAACTCTTTTAATACTGTTGAGGATGCTTCC  
ATCCCTAATGGGAAAAAAGCACTC TTCTCTACCTCAGGTCCGATCTT ATCCACAAGGTCTGGAAGCAAAA  
TATTTTCGATAGAAATCAAGAGAAT TACCAGATAGAAAAGATAGAGCCCTGATGCAAAAAGCCTTGTTTAC  
AGACCTTTGAGCCGCTCCTCCTACTTTTTCTATTTTCTATAAGAACGTCGTATTTAGAAGTTTTTGGCACA  
CAAAAATTAGAAGACTC TGCTCGATCAGTAGATACTTCAATGGGTGATAACGAACCTTCCAATCCAAATA  
ATTTATTGATTGCTTTCAGAACAAAACGATTGACCCTATGATAGTTCGCCAGGATAGAGTCTTGATATAA  
GGGATGTTCTGAAGACACCAAAAGCGAGAACCGTAATCACTATTATGAAATGTAACACCACCACCTGTC  
GGACACTTGCAGCGCTT ACTCCTAAAGATTC CCAGTTAGCCTTTAAGAATCTCTCAGGCTTAATAAAGC  
ATCCATAAGTCAAAGGGAAAATCCCTTCCCCTC ATACAAATGAAGAATGACTTCTCCCTTTCTTAAAGA  
GTCTAGAAGCAAACGATCC TTTTGCATGAGATCTTTAGGAGTTCCTCTAATAGAATCAATGACACGCGTT  
CTCATTATTC AATAAATATCTATAACCATTC TAAATAAACAGACAGAGAACAACCTTCTCCGTTTATTTT  
ACGGAAACATATTACATCAGAACAGTGATCTAATAAAAATAAATAATGCCTGACTC TAAAAAGCTTCTAA  
AAATTC AAAAAAGTCTGCTATAAAAAGTGCTTTAATCTCCCAATTCCTTTCCCTTTACGAAAAGTTGCA  
TCATTATCATAAATGTCGTATATGCTTGAAAAATATTC CACCTTGCCATTCAGGTTTTTATGTTTGAGAA  
GTTTACCAATCGCGCAAAGCAAGTGATTAAGTTGGCGAAAAAAGAGGCTCAACGACTC AATCACAACAT  
CTAGGAACCGAGCACATCTTGTTAGGAT TACTAAAATTAGGCCAGGGTGTGGCTGTTAATGTATTACGCA  
CTCTTGGTGTGACTTCGATACAGCAAAGCACGAAGTAGAAAGGCTGATTGGCTATGGCCCCGAGATTC  
AGTTTACGGAGATCCAGCTCTTACTGGAAAGAGTGAAGAAATCTTT GAATCCGCTAATGAAGAAGCTGCT  
CTTTTGAACACAATTATGTTGGAACGAACATCTTTTGTAGGTATTC TCAATCAATCCGATGAGTGG  
CTTTGCAAGTATTAGAAAATTTGCACGTGGATCC TAAAGAAATCCGAAAAGAGATTTTAAAA GAAT TAGA  
AACATTTAATTTACA ACTCCCCCTCTCCTCCATC ACTCCTAGAAATACTAATAGCTCTTCTTCTTCG  
AAATCTTCTTCTCTTTAGGAGGTCATACTTTGGGCGGAGATAAACCTGAAAAACTTTCAGCTTTGAAGG  
CGTACGGTTACGACTTAACAGAAATGTTTAAAGAATCGCGCCTCGATCCAGTGATCGGGCGTTCTGCAGA  
AGTCGAACGATTAATTTTAATTC TTTGTGCTCGAAGAAAAAATA ACCCAGTCTTAGTTGGAGAAGCTGGA  
GTAGGGAAAACAGCCATTGTAGAAGGCCTCGCTCAGAAAATTGCTCAGGAGAAGTTCCCTGAAGCTCTTC  
GTAAAAACGCTTGATCACTTTAGATTTGGCTCTAATGATTGCAGGAACCAATACAGAGGGCAGTTTGA  
AGAACGCATCAAAGCTGTGATGGATGAAGTTCGTAAACATGGGAACATCC TCTTATTTATTGATGAGCTT  
CACACGATTGTTGGTGCAGGAGCTGCTGAAGGAGCTATCGATGCTTCTCATATTC TAAAACCAGCTCTAG  
CTCGAGGAGAAATTCAGTGCATTGGCGCTACG ACCCTAGATGAATACCGTAAACATATAGAAAAAGATGC  
CGCTTTAGAACGTCGGTTCCAAAAATCGTTGTTCAACCTCCTAGCGTCGATGAAACAGTAGAAAATTC TC  
AGAGGTTTAAAGAAAAAATACGAAGAGCATCACAATGTCTTCATCACTGATGAAGC ACTCGTTGCTGCAG  
CTAAACTC TCTGACCAATATGTTTCATGGTCGATTTCTTCTGATAAAGCAATTGACCTCTTGGAT GAAGC  
TGGAGCTCGTGACGAGTCAATACGATGGGACAACCTTCGGACCTGATGCGTCTAGAAGCTGAGATAGAA  
AAAACAAAACAAGCTAAAGAGCAAGCTATCGGA ACTCAGGAATACGAAAAGCTGCTAGCCTTCGTGATG  
AAGAGAAGAAGTTAAGAGAAAAATTAGGAAATATGAAACAACAGTGGGAGTCCAATAAGGAAGAACATCA  
AGTTCCCGTTGATGAAGAAGCTGTTGCACAAGTAGTTTCCGTACAAACAGGAATTCCTGCAGCTCGTTTA  
ACAGAAGCTGAAAGCGAAAAACTTTAACCTTAGAAAACGACTC TACAAAAGAAAAGTAATCGGCCAAAGTC

AAGCTGTTGCTAGTATCTGTAGAGCTATCCGTCGTTCTAGAACAGGCATCAAAGATCCTAATAGACCTAT  
GGATCC TTCCTATTTTTGGGCCCACTGGTGTGGGAAGACTTTATTAGCGCAGCAAATCGCAATTGAG  
ATGTTTGGAGGAGAAGATTCCTTATTC AAGTGGACATGTCTGAGTACATGGAAAAATTTGCAGCCACTA  
AGATGATGGGATCTCCTCCAGGATATGTCCGTCATGAGGAAGGGT CATCTAACAGAGCAAGTCCGTCG  
CCGCCCTTACTGTGTGTGTGTTGATGAAATTGAAAAAGCACATCCAGATATTATGGACCTTATGCTT  
CAGATTTTGGAGCAAGGGCGTTTAAACAGACTCATTTGGACGTAAGATCGATTTTCGTAATACCATCATCA  
TTATGACTTCTAACCTAGGAGCAGATTTAATTCGGAAAAGTGGTGAATAAGGGTTGGGCTTCGTTCTCA  
CATGGACTATGCAGTTATCAAAGAGAAAATAGATGCTGCAGTTAAGAAGCATTTAAAACCTGAGT TTATC  
AACCGTTTAGATGAGAGTGTATCTTTAAGCCTCTTGA AAAAGAAGCTCTTTCAGAGATTATCCATCTAG  
AGATTAATAAGCTGGGCTCTCGTTTACAAAATATCAAATGGATCTTAATATTCCTGATTCAGTGATTTT  
CTTTTTGGTAACTAAAGGGCATTCGCCAGAAATGGGAGCTCGACCTTTAAGACGTGTTGTGGAGCAGTAT  
CTGGAGGATCC TTTGGCAGAAATGCTATTGAAA GAGTCTTGCCGACAAGAAGCTAGAAAATTACGCGCGC  
GCCTCACAGAAGAACGCGTTGTTTTCGAAAGAGAAGAAGAAGCTGTTTCTGCTTTAGCTATAGAAGGCGA  
TGGCTCAGAGCCTATTACAGCTGATGAATCATAGGCACCTCAATC ACTCCTCCTCCTAAACAAAATGTCCC  
CCTGGTAGAAAGCTACCGTCTGTCCAGGGGTGACAGCTTTACAGGGACATCGAAAATCACTTTTACCGT  
TCCATCTTCCAAA GGATATACAGAACATTTCTCGTCAGGGATCTGTACCGAACTTTAGCACTACAGATC  
ATAGGCTCCTGCAAGGGAACAAACCAATTAAGTTCCCTTAGCTAAAAGCTCTTGTCGATAAAGTAAA GGAT  
GATCTTC ACCCCTTACAATGTAAACAATATTC TTTTCCATATTC TTGCTAAGAACATAACAAGGC TTTTC  
CATTCCTCCTATGTTTA ACCCTCGACGCTGTCCAATCGTATAATAATGGGCTCCTTCATGTGCGCCGACT  
ACCTGTTGTGTATCAAAATCAATAATGTCTCCAGGA GAGTCTGCTACAACTGCTCAAGGAAA ACTC TTAA  
AAGGCCGTTTACCAATGAAGCAAATCCCTGTGCTATCTTTTTTTGTGGCGGTAGCTAAACCAGCTTCTTG  
AGCAATTCGACGTACCTCCGTTTTATACATACCTCCAGGGGGAAAAGTACATT GGATAAAGCATCC TTA  
GGAGTGCCACATAAGAAATAACTTTGGTCTTTATTG GGGTCTATTCCTCTGGACAAACCAGTTCATCAG  
CCCCCTCCTCGACAATAATGTCCCGTGGCTAAAAAATCACCTTTTAGCTCAAGTACCTTCTTCTGTAATAA  
ATCAAATTTGATTTCTCGATTGCATAACACATCAGGAT TGGGAGTGTAGCCGTTTCGCATATTC TCTTAGA  
AATCTAGAAAAC ACTC GCTCTTTATATTCCTTAGAAAAGGAAACTGTGTAATATG GAATGGACAATTGTT  
CTGCGATCCGCTCTACATCGCGAAAATCTTTGGTTGCAGTAC ACTCACCATTC TCGTCTGCTCTCCCA  
ATTTTTCATGAAGACCCCAACAACATTTAT ACTCCCTTGCTTCTTTAAGAGATAAGCAACAACCGAG GAA  
TCCACTCCTCCAGACATAGCAACAATGACAGTTTTACGCACAATGA ACCCAGAAAACGCTTTCTGTTTATT  
GAAGTTTGCACATTACAAAGGGCCATCATGTTAGCAAAAAATA GGATCAAAAAACCTATTTCTCAAGC  
CGCTCTTTTTAAATCTTAATTACAAAAAGACAAATTAATTC AATTTTTCAAAAA GAATTTAAACATTAA  
TTGTTGTAAAAACAATATTTATTC TAAATAATAACCATAGTTACGGGG GAATCTCTTTCATGTTTAA  
TTTTAGAGCTCATCAACCTAGGCATACGCCTAAAACATTTCTTTGAAAGTTCACC ATTCGTTCTCCGAT  
AAGCATCC TCAAATGCTAAAGCTATGTGGAT TACGGGATAGCCCTCGCAGCTCTATCTCTGCTCGCTG  
TAGTCGCTGCGTTATTGCCGTCTCTGCGGGAGGAGCTGCC ATTCCTCTTACTGTCGTTGGTG GAATGTC  
TGCAATGTCTGGCCTCTTATCCGCTGCCACCATTATCTGTTCTGCAAAAAAGGCTCTGGCTCAACGAAAA  
CAAAAAACACTAGAAGCGTCGCTTCCGTTAGATAATGCGACCGAGCATGTGAAT TACCTGACCTCAGACA  
CCCCTTATTTTAAATCAATGGGAATCC TTAGATGCTCTAAATAAGCAGTTGTCTCAGATTGACTTAACTAT  
TCAAGCTCCCGAAAAAAACTATTAAAAGAAGTTCTTGTTCCAGATACG ATTCATTAAATC ACTC CATC  
GAAGAGATCTCCGATCGCTTTACGAAAATGCTCTCTCTCTTCGATTAAGAGAACATTTTTATCGAGGAG  
AAGAACGTTAT ACCCCTATTTAA ACCCCTCCTCTACTTAAAA GAATCGTTTGCTGATCCAAATCACATC  
CAATATGATTAGGATGCTACCAAAATCCGGTGGTGTTTTTTCCCTCAAAGCCAATACACTAAGTCATGCC  
AGCCGCACACTATATACAGTATTGAAAGTCGCTTTATCCCTTAG GAGTCTCTCGCTGGAGTCTGCTACTC TTG  
TCGCTTTTCTTCCCCCTAGCCTGCCTTTTATCGCTGTTATAG GAGTATCTTCTTAGCATTGGGGATGGC  
ATCTTTCCTTATGATTCGGGGCATTAAGTATTTGCTCGAAC ATTCCTCTCTGAATAGAAAAGCAGCTAGCT  
AAAGATATTCAAAAAACCATTAGCCCAGATGTCTGGGCTCTATGGTTCATTACCAGCATCAATTA CTAT  
CACATCTACATGAAA ACTCTATTAGATGAAGCCATCACAGCTAGATGGGGCGAGCCCTTCTTTATGAACA  
CGCTAATCTTAAGGCAAAAATTGAAGATTTGACAAAACAATATGATATATTGAACGCAGCCTTTAATAAA  
TCTTTACAACAAGATGAGGCGCTCCGTTCTCAAGTAGAGAAAACGAGCTTACTTATTC CCAATTCCTAATA  
ACGACGAAAATGCTAAAACATAA GAATCGCAGCTCTAG ACTCAGAAAATGATTC AAATTCCTGAATTTCA  
GGAGATTATAAATAAAGGACTAGAAGCTGCCAATAAACGACGAGCTGACGCTAAGTCAAAATTC TATACG  
GAAGACGAAACCTCTGACAAAAGATTC TCTATATGGAA ACCCACAAAAGAACTTGGCATTAGAAGATTTGT  
GGAGAGTGCATGATGAAGCTTGAATGAAGAGCAACAAGCTCTCTCTTAGAAGATTATAT GAGTTATAA

AACCTCA**GAAT**GTCAAGCTGC**ACTC**CAAAAAGT**GAGT**CAAGAAGTGAAGGCGGCACAAAAATC**ATTC**CCA  
GTCTAGAAAAGCATGCTCTAGACAGATCTTAT**GAATCC**AGTTTAAACCATGAT**GGAT**TTAGCTAGAG**CGA**  
**AT**CAAGAAACACACCGGCTTCTGAAC**ATCC**TCTCT**GAAT**TACAACAAGTACGACAATACCTGTAGATAA  
TACTAACGGTTCTTCATAAATGACAAAAAGAAAAAGGAGAGCTGTTGCTGTGCTCTCCTTTTTCTCTAA  
AT**ATTC**CTGAAAGACTAACCTTTTTATGGTTGGCTTGGAGCCTCCTCCTCCTGTCCCGAGGAGCCCGCAA  
CGGT**GAGT**CTGTAGCATTAGAAATGATAACAGCTCCTACGATCATAGCAATGACGGTAACCACCATAGT  
ACATACAGAAATACCGAAGTTAGCTCGGCGTTTTCGTAACACAAGAAGAGCAAGGCCAGTCCGTCTCGAA  
**GAAT**CACAACGGTATTGATGAGCATTAGATAGGACATAACATTAGTATTATTTGTAGAAGCTGTAGCTG  
CGAAGTA**ATTC**TCTGGCTCCTTATGCGCCTGTTGGTTGGAGCTGCGGCAACAGCTTCTGCAGCTTTCTC  
ATCAGCCTCAGGTTTCTCCGTCTTTGCTTTCTTGGCTTTTTGAAGAGCGGCTCGTTGTCTTGCTCTAGCA  
TTTACA**GAAT**TTTTATTGCGTTTTACACGTGTAGTCAAAGCTTCTCCGCATCATAGCGCAATGTAGAAG  
TAATACTTCCGTCTTTTTAAG**ATTC**TCACTTACCGCACAAAGCCGCACGCCAGATTTACGAGCAGTCTT  
TTCTCTGCTAAC**ACTC**AC**GAAT**CAATTGACGTTTTTCTTCTGGAGAAAGAGAAGCTCGAGCAGCAGCT  
ATTGCTGCTTCTTAG**ACTC****AAATTC**TT**ACTC**TTAGCAAGAGAAGTATTTACAGGCTTTTTCTTGAGAA  
GCTTTCTTTTTATCATCTTTTTACTATTACATAGCCAATCGAAAA**ATTC**TTTTCTCAGACT**GAGT**TGTTTTG  
TCGTTTTTTTAGTCGTTTGAACCACT**ACTC**GAGGCTCTTTACCTCGAGCCTTGTTCTCTTTTTTTCGCAGTT  
AAACGCTGCTCATGATTTCTAGAGAACA**ATCC**ATTTGTAATACAAGAAAAGAA**ATCC**TTTTTCTCAAAG  
AAGCCTTCCATGCAGATTTTCTAGAAGCACATCTTTTTTTACGAAGTTTTTTAAGAGCCTGTCCAGAA**C**  
**TC**CCCTGTCAGCCTGCAATGCCTCTTCCGCTTGTGCTTCCATAATAGTAGGAA**GAGT**TTGGCTCATCTGA  
CTTGATG**ACCC**ATAGTAT**GGGT**GAAAGTCAATAAGATCGAAAGCATAGCAAGTTGCGAAGTAAGCTTGT  
**AACCC**AGCATGACGGCACTTTCTCCTAG**ATCC**ACCTTAG**GGAT**CACCATAGCAACATTAAGCTTTTTTC  
ACAACCTGGACGTACA**ATTC**TTTTTTTATTGATAACTTAAT**GAAT**TTGAGCTTCCCAATTTTTAACAAAA  
GCTAAAAGCTGTGGCTGATCCGGATGCTCCTTAAAGAAA**GAGT**CGAGCTT**GAAT**AGACATGCCTAAGTGCA  
CGATTTT**ATTC**ACAAG**ATTC**CAATGATTTCTATCTTGATTAGC**GAAT**AAGAAGAACA**GAGT**ATCAACAGG  
CTTACCGTCAAGCGCTCCAT**ATTC**AATGCTTTGAGATAAGAAAACGGGAACAATAATATCGT**ACCC**AACG  
TTAATCAAGAAGTCTTAGCATGAGGTAAAGCA**ATTC**CCTCTCCGATACCTGTAGACATAAGACTTTCCC  
GATGCATAAGCATCTC**GAAT**AGAAGTACC**GGATCC****ACTC**GAACTTATTAGCTATATAATGAGCAGCATA  
CCGTAGGGCGCCTTCTTACTATCTACAAGAACATTTTTTTAGA**ACCC**CTCCCTATAAATAGCTCGATAT  
AGGCTATATCTAAGTGACAA**ATCC**TTGG**ACTC**CCCTTTTTCTCTCGTTTTTTCATCTG**GAATA****ACCC**CAT  
GATTGT**GGAT**AAGCCAGTCTTCTACTTCTTCTCTATTGAAACGCA**ACTC**CATCGTTAATCGTGTAAC**TAGG**  
**GATTC**CTCCACAAGAT**ACCC**ATTGTC**GGAT**AGAATCTTCTGCTAC**ATCC**AATAATACAGCTAACTGATCT  
AATCGCAA**ATCC**ATAACTAG**ACTC**CTGAAAAAC**ACTC**ATAACTTCTCAACAGTTTTGCACCTTGTA**GAG**  
**TTGT**GATCTTCTGGCTTCTCATCTCGCAAAGATTGTGTTAATGCCGATAACAGTTTCAGATATTTCGAAGGG  
GCATCAGATGGCCCTCCAATAAGAAAAACAAGCCGCACAGACA**ACCC**GTCTATAGC**ATCC**CACAAAAT**AC**  
**CC**TCT**GAATGGAT**GCCTAGAGCAATAAAAAAATCTGC**ACTC**CCATCGATTTTCCCATGAG**GAAT**AGCT**AC**  
**TC**CCATACCGATACCTGTAGACATAAT**ATTC**TCTCTTGCCAATAGAGCACGAAAGAAAGCCTCCCTATCT  
TCCAGTA**ACCC**AGCTCTGGCAGCTAGCTCCGAAAGTTCAAAA**GGAT**ATCTTCTCTAGTATCT**GAAT**GTA  
AGAAAGTGATTAATCTGATGAAAGTAACGAAGTAAAGTAACAGCTTGCTTATGGTCAGCAACGCAAGT  
CATCTTAAC**ATTC**CCAGTATGCCCAA**ATCC**ACCGGTTCCCGCGCCGTAGCGGTTA**ACTC**TTCTTCT**GAGT**  
TTCGACAAAAGACACTTGTTCAACCTTTGCTACAACAAGCTGTGCTATACGC**ATTC****GGGT**TCTACAAT**G**  
**AAT**GTAGCTTCCGCAAGATTTGCTAAAATA**ACCCGAAT**TTCTCCCCGATAATCTGCATCGACAGTTCCAG  
GAGATTGAAGAACAATAACGCCGTACTTGCTAGCTA**ATCC**ACTACGAGAACGAACTT**GAAT**CTCGT**ACCC**  
ATGAG**GAAT**TTCCACAGAA**ATCC**CAGTAG**GAAT**CAGGGCTCTCTGCCCTGGCAAAATAGCTATAGGCTCA  
TTGATATTTGCACGGACATCTGCGCCAGAAGCTCCAGAAGTAGCAT**ACTCGGGT**AAGGAGCTTCCAG**ACT**  
**C**CAATTTACAGAAAAATTTTCATAGAAGGCCCTCTTTTTGAAGAGCCGCCTATGATCTTTTATTTGTTATC  
ATCTGTCAACAAAAAATCTCTTAAATGGTCTTAGAGATATCTCTGGGGCAATTACCTTTGCCTCCAG**AA**  
**T**ATGCCTGACAGCTGAAAAAATTAACAACTTTCTAAAGTTGTTTGGAGCTGTTTCTCTCTACTACCT  
TATCAATC**ATCC**CATGTTCTAATAG**GAATTCGGAT**TTTTGAGCTCCTTCCGGAAGATCTTCCCTATCAC  
CTGAGATACT**ACTC**GAGGTCCAGCGAAACAAATTAAGCTTTAGGCTCTGCGATAATCACATCTCCTAAA  
GAAGCAAAAGAAGCAGTA**ACTC**CCCCAGAAGTA**GGGT**TCGTCAAAACGGAAATATAAGGTAGCTTGGCTT  
CATGTAACCTTAGCCAAAGCAGCAGATGTTTTTGCCATCTGCATTAAGGAAAAAACAG**ACTC**CTGCAT**CCT**  
AGCTCCCCCTGAAGCGGAGACAATGATAACAGGCAACCGA**GAGT**CTATAGCCTTCTCTATCAAAC**GAGTA**  
AGCTTCTCTCAAACAACAGCTCCCATGGAACCAGCCATGAAACTGAA**ATCC**ATAACGGCTAAAGCAACAG

GATAACTTCCGATTGTACAGGCCCGACTAAAACCCCTTCGCTATCAGGATTATCTTTACGCGCCTTCTC  
CAGACGATTGGGATAGGTATCTGTATCAACGAAATTCAAAGGGTCTTGCGAACGTAAATCCGAAAATAAA  
GGATTCATGAATCTTTATCTGCCAACAATGCTATCCGTTCCGAAACACTAATCCGATAGTGGTACGAAC  
ATTTGGGACAGCAATTTAAAATTCGTCCCAACTCATTGGCATGAATCATTTCGCTACAATGCGTACATTT  
TAGCCAGCCACTGAAGCCATCAGCTTTTTATTTTTTGCACCTTTGATCTTTGGTTTATCGTAAGAAAATAAA  
CGCACAAAACCATCCCTTTCACAAAAAATTGAGCAATAATTTTATTATAATTTTTTTAACCGATCAATAA  
TAAAATTATTGCTTGCTCATTCTACAAAGCGATTCCTATATAATCCCAATTAATTATGCTCGGGAAAC  
TTTTTAGATAATCTATTCACATTTTTTATACTGGAGATAATATGCGTGCTCCACACATCTACTCCTAG  
GAGAGGGATCATCCCGGTCTGCTGCTCTAGAGGATCCGGTTTGTGTGGTCTGTACCACAAGCTCTTGT  
TTTTTGGGACAAAAAGCTAACCATCCAGCCAGATCCTTGCACTGCAGCAGAAGAAGCAATAAAAATTTT  
TTAAAAACTATCGAAAGAGCCCCGAATTTTTCGATTAATTTTAGTAATTCATGACGAGGAGGAATCC  
CCCTCCTTTCCCTTGAGGCGCAAGCATCTCCAGAAAAGAGAGTGGTTAATATGCCCTCCACCATTGAAA  
CGCAGAGCAGGATGATTGCGATTAGCCTTGTAAATCTTGAGTAGCGTTTGTCTACATCTAAACTTTTTTA  
AGGCCTCATTCAAATTATTTATATATCCTTGGTGATGCTTTTGTATGATGCAGTTGCATAATCTCAGCACT  
AATTACAGGCTCTAAAGCATCGTAATCATAAGGCAATGCGGGAAGCATATAAGAAGAAAAGACCATAGCC  
ATCCATAAAAAATAAGGTTACTATCCTCGCCACCTTCTCTATTTTTCTACAGGCTAGCTAGATAGATCCCTC  
TAGATTATCAATAAAAATATTCACTGTCAAGAGCTATCCACATCTTTACGTAAGTAAAGAGTAAAA  
AGGTGACTCTTGGTTCTTTAATGAATGTTGCAAAGCTTCAAAACTCTCCTTTTCTCGAGCTTCACGGA  
CAGTTGCTCTTTAGAAAATTCGAAAAACTTTGCTTGATTTCAAAATACAGCTTCATTTTTCGGCTCAGT  
TCCTGAAGGCCGTACAATTACTTACAATCTCCTTCATAATAGAAAACAAAGCATCGACATCTGGGTAAA  
GATAATTTGTACGTAATATCGGTAACATAATCGGTCCTTCCCTGTATTGTAATTTTCAAAGGCAATTA  
ATTTACGACTTGACAAAGACATCCGAAGAGGATCCGTGTGTTTCCCAACGATCCAACAGTTCTTGTTCGG  
CTGAGGTTGATCGATAGGAAGATCTATCGACTCTGTCCGGTTAGCATAATAGCCATAGACCTCATAAAGC  
TCTAACAGAGCATCTCGTAACGTACACCTCGTATTTTTTGTGCAACGCTGCCTCAGAAATGAGCACCG  
CAGCAATCATAGCGTCTTTATCTTCTACATACGAGCCATACAGATACCCATAAGACTCTCTGCTCCAAA  
AATAAATCGCTCCATACCGGAACGCCATAATTCATTTTTTTCACCTATATATTTAAAGCCTGCACCAACA  
TTAACGATATTGGCTCCATAAGACTCTGAGATAGCTGTTAAAAGCTCTGTTGTTACAAGGCTCTTCACTA  
CTTTATCTTCCGCACCCAAAGGAGCCTTTTGGAGACTCTTTACTCAAGATATGTGCGGCCAATAAGCAAGC  
AATCTGATTACCGTTAAATCTATAAGGGCCTTCTTCTCTAAAGAAACCACCTATTCCTGTCCGAATCT  
GGATCTGTTGCGATAAACAATCATCTTTTTGCTCTACCATTGCTGAATACCCAAATACCAAAGCTTCTG  
GATCTTCAGGATAGGAAGAACCCTGTAGGGAAGTCCCATCTGGAACCATTTGTTTTTCAACCAAAGA  
CACTGAAGAGAAAACCCCAATCTTCAATATCCTCGGAATCATAGTTACTCCAGTACCATGTAGTGAGAA  
TAACTGATTCGTAATAACGAACCATGCCGCCGATTATCTTCTCGCATAACTGCAGTTTATGTAAGT  
CCTCGTAGTAATTCATCATATCCCTTGAATCATGCGAATATATGGATGATCTAACTCTCTACAGCAGA  
GACCATCTCCACCTTCTGGAACCTTCCATGATTCTCTGATCCATGGGCGGAAGGACTTGTCTCTGTT  
GACATGTATACTTTATAACCATTGTAGGCAGGAGGATATGCGAAGCGGTAATCATGACCCAGCTTTAG  
CCTGAAGCTCTCGCACTGAATAAGAACTAACGCCAAAGGCTCTGGAATCTGAAATAAATAAGCAA  
ACCGTTACCAGCTAAAACCTTAGCAGTCTCTTGTCCGAACCTCGAAAGAAATCATGACGCGTATCATACCC  
ATCACAACACTAATCTTCTCATCTGGATATCTTCGCTTTAAGACTCGGGCTAAACCCGTGTGTTGCTCTCC  
TAATTGTA AAAACATTTAAGCGATTTGTCCCTATCCCATGAGACCTCGTAATCCGGCAGTCCCAAAGGT  
CAACGTCTCACTAAATAACTCTCTCAATCGCTCAGGATCATTATCAAGCAGGGTTAAAACAGAGGTGTGG  
TCGCAAACAACATCCCAAGCCAAGACAAAATGTTTTGGCTGTTTGGATCAAACATCCCTCTATTT  
TCCTCTAGGAATTTCCATAAGACAACCTTCCGATCAGAACGAAACACTCATCCACGCTCTATCAAATAC  
AGATAAAGCGAGGACAAAACGGGACTATACGTCAGGCTTCTGTTTTTGTAAAAAATTGCTTAACTTAG  
AAAGTGGGATATGCACAAAAATCCAAAAGAAATAGTTAGGAAATCCCGCTGAGGAGAACCTAAGAAATGATT  
GCTGTATCTCCTGCCCCAGTCGAAAACGTCCTGAGGATATTCCTCAGAAAAGAAAAGCCCCAACCCAG  
CTTTTTCTCCGAAAAGGCAAAGCAGCACAGAACAATCACAGTCATCGAAGAGTATTTCTTCTTGTCTTTG  
CACCCAAAGATCCCTAACCAAAGCAACCCGTGAACGATGGGTAAAGCTCAGCAGCTAAATGATCTAAACGA  
ACTCTCTTGACTATCATCTGCCTCCGGGTAAAGTTCGATGAACATTCCTCTCCAACGCTGAAGATGTC  
GATCCTTTACCACGGCAACCTCCTTTAGAAATAGCTTCAACTCCGCTTCCAACCTGTTTACAGTCAGAAAC  
AGGAGCCAACCCCTCGAATAGGATGTGCCCATGATTTTGGAAATAACGCTTGTGCTCTAGGTGTAAACT  
GCCCTCATACTCACTTATTTAGGCGAATAAATCTGAAAGTACTATAGACTTTAAGATTATTTCCGCCTAT  
AAAAACCCGATTGACTCTCAAGATTTTGTATTCCTAAAAAATAGTTATGCAGCACACAGTAGATATCCAA

GCTATC GAAT C T A A A T T A A A T T T T A C T T T T T T C T C A T C C C A G A C T T C T T A T T A C A G C T C T G A C A C A T C C T T  
C T T A T A G A A A T G A A T T T C C T T C T G C T G A A G A A G A T A G C G A A C G C T T G G A A T T T C T C G G A G A T G C A G T T T T  
A G G A T T A G T A G T T A C G G A A C A T C T T T T C C T T C T T T T C C C T G C A C T T A A T G A G G G G C T T T A T C A A C A A C G  
C G A G C A G C T C T A G T A A A T G C A G A A G C T T G T T T C G A A T A C A C A C A A A A A T T A T C T C T A G G A G A G C A T C T C T  
T G A T T G G T C G C G G A G A A A A A A T G C A A A G T C A T C G A G G A A A A A T C T C T G C A T A C G T A A T C T G T T C G A A G C  
T A T T T T A G G T G C T G T T T A C T T A G A T G G C G G C C T A T C T C C T G C T A G A C A A A T C A T A G T C C C T C T T C T A C C T  
G A T A A A G A G T C T A T T C T T C C T C T C A T G C T C G T G A A T C C A A A A A T C G C T T A C A A C A A T T C A C A C A A A  
C A C T A A A A G T G C T T C C C T C T T A T A A A G C G T T G C C T T G G A A A T C T G A A G A C G G C T C C T G G T T A T C A T G T  
A C A A G T C T T T G T T A A T G G G G A T C T T T G G G G A G A A G G C T T T G C A G G A T C A A A A A A A G A A G C A G A A A A A C T T  
G C T G C T A A A C A G G C G T T A T C A A C A C A T G A C A A C A A A A A T T A A A A C A C A G T G G A C G T G T A C A G A A T G T G G C  
A C A C A T T C T C C A A A A T G G T T G G G A C A A T G T T C T G G A T G T C C A G T G G A A T A C A C T A G T C G A A G A A A G A A  
C A G C T C C T A A A C T A A C A C A T C T T C T T A C T C C T C T A G C T C T T C T A T T C C C A T A C C A C T A A A C A A T G T G G A  
A T T T C A G G A A G A A A T A C G A A T T C A T A C C C A A G C T C A A G G C T G G A A T C G C C T T C T A G G A G A G G A A C G G T C  
C G A G G T A G C C T C G C T C T A T T G G G A G A G A G C C T G G C A T A G G A A A G T C T A C T T T A C T A C T T C A A A T T T C C T  
C A C A A T T C G C G G C A G C T G G T C A T A A A G T G T T G T A C G T T T G C G G A G A A G A A T C C G T G T C C C A A A C T T C A T T  
A C G A G C C C A A C G C C T G C A A A T C T C T A G C A A C A A T A T T T T C C T A T T C C A G A A A C A A A T C T T G A A G A C A T C  
A A A C A C A G A T T G A T A A C A T T G C T C C A G A C A T A T T A G T T A T C G A C T C T A T C C A G A T C A T T T T T T C T C C A T  
C C T T A A G C T C T G C T C C A G G A T C G G T T G C T C A A G T G A G A G A A A C G A C C G C A G A G C T C A T G C A T A T A G C A A A  
A C A A A A C A G A T C A C A A C T T T A T T A T T G G A C A T G T C A C T A A A T C T G G A G A A A T C G C T G G C C C A C G T A T C  
C T A G A A C A C T T A G T A G A C A C T G T T C T C T A T T T T G A A G G T A A T G T G C A T G C T A A T T A C C G T A T G A T T C G C T  
C T G T T A A G A A T C G T T T C G G C C C A A C C A A T G A A T T A T T A A T T T T A T C C A T G C A T A C A G A T G G A T T A C G C G A  
A G T A G A A A A T C G T C A G G T C T C T T T C T A C A A G A A A A A T T G T A G A A A C T A C A G G C T C T A C C A T T A T C C C T  
A T T G T A G A A G G C T C T G A A A C T C T T C T T G T A G A A G T T C A G G C T C T C G T T T C T T C A T C C C A T T T T C T A A T C  
C T G T A C G A A A A C A T C C G G A T T T G A T C C A A A C C G A T T T T C T T T A C T C T T A G C T G T T T T A G A A A A A A G A G C  
G A A T A T T A A A T T A T A T A C A T C C G A T G T C T T C C T T T C T A T C G C T G G A G G C T T G A A A A T C A C A C A A C C T T C G  
G C A G A C T T A G G A G C G G T G T T A T C G G T G G T G C T T C C C T A T A T A A C C G C T A T T T A C C T A A A A A T T A T A C C T  
A T A C T G G A G A G A T C G G C C T A G G A G A G A A A T T C G T C A C G T T T C A C A C A T G G A A C A C C G C A T A A A A G A A G  
C A T T A T T A T G G G G T T T A A A G G T A T C G T G A T G C C T T T T G G G C A G A T A A A A G G C T T A C C T A A A G A A T T T C T G  
G A T C A A A T T G A T A T T A T T G G A G T A A A A C A A T T A A A G A T G C T G T C C G C T T A C T A C A A T G A C C C A T T T T T A  
G C T G A T T T T T G T T T A G G G A A C A T T C C T T T A C G T T T G G C A T C T A G A C A A T C T T C T C T G G C A G T T C T G C A A G  
C T C A C G A A T G C C T G A G A A A C T A C A G A T A T T T T T C C C T C G A T T A T G G G G A C A G A T T A T C A C C A C A C A A C  
A C A G G G T G A T C T T G A T C A A G A G A C A C C T C T G T G T C T G T A G A A A A T A C A G G T T T T T A C A G A T G A T G T C  
G A T T C T T G G T G C A A T C T G G G C A A T G T G A T C T T G G T A T A C A T T C G C T A A G G A C C T T C C A G A A A A T C C G A  
A G G C A A C G G T T G T C C A T T A C A G C C A G T A T A G A T C C C G A G A T A T C C T C G T A T T T C A T G A A A A A T A C C T  
T T C G A T C C C G T T A C C T C G C C G T T A C G C A T A G G G A G C T C C T C C G T G A G A C G A A A A G A G C T T C T C T C T G  
C T C T A T C C C T C T G C C A T T A T T A C C G A T A T T C G A G G G A C T A T C C A G A C T C G C T T A A A G C T G T T A G A A G A G A  
A A A A T T T T G A T G C C A T A G T C A T G G C T A A T G C T G C G G T G T C T C G A C T A G G A C T A C G T C T T C C T T G C A C A A A  
A A T C C T C C C C C A C C C T A T C A T C C T C T T C A A G G A C G T C T A G C C A T C A C T G C T A G C C G A C A T A T A C G G A G C  
T G G A G A G G T T T A T T C T T A A C T T G C G G C A T C A C A G A A G A T G T A G A A A T T A T G T G T T T T C T T A A C A A A A G A  
T T G T T A A T T A A A A T T A T A A C A C C T C T A A T T G A A G C T T T A G G G T T A G T G T A A A A T C T T T T A A A A G G T T T T  
T T A T T C C A T G T A A A A T T G T A A T G A T A T C C G C C C T A A C G A T T G A T G G G C G A C T G C T G A G A G A C C T A G A G T G  
A C C T A C A G T C A A G A T C T G A A T A C T A C G T T C T C T T A G C T T C A C T G A T A A C G C T C T T C C C A A T G T T T T A A T  
A A C T C C T C T C G T A T C G G C A A C G C A A C T C G T T G A A T A G T G A G G T G C A C T C C G G A A G A A T C T T A A A A A T C T T  
G G T C A C T T G T C T T G T T A A A G A C G G T A A A G A C C T T G A A G T A A A G T T T T C T T A A C C C C C T T G G G G A A C C A  
G T C A G T A A T A T G T A C T G G C C C A T A T T T T T G G A G A T A T G T G T T A T G T C C T C A A T T T C A T C A C C G G G A A A T  
A T T C A A C A C C C T C T C C C A A C A A C T G C C G C C C C A A T C C C C C C A A A A A A C T G G T G G C C A C A G T A A C T T A T  
T G T T T G T T T T G G C T C T G T G C C T G T C A T A G G A T A G G T G T C G C A A T T T A C T T A T G C G C T A G A C G C G C A A A  
T T A T T G G A A G G G T A A C G C A G C A A T C G C A A C T G C C G G T G G A T A G G T C T T A T A A C C A T T G C C G C T G C T T T G  
A T G G T T G T T A T C A C C C T A T A A T C T T T T G T T T A C G A T A C T T A T A T C A G C T T C T C T G C C A A T T A C C A G C T C  
A C T G C T G T G G A A G C T C T C A T C A A A T C G A A A T C T A A G C C A A A A A G C C T T T C C T T T A T G A G G A A A G G G C T T  
T T T A T T C T T T A T T T T T T A A T C A A A A A A A T T G T T C C A T A G A A A G A T A A G C T T G T C G A T A T T T T C G T  
A T C G T C T T G G A G A C T C A T T T A A A C A A C G A A G A A A G T A A C T T T G A A C A G C G T C A T T T T C T T C T C C C A  
C C A G A C A A G A T T A T C T A A A T A A T C A A A T A T A T C A C C G T C C A C A C A T T T T C C G A T T A A A G C T G A C T T A C C G



TATTTATACCGCAACGAGAAAAATGCGCTTTAACAGCAACACGATCCCAGTCAAAGCTAAGTAGCATC  
CCAAA GAATAAATGCTTCC GAATACTC TGCCAGCTCTTCGTCTAGAGG GAAT CTATCATTTAATAGCTT  
ATAAGCTCGCTCTAGATCTCTATTC CATAAATGGGT CTGTATTATATAAACGA GAAT ATGATCGCGCTCC  
TCTTCACTGGCTGGGT CATAGATAGCTTGTAAGATCTATGAAAG ACTCGATCTCTTC ATCC AAAAAAG  
CCTGTATGTGGAAT ATATCC AAAGCATACAACTGCAAAGTAAATG GAGTCTTCATAAAAGCTCTTAGC  
TTTTTGATAATCC TTGTTCCGCAAAGCCTCC ACCC CCTTAAACAAAGAACATTAATTC CGCTACCTTTTGA  
TTGTGTAAGACTC AGG GAAT GTGATTTTCATC GGAT ACGTTTCGCTAAAGCTGTAGAGAAT TGCATAAATG  
CTTCCCTGTTCCCTGAA ACTC CTGCAACATAAAAAATATCTGCAAGCGCTTGATAATCCCGCAATTC CCC  
TGCTCTACGAAATAGTTCGGGAAG GAAT AAGGAAA ATCC TGTCAAAAACTAAGGAAAAGCTCCATCTTA  
GAAGATCTAAACTGCAAAGGAGCCTTATCTACCTGACAGAACAAGGTAGCTTGTTGCTTATGATAAATAA  
TCC TAAGGAAACGCTTCTCCTCTCTAACACTAATCTTTTCTGGAGCG ATCC ACAAATTAACAACAT GAA  
TACTAGCGCTTCGCTGCGATGCTTGTGTAACACTATCATAACAAGCGGAAGCAAAGATGATCTTCTAATCGC  
GGAAT CTCGGGGT GCTGT GAAT ATCTTTTTTAAAGCAAACAACAAACATCGTATCTCTTCTACAAAAC TTC  
CGTTCCCTCTGGTAAACTAACGCTTTGCCAAGAT ATTC CAATGGGGCGCCAGCACCTCCATGAAGATAATC  
AAAAGAACTAAGAGCTTGCGTCAGATCTCCGCCCTGCTCCTCAATTT GAGT TAATAAGGTC ACTC CCAGA  
CGAAACTGCGCTTCATAACTTTCTTTTCT ACCC GGAAAA GAAT CTC GAAT TTTTACGATAAAAGATTGCAG  
CTTGATCATAACAGCTTTTTCAGATAAGAACGCGTCAGGAACAGCTAAACAGCTG ACTC GCAAAGCTCCTAT  
ACTTTCCGAAATCGCAATATTGCTC ATTC CTTGTAATCTT GAAT AATGACGCCTAGACGATTACCTAAG  
CTAGGAAGGTAGTCTATATGTAATAAATAAAGCTTGCTCAACAAAGACTGCG ATTC TGTTGTCTGATT  
TTTTCTATCAAATAGCAAACGATATTGCTGAGAAATCATCTCTTG GGAT TTTTTCT GAAT CTCT ATTC  
ATTTTTGATAAGAGAGACCGTAAGTTCATG ATTC TGACAGAAAACCATAGTCCGTAACCACAGTAAAC  
TC TCCTCTTTTACGCTCCTTAGAAGGTAGGAAAA GAATCC CATTC CTTTATGAAC TGCACTTTTTGTAA  
CGGTAT ACTC CACACGCGTAGAAGCACTTATTTCCACCTCGGAGAGCATAAAATTTATACCATTGAGCAGG  
GGAACCTGCTAGTACAGGGAAATAGCGTGAGAGTA AGGATAGGGT CATAATATTTCCAACACGATTTCTCC  
TTAGCCATCAAAGTAGCTTTTACTGTCC ACTC TGAT CACCC TGAAGATATGGCTGCAAAGCTTGCGGTA  
ACTC CT GAAT AGAAGAAAACCT ATCC GCAGGAT TAATGGCGATTGCTTTTATAGCAATTTGAGATAAAGA  
AGGCG GGAT TTTCCCTATAGGGT GACATCTCGATAGGAGGCAAACAACATCTCTATAAGACAGCTTACGA  
CCTTTTTTTTCTTCGATAAGGGAAAGCTAAAGTCAACATCTGATAAA GAAT GAGCCCTAGTGCATATAT AT  
CC GTTTTTTTCCGATGCTTCTACTC CCAACAAGCTTTCGGGAGCCATATAATCTG GAGT CCCTACAATCTT  
GCCTG GAAT GGT CATGCTG GAAT AGCAGATATTTCTCTCGTC GAAT GAAACAGCAGCTTCATC ATCC TGT  
TCTAGCTTTA ACTC TTTGGCATGTTTAAAGATAGCTGCTCCCAATCAACGATAACAACCTCCCAACA  
AACCC AGTAAGATATT ATCC GGCTTTAA ATCC CGATGCAAC ACTC CTTTGAATGAAT GTATTC CACCGT  
GGCACAATTTTATCAAAAATAGGAAGAAAAGATTTAACAGAGGTTTTTTCTTCTAGTTCTTTAGAAAGA  
ACTTCTTTCTGCCAAC ACTC TTTAATAAACTTTT TAGAGAAA ACCC TTCTATAAAGGCATTGTGTAAT  
ATACAGCCTCACCATCGCTGCATATC GAAT ATACAGGAACAATACT GGAT GTATGAGGCTGCAGCAAT  
TTTTGCCTCTCGCAAAAAGCGTTTTCTAAGCAGCGC ATTC ACTC AGATCC TCTC GGATCC TCTCAGA  
GCC ACTC GACGAGAACACGCTTTGT CATGGGCTAAATAGACTTCGCCATGCCTCCTTTGCCTATCAGCC  
TAATCAATTC GTATCGTTGCAAAAAGACAGCCTCTTTTAAAGCGATGC GAGT TTATCTAAAATGCTTTGC  
AACTC TCTCTGACT ATTC CTTAAC GAGT CTTTTTTAGCTTGTAATAACTAGGAT TGGCGC GAGT ACGAA  
AATCTTCACTAGCCAATAGTTT TAGACACACTATCTAT ACTC TTTTCTAGGC GAGT TTTCTCTTTTCTAA  
ACGTACACGCTCTTTAGCAAGATGTT CAGGAGGAA GAAT CACTC CAACCTGAATTC CTTCTACA ACCC CT  
AAACTAAAATACTGTCTTTGGAGCTTCTGCAAGCTGCTCTACAGTTTTTACTC CTCCCAAAGCACACA  
TGATTG GAAT ACAGAC ATCC ACCAGCTCCTTTTTCTCAGAGCTAATCACAAAAGCTTGTAAGGCTCTCT  
AGGAT CTAATTGCATTTACC GC GAAT ATTGC GAAT CGTATAAACTAGCCTTTCTGCTATGCCAAATG AT  
TCTCGTAATCC TTGTGAAAAGCTACAT GAAT AGGTTTAGGATATTC CGCTACCATAACAAGCTTCAGAAC  
GCAACATGCTGACTGCATGCCCTGT TACAGAATCC CCCTTCC ATTC TCAACAGTTCTAAAGTTGCCTT  
GAGT TTTTGGAAAA GAGT TTCCGTAATATAAGGAACAATT GGAT GTAAT ACTC CCAAATATTGATCAAT  
AAGGTAGCTAAAAGCTTACGCTTAGTTGCTCGCTGTTGATCGCT ACCC TGTTTCCCAAATAAAGTAGGTT  
TAATGATTTCTAGATAAGTAGAACACAATCATTTTAAAGAAGTCATAAGCCAAAGAAGCTATCTTATC  
AAAA GAGT AACAGTTATAGTGCCCATCTATAAG ATCC AGCA ACTC ATTAATCTATCTAAGATATAAAAA  
TCTTCCA ATCC AAGAAGATCTTGGTTG ACCC CTCTTCCAAATCACGACTTGTTA ACTC TGAAAATATGCC  
CGAAAATAAACCGAGCTCC ATTC CATAACTTATTGATAAAGTTCTTAT ACTC TTC GAATAAGCGGTAGTC  
GAGATCAATTTGCTC ACCC CTATTTGCACAAGAACAAGTAAGCCGAACCGCATCAGCTCCATATGCT

TCTATCATCTCAATA**GGAT**CGATAACATTGCCTTT**GGAT**TTTCGAAAGTTTTTCCATTAGCAACTACGT  
TCTTAGGAAGAGCTTCCCTTTATCATAATCACGTTCCGTTCTCCAGAAACATAAAACC**ACTC**CCCTTT  
TTCATCAT**ATTC**CGGATAAGACTTACCGAAAATCA**ACCC**ATGTAAAAAGACATCAGAAAATGGTTCAGTA  
TCGACCATTGCAGAGCACATCAATACC**ATTC**CGGTA**ACCC**AGAAAAAG**GAAT**ATCATGTCTGTCACTA  
AAACAGCTGT**GGAT**AAAACCTCTCAA**ATCC**AACTGTCTTCATCAGGCCAACCAAAACAAGTTAACGG  
CCATA**ACCC**GGAAGAAAACCATGTATCTAAAACATCT**GGAT**CTTGATACCAAG**ATTC**T**GGATCC**CGCATT  
ACCTCTTCTGG**ACCC**CCTTCTCCATCAAAGCAAATTAC**ATTC**TCATCGTGTATTATTATGCCAGACAG**GAA**  
**T**ACGATGCCCCACC**AAAGCTGTCTACTAATACACCAATCTTTTAGATTATTT**ACCC**AAAGTAAGGTA**ATT****  
**CCGTACGA**ACTC**TGGAGGAAAGATAC**GAAT**TTCTTCACTATTTACAA**ATTC**CCGCAA**GAGT**CTCTAAAA**  
**GAAT**CAACAGAGACAAACCACTGTTTTGAGAGATAAGGTTCAATGATCGCCCTGAACGATAGGAA**ACTC**  
CTACACGAGAT**GAAT**ACGCTTCCCTTTTAA**GAAT**AAACCGAGAGCTTCCAAAGATGTGATAATATTTTC  
TCGAGCTACTTCCCTAGATAAACCTGTGAAAATACCTCC**ATTC**TCATTAATCTCTCCGGTAGAAGTCAAG  
ATATTGATCATGGG**GAGT**TGATGGTTC**ATTC**CTGTCTTGTAA**ATCC**TTATCATGAGCTG**GAGT**GATTT  
TAACAGCTCCTGTTCCAAAGATGCGTCTACGGAAAAATCTCCAATAATAG**GGAT**TTCTCGATTACAAA  
AGGCACAACGACTTTGGCCCTATTAAATGACTGTATCGCTG**ATCC**TCAGGAGAAACAGCAATCGCAGTA  
**TCC**CCAGCAAAGTCTCTGGTCGTGTGTAGCAACAGTAAT**GAATTC**CTCT**GAATTC**ACAACCTGATAGC  
**GAAT**GTAGTAAAGCC**ACCC**GTCTCTCTCCTCGT**ACTC**TACCTCATC**ATCC**GCCAAGGCTGTTTGCAAAAT  
**AGGGT**CCAGTTGACTAAATAAT**ACCC**TCTGTAAATG**ACCC**CCTTATC**GAAT**AAAAATTTTAAAAGCCTTC  
TTCACTGCACGGTTGGCGCC**GGATCC**ATAGTAAACCGCTGACGAGACCAGTCACAAGAACAGCCAAGCT  
GTCGCAGCTGAGAAA**GAAT**GACGTTTTGACTTTTTTCC**ATCC**CAAACATGCTTCA**GAATTC**TTCT  
TCTAGAAAATCTGTTCGTGCTTACCAAGAGAAGCTTTTAGATGTCTTTCCACAAC**TGTTGCGTGCCA**  
**ATCC**CAGCATGATCGGTTCCAGGA**ACCC**AACAAACCTCAA**ATCC**TTGCATACGCTTGTAA**GAAT**GAGCG  
TGCTTGCAATGTATTTACAAGAGCATG**ACCC**ATATGTA**GGATCC**CTGTAACGTTGGTGAGGCATCAC  
TATA**GAAT**ATGCAGTTTTCTCACTACTTGC**ATTC**GCTACAAACATACCAGAGCGTTCCAAAAC**GAAT**AC  
**ACCC**CAGTTTCAGAGCTTTTAGGGT**CATACGCTTTAGGAAATTGATCTTCGTT**CATGCCTTACTTCCATA  
TGTTGTGACT**ATTC**TCGCATCTCTAATTAACCGATTGAGCTAT**GAGT**ACGAGGTGACTTTAACGGAGAAC  
ATATTGCCTTTAGAGCTTGATTATGATCAAGCAAGAGGTGCCCTAAGACAAC**TGACTAAAAGCTTTTAAT**  
GAAATTACTTCC**ATCC**ATAAGTGATGGCTCCGACTTAAATTTCTTTACCATCTTTTGTCAAAGAACTT  
TATAAGAAATGATACCTTGGCGATCTTGGTAATCGTTCTCTTTGA**GGT**TATATACCTGATAGCCTGAAAG  
ATGTTGCACATCATAAGAAAATTTGGCAGCCTCTCATTACC**GTAATAT**ACCC**ATACGTGAAGAACCATA**  
GGGAG**GAAT**CTCTAAAACGTGAAGGCAGCCCCAAGTGACAAC**TAGCTGCTGCCCTACAG**ACTC**CGTAA**  
CAC**ATCC**CCGATCTATACCTAGATGAGCTGCAGCTGTATAGTCATTATCTATA**ACTC**TAAAAACGAAGA  
TAATGCAGGTGCGAGC**ATCC**TCTAAACACAGAGCAGAGAACGCCGCTGCCACC**ACTTAG**GAAT**AACAA**  
TAGCGCAAAAACGAAAGCAAATAACGCAAAG**ACTC**AACA**ATCC**CAATCGAAGCAAATGATTACCATAT  
ATTGCAGAGGAACGCGCATAGGCTT**GAAT**AGC**ACTC**ACACAGCACTTCCCTTGCATAAAAAGCAGAAAGCA  
ATAACGCAG**ATCC**TACAGCTAT**ACCC**ATTACGATACC**ACTGACTGCAGAGACTTTTCC**ATCC**TTAATTGC**  
ATC**ATTC**AGCAGTAACATGAAAATCA**ATCC**GTAAT**GGAT**TGTGACGAGGGCATAGCAGACAGACCAATA  
ATCTTCCCGTGTCTTCATCG**ATTC**GAGACATCACTGCGTGAGAAGCG**ACTC**CAGCC**ATTC**CAC**ATCC**AA  
CAGCGTACCAATCATTGCCAAAGCCATAGCCAATACAGGCCCACTACTGATACATCTATCATATATTT  
CCTCTCACTAGACATTTCCCTATTTTTTTCAA**AAAAACGCACAAAAACCTTCTGTATTTAAAGATTTTGCGA**  
CTTTTGATAAAATTACTTTTTTTCAAT**GGAT**GCAAAAAC**TTTCCACCACCATCGAAGCTATAGTGATACC**AC****  
**TC**TATGAAATTAAGGCGTAAACCAT**GGAT**CACACCTCC**CATAATGGAAAGCGCAATATTTACCGTGTGCC**  
CGAAGATAATAATTA**GAATTC**CTACTGCGGGGAAAATCTTTC**ACTC**ATAACCATCACAGT**ATTC**CCAAC  
CATCGTCCAGCTAA**ACTC**AGAGCGTACAACCGCAAATA**GGAT**AAAACGTCTGAAAACACTT**GGAT**AACA  
GCCGTTATCTCATCTAGTCTCTTA**ATCC**CCTTT**GGAT****ATCC**CACCTAAAATGGCA**ACCC**CTAAGCCAA  
TAAACGTTACATAAT**ACCC**TACCA**ACCC**TCTAAT**TCATAAG**GAAT**ATGTAGAGCATAAT**GAAT**TAAAGA**  
TACGGCTTGCAAAATAGATAGGCAGATACATATATGCTCCGCACATAAAGATT**ACCCATCC**TATAGAA**GAA**  
**T**ACCGCTGTCTACAATAGCGTAGC**ATTC**CCAATGACAGATG**ACTACCC**CACTAGCAAAGCTATTTCCA  
TTAAAATATTATCTATAAACTTATCGTAAACAACGGCTTTATATACT**GAGT**CCCCGCTACTAGTACTTTG  
GGCTAGAAGAA**ACTC**TTTAG**GAGT**TTTCTTCTCTTAA**GAAT****GGAT**AATCATGCACCA**ATTC**CTTATA**AA**  
**CCC**TTAGGACGCTCCTT**CAGATAAT**ACTC**CGCTTCTTCAAAGCCAGAAAATGTGTTAGT**GAAT**ACTCC**  
GGAAAGGGCTGGTGTAA**ACTC**ACAGAAACGCCAAAAAA**GGAT**GTTGTAGCTCCTCCCAACACACAC**ATCC**  
AAGCCCTAATATCATAAACATCTGCAGAAAGCGTTTTAATGCTATAGAGCGCTTAATCTGTTCCGAGCT

TTAAATGATAAAAAATAATGATGTTGCTAAAAAACTAATCCATATCCGCGTCATTAATAATCATCGAGA  
AAAAACGAAAAAGGAGAAAAAGACCCATAATGAAGGGTCTTTATCCGTTGATGCAGGAGTATCATAAAT  
ATTAACCAAAGACTCCCTAATGCTCCCAGACCATGATTCCTAAATATGTAGGAATCACCTCATCTGGA  
TCAGGCTGCACCCGTTCTAGATAAATGCCTAACTATCACAAAGTTTCTTCACTTCATCTAAACGATCTA  
CAATCACCCAGCCTAAAGCGCTAAAAACCTTATCATCAAACAGATCTTCTGCACTAGCTTCTGCATGCTG  
TAAACTTTGTTTCATTGCATTGTTTCACATAAAGCCTCTAAAAGATCCCTCTCGATAAGCATATAACTCACAA  
ACTCGAGCCTTCTTTTACGTAAAAAGAGCTTGAAGATGCCCTGCCCTCTCTTAATTCATTGACAGAAC  
GCGGCGCCTCTATCTCAGTAAAGATATCCCTTAGACAGAGAACTATCCCAATCACAGCATAGTAATCATA  
GTTGTACGCTGTTGCTAAGTAGAAAAATTCTCTTCTCGACTTCTAAAGGAGCTCCTTCTATATGTCTC  
TTATAAAAAAATCGAAGTGTAAACCTGTTTTTAAAGTCAACTCTCGGATTTCTTTCGGATGAAAAATCTC  
CAAGAGGCTTAATCGAAGTATTTCTTTACCTAGAGCTTTTAAAGACTCTGTAAAGAGTGTAAATCTCCTG  
ATTAAGATCAAAGATCTCTTGAAGCAACTGCTCTGTTACCAAATAGCCTGACTTCGTTGATACTAAATCT  
GCTGGGGAACAGCTCTTAGTTAGCAGATTTAAAACCTTTAATCCCTCAGAAAAGCTTTCGTACTTTTTCTG  
AATCTTTGAGTTTACTTTTTGATAAAAATTCGACAGCCCAATCTCTCGACATGCAGAGAAAAATTCAGA  
CTTCTTACGTCCAATAAATAGATATTTATCCACATCTACGCGCATGCAGACTACTCTTATGCTGCTGAA  
TTTTTTTTCTTAGCCATTTTCATTTGTCCCACATCAGTAATACTTCTATCACTTAAGAAAATGGCTATCTT  
TTTAAAGAGTTTGCGAAGTTGTAGGTATGAGTTTTTCTCGAAAAGTTTACTCGAATAGAGACTCTCCGA  
AGTCTTCTTCTAAAAGCAGCAGTCGTTCTTGAGCATTCCTCAGCATAAATCTTACTCACAAATATTCCTT  
TTACAGATGCAAGAAGAAGTCTAACCAAATAGGTGTATCCAATAACGAATACTCTGGAGAAGTAAGTAC  
AACCCGCTTTAGTAAGGGGACTTCAACGCCTGCGATATTCCTCGACATCCCTTTTCAAGGATATCGACAGAA  
AAACACTGCTCTACTGCATCCGTATAGAGAGGAATGCTGAAAAGCTCGGCAAAGCGTACATTCATCTC  
GAGCTTGTTCATTAGTCGCTGTACTTCTGCGACTAAACGGATGCGAGATTGAACCTCGGCCTGTAACAA  
AGCTTTCTTTAATTTAATGTGGGCAAGTACATGCCAACATATTAAGCTTTTGTTCCTCAGCTCTATAT  
GAATTTTTCTGTTAACTTTATTTGTGAAGACATGCTTTAGGCCAATATTTCTGAATTAAGTCTCTTTAAT  
TCGACTTCTTCAAGAACTTTGAGATAAAAATTTCCATCCATATATCCAAAGCTTCTTCAAGAGGA  
ATATTCACCTTCTAACTCATTAAAGCGAGCCTCAAATAATTCAGAAAACGCTAATAACTTTTTATCCCAAT  
TAGAGAGTTTGAACCCATAGACATCCGCTCTGCAGACTTTCTAGAGTCTGCGTAAAGACGAATCAAAGC  
ATTTGCTAAGTCACCATGATCCCTCTGAGTCTTCTTACCAATAACCAACTGCTTCAGTCGAGATAATGAG  
CCAAAAGGATCTATTCGATTGTCTTTCAAGTAGAAGTGTCTTCTGTAATAAAAACCTGTATTGTCAGGAA  
CTGGATGTGTGATATCATCCCCAGGCATCGTAGTCACACTGATCAAAGTAATTGATCCGCCTTGAGCAAT  
ATCTACAGCTTTTTTATAACGAACAGCGAGATCGGAATATAAAGACCCGGATATCCCTATTTGCTGGA  
ATCTGGTCCATTGTAATAGCAATCTTTCAATGCATCAGCAAAGCTGTCCATATCAGTAAGCAGAACCA  
GGACATTTTTCTGCTGTTCCAATGCAAACGCTCTGCACAAGCTAAAGCCATATCTGGTATCAATACACA  
TTCAACCGGAGCATCTACGGCTTTATGGATGAACCTAACACATTTATCAGCGAAACCTAACCGCTGAGAT  
TCCTCGACGAAGAAATGTAATCAACAAATGTTAATCCATCCCTCCAATAATTACGATATCTGCATCTG  
TTTGAGCAGCAATACGCATCAACAGCGCATTATGATTTTCTCCAGAAGAGGAGAAAATCGGAATTTTTTG  
AGATTTGACCAAGCAGTTGAACATATCAATCATCGGTATGTTGTTGTTGTTGTTGTTGTTGTTGTTGTTG  
CGACAAACAGGATTAATGAAGGTGTTGTAATAGGTATAGGCTCACCAAACACTCATCTTCATGATCAA  
TAGGTTTTCTGTTCCATTAACGCTCGACCTAACAAAGAGTCTCCATAAATGACCTCCATGGGTCTTCC  
TAAGAAAATCACTTGTCTCCTGTAGACAATCCAGAAGTACCACCGAACACTTGAAAGTCACTTTTCTC  
GCATCGAAACGCAAACAGAAGCATACGATGAGCGCCATCAGCTCTTCAATCTGCACTAATTCACCTA  
AAGAGGCGCCTTCTGCCTCCACAGTAATCAAGTCCCCTTGATATCCGTAATTTTTGTATATATCGTTTG  
CATACTACGCCGCTGCACCATTTTGCTTTCTAACAGTTTATAGATTACTTCCAGGCCTTTCTGATATT  
CTTCAGATAGGAATTTCTGACCATTCAGCGTCTTAATTTTACTTTGGAGCTCTAAAAGAAAAGTGGGGC  
GTTATCTGGACAATCGAAACGAATCTAGAGTTAAAGATGTGATTCATCAAAGAAAAGAGCTCTATCTGC  
CGATCAAATGGACAGTAGCAGTCTCAGCATCAAATGCGTTTTGCTGCAAATAACAGAAATCGTATAGCT  
CTGATTTCAAAAAGATTTCCATGTCTTCCATAGAAAATCCCTTCTTCCCCTACGACTTCTATTCGTTTACC  
AATTTACAGACCTTCTTCCAAGAAGCGGGAGGCTTGTTTAACAGATTCCTCCCAACCCGGAACCTTTTTTC  
TCTAAAATTTCTGCTACAATCCAGATATTTAGACCATGAAATCATTGGGTCAATAGAAGGATATCTTC  
TTGCATCTGCACGCGCTTTCGAAAAGACCACAGAAAAGCTCCAACCACAGATAAAGTTGCTTGTGTAACAGG  
CTCTTCGAAATTCCTCCTGCAGGCGAAACTGCTCCACAGATAGTCAAAGATCCCTCCGACCCATCCCTTC  
ATTTTTACAGCCCCACCTTTTCATAGAAAGCGGCTATTCGAGACGCTAAATAGGCTGGGAAAAGCCTCTT  
CCCAGGAATTTCTTCTAATCGCCAGAAATCTCTTTAAAGCCTGTGCCATCTAGATGTCGAATCAGC

CAGTAACAAAATGTGCAGACCCATCTGACGGTAATACTCAGCAATTGTAATCCCAAATAAATAGAAGAT  
TCGAGCAGCTACAGGCATGGAAGATGTATTACAAATAATACAAGTTCTGTGCATCAAAGACTGCCCTG  
TATGAGGGTCTTTGAGATGAGGGAATCTCTGTAAGATTTCTACAACCTCCCCGCACGCTCTCCACAAGC  
ACACAAAACACTACAATGTCTACAGCAGCATATTTGGATAAATGGTGTCTGCAATACCGTTTTCCAGCTCCA  
AAAGGTCCAGGAGTACAGAACGTTCCCTCCCTAAGAACCGGAATTTGTGTATCTAACACTCGCAACCCTA  
CATCCATGATCTCGTGAGAAGGAACTTTCTCCCTTCTAAAAAGCTTGCTTGATAGGCCATTTCTGAAC  
CATAGTGAATCAAGCTCTTACCTGTTGAAGTACGTCCCTTAGCAACAACGGTATCGACAGTATAATTC  
CCAGAAGAAATCAACCATGTGATGGTACTTCTCAAACAAGAGAAAGGCACCATAATCTTGTGATCAA  
AACGACCTTCTTTTACCGTTCCAAGTACATCTCTCGAGAAAGTACAGATCCACCGAAGCTTTTTGCGT  
ATAAGCCATACTGTTTCTCGACAAAATGGCATTAACTGATTCGCCTTCTCAAAAATAGGCTTGTATCT  
GCCAATATTTCCAAGCGATTCGTAAACCATCAAAAATTCCTTGAGTAAACCGGGCCCTAATTCAGCTT  
CTAATAAATGTCCGAAAAAGTTACCAAGCGCCACGAGAAATTCCTTGAGTCTCTCAAAAATTCGGAT  
CTTAACCTCATCCCTACGACTTCAATAATTTCTGCTTTCAACCAAGTATTGTCTACGCTAACATAGGCC  
ACTTCTCCCTGACGCACATGCCCATCAACATGCAACCGAATAAATTCCTCGTAAGCTTCTACGACATAGC  
CCTGCGTCGTTTTGTTTTGAAGTTGCTACCATCTGATTCCTTTCTCCATCAAATTAATCAGTTCTTTCCCC  
TTCTGAACACTCGCCCAACTACTACGAATGGCCATTAATATGTAGTTACCCGAGAAAGAATGTCATCTG  
TGTTAAAGTATTTGTCTCGTGACATCTCTTCTACCTTATGAAATTCATAGAAAGAGAAGTCTGATTCAA  
CATGTGTGGAAGACGCCGTAATCTCTAAAACATCTCTCAATTCGAAAGAATTCATCAGGAAGCTCATAA  
TTAGGAGAATCTTTTTGTCATCAACACATGCAAGACAATGGGATTCGAACATCTTCATCCCTAAGGACAA  
AAGACACATCTTTCTGCATTACTCTAGCTCGAAACCCGCCAAAATAATTCGTAAATCTTGTCTAAAGCG  
AAAATAGTTCTAAGAAATTCGTAAAGGATAATCTTGATAGTGATCGAGAAAATCTCTAACTAACTCTGAG  
AAATGCGTTAAACGCTCTCGAGGAGTTTTATAGCGCAACAGAAAATCTTTAAAAAAGTCTTCAAACCTCC  
ACTCATCCGACCACATTTGAAGCCGCAACAAAGACTCACATTACTATTTGTAACGGTCCCAAAGAAAA  
GGGAATCGATTTCCCTGCCAGAAAAAGCAAAATTTTCTAAATCAAAAAACCGCGCAATATTACGTAG  
GACCGCAATCTTATCTGTAAAGTTTAGCGCTAATAAATCATTGATTTCTTGAAATGAATAGAGAGGAG  
AAGATTCGGGTGTTGAGGAGAAAGGAAGGAGATAAAAATAAATACTGATTCATAACGCGCTCTTACAC  
CTTCAACTAAGAAACTCTCTAGAAAGTCTCCAGAGATAGTTCTTCTTTTCTCAACGCATACAAAAAGC  
TCCGCGAACTCGGAGCTTCTATCGTCAACGAATTTCCCAATAACGATTTAAACAACATAGCCCCTTAAG  
CCAAAGATCTTTAGCAAGACTGAAAGATCATTCCCGAAAATCTTTCTGTAAAAATCTAGTCAATAAAT  
CTAGCAAAACCTCTGAGCTCATATCTAAAACCCAAATGCGCTCTTCAACTTTTAACTGAGCACCTCCAGA  
GAACCTGCCAACAGATACCCCTTCTCTTTGAGTTTAGAAGTTATCTCTTTCCCTAAAGCCTCATTGACA  
GCTCGAGCTGACACATGTTTTCCCTATATAGGCAGAAAGATCCAGAAATCCCTGCGCATCAACTGCCT  
GTACTAAAGCTGCACGAGCTTAGCGCTGACTTCTGGATCTGTAGCCACATGATCTAACCATTCACCCAA  
AGACTCTGAAGATCTTCGTTTCTACTGCCTCAAGTTTCTAAAGAACGCTTTCCTGCCTGTACC  
AAAGCCGCTCTCTTTTTTCAAGTTTGGTCAGCTGTCTCTTCCGCAGAACGAATAATCTTTGCGCCT  
CTTCTTGGCCTCTCAACAATACGTTTTGCTTGTCTCTTGCATTATGAACAATAGAACCGGCTTCTCT  
TTCAGCTGGTTTTAAAGTTTCTCTCGCAAAGCATCACATATTTGCTTAAATTTATCTTGAGCGCTGAGA  
TCTGCCATATCTGATACCAAGAAAAACAACGTTTATCTTAAAAAACGATCGATTATGATCCGGTTAAC  
CTTAAGATTAGATCATAACAACGTTTAAATCAAACACTAAACCTTATGAAAAGAGTATCCCTCTGCTCT  
CTTTTATTTGCAAGTTTCCCTATAGTTTGAAGGCAGCCGAGAAAGGAAAGCCTTCTTAGAGCTGCTC  
AATTACGAGAGAAACGAAAAGATCTCCATGTATCAAGGAAACCTCTCCTCGTTATGCTTTGAAAAACG  
TGCTTTAGAAGCTAAAAAATAGGCCTTCTATTAGCTGGATAACCTATTCATGCTACCTATTCCTTT  
CTTATCCCTAATACTTGGCAATGCATCGATGATAAACGCAGCTACCGAAAAATTAGATGTTCTTTTCA  
TTGGAAGGGGAGCAGGAGGACTGACGCCAACAAATCAACAGCGCACACGAAATCATCCATAAACTGAAGA  
TGCTTATATTGAGGAGATTTTAGACTATCATCGCGCAATGAGAATACACTGGAATCTTCTATCTTTGCG  
CACATTCAGCTCCAGTGGCAAAATTTACAATTATCAAACGGAAAAAACACCTCTTGGGGACGAGTCT  
TTTGCTCCAAGGTGTGACAGTCATTGATCACACAGCCTACATCTTACAAGCACGTCTACCATAGATGA  
CTATCCCAACGTCTCTTAGCTCTTCTAAAAGCAGCCTCCTCTTAAAGCTCTCAGAAAAAGAAGAAGCT  
GCTCGTGGTGATGCTATTTTAGAAAAAGCTTTGAAAGATCTGCAAAATGAAAAATAGCGGAACGCTATCC  
TCTATGATACAAGACTTCTCCTCGCAAAGAAATATAAATCTAACTCGACAAGTTTACCCGCTAGA  
TTCAAATTCAAAAAACAGGGAATCGAGAAAATAGCAGCTGAAAAGGAACGTCAATACTTTGGCCTTGAA  
CAGAGACCGAGACCGGGCCTCACCGAGGAGGGCTTAGCTTCATAAATTCATAAACAAAGAGCAGAGAA  
TCGTCTAATAGCATCACACATCTCAGCATCAAACATAAATGAAGCTTCGCAGCAATCACACACAAGACAA

TTTTCTAAATCAATTACAGAAAAAGCTACGTTCCCATCACAAACATACGGACAAGAAAAACATAACGCCT  
GTTCCTTTTTTTTCCATGACATCCTTTTTTATTC AACACTGCCCCACATTATCAATATAAAACTATGCTTCC  
TGGGCTGCGATCTGTCTAATAAATTCGGTAACTGCAGACTCTAAAATTTGAGTGTCACCAGAAAAGATGC  
GAATACCTTCAGCTAGCTTCTCTGTTGCCATGGCATCTTCATTCATTAAGAACCGAAATACACTCTCTGA  
CAACTCCACAGGTTGAATATCTAATTTTTTTCGCTTCTTCCACGCTAAGCTTTCTTCAACAGGCTGCTGA  
TCTTTCTTGAAGTCTTCTAATAATTTAGGAGAAACCGTTAAAAAATCACATCCGGCTAAAGCAAGCACTT  
GCTCTTTCGTCCTAAAAGAAGCCGCCATAATCTGAGTTGGAATATCAATTTCTTATAGTAAAGATAGAT  
ATTTGCTACGGAAGCAACTCCAGGATCGGCTTCGATAGAATACCCTTCTGCGCCATAAGCAGCGATCCAC  
CAATCATAAATCCGACCAACAAAAGGTGAGACCAATGTTACTTTAGCTTTTGCTGCTGCGATCGCTTGCA  
CAAGATTA AAAATTAAGTACGTTACAAGCAATCCCTTGACTTTCTAAAACCTCTGCAGCACAGATAACC  
TTCCAAGTCCCAGGAATTTTAACTAACAAACGTTTCTTATCTCTCCATTTTCTCAATAGTTGAGAC  
AAAAAATCGCTCGCTGAACCATTGCTTCTGTATTAAAAGAAAGCCGGGCATCAATTTCTAATGATACCC  
GACCAGGAACATGCTTTAGAATCTCCAAGCCTAAAATTAACCTGGATCTTATCTAAAACAAAAGTCAGAGT  
TTGAACATCATCACCATTCCTGCCGGATGCCCAAGAAATGGCTTCCGTCAGCATCGACTGGTACTTAGGC  
TCTTGAGCAACCTTCAAGATCAAAGAAGGATTTGTCGTAGCATCCGTAACCCCTAACGCTTGATTAAAG  
CGGGATCTCCAGTATCTCCAACAAGAACACTCCAAAGCTTAAACTGATCGAACTGGCTAGACATAAACAC  
CTTGTC AATTTTTGACTCTAAGTGAAGCCTACCAAAAAAACGATACTATTC AAGGGGGTTATGACTCAT  
ACCCCTCTCTTTCTCTAGTTTTTGGGGCAGATCTTTAACCTGCCACAGACTCAAACCTCGCTGTCAAAT  
CAAAGACCAAGTCTTCTTGCTCTTTTTCAAGATGTTGCTTAATACGCTTGTGCGTATCAAATCCGTGACC  
TCCAGGAATCATATGTCCCATGATCACATTCCTTTGAATCCTAACAGATAGTCTGTCTTACTGCTGCAA  
GCAGCGTCTGTTAAGACCCGAGTCGTATCTTGGAACGAAGCAGCAGAAATAAAGACTCAGTTCCCAAAG  
AAGCTTTAGTGATTC CCAACAGCACTGGAACAGCTTGAAGCAGTTTCCCTCCATCTTCTTCCGTGCGACG  
GTTCTTTCATAGA ACTCTTTCTTATCGACATCTTCTCCAACAATAACGTCGTATCACCTGGATCAGTA  
ATGCGA AACTTTCTGCAACATCTGACGAACAATAATTTGATGTGTTTGTGCTTAATGTCTACCCCTTGTA  
GGCGGTATACTTCTTGA AACTTCATTAACATAAATATTTCTGAAGCTCTCTAACACCACAAATCGCAAAGGAT  
CTCATGTGGAACA AACTAAACCATCCGTCAACTGCTGACCTTTGATTACGCTATCGCCTCGTTGTACGATT  
AAGTGT TTTGGTTAGAGAAATCAAATGTTCCCTCTTCCATTC CCGTAATCTCATCTCGACAACAAGAAATAC  
GCTTGTCTTCTTGAATGCCTTTGAAGTCAACAACCCCATCAATCTTAGCGATATCAGCAGCATCTTCAGG  
CTTACGAGCTTCTACTA ACTCGGCAACCCCTTGGCAACCTCCAGTAATATCTTTAGTCTTGATAGCCCT  
CGAGGCAATCTCGCTAAGAGCATTCCTGGAGCGATACGTTGACCTTCTTCTACGGAGATAATTGCTCCAG  
AAGGAATAGCATACTACCGACCAACTCTTTATATTTGGCATCAGCATATATAGCGATCTGAGGATGTAA  
TTCCCTCTGTGCTGTTTTACGATTA ACTCAACAAGCCAGTATTCCTTATTCGCGACCTTCTCTGTGGAG  
ACTCCCTCTACCAAATCTTCGTAATGAACGAATCC TGGCTTATCACAGATAATTGGGATGTTATGAAGCT  
CTACCTCAGCAATTCCTGTCCCGCTGTAACAGCAGCACCATTAACTAAAATCTTAGCTCCTAATTC  
CACAGGGAATGTTGCCAGACTTTCAATAGACTTCGTACTCAAGAGTTTCTTATATTC ACTTAAAGCTTCGT  
CCTTCGTCTTGA ACTAAGTGAAGAGCTCCCATCTTGTTAAGCACAAGATTATTACCCCTTTGGTCTACGA  
CAACACGCAAGTCTAGGTA AACAAGAAATCCATCGCACTCAGCAACGATCTCTGAGTTGAGGATGTCGC  
AGCAACCC CCCC AAGGTGGAACGTTCTCATTGTTAACTGAGTTCCAGGTTCCCAATGGATTGAGCTGCG  
ATAATACCAACGGCTTCTCCTAATCC AATCAAATGACCGTTAGCGAGATTC AAACCGTAGCATTTAGCAC  
ATACTCTCAGCAGACTTTCACAAGTAAAGAGTGAACGAATCTTACACTTTCAATACCAGCGTCATCAAT  
AGCTTCAGCTTGAGCAGAAGTTAATACATCGCCAGCATATGCTAAGACGTTGCTCTTATACCAGGCTGA  
TAAATGTTTTCGGAAACCGTACGTCCTGTAACACGATCTTTTAGAGGCAACAGTTCTTCAGAACCC TGAC  
GGATGTGCGACACCTCGATATGATTTAAAGTACCACAATCTCTCTCAGTAATAATGACATCC TGAGCGAC  
GTCTACTAAACGACGAGTCAAATACCCGGAATCCGCTGTTTTAAGCGCGGTATCTGCCAATCCCTTTCTA  
GCTCCGTGAGAAGAAATA GAGTACTCTAGAACAGTTAAACCTTCTCGAAGTTCAAGTAATCGGAGATT  
CAATAATGGCTCCGTTTGGTTTAGCCATTAGTCCCCGTAAAGCACCTAACTGTTTTAACTGAGATTTATT  
TCCTCGAGCTCCA GAATCAACCATCAA GAATAGCGGAT TATGTTGCTATTTGTTTGTCTTGATCTCA  
GAGTACAAAGCATTAGACAAGAGGTCGAGACTTCAGTCCAAATACTGATCGTTTTGGAATGCCGTTCCC  
CATCAGTAATAATTCCTGCTCTGCTACTGTTTTCTTAACAATAGCAACCTTGTGCTAAGCATCTTTAAGAT  
TTCTTTCTTGATTTCAAGGAATCTTAACTCCCTTCAGACCCATAGAAATCGCAGCTTTCGTAGATTGTACA  
AAGCCTAATTCCTTAAAGATCGTCTAGGAAGCGTACAGTAGCTTCTAACCCAACTTTCTTATAGCACTGCA  
GAATCAATTC ACTGATACGCTTACTTGGCATGCTATAGTTTTGGAAACCAAGTTCTTTAGGAACGATCGT  
ATTGAAAAATACACGACCAGGTGTTGTTTCAATAATCTGACCATCTATTCGA AACTTTAATTTTCTCATGG

ATGTGAATCCCTCGTCCAGTTTCATCTCGACGAGAACCACAGATCTCATCC TTCAGAATAAACCC TCCAG  
CATT CAGAGCTCGAAGCACTTCTACTTCGTCTTTAAATGCTTTTGTTCCTCCATGTTCTTCAGGGAA  
GTAGGTTGGATCAGCCATTAATAATAGATAACC AATGTCATATCC TTAGAAGGAGT TGCAACAGTTTC  
CCAGAAGATGGCAAGAAAATGTTGTCTGGAGCCATCATCAAGACCTTAGCTTCTAACTGCGCCTCGATAG  
AGAGCGGCACGTGAACAGCCATTTGGTCTCCATCAAAGTCGGCGTTGAATGCTGCACATAACCAGAGGATG  
GACCCGAATAGCCTTCCCTTCAATCAATACTGGCTCAAAGCCTGTATTCCTAATCGGTGCAAAGTAGGC  
GCTCGGTTTAGTAAAAC TGGATGCCCTTAAATTATTTCTTCAAGAACATCCCAAAC TTCAGGAGCTCCCC  
GCTGAATCATCTTCTCGCTGAACGAATAGTATAAACACTACCC TGATCTTCAATCGTTTGATAATAAA  
TGGCTCAAACAATTC CAGCGCCATTTCCCTTAGGCAAACCGCACTGATTAATTTCAATTCAGGGCCAACA  
ATAATCACTGAACGTCCGAGTAATCCACTCGTTTACCTAACAAATTTTGTGCGAAACGCCCGTTTTTCC  
CTTTCAACATCTCTGACAAAGACTTCAGAGGTCTATTGCCAGCTCCATAACA GGATGTCCGTGACGTCC  
ATTGTCAAACAGAGCGTCAACAGCTTCCGTCAACATCCGCTTCTCATTGCGGACAATGACCTCAGGAGTT  
TTTAGCCGTAATAAGCTTTTAAAGCGATTATTC CGGTTAATAACCC TACGATACAGATCATTTAAGTCTG  
AAGTAGCAAACGCCACCATCTAAAGGAAC TAAAGGACGTAATCTGGGGGAACAACAGGGATGTTCTT  
CAATACCATCCATTCAGGACGGTTCGAAGAAGATACAAAACCTTCTACGATCTTCAGACGTTTAGCAAGC  
TTCATTC TCGCTTGCTGAGATTTTCGTTTTTCTTAAACGATCTTTAAGCTCTCCTAAAAGGCTTTCCAAAT  
CTTCAGATTTGAGAAGATCATAAACAGCCTCTCCTCCATTTTGGCAACGAAAGCATCTTTACCCCATTT  
TTCAACAACCTTCTCGATATTTTCGCATCATTGAGAAGTTGTTTTCTTCACGAGATCAGTATTACCTGGATCG  
ATAACAACATATTC TTCGTAATAAAATTACACGCTCCAAGTCCGAAGCGGTCAATTCCTAAAACATTTCCGA  
TTC TTGAAGGAGTGTTTTTGAAGAACCATATGTGAACAATAGGAACAGCTAACTCAATATGAGCCATTC T  
TTCTCGTCCACTTTAGAAAGTGTGACCTCTACTC CACAGCGGTCACATAACAATTCCTTTATGTTTGATC  
TTCTTATATTTACCGCAATAACATTC CCAGTCTTAGTAGGCCCAAATCTTTTCGCAAGAATAACCCG  
CTTTTTCAGGTTTAAATGTACGGTAGTTGATCGTCTCCGTTTCTTAATTTCCGCCACAAGACCACTTGT  
GCCGAATAGTCACATCTGAAGCAATCC CAATTTCTAACTTATCAAACAGCCCTTCTTTTACCAGGGCTGCA  
TCGTCTCGAGAACCCTTCTCTGAACATTAACCTTCTCTCCAACAAGTGTTTTTTAAAGCATCTACTACCATAG  
GGCGAACATCAAGCCCTAGACCTTGCATTTCTTTAATCAAACATTTGAACGACTCAGGCGTTCAGAACG  
AAGTAAGTTTTCTCCTTTAACGATCGATTCGTAGATACGAGTCTTCCC GAAACATCGTCGGACTTAACA  
GTTAGGATCTCTTGCAACATATGAGCTACCC CATAAGCTTCTAAGGCCATACTCCATTTCCCCGAATC  
TCTGTCTCCCATCTGCGCTTACCTCCAAGAGGTTGCTGCGTAACGAGAGAGTAAGGTCTATAGAACG  
AGCGTGGATCTTATCAGCAATTAGGTGACTCAATTTCAACATGTAGATGTATCCAACGACCACTTTGCTA  
TCGAAACGCTCTCCGTTTTTACCATCAAATAGATAAGACTTACCATCTTCAGGCAATCCCTGCTCTATCA  
TCATATCCCAAATACGGGACTCTGGAAACCTTCAAAGACCGGAGTTTTTACATAGATACTGCGTTTTT  
TGCAGCATATCC TAAATGTGTCTCTAAAACCTGTCCAAGGTTCAATTCGAGAAGGCAACCCCTAACGGGTT  
AAAATCATCTGTACTGTTTACCCTTAGCTAAGAAAGGCATGTCTGCTTCTGGAACAATCTTGGAACCA  
CTCCTTGTTCGGTGACGTCCAGCCATTTTATCC CCAACTTGAAGTTTTTCTGCTTGGAAAGCCACGTAAC  
TTTAACTTGTGAGATACTCATGATCTAAGTCAGCATCACCTCTTTTATGTGCTCAGCTTCGGTTTTTA  
TAATGACTTCCAAACGCTGAACAGCTGTTTCATAGCTAGAAA GAATATCTTTCAAACATCATAATGT  
CACAAGGAGCAATCAGCAAATCAACTAGCGACTCTTTCTAAAGAGTTCGATAGTCTCTTGATCAAAAAT  
AGCACCTTCTTGAACCAAATATCTGCCGAACGACGGTGTACAATCGCTGCAGGAGCTTTTTCATTGAGC  
AATAGAGCCCCTAGTTTCTCTCTATGTTCTACTTTCAATTGAGCCAAC TACTTATATTCCTTCTGTA  
GATCC TTAAGATGCACAGCTTCTTCAACCAGTTCATCATCGCTCTTGGACAAGCGATCCCTTCTGCTGAA  
TACTTTGACATCCATTACGACTCTTCTGTACCAGGAGGAACCGTTAGAGAGGCATCTTTTACGTCCGCC  
GCCTTCTCTCAAAAATAGCTCGCAACAACGCTCTTTCAGGAGCTAGTTCGGTCTCAGATTTTCGGAGTGA  
TTTTACCAGCAA GAATATCTCCCGCTTGACTTCAGCTCCAATACGGACGATACTCCCTCTCCGAGATT  
TGCCAAAACCTCTTCAGAAACGTTAGGAATATCTCTAGTAATTTCTTCTTTACC GAGTTTTGTATCTCGA  
GCTGTTA ACTCAAATTCCTTCTATGTAATAGAAGTGTACGCATCTTGTTAATCAACCTCTCGGAGATGA  
TAATCGCATCTTCGAAGTTATACCCGTACCAAGGCATGAAGGCCACTAATACGTTTTTACCAAGAGCCAA  
TTC CCCCTTATCGGTTGCTGGGCCATCCGCTAAAACATCTCCATGCGTAACCACATCTCCACAGAACAC  
AAAGGAGTTTGGTTGATGCATGTTCCG GAGTTGGATCTTAA GAATTTTTTAAAGCTGATAACGATCC TTA  
GCGTTGGATTATTC TCTTCGCTACGACAATCTCATAGCTATCTACGTATTCGACTACCCCATCTTCCGT  
AGCCACAATAATAGCTCCA GAATCTTTGGCAGCACGTCTTCTAATCCAGTTCCAACAATAGCAGCTTCC  
GTTTTCAATAATGGTACAGCCTGCCGTTGCATGTTCCGATCC CATAAGAGCTCGGTTAGCATCGTCTGTT  
CCAAGAAAGGAATCAGCCCCGTAACCACAGATAACCAGCTGTTTTGGAGAAACGTCATATGCGTAACCGT

ACTTGTGTCGGCTTCAAAGCCTCTCCTTTGTATCTAGCCAGCATAACAGGAGT TTTAAACATATTATAC  
TCATCGAGCTCCGCAGAAGCCTGAGCAATGACACACTCTTCTTCAACATCTGCTGTCATATACTCAATTT  
CATCTGTCACGATGCCATCGCGCACGACACGATAAGGAGTCTCTATGAATCCAAATTCATTGATCTTAGC  
AAAGGAAGATAGTGAAGTAATCAACCCAAATGTTTGGTCCTTTCAGGAGTCTCAATTGGACAAATTC TACCA  
TAGTGGCTTGCCTGAACGTCTCGAACTTCAAACCCAGCTCTTCTCTATTCAATCC CCCAGGTCC TAATG  
CTGACAGACGACGCTTGTGCGTCAATTC TGCACAGGGT TTTGCTGATCCATAAACTGAGATAAATTGAGA  
ACGGCTGAAGAAATCTTTCAGGACACTGACTAAACCC TTTAGCAGAAATAATCTTTCCTGGAGTTAGGGTA  
TCAGAAGAGAAATCAAAGAGATTCATTC TTTCTCGAACGATCTTTTCCATTC TAGCCAATCCAGAACGAC  
AGTGATTC GAAT TAGTTCTCCAACAGAGCGAACTC GTCGGTTTGCCAAATGGTCAATATCATCGATAGA  
TGCTTCTCATCGCCATTCGCAAACGAATCAAATATTTCAACGCGCCGATAACATCTTCTTTTCTCAA  
GTCACTTGAGATAATGTTTCGTCGTC TAATGGGAAGCCTAATTTTTTATTTAATTTATAACGTCCAACGC  
GGCTAAATTATAACGTTTAGCATCGAA GAAT AAACGCATAAATTGTGGATCGAGCATTAGCTAAAGTTGC  
AGGCTCTCCTGGTCGTAATCTGCGATAAAAATCTTTAAGAGCAGCTTCGTAA GAATCCGTAGGATCTTTT  
GCGAGCATCTTAATAATTGGGT GATTTTCATCTGCGCAACAGCAATCTTCAAAGATTGGACTCCCGTAT  
CTAAGATGCGTTTTTAGCATAGCAGTACTTAGCTTCTCTCCAGCTTTCCTGTAACCTAATGAAGAATCCGC  
ATCAACTACGTTATCAGCTAAAACCTTACCAACTAACGCGACAAAATCCTTCTCTGAACGTAAGGAACGC  
TCCTCTACAGAAAAGA ACTCTTCAATAATATCTGCATCTGTTGAATATCC TAAAGCTCGGAT AAACGTCA  
TAGCTAAAATCTTCTGCGACGTTTTTTTCTATCAATATGGATATAGATAAGGTCATTAATGTCGAAGAC  
AGCTTCTAACCAACTTCCCTCGATAAGGAATAATTC TAAAAGAAAATAAAACATTTCTTTTGAATGTTTT  
TCTTGTTCAAAATTGATTCCTGGAGAACGGTGGACTTGAGAAAACAAGACTCTCTGCCCCATTAATAA  
TAAAAGTTCCCTTATCAGTCATGATGGGATGGTCCCATATAGACTTCTTCTCTTTAATCCCGTTTT  
ATCAGTTAAACGGAAACGAACCTTTAAAGTAACACTATAGGTGATTC CCGACGAATACACTTCTGGG  
GAGTATTTGGGC ACTCTTAAGTTATAAGAGAGGTACTCTAAAATCGTAGCTTCATTATAAGACTTGATAG  
GGAAAATTTCTCTGAAGACTTCTTCTAAACCAATGTTTTCTCGCTTTCAGCAAGCTTCCGATTTGAAG  
AAACTGCTTATACGACTTGATTTGAACCTTCGACAAGATTAGGAAGATCTAAAATATCTTCTTTCTTTTG  
ACGCTGACCCGCTCCGGGC ACTTGAACATGCGAGCTCTCCTAAGACTTTAAGACTTTTGGCGATACCATT  
TCCCTATTTAGTCCCTCTGTGATCTCTAAACAGGAATACGACAGATGCTTTCAGCTAGGACAAAACAGA  
GCCTATCCAATACAGAGACACTGGATACTCCTATACACTTGTCCATCCGACAAAATACTATCACCTTGAT  
TCATTAAAGAAAAACCATTGCAACAGAAATATTC TGTTCGCGATGCCAAACACTAAAAGTTAAGTCCAG  
ACAAATCTGTTAAGACGTACCGGAAACCCCTCTGTGCCAGCTACTGTGCAGCTAAACGAAAAGAGAAGC  
TTGCAAGTAACCCCAAAGCATTC TCTTTCCATAACAATTACAGCCCTTAGCAACAGCCTTAGCACCG  
GCTTCTTGTAACCTCTTAACAGTGTCTTCTGCATCACTTTTAGAAGTTTTTTCTTTAACCGTCTTAGGTA  
ATCC TTCAGTCATTTCTTTAGCTTCTTTCAAAGCTAATCCAGTAACCTCTCTAACACTTTTCAGAACCC  
GATTTCTTATCAGAAGGAACGCTTCCAGAAT TACAGCAA ACTCTGTAGGCTCTGCAGAAGCAGGAGCA  
TCACCAGCGGCAGCAGCACCAGCAACAGCTACTACAGGAGCGGCAGCAGTAACGTCCACTTTCTTCCA  
ATAATTTTTTAAGCTGAGACAATTC AAGCACCCTCAAGCCGCTCAACTGTTCTACTAAAGTTTCCAACCT  
TTCTGTTGTCACCTTGTCAACCTTATTTTTTA GAATGTTAACACTACTCTTGAGT TTTTCTGCTTTCTG  
GTCGACACAAGAAACAACACCAGAAAGA ACTGAATTCATAATTCCTACAACCTTGAGACATAGGAGCAGCA  
ATGAGTCCAACAACCTGCTGTCTAAGCTTTTCATAGAAGGCAATTTAGCAACGGCCTCAACTCTCGCC  
CAGACAAAGAAGCATTATCTATTC TTCCAGCTAGAAAAC TAGAGAAT CATTATGCTGTTTATTGAAATC  
TAACACTTGCTTCGCAGCAGATACTGGATCGCCATAGGC GAATACAACCCCAAGATGACCTTCGCTGTCT  
TCTGGATCCATTTCTACGCCAGAAGTCTCTAAAGCTTTAAAAAATATTTTTTTCTTTAAACTTCAA ACT  
CAGCAGAGACCCCGGAAAGATTATTTCTAAAACCTCTAGAATGCGTAGCAGTAAAACCCAGGTATCTCAA  
CAAAATAAAACCTTGAGAAGCGGTATCTTTTCTTCAACCTCGCGAAGCAGCAACTTTTTCTCTTCTTCT  
ATTTTTCTCTTTAACTTAGAAT TATAACGCAATCAACTCCTAGTATCCACGGTAACCCCTGGCCCCA  
TGGTCGAGGAAATAGTGAAATTAACATAAATATTGTCCTTTAGCAGTTGCGGGCTTAGCTTTAACTAAGGC  
TGCACACAACGCTTCAACATTTTCTTTGATTTGCGCACTATCGAAAGAAAGCTTCGCAACTCCGACGTTG  
CATAACCAGCTCGATCAGCTTTAAATTC AATTTTACCTTTTCGCAGTTCCGCAATAGTTTAAACCACAT  
CTGTTGTTACAGTTCCGGCTTTAGGCGTAGGCATAAGGTTTCTTGGACCTAAAACCTTTTCTAGCTTTCC  
GACCTCTCTCATCATATCGG GAGTGGCAACCGCAACATCGAAGTCAACCCATCCACCTTGATTTTTTCT  
ACCAAGTCGTGCTACCAACAAAGTCCGCTCCTGCTTCAATAGCCTCTGCAGCCTTATCTCCAGCAGCAA  
AAACTAAAATTCGCAAACCTTTACCTGTACCGTGAGGTAAGAAACCGAACCACGAATTTGCTGATCACT  
CTTTCTTGGATCGATCCCTAATTTAACAGACACATCAACCGTTTGATCGAAACGCACAGTAGGACACTGT



TTTAAATATCTATCGCTTACCCAAA GAATACGACTTAGCTAAATCGTAAGTCTCTTGGATACCACGAA  
TGCGTTTTCCATGCTTTGTCATAATTATGCAGCTCTTTAACTAATTACTCTACATCTACACCCATGCTTC  
GGCAGTCCCTTCAACCATTCTCTCGGCGACTCTAAAAGAACGACATCCATGTCCTTCATCTTTTGCTC  
AGCAATTGCCGTAATTTGTGCTC GAGTTAATTTACCAACTTTGTTTCTATTAGGAATCTTAGATCCAGAT  
TCCAAGCCCAAAGCTTTTTTAATTAACGAAGAAACAGGAGACTGTTTCATTACAAAAGAAAAAGTCTTAT  
CCGAGTATACAGTGATTACAACAGGGAGCAAATCACCTGGACGGTCTTGAGTTGCCGCATTAAACTCTTT  
GCAGAATCCCATGATATTCACGCCCTGCAGCACCTAAAGCAGGACCAATTGGTGGAGCGGGTTAGCTTTC  
CCTCCAGGGATTTGCAATTTAATGATTTTAATGATTTTTTTTATTCGACATATTC AACCTACTCTACCTT  
AGTATTCCTCTCAAAACGAGGGGAAAAACGAAAAAGTTAAATTATAAGAACATAGAGAATAA GAATACA  
CAGAATTTCTTATTC TTACTC ACTTTCTTGCCCTGGCAGACTTCTCTACCTGCCAGA ACTCTAAATCA  
TCGACGC GAGTCTCTCTTCCAAAGATAGAAACCATAACGCTAAGCCGCCCTTTGTCGTGGAACACTTCCG  
ACACA ACCCCAACAAAGTTAACAAACACGCCGTCATTAATTTTAACCTGAGATCC CACTTCAAACCTTATG  
TTTTTTGAACA ACCC CAGATTTTTTCTCTTCTAGATCTGCTAAAAATTTTTTTATTTCTTCTTCAGACAGA  
GCAACGGGAGCGCCTCCCCCTAAAA ATTC AACTAC ACCCTGCGTCTTCTTACATAAGACCAAGATTCAT  
CTGTTAAATGCATCTTGACTAAGAGGTAGCCTGGCCAAATATACTTCTCAACGATCTTATGTTTACCTTT  
CTTCACCTCCATAAC ATTC TCGGAAGGCA GGATGATCTGCTGAATAAAATCAGAC ATCCCTGAGGCTTCT  
TTAAAACTTCTTAAAGACTTTTTTACTTTCTTTTCTTGAGCCGTAAAAACTTGAGCAGACATACCCTTAA  
ACAT GAATCAACCAAAGAAAAAGCTTGTACTTACCTAACAAATGAAAGGGACTTTCGAAGAGCTAAATC  
CACACAATAGATGGAAA ATCC AAAAGCCAAAAAT ATTC ATCAAAAACAACTTTGACGTATCTTTTAAGATCT  
CGCTTATTT ACCCACTCAATCTTCTTAATTTCTTCGATAAAGCT ACCCGCAAAAAGCTGCTTGTTTTTTTG  
CAAAAGATACTTTCTTAAAGAAATTTTCTTCGGTGATCTTGCCCCATAAGCGAATTC TTTCTTTCAGTTACC  
TAATAC GAGT GCGGAG GGATTC GA ACCCCCGACCGCGGCTTTGGAGGCCACTGCTCTACCATCTAAGCT  
ACACA ACCCAAAGGCAAGGCTTTTCAGCCTCGCCAACATATCACTTAATTTATGCAATGATCTTAGAAATA  
GTTCCAGCACCGATTGTACGACCACCTTAC GAATCGCAAATCTCATACCTTCTTCTAAAGCCACAGGGC  
TAATCAACTGCACTTCAA ACTCAACGTT ATCCCGAGGCATGACCATCTCAACTCCTCAGGCAGAGT TAC  
CACACCTGTAACGTCTGTTGTACGGAAGAAGAAT TGAGGTCTAT ATCC TGTGAAGAAAGGCTTATGTCGT  
CCACCTTCTTCTTTTGCAGAACGTAAACAGCACACTTAAACCGTGTATGAGGTTTAAACTGTTTGCCA  
AGCAAACAACC ATTCCTCTTTCCACATCGTTCTTACCAATACCTCTGAGGAGCA ATCC AAC ATTC TCTCC  
TGCAGACCTTCTGG GAGT TCTTTTCTGAACATTTCA ACCC CAGTAACAATCGTTTCTTTAGTATCTCTA  
AGACCGACCAACTGAACTTTATCGGAAACTTTAACA ATTC CACGCTCAATACGTCCAGTTACTACAGTTC  
CTCGTCCGGAGATAGAGAACACGTCTCAATGGGCATTAAGAAAGCTTGTCAATTTCTCTTTCTGGAGT  
AGGGATATTATCATCGACGGCTTGCAATTAGCTCTCGAACTTTCTCTATGTATGCAGC ATCC CCTTCCAAA  
GCTTTCAGAGCAGAACCTCTGATGATTGGAC ACCC TTTGTATCC TTTCTCTTCAAGAAGCTCAGCCA ACT  
CATCTCAACCAAGTCGACCA ATTC AGCGTCTTCTTCGGAAATCATGTCAATTTTATTGAGAAAAACAAC  
GATGTAAGGA ACCC CAACTTGTCTTGCCAAAA GAAT ATGCTCTTTAGTTTGGAGGCATAGCTCCGTCTGTT  
GCAGAACTACTA GAATAGCCCCGTCCATTTGAGCCGCACCGGTGATCATGTTTTTAAACATAGTCAGCGT  
GACCAGGGCAGTCCACGTGAGCGTAGTGACGATTAGCTGTTTCGT ACTCAACGTGGGAAGCGTTAATTGT  
AATACCGCAGCTTTTTCTTTCAG GAGT GTTGTCAATAGAGCTATAATCACGAAAAATCAGCCA ACCC ATCT  
CCAGACAACGTACGCGTAATAGCAGCTGTCAACGTAGTCTTACCATGGTCAACGTGGCCAATGGTCCCTA  
TGTTGATATGAGGCTTATTACGTTGAAAAGTTTCTTTTGACATCTCAAAAATCC TCAAATTA AAAATTAG  
TTTGCTACCGATATCTTTTGCCCA GAATAGGAAT TGAACCTACGGCCACTTGCTTACCATGCAAGTGTCTC  
TACCCTGAGCTACCTGGGCTTAGCACAAAAGAGGAAGCAACCTAATTAGCATCGCAACTTTCCCGCAAT  
CAA ACTCTCAACCAGCCTCAACTAGTTTTTCTCA ACCC CTACGCCGACAAAAAGTGGCGCA GAAT ACAA  
CTGAAGATAATCTCGGTCTCGACACGAGCATAGTAACTTACAGACGC GGAT TATTATCAAGCTTTCTCTT  
AAAACCTGCGTGACTTTATTTATAA GGATAGCAAAAACAACCTTAAACGATGTCTGTAGACAACACGAGCCTT  
CGTCAAATCATAAGTAGACATTTTCGACGGTACGCGATCTCCAACGAGCAAGC GGATATTACTC ATACGC  
ATTTTACCGCACAGATGCGCTGTAATGGGA ACCC CATTC TCTAACATC ACCCTAAAATGCATGCCGGGCA  
ACAGCTCTTCC ACTCTACCTTCTAGAACGATCGTATCTTCTTTTTTTGCC ATTC CTAAAAAAACCTAAAA  
AAC ATTC TATCTCTTG ATCC CAGC ATTC AAACAAAAAAAACAGGCCCTGGGC ACCC AATGAAGCTGCAGCA  
CCTGTTGTCTCCGGAA ACTCGAGAGAGCGATTATATCGACTAAACAGAAAATGTCAAACAACCTTGTCAA  
AAAACAGAAGGAAAAGTATCTTTTTGAC ATTC TCTCTT GAGT TTTTGGCGG GAAT AACAAATATTTTTTTAA  
TTTTGTTTACAAGCAAAA ACCCAATACCTTAAACTTGTCTCTTAG ACTC AATACTTACAGTAAA ACTC  
CCC ATTC TTTCC GAAT GAGAAGCTTCGCTTCTGTTTTAGAAAAACATTTTGAGAC ACTCTAGTTAGTCTT

GCCTGAAAATGTTGTCTCGGTATATAAAGTAGAGTAGATAGGCCATGGTCAAAGCCGCTCATCCCTACATTC  
TTCTTCTATTTCCGGCGCGCTGCCCTTACATTCCTCGAGAGGGGGAGCTTATCACGATTCCTTAGGAGAT  
CTGCACCTCCAAATTTCTTTGACTCGCCCGCATATCCGTACTCACCCAGAGCCTGCTCAAAGCAAAA  
GTCGGGTACAAGCCGTAGCCAATACTATCGGAGACTTTTTACAAAGAACTGGAAGCACTTACTCTTGTA  
CATTCTTGCCTGGTCTCTTATTTAATTTGTACAGTTCGGTGCACCTGTTTTAAGCATTGGCTAGGA  
ATAGGATTTGGAGCTGGTGTGTCCTGGTATTATTTCTGCTAATTTCTAGATAAAGAAAACAAATACC  
CTCACTTAAACAGTCTTTGGAATATCACTAATCACGGATTACAACAACGGATCCTAATGGAACTCGTCA  
GGTCTGCTTGCCACCGTTATTGCGTCGATTTCTGCCCTTATTTATGCCTCTCCTCAAGCTATCGGGTTT  
ATTATTGGAGCTTTTTTAGGACATCAAACAAGCTCGTTAGCTGTTTATGGATACCGGTTCAAATCAGGTC  
CAGGATATATTGCAGATCAGGAACGTTTGATAAAACAAGAAAAACGAATTCGACAAGCCATCATGCAGTG  
TCGGTTAATTCGTAACCAATGGTTTTGCAACGCCGCTAGATATATTACAGAAAACGCCCCATCGTCCG  
GGACAATCACAACCATAACAATACGACCTTTACAAACCGCATTTCTCTACCCGAAGAAATGGAACATG  
AGATCTTGGGCAAGAAACCACAAGTAGTCAATTGCTATGCTCGACAATAAAATTGCTCAGCTCAACCAATC  
GCTTGATACAACTCTATGACCGTCCAACACGAGTTATTGAACAATGATATTAACCTACCCTTCTGAACATA  
AAGCTTGTCTAGAAAAACAAGAGAAAGCTGTGGCTCTTCTCTTCCAGAAAACCTTTGTTAAAGATACTTT  
TTACAAACAACTCTTACAGATTGGTCGCACAGCCAAGCCTTTTCCAAAAGAGTTCTTGACAAAAGAAAAT  
TTAGTTTTAGGTTGCCAAAGCGATCTTTACCTCCATGGCAGTTCAAAAATAACGCAGTGTTTTTTTTTCA  
CCTATACCGAAGCTCTAATCTCTTCAGGCGTTGCTGTACTGTTCTCGGATATCTATTCCAGGAGAACTCC  
CGAAACCATTCCTACTTGCAAGCCTTTATTTTTTTGAGAAGTTAAGTCGACACCTATCCATGGGGAGATCT  
CGTGGAGGAGAATCTCTATTCCTGAACATGCAACGTATAGCCGTTCAATATCTGGCTCGAAAAACCTAAT  
GAGATAGCCAATGATTCCTATTGGCTATCTCCTCCTGCTCACAAGACTACTTAGTTTCTTCGACGAGCAT  
TCCTTACCAAGCGGAATGCTGTATAGAGAAAGTATAATAGCATGACCCCGCACCATATCATACGTATAAC  
ATTAAGCGTGCAGCCACACCTGTTGTCTGAACATCAGTCTCATAAATCCAGTAATAGATGGAAGAACA  
GGTCTGGTTGTGCTATTCCTCGAACATGTACTAGTATTATTTAACGACGGGGTAGTCAATGGCAATTA  
CTGTAGATTTGGTGTAGAGGTATTGTTGCAAGGAACCTCTCGACATATCTCTGGCAATCTTAAGCTAAAG  
CCGTCTATTCGAGAAACATTAGCTGCACCAAAGCCCCACAACTACAGACACTACTCTACCGAAGTAC  
CAACGGCAGCATGTTGTCTAGCACGATATCGGTCTCTCCGATCATCCCAAATAGCTCTACCGCTTGACT  
TTGGATTCAGAGACCCTAGCCTTTCTTCTCTATATACACTCGGAGTTGTAATCCTCATGCCAATCCAA  
CAACTCTATCCATAAGGCAGGCCAATGCCTCTCGGCAATATCCAAAAGAATTACAGGTGTGAGAGTAGA  
CTCCATCCAAAAAATAGGTTCCCTCAGGCAAGACTGGCGAGGATCATTTTTGAAGCAGCAACTGAATCGTT  
ACCCCGTAGCCGCAACTTAACTCATAACTCCGACCAACCATGCCAAGAGGAGAATAACTTCGCAAGCA  
TCCCTTAACATACGGGAACGTTGCGCTCTTCTTGGACTATGAGTACACAATAGAAAAGATTTCCGAAAGA  
TCTCCACATAAGAAGCTGTAAATCCGAAATCCAACATATCTAAAGCTTCCCAAGATGCAGGGGTATAG  
GAATATGCAGCCTTGGTTGTAGTTAGAGTATGTCTACACAGAGTAGTCAACAAAAGAATCAACCGTACAT  
AAGAAAAAGGGAAGGGATTCGCTGCTCGCACAGAAGAGGTAATATCCTCATTTAAAGCTGCATACAAACG  
CGAAAAGCAACACTATCTTCTGAGGATACTACTCGAACAAGTTGCAAACGAGAAAGTCCGAATCCCA  
CTAGTAGGAGAACTCGCTGCAGACAAAGAACTCAATCCTGCAAGCCGCATAAATCCCATACGCAACCAA  
GTTCAAAGCATGCATCCCCACTCCAGGAGTAATACTTTGTGAGTGAGGAGAAAATGGAACATGTGAAC  
ACACCCATCTCTCGGGCAGACAGGTATCCACTCATATCTAGAATTCGTCCACAACCTACCAGGACTTGTG  
TAGAAATGTCTATTGTGCTTACTGTTACAAAAAATGATGGATTAATTCACAACAACCCGAATACGAGCAC  
GCTGTAACGGACAGCTAATCAACTGAAGAGCTCTCTTACAAATAGCCCTCCATCGCCATAGTAAATCTG  
TAAAAACCGCCATCAGACACCCCTACTGAAAAACCTATCCCAAGCTCTCAACAAAGCTTGTACCGTAGGG  
TGATGAGCAGAAATGGAACAGCCCGCCACCCCTAGTCTCTAGCGAGCAGGTTACAGGCCATTCAC  
CAGCATTAGGAATCGCAGTCACAGGCTGATGAAAAGGTTTCGCTCAACTGAAAGCTCTCTCCCCACACT  
ACGATGAGTTAAACCCACTAGCATTAAACGTATCCCTACTTCAACAAACGGTATTCGATTGTGCTGTCATCA  
TCATCACTAAAATCATAACACGCCTCAGAACGCCTATTCGCAGCAGAATCAAGACTCAAATCTATCA  
AATCTGAAGAGGGACTGCTATCCCCCCCAGTAACACTCAAATGTTCTGCAGTAGCCTGAATCTGCATA  
GAAGCAGAACTCACAGATACCCCATCTTCTGGTGAAGAACTCTGAACTCGATTAGTGGTATTCCTTT  
CGTCGTATGTATGCGACAATAAGGTGTGTCTTACTATTATTGGAACATGGATCAGGCATATCTTCTCC  
CTAAAGGCGCCCCCTTTAAATTTGTTATTTAAACAACCACAAATGCTTCTAAACGACCCAAATCCCTCAT  
TGCCATGAACTAAAAAATTTGTGATCGAGTCAAAAAAAGCTCTTTGCTAGACCTTTAGGTCTAACAAAG  
AGCTTTATCATCGTTTCGCGAATTAATAATCTTCTCTGCTTAACTCCTTCGGTCCACCCCTCAGTCAA  
AGAAACCCAACGTTTGGTAACAGGATGCATCATTTGAGAGAAAAACAACCTCATAGGAAGCAATCATTTGC

GAACAAACACACCCAGAGAACTGCTGCTGCAGACCTGACTCTGAAATCAAAGCAAAGCGTTTCTAAAAC  
TGAGTGTGTTTCATATATGGAAATAATTTTTAATATTTGGCTCAAGGTTTTATTCTTCTAGAAAATAAACT  
CAAGAGCTTTTCACTCGCTTAAATACTGAAAATGAGATCCCTCTAATCAACAATCTTGGGAACAATAAA  
ACATTTTTGACCCAGCTTGGTCACACCCGTCTCTAAGAAGTAGGCACAAATACTATGTTGAACAAAACA  
AGAAGAAAACGGATGAGCCCATGTCTAAAAAGCCCTCTGTAGACCAGAAGGCTTGCTTTGACTTTGTAAC  
GATTATAAECTTCTCTTGATTTGCGTCTCTATCCCTTAAGTACTGCTCGAACCCGTAACGCGGAGTCCCTC  
GAATACACCAGAGGATCTAGTTCTGATTACACAACACCTTGTACTAACATCGACTGATGAGCATCTAA  
AAACAATACACAATTTGTTACTTAAAACGACTTTTAGGCGTTTCATCATAATAAATAAAAAAGAAACCAAGG  
GAATAGTATCGATTTCAAAGAAAAGGCGCAACGATAAAAACAAAACCGTCTTAAATAAAAAATTATAATACC  
CTGATAAGCTTTGTTCTTGTCAAACATTAGCCACCTATGATAAGCTTCCCTTCTTCTATCCCTGGGGCAAT  
AGCTCAGCGTTAGAGCTGCGGACTCATAACCCGTAGGTCCCTGGTTCAAATCCAGGTTGCCCCATTCTTT  
GTCTCCCGGTCTATAAAAACTCTCCCTCTAAAACACTAAAGTGTGAACCTCGACAGTTCCTTAGCTGAGT  
TTATCAATGCCTGCATCAAAAAAATATCTTTGCGCAAAATGCCTGGGCGCTCTACCCAGAAAGACATC  
AATCCCTCCGGGATGAGAAGACTGATACCTTCTTTGATATCCCAAAGGTTGACTCTCCACCCAACATC  
CAATATTATGTTGAAAAGGAGAGAATGCTTTCCAATCAAAGGAGAGCCTCTTTCTCCGCCAATGTGGT  
CGTATACAACAGTTACTGCATCGTTTCATTGGGGGCGAGTGTGCAGAGGGCTGTCCATTAGAATAAACGGA  
TACAACATAGAAAATAGAAAATGCTCTCGTAACTGAGAAAATTTGAATAGAATATCCCTCTCCAGACAAC  
TGGATACTGGTAATCCCTGTGCGCTCAGTAATAGCTAAAATTTCTTCTACTGAATGCTCTGGGAATACTC  
CAACAGGTTCCGAATTCCTTCCCTGTATAGCCTCTACGATATACTTTGCTTTTTTCTTCACTCACATCT  
TCGAGAATCTTTAGCAAAAATCATGCCAATGTAATCGGCTCCCGCTTTGGCAGCTTCCCGAGCATCATCA  
GGATGCGTAATACCACAAATTTTACCTTCATACAACAAAGGGGCTAAAACCAACTATTTAAGCAAATTC  
ACAGAAAAAAGTAAGACAAGAAGATCAGCATATCCAAAGAGTTTATATCAAAGCAATAGAAAATAAATCAT  
ATAAAAAAAGCCTCCCTTGCAAGAAATCAGGTATTACGCTTTGATCTATCTTACAAAATACATGCACAG  
GTTATTACAGCAAAATTTATGTTTACAGACAAGAAACTCACAGAAAACCATTTCCAACCTGGGCCACCT  
TCTCCACTCTGAGCCATCAAAGCAATTTGTTTTCGGTAATTGGAAAATGAACAAAACGCTTACCGAAGCT  
CAGACCTTTTTTAAAAGTTTTCTCTCTAGTGACATTCGTCTAATCCCAAATCATTACAGGAATCATTC  
CTCCTTTCACACTGCTGTGAGCTTGTCAACAAGCTGTAAGCGATTCCTCCCATCTTTCTTGGAGCCCAAC  
CACTCATGAAGCTGACTCAGGAGCTTTTACTGGTGAGATTTACAGCCCAATGCTCAAAGATATCGGAGTC  
GATTTTGTCTCATCGGACATTCGAAAGACGTCAATATCTTTCATGAACAAAATCCGTGACTTGTGAAA  
AAGCTGCTGCAGCTATCCATAGTGAATGATTCAGTTCTGTGTATTGGAGAAACTCTAGAAGAACAAGA  
ATCTGAGCAACTCAAGATATTCCTTTAAATCAACTGACTATAAGGATATCTAAACTCCCTGAGCAAGCC  
TCTTTCATTCATAGCTTATGAACCAGTCTGGGCTATAGGCACCGGAAAAGTAGCTATCCTGATCTAGTTC  
AGGAAACCCATGCTTTCTGTAGAAAACGATTGCTTCTCTCTTTTCCAAGATATGCGGAACGCACCC  
CATTCCTTACGGAGGATCTGTGAAAGCCGATAATGCTCGCTCACTTCCCTCTGCCCTGATGTGAATGGT  
CTTTTAGTTGGAGGAGCCTCTTTATCTTCAGAGAATTTCTTATCCATTATAACAACAATCGATATCCCAT  
AACTCACACGTACCTATGTCGATCACATCCCTCTATAGAAGTTCTGTCTGACAGATTCATTAAGA  
ATCTTTTAGAAAAAATTTCTTCGCGTAGTGGTTAAAGGAGAACTTAGTAACGTCTCTTTACAAACAAG  
CGGTCATTTATATTTGCTATCAAAGATAGCAAGGCTGTACTTAACGGAGCTTTTTTTTCATTTCCGTAGC  
CTAGAGGACAATAACCAGATTGTGGCCTATGCTCTCACCTTCTCCGGAGAAGGTAATTTGCTGCAGCAATT  
CGAAGAACGCAACAACGCTCTCGCTGCTGAGGGATATTTGATCCCAAACGCAAAAAGCCTCTTCTTCA  
GGAGCTCGCGTAATAGGGTGATTACAAGCCCTACAGGGGCTGTCATTCAGATATTTTACGAGTCTTTT  
CTCGCCGTTGTCACCAATTTCAAGTCATCTTATATCCAGTGACGGTACAAGGAGCTACTGCGGCTCAAGA  
GATTTCTCAGGCTATTCATTTTTCAATCAAACAGTATGAGGGTCCACGCTCTTATCATCGCAAGGGC  
GGTGGAAGTATCGAGGATCTCTGGCTTTTAAATGAAGAAGAGCTAGTTAAATCTATTGTAGCAAGCTCCA  
TTCCTATTATTTCTGCTGTTGGTCACGAGACTGATTTCACTCTCTGCGACTTTGCATCCGATGTTCTGTC  
TCCGACCCCTCTGTCAGCAGCAGAAATTTGATGTAAAGTAGTGATCAATACCGCCAAGAACTGCAAAAT  
CTACGGCGCTACGCTCGTCTCATGCAAGACAATTTATTGCGACTAAAAAAAACCTTCTCACTCATTTGGC  
AAAGACATCTTGTCTCAGTAGATTTCTACCACACAGCACAACAACTTTAGATTACACCCGAGCGGCCTT  
AGAAAAGAGGGATAGAAACCAACTTGAATACTATAAACAACGATTTGCGCAATATAGACGCTGGTTGAAA  
AGCGATGTTTTGATTCGTATAGAAAACATTTGGCAGGATCTGAACCAATCTCTTATGCTTTCTATAAAAA  
ATAAAATTTATACAAAAAACCCTCTCTAAACCAGCTATACACTTCTTGTCTCAAAAATGAACTACTGAA  
TTTACAGCACCGCACGCAGCACTCGGGAATATTTAAGCCAGCTATCTAGGAGGCTGCATATCGCGATT

GCAAGCTCACAACTCACCAAAGAGTGTGGTTCGTCCTCAGAACGAACTTTCTTTCACAATACAAC  
ACCTGCTAACTAAGGCGAAAGAACGGTGCCAGGCTATAACAAGAACAAGCTTCTCACTAAATCCAAAAA  
TGTTTTAAAAAGAGGTTTTGCCAGCTATTTGACTTTAATAAACACTTTGTTATCATCTCTGCGGAATCT  
CTTAAACAAAGTGATCTTGTGC GGGTCTGCCTCCAAGACGGTGAAGCAGTTGTATCAGTAAAAGAAGTTT  
GGCTTAACAATGACAAAAAGGCTAAAAATGTGGAAAAAGTCCCTTTTGAAGACGCTATGAAACGTTTGG  
AAGAGATCATAGACCTTATGAATCAACCAACCACGTCTTTAGAAGCTTCTCTTGCCTTGTATGAAGAGGC  
TGATCAATTAATGCGTATATGTGAGTCTCGCATTC AAGAAGTCGAAGCACGTATTAACAGCTTTCGGAC  
CAACGGAGCGAATCGTAGCCGGTCATGCAGGAAATCTCGGTACCTGAAGCAAGTCATCTGGACACCGTTA  
TACAGCGCCTTCTGGTTTTACAGAAGGCGCTTGAGGACTGTCATTC CGTGGAAGCTATCTTGGCTATCTA  
TGAGGAAATGTTTTCTCTTATTC AAGAAGGAGAAACCAATTTGAACCATGTGGAACAGCTGAGT TTTTCAG  
CTACAACATAACCCCGATGGTCTGTGCGCAGTAGATACTTCAGGCAATCCCATTAAGCATCC TTTTATCC  
CTGGGGAATCTGTATGACCTACTCC TTTTGGCCACACATCCACTC TCCTCAAGATCTTCATGCTTTATCT  
TTAGATAAGCTCCCTGTATTGTGTGATGAAATTC GTAATAAGATTATTGAGAGTCTCTCTTAACAGGTG  
GCCACTTAGCTTCTAATTTAGGTG GAGTAGAGCTTACCGTTGCTCTGCATTACGTTTTCTCTCACCAGA  
TGATCAGTTTTATTTTTGATGTGCGGCACCAATCC TATGTACATAAACTATTAACAGGCCGCAACACAGAA  
GCTTCTCCAATATACGACATGATAACGGACTCAGTGGATTTACAACCCCCCAA GAGTCGAACCATGATA  
TATTTTTCTCTGGTCATGCGGGCAATGCCCTTCTTTAGCTTTAGGGCTGGCCAA GGGTCTTCAAATAG  
CTCTTCGCATATACTACCTATTC TTGGAGATGCTGCTTTTTCTTGTGGCTTAACACTAGAAGCTTTGAAT  
AACATCCCTGCTGACTTATCGAAGTTCATTATTGTCTGAACGACAACCAAATGTGATCTCAGAAAACG  
TTGGGAATATTCCTCAAGGAATCTCCAGTGGATATATCC TCAAAAAATAAGTAACTATCTCAAAAAAT  
TCACTCTTGGATACAGAATCTTCCAAGTTTTCTACACAAAAGAAGACTTTATCGCACAAAGTAGATATC  
GCTCTGAAATCTTTATCCATCC TTTGTTTGAACAGTTTTGGCCTACATTACGTAGTCTTATTGACGGAC  
ATAACGTCAAAAAGCTTGTTC AAGCTCTGCAAAATGATCAAAGACCAGCCTCAGCCTATTC TGTTCATGT  
GTGTACAGTAAAAGGAAATGGTTTAACTGAAGCTGAAAGAGACCCGATTCGCTATCATGGAGT GAAAGCG  
CATTTCCAAAATACCTCTCTAAAAAAAACCTCTGGCAATGTTGAAT TACAAAACCCCGATTTCCGTTCCCTC  
AACATGCCGGGAATATCC TATGTGCACTGGGGAAGAAATATCC TCAATTGCAAGTCGTAACCTC CTGCCAT  
GTCTTTAGGGTCTTGTTTGGAAGATTTCCGCAAACAATTC CCAGATCGTTTTACAGATGTAGGCATAGCA  
GAAGGTCATGCTGTCACATTTTCGGCAGGAATAGCTCGTAGCGGCACCCCTGTATGCTGCTCTATATATT  
CTACTTTTTTACACCGGGCTATGGACAACGTATTC CATGATGTCTGTATGCAAGAGCTCCCCGTGATCTT  
CGCTATTGATCGTGCAGGGCTAGCTTTCCACGATGGACGTAGCCACCATGGTATCTATGATTTAGGCTTC  
TTATGTTCCATGCCGAATATGGTCATTTGTCAACCACGCAACGCCCTTGTTCCTGAAAGACTATTC TTTT  
CTTCTCTATTATGAAATCTCCTTGTGCCATTCGATACCC TAACATCC CAGCTAATGAGAAAGCTTCTAA  
CAGTTCCTTCCCTTTTTCTCCCATTC TTCTTGGAGAGGCTGAGATTC TTTGCCAAGGAGATGATTTATTG  
TTGATAGCTCTTGGGCACATGTGTAACACTGCTCTAACCGTCAAAGAACATCTTCTAGATTACGGAATCT  
CAACAACAGTTGTTGATCCATTTTTATTAAACCTTTGGATCGAAA ACTCCTACAATCCCTACTTACCCA  
CCACTC CAAAGTAATCATTTTTAGAAGAACATTCATTCATGGCGGCTTAGGGTCAGAGTTTCTCCTTTTC  
TTAAACCAACATAATATTAAGGCAGATGTTCTCTCCCTCGGAGTACCAGATATGTTTATCCCGCACGGAA  
ATCCTGAAACTATTTAAATTTGATTGGACTCACCAGCGATCACATCACTCAACGAATCC TTTCTCATTT  
TAAATTC TCCACACCCATTCCTATCGAACGCTTTTTTAAAGCGTAGCGATTGCGGTTGCTAAATATTTTG  
TATAGTTGAAGGCTCTTTTCATTTCCGATATTC TAGAAGATATTC TACTCACTAATACCGGTATCC CGAT  
TTATGATCGCTAGAACGAAAATTATTTGTACGATAGGCCCTGCAACGAATACCCCTGAGATGCTGGAAAA  
GCTTCTCGATGCAGGGATGAATGTAGCTCGCCTTAATTTTAGCCACGGGACCCATGAAAGCCATGGCCGG  
ACCATCGCTATTC TTAAAGAACTACGAGAGAAGCGCCAAGTTCTTTAGCTATTATGCTAGATACAAAAG  
GTCCCGAAATTCGTTTAGGCCAAGTAGAATCTCTATAAAAGTACAGCCTGGGGATCGTCTTACTCTCGT  
TAGCAAAGAAATTTTAGGATCCAAAGAAAGCGGCTTACTCTTTATCC AAGTTGTGTATTC CCTTATGTT  
AGAGAACGAGCTCCTGTTCTCATTGATGATGGGTATATCCAAGCAGTGGTGGTCAATGCTCAAGAGCATA  
TGGTGGAAATA GAGT TTTCAAAATTCAGGAGAAATAAAATCCAACAAATCTCTTAGCATCAAAGATATCGA  
TGTTGCTCTTCTTTTCATGACAGAGAA GAGTATTGCAGACTTAAAATTTGGGGT AGAACAAAGAACTC GAT  
CTTATCGCTGCTTCGTTTCGTGATGTAATGAAGATATTGACAGCATGCGTAAAGTTTTGGAAAGCTTTG  
GTCGTCTAATATGCCCATCATTGCCAAAATAGAAAATCATTTAG GAGTACAAAATTTCCAAGAGATCGC  
TAGAGCTGCTGATGGTATCATGATTGCACGCGGGGATCTTGGTATTGAAT TGTCTATTGTTGAAGTTCCCT  
GGACTACAAAATTTATGGCCCCGAGCATCGAGGGAAACGGGT CGGTTTTGTATCACTGCAACGCAAATGC  
TCGAGTCAATGATTCGCAACCCCTTCTTACACGAGCCGAAGTCTCTGACGTTGCCAACGCCATTTACGA

TGGAACCTCTGCAGTCATGTTGTCTGGAGAACTGCCTCAGGAGCCC**ATCC**TGTACATGCAGTAAAAACA  
ATGCGTTCATT**ATCC**AAGAGACTGAGAAGACTTTCGATTACCACGCTTTTTTCCAGCTGAACGACAAAA  
ACAGCGCTCTCAAAGTTTCTCCTTATCTTGAAGCCATT**GGGT**TTTCTG**GAATCC**AAATTGCAGAAAAAGC  
ATCTGCCAAAGCCATTATTGTGTAT**ACCC**CAGACGGGA**GGAT**CTCCGATGTTTTT**ATCC**AAATATCGACCT  
TATCTCCCTATTATTGCTGTT**ACCC**CTAACCGCAATGTGTACTATCGTTTAGCTGTAG**GAAT**GGG**GAGT**AT  
**ATCC**TATGCTA**ACCC**TG**GAAT**CGAACCGTACAGTCTGGCGTCACCAAGCTTGTGTATATGG**GAGT**AGAAAA  
AG**GAATTC**TTTCTAACTATGATAAAA**ATTC**TTGTCTTCAGCCGCGGAGCTGG**GAT**GCAAGATACCAACAAT  
CTCACCTTGACAACCTGTGCATGATGCGCT**ATCC**CCCTCTCTTGACGAGATAGTTCATAATCATTGAAAC  
CATATAGCAGGTATGCTTCTATCGTTAGACTTTCTGGTATTACTGTAAG**GAAT**TTAAAAACATTACAG  
TAG**GAGT**TTTGTCTCGAGAGATCGTTTTGTTACC**GGT**TTTCT**GGATCC**GGAAAAGTCTTCTCTTGCTTT  
CAATACTATTTATGCCGCAGGAAGAAAACGCTACCTTGCT**ACCC**TCCCCTCTTCTTTGCAACAAAAGCTA  
**GACTC**CTTACCAG**ATCC**CTCCGTAAAAAAGATAGAA**GGAT**TGCTCCAACCGTAGCCGTTAAGCAAACT  
TTTTCGAACAACACGTACATGCGACAGTCCGTAGTACAACCGAAATTA**ACTC**GTATTTAGCCCTACTTTT  
CTCCTTAGAGGGCCAAGCCTATG**ATCC**GGTTACACTAC**ACCC**TCTA**ACTC**TATACAGTAAGGAAAA**ATC**  
**C**TTTCTGAAATAGCTGCC**ATTC**CAGATGGA**ACTC**AACTGACTTTGCTCGCTCCTCTTCCC**GGATG**  
TTCTTACCGTTCGA**GAAT**GTCTCCGTCA**GGGT**TTACCAAAGTCTCATTGATGAAGAGGTTGTT**CCTAT**  
**TC**CATAAGTTTCTTACAACAGGC**ATTC**CTGTTCCCGGTCA**ACTC**ATTGTCGATACGTTGATCAAAAATACC  
TCTAAC**ACTC**CGCGGTTAAAAGTCAGCTTATTTACAACCTTAGACATCGGTCATGGT**GAAT**GCTCCTTAC  
ACTTCGATAATCAGAAAC**GAGT**CTTTTCCACACAGGCG**ACTC**TTCCAGAAACACAACAAACCTATGCGCC  
GCT**ATCC**CCAGATCTTTTTTTCGTCGCACAGTCACAAAGATCGTTGTCCACAATGCCAAGGTT**CAG****GAATC**  
TTTAT**ATCC**ATCGATG**ATCC**CTGTATC**ATCC**AGCAAACGCTCTCCATCGAAGACAAC**GCTGT**CTTTTG  
CAGG**GAAT**TGCTCCACCTTCTTATATAGAACCATCTATCAATCTCTAGCTGATAGCCT**AGGAT**TTAGTCT  
CAGC**ACTC**CGTGGCAAAATCTTCTCCTGAA**ATCC**ACATATTTTTTTTATATGGGAAAGAAGGTCTCTCT  
**ATCC**CAGTAAAGCTGTTTGATGGAACTTTAGGTAAGAAA**ACCC**AGACACATAAGCAATGGAAAGTGTGC  
TCAATGAAATTGGAGAAAA**ATTC**GATTTTCAAATAAGCCTGCTCGCTACCTTCC**TAAAGGGACTTC**CCTA  
TACAGTATGCCCCAGATGTAACAAGACTGG**ACTC**AGCGACTATGCTAATGCT**ACCC**GATGGCATGGGAAA  
AGCTTTGCAGACTTTCAACAAATGTCTCTTCA**AGAGT**TATTTATTTTCT**GAAT**CACTTCC**TAAAGAA**  
AGCTCGCTATTGAGGAAGTA**ATCC**AA**GGATTC**AAATCGCGACTTGCT**ATTC**TGATAGATCTTGGTCTTCC  
CTACCTTTCTCCAGAAAGAGCTATTGAT**ACTC**TTTCCGGGGGAGAACGGGAACGTACGGCCTTAGCTAAG  
CATCTAGGTGCC**GA****ACTC**ATCG**GAGT**CATGTAT**ATCC****GGAT**GAGCCTTCTATTGGGCTAC**ATCC**TCAGG  
**ATACCC**ATAAGCTTAT**GAAT**GTT**ATTC**GAAG**ACTC**CGTGATCAGGGAAACACTGTCTT**ACTC**GTTGAACA  
TGATGAGCAGATGATTTCTCTCGCAGACC**GGGT**CATTGATATCGGCCAGGAGCTGGTATTTTTG**GTGGC**  
GAAGTTGTCTTCAAT**GGAT**CTCCTAG**GAAT**TTCTGGCAAAG**GAGT****GACTC**TTTGACCGCACAATATCTCC  
GTCAAGAGCAACATATTTCCGGTCCCTGCTAAACGTACAA**ACTC**CTTAGGGACAATTACCTTATCTAAAGC  
CAATAAGCATAATCTTAAAGACCTGACAGTTTCA**ATTC**CATTAGGACAATGACTGTCTCACCG**GAGTC**  
TCTGGTTCTGGGAAATCTTCTCTTATCAACGATACACTAGTCCCTTGTGTGGAA**GAGT**TTATTGAACAG**G**  
**GATTC**TGTTCC**ACTC**TATCT**ATTC**AAGGAGCCCTCTCTCGCCTTGTCATATTAATAGAGATCTTCCAGG  
ACGCTCACAAACGATCT**ATCC**CTTTGACCTATATCAAAGCTTTTGACGAGGTTGTCAGTT**ATTC**GCAGAA  
CAACCTCGCTGTAAAACCTTAGG**ACTC**ACTAAAAGCCACTTTAGCTTCAACACGCCTCTAGGAGCCTGTG  
CAG**GAAT**GTGGAGGCCTAG**GAT**CTATAACAACGACTGATAACCGCG**ATTC**CATAACCTGTCTTCTGTTT  
AGGGAAACG**ATTC**CTCCCTCAAGTATTAGAAGTCCGCTATAAAAAATAAAACGATTGCCGAC**ATTC**TTGAA  
ATGACGGCCTATGAAGCTAAAAACTTCTTTTTAGATGAGCCTAGT**ATTC**CATCAAAAATCGAAACCTTAT  
GC**ACTC**TGGGACTACAATACCTTCTCTAGGAAGACCTCTCTATAGCTTATCTGGAGGAGAA**ATCC**AGAG  
**ACTC**AAGCTTGCATAT**GAGT**TATTGGCTCCAGTTAAAC**ACCC****ACTC**TCTATGTTCTTGATGA**ACCC**ACA  
ACAGGCCTCCAC**ACCC**ACGATGTCAAACAACCTTATTTATGTTGTGCA**ATCC**CTT**ATTC**CATCAAGGG**ACT**  
**C**GGTGATCATCATCGAGCATAACATGCATGTGGTGAAAGTTGCAGACTATATACTGGA**ACTTC**CTTGGTCC**TGA**  
AGGAGGAAATAAAGGCGGTTATCTCATAGCTTCTTGCTCTCCAGAAGAGCTA**ATCC**ATAAACAT**ACTC**CA  
ACAGCTATAGCTCTCCGTCTTTCTTCTCTCAAGAA**ACTC**CCTTATCTACCTG**ATCCGAGT**CCCA  
AACCTCCTGT**ACCC**GCCGCCATTACTATTGCAAACGCTCACCGATATAATTTAAAACATATCGATCTCTC  
CATACTCGATATGCGCTTACTGCTGTGACAGGTCC**ATCC**GCTTCCGGGAAAC**ATTC**CCTTGATTTGAT  
**ATTC**TGCATGCAGCAGGAACATCGCTTACGCAGAGCT**ATTC**CCTCCCTAT**ATCC**GACAAGCTCTCATAA  
AAAA**ACTC**CTCTTCTGCTGTTGATAAAGTAACAGGACT**ATCC**CCTGTTATCGCGATAGAAAAACGAG  
CGCTCGAGAA**ATTC**CAATC**ATTC**TGTGGCTTCTGCATTAGAAATCTCAGAAATGCTAGAAAGCCTTTTC

ACACGAATCGGCCATCCTTATTC TCCGATTTCTGGTGATGCACTAAGAACTATTTCTCCTGAAACGATTG  
CTGAAGAATGCTCACGCATTACACGAAAGGCTATGTAACGATTACTGTTCCCTTCCCTAAAGAGGAAGA  
GTTTTTCTCTTATACGCAAGAGATGCTTCAGGAA GGGTTTTTAAAACCTTTATGCTAATGAACAGTTCTAT  
GATTTAGATGGGCTTTCCCTACTTCTTTAGAGA ACCCAGCTCTAGTC ATCCACCATGTCAAATTTTAG  
AAAAAATCTGCCTTCTCTTTTGGCTTCTCTTACTTTAGCCTTTAGTAAAGCTTCTTCTGTCTGTCTGCA  
TATCGAATATGCTGGAACAAGCTTATCTAAAACATACCGCCAA GGAT TACAAGATGCTTCTGGGAACCTA  
TTCCTAATATAGAAAC ACCCTCTATCTTGAACCATGAGAGCTACTTATGCCCTCTCTGTCTATGGAAAAG  
GCTTCCATCCACTTGTCTATTC TCCCTCATAAGAAACGTTTCGCACAGCAT ACCCAATTTCCCTATT  
CACAAGCCTATTTCCTAACCAAGGATCC TTCACCGATCT ATCC TCTTCT GAATGAAC TAGGGATCC CTTC  
ATTGCTCT ATTC CAAGAAATAGATGTTCTTTCTTTT GAATCTCTTTGCCTAGGAACACAACAACATCTGG  
GAT GAATGCTCTTTGCACAAAAGCAATGTTAATG GAATCC GAAGAAGATTTCCCTCCCGACCTTATCTC  
CAAACTC CGTGTAACCAATGTCA GGGT CTTGGCGTATACACCTACAAGCATTGC ATCCGT ATTC ACAGC  
ATTTCCCTATCAGAAATTTACCAATCC AATGTGCGTTTTCTTAAAAAGCTCTTACTTTCTGTAGAAGAGG  
A ACCCTCTCTTGTCAAGATATCC TTAGTAGATTGGACCTTCTAGATC GAGTT GGGT TAGGCTATGTTAT  
CC TCGGACAAGAACAACAGTCTTT GAGT GACGGAGAGCATTATAGGCTTCTATTTGGCAAAGCTTTTTTCA  
TCAGGTCTCACTGATGTTATCTATCTTTTAGAAG ATCC CTTAGCAG GGATTCC ACCGGAAGATGCTCCTT  
GTTTGCCTTGCTGTTATTA AAAA ACTC GTGACCAACCATAATACAGTAATAGTGAC GGATAGAGAAGGCTC  
TCTTGC GGAACATGCTGATTACCTGCTTACCT GGGT CCTGAACCTGGTCCTAACGGAGGCTATCTCTTA  
TCAACCAGCGCTCTTAAACAATCTCAACCGGTA CTTTGCAACACACGCTCTTCCGAAGAAACACCACAAC  
TTTTCTGTCTCAGT ATCCACTTCTATG ATCC AAATGAGAACCTTGCTTTCCCTTTACAACG ACTC TCGAC  
TATTTCTGGTGTATCAGGAT CTGGCAAACAACCTTACTAAATAGCATTTACGAACATGGCTGCGCT ATT  
CTTGAAAAGGATCC TCTGTATTC TCAGAAATTATTTTTCTAG ATTC CT ATCC CCAATTTGCATCTTCTC  
GATCC GATATCAGCACTTATTTTGATATCGCTCCTTCATTAAGAAAATTTCTACGTTCTCTGACTCAAGC  
AAAAGCTTTAAACATCTCAGTTTCTATGTTTAGTCCAATACCAAACAAGGGCAATGTTCCGGATGTTTGG  
GGACTAGGATATCAAT GGATAGATCGAGCCTTTTATGCTATGGAAAAACGTCTTGTCCAACATGTGGAG  
GATTC CGTGTACAACC ACTC ATACAAGAAGTTGTGTATGAAGGGAAACATTTCCGGCCAGTTATTACAAGC  
CTCTTTAAATGAAGTAGCTGAAACTTTTTCTTTCTTAAAAAAA ATCC AGAAACCTTTACACACCTTAATT  
ACAAATGGTCTTGGCTACTTATCATTGGGACAAAATATGGCCTCTCTGTCTCTAAGTGAAAAAATTGCCA  
TAAAATTAATAACATCT ATTC CTTCCTCCTAAAC ATCC TACTTT ATTC TTAGTAGATGAGATAGCTAC  
CTCTCTTGACAATCAACAACAATCC GCTCTGCTCGTCCA ACTC AACACCTTGGTGTCTTTAGGACATACA  
GTAGTGATCATAGAAAACC ACCC CGCCTTCTCTCAGCAAGCTGATTTTTT GGAT ACAAATGGGACGTAAAA  
CAGATAATCAC ATTC TCTTTGCAGGACCTAATCC CAATCTATCTTTCACTTAAAGCCTCACTTTAAATAA  
AATTTGAGATACGCTTGCCT ATTC CTTGGAT TAGCTAGATGCCGTTAAATTTATGAGACAGCTATAAAAAA  
TAT ACTC TCTCTTTTACGAAGTTA GAGT AGATTAATACAGGGGAAAATGCGTAAACTAATCAGCAAAGAG  
ATTAGTGAA ACCCATTC ATAGTTTTCTTCATCAA GAAT AGTATAGCATG ATTC TTTAGTTATGACCTCTT  
ATCAAGTTCTTCAAGAAGGTACCGCCCGAACAATTTTTCCGAG ATTC TTGGCCAGGATATAGTCGTGTC  
TAT ACTC AAGAATTC CTTGCGTCT GAAT CGCGCAGCACACGCCTACATATTTTCTGGT ATTC GTGGGACA  
GGCAAACAACGTTAGCCCGTGTATTTGCTAAAGCATTAAATTTGTCAAA ATCC TACACAAGATCAAGAGC  
CTTGTAATCAATGCGCTATTTGCAAAGAGATCTCTCTTGGAACGTCTAT GGAT GTTATCGAAATCGATGG  
TGCTCTCATCGAG GAAT CGAAGAT ATCC GGCAAAATTAACGAAACAGTCTCTTTGTCCCTTCAAATCT  
CGCTACAAGATCTATATTATTGATGAAGTACATATGCTAACTAAAGAGGCTTTCA ATTC TCTACTAAAGA  
CGTTGGAAGAGCCTCCTGCGCATGTGAAATTTTTCTTGGCCACAACGGAAATTTGCAAAA ATTC CTAATAC  
AAT ATCC AGTGCCTGTCAGAAAATGCTCTTAAAACGCATTTCTGAAGAGACCATCATCGATAAGCTAGCA  
ACTATCGCAAAAACAAGAAGGTACAGAACTTCACGAGAAGCTCTTCTCCCATTTGCTAAAGCTGCTCAAG  
GAAGTCTTCGCGATGCC GAGT CGCTTTATGATTACGTAGTAGGCTCTTTTCCCT GAAT CTTTAGATCCAGA  
CAGCACAGCTAAAGCTCTCGGT ATTC TTTCCGAGGATAGCCTATATCAACTTGCAGAAGCCATTACT ACC  
CAAAAATTACGAACAAGCGCTAACGCCGTTTTCCGATGCTATGCAAAATGG GGGT TGCTCCAGCCCATTTTC  
TTCAAGATGTAACCTTGGCTTTTCCGTAGTTTCTCTTAAAGCAAT ATTC TAAACA ATTC ATTC TGTAGC  
GACTAAAT ACTC CTCCGAAATTC TATTAGAAAT ACTC GATTTTCTAGGAGAAT CTGCACGGCATATTAAT  
CTCGGTTATTTGAAAAA ACTTTTCTAGAAACGGTGATT ATTC GTCTTCTAC GAAT TTA CTCTCGCCCTA  
CATTC TCTCAGCTTGTCTCACAGATACGACAACCTGCACCA ACTC AAATACGCCCT ATCC TACTGCCTC  
AGAACTA GAAT CTTGCCACCACAAAATCAAATCAAGCAATACTGAGGAAACAAAATCATCACCACAACCA  
ACAGCTGTAGCAAAA ACTC TCCCAAGGAAGCCTGTTAACCGCTGCCATCACAAACTAAGAAAGAACTA

TCCATCAGGAAACACCACCCCTTCTCTCGATAAGATTTCCCCTTCTGAATCCGCAGCCATCGACACGCT  
GTTACAATTTGCTGTTGTAGAATTTTCTGGAGTTTAACTAAGGAGCCAAAACATGGGTAGCGGTTACGC  
TAAAAAGAAAAAGAAGCCAAATTAATGGAACGCCAATTCATGGAAATGGAGGCCCTCTCTTGAACAGAAA  
CGTTTTTCTGGAGAGGCTGGAAATGGCTTGGTATCTGTAACATCAACGGAAAATGTGACCTGGTTGATG  
TTCGAATTAACCAGATTGTCTAGATCCGTAAGATCCGTAAGTAGTGGCAGACTTATCCGCGCAGCATT  
TAAAGCAGCTAAAGCAGCTTTGGATAGTGAATGTCCGCTATGCAAATGGGAATGCCGTTCTAATTTTTT  
CCGTTACACATACAGGAGTTGATGAACCTCTTCGTATGTTTTCGCCCGCAATAACTGCTTCGTTAAACGA  
GAGCACTCCCTTGGATTCAAATCTAATAATCGCATTTTCAAAGAATTTATTGCTGGATGACAGCTGATA  
ACTCCTTTACCCCTAGTCTTAAAAACATAGGCAGAAGAGCAGGATCTCCTGCCATCTCTCCACATACAGA  
TACGGGAACATCTTCTGTTTAGCCTGCTCTACAACATGATGAATCATTCTAATAACAGAAAGGATGCGGC  
ACTCTACTCCGCTCTCCAAGTAAGGAACGCTCTCTAGAAGTGCCATAAGTATACTGAGCAAGATCATTAG  
TACCTAAAGCTACAAAAGAACTCTCTTGTAAAATTTCTCTATCATCCAAACTGCAGAAGGGATCTCTAT  
CATGCTTCCCATAAGATATTTTCACTGATCCCTTTCAATAGCCGAATTTCTTCTTGAAAAAGCCGCTTT  
ACTAAAGCAATTTCTGAAGCATCTATCACCCAGGAATCAATACCTTAAGTCGTCCTATTCAGAAA  
TAGCAATAGCCTGCAACTGCTCCTTCAATACTTTTTCTTGTCTAATAACCACCGTACTGACCGATGAGA  
AGAGGAAATACAAGGACACTCTTATCCCTCTCCAAAATCAAACAAACGCAATACATGAATATCTGAACAC  
TGAAACTGAATAATTGAGCATATTGATCAGCTTGTCTTCAACACAGGGTAAGCGTCCCAAAGAAAAAG  
CCATAAATTCGTAACGGAAGAGCCCAACACTTGTTCCTGGAGACTCCCTTCAATCATGGGCAATTCCTC  
TGTACTTACTATCTGTGCTGAGAGAGATAAGAGGCAGATTTTTCCCTGTCTGCACCTGCCTGGAACA  
GTGACAGAAACAGACGCTTGCTTACGATAATAAGTTTGTATCGTACTTAGCTGAGGATTAACGTAATCT  
CTCCCTTATCCCATTAATGAGAATAATGTCCCACTAAACTCGTTAATAGTATCCATAACTCTGTAGT  
AAAATTGGCAACATAAGGAATATTTTAGCCAAAGATACAATCGCGGTATGCGAAGTTTTTTCGCCCTCT  
AAAGATACAAAGCCCCTGATGTACTCGGGATTAGCATTTGCGGCTTCCGAGGGAGTAAGCTCTTCCGAAA  
AGACAATAAGATTCGATCAAACCTCCCTAAAGAACTCTTATGCTGACAACAAAGATGGCCAATCACTCG  
ATTAGAAATATCATGGATATCCGTAACTCGATCTACTGTGGTAGCAGTCGTCTTCTGTACAGCACATAGA  
GATTTCTCTATCTCTCCCATGACAGAAGAAAAACAAACTCGCATTCCTTTCGATCTTTTCTAATTTGTTT  
TAACCACCTCTCCGTGAGAAGAGGGTCTTTTATAATTTCTAGATGTGCCTGCAAAATGGAAGCTATCTC  
TTGATATCCCTGCTTTCCCTTGTCTTTTTCTAAAGCAGCTAGATCTGAACGAGATCTCTTCAAAGCC  
TTGTAGTAGCGACTGATCTCATGTTCCACTTCTTCTTGAGGAAGAGTTAGCTCTCGTATCCGCAAAGAAG  
ATTTGCCCAACAATAAAGCTTTCCCTAGCCCTATTCAGGGACTATAGGCTCCCTACAATAACAAACTC  
CTGTTGCAACTCCTTATTATCTTGACCGTAACGCTCATTACAACTCTCCGAATCCAGAATTA AAAACCT  
CGGAGAGTTTCTGCATTACTCGAGAAGCAGAGGGGCTTTTTATATGAACAGCAACCTCGCCATTATAAGA  
AGCTCCTAACATAAGAATACTCATGACGCTCCTAGCGTTCACGGTTTTCCCTAAATAGGTCAAGTCTGCT  
TCGCATTCCTCGCCTTCGAAGAGTTTAAACAATAGTACCAGCCGACGCACGTGTATCCAGAAAGGATTC  
GTATCGTAAAAACTGCTGAGAGTTCCCATCTTCCATAAGAGGAGCTTCTACAGGCCATGAAGAACTGA  
ATCATTCCTCCCTACTCATAGTATTCCTCCCTGTACGTGTAAAAACAAAATGATGATAAGCTAAATCCAAAT  
CAAAAAATACGATAATAAACCCCTTAGAGCTTCTTTCAAAGCTAAAGAGAAGAAAAGCGTACTTTTTTT  
TCTAAAACCTAGCCTTCTAAGGTTTTTGAGATAAAAGATACTGTTCCAGCCAAGTAAAAACGTATGATAA  
TGACTATCAGAAAGCATTTCTGAAATGGCAATTTTCCCATGAGGAAATAAGCTTTGATTATCTAAACGCA  
CGTTATACGAAGGAAAATACTGACGAATCTTAGCATCGATGATAAAACAACGACTGTCCGCTATATCGTA  
CTGAGCATAAAATGGAAATATACCCAAAGAACTACAATTATCTTCCAAAGAAATTTTCCCTCTACTTAAT  
AAGCTTCTCTAAGAAGATATTGCGCTTGAGCCAAATAACGATAAGGAAAAATACCAATCTCCCTTCTC  
GAGAAAATCCATTATGGATAGAAAAAAAATGACGATACGTCTCATCTCCTAACTTAGGAAAAACAATCC  
TACAGTTTCAAAGGAGGCGCGCTAAATATACTATTCCTTTATACTATAACCATTTGCACATCATAA  
GGAGCGGATAAACTATTTGCGGTTATCCGAACGTCCAAATGGCTCAAAGAGGAAAAAAAATGACAAATACC  
AGGGAAATCAGTATTCACAACCCAAATGCAGAAAACCAAAAATCTCGAAATAGCTCGATACGATCTGCT  
TGAGACAGACCTACCAACTCAAACCATCTCTGGGCAACCGTGGAACTTTAGCAAACACTTCTTCCCAAG  
AAAGCGTCTGCGCATCTGCTCGAGAGAAAGCACTTCTACCGGTTGTTTAGAACAAGCTGATGTTACGCT  
ATCTTTATACCACTGCATTCCTAACCTCATTACATCGCCTATCTGCCTTACGGATAAGGCTATTTAGTTC  
CTGCTCTGTCTTCCAAAACAACATCCATTTTTCAATGGGAGCGCCTACTGGTTAGCAGGCATGCTTGCT  
CATCAAGCTCCTATCTGCTGCGCACTCTTGATTGTAGCGCTACATCCTTTTATTCCTCAAACGCTGTTTGA  
AAACGCTCTTTTCTTGGATATTTGTTTTGGAGTCCCTCTACTATTCCTCCTTTAATATCTCCATCAA  
CGCATCAGCTCTGTTGCTAACTCTAAAATACAAGTGACAAAAGGATCTGCATCCGGATATTTCTTAAT



AAAAAAAAACTCACTCACCGCTATTC TGGAACAGCTCTTTCCCTAGAAACGGAAGATAAACAATCC TATC  
AAAACCTCCCTTGCTCCATCATTTCTACTATTC CACTTAGTGAGCATAACCGTGATCACTTAGAAGGCTG  
CGTATCTAAATCTTCATGCCCTATTACTTTTTCGCTCATCAAACCTATAAATAC ACCCACGCAATCC TCT  
ATTTTTCTGAGAAATTC TTCGAACTATTC TCTTCCATATTC TCAAAGAAAATTTCCGATTC TTTCTTCATC  
AGAGGATCC TCAACCTATTTTCAGACAAAGATATTGGTCGATTC TCATCCAGTTTAATCC TTGGCACTCC  
CCTCTCTTACAAACATAAAGAGCTATTC AAAAGCAAAGGAT TGTCCCATCTTTTTTCTGTATCAGGATGG  
CATTCTCACTATTTGCCAATACCTTCTTCTTTTTATTAGGAACGCTTTCCCCAAAAACGAGGTCTCT  
GGGT CCTCTTTCTACTC TCTCTTCTCAATTCGTATTC CCAACCTCTCCCTCTGTATTTAGGACCTGGTT  
CTCTAGTATTC TATTC TGCCTGGCTCCTTTTTCTATAGGACACTGCTCTAGCCTGAAT CGACTAGGTATT  
AGTTTTATTTTTTGCTCGCTCTTTTTCCCTATATC ATCCCCAGCGCTAATACTC AGTTTTTTTAGCGACTT  
TAGGCATTTTTATTTTTCTTTGTACCGCTATTACGTTTCTTTTT ACTC TCCCTGGGAAT CATTATTC GGCAC  
TCGTTGGTTTTCTTCCCTCTTCGGTTTTGTATTC ACA ACCC TATCAATCTCTCTTGCTGCCCAGCTTTTT  
ATCGTTTTCCCAATGATTCGAAT GTTCAAATTC TCCCTTTAGATGGACTTATCTATAACCTGTTCT ACC  
CTACACTC GTTATGCCCATCTTCCCTTATGATTC CCTTATCATTCC CTTAATCC TCTCCTATCACACCTCTC  
TGAATCC TACATCTCCTGGATCC TTGATCTTCCCTGGCTACATGCTCCAAACGTCCTTATCTCGCTTACA  
TCAGCTCCCCCGACTTTAGAGTGGAT AACACTTGTCTCTATTATTC TTGTTTACATAGGGGCTCTATCCCT  
CTGTCGGGAAGGCTGTAATAACAGCTGTAGATC ACTC GATTATTC TCTAAATCTGTTCTAAAAAAAAGCG  
CTCCTGTTTTATCACTAGGAGCGCTTTTTGTTGGAAATGTCACTTGTATAGTCTAAA ACTC TGCCAGTAGT  
TTTTGCCCTTTGGAAGATTTTTTCTTTTTGAGGTAGCACCTCATTTTTCCAATACCTTAGAGT AAGGAACAG  
GAGCATGCAACGCTCCTATCC GCTTGATAGGAGCGTCAAGATATCTGTAAGCTCTCTCTGCTACCAAAGC  
AACCAGTTCACTACCAA ACCC CAAAA ACTC TGAAGCTTCATGAACAAC TAATAACTTCCCTGTTTTTTTA  
ACTG ACTC ACATACAGTAGCAAAATCACAAGGAACAATCGTTTCGCAAATCAATAACTTCAACAGAAATCC  
CTAATTC TAATAGATCTCTGGCCACCTCTACGCTCATTACTAGAGAC ATTC CCAAGAAACAATAGTTAA  
GTCTGTACCTGGAT GCACAATACGTGCTTGTCCGAAAGGAAGAACAATAATCAGAAGAAAATACAGCGCTC  
GTACTAAATAAACGCCGTTGATACAAAGCTTTATGCTCTAAAAATACCACC GGAT TAGGATCTC GAATAG  
CAGCTTTTTAATAAAGCTTTAGC ATCC GCAGCATTGGAAGGAT AGACCACCTTTAATCC AGGACAATGAGC  
AAGAAAAGCTTCTAT ATTC TGGGAAT GATATGGTCCGCCTTGAAT AT ACCC TCCGCAAGGAGT TCTTATT  
ACAATGGGCATTTCCC ATTC TCCGGCAGAGCGATAGTAGATACTC GCTGCTTCAGAAAACAGCTGTTGA  
TACCTGGCCAAATATAGTCTGCAAAT GAAT CTCTGCAACCGCTTATAGAAACCATCAAAGCC ATTC  
TACAGCAGCTCCGATAATAGTGGCCTCTGCTAAAGGCGTATTA AAACATCGGTTTTCTCCGAAT TGCTCT  
GTCAGAGT CCTTGTAACGCCGAAAACGCCTCCCTTATTTCTGCGAC ATCC TCACCAAAAACA ACTC  
CAGGAT CTCTCTGCATCTCTTCAACTAAAGCCTCTGTGATAGCGTCACGCATA ACTC TAGGCTCTAATTT  
CTGTAAGGAGGCAGTTTCTAATGCATTTTCATAATCTATTAAGGAAATATTGTAGGGAGCAAATACTTCG  
TGTTTGTTGCTCCTTTGCAAGGGAAGGAGCAG ACTC AGCAAGCTCACAAGCCTGATTAACAGTTTCTT  
GAAGCTCAGCCTTTATTTGCTCAATCACCTCATGCGCA ACCC CAAAATCATCAAGCAGAGACTTTTCTAA  
ACGCACCAGAGGAT CTGCGCTTGCAACACGATAAATCTTCTTCTGAACGATACTTGGCCTGATTATCT  
GAAT TACTATGAG ACTC TAACCGAACGACATTGACAATAACAAGAGCCG GAAT ATGTCGGTGTCTTGCA  
CAGAAACAGCCCGCTCAAAGTCTGTGTCAACACAGATAACATCTCCACCGTCAACCTCATAAGTAGCCAG  
GCCT GAAT AACTATTACCTAAAGCTACCAGATCTGCGCCACATTGGTCAGCAAAAGGAACGGAAATGGCC  
CACTGATTATTTTGTATGGCTATCACTAGAGG GAGT TGATGCAGAGATGCAAAAATTC AGCATCTCGTGA  
ACTC TCCTTGAGAAGTAG ATCC ATCACCGCCCGATACATATACAACTTC ACTC TTCCCAGAATTC TTAAC  
ACCC CAGGCACGCCCGCAGCCTGCAAAAACCTGTGTACCAACAACACTAGACTGACAGCATATACGAAGC  
TTTTTATGG GAAT AATGGTAAGGCATC ATTC TACCAGCAGAATGATTC TGTGTAGTCCGAGCCAAAAAG  
AAGCGAAGATTT CAGAAAGATCGC ATCC CAATCC TAAAGGGAATCC TTGATCC CGGTAATAAGGAAATGC  
CCAGTCCTTTCCC GAAT CAAGCTTTTTGCGCCACAACACCTGCAAGCTCATGACCAGCGCAAGATAAT  
TGAAAAGAGCCACCGGAACC ACTC TGGCGAGATAACAACAACATCTTCCGCTCTGA GAAT CTCAAAGTCC  
ATGCCAACCTGAAT AC ATTC TCAACAGCA GAGT CTAATTGGTATACG GAGT GTCTCACAGCAGCTCCCTC  
TCAGCTAAAAAGATCC TTCTTTCTATACAGCAAAGTCAGAAAAAAAACCTTTGATTTTGTCTAAGAA ACT  
CCGTTTCTTAGGGAAATTTTCAGCCTTCTCCGTAGCAGCAAACCTGTCTCAATAAATCTTTTTGTTCATTA  
GATAGGTGCTGGG GAGT CTCCACAGAT ACTC TTAATAAAGATCTCCTCTGGAT TTCCCATGCACATTGG  
GGAATCC CTGCCCTCTAACTTTAAGAAGTGTTCGCTCT GAATCC CTTCTGGGATACTC AAACGGCAAGT  
ACCTTCTTTAA GAGT GTGGGGAT TTCCTTCTTG ATCC CTAAGCCGCATCAACAAATCC AATAGGAAGC  
TCTAAAACATAATC ATCC CCATGGCGCTCGAAAACA GGAT GAGGCTCTACATCAATAAAAACATACAGAT

CCCTGCAGGCGCTCCATTTTGGCCAGCATCTCCATAGCCTTCCATCTTTAATCTCATCCAGAATCGAC  
TCAGCTGGGATATTAACATGGACGCTACGTTTATCCCTTGATACGTCCCTGCCACGACAACTGAACAA  
GGATCTGTGATAACCCGACCTTACCACACTACAATCAGGGCAAGTAGAAGCCATGGAGAAAAAGCCTCGAC  
TTTGCCTACTGACCAGAGCCCTTGCATCGATCACAACCTTTTACACCTTTAGCAGTATTGGCTCCACT  
ACCAGAACAAGCATCACAAGATTTATAGCCTGAAAACAAGAAGTCTTTTTTCAACACCTTTTGCCGCTCC  
TCGAAGGACAGCGTAATATGCACCTTCTTACTAGCTCCTTGTCGAGAACTTTCTGAGCCTCCACGCATTC  
CGAAAGCTTCTCCAAGTCTCCAAAAAGCCCTTCAAAGAAACCGCTCCATTACCACCGAAATCGCCGCC  
AAAAGCTCCATAAATGTTTCGCAAAGCGTCTTCCATATTCCTCCATGCCAGCACCGCCGAATCCCTCCAGCA  
CCAGCAAATGGACCGTCTTTGCCGTAACGATCATATGACTCTCGCTTCTGCGCATCACCTAATACTTCAT  
AGGCTTCAGAACTTCTTTAAAGCGTCGCTCCGCTTCCAGCATCCCAAGGATTCCTTATCTGGATGGTACTT  
TACAGCGAGCTTACGGTAAGCTTTCTTTATTTCTTCAGGAGTAGCAGTCTTCGCTACACCCAAATATCGTG  
TAGTAATCCATGACGAAACACCCTAACAAAGATTTTTTCTAACGACCACGATATTTGGCTGCCGCTTG  
GATTTTGCTCGTTTTTTTTACAGAAAGTTTGTCTGAGAACTATGAGACTTAGAAGTTTTTCAAAATTCCTT  
CTTTGTGCTGATTTTTTTCTTTAAAATTCCTTAGAGCTCGATCTATAGGCTCTCCAATCTGACTTTAACACT  
GGGCATGAATAACCTTAATACGTAATTTGGTTTTTATTTAATAACGCGCGCTAGCTCGAACGCACAAGAG  
ACCGGGGATTTGTAACACCCTTTTATTTAGGCTTCAAGAGATACTTAGGTTGTATAACCTTCTTTGAATT  
ATAAAAATTGCCAAAATAAGTAAACAAAATCTTTGAAAAGTTGTTGTCCCAAAGGAAAACACTCTAAAA  
AAGGAAGAGATGCTCCGGTAATCTAAACACAACGGAAGATTTTGGAGACAGAACAACCTGCGAAAACAACGT  
ACTTACGGATTCGATCGATACAAGGAACCCTTCCCTTACCAGAAATACGCGAAGAAAATAGTTCTACGAA  
ATACGTTGGATCCGGAGAGATCACATGACAACATCCCTTATCTAAACAATACTCTAGAGCTTCAGAATAA  
GACAATAAAATTCCTCGAGTAGAAGTAGTATCTGTAAGCAGAAAACCATCAAGGAAAGCTCTGAGTTTA  
AAGCTACAACCCCACTTTTCCCTAGAGGCAAAAGCAAAGCCTCTCTTCTTGACCCAAAGAAAGATA  
TCCCTTCTAAAGAGCTATAGCCAACTAAAGGGACATTTTTAGCCAGAGAGAGCCCTTGGCAAAAAGCAACT  
CCCACTCTAGTTGCAGAAAATCCCGGGACCAACAGAGACTCAATACCTTGGAAGGCAAATCCAGGC  
TGTTGAAAATGAAATTTAACACAATCTCTGATCTGGCCCTGTAGGCAAAGACCATACTTCTAAAACATC  
TCGACAATCGACATAGGCCAAAAACGGCTGAGAACCAGGAAAGTGTCTACAATAAAATATTTGTACACAGCC  
TAAACTCTAGATTGATTTAGACAAAAGGATATAACCCTTAAACCGTTTTTAATTCAAAATTAATTCGCG  
TGTCGCCAAATCAAACCGACTTTACTAAAAAAATCTCATTTATAATTCGATAAATAACAGTTTTTCTATT  
CAACTTCTCTTTGCTGCAATTGATAAAAACCTTGCTATACTTTCTCGTGTTAGATGCACTAATTTGTTGCG  
ATTTTGTAGTATATCGGTAAGAAGAAGTAATATTAACATGTGCACACAACCTTGCTCTTCCAAGGATT  
TTGAACTAGTTGCCAAGGACAATGTGAATCTGACGAATAATACAGACTCTCAAAATCTAGATCCAAAT  
GCTTCAGAGGTCGAAAACTTCTCGACGAATCCGCAGAGGCAGAAAGTAGATGATCATACGCCCC  
CTTCAGAATTTTTATTCCTCCCTTGAATAAGCGTCTTTTTTCCCTGGCATGGCAGCCCCCTCTCCTTAT  
AGAGGCAGGCCCCATTATGAAGTACTTACACTATTAGCAAAATCATCCAGAAACACATCGGCTTTGTC  
TTAACAAAAAAGAAGATGCCAACACTCTAAAAGTTGGTTTTAATCAGCTTCATCGAGTGGGCGTATCCG  
CGCGCATTTTACGCATAATGCCTATTGAAGGCGGTAGCGCTCAAGTGTATTGAGTATAGAAGACCGTAT  
TCGCATCGTTAAGCCAATTCAGATAAGTATCTAAAAGCCAAAGTCTCTATCACAAGAGAACAAAGAG  
CTGACTGAAGAGCTAAAAGCTTACTCAATTAGCATCGTATCGATTATCAAAGATCTTCTAAAACCTAAACC  
CTCTGTTCAAAGAAGAGCTACAAATTTTCCCTTGCCACTCTGATTTCACTGAGCCAGGGAAACTCGCAGA  
TTTTCTCCGTTGCTTTAACTACAGCAACACGAGAGGAACTTCAGGAAATTTTAGAAACCACAGACATGCAT  
GATCGCATAGACAAAGCATTGGTCTTACTCAAAAAAGAGTTAGATCTAAGCCGCTGCAAAGTAGTATCA  
ATCAAAAAATGAAGCGACCATCACA AAAAGTCAGAAAGAATTTTTCTAAAAGAACAACCTTAAAACAAT  
AAAGAAAAGTTAGGGCTAGAGAAAAGACGATCACGCTGTTGATCTTGAGAAGTTTATGGAACGCTTCAAT  
AAACGAGACGTTCTCAATACGCCATGGACGTTATCCCAAGATGAAATGGATAAATTACAAACCTTGAGAA  
CTTCTTCAGCTGAATATGCAGTCTGCCGCAACTATCTCGATTGGTTAACTATTGTACCTTGGGGCATCCA  
AACCAAGGAATACCACGATTTGAAGAAAGCAGAATCTATCTTAAATAAAGACCATTACGGTTTGAAGAT  
ATAAAAACAACGCATTCCTGAATTGATTAGTGTAGGCAAACCTAGCAAACGGTATGAAGGGAAGTATATTT  
GCCTAGTGGGGCTCCAGGAGTAGGGAAAACAAGTATCGGCCGAAGTATTGCAAAAAGTGTACACCGTAA  
ATTCCTCCGGTTCTCTGTAGGAGGAATGCGTGATGAAGCAGAAATCAAAGGACATAGACGGACCTATATC  
GGAGCTATGCCAGGAACTTGTGCAAGCTTTGAAACAAAGTCAGATTATGAATCCCTGTGATCATGATTG  
ATGAAGTCGATAAAAATGGCTCTAGTTATCACGGAGATCCAGCTTCGGCCCTTCTTGGAGGTGTTAGATCC  
CGAACAAAACAAAGACTTTTTAGATCATTATTTGGATGTCGGCTAGATTTATCTAACGTGCTCTTATT  
CTAACCGCAAACGTATTAGATTCATCCAGACCTCTACTGGACC GAATGGAAGTGTGCGTTTATCTG

GTTACATTCTGGAAGAAAAATTACAGATAGCCACTAAATACCTCGTACCTCGCGCAAGGAAAGAGATGGG  
ACTTTCCTGCACAGAATGTGACTTCCAACCAGAAGCTATCAAGCACATGATCAACAACCTATGCTAGAGAA  
GCTGGAGTTCGTACACTGAATGAAAACATTAAGAAAGTCTTACGAAAAGTAGCTCTTAAAATTGTTCAA  
ACCAAGAGAAAAATCCTTCCAAGAAGTCGCGGTTTACAATCACGCCAAAAAATCTACAAGATTATCTTGG  
CAAACCAGTCTTTCTAGCGATCGTTTCTATGAAAAGACTCCGGTAGGAGTTGCCACAGGCCTAGCATGG  
ACTTCCCTTAGGAGGAGCAACCTTGTACATAGAAAAGTGTCAAGTCCCTTCTTCATCAGGTAAAGCGGATA  
TGCATCTAACAGGTCAAGCTGGGATGTGATGAAAAGAGTCTTCACAAATAGCTTGGACCTATCTTCATAG  
TGCTCTAGAAGTTATGCTCCAGGACAACATTCTTTGAAAAATCGCAAGTCCATATCCATATCCAGAG  
GGAGCCACTCCAAAAGACGGTCCCTCTGCAGGAATTACTATGGTAACGTCTTGTCTTTACTTTTGG  
ATGTTCTGTGCTTAATAACCTCGGCATGACTGGAGAGCTCACCTAACAGGCAAGTTTTAGGAATGG  
AGGTATCCGGGAAAACTTATCGCAGCAAGAAGATCGAAATTGAATATTTTAATCTTCCCTGAAGATAAC  
CGTCGAGATTACGACGAGCTCCCCGCATACCTTAAGAAAGGTCTCAAGGTACACTTCGTACACCATTATG  
ACGATGTATTCAGATTGCTTTCCCTGGGGTTTAAATCGTGTCTCTGAGCTGTAAGGCTCAGAGAACCT  
TCTCTCTTATTCACAACAATCAAAGTTTAGTATAATCCGCCTTCGAGACAATCCAGGAGGCTATTATGC  
AACTTCCGTCTATTATTCAGTCTTTCTTCTTCCCTAAAGCTCCCCCATCTCCACTTAAAAACCTATTTA  
TCAACAACCTGAACGCATCATCAATATAGCTTATCTTGTCTGTTATCCCTATCTGTTGTAGGAATATC  
TCTGGAGTATTCCTTTCCCTTAGCTTCCCCCTATTAGGCGCAGGCATTTGTTTAAATCTTTTAGCCGTAG  
GTTCCCTGCCTACTTGTGTTTCCATTGCTCCCAGGATATTGAAAAATAAATTGCTCTAAGAGAACCCTAA  
GGTCTCGATTACAACCTAGCTCCCCATTACCAACATTAATGCGCTCCTTCAAATCGATTGGCCTTGGAAAA  
GCAGCTCATTAGCTATCTGATAAAAAGGAGATCTTTCGTACAAGCTCTCCTTCTGTGAAAGCTTCTTATC  
CTCTCTTATTTATAAACTTTTTTAACCTAGAACTCTACCTGTTATCACCGACGAGCTTCTTTTCCTCA  
TAACGAGCTTTTTCTTGTGTTTAGGCTTAGTGGAAGTTATAATTTTTCTCTGAAACTGTGGAGAGACATA  
AGAAATTAATTTTCTATTCCTGCTTATTTATATCTTTGCACATCCCTACATTCCAAACCTCTTACCTTGC  
AAGCAAGAGGAAGTCGCTTGTAGGCATAAATGATTTTACCTTGAGAGATCTCTTCCCTTAAAGAGGATA  
TTGAATGAGTTATCGTGGATTAACCTATTCAGGCTGTTCAAGTCAACAACCGACTCGTCACCGTAATCAC  
GGAGCATATCTACTCCGTTGGAATGGGGAAGGGCTTTTATTTGACCCAGGAGAAGGAAGTCAACGTCAT  
TCATTTACGCTAATATGCCCCACGGTAGTTTCTCGTATTTTCATTAGTCATTTTCATGGAGACCATTG  
CTTAGGTTTAGGTTCCATGCTCATGCGCTTAATCTAGATAGAGTTTCACATCCATATACACTGCTATTAC  
CTGCTTCAGGGAAAAAATATTTTCGATAGACTTCGCTATAGCACTATCTATCACGAAACAATTAAGTTA  
TAGAGCATCCATCGATCGTGAAGGTATCGTAGAAGATTTTGGTAATTTTCTGAATAGAACTTCGCCAACT  
AGACCATCTTGTGACACCCTAGGGTGGCGCATTACAGAGCCTGATACAACAATAATTTATCCCTGAAAA  
ATTAAGCAGCAGGCTTGAAGGCCCTATCATGCAAGAGCTCATCAATAAGGGCCGGTAAAGGTTAATG  
ACACTATCGTCCATTTGGACGATGTCAGCTATAACGCGTAAAGGAGACAGCATTGCTGTTGTTGCGGATTC  
CCTTCCCTGCAAGCTATTGTGCACTTAGCAAGAAATGCTCGTATCTTATTATGCGAAAGTACCTATTG  
GAAGAACATTCCTATCTCGCTAAAAGTCAATATCATGACTGCCAAACAAGCTGCGGAACAAGCAAGC  
GCGCAGAAGTGCAACAATAATTCACACATTTTCTGCACGCTACAATACGACAGAAAGTATTGTCCA  
AGAGGCTGGAGAAATTTTCCCAATGTATTTGCTGCAGAGGAATTCGTAGCTACGAGTTCCCTAAAAAC  
CTAGTTAGCGCATATACTGTTGGAAACAACCCGAAAGCTTCTTAGCTCATAAGTACAGCAGGTTTGGGA  
ATGATTACATCCTTTATGCAATTTTAGATTACCTAAAAACATGAAAGCCTCCTCCCTTCATACATTAA  
GAAATTAAGTATGGATCTCAGCTCTCTAAAATGTTTTTTAGAAAAAAAAGCGATCTATCTCCAATCC  
CCCCCTCTCTCTCCAGCAATAACCTACGACTATCCCTCTCTCTTTCTCTCTGTTTACCAAAGACAAC  
ATCCGTCTTTATCTTCTAGAACAAATCCAAACGCATCATTCAAAGCGCACCGTACGCCGTGACTATCTG  
CTATTAAGGTTTTGCTAGATTTTGCCTAAAAAACAGTTAATACCAGAGAATCCAGCGGAAATGATTCG  
AGGGCTCGCCTTCCCCAAGAACTTCCCTCCCCACTCACCTACGAACAAGTCTTGGCCTAATGGCTGCT  
CCAGAATTAGATAAAGTTACAGGATTCGAGATCGCTGTTTACTCGAACTCTTATAGTTTACGGTCTAA  
GAATCAGCGAGATTACCGTCTGAATCGTGTGATATCGATTTCCAATCACACCTTTTACATATCCGAGG  
GAAAGGAAAAAAGAAGGAATCGTTCCTATGACAAAGGTAGCCGTCAGTGGTTACAAGACTATTTAAAC  
CAACCAGATAGAGCTCTGTAGAACAAGGATCATCAAGCTTGTTTTTTAAATCGATTTGGAAAACGCTAT  
CTACTCGCTCTATAGATAGAAAATTCACCAATATCTCCTTAAAAACAAGGATTAATCCGGATCTATTACTCC  
TCACACAATCCGTCATACTATTGCCACTACTGGTTAGAGCGCGGATGGATTTAAAAACCATTCAACTC  
CTGTTAGGCCATACTTCTTGTGAGACGACAACCATTTATACTCATGTTTCCATGAAATTAAAAAACAGA  
TCCACGATGAAACTCACCTCACAACCTTAGAGGAGTAACTACACCGGCAAACTTCTTGTACTCTAAGAAG  
GTCTTTGTTATCCTTTGTCCATGAGTATTGTTCTTGATAAAATCGGTAAAAACATTAGGGACACGAGTCT

TATTCGACGATGTGCTGTCGTATTC AACCCAGGGAATCGTTACGGCTTAACAGGCCCTAATGGAGCTGG  
GAAATCCACTCTATTAAAAATTATTACAGGCTTGGTAGAACCTTCTCGAGGAACTATTTCTTGCCCAAG  
AAGATTGGTATTTTGGCTCAAATATCGATAGCTTCGGTGACGTGATCGTTTTAGATTGTGTGATCATGG  
GAAACTCTCGCTTATGGGAGGCTATGCAACGTGAGATGCCTTATACGCGGAA GAATTTACCGATGCTAT  
AGGAATGGA ACTCGGTGAAATTGAAGAGATCATCGGCGAAGAAGATGGTTATCGTGCA GAGTCTGAAGCT  
GAAGAGTTGCTTCTAGGTATTGGC ATTC CAGAA GAATTTTTCTCTCAGAAAATGGCTACT ATTCCTTTAG  
ACTTACA ATTC CGCGTCTCCTATGCCAGGCTCTGTTTGGCC ATCC TGAAGCTTTGCTTTTAGATGAACC  
GACTAACCACTTAGACTTAC ATTC TATCAATTGGTTAGGTAGTTTTCTTAAAGACTATAACGGCAGGTT  
ATTGTAGTTAGCCACGACCGCCATTTCTTAAATACCATCACAACACATATCGCTGATATCGATTACGATA  
CTATCATTATCT ATCC AGGCAACTATGATGCCATGGTTGAAATGAAAACAGCCTCTAGAGAGCAAGAGAA  
AGCTGACATCAAATCAAAGAGAAAAAAATTGCGCAGTTGCGA GAGT TTGTAGCCAAATTTGGTGCC GGA  
TCGCGGGCAAGTCAAGTGCAATCC CGTCTGAGAGAAATTAAGAAGCTGCAACCTCAAGAGCTAAAAAAAT  
CTAAT ATTC CAAAGACCTTATATCC GTTTCCTGTGTCAGATAAAACATCTGGAAAAGTAGTCTTTTCTAT  
AGAAGTATTAGCAAAACATATGATGCAG ATCC TTTGTTGTTCA ACCC CTTCTCTTTAGAGATTTATCAA  
GGGGAT AAAATTGGCGTGATTGGAAACAATGGGT TGGGGAAAAACAAC TTTAATGAAGTTGTTGGCAG GAG  
TAGAACAACTTCCCAAGGTCAAGTCAAGTTGGGGCATAATGTAGCCTTTTTCATATTTCCCTCAAACCA  
CGCTGAT ATCC TGAA GGAT TGTGGCGAAGAAACACT ATTCGAAT GGTTACGCAGACGTAAAACAG GGATT  
ACAGATCAAGAGGTTGGAAGCGTCTTGGGAAAATGCTCTTTGGAGGAGATGACGCC TTTCAAACAAGTTA  
AAGCTTTGTCCGGAGGAGAAACGGCTCGGTTACTAATGGCCG GAAT GATGCTAGA GAAT CACAATATGCT  
CATTC TTGATGAAGCGAACCAACTTAGATCTT GAGT CTGTTTCCGCTTTAGCTTGGGCCATTAATGAC  
TACCC AGGGACAGCTATTTTTGTTTCCCATGACAGAACACTAATAGAT GAGT GCGCGACTAAACTGCTGA  
TCTTTGACAAGGGAAC TATTTCCCTTTTTCGATGGCCGATGTCC GAGT ATTTAGCTAGCCAGAAAAATA  
AATCGCTCATTGTAAGCAGGAAATAATTG GAGT CACGTGGAAGCTCGGTTAGTTTGA GGAT CTTGCTCAG  
AAAGAAGAAAAGCTGTTTTAGAGAGCTTTCGT ATTC CCTTTATTTGTGTATCTCCAGATTTTGACGAACG  
CAGTATTGTTTT ATTC TGGAG ATCC TTTCAAGTATACAAAGGAAC TAGCTTGAACAAAGCTAACGTTGTG  
CGCTCTCAAGGGT TTTTCAGATGCTTTAATTATCACTGCCGATACCGTTGTTGTTTATAAAGGAGAGGTTT  
TCAATAAACCT GAAT CTGAAGAACATGCTGTGGAGATGTTGCGT ACTC TTAGCGCTCTTCTC ACTC CGT  
CATCAC TACGCTTGTCTTATGCAAAATGAAAAAGTCTGTGCGCATCAGAAAAT ACTCAAGTCTCTTTTC  
ATTGAC ATCC CCCCAGCATCTTAAAACCTATGTCCGATCTTTTTCCTCTCTGAAGCGATGCGGAGGAT  
ACTGCGTACAAGATGGTGGTGGGT TAATCATCAAACAATAGAAGTTGTGTATATAATATACAAGGATT  
GCCTATAAAGACGCTGAACCAGTTGCTCATG GAGT TTAACATCAGCTTATGGGACTATCTCGCTAGCCT  
TCATTGGTTTTCTCTCTTTTAC ACTC TCAGCCAGCTGTGATTTTCTTCTCCTCAGTTTCTCAGAGA GAAT CTT  
GTTTTCTTGCCAAAATCAGTCCCTCAAGCTCTAGAAGCCTATCTCGAAGCTTCAGTAACCTATCAACAA  
CACGATTTCTCCGTATTACGCGTAATAGCAGAAT CGTATTTACAACAAAGCTTTCTCTCTGAGGAC ACCC  
ACATACGTAAAAGTGCAATTATTGGAGCAGGGCTATCTGGTTCATCAGAAGCTTTA GAGT TACTGTCTGA  
GGCTATAGAAACGCAAGATCTCTATGAGCAACT ACTC ATTTTAAATGCTGCAACCAGCCAATTAAGCAA  
ACTTCTGACAAACTTTT ATTC AAG GGAT TAACAGCTTCTC ATCC TGTC ATCC GCTTAGAAGCTGCTTATC  
GTCTTGCTGTATGAAAAATAGCAAGGTAAGTGATTACCTT ATTC TTTTATCTACAAGTTACCAGAAGA  
A ATTC AAAACCTAGCGGCAACTATTTCTTACA ACTC GAAACAGAAGAAGCTGATGCTTAT ATTC ATCGT  
TTGCTCTCTTCTCCCAATAACCTGACAAGAACTATGTTGCCTATTTAATTGGA GAGT ACAAAACAAAAA  
GATTTCTTCCAACACTACGCTCTTACTTACAAGTGCCTCTCCTTTAGATCAAGAAGGCGCTTTGTATGC  
GTTAGGCAAACCTGGAAG ACTC TGGTAGCT ATCC TAGAAT TAAAGCTCTAAGCTCTAG ATCC AATCC TGAA  
GTAGT ACTC GCTGCAGCTCAGACATTATT ATTC TTAGAGAAAGAAGAAGCTCTACCG ATCC TAACCA  
ACCTTTGCCAACAAAACTTCTTCGAGCCCTGTATACCGCACGTTTCTCTCGCAAGAGAA GGGT GAAGA  
GCTTCTTCTTCCAATCTTTTATAACGCAACACAAGAAGAAATTAGACT GAAT ACTGCTTTAGCACTTGT  
CATCAA GGGT GTACAG ATCC TCAAGTCCCTCCACTATCTAACAGAAATCTTAGAAAGTAAAGTTCTCCATC  
GCATATTTTTACCT ACTCACTC GACAGGAAAAGCTATACAGTTCTGGAAAGAAT GCACCACTTTTCTCT  
CATGAGCCAAGAAGACAAAATGAGAACGTTGGCTATGTATC GGGT AGCGGAAGATACC ATCC TCTCAGCG  
TTACTAAAATT ACCC AATGACGCTATCTTCTTACCTAGAGCGC ATCC TCGCCTCACAAAAACTATAC  
TAGCAGCTAAAGCTATTGCTTTTTTATCGGTAACAGCTC ATCC TCAGGCACTTCTTTAGTCTCGAAAGC  
TGCATTA ACTC CTGGAG ACCC TATC ATTC GCGCTTACGCTAATCTAGCTTTATATACAATGACCAAAGAT  
CC TGAGAAAAAAGCTGTGCTATAACCGATATGCTGAACAATTAATAGA GGAT ACCATTTT ATTC ACAGATG  
CTGAAA ATCC GCTTCCCTCTCCAAGCTCTTCTTATTTACGCTACCAAGT ATCC CCTGAG ACCC GCACACA

ACTTATGCTAGCTATTTTGGAAACCTTAGTTCCTCCAAAACGGATGAAGATATCCGCGTTTTCTTTCC  
CTAATGAAAAAAACCCATTACAAAAATATCCCGATCTTATCAGGATGTTAATGAGAATAGTGAGTGAT  
CTGGAGTGAAACGATTTTTCCACTTTTTATTGGAGTGCTGCTCGCGCACACTTGCCTCAGAAGGTCT  
TTCTCATCAACAAGCTGTTCAAAAAAAATTTCTTATCTGAGCCATTTTAAAGGCATTACAGGAATATG  
GATGTTGAGGATGGGTATTACATATCCATGATGATCTACGTCTCAAGCCAATAAAGCCTATGTTGAAA  
ATCGCACGGATTGTGGATCAAAATCGTTGCTCATGGCAACGTTATGGTCAATTATCGCGGAAAAATTT  
AATCTGTGATTATCTTGAGTACTATGAAGACACAGATTCCTTGTTACTCACCAATGGCCGCTGTTCTGTTA  
TACCATGGTTCATTGGAGGATCCACTATAACGATCTCACCATCTTCTATTATCATTCATAAAAGGTATA  
TCTCGACTTCTGAAGGTCCTCAGAAACATATTTGTTTATCCGGAGATTATTTAAAATACTCTTCAGACAG  
CGTATTATCTATGGGACCCTCACGTCCTTCTATCTGTAATACGCCGTGTGTTATTGCTTCCTCAAATCTCC  
ATTATGCCTATGGAGATTCCTAAGCCTCCGATTACTTTTCGAGGTGGAGTGGAGGATTTCTGGATCCT  
ATTTAGGTGTTAGTTATTCCTTATATCTAAAAAGCATTGTTCTACGACTTTGTTCTGGATAGTTTTTT  
TAAACATGGAATAGGTCTCGGCTATAACATGCGCTTTTCTCTCAGGAAAATCCAAAGCAATGCCATAAAT  
ATTTAAAGCTATTACGCACATCGATTAGCTATTGATTCATCAGGAGCAAAAGATCGCTATCGATTACATG  
GAGACTTCACTTTTTCCAAAGAACGAGCCCATCTTGCTGGTGAATTCATTTAAGTGATAGCTGGGAAAC  
AGTTGCAGATATCTTCCAAATAACTTCTCTTTAAAAAATACAGGCCCTACAGAAGTTAGCCTATCATGG  
CGCGATAACAATTTATTTGGGAAAAATGACTTCTCTGTCAAAGTCAACTCTTTCAAATGTTAAACAAG  
AATGCGCTCAAGCAATTCCTCATCACCGACCAGTACGTATCAGGCGCTCTCGCATTTTTCTAGAGAATCG  
CTTAGAAGCTGGTTTTTTGGATTTTCATTTTCTAGTAGTAATATTCAGGCTCTAACTTCTCATCATGGAGG  
TTCTCATCCGCTCACAAAGTCTACTGTGGGCTTGTCTTCTTATAGGAACGTTAACCCCTTCGCTATCTG  
GAACTGCTATCTACTATACCCGCATGCTCTCCCAAATGCAGCCCATTTGTCAATTATCTGGATCGCTATC  
TTTTGATTATCGCGTTGCTTTACAAAAAAGAAATATCGGCATGCAAGACATATTGTAGAGCCTTTTTGCTCC  
TTTTTAAAAACCCTCTGCTGTATTATCTCTGATGAGCCTCATATTTTCTCGATTAAAGATGCTTTTTCT  
ACTCTATCAACCTTCTACATGTAGGATGGAGTCAAAGTCTTAAACAACATTCCTCTTTCCACTCC  
TTCGCATCTGAAACTATGGACGACCTATATCTTTGATGAACCTCACGCTAAGGACACTTTCCCTAAAAC  
GCTTGCTGGTTCTCTCTTCTCTTACACTCCAAAATACTTTATCCCTTAGATGCGGAATGGATTTGAAAA  
AAAGCCGATGGGATCATCTCAATGTAATCTGGGAATGGATTTGAATGATAATCTCGGTCTTACTTTAGA  
ATTTTTACATAGAAGTAAGTATGGCTTTATTAAGTGCCTAAAGATAACTACACTCGATGTAAGCCGA  
TCTTTAGACACATTACTAGCCTCTCTCTTTCCGATCGAAGAAATTTGATTACTGGCAAACTTTTTGTTC  
GTCCACATCTCATTGGAATATAATCTTAATCTTCTGTTATGGATGGCATCGTCCAGACTCTCCATCCTA  
TTTAGAATACCAGATGATTCGGGTATAAAATCTTTGAGCACTGGCAGCTATTCCTGTCTACGAAAA  
CGTGAAGCTGATAAGCGCTGCTTTTATCTAAAATTAGATAAACGAAAACAGAAACACCGCCATCCTT  
TTGGATAACAAAAAAACCAAACCTAGTTTGTCCAACAGTTTGGTTTTTTTTCTTATCGAAGCCTCTTTC  
TACTAGAAAACCTATTCCTTCAACATCTTGAATTAATCTTCAACATACTGCTGAGGAAGAGGCTCTCTAT  
TCCTCTCCCTTCCCTAAATAGCTTGTGGCAAATGATAAGATTAAACATCCTAAACAAAAAGCTCCAGCTAA  
CCAAGCGTTACCTTTTTCAAATTTCTGGGGTGGATACTCCAAATACAGAATCTCCGGAATCGACACCG  
AAAGAAGACCCATATCCCGTGCTCTTACTCTCTTGAACAAGAACAAGTCCACACAGAATTAAGCATAACA  
AAAGGAATAAGAACAATAAATGTAACAGAGCAACCACCCATATCCCTCTAAATAAATTAAGTGGGGGAGC  
ATACAAAAAACTAGCACCCCTAAACACGCCATTCATGCCATAGCATGGCGTAAGTATAAGCGAAGCG  
AACAAAACCTTAAAGTCACCAGCTTCAAGAGCACTTATAGCAAGTTCCCTATGAACATAAAACCTCGTAA  
AATGCTGTATTTTCGACGAATCTTTTCTAAGTTATTCCTTGAACGTGTTTTGTTTTGTCCTTGTCTGACAT  
CTATCAATATAACAAGACGCCATGAAGATGATCAGTTTCATGCATTACAATTCCTTGCTAAAAAGCCTTCTA  
AAGCTAAAGAAAACCTGCTGCCATCTAAGTTTTTCGCTGATACTGTAATCTTATCGGGTCTAGCTACCTC  
TCCTCTTAATCCCTGGATGGATAAACACCCCTTCATTTCCATAAACCAACTGCTCAGATTTTTGAGTAATT  
ACAGGATTAATGAATACCCCTAGGAAAATCACAGAAAACGAGTTCCCATCTTCTAATTCCTCTTCTACTC  
CCATAATGAACAAAGAAATACTTTGTCTTACCTGTGGAGCAGCTAACCCACTCTCTATAAAAAAGCCAT  
TGCTCTACTCATATCGAGTACGAGTTGCCGAGCTCATCCGTGATTTTCAAGTTACAGGAGCCGCAACTTTA  
CGTAAAATCGGGCTATCGTAATACTCAAGATCTCTAATCATAATCCACAGATCCCTATACAAAGTCTCA  
AAAAGATAGGCCGTTCCGATAAACCTATGATCTAAAAATTCCTTAGCGTCTTCTGACATAAATTACAGG  
TTATTCCTCCGTGAAGTCGTTCACTGACTAGTATCGTCAAAGTGAAGAAAAGTTTATTCATACAAACA  
CCGAGAAAGTGCTATGAAATCCAAAGACACCTAGAGCAGACATTGTGATGGAAAAGAAGATATTTGGAAA  
GAGAAGTCTTCTTTTCGCTGAATAGCGAAAACCTTCTAAATATCTTTTAAATAAGTGGAAAATTTTCAAT  
ACTCTTCTAAAAAAATGGTCTCGGGTCTGGTCTTCTCTGAAAAACCTAACTGCTCCAAAACCTGAAAGAC

CTTATCTTTTGGATACAGATTTTCAAAGAATTGGCTAACAGCTTGCCTCTTTGACCAAATGCCGCTCGA  
GTCAATGTAAAGAATCTTCTATTTCAGAATCAGCCAATGCAAACCTGCTCGTGAATCTGCATATGGACAA  
CAGCCGAGTGCACACTTGGCTTGGATAAAAACAATTCGGGCTAACTTTAAAAGCATATTGCACATCGGC  
GAAAAAGCTTAAAAAGACCGTTAACGAGCCGTAGTCCTTATCTCCAGTTTGGCGGTAATCCGTGAGCC  
ACCTCATCTTGGATCATTACCGTAACCGTTTTCCAGCGATATGGGCATTCAGAAAAACTTGGTTAATA  
AAGGGTAGTGATATGGTAGGGAAGATTCGCTACTATACGTCTTCCCTTTCCAACCTTTATCCCTAG  
GGATGTCAGAGGGTATTTACAAGCATCCGTAATCTCAATATCCATTGGCAACTGGGACAGAGATCTTCA  
AACATAGGGTCTTTTCCAGAGCAATTACATTGGCCCTTGAGAAAAGTAGAACTTCAGATAATGCTCCGA  
AACCTGGACCAATTTCAAGAACC AATCACCTGGCTGCACTTCTGCTGTTGTAA GAATTTTTCTTAAGAT  
GTTGCCGTCTACCAAAAAATTCGAGACAAAGCCTTCTTTGCTCGCCATTC ACTGATCTCAGAAAAGAA  
GTTAACTGTTCTATAGAATCCCGTGCC ACCCTTCCCCGCTTTTTTATAATAAAAGAAAATAGCTGGGGAG  
CATCTTCTGCAAGAAGTTTAGTTATTGTAGCTGGATCAAATCCGTACCGAGCATGTAACCTATTTTTATA  
GTTAGCCTCTTCTCCGCCGCAAATCCCATCATAAGCTGTTGCTTCAACTGAGCTTCCATCTTATCAAGG  
GGATCTAAAGTTTTTGTAGCACGATTAACAATAACAAAAGTTTTCA ACCCAGACGCATGTTCCGAGAACCT  
TTCCACATCGCTCTTCCAGAAAATGATCTCTTCTAAAGATTGTCGGTGCAGCAACGGACAACCTGAGCATC  
CTCGCGGAAGAATTCCTTCTGAGCACATCAACTGCCCCCTTGAGAAAAGGACCAGCGCAGTCAATCGCTCT  
TTATCCCAAGAAGAGCCTTCATTTAGACGCTCTTGAACCTTCCCTGCAATTTTGTGTGCTAAAAATCCCA  
AACCAGCCTTAATAGTCAATACC GATACGTCCATTGTGTGATCTGGGCAGCCTCGTCAGCAAGCTTTTG  
ATAATATCTCTCGCACCATCCCGGAGTACTTTTTAACATCACACGTGAACGTACCATCATCCCTTCTACG  
CGCTGAGCTACTAAGATCCGATGCACAACGTTAAAAACGCTTCCGGAGT CATATCAAAAAACTTCGCGA  
AAGGAGACAAATCACGACCGAACATCGTCTTCTATCTTTGATTC ACTGAGGTAGGGTCTATAAAAACTT  
CTTAGCCTTAGCATCTGCAGCCATGAGAAATCCGTTAATTACCGTTTCCAGAACCACAGGCCACATAGCA  
GAATAATATTGAGATCTTGCAGATACA GAATCTACCAACTGCGGGCAAGTC GAGTAAAAAGAATATTCA  
ACTTGC GAATCACATCTAAAGTCGTGACGACAGTGTCTTCGTCTACCTTAAATAAC ACCCGATTATGGAT  
GGCTACTCCAGAAGGATTTTTGCTCAAAGGAACCAGACGAGAAAAGCTCCCTCATAGCCAAAAGCGATTCCA  
GAAAAAATCGTGATCCCTAGATAGCAAGCTATAACAGCACGTTTCACTACTCGCATCCCTTGATTGTAGT  
TTTTAGGTAGAAAAACCTTAAAGAATTTTGGGTGTTCCCTCCCTTTTTCTTTGGATCTTACCGCCTC  
CCTAGAGATGTGGCAAAC ACCCAAACAAGCAGCTTATATTC TAAAAAGAACCTACCCTCGTCTAGGT  
AAAAGCTATAGGGGAGGAGGG ACCAGCCGTCAGAACACTTTTAAACAAAAAAGCGTTATATCC TCAAGCC  
AAAGGAAACAAAAATGTATTTTTTGGGAATTTTTTCACTTAAATATCGAAAAGAGGGTAACTAAGAGCA  
AAACACGCTTTAGCTGAGTTGAGACATAAACTCATAGAAATGCTCTAAAGAAGTAAAAATCTTACCACA  
ATCCTTATCCAAGAGATAAATTTTTGTTGGAAGCCCTCTTTTGAAG GAATCAATCGTTTCTCTCCCTCT  
GGAAGATATGCACTTAGAATCTCACGATCTTTGGCAGTCAACCAACCAAGGAAGTATGGGGAAGAAAA  
TCCCTTTAAAACAATCTAATACCTGTGCTCTATCCCTTCAATTCCTAAAGAAATAAAAATCTTCTGATG  
TTGTTGGAAAAATACTCTTGAGCTGCAAGCAAACCTCCAGAGAGGAAAATTTATGTTTTGCCACTTT  
CCTTGAACGCATTGTAAAATGTCTCTGCGAACGTTAGATAATGTCGTTTACCTGAAATGATATGCAATT  
TCAACAAGCCTTGGCAAAGCAAAGCATTGCTCGATATAGCGTCCCATCTACAAAACAAGCTTCTTTTAT  
CAACAAAGAAGAATCCCTTCCATCCGTGGAATAAAATCCCTGTATCGGCTCGGAAAGACACCAACT  
TCCTTCGCCAGCTCTTCCAGCTAGCACCAACCACTTAGCCCCAGATCC TATTTCAAATAGAGCTAAAGCTC  
CCATAATCATGGCAGCATAATCCCTCTAATCCGTGCA GAGTATTTGGACTCTCCCTGTCTCCATCGACGCA  
TAAACGGCCATTCCTTATACAGATTGTTTCGCAATAAACTCTCCACATCTCTGCCACCACAAAACATTCCT  
GGTCTCCTAGAA GAATCCCTGTTTTATCAGAGAAAAGATTC CCAACCATTTTGGAAAGTGAAAGACT  
GATCATCTTTGGAAGCTT GAGTTTTCCCTTCCCTATAGACACATAATTTTTCTCGTGAAGCTTCTAATTT  
CTTCTGAAATTC TTCCAAGAACAATGATAACGCTTCAATCTCTTTTCTATTC ATGTAAGGAGAAACG  
TGTAAGATATTC CGTCCGTTACAAATTCCTTCCCTAGACACATCATAGTACTCGAAAACATCTCTGCTT  
GCTCTCCTAACAGAGAGC GAATCTCTTCCCGGACCACGTGTACTGGCTATCAATATCGGTTCTGCCCCA  
CTGTTGACCGTATTCAGAAAGATAAAAAGATCCGTGATTTAGGATCC GTTAGCTCTTTAATTAATAATTA  
AGAACC GTTTGCTACAATGACGAATCCGGATTTCTCATATATACGCCGGCTTCAGTATAAAACAAGCA  
TCATAAGAGCATTGTCAAAGCTCGCTTTTCAAAGCAG GAATCAACCAACGATCATCTATAGTGTAAACG  
GAAAAACCTCCCGCTAAATGATCAAAGATGCCCCATTTGCCACAGATTGTAGAGATCTATTCACGAAA  
AAAATAGCCCGACTATCTTGATACTCTGCTCCTACC GCAAAGAAATAAACTAAGCA ACCCAGGCAATG  
TCTTAGGAAATGACTTCACACCTCCAAATTGCGCATCCACGTGCGATAAATAGCTTCTGTCA ACCCTCTT  
TAAGCATTCCTTCTAAACACTCTTTTTTACAAGAAC ACCCTTCTAGAAAAGCGGCTACTTCAAGA ACT

CTTCTGCCTGTTGAACAAATACCTCTCTATCCCTCTCGATCTTCCACATGATATGTAGCTTTTCCAACA  
TCTGGACAAAGGACGAGGCTCTCATTTTCCCTGCAAAGCTAGCATATCCCAAGCTAAAGAAAGGCAAGAG  
ATTGGGGTGAGGAAAACATTCAGAGGCCATGTTGGA GAATCTGTACCTCTCCGGATACGGAAAGCATC  
TGAGATAATTCGAAATATAGATTTGCCAGATGAGGCAATTCCTCTTATCTACCTTAATACAAAACAAAT  
ACTTGTTTAAAATCGCTGCAACTTCA GGGTTTTTCATAATTTTCTTAAGCATGACTTGGCACCACCTAGA  
GTGAGTGCACCCATATAGACAAAAAATCGGTTTATCCCTCTGCAGAAGCCTTTTG GAATGCTTCTGCCGAC  
CAA GGGTACCAGTCCACAG GAGTATGAGCATAAAGAAGAAGGTATGG GAGTTTTTCGGTAATAAGTTTAT  
TTGTGAAAGGCTGGTCCGTCGTCATGATAAAAAATAAAAAAACAAAAGGTATACTTTTAAATTTTAAAAT  
CAAAAACATACTTTCTAAATATTTTACTCGACAAAACCTAATAAAAAATGGTTATAAACA ACCCAAAA  
TCCCTTTTCCCTTCATTTTCTAATAACTAAATAGG GAATTC TTGATCTTAAACTATAATAAGCGTTACCA  
TACGTCCTTTTATTGCC GAGTCTCTTTACGGAA GAGTGGCAGAGTGGTC GAATGCATCTGATTCGAAATC  
AGAAGTCCCTCAACGGGGACCGGGGGTTC GAATCCCTTCTCTTCC GAATTTTCTTAECTATCTTATCTGT  
AACCTTTTACCTTTATTAGGCGTGGTAAATACGCTTTTTTGGTAAAATGGAGGGGT TGGAGGAAGAGAC  
TTCTTCTAATCCCTCTCTTCTTCTAAA GAATTTACAAATTTTTTAGTTTGATAGTAGAAACATATGCCTGTA  
GTACAGAAACCTTCAGTTTTG GAGTACGCTCCTGTTTCTCCTTCTACGACTTCTGATTCAAAAATACCAA  
ACCACCGATCTGGAGCCTCTTGTATCAAGATCTCCATGATTTTGGCATGTTCTCTTCTAGCGGTCCGCAT  
TATTCCTCGCAATAGCCTTGCTTGCTTCCCTGGAACTTGCCTATGTCTTAGTAGCTGGTATATTAGCT  
CTTCATGCCGTTTTAGCCCTTGCTTTAGGAT TATGGATTTCTCATCAACCAAGCATGCACTACT GAGTG  
AAA ACTCCGGTACCGAGCTGATTACAACAAAGAAAACAATAAAA ACCCACTCAACCCAGAGATCTTTTA  
TGGCTACACCGATTGCTGTACCGCCTTCTTTCAGCGTCATCACAATCTTCTCCGGATGTTTTCCCCACATTC  
ATCTTCCGCTTCTGCTAAAATGCAATATAACAACATAAACAGGGAAGACCTTGGCCTGTATAGTAAGC  
CAAAATCGCTCTTTTAAATTTATGA GAATTTCTCTATTATTGTGCTTGGATTAG GAATAGCGTTTCTGGCAT  
CGAATCC TATGTTAGGATGGAGCCTGCTTATTGCAGCGATT ACCCTAGTGATCTCTTCTCTATTATGTGC  
TATTGCAATCTCCGCTTACCAG ACTCTAACTATCCGAAAACATAAAGCGAAGTCTCTCACTAGAACGC  
CAGTCTGGCGTCATCTTTATAGAAGAAGGTGTGGAAGACGCCCTTCTGTCTTTGAGAGTCCATTCGCAG  
GAT TAGAAGATGACCTCGTATCTCCTATCTCTCCACC ACTCTCTCCTGAGGATCGCTCTTATAGATCATC  
TGGTGATGCAAGCCGAAGCTAGAAGCCTCGAAGAGCACTGCTAATGCAGCTTGCTCTTCT ACCCTTAGAG  
GGCCTTGGACAGAAGGGCTCTCTTCGGAATACTTATTTTCTGATAAATAATCTTCTGACAGATCTCCT  
TGAACTACAAGAGCGATCTTACAATTTTACCAATAAGAAAAGGTAAA ACTCTCTATTTTAAAAGCTCCGA  
CTAGATCAAGA GAGT TTTGAACTCCAAT ACTCTTCAGAAAACAGGCAAGCCATAAAGCTCCTAAACAGAG  
GCTA ACCCTCCGCCAACGAACAAAATCATCGCGACA ACCCAGATTTTGTCTCGGATCTTCCAACTTA  
CCATAACAAGAAATGAGCGCTACTGCAGGTACAAAAGAAAATAGAT ATCCAGCAGTAGGTCACAAA  
ACACTGCTATCCCACACATAGGACTACAAAAGACAGGGAAGAACA ACCCTCTAACAAATAGGCCACTAC  
TGTCGTAACAGCCATCTGTGGAGT CATAACAAGCCCTAAACAAAAT ACCCCAGAGTCTGAAATGTAATA  
GGAAGTGGGGTAAAAGGGGAGACTTATACTGATCTTAGCTAAACAAGCTAAGAACAAGG ACCCGGCAATAA  
CCTTCACAAAAGGAT TACTTATGA GAGT TTTCTGAGTATTC TTTAGTAATGCTCTTAGCAACCAT ATCCCT  
TCCACAAATTCACCGAATCGATACTAAGGTATCCGGCCTTTAAACCAACTACAGAC ATCCTTCAACTTCC  
TCTGAAGTTTTGCCTAGATAAGGATAGCTACAGAAGGAAAAAAGCAGCCGCACCATAATATAAATATGGC  
GCGAAGCTTTCTGGAAACGATCTCCATGGAGATTT ACCCAGAAAAACTTTCTCCAGTCTAAATGAAAGGA  
TTTTTTAATGCATGCAAAAATTTTCTTTGCTTTCC TATTTCTGCTCTCTCTTCAAGATCGC GAATAT  
ATTGCTCCTTTTTCCAAGCCC ATTC TTTCTCGGCTTTTTCTCGCTCCCAAGATAATCGTTCTTCTTTAAA  
AGCCA ACTCTCTTTCCCGTAATTC TAAATCTTTTCTCTCAAAAAACTTGCCTCTTCTTCTTTGCGCTGA  
AAAG ACTCTGTACATTGCTGTAAAGCATTGAGAAGCTTTTTATCATGC ACTCTACTAATCATTGCGCTCT  
CTTCCACACGATCTCCTATCGTTTGTCTCAGAGATAGGCTGTTCACTACTAGACAAA GAATCTT GAGTAGA  
AACGTCCTCTAAAAAATCCCTCT GAATCTTTTTTTCAGCAAGGATTTTTTTTAAATAATTCACAAAATTC CAAA  
GAATCTGTTACTTCATCGAATAAAGACTCATAT ACCC CAATTTCTTTGCATATTTCTTTTGAATCTCAA  
TAACACGCTGTTCTTTCTTCTCTA ACTCCAGTTGACTGTTGGCTG ATTC AACTGCTGAAAT GAATGT  
CATCC TTCCATTAGATCC CCTATAAAGGCCCTCTCCGCTACTTTCCAGTGTAAGTACTAGCAAGCATAAGCAA  
CCGATGGAACCAAAACA GAATGCTTTTCTCATAAATGTAGTGAAATCTCCCTATT GAATATAGACACAAA  
AACCC TTTATTACCTCTGTAAAAAGACGTAATAAAGGGCACAGTTCATCTCATTTTAGAAGACAGATAGG  
CTTTTCTATCTGCCAAAATCAAACCTTATTATTTAGTGATGATCC TCACTATATCACTGCCGGCATAACGC  
TGAGAAGCTCTGTTTGC AAAGTAGCCCTACAAGCTA GAATGTCTGCTA ACTCATCTCTTCTCTGCAATC  
TCGTATAGAAAGAGGTGGACGCACCGCATCAC ACTCAATCATTTTCTGAGCTGCCATTAGAGCTTTGATC



CCTAAA**GGATTC**GTAGATAAGTTGAGCCAAGAACAACACTTTCTTCCAAGCTTCAATAGGACGACCTAGAG  
CAACATAATCTCGAGCTA**ATTC**TGGCCAAACGTTAGCTAGTACAGAAAT**ACTC**CAGATGCTCCAGATAA  
TCGCATATCTGGCCACAGATTGTCGTCACCACAAAAC**ACTC**TCA**ATCC**T**ACTC**AGCAAAAAGCTCACAA  
GCCTGAGCAG**ACCC**TCCA**GAATCC**TTA**ACTC**CTATGCACAAA**GGAT**GTGATACAAAAGATTTACGACCT  
CT**GGAT**ACAAAGACACGCCGGTAC**GAATAGGAT**TGTTATAAA**GAAT**GATAGGCTTCTACTTAC**ACTC**AA  
A**ACCC**TATCAAACCAAGCTTTTTGTCCATTAAGCCAGGTCTCGTATAAAGAG**GAGT**TGGAACAAGGA**AC**  
**CC**ATCTATAGGCCAT**TGCTGTGCAAAATCAATCC**AAGACATAGTTTCTTGAACAGACGTTGCCGTC**ACTC**  
CTACAAATATCGGCAC**ATTC**AAGTTAAGCGTAGAAACAACGAAA**GAAT**AGAAAAGCTTCTCTTACATCGT  
TAGAGACA**ACCC**CTCTCTGTGCTACCAATAAAAAAATGCCGTTACCGGCGTGCTCTTGCGAACGAACG  
AC**ACTC**TCTAAAGCAGCGAAATCTATAGACAAATCAGCCTTAAAAGGTGTAATACAGGCCCCCAAGAC**AC**  
**TC**ATAAAAT**ACTC**CTATTTAAATAGGCAATCGTGCAACA**ACTC**GGTTACAGCG**ACCC**CAAA**ATCC**TTATT  
AATAATTAATTAATAACCGT**ATCC**GTTT**ACTC**CAACATAAAACTG**GAGT**TCTGTGTAGAGCCTCAAAG  
**ACTC**TAGACATA**ACTC**CATGAAGCTAGCTTCGCTCCACTAATGCAACTAAAGATAAAGGCCCTCACAA  
TTACTGTACCAAAAGCTTCAAGAGCCTTGTATAGCCTGAGGATA**ACTC**TTCCAATCTATAGTGAATA  
**ACTC**CTAAACTTTGAGCCATGACA**ACTC**CTGGAACAA**ATCC**CAAGCTTCGTACACA**ACCC**AAAA**ATCC**  
TCTAGTCTCACTAGAGGA**GAAT**TGT**ATTC**TACAAACCAAGAGCTTG**ATTC**GACTTCAATGA**GAGT**GCTT  
TGATCACAGG**ACCC**TCTGT**ACTC**TCATTTAATGAAGCGCAA**ATCC**AAGTCCCTTCTTTGGTTACATTA  
TGTTGAAGTCAAAAAATAGGCACCTTCGCTCGAACACAAGGCTTTAACATATCTTGGTGCAATACCTTA  
GCACCAGAACCTTGCTA**ACTC**CTGCATCTCTTCAAAGGTTAAA**GAAT**CTAT**GAGT**TGTGTATCTTTCAAGA  
TTTTT**GGGT**CGGCTGTATGCACGCCACAAACATCTGTATAAATACGCA**ACTC**TCTTGCTTTACACAGTTC  
TCCTATCAGAGAGGCAGAAAAGT**ACTC**CCCCCTCGACCAAGAACTGTAGTTTTCCCTGAAGACGTTGCT  
CCAAGGAAGCCTTGCATAAGGTAAATAGCATCTTCTTGTAAATGCCA**ACTCACCC**CAAGCAGTTTGCATCA  
AAGCTAAATCTGGAACCGCCCGCAAAAATTGC**GAGT**CGGTGA**GAAT**TACTTGACGAGCTTCTAACCGCTT  
AAGCGGTAACACATAGGTACAGCAGTAGCTACAAATCAAAGTCGAAGATAA**ATCC**TCACCTATAGCCAAA  
**ATCC**TGGCTTGATCTTCAGAAAGAAGCTCTTCTACATCTTCAAATGTTCCAAGATCTCCAAAAGATAG  
CTAGAGAAACCTCTATACCTA**ATTC**CTTTGCTATTG**ATTC**ATGTCTTTCTC**GAAT**CTTTTCAGTCAATGC  
CGCTCTTTCCCTTTAGGAAGCCGACAAA**ACTC**TTCTAACCA**ATCC**GTAACACCAGCTACTGCGCTAACA  
ACAACAAAAGAAGGTCTTTCTTCTTGTATAATCTCGAA**ACTC**GTC**GAAT**ACTTTGGGCTGTGCCACAC  
TTGTTCCACC**GAAT**TTACACACAAGAGGAGCTGTTTTTTGTCTAAGCATAACGTCAGCCTCTCTTGATGAA  
**CGAATCC**TCCTCTATCTCGGAAAAG**ATTC**AT**ATTC**GCTATCAAAGCTCCTGCAGCTCCTCGAACCAATT  
GTGCAATAAGATACACATCTTAATAGTTTCGCGTATTACC GCCGTAAGAAATGGGCCCTATATGTAATCGC  
ATATCATCATGAGCTAG**ATCC**TTTCGAACCTGAG**GAT**GCCAAGGA**GAAT**CATAAAGAACATAGGTAGCC**G**  
**AATCC**TTCTCATAACAAGAAGTTATCTCTTCAAATCGACCTCTTGATCAAACATAACGTGTACAGAGAT  
GACATGCCCATGTGCAACAGGAACACGATGTACAGACGCAGTTATAGAAA**ACTC**TGCAGGAAAACCTGGC  
TGTCTTAAATTTTACAGTCTCTCG**GAGT**ATCTCTCTTCTCCTCCTAAGATATAAGGCACAGTGTTC  
CAATTAAATCTAAAGAGGAA**ACTC**CAG**GATATCC**AGCCCCACTAGCTGATTGTAAAGTGATAACATGCAC  
ATGCTCGATATTAACAACAGCAGTGGCTTAAGAGCCAGAGCAATGCCGTAACACAACAATTA**GAAT**TG  
GTAATAATCTTACCTAAAAAAGGCTGTTCTTCTAACAGAGACAAATGATCACTGTTTATCTCAG**GAAT**TA  
AAATAGGAACCGCTTTATGCATACGATAGGCGGTGGCATTAGAAAACACTATCTTTCCCGAAGATAAACA  
AGTAGTTTCTGCTGAAAAGCGACAGACGAAGGAAGACAAGATACAACAATATTTG**ATTC**TATCTCTTCA  
ACGGAGC**GAAT**AGATAAATCACGAACAG**ACTC**TGGCATCTCCATTAATGGCTCTTGCCATAAACAAGCAG  
**ATTC**GTAACGCAACGCATGCTTCTCAGAAGAAGCTCCTA**ATTC**AGCAATTTCCCACTGTTTATGATTTTG  
TAACAAAGCAATAAGCTTTTGTCCAACAAGGCTGTAGCACCTAAAATCGCAATGCGCATCGT**ATTC**TT  
AGCTTTTAACCAAAACACCTTTTCTTGAACAA**ACTC**TCATACAAAACATCTGAGGTGTAAT**ATCC**TTTTG  
GCAAGCCTTCTCCATAATCTTCTCCAAGATTAGCAAC**ACTC**CATCAGAAAAACACGTCGAGAAAAGAC  
TTCGTGCC**GAAT**TACAAAACGCTCATCTTCCCTACAAAAGATACTTCATGCTCGCCACAAAC**ATTC**CCT  
AAACGAGAACCATGCATTTGCATAAAAGGCTCTGGCTCTTCTCACAGCTCTCTGCCTTCGCAGAAC**GGA**  
**T**AGCTTCAGCCAAAGAAATCGCTGTACCAGAAATGGCATCTGCTTTAGCACGGTGATGTGTCTCTAAAT  
ACGAACATCATAAGAAGTGCTAAAAAGTTTTGCAGCAAAGCTGCTAATCGCTTTTGTACATACGCCCC  
AA**ACTC**GTGTTTGCAACAACAACAGGAACAT**ATTC**TGATAATGCTGATAACTTTGTTTTTACACCGC  
TATCATTAGTAA**ATCC**TGTAGTTCCAATAATCACAGGCCTAGGTGTTTTTAAACAAAAGTCTAAAAGCAG  
CGACGCTACTTCAGGAGACGAGAAAATCAATAA**GAAT**ATC**ATTC**TCTGTAACAACCTCTTCTAGCGAGGTC  
TGAGATCTTCTTGAAA**ACCC**CTTCCCAAAAAACAGTGAGGACGACAAAGTAAAGCCT**GAGT**CAATAAGA

CACCCATCC TTCCAGTATCTCCGACAAGGCCTATGCTTTTTTTTCATAATACTATCAGCAACTC TCATCCA  
CCATTGTGGAACCTATA GGATCC TCTTAGCAAATGGCTAAAAGAAACCACTGCAGCAGTATAGTATAAGT  
GAGTAAATAGCTCCAACAGGAAAAGCAAAGCAAATTC GCAAACCTGCTCTTTTTCCTAATTTATTTAGAG  
AAAGAACTTTAGATGTGCACCT GAATATTTTTGTACG ATTC TACAAA GAATCC CCATCGACCTCAAAA  
GACTC TGCAACAAGATCAACTATGATGTCTTCTGCATCAAAATCACATGCAGAAGCTCCCTGAACGATCA  
CACTTTGTGGTCT GAATATAGTACGAAGTTAATCAGCTGTTTATACAGCCACT GAATAAAATCGCTG  
AAGATACATGGTAATACTAATTCCTAAAAGGACTCCTCCTATAGCTAAAATACCTCCAGATATAGGAGCT  
AATCCAGGAATTAGAGTTAAAGAGAGA ACTCCCAAACCAGCTAGAA GGATTATGGTAGCAACTAAAATAG  
ATTG GAATCTTTCTCCTTAGTTGCTCC ATTCACAT ACTCAC GAATAGCTTGCTCTGTTTTGAAAAATCAC  
CGGTTTCCCAACTA ACTTCCAAGTTTCTTCTTGGCTCCTTCTTGGAAAGCAAGCTTGACGGCTTTC ACCC  
CATCGTCTATT ATCCATTTCCCTTATCATGCGCTTTCAAACGAGCTTCTCTTCTACGAGCTAAACTAA  
TCTGTAATCTAGCTTTTAGTTGATGAGCGACATGAACC ATTC CAGAAACAACCATTGGAACAGCTGACAA  
TAATACAGCTCTTCTATAGAAAATAGGAGCAACACTTGTACAGCAGGCAATCC CCAAATCCAGCCAAT  
AAAGTACAAGTA ACCCCTGCTAGCAATAATAATCC TGATAAAATCA GGATCCGCTGTTGTTTTCTTCGTTA  
AAGACAATGCTGCATCTATTTCTCCTTGAGGCAAACTTCAATAGAAGGAAGATTAG ACTCTCTA GGATC  
GACTACCACCTCTATATTGTTATCT ACCCGATAACTGAAGTCTGCTTGAGAAATGTTTTTTAGTTTAGTA  
TCAACAAGTAAATCTTGATCTTGTGAGCTCTAGCAAAAGCTCTCCATTGCCCTA GAGTTGTGTGCAGCA  
TATTCGAGATCACTAAAGAAATCCCTAAACTGATTAAAGGAGGAGCCAACACTATAAGAGCTGTTGCGGC  
CCCTCCAGTTACAGCAA GAGT TCCAACAACAGCTAAAGCAATCCCTAAACACGCAAAACCAACTCCTAAT  
AGAACTAATCCATTCGCTAGCTTCCGTATCTTTGCTCCTTCTATGAGCATCTCTTCTG GAGT AAGAGCTT  
CACCCGATGCAGCTTTTTTTGACTGGAAAAGCGCACATAGAGATAGTGAGCGAACCC TGCAAAAAGAGC  
TCCCTCCTTTTATTATAAGAAAC ATCC CCAAGTTCCCGAGAGCGCTACCAT ATCCCCAGGAATATAA  
GAAGATCCAAGTTTCAGCACAAGACCAGCTCCCGTTA ATCC TGACCAAGGAGAGCTGCGCTCTTTGCC  
TCTGTCT GAATGTCATTC TCGGAGCAACTACGGTCTTA ATTC CATTAAATAAGACTTCTTAACGTGTAAC  
TC CACCGACAGAAATTCCTGAAAAGCAATCGCTAAAACAATCGATTGCGGA ACTC CAGGAGCTAGTATC  
GTTAGGGCGATAGCCACAATTGCTAATGCA ACCCCTAATACAACAATACCTGCAATGAGCTCTGTG GAAT  
ATTTTAGCGTTTTCCCTGATTTAGAACTGTTTCATTAGGGAGATAAATCGCTGATACAGAA ACTCCTGA  
GTCTGATTTTGTACAGGAGAAAGGTTACTAAGAGCATTACATCAACAGGAT CACTACTTCCAGGAACC  
CTAGAAACCATAAAAAACCATAAAATCTTTCAACAAGATTAATTATAACAACAAAATAAAATCC TTTTCA  
TAACAAAAAATAGAACTTATTTCCCTCGTATGATCTTAAATATCATGCAAAAA ACTCTTCCGAAGACTA  
CATTAGCT ATTCATTTTTAACCTTTTTAGAAAATAGACATATGGTCTCTTTCGAACCAAGCCCTCTTATT  
TCTCCCTCAATTCCTTACGGAGAAATGCTGTTCTCCGTCAAAATCAC ATTC TCTACGCGG ATCC TTT  
TTGCCCTTATCCAAAGGGACCTCTATCATAGAAAACGTCTCTCTCTCCCG ATTC CCAAACATATGCT  
TACAGCCTGTGAGAAAATGGGAGCTCACGTTAGAA GAATAGGAG ACTCCTTACAT ATCCAGGG GAATCCC  
GATCCCATCACTGTC ACCCACCC TATTTCCATATGGG GAATTC TGGTATCGCCCTTCG ATTCCTAACCCG  
CCCTTCTACTTT ATCCCCACCC CCACTTTGATCACAGGATCC CACAC ACTCAAACGACGTCTATAGC  
GCCTTCTATCAAGCTTAAACAGCTTGGTGCAC ATTCGCCAAAAACATCTTCTTCT ATTCCTTT  
ACC ATCCATGGTCCATT ATCC CCTGGCCATGTTACTATCTCTGGACAAG ATTC CCAATACGCATCAGCAT  
TAGCAATCACTGCAGCTTTAGCTCCAT ATCC CCTTCTTTTTCTATCGAAAATCTTAAAGAACGTCCTTG  
GTTTGATCTGACCTTAGATTGGCTAC ACTCTTTAAACATCTCTTCTTAAAGAGACCAAG ATTC TTTAACT  
TTCCCGGAGGACAATCATTAGAAAAGTTTTCTT ATTC TGTGCTGGAGACTATAGTTCTGCTGCTTTTT  
TAGCTTCTTTGGTCT ACTCTCTTCTTCTTAAACCAACT ATTC TCCGTAATCTTCTTCTCAAG ATTC  
TCAAGGGGACAAGCTTCTTCTTCTTTATTAACAACACTTGGAGCCCAT ATTC TTATTGAAAAACATCAT  
ATCGAAATGC ACCCCTCTTCTTCTCCGGAGGTGAAATTGATAT GGATCCATTCATAGATGCATT ACCCA  
TCC TTGCTGTCTCTGCTGCTTTGCAAAAAATCCATCGCGCTTGATAATGCGTTGGGAGCAAAGGACAA  
AGAAAGCAATCGCATGAAGCCATGCCCAT GAAT TGCAAAAAAT GGGTGGTCTGTCC ACCCTACTCGT  
GACGGTCTATATATAGAGCCCTCGCGTTACATGGTGCCTGTTGATTCTCATAATGATCACCGTATTG  
CTATGGCTCTCGCTGTAGCTG GAGTTCATGCCTCGTCCGGACAA ACCCTCCTCTGTAACACACAGTGTAT  
AAATAA GAGT TTTCCACATTTTCGTGATTGCAGCGCAGACACTACATGCCAACGTTGACACTACCAAGCA  
GATTTTCTTTTGGCGTCTTCTTCTGTAGGTA AAACTCGTTTGGTCAACATTTATCGCAATTTCTATCG  
CTGCCTTTTTTTGATACAGATCACCTTCTTTCAGATCGTTTCCATGGAG ATTC TCC TAAAACATATCTACC  
AACGCTATGGAGAAGAAGTTTTTGCAGAGAA GAATTCCTTGCCCTAACTAGTGTACCTGTC ATTCCTAG  
CATCGTAGCTTTAGGAGGCTGT ACCCCTCTTATTGAACCATCTTACGCCCATATTTTGGGGAGAAACAAT

GCTCTCTTAGTCTTACTCGAACTCCCATCGCTACACTATGTCAACGCCTACAACATAGATCTATTCCTG  
AAAGACTTGCACATGCTCCATCATTAGAAGATGCTTTGTCTCAACGATTAGACAAACTACGATCCCTCAC  
ATCAAATGCCTTCTCTTTACGAGCAGAGACTTCTCTGAAGCTGTGATGAGAGATTGTCAAAGCTTTTGT  
TTGCGTTTTTTGAGCACAAAAGAGAGCTCCTATGCATAATCAATATGGCTCCATATTCCTCTATCACTACT  
TGGGGA GAATCC CATGGCCCTGCTATAGGCGTCTAATTGATGGGTGTCCTGCAGGTCTCTCCTTATCAC  
CAGAAGATTTTCTTCCGCTATGGCTAGAAGGAGACCAGGGCAACTTCATACTTCTCCTCGTCAAGAACC  
GGACCTAGTCACTATTTTATCTGGAGTCTACCAAAACAAAACAACAGGA ACTC CAATCTCTCTTCTTATT  
GAAAACAAGGATGTATCCAGCTCTTCTTATGAACATCTACAACACTGTTACCGACCGGGGCACGCACAAT  
TTGCCTATGAAGGGAAATACGGATTTGCAGACAACCGTGGAGGAGACGCGCCTCTGCTAGAGAGACCGC  
GTCTC GAGTTGCTGCTGGTGTGATTGCTAAAAAGATCC TTTTATCTCAAGGAATCGAAACACTCGCATTC  
CTTTCTGGATTCGGCACCTTAGAGAGTAAAAATTATCCCAAACCTTCCGACTCGCTAATAACAACAGGTT  
ATACCTCTCCTTTCTACACACTCTTCTCAAGAAGAAATTCAGAAATCTCCTTCTGCTTAATCCTGACGA  
CTCTTTTGGAGGTGTAGTCTCTTTTATCACTTCTCCTTTACCTATAGGCCTAGGCGAACCTGTGTTTGGGA  
AAGCTTCCAGCTCTTTTAGCTGCAGGCATGATGAGCATCCCTGCGGTAAAAGGATTTGAAATAGGAGCCG  
GTTTCTCTTCATCACAAATGACAGGCTCCGCCTATCTAGATGCATTTATTGCTGATGAAAGTGGGTGTC  
TCTTCAAAGTAATCGCTGTGGAGGAGCTTTAGGGGGGATTAGTATTGGGCAGCCTCTTGAAGCCGTGTA  
GCCTTCAAACCTACTTCACTATAAAAAAACCTTGCTCCTCCGTTTTAAAAGATGGCACACCGATCGCAT  
ACCGC ACCCTAATCAAGGACGCCACGATCC TTGTGTAGCCATTCGAGCTGTTGCCGTTGTTGAGGCTAT  
GCTTGATTTAACTCTAGTAGACCTGCTTCTCCAACATCGTTGTACCCAAATTATGATCGAACTCGTTACCG  
ACTCTCCTCACCTTATTCACCTAGTTGATTC TTTACAAAACCTTAAGCTGTTTGTCTCGTTGTCTACCGA  
CTTCCCTCTCATTTTTATAACCAATACTAAGCTCAACACTCTTATCC TACCTCCTCTATTAGACTTGGCT  
CGCTCACTAGGATTTCCGTAGAAACACTTACCATTCCTGAAGGAGAAGAAACCAAGACGGGCGATACTT  
TTCTATCTTTGCACCAACAACCTGACAGATCTCAATGTACCTAGACAAGCAACTTTAATTGGAGTAGGTGG  
AGGCGTAATTTTAGATATAGCAGGCTTTGTAGCTGCCACACATTGTCGAGGGATGCCTTTCATTGCTATT  
CCACCACCTTTAGTTGCTATGATTGATGCTAGCATTGGAGGGAAAAATGGCATTAACTTAAATCATATAA  
AAAATCGCATCGGCTCTTTTTATCTCCCTAAAGCTGTATGGATCTGCCCTAGAAA ACTCTCTTTTCTTCC  
TCAGCAAGA ACTC CATCATGGAATAGCTGAATGCATCAAACATGCTTATATCGCAGATTC TGCCATCCTA  
CCTCTGCTTCAAGATCC TAATGCTTTAAAAAAGAAGACAAGCTGTCTCTTCTTATCAAAAAGAAGCTGT  
TCTGCAAAGCTTCTGTAGTACAACAAGATGTCAGAGACTATGCAAAACGCCAAATACTAAACTTTGGGCA  
TACGCTAGGGCATGCTCTGGAAATGCTATTTATAGGGAAAATTC CCCATAGCTGTGCCATAAGCGTGGGA  
ATGGTCTAGAAAACAAGCTATCTCTATCC TTGGGAGTTGCTCGCTCTCCAGCTATACTACATTC TTTGA  
TACAAGACCTTTTAAGATATCAGCTCCCTGTTTCTCTAAAAGATCTTTATATGAGAGCGCAAATACCTCC  
ACATAATTGCGATCAAATCC TCTCCGCTCTCACCTACGATAAGAAAAACAATACTCCCTTACCACCA  
TTTGTGATGATAGAAGAGATCGGACTAGCAGCTTCTTTTGTGATGGACGATTTTGCCAAACTATATCTAAAC  
ACATTC TTACAAAAGTCC TGGAGGAA GAATTC TATGCTATGCACAACAATTAGTGGACCTTCTTCCCTGG  
AAGCTAAGAAGCAGATACTACGCTCTTTAAAA GAATGTCATTGCTTTGAAATGCGGGTAGATCTTCTTTC  
TGTATCTTGTTTAGA ACTCAAGAA ACTCATGGAAC TAGCTCCTATTTCCATTC TTGCATGGAAAAACCT  
GAATCATGCTCACAAGCAGACTGGATAGATAAAATGCAATCGCTAGCTGAGCTAAATCCAAACTATCTAG  
ACTTGGAAAAAGATTTTCCAGAAGGATATGATACGCATTCGACA ACTCCATCC TCAAATTAAGATCAT  
TCGTTCCTTACATACTAGTGAGCATACCGACATTATACA ACTCTATGCACATATGCGATCTTCAGCAGCT  
GACTACTATAAATTCGCTGTTTCTCTTCCCTCAACGACAGATCTCCTAGATATCTGTCACCAAAAACGCT  
CTCTTCCCTGAAAATACAACTGTAGTTTGTCTAGGAGGAATGGGGCGCCCTTCCAGAAACTCTCCCGAT  
CTTACAAAATCCATTTACCTACGCAAGAAGTACA GGATCTTCCCCGTAGCTCCAGGGCAATTTTCTCTC  
AAACACCCTATTTCTACAATTTGCAAGCCTTTCTGCTCAATCC CCCATCTGCGCTCTTATAGGAGACA  
CTTACGAAGTATCGGGCATTAA ACCCATAATCC TTTCTTTTCCCA ACTCGGAGTAGCTTGCCCATATAT  
TAAACTCCTTTAA ACCCTCAAGAGCTCCCTAAATTC TTTCTCTACCATTCGACGCA ACCCTTTT TAGGA  
GTGACGCTGACTTCCCATTGAAAACGCTGTTCTACCGTTTCTTGATAAACAAGCTCCATCTGTGAAAG  
CTTCCGGATCCGTGAATACGCTAGTCAATTCGCCAAGGAGAAATTGAAGGACATGATACCGATGGCGAAGG  
GTTGTTTCTGTATTGATGCAGCACCAATTCCTTTAAATAACCAACGAGTTGCTATTATAGGAGCAGGT  
GGAGCAGCTCAATCCATAGCA ACTCGATTGAGCAGAGCAAACCTGTGAACCTTCTTATTTTAAACCGCACTA  
AAGCGCATGCTGAGGATCTAGCTTCTCGTTGCCAGGCAAAGCATTC TCGCTGGAGGA ACTCCCTCTACA  
CAGAGTCTCCCTTATCATCAATTGCCCTTCTCCTTCTCCTTCTTGTACCATTCCTAAAGCAGTTGCTCCC  
TGTGTTGTCGATATTAATACAATTCCTAAACATAGTGCCTTCACTCAGTATGCTCGATCTCAGGGAAGCT

CCATTATTTATGGTCATGAGATGTTACGCAGCAAGCTCTCTTACAATTTTCGTTTATGGTTCCCAACGCT  
CTCTTTCAAGCATTGGAACAACTTTATTCGTAGAGCTGCTGTCTTAGCTTCTCTTTTTTCCATCGCA  
CCATAAACATTTTTTTTCTATGCTGCTTCTTCGTCTTTGGAGGCTCTATGCGTCTTTGTTTTATTCTTTT  
TCTATTGCTATCTCCTTAATCTCCGAAGCTTCGCAGCGCATTATTACTGTGAAACTATTCATGAGATT  
GCTTCAAACATCTTGTATGATGATGCAAATTACTGGCTGATCTTTGATATCGATGACGTTTTGTTGAGG  
GAGCTGAAGCTCTCAGCCATTCAGCTTGGTTTGAACGCTCCATACAAGGAATGCGGGCATTAGGAACATC  
CGAGCAAGAAGCTTGGGACACTCTATATCCTGATTGGCTATCTATTC AACGTCAAGGCTCTATTAAACAG  
ATAGAACTGCTATTCCTCTATTAATTACCAAAGTTCA GAATCAAACAAAATCGTCTTTGCCTATTCAG  
AGCGCAAAGTATGCGCGCAAGATGTGACATTAGAACAACCTGCTAAGATTAACCTCTCTTTTGAGAAAGC  
GAATCTTCCCTATAACAGTCTCCCATCAAACATCTGTTTACAAAAGGCGTTCTTTTTGGATCTGAAATT  
CATAAAGGACCTGGATTACAACATTTCCCTAGACGCCCAACCTCTTTACCAGAGAAAGTCATCTACATTG  
ACAATGAGAAATACAATGTCTTACGTATTGGAGAAGTCTGTAAACAAAAAACATCCCTTATCTAGGGAT  
TGTTTATACTGCCTCTAAATATCATCCCCAATTTATCTTCCAGATATTGCCA GAATACAATACCTATAC  
CGCCAAAAGCTCATTAGCAACGAAGCCGCAGCACTCTTATCTCGTCACAGGCTAGATAAGTAATCCCTT  
TTTGAGAAGAAATTAACCTCTGGCAAAAAATCTTTTTTCCACTACACGGGTGGAAAAGCTTTATTAGAG  
GTTGTTGTGTCCTCCGTTCCGTTTACTGACTGCTCTGCTCTCCCTTTCTTTTACGACCACCATGCAGG  
CTGCACACCATCACTATCACCGCTACACAGATAAACTGCACAGACAAAACCATAAAAAAGACCTCATCTC  
TCCCAAACCTACCGAACAAAGAGGCGTGCAATATCTCTTCCCTTAGTAAGGAATTAATCCCTCTATCAGAA  
CAAAGAGGCTTTTTATCCCCCATCTATGACTTTATTTTCGGAACGCCCTTTGCTTACACGGAGTTCTGTTA  
GAAATCTCAAGCAAGCGCTAAAAATTC TGCAGGAACCCAAATTGCACTGGATTGGTCTATTC TCCCTCA  
ATGGTTCAATCC TCGGGTCTCTCATGCCCTAAGCTTTCTATCCGAGACTTTGGGTATAGCGCACACCAA  
ACTGTTACCGAAGCCACTCTCCTTGGTGGCAAACTGCTTTAATCCATCTGCGGCCGTTACTATCTATG  
ATTCCTCATATGGGAAAGGGGTCTTTCAAATATCC TATACCTTGTCCTACTATTGGAGAGAGAATGCTGC  
GACTGCTGGCGATGCTATGATGCTCGCAGGGAGTATCAATGATTATCCCTCTCGTCAGAACATTTTCTCT  
CAGTTTACTTTCTCCAAAACCTCCCAAATGAACGGGTGAGTCTGACAATTGGTCAGTACTCACTCTATG  
CAATAGACCGAACATTATAACAATAACGATCAACAACCTTGGATTCATTAGTTACGCATTATCACAAAATCC  
AACAGCAACTTATTCCTCTGGAAGCTTGGAGCTTACCTACAAGTCGCTCCTACCGCAAGCACAAAGTCTT  
CAAATA GGATTTCAAGACGCTTATAATATCTCCGGATCCCTCTATCAAATGGAGTAACCTTACAAAAATA  
GATACAATTTTACCGTTTTGCTTCCGGGCTCCCGCTGTTGCTTAGGATCTGGCCAGTACTCCGTGCT  
TCTTTATGTGACTAGACAAGTTCCAGAACAGATGGAACAACAATGGGATGGTCAGTCAATGC GAGTCAA  
TACATATCTTCTAAACTGTATGTGTTTGGAAAGATACAGCGGTGTTACAGGACATGTGTTCCCGATTAAAC  
GCACGTATTCATGCGGTATGGTCTCTGCAAAATTTAATTAACCGTAACCCACAAGATTTATTTGGAATGTC  
TTGCGCATTC AATAATGTACACCTCTCTGCTTCTCCAATGCTAAAAGAAAATACGAAACTGTAATCGAA  
GGGT TTGCAACTATCGGTTGCGGCCCTATCTTTCTTTCGCTCCAGACTTCCA ACTCTACCTCTACCCAG  
CTCTTCGTCCAAACAAACAATCTGCCCGTGTATATAGCGTGCGAGCTAATTTAGCTATCTAATCTGTAGA  
TTAGCACAAAACGCTTGCATCC TTGTGGTTAACCATTTACCAACAAAAAGGAGGCCCTATGCCTTACG  
GA ACTCGTTATCC TACATTGGCTTTTACACAGGAGGCGTTGGC GAGTCCGATGATGGCATGCCGCTCA  
ACCTTTCGAAACATTC TGTTATGATTCAGCCTTATTACAAGCAAAAATCGAAAAC TCAATATCGTCCCC  
TACACCTCTGTTTTGCCTAAAGAAT TATTCGGAAATATCC TCTCTGTGGATCAATGTACAAAATTC TTCA  
AACATGGTGTGTATTAGAAGTCATCATGGCAGGAAGAGGTGCTACAGTCACAGATGGCACACAAGCAAT  
AGCTACAGGAGTAGGCATTTGTTGGGGGAAAGATAAAAATGGAGAGCTCATCGGGGGCTGGGCAGCAGAA  
TACGTAGAGT TTTTCCAACTTAAATCGATGATGAAATCGCAGAAT CTCACGCTAAAATGTGGTTAAAAA  
AATCCCTTACAGCATGAAT TAGATCTTCGATCCGTAAGTAAGCATAGT GAGTCCAATATTTCCATAACTA  
CATCAACATCAGAAAGAAATTTGGTTTTGCTTAAACAGCTCTCGTTTTCTTAAATTTTCGAAAATGCAGCG  
CCTGCTGTTATCC AATAAGAAAAGGAGGCTTTTATGTTATTAAGAAAACGGTCTCCTACTAGCATTTTAG  
GAACCTTAGCTCTTACTGGAATCGTGATCAGCTACATGATCGGAGGAGGTATTTT TAGTCTTCCCTAAAA  
TATGGCGGCTCTGCAAGTGCAGGGGGCGGT CATGTTAGCGTGGATGCTTTCCGGAATCGGAATATTTTTT  
ATAGCAAACACCTTTAAAACACTTTC TATTATCCGCCCTGACTTAAAAGCTGGTATCTATACTTACAGTA  
GAGAA GGATTTGGTCTTATGTC GGATTTACAATAGCTTGGGGATATTGGCTTTGCCAAATTTTCGGGAA  
TGTCGGCTATGCCGTAATTACCATGGATGCCCTTAACTATTTCTTCCACCATACTTTGCTGGAGGAAAC  
ACAATTC CGGCCATCTTATTA GGATCACTATTGATTTGGATATTC AATTACATTGTCTTACGAGGTATCC  
GCCAGGCTAGCTTTGTTAACATTATTGGCGTAGTCTGCACGTTAATCCCTTTGCTCCTATTTATTCCTCAT  
CACAGCTCGATTC TTTAAGTTTTTCGATCTTTAAAAC TGACTTTTTGGGGGACTGCTCCGCAACATACACTA

GGATCTATCGGATCTCAACTAAAGAGCACGATGTTAGTCACTCTTTGGGCCTTTATAGGAATCGAAGGAG  
CTGTAGTAATTTCTGGCAGAGCTGCTAATCCCTCCTCTGTTGGGAAAGCCACTATCTTAGGATTTTCAGG  
ATGCCTACTCATATATGTCCTGCTTTCCTGCTTCTTTGGTTCCCTATTTTCAGTATCAACTAGCAAAA  
ATAGCCGATCCTTCTACTGCTGGGTACTGAACATTCGTTGGTAGGGAAATGGGGAGAAGTCCTTATGAATA  
CAGGACTATTAATAGCCGTCTTAACCAGCTGGTTATCCGGACAATCCCTTGCTCTGAAATTCCTTACGC  
TGCAGCTAAGAATGGAACATTCCTAGAATGTTTTGCCATCGAGAATAGCAAACACGCCCTTCTTTTTCC  
CTATTCATGACAAGTGGGTAAATGCAGATTACCATGCTACTAGTATATTTCTCTTCTAATGCATGGAATA  
CAATGTTAGAAATCACTGGCGTTATGGTCTTCTGCTTATCTAACTAGTTCCCTTTTCCTTGTGAAATT  
TAGTCTAAGTAAGAAGTATCCCAAACAGGCCGCTATCAAAGCTCGCATGCGATGATCACCAGGCTATTG  
GGCTCACTGTACTCTCTATGGCTGATCTATGCTGGAGGATGCAACATCTATTTATGGTTCGCTATCCAC  
TTGCTTTAGGGATTCATTTTACGTAGATTCAGGAATCAGACATAAACAAGAAAAACTTTCTTGAATCG  
TAAAGAAATCCTGAAAATGACGATCATGGCTCTTGGCGCTCTACTCGCTATATTTTTATTCCTGCTAAT  
AAAATCCATTTGTAGAGAGAGCTTTAAGTGCCCGTCTTTAATTTTTCTTATCTTTTCAAAGGAACGGT  
TCTTTTTCAAAGAATCAGTTCTTTCTATTCCTTTAAAATCCCTCTTCTTATCCCAATAGTAAAGCCG  
AATCAAACCTTCAAAAAATCTTTTTTTTTCAGCTTTTAAAGGATTTTTATGCACATAGCGGTTTTGGGAGCG  
GGATACGCAGGATATCTGTGACTTGGCATCTTCTCCTTTATACACAAGGACGAATTAGCGTTGATCTCT  
TTGACCAACCCCTATTGGATCTGGAGCCTCAGGCCATCTTCTGGCCTTCTTCATGGCTTTACAGGGAA  
AAAAGCTATCAAGCCTCCGCTAGCAAATCTAGGGATCACCACAACCCATTCCTCATTACCAAAGCGAGC  
CTTTCTATAGGGGAGCCCATCGTGACATCCAATGGGATCCCTCCGTCCTGCAGCCTCTCAGGAACAGGCCA  
CTATTTTCATGCAAAGAGCACAGGAGTTCCTCCGATGAAACGGAGTGGTGGGATAAAGCTCGGTGTGAAAT  
TACAGTTCCCTGGAATGGTCATTGCCGATGGACTCGGAGCCCTTACATTAACATGGGGTAAACCATTGAT  
AATGATAAATATATCAGCGGTTTATGGAATGCCTGTGCTAGCCTTGAACACAATATTACGATGAGCTGA  
TCGATGACATTTACGCAATCGCTGAGTTTTATGATCACATTATTGTAATCTCTGGAGCGAACGCAGATAT  
TCTCCCTGAGCTTAAACACCTTCCCTATCTAAAGTAAAGGTCAGCTCGTAGAAATTGCTTGGCCAGCT  
GAGATCCCTATGCCACCATTCAGCATCAATGGCCCTAAATATATGGTTGCTGATACAACAAGAAATACTT  
GTATATTGGGAGCAACTTTTCGAGCACAACCAACCAGATGCCACTCAGATGCTCAAGTTGCCATACAGGA  
AATCATGCCTCCGATTCCTAGCTCTTTTCCCTGGGCTTAAAGACGCTCAAGTCTTAATTATTACGCTGGT  
ATGCGCTCATCGAGCCCCACCCATTTACCCATGATCAGTCGCGTACAAGAAAAATTTGTGGTATTTAGGAG  
GTTTGGGATCCAAAGGCTTTCTATACCATGGGCTTTTAGGAGATATGCTCGCCAGGCTCTATTACGGGA  
TTCCACGGCATATATAGCTAAGGAGTTTTCTCTACACTCCAGAGGGAGCAGCCTAACTCTCCCTCTCTTC  
TTAAAAAAGAGAGGAGCCTTTTTTCTTACAAAGATACGCTAGCTTTTTTCTGAAATCTCATCAAGAG  
ATATTGCATTTTCCACGGATAAAGGCATCCCAAGGAAGCCCTGGAATCACTTCATATTCCTCCGTTGC  
TAGCATTCGACAAGGGAAACCAAAGATTAATCTTCCGGTAATCCATAGGGATGTGGTCCGAACACACT  
CCGGAAGAAAACCATTCCTTCTTTGGCTGATATATTGATCGAGCAGCCTCTGCTAAAGCTCGTGCTG  
CAGAAGCTGCCGAAGACTTCCCTCGTGTCTCAATTACTGCACTACCACGACTCTGTACAGAAGGCACCAT  
AATATTCCTTAACCAATCACGATCCGCTATCGTCTCTGCGATAGGACGGTCATTAATCAGAGCTTGCCTA  
AAATCAGGCACTTGTGGCGGAGTGATTTCCCAACCAACTTGTGATACAGCCGATAAAGGTACTT  
CTGCTCTATGCGATAACATGCTATGCATACGATTCGGTCCAATCGTAGCATCGCATGAAAGTCTTTCT  
CAATAATCTGGGAGCATGATTCATTGCTATCCAGCAATTGGTATTCACAGGGTTCCCAACAACAAAAATC  
TTTTGCATCCCGCTTGGCTGTTGTGTTCAAAGCTTTTCTTGGCTAGCAACAATCTCCCATTTTTCTTTA  
GAAGATCTTCTCTCCATTCCTGGGCTCTAGGAACGACCCCTATAAGGAATGCCGCATCAATGCCATC  
AAAAGCATCATGCAATGATGTGCTTACCTGCACACGCTGTAATAGAGGGAAAGCACCATCATCTAGCTCC  
ATGCGCACACCAGATAAAGCCCTTCTGTTCCAGGAATATCGTAGATACGCAGATCGATGCCACAATCAA  
GGCAAAAACATCTCCATGAGCCAGAGAAAATAGAAAGCTATAGGCTATTTGCCCTGTTCTCTCTGTTAC  
TGCTACACTACTGTTGAGAAACCATAAGCCACCCCTCTCTTACTTTTACAAAACGCACATACTCTCAA  
CACTACGTTTGAACATAACTAATTTTGGTCCCAACATACGTTTGGATGATAAAAATGAATCAAGTACCTAGA  
TTCTCTTAGTAAAAGCTTTTGGCAAAAAAAGCTCATCTATTTTTCAATAGATGAGCCGACTTTAACTGAT  
AAGAACTTAGAAAACCTTTATAAAAAAATAGGCCGCTGTGATCCATACCATATACTTGTCCCGACCGCATA  
ACTTGTGTGCTCTTTTATGACGCCAAATAACCGTGGACATCTAAAAAACCAATAAACCCTGCGCGAATAA  
AGAACATACAGCCCCATAAAAAACGATTTAAGAGAGAAGTGATAGACAGATTATAACATATTTAAAATA  
AAAATCTTGCAACAAAAAACTTTGCCTGGCCGCTCCGTAAGAAAGCACTTTATGTTAAAACGTTAAAA  
AGTCTTAACACACCTCGAGCTTCGGGAAACTCTACAGGAGCATTCCTCCGACATGATGCCTATAATTTGCG  
TTGCCAATTCCTTTCCCTAATGAAAACCCCTTCTTGGTCAAAAATGATTCCTCCAGCAAACCCCTTGAAA

TGCAAATTTATGCTCATAAAAAGCCAATAAACTACCAGCAATACGAGGAGAAAGCTGTTGCGCTACCAAT  
ATCGAAGAAGGACTGTTCCCTTTAAACCTCTTATTCGGGTTCGCATTATCTCTACCC TGAGCTAAAGCTA  
AAGATTGAGCAACAAGGTTTGC AAAAGAGCTTTTGAGATGATGAGCTTCCTGATAATACACAATCTAGCCC  
TCGTTGGTTATGCAAAAATCCAATGA ACTCTACGGGAACAATATCTGTTCCCTTGATGAAGACTTTGGAAA  
AAA GAATGCTGACAGTTTGTCCCCACATCGCCCCAAATAATGGGTGAAGTCCTAAAATAATCTCCTTCC  
CTTCTCTCGAAATACTTTTTCCATTGGATTCCATTCCACACTGTTGTAATGCGCTGTAAAATATTTCAA  
TCC TGTCGAATAAGGAATCACTGCTGTTGTAGGATACCC TAACAGATTACGATTCCAA ACTCCCAAGCATC  
GCAGATAGAAGAGGAAGATTCTCTCTCATTTTTTGAGT CAGCGCATGAGCATCGATAGCAGCTGCTCCTT  
GCAAAA ACTCTATAAAAAGCTTCGTAACCGAAAGCAAAACCTAATACA ACTCCCTCTACCATTGGATGTAGC  
TGAAAATCTTCCGCCAATACTATCCCAAAGATGGAATACTTCTAGATAACGACTCTTATCATCCATAGGG  
CTGCCTTGAGAAGTTACCGCTACAAAATGCTCTGCAATAGATAAACCTTTATTTTGATAAGCCTGTCTGA  
ACAGTTCTTCATTTGCTGCAGGCTCTAAAGTTGTTCCCTGACTTAGAAACCACAACAACCAGTGTGTGCTC  
CAAATCTATCTCCCGTAATACTTCTGCAGCATTATCCGGATCAATATTGGAGACAAAAAAGATTCTCTTA  
TCAGATGGGCAAGAGCCTTG CATAGCAAATACATAGCTTTAGGGCCCA ACTCCGAGCCCCCAATACCTA  
TCTGTACAAGCGTAGAAAATTTAGCACGAGCTATATACAGAAA ACTCTGCAAGACGAAGAGCTTCTCCTT  
AGAGTGTCTTGCTATCGCAGCAGCTTCTTCATGAAGATCTTGATCTCGA ACCCAAGCGCTGTTGCCGTA  
TGCAATACAGGGCGAGATTCCGCTCTGAAAACCTTCTATACGATTCCATGATGGCGCCTTGTTGCATACACT  
CCATCTGTTTGATCAATTCCCTCTCTTCAGTAAGTCCCTTG TAAAAGCCTCTAAGCAGCGATCATCTACAG  
TTCCGTAGCATAACTATAGGTAAAATCC TTCTACAGATAAAGAGT TTTTCTGAATACGCTCTTCAGATAAG  
CATCC TGATGCAGTCAAATCAATCGGATGCAAAGCCATCTCTTGCAAAGCAACTAATGACTCACAATCTA  
AAAAACCTTTACCCATCATGATTCTCCTTTTGAGGAAATGTGATACGAGAGACCTTCTTTCTTTTACTT  
GTACTATCTTTTCGTGATCTTTTCGCGATTCCATTTTTGTAGAACAATCGATCTTTTCATCTATTACTCTAC  
AATGTACTCCGAATATCTTTTCTGTA AATTGTTTCGGTAGAAAGCCCTTA ACTATTAGTAAATCGTTTTCA  
TAATAATGTGAGATGACTAAGCCGGCATCACACAATTCTGTAAACAATCCGTATTCCCTTGTAAGGAAGAT  
GTAAAGTCGCTTGAGGATACTCTCTTG TACCATGTCTCCATGGAGCGTAATAACTCTCGAATACCTTC  
TCCTGTTTTTAGCAGAGACACATACGGGTTAGGTGACATCAGCCGCAATCGAGAAGCAGTTACTCCATCA  
GCAACCTTATCCATTTTTATCCAATACTGTAATTACTTGAGGCTGAGTGATTCTA ACTCTCTGCAAAATAG  
CCTTTGTAGTCTCAACATGTTCCAATGCAAGTGGATGAGAAGCATCTACTACATGTAATAAAAATATCCCTC  
TTGTAATGCAGCTTCTAGAGTACTTTTAAATGCCGCAACC AAAGTATGCGGAAGTTTGC GAATAAAGCCT  
ACTGTGTCCGTCAATAACACTCGCTGACCACAAGGCAAAACACAGCGTCGAGT TTTAGGATCTAATGTCTG  
CAAACAGCTTATTC TCTGCATAGGTATCTGCTGATGTCAGTAAGTTTAAACAGAGTACTTTTTCTCTGAATT  
TGTATAACCAATCAATGCAAAGGTAGGAATCTGATTACGTTTTTTTCGCTTTACGACGCTCTTCCCGTTGA  
CGTTCTACATTTTTTAGATCTCTAGATAGTTATGTATCCGCTCCCGAACAATTCTTTCGTTCTAATTCAA  
TCTGCTTCTCTCCCTCTCCCTTGACAAAACCTCCACC ACTACCTCTGATTTCTGTCTAGAAAAGATGCC  
CCACATACGTTT GAGTCGTGGTAATAAATAACGCGCTTGCGCGAGCTCTACCTGTAATCCAGCTTCAGCA  
GTGAGAGCTCGACTCGCAAAAATTTCTAAAATTAATTC TGTACGATCTAATAACAACAACACGTAATCGTT  
TTTTCTAAGTTCTTTGCTGGGAGGGAGATATCTCTTCATCAATTAGCAAAGTCCCAATAGTAGGAAATTC  
TTCTAAAATTC TTTTCGATTTCTCTAATTTCCCTTCATTTAAATAAAATGAAGAAGAAGGAGCTCTTAAA  
AGCCATGTACAAGTCTCAAGCACACTAAGATCACAGGAATTCGCAAGAGAAATGAGCTCCTCAACATACT  
CAGAAACACGATCC TGCTCTGCACGATTTGTATAACAACAACAGCTAAAGCTTGCGCAGGATCTTGTTCT  
CTCTCTAGGAAGCAAAAACCTCCAACCTATTGCAC TTTGCCGCTCTTTCTTCCCATCTCGATTATCTTTC  
TTCATTTCTTTTCTTCCTTATGTCCATAAAAAGCTCCATGCCATCGTATGCACACTCTCGTGTAACATCCCT  
TTTCCAAAAC TTTGTGAAGATAGTACTCACATGTGTAATCACTAGACGAGAAGCTCCACCTTTTCCAT  
TAGAAGATCCGCTTGTCTAAGGTAAATGCGAAGGCGTCCGTGATCCAAAAGCTTTAGGCAAAA ACTCCCT  
AGGGAAGCTGACACAATGATCGTGTTCACTCTTG TAGATAATCTACAATCTGCTCATCGTAATGAGACA  
TATCCGTTAAATAAGCTAAATCC CCAAACGATAGCCGTTACCTGACAATTC TTTTGAAAATAGGAAAC  
GTATGTAAACGGAATACCTAAGAACTCTTGTTCTCCGCATTTCTCATTTAAAATAGTATAGCGCAAAGAA  
GCCGCTAAACTGTTATTAGGAGTCTTTTCTGAACAAGATGCTCCTTAGTTTTACATAGATAGTCATATG  
TAAATGATGAAA GAATAATCGGAACTGATTCTAGATGCGTGATATACCAAGAACGGAGATCATCGATCCC  
TCCAATATGATCATAATGAGGATGAGT AAGAAATACACCATCCAAACGAGGAACACGGTATCGCAATAGC  
TGTGTTCTAAGATCTGGACCTGTATCAATGATAAAGTTTTTTCCCTGACTCTGA ACCCACACGGAGGAAC  
GCAGACGACATATTC TGCCTTGCGAACATACCTCACAGAACAGAAGGGCACAGGATTCTTCCGGATC  
TCCTGTGCCTAAAAAACAATCTTCCCCGAACAAGATGTTTCTTCATAATAAGGCCCTTAAATCGTTTT

CTAAAATTAGTTGTTCAAACCCCACTTCTGTTCCAACTCTGCTAGCACTCCTTCTTTTCGGATCTCTTGC  
ACAGCTGCCTCGATTTCCAAGGCTAAAGCTGGTCGATCTGAAGCAACGCCAATCCCGTATCCATAAAACCC  
ACTGATCTTCAGGAAGATCTATGGTTGCTGTAGAAAGAGCCGGGGAATCTTTCAAGACAACCTTGAGCGAT  
AGATGGCTCTAAAACAGCGACGGGAGATTTACCATGCATGACTTCCATGAGTACTTCTAGAGTGCTATCA  
AAAGAGCGAATATGAACCTCAGAAAAGAGACTGTAAATAGGCCTCTTGATAGGTTCCGTGTTTGAACAGCTA  
CAGAACGATATTGAGTGAGTGGCAATGGATGCTTATTCCTCCTTTAAACACTAAAACCAAGTGTTTTAT  
TTCTCCCATAGTAGGGAATCATAAGAATTTCTTCAATCTAGAAGGAGTAATGGACATCCCTGTTATG  
ACCGCATCAATCCGATGCTGTTTTAGGTTTGAATGAGTGCATCAAAGGAAAACCTCCGAACGTCAAGCG  
TTTTCCCCAGCTTGTTACTAATCTCTCTAGCCAAGTCTATATCGAAGCCTACAACCTCTCCTCGCTTATC  
AACAAACTCAAAGGAGGGTAGGTTGCATTAGTCCCTACAATAAAATTTTTCACTATTGGAGTCTCCCCCT  
TCTTTTAAACAACCCGTCAAACAAAACACTACAGACAACCTGCTAAAAAAGCTATCCATGTTTTTTTTCTTT  
TTATGCACATACTCACTCCGACTCAATGGTCTAACGACAGGGACTATACCCAGCATGATTCATAAAAAA  
ATAAGAATCTATACAAAAACTGCTCCTGTTTTCTAAGGAGCCAATCTCTTGAACCCAAAGCCCTAACTCTT  
CGAGTTCACAAGGAAGAATATGTTGTGATCCATCACATAAAGCTAGTTCAGGATGCTCATGGACTTCAAT  
CATCAGTCCATCTGCTCCTAAAGCTATTGCAGCACGAGCTAATGGTAACACTAAAATCTCGTCTTCCTGAT  
GCGTGAGAAAGGATCCACGATCACAGGTAAGAAGTTTCCTTCTTAATCCATGCGACAGTATTCAGATCCA  
ATGTATATCGAGTAGTTGTTTTCAAAAGTACGAATCCCTCTCTCACAAAGAATAACTCCAGGACAAC TAGC  
ATGCTGTAACAAATATTCGAGCAGACAACATTCGAAATTGTAGCTGAAAGGATTTCTTTTTTAAATA  
ACCGGACGATGACTTTGTCTACTTTCATCTAGCAAGACAAAATTTTGCATATTGCGAGCCCTACTCGTA  
AAAGATCTACATGCTCTGCTGTAATTTCCACATCACGAACATCTAAAACCTCTGTCTCCGTCAATAATCC  
ATGAACAGCTTTTGTCTCGCTATGCCACACTACGTGATCGGGAGGCCAACCTTGAAAAGAATGCGGGTTC  
GTTCTTGCTTACGAATAGACCCTCGAAAAATATGCGCTCCAGCACTTTTAACCTGTAGCCCTAAAGTAA  
TTGCATGTTCTTGGCTTTCCAAGGTACATGGACCAGCAATAATGATAGGAGTCCCTCCACCTATAGACAC  
GGTTTCGGATAAACGAATAACGGGACTCCTATTGGAATTAATACATGAGGTAGCGGGACCCGTTTTTTTT  
CCCATTAGATTTGTTTTCTTGTCTTCTCTTAATCTCATGAACAGCAAATCATAACACAGGGAAGAGA  
AAAGAAATAGAAAGATTTTTCAATGAAAAAACGCCCTCTCTCTTGAAGAGAAGAGAACGTTTAAATGAT  
GCTATTCGATCCGTTAGACAACCTGTTAATATCAGAAATTACATCTATCAGCGTCGTAAGAAAAGCTTG  
AAATAGCGCCTCATCAGCATATTCATCTCTTCTTTGAGTAGTTTCTACAATAACAAGCAAACACTACAA  
GTTAAACACATAACGCCTTGTATAAAGAATAATCTACATTTTTGTTTTAGCATATTTTTCTCACAAAACAC  
AATAGTTTCTATTATAAAACTAAAACAAATAGATCTTAAAAAATAAAATTAATTCAAATGAAAACAATT  
TAATTTAAAACCATTAATTCATTGAAGACAAAGAAAACCTTTGTTAAAATTTTTTCGTATACCGCAA  
AATGATTGCGAGGCTCTTAAAAGCAATGTTCCGGATCTATCCCTTGTATCCCGGATACAACAATATTC  
GCATACAGTAACAGTTACTTCTACTGTACACTGTGTGATGGCGTTGTATCACCTACCAACGTGGATATTG  
CTATTGTTGTACCTAACAAACCCACAGCTCACTAGAATCCAAACTGTCTGTTTTACGCTGTAAAACCA  
TCCGTTAAAGGTCTGCCTCTGGTGGTCCAATTACTTCTTTAAGAGGTCTGATCCCTTTTTATCCCT  
CTGTTAGAAGAAACTACCAGAAAATGCTGAACCTCTGCGCTCGTGTTCATTGCC TAGACGTACTGACTG  
TATGCAGCACTTTGATAGCATCTCTCCTTGCTATTACTGGAGCTATCC TACAGTTCATAGTCGCAGCGCC  
AATCCACACCTTTATCCCTTGATCC TATTTGGCGTGGCAATAGCCTTCTATTTAGGAGCTTTCTTGTGC  
ACTCGGATCTCTCAAAAAGATACTCTGCGCTGGCAAGCTCTTTCTAAAACATCATCCGTTCTTCCACA  
ACGTCCCTGTTTCAGGCTGGGACGGAACGTTACACGCTACTTACGGAATTCCTCCAACCTGTTATGAAAA  
CCATTCATTGATCTGTATTCATACGCCCAAGTTCATGGTGTGCTCCAAGGGTAGTTGTGAAAAAAACT  
GCGTGTAACCTTTCTGCGGCATACAAAAAATCTTGAAAAACCAGCGCGGCCACTAGCTATTGATCCCTA  
TTTGAATAAGGC GAATACAGCTCCTGCAGCTGCCGATTGTAAAGAGGCCGCTTCC TG CAGACAACGCTCT  
CTTAAAAACATGTAGCGATTC TATTTTCTGAATAAGCAATTGCTTCCAAGATAGTCAACTTGTCTTGCC  
AGCGACTATGTGGATATAAACTGATCACTGCATGCAACCCAGCTTCTCCTCCTTCGCGTTGCAAAAAAGA  
AAGAGCTTTCTCTAAGGCAAACGCAAAACTCTCTTCTTGTAAATGGTTCAACAAAATCCTCGCTATCCCT  
TCTTCCAAAAGACTTCAGAACAGAACTCCATCC CACCTGCTGCCCTGCTAAATACTGAGCGACAACCA  
TTTTTGCTTTGCTGTACTGAGCTGCAACTAATAAAACGAATGATCTTCTTCGCCAAATCCCTTTTCATGAT  
TTCTACCTGCAGAGGAGATGAAGCTACAAAAATCTTCTGATCTTCACATAAAAACTGTTCAATAGCTCGA  
CAGGGCTCTATTC TATGCATAAAAAGAAGCAACAACATCTCCAGCTTCTTCTACCTTCTCTCGACTTACCA  
AAAGCGCAAAGCAAGATTCCTC GAGAACGCATTCCTTGTACTTTTGATAAAAAACGTCCAGCTAAATG  
AACTCATGAATCCCTAATGAGCAGACCGTTCTGAGGCAGCTTCACAAAGGATGCTGGAAGTAGCTGAT  
AAACCTTCTGTAAGCTTATCTTCTCCGAAAGGATCTCCCTCTAAATAGA GAATGGCTGCAGCTTGCATCT



GAACACGAGCAGAAAAGTGAATTACAAGCTAACTTTTGAACCGATTCATTATAGAAGATGACCGGAATAC  
TCTACCTCCTCTCAGAATGATCTGTAAAGTAGCTACCTGCACTTCTGGATGATCTGCAGCCAATAATGTA  
CGAATCTGTTCTTCCGTACACTTTTCAAGGATATTCCTTTAACATCTCACAGGTCATTAAAGCTTGATCTA  
TGCCAGTTAATACACCCTATGAGGCCGAGTAAGAACACATAAAGATCTCCAAGCTTCTCTTCTTCCGT  
TCCATCTAATTGTGTATTTTGGACTACAACTCGTAAATGAGGCACAAGATCTTGTATCTCCAACACGGCT  
GCAGCACGATAAGCAGTGATGCGTACTTGAATAGAAAGAAATCATTTTTCGCTAAATCGCCCACGGCGCGCA  
GTAAGCAACTAGAACCATAACAGCTACTTGTACAGCAATCTCACGTACGGTATCGCTATCATCAGA  
CAAAGCCTGCAAAAACATAGGCACTAACCGATAGTCTCTCGCCATCCCTACAGCTAAAATAGTAATTA  
CTCGAACGGTAAGTGAAAGAAATGTCTAATATTTTTTTGTAGAAGAGAAGCTGCAAGATCCTCATGAATATCAC  
GATCTGCTTCCAATGAAGGAAAGCGTTCCTTGAGAACGGAGGAAGGCCTCTCTCCAAGCAGAATATTCATG  
ATGTTTGGCTAAGGCTCGTAAAGCCAAGCGAGCTTCTAGTAAGGAACAATCGGAAGATAATGAGGTCTTA  
GCCTCTTGCCTGCGGTACGATACTCACAAAAACGCATTCGTTGTTGGATGGAATAGATCCATCCACAC  
AACACATAACGAGCAGATATACTATGCTATGGAGCCTAATAAGCCTCCACCAAGAAGATGAATGTGTAGG  
TGGAAATACGCTCTGCCCCCTTCTAAGCCATTGTTGACAACAACCGGATACCCATTTTCTATCCCGAAAT  
TTCGAGCCATCAACTGAATAATCTTCCAGCTTCTGCAAGCAAGAGAAAATCGTCGCCTTGTATATCCGTG  
TAACTTCTCAATATGCTTCTTGGGAATAAATGAGCAAATGTACTGGAGCTTGAGGGAACCTATCTTTAATC  
ACGATAAAGTTTTTATCCTCAAAAACCTTATCGCATTCACAGCTCCTTCTATAATGCGTTCAAAAATGG  
TAGTCATACTAATCTCTGCTGTTTTAACACTAAATTCAGTGCTTCTTCACAACTCTCTTGACTATCCCAT  
ACAGAAAGAAATAGTCTTTTGTGACAAAAATAGCACCAGGAATTCCTCGTAGCTTGAACCAACTGATCTC  
CAAGCAATCCCTGCCCCTCCTCAGGGAAAGGAATCCGGACTTCCATCCGGCGATCCAAAGTAGGTGGAAT  
GCCTCGCAAAATCCATTGATCCGAGCAAGGGAAACTGACAAAAGCTGCCGGATGACTTTTCTCTCCCAA  
GAGAAAAAATTCCTGTCATGCTAACGGACGATCAATCGCAAACAAACACTTTCTTTTCCATGACTT  
GTTTCACAATATCACGACACACACGATCATAACAGAATCTCTCTCGCAAACGAGTTAGTAAATCGATTGC  
AAACCGTAAAGCAAAGAAAAATTCCTTGTCTGTATTTCTCTCTTCCAAAGGATGTAGATTTTGATA  
ATATCAGAGAAAGAACAAGCCTTCTTTAGAAAAGAAACGTCCGTTATCTTGCTCATCTACACCATGTA  
CTAACGTGTTATTCAGATACTCGTACTCATCGTGAGAAAGAAATCCAGACCATGCAATAATCCAGAAC  
CATCCCTGCGCTACTCAAGATCCGTGTGAAGAACTTGGTGGTGATCGAAACGCTTATGCTCTGTAGAG  
TAGCGCCTCCTACATCACAGACGTACTCACATTGCGCCAACCTTTGGGGATCTCTGGTACGAACGATTT  
TGTTCTCATCAACAAGATCAACATGATCAATAAAGCGCAAGCCGTCCTTCTATCTGCGTGAAAAGAACC  
ATCATGTGTGCCAACACTTCTTGGAAATTTGCATTCATTATCCCTCCGTGATCCCTCGACAATAGAACA  
ACAAACAACCTCGGCCGGTAGTACCATATCCAAAAGCTGAAAATCCCTCATCTACTTGCAGTTTAGGA  
TTAATATCAAGCGTCCGCTGAAGGTATTTTCTCTGTTTGAAGCCCTAGATCTTTTACCTACATCAT  
TTAAAAATAAATCCCTTACAAAGCTCGCATTAAAGCAGCATATAGCGTTCTTTAACTCTCTTTTAAAAA  
TTTTTCTTATAAGCTGGTTCTTACACACAGAAGATTCCTCAATGACGCTCTTTCATTCATCATGATGCCG  
TCTCTCCAGACGGCTACCTATGTTCTTCCCTCAGTTAGTTGGTACTGGCGTATACGAAGGAGAAATCGA  
GATTCAAAATATCCCTCTTATTTCTTGGATTCCAATTACCCCTCTATTGCATACACCTTAATTTAAAG  
AGCTCTCTAGCTCAATTAGGAATAGATGCCCTCCCTTCTTACTGCGAATTGAGCAAAAATCAACATCGAG  
CACATATACATGCTCAATTTACCGGTATGGCCCCATTGCTGAATCTATGCTAGCCCTTCTCCAACCAGG  
AGATCGTGTAGCAAAACTATTTGCTGCAGACGATCGCAGACTGGTCCGATCTCCAGATTACCTCGAAAGC  
ATGCTGAAAAATACAGATAAAGCTGGCCATCCCTTGTCTGTGTTTGGGAAAAAATAGAACACTTGATTT  
CTTTTGATGTGGTAGATGATCGCTTGTGCTCTCCCTTCCCTACCCCTGCGGGGAGTTGTTCTGTTATGATTC  
GGATATTTATGGACTCTTCTCTTATTCAAAAATCACTTAGTAATCCCAAACCTCAGCATTCGTACTTT  
TTAGCTCTGTACCAACAGATTGTGGAAGGGCAACATGTCCCTTGGGAAACCATATTCCTTCTGATCAAAA  
CAGAACCGCTGCACATCCGCACTGTATTTGCTCGCGTGGTAAATCAACTCTCCCTCAAGGTCTCTCCCA  
CACTCTGCCAATATTTTGAACCAACCCTCGAGAATCCGGGATATCTTTGAATTTTTTGGGAACCCCT  
TCTGCACAGATAGAAAAGATTCCTTTAGAAATTTTCACTATCGAACCCTATAAAGAACATTCCTTACTTCT  
GTAATCGGATTTATTACAAACCCTTACAATCAGAAAGCGAAATCAAAAAAATATTCGAAACAGCGCC  
CAAAGAACCTGTCAAAGCTGCCACCTATTTATCAAAGGCAGTGAAATCTTCTTCCCTGCACACAGACTCT  
TGGCTCACAGGATCCGCGACTGCCATCAATATAGTGAGCAAGCAGATAAAAACGAGTACACTCATGCTC  
AACCTTGCTATCCCTTCTTAGAAGCAATGGAAATGGGCCTGATCAATAGCGAAGGAGCCTTACTCACTCG  
TTATTTCCCTTACAGTACTTAAAAGGAATGTTGATTTCTTACCATGTGCGCCACTATCTCAAACAATC  
TACTTTCAAGTTCCCTCTTATACACATGGAAACTATTTCTCTCATAATGACAGAGGTTTGCTATTAGATC  
TGCAGCAAGCAGATATGATGTTTTCTGGGCAGATGAAGAAAGCGGCCGCTGTTGCAATATACAAAACG

ACGCGATAAGAATAGCGGTATGTTCTGATCAAAAATCGTGTTGAAAGAGTTTCGATCAGCTTATTTTATT  
GCTATTTATGGCTCTCGTCTCCTTGAATAAATTTCTCTGCTCAGCTCCATACCCTCCTAGCGGGCTTAC  
AGCAAGCAGCACATACTCTTGGCATTCTGGATTCTCAAAGCCTACCCCACTTGCAGTCATCACGGAGG  
CGGCACGTGAGTTATGGCCACAGGAAATCGTGTAGCTAAAGAACTAGGAATCCATCTTGTGGAACCGTT  
CTTGATTTAGAAGCTTCTCCAGCACAAATTGACCAACCTACCAATGAATTCCTAGATGCTAAAATGACAT  
ACCGCTACCTCAACTTATAGAAAAGCAAGAACACTTTTATGCAGACCTTCCTATCCCTTGTAGTTGGCGG  
TGTAGGAACCGATTTTCGAATCTTACCTAGAACTTGTCTATCTCAAACAGGAGCTAAACCACCGACTCC  
ATTTTCTAATTGGACCTATTGAATACTGGAAAGAAAAGTGGCCACGCCTACGAGATCAACCTCAAAG  
CAGGAACCATCCGTGGATCCGAATGGATCAGCAACTGCCTATATTGTATCACTTCTCCGGAAGCTGGAAT  
TGCCGTATTCGAACAATTCCTAGCTGGAGAATCCCTATAGGATACGACTATCCCTCCAGCTCCAGATGGA  
TTAGTGATCGTCTAAAACAACAATTCCTTAGGATTTTTTTTCTGTAGTGGAGGAAGATTCCTGAGGGAAA  
TTGCTCAAGTAAGAAGGCCTTTATAGATCTAGGCAATAAAACCTTTTTCTACGAGAGGCCTCTCCCGCT  
ATTAAGTAAACATCGCTTTTAGGAATAGATAAAAAATTTGCAAGTAATGCCACAACAGCATCATTGGCTT  
TACCTTTTTCTGGAACCTCAGTTACCCGAATCTTAATATACCATCTTCCAAACATACGACTCTATTCCTC  
TCGCGCCTTTGTAGTGACCTAACCTTAAAACCCAAAAGCCTTCTAACAAAATATTCCTCTCTCTTA  
CTCAGGAGTTTTAAAAGAAAACGCACCGTTTTTACGTTTCTCACACAATTAACCTAACCAACAAGCATAC  
TCATTCGGATTCATTGCCTCCTAAAATTCCTAGTCAAATCCGAAAGAAGCCGACACTCGAGCGCTCTT  
CTCCTAAAATCTTGTTTTTTCTCTGCTTCCGAGTTATAACGCGGCTGTCTCATAACCCACACTAACATG  
ATGAAACCTCTACGTTTCGGTTATTTCTTTTTGCGCAATCTATTTTACTTTGTTACAGGCAGCGTTTGCTA  
AAGAACC GAATTC TTGTCCC GACTGCCA GAAT AATTGGAAAGAAGTACCTACAC GGATCAACTC CTTGA  
AAACATC ATTC ATGCTGATGATGCTTGTATC ACTC TGTTATGTACAGGCTCTCATTGATATGCATTTT  
TTAGATAGCTGCTGCCAGGT CATCGTTGAAAACCAAAC TGCTTACTTATTTTTCTCTTCTACAGATGATG  
TTACGCGCAACGCCATTATCAACCTAATTAAGACCTTCC ATTCATTCACTC CGTAGAAATCTGCCAAGC  
ATCC TATCAAACCTGTCATCATCAAGGCCCTCATGGAAAGACTTCTCTTCCAGAACAACGTTCTTTCTGT  
ACAAAGGTCTGTGAAAAGAAGCTATTTGGTTACCACAGAATACC ATCCATTC TCGCCTCTTGTAGCAG  
ATCC TAGACAAGCAACTAATAGTGCAGGT ATCC GTTTTAACGACGAAGTCGTAGGAAAACGTGTTGGCTC  
TGCTACCTTCGGTGGAGATTTTATCTTCTTACGATTATTTGATGTCTCCCG ATTC CATGGAGACAT GGAT  
ATTGGTCTCCAAGGAGCTGTATTC TCTGTTTTCGACCT GGATCATCC AGAAGCTTGCATGGTCAACTCTG  
ACTTTTTTGTGCGCGCTTTGTGCAACTTTGCAGTGAACAAATGGAGCTACCCTCAGACTATGGCATCT  
TTCTTCTCATCTTGGCGAC GAAT TTATTC TTGCCAACCAAGTTACCTCCTAAAAACGTTATAATCGAAGC  
GATGAAGCCGTCGATTTCTTTGCTTCTTTTCGTTAC ACTCCACAGATCCGTGTTTATGGAGGTATT GGGT  
ATATCATTAGTCGAG ATTC AAC ATTC CCTGAAG ATCC TCTTTACTTTGAAGGAGGTATCGAACTACGTCC  
TTTC GGAT TACGGGAAGACAACCTTCATGCCAACCCGTCTTTGCTATGCATTTTCGCTTTTGGGAAGAG  
CATGACTTCTCTATAGACCAAACCTTATATAGTAGGCATG GAGT GGTCCAAATTC CAGGATGTAGGGAGAA  
AAGTGCGCGCTGTATTG GAAT ACCACCAAGGTTTCTCCACGAAGGACAATTTGTCCGAGAA GAAT CGGA  
TTATATGGCTTTGATTAAAGTTATGGCTTCTAGCTTTTCTCAGTGCTCTCTAAAAATTACGCTGGACAG  
ATGA GAGT CTCATCTTATATTACCGTCCACCATTTTG ACTC TCCCGTGTTCATGGACTTTAGGTGGTT  
TATGAAAAGAA ACCC TCACCTCGTATCATTAAACAAAAAATTATTT ATTC GCAGATTTACAGAAGA GAGTC  
GCCCAATTTCTGTTAGAAA ATCC CCAACATACAGTTATTAATTTATCTATTGGAGATACC ACCC AACAC  
TAAATGCTAGTGTGCTGAGGCTTTTGCCAGCTCTATTGCCCGTTTGAGCTCTCTACAACCTGTGCGG  
AT ATGACCAGACTTTGGACTACCTGCATTAAGACAAAATTTATCGGAAGATTTCTATCGCGGCTGTGTT  
GATGCAAAGAAATTTTCATTTG GGAT GGAGCAAAGCAGATCTCTTCCGTTTACT ATCC TTTTTGGTC  
CCAATCAAACAGTGGCT ATTCAGGATCC TTCTT ATCC TGCATATCTCGATATCGCTCGCTAACAGGGGC  
AAAGGAAATTTATCGTCTCCCTTGCTTGCAAGAAAATGC ATTC TTCCAGAAT TTCCAGAGGAC ACTCAC  
ATCGATATTTTATGTCTATGTTCTCCTAATAACCC AACAGGGACTGTTTTAAATAAAGACCAACTACGTG  
CGATCGTTCATTATGCAATAGAACACGAG ATTC TCATTTTATTTGATGCAGCTTATAGCACCTTCATTT  
CG ATCC TTCTCTCCCTAAAAGTATATTTGAAATTC CTGATGCACGGTTTTGTGCAATAGAAATCA ATTCG  
TTCTCCAAACCTCTA GGAT TTGCAGGC ATTC GTTTAGGTTGGACCGTC ATCC CTCAA GAAT TGACTTATG  
CAGACGGCCATTTTGTG ATTC AAGACTGGGAACGCTTCTTTCAACCACTTTTAATGGGGCTTCT ATCC  
CGCTCAAGAAGCTGGCGTTGCAGGAT TGTC ATTC TCCCTCAACTTGAAGCG ATCC ACTATTATCGAGAA  
AATAGCGACCT ACTC AGAAAAGCGCTATTGGCAACT GGAT TTGAAGT ATTC GGTGGGGAACACGCCCTT  
ATCTAT GGGT CAAACCCACTC AAGCGAACATCTCTGATAGAGATCTTTTTGACTTTTTCTTACGAGAGTA  
CCATATCGCAATTACGCCAGGAAT TGGAT TTGGCCGTAGTGGTTCG GGAT TTGTACGCTTCTCTCTTA

GGGAAACGTGAAGACATATTAGCAGCCTGCGAACGTTTACAAATGGCTCCTGCTCTGCAATCATAAGGTT  
TGTATGCTTTTTGCGAAAATTTTGTGGCTATCTTTTTGTAGTTCCCTAGTTTGTCTTTTTATTTCCGTCA  
TTGTTGTTTCCCTTTCGTTCCAGAACCAATAACGCCTAGCATTGCTATCTTCTCTCCTTTTTCCATAATTC  
TCTTAGTGAATGCATAGAAGTGTCAAAAAGAACTGACCAGCTTGGGAACATGCCACTATCTCTCTA  
TTAATGCTGAGGAT AATGTAGTCAAAGCAAGAAAAATCGCTCGCACCCCTTCATAAAGACCC TAATGTTG  
TCATGATCATTACTTTAGGCCCATTGCAACTAAAGTAATGAGTCAAATCGAAACACAAAAACCGATCAT  
TTATGCTGTTGTCCCTGCAGGAGAAGCTCTCCGATTC CAAAAGAGCAGGTTAATATATACGGGGT TAAT  
GATAGCGTAGACACAAACCAATGTTGTTTCGCGATTCATGCGGTAACCAACAACGC GAATTCGTTGGTTT  
ATCTACAACCC CACGAACCTTTCCCTTCTTCCCTTACAGGAAGAAATACAAATAAACTCCGCGCGTCAGG  
CATTAAAGTGACAGAAC TTCTATTTCTGCAGCCAACATGTGCTCTCGCATTCAGTTTATTGCAGAAAAT  
CGTCTTCCGCAGTCTTTTTCCCTCTTTCTTCCCTTATCAGAAAAAATGGGAACGACGCTCATTAAAAGCA  
TCTTAAAAGAAAATATTCCTCTGATCACAGATGACTCTTCCCTTGTTATGGAAGGTGCTTGTGCAGCATG  
TAGCGTTGATTATAAACTATCAGGCAAACAAATAGCCTGTATCGTTGTTATTGCTCAGCAAGAAAAAC  
AATGAAGAGCATTGAACCAGATTAGCGCAGAGCCGATCC TTTCCAAAATTACTTTCAATGAGGAAATTA  
TCCGGTTCCTTAGGACTTCCATTTAATATGGCTCCGGCTCACCAATTTATCTCTTTCCACTC TGCAGATAA  
TACTGGAT TAGTGACTTTACAAATCCCTTAATCC TACTATTAATAATCC TCTATCATCATCGGAAACAGAT  
TCCGAATCTAAACTCTCATCTTGAGGCATAGAGAATAGAGTATCC TCTCCGGACAGAGCTCCCCATCCC  
GCAAGCGTCCCGTAGAGAACGAGGGTCTTCCACAGAAGGACTAGAACTTAAATACGACGCGTAAAGGGT  
AATGAATGTGCCTGGACGCATGTAATAGTCTGTGTCCTCAGACTCAACCTCTACCCCTCTCGATATCCAA  
TGAAAGAAACGCAAGATCTGGTAGTAAATGGCTCGCAAAGCACCCATTAATGCTCTTGCAAAAACTGAC  
AGGCTCTTCTTCTACAGAACAGCATGCCGTTACCTCTTTCAGAAGCTTGGTCATTAATGCTCAAAGG  
TCCGTCATCATGTAAACGTTCCGCAGAACGAGCTAAGTTGGAGATAGATTGATTAATAGAGCCGACCTCT  
CCGTTGGCTCGAAGTCTCCACTCCTTTCTCATTGACCTCTAATCC TAACTTATGTAAGCGAGCTAGAA  
CCGTATCGCTATCC TTACCTAAAATGGACTTGAGATCTTCTTGAGGAACTGCACGAAGCGTTTTATGTAG  
TGTTGCAAAAGACGCGTTACTAGTCTGCGTGATGACGTATTCCTCTAGCTAATCTTCTTAATGAATGT  
CGGTTATGCGCAAGCCCATGACGAACAGAAAGGGAGCGGAGTCTCTGGTTTCTAGCTATCTCTTCTCGAT  
GAGAAT TAGAACGATTCGTTCTTTCAGAGCGCTCTTATTTCTTACCC CAGGAGACTCTAGCTGCTCTTC  
ACTAGAAGAAATCGCTTGCAAGTAGAGCTTCCATGTCTTCATCCAGTTTCTGCACGTTTCGCGTCTCTTC  
TCCATTACATCCGCGATGATCTCAGCGACTTCAACCTCGCCAACCTGCTCCTCCACACTTGGAGAAGATG  
CCATTGCATCCGACTGAATAATCGGAAGTGAAGCTGCTGAATATCTTCTGCAGAGGTACTCTTCCCTAC  
AGCAGGAAAGAAATAGTCTGACCAGAGGGTGTGACCCCTTCGGGATTCATCCCTCGTCTTCCCTAGAA  
TTGGGAAGCCTCTCAGGAGAAGAACCCGATGTTCTTGTATAGAAGACATAGAGATTTAAAACAAAAT  
TGCAAAAACGCTTAAATTAATTTAAGAAACAAACAAAAGAAACATCAAGTTATTAAGAAACAAAGAAAT  
TGAAGTAAATTAATCC AATAAGAACAAAAAATCACAGAGATTGATCTAGAAACACTCCTATGCTAAGA  
TGCTCTTCCACACGAAACAATATAAAGCACTTCCCTCCCTATGAGAACGTCCTTCTGTTTTACAGAAT  
TCCAAAAATGCAATAAAGAAGCCTCCGTTCTTCCCTACGAGCTTCTTCAGAAAGCAAGGATATCTTTCA  
AAACATCTAAAGGGATTTACTCATAACACCTCTCTTCCAACGAGTATCC TAAAAATGACCGAAATCAT  
TCGTGAAGAACTCAATGCTATTGGAGGACAAGAGGTCTGTCTCCCTCTCCTGCAACCAGCAGAACTATGG  
GAAAAACCGGTGCTTGGAAAGCCTTCTTATCGGAAAAATTACTCTATGTGCTTAAAGGATAGAGAAAATA  
AGGCAATGTGTTTAGCCCTACCCACGAAGAGGTGTCTCTGAATTCGTGGCTCAGTGGCTAACAGGACG  
AGAACAGCTCCCTATCCACCTATACCAATCGGAACCAATTC CGAGATGAAATCCGACCTCGCTTTGGG  
CTTATGCGTGCCAAAAGTTCTTAATGGAAGATAGCTATACTTTTTCTGACTCTCCAGAACAAATGGAAG  
AACAGTATGCAAGCTACGTCTAGCTTACCAGCGCATCTTTGATCGATTAAATCTCAATATGTAATTGT  
TGCTGCAGATGGGGGAAAATTTGGTAAGGGGAAATCTGAGGAATTC CATGTTCTCTGTTCTTTAGGAGAA  
GACACGATCTGTGTGAGTGGGCTTACGGAGCGAATGTAGAAGCAGCACAAGCAATCCCTCCATCC TATG  
TTTACGATTC AAACCTTCTACCTGTAGAAGAAGTTGCGACTCCTAACATTCGAACAATTGAAGACTTAGA  
AGTCTTTTTTAAACACCCCTAAACATAAAATACTGAAAACCTTGTGTTAAAACCTCGCCAAAAAGACTCG  
GAGAAATTC TTTGCGATTTGTATCCGAGGGATCGTCAGATCAACTTAACCAAAGTTGCATCTTTCCCTAC  
AAGTTGATGACTGCGAGCTGGCTTCTGAGGAAGAGATCC TTAAGCATCTTCATGTTGAAAAAGGATTTAT  
CGGACCTCTATACTGTCTTATCCCTGTATGCAGACGAAACAACGCGCCCAATGACTAACTTCATCTGC  
GCAAAACAAACAAAAAGACGTGCAAGCATGTGAACTGGGGACGCGATATCCCTCTTCCAGCTTTTCG  
GAGACTTTCTTTTAGCAGAAGCTGGAGACCTTTGTCTTCAAATGGAGGAGCTCCCTATGAAATTTTCCA  
AGGCGTCGAAGTGCCTCATATCTTCAATCTGGGAACCCGCTATACGGAGAGCTTCTCCGTAAGGGTCCAG

GATAAAAATGGAGATAAACAGCTTTGCTGGATGGGACATATGGTATTGGAGTAGGGAGAACCCTTGCTG  
CATGCATAGAACAGCTCGCTGATAACAAAGGACTGGTTTGGCCTTTAGCTGTAGCTCCTTTCTCCATCAC  
CATTCCTATAACGGTGGTGATACGGAAGGAGAAGCCACCGCCTTACAACCTTTATCAAAGCCTGAATACT  
GAAGGCTTTGAGCCTCTACTAGATGATCGCAATGAACGCCTTGGGTTTAAGTTAAAAGACAGCGATTTAC  
TAGGTATCCCGTACAAATTGATCATCGGGAAGTCTTTCCAAAGTACAGGCTTATTAGAAATCGAATCACG  
CTCAGGAGAAAAATGTAATGTTTCTCCTGAAAACCTATTGGATTGGTGCTCTAAAAATCTTCCCTTGTCTAT  
ACAAGAAAGATCCCTCCACTCCGAGAACAAAACCTAGCACTCTTTAGTTGCGAGCGCTAAAATTCCTTGACC  
GGTGGAGACGGTTTTCTTATAATGACACCGACTTATGGAAAATAGAATAGAAATGTCCCAACTGCGAGCA  
TCGAAAAAAGATTCAAAGATTTCTGTATGTTCTACTTATGGCAACTAAGCTCTACCTAGAGAGTGGCCAA  
CAGTAGGCTCGAAACTTCTTGAGGAACTTATTGTTCCGATCTGAGTTCGGCAACGATACGAAATTACTT  
TGCTCAGCTTGAAACGAATGGATTTTTACGAAAAAATCATATCTCCGGAGGGAAGGATCCACAGATCTA  
GCTTTTCGTTATTATGCGGATCATAACGCGCCTTTTCTTGAGCAAGAAGAAATCTTAGCAATCCAAACAA  
AACTGACAGAGCTTCGGAATACAGCAAAAATATCGTAAAGGATCTGCAAAAAGCCTCAGAGGTGCTCTC  
CGATATTCGCAACTCCCTGTCTGCTTCTCTTCCACTCGTTTTGAAAGCGATTCGTTATTAATATTCAA  
CTCGTAGCTATAGATGATCAACGCGTAGTCTTTGTACTCTCAACTGAGTTTTGGCAAGTTTTTACAGATG  
TCCTTTGGCTACCTGAACAACCTACCTGAGAACTCTTAAAAAGAATTGAGGGTTTTCTACAAAATTACTT  
ACGCAACAACCTTCGATAGTCTCCTTTCTCAAAAAGAAGAAGATTTAGGGATGGTCTTGATAATGAA  
GTTGTGGTCCGTTACCTTACTGCTTACTGCCATTTTAGCGAGGAAGATCTGTACCAACAGGCCATCCA  
GATTACTCAAATACGAAACTTTCAAAGATCCGAAACGCTCGCTCAAGGTCTCGCTTTCTTTGAAAACCG  
TAAACACATGTGTCAACTTTTTAAATACTTACCTGCATAAGGAAACTCTACCGCATTATTGGTCGAGAG  
CTTACTGATATCGTTGGGAATACCGATCCCTCGTGTGCAGTAATTACTATTCCTTATTACATGGACCGTA  
CTCCTTTAGGTGCTTTCGGTGTACTAGGTCTATGAACCTGCCTTATCAACAGGTATTCGGCACACTGTC  
CTTATTCACAGAACGACTAAAAGTCAATTAACCTCAAGTTTTTACAAGTTTAAATTTGTCATTCAGAAGA  
CCTTGCCCGACCGACCTAGATGCTCACAAGACCAGCAGAGTGAAGTCTGGAGCTCTTCTATAAAATTAT  
TACCTGCTAAGGAGCTATCATGACAGAAACCCCAAATACCTCGTCGGAAGAAATTCAGACTAGCGAGCCT  
TCACCTGACAATGAAGTCAAGTGCTCCAGCAAGAAAACGCCAATTTAAAGGCTGAGCTGCAAGAACAGA  
ATGATCGATATCTGATGGCTCTCGCTGAAGCAGAAAACTCAAGAAAACGACTACAGAAAGAACGCACAGA  
AATGATGCAGTATGCTGTAGAAAATGCTCTTATGGATTTCTTCTCCTATCGAAAGTATGGAAAAGGCT  
TTGGGATTCGCTTCTCAAACCTCTGAAGAAGTAAAAAATTGGGCTATAAGGATTCCAAATGATCCCTTCAAC  
AATTTAAGCAAATCTTCGAAGAGAAAAGGTGTGGTTGAATATTCCTCGAAAGGAGAACTATTTAATCCGTA  
CCTGCATGAAGCTGTAGAAAATCGAAGAAACCACAACAATTCAGAAGGGACTATCTTGGAGGAATTTACT  
AAAGGTTATAAGATAGGAGATCGTCTATTCGCGTAGCCAAAGTGAAGTAGCAAAACTTCTGCTAAAG  
GAAACTCAGACAGTAACGAAGAAAAAATAAATATTCCTAGAAAATTAGGTGTTCAATATGAGCGAAAAAA  
GAAAGTCTAACAAAATTTATTGGTATCGACCTAGGGACGACCAACTCTTTCGCTCTCTGTTATGGAAGGTGG  
CCAACCTAAAGTTATTGCCTCTTCTGAAGGAAGTCTGACTACTCTTCTATCGTTGCTTTTAAAGGTGGC  
GAAACTCTTGTGGAATTCCTGCAAAACGTCAGGCAGTAACCAATTCGAAAAACATTTGGCTTCTACTA  
AGCGATTCATCGGTAGAAAATTCCTGAAAGTCAAGTCTGAAATTAACAGTCCCTTACAAAGTTGCTCC  
TAACTCGAAAGGAGATGCGGTCTTTGATGTGGAACAAAACCTGTACTCTCAGAAGAAATCGGCGCTCAG  
ATCCTCATGAAGATGAAGGAAACTGCTGAGGCTTATCTCGGAGAAACAGTAACGGAAGCAGTCATTACCG  
TACCAGCTTACTTTAACGATTCCTCAAAGAGCTTCTACAAAAGATGCTGGACGTATCGCAGGATTAGATGT  
TAAACGCATTATTCCTGAACCAACAGCGGCCGCTCTTGCTTATGGTATTGATAAGGAAGGAGATAAAAA  
ATCGCCGCTTTCGACTTAGGAGGAGGAACCTTCGATATTTCTATCTTGGAAATCGGTGACGGAGTTTTG  
AAGTCTCTCAACCAACGGGATACTACTTTGGGAGGAGACGACTTCGACGGAGTATCATCAACTGGAT  
GCTTGATGAATTCAAAAACAAGAAGGCATTGATCTAAGCAAAGATAACATGGCTTTGCAAAGATTGAAA  
GATGCTGCTGAAAAAGCAAAAATAGAATGTCTGGTGTATCGTCTACTGAAATCAATCAGCCATTCATCA  
CTATCGACGCTAATGGACCTAAACATTTGGCTTTAACTCTAACTCGCGCTCAATTCGAACACCTAGCTTC  
CTCTCTCATTGAGCGAACCAACAACCTTGTGCTCAGGCTTTAAAAGATGCTAAAATTTGTCGCTTCTGAC  
ATTGATGATGTTCTTCTAGTTGGCGGAATGTCCAAGATGCCTGCGGTACAAGCAGTTGTAAAAGAGATCT  
TTGGTAAAGAGCCTAATAAAGGCGTCAATCCAGATGAAGTTGTAGCGATTGGAGCTGCTATTCAGGGTGG  
TGCTCTCGGCGGAGAAGTGAAGACGTTCTGTTGTTGGATGTGATTCCTCTCTTTAGGAATGAGACT  
CTAGGTGGGGTCATGACTCTTTGGTAGAGAGAAAACCTACAATCCCTACTCAGAAGAAGCAAACTTCT  
CTACAGCCGCTGACAATCAGCCAGCAGTACTATCGTCTTCTTCAAGGTGAACGGCCTATGGCGAAAGA  
CAATAAGGAAATTGGAAGATTTGATCTAACAGACATTCCTCCTGCTCCTCGCGCCATCCACAAATTGAG

GTAACCTTCGATATTGATGCCAACGGAATTTTACACGTTTCTGCTAAAGATGCTGCTAGTGGACGCGAAC  
AAAAAATCCGTATTGAAGCAAGCTCTGGATTAAAAAGAAGATGAAATTC AACAAATGATCCGCGATGCAGA  
GCTTCATAAAGAGGAAGACAAACAACGAAAAGAAGCTTCTGATGTGAAAAATGAAGCCGATGGAATGATC  
TTTAGAGCCGAAAAAGCTGTGAAAGATTACCACGACAAAATTCCTGCAGAACTGTTAAAGAAATGGAAG  
AGCATATTGAGAAAGTACGCCAAGCAATCAAAGAAGATGCTTCCACAACAGCTATCAAAGCAGCTTCTGA  
TGAGTTGAGTACTC GTATGCAAAAAATCGGAGAAGCTATGCAGGCTCAATCCGCATCCGCAGCAGCATCT  
TCTGCAGCGAATGCTCAAGGAGGGCCAAACATTAATTC CGAAGATCTGAAAAAACATAGTTTTCAGCACAC  
GACCTCCAGCAGGAGGAAGCGCCTTCTACAGACAACATTGAAGATGCTGATGTTGAAATTGTTGATAA  
ACCTGAGTAAGATGCTTTATTCATCTTCCCTTAAGCAAGAGCCTCTTGAAAAAGGGGCTCTTGAGCTTTT  
TTTTAAAAAATCCTTCTCCTCTCTTCTTTCTTAAAGTAATTAATCCCTTTGTTTCATGTATGCTAGATAG  
TACGTATCTTGACTGTTATGGCATAAACACTATTTCTAAGAGATGTTGCATCATCAAAAACCGGCTGCC  
TACTAACCCAGACTTCAAGATGCAAAAACATTCCTTGGGGT TTGAGAAGTAA GAATGTACCGGCAGTA  
CGACAGTAATGGAGTTAGCTTGTGGGAAAAGCTAAAAACAAAAAGAAATTTCTAAAAAATAGAAAAGCAG  
GTTCTGGTTCCTGGTACCTTATTCGTCCATTC TAGAAAGGGCTTTGGATTTGTATCC CCAGATCAACCG  
AGTTATATCCTTTTGATATTTTCATCTCAGCTAGCGACTTAAAAGTGCTTTGGATGGAGATCATGTTCT  
CGTGGCTCTCCCTTTTCTCTTCGTGGAGGAGAAAAAGAAAAGGGTTCATTCATAAAGTTCTTTCTCGA  
GGGAAAACAGTCTTAGTAGGGACTATTGTCTCTCTTATCAATCCAACTCTAGCTATGGTTTGTGTGAATA  
CCATAGGCCCTGAACATCCTTTTAAAAGCCGAGCTCTTACCTAAAAGGACTTACAAACTGGGAGATCGGTT  
GTTACTAAAACTCCTGTGTGGAAGGA GAATATCC CAGTAAAGAACCACCTCCCTTGCGTATGCTGGAA  
TTTTATAGGCAATATCTCTAATGCTAAGACAGATTTTCTGTTATTAAAGCCGAATTC TCTATTACAGAAG  
AGTTCCCGATGCAGTGGTACAGGAAGCTAGTCAGTTCTTACAAAAGCACGTAACACAAGCGTTACACTC  
GAGGAAAGATCTCCGAGATTTGTTATGTTTACCATAGACTCTTCCTCTGCTAAGGACTTTGACGACGCA  
GTCTCACTAACTTATGATCATGAGGAAACTATATTC TAGGTGTTTCATATTGCGGACGTCTCCACTACG  
TGACTCCAAATTC CGTTTTGGATAGAGAAGCTGCTAAACGGTGCAACTCGATCTACTTCCCTGGAAAAGT  
CATCCCTATGCTGCCCTCAGCCCTTCTGACAATCTGTGCAGCTTAAAACCTAATGTGGATCGCTTAGCT  
GTATCCGTATTTATGACTTTCTCTAAAGAGGGATTCCTTTCTGACTACC GAATTTTGCCTAGCGTCAATC  
GTAGTAAATACCGTATGACATACGATGAGGTAGATGAAATTATCGAGAAAAACAGACTCACCCCTATTTCT  
TAAAACATTTTAAAGATGGCTGAAT TGAGCCGTATTTTTTCTGACATCCGAGAACAACGTGGATGCACG  
CGTCTCGTTCTTCTTCTCGTTACGATGTCTCTTGATAATTTACAAGAGCCTGTAGCCCTTATCGAAAACA  
AACAAACAGCTGCTCATAAACTCATTGAAAGAGTTATGCTGAAAAGC GAATGAAGTGATAGCCTATCATAT  
TTCCCATCAGGGAATAACCATGCCATTC CGCACACATGAACCTCCTAATGAAGAAAGTCTCCTTGTGTTT  
CAAGAGACAGCAAAGGCTATGGGCTTACCATTACACAAAACCCCGGCGCAAGAACCAGATTACCAATATT  
TATTGCAGGAAACGACTGCAGGCCATCTTTGGAGCCAATCTTCATTCCTCAGTTTGTACGCAGTATGAA  
GACGGCTTCTTATTC TACGGAAAACAAAGGCCATTACGGTCTGTGCTTAGACTACTACACACACTTTACT  
AGCCCGATCCGCCGATACGTGGATTTGATCGTTCACCGACTGCTTTTCCATTC TCTCTGTAGAAGAAG  
AGCATCTTGAACAAATGTTTCGAGCCGCTCATCC CAAGAACGCATTGCAGCGAAAGCTGAGGGAGCTTT  
TGTAATATTAAGAAGGCTCGCTTCTGAAAAAATTCATAGAAGAGCAGCCTGCAACTCTTTATAAAGCT  
TTCATTATTACGGCATCCCGGAAGGGATCTCTTTTGTCTCCCA GAATTTTGTATGAAGGTTTCAATC  
CTGCGGCTAAACTACCTCAAGCGTACGTCTTCAAACAAAAATA GGATTAGAAGAACTTCTTGAACATTT  
GCGTCTGGAGCTGTTATTTCTGTGCAACTGGCTTCTGTACCTTGTCTCACACAGTCTATC GAGTGGACG  
TTGGTTGAAGCCACAAC TAAAGCTAAAGCAAAGCGTACCTCTAAAAAGAAAAAACA GAATCTGTCCAG  
CTAAAGAAAAGAAAAAGATTCTCTGCTAAAAAGAAAAAGGAGCTACCAAAACGAAGAAGGGCAGTGGAA  
AAATTAGATCCTTCAAATTATTCCTTACATGAATTTTTTGTCTGAGCGACTTTCTCCATTGAAAAAGAT  
TTTCTTAAACAAAACGTGCTTTACTTCTTGCAAAAAATCGGTAACTTGCCGTTTCGTCTAGGCAGACT  
CGTCCGCTCTTTTTTCAAACCTCCCTTTTAGGAAGTTTTTGAAGGCGTTCTCAGATTTTCCC GAGTT  
GGAGGAGACTGGCCGGCACTACAAGCTCATATCAAGGTAAGGAAAAGATTTCCATGCATGACGCCCTCCAA  
AGTATTTTGGCTATCC AAGAGCTCGATATTAATGATCCGTCTAATGC GGGT CAAAAAGAACATCAGA  
ACGAGCTCGTAAAATTC AAGCTTTAAAAAC GGATATCCGTGCGCAAGGTGGAAGAAAAAGAACAAGAAAT  
GGAGAAGCTGAAAGATCAGATCAAAGGCGGAGAAAAACGTATTC AAGAAATTTCTGATCAGATCAATAA  
TTAGAAAATCAGCAAGCTGCTGTAAAAAAT GGATGAGTTTAAATGCTCTAACCC AAGAGATGACCGCAG  
CTAATAAAGAGCGTCGCACTTTGGAGCACC AACTTAGCGATCTTAT GGATAAGCAAGCTGGTAGCGAAGA  
TCTTCTTATCTCTCTGAAAGAAAGTCTCTTCTACGGAAAATAGTAGCAGTGCTATCGAAGAAGAAATT  
CGAGAGAATATTC GAAAAATTAATGAAGAAGGTCGTTCTTTACTAAGTCAGAGAACACAGCTGAAAGAAA

CGACAGATCCAGAATTATTTAGCGTCTACGAGCGCTTGCTCAACAACAAGAAAGACC GAGT TGTGTGCC  
TATCGAAAATCGTGTGGTTCAGTGGCTGTCATATAGCTCTT ACCC CGCAACATGA GAAT TTGGTACGTAAA  
CAAGATCATCTTGTATTTTGTGAACACTGCTCAA GAATTC TTTACTGGCAA GAGT TGCAAGCTCCATCAG  
CAGAAGGCGCAACTACAAAACGTCGTCGTCGTCGCTACTGCAGTATAACGAACTAATCGGAA GAGT AAGGC  
AACCGCTGAAACCAGCTTTTTTAAAAAAGAT GAGT ACCAGAGGAAAGTCCGGACTTTATAAGAAAAGATGC  
TGGAGAA ATTC CAGGGGCGTAAGGCTACGGAAAGTGCAACAGAAAAC ACTC CGCTATAAATTGTATAAT  
TTATAGACAGGCTGAAAAATCTTACTTTAG GAGT AAGAGCTGCTAGGGAAACCTAGCAGACTTGTAA ACC  
CCATCTGAAGCAAGAGAAAAAGTTATTTGTTTCTGCAACAACCTTTCTAACGAAAGGCACAGGCTTTTTT  
CATAATCGCTTGAG GAGT ACAGTAATGTGCTCCCTAGAT GAAT GGTTGCCCGCAAGCAAGAACTTCCGTT  
CGTGCTTGTGACAGA GAATCCGGCTT ACTC GCTCTTCCGAGCTTTTTTTATTATAATA ATCC TGCACGTGC  
TAACGCATGCATGTGTAGTAGCCCAACAATGAAACGTTGTTGTTGAGCATCAACTACAGGAAGTACGGTC  
ACAGGAT TTCCAG ATTC CATCATTTCTAAGCTCAATAGTAC ATCCGAATCC TCAGAAATAACTTTA GGGT  
TACGTGTCATGATCTGTTGTAAC GGGT AAGCTAAAATATCTCCTCCGT ATTC AGACA ATCC TCTACGTAA  
ATCTCCATCTGT GAATATCCCTAATA ACTC GAAAAAGCTCATTTACTACACAGACAC ACCCAT ATCC ATAC  
GAAGAAAGTATAGGAAGAG ACTC TGCAACAGTAGTTAATGGAGAGCAGAAAGGC ACTTCAGTTCTT GGGT  
ACAAAATAATCTTTGACTTTTCC ATTC GCTTTCAAGCCTATCTGTCCACTGGGAT GGTTGCTCCCATAA TC  
CGACAAGGAAATTTTCCGACAACGTAACAGTGTCA TTGCTAGAAAGATCAGAAAAAAGTAATTGGCATGTG  
GTTGAGGTTGTAGGCATAAGATCAAAA GGAT CTA ACTC TTCTAACTTTGGCAGTACAACAACAAAATCAG  
AAAAAGCGGCTAAA ACTC GAGCACGGTGCAGCAGTGATACCAACAAGAAAAAT GGGT CT ATTC TTCAAATG  
CGGAATCCATTC TAAAATCTCTC GAGT TTCACCACTATTTGAAAAATAGACAAAACGATATCTCCTGGAGAA  
ACA ACCCCTAAATCTCCATGGAGAAGATCTCCTGAAAGGAAAAAGC TTTCTCCCAAAGATTGCATCG  
TCGCCACTAACTTACGGGCGATGCAACC ACTC TTTCT ATCC CAGAAAAAATACTG ATCC CTGATGACA  
AAGAAGTTTTTCTGTGAGCTGATGAACGCAATCATAATGAAAGCTAGCGAAATACTGAGAAATAACCTGT  
TTTTGCTTATGAAAAATATCTAAACAAGGTTCTCTGCAATGCC TGGTACGTACATTACTTTACC GCTA  
TATTA AAAAATGCTTCTAGCTCATCGTAACAG ACTC TAAGCGATTTTTTCAAAGCTGTTAAAA ACTC TC  
CACCGTAA ATTC CATCCAATACTC GATGGTGCAGAAAGTTAAAGTGACATACATCTTTCTAATGGCTAA  
CGAGT CATCATCACGTACAACC ACTC GTTTTT GAAT TGTTCCG ATCC CCAAATCGCTACTTCC GGAT AA  
CGAAT TATCGGCATGCCAATAAGAGCTCCAGTCATACCAAAGTTGGTTACAGTGACGCTTCCCCCTTTTCG  
TTTCTGAG GAAT CTAATTTATTAGATCGCGCCCTTGAAGAAAG ATCC GCAAGAACCTTAGCAATACTTAC  
AAG ACCCCT ATCC TGACAATTAT GAATAACAGGAACA ACTACTC CTTCTTT ATTC AAATTTACAGCAACT  
CTACATTTATAGCCTTCTTGGAGACAATCGT ATCC CCGTCTAAAGAACCATTAAGCAGTGGGAAC TGCT  
CTAAAGACTTAGCTAAGCACTGTATAATGAAGCTGGTGATCGT GAGT TTC ACTC CATGAGCAGCAGTAAA  
TCTCTCTCGTCCGCAGAGATGAG ATTC ATTAATCTGTAACATCTACATCAACAACCAGAGAAGCATGC  
GGCACCTCTTCTGAAGACTGTGCTAAAGAAGAAGCGATAGCCCGACGTAAAGGTGACAAAAG GAATTC TAT  
TTTCTCTTTTAGAACAGATC GGATCC CTAGGTTCTCTCTTGTGCGAAAGATAGCGTTCTAC ATCC TTACG  
AGTAATCC GTCCCCCTCTCCTGTCCCCGAGATCTTTTGTA ATTC TTGAAGATCTA ACCC TTCTCTTTGG  
GCAAATCC TAATACTGCGGGCGAGAGCCATTTCTGCTCTCTATCTAC GAAT GATTC TCTTCTAACAG  
GATTC TCCACAGGGCTTTTTTACAG GAGTATTC GCTGCAGCGGTTTCTCGAAACGCGCTAGAAT ATCTCC  
AGGGAAAACCTCTTCCCCTTCTGAAACCAGGC ACTC CTCCAAAATGCCAGCTTGAGAAGGAGCTA ACTC T  
GTAGCTATCTTATCTGTTGAGACCTCAATCAATGGCTCATCTTTTTGAAACAGGAT CTCCGACCTGTTTCA  
ACCATCGGACAACAATACCTCCAGATGCGGTCTCCCCTATTTTTGAAATCGAA ACTC GAACAT GAAT CT  
CCTTATTTCTGA ACTC GAAGGCTTTAGT ATTC TGTTA ACTC AATATGAGAAGAAGATGATCAACTGGCTT  
TTACAGATAAAAAATGCCTTTTGA GGGT TTAATAACATGAAAATCTGTAC ACTC ACCTGAAGGCGGTTAA  
GC ACTC CCTATGTTACTAAACATTTTTTGA AACACAGAAAAGACGCTTAAACCTTAAAGAAAACGAA  
GAGAGAAA ACCC TCTTCGTTAAAAGATCTCTAACCATGTTGAGGAA GGATATCC TCTTCC ACCC TCATTAG  
AAGAGGAGA ACTC ACCTTCTCCATCTGCAATATATAAAGTAACAAC TGC ATCC CCTA GAATATTC ATAGG  
AGT GCC TATGATATCTCTCAAACGATCG ATCC CAGCTAAGACTGCG ATCC CTT GGAT AGGGAGT CCCACA  
GAAGTGAGCACAG ACCC TAACGTAATC ATTC CTCTCCAGGG ACTC CTGCACTTCTACAGCAGA GAATG  
TCGCAGTCAAACTAAAAGAAGTAACTAGTTAAAAGAAGAGGACAAT TATATGCCTGAGCAATAAAAAC  
TGCGGCC ATCC CTTGAAAAATTGCCGTACCGTT CATGTTGACAGTCGCACCTAAGGGGAGCACAAAACCT  
GAAACTTCTGAAGAAACGCCGAGATTTTTTGA AACGCAGCGCATAGTAACAGGCAGTGTGTCAGAACTAC  
TAGCAGTCGATACAGCACAGAAATGGC ATCC ATCATCGACGACAAAACCTTGCTAAATGAGCTCCTGCA  
CCC TAATCGAACTAAGCCCC GAAT ATCAATATAGCATGACATATACAGGCTAAAATAATAGACAACAAGA

AACTTGCCTAATTGAAGTAGGACGGTCAGACCATGATTGCCAGATATCCAAGCCATACTTGCTGCAACTC  
CATAAGGAGCAAAAAGACATAATCATATTTACCATGCGCAGCATAATCTCATTACACCCGTGAACAAAACG  
TTCCACAGGGCGAGCAGCTTCTCCAGCTAAGCGCATAGCAATGCCGTGTAACAAAAGCAAAGATGATGATC  
TGTAAGGATATTCCTTCTACAAAAGAACGTAAAAGGATTTGAAGGAAACACCTGAGCGAATGTAGCTAAAA  
AATTCATCCCTCCAGATGATCCGGACGAAGCAAGATCCACTGCATTAACCTTGGAGATCACACCCCTT  
TCCAGGACTGAAAAACAGAGCAAAAAGCTAACCCAAATACCAATAGCAACGGAAGTTGTCGCTAGATACAAA  
CCCAAACCTTCTTAAGCCTATACGCCCTAATTTCTTCATATCGCTAATCGAAGCGATCCCAAACCATAG  
AGCAAAAGACTAAGGGATATACTACCATGCTGAGTAGATTTAAAAAGATATCCCAAAGGTTTCACAAA  
AACTGCTTTGTCTTCCAGAAATTAAGCCGGAACAACCCCGATAATTAGGCCTATAAAAATTTTCATCCAT  
AATTTTCATGTAGTTACCCCTTTATTCCTTCTGGATGGATTCTATTGCAATCCAACATGGCCACCATTCGTCT  
TTCATTGCAACGCAAGAAAACCGCATGCGGACTTCTCCAACCGCAATGATATTTCTTTCAGCAAGCGCT  
CCTATTTTTACGCTATCCTTTTCTGTACACAGGATACCAACTCCTGGCGCAAAAATGATTTTTCTTACAAA  
AAAGTTCTAACTCTTGCTTTGTATGCCCACATGGTCAGGTAATAGATACGTACCTAAAACATGAATCCC  
TGCATCTCTTAACATAGCTAAGAAATCCTTTAGGAAACCCTAACCCACAAAATACCCCCACACCTAGACCT  
TCCCAATGATCTCGAGGCATGTTTACAGATTGATTCACCAAACAATTTCCGAAATCTGAGGCTCGATCA  
CGATCTTCTCTTCGGGTGCAATCGATCCAACTCACGTTGATCGGAAGGCGAACATCTACCATTAATCAT  
GACGTAATCCGCCTTCGCCAATCTTCTGGGAAGTCTCGAAGTCTTCTTTTTGGGAAAAAAGAGCCTCCT  
CCAAAAGGATCCGAACCATTCATAATACAATCTCTACATCTTTATGAAGGCGATTGTATTGAAATCCGT  
CGTCCAACAACAAAACATCAAAAATCCCCAGCACTCTTCTCCGCAAAGGTTTTTCGGTCTTTTTGTATCCG  
TACCGCCCTGACGGCAAATGCTTGGCTAAGAGCAAAGGTTTCATCTCCAACACAAGAAGCGGTGTGAAGC  
GCTGGATTCACAATAGTAAACGCTTTTTTCTTACTATATTTCCCTTTGTATCCCTCTCGAAAGCACCGCAC  
AAGAAAGCCCTTTTCATGCAGTGCTTGGGCTAGCCATAACACCAAAGGAGTCTTTCCTGTCCCGCCAAC  
AACGATATTCCTTACACTCACCACTGTTGCTTGTACTTGATGAGGAGATTTTCGCAATCTTATGTGCGCAGC  
CAAACAGAGCCAGAAAACACTCTAGCTATGACTGCCCAAAGCCAGCCTAAACGATCAGACAAGGCTCCAG  
AAGTCGCAGATATGATGAGATGACGAAAAGGCTCTCGAATACCAGAAAAGAAACTGAATCTCATGGGCGC  
CCTACTCAAGTTCTTCTTAAACGAACAACCTGCAAAAACCTATGACAACCCCTAAAGGGCTGAGACAGACTC  
TTCGTCTCTTTACCCAGTAGCCTTCCAACGAGGGCATCCGAAAGGATCGCATATAAAACATTAATAAA  
TCAAGTTTCAAACTTGAATCATAAAAAGATTTCTTATACTTCTTTGTGCGAACGACCTCATAAGCAACAGC  
TGCAACAGAAGAAGAAAGGTTTAATGAATCTGCTTTCCTAACATAGGTAAGCTATGTTACAAAACTT  
CCATTC AACCAATCAGGCACAGCCCATCTTTTTCTGAGCCAAACACCACAACCGTCCGTTGGCAAAAAT  
CTTGATCAAAATAAAAAGTTTGTGCTGATGGAGTGTGTTGTGAAAACCTGCCATTCCTGTTGATGAACCA  
ATCCAAGACCTCTTCAAGAAGCTTGCCAAACAGGCATAGTGAATACTGTACCTAAAGAGGAACGAATT  
ACATGAGGATGTATAAATCGACTACAGGATCACAAAAGATGACTCATCCACCCCTGCTCCATCTGCGA  
TCCCTTAGCAAAGCTCCTATATTTCCAGGTTTTCTGCTTGTCAACAATCAAATAAAAAGGAGCCTGATT  
CTTTCGCTGCAATCCAAAACTCTTGGCAAGACAGCTCTTCTTTTCAAAAACAGCAATAAAAATTCCTCG  
GGATTCCTTTAAACGACAGTTTTTCCAAAATATCCCTTAGAACAAATACTTTTCAATACCAAGCGAAG  
TAAGCTCGCGATCAAGAGCTATCTCTTATCGGCAATTAGTTCTCCGCAAAATACATGCGAACAAACGGTA  
TCCAGAAATTAGGGCTCGATGAATCTCTCGAAACCCCTTCTAATAAAAAATATGTGCCATTACGTGCCCGC  
TGGCGCTTAAAGCAAGAGCACTCTTAACACGGGCATTATTTTTCCCTATAAACTCCATTGCGCAAACAC  
CCCTGAAGGCAACCGTTGATTCCTCACCACAAAAATTTCTCTTAAACGCCACCCCTGGAGAGGAAGC  
ATAGGAAGCGCTCTTCTAGCTAAACAATGCAAAAACCTCGGGAGTATGTCCCGGTGTATGTGAAGTAATCA  
GCATATGCGAGAAAGAACTAGAGAGGAGCTGTGAACACAACCTCTAATAAAGGGAAAAAATCGCGATCTAT  
TTTGAATGTCTCTCCATCAGGACCTCGCCCATAGGTAGGTGGATCCAAAAGAATGACATCATAAGTCTTT  
CCTCGACGAATTTCTTCTTCAAGAAGGAAAACACATCTTCTATAATCCAAAAACCCCTTTTATCTTGAA  
AAGGTTCCCTTCCAGTTTTTTTTGGGCCCACTTAACAGCTGCTTTAGAAGCATCCACATGATAAACTGT  
TGCTCCTTGTGAGCACAGAAAATAGAAGAAGCTCCAGTATAAGCAAAGAGATTCAAAACCTCTACATGAA  
GGCTTGGCTACAGAAGGTTGTAATCTTTCCAGAACCAGCATGCTCGGGGAAAAATACCTACATGACCAA  
AAGGAGTCAGCTTCAATAAACACGAAACAAGATCGATGGTTATCCACCATTCCTTAAAGATTTCTGTTGCG  
ATACCGCCATTGCCCTTGTCTCCCATACGAACAACTCAGCAGAATACTGCCCCATAAGGAGGGAGAG  
CTCTTTGGCCAAATAGCCGTGGCAGAAGAACAAGATTAAGCAAACATCCCTTAAATCGCTCTAGTTCTTAC  
CGTCCCCTACTATCTAACAACCTCGTAATCCATCATTTGCTGATCTCTTTTTTCGGCATGGAACGCATAATT  
GTGTCCACCTGCATTTTTGTCTCATATCAGGCTCCATATTCACGTGAGCACCCACCTGTTTTATAACCCA  
ATGAGGTGCGCGCTCGAGTCTCCGGAATCAAACCTAAGTAAAAGATGTCCCTTTAACTCGTGAATTTGT



CAAAC T GATGCCATCAATAGCAATGAAGCCTTTCTCTAAAATATAAGGCACTAAATTAGCTGGAGCCTTA  
AAAAACATATAGGATTTCTCTATGGCAATAATAGTGCCTATCCACAGACATGCCAGAGACAAAATGTC  
CTCCTATTTTCATCTCCTAATCGAACCGAGCGTTCTAAATTTACCATGGTTCCCACCGTATAATCTTTGAT  
GGTAGTCCAAGCCATGGTTTTCTCAGTCACATCAAAAAAGAGTAATTCGTA CTACTGTCGTTTTGACCA GAGTC  
AAACATATGCCATCGACGGAGAAGCTACTCCCCGAACCACATCGATCAACTTGCAGCAAAA ACTCCAA  
TCTCCATGGAATCCCGGAGATGGTGAATAAGATCTACCCGTGCGACTTCTTGAATAATGCCTGAAAACAT  
AGACAATTAATACTTTTGCTAGGTCGTGACAACAATACTTTTTAGCAATCTTGAAAACTAGATACACG  
AAAAAGCCCTCTCCGGATCTGATCAAGGCAAACAGCGGTTGCTTATAATCAAAAAATAATTAT ACTCCGA  
GACCGCCCGTAGAGAAAACCTTTCTAAGAAGAGGTTCTTTTCAACACAAGACACA GGATTTTTATCCATTA  
AAATAAAAACCGTGTTATCTTGAGCGTCTGCAGATATTAGGCGACTTTTGAAAAAAAATCACCACAAAT  
CACAATCAAGGAATGTGTACTAGATCCCCCAAGCTACCTCTTTCTTTTCAATTTCTGAAGGGCCTATCGTA  
GTAAACAAGGATCTAATATTTGAATTTTAGGAGGAATCTCCCATGCTATGCCCATTTTGTAACCATGGAG  
AGCTTAAAGTTATCGACTCTCGAAACGCACCA GAGTCAAACGCGATTAAACGCCGTCGC GAATGCTTACG  
TTGCAGCCAAAGATTTACAACCTTTGAAACAGTAGAATTAAGTGTACAGGTATTAAAGCGAGACGGTCGT  
TATGAAAAC TTCCAA GAATCAAAGCTCGTCAATGGAT TAAAAGCAGCTTCCAGCCATACA GAATTGAC  
AAGAACAAGTACAAGCAATCGCCTCTAATATCAACAAGATCTTCTTGAAAAACAAAATCGAGAAATCTC  
TACCAAAGAAATAGGCGAACTAGTAATGAAATATCTAAAAAAGCAGATATGATTGCGTACATTAGGTTT  
GCCTGTGTTTTACAGAAGATTTAAAAGATGTAGGAGAGCTAATGGAAGTCTTATTATCTGCAACACCAGATG  
GTGAAAAACAAACATGAAAAGGA GAATGTATGCCCTAACGGACGAAGAAATAGCCAATTTTAAAACAC  
GTCTTTTAGAAATGAAGGCTAAGTTGTCTCAT ACTCTAGAAGG GAATGCTCAAGAGGTCAAAAAACCTAA  
TGAGGCAACAGGCTATTC TCAGCACCAAGCAGATCAAGGCACAGATACGTTTGATCGAACTATCAGCCTG  
GAAGTTACTACTAAA GAGTATAAACTTCTTAGACAAATTGATCGTGTCTTAGAAAAAATTGAAGAAGCCT  
CTTACGGCATTGTGATGTAAGTGGAGAAGAAATTCGTTGGCAAGATTAATGGCAATCCCTTACGCTAC  
GATGACTGTGAAATCACAAGAAAAATTCGAAAAAGCCCTTCTTTCTGGAACTAGTTACAATGCCG ACCC  
GTTCTCTCCAACCTTCTTTACTCTCCTTCTCCTAGCCTCTATTGATTGGGTCTCAAACCTAGTTGTGTT  
ACTCAAGAGCTGCCAGCTCTCCCTC ACTCTCAGCTTTTTCTTTATAGCTACGTGTGGGGACATTTTTCT  
TTTTCTATTATTCCTCCTTCAATGAAGGAGCAGCCTTTGGACTCTTTGCCAATACAAAATCCCTCTTC  
TTATTTTCCGCGTTTGCCTAATCC TAGGCCTAGCCTTATTC TTGAGAATTAATATAAGTCTTTACATAG  
AAGAACAC GAATGTCTTAACTTGTATCC TCAGCTGGAGCTCTAGG GAATGTGGGTGATATCTTACTCAC  
GGTAAGGTTGTCGACTTCTTTTTCTTAGCTATTACTCTGGCGCTTTCTTCTTCAATTTAGCAGATG  
CGTTTATCTCTATAGGA ACCCTCCTTCTTATTGGTCACCTATACTTCACTAAAGAAAGTAAAAAATGCTT  
TTAACAAAAAATTC TTTCTTTCAA GGATCTCTCTACCAACAAAAAGGAAAAAAGGATAATATA GGGTA  
ATTTTCAAG GAATTTTAGTTTTAATCATATATTTTATGAGCGCTTTCTGTCTTTTTTGACCCTTTTCGA  
TGACTTTATTTGGTCATACATAGCATTTGTTTTGATTCCTTGCTCG GAGTTTTGTTACATGCAAATCT  
AAATTTGCACAATTTACTCAACTTCTGCGTTTTTCAAGCTATTC TACCATTTTCAAAGAAGCCTCGT  
CAAAAAAGAAAACCAAAGAAAGGTGTTCATCCGTTAAAAGTATTC TTTGCTCCGCAGGAGG GAATAT  
CGGCATCGGCAACGTTGTTGGGATAGTCACAGCTGCTAGTGTGGTGACCTGGAGCTCTTTTTGGGT  
TGGATAGCTGGAATCC TAGGGTCTATAGTTAAATACTCGAAGTCTATCTAGGTATTAATTC CGTCAGT  
CTGATGCCAATAATGTGTATCATGGCGGCCCTATGTTCTTCTTGATAAAGCCTATAGA ACCCGCATTGT  
TTCCGTTATCGTTGCTGTTCTCCTCTGTATTTATGGGTAGAGATCTACCAATTTTCAATTATTGCCAAT  
ACACTGGCCTCTTGCTGGATGTCCCTAAATTGATGGCCATTGCTTCTCTCCTCTTCCCTGGTTATGTATG  
CTGTGCAAGGAGGCTTGCAGCGGATAGGAAAAATCTGTTCCCTAGTTTT ACCCTTCTTCATGTTGGTCTA  
CTGCG GAATGGCTTTTTATATTTGATTCAAGAAATCCATACTCTTCCCGCGCTATTCCTTAGTATTTTC  
CGGTCGGCCTTTACAGGTCATGGAGCGATCGGA GGATTTGCAGGATGCACAGTGGCTTCCACTATTCGTC  
AAGGACTATCTAGAGCAGCTTATTCAGGAGATATTGGTATTGGGTTTGATTCATTATCCAAAGTGAAC  
ATCTGCAACAAATCC TCAGACACAAGCGCAGCTTAGTATCGTCG GAGTGATTGTGGACAACCTCGTATGT  
ACGCTAAGTCTTCTTATCGTTCTTGCCTTCTGGAGTGTGGCATCGAGCAGGACTCGAG GGATCAGAAATTG  
TAGAACAGGCTCTTCTCCTACTTCCCTTACATTCGTGATTTCCTTCCCGGCTTCTGTTTTGCTACAGG  
ATACACCACCATTTATTTTCAATTTCTTGTAGGGAAAAAGTGTGC GAATTTTCACTGCGGAAACAAAGGA  
TCTAAATTC TATACCGTCTATG GAAT TATAGCTCTGCCCGCTTCTGTTTTCTTCCACAGGATACAGCAT  
TACTTGTATGTCTGTTTCGGGAGCTCTATTGCTATGCCTCAATTTATTGGGGTATTC TTAATGCGAAA  
AGAGCTCATTTTTCCCAAAAAAGAGGGCGAAA ACTCTCGAGGTTTCTGAGTCCACTCTCTTCAATAAAG  
GAGAGA GAGTCATAAAGCTGTTGATGATCAAAAAAGACGTGCCTTATATATGGTCTCTAAACCTTGAAA

ATTTTTAGAAACATATAGGTGATTTTGGCCTTGTAACGTAATTTTTTCTATTATAGGAAGAGCTTTCCT  
GAAGAGA**ACTC**TAAAAGCCTTCTTGCTCAAGGACAAA**ATTC**CTCCAGACTTTTTAACTTTCAATGTCATA  
TAATGATGGCTTGCAACCAAGAACTTCTTTGCCTAGAGGCTTAGATTTGCTCAGCAAAA**ATTC****ATTC**  
TAATCTT**ACTC**CTACGATATTTT**ATCC**ATCAGACCACAATATTGATCTGCAAAGTTTCTCC**ACTC**ACGCG  
CTTTCCGTTGTAAGAACCTTGAAAAAGCT**GGGT**ACGAAGCTTACATTGTGCGGAGGCTGT**ATCC**GAGACC  
TGTTGTTGAAGACAGAACCAAAAGATTTTGATATCTCAACCTCTGCTAAACCTGAAGAAGTCAAAACGTT  
**ATTC**AAAAATTGT**ATTC**TTGTAGGCAAACGATTTTCGTTTGGCTCAC**ATCC**GTTTCCCAAACCAAATCATA  
GAGGTCGCTACCTTTAGATCTGGTAGCAACGAAGAAG**ACTC**CTTAATTACAAAAGATAATCTTTGG**GGAT**  
CTGCCGAAGAAGACGTATTACGCAGAGACTTCACGATTAACGGCCTTTTTTATG**ACCC**TAGCGCAGAAAT  
TATCATCGACTACACAGGCGGTGTTGA**GGAT**TTAAAAAATCGCTATCTCAGAACTATTGGAG**ATCC**TTTC  
CTTCGTTTCAAACAAG**ATCC**TGTGCGCATGCTGCGCCTATTAATAAATTTTATCTCGTTATGCTTTTACAG  
TAG**ATCC**TAAA**ACTC**TAGAAGCTCTTCAA**GAAT**CTCGTCACGAACCTTGTGAAAAGCTCTCAACCTC**GAGT**  
CTTTGAAGAAATCATCAAAGTTTT**GAGT**TCTGGG**GAGT**CTACCATTTTTTTTCCAGCTAGCTTCCGAACAT  
CGCGTCTAGAGATTTT**ATTC**CCTTACATGGCTAAGGCATTTAGCTTAAGTAAG**ACTC**TGCAAGATCAGA  
CTTTTCGCTTGCTTAACAGCATTAGACACTAAA**ATTC**AGAAACGCTCGTTCTGTTTCAGAAAGACACTTTCT  
GCTAGCG**ATCC**TATT**ATTC**CCTATTGTTAACTTCAATGTGCGGTACAAATATAGTCAAT**ACCC**AACGATG  
ACT**ATCC**AAAGTATCTTTGACTAT**ATTC**GAAACTTTTTGACT**GAAT**TTTTTGCCG**ACTC**ATTACTAGTT  
GTTCCAAGAAAAATTCATCTTGACA**ACTC**TGCTATTGCAAATGCAGTACCGGCTG**ACCC**CATT**GAAT**GC  
TATGAAGAAAGAAAAAATCTTTCTTCAATAGAAGATTGTTACGCCATGCCTACTTCCGAGAAGCTCTT  
TACTTACTAGAA**ATCC**GCAGTAAAGTGTATCTAAAAGTAGAGGCTACCTATGGAG**GAGT**GGCTTAAACATT  
AT**GAAT**TAGCATCG**GAAT**GACC**ATTC**CTATTTGAAATTGGGAAA**ATTC**TTCTCCCCTATCGATTACTACA  
AT**GAGT**TGTTATGTTTCCCAAAAAATTA**ACTC**TGTTTAT**ACCC**TCTAGGACT**ATTC**GCCAACCTCTTC  
TTTTGGCACAGCTTTTTGTGTTCAATGTTTTTAACTAGAAAGAAA**GGGTATTC**TGTCGTTCCCAAGATTT  
TTTTGGTATCTGTCCGGTACCGGCGCCGTTTTTCATGATTTGCCAC**GGAT**TT**ATTC**AAAGTCAGT**ATCC**TAT  
TGCTTTGTTGC**ATTC**GTTTAACTCTGATTATTTATTTCCGGAACCT**GAAT**ATCGCCTCTCTAA**ATCC**CCTT  
CCTGTTTCGAAAATAGCTTCTCTACTAGTCTCAGTAGCAACAGCGATCACGGTATCTTTTGCTATTGGAA  
CGCGTTACCTCCATCATATGACGT**GGAT**GGC**ATCC**CAAAT**ATCC**TCCATTT**GAAT**CTACCAGAAGC**GAG**  
**TTT**GTCATGGCAGCTGATAG**GGAT**GTATC**GGAT**TGACGATCTTCTCATTGAGATTTTT**ATCC**AGTGGTTC  
TATCTC**GAAT**ACAAAACCA**ATCC**GCCCTGCCCGCTCCTTTTTGGAAAGCAAGCCTACTAGGAG**GGAT**CTA  
TCTGCCTTCTCTATTTCCTAAGAACGGG**GGAT**CTCGTAAACGTGTTATGTTAT**GGAT**GC**GGGT****ATTC**CC  
TTCTTTAGCAAATCTACGTATCGCTTCACGAGAAGCTTTCCGCAAACCTTTTAGCAATAGCTGCTTTATT  
TCTGCGGGCGAACATAGTGGAGATACCTTTGGGAG**GAAT**TTATTAAAAGAAATGCACGCAAAAT**ACCC**TG  
AT**ATTC**ATTGCTTTGGCGTGGGGGACCGCAAATGCGTGCACA**GAAT**TTTCATGCACCTTTTACTATGGGA  
GAAATTTTCAGGTTAGC**GGATTC**TGGGAAGTACTTTTAGCACTACCTAAATTATGGTACCGCTATCAGCTT  
CTCTATAGAAAT**ATTC**TGAAAACAA**ATCC**GCGCACAGTGATTTGCATTGATTTCCCTGATTTTCATTTCT  
TATTAATAAAAAAATTACGCTCTCGA**GGAT**ATAAAGGAAAGATTGTTCACTATGTATGCCCTAGCATATG  
GGCTTGAGACCTTCACGGAAAACAGTTTTGGAAAAATATCTAGACCTGCTTTTACTAATACTTCTTTT  
GAACAAACTT**ATTC**AAAG**ATTC**AGCTCTGCGTACAGTCTATTTAGGGC**ATCC**TCTTTCTGAAACAATTA  
AAAGCTTTTCTCCAATCTAAATTTGAAAGATCAGCTCCATCTTCTACCGATAAACCTTTTCATTGCAGC  
GTTTCC**GGT**AGCCGTCGCAGCGAT**ATCC**TGCGTAATCTAACC**ATTC**AAGTGCAGGCCTTTCAAGC**ATCC**  
TCTCTTGC**ATCC**ACACACCATTTACTTGTATCGTCTGCAA**ATCC****GAAT**ATGACCATCTT**ATCC**TCGAAG  
TGCTTCAACAGAA**ATCC**CGGTGTTTGCACAGTCATATTGTTCCCTTCCAGTTTTCGTTAT**GAAT**TAATGAGAGA  
**AT**GTGATTTTGGCCTCGCCAAATGTGGAACCTATCGTCTTAGAAACGGCTCTCAATCTA**ACTC**CTACGATC  
GTCACTTGCCAGCTCCGACCTTT**GGAT**ACTTTTTTAGCTAAGTATATCTTTAATATT**ATCC**TTCCAGCCT  
**ACTC**GCTCCCTAATATC**ATTC**TAGGCAGAACGATTTTTCT**GAATTC**ATAGGTGGGAAAAAGATTTTCA  
ATATGAAGATGTTGCTGCTGCTCTAAAC**ATTC**TGAAAACATCTCAAGCTCAAGAAAAACAAAAG**ACTC**CT  
TGCAGAGATGTGTATCAAGCAATCAAT**GAAT**CTGC**ATCC**TCTATGAAA**GAGT**GTCTTTCTCTCAT**ATTC**G  
AAACAGCTTCTAATAGATTATCAAAGACTTATAAAAAATCTT**GGAT**CGCTAGAAAAGCGCTTTCTGTTT  
ATAGTTCCCGTTCAAACAATGTCTTAAGATGTTTATAACAAAGGAACCTTAT**GAAT**C**GAGT**TATAGAA**AT**  
**CC**ATGCTCACTACGATCAAAGACAACCTTCTCAATCTCAAATACAACTTCTTAGTACATC**ATCC**TTAT  
CTT**ACTC**TT**ATTC**CCAAGTTTCTACTAGGAGCTCTAATCGTCTATGCTCCTT**ATTC**GTTTGCAGAAAT**GG**  
**AA**TAGCTATTTCTGGACATAAAACAAGGTAAGATCGAGATACCTTTACCATGATCTTCTCCTGTCCTGA  
AGGCACATAATTACATCATCAATCGCAA**ACTC**AT**ACTC**AGTGATTTCTCGTTACTAAATAAAGTTTCATCA

GGGGAGCCTTTTCGGAATCTAGCAGGAAAATTTCTTCTTAGGAAAAATTC TTCTGCGTCCATTCATT  
TTAAACACATTAATATCAATGGTTTTGGAGCCG GAGTCTTTTCTGAATCC TCTATTGAATTTACTGATTT  
ACGAAAACCTTGTTGCTTTTGGATCTGAAAGCACAGGAGGAATTTTACTGCGAAAGAGGACATCTCTTTT  
AAAAACAACCACCACATTGCCTCCGCAATAATATCACCAAAGGGAATGGTGGCGTTATCCAGTCCAAG  
GAGATATGAAAGGAAGCGTATCC TTTGTAGATCAACGTGGAGCTATCATCTTTACCAATAACCAAGCTGT  
AACTTCTTCAATGAAACATAGTGGTCTGGAGGAGCAATTAGCGGTGACTTCGCA GGATCCGAATTC  
CTTTTCTTAATAACCAACAAATTACTTTTCGAAGGCAATAGCGCTGTGCATGGAGGTGCTATCTACAATA  
AGAATGGCCTTGTC GAGTCTTAGGAAATGCAGGACCTCTTGCTTTAAAGAGAACAACAATAGCTAA  
CGGGGAGCTATATACACAAGTAATTTCAAAGC GAATCAACAAACATCCCC ATTC TATTCTCTCAAAAT  
CATGC GAATAAGAAAAGCGGAGCGATTTACGCGCAATATGTGAAC TTAGAACA GAATCAAGATACTATTC  
GCTTTGAAAAAATACCGCTAAAGAAGCGGTGGAGCCATCACCTCTTCTCAATGCTCAATTACTGCTCA  
TAATACCATCACTTTTCCGATAATGCTGCCGGAGATCTTGGAGGAGGAGCAATTC TTTCTAGAAGGGAAA  
AAACCTTCTCTAACCTTGATTGCTCATAGTGGTAATATTGCATTTAGCGGCAATACCATGCTTCATATCA  
CCAAAAAGCTTCCCTAGATCGACACAATTC TATCTTAATCAAAGAAGCTCCCTATAAAATCC AACCTGC  
AGCGAACAAAACC ATTC TATTCTTTGATCC TGTTCATGGCATTGTCAGCATCATCTTCCCCTATA  
CAAATCAATGCTCCTGAGTATGAACTC CTTCTTCTCACCTAA GGGTATGATCGTTTTTCTC GGGT GCGA  
ATCTTTTAGATGATGCTAGGGAAAGATGTTGCAAATAGAACATCGATTTTTTAACCA ACCCGTTTATCTATA  
TAATGGC ACCCTATCTATCGAAAATGGAGCCATCTGATTGTCCAAAGCTTCAAACAGACCGGAGGACGT  
ATCAGTTTATCTCCA GGATCC TCCCTGGCTCTATACACGATGAACTC GTTCTTCCATGGCAACAT ATCCA  
GCAAAGA ACCCTAGAAAATTAATGGTTTTAAGCTTTG GAGTAGATATCTCTCCTTCTAATCTTCAAGCAGA  
GATCC GTGCCGGCAACGCTCCTTTACGATT ATCCGGATCC CCATCT ATCCATGATCC TGAAGGATTATTC  
TACGAAAATCGGATACTGCAGCATCACCATACCAAATGGAAATCTTGCTCACCTCTGATAAAAACGTAG  
ATATCTCAAATTTACTACTGATTC TCTAGTTACGAACAACAATCA GGATTC CAAGGAGCCTGGCATT  
TAGCTGGCAGCCAAATACTATAAACAATACTAAACAAAAAATATTAAGAGCTTCTTGGCTCCAACAGGA  
GAATATGTCCTT GAATCCAATC GAGTGGGGCGTGCCGTTCTTAATTC CTTATGGAGCACATTTTTACTTT  
TACAGACAGCCTCTCATAACTTAGGCGATCATCTATGTAATAATCGATCTCTT ATTC CTACTTCATACTT  
CGGAGT TTTAATTGGAGGAACTGGAGCAGAAATGTCT ACCCACTC CTCAGAAGAAGAAAGCTTTATATCT  
CGTTTAGGAGCTACAGGAACCTCTATCATACGCTTA ACTCCCTCCCTGAC ACTC TCTGGAGGAGGCTCAC  
ATATGTTCCGAGATTC GTTTCGTTGCAGACTTACCAGAACACATCACTTCAGAAG GAATGTTCAGAATGT  
CGTTTTA ACCCATGCTGGGG ACCCTTACTGTCAATTC TACATTATGTGCAGCCTTAGATCACACGCG  
ATGGTCCGCATATGCTCCAAAAAGATCACACCTATGGGAAATG GGATACATTC GGTATGCGAGGAACAT  
TAGGGCCTCTTATAC ATTCCTAGAATATGATCAAACATATGCGCGTATTC TCAATTC GCCAACATCGAAGC  
CACAAATATCTTGCAAAGAGCTTTTACTGAAACAGGCTATA ACCCAAGAAGTTTTTCCAAGACAAAACCTT  
CTAAACATCGCC ATCC CATAG GGAT TGGTTAT GAATTC TGCTTAGG GAATAGCTCTTTTGCTCTACTAG  
GTAAG GGATCC ATCGGTT ACTC TCGAGATATTAACGAGAAA ACCCATCCACTC TTTGCTCACCTGGCTAT  
GAATGATTTTGCTTGGACTACCAATGGCTGTTTCAACCTCTGCACACACATTGGCAAATCAATTG  
ATTC TTCGCTATAAAGCATGTTCTTATACATCACGGCATATACTATCAACCGTGAAGGGAAGAACCTCT  
CCAATAGCTTATCC TCGGAGGCTATGTTGGCTTCTAATATAACCTTGGAGGTGAACATTTTTTAAAAAC  
CTCTGTATCTTCCTAGTAAATTAGGCAAG GAATACCTTGCCCTAATTTACTTTTTCTGATTTATCTAACGCC  
TATC GAGTTCGTACAT ATTC AATAGGTTTGTCTTCTATGAAATGGCTGTGAGCTACTGCGGTGTTTGCTG  
CTGTCTCCCCTCAGTTTCAGGGT TTTGCTTCCCAGAACCTAAA GAAT TAAATTTCTCTCGCGTAGGAAC  
TTCTTCCCTTACCCTTTTACTGAAACAGTTGGAGAAGCTGGGGCAGAATATATCGTCTCTAGTAACGCA  
TCTTTCACAAAATTTACCAAC ATTC TACTACCAATAACAACACTC CCACGAACTCAA ACTC CTCTAGCT  
CTAACAGAGAGACTGCTTCCGTTTCTAAGGATAGTG ACTCTACAACAACGACTC CTGATCC TAAAGGTGG  
CGGCGCTTTTATAACGCGCACTC CGGAGT TTTGTCTTTATGACACGATCAGGAACAGAAGGTTCCTTA  
ACTC TGTCTGAGATAAAAATGACTGGTGAAGGCGGTGCTATCTTCTCTCAAGGAGAGCTGCTATTTACAG  
ATCTGACAGGTCTAACC ATCC AAAATAACTTATCC CAGCTATCC GGAGGAGCGATTTTTGGAGGATCTAC  
AATCTCCCTATCAG GGAT TACTAAAGCGACTTTCTCCTCCA ACTC TGCAGAAGTTCCTGCTCCTGTTAAG  
AAACCTACAAAACCTGAAGCTCAAACAGCAGGCGAAACGTC GGGT TCTAGTAGTTCTAGCGGAAATGATT  
CGGGCTTCTCCTCCAGTTCAGTAAAGCTGA ACCC GCAGCAGCTAATCTTCAAAGTCACTTTATTTGTGC  
TACAGCT ACTC CTGCTGCTCAAACCGATACAGAAAACATCAACTC CCTCTCATAAGCCA GGATCTGGGGGA  
GCTATCTATGCTAAAGGCGACCTTACTATCGCAG ACTC TCAAAGGTACTATTC TCAATAAATAAAGCTA  
CTAAAGATGGAGGAGCGATCTTTGCTGAGAAAGATGTTTCTTTTCGA GAATATTACATCATTAAGTACA

AACTAACGGTGCTGAAGAAAAGGGAGGAGCTATCTATGCTAAAGGTGACCTCTCAATTCAATCTTCTAAA  
CAGAGTCTTTTTTAATTC TAACTACAGTAAACAAGGTGGTGGGGCTCTATATGTTGAAGGAAATATAAACT  
TCCAAGATCTTGAAGAAATTC GCATTAAGTACAATAAAGCTGGAACGTTCAAAACAAAAAATCACTTT  
ACCTTCAAAGCTCAAGCATCTGCAGGAAATGCAGATGCTTGGGCCCTCTCCTCTCCTCAATCTAGTTCT  
GGAGCAACTACAGTCTCCGACTCAGGAGACTCTAGCTCTGGCTCAAACCTCGGATACCTCAAAAACAGTTC  
CAGTCACAGCTAAAGGCGGTGGGCTTTATACTGATAAGAATCTTTCGATTACTAACATCACAGGAAT TAT  
CGAAATGCAAATAACAAGCGACAGATGTTGGAGGTGGTGTCTACGTAAAAGGAACCTTACTTGTAAA  
AACTCTCACCCTTACAATTTTTGAAAAACTCTTCCGATAAACAAGGTGGAGGAATCTACGGAGAAGACA  
ACATCACTTATCTAATTTGACAGGGAAGACTCTATTC CAAGA GAAT ACTGCCAAAAAGAGGGCGGTGG  
ACTCTTCATAAAAGGTACAGATAAAGCTCTTACAATGACAGGACTGGATAGTTTCTGTTTAATTAATAAC  
ACATCAGAAAAACATGGTGGTGGAGCCTTTGTTACCAAGAAATCTCTCAGACTTACACCTCTGATGTGG  
AAACAATTC CAGGAAT CACGCCTGTACATGGTGAACAGTCATTACTGGCAATAAATCTACAGGAGGTAA  
TGGTGGAGGCGTGTGTACAAAACGCTTGCCTTATCTAACCTTCAAAGCATTCTATATCCGGGAATTC  
GCAGCAGAAAATGGTGGTGGAGCCTACACATGCCAGATAGCTTCCCAACGGC GGAT ACTGCAGAACAGC  
CCGCAGCAGCTTCTGCCGCGACATCTACTCCGAGTCTGACCCAGTGGCCTCAACTGCTCTAAGCACACC  
TTCATCTTCTACCGTCTCTTCAATTAACCTTACTAGCAGCCTCTTCACAAGCCTCTCCTGCAACCTCTAAT  
GAGAAA ACTCAAGATCC TAATGCTGATACAGACTTATTGATCGATTATGTAGTTGATACGACTATCAGCA  
AAAAACTGCTAAGAAAGGCGGTG GAATCTATGCTAAAAAAGCCAAGATGTCCCGCATAGACCAACT GAA  
TATCTCTGAGA ACTC CGCTACAGAGATAGGTGGAGGTATCTGCTGTAAAAAATCTTTAAAAC TAGATGCT  
CTAGTCTCCTTATCTGTAACAGAGAACCCTTGTGGGAAAGAAGGTGGAGGCTTACATGCTAAAAC TGTAA  
ATATTTCTAATCTGAAATCAGGCTTCTCTTTCTCGAACAACAAAGCAA ACTC CTC ATCCACAG GAGT CGC  
AACAAACAGCTTCAGCACCTGCTGCAGCTGCTGCTTCCCTACAAGCAGCCGACGAGCCGACCATCATCT  
CCAGCAACACCAACTT ATTCAGGTGTAGTAGGAGGAGCTATCTATGGAGAACAGTTAC ATTC TCTCAAT  
GTAGCGGGACTTGTGAGTCTCTGGGAACCAAGCTATCGATAACA ATCCCTCCAATCATCGTTGAACGT  
ACAAGGAGGAGCCATCTATGCCAAAACCTCTTTGTCTATTAGATCTTCCGATGCTGGAACCTCCTATATT  
TTCTCGGGGAACAGTGTCTCCACTGGGAAATCTCAAACAACAGGGCAAATAGCGGGAGGAGCGATCT ACT  
CCCCACTGTTACATT GAAT TGTCTGCGAC ATTC TCTAACAATACAGCCTCTATGGCTACACCGAAGAC  
TTCTTC ATCC TCAGGAAATTC TATTAAAGATACCATTTGGAGGAGCCATTGCAGGGACAGCCATT ACCCTA  
TCTG GAGT CTCTCGATTTTTCAGG GAATACGGCTGATTTAGGAGCTGCAATAGGA ACTC TAGCTAATGCAA  
ATAC ACCCAGAGCAACTAGC GGAT CTCAAATAGCATTACAGAAAAAATTACTTTAAAAAACAGTTCTTT  
TATTTTTGAAAGAAACCAAGCTAATAAACGTGGAGCGATTT ACTC TCCTAGCGTTTCCATTAAAGG GAAT  
AATATTACCTTCAATCAAATAC ATCCACTC ATGATGGAAGCGCTATCTACTTTACAAAAGATGCTAAGA  
TT GAGTCTTTA GGATCTGTTCTTTTACAGGAAATAAAGTTACAGCTACACAAGCTAGTTCTGCAACATC  
TGGACAAAATACAAATACTGCCAACTATGGGGCAGCTATCTTTGGAG ATCCAGGAACC ACTCAATCGCCT  
CAAACAGATGCCATTTTA ACCCTTCTTGCTTCTTCTGGAACATTACTTTTAGCAACAACAGTTTACAGA  
ATAACCAAGGTGGT ACTC CCGCTAGCAAGTTTTGTAGTATTGCA GGATACGTCAA ACTC TCTTTACAAGC  
CACTAAAGGGAAGACTATTAGCTTTTTCGATTGTGTGCACACCTTACCAAAAAACAGGTTCAACACAA  
AACGTTTATGAAACTTTAGATATTAATAAAAAAGAGAACAGTAAGCCATATACAGGAACTATTGTGTTCT  
CTTCT GAAT TACATGAAAACAAATCTTAC ATCC CACA GAATGCA ATCC TTCACAACGGAACCTTAGTTCT  
TAAAGAGAAAACAGA ACTC CACGTAGTCTCTTTGAGCAGAAAGAAGGGTCTAAATTAATTATGGA ACCC  
GGAGCTGTGTTATCTAACCAAAACATAGCTAACGGAGCTCTAGCTATCAAT GGGT TAACGATTGATCTTT  
CCAGTATGGGG ACTC CTCAAGCAGGGGAAATCTTCTCTCCTCCA GAAT TACGTATCGTTGCCACGACCTC  
TAGTGC ATCCGGAAGAAGCGGGGT CAGCAGGAGT ATACCAACAA ATCC TAAAG GGATTTCTGCAGCAGCG  
CCTTCAGGTTCTGCCGCAACT ACTC CAACTATGAGCGAGAACAAGTTTTTCTAACAGGAGACCTTACTT  
TAATAG ATCC TAATGGAACCTTTTATCAAAACCC TATGTTAGGAAGCGATCTAGATGTACCACTAATTA  
GCTTCCGACTAACACAAGTGACGTCCAAGTCTATGATTTAACTTTATCTGG GGATCTTTTCCCTCAGAAA  
GGGTACATGGGAACCTGGACATTA AATCTAATCC ACAACAGGGAAACTTCAAGCCAGATGGAC ATTCG  
ATACCTATCGTCGCT GGGTATACATACCTAGGGAT AATCATTTTTATGCGA ACTC TATCTTAGGCTCCCA  
AAACTC AATGATTGTTGTGAAGCAAGGGCTTATCAACAACATGTT GAATAATGCCCGCTTCGATGATATC  
GCTTACAATAACTTCT GGGT TTCAG GAGTAGGAAC TTTCTTAGCTCAACAAGGA ACTC CTCTTTCCGAAG  
AATTC AGTTACTACAGCCGCGGAAC TTCAGTTGCCATCGATGCCAAACCTAGACAAGATTTTT ATCC TAGG  
AGCTGCATTTAGTAAGATGGTGGGAAAACCAAAGCCATCAAAAAAATGCATAATTACTTCCATAAGGGC  
TCT GAGTACTC TTACCAAGCTTCTGTCTATGGAGGTAA ATTC CTGTATTTCTTGTCAATAAGCAACATG

GTTGGGCACTTCCTTTCCTAATACAAGGAGTCGTGTCCTATGGACATATTAACATGATACAACAATACT  
TTACCCTTCTATCCATGAAAGAAATAAAGGAGATTGGGAAGATTTAGGATGGTTAGCGGATCTTCGTATC  
TCTATGGATCTTAAAGAACCTTCTAAAGATTCCTTCTAAACGGATCACTGTCTATGGGGAACCTCGAGTATT  
CCAGCATTCGCCAGAAACAGTTACAGAAATCGATTACGATCCAAGACACTTCGATGATTGTGCTTACAG  
AAATCTGTGCTTCCGTGCGGATGCGCTGTGCAAGGAGCTATCATGAACTGTAATATTCCTTATGTATAAT  
AAGCTTGCATTAGCCTACATGCCTTCTATCTACAGAAATAATCCGTGTCTGTAATATCAGGATTTGTCTT  
CGAATGAAGCTGGTCAAGTTATCTGCGGAGTGCCAAC TAGAACCTCTGCTAGAGCAGAATACAGTACTCA  
ACTATATCTTGGTCCCTTCTGGACTCTACGGAACTATACTATCGATGTAGGCATGTATACGCTATCG  
CAAATGACTAGCTGCGGTGCTCGCATGATCTTCTAATTCCTTTTTGGCCAGCCTCTCAAAGGCTGGCCT  
TTACGATCTCTTAATACAAAGAAAACCCCTCTTACATATCTCTTAGGCCTTTTTGGGCTTATAGAAAAC  
TTGATTTTTTTTTCATTTATGATCTATTC AATACCTATCATCGTAGGTTGTTCAATTAGGTTATTTAAATT  
ATGAAATTTCTGTCAGCTACTGCTGTATTTGCTGCAGTACTCTCCTCCGTTACTGAGGCGAGCTCGATCC  
AAGATCAAATAAA GAATACCGACTGCAATGTTAGCAAAGTAGGATATTC AACTTCTCAAGCATTTACTGA  
TATGATGCTAGCAGACAACACAGAGTATCGAGCTGCTGATAGTGTTCATTC TATGACTTTTTCGACATCT  
TCCGGATTACCTAGAAAACATCTTAGTAGTAGTAGTGAAGCTTCTCCAACGACAGAAGGAGTGTCTTCAT  
CTTCATCTGGAGAAAATACTGAGAATTCACAAGATTCAGCTCCCTCTTCTGGAGAAACTGATAAGAAAAC  
AGAAGAAGAACTAGACAATGGCGGAATCATTTATGCTAGAGAGAAACTAACTATCTCA GAATCTCAGGAC  
TCCTCTCTAATCC AAGCATAGAACTCCATGACAATAGTTTTTCTTTCGGAGAAGGTGAAGTTATCTTTG  
ATCACAGAGTTGCCCTCAAACCGGAGGAGCTATTTATGGAGAGAAAGAGGTAGTCTTTGAAAACATAAA  
ATCTCTACTAGTAGAAGTAAATATCTCGGTGCGAGAAAGGGGTAGCGTCTATGCAAAGAAGGAGTATCT  
TTAGAAAATGTTACCGAAGCAACCTTCTCCTCCAATGGTGGGGAACAAGGTGGTGGTGAATCTATTCAG  
AACAGATATGTTAATCAGTGATTGCAACAATGTACATTTCCAAGGGAATGCTGCAGGAGCAACAGCAGT  
AAAACAATGTCTGGATGAAGAAATGATCGTATTGCTCACAGAATGCGTTGATAGCTTATCCGAAGATACA  
CTGGATAGCACTCCAGAAACGGAACAGACTAAGTCAAATGGAATCAAGATGGTTCGTCTGAAACAAAAG  
ATACACAAGTATCAGAATCACCAGAATCAACTCTAGCCCCGACGATGTTTTAGTAAAGGTGGTGGTAT  
CTATACAGAAAATCTTTGACCATCACTGGAATTACAGGGACTATAGATTTTGTGAGTAACATAGCTACC  
GATTC TGGAGCAGGTGTATTC ACTAAAGAAAACCTGTCTTGCACCAACACGAATAGCCTACAGTTTTTGA  
AAA ACTCGGCAGGTCAACATGGAGGAGGAGCCTACGTTACTCAAACCATGTCTGTTACTAATACAAC TAG  
TGAAAGTATAACTACTC CCCCTCTCGTAGGAGAAGTGATTTTCTCTGAAAATACAGCTAAAGGGCACGGT  
GGTGGTATCTGCACTAACAACTTTCTTTATCTAATTTAAAACCGGTGACTCTACTAAAAACTCTGCAA  
AGGAGTCTGGAGGAGCTATTTTTACAGATCTAGCGTCTATAACCAACAACAGATACCC CAGAGTCTTCTAC  
CCCTCTTCTCCTCGCCTGCAAGCACTCCGGAAGTAGTTGCTCTGCTAAAATAAATCGATTC TTTGCC  
TCTACGGCAGAACCGGCAGCCCCTTCTCTAACAGAGGCTGAGTCTGATCAAACGGATCAAACAGAACTT  
CTGATACTAATAGCGATATAGACGTGTCGATTGAGAACATTTTGAATGTCGCTATCAATCAAACACTTC  
TGCGAAAAAAGGAGGGGCTATTTACGGGAAAAAAGCTAAACTTTCCCGTATTAACAATCTTGAAC TTTCA  
GGGAATTCATCC CAGGATGTAGGAGGAGGTCTCTGTTTAACTGAAAGCGTAGAATTTGATGCAATTTGGAT  
CGCTCTTATCCCACTATAACTCTGCTGCTAAAGAAGGTGGGTTATTCATTC TAAAACGGTTACTCTATC  
TAACCTCAAGTCTACCTTCACTTTTGCAGATAACACTGTTAAAGCAATAGTAGAAAGCACTCTGAAGCT  
CCAGAAGAGATTCCTCCAGTAGAAGGAGAAGAGTCTACAGCAACAGAAAATCCGAATTC TAATACAGAAG  
GAAGTTCGGCTAACACTAACCTTGAAAGGATCTCAAGGGGATACTGCTGATACAGGGACTGGTGTGTTAA  
CAATGAGTCTCAAGACACATCAGATACTGGAAACGCTGAATCTGGAGAACAAC TACAAGATTC TACACAA  
TCTAATGAAGAAAATACCC TTCCCAATAGTAGTATTGATCAATCTAACGAAAACACAGACGAATCATCTG  
ATAGCCACACTGAGGAAATAACTGACGAGAGTGTCTCATCGTCTCTAAAAGTGGATCATCTACTCTCA  
AGATGGAGGAGCAGCTTCTTCAGGGGCTCCCTCAGGAGATCAATCTATCTCTGCAAACGCTTGTTTAGCT  
AAAAGCTATGCTGC GAGTACTGATAGCTCCCCTGTATCTAATTC TTCAGGTT CAGACGTTACTGCATCTT  
CTGATAATCCAGACTCTTCCCTCATCTGGAGATAGCGCTGGAGACTCTGAAGGACCGACTGAGCCAGAAGC  
TGGTCTTACAACAGAAACTCTACTTTAATAGGAGGAGGTGCTATCTATGGAGAACTGTTAAGATTGAG  
AACTTCTCTGGCCAAGGAATATTTTCTGGAACAAAAGCTATCGATAACACCACAGAAGGCTCCTCTTCCA  
AATCTAACGTCCTCGGAGGTGCGGTCATGCTAAAACATTTGTTAATCTCGATAGCGGGAGCTCTAGACG  
AACTGTCACCTTCTCCGGGAATACTGTCTCTTCTCAATCTACAACAGGTCAGGTTGCTGGAGGAGCTATC  
TACTCTCCTACTGTAACCATTGCTACTCTGTAGTATTTTCTAAAAACTCTGCAACAACAATGCTAATA  
ACGCTACAGATACTCAGAGAAAAGACACCTTTGGAGGAGCTATCGGAGCTACTTCTGCTGTTTCTCTATC  
AGGAGGGGCTCATTTCTTAGAAAACGTTGCTGACCTCGGATCTGCTATTGGGTGGTGGCCAGACACACAA

AATACAGAAACAGTGAAATTA**GAGT**CTGGCTCCTACTACTTTGAAAAAATAAAGCTTTAAAACGAGCTA  
CTATTTACGCACCTGTCGTTTCCATTAAGCCTATACTGCGACATTTAACCAAAACAGATCTCTAGAAGA  
AGGAAGCGCGATTTACTTTACAAAAGAAGCATCTATT**GAGT**CTTTAGGCTCTGTTCTCTTCACAGGAAAC  
TTAGTA**ACCC**CAACGCTAAGCACAACACAGAAGGCACACCAGCCACAACCTCAGGAGATGTAACAAAAT  
ATGGTGCTGCTATCTTTGGACAAAATAGCAAGCTCAAAC**GGAT**CTCAGAC**GGAT**AACCTTCCCCTGAA**ACT**  
**C**ATTGCTTCAGGAGGAAATATTTGTTTCCGAAACAAT**GAAT**ACCGTCCTACTTCTTCTGATACCGGAACC  
TCTACTTTCTGTAGTATTGCGGGAGATGTTAAATTAACCATGCAAGCTGCAAAAGGGAAAACGATCAGTT  
TCTTTGATGCA**ATCC**GGACCTCTACTAAGAAAACAGGTACACAGGCAACTGCCTACGAT**ACTC**TCGATAT  
TAATAAATCTGAG**GGATTC**CAGAACTGTAA**ACTC**TGCGTTTACAGGAACG**ATTC**TGTTCTCCTCT**GAAT**TA  
CATGAAAATAA**ATCC**TAT**ATTC**CACAAAACGTAGTTCACACAGT**GGAT**CTCTTGTATTGAAGCCAAATA  
CCGAGCTTCATGTCA**TTTCTTTT**GAGCAGAAAGAAGGCTCTTCTCTCGTTATGACACCT**GGAT**CTGTTCT  
TTCGAACCAGACTGTTGCTGATGGAGCTTTGGTCATAAATAACATGACCATTGATTT**ATCC**AGCGTAGAG  
AAAAATGGTATTGCTGAAGGAAATATCTTT**ACTC**CTCCA**GAAT**TGA**GAAT**CATAGACACTACTACAAGTG  
GAAGCGGTGGA**ACCC**CATCTACAGATAGTGAAAGTAACC**GAAT**AGTGATGATACCAAGGAGCAAAATAA  
TAATGACGCCTC**GAAT**CAAGGAGAAAGCGC**GAATGGAT**CGTCTTCTCCTGCAGTAGCTGCTGCACACACA  
TCTCGTACAAGAACTTTGCCGCTGCAGCTACAGCCACACCTACGACAACACCAACGGCTACAACCTACAA  
CAAGCAACCAAGTA**ATCC**TAGGAGGAGAAATCAA**ACTC**ATCG**ATCC**TAATGGGACCTTCTTCCAGA**ACCC**  
TGCATTAAG**ATCC**GACCAACAAATCTCCTTGTAGTGTCCCTACAG**ACTC**ATCAAAAATGCAAGCTCAG  
AAAATAGTACTGAC**GGGT**GATATTGCTCCTCAGAAA**GGAT**ATACAGGAAC**ACTCACTCT****GGATCC**TGATC  
AACTACAAAATGGAACGATCTCAGCGCTCTGGAAA**TTGACTC**TTATAGACAATGGGCTTATGTACCTAG  
AGACAATCATT**TCTAT**GCGA**ACTC**G**ATTC**TG**GGAT**CTCAAATGTCAATGGTCACAGTCAAACAAGGCTTG  
CTCAACGATAAAAT**GAAT**CTAGCTCGCTTTGATGAAGTTAGCTATAACAACCTGT**GGAT**ATCAGGACTAG  
GAACGATGCTATCGCAAGTAGGAACACCTACTTCTGAA**GAATTC**ACTTATTACAGCAGAGGAGCTTCTGT  
TGCCTTAGATGCTAAACCAGCCATGATGTGATTGTTGGAGCTGCATTTAGTAAGATGATCGGGAAAACA  
AA**ATCC**TTGAAAAGAGAG**GAAT**AACTAC**ACTC**ACAAA**GGATCCGAATATTC**TTACCAAGCATCGGTATACG  
GAGGCAAACC**ATTC**CAC**TTTGT**TAATCAATAAAAAAACGGAAAAATCGCTACCGCTATTGTTACAAG**GAGT**  
CATCTCTTAC**GGAT**ATATCAAACATGATACAGT**ACTC**ACT**ATCC**AACG**ATCC**GTGAACGAAACCAAGGA  
**GAAT**GGGAAGACTTA**GGAT**GGCTGACAGCTCTCCGTGTCTCCTCTGTCTTAAGA**ACTC**CTGCACAAGGGG  
**ATACT**AAACGTATCACTGTTTACGGAG**GAAT**TG**GAATACTC**CAGT**ATCC**GTGAGAAACA**ATTC**ACAGAAAC  
AGAAT**ACGATCC**TCGTTACTTTCGACAACCTGCACCTATAGAAACTTAGCA**ATTC**CTATG**GGGT**TAGC**ATTC**  
GAAGGAGAGCTCTCTGTTAACGATATTTTGTAGTACAACAG**ATTC**TCTGTAGCATAACATGCCATCAATCT  
ATCGAA**ATTC**TCCAACATGCAAATACCAAGTGCTCTCTCAGGAGAAGGCGGAGAAATTAATTTGT**GAGT**  
ACCGACAAGAA**ACTC**AGCTCGCGGA**GAAT**ACAGCACGCAGCTGT**ACCC**GGGACCTTTGTGG**ACTC**TGTAT  
**GGATCC**TACACGATAGAAGCAGACGCACATACTAGCTCATATGATGAACGCGGTGCTCGTATGAT**AT**  
**TC**TAAATAAAT**ATCC**TGGAAAGGCAGCTCTCGCAAGGGCTGCCTTCTAG**GAATCC**CTGCCTCCAGAAAAC  
**AACTC**TTGTTCTCACTAAAAAATCACAA**GAAT**CAAAACAAAAAAGACACACTTGCAGAGGTGAGGG  
CCACGCGAGCAAATGTGTCAGACGGAGAGAGAG**GGATTC**GAA**ACCC**TCGGTACGCGTTAACGCACACACGC  
TTTCCAAGCGTGCTCCTTAAGCC**ACTC**GGACATCTCTCCAAGAAAACA**AACTACT****ACTC**TCCAACA**ACT**  
**CGGCT**ATCGCCGGCAAAAAGACAGTAGAAAGAAC**ATTC**TTAGT**TTTTT**AAGATTTATCTCCAGCTTTTTT  
TCGTACAATTTTTGCTTTTTCTTTAAAAA**ACTG**TTCC**ACCC**CGTTTTCTAAAGCTTCTCTGCTCTGAA  
**CCC**CATATTACTAAAAAATTTATATGT**GAAT**GATTTAACGCGATTTCCCTAAA**GAAT**AAAATTTGTTGGA  
AGACAAGCCATTGAACAAAAT**ACTC**ACAATA**GAAT**AATGGTTCGTTGTTAATTTTTAAGATAATATG  
CGTT**ACTC**TTTT**ACTC**CTCTTTCTTTGG**GGAT**CACTTGTTCCTATGGAGACGAGGTTTCT**ACTC**GCA  
AGCAGATTTTGGTCAGCATTGTCCCTATAAATTTCTTGTGGAACAAATCGCGGG**GGAT**ACCTGTCAGGT  
GTTCTCTATTGTTAT**GGATA**ACCATG**ACCC**TCATAACTATGAGCTTTCGCCTAAATATATAGAAAAG**ATC**  
**CGCC**AGGTTGA**ACTT**GGTTTA**GAAT**TGGTGAG**GGAT**TTGAAAA**ACTT**GTGAGAG**GAAT**TATTTCTGTGCA  
AGCAAGTAGATCTAGCAGCAAATATCGATAAAATTA**CAAAT**GGGGCCTGCTGCCAGCGTTTTCTTAGT**TT**  
TGAT**ACCC**ACACCTGGTTAAGTCTAAAA**ACTAAAATTC**AA**ATCC**AGGCCATTACAGAAGCTTTAGTG  
GAGACCGCCCTGAACACGAA**ACTC**TGTACCGTAAAA**ACTG**TTCTTATTACAGTCTCAACTAGATCTTT  
T**GGAT**CAAAAGATTTCTTCTATTGTTCTAGTACATCAACGCAATGTTCTAGT**ATCC**ACGGAGCTTT  
TGCTTATTTCTGTAGAGATTACGGCTTTATAACA**ACTACT**ATCGAGCGAGCTAACC**ACTC**AGAGT**ATCT**  
CCTAAAGATGTTGTTCTGTAGAGCGAACC**ATTC**GTGATCACA**ACTTGC****ACTC**TGTAATTTTTGCTCAAGC  
ATGCGGGGAAACGTAGTAGCGCCGCTTAGTACGGAA**AGTTA**ATATGACGCCT**ATTC**TATT**GGATCC**CTA

TGCTGAAGATGTCTTCAATAATTTACTAGCTATCGCAACGGCTTTTGCAAATCTATGACAAAACAAATGC  
TATTAGA**GAAT**GTGTCCTTCCGCTATGGGAAAACCGTCCCCTAATTGTTGACCACGTCTCCTGCGAAGT  
CT**ATTC**TGGGGAT**TTCATTGGAAT**TATTGGGCCAATGGAGGGGGAAAAACA**ACTC**TC**ACCCAACTC**ATG  
CTGAGATTATTACAACCGGTGTGTGGAAGCATCTCTACCT**ATTC**TGTACAAGATCATCGCCCTCT**ATCCA**  
TAGGTT**GGGT**TCCCCAACATTTTCCCTATGATGCAGCATTTCCTATCACTGTAAAGGAAACTGTTCTGTG  
TGGAAGGTTGGCGACACTGCCTTGGTATGGACGTTATACACAAGAAGATCATGAAGCTGCTGAAGAAGCC  
CTTCTTACCCTTGATCTGATAGATTATAAAG**ACTC**TTGCTTTTCCATTTGTCAGGAGGCCAA**ATTC**AAC  
GTGTTCTCCTAGCTAGAGCTTTGGCTGCGCGTCT**GAATTC**CTTTTGTAGATGAGCCACAGCCAATAT  
CG**ACCC**CGTCAATCAACAAAAAATCTTACAG**ATTC**TTTCCGCTCT**GAAT**AAACACTGCACT**ATCC**TCATG  
ATC**ACTC**ATGATCTGCACCACACAGCAGGTTGTTTCAATC**GAGT**CTTTTTTCAT**GAAT**AAAACACTAACAA  
CTTTAGCAGACACCCTACAATTTAGAAAG**ATTC**TGCTGCAACACTTTTGGGAGATGCCCATGATCTCT  
**ATTC**CTGTTCTTTGTTCCCGCTCTTCT**ATTC**CTTCCGCTGCTGGCGGCTTTCCGGCCTCCATTGCTG  
CAG**GAAT**CGTAGGCTCTTATATTGTAGTGAACGCATTGTGTGATAGTGGAAAGCATAGCAC**ATTC****CAT**  
**TC**TAGGAG**GAGT**TGGTATCGCCCTATGGCTTCAATACCAATTTAATCTCCCTAT**ATCC**CCACTACAGGG  
GCTATTGCTAGTGTCTATCTTCGTAGCGATCTGTATTGG**GAAT**GTCCATCTTAAATACCATGAACGCGAAG  
**ACTC**CATCATTCTATGATCTGGTCCATTGGTATGGCTATAGGCATTATATGTATATCTAAGCTCCCTTC  
CTTT**AACTC**CAGAGCTCTCTGATTTTCTTTTTGGCAATATCTTAT**GGGT****ACCC**CACAAGATCTTTATTTTC  
CTTG**GGATCC**TAGATCTGTTTATCGTTGCTACCGT**ATCC**ATTTGTCACACACG**ATTC**TTAGCCCTATGCT  
TCGATGAGAAATACATGGCGTT**GAAT**CATT**ACTC**CATAAAAACCTGGTACCTATTGCTGCTTATCTTAAAC  
AGCAATTACGACTGTTGTTCTTATGTATGTATGG**GAGT****TATTC**TAATGTTGAGCATGTTAGTCC**TCCCA**  
GTATCAATAGCCTGTCGTTTTCTCTACAAAATGAGCCACATCATTTACATCGCATCTATCTTAAATATCG  
TCTGCTC**ATTC**CTAG**GAAT**TATGCTTGCTTATCTCCTAGACTTGCCAGTTGGGCTGTCATAGCG**ATTC**T  
CATGGGAGGAGCTT**ACTC**ACT**GAGT**TT**ACTC**TTGAACAGATCATAACAATGCATCT**ACCC**CTTCTCCTGTC  
AGCCCTGAAAGCAAAATA**ATTC**TTGATCAGGGAAC**TGCT**GTTTAAAGAAGAGCTACACGTTCTTCGCGCT  
CATCAGGCAGTAGCTGATCGATCTTATTTAAAGCGATGACCATGTCTTT**ATCC**TTAGCTCTTCTTTGTA  
AGCCAAGAGCTCCCCATTAAGATTTTAAAGATCTTGTTC**GGGTGAGT**GTCTTTCT**ATTC**CAGAGATATCG  
ATTAC**GAAT**AAACAGTAATCGCGTACGTTCAATATGCCGAAGGAA**TCCAATCC**CAATCCCGGTTTGGC  
ACGCTCCTTCAATA**ATTC**CTG**GAAT**ATCTGCCATGAT**CCAAGT**TTTTTGGATAGAGC**ATTC**CTTCTTGATG  
AACCAA**ACCC**AATGAAG**GGAT**GTAGCGTGGTAAAC**GGAT**AGGCACCGACTTTCACTTCTGTACGTGCAAGA  
**GT**GTTAAATAAGGTTGATTTACCAGCGTTAGG**GAATCC**AACGAGACCGATATCAGCTATTAATTT**GAGT**  
CCAGTTCAACCAAGC**GAAT**TTCTCCAGGTTTACCTG**GAGT**AGCTTTTGTGGAGCTCGGTTAGTCGATGT  
TTTAAAGAAAAC**ATTC**CCCTTACCTCCTCTGCCTCCCTGACAGACAACAATACGTTCCACC**ATCC**TTGGTG  
AAATCGTGTATCA**ATTC**TCCAGTGGCTGC**ATCC**CGTAAGAGAGT**CCC**CTCAGGAACTTTTAATACTAAGT  
CTTTACCCTTCTTCCGTGACGATTATTACTAGCACCAGCTTGCATCATCAGCTTTTAAAGGAAACGAAG  
ATTACGGT**ATTC**TTCAAAT**GAAT**ACAT**ATTC**GTCACTGTTTCGATAA**GAAT**AGAGCCCC**ATTC**CCCCA  
TTACCGCCGTAGGGGCTCCTTTGGGGAGATATTTCTCTTTTCTCCAAGCTACAACACCATTACCGCCTT  
TCCCGCGCGCA**ACTC**TAATGTAATTTGATCAACAAACATG**ACTC**GTCTTGAACAAACAAAAAAGCCC  
TATTTTACGCGTAGGCAAAAACAGAGCTTGAACAAACT**GAAT**TATAAATAAAAAATGAAC**TAAAGCT**TGTG  
**GGAT**AACAGAAACGTAAGTACGATCTGTTTTTTT**CATT**ACAACGATACC**ATCC**GCTAATGCAATAACGT  
ATCGTCTTCCCCCTACCAACGTTACTGCAG**GGAT**GCCATTTGGTTCCTCGTTGTCTAACC**AAAA**TGCTT  
CCAGTAGAA**ACTC**TCTGCCCTGCGCCAACTTTCA**ACCC**AAGACGCTTTG**ATTC****GAAT**CGCGACCGTTAC  
GGCTTGCTCCCTGACCTTTCTTATGTGCCATG**ACTC**AAAA**TCC**TTTATGTTCCCTACAATTTACATAAC  
CAAATCGTAATCTT**ACCC**GAAGGTAATTTT**GAC**GATGGCCGATTTTCTTGTGGTA**ATTC**TTACGTTTT  
TTGTACTTGTAAAGCCACAACCTTTTCTCCGCAACGAAAGAACTA**ATTC**CTCTTCACTACAGCGTTGC  
CAACTGTTGGAGCACCACCGAAGCTTTTTCTCCGTCAAAGTAAATAATACATCTTGA**AAAA**AGGACTTC  
TTTGTCTCTT**CAGAA****ATTC****CATCC**AACAGTT**CG**AGCTCTATAACGTCACCTTTGCGAACCTGGTATTGC  
TTATTTCCAGTCT**GAAT**TACAGCGTAAGGCTCCATCA**ATTC**TTTCCCTATAAACTTTACTTGT**TGAA****ACT**  
**CTCC****ATTC**TAGAAGGAAGCGCTGACTTGGCCGGAGAGCCCTGTTAGCGCTTAAAGCACACC**ATCC**CG  
AAGCGAACAAACAATAACTACTTCCACTAT**ATTC**GAAAAGACTTGTCCCTTTTTTTCTTATTTGGGAC  
ATGAGCAAACAACAAGCGGCTTGTAGAAATCTTCTA**ACTC**TTTTGCGCAAATGTGAATCTGT**CACA**  
AAAAAATTTAGAG**GAGT**TCTCCGTCAA**ACTC**CTAAACGCCATTAGCGGACAT**ACCC**GCAT**ACTC**ATGGG  
**AT**GGCCAGAGCCG**GGAT**CGAACCGACGACCAA**GGAT**CTTCAGTCTCTGCTCTACCAGCTGAGCTATCT  
AGCCATACACGGGGCTATTTTAGAGAAAT**ACCC**GCTTTAAATCAATGATATTTCTTAAATGCACCTTTT



CTTTGAAACTCGTTTAAAAATTCCTCGTGAGAAAAACCCCTTTCTATAGACCGTTCCAAAAACGCATTAC  
AAGTTATAGAGGATTTAGCTATAGTTGCGCCTAGGATTC CAAGAGAGCGGGAATTC CCCAGCCAAAGGAG  
CTTGTTTATGAAAAAGCATTATTTATTACCGGCCTAGTTATTC TCTCCCTTTAGCGATTACCATTGCAGT  
CGTAGGGATGATTATGAATTTTCTTACACAACCC TTCGTTGGCATGGTATCCGATGTGTTGAAAAATTT  
AGTTTCTATACCAAATACCGAGCTTTCCTTAGACTTGGTCTACAAATTGACTTCTATTCGGACTTTTCT  
TTACCACAGTTCTCCTAGGCTTCTTGCTCGCCTTATGATTTTCAAATCTTTGTTGTCCGTGTACGACAA  
AATCC TGCACAGAATCC CAATCATCAAACAGTGTATAAGGCTGCTCAACAGGTCATGACAACAATCTTT  
GGGTCTCAATCAGGATCC TTTAAACAAGTGGTTATGGTGCCTTTCCTAATAGGGAGGTCTTATGTATTG  
GTCTGGTGGCCGGAGAAGCTCCAACCACATGCTCACAGGATGCTGACGATCC TATGATTACCGTATTTAT  
CCCAACTACTCCAAATCC TACTTCA GGGT TTTCTCACGCTATTC AAAAAATCTGACATTACTTTTTTGGAT  
ATGAAAATCGAAGACGCCTTTAAATATGTAATCTCTTGTGGAGT ATTA AACTCAGATCCCTGCGCTACCT  
CACCTTTCATAC ACCC ACAGTCTTAGTCCCCCTAATCATTATCTTCTTTTTTAAAAAGAAGGGAATTTAGT  
GGGAACCAGACTCATAGCTCTATTGAAAAAAAACGGCGCTCTACTATTC TGTTCCTTTCATAAGCAACA  
GCA GAGT TGCTATTTTCTTTTTAAATCC CTTCCC ATTCAGGAAGGCAGAAGGATCTTGTTGGGT TATTTT  
ATGACACGAATGAGT AAACAAGCTCGCCGTAGAGCTCAAAGTCCAAAAAACGCAAGCCCGTTTATGCTG  
TTCAGCATCCACAAGATGCTTCAA GAAT TGCTTTTAAGGCCACACTAACACAGCAAAAGGTGTTGGCGT  
TTTTGTTCCTCAAATGGTTAATTTATAGAGAAATAACATGTCTAGACATCGTAGTTACGGGAAGTCCGT  
CAAGGGAGAGACTAAGAGAAACGTTCTTAAGCGTTTTGAGCGCATCGAAGTGTACGTAAATTAGGACGC  
TGGGACGATGCTACTGCTAAAAAAGCCACAGGGCTTCTTAAG ACTC CTGTAATCAAGTAAGTTATATTTT  
TTTTGCTTATTTTGGATCGATCTTCTCCTCAAATTTTTATTTCTAACGAACAACAAGATGTTAGCATAGA  
TTTACAATCTGCTCAGCGTCTTGTGTTCTGTTTTGGAACTACAAAAGTTTTCTACAGATCAGGTGTAT  
GTTTTATTTTCTAGACGACACAGCTCTTGCTCAGCTCCATGACGAGCAATTTTCTG ATCC TTCCCTAACAG  
ATACCATT ACTC TTCCCATAGATAAGCCTGGAAT TGCTTCTTTCCTCATGTTTTAGGAGAAGCTTTTGT  
AAGCCCTAAAGCAGCTATGCGATTC TTGGAACAATATACCGAAGACCAATTGTATCATGAAATCTCGCGC  
TATGTCGTCCACTC CTTACTGCATATGCTAGGGT ATGATGATCAAACCGATGAAGACAAACGCATCATGC  
AAGAACAGGAAGATGT ATCC CTTTCTTTTTAGCTGAACACCAGGCGTTATTACGTCCTGCAGTATAAAA  
GTCTTCGCTTCCCTCTAGAAATCTCTATATCGATAAAAATTTTTATCGTAACATGCAAGTAAGCCTC GAG  
TCTTTTTGTGGACTC TCCCAATAAATTTCTTTTACAGGAGCTGGCTTTTTTCGCCCTCATCATGCTATATA  
TTCTGCTGGCTATTATCGTTCTTTTTCTTTTCTCGGCTCAGCA ACTC ACCGCAGAGCCTCTATTTCAGC  
ATACGGAGGAGAAGCCTTCCCCCTTCTCTTCTTGTCCTAAAGTCTTCTCTCCTTTGTTAATTTAC  
GGAATGCTTGGAGCCCCAGTCTACCAGTAC ATCC ATA AACTTCTTCTCTGTCCTCCTCAATTTTTTGGC  
TCATTTTCTATCTTTGGCTCTAGTTATTTACAAATTC TTACCC CTTTGCCAGGCT ATTC GGACG ACTC  
CTTCAGCTACAAAGTTTCTCATCTACAGTTAAAACCTTGAAAACCTGTCTTGCTGGCTTTAAAACACCT  
TCTATCACTGCTATGCAACAG ACCC CTCTCCAGAACCTCCCAATGAGCT ATCC AC GAAT ATCTCTCTGTC  
TCAATCATATGATCGCTCGAGAAATATG ACTC CCAAAGCTGACATCTTTGCTTTACAAGGAGAC ACCCC  
GATTTCTCAAGC ATTC CCTCTAATCATAGACGAAGTTATAGCCGC ATTC CTCTGTTACAAA GAGTATT  
GATGACATCACAG GAAT GGTTCCTGTAAGAAATCTGTACCTGTTACTATAA GGATCC TCATACCTCCC  
AACCTTTATCATCGATCGCTATCC TCCCTTGTACACACCAGAAATACGTAGAGCCTCTCT ACTC TTACA  
A GAAT TTCGTCAAACGTTGTACCTAGCGATTGTCGTTAAT GAAT AC GGAT TTACAGAAGGCCTTGTCT  
TCTATGGAAGATATCGTCAAGAAATCTTTGGCGAAATGCAGAT GAATACGATGACCAAGAAGATGTTCT  
ACTACAAAAAATAGGAAATGCCT GGAT TGTTAGACGGACGCATGAACATTTCCGATGCCGAA GAGT GCTT  
TGGACTC CATATAGAACATGAAAGTAGTTACGAT ACTC TTGGTGGCTATGT ATTC CATAAATTAGGTGCC  
GTACCTGAAAAAG GAAT GAAAATTTACTATGAAGATTTTGCTATAGATATCTTATCTTGCTCTGACCGTA  
GCGTAGAAAAAATGAAAATC ACTC CAAGAAGAAGAAAGCCTTTATCTTAAATACAAC TACTTCTCAATGA  
AACACTAGTAAATCAC ACTC TCTGTAGCTGTTGTCTTAAATGTATAGCCATAGTAGAAGGGAGATTACG  
AAAAGGTGCTTTTGTATCGTGATATTTTCATGCCTTTTCGTGCAATCTCTA GAAT ATAGTGCAGCCCTTCTA  
ACTACTTAATCTTAG GAGT CCT ATCC CAAT GAGT AAC TTT CAGAAAGAAGAACAAGGCCAAACAGGC ATC  
CTTCATTTACAAGGGAA ACTC GATGGTGTCTCTCTCCAGCTGTACAAGAAAGTATTTCT GAAT CTCTTT  
CCAATGGCATGAAAAACATT ATTC TGGACTGCGGAGATTTAGATTACATATCTAGTGCAGGT ATCC GCGT  
GCTTTTACAAAGCTATCACCAGTAGGGAAAAATGCGGGGAAAAATGCTCTCACTTCTGTCTCTAAAACA  
GTGGAACAG ACTC TTTATGTCACAGGCTTTTTGTCTTATTTTAAAGTCTTCCG ACTC TGT GAAT GAAGCTC  
TACAAGCTTTAGCAAAAAGAAAACAGTTA ACCC TACCTTCA ACTC GCTCTTTTTCAAGTGATGCGTAGTT  
ATCAAAGTTGTGTGGTCTGAAAAAATTTTTGGTGTAACATAGCC TTTTCTTTGAAG ATCC TCTGTAAG

CATGCGAAAGCAAAATTTTTACAGATAAAGGACTTCCTGGTTACTCGAACTTATATATTAGTTGCTATGC  
GCAGATCTGTTTGTACGTTACTCTTCAGTTGCTAGGGCTGGTCAAATTTCTACCTGGCGTTTGAATA  
TTCCTCAGCTAATTTCTTCCCAGGCACATTGCTAAAATTTGACCTGGGAATAGACGGACGCCCTATA  
GACTGGGAGATTCCTTCTATAGATCTTCTCAACCATGTAATACAATTTATTTAGAAACGCCTTCCGAGG  
ATATTGTGGCTGCAAAAGCTGTGTATGCTCCCGGAGGCTATATCCCTACTTTCGAATTTACTCTCCCTTG  
TGATGTGGAAGCTGGGGACACTTCTCTATTATTCCTGGCTCCTCTCCCAACTTCCCTCAAGAGGACTCT  
TCAGGTAATGGTGCTCAATTATTTACTCAACGCCGTAAACCTTCTCTCTTTATGTTGACCATCAGGGA  
AAGGATCTTTTGAAGATCCCGATATCTTACAATGGATATCAGAGGAAATGTATTAATAAATATCCGGAT  
TTTTGCTCCTTCTTATGTGATCAAAAACAACGCTTTGATATTACAGTGCGCTTCGAAGATGAATTTGGG  
AACTTAACCAATTTCTCCCAGAAAGACCCATATCGAGCTTTCGTACGAACATCTTCGCGAAAACCTCA  
ATTGGCAATTGTTACTCTGAAACAGGCTTTGTGATCTTCCAAACCTGTATTTCAATGAACCAGGTAT  
TTATCGTATTCAACTACGCAATCAAGCAACAAAAGAGGTCTTTACATCAGCGCCTATCAAATGTTTTGCA  
GAAACCTCCTCTCATCTTTTGTGGGGGCTTCTACATGGAATCTGAACGTGTGACTCTGAAGGTAATA  
TCGAGTCTTGCTTGCCTATTTTTCGTGATGACTGCGGTTAAACTTTTTTGCAACATCCTCTTCGAAAT  
TCAAGATGGCCTGACCCAGAAACCATTAATAACCATTAACCAAACCGTTGCTGATTTTAATGAAGAAGAT  
CGTTTCATTGCCTTATCCGGAGCACAGTACCTTTCGAAGAGCTGGCGAGGGAATTCGTGAAGTATTGC  
TGATGAAGGAACCCAAATCCCAGGGAAACATAAAATGCAAACTATTTCTTTATCTAAGCTATATAA  
GCAATCAACTAGTCATGAGTTAATCTCAATCCAGCTTCACTGCTTCAAAGAAAATTTGGATACAATTTT  
AATAATTTCCATCTGAATTTGAAAAGGTTGTTGAAATTTATAATGCCTGGGGATGCTCTGAAAAGACTG  
AAGCTGAAGGGAACCCTTTCCCTATTAAGGTTCTATCGACTCAGAAAATCCAGAGGGAAGTCTTCTATC  
TGCTTTAAAGAGAAAACCTGCGTTTTGGATTCGTAGCCGGTGGTCTTGATGATAGAAATCTATAACATCAC  
TTTTTTGATTCGATCAACAGCAATACTCCCTGGATTAACAGCTGTGATCTGCAATAAATATTCCTCGG  
ATTCCTTACTCGAGGCATTATACCAACGACAATGCTATGCTACAACCGGCCAAAATATCGTGAATTT  
CCAGATTACATCTGCTCCTATGGGCTCCGAACCTCCACAGCCATTAACCAGGGCTCGTGATCAATAGA  
CATATTTGCGGATATGTAGCAGGAACGCAAGATTGCGTCGATTGAAATCATCCGCAATGGGATATTC  
TCCATACCTTCCACCCAGATGGAATAACTTTGAGTATGAGTACGACGATCTCTCTCCTTTTGCACAAGT  
ACTCTAAAAGATCCCAAAAATGGAGCTCCTTTTGTCTTTTACTACTTACGAGTACTCAAGAGAATGGA  
GCTATGGCTTGGAGCTCTCCTATTTGGATAGATCTTAACTAAAATAAGGCCTTCATGACTTCTTTATTTT  
TACTCTGTCTGTTGCGCTACAGCCCTTCTCAGTATAGGAGTAACAGCTGTTTTGATAGGGTCTTCTCTACT  
AGGAAGACCCCTATCTAAAGGATGTGGCCGACGACTGCTGTGCAAAAAGAAGTCTTGTCCCGTGAA  
AAGCAAAACTCACAACTGATAACTACTATGACGACTTCCAGCTCGAATCCACCTAAAAGCGCATGG  
CTTAAAACCTTATTTGATGACTATTTATCTGGAGCGCTCTTCTGAAAACAAGCTTTACAATTAATTC  
TCGTTGATGCTGAGGATCAACAAGCTTTATGGAGCTTTGCTGATCTTATTCGTCCAATCGTGTGGTGA  
CACAGTTTTCTACTGTGACCCCTTATTTTATACCTACAACTTCTGTGAGTTAACTGTACGTTTTGT  
TCTTCTATGCCAAACAGGGAACCTACAGGATGGTCTTTACTCAGATCAACTGTACAATCTATAA  
AAGAAAACCTTCTCCATTACAGAAACGCATATTGTAGCAGGATGCTACCCCTCTTGTAACTTTGCTTA  
CTATGAAGAGCTCTCTCCAAAATTAAGCAAAATTTCCAGATCTACATATTAAGCGCTCTCAGCTATC  
GAGTATGATTATCTGCAAAATTAAGACAATCTCCAGTTAAAGAAGTCATGCAACGCTTGCATCGCTG  
GCCTGATTCATTCCTGGTGGGGTGTGAGATCTTAGTCGATGAAGTCCGAGAGACCTCTCGCGAGG  
CAGATTATCTTCCCAAGGATTCCTAGAGATCCATGAAACAGCGCATTCCTTAGGAATCCCTAGCAATGCT  
ACCATGCTGTGCTACCATCGAGAGACTCTGCAGATATAATGACACATATGAGTAACTGCGCGCTCTTC  
AAGACAAAACCTTCTGGCTTAAATTTATCCCTCCTCAAATTTGCGTCAGAGAATAATGCTTTAGGAAA  
GCGTCTACACAAAATGACTTCAAGACACTCGATTCCTCCTGCAACTATTATTGCAGTTGCTCGACTATTC  
CTAGACAACATCCCTAATATTAAGCTCTATGGAATATTTTAGGTTCTCGACGTTGCTCTACACTGTTAT  
CATGCGGAGCCAATGATTTGTCTTCCACTCACCAAGGAGAAAAGGTATTTTGAATGGCCTCTTCCCAAGA  
GCCTATTCGTATGGATATTGAAGGGATGTCCCATCTCATAATACAACATGGTGGTATCCCATGCTTAGTC  
AATTC CAAGACCGTTAAACATTGGTTGTGTACGCTACGTTAACGCTTTACCTTTTCTAGCGGCTTATC  
ACAAGCTCCAGGCTCTCCTTGCTTATGGATACCCCTACCAATCTGGTGCCTAAACTCTGTACAGGAA  
ATAGATTATGCGTTAACCTCTGTAGCAGCAACATTCCTTCTTCTTACACAGAGTATCTTCTTGTGGAA  
TCGCGGCTTATAAAAAATCCTAAGCGTAAACTTACATGCTACTTCGCAATTTTTTGTAAAGGAGCTCC  
TCATATAGCGGCTACTAAAGAGAGTCTTTCTTCTATTTTGTGCTGCTACGAGTCTATGCGAAAACCTATGG  
AATATTCCTGTTCCCTTCCGTTACCTTCTTCTCGGACAGCATTCCTTACACAAGCTGAACACTATGATG  
CTTTATTATTGATAGGAGATACGGCATTACGCCATCCATAATCCAGGATTC CACTTATGACCTAGC

AGCTTCTTGGTATGACCTGACTGCAAACCTTTTGTTTTTGCTGGATTCTCAGCCTTTCTTCAACTATT  
TCATTTTCAGCTTCAACAGGAGTTCTCTTCCACATTGAATTATTTTCAGAATCATAAAGAAGATATTACCA  
GCAAAGCAGCTGCATTACTAAAACCTCCAGAATCGCTTATGCAAAGAATACTATACTTTATGTGCTATGA  
GCTTTCGAAGAAGGATTTTGCAGGGTTAGAACAGTTTAGAGACTATTATGACCGACTTCCACGACAAGCC  
AAATATCCAAATCATGTTTCGATTCCTTGCCTACCTATGATAAAATCAATGGTATTCATCATTAGGC  
TTGCATATAGCTTGGAAACAATGCTTTGGTTTTCTCTCTTAGGAGAACTAACCATCTATTAGATTTATGTG  
CAGGAACAGGCCGGGTAGCCCTATCTTATGTCCAGAACTATCCFCGAGCCTCAGCAACTCTTGTGATTT  
CTCAACAAAAATGCTAGAAAACGTCCAAAACGCCACCCCTCAGCTCCATTCCTTATATTACGAGTGAC  
GTAACACACTTGGCGCTTCCGGATAACGTTTTCTGTTAGCTTCTATGGCCTATGGATTACGGAACTTAT  
CTTATCCATTAGAGGCTCTTAGGGAAGTGTATCGAGTATTACAACCTGGAGGACACTTGGGTATTC TAGA  
ACTAACACGCCAGCAACATATAACCCAGTTTACCTGCTACACAAGCTCTATCTAAATCTTGTGTTCCCT  
AGCGTCGGCCGTTTTTATTCGGGAACAGCTATGCTTATTCGTATCTGAAAGAAAAGTATCCGGGATCTCC  
CACGCGATGCCGCTCTCGAAGCAATCTTTCATGCAGCGCATTACGCCCTATCCGGAAACGCAAACTACT  
TTTTGGCACAGCAACCATTTGGATTTTAGAGAAGTAAAACCTAACAACTTAAAAGCAAGGCTTATGAAC  
GGCTCTTCTTACGTCCACGTTTTCTGAGTTTTCTTCGGTTTTGATTTCTCTTCTTCGTGCTCGTACTCCTC  
GTTGAAGAAATCCCCAGTCTCTCCATCGCTATCGTAACCAAGCTTAGCGGATAATTCCTCGAAAAGAATCA  
AAACGCTCAGAAAACCTAGCTAAATTCAACTGGTCTTCCAGACGCCCTCCTCCTCGCAAGTGTGCGAGGA  
ATTCCTTCTGTATCAAATTTTTTCAGAAAAAGTAAGCGAAGAAGGAGATGTTATCTCTGGTAAAAATAG  
AAAACGTGCTGCCGAGAAGGGACTTTTTGTATAGATATCGTTTCGATATGGTTCGCTCAGCTTCAACCTTT  
GCCGACTGTTTTAGGAGTCCGCCCTTTTTTGGACGAGGGTTTAAAGCCTCGTTCAATAGTATACTTTAG  
ATTTGTTTTAAAAGAAGCTGACGCGCCTGTGTTAACTCTTTTCGATACCTTGGCATCGAATAGATGTACCTT  
CAGTTGTTCTAAAATGTGCTTAGAGAAATCAAGGCTTCTTCAAAGACAACTGAACTGATTATTACGA  
AGCCACTCAATGATGCGAATACGAGAACGCTCAACATAAAACTGTTGCCACTTCTCCTGCTCAGTCTCAT  
GGTCATATAAAAACCTCAGAAACTGCTCTCGCGCATTCCTAGACTGCACTATCTCTAAAATTTTTCTTT  
AGTATCGATATCGTAAATTTTTTTCGTTTACGAAAGTTTCCATGATCTTCTTAATTTTCGTAGAAGTCAAT  
TTTTGAATCAAGCAATACCGATCCGCATTTTTCTTCCAATTCCTGATAAATCTTATCTAGATCTTCTGAT  
CTTTATCAAGATCTATGTACAAGATAAACCCCTTCTACCCGATCTAAATAGAAATCTCTCTCGTCATCAGA  
CTTCGAGAAGGCGTCCATCAGGCGTAGAACGCGTAATAAAAGAGGATTTTGAGGTACAGGATATGTGCTC  
ATAGGCTCCAGTATAGGGATGCTCTGTTAGATAGCAACTCTCTTGTGTTATCCCAATTTTTATCCAA  
AACGCTTTGATTTAGGCTCTAACCCACCCAAAGTTCTCACTACGATTCATAGGCTCACAGGACCCCTCTAA  
AAATACCTTGCCTTTCTCAGAAAAAATCTTAATCAGATTTCTACTACGAGAACACCCGCTATAGAGAAA  
TCTTGTCTTAGAGAAAAGATATCCGCTGCAACCAAAGCACTTGCCAACATCCCTGTCCCAAGATAAGG  
TTTTCTCGCTCACAACCTCGCTCATAAGTATAGACAAGCAGCAGATCATCCCTTCTTCCGCTGAACAAAATC  
TACATTTACACCTTACAGGAGCAAAATCTTCATGATAACGCAAGAAAAGACCCCTTCTTGTACGGGAACC  
TTACTTAAATCAGAAACGAAAACCACGACATGCGGAACCCCTGTATCAATAAAAAAATACTTGTTCGGCA  
TACCAGGCAACACATGCGTTAATTTCCGCTCAGCTTTTTTCCAATCAGGTAATGTCATATCAACCAATAC  
CCGATTCATAGAAAAGAACTTACCTTGGTAAACACCAGTTCTGTTTCAATAGAAACATCTTCAAGTCCA  
AAGCACTGGGCTACGTGCGCCATTGCGCACCGCAACCCATTCCTCGCACATAGACGCGATAGATCCATCAC  
TATTA AAAACAGT GAGT TTAGCATCTGCTATTT CAGAAG ACTCTACACATAAAA ACCCATCAACCATCTC  
TTCTTGGCATAAAAACAGAACATCC TCAAGAGAAGGCATCGATTC TCCAAAATGAAACTGTTTCTCTGCT  
CCA GAATATAAAAAGATATCTACAAGTCGTTAAAAGAGAAGAGAATCC CATCTAACAGTCCAAACTCATT  
GCTTCATTTGC ACTCATCCACATATCTCGATCGATAGCTTTCTCTATCACCTCTGGAGATTGTCCAGTTG  
CCTCGACATACACATCAATAATGCGTGCTTTTTGTTTTTAAAATTTACGAGCAT GAATATCC AAGTCCGT  
GGCTTGACCAGTAATGGTTCCCTCCAATAGAAGGCTGGT GAATCATAATGCGCGCATGAGGCGTAGCAAAA  
CGTCTTCTTGGAAACAGCACAAA ACTCAATACAGATCCCATAGATGCTGCTAAACCTGTAACAACTGTAG  
TCAAAGGAGAAGAGATCATTTTAAATTTGGTCCCAAACAGCAA ACCAGCATCAACAG ACCCTCCAGGGCT  
ATTAATGACAAATACAATTTGGCTGCCA GGAT TGGT GAGT TCCAAATACCAAAGCTTTTTGATGGCTTCT  
GCAGCACTTTTCTCCGTTACAGGTTCCGAGAAGAAAATACGACGA GAATCC AACAACTTTCTATCTATGA  
CATCTTGCAACTTATGCATCATTTCCCTTACAGGCATA GAGTCTCCACTAAACTAGCGTTTCCAGATCG  
ATTTCA GGATAAAGAGG GAATCTTCC TAATAAATCAGCCACACGTTGTCTCGCTTCTGAGCG ATCCCTT  
CTGACAGCTCTCCCTCACTTTTACTAGAACCCTCTCAGCATTGCTTCTCACAGTAATATTTGCAATAC  
TTTTACGATAAT ATTCGCAACTTCTTCCATTTCCGGCACTGCC ATCCCTAGCGTTGTGAGAGCTG GAGTC  
CCTAATC GAATACCAGAAGTCTTCCACTGCCAGAGGCATCTGAAG GAATAGTATTACGATTTACTGCGA

TACCTACTGAGGTAAACATATCTTCTGCAATACGTCCAGGGACTCCTAGAGAAGTTAGATCAATAATCAA  
CATGTGATTATCTGTCCCGCCAGTGAGTAATCGTAGCCCGTTCCGCTGGAACACTTCAGCCAAAGTCTGT  
GCATTCCTTACCACCTTTATGCGCATACTTCTGAAATTGATCGTCATAGCTTCTTTCAGAGCAATAGCTT  
TAGCAGCTATAACATGAGGAAGTGGGCCGCCATCATTAGAGGACAAGCCTTGTTCAAGGTATTTGCATA  
TTCCTTTTTTAGCTAGAACCAATCCACCTCTTGGCCCTCGCAAAGTCTTATGCGTCGTCGTTGTCACGATA  
TCTGCATAAGGCATAGGATTTTTCTTCTCCTACAAACACACCTCCAGCAACCAAGCCTGCGAAATGAGCCA  
TATCCACCATAAAAAACAGCGCCACAGTCTTCTGCAATTTGCTTCAAGGTGGCAAAGTTGAATCGTCTAGA  
ATAAGACGAATACCCGCGATCAGAACGGTGGGCTTATGTTCTTTCGCTATTTTTGCTATCTCATCATAA  
TCAAATAATTCAGTATCTAAATTCACCTCATAAGGGAGACAATGCATTAATTTAGACATGATATTCATGC  
GCACAGTCCCATGTGTCAGATGCCCTCCA GAATTTAAAGAGGGGCCTAGGCATTTGTGCTGAGCCATCTC  
AGCTTTTAATGCTTCGTATTCCTGCTCAGGCAGATCATTGATCGTTTTATATCCCAACTGTTGAACCGCA  
GGGCTCTGGATCTTCTGTGTAATGATCGACATGATCGCTAATAAAATTCGCATCGGCTCCAGAATGAGGCT  
GAACAAAAGCACTTTCGACCAAAATAATTCTTTTGCCGTCTCTGCGCATTC CATTCAATTGCATCCAC  
ATTCCTGCAACAGGAATAAAATCGTTTGAATGGGCTCCCTTACAATACTTGTCTGTAAGTAAATTC CCC  
ATAGCAAGTTGCACAGATAGAGAAGAAAAGTTTTCTGAAGCAATCATTTTTAAACGAGATCGCTGACTCT  
TTAATTC TTGTACAATGCTCTGTCTTATAGATGGAAAAGCGTGTAAACAGATGATCTAATGATGCTAAATA  
GGCCACTGATGCCAAATTTTTGCTGACTTTTTGTGCGAAATATTTCTCAGATATCTATCCAATAACGATGCC  
ATATTTCCACCTCCACTGATTAACCTTGCAAGACCTTGACAGAGGC ACTCCTTATCC TCTACCCACTCTC  
TCTTATCC TTTATGGGAATCTAATCTTTTTGATGAGAAAGTCTAAACTTTCTAGGAGAAAGAGGATTTATT  
TTAACTATAACTACAAGAAAAGAAAACGATGCTTCCAAGACCATTACCAAGCGCCCCATTTTTTCCTAGTC  
GCTTACCATAAGGTGCTTTAATACCATCGCAGCTTCAGTTGATCATATTC TTACAGCAAAGTCAAGAAG  
CTTCCCTACTAGAAAAAAGCTTCTCTTCTATTTAAAAAAA ACTCTAACATGAAACCTTTTTACACAAGAGA  
TCTCCCTCATCGATCATGCCTCTGTACTTAGGCCTCAATCCATCC TCTGCTAAACAATATTC TGCTGTTT  
TTCAGCCTATTATTCGCATAGTCCCTTTTTTCAAACACGTTCCCTCAAATACGACATGCTAGGAAGTTCCT  
TGTATCAGCTTCCCATATTTTTGTTAACAAGCCCTCTTCTACCGCTTGTTTTTTTTTCTTCCATTAGGAAA  
AGAATCCCTTTATCCCTGTTTCAGGAATAAATCC TCTGTTACCATAGGAGAAGCCTCTTCTTCTCGTGTA  
AGGCCTTTCTCCCAAGCCAATATTTGTGCAAAGCGCATTCCTCAAGCAGAAGCATTTCTTCCC ATCC  
ATCGACTCTTCCCTCCAGCTCCTCCCTACTCTATCC TCACTCTGTACTCGCTCGTCCCATTC TCCGCTCT  
CTTCTACAAACACTCCCTTCTCCTCCTTTTTCTATCC TCAATTACACAGTTAAACCCATTACACTTTCGG  
TAAGTACCTTTCTTCCCATAAAACTATTATTC TCACTAGCCCTTCTATCGTTCTGTCCTATGCACA  
ACTATTTCCCTGCCTCCCTGATAAAGAACACTGGTGTCTAGGAGAGATTAGTGCAGCA GAATTC AAACAGATA  
TTTACACTCTCCTTCCAAAATTC TTTTTTCAACTAAAGAACCGACA GGATGTTGATAACAATCTTTCT  
ATTTATTTAATGAAGATCTCTTCAAGAAGTTGTGAAGAGATCTACCTCTTTTAGAGGGCATATAATTC  
CTGTCCCCTTTGCAAGCACATGACCGAAATCCCTTCTCTTTTTGTTCTTCCAGATCC GAATGGATATAT  
CGTGTAGGTATTGGTCAGGACAGTCAACGTTTTCTCCCTGACGAAGATCCCAAGCCCTGCATATTAGGTG  
GCATATTTTTGAAAATACTCAGGATTCGAAGCTAATTCGGATGGAGATGTTGTCTTCCATGCTATATG  
TAATGCGTTTTCTGTCTGTAACGCACAAAGGTATTTGGGAGGACTGGCTGACGAGCTTTTGA AAAACAAA  
GGCATTACCGATAGCGTAGTCTATCTACAAGAAGCTGTGCGCTCTTAAAACCTACACAAC GAGTCTCGC  
ATCTAGCTATTACTATAGAAGGGAAGCGTCTAAACTGCTCCCTCAGTTACC GAGTATGCGCAAGAGAAT  
AGCCGAGGTTCTTACATTCCTCTAGATTCATTAAACATTACAGCCACTTCTGGAGAAGGCTTAAC TGCC  
ATGGGACAAGGATATGGTGTTCATGCTTTTTGCGTTTTAACTATTATGGAATATTGTGCGGTATTAGTATA  
CGTCTGAAACTAGTCTTCTGTGCAATCAGCTCTCGTACCGCTTAGGACCTAATATCTGCTCTAAAGC  
ACGTTTAACTTCCGTACCAAGGATTTTTTTCCACAAACAAAAAAGAAAGCTTCTTGTTGCTAGACTTCT  
TGTATAAGTTCTTTTTGTTGCTCTATAACATTC TGAACATACAATTTAGACTCGGAATCTCTGGAAAAGG  
CTGTGAATAACTG GAGTTTTTCTGAAACGATCAGCTCCTGGAGAAAATCCCGGTAATAGAAGTTACTTTT  
CTCAAACGCTCTCCAAA GAATAGAATATTGGAGCCTACGTCTGATGGTATATTCGATGTTGTAAGAAC  
CCTTTGTACGGAGCGATACCTGTCCC TGCTCCGATCATAATTAAGGTTTCCCAAATTTTTCTGCTCCA  
AAGTAAAATGCCGCGTCGGTTGTATAAACCCACGAAAAGACTCTCCCTCTTGTAAGTCTTACATAAAAA  
AGCCGAACATAATCCATAGCGCAGCTGCGTTTTACCTTGGAAC TAACACAGCGCACGAGCAACTCTAGC  
TTCCCATGAGAACATGTTGGAGAAGAAGCTATA GAATAAAATCGAGGCAATAAAGGCATCGC ACTCCGAA  
TAAACTCTTCAAAGGAATACGCGGCTGGTAAACCAAATAGCTTACGCTAAAAGACCAGGTATCGTCTAA  
ATCCCTGGGAAAAAAGGTCTTAACGATTTTTGGAATTTTATCTAAGTCTACGTAAC TAGTAAGAAAATTCG  
TGAAGAGGGAGAACA GAATCTGCATGCCGAGATACGACAGGAGACCTGGGGCCATACTGTAAGCATCCA

GAACTGAATCGACTAATGTGGAAAGGATTTGTTGGGAATACCCCAAAGAATCCCAACTTTATAGGAAAT  
CTCAGAACGAACC GGATTACATAAAATCTGAAAAACAGGATCCGAACAAGTATTC CCAATATCCGATGTG  
GAAGAACAAGCTCACGTGAATGTAAAAACATCCACTGAGCTTTGAATTTAGAAAATAAAGACATTTTTTA  
AATCAAAA GAATTAGGCAGCCTTGATCTTAATATCTACTCCAGCAGGCAAAGACAACATTTTTCAAAGCAT  
CAATCGTCTTTCTGTAGGATCTAAAATATCAATTAATCGTTTGTGAGTACGAATTTCAAACCTGCTCAG  
AGATTTTTTATCTACGTGAGGAGATCGCAACACCGTATACACTTCTCTCTTTGTTGGTAAAGGAAT TGGA  
CCAACAACACGAGCTCCAGTTCTTTTAGCAGTCTCAACAATATTTGCTGTAGACTGATC GAGT TGCCTT  
GGTCAAACCTTTCAAGC GAATCCGAATTC TTTGTTTTTGCTGCTTCATATATTC CTTACTTCTTAACAA  
TCTCTTCTTGAATTTTCTGAGGAACTTTAGCAAA GAATGCAGGTTCATAGTCGACGTAGCTCGACCAGA  
AGTTAATGATCGCAATGAGGTTCATATATCCAAACATTTTCGCTCAAAGGAACTTCTGCGCTGACCTGCGCC  
ATGTTTCTGGAAGATTCCTGACCTAAAATCTTACCTCTACGACGATTC AAGTCTCCAATCACATCTCCAA  
GATGATCTTCTGGAGTAATAACCGTTACTTTTATAATAGGCTCTAAGATCACAGGAAGAGCTTTTTCTACA  
AGCTTCTTTTACAGCCATCGATCCGCAATCTTAAAGGCCATCTACTAGAGTCTACCTCGTGATAGGAT  
CCGAACACAATGCTTACCTTGACATCGACTAATCCATATCCAGCCAGC ACTCCGGAATTTAATCCCTCTT  
CGACCCCTTTAATTACAGCTGGGATGTACTCTTTAGGAATTACCCCTCCGACGATCTTACTGACAACCTC  
GTTTCCTTTTCCAGGTTCAATTTGGCTCAATTTCCAAGCAAACGTGAGCATATTGTCTCGACCACCAGAC  
TGCTTAACGTATTTTCGTTTCACTGTTACTTGTTTTTGTGATCGTCTCTTTGTAAGAAACCTGTGGCTTAC  
CAACGTTAGCTTCAACTCTGAACTCTCGGATCATACTGATCACGGA GAATATCTAGGTGCAATTCACCCAT  
TCAGAAATAATCGTCTGTCTCTTTCTTCAATTAGTAGAAACTCGGAAAGTTGGATCTTCTCAGAGAGA  
GCACTCAAAGCCTGAGCTAACTTCTCTCTATCCCTTTAGACTTAGGCTCAATTGCCATATCAATCACAG  
GTTCTGGAGCTTCAATACGTTCTAGCACAATCTCTTGGTTCTCATCGCAAAGAGATATCCCTGTTACTGA  
GAATTTTAGCCCTACACACGCACCAATGTCTCCGACAGTAAACTCTGCCCTATCGGTTGCTCGTTAGCA  
TGCATTTCCAGAAGTCTTGAGATTCGCTCTTTCTTATCTTTGGTC GAGTTAAGAATGGCAGAACCCTTCT  
TCAAAGTTCCAGAGTAATAACGGATAAAAGTAATACGTCCAACATAAGGGTCCGTCATGATTTTTGAATGC  
TAAAGCAGCCAAAGACCGTCTTTTGAAGGCTTCAAGGAGACTTCTTCTCCAGTTTTCAAATTAATCCCA  
CGAACATTC CCACGATCAAGAGGAGAAGGCAACCCTTCAACAATAACATCAAGAAGCTGTTGAACACCTT  
TATTTTTGAAAGCACTTCCGCAAAGAACTGGATGATTTTTACCC TCAATCACTCTTTTACGCATTACAGT  
ATGGATTTCTTCTTCTGTGATAGAATCTGGATTC TCCAGCACTTCTCCATAAAGGCTTCGTTGCTTTCA  
TCAACGGTAGCTAGTTCTTCTAATAATGCAATTC TCACTGTTGCGCACTGCTCTTGCAAATCTTCAAGAA  
TCTTGGCTCTTCCATTTAGCTCTTAGAGTCTCTTCAAGGAAATACAGAGCTTTTTGAGAGATCAAATC  
TACCATTC CCACAAATTTGGCTCTCAGAACCAGATTGGACAATGAACAGGAATAGCGTTAGCTCCAGCTTT  
TCTCTCATGGACTCGACAGCGCCAAAGTAATTCGCGCCATACGGTCCATTTTTATTACAAAAGCAATCC  
GAGGCACTCATACTTATTCGCCTGTCTCCAAACAGTTTCCGATGAGGCTCGACTCAGAAACAGCATC  
GAAAACGGCAACAGCACCATCGAGAACTCGCAATGAACGCTCTACTTCAATAGTAAAGTCAACGTGCCCA  
GGAGTATCAATAATATTAATCTTTGCACCCAGCCAGAAAACGGTCTAGCAGCAGAGGTAATGGTAATTC  
CTCTTCTTGTCTCTGTTCCATCCAGTCCATGGTTGCTCCACCTTCGTGGACCTCACCGATCTTATGAGT  
TCTTCCCGCTAGAAAA GAATGCGCTCTGTTGTTGTTGTTTTACCTGCATCGATATGCGCCATGATACCG  
ATATTTCTAATCGGTCTAAACCGAACTCTTGATCGTCTCATCGAATTTTTTTGCCCTCACACACGAATG  
TTAAACGTTATCTTACCCTTATAATGAGCAAATGCTTTATTTGCTTCAGCCATGCGATGGGTGTCCTCG  
CGTTCTTAATCGTAGCCCTTGTATTGAAGCAATCGATCAACTCATTAGCAAGACCGACTTCCATAC  
ATTTCCCTGGCTTAGAACGAGCATGCTTGATAATCCATTGCATAGCAAGACAGCTTCTTCTATCAGGAGC  
CACTTCAACAGGAAC TTGGTAAGTAGCACCACCAACTCTGCGAGAACGCACTTCAA GAATAGGCTTCGCA  
TTC TCCAAAGCTTCTTGAATCC TCTAAAGGATTC TCTAAGCCTAATCTTTTAGCAAACGCTCTAAAG  
CACCGTAAACAATCTTTCTAGCGATGCTCTTCTTCCCGTGCAACATTACTTTGTTAATAAATCTTTCTAA  
GACTACGCTCCCGTAAACAGGATCGCCTGGAATGACCTTCTTCTCAGCCGATGTCGTCTTGACATATAA  
ACTCAACCTCTTCTGATTTCTTTTCTTTAGGTTAGGGAACCAGCCTACTTAGGACGCTTTGCGCCGTAG  
CGAGAACGGCTCTGTTTCTATTTTTTACGGCAGCACAATCTAAAGCACCTCGGACGATGTGATAACGCA  
CCC CCGGCAAATCC TTA ACTCTTCCGCCTTGACC AAAACGATGCTGTGCTCCTGCAAATTATGACCTTC  
TCCACCGATGTAGGCAATCACCTCTTGTCCATTAGACAAACGAACCC AAGCAACCTTACGCAAAGCTGAG  
TTAGGTTTCTTCGGAGT TTTAGTTTTTACCTGAAGACAGACCCCTCTTTTCTGAGGAGACTTTTTGTAAG  
CTGGAGATTTCTTTCTAGTTGCGCCAGACTGACGCTTCTTACGTATTAACTGATTAATCGTCCGCATGTA  
CTCTTCTCGATTC AACCTCTTTACAAACAGGAAAATATA GAATAA GAATATCTTTGTTTGCAAGGGTT  
ATTTCTAGGTCTAGTAA GAGT TTTATCGATCTCTATAACAATTTTTATTAAAAACATTTCTCTAAAAGAT

TTTCTTAAAACAAGCCTTCCCTAAAAATAATTAATAAAAAAAGAGTTAAATCCTTGCTGATAAAATGTTT  
TCTTCGAATACTGTAGTTCAAAAACCTGAAAACAAGACTTGTATCATGAAAGTTGTTGTGAATCCACT  
CAAGAATATTCACAAATTTCAACTCCGGTATTGCCGAAAATCAACGTGTTACGTTTTTTTCGAAATACCG  
CAATGCTAACCTGCAGCCTTTTGTTCACGCTGTGTTCCGGCAGTCTGTTTATTATTGGTCTTTTTCCCTCA  
AACCCTATTCCCTTTGCTGGAGCATTTTTTGTTCATCGGGATGTTTCTAGCCTTTTCAGCACTCTGCATC  
TTTTCTATGGCTCTTATCTATAATGTGAAGAACTGGCTATCTCACAGACCTATTCCTCTTCCACTATTTT  
CCAATATAAATTTTCTTGTTCACAAAAGAAAATAACCCCTCCGTTACCTTTCTTTCTGAGAAAAAAAGT  
TTTTTTTCAGAGCGAGTAGGTAACAACCAAGTACTTGGGTTTTTATACAACAAAATACCGACTCAAGTTT  
GCGAAACTCCTGTGCAAGATACGAATAATCACGATTAATAGAGATATTCGTAATGATGAGATTCGCTCGC  
TTTTGTCTGCTAGTTTTTAACCCCTATTTCCACAACCTTGCCTTTTCAGCAGAGCCTCTTCGACGACAAGATG  
TCCGCAAAACCGTAGATAAACTAGTCGAACATCATATTGATACGCAACAGATCTCTCCTTACATTCCTCTC  
TCGATCTTTGGAAGATTATGTTGTTCTTTTTGATTCACAAAAGCGTACCTTACTCAAGACGAGGTCTTC  
TCCCACGCTTTTTTCAGAAGAAGCAACACATCCCTATTTAAGCAATATCAAGAAGATAACTTTTTCTTCTT  
TCAAGGAATTAGATACCTGTATCCAACAAAGTATTTCTCGAGCCAGAGAATGGCGCTCATCCCTGGCTCAC  
TGATTCATACGAGTAATTCAGATGCCATGTCTCATACTATTGAGAAAAAACCAAGCGCTTGGGCTTCT  
TCAATTGAAGAAGTAAAGCAAAGACAATACGATCTTCTTCTTCTTCTTCTTCTTCTTCTTCTTCTTCTTCT  
CAGCAAAAAATCGTTATCAAGGGAAAAGAACATGGTTTAGTTAAACTCTGTATCCGCCAGATTGAAAACCA  
TGAAAATCCCTTATATCGGCATTAACGATCATGGATACAGAATGTCTCCGGAGGAAGAGGCCAATAGCTTC  
CATGTTTCGTATTATCAAATCTATTGCTCATAGCCTAGATGCGCATACCGCCTACTTTAGTCAGGAAGAAG  
CTCTATCCATGAGAGCTCAGCTGGAGAAAGGCATGTGTGGCATAGGAGTCGTGCTTAAAGAAGATATTGA  
TGGGGTTGTGGTTAAAGAAGTCTTGTGCTGGAGGCCCTGCTGATAAAACGGGTAGCCTTCGTGTAGGTGAT  
ATTATTTACCGTGTAAATGGGAAAAATATTGAAAACACCCCTTTCCCTGGGGTTTAGATTCTTAAGAG  
GTTCTCCAGGATCCCTCCGTTACTTTAGATATCCACAGACAAAATAATGATCACGTCATTCAGTTACGTCG  
TGAAAAAATTCCTTAGATAGTCGTCTGTGCGACGTGTCTTACGAGCCGTACGGTAATGGCATTATCGGT  
AAGATCACCTTGCCTCTTCTATGAAGGAGAAAACCAAGTATCGAGCGAACAAAGATCTACGTAAAGCCA  
TTCGAGAATTACAAGAAAAAACCTGCTTGGCTTAGTTCTTGGATATTCGAGAGAATACGGGAGGATTTTT  
ATCTCAAGCCATCAAAGTGTCTGGGTATTTTTTAACGAATGGGGTTGTGGTTGTCTCCCGCTATGCAGAT  
GGTTCGGTAAAACGCTACCGCACTATTTCTCCTCAAAAATTTTATGATGGGCCGCTAGCTGTTTTGGTTT  
CTAAAAGTTCCGCTTCGGCAGCAGAAATGTTGCACAAACACTCCAGGATTACGGAGTAGCCCTGATCGT  
GGGAGATCAACAACTTATGAAAAGGAACCATCCAACATCAGACTATCACTGGAAGCAACAGTCAAGAA  
GATTTCTTTAAAGTGACAGTGGGAGATATTACTCTCCTTCGGGAAAATCCACACACTCGAAGGAGTGA  
AATCAGACATTGTTATCCCTCACGTTATGCAGAAGATAAACTCGGAGAACGCTTTTTAGAGTATGCTCT  
ACCAGCTGATCAATACGACAATGTGATCAATGACAACCTGGGAGACCTAGATATCAACATCCGTCTTGG  
TTTTCAAAAATACTATTCCTCACATTTACAAAACCCAGAACTGGTTTGGAGAGAAAATGCTTCTCAGCTTG  
CTCACAATAGCCAAGAACGCTTTGAAAAAACAAAACTTTGAGATTTTTGTCCAACACTTGAAAAAAAC  
AAACAAACAGGATCGATCGTTTGGAGCAACGATCTGCAAAATGGAAGAAAGTGTGAACATCGTTAAGGAT  
ATGATCCCTTCTAAAATCTATATCACAACTCCAGCTCAATAAAAATCTGGGAGGAGGACTCTTCTCCTC  
CCTTCCATACATCATCTGTGAGCAGATCATCCATAAAAACCTGCGCTATCATCTTTTGCCTATAGAGCA  
ATCTCTTATCATTGGGTCTGATCCACCAGACTATTTCTTCTAGATAGAGATAACCACTACCCATCTATGG  
CATTCAACCTCTCATCAGTAAACACTTTATTAAGAGTTGTTTATCTGCCATCATCGATGATATCTTCTGA  
AGCCTTTAATATCTTCTTACATAAGCTCCATCTCTCCGGAGAACAGTATCCCTCCATGGATAAAATTCCT  
ACGCAGATATTCACGCATCCACAATAGCAGGAATAGCTAGATAGATGGGATTTACAACGAAGCTGCCG  
AAACTAGGAATATCGTAGCCATCACTAAAAGTAGTCCATCACCACATAATCCCACCTTAAATGCAGTGA  
AGATAGAAGATTCGATATACGCCCTTTCAGTGTAAATGGTGCAGAACTAGTGGAAATATCCCTGTGCCGAA  
TTGGAAGATCCAGCTCCTTGAACAACGGGTACAGTGTCTCATATTTTACATTCCTTTTTTGGTTGTGAGCA  
GGGAGTCTACACAAACACTTATTTTTTTTCAAAAACCCATCTAGAATATGCTCTGAGAACGAAAATGAACT  
CTTTTATTTTTCATATAGATAACAAAAAAGCCGCCAGGAATCCCTGGACGGCACCTACACATCGATAAA  
ATCAAAGATTAATAGATGTGTGTATTCCTCTGTATCAGAACTGGAACAGTCAATGTATCGGAAGAAA  
TTCGCTTCCCCACGAGCATCTCCAGCTGATACTGCTTCAATGTTACAGAAACTCTACAGTTTCTTTAGA  
ACCTAATCTAGGTAACGAATCGAATACTACTGTATTGCCTGTAATCGTTCCTTTAGTTGGTCCAGAGAAG  
GATACAGGTTGCAGTTCTTTAGAGAATTTAAGCATTAAGAAAACATTTGTATCTTCTGCAGAACCCTCTGT  
TGGTGACACAAATACGGTAAACAGTATTTTCTCCTACACAAAACAGGGTCAAGTATCTACTACGCACAT  
ATGAGTAGCAGCAACTCCTTCCAGTAAGTTGTGCTTCTGCGCAAGAAGTACAAGTACCACAGTCAGAG

CAGCTCTTCACAACAACATTATTTGTGAATTGTCCAGGAGTTTGTGCTCTTACTAGAACTTTATACTGTA  
GAGACTCTCCAGGATTCAGTTCTTTCACAGTCCAACTACTTTATTACAAGAAATTTGAGCTCCTGCAGC  
TTCAAGAACTGTGACTCCGGGAGAAAAGAGTGTCTTAAACGACGACATCTCGCAACACAAGATCTCCAGGA  
TTGGAAACGGAGATCACATATTCACAGGCTTACAAACATAAGACCAATCTGCTCCTGCAATACTTACTT  
GTACGCAAGGCTCGTTGATCACAGTTGTTACGCTTGCTGTATTTTTATGTCCTCCACAGTAAGAAACCAT  
TGCTATATTGGTAGCACGACCACGTTTAAAGCGGACAAAACTCTACAGTAATTGTTCTGTGCTCTCCAGGT  
TGCATATCTCCAAAGTAAACGTCAGTACACGCTGTCCAGAAAGATGAGCGTAACTATCCGGAACAAGAT  
TTTTCAACAACAACGTTACGAGCTGTTGCTGTTCTTGGTTCACTACATTAATTTTGTAAACTACTGGGCA  
ACGCAAACAAGCATTCCTCTGGGCCCTTCTGTTTAAACACAGATAGCAGGTTGTCCACATTTTGTAAACGGAA  
CGGATCTCTGGACAAGCGCATACTGTTGCAGCTGTAAAGCAGCAACCTTCTTTAAGAGGTTTTACCATA  
CAGTAATTTTACTCTTTTCGCTTGTCTTAAAGCGGTCAATTTTCCAACTAGCTTACCATCAGCAGTAGG  
AGTTGTCGCTGGATCACTGCGTACGAACTCTGCTTACATGGTAATTGCTGAGTAATGATAACATCAACA  
CAATCCCTTTTACCTGTAGCAGTAATTTCAACAAGATAGGGAGATCCATCCGTAGCATATTTAGGAACAG  
CTTGTGTGATTTCAACATTACGATCATTAACCTTTGACTGTATACATTCGCAAGCAAGAAATCCGTG  
TTTAGTCTCTGTAGCTTTAGACTCATGAACCGGAGCAACCTTTTACGGTTTACGGGAGTCTCTTTGCTG  
TGGTTTTTTCTTGTCTTTTTGCTTTTTATGAGAAGTGTGTCTTTTCGCTTTGGTGTGAGCTAAGCTAATAA  
CGTTTGTAGAGATAAACTCTGCCATAGAGGTCTCTAACACCCCGCTAGCAAATAAACTCGCCACACTAGT  
CACCGCAAGATCGTCACTGCTCGTCTGATGAGTTGTTTCATAGGATCTCCTATTCGCATAGATTATTTT  
TTGTCTGCCATCGGGTAGAAATTGTTATTAATACTAACTTTTTACCCCTAACATTTTCTTGTAGCCGAAATA  
GTTAGTAAGGAAGCCAACCTTCTTACTAATACTACATCTGTTGTGGTAGGCTCTTAACTTGCCTACCTAT  
TGCTGCAATTTGCCGTCAACTGGAATTTCTCTAGCTTGAGGGCCATGTTTCCAGCATCTTGGTGCCTATCC  
CTCCGCAAGGTTTGAAGCTGGGACATACCCGTTACAGAGTTGCAACCACCGTCTACGCTTTCTTTCTT  
AGATTCACAAGGTGAACATTGGATAGGTGCGCATGGATCTTGAAGCAACAGTCAACGATACGACAACAA  
CTACTTAAAGAAACAACACTACATAAAGCAGCGAGTAAAGCAGTTTTTTTTTATAACTTCCAGACTCTTT  
CTAGAAAAGGGCTCTTGAAGTTCTTTTTATCGATAAAAGCAATTCCTTTAATAATAAAAGAACTAGCCC  
TCATAGACAATATTACATTATAAAAATAAAAATTATATCAATTTGTTTTTTAAACAAATCGTCTAATAACA  
GGTAATTAGCAAATCAAAGCAAACAAAATAAAAATAAATAAACAGCTCGGATTCAAAGAGATAAGTTTGCCT  
ACAAACAAAACAACTTTCGATAGAATAAATAAACTAAAATCTATCTAACTATAGATAACAAC  
AGACTAATAATAATAACAAGAAATCGGAGGGATGAAAAATGAAAAGATTTTTCTTTTTATTGTAGCTA  
CTGCTGCCCTCCTGACACAAGGGTGTCTCTATGAACCCCGAAAAGGGAGTACATCTTAGCCAGAAAGTG  
CTCCCTCTTTTCAAACACGCCGAACTTATGATTTCTCTCTAGCTCAAGCAGTATTTGAAATGACCTTC  
TTTACCAAAGCACCACCTGTGTATCAAGTCTTGAAGAAATGTCTCAAATTAGAAGTCTAAAAATCTAA  
TGTCTTCAAGAGGCTGATCCGCAATGCTTTGTGCTGACTTGCTGCTGCACTTTCTTGGATACTCTCCCAA  
TAGATTTTGGAGCATAGGTCAGCCGTGCTCGCTCCTAGCCTTACCTAGTAATTCATCGAATCAAAAAGA  
GGAAGTCCCTGTTTGCACCAGTAATAGCCACATATAGCAGAGGGATACAGCCTTCTTATGATGCACTT  
GAAAAGCCTCTGCTAACCATTTAGATCCTTGATAGAAGAAATCTTCTCCATAGATCCCTTCTCTCTAA  
ATACTTCACTAGGCTATAACAACATGACTGCAGCCTGCTCTTGTCTAAGCGAGGATGGTAATAACTCTCT  
TTACTATATTGAGGAATCGCAGTGAAAAGAAGCTGGTTAACCCAACGAAATCGGCTAACGTAGTAATAC  
GTGATTGACAGAGAGGAAGAAATTTCAATAAAAACTCTGTCATTCAGAGCCACCCCTTCAATTCCTGTAA  
GAGACTCTCTGGAGATCCCTTCGTGGTTAAGATAGTGTGTTGTTATCCAGTCTAACCTACGGATATCGAAA  
ACGGCTCCGGATCTTCCAATTCGTTTAGGATCAAACGCTTCTATCAAACGCTGCATGGAATAATCTCTT  
CATCCCTTCCATACTATACCCATTAGGGTCAGGAAATTCATGAACGCTTCTTTTTTGTATCCAGCATC  
CCGATAGTAAAAAATAGAAGTAGGATTCCTTCTCTTGGAAAGCTTACTTCCATCAGGATTTAGAAGAAGC  
GGCATATGAAAAACTGCGGAGGCTCCCACCCAAAAGCTTTGTAAAGAAGAAGGTGTTTAGGTGTAGAAC  
TTAACCACTCTTCCCTCGCAACACATGGGTAATCCCATCAAATGATCATCAACTACATTAGCAAAGTG  
ATACGTAGGGAACCGTCTGATTTAACCAAACTTGATCGTCAACATCTGCCCAAGGAAAACGACACGA  
CCTTTGCATTGATCTTCAAAAACACTTCTCCCGTCAAAGGCACTTTCAAACGAATGGTATAAGGCTGTC  
CTTGCTTCTCTTTGTGCAACTTCTCTGGAGATAGGTAACGATACCGGCGATCGTATCCCTCCTCTGTAA  
CCCAGAGTACTGGCAACCGCCGCAATTTCTGCAATTCCTTGTAGGAGTACAAAACACTTGTACGCACAA  
TCTGTTTGTAAAGAGGATCTCTGCGTATTTTTTGTAAATCTCTGTGCGTTCCGGACTGCCGATAAGGGCCAT  
AAGCTCCTCCAACATCTGGACCTTCGTCCCAACGAATTCGCGACCCTTGGGGCGGAGAAAATATTTGC  
TTCATAATCGTCCCGACTCCGAGTTGATCCGTATCTTCAATCCCTCAAATCATTTGCCCATTTATTTTT  
CTTGCAAAAACCTCATTAACAGAGCCATATAAGCAGTCCCACATGAGGATCTCCTGTAGGAGAAGGGG



CTACTCTAACGCGTACATTTTGGACAGTCATTCGCTACTAACCAGGAAAGGAACTTTTCTTCTTTATG  
AAATGAACACCCCGTCCC GGGTTCCTGTCCTATGAATCAGGCATAAAATCGGACCGTTCAAAGCCCTACG  
TTCTTAAACGATACCAGAGAGATTCATTC TTGGCGACTTTAACAAAATAAAATAACGAGT TTTTCGGAG  
CTCTTTTTCAACAAAAAAGAGCCCCCTCCGGAATTC CGGAGGAGGCCAAGCTCTCCCCTGCTGTGCC  
CTTACAGAGAAGGCTCTATCTCTATGAGATAAAATTTTCTGCGTCTGCCAGCAAATCTGCGCCAAAGCC  
TCAAAACCTTCTCTCATGGCTGCAAGACTTTTCCCTTTGCGCTCAGCTTCCTTCTTCAGATAATCGTTTC  
GATATCTGTCTACTTCCGAAACGTGAATGACCC AAGCAGATCC CCGACGCTCTCCTTTCATAGCACC  
GCGTGTAGCATAGTAAATCTTCTGTTCAGGAACATCCAGCATGGACGCCACTTGTCCCACGGAATAAAAG  
CCTTCTCGTTATCAAACAGAAGCTCTCCTTGATAAGTGGATTTAGCTCGTGAATAACGATTACGTCTGT  
AATCC TCTAGATCTTGCAAATCTATTTCCCAACGAGTAGTCTTCGATGCTTTTAATTTCTTCTGT  
AGCAACATAGATAGCCTGACGAGT CACATTATGCAACTTGGCAGCCTGAGTAATCGATACTCTTTGCGAA  
GTAACAGGAACAGCATTCCTTTCTTGCTGCTGAACTTGAACCTGTTCTGCTTCGACCCCTGTATCTTGT  
GTAAGCATTC CATACTGACTGTTTAGTCTCTCTCGTCCACTTAAAAACAAATCTTGGCCTGTCTTGT  
TAATGGCTCTGTGACCTTCTAACC CGTCTCTTAGAGCTATGCTTATTGAATCTCTAAGTCGGACAAGCC  
CTTTCCACTCTATTCATAACTTTCTCTTCCCTAGTTTAGCGAGCGCTTACTGAAAAATTGCAAAATCC TTA  
AAAAGAGAAGGTAATATTTTCCCAACAAAAACTTATTAATCAAGTGGTTTGTAAAAATAAATGCTATT  
TTTGAAACAAAGTTTTGTAAAGTTTTTTACAATAGGAGAGATTTTGTCTCTCCTCTACTCTGAGATGAC  
TAGAGA GGAT AATACAGACTTCTAAAAACCCAAATCGAAACCACTAAACAAATTCGGGGTTAAGGATTTAC  
AACCGAGGAATCTGTATACGAAAATCC TGAATCAACAAACGAATGCTCCGCGAGCCGACCGCCTCATAA  
TACGTAACGTATAGCGGATATCCAAAGGTATATTC CAATTCGCTTTGAGTAGACTAATCTTATCC CCTG  
ACCGAAAGCCGTCCTTCCAAGTTCTCTCCCCTACTTTCAAATACAATTTGACATGGTTCCCGCTAAT  
AACTTTGGATAACGTACCTGTATGGCTTTTGTATAGAAGACTGGGGATACATTCCTTTTCCAAAAGGCT  
CAAGAAGCTCCATAGAAGCAATTAATCCCGATTGATGCGAGAGAAATCCATCCCAACATCTAAGGAAAG  
CGTACGCATTGCATCATCTTTTCTCAAAGAAGA ACTC ACTAGATGAATAAATTTTTCTGAATCCCTCG  
ACCTGATCTTCTTTGATCATAAGCCC GGCAGCGAAATCATGCCCGCCATACGATAGAAAAAGGATTCGC  
ATTTACGAAGA ACTCCTAATAAAGGGAAAGATCC TATAGTACGTAAAGATCCCTTTCCTATCCCATCTTG  
GAGAGCAATAAATTGCTACTGGCTTGTATAGGTACGCGCTAAACGAGCAGAAATAATGGGGAT TACTCTA  
GAGT GCCAATTAGGAGAAGCTAATAACAATAGCTGATTGAGCTGTAAGCTTAGGATTCGCAGCTAGAATCC  
TTTCCACATCGCGCAGTACCTCGGCTTCTATTCGCTGACGCTCTTGATTTACAGCAGAAAGCTCTGAGAC  
GATCGTTCCAATATTTTTAGGATCTTGAGACAAAAGTAACTTTAC ACCCTGACTTGAATCTGCCAACCTC  
CCTAAACTATTGAGTTTTTGGAGTAATTC TAATTCCTAGATTGGTGCAGGATACTCAGACTTATCAACCC  
CTGATAATGAACACAGCTTTTTTAAGCCTAATCGTTTTTCTTTTGTATTTCTTAAATTC CATAAGAAAC  
TAAGATACGATTCCTCCTGAAAGCCTCCCTACATCTGCAATCGTCCCAAACTTACCAATCTAAAAAA  
CGAAAAGGTCTATTTTGTCTTTCCAAGAAGCATCC TGCTGGATCAATTCCTCATAGGTTGCGCATAACCA  
ATTTAAACGCGACTCCTACTCCTGTAAGCTCTTTATTTGGATAAGGATTTTTATCTAATTTAGGATTTAG  
CATTGCAATGCAATGCGGAAGCTTCCCTGTAGGCATATGGTGATCCGTAACGATCACGTCTATACCC TGT  
TTATTGATAGCCTGAACCTCTTTCCCTGCTGTGATACCGCAATCCACAGTAATTAAGAGAAATACCAT  
CTGCAGCATTTGAGAAATTAAGAAGCTGTCTCTCCATGTTGTTAAACAATGTCCCGGAACAGCAATA  
ACTTGTTTTACTC CAAGTATTTGTAGAAATTC AACGATCAAGGTCACGCCTGTTATACCGTCTACATCC  
CCATCTCCATAGATCATCACGTGCTCATTATTTGCTTTAGCTTGGAGTAACCGTGCTACAGCTTTCTCCA  
TATCTAAGAACAAAGAGGTGGAGTGCAATGAGGAGAGCTGGGGATACAGAAAATCTCGAATCTCTTGGAT  
AGACTGAAATCC CCGAGATATGAGCACTTGAGCAATCGCAGGATGAAGATGAAACTCTTTTAAAGATCTTC  
TTTAGAAAGACCTCATTATGCTTA GGGTAATCCCATTTTTGTCCAAGGGAGGATAAATACCTTTTCCA  
TATACCTACCGGAGGAAA ACTCCTGTTAAAAAAGCTCCCTCTTCTTTAGGAGGAAAGGAGCCCCATA  
ATCATCC CACAATTTTAGGATCACATACGCCAAGCGTATTTTCATCATTTACCGTAGAGAATTTTGTCT  
TCCTTACGCACCATGAATAAGAGAAGCGGAGGAGCTATGTACAATGAAGATAGCGTTCCCTAACAGATCC  
CCACTGTCTAATGAATGCAAAATGAAAATAGAACCCTCCCCAACGAATAACAAAATGACCAGTACAGA  
TAGAGTTGTTGCCGTAGTCATAACTGTACGTCTAATGTCTTCTGCAATGCATCATTGATCAAAATCGGC  
ATTGGGGTGAACAGTTTTTTCGCGCCGATCTTCTCGAATACGATCAAAAATAATCAACGTATTGTTCAAAG  
AGTACCC TAGCACTGTCTAATGCGCCTATTGCTTGC AAATCAATCTGTATTCCTGCAAAAAGAAATG  
TAAGGCAACTAGCACAGCACAAGTCGCTAATAAGTCGTGCATTAAGCACAAATCGCACTGAAGGCATAT  
CTCCACTCAAAGCGCAAGCTAACATAAAGTAAGATAATTCCTAAAGCTCCAAATAATGCGATGACAGCCT  
GTGTACGCATTTTATTGAAAGCTGTCCACTTACTTAAACCAGCTACCTCGAGAAGCATCAAAATACCAT

AGAAGTAGTAGAACTTCCGGAATCAGACAATACTTGAAGAAGCTCGAGCAAGATGATAATCCGATCCTTTC  
TGTTCTGATCCAGCTCCTTCTATTTGCTCAACTCTATCCAAGGCATTCCTGAGATAAATATATTTTGACTT  
TTCCAGAACTATCTGCTCTACGCACACGATAATCTCGAGAAGATAATCCGATTTGTTGGAAACGCTTTCT  
CAATACAGAACACATCTGCTCTGGATGTACTCACACACATCGGAATCTAAAGTCAGTGCATATCCACCT  
TTAAAATCCATCCCAAAAACGGAATCCCAAGACCAAACCTAATCCCTACACAACCTAAAACAAGAAGCTA  
CTCCAGAACTACCCACAACGTTTACATTCCTTTAAGAAGTTATGCTTGAATCCCAATAAACTTATTCAT  
CATATGCAATTGGGTCTCTCTCGTTTTCTGCACCCAAATGACAAAAGAAAATTTTCGTCATAAACAGGGCT  
GTGAACATGGATGAGAAAATCCCGATGATCAAAGTGAGCGGAAACCTTTGATAGGTCCTGTATCTAACA  
TCAGCAGCAATGCTGAAGCTAAAATAGTAGTTAAATTAAGAGTCAAAAATGGCACTGAATGCCTTTTTATA  
ACCTGCTTCTACAGACTCCGACAAGCTTCTAGTCAAAGATATTCCTCTCGGATTCCTTCAAAGACTAGA  
ACATTAGCATCAACAGCCATTCATTTGCTAGGATTAATACCAGCTAACCCGGATAGAGTAAGTGGAGCAT  
CCAAAATATTGCATGGAAGCCCAATGAGCAATAGATTCAGCAGCACCGCTATAGAAGCAATAACACCTCC  
AAATCTGTAGTACACACTCATTAGTACGATGAGCACTACAAGTCCCAACACAACAGAGA GAATTCCTTGT  
ACACGCTGAGAAGTTCCCAACTCAGGAGAGACCACTTCTTCACTTAAAATTTCTGGATGAAGGACATAG  
CTCCAGATTTAAGATCTGTAGCTAAACGATGTAATCTCTGTATGAGAAGTTTCCAGAAACACTAGCATG  
ATCTTTTCAGTGGAAACATTC AACACG GGATCGCTGATCACGTAGCCATCTAATACGACAGCCATACGCCAC  
CCCTCTCCCTCCAGAGAAAAGGCCATTTTTTGTACCACCTAACCCCTTCTTGGCAAAAACCTTGATGTCCAAG  
CATGAAATTGTTGCACAGGCGTTTCTCTACCGTCCGAAAAGTGGCTTTATCCCTTAACCCCAAAAATTTAA  
AACATATCCCTCTCTACTGCAAATTCGGACGGATATTTTTAAGAGAAGCTCCTTCTAAGGCATGATTT  
CTAAATACAATCATGAGAGGATTAACCTGCTCTCTAGACTCTTTTTCAATAGCAATCATTGAATACTGTG  
TATCTAAAGAAGCAGAACCCTTCTAGCTCTTTAGAAAAGCTCAATCCAGCTTCTCTTAACTTCTCGAC  
TGCTACACGAACATTAGCTGGAGCTGAGCCATTATCCCATGGAAAAGAGCTCCCGCTAAACGATTGATA  
GCTTGAGGAGAACATTCGTCCAGACTACGTGCTGTAAACCAAAGGTAATCTAAAAACGTTTGTACTTCGT  
AACGTAGAGGGCTTCTTGAGGAAAATGCTCATTCACTACATGGAAAGACATTTTGGAAAGTCCCTAAAAT  
GTCTGCAGAAGAAATACCTGCTGCTCCAGGAACGCTCACCTGTATATGATCACCTTCCCTTTCATCCCT  
ACTTCGGATACCCCTAGTTTTGTTCAAACGGGCATATAACTCATCAGAAACTTTATCAATCCCGCTTTAT  
CGGTTAATAAGTTCCCTTGGTGATCTCGGAAAGCAATCCGAATCTGTTTCCCTCTACAAAATCCGTGCC  
AAACCGCAAAACATGCTCGCCTCGA GAATATTTCTGATATTC AATTTCAAATTC TCAAAGAAAACATTC  
TTATGTGGAATGTCAGCTCGTAACCGAACCTGTGGATTCATAGAACATTGCGCTTGTGATACTGCTCAT  
CCCAACGAAGTACTCGGCATGCTGAGTCTTCTCAATACGATTTACTACAGCTAACCGGTCACGCACATC  
ACGGACTTCAAGAGATGCCTTCCCAAAACTTTGAACAAACTCTTCTCCCAAATTCGAATGACACGTTGC  
AAAGGCTCTTTAATCTCTAGAACACGATCCCTCTCCCAAACTCCACGAAACTGCATCCGTATGAATAAAC  
ATGCATATAAATTTGTAGATCATGTTGTAAGAGAGCAGCTTCTTACAGCACCGGCATGTTTACTTCTGC  
TACAATCGAACGTAGACCTTTAAATACAATGTAACAGAACCTTTAGAAAATGCCGACAGCTTCGCTCC  
GGCGAGAAAATAAAGCATCCTAAGGCATCGCTATCCAAAGGCTCCCTACCATAACAGGGAAATTTTCTG  
TGGATAAATCACAAGTTTCCGCAAGAGGACGATTC AAGACTAGTGCAGTCAAATGTTCCACTATTCGCTG  
ACAAACTCTGTGCCCCGCAAAAACAATTTTACCGCTAGCCGCTCATCTCTAATCGGACAGCAAAACCA  
AATTCGCTCTTCAACAGAACGATTC AAGCGAGT AGCTATGTGCTGTTTCTCCATAGCAAACAGACGCT  
CTAAATCTAAACGCTCATTACCAACTAAGTGTGACGATTAGCAGCTACTTCCGCGTCGAAATGGAATAA  
CAACTTCCCATCGGCAGTCAAGGACATTGAGGAAAAACAAGGAGA GAGTTCACTACAATCAACAACATTC  
CCTACGACTTTAGGGCTAATCGAATTC CAACGTAAATTACGA GAATGTAAAAGATAAGAAGCATCTTTAA  
GCTCCTCTCGAGCTTCCCTCACTTCCCTCATGTTGTAAAGCTTTTTCCAACCTTGCCAAAAGGCTGTAAA  
ATCGCGCTCCGTCCCAAGCACCGAGATAGAAAACCTT GAGTCTTCTTGTAGGGAGCAATCGCAAGCCA  
GAACAAATGTTCCGTGTGACATGGATAACCTTTCAATAGGCATA GAATCCCATAAA GAATAGTATCCGC  
ACTCACAAAGGCGTCTGACTCGATAAATAAGTTTGTGCGAGATTTTCTAATTC TTGCGAAACCGTAAC  
ATCTTTATCTTACATACGAGACAAAAGAAAGATCTTCTCTGTCAAAGAAGTCACTAAACTTCCGGAATTT  
TGAACAACGTCTCTCCAGTGA ACTCAGAGCTCCCTACAACATACAATCGTGCAGACTTGACAGGAACAG  
AAGGCTCGCCGTGCACTACATTATCAATAAATAGTGCAGCGCTTCTGCTAAAGGAAAATGTACATTCAC  
AACTCCAGGAATACTTGGATGCTGCTTTATATCCCGCGTAATTTTAACTGGATAAAATTTTCGCAACA  
CGCAGCGTCAAATCATTCGTCATCCGAAACTTGTGCGGTGAAACGCTCTATAATCTTGGGAGCCTCTC  
GTCCATCTATTTTTCTATTC AAAGGTCGTGAATAGTATAGACATGTAGGTAACACATGATACAAAGCCAA  
AGCAAAAACAAGGAATAAATGCTGAGATTTGCTTAAAATTACGCTTCAATATGAGGCTCTTCGTTATT  
CGTGAATTCGCGAATGCAGCTACTTAGCCCAACGCTCAAGCAACGGGAAGGATCTAGGCTCTTCAA

AACATATATGTTGACAAAAGAAAGCCCTCTCAATGACAAGAGAAGGAGCCCGGAGTCTCCCCATTTTT  
GACGTCAGAGACAAATTTGGATGGAATCTTTCTGCAATTTTTGGACAACACGGTAGCTTTCAATGC  
TTGTCTACCAAACCAACCGAAAACCTCGCCCGGCGACTCGACCAGGAAAGCGTCCCTGGACCACACC  
CTTTGTTACGTCAAAAAAATTGTAGCTCAGTATGTTTTTTGTAACGTTTATAATCAAAGGTAAATCACGAG  
TAACTGAAGACTTCTAAAAAATCAACAGCAAACGTCTTCTCAAACTGCTTACTGAATAGGCGCTTCAG  
AAGAAGCTTCAAAAAGAAAGAGCCATACGAACACGCATATTAGCTATCTGGTGATACGCCCAATAAAGCAA  
CAATGAGCCCAAAATTACTAAGCCTAGTCCTGGTAAAACGTAAACACGTACAGAAAGCAAGAAGCCTA  
CAGCCCAAAACAGAAATCCCTAGCAAAACGATCAATGAAGGCACTATTCGTTGCACCCAATTCATTGACT  
GTACACGATCCAAGGAAGTGAACCTCTTTTTCTTGACTTAGACGTTTGTGAAGATGCCCAACAGCTGT  
AGGCAAACATAAACTCCTTCTGGTAATTTTCATGTCTTATTTCTTGCTCATCACCGCAAAAAAAGCCGC  
TATTTCTGTCTAACTAACCAATCTATCATGCCGAATAATCCGGACTTACTTGAAAGCTTCGAAAGCAAAA  
ATAGAGATCTAAGGTATTTGCTCTTAATGAATAACAAGAGCGTTCGTCCATTTTACCAAATAAGCTGCT  
AAACCGCAACCATCAAAACAAAACCTCAAAATATAAAAAATTTTTATTTTGCTGATGCTTAAAAATAGATTT  
TAGAAGAACTGGTTTCTACATTCAGAGGAGACTTGATAATAATCATTATCTATGGGTACCATCCCTGCTC  
TGAGTCTAAGAAACCCTCTACCAAGAGTCGCCACCTCTTCTACTAGCGATATGGGGATGGTTTCTTAGAA  
AAAGGGGGATATGGATCCCTATAATTCCTCAGAGAACAGCCAAATCTCCAGCCACTATAGAATATCAGACT  
GCGTATGTCTCTAGCTTTAGAACAGGCGACCTAATTCAGAAAATCTTCCGCAAGGGAATTCCTCCCT  
AGACATATCGCCATCATCATGGATGGGAATCGTCGTTGGCAAAGAAAACATGAACAATTTTGTGAGAAAC  
GTGCTATATCTGGCCACCGTCAGGGAGCTGATAGCATTCACAAAATGTTGACACGGCTTTACACCTAGG  
GGTAGAGGCTCTTACGCTATTTGCTTCTCTACAGAAAATTTCTCTAGATCGAAAATCGGAAGTCGAGAA  
TTATTTTCTTTATTCACCTCGCAGTTGCGCAGCAAGCTCTCTTTCTTACATGATCGGGAGATCCGATTAC  
GGTGTATTGGCGACTTATCGAAACTTCTCAAGAAATACAAAACAACATTGAGCAAGCCTCTCCGCGAC  
AGCTCATTACTCCGCATGGAGTTAATTTTTGCGATTAATTACGGAAGTAAAGACGAACCTGTTGCGCA  
TTCAAAAGATTACATCAGGATCTTGCAAGTAAAAAATCTCGGTCAACGACATTTCTGAAGAGCTTATCA  
GCTCCTACTTAGACACTTCTGGCCTTCTGACCCAGATTTGCTTATTCGTACGGGAGGTGAAATGCGTGT  
CAGTAATTTTCTCTTATGGCAAATAGCCTATACAGAACTTTATGTAACAGACGTGTTATGGCCTGATTT  
ACAGCCAATGACTTGTAGAACGATTAAAAACATACCAACAACGATCACGGCGCGAGGTAAATAAACGC  
TATGTTGAGATTCGGATCATAATTCATTTTTCAAGCGATTTGTGTCAGCGTCTGGTCTCCACTCGATT  
CTTCTTACTTTCTTGTCTATTCCTCTGTACATCTTTATATCCAGCTCAGCCTTTATTGTAGGGCTTC  
TTTCTCCGCTTGGCAGCTCTAGGAACATATGAGATGGGGGCTATGGTTAGAATCAAGTTTCCATTTTC  
TTTACACGCTATAGTGCATTAGGATCCGCTATTTTCATTGCTCTGACCTGTCTTACAGCTCGTTGTAAA  
ATGTATTTTCCAGACATATAGACCTACTTCTTGGTCTTTCTCTTCTTTTGGACATTCGCTTAGTAT  
TTAAAAGTCGCCATTATAAACTTGGTCCCATAGGCTCAACTGGGCTCGCGTGTGTTTGTATGCTTTATGT  
ATCACTCCCTATCCGCTTGTTCCTCCACATTTTGTATGGTGTGCATACCGATCTCCATTGTAGGA  
ATTTGGTGGGCGATTTTCTTATCGCTACAACAAAAGCTCTGATATTTTGGTACTTCTTTGAAAAG  
CTTTGGGAAAAAACGCATTGCACCAGTCATTAGCCCGAACAAAACAGTAGTAGGCTTCATTGCTGGTTG  
CTGTGGATCTATCTTGGTTAGCCTTCTTTCTACTCCATCTTCTAAAGCCTTTGCTGATCAGATTGCG  
GTGCTCGGATCTCGTTGCTTTAGGTACTGTGTTGGGCGTGTAGTGGATCTTTGGAGACATTATCGAAT  
CTACGTTCAAACGGGATGCACAGATTAAGAACAGCAGTGATCTGGAGTCTATCGGAGGAATGCTAGATGT  
GCTAGACTCCTTGTCTTTCTGACTCTATCGTTTACGCTATCCCTCTATCACTCAAAATAGGACATTT  
TTAGGATGATCATCACTATAGATGGGCCGTGAGAACAGGAAAAAGTACGCTAGCAAAAGCTTTGGCTCA  
AACGCTGCAGTTTCTTTACTGCAACACAGGTGCCATGTATCGAACGCTTGCCCTACGCTCGCCTCCAGCCT  
GATTGGCAAGAAGTCCATTAGAAGATTTCTTGTCTCACCTCCTTTTCTTTCTCTTTCTAAAGATT  
CTCCTTTACAAGCTTTCTATGGAGATCGCCTTCTCACTTCCGAGTTAAGCTCTCAAGAAGTAGCGAATTT  
TGCATCGCTCTTCTTAAGGAGCCTCTAGTTCGAGCCTACATGCAAACCTTACAAAAGCAATACGCGACA  
GTAGGGAATTTGTGATTTGAAGGCCGCGATATGGGCTCGAAAGTGTTCCTCCATGCTGAAGTAAAAATCT  
TCTTAACAGCTAAACCAGAGATTCGTGCAGAACGACGCCTAAAAGACCTCCCTCAAGGTTCTTGCCTAA  
AGAGGCTTTAATGGCAGAACTCATTGCTCGTGACCAAGCAGATCAACAAGAGAGTGGCATCTCTTGTG  
ATCCCTCAAGATGCCATAGTTATTGACTCTTCTGATTTGACAATAAGCCAAATTCGGAGAAAATCCCTAC  
CTTTGATACCTCCCATTTAACATGATTTTACTATCGCCAAAAGCCTTGTTCGCTTACTGTTCCCTCTG  
TTTTACAGAAGAAAAATCCCTGAGGTCGAAAGCAAGCGCTACCGTGAAAGGAGCCGCTATTATTGCAGCGA  
ATCATGTTTCTTTCTTGACCCCATCATAATCCCTTTAGCTTTCCAGGGAAATTTGATCAGCTAGCTAA  
GTCCGGACTGTTTTCTAATTCATTCCTAACAGGCTTTTCCGTGAATTAGGATGCTACCAATTAGCAGA

AACGCTGGAAATGCTGCGGCCTTTAAAGCTGCTCTAAATATCTTTTCCCATGGAGGGAGGCTCATCATTT  
ACCCCGAAGGAACCCGTCATGCCGACGGAGAAATTCATCAAGGCAAAGTAGGCGTGGGTATGCTGGCTAT  
CAAAGGCAATGTCCCTGTTATTCCTGTTTACGTGGCAGGAACTTTCGAAGCCTTCGGCAAGAACCAAAAA  
TTTCTAAGCTTTGGAGAACTTTGACTACTGTAATAGGCTCGCTATTTCAATTCACAGACCTCATAGATA  
ACCCGCTATTGATAAAAAAGAGGCTTACCAATTAGCAACTGACCGCATTATGACCAAGATCACCGAACT  
TCGTACTTGGTTCCAACAAAGGATGCATTGGAGAAAATCCCTAGTTTTATAGATTCATTATGACAACACTTC  
TTTTTTTTCTGACTTCGCTATGTTCTGCAGCGATTCATCAAGCCTTCCCTGAGTTGGAAGAGCTAACCTT  
AGACATCACTCCCTCTACTAAGGAGCATTTTGGACATTATCAATGTAACGATGCAATGAAACTTGCACGT  
GTATTACGCAAATCCCTCGTGCCATTGCCGAATCGATCGTTGCGCATATTCCTCCCGCTCCTTTTTCTT  
CTATAGAGATTGCAGGAGCTGGATTTATCAATTTTACTTTCTCAAAA GAATTCCTAGCTAGTCAGCTCCA  
AACCTTCTCAAAA GAATTAGCAAATGGGTTCGTGCTGCGTCTCTCAAAAAGTTATTATTGATTTTTCT  
TCTCCTAATATTGCTAAAGATATGCATGTAGGCCATCTGCGCTCCACGATTATCGGAGATTGTTTAGCAC  
GATGCTTTTTCTTTGTCGGCCATGACGTCTTACGCTTAAACCATATTGGAGATTGGGTACAGCTTTTTGG  
TATGCTAATCACCTATCTGCAAGAGACCTCTCAGGAGGCGATTCATCAACTAGAAGATCTCACTGCATTA  
TATAAAAAAGCTCACGCGCTTTTCGAGAAGACTCTGAATTTAAAAAACGCTCCCAACATAACGTTGTAG  
CCTTACAATCCGGAGATGCTCAAGCTTTGCACTATGGAAACAAATCTGTTCCGTTTCTGAGAAAATCCTT  
TCAGACAATCTACTCGATTTTTGGATGTTGAGCTCCATACACGCGGCGAATCATTTTTATAATCCTTTTCTA  
GCAGAGGTTGTGCGAGACTTAGAATCTAAAAACCTTGTACGCTTTCTGATGGCGCAAATGCGTATTC  
ATGAAGCCTTCTCTATTCCTCTCATGATTCAAAA GAGTGATGGCGGATACAATTACGCAACAACCGATGT  
CGCAGCTATGCGCTATCGCATCCAACAGATCAGCCGATAGAATTCATTATCGTTACAGACTCAGGACAA  
TCCTTACACTTCCAGCTTCTAGAAGCAACGTGCTTAGCAGCAGGCTATCTTCTTCTAAAGGGATCTTTT  
CACATGTAGGATTCGGACTTGTCTTGGATACTCAAGGAAGAAAATTCAAAACACGTTTCGGGAGAGAACAT  
CAAATTACGAGAACCTCTCGATACAGCAGTGGAAAAAGCGAAAAGAGTCTCTAAAAGCACATCGTCCAGAC  
ATCTCAGAAGAAGAACTGGCATATCAAGGCCCTATCCTTGGTATTAATGCAATTAATATGCAGACCTTT  
CTTCTCATA GAATCAATGACTACGTGTTCTCTTTTCGAGAAGATGCTCCGCTTCGAAGGAAATACAGCGAT  
GTCTCTCCTGTATGCCATGTACGTATCCAAGGAATTAAACGCA GAATGGGATTA GAATCTCTGCCTCAA  
GAAGGGCCTCTTGCTATTCATGAGCCTGCAGAAGAAGCGTTAGCACTTACTCTTTTACGTTTCCCTGAAA  
TTTTGGACCTCACCCTCAGAGA ACTCTGTCCTCATTTCCCTAACTGACTATCTCTATGC ACTCACCAATAA  
GTTCAATACTTTCTTCCGCGATTGCCATATCGAAGGATCCGATTCCTAGCAAGAACGTCTTTATCTCTGC  
GGACTTACCGAACGAACGCTATCAACAGGTATGCACTTACTAGGCTTTAAAACCTTGAATCACCTGTAAC  
ATATGAATATTTAAGGGAAGCTCTTCGAGTCTTCCCTTAAACATACACAGATACTGCGTCTCGCGCTAAA  
ACCTTAGCTCCTAATCTTTCTAATTTCCCTCGCCAATCAGTGTACCCTCGATCCAGCATCTCGGTATTC  
CAATCCATGAGGCTCCGCTTCTGCAATGAGTCCGCGCATGACATAAGCAAATCCGCGCGCAAATCAGG  
AATCACTAAGTCTGTGCTGCAAAGGAGTCCGACCATGAATGACTGCGCTATGAGGATGATTCCTGT  
GAATAGCGACACGACTTAGCACTCAAACACTCTGTAAATAAATCACAATGCGCTCCATTTTTTACCAAC  
CTTTCAAATACCCAGACGATTCATGCACTGTCTCATGGATCACCGAACACCTTCTGACTGAGAGAG  
CAATACGGCAAAAGGTTGTTGCCAATCTGTAATAAACCCCTGGATGCACATCCGTTTCTAGAAGAACACCC  
CCTTCAAAGGCTTATCGTAGAAAAATTCGATCCATTCCTCATGTACAGAGAATCCCCCTCCTATCGATC  
TTAATACCTTTAAAAAAGGGATCATATGCTCATGGCGCGCTTGTCTACGAAGATCCCTCCCTGAGAAAC  
TCCGACATCCAAAAATTTGATGGTCTTATCATATCTGTTGTAATCTCCACGCCTGCTTTCTGTAAAA  
AGACAATCAAATCAATGATTTCCACTTCAAGAGCAGCATTCCTAATAATCGTTCGTCCTTGAGCCCCTAC  
AGAAGCAAAGGATGAGGTTTTCTGTGGCTCCCACAGAAAGGTAGGGTAACGTGATGTGTGCTCCAACAAGA  
CCATTTGGAGCTGAAGCCCAATAGCCTTTCATCACTAATTAATCTCTGCTCCAAGCTTCTTCAATCCTT  
CTAAATGGAAATGTAGCGTACGAGGTCCTATAGCATCCCTCCCAAAATAGGAACAAAAATCCCATAGG  
ACAACGACGTAACAACGCTCCTAACAGCAAAATAGGAATCCGATTAACACAAGAAAATTGCGGAGGAACC  
TTGGACAATAAAATGCGCGGAGTGTGAATTTCAATCACTTGCCTGTGATCCACTCTACAATCGCCC  
CTAAAACCCGACAAAAGATCTACCGTTTGGCCGAACATCTTCAATATTAGGGACGTTCTTTAAAATCGTTG  
CTGATCCGAAAGTAAGGAGGCTACAAGTAATTTAGTTGTAGCATTTTTTAGCTCCTGACACGCGCACAGAT  
CTCTTAAGACCGTTTCTCCAAAAACCTTGATACCAGGCATTTTCAAGTTTCTTATGCAATTTCTTACA  
AACGTTACCCGGTATGCTGTTATTTTTTACGAAAACCTTTATTTTTTCAAAAAAACATCTTATTAACAAA  
GAGACATTTGTTTGTTTTTAAAAAACAAACAAAAATAAATTTGTAGCAATAATAAAAACAACTTTTTTA  
AAATCTAATTAATCGGCTGTTGTTTTTATTTAATTTGTAGTTATGACGAATTCATATCAGGTGATCAA

CCTACTGTTACAAC TTTTACATCATCAACCACTTCGGCATCAGGTGCTTCCGGATCTCTGGGAGCTTCTT  
CTGTATCTACTACCGCAAACGCTACAGTTACACAAACAGCAAACGCAACAAATTCAGCGGCTACATCTTC  
TATCCAAACGACTGGAGAGACTGTAGTAACTATACGAATTCAGCCTCCGCCCCACTGTAAGTGTATCG  
ACCTCCTCTTCTCCACACAAGCCACAGCCACTTCGAATAAAACTTCCCAAGCCGTTGCTGGAAAAATCA  
CTTCTCCAGATACTTCAGAAAGCTCAGAACTAGCTCTACCTCATCAAGCGATCATATCCCTAGCGATTA  
CGAGCCGATAAGCACTACTGAAAATATTTATGAGAATATTTATGAGAGTATTGATGACTCTAGCACAAGT  
GGCCAGAAAATACGAGTGGTGGTGCAGCAGCACTCAATTCCTAAGAGGCTCCTCCTACAGCAATTATG  
ACGATGCTGCTGCTGATTACGAGCCGATAAGCACTACTGAAAATATTTATGAGAGTATTGATGACTCTAG  
CACAAGTGACCCAGAAAATACGAGTGGTGGTGCAGCAGCACTCAATTCCTAAGAGGCTCCTCCTACAGC  
AATTATGACGATGCTGCTGCTGATTACGAGCCGATAAGCACTACTGAAAATATTTATGAGAATATTTATG  
AGAGTATTGATGACTCTAGCACAAGTGGCCAGAAAATACGAGTGGTGGTGCAGCAGCACTCAATTCCT  
AAGAGGCTCCTCCTACAGCAATTATGACGATGCTGCTGCTGATTACGAGCCGATAAGCACTACTGAAAAT  
ATTTATGAGAGTATTGATGACTCTAGCACAAGTACCCAGAAAATACGAGTGGTGGTGCAGCAGCAGCAC  
TCAATTCCTAAGAGGCTCCTCCTACAGCAATTATGACGATGCTGCTGCTGATTACGAGCCGATAAGCAC  
TACTGAAAATATTTATGAGAGTATTGATGACTCTAGCACAAGTACCCAGAAAATACGAGTGGTGGTGC  
GCAGCACTCAATTCCTAAGAGGCTCCTCCTACAGCAATTATGACGATGCTGCTGCTGATTACGAGCCGA  
TAAGCACTACTGAAAATATTTATGAGAATATTTATGAGAGTATTGATGGCTCTAGCACAAGTACCCAGA  
AAATACGAGTGGTGGTGCAGCAGCAGCACTCAATTCCTAAGAGGCTCCTCCTACACAACAGGGCCTCGT  
AACGAGGGTGTATTCGGCCCTGGACCGGAAGGACTACCAGACATGCTCTTCTTCATACGATCC TACAA  
ATAAAACCTCGTTATTGACTTTCTCTCCAACCCTCATGTAAAGTCGAAAATGCTTGAAAACCTCGGGCA  
TTTTCGTTTCATTGATACAGATAGAAGTAGTTTCAATTCCTGTTCTAAGGAAATGGGACCAAGTCTGT  
TCAATTAAAGTTCAAAATGGAAAGACCAAAGAAGATCTCGACATCAAAGACTTGAAAACATGTGTGCAA  
AATTCGTACAGGGTTTAAACAAATTCCTGTTGACTGGGACAGTCGTGTAGAACC TATGATGTCAGCCAA  
AGCTGGAGTGGCCAGCGGAGCAATCTTCCCAATACAGTGATTATCAATAATAAATTCAAAACCTTGCCT  
GCTTATGGTCTTGGAATAGCCGGAAGCAAGTTCTGGTTATACACCTTCTGCTTGGAGACGTGGTCATC  
AAGTAAATTTTGGAGAAATTTTGGAGAAAGCCAACGACTTTAATAAAATCAACTGGGGAACCTAAGCCGG  
GCCTAGTAGCGAAGACGATGGCATTTCCTTCTCCAATGAACTCTGAGGCTGGTCTGCAGCTGCTCCA  
TCACCAACGCCATCCCTCTATTCCTGTCATCAATGTCAATGTCAACGTTGGCGGAAC TAAATGTGAATATTA  
GAGATACGAATGTCAACACGACTAACACCACACCAACAACCTCAATCTACAGACGCCTCTACAGATAAAG  
CGATATCGATAACATAAATACCAACAACCAAACTGATGATATCAATACGACAGACAAAGACTCTGACGGA  
GCTGGTGGAGTCAATGGCGATATATCCGAAACAGAATCCCTCTTCTGGAGATGATTCAGGAAGTGTCTCT  
CCTCAGAATCAGACAAGAATGCCTCTGTGCGAAATGACGGACCTGCTATGAAAGATATCCCTTCTGCCGT  
GCGTAAACACCTAGACGTCGTTTACCC TGGCGACAATGGTGGTTCTACAGAAGGACCTCTCCAAGCTAAC  
CAAACCTTTGGAGATATCGTCCAGGATATGGAAACAACAGGGACATCCCAAGAAACCGTTGTATCCCAT  
GGAAAGGAAGCACTCTTCAACGGATCAGCAGGAGGAAGTGGTAGCGTACAAACACTACTGCCTTACC  
ACCTCCAACCCCATCAACTACAACATTAAGAACGGGCACAGGAGCTACCACCACATCCCTTGATGATGGGA  
GGACCAATCAAAGCTGACATAATAACAACCTGGTGGCGGAGGACGAATTCCTGGAGGAGGAACGTTAGAAA  
AGCTGCTCCCTCGTATACGTGCGCACCTTAGACATATCCCTTTGATGGGCAAGGCGATCTCGTAAGTACTGA  
AGAGCCTCAGCTTGGCTCGATTGTAACAATAATTCGCAAGAAACTGGTTACAGGAGGAATCGTAGCTTCC  
GTTGAGAGTGTCCAGGCAAGCCGGATCTGCACAGGCTTAAACAGGTACAGGGGGAGATAAAGGCAACC  
TATTC CAAGCAGCTGCCGAGTCACCC AAGCCTTAGGAAATGTTGCAGGGAAAGTCAACCTTGCGATACA  
AGGCCAAAAC TATCATCCCTAGTCAATGACGACGGGAAGGGTCTGTTGGAAGAGATTTATTC CAAGCA  
GCAACCCAAACAACCTAAGCGCTAAGCTCACTGATTGATACCGTAGGATAAAAAGCAAAGGAGAACAGAC  
GAGCAGAACAGATAAGTTCTGCTCGTGAATGCCTAAGCCATATTTGTGGTAAACATCGTCTACATCGTCTGA  
TGTTTCTAACCATTC AATTAAGCGAGATTCGACTTCCCTGTCTCCTCATCACAATCGACAAGGCGCAA  
CGGAACATAAATTAACCTCTCTCAGAGCAGGTCACCTCCTTAGCTAATAAAGCTTCTTAAACAGAAGCT  
AAATCTGTAGGTTACAGAGAACTAAGAA GAATTCCTCATCGTCTATCTAAATCCCTCTCCTCCACAGT  
CAATCACATGTGTTAACAAGGAAGCTTCGTCTATGGAATGTTTAGGCACATAACATGCCCTTTACGAGA  
AAAATATATAGAACGCTACCGGGCTCCACTAAAGCCCCACCTCGTTTGTAAACGGCTACGCGCATATCC  
GAGGCTGTGCGGTTCTTATTGTGCGGTCATTGCTTCAACAATGATCCCAACTCTCCGAACCCATATAATT  
CATAAGTGACTTCTTCATAATTCCTTCTGATCTGCAGAAGAAGCTTTCTTTAGATTACGTTCAATATTCCTC  
ATTAGGAATATTC TGGTCTTGGCTTTCTGAATGATCATACGTAAACGAGCATTCGATTCGGATCCGGC  
CCCCCATTTTAACTGCAGAGATCAACTCTTAATCGTTTCGAGAAAAAATCTTCCCTTCTTGTGATCTG

CTCGTTCTTTTCGGTGTTTAGTATTGGCCCACTTACTGTGTCTGCCATGCTTTCTTACCTATCGTACAT  
CTACTATCAGGAAACCCCTGACAAATTATTTTACCACTCTGTCCGCAAACACACTCTATGTCTGAAACAG  
GATCCCAAAAAAGGGCGGAATTTTTTAAAAACAAAGTCCTCAATAACCCAACCATCTTACACAAAAGCA  
AGTTTCAGCTCTATGGAAAACCTAGAGGACTCTCCATCGTAATTTTTGCTAAATACCCCAACTCATCC  
TTATAGAAAGTCTTCTGTCTTCTACTTCCACAAATCCAAATCTTTCATATAGGTGAATAGCAGGATTC  
CTTCATACACTTCTAAATACACAAGTCTAACTTTAACTGTGTCTTTCCTAGATGCAGTAAGTTATTCAG  
AAGAGCCGTGCCAACGCCTTTGTTGCGAACTTTTCTCCTACAATGATCGACAACAAGCTATGATGTGCG  
ACCTTGACATAAGGATGAGTATCAACGTAGCTACTCAGCAACTTCGCCATTGTATACCGCCGTTAAAC  
TACTGCGGCAGCGATAAAAACTAACCCAGAAATTCACACTATCACGAATTTCCGCTTCTGTTTTTAAAGG  
AAATCCTCGAAGAATTTTTGGATCATTC AACCAAAGACGCATATAGTGTGCATCTTCAGGAACCGTATAC  
CGAATCTCTAATAATGGATCACGCATAGTGGTCATGTAATTTCTCCATAATCAACCAGGTAGGCTTTGAT  
AAAAGCATCTAGAAGCTCCCCATCCATCATTGCTTGGATGTTGCCCACTTCATATCCAGTCCTTACATCT  
TTCACCAGCGTATAAGGCTGAAATACATAATTACGAATCTGAGATCCCCAGCTGATTTCTTTTTTATTTT  
TTCTATCTATATTC TGTTCCTCTAAACGTTCTTGTAAACAACCTCTGGTAAATCC TAGCGCGCAGCATATT  
CATACAAGCTTCTCGGTTTTGAATTTGACTACGCTCATTC TGACATGACACTACAATTC CCGTAGGGAAG  
TGTGTAATCCGTACCGCTGAATCTGTTACGTTTACATGTTGTCTCCAGCTCCGGAAGAACGATACGTAT  
CAATACGAATATCTCCGGGATGGATCTCAACTTCTATTTTTATCATCAATCTCTGGAAACACTTCTACTGA  
TGCAAAACTAGTATGCCGTTTTCGCATTTGCTATCGAAAGGAGATATGCGTACCAGACGATGC ACTCGCTC  
TCTGCTTTAGCATAGCCGTAGGCATATTCACCGACGAGCTTCA GGGT GATATGCTTAATCC CAGCGACTT  
CCCCATCCAATCGATCGATCACTTCTACCC TCCAGCTATGACTACTAGCCCATCGCATATACATGCGCAG  
CACCATCTCTACCCAGTCACAAGATTCGGTCCCCCTGCTCCTGCATTAATGGATAGAAAACAGGAATTT  
CGATCTA ACTCACAGAAAGAAGTCTGAGTGTTTCCATTC TGTATTTTTCTTTTACAAAAACAATT  
CTTTTTCTAATTC TTTTTGCATTTCTAAATCTTTAGAAGACTCTTCATCTTCTAAAAAGAATGTATCGT  
GGAAACTTTGTTTTTTAATTCATTAAATTC TGATAACTGTTGTTTTAATCGAGGATCCTTTTCGGAATTT  
TTCCCTGCACGAGCAACATCGTCCAAAAACCATCTTGACCCGCTGCTGTTCCAATTCCTTTA ACTCAT  
TTTTTTTTCTTCCGGGTCAAAGAGACCTCCGAGTTAAAGCCAAACCTTCAAGCAAACCTTCCAATCGTT  
TGTCAAAATTC TCATGCATAATCTTGCTAACCTTTCGCAAAATATCCAACCTCAA ACTCTTCTTTTTCAA  
AGAGCTATTTTCTTGCAGTTATTTCCACTATTACGGTGGCGGTGACAGCTAAAACACGCTCATGGTAA  
CATGATCTTCTCTTAGGGATCAATTTCTTGCGTAATAGTCCGAGGAATAATCGTTTTCTAATTC GCTTT  
TACCTCTCTTCTGCTGAAGACTTGCTATGTTTTTTATTTTTGACGATAAACCTAGTTAAGGCATAAAAG  
AGTTGCGAAGGAAGAGCCCTCAACTTTTCTTATCACCTTCTTAACTAGGAGT CATCCATGAGTCAAAT  
AAGA ACTCTGCTTTCATGCAGCCTGTGAACGTATCC GCTGATTTAGCTGCCATCGTTGGTGCAGACCTA  
TGCTCGCACAGAGATCATTAAAGAAAATGTGGAT TACATTAAGGA GAATAGTCTCAAGATCC TACAAA  
CAAACGTAATATCAATCCCGATGATAAATTGGCTAAAGTTTTTGGAACTGAAAAACCTATCGATATGTTT  
CAAATGACAAAAATGGTTTTCTCAACACATCATTAAATAAAATAGAAATGACTCACGTGTTCCCTCGTCTT  
TAAGATGAGGAAGTATTCATTC TTTTTGTTGTTTTTGTGGGTATTACTGTATCTTTAACAACATCTT  
AGCAGCACCTCTTTGACATGGGT TTGGGCCAATCACTTAGAGCCTAACCTATTGAGAGTAACCGGTTTA  
AATTGGAATCTGCCTAAAAAATTTGCTCATCTTCATGGGCTTCGCATTGTACAGATTTCCGGATTTACACC  
TAAACC ACTCGACGCCTGATGCCTTTCTAAAAAAGTATCTCGCAAGATCTCTCTCTTTCTCCAGATAT  
TC TTGTATTTACAGGAGACTTTGTCTGTGCGCTAAAGTAGAA ACTCTGAAAGATTA AAACATTTCTTA  
TGTTCTCTGCATGCGCCCTTAGGCTGTTTTGCTTGCTTAGGAAATCATGATTACGCCACCTACGTATCCC  
GTGATATTCACGGGAAAATTAATACCATCTCAGCAATGAATAGCCGTCCTTTAAAAAGAGCTTTTACCTC  
TGTTTATCAAAGTCTATTCGCCTCTTCTCGCAATGAATTTGCAGATACTCTGAATCCACAAATTCCTAAT  
CCACATCTAGTCAGTATATTACGCAATACTCCATTTCAATTATTGCATAATCAAAGCGCGACACTTTCCG  
ATACAATCAACATCGTGGATTAGGCGATTTTTTTGCCAAACAATTCGATCCAAAAAAGCTTTTACTAA  
CTATAATCCACGTTACCTGGTATTATCC TTTCTCATAATCCCGATACGATTC ACCATCTCCAAGATTAC  
CC TGGTGATGTTGTTTTTCCGGGCACTCGCATGGCCCTCAAATCTCTCTTCCCTGGCCTAAGTTTGCCA  
ATACGATAACCAATAAACTTTCCGGGTAGAAAACCCAGAGCTAGCTCGAGGAT TATTCCTTTTCCCTGA  
AGAGAGT AGGCTCTTGTATGTAACCAGGACTAGGAGGATGGAAGCGTATACGATTTTGCTCCCTCCA  
GAGATTTGTTTAAATGAGGTGCCTCTATGAACCTTAGTTGTTCCCTCGTATTGTTAGGAGGAGGGAAAGGC  
GAGCGTTTTAATTCCTTCCAACCAAAGCAATACACACATCTTTGTGGGAGCCGCTAATTC TTCATGCCT  
TACATGCCTACCAACGCCTACCGTTTGTTCAGAAGTGGTTGTTGTCTGCGAAGAGCAGTACCGGGAAC  
ATTTCTCCCTATTC TGTAATAATTTGCGTCTCCCGGACTTTACGCCAAGATTC TGTTTTTTCTGGATTA

CAACAAGTTTTTACCCCTTGGGTATGTATACACGATGGGTTCGTCCTTTGTCTACGCGGACGAAGTCA  
TTGAAGTTTGTCCGCTGCACGCAAACTGGAGCTGCAGCTTTAGCTTCCCCTGCAACGTATACTATTAA  
ATCATGTGCACCGTTTCGCACCTTAGATAGAGATGCTTTAGCAGTTATCCATACTCTCAATGCTTAGAT  
ACAGAAGTCTTGAGAGAAGGACTTCTCCTTGCCGCGCTATGGATTTCTCTCTATCCGATGATACAGAAG  
CTGCTGAATTACTGGCATAGAACCTACCTTAGTATTCAGCAACAGAGTACAAATCAAAGTCACTTATCC  
CGAGGACCTCTTATTCGCAGAACTCTTCTCTCCAAGTCTCTACCTATAAATAAGCCTTCCCATGACAA  
AAAAAATTGTTTTACAAATCGCTTATCAAGGAACATCCACTCTGGATGGCAATACCAACCTAATGCCCT  
TTCTATCCAAGAAGTCTTAAAAACAATCCCTTAAAAAATAGCAGGCTTTCGCATTTCTGTAATTTCTTCT  
GGACGTACAGATGCTGGCGTGCATGCTCAGGGCCAGATTGCTCATTTCCATTGCCAGACCATCCACATT  
TCACGGATCCAGACAAATCCAAAAGATGCTCAACGCCCTATTACCTCATGATATTGTCTATTCGCGATGC  
TGTCATGACCGACGGAGATTTCCATTCAGATTTTCTGCCATAGCCAAA GAATATCGCTATACGCTATCT  
CTACTTCCATAAACCTCTCCCTCATCATCGCTATTCGTGTTTTAGTCTCGTTATAAACTCAACATAGCGC  
GTATGCAAGAAGCAGCTCAATACCTTGTAGGCACACATGATTTTGTCTTTTTCGAATCTAGGAAGAGA  
GTACTCTTCTACGATACGCCTCTATACTCTAGATTTATCAGAACAAGAGCATCTCGTTACTGTCTATA  
TGCAGAGGAAATGGCTTTCTTTACAAAATGGTACGCAATATTGTGGGAGCTCTTCTCGATATAGGGAAAG  
GGAAATATCCCTCCAGAACATCTTCTCGATATGCTAGCAACC AAAAGATCGCCGCAAAGGTCTCTTCCAGC  
ACCTCCGTACGGACTATCTTTACACCACGTATGCTATCCCTCCCCCTATCAGTGGTTCTGCAAGCATGAA  
CACAATAACTCTAGCGAAGGGAAAGTAATAATACTCTTTCCAGGGAATAAGGACTGTGTTTGGCTCTAGAG  
ATCGTTCTGCATTGATAGCTACCATAGTGGCTGGATTCCGGCTAATGCCTGCAATCCCTTTTACACTATC  
CTCAAATCCGATTACGTGATCTCCTTCTTACAAAACGATTCATGCTAATCGATAGCTATCCGGGGCA  
GGTTTAGGACGTGCATATTCCTCTAGTTATCCAAAATTGCATACACTCTAAAACC GGATGTTCCTTAC  
GGATGCGTAGCGTAGACTCTTTAGAA GAGTTGGTTACAACACCCAAACATTTTCTTCCAATAAGGAGAG  
AAACGTTTCCACACCAGGCATCAGCTGTATCTGCTCACAAGATAGGAGATCATGGTAACACCGATCTCTA  
TCTAAAAAATAACTTGGGAAAAGGCTCGTGTTTCAGGGAACAGCTGTATCAAAGCCTCTTGAAATCGTT  
CCCTCCCTTGCATCGCTAAA GAAT AATATTGGCTAAAAGAGAGTTCGACAGAGACCTTATACTTCTGCCA  
TGCTCTAAACAGGCTTGATAAAAATAAGGCTCGGTATCAATTAATAATCCATCTAAGTCGAAAAAATAT  
ACCTCATAA GAATCTAGACGCATAGCTTCTCTCTCTATCAGGGATGAAAGTACTAGATCTTGTACTTTT  
TCTCTAAC GAATATATAAGCCTTTTCCATTCAGCGGAAACTTTATGAACCTAATACTCTCTCTTACGT  
TATGCTATCGAGCCTTTTATCAGGGTGTCAACAGACAATCGCCAAACCTCTTATATCGAGGCAGCCCG  
CATCACAACACAAAGCTCAGGCTCACTGATCCCTTACCCTGTGATCGAGCCTCGCTCCGCTCCTACATAC  
CACTGGCCTACTCTAAATCCCGGTCATTACAAACTACTCTTTCCACTGCCATGGCACGTCTGGATCAC  
TATCTACAGAAGAACGCTTGTCTCGACTGCAATGGAATCAAACACCTAGCCAAACCCTTTTCTATTCA  
TCCACTCTAGTGACTATTGCACAATACATTCATCATCACTTCCCTATTACTATTGAAGAGGGATATTGC  
TGCTCTATGCACTATAAGTTTCTCCTAACTTCGGATACATCCATATCCGAACAACATTGCAAAGGTTTAG  
CAGCAATAGTCTCTACTCAACAACCAGTATCTCCTCAAATGCTGGCTCCTATTCCTCTAAGCTGTATAG  
AGGCTTGCCGCTTCTTCTAAAACATTCACCCCTCTCTCATAATAACAATTCAAAATGAAGATTTTATCATC  
ACCTCTACCTTCAAAAAGGTAACCTGTGCTGGTTATTGAAGTTCATCATGAGTAAATACCTCTGCTGA  
GCGTATTTTCTTAACAAAAAAACCCTTCTCTCCCTTATACTTTGTCTCTTAA GGATATTTCTGTGTCAGG  
GGAAGAAACTCTATTTCTTCTTCTGTTTTTCAGACCTAGATGGTTATGCCGGCGTGGCGGAATGGTAGACG  
CGGTAGACTCAAAATCTACTCTTAGCAGTAAGGTGTTGGTTCGAGTCCAATCGCCGGCATTAAATCACATT  
TCATGATTTATATTGCTAATAATTCGTAGGACCCCTTTCTTGAAGAGAAACGCGAACAGGCAACTCTTTT  
ATGAAA GAATCCGCTCTTCTCCCTTATTGAAGAAAAAAGGCTTTTTCTTATCAATCCCTTGATCTAA  
CTCAAGTCGAAGCTTCGCTCTCTCCGAAAGATCTCATTAAAGTATTACGGCAGAAAAAAACTCTTTTATC  
TTGTATAGAGAAAGTCGACCATCAAATTAATAAATTTTCGGATAGTTTCTCTTTAGCACTTCCCTCAAGAA  
GTGCAAGAAGAACTGGAAGAAATCCGATCTGTTATTCAGCGCATTCAGAAAACAGACAAAAAAACTATT  
GTATAAGAAAAAGAGAACTGGGAACCTTATGCCAAAAATCGACACTTGTGATTCCTGCGTTTCCAATACCG  
AACTTTTGGCCATTCGTACGC GAGTAACACAATCGTATAACGAAGCTCAAACCATCCATCTTCCGATTC  
CGATGGCATTTTTCTACTTTCTGAATCTGGAGAGATTCGATTTGCAATCCCAAGCCCGGCTATTTTA  
GGCATCCCTAAGGACATCCAGCTGGTCCACACGGAGGTTCCATGATTTTTTCCCGATACTTTTTTTGGAT  
TCTCAGTACAAGAAGCTTTAGAAAAAGAAGTCCCTCCTAAAACGATTCGACTAAACCCTATCTCAAGAACT  
CTCCCAAAAAGAGGTAGAAGTTTTTGTAGGAAAAATATCTCTCACGGCTTCTCTTCTTCTCTATCCGC  
GACCGGTCCGACTATAGGCAATTAGAACAAGCGATTGAAAAATACCGCAGCATTTCCGAGTTAGGGAAAA  
TAGCTGCAACTCTAGCACATGAAATCCGTAATCCCTAAGTAGTATTTTCAGGATTCGCAACCTTACTGAA



AGAAGAGCTCTCTTCAGAACGCCACCAACGCATGCTCAATGTCATCATAGAAGGTACTCGCTCATTAAT  
TCCTTTGTTTCTTCTATGCTTGAATATACAAAATTC AACCTCTGAACCTTCGTTCTATAGACCTACAGG  
ATTTCTTTTCTTCTCTCATTCCAGAACTCTCTTTAACCTTTCTTCTGTACATTTAGAAGAACCATCTT  
ATCTCCTATACAGCGCTCTATAGATCCGTGATCGCTTGCATGTGTGATATGGAACCTTGTAATAAATGCC  
GTCGAAGCATCGGATGAAGAAATCTTCTAGAACTACATGAAAAAGGTTTTCGTTATCAATACCGGCA  
CTCTTCTCCTAATATCCAAGAAAAGCTTTTTATTCTTTCTTCACTACGAAACCTCAAGGGAACGGTCT  
AGGCCTAGCAGAGGCTCATAAATCATGCGCCTGCATGGCGGAGATCTGGTTGTTTCAACCCAGGAT AAT  
CGTACTACCTTTACCATCCATATGGACTCTGCTTAAGAGCAGTTATCAAATGCAAAACACTCACCTCTGA  
AAAACCCCATGTGCGATAGAACACATTC TTATTATTGACGATGATCCCATATCC TGGCTCTTCTTTCTGA  
GATACTGGGCGCTCGGAACTTTT CAGTGTCTTCTGCTCCAGGAGTCAAACAAGCTATTAAGCAGATCTCT  
AACTGTCCTTTGATCTGATTATTTCCGATATGAATATGCCTGATGGTTCAAGGATGGATATTATCCAGT  
ATACAAAACAGCATCGTCCGCAAACCCCTATCTTGGTCATTACTGCTTTCGGAAC TATTC AAAATGCTGT  
TGAAGCTATGCGATTCCGGAGCTTTTAACTATCTGACCAAACCGTTTTC CCCC GATGCCCTTTTTACTTTA  
ATCGCTAAAGCCGAAGA ACTCCAAGCGCTACAACAAGACAACCTATTTCTACAATCACAAGGATCC TCCA  
TCTCACATCC TCTGATCGCCGAAAAGTCTTCCATGAAACAGCTACTTGATAAAGCTCGCCGAGCGGCTAA  
CAGTTCGCGAATATATTCGTACACGGAGAATCCGGATGCGGAAAAGAAAATCTTTCATTTTTTATCCAC  
AAGCACTCCCTCGATCTACTAAGCCCTATATTAAGTCAATTGTGCTGCTATCC CCGATACTTTGTTAG  
AATCTGAGTTTTTTCGGGCACGAAAAAGGAGCTTTCACAGGAGCAACCACGAAGAAAGTAGGAAGATTTGA  
ACTCGCCACCAAGGCACTCTTTTACTAGATGAAATCACAGAAATTC CGATCCATTTGCAAGCCAACTT  
TTGCGGGCAATACAAGAACAAGAATTC GAACATATTGGAGGAATAAAAACCC TCCCTGTAAACATTCGAT  
TTCTAGCCACTTCCAATCGTGACCTTGAGGAAGCTATTGAAACCAAAGTTCTCCGTCAAGATCTCTACTA  
TCGATTGAGTGTGATCTCTTTACACATCCCTCCCTTCGCGATAGAAAAGAAGATATCC TCCCTTTAGCT  
CATTACTACTTAGAAAAATTTTTGTAAGATGAATAATAAGCCTCCAAAAACATTGTCTTTAGAAGCGCAA  
GAAATCTTTTGGACTATTCATGGCCTGGGAATGTTGAGAACTCTCTAACGTACTCGAACGAACGTTAT  
TCTAGAAAACGATCC TCGCATCACTCTTCTATGCTCGCTCTCTTATAATGATTC TTAACAGGAGTTTTT  
CTTGATTTT CAGAAGCTTTTTCTGGTAACCTTGGGCCCTTCTTGTGCACCGATAGCTCAACTGGATAGAG  
TACCTGGCTTCGGACCAGGTGGTTGGAGGTTCGAACCC TCTTCGGTGCAGATTC TCTAAAAC TCTTTTC  
AATTTTTTTTATTC TAGTATAAGCGACCCGTTATAGCTCGCTAATCACAGAAGTCTTTTTTAATCC TATGAG  
CACCCCTCCTACAGATGCGCATTGTCTCTTCGATCC TATTCGCTGTAAACCCGTCCCTCCCTTTCCGAG  
GAGCACGTTAGACAGGCTTTGCTCTCGTTTTCTCATCCAAGAGCTCTCCTATCC CCAACAACAGATCATTG  
TGGAAAAAGGAATCAAATCTGTATTC CAGCATCACTCCGCCTCTCCCTAAAAAATGCGAGGAAGAGC  
GGATGTACTTATCC TATCTCCCTCCTTACGTCTCTCAGAAGGTGCTTCTATTTCTTTTCCC ATCCCT  
CAGCCCCTACTATTAATGAATGTAAAGCGAAAACAGTGACCTCTCTCTCTTTCAGTCAATTGATTAGCT  
ATAACTATTTTATCGGGGCCCTGTCTATCTAATTAGCGCAA ACTCTCAGCTCACAGGTTTTTTATC  
CCCAAAGACAAAACATTCGCTTTTACCAAGGGATTCCTTCATATTC TCAACTGATGAAC TCTATATC  
CATACATTTTCATGCAAATCACCC TTCCCGAGTGTTCCTAACAACTCTCCCGCTGAGAAACAACATGT  
TATCGTAAAAATTTCTCGCCAGCAGGGCTTCTTCTGCTTCGCAAAAAATGGAGCATCCCTATCC TGC  
GATTTTCGAGAGTCTCTGTTCCCATTTCTTTTAGCCTTTTACGATTC AACAAATCTCCTCCCAAATGC  
GAAAAGTCATACAGGGGGAGCTCCAAAATCC TTTCAACGATTAAGTTCGTATCC ACTTTTGCAAAG  
CGCAGGAAAATGATTC AAGCGATTC TCAAAACGCAATGGCATGAAAAGCCCTCTCCCATCTCTTTCT  
CTTTTTTTTAACTTCTTCAACGAATTC CAGAAACGCAATACCC TAATTTTTTTTCTCGATGTTCCCTAC  
TAAA ACTCTTACAACATGAGGGAAGCCTAGATCTATCGCGCTCTGCACCTTATGTA AAAC TCTT TAGA  
ATCTTCAACTATTTACCGTTATGAAGGAGCTCTATTTTGTGAAAAACATGCTCATGAAGAAACGATCTCC  
TTCAGCCAAGAAGAAGACCATATTTTAA GAGTGATCGTACAAGCAAAAAATTC CAAGAGCTCGTTTGT  
TAGCAG AATTCCTATCGACATCGATACAAAAATAGATGCCCTATTC TCCTCCTTCTTTT CAGAAACATC  
CGAGCCTTCTTCTATATTACAAAGGGAAAACGCTTCTCTAACGGAGAAAAATA ACTCCTCCATTACGA  
GTCTCTACATGAAAAGTTAGCGTCACAGGGGATTC TCC TACCAA GAATTC CGAAAAGTTTTCTTCCAAA  
AACCTCTTCTCTCTGATTAGTGATCCCTCTGCAACTACTTTACTATTC ATATCAACCTGCGTATAGAC  
AACTACACCAATGTCTTTAGGTAACATAATTGTAATTGGCTCTTGCTCATTAC GAATATAAATAGACGCA  
TTC TTTTCCACTCCCTCGAAAATCTAAATCCATTC TGCAGGAGGTACAAGAAAGATTTACAGAAGACA  
GTTCTGGACACTCTCCCTTATTTTTCGAACGCAGCAATCC AAAAGATCCCTTATAAACCACGCTCTCCAA  
CTTAGGGAAGCTTCCCGTCACATCAAATGTACACGTTTTTTTTCTTCTGCATGGAT TTCCATAGTTTCC  
ATATCTGGATACTGCCAGAGAAAACAAACCGATCC ATATAAAACTGCTCTTCTTCCGCAAGAAAATGCG

CGCCGAAAGCGGGTAAACTCAACGTTCCGAAGATTGTCAACAAACAACTAGTATATGCACAATAACGCC  
TCTCTTCTCCATCACGAAAGAAACAAAGCTCTACGCATGCACAACGAACCTATGCAAGCAAAAACCTACCG  
TCAGCATACTAGAAAAGATAAAAAGATTATCAAAATGAAAAGCAAAAAGAGGATCTGGATAACAAGGAAAT  
CTTGCGAAAGAGGGGACTCGAACCCTAAGGAAAGCTCCACTACCACCTCAAGATAGCGCGTATACCAAT  
TCGCCACTTCCGCAAAAAGAAGACATGAAGAACCAGCTTACTCTGATTGGACTCTTTACTACAAGTAA  
AAAACCTCTCAGCTTACAAATTCCTATCTATTTTAAAGAAAAATGGAGGGTTTATCAGAGAAAACTCT  
TATCCCTCTCTATCTCAGTATCTGCCCATACTCAAACAAAGTCTCTGCAAAAGGTCCTGCAAAAAGCCTAT  
CCCTTATTGTAAGAAACCACTGAATATGAGACACTCTTCCTTTCAACGATATAGATGTAATTTCTACCA  
TGCGCTGTTAGCTTATTGCACTGCTTCATCCATCACTTGCACGTGCTCTTTTATCTTTTAAAAGTAAA  
CTACCCCTCAGTTCTATCCCGAGAATACGTGCTGATTTCTCAGAGGAACTAGATGAAAGCGACAAAGCT  
GCTGTTTTCTTCCCTTTGGCGTTTGGCGTGTCTGGGGCTGGGAAGAACTGAAAGAAATACAAGTATCC  
GTGCTATCACCCCATCTGCAGTCAATCCCTTTCCCAACCCAGAAATCGATAGTTACGATTTCCATTACGG  
AGAGAAACTCCAAATCCGTCGCGATAGGCTGGTTCTGACTAACTCGAACCTAAATACAAAACCTTGCTATT  
TCCTTTGGATTAGCTCAGTCTATCAAGCTTACAGTTTTTCGAAGAAACGATTTACAAAACGGTTGAAAAC  
CGAAATCTCTTCCCAAGAACTAGCTTCCAAAGGGAAAATTTCTCTATCCCGTAAAACGATTGCAAAAA  
AATCGGGAACTGTTTCTAGATAAAGCTTCTGTGAACCTACACTCCGATATCCCTTGATGAACCAGATTTCT  
TTCTGGGAACATCCAGAAACTCAACCTTTTTTACATCAATGTTTTAACCTGCCTAGACGTCAATGCTCGCG  
TAAACGTGCTGAATCATAGACTTGCTATCTTAGGGGACGTTCTTGAAATTTTAAATGACCAACTAAACCA  
TCAACACTCTCCGCTTTAGAATGGACCGTAATCTGGTTAATCGCTCTAGAAGTGTGGTACACTACTG  
AAAGACGTGTTTAAACATCATATAAAGGTTATGCAAACCTCCCGGATCAGCTCTTTTTTCCGAGGGCTTGT  
TCACCTGTACCGTTGGCGGATTTCTCCTTTTTCTCGGGGCTCCTGTGCGTTTTTCCCTACATGCTCTGAG  
TACGCTCTTGTGCACTAAAGAAACATCCGCTCAGAAAAGCCTTTTTTCTCATCGCCAAGCGCTTACTCA  
AATGCGGCCCTTGGTGCATAGGAGTATCGATCTCGTCCCTAGAACCTTCTGTTGAAAGAAATATCTCAGTTC  
CCCTACCCCTCTAGCAGAATCCCTGACGACAGGACTGTGCCACACACCCCAAGAACTTCTTAGTATAGT  
GTGCCTCTCTAGGCAAAAGTTGAATAAAGGATGTAAATCGCTATCAGAAAACCTCATGCAACACCCAGTC  
CGCGTCATGTACTAACAAGAGAAGAGCTGCTAAAGGTTCTGTCTATCCACATAAGCTTTTCAGAAAACAG  
CGCCTCTGATGATCAGAAATCGCCGTTTGACGATTTTCTAAACAACACAGGGAAAAAGAAATAGTCTCC  
CTCCTTGGATAATCATTTCTTGGCCAGAGAAGCGACCGAAGCAGCTTCGATTTCCGCACCAAAAAGGAGAGA  
ACGCACATAGAGAAAACCTCAGGAAGATGACAAAACCGATACAGAACATCTTCCATCCACCACCCCTGCTTCA  
CAATCAGCACCATAATACGAAAAAACCTCGTGAAGAAGAAATGGAAACCTCTCTGTAAGCAAATACTGAC  
AAATCCGTGTAACACTCTGATCATTAATATCCGGAAGTAACCAAGTACGTTTCAGGACTTTTTGAGTTTAAAT  
AAAAGTTAAAGGATGCGTCAGCATAGGAGCGATATCTACAAAATATTTTTGGATGCTCACCCCTAGAGCC  
CAAGATTTTAAATGGATGGCCGAAAACCATTTCTCTTCTGCAACAAGGCTAATAAATCGGCAAAACGAAG  
CATTTCTAGTCTTTCCAAAATGCTTTCAGGAATCTTCCCTATTCGTGAACCTTTAGCGATGAGATTCCT  
TGGAAAAACCCCTTAAATTTATAAATATCTTTTCTAAATACGGTCAAGAAATCAAAAAGCAGTAATAGGATA  
TTACAATAGAATAAGAACGAGAGCTTGCTTGAGCCATTTAATCGTTTTTTTACTTTGCATAGCTCCTG  
ATCCCTCTTCCCTTATCCCATAAAAACTCTTACATCCCTCTCCTCCTCAAATACTTGCTACTATACACGC  
CACTTCGTAATAATCTACCAAAAAAAGCTGCATTTACTCATGCTCGTTCTTTATCCCTATTACAAAAT  
TCTTCTTCTCCTCTCTCTATTGAGGAAATTTTACAAGCCTGTGATCGTATTGAATCGAAGCGGAATG  
CTCAAATGTTTTTCCGGATCCCTTAATACTGTTGTAACAGGGAAAATTTTAAAGTGCCTCTCCTCATCCT  
GATGCAGAAAGACTTACTGTTGCCATCGTTTTTGGACGGAAAGGGTAAGCGCCAAATCATCTGTGGAGCTC  
CCAACCTGCCGAGCAGGCATCATTGTTCCCTATAGCCTTACCAGGAGCTAAGTTACGTAATGCTTCGGGAGA  
AATCACTACAATCAAAAAGCTAAAATTCGTGGGCTCGAATCACAAAGAAATGTGTTGTGGAGCAGACGAA  
TTAGGGTTCCCTCATTTACAAAAGCACAGCGTGGTATTTTTGAGTTCCCTGCAGATACTCTCTTGAG  
AAAGTGCCTGCATGCTACTTGTGAGCTTCCCTAGAATGCTCGTTAACCCCTAATTTAGGCCATTGCGC  
ATCCCTTACTAGGCTTAGCAAGAGAAATTTCTTTCTATCCCTGTATCTCTAATATCCCGGAAAGAAATTT  
TCTTTTGCCTCGCTTCCCTCAAGAACTTCTATTTGTGATATGCACGATGCTGGAGCTTGCCCCGTATCT  
ATTCCTGCAAAATCTCGGGTCTATCTTGTGACGATCCCGAATATCTGCAAGCAGCCTTAACAGCTCT  
TGGACAAAACCTCTTAAACGCCATCGTTGATATTAGAAATATGTGATGCTGTCAATTAGGTGAGCCCTA  
CATGCTTACGATAGCCAAGCGGTGGAGCAAAAGTCTCTCCATGCAGCTACTCTACAGTCAGCTCAACCAC  
TTACTCTTCTAAATCAAGAAACCTATACCCCTCCCGCAGGATCTTTAGTCTGTTGCTGATCAGCATAATAT  
CTTAGGATTAGCTGGGGTTCATGGGAAGTGTGATCTTCTTGGCTCAGAAAATACAACAGAAATCATTCCTG  
GAAGCCGTTACTTCCAACCTCAGGCTGTAAGAAAATATCAACGCACGATACAGCTGCACACAGAAGCTG

CCTATAGATTTACCCGAGGAGTGGATCC TCAAGGCGTATTACCAGCGTTACATGCTGCTATCCATATGAT  
TCAATCTCTATTTCCGGATGCTCAAATCTCTCCTATTCAAAAAATGGAGATGATAGCTTTTTTCCTTG  
TCTTTAAGCGTTTCGCCCTAAAACGATTTAAAGACTTCTGGATATTGAGCTCTCGACCGCAGAAATAGTTG  
CCAAACTCTTTTTCTTTAGGATTTCAAACAGCAGTAGAAGAGCAGGCCGTTCCGAGTTCGAGGTCCCCCTCTTA  
CCGTCATGACATTCAGGAAGAGACCGACCTTGTGAAGAGATCTGTGCGACCACACCATTCGTTCAAAAA  
ACACAAAAAATACTCCGACCTATACTCCGATCTATTC TTTGAAACGTGAACTCACAGCTTTCTTAGCAA  
ATGGTGGGCTACAACAATTC TTTACCTGCTCCTTGCTGGATACAGAAGTATCTTCCTTATCTTTGCAAGA  
AAGCTCTTTGATTCCTGTACAGAATTC TTTCTGAAATTACGCGACTCCCTTCTCTGCGGATGCTAAAA  
AGTGCGGCTACTAACCTCCATAGGCAAGCCCCCTATGTTTATGCTTTTGAATTTGAAATGTGTACTCGA  
AGGAGCAGAACCGTTACCAAGAGGAAGAGCGTGTGCTATTTTACTCTCTCGCCAAGTAATGGATGATTC  
CTGGCAAGGGAAAAACCTCTCTCTTTTATAACAATCAAAGGATGGGTGGAAAACTATTATGCCAGTCA  
GGAGCTTCTATAGAAGACTTTTTCTCTTCAACCCAGCCAGCATCCGAACTTTCACCC TTTATCAGCAAGCTG  
CCTTGTATCAGAAAAACATCTATTAGGCATCTTTGGGACGTTGCACCCACAACCTATGTAGAAAAGCTCA  
GATCAAACACGATGTAGTCTTTGCTGAGCTTTCTTTAAATGTGCTTTTGTCTTTAAAAAAGAAATCCGGA  
CCTCATTACGTACCCATCCAACTATCCAGCCTCTTCCAGAGACATTACAATTACAATAGATAGAGATC  
TTCCAGCAGATCTCGTACGCAGAGAAC TTTTAAAGTTTGAATCTAAATGGCTTGAAAGTGTTCATATTGT  
CAGTGTATATCAAGGGAGAGACTCTGCATCTCAAAGTAAAAACGTTTCTCTTCGGATGGTCTCCGTGAT  
CACGAACGAACCTTATCCGGGCAGGAAATAGAAGAA GAATACGAACGTTTAACTGCATTACTTGATAAGA  
AATTAGCCAACATAGGACAAGGCAACTCATGAAGCGTTTATTTTATCTGCGCCCTCGCCCTTTCTCCT  
CTAGCATATGGAGCTGTTCAAAA GGATCC TATGTTAATGAAGGAGACTTTCGTAATAACTACGGATCA  
TTGTCTCTAAGCAA GAATGGAACAAACGTGGATGCGATGGCTCCATCACTAGAGTATTC AAAGATGGAAC  
TACAACCTTAGAAGTTTATGCGCAAGGTGCTTTACATGGGGAAGTCACACGAACGTTTCTCTC ACTCTACT  
ACCC TGGCCGTTATAGAACTTATGATCAGGGAAGGCTTCTTTCTAAGAAGACCTTCTTCCCAAATGCTT  
TGCCTGCTAAAGAAGCAGTTTACCACGAAGATGGGTCTTTCTCCCTAACACGTTGCGCTGACAATAACAA  
CTCTGACACAATCACAGACCCCTGCTTTGTAGAAAAAECTTATGGGGGAAGAGTATTGGAAGGTCATTAC  
ACCTCTTTTAAATGGAAAATACTCTTCAAAAATCC TTAACGGCGAGGGAGTTCGCTCTACTTTTTCTTCGG  
ATAGTATCTTGTGACAGAAGAGTCTGTTTAAATGATGGCGTAATGGTCAAAAAAACGACATTTTACTCGAC  
TCGAGAACCCGAAACCGTCACTCATTATGTCAATGGGTACCC TCACGGAGTTCGTTTACCTATCTTCCT  
GGTG GGATTC CAAATACGATTGAAGAATGGCGATATGGACATCAAGACGGCCTTACAATCTTATTTAAAA  
ATGGTTGTAAGATTGCTGAAGTCCCATTTGTACGCGGAGCAAAAAATGGAATCGA ACTCCGATACAATGA  
ACAAGA GAATATCGCTGAAGAGATTTCTTGGCAGCACAAATCTTGCATGGAGTCCGCAAAATCCATGCG  
GCGGGGGTATGCAAAATCCGAATGGTATTACAAGGCAAACTGTCTCGCAAATCAAGTTTGAACGACTCA  
GTGCCGCCAGATAATTC AACCTTGGGAGCGTCATGGCTGAAAAGTTCTTTGTGTCTCTCCAACGTCCAA  
GAACTGTTTGGCCAGGCTTGTCTCAAGGGCTTCTATAAATAGA ACTCCCCCTATTC AAATTTATGTG  
CATTTCCGGGGAGATTC TATTTTTCACTCAAGGCTCTCTCCCGCTCCCGTTTTTACCTGTTTTATTCCTTG  
GACCAGGAGCACATAAGGCTATGGAAGGACTTGTCCGCTGGTGTGAAGCCTACGCCAATAAAATGCCGCC  
TAAACTATCTTTTCTTGATCTATCC TCTTTCAAAGAGAAGCGCTGGCAATCC TACAAGAAATACGCCAA  
ATCCCTTTCGGCACTCGTCATACCTGTGAAGAGATTGCAGAACGCACAAAAACCC ATACGGAAGAGGTGC  
TCATCGCTGCCAAGAAAACCCCTTACCCTACTGATTCCTGCCATCGAGTACTTTCCATTCATGACTA  
CCC GGGCGGGGAAAAGCTTTACAAAGCCCTTACC GAATTTGAAGA ACTCTCTTAATCC TGCATCTTAGGA  
TCTAACGCATCC GAATCC CATCTCCAATCACAGCAATAGCCATTAACAACAATGTCAACATAATAGCGG  
GAGGCCATAGAATGGCGCTCTCTGATGGAAATGCTGTG ACTCCTTCTCGAAAAGATTTCCCAAGATGC  
CGA ACTCTCCTCTCCTAACCC TAAAAAAGTGAGCCCTGCTTACAGCTAATCATAGCCATCATCGAGAAC  
GGCAATAAAGAAATAACCGGAACAATCACGTTAGGAA GGATCTGATGCACCATAATATGGTAATGGCTGT  
AGCACAAGTTGGTAGCAGCTAGAACATACCC TAAATTCCTTTGCTTTAAGGTTTCTATACGCACATAGCG  
ACTAATACTGACCCATCCAAAGCATCC CAGCAATACC GAATCTAATATGAGAGATTTTTTTTTGTGTAATA  
GCTACCACGAGCATAA GAATAAACAACATGGGCATGGTCTCCAAATTTCTGTCACTCGTGATAATAACA  
TGCTACCTTGCCACCAAGTAGCCAGATAACAATCC CACAATGATGCCTATAAATAAAGCTATAGAAAC  
ACCC AATCCACCAACAACGATCGCAATAC GAATCC CAAAGATCAGAGAAGC GAGTAAATCC TTTCTATTA  
ATGCGTGTAAAGCTGCCACCAATGCACATACTTGTTCATCTCTCGAGATCCGCCGGCATCATCTTCCAGT  
GAAAGCTGCTTAATAATGGATTC AAAACCATTTGTACCTGTTTCAGACTCGGTTTCTATCC AATTACGCTT  
ATCCATGATAAACGTAATCGAAT TATTTAAAGCTTACGCTCTTCTAAAAGACTACGTACAAAGGCCAAC  
TGCTCTCTAAAAGGAGCCTCTTTTTCTCAAGAGCCTCAAACGCTGCACGCA ACTCTTCTTGGGGATGTT

GCTCGTATATCGCCATATTCAGAGCATGTTCTGAACGTGCTCTAGCCATCAAATAAGGACGGTAATCTTC  
CAGCAAAGTTCCCCATCCTTCAAACCTTCCGGATAGGAAGCTTTTAACTTGTGATCTTATTTTTGAAA  
AAACGCAGGCTTGCTGTTTCGTTCTTCAATTTCTAGAAAACGCA GAGTCGGCATCGGAGATTGCTTACACA  
ACTCGTATGCCTCCCTTTGTTTTCAAGATGATCGTGCTGCATCTTGCGATATTTGGCTTTTACAAGCAT  
TCCAGCTGCTCATATTTACTCATATAAGCACGCTCACTTTCCCAAGTGCCTGTTCTTTTAGCAATTGTT  
GGAAGAACTCTGTCTTTGGAGTTGTTTTCAATTCCTGTTGCAGATGCTTAGCCCGTTTCTGCTTTAACA  
GCTCATCCCGACAA GGATCTTGA ACTCTCCC ACTCAAAGCAAAA GAATACCGCAATATGTATTC CAGT  
CACTACACCTAGAAAACAGCTTTTTCCACACACCCTGAGATAACGAAAGCCTAAAATAAAAAACGGCAGT  
GTGAGCATTAAGACATTAATAAATAAATCGATAGACTTAGTGTA AAAACCTGGGAAAAGCAAATAACGGA  
ACAAGGGG GAATACC ACTCCCCGTGCCAACGAACAA GAATCGGTTTACTAGAAGC GAATAAAGGAGCGTA  
AATACCAATAAGCATAAGTCCAATAAAGA ACTTTAAAGCTATAGAGGGAAGTGCCCGTCTATTATAAGCA  
CGAAAAATCGTTGATAAGATGTTTGGGTTCCTTCATCTCACACCTTCCTTTCTTCTAGCTGTACACGT  
GGATCAAGAAGAACGTAACAAATATCC CCGATTAAGTAACCGATCAGAGAAATCACC GAATCC CATAATTA  
CGGAAAACATCACCACATTGTGATCAGATTTA GAATCGCCTGATAGAAAATTTCCCGAAAACCATCGAT  
ATCAAATAGTGTTTCCACTACTAAAGCTCCTCCAAGTAGAGCGCTTAAAGACGAGGCTAAAGAAGTGATT  
AACGTAGCTGCA GAGTTTTTCCCCACATGCCGAACCAAATGTCATACTGAGAAAATACCACGAGCTCGAA  
GAGCTGAAATATGGTCTTCTCCTAAGACTTCTAAAAATACAGCACGACTTAAACGTGACTGTGCAGCAAA  
AGCTCCGTAAC TGACAGCACAAAAAGGCAAGAACTGTGTAACACAATATCCGTCAGCTTTTCAAAGAA  
GTCATTTCTTT GAATATTTCTGGAGATGAACACAGTCCACTGTAAGGCATAGAAAATGGACGTAAATGGAA  
CTGTTTTATTTAGAACGAAATTATCAATAATCC AAGGACAGCAACAAAGACAG GAATAGAAAATAAAAT  
CAAAAATAGAAAATGAGAAGATGATCTATCC AATGTTTTTATTCACAGCCATGATCATACCGAACCT  
TGGCATAATATAAAAACCAATCATAGGAAGCAG GGATAGAATAAGTGACGAACCTAAACGTTTGATCA  
CTTCAGAAACGACCGTCTTATGACAGTCGTTGCGTAACGTTCCAAAATCC AATCTAACGATACGAGAAAG  
GTACTTAGCAAACCGCGTCTCTAAGAAAAGATCC TCCAGAGATCTTTCGCATTAATTGCCCTCTCCG  
CCCTCTTGCTCA ACCCATTC TTGTAACGCGGCAACTTTAACTTCGATATTATCTTCATTC AATAAACGCA  
CGAGTTCTGCATTGCTTTTAGACACTTTTTGATTATATTCGCGCTGTTCCCTCCAGCAAACGTGCTCCAAC  
AATCCCTGAC GAATACCTCCTC GAATGAATAAATCTGCTGCAACATGTGATAAATATCC TCTTTCGAA  
GAATCTTCAGCCTCTGCAAGCAGCGCCGGCATAATGAAC TTGGCACAATCTCCCAATACACCTTAATAT  
TGGTTATGCTTCTGTCTT ACTCTTCTTGTGAATCGTCCCATCAATAATCTCTT GAATCC CAGCACGGAG  
TTCCGATCGAGAAATCTGTGGTC GAGTATTA AAAAAAATAGGGAGAGTTAATCC GTAATGCTCTCTAAAT  
TGTAATAACGGTCCGCCCCTTTATACGTAC GAATCTTATCCGATCTCCAGCCTCACCTGGGCATCCA  
CACTATGTTCTCAAGCAGGTCTCCTGGAGCAGCATTGAGAATCACAAAATTCACAGAGATGATAGCAAA  
GAGCGTTAAGG GAATCAAAGCAGACGTTTTAAGATATAGCGGAGCATCGACCC TCCTCTTTATCTACCC  
ACAACATGGATAAATTC ACTGTCTCATCTTGAGCTCCAG GAATCAAATCC TGATGTTCTGTTGGCACAAA  
AATATTTTTTACAACTCCTTATAGACAAGGGAGTACTGTCTT GAATAGAGAAACGCGTAAGGAGATTCC  
TCATGAATCACCTCGTAAAACGGTGATAACAAGCTTGGCGCTTATTAGAATCATACTCGTAACTGAGCT  
GTTGATGATACGGTCTGCTTCCTCATTACAAAATCC AACAGCATTGGCAGATCC TTTCTCCAAAGCTCC  
TTCC GAATGCCATAGAGCACGA GGATCTTCTGGAGGGTTCTTAAACACCATCCGGAAA GAATAGCATCG  
AAATTTTTCTCCTCGAGGGCTTGT GAATAATCCGCCATATCTA ACCCGAGTAAGCAAC ACTCGATACCCA  
CCTCTTTACATAACCGTAGCTACATATTCGGCAATCGTTCGTGCTGTTACACTTTTCACATAGTAGCATAA  
CCGGAAACGGAAAGGCACTACA ACTC CATCGATTACTTTCTCAC GAATACCATCTCCATCAGCATCGATC  
CAGCCCTCTTCTCTAATTTACGTGCGGCTCTTCCGGAGAGTATTGCCATCC CTCTACATCTCTGTTGT  
ATGATGGAGAGCAGAGAGAAAAGGCC ACTCACAGAGACTCCACGACCATCC AAGCACTGCTCAATAAT  
GCGATCCCGATCGATCAACATATTCATGGCTTGTGCTACCGAACGATTGTTAAAGAAAAGAGAAAAGCAA  
TTCATCCGATGTAA GAATAGGACCGGTCTGAT GAATTTTTTTCTAAAATTGCCCTCTCCTCTAGCAGCTT  
GTTCTTATAAGCAGAGGTTTGCATGAAGCTCGCTAGATTATCGACATGGTTAGGAGGGAAATACGCAAT  
ATCCACCTTCCAGCTTTGAAATCTTGGAAAGAGA GAATCTGTACTATCTTTCATATAGATATAGCGCTTC  
TCCACAAGAGCCGCAAAC GGAT TATGATAATTAGGAT TACGAACTAAAGTAATTTTCTCATC ATCCATCC  
CTGCAAATCGGAATGCTCCACAGCTCACTATGTAATTATACGCCAATGTGAAGAAAAGTTTTGCGCCCA  
TACC GAATCTTTGCGATACGTATCG GGATCAGAATCTTCTGGAACGATCTTCTCTCCATTTGCGAAATAC  
TGATACACGAAACAAGGTAACGGTTG GAGTGCCAATGTATTCGCGAAAGCA GAATAAAGCACTTTTTTCT  
CTTCTCTCCTGTTTATTACGTACAGTATGAGCTCTCCAACGAACGATTAATTTCAAATCGTTTTCTAC  
CCGAACCGAAACCATATCC TCAAAAATAAGATCTCATAGCCACTGCACGATTTCTGCAACATAG GGATTC

ATGACTACATCGTAATAGAACTTCACATCATGAGCGGTGACAGGATGTGGTCTTAAGAAGGTGTCTGCTA  
AAGTTATATTTTTAGGGAACAGCGTAGGATCTATCGGCTCCCAAAACATATTAGGACGCAAATAAATATG  
AAATTC TTTATCC CCAG ACCCATCC TCTACATAATGCTCTTCTATCTTTAAGGCTAAACTAGGCGCAAAC  
TCCTCGTATTTACCAACATGCTCAACAGCCAAATTAGGAACGCACAATTCATAAAAATCGAACGATATTA  
CAAAGCCATTAACGGACTTAGGTTATCAGGCCTTCTACTTGAGCTGTACGCAAAATACCTTTCGGAAC  
AAAACCTTCCTTTAACAACGAAGGGACCCTTTTTCAACATAA GGGTCTTCGCATAATAAATTAGGGAAC  
GCAGGATCTCCGCAATCC TTCAATACACTGATCTCTGGAGAAACAGAAAAATCTATAGACTGG ACCCAAT  
TTTTTTGCTGATGCGAGATCCGGACTA ACTCAAGAACATCTTCATGTAAAGCCTTGAGTTCTCTTTTGAT  
CGATTTACATCTTTTTCAAGTAGATCTGAAGACCAATACAACAG GAATAAGGACAGAACCAGTACTGTT  
CGTATAATTTTTATCTATCATGCGTTGTCTCCTCTATTC GTTGAAAACGCACCAAAAAGTCTCAAGACAGG  
TCTA GAATACTC TTATCAATCT GGGT TTT GAATTC TAGTAACTAGC GAAT TATAGCAAAGAAAAGCTTT  
TTCCCTTTACAAAAGATGATCGACTTACTGAAAAGAAATATTTCAAAAAATATTTAGGAAGGAGCTGGT  
ATAGA GAATCTTTTAAGAAAAAAGAGAGT TGA AAAATTC AACTCCTTTTTAGAAAAACTATC GAATA  
GGATCTCTAGTTTCTTCTCCACCTTCTTCCCCTTCGCAAGCTAGGGAAACAATAAGAAGAAACTTCTT  
TTTTCTTTCAGTCTCATCAGCGTAAACGGAACCAGCAGCGGCAGCAGAAGTTAACATTGC GAGTAAAAG  
TAATTTTTTTCATTGGCGTCTCCTTTTTAATAGGTAGATTTTAC GAATAATCC GAAC TTTACTTTCTCTC  
CTCGAAAAAATGCTATAGAAAA GAATAGAAGC GGATCTAAGCTGTGTAAGCTCGGCCAAACTTTAAGAA  
AATCAGAAAATATAGGCAAGGAAAA GGATCGTTTCT GGATAGTTGTCGATCA GAATAGATCC TTGCTAGC  
GCAAACTAAAAACTGTTTCAAGTGCGGATAAGAAAAGTTGATAAAG GGATGGAACCC TTTGACTATCTAA  
GGCATAATCGATACGCG GAATCC CATGCAATGATTGTGTGGGATAGGAAAAACTAGCCGTATTC CCCAAC  
ACAAAA GAATACCGATAAGTCTCCTGAACAAAATGCTGACTTACTACATCACTTTTCCCAATGGAAGA  
AAAAGCTTTCTACTGGGCTTT GAATGGC ATTC TCCAATAAAATTTTAGATAATAAAATCTCTGTGTCTAG  
ATAAGGAGGAGCATATTTAAGATTTCTAATCGCAA ACCCTGAAGAAGCAAATCGCACTAAAGGGCTTGCA  
GCCATATGACACAGTCTCTTACTGAACAAAAGGCTGATGATACGAAAATATTTCTGCTCGAAAAGCTA  
AAAAATCAGAGGGAGCAATTCGCACATCAATGGGAAG ATCC TCTCCTTCTAAATCAGCCACATATCTCCA  
GGCA ACTC CAATAACTGCAGGTATCTGCAAGTCTGAAGAAGAGGAAAGACATGTGTGTAGAAAATCAACA  
GAAGCGTGATC GAAT GTAAGCATAAGGGCCTTTTTCTTAGGGAGA GGGTCTCCAGGCAACATGAAA GAAT  
AGTGTTGCTTAAGAGAGGACAAAAGGCTCACAAACGATTTGAATAAGTGAGGAACTTAGAAAAAGAAAC  
CTGTCGATAAGCTAAG ACTC GAAGCAT GGATCAACTGAGGGAAT TGCAAAA GGATCTTCTGGGTAAATCA  
CTATCTGGCCTGAAATAATAGTAG GGGTACGCTCTTTTTCTTCAAGA ACTC GCTCTGCTGTTCCATAGA  
ACAGATTTCAGAAATGGGGGAGGAGCTATGCATAGCAAAAATTC CAAATCAATAAAGGGCCCTCAGACTG  
CTGTAACGTTTAGATATAGTCCAA ACCC CGTCTTTATAAAATGCTCGTAATCTTCAA ATCC TGCAAAAG  
CCTTCA ATTC CGTTA ACTC TAAAGAAAA ATCC TGATTC AAAGATTC TTTAACCTCAATCATGCGCAATAA  
CGTTAGAAAACGTAGCATAGGGAA ATCC TTCGAAGAGGAAATAGACGAAAGAAGTTCTCTAGACTTATCT  
AAAACCTCTTGATACTGCTTGGTTGCATGCGCATCAGCTATTTCTTCAATA GAAT ATGTTGAGGAGAAG  
GTAGCTGCAAAATGCGTTCCATGTTGATAGGCAAGCCCT GAATAATACGCTCCTCGTAAA GGGT CATTGTG  
TATATGAAAACATGAAGCTAAAA ATCC AGCGTACGAAACAGCCTCTTTACCACCTCTTCGATACGCTTGT  
TCAAGCATAGGCATAGCCGTCTCTGGAGGGAAA ATTC CTGCG GAAT AAGCAGCTTCAACTGACCGCGAAA  
GCAACACCAAGCT ATTC TGACGCTCAACACGATAGGTTTTACATTAACAACATCTTCCCTGAAAGAAA  
AATAGATAAAAACAACAAGGCAAAAAGAGAACAACC GAGTAAGAAGAAATCTTTTTTCGCAAAATCTCGAAC  
ATGGTCTTACGC ACCC TATAAAAAGCAAACAGTCTTCCACAGTTC CAATGCATTAGAAA ACCC TGAGACA  
CCAGTGTA AACCGTCTCTATAGGTTGGTTATCTTCTCGATAAATATCTTGACTTGGTTCTTTTACACAA  
GAAGA ACTTTAGATACAGATAGTGTACAATGGTTGTTATTTT GGATGTAGGCCTTTTTAAGAA GGATCTT  
CTCTGTTTTAAAAAGACG ATTCCTAAAGCTTGCTTCTCGTTATAACAAGAAACC ACCCTAG ATCC TTTG  
TACATCGAACGAAAAGAA ACTC TATACAAAC TTTT ATTC CCTTCTTTATATTTAAGAGT TTTTTTTA  
CTAAT GAATAGTCTTCTCCGACTACAGAGAGAAAT GAGTCTCCT ATTC CATAAAAAAATAACCAAGGTA  
AAATATCTCTTATTTT ACTCCCATCTACAGA GGATCC TTTTATTTCA GGATGGAT TTTATGTCTGTTGTC  
CCACA GAGTCTTGTTCATCTCCTACAACTTCTATAGGAGGCTTAGCGTCTCTTGGCGAGCCTCTCT AT  
CCCTCGCGCTCGATACGAAGTAGGGAGCCTTTTAGCTATTGTTGG ACTCATTC TGACCTTAATAGGGGC  
TGCGAGC ATTCACGCAGTGCTTTTACAATCTGTGGCT ACCC CCGCTATACTTTCCCTTTGTTACGCTTTC  
TCT ATTCGCCCTTTGGCGACAGCTATTTTTTCTGTGATTGTGGG ACTC GCTCTCCTCATAGGAG GGATCT  
TTCTTCTCCCTGTACAGCAAGAAACGCCGCACTC TTCTCTTCGCTATTTAGCTACT ACCCCGTAGA ACTT  
AAT GAGT TTTTTAGATTTCTTTCAGGTCTACCTTTCTTAACTGTTGTAACCTGTA ATCCCTTAGC ATTC

ATTCCTGCTGAAAATAGAGAATCCCCAGCTTCATTATTGTATTCGCGTCATGGGTTCCAATTTCAAGA  
CAATCTCGTATTCACGAATTTCTTCTTGGGCATTTGTAGATCATGATAGCTATAGGCCAACTGTGTATG  
CACCAAACATTCCTGGAGCGTATTCGTTAAGAATCTTGAATTCCTCTGTAGCCCTATGCGCTGTTGCA  
AAAACTTTTCTCTGAATATCCCTCTCCATAACGTCTGGAGGAACCAATATTTCTGTATCAAATTCCTGTG  
ATTTCTGGGTCTGCATAAAGCCCCGATAGTGATACGTAGGCATCTGCTAAGGAAACGTGTGCACCCAA  
GTCTGTAGGAATTGCTTGACAACCTAGTAAATACAAATCAATTGCTTTCTGCAAAAGCATCTCTCGGAAA  
GAAAAATAATCCTTCCAAAAACAAAAACAGCTGAATTTTTTGTATGAGTCGTAGGGAGGCACTATTTTCA  
ATAAATTACAAAAACAAAATACTCTTGATTTTGCATTACCAGAGATAGCTGTGTAAGTCTGCTGAGCGAT  
CTCTGGGTGTTCTCCATCATGTTTTTCTTTTTAAAAATTACCTGAGCTTGATGAACAAAGTCCGCAAGG  
AGTTTATCAAAGAATTCGTTTTCTTAGATAGAATGTAGAGCCGAATGACTAAACATATAAATATTGTAA  
GAACAAACAGGCCAGGCAGAAGGCTGGTAGAAGAGTTTTCCAGAGAAAAGAAAAAGTAAAGAAAGAT  
TCCAGCTCTGCGACCATTAAAGTCAATCCCTAAAGCAACCAATAAAGTCTGCTTGAGCAGATAGCGCAAT  
AAGAGTCGATGCGTTTTCTTACATAAAGACTCTAATATGGACTGAGCGTTTTCTGTGATTTTCATAGAAATCC  
CGCACTCTAATTTGCCAGGCGTCCCAGAAGTACTTTCCATCTTTTTTTCGGAGAGAGCACTATTAAG  
GAATATTTCTTTAAGACTATATTCCTAGAGACAATACTGAACAGGCATTTTTCTTGAGAAGTTCAAAAGCG  
TATCCCGTCTAAGGCATTAGAAGCGGCTCTAAAGAAGTTTTCTGTGGGAACTTCTGACTATTGCTGCTA  
GAGAGGATACCCATCTAGAAGAAGCATTGATAGCTGGATACGAACCACACGATACTCCTTTTGCAGCAA  
TATAGGCACATACAGATGATCTATTTTCATATAAGAGTCTCAATATGATCCGAAACAAATCCAAAAAGGACA  
ATCACAATGTAGCGTTTTCTTGGTACGCAAAGACTGACAGACCTCTTGAAGTAGAGGATCTAGCCATTTTC  
CAATCCCAAACCTAGATTGAAAAGCAATTTCCCCCTCTAATTCACCTCGTAATGCTTCGAAAAGGAAAGCCTG  
ACATTGCTGAGCATAAGGATCTCCTAAACGAATATGCCTTTTGAGGTAATCCGTGTACAGAAAAAGAAAA  
TAAACAATCCCTCACAGCGATCTGCTGAGCGGCTAAACAGTCTCGAATATGCTGTTGCATACACGAGACAA  
ACTGAGGATGCCTCCAAACTGCGTAATCCAAGAAATGGGTTTTTCTGGAAGATGTTGTAAGAAAAATCG  
AATTATACTCCCTGTTACTGCGAAGGTGTAATGTGGGAATAATGGAATCCCAACTATGCTTCCCTGGCTT  
TCTTGTAAATGCCTGTAAGGTTTTCCCGGTGAGTCTCTGGTAAATATCTATGAAAAGGAATAACTGAAGCTT  
GCAATTCCTTGAGAGAGGTTTTGAGCTAGTCTCTCTGTATCTTGAAAATAGGAGATCCCCCTCCTAAATA  
AGCGTATTGTGCGCTACATGAGGAGCTCGACGCTTAGCAATATAAGAAAACAATGGCCTATGCAACACG  
GAAGGAATCATTCTCCTGTAACATCTCGATCTGTCAATAGAGCTTGTAGAAAGCTGACAATCTCCTGAG  
AAGTCTTTGGACCTCCAAAATTGGCTAGTAAATATGTTACCACAGTCTCTTTAAATTCCTTGTCTAAGG  
AAGCCGGGATGTCATTTTAATGGCTTTGTATCTTCTGATCGACGAATTTTTGCCAATCCTGCATTAAAT  
CTTCCAATAGGGAATCCGATCCCTCCTCCTCGTAACACAACCTAAACGCAACCTTCTCATTAAAGAGGTT  
CTGAAGCGATTCGCAAACGTCCTTTATAAGCCGTTTTCTACTAAAGCAGTTGCCCTTATTACAGGCACCAA  
TAACGCATCATAACGCTGAGTAGACAAAGCTTCTAAGGCTACAGGAATATGCTGATAGGAATCGATCACA  
GCATGGGAACATTCGTGCAATAAGAAGGATGAATGAATTTATATACTCCGATCAACTTTCTTCTA  
AATCCGAGAGGAATGATACGGGAATTTTCTAAAACAACAAGCACAGGCCCGGTTAATAAAAACGGGATC  
TGAAAACCTGGTACCGAGCTAACATTTCTATTGAAGGAGAGGCTGAAGTAAAGGCTCCGCTAGTCTTCTTA  
TCATCTAAATTCCTAAAAAGATGAACCAATCTTGGTTCACTATAGAGATATCCAAACCTTCTTGTAAAT  
TAATCTCAGAACTAAATCATTCAAAAGGCGTTAATTCCTGATGTATAAATACCAAATGTTGAGGGAA  
CCAAGTAGCATCCCTCCGACGAGAACCCTTGTTTCTCTCTGGAACATCCGTAGCAAACGCTACAATA  
ACCAAGACTAAAAAGCTTAATGGACGCAATACTTAAATTTCACTTAACCTCAGAGATCAGACTAGATC  
CCGAATCATATTCAGAGAAAAATTTTTATCCACCCACTATGATTACGCTTTGCTTATGTAGAATGAGC  
CGAGTTCTCTTGTGAATGTATTCGAAAGAAAAGTCCCCCAGATTTTCTACGTTTCCGAAGCTCTAAT  
CCCTGTACTAGAATCTCTTGCAGGATGCGTTCTCTAAAAGAAGATCCATCCGGTCTAATAGGCTTT  
GTTGTACAACGTACGATAAAACCTCTTGAAGAAACGCTTCTCCAAAGCATAAGGAGGATCTATATAAAC  
GATATCAAAGAACGATTCGTGTTACCTAAGCGTAGCAACGCTGAACGAACGCTTGTCTCAGGATATGA  
ACAGGCAAATGCTATCTAACAAAGCAAGATTAGCTCGAATTAACGCACGGCTTCAACAGAGGAATCTA  
CAAATGTAGCAGATTCGCGCCTCTACTAATAGCTTCAAATCCCATAGATCCAGATCCTGCAAACAAATC  
CAAAAACCGTGCGCAACTATATGATTGGCACAAAATATAAAAACAGCCTCCTTACCACACCACAAGTA  
GGACGAACAGAGGGATAGAAAAAGTCTTTAAAGACTTCCCTTTGAATTTACCAGAAAAGAAATTTCAACT  
GACAACCTGAGGAATAAAATCAACGTAATCGGCAGCCACGAGAGTGTACTCAATTCCTCGGATATTC  
CAATCCAGGAAAGGTCGCGGCACCTTATGTAAATGCCAAACAAACACGAGAGACGCGGCCATCCATCT  
CTAACAAATTAGAAACTCGCCAGGCGTCCCGTCACTACTAACCGGAGGATAGTGCGTCATAACCAAAC  
ATCTTCTACAGAAGCGGGCAACTCTTTCAGAGCTCGCTCTAAACGACCATATTCCTGAAGAAAAATTTTA

TCATCTTGCTCAGTTAAA**ACTC**TCTGAGGACCATCATGTTGCGTTTCCCAATGGAGGCAAATGTCAGAAG  
**AATCC**CATAAACGA**ACCC**CAACAATTCCTGATGAGCATTAAAGCAACACGT**ATCC**TTTTGAAAGATAATG  
AAGAGT**TTCTGGCAAACGTTTCGCAAGTTTCGAGAAGAAGCTGA**ACTCCAATAATCATG**ATCC**CCACGG****  
**AT**CATGTATTTG**ATCC**CGGGGAGAGCTCCTAAAAAACGAAAATCAACCTGAGCTTCTTCTAAACGCATTG  
CCCAGGAAATATCTCCGGGCAGACAAACAATATC**ATCC**GATGAGACGATATCTCTCCAGTGCTTTTCAAT  
TTTTTGGTGAT**ACCC****ACCC**AAGGCTCACCAAAAACCTCCATAGTTTTCTCGGGG**ACTC**CTAA**GGAT**AGA  
TGTAGATCTGCAAGGGCAAATAACGCATGAAACCTCTTGCTTGATAGAA**GAAT**CAGCTCTTTATTTTGC  
CAACCACTTTTACCTTTGTCAACAGCTCGAAAAGAAAA**ATCCACTC**CTTAAAATACGTAATTATCTG**GGAT**  
**TTT**GCGTTCTCTAGGAACGATGATAATACCATCTCGAACAATAATTCCCATCTGG**GAAT**CATA**ATC**  
**C**TTATGCCCTGCAG**ATTC**TGTAAACGCACACCGTTTCTTATAACAGCAGTTTTTCATCAATAATGGTTTTTA  
T**GAAT**TTACAGTTTTTCCCA**ATCC**CTAAAGGGAAAG**ACTC**AGAACCATAC**GAAT**CGTTCCCATCATGA  
TAGAACGGTCAAACACAG**ATCC**TTGGCCTATT**ACCC**CTCGAA**ACTC**CAACGACACT**ATTC**GAGACCTGGCC  
AG**ACTC**AATCATAGCTCCTTACACAGTAAAGAA**ACTC**GAA**ATTC**TC**GAAT**CTGAAATAATTGCTCCAGGA  
AGATGATTATTTTTACTATAGATT**ATCC**CCCCGTCATCATAACAATTA**AAACCC**AC**GAAT**ATTGTGCGAAG  
GCCGTT**GAGT**CAAAGCCATATTAGCTTCGTAATAAG**ATTC**TATAGTCCC**GATATCTGTCCAATAACCGTC**  
GTACAGATATGCAACAGTTTTCCCGCGATGCATTTGTCTAT**GAAT**CAGCTCTTCCCAAATCATCTCCA  
GTTTTCTTAGAAGCAATTGGAAGAGACAATCTTTACGGAAAAGATA**AAATCC**CCATAG**ATCC**TAGAAA**AT**  
**TC**CCGTGCTGAG**GGAT**CGAGACCAAATTTTTTCATCGCCGTGTTACTTAGACGAAAATGTTTCAAATCTC  
TTCACTTTGAGTTTTCTCATAGAAATCAATCAGTTTCG**ACTC**ATCGTCTACTTTCAAC**ACTCC****GAAT**CGT  
GAAACATCTTTATCTGATACAGGCTGAGAAGCGATCACCAT**ATCC**GCCTGTGCATCGATAGCATAATCTA  
CTATCGAGCGAAA**ATCC**ATATTGTATAGTTGGTCACCTGACAAGATTAAAAAT**ACTC**CACACGA**GAATC**  
TTGTAGATAAAGAAGATTTTTGGC**GAAT**TGCATCAGCTGTTCCCTGATACCAAACCTGACTTCCATCTCGT  
CTTTCAGGGACCAAGAGAT**GAAT**CTG**ATCC**TGCATG**ACTC**CATGGTAAAAATACGCTTTAAATAAGTGTT  
GCTGTAAAGTATAGTAAGGTATTGCCGATAACAAAAATCTTGAAA**ATTC**TGAGGCAAAGGCATGAGA  
TATAGGCACATCAATAAGCTTGTATCTTCCCCAAAAGATACTGTTGGCTTACAACGCCAACAAGTTAAC  
GGAGATAATCGTTTCCCTCTCCTCCGATAAGACAATA**ACTC**CTACGTTATCTCGATAGAAATGCGATC  
GTTTTCGATTGATCTGCTCTTCTTTCGTCCGTCTACCAGCCATCTGTCCC**CGCCACCATAAAAAATAATT**  
TTAAAAATAAATTATTAAAAAAGCCAGACAACAACAAACTGTAATTATTGCAT**GAAT**AATAAATCGATTTT  
ATTTTTAGATGTTTAAAAATAAAAAATTATCTAATTTTGACAAAAACGG**ACCC**AT**ACCC**TTTATAGAGA  
TAAGA**ACTC**TTTTCTG**ACTC**GCCTATGCT**ATTC**CACATCTTGTGGCATACT**ATCCAAGAGCAG**ATTC****  
TTCACCTTGAACCTCCTCTGC**GGAT**CATTTCTTTTTATGGGAAAAG**ATTC**TTAG**GAAT**TTACAGTGAAC  
TAAAGAAAGCTTTC**ACTC**AGATGAAGTAGCGGAACTTTTGAAGACAGCTCTACTACAATTAAGAG**GGGTG**  
GCCTTTCG**GAATATTC**AAACCTATCAAGCC**ACCC**CGATCATACCTGAA**ATTC**TGAT**CGGAT**AAAGAC  
**ATTC**TTA**ATCC**TTCA**GGAT**AACAG**GAATTC**TGTATTGCTATTGCTTTTTCAAACGGCCTAGCAGTA  
AATGCATAGCATCTATTGCTGTTAAACCAGCTATAGCTTGTGCGAACAACCGAACCTTCTCAAGCTCTCC  
AG**GGT**GGTACAACA**ATTC**TTCTTTTCGTGTTCC**ACTC**TTAATCAAATCGATAGCC**GGATAG**ATTC****TGCGA  
TCAGAAAGATGGCGGTCAAGAACCA**ACTC**CAT**ATTC**CCAGTTCCTTT**GAATTC**CTCAAAGATCACTTCGT  
CC**ATTC**TTG**ATCC**TGTATCAATCAACGCTGTGGCCAAGATAGTTAACG**ATCC**TCCGCCTTCAATATTTCT  
AGCTGCACCGAAGAAACGCTTAGGTTATGTAACGCGCTAGCGTCT**ACTC**CCCCAGTGAG**GGAT**CTTCCCT  
**GAAT**GCGGCTGCACAGTATTGTATGCACGAGCTAGACCGTAATC**GAAT**CTAATA**GAAT**CACAAC**ATCC**  
TACCGTGTTCGACCAAACGCTTTCCTTTTCGATCACCATTT**CAGTAACCT****GAAT**GTGT**CG**ATCC****GGTTG  
TTCATCAAATGTGCGAGGCGACGACCTCCCCTCGAACCTGAC**GAAT**CAT**ATCC**GT**CACCTCTTCAGGACGC**  
TCATCAATTAGCAAAACAATCAGCTCTGCGTCA**GGAT****ATTC**ACAGCAATAGCATGTGCAATGCTTTGCA  
AGATTACCGTCTTACCTGAGCGAGGAGGCGCAACGATCA**ATCC**TCGTTGTCCCTTACCGATTGGAGCTGT  
TAAATCTAAT**ACTC**GCTCTGCTAA**ATTC**CTTTTCCCTATCTCCATGATCAATCGTTCATTAG**GGAT**GAAGA  
GGCGTTAGGTTCTC**GAAT**AAAAACAGCTCTTTTGCCTTATCAGGCGTTGAGCCATTAATCTT**ATCC**ACTT  
TCAACAGCGCAAAATATTTCTCTTTTCCCTTAGGAGAAC**GGAT**CGTCCCAACGATGGTATCTCCTTTTTT  
CAAATCGAAACGAC**GGAT**CTGCGCAGGAGAAACATAGATATCTTCTGCGGAAGGAAGATAGTTGTAAGTG  
GGAGACCTAAGAA**ATCC**AAAACC**ATCC**GGGAGAACC**TCCAGGACACCTTCTCCAATCAA****GAATTC**ATCAG  
GACGTT**CAGATTTAGCCTTAACGATTT**CGAACACTACCTGCGATTT**CGTCAGAGAACCTAC****ATTC**TTA**AC**  
**TC**CATATTGCCGAGCTAAAAC**ATTC**AGCTCATTAATGCCATGCGCTGTAGTTTAGCAATCTT**CGTAAC**  
GCTACTGGTTGCGAGGTTTTCTTTCTTCTGTAGCAACAGCACTGTCTTCACTA**ACTTCTTTTTTCCAACG**  
ATAAAGGGCCCTCGCGCTCTTGTGCTCCTTTACCTTTTGTAAAGACCTCGGCTGG**ACTC**TCTTCTTTCAT



ATTGTTCCCTTTAAAGCCTTAAACATTGTTTTACTTTGCGACGAAATTC TTCTTTCGTTCCATTATTC  
CTATGACCACATCCGCTCGCAGGATTTTTTCTTCTAAAGAAGAAAAGCGTGCACACCCGAAGATCGAACT  
GGTGTCCGAACCTCCAGTTTTTTTAAAGAAAACGCTCTTTGCGTATACCCGTATCTGCAGAAATTAATA  
ACCTGATCAAACCAATCCGCATACTGAATCTCATAACAACAGAGGAAATCCACAATAAACAGAGGATACT  
TTTGTTCCCTGAACCACGTGCGCATATTTTTCTCAACAAAACGACACACTTCCGGATGCAAAAATCTCTTC  
TAAAGACAGCAATAAATCCCGGTTACCAAAAACCTTTTCAGCAATGGCCTTTCTACTAAAGATATTCCT  
ATGATTATCTCTGGACCCAAAAGATCAATTATACGTTGACCCACTGAGGTATAAGGAACAAGGAACTAT  
GAGAACTTTATCAGCACTAATTACATAAGCTCCCAAATCTTCAAAAACCTGACACGCCTCAGTTTTCCC  
TGAAGAGGGATCTCCTGTAACAGAAATCTTCAATAAATCTAGCATTCGCCCCAATTTTTTCCAATTAAGA  
CATTCACAATAAAGGAACAGACAGCTCCATTGCAGACTCCATTTTCTTGAAC TAGACTTCTCATCTC  
TTCCAATTCCTTCTGCAGGGACTTCAAATAATAATTCGTCATGAATTTGCAATAATAACGACTTTTTAAT  
CCCTCGACCTCATTTCTGCTGAGATATCCAACATAGCCAACCTTAATTAATCTC TGCAGCACTCCCTTGTA  
TACGCGTATTTACAGCAAGTCTCCAGAAGCAGCAGGCTCCAGGAGAGCTCTCCCAATCGCTCAGAAT  
ACGCTCTCTCCCAGCATTGTGGTTACTTTCTGATTC TTAGCTTACTAGCTTGTCTATCGTCTGTGTAATAAAT  
CTGCTGCTAGAGGATAACGCGCAAAAATAGGCATCCATTAATCCCTGAGCCTCACTTACGCTAATCTTTA  
AAATTTTTGATAATCCATACGCCTGCTGTCCATACACTAAGCCAAAATTC ACTGCTTTAGCCTGATAACG  
CTCCTGCTTCGTAACCTGCTCCAAAGGAACATTGAACACTTGCGAAGCGGTGAATGCATGAATATCCTCG  
CCGAATTAAGGCTCTCTTCAACGTCTCATCCGACTAAGGTGGGCAAGAAACCGTAATCTAG  
AAT AATCAGCAGCTAAAAATAATCATTGTCTTTTTTAACTCGAAAAGCCTCTCGCAAAGATCTCCCTCT  
TTCAGAACGCACAGGAATATTTTGAAGATTAGGATCC TGCAGGAT AATCTGCCTGTTACCGTTCCTACT  
TGGTTAAAAGTTGGATGAATTC GTTGCCTTCCCGCATTGATCTGCTTAGGCAAAGCTCGAACATATGTAG  
ACAACATTTTCTCTGTAGCACGGAACATCAAAATCTTGGGAAT AATCTCGTGACGGTCTTCTAGAGCTTC  
CAGAACCTCTGCCTTTGTAGATTTGGCTTTATCCACAGGCTCTATTC CCAAACGCTGATACAAAATATCT  
GATAACTGCTTAGGAGATTTAATATTAATTCACAGCCAGTTAAATCGTAAATTTCTGAGAACATTCCTT  
CGAGCTCTTTGGTTAGATCTCTATCCAAAACAGCTAATCC TTAGCTATCCAAGGGC ATTCACACGATTC  
CATGGC GAATAACACGGCTTCCAAGGGT TGTCAACCGTCTCAAAAATATCTTTTAGCCCCTTTCTCTCT  
AACTTCACAAATAAATAATTTTTGATCGCTAGTAATTTTGAAGCAAACATTC CGAAATATTGCGCGGGAT  
CACGCGGTAGGCTCTGTACAGGAAGCGAGCCGGCCCC ATTCCTTAGAAAAAACACTGCTTCTTGAAT  
ATGTCCGGATTC CATTAAACAAAGTCTGGAAAGAAATTTTTGCTCCGCC ACTACTAAATGCTCTGCTAGA  
ACCAAATCTGCTGTTACATGAACATCGATCCAGAAT TTCTTAAAGCGTGATTATCGCGTTTAGAGCGGT  
ATCCAAAAAATTGAGTCGCTTTATCTGCAAAAAGTCTTTAAGCAAAGCAATCTCTTGTACACCAGATAC  
CTCTATATAAATAACCTGGTTGGCCCCAGCTAAGGCTACGCCGTGTAGCTGCAAAGAAGGGAGATGCTCC  
CCAGTATAAGCCGCACAATACCCAACTTCTCCCCCTTCAACTGTTCTAAAACAGTCTTCAAAGTTACCG  
GATCTGTACAGTCTGTACCGCAATGGAATCTGTAGCAGTTTCCGAATGCTTTACCAGAGCCTTAAATCC  
ATGCTGCAATAAAAAGGTATTC AACTGCGCTGAATCTATAGCTTGC GGAGAAAACGCAAATCTCAGTC  
GTCAACGGGAACGCGAGATCCATGTGTAACGTGGCAAGACGTTTACTCAAAGCAACGCTCTCTTCTGAT  
CTTCTATCATTTGTTAGTTTTTGGCAGATAAACGTTCCGTATTAGCAACTAATCTCTACTGATTGAA  
CTCTTCAATAGAGCTTGAGCCTTTTTGGGACCACAACCAGAAAACGCCAGGAATATTATCGGAA GAATCT  
CCCCTAACGCCAAGTAATCTGCAATCTGCTCCGGAGGC ACTCGAACTGCAATAGTACTTTCGTTATATT  
GGATTTCTGTTCTTTCCAAGGAT TAAATACGGAGACACGGCTGCTCACCAGTTGCAATAAGTCTTATC  
GGCAGTGCAATAACACTTCAAACCATCTGCAACCGCTTTTTTAGTGATACTAGCAATCACATCATCA  
GCCTCTACACCCTTTTCTTCCAGGCACGAGATACCAAGTAATTCACAATATTGCTTCACTAAACGAATTT  
GCTCTGGAAGATCTCTAACTGACGATCACGGTTACTTTTTATAGTCGGCATAAAGCTCTTGACGGCTCTG  
CTTATTATTGGGACCATCAAATACAGCAACCACGTATTCGGGAGAGAGGTCTTTGATCAACTTATCTAAA  
GAGC GAATGAAACC GAATACCGCTTGCCTACTTTCTCCATTTGGACCTCGCATCTCAGGAAGAGCAAAAT  
ATGCCCGAAAAACAAATCC TGAACATCTAAAACAAAAGTTTTTTCATATGCACCGATCCAGCCTCAAC  
CCATGTACCACAAAGATTTTTGTTGCTGATCAGGTAAAGCCGTCACCTTGAGTTCCCTGTTACAAGCGG  
GCTATTACTTAGATAGCTAGAAAAACGTTTTAAAAAATGGCCAGAACCCAACTGACTCGATAATTG  
TCTTTGATACCACAGGCTTACGCCAGTTCTTCTAAAGCTTGTCTT GAGTTTGATGATCGCATCCACCA  
ACCCTTCTTCCAGAGCTTGTCTCGCAATAAATACACGGGCTCCCAAACCTTCGTTAGTTTTTCTTAGA  
CAGCTTCGAACGATATTTAACAACATGATCCACAAACTGTTTCATAGAAAGCATCCACTATCCCTGGCGC  
TCGGCGTACTCTTCTGTCCATGAAGAAAAAGGATTTAACGGCGCTTTGTCTCTCCCGCTGTAAAGAA  
TAGCAGTTTCCACGCCATGTCTGTTGTAAGCCTTCTTTAACATTAATAATATGGGCCGAACGTACTCTAT

TGAACCAATCAGAGA**ACTC**GAAAGTGGTTCCAATTTTATCGGCAATACAAGCAACATAAT**ATCC**TCCGGAA  
GCACA**GAGT**CCAGATACAAAGACGTGGACAG**GGATTC**CCCCTGTTTCTTCCAGAAAGAG**GAGT**GTTGCGC  
AC**ATCC**GATCAATTTCAAAAACCTCACCACCAGGACAATCTATTTTGACTAAG**ATCC**CTTT**ACTC**TTCC  
TTTGTAAGGAGCTTCATTTAAAGGCTGTAAAGC**GGAT**TGTAAACGCTTTCAGCGCCACTGCTAGCGATA  
ATAGCATCGTTAATATCAATCACTGCAATAATGGGAGCAGTTTCCCAAGCTCTTGAACA**ACTC**CTTGAG  
CGTTGGGGAAATTGACAAACAAA**ACTC**CGTCTCCCGCCCCAAGAACAGAGGCCGATAGGACAAAAAT**GAA**  
**TCC**GGCAGCTCCTATCACACCTAAAAACAAACCGCAGGC**GGAT**AAAAACCTTTTAATAAAAAATCGAAAA  
AA**ATTC**TTTCATGCAA**ACCC**TAATAAATCTATTAATCGCTTTTAGCATTAGAAACAAAACGGTACTAAAAC  
AGGG**GGAT**TATAAAAA**GAAT**TTTTTAAATAAAAAATTAAGAGACCTG**GAAT**ACTAT**ACTC**CAGGCTTTTTT  
CTTCTCAAGACTATAAAGTTGTTGCAGGTTCTTCTCGAG**ACTC**AGCATCTACTAAAGAAGAAGCCTCTCG  
CTCTTCTGTAAAAATCTTCTTTCAGAAGCATTG**ACTC**TAACAA**GAGT**CTCGGCTTGGCTGTGT**ACTC**T  
CTACCTAACCAAGCGATCACAAAG**ATCC****ACTC**CCTAAAGCCAGCAACAACACAATCGTAATCGCATTTA  
AGCTAGCTGCAACGGACGAGAAGATGATCAGCAGTCTTGGTAAACTAAAGAGCCCCCTGACTTCCCT**AC**  
**TC**TGGAGAT**ACCC**CATCAATAGCCGCCTTACC**GAATTC**TTCTCATCATCTTCCAAAG**GAAT**AAACGCC  
ATCTCCTTGGTTTGTATCGAAATAGGTGAACTTAATGCTCTCGAGAAGACGTTCTGAACACCTCCTAACC  
AAGCAGTAAGAAGTAGCGGAGAG**ATCC**C**TAAG****ATCC**CGCCAAAAATCATAGC**ATCC**CCTTTTACAGCATA  
GATAGCGCCAAAGAACAAGGCTCCTGTAATCAATATGGTTAAAG**GGT**ACCAAGGCGCCAACAGTCC**AT**  
**CCCA**ACGGCGAATAGTTTGTCCAGCAGCGAAAA**ATCC**CTGCCAAAGCTGAGACG**ATTC**CTGTGAGCGTGC  
TA**ATCC****ACTC**CATATA**GAAT**TAA**ATTC****ACTC**GAGAAGCATAAA**ATCC**GACAGACTTGGTCTTTCCAAAC  
GACTTCAAAAAGGT**GAAT**GACTAAATGTAAGA**GAGT**ACGACGACGGCGATGCCTAATAGATAGCGGGAG  
CGGAGGAGAAGAGCGAAGAGACTTTTTGCTTTTGCCTTCGACCGCTTTTTTCTCTTTCTTAAGCTGAGCGA  
CCGACATTTCTGTGCCA**ACCC**CTCTTCTAACATTGACGTCTC**ATCC**ATCAAGCGATCTAACTTCTGATA  
TAGATAGAG**GGAT****ACTC**CGCCGGCCAGCAGATAAGTA**GAGT**GATATTGAGCAACATCTCATGCCAA**GG**  
**TC**TACGGCCATAGGAAGGCAATTACAGGACTTCTACCGAGCCACAAGAAACCTCTCCAGCAAAAACAG  
AAGAGAGTTTAA**ATCC**AGTATTAATAAGAGCGTAAACCGCCCTGCTTCGCGAAC**ACTC**GTAATATGGTT  
GGCT**ACCC**CCCAAAACA**GAGT**AGACAAAACCTACGGAA**ACTC**CATA**ACTC**AGACATCACATAATACAGGCTA  
TAGCTCCAATATTGAACCATCACTACAAAACCTCTTCCCCCTGGAGGTAAGATGACTGTAGTTTGGCCG  
CCAATTTATTTAGATGCAGCGCATCTCCTATG**GGAT**AAATCACTGTGGCGAACACGCAAAAAAGCCTAA  
AAAACCGCCGACTAAAGAGATAAACACGGTACCTCTT**GAAT**AACGTCG**ACTCATCCATCC**ATAGATCATG  
GTGACGATAACGGCCCCAGGGACA**ATCC**CCAGACTTTCAAGAAAGGTATGACTTCCGCCCTGCTCTAG  
**ACCC**GACTAAAACAAG**GAGT**CTTTCGTGGTCTTTAATAAAGCGTAGTTAACACCTACAAAAAAGCTAA  
AA**GAAT**AA**GGGT**ATAAATTTAGAG**GAATTC**TGACCTGTATATGGGAAAAAGT**ATCC**CCTGAACCTCGAA  
AAG**GAT**TTTACCTCGGAAGACATAC**ACTC**CTTCC**TAAT**TTAATAAATTTGAAGACTTTGGGAAAAATTT  
TTGTGATGCGAGGAACCTCGC**ACTC**TGTTGAAATTTG**GGAT**AATTA**CT****GGAT**GCTTGGCAATGCATAATT  
ACAAGATTTTATGAA**ATCC**AGGGAAC**TAG****GAAT**ACCGCACTTGTCTGCTAAAAT**TC**AGTTCTT**GATC****ACT**  
**CC**CGCTCTCTTTTCTTTGGGCACCT**ACTC**CAAACAGTGCCGCCTATA**ATCC**AAA**ACTC**CTCTCTAAAAG  
TAGAGAGCCCCGA**GGAT**CACTAAGGGAGCTAACC**AA**GAAGCTGGTATCTC**ATCC**CTATCGTC**ACCC**CAA  
ATAAAATAAA**GAAT**TGAACAAC**TG**AAAAA**ACT**TTCCAAAAGACAATGCTCTGTAATCAT**ATCC**CTT**CA**  
**TCC**TCGA**ACCC**AG**GAT**AGATAGAA**ACCC**GAAGAACACTAAAAAAATATCTCTAGAAAAAATCAGAGCGAGG  
TGCGTAAGCCCTAGAG**GAGT**TTTCCCAAATAGAA**ACCC**CCACACAGATTAAAAAAATATTTTATCTGTGG  
CAG**GGT**CA**GAAT**GGAGCCCAAGCGACTTGTGGCATTGTAGCGTCTAGCCAGATAGCCATCTAGAATC  
GCTAACCATCGCAGCAAAGATAACCAACAACCTTGT**TATAATTC**TCCTTGGCAGAAAAGAAGGGCTAAC  
CAC**ACCC**TGGACAAAGAAAGGAGATTACAG**GAAT**TGCTCTATAACGTTG**ATTC**GGAAAGCTTGTCTT**GAAA**  
**TTCT**TAGCCTCCAGCGCAATGACACATATTATGAAACATAGAC**ACTC**CAAAGCAAGCAGAG**GAGT**TTAGC  
TATGTTCCCGCCATTTCCCCAGCTTATCAACAAAAAAAC**ATTC**AAACAAACAAAAATTT**CAG**AAAACAC  
AATGTAAGAAACGGAAAGAGAG**GGATTC**GA**ACCC**TCGGT**ACCC**TTTAAGGGGTACGGCTCCTTAGCAGG  
GACGTACCTTCGACC**ACTC**AGTCATCTTTC**CAAT**GAAACAACCGGCCAAAAAGCTCCGAAG**GGAT**AAAT  
TTACACGA**GAGT**TTTTTTTTTTGAAAAGCATAAG**GAGT**CA**GAATCC**TTGCTTCC**TAAAA**AGAAGTTGACTG  
TCTAAA**ACCC**CGTCTCTAACCAAGAAAACGATATTTTTCTTCCCC**TCCCT**TTTCTTGA**GGAT**AT**AT**  
**TCC**CTAT**ACCC**TAACCTGGCCGAGAGAGCTTCTT**TACCA**ACCATAAAAA**TAATCC**CTAACTATGGCG  
**ACCC**AGACAAAA**ACCC**CA**ACCCACTC****AACTC**CTCTCTTCT**TAATTC**TAAG**GAAT**CTGAAATGATTG  
TGCTG**GGGT**GTATGTTGACCAGTGTCAATCATTTGAACCTTGGCTGCCAACCTTCTT**CAGGA**AGATGATTT  
CTACTTCTTAGAGCATCGTATTATTTTTCGTGTGTTGCAGGACGCTTTCAGTCTGACCGCCCAT**GGAT**

CCCATCTTACGGGAGAAGAACTCAAACGCCGAGATCAACTCAATATCATTGGAGGCCCTCTTATCTAA  
TCACTCTCTCTGAATTTGCGAGGACATCTGCCTATATTGAAGAATACGCAGAAATATCCGCTCCAAATC  
TATCTAAGAAAAATGATTC AAGCGGCCAAAGATATCGAAAAGAAAGCCGCTGAAGAGCCACGTGACGTC  
ACTACCGCTTTGGATGATGCTCAAACTTATTGTTTCGCATAAGCCAAACAACCTAAGCTTACCCCTATG  
TCCTTGTTCAGACAAACTCAAAGGAGTTGCTTCTTCTAAAGACAAAATCCTTACTCGCTTTACAAGA  
ACGCCAAGAAGCTTTCCAAGCAAGTGCTCATGACTCAAGCTCTCTATGCTCTCAGGCTTCCCCACTCAT  
TTCTTAGATCTAGATAGAATGATTAGTGGGTTTCAGCCCCTCTAACTTGATCATTC TTGCTGCTCGTCCTG  
CTATGGGGAAAAGCTTTAGCTCTTAACATTGTAGAGAATTTTTGTTTTGATAGCCGGCTTCTGTAGG  
AATTTTTTTCATTAGAGATGACTGTAGACCAGTTAATCCATCGCATCATCTGCTCGGCTTCCGAAGTAGAA  
GCTAAAAAATTAGCGTGGGAGATATTTCTGGTAGAGATTTTCAACGCGTGGTCTCTGTGGTAAGAGAGA  
TGGAAGAACATACTCTACTCATAGATGACTACCCGGGTTGAAAATCACAGATCTTCGAGCACGCGCAAG  
AAGAATGAAAGAAAGCTACGATATCC AATTTCTAGTTATTGACTACCTACAATTAATCTCTAGCTCTGGG  
AACCTAAGAAATTC TGATTCGCGAAACCAAGAAATTTCTGAAATCTCCA GAATGCTTAAAAATTTGGCTC  
GAGA ACTCAATATTCCTATTCCTCTGCCTCTCTCAATTATCTAGAAAAGTAGAAGACAGAGCTAATCACAG  
ACCTTTGATGAGCGATTTAAGAGAAAAGTGAAGCATTGAACAAGATGCTGACCAAATTTATGTTTTTACTT  
CGCCGC GAATATTATGATCC TAATGATAAACCTGGAACAGCAGAGTTGATTGTGGCTAAAAACCGCCACG  
GCTCCATTGGATCTATAACAATTAGTTTTTGA AAAAGACTTTGCTCGATTCGAAAATTTATGCTGGCTGTGA  
GT TCCCTGGAT AAACAAGTTTTATTC CCAAAAATTGACAGCCATTGTAAACTTCTTCCCATCGCTGGTGA  
AAGCCGGCGATACACTTTGAGAAAAAACCTATGAGGATCGGGT GCTTGCTCGATTC TCCTAGGCATTAG  
CTGAGTCTTTTTCAAAAGACTTACCAATTATTC CTGCGTAAACCATTAAGAAGAAAACCATGTCATCTGT  
TAAGAAAAACGAAGACTTAAGATCGCCAAGCATAAGCGTAAAAAAGACGTCGAAGAGATCGGCATAAA  
AATAGATAGTTAAATGTTTTGGGT TCTATGTGGACGTTTTCTGTTGATTACGATGTGATAGTCATTGGCG  
CAGGACATGCTGGTTGTGAAGCTGCGTATTGTGCTGCTAAGATGGGAGCGTCTGTCTTGCTTCTGACCTC  
AAATTTAGATACTATTGCAAAA ACTCAGTTGTAATCC TGCTGTAGGAGGTATCGGTAAGGGACACATCGTC  
CGAGAAATCGATGCTCTCGGTGGAT TATGGCTGAAATTA CTGATCTATCAGGAATTC AATTC GAATCT  
TAAATCAAATAAAGTCCC GCAGTACGCGCTCCTCGCGCTCAAGTTGACAAAACAGCTGTATCATATTC A  
TATGAAACGCTTGT TAGAACAGGTTCTGGGCTGCATATCATGCAGGGAACAGCTGAGGCACTTTTAGAC  
AATGGCGAAAAAGTTTTAGGAGTCTCTACAAAAGAAGGTTGGCCCTATCTAGGGAAAACCGTTGTTTTGT  
CTTCTGGAACTTTTATGCGAGGACTTATTCACATTGGAACCCAGA ACTTCTCTGGGGGACGATTGGGCGA  
TGCAGCTTCTTTAGGTCTTTCTGAAGATTTAAAACGCTTAGGGT TCCATTAGGACGTTTTGAAAACAGGA  
ACTCCTGCTCGTCTGTTAGCCTCATCTATTGATTTTTCTGTAATGGAAGAGCAACCAGGTGATCATAACG  
TTTTGTTTCGTTTCATCGAAACGAGATGTTTTGTTTCTTACATTGCCACAGTTTTCTTGTACATTACTCATA  
CACTGATCAAACAAGATCTTATAACCAAAAATCTGCATCGTCCGCTTTGTATGGAGGGC GAATCGAA  
GGAGTTGGGCCACGATATTGCCCTCTATTGAGGAT AAAATCGTGAATTTGCAGATAAAGACC GCCACC  
ATATTTTTATTGAGCCTGAAGGACTTAACACACAAGAAGTTTATGTGAACGGTCTCTCTACATCGATGCC  
TTTCGATGTGCAGTACGATATTATTC GCTCGGTTCTGGAT TAGAAAACGCGATCATCACTCGCCCTGCC  
TATGCCATAGAATATGATTATGTT CATGGGAACGTTATTTTTCTTCTTTA GAATCC AAACATAATCGAAG  
GACTCTTCTTGTGTGGGCAAATCAATGGCACAACA GGATACGAAGAAGCGGCTGCACAAGGCTTGATTGC  
TGGAGTTAATGCCGTAAATAAAGTCTTACGCCGCTCCATTTGTTCCGAGCCGTCAAGAGTCTTATATT  
GGGGT CATGTTGGATGATCTCACTACCC AAGTACTGGACGAGCCTTATCGCATGTTCCACAGTAGGGCAG  
AACATCGTTTTATTACTGCGGCAAGATAACGCAGGCATGAGACTCTCTCACTATGGGC ACTCCTTAGGACT  
ACTGTCTAGCGAGCGCTATGCTATGTTCCAAGAACA AAAAGCTTGTATAGAACAAGAAAAGAACGGTTA  
TCTAAGACTTTCCGAAAATATGGTGATACGGTAGTCCCATTAACCA GAGTTCTATGTCGTCCCGAAGTTT  
CTTATCAACAGCTTCTTACAGAAT TTCCTGCAGATGTTAGAGATTTAGGTCCTATTTGATAGGCGCTTCTTT  
GGAGATGGAGATCAAATATTC CGGCTATATCTCCCGACAACAACGTTAATTC GTAGTATGGAGAGATCC  
GAAAATATTTCAATTC CTGAGGATATTGACTACCACAGCATCTCAGCACTTAGCTTAGAAGCTAGAGAAA  
AGCTTTCTAAATTTACTCACGCACTATTGGGTCTGCAGCTAGAATTTCTG GGATTTCTGTGGCAGATAT  
TCAAGTGCTCATGGTCTCTTTGAAGAAAGATGCTCATTAATTGCGTTTTTTGTTCAATTGCGAAGGGCTGCC  
TATTTTTAAACAGCTCCA ACTCGAAGAAGCTCTTCTACGAACCTCTTCAAAAATTTCTGTCTGGTAAAT  
ACACATCTTCCGGAAGCTGTGGTATTGGGTATTTCCCGCAAGCTGAACGAGATCTTACGCTAGAACATT  
TAAAAGAAGACGGAATCC CTATTATCCGTCGCTATAGCGGCGGAGGGACTGTTTTTTTT GGATGCAGATAG  
CTTGATGGTCTCCTGGATATAAATTC CCCTACTCATCTCCATCTTCAAAAGATCTCCTGCAATGGACT  
CAAGATATTTATGCTCCTATCTTCCCTACAGGATTTAAAATTACAGAAAATGATTACACTTTTTTTGGATA

AAAAAATTGGCGGGAATGCGCAGTACATCCAAAAATATCGATGGGTTCATCACACAACATTTCTTTGGAA  
TATGAATCCTAAAAAGCTTGCTCGCTACCTTCTACTCCTGAAATTC AACCTTCTTATCGACAAAATCGT  
TCTCATGATGAATTTCTAACCACAATCTATGAACTTTTTGATTC AAGAGAAGATTTCTTATCC CAGTTAA  
AGCAATCTGCAGCAAGTAAGATGGTGTGGGAACAAGTTCTATACAAACACTCACTCCGATGCTCAGCCT  
TCCTCACCGAAAAGCTACACAAATCC TATAAAAAAAAACACCC CCCTCTGCACGGTGCAGAGGGGGCTT  
GCACAATCTCAAAAACACTACGCTACAGAGTTAACTACTTCTGTCTTAGCAAAGAAATAGCTTACCTCAA  
TAGCGGCATTCCTAGACTATCGGACCCATGAACAGCATTACTCCTATCGATTC TCCGAATAAAGCTCG  
AATCGAACCTTCCGCAGCTTCTTTAGGATTCGTTGCTCCCATCAACTCTCTGTTACGGGCGACAGCGTTT  
TCCCCTTGCAGTACCATTACTACAACAGGACCAGAGATCATAAAGTCTACCAGTTCTTGGAAAAAGGTC  
TCTCTTTATGAACAACATAAAATCC TTCTGCCTCTTTTACCGAGAGATGAACCATTTTCATGGCTGCAAT  
TC TTAGCCCAGATTTTTCAAAAATAGCAATAATTTCCCCTATATGAGCCTTGCCTACA GAATCAGGTTTG  
ATAATTGATAGAGTTGTTCCATGTATTC TCCTTGTGCTCTCTTTCTCTGTGCCATAGCACGCACAA  
GC GAGT CATCTCTCCGTAGAAAACGAAATGAGGCTGATTTTCAACACAATTGTAAGAAAACATAACTTA  
GCTCAGCATTTTCAGAAATACCTGCGAAA GGATCC CTGATTTCTAGCTTTTTCTTAATGCTATAGGAAGC  
AGTTCGGCTACTGAAGCTTCTTCAGATAATTC TTTTACAGCCTCGGT CATCATACGATCTGCTGCAAGAC  
GAGAGAACCC AAGATTCATTAGAGCTCCGATTCCTTCTTTGAAAAGAA GAATTC GCTGTCGAGGAAGGAAC  
TACGGGTTCCTCTAAGTAAAGGGGCATCAAAGTAGGAAGTTTTTGTTTAAGATCC ACCATCAGCTTTTCT  
GCTGTTTTTTTTCCCTATCC CAGGAACAGACGCAATAGCTTTCACATTTTCTAAGCGCGCAATAGAACACA  
ACTC TTGCAAAGGGAACATATTTAAAATAGATAGTCTGTTTTAGGGCCAATACCAGAAAAAGAAATTA  
TAAACGAAAACACTCCTTTTCAGCGGAGAGCTAAAACCGTATAGAACGTGCTCAGTTTTCAC GAATGACG  
CTATGAACATAAATCAGCACCTCTTGATGCATAAATGCGCGCAAATCTACTAAAAACGCTCAGAAAGCA  
TAATAGCATATCC TATGCCGAAGCTTTC AATCACAACATAAGACCCATCAATATGAGTCAAAGTGCCTTT  
AATATACTC GTACATGAGTGCCTAATTC TATCTGTTATAACAAGAGTCTTCTTTAAATCCTGATAAGGAGC  
GAGATGTGCGTGGCACATGGCTAAAGCAAAGGCATCCGCTATATCC TCATTATCTTCTGCTAAAAGATCT  
GGAACACGCAATAATTTGCTCACCATTAAGTACCTGCTTCTTAGAAGCATTGCCTTT ACCC ACAGCAG  
CTTTTTTAGCCGATTTGGGAGCGTATTC AAATACAGGGACATCC TGTAAGATGCCGCTAATAATAAAAC  
ACCTCTAGCCATTC CCAGCTTAATGGTACTTTGG GGATTTTTATGGACGTAAGTCTCTAAAACAACA  
GCTTTAGGAGACTC TTGTTGAA GAAT TGTGGAATCTCTGTAAACAACGTTTTATAACGATGAGCCAAAG  
CTAACTTCTGAGAGAGCTTAACCTTTCCAAAACATATGT GGGTGAAT GTGATATCGATTTTCTACCTTAAT  
CAACGCGTATCC ACAACTAACGTTCCCT GGATCTATCC CCATGATCAAATCAGCCATGCCTTTCTTAACA  
CTC GCGTCTTGTCAATTTCTATATTTGTGCAAATTTTACACAATAAAGGAAA GGGT TACTAACAAAATCA  
GGAATCTCCAAAAGGCTTTACTATCAAACCTCTCTTTTCGCTAAAAGCGATCTATTTGCTCTTCAAGT  
ACTCGAATCTTATGTTTATAACATAGCCTACGGCCTTCGCTGACTTCCATCTGCTGAACACTTCAACTA  
AATCACGTTTCAACTC ATCGATCACATCATTTTGTATGACGCGCTTGTGTAATTTTCTGCTAAACGATT  
TTGCAACCAATGATTTTCTGCCTGTAATTTAGAAATCTCTTGTGCTGATTTGCATTTCTTGAGATGCCAAT  
TGAGATTTAGCTCACAGACCTGTTGTTCC ATTC TGCTAATGATGTTCTTT ACTC GCAGATTGGATTT  
GCATCTGCTTCTGTTTCTAAGCAAATCTTCGCTCATTTTGAACAAACACCAAACAACATCTGACAAGT  
ATTC TCCC ATTC CACAATATCA GAGTCTTTCCAAAGACAAAACAGCTGAAGCATGGAACGA GAATATTC T  
TCGTATGATCAGGAGAAGTAAATGCACGAACTTTGCGAAACCGTAACAAAGACAACAGACGTAGCTTAA  
CTAAAGACCAAAGCCACATCAAAGAGAT ACCC CAAGTTAAATAGCTCTCCTCATCTATAAATCAAAAAGG  
TATTATGCTCTCAAGAACCAGAGAAAAAGATGTGCTCAGAACAAG ACTC GAACTTGCACGGGCCAAAGC  
CCAAG GGATTTTTAAGTCCCTAGTGTCTACC ATTC CACCATCTGAGCAAAAACGACGAGG ACCC TAAAGAG  
TCCTCGCCACAGCTTTACAAGAAGTTCTAGCACGCACGACTGGAAAAGCTACAAT GGATTGTATGTTAAA  
GTTCTAAAAAAAAGCAATGAACTTCTT ACTC TTCTGAAGAAATACTGTCATGAACAG GAGT TTCTTCTAA  
TGAAAGACTTGGCTGCTCTTGAG ATTC TTCAGCAGTTTGATCTTTTCTTTAGTAAAAACAACCGTGTCC  
TCATCGGCTAAAATAG ACTCAATAACATTTGCAACTTTTCGCTGACTAAAGCGTTTAGAG ACTCATTTAAAT  
CCACTGAAGTCACAGGCTGAG ACTC TTCCTC GGGT TCTTCTGGACCATCAGAAATCAATCGAGT AGGAGG  
AGGAATCAAAGAAAACCGTGCCTCACTGAAATCGCCTTCCCTCAGAAGAGG ACTC TTGCAAAC ATTC CTCT  
GCTACGGTGTGATCATCTCTTGAGAAG ATCC AACAGCATCGGCAATCTCTTTACTATTTGACGACGTC  
CTTGTTTTTTCTT ATCC TTCCATTTCTC ATTC TTA ACTC TTTTCGCTCTCTCTTTCTTAGACATTTGAGC  
TACAGGTGTAGAAGCGGGAGCTGCAACAGTAGAGT CTGCAACTACCTCTTCTTTCAGAAACAATCGTATTA  
TCTTCCGATACAGAAACTATTGGAGCCACCTTCGGCATCTTTAGTAAAGCTTCCC GACTACCAACAATCT  
TGACTC CACGATCTAAACCAACAGCTTTAAGGTTGATTTTAGC ATCC CGGAT TTCCATCACTTCATAATC

AGATGCTGGCAGTAAAAACGGCTTACTATGATCACAATTACGGAAAAACTAGTCCCTCCTAAACGGACA  
ACCTCTATAGCCTCAACGACAAAAGGATCTTGGGACAAGTGTTTCGAATTACGAATGGATAACTTATATC  
CTTCTCTAGATGTAATAACAGTCTCTATGACTGGATCTCTTGTAATAACACGAACGAACCTTTATTTAG  
AGT TTTCTTGTACGTACTCTAATAAATCCACTATGCGAGTTGCATAGCCTATTTTATTATCATACCAAGC  
TACCAATTTGAAAAATCGATCGTTCAAAGCAACCCCGGCTTGAGCATCGAATATAGATGAATACTCACAG  
CCAATAAAATCAGAAGAGACTACAGCTTCTTCCGTGTAGTACATAAATATTCATTCATGCTCGTGTGTGCTG  
CATGCTTCACAGCTTCACAGATAGCCTCGTACGTCGTGGCTGAGCTCAACTTAACAGTTAAATCTACTAC  
AGAAACATCTGCTACAGGC ACTCTAAAGGCCATTCCTGTTAATTTTCCTTTAAGCTCAGGCAAAACACAAC  
CC TACAGCTTTAGCAGCTCCTGTGCGAAGCCGGAT AATATTC TGAAAAGCTCCTCTACCCCTCTCCAAT  
CC TTACGAGAAGGGCCATCAACCAC ACTCTGCGTAGCTGTTGCAGCGTGAAGTGTGTCATTAGCCCTTC  
TTCTATACCAAAATTAATCCAATAGAACTTTGGCCAAAGGAGCTAAACAATTGGTAGTACAGGAAGCATT  
GAAATGATGACGTCAGCTGGGTCAAACCTGCTGATGGTTAACTCCATAACAAACGTAGGGACATCGCCTT  
TCGCAGGAGCTGTGATCAACACTCTCTTTGCTCCA GAGTCCAAATGCTTTGCGAGCATATCCCTATTGAC  
AAACAATCCAGTACTTTTCGACGACGACATCAACATCCAAATCC TTCCAAGGAAGCTTTTGAACGCTTTTT  
TCCGCTAAGAAACGGATCTTTCTTTCTCCATAACCAACATCCATCCGAAAATGTTGCTTGAGGAGCGA  
AAGATCCGTGTGTGGAATCATATTTAAATAAATATGTTAAAAGATCTCCTGCGACTAAATCATTAATAGC  
TACAACCTTCTATGGGAGAATTCCTTTTCAGAATCTGTCTTAAACTAATCGCCCAATCCGTCCAAAACCA  
TTAATCACAATTCCTATTGCTAAATCCAGGTAGTCAAGTGTTCGAAAAATTAGCATCACTATGCTAAA  
AATTC TATGATACACTTTTGGAGCATTATCACCAACCC TATTTTGAACCTTCAAAAATGCGCGTATACCCGC  
CATTTCCTCGAAGAAAACCTGGTTGCTAACACATCAAATAACTTCCCAATGACTCTTCTATCAACATTATA  
AGCAGACAAATCTCCAGCTTTAACTTGGCGAGCCTCTTTGCTAGTCAACGTATTATATCTGACCATAAGA  
CGCCCTACAGCTAATCTTCTTGCAGCTAAGGTATTTTTCTTAGCTAAAGTAATCATTTTTGTCTGCATGCC  
GACGCAACTCTTTGGCTTTAGGCAATGTAGTCTCTATTCCTTTTCAATTGTGAATCAAAGACTTCAACATATT  
AGCCAACATGCAACGGTTATGAGACGAAGTACGACCAACCC TAAATTTTTTTCTAGCGTGTTCATATCT  
CTTTTTATCCCTTGGTATTTTTACTCGACCGAATTTTTTCGGCATAACCACTTCATTTTTTCTTTAACGTT  
ATCCAGACCAACACCAAACCTGGCTGAGGTCCATGCCTAACTCTAATTTTCAATTTCTTTTCAAGTTTATTC  
TTA  
ATCTCGCAGAGAGACTTCTTCCCGAAATTTCTAAATTTGTAACAGACGAGGCTCTGGCATAATTACCAATT  
CCCCATATCGTTTCGATATTGGCATTAGATAAACAATTTGTAGATCGTACAGAAAGTTCTATCTCATTAAAT  
GCCTAAAACCAATTTATGAAGAATATCGTCTTTGTTTTCTTTCTCTACAGAGATTGCTTCTTCAAAAACG  
ATTC TCTTCTCGTCCATTTTTTCGAAAACAGAAAAATGCTTACTCAAATCTGTGTAGCAAAAAGCTACAG  
CTTCTTTAGGAGCCACAGCACCATCGGTTTCCACTTGCAACACTAAACGATCGAAATCTGTATCTTGTCC  
AACGC GGGTGTCTTCAACAAAATAGTTAACAGAACAAACAGGAGAGAATGCCGCATCTAAAACGATCTCA  
TTCATGCCTCTTTCTTCAAGAACGATTC TTTTCAGAAGGAGAGTATCC TCTACCAAAAAGCAACTCGCAACA  
TAACCTCAAGTTGCATTGGACGCGTGACCGTAAAAATACGTGCTCAGGATGACCGCTTCAAAAAGTTCC  
TTCTGTAGCAAATCTCCTAAAGTAACTTCTTCTGCCACCAGCAGCAGCTAAATCGGATGCATCAACA  
GAAATCGTAGCTCGTAACTTTTGGAGCATCTTCCACCTTCACAATCTTGTAGA GGATACTTTTTAAGCA  
ACGAACCTTTCAAATTC AAAACGATATTGGTAACATCTTCAATGATCCCTCTACCGCCATATATTCGTG  
CAAAACTCTCTGTATAGAGAAAGAGACAATAGCAGGAGCTTCCAAGCCGATTAACAGAGCACGTCGCAAG  
GCGCTTCCCAAGGTGTGCCCCATCCCTTTTTCCAAGGGATCTGCAACAATCGAGCTACTTTATCAATGC  
CGCCAACAGCCCCCTCCACAGGAGACATCTTACCAGATTCAGGCAACTCAAATTTGTTATAAAGTAAATT  
GTGTGAACTATCCGACATCCAAACTCTTAGCTATAACTACACTCTTCGTGCTTTCTTTGGTGCACACC  
CGTTATGAGGGACGGGAGTTTCATCTCGGATAACGGAAACGATAAGCCCAGAAGAAATTAGCGCTCGCAC  
AGCAGATTC CCGCCCTGCACCAGTTCCTTTTAAGCCTACTTCAACTTCTTTTAATCCAGAACTCATAGCA  
GCCTTAGCAGCATCTTGAGCGGCAACCGTCCGAGCAAATGCTGAAGATTTACGAGAACCAGAAT AACCAA  
CTTTCCAGCAGAAGCCCATGAAATCACATTACCAGCAGGGTCTGTTATGGTTACAATTGTATTATTTAAA  
AGTAGCCTTAACATGGACAACGCCGAAGGAATGTTTTTTACTTGTTTTCTTTTACGCCTCTTTTTTGC  
GCTTGATTTTTTAACCAAAACACTCTCTCCTAAAAATATTATTTCTTCTTACCTGCAATAGTTTTACGTT  
TACCC TTACGCGTGCAGAATTTGTTTTTGTCTCTGACCACGAACAGGCAAAGAAAGTCTATGTCTTTG  
TCCACGATAAGCATGGATAGTAATCAGACGTTTGTATCAGATTGCACACGACGGCGCAAATCCCTTCA  
ACAACGTAATCCGACTGTAAGAGAGCGTTTAGTCGACCAACCTCTTCTCAGTCAACTCTGCAGCTCTAG  
CTTCGGGATTC AACTGCAATCTAGCAATAATCTCTTTAGAAAGAGCTGGCCCTATTCATAAAATATATGT  
AAGACTTATTTTTAATTTCTTTTTTCGCAGGAATATCTATTC CAATGATGCGCGGCATACGAAGGGCCTCC  
CTTAAAGTAGTATAAGCATCTTAGGTCAAAAATGTTATTTTTCAAGGTCTTCTTTGGGGCGGTCTTTC

TTTAAA**ACTC**CGTCATAACGCCGACTAAAAGGAAAGCATCAATTTGCTTCATCGTGTCCAAGATG**ACTC**  
CGACTACGATCAGCATGGCTGTTCC**ACCC**AAAAAGTAGCTAACGTTTCGCGTCA**ACTC**TCAAA**ATCC**TTCC  
CAAAACGGAAGGTAATATAGCTACAACAGCTAAAAATACAGCTCCTAGCAAAGTT**ACCC**T**ATTC**ATTGTG  
T**ATTC**AAGATAGGTCT**GGGT**TGGTTTCCCTTGCTAATGCCAG**GAAT**AAACGCTCCATTTTTCTTCATTT  
CAGAAGCTATTTGCTCTGGACGGAAC**TGCGTAGCTGTCCAAAAATAAGTGAAAAATATAATAAGCAACAC**  
ATAAAAAAT**GGAAT**ACGCCACACTACCTGGGGACAGCATAGTCGCAATGCGTTTCAACCAAGAAG**ATTC**  
GAGGAAAGAACTGCCAATCGTAGCTGGGAACAT**GAGT**AAAGAGGAAGCAAAAA**TAAACCGGGAT****ACTC**  
CAGCATA**ATTC**ACTTTCAAAGGAAGATAC**GATCC**CCCTCCTACAACCTCTCTCCTTCCAATA**ATTC**TACG  
TGCATGCTGAACAG**GAAT**CTTTCTTACACCTTCAATAATGAGCACAGTTGCTATAAGAACAAGACAAAA  
ACCGCGCAA**GAAT**TAAAAGCGAAAC**GATTC**CAA**ATTC**AGA**AGGATCC**TGAG**ATCC**CAAATTTAACTTGT  
TAAATATAG**ACCC**TAAAACGGAAGGAAAAGAGGCTAAT**ATCC**CGA**GAGT**AATGATCAA**ACTGATTC**CATT  
ACCA**ATCC**CTTTGTCAGATATTTGCTCTCCA**ACCC**ACATAAGTAAAA**GAGT**CCCTGTTGTCATAACCACA  
ACAGTTGTCAAATAAAAT**ACCC**AAAGC**ACCC**CAAACAGCTTTAAGGACAACATTGCTGGCAAAA**CAATCC**  
CTGGAACAACAAG**ATTCATTC**CGCAGAGCAAATTTTGCAAAAAGCAAAGACTGTACACAGGCTAGAACAAG  
**AGT**AAAAAGCCGTGTC**ATTC**GTCC**TAAATTTACGCTTCCCTTGATCC**GGCG**ACTC**TGCGATTTCTCTTTGC  
**AGAGT**CGGCATAAAAGACGACAAGAAGCTGTACAATGATTGAAGCCGAGATGTACGGAACA**ACTC**CAAGAG  
CTATTACCGTCATTTGAGCAAAAGCTCCCCAGAAAAATGT**CAGCTAACTGAAACA**AAATTTTGGCTAGA  
**CCC**CAGCAATTGGTTAAAGTAGGCTACGGCGGGTCTCCGTTA**ATTC**CAGGCACAG**GGAT**AAAC**ACCCCG**  
**ATTC**TACATAATGCAAGCAAGGAAAAATGTAAAAATATTTTTTGTGCGAGTT**CGGAAATCGAAAA**CACTT  
GTCGCAATGTAGCCATAAACTTTACCTAAAAGTTCTAGTTAAACAGCCTCGATAAGACTTTTT**ACTC**CCT  
CTGACAGCACTATTGCAGCATCTTTCCAGACTAATTTCTT**ATCC**AGAGCTCCTTTA**GGAT**TACTTTAAC  
ACGAGAAGTCTCTCTAT**GGAT**AACTTTTCTTTCTTTTAAAGCTTCCAAAGATACTTCTGCGCCATTGTCA  
AAAAATCT**ATTC**AAACGTTGTGTTGTGATTTCTTCAACACATTTATCAAAGCGTTTATGAGAAA**ATCC**TC  
GTGTAGGA**ACTC**TTCTGTATAAAGGTACGCCTCCCCCTT**CATATCC**GAAACGTCTCTTGT**ATCC**AGAACG  
GCTACCGTCCCCTTTGTGTCCTCGACCACTTGTTTTCCCGTGACCAGAAGAAGGTCCCTCGGCCAA**GAGT**  
TTCGTTCTTCGCTTACGAGGCGA**AGGAT**CTTGTAAC**ACTC**TAACTTAAATCATTGATAACGGCTCTCCTT  
TTCATAATATCATCTTTACAAG**GAGT**GT**CAGGAGAGCTTTAAAGCCGCTTTAACCTGATTC**ATAG**GGAT**  
TATT**GGATCC**TAA**ACTC**TTTGTACAATGTCTTT**ACCC**CGCCATCTCTAAAATCAAC**CGAAT**ACGAGA  
**TCC**TGCAAC**GATTC**CGGTTCTGGCTTAGCAGGTTTAAACAGAAGCTCTGCTCCATCATGATTGACAAGA  
ACCTCATGAGGAAT**AGATCC**TCCCTCAAGAGAAT**TGATAGAGACA**AGATTTTTT**CGAGCAGC****ATCC**CCAC  
CTTTAC**GGAT**GGCATCAGTTAGCTCGTTAGCTTT**CGCAA****ATCC**GAAGCCTAAACGCCCTTTTCTATCGCC  
AACTAAAATAAGCGCAGAAAACTAAACTTACGGCTCCTTTAAACAACCTTACAACAACGGTTGACGACG  
AGAACCTTCTCTCCAGCTGATCTTCCTTATGA**GAAT**TTCTTGATAGCGTCATTATCTAAACCTT**CATTA**  
AAACTGTA**ATCCACCC**TCTCTGGCTCCATCAGCAACCATAGCTACTACCATGATACTTATGAGCTCCT  
CGATCGAAAACA**ACTC**GATCTACTTGAAGGCCTTCCCTA**ATTC**AGCAATTTTT**ATTC**CCAAAGCTTTGG  
CATT**ATCC**TGATTTTTTCTAGTTA**ATCC**AGAAGTTTTT**GCAACCTTAGCC**AAAGTTGAAATAAAATGCTAA  
AGTTTTCCCTTCAACATCATCAATCAGCTGCACATAAACATGCTTATTTGTCTTACAAC**GGAT**AATCTG  
GGCTTAAAGAAC**ATCC**CTTTAAGGCTTCCGC**ACTC**TAAAGCTCTACGAGCTTCCCCGAAGTTTTCT  
TATATAAAGAGCTTCCATAGTT**CGACTC**TACTTT**ACCC**TCTATTTTTTACCAGTTTTCGCTGCTTTCC  
AGCCTTACGACGAACAT**ATTC**GTTTTCGTAAC**GAATTC**CTTTACCTTTGTATGGTTCTGGAGGGCGTTTT  
GCACGAACACAAGCCGCAA**ATTC**TCCA**ACTAACTGCTTATTGATA**CTTTAATGGAGATCAATGTGTTTT  
TCTCAACAGAGACTTCTA**ATCC**CGTAG**GAAT**AGGCATTTTTGTAG**GGT**GAGAA**ACCC**CTATTGACAGATC  
TAACAAGG**ACCC**TTGTACTGCAGCTCTGAAGCC**ACTC**CGATCATTTCTAAACGCTTCTCAA**ATCC**AGTA  
TGGACACCTTTGACCATATTTGCTATTAAGGCCAATAAAGCCCTTG**CATACGACCAGGTCTGTCTACAA**  
CGTGAGCCGCAGGAGCAACAACACCTCATTACCTTTA**ACGGCAATCTCAACTCTTTAGCCA**ATACCTG  
CGTCAAAG**ACCC**TTTAGGACCTTTACTGAGATTT**CATCATTTT****GAAT**AGAGACCTCTACGCCTGAGGA  
AGCACAATAG**GGT**CTCGAGCTTACGAGAC**ATTC**GTTACCGTCTAATCTTTTAAATTTGCTACCAAACCA  
AACAAAGCA**ATTC**CGCGCCAAC**ATTC**TTAGCCCTTGCTACAGAGCCTTCTAAA**ACCC**CTTGAG**GAGT**CGA  
AAGAACGGCAAT**ACCC**ATATTTCCAAATACATAAG**GAAT**TTTTGCTGCAGAAACATAA**ACCC**TTCTAGAA  
GGTTTAGACACACGCTTAAAGAGCAT**GAAT**CACAGGCTACGATCTTCCCCGTACCGCAAAAAG**ACTC**TCA  
TTAGTCTTTTGGGATTTTCTTCTTTTACTAAAAAGTGAGCAACGA**ACCC**GTGCTGCTT**GAGAATTC**TTAC  
TATTGCTTCAAGCATTTTACTATGCTCGATATCAATGTACAAATGCTCTGCCATCAAAGCATTTC**GAATC**  
**CGTGTC**ATAAAATTTGCGATT**GAATC****ACTC**GTC**ATTC**CCATA**CCGACCTACATCTCCCTTATTGAGCCTT**

CTTGAAACGCAAGCCATACACTCTAACAAAGGTAAGGCCTCGCATCGGTTTGTGCTGTAGTTACCCAA  
GTAATATTCATTCCTGAGATCGTTTAAACACGATCTAAATCAACTTCAGGAAAGATTTGCTGATCATCTA  
AACCAAGGGAATAACATCCCTCGTCCATCTCCTTTACAAGAGAATCCCTCTAAAGTCTCGAATTCCTGGGGA  
GACAATATTGCAAAAACGGTCCATAAAGTCATACATACGGATTCACAGTAGAGTGACTTTTGCTCCGATG  
CCCTGACCCCTCTCGTAACTTGAAGCCTGCGATAAGAGTTTTTAGTCTTGTACCAAAGGTTTTTGACCAG  
AGATAACCGCCAATTCCTCTAAATGAGCCTGGAAAAGGTTTTATCCCTTTGACGCTCTGCAAGCCCAT  
GCTTATTACGATCTTCTTAAGAACAGGGATTTGCATTACATTTTCATACTGAAACTTATCTTGAAAGAGTC  
TTTTCTTATCTCTTACGTATATAGTTTTTTTTAACCTGCTCATATTAACCCCTTCTCTCTTACCAATCGG  
TATAATGAAGAACTTCCATCGGAATGCTTATTCCAAAGCTCTCGTCTTTCTCTGTAACCTTTGACAAACA  
GTCTAGCAGGCTGATTATCGATACTTAAACGTACGTTAGAAATATGGAGAGGAGCCTCAATATTAATGCG  
CTTCCCTTTAGGATTCCTTTGAGAGCGTTAATATTTTTACTCGGACATTGATTCCTTCAACAACAACC  
TTATCCCTTCAACAACGTAACACTTTCCCTTGCTTACCTTTGTGCTTTCCAGCAAGCACATAAACAGTGT  
CACCGACACAAACACTACGTCTCTTACATACTATCTTACCTTTAAATCACCTCGGGAGCCAAAGAGCTAAT  
CTTAACAAAGCCTCTGTCTCGAATCTCCCTTGCTACAGGCCCAAAAATTCCTAGTTCCTTTAGGATGCGCT  
TTATCATCGATGATTACACAACATTCGTATCGAATCTTAGTGTAGAACCATCTTTACGATGGATATCGT  
TTCGAGTCCGTACGATTACAGCCTTAAACAACATCCCTTCTTTACGGAACATCAGGCTCAATATCTCT  
TACAGAGCATACAATCACATCACCGACCGTTGCATAACGTCGACGAGATCCGCCTAGAACCTTGAAACAC  
TTAACTTTCTTAGCCCTGTATTATCGGCAACTTTTAACTGACTTTCTTGCTGGATCATAATTGCTAAAC  
CACTACTAATTTACAGTCCGACAACCCGCCATCTCTTCGTTTTAGACAAAGGACGCGTCTCTTGGATTC  
GAACAGTATCACCTTCTTTCACATCCAATTCATTATGCGCATAAATCTTGCTAGAATCCCTAACACCTT  
AGCATATTGAGGGTGCAGGTATACCCCTTCGACTCGAACAAACAGTTTTTTCCATTTTTGATGAGACT  
ACTACACCAATTTTTGGTCTTTCTACGGCTCTCACATCACTAGCCATGGACTCTATCCCTTTTTTTCTTGT  
TTTTATTATTAGAGCAGGCAATGCTTTTTCTTATACAGAGAAAATGATGAGTTTTTACAACCTTTATCTT  
GTAAAGCAGCTTCCGCACGCAAAGCGAAGAGAGCTTTTTTATTATCACGAATAAACTCATCCAATCTTTC  
AGAACTCTTCTCTTAAGCTCCGCTAATAAATTCCTTTTTTGCTCCATACTATAACCCCTTCCACACGCTT  
AACAAATCGTGTCTTAATTCCTAACTTTGAGCAGCTCTTCTCAAAGCATCCCTGAGCATCTTCTTTTCGAA  
ACGTTTGCCACTTCGAATAAATACGTCGGGACGACAACAGCTACCCAGTGATCAGGAGCTCCCTTAC  
CTTTACCCATTCGAGTTTCAGCAGTTTTTTTTCGTTACACTCTTATCTGGGAAAACCTCGAATCCAACTTT  
CCCTTTACGTTTTTAAATATCTGTTGATAGCAACCCGTCATGCCTCAATTTGGCGGCTGGTAATCCATCCCT  
CTTTCCAGAGTCTGCATTCCAAATTCGCCGAAGTCAACAACGTTGCTCCCTTACTCAATCCAGCAAAC  
GACCTTTCTGCTGCTGCGAAATTTGTTCTGTTTAGGCATTAACATAATAATTCACACACCCCTTATAACC  
TGCTGCACTACGACGAGCTGTTGAAGCAGCACCTGCATGATTAGCCGAGGAACGGCCTTCTTTTCAC  
CAAGATTAATCCAACTTTTTATGCCGATAATTCATAAGTAGTCTCTGCAGACGCTGTAGCATAATCAAT  
ATCTGCTCTGAGCGTATGAAGAGGCACACGACCGTTCTTATAACATTCGACCGAGCAATCTCAGCTCCA  
GCTAAACGACCAGAAACCTGAACTTTACTCCAAAGCACCTGCATCCATTACAGATTGCAAAGCCTTTT  
TCATTGCTCTTCTGAAAGAAACCCGTCTTTCTATCTGTTTGGCAATACCGTCTGCGACGAGCTGAGCGTT  
AAGCTCTGGGCGTTTAACTTCTGCAATCTCAACCCAAACATCTTTGCCTGTTAGCTTTTTTCAGCTCGGCT  
TTCAGAGACTCTACTTCAGCCCTTTCTTCCGATTACTAATCCAGGTCTAGCAGTATGGATAGTAACTT  
CAATTTTACCGCTCATACGTTTAAACAACGAATCCCGCAGCACCTTGACAAGAAGGTTTCTTCTCAAAA  
TTCCTCTAATTTTACATCTTCAATGAGAAATTTTCCGAATTCCTTGATTATCCCATACCACAAAGATCGC  
CATTTCTTAGTAACCGCTGTGCGGAACCCCTACTGGACATCCCTTTTTGACCCATACTTACTCTACTGCC  
CTCTCTCGCCAACAATCACAGTTAGATGACTCGTGCGCTTCAAAAATGGGGCTCTTCCCCACGACTCTT  
AGACTTCATTCCTTTGAACATTGGGCCGGCATCAACCCGAACTTCTAGAACACAAAGATTTTACGTTTT  
ATATTTTCATTGGACTCTGCATTTGCAATAGCGCTATCCAAACACTTTTTTAAAGGCATCTTCCAGCCTTCA  
TCTGAGAAAAGCTGAGTTGCTGTTGAGCTTCAACAACACTACGGTTTCTCATCAATCCCTGCAGCTAAACG  
AGCCTTTCTTGGCTGAACCCGTATGTATCGGGCTGTCGTTTTAAACATAACCTGTCTCCTTATGACTTAC  
CCCTTTTTTAAACGGATGGCTCTTAAACATTCCTTGTGGAGAGAACTCTCCCAACTTGTGTCCAACCATAG  
TTTCTGACACAAAGACCGTCAAAAATTTACGGCCATTATGAACCTCAAAGTGTGCCAATCATTTTCAGG  
GGTAATCATAGAACGACGAGACCAGTTTTGATTGGAGTTTTCTTCTCAAAGCGTTCATATCTCGGACC  
TTTTTGAGAAGGTGATGATCAACAAAAGGACCTTTTCTTAGCGATCTACTCATAATCCCTATTTCTTCT  
ATCCCTTAACTATCCACTTATTACTCTTACGCTTATCACGAGTTTTCAATCCCTTTCGTGACTTTACCCCAA  
GGGGTCTGGGAAATGTATCCGTTATGACGCCCTTACCACCTCCGTGTGGGTGATCAACAGGGTTCATAG  
CTGTTCTCGAACTGTTGGCCGAATTCCTTTCCATCGACGACGCCAGCTTTACCGTCTACACACAGATT



GTGATCTGCATTGGAGACCTCTCCGACAGTAGCTCGGCACATTTCAATCAACATACGAAATTCGCCAGAA  
GGCATCTTCAAAGTGACGTATCCAGCTGTTTTAGCGATGATCTGGGCTGAAAGTCCTGCAGAACGGACTA  
ATTTACCCCCGGAGCCAGGTCTCATCTCCACGTTATGAACAGAAAGTCCCAGAGGGATGCTCTTAAAGAGT  
CATGCAGCATCCAGTTTTGAAAGGACTTCCTTCTCCAGAAATCACACGATCGCCTCGCTTAAATTCCTTTA  
GGAGCTAGAATAACGCTTTTTCTCCATCTACATAATCAATAGAGCAATATAAGCAGAACGGTTGGAT  
CATACTCCACAGAAGCAACCTTCGCTTCAATACCGTCTTTATTACGTTTGAAGTCGATCACTCTATAATG  
ACGCTTACTCCTCCTCCACGATGGCGGCAGGAAATATGTCTAAATTATCTCGCCCTCCAGAGCTCTTT  
TTGAAAAAGAAAGCTTTTTATTTGGACGAACACTTCTTCTAGAACTAGATCCCTTTAACTCTCCTTGAG  
TAGTAAGCTCATCAAAGAAGGCAGAATTAAGTGTCTCGTCCCGGGAGTTACTGGCTTAAACTTTTTTAA  
CATGTTATTCCTTCTCCTTCTTTACTAACCAATAAGAGTACCATCAACAAAAGTCACAATAGCCTTCT  
TAAACCCGCGGTTCTCCTTTTCTCGGCCTCGGAATATTCCTGTAGGTTGAGGTTTAAACACACATGGT  
GTTTACTTTTTTAAACCTTACACCTTTAGCAGAATAAATTGCTTCTATGGCTTACAGCAATCATAGGCTTC  
GTGGCGTCCCAGCAACAATAAATGTGTACTTGGATCTTTGCAGAAACTGCCTTTCTTTTTTACCTTCTC  
CGTCCCGGAGACTCAAGCCTTCCAACATCTTTGCCCTTCTCGGTACATAATGTCTTTTGACAACATCATA  
AGGATCTTTTCATATCCCTCGCTTCCCCTTTAATCTTTTGTGTAGAGACAAGACTCTCGACAAGCAATTC  
AAAGCCTTTTCTGAAACCACAATATTTCTAGCAGCGGCAATATCGTATCCGCTGATATTCCTCCTGTAAG  
TAAATCCCTTACAGCAGACAAATTACGCACACTCAGTCTCAAATTCCTATTGCTTCCAACATGAGCTAA  
GCTGTCAACGAACAATACCCACGGCATTCACGTTGCATTCCTTTAAGAATCTTAAAGCTTCTTTTGTCT  
TTAGGAGCATCCAAAGCTGCTAACAACACAGAGTCTCTGCAACAATCAGCTTGCCTGTTTTGAATTTTTT  
GAGCCAAAAGCAACCAGATAGCCGCTTCTCTCTTTTTTGTGATACGAATATGCTGATCAAATTTTGG  
CTTAGGACCGAAAACAATCCCTCCTCCTCGGAATGAGGAGCTGCCAAGCAACCCGACGGGCATTCCTCC  
GTCCCTTTTTTGTCTAAAAGGCTTTTTAGTGAATGGCTAACTCCGATCGTCTCTTGTGCAAGCGCTCC  
ACTGACGTTTGTGGCCTGAATGGCCACTAGATAAATCTTTACTGACTGCTCTCTCCCTTCAGTAAAGAA  
GGCATCAGGCAATCAAACTTCCCAACTCTTTCCAGAAAATCAAATTTTGATAATAGAACCATTAGG  
ACCTCTACCCCTCTACTCCGCAAGAAGCTTCAACAACAACGGATCCTTTAAAACCAGGAATGCTCC  
CTTAACGAGCATTACCTTTCTATCCAAGTCAACTTTTACGACTTCTAAATTCCTTGACCGTAACCCGATCA  
CATCCCATGTGACTTGGACGTTTACTTCCGGGAAACATCGGCCAGGAGTAGATCGCATCCCAATAGATC  
CTGCATGACGATGAAATCCAGAACCGTGGCTTTTTTGGTCTCCTCGGAAACCAAATTTTTTTCATCACCC  
TTGGAAGCCTTTACCTTAGAAATCCACAGATGTCAACGTTAGATACTCCGTCGAAAATTTCTAACCCA  
AATTCATCGCCTAAAGAAACAGACTGAACAGCCTTCTTGAACGACAACCTTCTTTAAAACACGACAAG  
CACGTCCTCCGGACTTCTTAAAATGTCCGAGTAGTCTTTGGAGAAACGCTTTTCAATGGTTTTTCTGG  
AGCTGGACTACATCAGCTCCTATTTGAACAGCATTATAACCATCTGAAGATGCGTTTTTCAGCTGGGCA  
ACAACGTTTGCATCTACGCTAATTACTGAACACGCAACAAGATTTCATTCATCGAAGACATGCATCA  
TGCTTCTTTTTTCCCTATTAGGCTAAGCTGAGACCGCATATTTAATTACCTTATCACACAACCTGACAA  
CGCTCACAGACCGCCCCGGTGCCTAATTACACTTTTAGCAAACGGCCATGCCCTCCACCTGCAAGAG  
CGATTTCCACGATAAAGAAAACGCGGCTCCTTAAAGCAAACAAAGGCGGCGAATGGCAATGGTATATGA  
CCTGCGACATCCACACAAGAGATTTTTCTTGACGCTAAGAAATCCCACACCAAAAATCGCAAAAACAAAG  
CCTGAAAATCGTCTAGTTTTACTAGTGGAGCTTCTTGGAAAGAAAACCTTATAACGCTTATCCAAAGAA  
AATTAAGGGACAGATTATCAAAGGAAGACGATTTTACAATAAGAAAAGCTAAGCACTTTGTAGATAAA  
AAAGCTGTTTTCTTTTAGAAACAGCCTTTTTCTTAAGAAATTTAAAAATCCCTTATACTCTGTTGCAG  
AAAGTCCACAATCAATAACTGCAGAAGTGAACGTACATCCCGCAGCCACAATGCACGAATACCCATTG  
TAATAGGCAACGGCACCAATTTGAAAACGTGGCAACGCATTCAAAACCTTCTCGAGCATAGTGAGGAG  
TGCACTTGTATGCGCGTGAACGTCTTGGCTTTCTCTCCAGCGACTCTCCTCTCGCAAGCATTTCCTCT  
CCCGACAATTCGAGTGACGACTCTTCTCTCGCAATACGAGCGCAGCGGGCTTCGCAATCTGCTCTTTCCG  
CACTGATAGCGAGTCCAGAACCCACCACAAACGCTGCATGGTTAGCCGCCATAATATAGCTAACAGAAGA  
TCCCATATTTGCTTTAGTTTTGGGAAGAAAGAAACGGTTGCGCCAGCATTTTGTTGACAAACAGAATCGGA  
CGGATAGCTCCGAATGTGCGGAGGTAGGTAATTCCTCCGATGAAGCTACAGACAGCCGAGCCGCTCTGC  
GCTTATGAGACACACAAAGATCTGCTACGAGCCCCATCCCTTCTTGGCGTTTCTGACTAGCAGCTTT  
CATGTAAGAGAAGAAGCTTTGCGCACTTTGAAGTTCCTGGCAACGCTCCGTTAAAGGCATTCCTTAA  
GCGAGAACAGTTCTCGCATCCCTAATCCCTTTGGACACTTGGGAAGCTGTAATGTGTGCGGAAGAGCCCG  
CGCTCCAGCTTGTTCAAAATATTTGCGGTCAATTCGGCAGCAGACTTGGCGACCTTAAACAGCTTATC  
CATTCCTTCGCTTATTTACTACCTTGCCATTTTATTGCTGGGCTGTGTAAGAAAAGCTTTTTAGAGCA  
TTCCTGTACCAGACCTAAACGTCCACATATAGCAGCCATATTCACCTACCTGCTTCAAATTTATGTAC

ATACAAAATTTAGAGAGACATTATACCACTTCTATTACTTAAATCGAAAAAGGAAAACGCAGCAAACCCCT  
TCTAGAAAGGCCTCTCAGACCTAGAATAAAAAATATTTTGGACTATCTAGAGGCATCAAATCTTTTTTAG  
AAAAGCTTTGAAACCAACCTTGATTGGCCGTTAAAAAATCTTTTGGCTTTCATCGAAGCTTTTCTTCTG  
GCTGAACCATACGCAATCGCAAAGCTCCTTGACGGCAAGCGATCAGCAAATCCCTCCAGAACTCCAAG  
GACTTCACCTGGATCTCCATAATTGCCAGAGAAAAGATTCATTCTAGCAGAGAGCACGCCGAGACGGCGA  
GCCTCTTCCCTTGAGATAGCAGTCCAAGCGCCCGGAGCAGGCGAGACTCCCGGATATGCGCGT  
ATACTTGAGAAGCTGGAGCATCAATGAATCCCTCCCTCTTCTTAGTTAATTTAGGAGCCAGCGTAGC  
CATCGCTTCAATTTGAGGAACATGGCGCACTGTTCCGGCCTCAATCTCTTGTAAGTCTTTAACAAAAGC  
TCTCCACCAGAGGGCGCTAAAGCTTCCGCTAACCCCTGCAGTCATATCTTCGCCAATGGCTACATAAT  
TCACATTAGCTATATCCCCAGTATCCATCCAGCGTCCATACGGATCACCGTGTTCAGACAGAACTCC  
GCCATCCATAATAACAACGCTGAATAGGAGCTGCTCCGCGATATGCGGGTAGTAACCCAGCATGAAGATTA  
TAAACAACCGTATGTAGGGATATCTAAAAGCTCCTGCTTTAAAATCACCCCGTATGCGACGACAATAAAA  
CATCAGCCTGCCATTCGTAATTGAGCAAGAAAAGCGGGATCCGTAGTCTTAATGGGTGAAGTAAAGG  
AATATTTTTAGACAAGGCTAACTGTTTTACTGGAGAACTAATCAGCTTAGACGAGCGTTTTTGGGTTTTA  
TCAGCTCGCGTAAACAACCCGACAATATGAGTATGTGCATCCAAAAGTGTTTTTTAAAACAGTAGCCGCAA  
ATTGGGGAGTCCCCAGATAAACGACTCTAAGACTCAACGAAAGCTCCTTCTTTTTTATCTATCGGCTCTT  
CTAAAGATGCTTCGCAATCCACGCCTCTCTCTATACCTCGTTTGGCTGGCGACAAAATTCACGAA  
ATGGCGCACTTCAGGGACTTCTCCAAAATCTTCTAATACGCTCTCCAAAGAGGCTTGGAAAGACTCGTCC  
GAGCGGAAAACCCGTTTTAAAAGTCTTAATCAATGCCAGACGGGTTCAAAAGATACCTGCCGCGTTCGA  
ATCCAACCTTGTTAATTCCTTCTAGAGCATAGGGATGCGCTGTCCCTATAGTGAAAGGCGGGATATCAG  
ACGAATACCGCTCATAGCTCCGACCATTGAGTAAGAGCCTATACGAACAACTGGTGCACACCCACCATG  
CTACCTATAGTTACGCAATCTCCTACTTGCACATGCCGGCAAGCTGTACATGCGTACTAAATACAACAT  
TATTCCTACAGAGCAGTTGTGTGCGATATGCGCCCAAGGCATAATTAACAATTTATTCCTATAGAAAC  
TGTAGTCCCCTCAAATGTAGAGGAGTAATCATAGCAAATCCGCAATTTCCGAATTTCCGAATGCTCACC  
ACAAAAGTCTTCTCGCCCTTAAATTTAGATCTTGGCGTTATTTCCGATCATTGCAGAAGGCCAACTG  
TTGTTCCTCGGCCAATGGTTGTGAACCCGTCGATATATGCGTAAGATTTGACCACTACATCATCGAAAG  
CGTTACACTCTTTTTTACAATAGCATAGGGCTCTATCGTACATTTTCCAATCCGCGCTCCATCTTCC  
ACAATCGCTGTAGGATGAATGTTGGTCATACGCTTCTCTTTATATGGACTCTTTTTTAAACAAGACAAA  
GCTGAGCTCTCCTTCAGCGACTACCTGAGAACCTACAAAGGCTTGTGCAAAAAGCCTTCCACCTTTAGCC  
GAGATTAAGAGAACTCGGCTTCAAGGTTAATACGTCTCCAGGTTTAAACAGGCTGACGGAATTTTGCTT  
TCTGGATACCTAAGAACAAGCGATCTTTTTATCTCGATCGTTTTTCCAATATAATCCCTAACAACACTCC  
AGCAGCTTGAGCCAAAGCTTCCAGTATTAATACTCCGGGCATGATAGGAGCTCCAGGAAAATGTCCCGCA  
AAAAAAGTTTCGTTAATTGTTACATTTTTCTGAGCCACTACCGAACGAGTGTAAATCGTAAGAAA  
TTTTATCCACCAATAAAAAGGGATACCGATGGGGAAGTAAATTTGTATGTCTGTATACCTAACACGGG  
CTTTTCATTCATTTGACTAACTCTGTTTATGCTGCAACGCCTCTAAAATTCGTTCCTCCCAATGCAAT  
TGAAAGAATGCCCCGATCCACGGCAATAACATGTGCTAAAAAAGGCGTTCCAACATAAGACAAATCTCC  
TATTAATCTAGTATTTTATGGCGAACAGGCTCATCAGGAAACGCAGCTTACCCAGCTAATCAGGCCA  
TCGTCTTTAATAATACGGCATTACCTACACAGCCCCCTCCTATCAACCCCTTTTCCATGAGGAAGCAGA  
GTTTCGCTGTACAAAGCAAACGTCTGCAAGGAGCGATTTCTTACGAAAAGATTCCTCCGAAATAACCAA  
GGAACGATATTGCGTGCCTATCGTAGAGTTATGCGAATAGTGCAAGGTATACGAAATTTTAACTCATCC  
GAGGGAAATGCTGCTAAAATCGTATCCCTGATACTGATAATAGACAGGATGAGCAAGCCTTGCATCTGGA  
CCGTCTGCTCCTGCTCTTGAATCCCTGCCTGGTCTATCAGGTCCATAAACACCTGAGCACTACCATCACC  
TATGGGATTTTCATCTTCCGTGCAATAGATACGCACATTATCCACTCCGAAGGAGTAGAGCGATGCCAAC  
AAGTGTCTACCGTAGATATAACACTACCATCTAAAGACAATGTGGTGCTACGTCCCCTTCCACAAACAT  
TCGCCAATCGAGCGGGAATATACTGTTTCAAGCTGCATGACGAGAGAAAACCTACGCCTGTATTTCTCT  
TGCGGGCTCTAGAGTAAGCATCGCAGCTTTTCCAAAATGCCTCCACCCCGGAATAGCATACTTACGC  
TTTAAAGTCTCTGAGCTCGACCTAACATGCAAAAACCCCTGACAAAAGAGACCCGTATATTATCCCTTTT  
TTTTTAGCAAGCAAGCGATATCAAAAAATTACTACCTAGTTCTAAAACACTTGCTATCTCAAAAAATGT  
TTGTGGTGGGTCTCTTCTTTTCTTATAAAAAATAGGCAATCGCTCCGATAACCCGAACAACTGCAATC  
AGTAACAGAGGAGCATCACCCAGCCTTGCATATACAGTATGATAACTGTAAGAGGGACGGAAACTTGG  
GTACTCTGTAGAACTGGGCAAGTCTCGATTCCAGGGAAGTATGCCGACAATTCATCCCAAAGATC  
CACTGCAGCAGAAACTCTGTGTGACAGGCGGAATACAAGGTATACCCAACTCTTGATTACGTAACATG  
CCATGATAAAAAATGTACTAGAGGCAGCCTTGAACCGGATACCAACCGTCATTAGTAAGATTTACTAAA

TATCGGCTTGTTGCCTTTTGTAAAGGGC**GAAT**TGCAT**ACCC**AAATGTCTCCTCATAACAAATAGAGAT**CC**  
AGCTTTT**ATT**C**GCT**CTGTTAT**ATT**CACA**ACT**CAGAAA**ACT**CTCCTGGCAAACGTTGAAAGGGAAAGAGCA  
A**ATT**C**TGG**GAAAAAGGTTT**GAC**ACAAGGAAAAACCTATTTTCCCTCCAG**GGAT**GT**ACT**CACCTCCAGGAA  
CA**GAAT****CC**GCTTATCATAGCTAGTTATTTCCCTTCTCGGATACGC**ATT**CAGCAGCATTATACAAATG  
CAGT**ATT**C**CCC**CTTTATTTTCCATCGTTCC**ATT**C**CC**ATGATAACGGTGCATTGATAACGTT**CAG**CTATC  
GCTT**GGAT****CC****AA**T**CC**AAATTTGTGAAAA**ACT**C**G**CCCCAAGATTTGTTAGGAAGCAA**ACT**TTCTAATACAG  
GCTGATTTT**CAT**GAA**GAGT**TATAGGCTTGTCTATGTAAGCCAAAAGGAACACTTACTTCTGGGAAAACGAT  
CACATCTACAG**GAGT**TT**GAAT**AGTCTGGCACAAAAGAAACCAAACCTCTCCAAATAGCACTAGCC**AT****CC**TC  
CCTGCATGCATATGAGGACTAT**AT****CC**AGGCTGCACGATGGCA**ACT**C**G**AAGCACTTCA**GAGT**CGGAAAAAT  
GCTTCTTTAGGT**ATT**C**G**TAATGCGCTCCGCCTAACAGATAAGGGAACGCGCACAAACGTCAACCATAAACC  
TTTGGAAAA**GAGT**GTTTTAATAAACATGCTGCAAAACAGCATATATTGGCAGCAATAACTAGAAA**GCT**C  
TGTCAGCC**AT****CC**AAAAAGCTGCC**GAAT**TGCCGGCCATAGGCTGTCGCTGTAAGAGGCCAGCCAATAA  
AATCAAAAGAA**ACT**C**CT**GAAAGCA**ACCC**ATAATAGCGTATTGCTTCTATCGCC**ACCC**AA**ACCC**CTGGAAG  
CCAAACAAGAGCTCCCTATATTGCTTGCACAAACACCACACAACCAAACAAGAAAA**ACT**AGCAAAT**AGG**  
**GT**GGCGAGATAAGAAAGCAGTAT**ACCC**CAAACAAAATAGATGCTTGTCCCTACATAAAGATCTTCAAGCA  
**TCC**AAGAGAAATGAGCGCCTTGCACAGTCCAAGTCCAATAAAAAGCGATGCACCAA**ACT**TTCTTCCAAGA  
TAATTGCTCTACTAAAGCAAAAAGCCAGCCCAAAGTAAGCTGTAACCGCAAATACA**ACT**AACAACAGAA  
GCTACAACACTTAC**AT****CC**GGCTGAGCCAAACAGACCAGC**ACCC**AAGAA**GGAT**GATGTATGACACAGGTT  
TAAACACTAAAGGG**ACT**C**CC**TTACTAGCTTAC**ATT**C**A**AGATGAGAGAAAA**GAAT****CC**CTTAGAAGTTAC  
TTAAAGTTTTAAGCGCAAAGCTCTTCTCTGGTCTGCTTCCCTAAACCGGCGTATTTCTTCTGACTTTCA  
**GGGAT****TA****ACT**C**T**GGAAC**TT**CCACAGGG**GAAT**TGTTTTTGTCTACCGCAACGAAAGTAAAGTATGCTGAGG  
TGATATGGCGATGTTCCCTGCTTATAAATATTTTCTGCCAGACTTTTACGCC**ACT**TTCTAAAGAGGTTCT  
CCAAGACCG**ATT**C**AC**GGAAGCGCAGCAAATCAAATTTTCGCCATATAAGCAGGAGCATAAAAAACGCATA  
GCATCTACAAAAGCAGTTACACAAATAC**TT**TCGCAATGCCGTTCCGGCAACCACTAATGCCAATCG**AT****CCA**  
ACAGGCTCATCAATAGCCACCAAAGATCGTGT**ATT**C**G**TATTTAAGTCGTTAG**GAAT**ATTTTATAGAT  
GTGATCGGTTATACAGCTGGCAGAA**ACT**TTTTTCCCTTTTATCTTCTTTATT**AT****CC**TTCCCTCACATC**ACCC**  
TTCTATAT**GAGT**CTAATAGCCTCTATCTTGACTAGTCTCAGAGT**TAA**AGGCCCACCTCT**ACT**C**CC**AGTC  
ATCTCTGTAAT**GGAT**AGTAGTCTCGGTATAGAAGAAAATCAAGAA**ATT**C**CT**TGG**AGG**ATTACA**AT****CC**TAA  
AAAT**GGG**TGTTTTGCCTGAGCAA**AT****CC**GGT**ACCC**TTTTTCCGTGATTTGATCTCACTAC**GGAT**AGAAAA  
AGTAGATCTTGGTCAA**AT****CC**ATTTTTGAAGCCACAGTAGAT**ATT**C**TA**AT**GAAT**ATCTGTAAACAACC  
**ACCC**TTTATACTTCCCTAACGGCATGTATTTCA**TT**TAAATAGGCTTAGACAAAATGTGTGT**CAC**CTGCGA  
CAGCGTACGGAACCGCTTAGTTAAGTGT**TT****GAAT**ACCTTAAC**ATT**C**AT**TTCCACATCTTTCATAGCTCGA  
TGATTTCCCTTGATGAGGAACATTGAAATGCCTTGCTAAAGCTTCTAA**GAAT****TAT****CC**GGACTATCTCCAT  
**ACT**C**TT**TAGCTAGACGCAAAGTATCTATCACATAATGATGCTTAGGAAGCAGAGT**TT**CCCC**TAA**ACGTT**C**  
GCTTCCCTGGGAAAGAACTTGTAGATCAA**AT****CC**TACATGGTGC**CC**GACGATATGATCTCTTCCCTAAAG  
AA**ACCC**TTA**ATT**C**T**AGAGAACACCTCACCAA**ACT**TTGGCTT**AT****CC**CTTAACATGGCATCAGAAATCTTAT  
**GAAT**CTTTTGAG**ATT**C**T**GCTGAAACAGCTCGCTCC**GGAT****GAAT**AAGAA**ACT**C**TACT****GAAT**CAATAATTT**C**  
ATCAAATGTAAACC**GGAT**TGCAGCAA**ATT**C**AA**T**CAC**GGAT**CC**TTTTTTAC**AT****CC****AA**T**CC**CGTTGTTTCA  
CAATCTAAACAACGA**ACT**C**AA**C**AT****CC**TTCAATAGTACCACGCGCTAATCGTTCTCCATAAAAAAGCTCA  
AATCACAAACCGTCTGT**ACT**C**CT**ATACTTACTTCTCTTGTGC**AT****CC**GTAAGCGAGCGCATCTGCACACA  
AACACTTTTGC**GAAT**TGTGGAAGCAA**ATT**C**AC**GGCTTCTGGCC**ATT**C**GAC**ACAAATAAGATCTTCTTCC  
TCTGCGTCTTGGAAAAGATCTGCTCCGTTCC**TAAT****AT****CC**ATCGTCTCAAGACGATACAAATCATAATGGC  
AA**ACT**C**TG**CGCCACCTGCTT**CATA**AAACATGAAGCAAAGCGAAAGAGGGGCTAGCCACCTGATCGACAGC  
TGCTCCCCTAAAA**ACCC**TTGAAC**AT****CC**CTCTAA**CAA****ACT**C**TG**TCTTCCCTGAGCCGTAGTCCCCTGAT  
AATAAAACAACCATAACCAG**GAGT**TAGGTCCC**GACCA****ACCC**TAGTAGCTAGGTCTATAGTCTCTT**CAC**AG  
**AGT****GAGT****TACT**C**TT**CTGTATCT**ACCC**ATTGGCTAATGACTTATGAAACGCTGTGTC**AT****CC**GCAAGGCTT  
TCGACAA**ACT**C**AG**CGATCTTTTCCCTCTAAAGCATT**TT**TGTAATA**GAGT**CAAAAATGAGCTTCTAAT**T**  
GGA**ACT**TT**ATT**C**TG**ATTTTGTACTTCTTC**GAGAGT**CATAGGACGTAAGTAAGAAGTTTTAA**AT****CC**TCCAA  
GAGAGT**TGG**TAAACTGTGGAACA**ACT**TTCCCTGTTACTGCAGAAGCATAGACAGTCTAATGAT**TGG**TTCC  
TTTGGCGGAACAATATAGGCTCTGATCACTTCA**GGAT**CATC**GGAT**ACTAAAAACGTTT**GAC**AGCTACAC  
**ACT**C**TG**ACGCTCTCT**ATT**C**TG**AGGGCAAGAAGAAAGCCAGTCATAAATAGC**AT****CC**TGAGGGT**TT**GCGTA  
GACGTTATCAGCAAAAACCTTCCCAGTAAACGGACAAATGAAAATACGCTTTGCTGCTC**ATT**C**AC**CTCT  
GGCTTACCAGAAGAAATTT**GAAT**CTCTGTTTTCTCTCCAGATCTTCTTGTCCGCCTCTAA**CA**ACT**GAAT**CG

CATCTTCTGTGCTTTTAAAAATGATTTTATCCCGAACAAAAACAACCGGACTCAAGCGCAAAGACTGCTC  
TAAATAAAACAAGTACGTTGCTAACAAATTCCTGGGGATTTTTGCTTTTTCAAAAACGGAGAAGTTTTTGT  
TTGATACTTCCAGAAATATTCATACTTATCCCTTACTTTTTTTCAGTTGCTTAATGGCAAACGGATTCCTCT  
TTTAATCACCAGCCTCCTTCTAAAGGGAAGCCTTCCGCCCATATCCCTGTTCTCTACCTACTCTCACTT  
CCTTGCAAAAGTATTTTTACAAAAAGCAAAACAGGCCTAACCTCCCATGCTCTAGGGGTAGGGGCATCC  
TGAATCGACTACATGCTATCATGATTTTCCGTTAGGCACAAGCTCATTACGTTTTTCAATAAGACTTTGA  
ATTCAAATGAAAAACTTCTATGTCGAGCAAGAAAAATCATTCTCTAAAGCCCTTCGTACTAAGGGCTCAA  
AAATTTTTGTTTCTATATAGCCTTGTCTTTAGGTTTGTAAAGAGAACCTTAGGAGATGTTTTTATAGCCA  
CCAAAAGAACATTCGTGTGAGCTTAACCTTTTATTAACAGCTTCTCTCTATACTGGCCTCTCATGCA  
GCTATGGCGGAACCGGTAGACGCGCTAGATTCAGGTTCTAGTGAGCTTTTGCTCATGGAAGTTCAAGTCT  
TCTTAGCTGCAAACCTCTTTTCAACAAACGCCCGGACAAGGGCATCTGTCTTGACTTTTTCGTAGAGGT  
TATGGCTAACTGGCCTTTCAGAAATACGGCTAGCCCCGTTTGCTTGCAGTTCTTAGGGAAGCCCTGAAACC  
TCCTAGCAAAGGTTTACATAGATTTTAAATTAGGAACAAGTTTTATGGTCCAAGTTGTATCTCAAGAAAA  
CTTCGCTGATAGCATTGCTTCAGGACTAGTCTTATCGATTTTTTTGCTGAATGGTGTGGCCCTTGTA  
ATGCTGACCCAGTACTCGAAGCTTTGGCAGCAGAACCTCCTCACGTCACTATCCATAAAGTGGATATTG  
ATTCCTCCCCTAGACCTGCAGAGCAATACAGTGTTCCTCTATCCCAACGCTGATCCCTTTTAAAGATGG  
AAAAGAAGTGGAGCGCAGCGTTGGACTCAAAGACAAAGATTCCTTGATCAAGCTCATTTCCAAGCATCAG  
TAGATGCTCTCTTCTCTAGAAAAGGCCGAGAAATTCCTGGCCTTAACATGATTCAAAATAATGTTTTGTA  
GTTTTGCCGAGCGACTTACATACATAACTATCCCTACTGAAGTAGCTAAATTCAGGGATCGAGTCCCTTCA  
ATCATAGGAATGTATAAACACTGAGACGAATAAGCATCCAAGACGGTCTGCGACAATCCTTTTGATTCG  
CGCCAAAGATATAGGTCCCATCTAAAGGCAACTCTCTCCCCATAATAGGAGGAACCTTTTGTAGTTAG  
ACAAAAAATGCGCTCTTTAGGCACCCCTAAAAGAGCTTCTTCTAAAAGAACTACCACGGATAAAGAAAGC  
CGTTCCCAATAATCCATTCGGCTCTCTTCAAAAATTTATCTGCTAAAGAAAAACCTAAGGGCCGAACCTA  
ATATAAGTTCAGCCCTAAAGCCACACATGTCTACCAATATTCCTGTATTCGAGGGATATCTGGATT  
GTGAAGAACGATGCGCATAAAAAATCCTAACGACTATTCGTGAACAGATACATTATCGTCGTTTGCTTCA  
ATTAACCTCACTTCAAAAATGAGTAGAGAGTTTGGAGGTAATTGTCCAGCTGTTCCGTAAGCTAAATCTG  
GATGTATGTAAAGAATCTGAACCTCTCCTTCTTTCATCCCTTGCCATACCTTGGGAAAATCCAGGAATAC  
TTTTGGTCAAAGGCAGTAAAATGGGCTCTTTATTCCTCTCTGAAGAAATCAAAAACCTTCCCATCGATGAAG  
CTCCCTGTATAGTGAAGCAAAGCTGTAGGCTTCCAGAAAGAACCCTGTCCTGTACCTCTTTTACAACAC  
GGTACTGTAACCTATTAGGCTCTAATCAATAACCAGCCTTCTTTATTTTCTTTTAAAGAAATTCCTC  
TGCAGAAGCTAAATTTTCCGAGCATTTTGGCTTCCGAAACTAGCTTTTGTACTTCTGCCATTTGTTTTTCA  
TATTCGTATCTGTAAAGGAGACTCTGTCCATCTATTTTCAGATTGCATCCCTTTAATCACTTCAACAA  
GATCTAACGAAAAATCTTCCGTTCCGCTCAACTGACGAGCCAATAAATGCCAAAAGTTCTTGATAACTT  
TTGATTGTCTGTCAATGCAAGTCTTCTACCATGCTTTTCTCCGTAGCCGATGTTTGGCAACCGCCTCCG  
TTATCACATCCCTACGATAGGCAGAGCGACTGCAACATAAGCATCCAACTTAATATATTCCTTCAATTCGTT  
TCTTCTCAGTTGCACCTGATTTTCTCAGATGTGCTTTTTTGAACCCTTCTTAGGTGAAAGACATCC  
ACCCCTATCACATGCTGTAAAAAAGCCCGTTTCCCGACCTCTAGAGCAAAAACGATATTATAGTT  
TCAACCCAGTTCTTTAATTGAATCGGCAAAATTTCTGAAGGTGCCGACATCATCAATCTCCTGCTTT  
CTGTGTTTTAGGGAACGCAATCACTTCTCGAATAGTTTCCGCTCCTGTTAGAACCATCATAATACGATCT  
AATCCAGAGCAATCCCTAAATGTGGAGGAGTCCAAAATCAACGCATCAATAAAAAACCCGAACCTCT  
CTTTTACACTTTCTTGCAGACAGCTTAAATAAAGCAAATATTTTATTTTGAACATCTGGATTATGTATACG  
CTGAGAACCAGAAGCAATTTATAACCAATTTAACACCAATCATAGCTCGATGAACGAACAGCAAAAAGGA  
TCTGAGTCTAAAAGCGAGATATCCCTCGTCTAATGGAGCTGTGAAAAGGATGATGCTCTGGACATAATCCGC  
CTTCTCTTTAGCAAAAAGCGGGAAGTCCGTGATCCATACAAAATATATTGCGTTGAATCATAAAGTTG  
ACGCTCTTTCGCAATCAACCTACGCAATGATCTAATGCCTGGTTAGCAACAGCCTCTGGAGCTGCTATT  
AACAAATAAATATCTTGGTCTTTTGCCTCAAAAGCTTCAAACATTTCTTGAATACGTCTTCCGAAGCGA  
ATTTGGCAACATTAGACGATACACCCCGTCTGTTTTTTAATCCATACTAACCCCATAGATCCATAGCG  
CTTAACGAAATCTGTATAGATATCTAAGTCTTCTAGACATATCTGCTCCGCCCGGAACCAAAAATCCCT  
TTAACTGTCCCACCGTGAGCTAATGATCTAAGAAAATCGAAGTGTGAATTTGCGTGCATATTCACAAC  
AATTTTTGAGGCGCAAGCCGAAACGTAATCTGGTGTGTCCGTTCCATAGGAGTCTTTAGCTTCTTGATA  
CGTCAATTCAGGAAAGGTGCCTTTAATTCATCCCTTTTACAGCAATAAACGTGTAACAAGCTCTTCT  
ACCCTGGAAAGAGATCCCTGTCGCCACCAAAGCTCATTTCCATATCGATCTGTGTAAACTCAGGTTGAC  
GGTCCGCACGCAAAATCTTCATCACGGAACAGGTGCTATTTGGAAATACCGATCCAAACCTCCAACCAT

CAAAATTTGTTTAAACAACACTGTGGAGACTGTGGAAGAGCATAAAAATTCCTGGATAGATACGGGAAGGG  
ACTAAGTAGTCTCTTGCTCCTTCCGAGTAGATTTTCCTAAGATAGGCGTAACTACCTCTGTAAAACCTT  
GTTCATCCAAATACTGTCTGCAAGCTAACATAACTTTATGTCCGACATTAATCTGTCCAAAATATCGCC  
ACGGCGCATATCTAAATAGCGATAAGTTAACCGCAGTTCCTTCGTTTACATTAATGTGTTTCATCAGAAATG  
GAAAAAGGAAGATTCGTGCCCCGAGACAACACTTCCAAGGAAGAAACCTCTACCTCAATAGAACCTGTAA  
CCAAATTCGGGTTCCTCCATCCCTCTAACCGAGCACAACAAGTCCCTCCACACAAAGCACCCACTCTGA  
ACGGACTTGATCCATAAGCTGATGAAGTTCGGGTTCCTCTTCGCGACACACTATCTGAGTAATCCCA  
AAGCGATCTCGCAAATCAATGAAAACAATCCCCCATGGTTACGGTAACGATGCACCCACCCAGACAAC  
GAACATGTTCCCCACATGATCAAGGGACAATCCATTACATTTATGCGTTCTGTACTTCATAAACCAACC  
TTTGTTCTACATCTTGTGAGCCCCGTGAGAAGCTTTGATGCAAAGACATATCTTTAACTATAAAATGTTT  
CGTTGCTAATTCCTGTTTCGCTAAGAGACAACAACAAGTACTGTTGATCGGCAGCATCTTTAAGAGAC  
AATTTAGGCTTCTTATGGCTCCAATCTACTTCTGTTGCAATGCC TAGGTTACGTAAACGATTTGCCCATG  
AAAAACAAAATGCATCTGCCTGCTCATCCATAGGAATTAATCGCAACCGTCGCGTAGAGGTGCATAAAGA  
GTTTCCTTGCTCTAATAGCGTTTGGATTAATCTTTTCCAATCCACTCCAAAACCAAAGCTGGCATAGAA  
GGCCTCCAGACTGCGCAACCAATTCATCATAACGCCCGCCGCTCCCAATGCATAGGAGCGCTCTCCCA  
CAACAGTCACCGCTTCAAATACAAGATCCGTATAATAATCCAAACCCTCGAACTAGCCTTGGATTGATTGC  
AAAAGGAATCCCTAAAGCCTTTAATGCGGCTAATACTGCATCAAAAATAGCTTAAATCCCGATCATCTATG  
TAATCCAAAATTGAGGGAGCTTTTTCAATGAATTCCTGGTCTTCTGGCTCCTTAGAATCTAATATACGCA  
ATAAGTTCGCATGATATCTTTCTTGACTCAGAGGCGATAACCGGTCTAGATCCCTTACGGAAGAATCCCG  
CAAAGCTTCGCATACGAGCCCGAGTCTTTTGGCCCTCCTAAAAAATTCACATGGATTTGCATATGCTGA  
AGCCCGACCGCTGCATAAAAATCCATAACAGAGAGACCTCCGCATCTCGTAAGGGGTGCCGCACAC  
CGATAGCTTCTAGACCGAAGTATGATGCTGACGGTAACGTCCAGATTGTTGCCGCTCGTAACGAAACAT  
GGCAAAATATAATAAAACTTATTATCTTTGCGCATATCAGCAGAATGATCCAAACATGCACGAACAAC  
GCTGCAGTCCCTTCTGACGCAAAGTCAAAGAACGTCTTTTTTATCTAAGAAGTATAAACTTCCTTTT  
TTACAATATCACTGTGTTCTCCGACGCGTAAAAAAGTCTCTGTCTTTTCAAAAACCTGGAGTTCGGATCTC  
ATCAAATCCATATAAATTACAAATACGATGGGCTGCATGCTCAACACGTTTCCATAGAGAAGAATTTCTC  
CAAAGATTTTTTTGGCTTGTACATAGGGAATAATCAAAAACGCTTTTGGCAATGCATTACTCATTG  
TGTATAACCGGACTATTCACGAAAAATGTTTCGTGATCTCACCTTTTTTAAAGTCTTTTTTTTGGC  
AGAACGAGACCACTATGTTACACCAAAAAGAGTTCAGGACTACTCGAAAACCTGCTCCTTTTCTCTCTA  
TTATTTCTTTTATTTGACACACCTTACTCTCCGCTTATCCATCCACAATATGCCGCATCCCTCACCCCTAC  
TCCTCTCTTTTACACAGCAAATGTATTGCTTTCTAAAAGCTATTAAGCTAAATGAAAGAAGTGTGACGA  
CATTACTACAATTGTCCAATATGATGCCCGGGCTGGTCTAGCCTAGACTGATAGCAAAAAACGAGGTCTT  
AGAAGCTGATACCTTCTGCTCAGTATGCATTTGTATTTTCTTAAGCTTCTAGAGCAAACACACTTGAAT  
CGAGCTAACACCTATGAATCTATGGACCAAATTTTTCAGCCTCCTTGCCACATTAAGAAATCAGTGGC  
CCGGAGTTGGTAAAAAGCAGTACAAGTACTGGAAGTGCCTATCTTCTACAGCATGTTCTTAGGGTACG  
TGTTCTTCTACTTTACAAGGAAAAGCTTACTTTTGGCATGCCAACCTTGATCGCTGATCTCGGGTTGA  
TAAAGCTCAGCTAGGGATATCGGTAGTACTCTATATCACTTACGGCATTAGTAAATTTGTAAGCGGT  
GTCATGCTGACCACTCAATCCCTCGCTATTTTATGGCTATTGGATGATTATTACTGGTATCTCTAACA  
TCTTCTTTGGTCTCTCTTCTACAATCCCTCTGTTTGTATTGTTCTGGGGAATTAACGGTTGGTCCAAGG  
ATGGGGGTGGCCTCCATGCGCACGATTGTTAACTCACTGGTATTCCAAATCAGAGAGAGGAACCTGGTGG  
AGCGTTTGGAGCACTTCTCATAATATAGGGGGAGCGTTGATCCCTGTTCTTACCGGAGTTGCTATTGACT  
ACACGGGGTGGCGCGGCTTATGTTTATCCAGGGATATTTTGTATTATCATGGATTTATCTTAATCGA  
TCGTTTGGGAGACTCTCGCAATCACTCGGGCTCCCCGCTATAGAAAAATTTAGAAAAGAAGAGGATGCG  
CATCCACATGAAGAAACAACCTGCAGATATCTTAGAGGAAGAGGCAGAAAGAGAGCTCTCTACAAAAGAA  
TCTTGTTTACTTACGTACTATCTAATAAATGGCTATGGTTTCTGTCTTTTGCCTCCTTCTTTATTTATGT  
GGTTCGCATGGCAGTAAATGATTGGAGCGCTCTCTATCTAATCGAAACAAAAGATTAATCCACAGTAAAA  
GCAAATCTCTGCGTATCTTTGTTTGAATTTGGGATATTTTGGTATGCTATTAGCGGGCTGGCTATCCG  
ACACGATTTCCAAAGGAAAACGTGGACCAATGAACGTAGTCTTCTCGCTAGGATATTAGTTTCCATCTT  
GGGATATGGGGTACTCGTGATTACTTCGTTTGGTGGATAGATGGAACATTCCTATTTATCATTTGGTTTT  
TTCTTTTGGACCACAATGATGATTGGATTTGGCAGCTGCAGAATGTCTCATAAAAAAGCAGCTGGAA  
CGGCTAGCGGCTTTACAGGATGGTTCGCTACTTCGGAGCAGCTTTTCGCCGGATATCCCTTTAGGGAAGGT  
GGCTCAGGATTTGGGGCTGGCACGGATTCCTTTGTTGCGCTCTTAGCTTGTGCTTTGATTGCGCTGATCCCT  
TTCTTGCCAACATGGAATGCATCCGAACAAGTGTGAGAAAACATAGTCACTAAGTGAAGAGCTGTTTTG

ACCTGGATTCATTACATTGCCACTCTCAGTATTCATCTTGGATGCAACATGCTCAATCAAGAAGTTTG  
TTGCCAAAGCAGTGGAATATCAAATTC CCGCGCTCGCTCTTACCGATCACGGGAATTTGTTTGGCGCGGT  
CGAATTTTATAAGACCTGTAAACAAAACGCGATTAAACCTATCATCGGGTGTGAGCTATACGTGCGACCC  
TCTTCTCGTTTTCGATAAAAAAAAAAGAACGAAAAAGCCGAGTTGCCAACCATCTCATCCTTCTTTGTAAAG  
ATGAAGAAAGGTATCGCAACCTTTGTTTGTCTCTCTCTTGGTTACACAGAAGGTTTTTACTATGTGCC  
TCGCATAGATAGAGATCTTTTGGAGCCAACACTCCAAAGGACTTATCTGCTTATCAGCCTGTTTATCCGGA  
TCGGTTGCTCAAGCTGCATTGGAATCTGAAGAAGATTTAGAAAAAGATCTTTTATGGTATCAAGATCTGT  
TTCAAGAAGACTTTTTTCAGTGAAGTACAACTCCACAAATCCTCAGAAGAAAAAGTTGCTCTATTTGAAGA  
AGCTTGGTTAAAAACAAACTACTATCAATTCATTGAGAAACAATCCAAAGTAAATGAAGCTGTTTTAGCT  
ACTTCTAAACGCCTTGGTATTCCTTCAGTTGCTACAAATGATATTCACTATTTGAATCCGGACGATTGGC  
TCGCTCATGAAGTTTTACTCAATGTTGAGTCTAGAGAGCCTATTCGGACAGCTAAACAAAATACTTACAT  
TCCCAATCCTAAACGCAAAACCTATCCTAGTAGGGAATTTTTATTTTAAATCCCTCAAGAGATGGCAGAG  
CTATTTGCAGCACATCCAGAGACTATTACCAATACGTGTATCGTTGCCGAGCGCTGCCACCTAGAGCTTG  
ATTTTGAACCAAAACACTATCCATCTACGTCCAGAAGCTTTACAAAAAAAAGGATCC TACACAGAAGA  
GGAGCGCTACAAAGCATCCTCAGCCTTCTTAGAAGAACTTTGCGAGCAAAGGATTAACCAGCAAATACACA  
CCCAGCTTCTAGGACACATTGCAAAGAAATTCCTGGGGAAGACCCCTTACGCTGGTTAAAGAAGCTC  
TCAAATTGGAAATCCCTATTATTATCTCCAAAGGGATGTGCGATTACTTGTCTATTGTCTGGATATTAT  
TAACTGGGCAAAAGATCATGGGATTCCTGTTGGCCCCGGTCGAGGCTCTGGAGCGGGCTCTGTCAATGCTT  
TTCTTCTGGGGAT TACTGAAATAGAACCAGATTCGCTTCGACCTTTTCTTCGAACGTTTCATCAACCCGG  
AACGGATATCGTATCCCGATATCGATATCGATATCTGTATGATTGGCAGAGAGCGGTTATTAACCTATGC  
TATAGAACGTCATGGTAAAGATAATGTAGCCAAATTTATTACATTTGGCACCATGAAAGCCAAAATGGCT  
ATTAAGGATGTGGGTAGAACTTTAGATACCCCTTAGCTAAAGTGAACCTCATCGCGAAACATATTCCTG  
ATCTTAATGCTACCATTACTTCGGCATTAGAGGCTGATCCAGAATTAAGCAACTATATGTAGATGACGC  
TGAAGCTGCAGAAGTTATTGATATGGCTAAAAAAGTAGAGGGATCTATCCGCAATACTGGAGTGCATGCT  
GCGGAGGTGATTATCTGTGGAGATCCCTCTCACTAACCATATCCCGATTTGTGTCCCTAAAGACTCATCCA  
TGATTTCTACTCAGTACTCAATGAAGCCAGTAGAAAGCGTTGGCATGCTTAAAGTGGATTTTTTTGGGTCT  
AAAAACCCTAACCGGCATTCACATCGCCACACAGCGATCTATAAAAAAACAGGCATTTCTACTCCGGGCT  
GCCACGATTCCTCTAGATGACCAGAATACTTTCTCTCTTCTTCATCAAGGTAACCATGGGGATCTTCC  
AAATGGAATCTCGTGGCATGCAAGACCTTGTAAAAACTTACGCCAGATGCGTTTGAAGAAATTATAGC  
GATCGGAGCCCTCTATCGCCCTGGCCCTATGGATATGATCCCATCATTTTATCAATAGGAAGCATGGTAAA  
GAGAATATTGAATACGACCATCCCTCTCATGGAACCTATTC TAAAAGAACTTTTGAATTTATGGTTTACC  
AAGAACAAGTCATGCAGATTGCCGGTTTATTAGCAAATACTCTTTGGGAGAAGGGATGTTTTACGCCG  
CGCTATGGGAAAAAAGACCATGAACAGATGGTCAAGGAACGAGAGAAATTTTGTCAAGAGCCGCAGCG  
AATGGCATCGACCCTTCCATAGCAACGACTATCTTCGATAAGATGGAAAAGTTTGGTTCCCTATGGATTTA  
ATAAGTCCCATGCCGAGCTTACGGTCTTATAACCTACACAACAGCATATCTTAAAGCCAACTACCCCAA  
AGAATGGCTTGGCCCTTCTCACTTGGGATTATGACGATATTGAGAAAGTCGGGAAGCTAATTC AAGAA  
GCTCACAGCATGAACATTCCTCGTTCTGCCTCCTGATATTAATGAGTCTGGACAAGATTTTGAAGCCACTC  
AGGAAGGGATTCGCTTTTCTCTAGGAGCTGTCAAAGGCGTTGGAATGAGCATTGTGGATAGTATTGTTGA  
AGAGAGAGAAAAAACGGCCCTATAAAAGTCTGCAAGGATTTCTGTTCAACGCGCAGATTTTAAAAAAGTC  
ACTAAGAAACAGCTTGAATAATTTGGTGGATGCAGGAACCTTTGACTGCTTCGAACCTAATAAAGATCTTG  
CGCTGGCTATCCTTAATGACCTTTACGACACGTTCTCTAGAGAAAAAAAAGAAGCTGCTACAGGAGTCTT  
AACCTTTTTTTTCACTAGATAGCATGGCTAGAGATCCTGTTAAAAATTACTGTCTCTCCTGAAAATGTTATC  
CAACGCTCTCCTAAGGAGTTGTTGAAAAGAGAAAAA GAATTACTTGAGTATATTTGACTGCCCATCCTA  
TGGATGCTGTTGAACACATGCTCCCTTTCTTATCTGTAGTCCCAGCTCGAGATTTTGAAGGACTCCCTCA  
TGGAACCATTATTCGTACAGTCTTTCTAATCGATAAAGTCACTACTAAAATTTCTCTGCAGAGCAGAAA  
AAATTTGCACTTTTACAAGTCAGCGATGAAGTCGATTCATATGAACCTCCAATCTGGGCCGATATGTACG  
CCGAATACCATGATCTATTGGAAGAAGATCGTCTTATTTATGCCATTTTGGCTATAGATCGACGTAGTGA  
TTCCTTGGCTCTATCTTGTGGTGGATGCGAGACTTATCTACCGTTAATGATTCAGTAATTGCGGAATGC  
GACGAAGTCTATGATCGACTGAAAAGTCAGAAAGTATACTCTTCAACGAAAAAATCAACCGGAGCCAGT  
CCTCAGCAATGATAAAGAAAGTAGAAACTAGAGAGATCTCTCCCGTAACCATCTCTTTAGATTTAAATAA  
ATTACGCCATAGCCACTTATTTATTC TCAAAGGGCTGATACGCAAATATTCGGATCTCAAGCACTCTCT  
CTTGTATTCACAAAAGATAATCAGCGGTTGCGCTCTATCTCTCCAGATGCAGATTTTTTTCGTAACAGATG  
ATATCTTCTCTTCTTCAAGAAATGAAGCAACCAATATCCCTGCTCGGTTCTAGCCACTACAGTATA

ACTATTTAAAAGTGAGATGCTCCCCTCTTTGGTAAGATCTCTACATAAGTCTCTTGCCTTTACCGCACTT  
TGTCGTGGCGATCCAGACAATGGTCTCCTAAATCC TATACCCGACTAAAAAATTTGAGGCTCTCTAGCA  
AACGAAGCGGAGCTACTCACCTTCATTTCAAGAGAGATCTATGAAAAAGCTATGCGCGGAAGGAAAA  
AGAAAAAAGAGGTCTGTGCTATTTGCAGTATGTAGGAGCGAAATCGAAAGGTTCCCTGTAATAGCATT  
AATATACTCAACACGAACACTACTATCCGAAGCTGCAATAGAAACCTTATATACCGGAACGTGAATCTGT  
TCAGAACTCAAATAAAGAAATTATCGCCAAAAATCATTTCACAAGATTTTGAATACGATCCCTTGGAT  
ATACCACGGAACATACCGTAGATCCTTTCGGTTTTGCTAACCAACAGGAGATGAATGAATACAGTCAT  
GCATCCCTTAATTGGCTGAGGCTGCTGGAAATGACTGTAAATCAAATTATCATGAGTAAATATTAATTC  
TTCTTCTGACATGCACGAATCACACGATCGGCACGAACATTACGCATAGACAATGCTTGTGAAAAGAACTT  
CTCTCGATGCAGATCC TCCCATAACAGCTAAAACCTGCATAAGCTGCACATCTTGTTCCTGCTTTTAA  
CATGAGGCATTC TCTAAATCC TTTAGAGTATGTCCAAGATCCAGTATTC AACACCATCTCTCCATTAGAC  
AAACTC CAAAGCATAGCTCCTTCGTGACTTCCAGCACGTTTATCTTCTTCCCCGAAAAACGTACACGCA  
TAAGGACATGAGGAACAATAACAATTC TGCAGACGTTTTGTCTTTGGCAAACATGGCTAAGACCTGTTC  
TTCCGATACACGCTTTTCAAATACGCATAAGCGCTCATTACCTGAAATCTTACGAACATAATTGAGAACTT  
TTTTCAACGAGTTCGATCCGTAATCCATAGCAAATTTGTTTGATTC TATGTGAATAAGGGATCTTATCCC  
AAAAACAATAGAACTAAAAATAGCCGCAATAAAAACAACTTTCTTCATAACCC AACCTTTTTATTTATT  
TTAATAAATAAAAAACAGCGATGCCAAATAAATTTTTTTGTTTTTGTAAACAAAAGCTATAAGAGATTTG  
ACAAAATTC TCTTTTTCTTTTTTATGATGACGCTTTGTTATTATTGTCCCTGCGTCTAGCTATGAAAGTCA  
TTTTAAGAGCGCTTTGCTTGTCTTGTGTTGCCCTGCGGATGTTATGCGCGAGTGCCTCTTTTGAACC  
TTTCCGAGGCGCTATCGCCCCAAACCGGTACATTCCTAAACATTC CCCAGAATCT TATTTGAGATGGGA  
GATAAATACTTTT CAGGCTAAAAAATTAAGCAAGCTCTTCTTTGTTTGAATGATAACACATCATTTCC  
CAGAACATGCTCTTCATCC TAAAGCACAGTTTCTTGTAGGGCTCTGCTATCTTGAAATGGGCCATCC TGA  
CTTAGCGGATAAAGCGCTAACTCAATATCAAGAGCTCGCCGATACA GAATATTC TGAACAATTATTCGCC  
ATTAAGTATTC TATCGCACAAAGTTTCGCTAACGAAAGCGTAAAAATATCGTTCCTTTGGAAGGGTTTC  
CTAAGTTGTTGAAAGCAGATACAGATGCTCTGCGTATTTTTGAAGAAATTTGTGACAGCATCTTCCGACGC  
AGACCTCAAAGCTTCTGCTCTCTACGCAAAGGTGCTCTTTTGTTCGACCGAAAA GAATATTC GGAAGCG  
ATCAAAA ACTCTAAAAAAGTTTTCTCTTCAGTTTTCTTCACACTC TCTTTCTCCAGAGTCTTTTACCTTA  
TTGCAAAAATCCATTGCTTACAAGCTTTGCAAGAGCCCTATAATGAACAGTATCTTCAAGATGCTCGGAT  
GAATGCAGCAGCTTTACGTAAACAAC ACCCTAATCATCTTAGCAATACAGAAGTAGAGA ACTATATTCAT  
CACATGTGCGAAGCTTACGCTTCTTGTCTTATATTC AACCGGACGCTTTTTATGAGAAAAAGCGAAAAGCCT  
CTTCTGCAAAAATTTATT ACTCAATAGCTCTAGAAAAC TTCCCTGATACCTCCTATGTCGCTAAATGCAA  
TAAACGATTAGAACGGCTCTCTAAACAATGAGT TAAGCGAACCAAAGGGAAACTTCTTGCATGCTGAAA  
ATGTTTTGGTTGAATAGCCTCGTTTTCTCTCGTTACTACTATCAGCCTGCGGCTATACAGTGTCTCCC  
CCCCTATGTAGAAAAGAAATTC TCGCTTTCCGAAGGCATCTATGTCTGCCCTATCGAAGGAGATTCATT  
AGGAGATCTCGTATCC TCTCTTTCTTAC GAAT TAGAAAAGCGAGG ACTCCACACACGATCTCAAGGAACC  
TCTTCTGGTTATGTACTCAAAGTCTCTCTTTTCAATGAGACTGATGAAAATATTGGATTCGCATACACTC  
CCAAAAACCTGATGAAAACCTGTAAAACACTTCATTGTCTCTAATGAAGGGCGCTTAGCGTTATCAGC  
AAAAGTCCAACATAATCAAAAACCGCACACAAGAAATATTAGTGGAGAAATGTCTGAGAAAATCGGTTACT  
TTTGATTTTCAACCTGACCTCGGAACCGC GAATGCTCATCAGCTAGCTCTCGGACAATTTGAAATGCATA  
ATGAAGCAATAAAAAGCGCTTCTCGTATATTGTATTC GCAATTAGCAGAGACTATTGTACAACAGGTATA  
CTATGACTTTTTCTGAAGGAGAGCAAGTTTTTCCAGCAACATTACAAGATCTTTATCC TATGCTCGATTT  
TGTCAAACGAGCAGGCGTCCACTGTAACGTACTCAGAAAAACTATCGAAGCTAGAGCTTGTGTGAA  
GAACTTCTCTTAAATATTATCACCCATGCCTATAAAGGGCTTCTTCCACAGGATGGATCCGTATTC TTT  
GCACAGAAACTC CAGATGCTCTTTTAGTTCCGGAT CACAGATCATGGCCCAGCCTTTAATCC CATAACCGC  
TTCGCCAGACATCATGCGCCTGGATCTACCTATTGAGCAAAGAA GAAT TGGTGGACTAGGGATATTTCTA  
GCAAAAATACTCGGTGGATGTTTTTGTATTATGAGAGAGT TAACGACACAAATGTTGTC ACTCTCACTCTAT  
ACACAAAACCTCACA ACTCATAGTCTAATCTATCC ATCTATTGAAGGCGGGCGTAATGCCCGTAATTC TTT  
TTTTCTGTATCCCTGGATATCACACAAATATCTTCGCAACGCCTCTAAGATTAAACTCGAAT TATTATACTT  
TCCTGATGCTTCAAAAGCTAATTCAGGAGAGAACTCTTACCC TGGTTTAAAGCGATGTAGCCGC GAGTA  
ATTGCCTCACCATCAACTAATGTAGGTACCAACCACACAGCAAAATTTGTGTTAAATAAAGT GAGT TTTAT  
CTGAAGATTC TGATACGATGAAGTCATTAACAGCACTGTCAGCAAGTTCCCTCAGCCTTAAAATCTAAGC  
CGAACGAGCTAAGACATCAGATATATCCAGAAAAGCCTTCTGGAAAAGCTGTGTTGTGATTGGTAATTGAG  
CGACGGAAAAAATCC TCTAAAAAATCTAAACTC ACTGCCGTTTTCTCTTTCTCAA GGGTAATTTGTTATT



GAAGGCACCGTCAAGAGCTTTTTTGTATATTCATAAGTCGAAATTC TTAGAAAGCAGACCATCAGCAGGTT  
CCATGCGTACTTTTTTCTTGTGTGTCGGTCTTTATCTGCTTGGCTCCCTTTTTTCTCTCGTTCCCTTT  
GTACGCAGATCC CCATACTGTTCTTACAAAAGGAAT CGCAGCCGCAGTCGTTTCATGCAGATTC CGGAGCA  
ATTC TGAAAGAAAAAATCTGGAT CACAAGATTTTTCCTGCAAGCATGACCAAGATTGCAACCGCTTTAC  
TCATTTTAAGGCAGTATCC TGATGTGTTAACTC GTTTCATCACTACTC GCAGAGAGCCACTGACTTCTAT  
CACTC CTCAGGCTAAACAACAATCCGGATACCGAAGCCCTCCCATTGGCTAGAAACTGATGGTATGACT  
ATTC AACTAAAAGTGAAGGAAGAGGTGTCTGGAT GGGACCTTTTTTCACGCTCTACTTATTAGCTCTGCAA  
ATGATGCTGCCAATGTTTTAGCAGATGCCTGCTGCCAAGCGTCTCTGCTTTCATGCGCCAACTTAATGA  
GTTTTTGAGGGAATC GGTTGCCAAAATACTCATTTTAATTC TCCTCATGGACTC CATCATCC TGATCAC  
TACACGACGGCTAGAGATCTATC ACTCATCATGAAAGAAGCTTTAAAAGAGCCCTTTTTCCGCCAAGTCA  
TTC ACACAGCGTCTTATACCATGGAGGCCACCAACTTAAGTCCAGAAA GAGT TCTGTCTTCCACGAACAA  
ACTTCTTTCTTCTCTTTCGACTTACTTTTT ATCC ACCTTGTTTAGGAGGGAAAAACAGGAACACAAAAAGT  
GCAGGGAAAAATATCATTTTTCGCTGCAGAAAAGAACAATCGCTCAATTATTGTTGTAGCAGCA GGAT ATT  
TTGGCCCTGCTGCTCAACTATAACCAAGATGCTATAGCTCTGTGCGAAGATCTATTTAATGAACAGCTATT  
ACGATGCTTTTTTAATCC CTCCC GCAAGTCACT ATCC TGTACCAACTC GATTTGGCAC TGTGACAGCTCCG  
GTAGCACAAGGCATTTATTACGACTTTTT ATCC TTCTGAAGGAGATCC CCTCTTAACCC TTTCCCTAGAAC  
CC AATAAGATCTCTTTCCCATTC GGAAAGGAGATCTTCTAGGCCATT GGAT TTTATCCACCC CTACTGG  
AGAGAAT CAACATTC ATCC CATTC CTAGCAGAGAGCGATATCC TCCTACTTTAAAGCAACGAATTC TT  
TTAAT GAGT CTTTCGTATACTTACCAC TTATAGAACTTACGTTCTT ATCC TACTC TTTGTTT GGAT CTATC  
GTAGGAAAAAGCAACCTCGTGCAGAAAAAATTTTTCTA ACCC TTTTTTCTCTTA ACTCTCTATCTAAGA  
AATCTTTAGCGGACTTTTTTTCTGCTTTTTTTCTAAGATTTCCGGTTGTTAGAGAAAGTCTTTTTTCCCTGT  
CCCGTCTTTTCTCAAGAGCTTTTGTTCAGATTGCGTAAAAGG ACTC CTATGTTCAATAAATCTTTTGTTC  
ACTTGTGCTGCTCTTTAGTCTT ACCC CAACCGGGCTCTTCTCTGCTGCGCCCATCTCCGCAC ACCC ATC  
TGTTACGAAAAAGCTCTCATTGCGGCAACTATTC AAACGTTTCTTCCAGAAACCTCTCATAATAAAAAA  
GAGCGTACTACCATTTCTTAAAACATGTAAGTCAATGCTCTCAAACGTCCCGAAATATG GAAT GATTTAC  
AAAATCTTCTCCTT ATTC TCATGCAATTC GAGCAGTTTGCCAATCAAGAAGTAGTTCCTCGCCGTTATGA  
AGAAATCC TTTTCGCAAATAATAGAAAAAAGAATTC ATTTCC TATT ATCC GAGCAACAGGTTTCTGAACTT  
ACCGATAT ACTC GCTCCCAACCCAGGAGACCTATG ATTC CTTTTCGCTTCCATCATCTCTACATTTTGTCT  
CGATAGTTTT ATTC TCTTCCCAATAGGAGAAAGCAACCGTGTAGCTGCGTACTTTAAAGAGC ATCC CTCT  
CTTGGCTCGAAGGACCGTCAAT GGAT CAATACTC GTATTTTTTACCATCTTACGTCACCGCCGTTTGTAG  
AAGCTTTGGTCTTAGCAGAGGGGAAAGAAATCTCTGCACAAACATTAGTTGAAAAGGTGGAAGAGG GAGT  
CACCGAAAATATTGAGCAATTTCAACACCTGCCTTGGCCTGTTGCT ACTC CATATCGGACGATCTAGCA  
GAGT GCTTAACAAC GGAT TACGGCGAGGAAGAAGCT ATCC GTCTAGCCAAAATATTTTTAGAAGAAGCTC  
CTTGCTCC ATTC GTGTAATACTC GAC GAAT CTCTGTAGATAAA ACTC CAAAAGGTTCTGCCTTTCCCTTG  
TCAAAGAGGCGCGCTCCTTCTCATTTGCGTTTTGAAAAACGCT ATCC TCTGCAACACACAGC ATTC  
CGCAGAGGGCTCTTTGAA ATTC AAGAT GAATCC TCTCAAATCATCACAATGCC ATTC TAATTAAGATT  
CCGATACTGTTTTAGATTTCTGTGCTGGGGCTGGAGGGAAAAGCTTGATCTTTGCACAACGCGCTCGCCA  
CGTGACCTTACATGATAGCCGTCCGCAAGCCTTAGAGGAGGCTCGTCACCGCCTCCCGCGATCAG GAAT  
AAAAATTTTACT ATTC CATCTCAACCTCTGAAAAAACACAGTTTCTCTCTAGTCGTGGTTGACGCTCCTT  
GCACTGGAAGTGGCGTCTTCCGCCGAC ATCC AGAAAAAAGCTTCTCTTCTCCAAACA ACTC CTCCATAA  
CAATTC GATTGCTCAAGAAAAGATTTTAAAAGAAGCCTTAGCTTATGTCGCTCCACGCGGACGCTTGGA  
TACATCACCTGTTGCTTATGAAAGAAGAGAAT GAAAAACATAACCTCTT GGAT GGCTCCCAA GGAT GGA  
AATGCGTGAAAGAAGTGAATAATTC CGTAGTTTCCCGACAAGG GGAT GCTTTTTTCTCGTCGCATTTTTAT  
CCGATCTCGCTCGCTCTA GAAT CTGATCTTAAACCATCAGTGCAGGTAATAGGACGAGGGCTAACGG  
ACGTTTCTTCTA ATTC ATCC TTTTCCAAAGA ACTTCTGTGACTTGGGAA GGAT GATAT ACCC TC  
GTATAAGTAAAAATATCATTTTTTATCATGCATAAGAAAACACAATCAC ATTC TCATAAAGGACTTTCC  
ATTTGGTCTATTGGA GGAT CGATCTTTGCTATGTTCTTTGGAGCAGGCAATGTGGT ATTC CCTTTAGCCT  
TAGGACACCACTTCTATTATCATATTTCTTACGCTTGTGTTGGGT ATG ATTC TGACAGCCGTA CTACGCC  
TTTTATTAGGTCTGTTGCGATGATGCTGT ACTC TGGAATTAACCGTTC ATTC TTTGCTTCTATTGGA GA  
ATGCCTGGTATGGTGTGATGGTTGCA ATTC TATGCATTATTGGCCCTTTCCGGG GAATTC CTAGA ACTA  
TTGCTGTGCTTACGATACGCTAGCCTCGTTGGGAGACAAAC ATCC TACATTA CTCTTCCCTACCTTG  
GTTTAGTGTCTTCTTTTGCCTACTTGTTTACCTCTTCGTTTGCAAGCTCAGCAAGCTG ATTC AATGGCTG  
GGGT CCGTTTTTTTTCCCTGTCTATGTTAGGAACTTTAGCCTGGCTGATTATCAAAGG ACTC TACTGCCTG

CTCATGCACTTCCCTCAGAAAGCGTAACCTTTTCGAAGCAACAAGCCTTTGTTACAGGACTTTCGGAAG  
TTTTAACACTATGGATTTATTAGGAGCCTTCTTCTGCTCCATAGTCCTTGATCAATTCAGCAACTT  
ATGGTGCAGCAGAAGCATGAGTCTTCTGAAGAAAACCTTTAGAGTTCACCATATTGGGAAGACTGAGA  
AATACAACTTGCTATGAGTTTTCTTTTAGCAGCCGCGCTACTTAGCCTTGATATCTAGGCTTTGCCTT  
CTGTGCTGCCCGTCATGCGGGAGCTCTGATAGATGTTCAAAGAGGGCAAATTC TAGGAA GAAT TTCGGCT  
CTTGTAGTTGGCCCAATAGCTTTTAAACAGGGCTGAGCGTCTTCTTGCTTGCCTAACCACTGCAATTG  
CAGTAACAGGGATTTTCGC GGAT TTTATCGCGA GAGT CGTTTCTTCTCAAAAAATGAGTTACTC CAATGC  
TTTAATCGTTACTTTGGTTCCTACATACCTAGTATCGATTCTTAGTTTTGAGAATATTAGCAAGATTC TC  
ATCC CCATTTTGGAAATGAGCTATCC TGC ACTC ATAGCATTAACTTGCGGTGTTATTGCGAAGAAGCTTT  
GGGATTTCCGCCATGTGAAAACCTTATTTTATCTTGTTTTTGCACCTACGATACTC TATAAGCTGTCCGT  
TTAATAGACTTAGTCGAATGTTTGAAGCCATCC CTTACTGAAT AAGTAAGGGAT GTTCTTTTGTCCGA  
AAGCA ACCCAAAAAACGCCTTTAGAAGACACCTATCTACTCCTAAAC ACTC GTTCCTTTCTGCC TAGGTC  
ATGCGCAAGCATGGGAACGTAACAGAGATTGATTC TTATGATTC TAAATTC CTTATCC ATGTTTCGTCAT  
CAGGCT ACCCGTTTCTTACAAGATAATCGAGACTC CATAGCCGTTTCTTTTTCTAAAAACACTTACAAA  
TCACGATTCCTGATGAAGACTC TCC GGATGGAGAATGGATCAGC ACTC TATCATTCAACGATGAGGAGCG  
TTTGTCGTTTGCAGCTTGTAGCTGCCAGATGGAGACTGCTGCGAGCACCTCCTTACCGCTACCTTAGCA  
GCTTACG ACCCAACAGAAGGAGCGCTTCTTCATGTGAAATTT GAATCC TCTTTTTGGTGGGGGT TATTTT  
ATCAATTAATTCCTAAGTAAGGCTCCTCTACACGCCCGGGAGACAAAGTCTATAACCATAACAATCC CAACA  
ACTTTCAGTCTCTCTCCAATGCCTTTCTGCAGAAGCCTTAACTTATTGGCTGCCTATTGTGCACACCTCT  
CCAGAACCTCAAAACAATATCTAAAAGAAC ATTC TCCCAATCC GCATTATAACC GAAT CGCACGAGA ACTAT  
TCATGTTCTCTCAAAAAGGAGCCTCTTTAGTTATCC AAGAAA ACCCTCAAGGATTC CTTCTTTATTC TC  
CTTGCACTGGGAAG GAATAGCTCTATCTATTGAAGTCC TAGATGTTGAT ACCCTAAAAGCATTGTTCCCA  
TTACTG GAATTC TCACAAACCTCTTTATATAGTGGAGAGCCTTATCTTCTTCATAACGTCCACGTGGTCC  
CTGAACAAGCTAGGATCTATTTTACAAA GAATATCC GCCTCTCCCTAAGTCCATTAAGAAATATCAAGA  
GACGGTCTGGGCCCTATTAAGTATTTGCGCGAAGCAAAAAAATGCACCTCTATTCCTAAAACACTCTCC  
CTCCCATACATATTATCC CCGCTCTAGACCGTTCTTTTAGAGAACATTTACTCTCCCAACTCTGTTATG  
AAACTGAAGAACGCCCTATTC ACTATGCTATTC ACTTCTTAAGAGACGCCTCTCTCATTTCGCGATA  
TCTAGAAACACCAGGAGATCTGTCCGAGGGGCATATTATCTATCC A GAATTC TGCTACATTCCTAATAAG  
GGTCTATTAGCTGTATCTGGAT TATTATCC CAGAATCTTCGTTACCATAACGCTCCGACCATATCGAAA  
ATTTCTTGGATGAGTATGGGCCCTTTTATCAAAGAACCTGGATTCGAAACGTTTTCTAACCAATCC CCGGT  
AGGCTCTCTGTCTTATAACGTTACTGAACAAGGAGTCTTCTATTC CATTATGATACTGGGAACGCTGCG  
GATATAGA ACTC CGTTTTGGTAAATGGACGTATTATTC TCGACAAGGATTC TTTTAAACAGCCGATTAG  
ACTTAGCTCTTCAAGATGGATTGACGATAGAAGCTCCACAAGTCGCGGATTTTATTC TTACACATGAAGT  
AGCTCTTAAATCTATCC CCAACTTCTTTGCTGCACAACCACCTCTCAAATCCATTC GCTTTGAAGTGCAT  
AAAGAGAAAAAAGGATCTGGAATCTATTTACAGCCTATCTTTGAA GGATTGGAACAC GAATCTTGTGCT  
TGTTTGGTCAATTTTATATCGCGAAAATGTAGGCTTTAGTTTGTCTCCCTGCAGCCTTACAAATGCTCTG  
TCAAATTCCTACAGAGATTCCTGCCGATCAAGTCGCTGAATTTTTATTACAATTTCAAAGATGATCGC  
ATGGTGTCCCTGATCC TCAATTAGCTCTTCCAGAGCGTGTGAGCTGAATATCC TGGCTATTCACAGAC  
CCATCCGTCTTACCCTTTCATCTAAAAATAGAAATTA AAACCAATATTGGATCTATTCCTTTAGGGAC  
AGTATTACAAGCTTTGAAAGGAAAAAAGACTTCTTATTCAGCAAAGCAGGATTTTTGAATCTCGATAAC  
TGTTTATTTGTTTTCTGAAACAATTC TTATCGTCTCAACGCTATGATATTC AAGAAAATACCC TCATCA  
CCATGGTGACAGACATCTCAAATTAGATGCTCTGGCACCTATGATAACAGACCC TAATATTC AAGCTTC  
GGAAGAAGATTTGGCGTATTTCTCCAGTTGAAATCC GCATGTCTGCCTCCTATTCCTGTAAACTTATTT  
TCCACGGATCACAAA ACTC CGTCCCTATCAAATAGCGGCTTATTATGGCTGTGGTTTTTTGTATAACCATC  
GGTTATCTGGACTGCTGTGCGATGAAATGGAT TAGGGAAAACACACCAAGCCACAGCTTTACTAGATAT  
TGTGGCGCAAACCTGCAAAAAATCC TAAATTTTTGGTTGTTTGTCCAACAAGTGTGTTGCCGCATTTGGAA  
CATGTATTAGCTTCGCACTTACCTCAAGCTTCTCTTTTTCTTCCATGGTCCACAAACCTAAA ACTC  
TCCCTGATTGCGATATACTCATCTTCGTACGGGACTTTAAGACAAAACACTACGCTTATTTTATAAGGT  
ATCGTTTACAGTTGCGGTATTTGATGAAATTC ATACAGCTAAAAATAAATCGAGCCAAATCCATAAAAT  
CTTTGTGCTTTAGATGCGCAAATGAAGCTAGGCCTCACAGGAACGCCTGTAGA GAATAACTTGATAGAAT  
TCAAAGGACTTTTTGGATATTATTTTACCAATTATCTCCCTTC GGATGCCCTCTTCAAACGATTGTTTAC  
ACATAAAAAATGCATCC GAAACAGATGAAGATATTATTTCTTCTAAAGACTTACTACTTAAGCTTACTCGG  
CCATTTATTC TAAGAAGAACAAAAA ACTCGTTCTACCAGAGCTGCCTGAAAAAGTAGAATCGCTGATTC

CTTGTGCGACTCTCACCAGAACAATCTCAACTGTATTC TTCGACTTTGGAAAAAGAAAAATGCCAAATCCA  
ACAACTCGAAAAAGAGGAGGATCCGGCTTCTGTAACTACTTGCATGTATTTGCCTTGCTTAACCAACTG  
AAACAGATCTGCGATCACCCGTCAGTGTATTTCAAAGATCCTGAATCATACAAAAACCATTCCTCTGGGA  
AATGGGCTGCTTTTGTGAAATTACTCAACGACTCTCTGGCTTCAAGGATACAAAGTCGTTGTCTCTCTCA  
GTACATCCAAATGATCCGCATTATGCTTTGTATCTGGAAGAGCATGCTATCGAATATGCTCTAGTACAA  
GGGAAATCCCAAATAGAAAAGAAGAAATAGACCGTTTCTCAAATGATCCCAATTGTCTGTCTTTATAG  
GTTCTTACTTGTCTGCAGGAACAGGGATTAACCTAACGGCTGGAAATGTAGTGATCATGTATGACCGCTG  
GTGGAACCCGGCTAAAGAAAATCAAGCTTTGGATCGTGTACACA GAATCGGGCAAAAAAATACCGTTTTTC  
ATTTACAACTAGTAACGGAAGATACCCTCGAAGAGCACATTC ACTACTTAATAGAGAAAAAATGCGCT  
TACTGAACCAGGTAAC TACAACCC AAGATTC CAACATCTTGCATGTTTT GAATCGCGAAGACTTAATTAC  
CATCC TCTCTTACAAAGACGAACATATGCTATCTGAAGAGGTGCAAGAAGACTCGGGTGATTC GTAAAAA  
AAGAAATGATTGACCTTTTATTC TCTTTTTTACGTATTACCTTGATTTTTTCTCCTAGGAACTATAATT  
CGGGAGGGGGTATCGTCTTGCAACAAGGGGATGTTGCGAGAAGACATACAGATGGCAGTATGGAAGCCA  
TAAAAAGGCCCAAAGACTGTTAAAAGAGGTGATCTCATGCCATTCGCAAAGAAGCAGATCTACAGCGTAC  
GTGTTGAAATGCGAAGGAAGCGTATCGGCCTGCATGCCTCAATGTCCCTATTGCAGCGCTTTCTTGCAA  
GATCC TCCCGTGACATCTAAGGGGTCTCTTTCTTGCCACATTACGTTCCCTTCTGAAGCTTCTAAAAAAA  
ATGGAGACAGCGATCTTTTTGTGTCTCTTCCGAAGATTGGGAAGCTGTACTCAATAGCCAAAATACGTT  
TGAGGAGCCTGTTCAAGAGCCTGCCCCCTCCAGTGGGACTGGCTACAATATTGGCCGACTGCAGCTCTC  
TTCTTGGGTGCGGTTTCCTTACCTTTTCGCTCATGATTC TCTTGTTTTTCGACAGACTCTGGACTCGTTC  
TCTCCTGGCCAAA GAATCGCTCATACTATGCACTAGTCGGATTC TGCTTGTATCGTGGGTACCG  
CTCTCTCCCTGAGCATTCGAAATAAC ACTCTTACGTTCCCTATTTTTTCTCTCTCTGCTACCCTTCTCCTC  
ATTGAGATTTTTATCCACCCAGATGTACAATCCGGGAAATGTATTTGTCTGAAGGACCTCTTTTTCTTTT  
CCTAGAAAGCCTTGAAGGAGAATCC TCTTCCCTCAGATAATCATCTCATATGGATCGTTGCAATCC TAA  
ACACTCATTTGAAGAGGAAATGTTATGAATGAAGCTTTCGACTGTGTAGTTATCGGAGCGGGGCCAGGGGG  
CTATGTTGCAGCAATCACTGCCCTCAAGCAGGACTCAAACCTGCGCTAATCGAAAAGCGAGAGGCTGGC  
GGAACCTGTTTTAAACCGAGGGGTGTATTCCTTCTAAAGCCCTCTTAGCAGGAGCTGAAGTCGTTACCCAAA  
TACGCCATGCTGACCAGTTTGGGATTCATGTAGAA GGATTCAGCATCAACTATCCCGCTATGGTACAAAG  
GAAGGATTC CGTAGTCCGTAGCATCCGCGATGGACTTAATGGTCTCATTCGCAGCAATAAGATCACTGTC  
TTCTCTGGAAGAGGCTCTTTGATCTCTTCAACAGAAGTAAAAATCTTAGGAGAAAACCCCTTCTGTAATCA  
AAGCGCACTCATTATCC TAGCCACCGCTCTGAACCACGAGCTTTCCCCGGGATTCCTTTTTCCGCAGA  
ATCTCCTCGGATTTTATGCTCAACAGGCGTGCTAAACCTCAAAGAAATCCCTCAAAAAATGGCCATTATT  
GGCGGTGTTGTGATCGGTTGC GAATTCGCTTCCCTATTC CATACTAGGCTCCGAAGTTTCTGTGATCG  
AAGCAAGCTCTCAAATCC TTGCTTTGAATAATCCAGATATTTCAAAAACCATGTTGATAAATTCACCCG  
ACAAGGACTCGTTTCGTACTAGAAGCCTCTGTATCAAATATTGAGGATATAGGAGATCGCGTTCGGTTA  
ACTATCAATGGGAATGTGCAAGAATACGATTACGTTCTCGTATCTATAGGACGCCGTTTGAATACAGAAA  
ATATTGGCTTGGATAAAGCTGGTGTATTTGTGATGAACGCGGAGTATCCCTACCGATGCCACAATGCG  
CACAAACGTACCTAACATTTATGCTATTGGAGATATCACAGGAAAATGGCAACTTGCCCATGTAGCTTCT  
CATCAAGGAATCATTCAGCACGGAATATAGGTGGCCATAAAGAGGAAATCGATTACTCTGTCTGCCCTT  
CTGTGATCTTTACCTTCCCTGAAGTCGTT CAGTAGGCCTCTCCCCAACAGCAGCTCAACAACAAAAAAT  
CCCGTCAAAGTAAACAAAATTC CATTTCGAGCTATTGGAAAAGCGGTGCAATGGGCGAGGCCGATGGA  
TTTGCAGCCATTATCAGCCATGAGACTACTCAGCAGATCC TAGGAGCTTATGTGATTGGTCCCTCATGCCT  
CATCACTGATTTCCGAAATTACCC TAGCAGTTGTAATGAACTGACTCTTCCCTGTATTTACGAAACTAT  
CCACGCACATCC AACCTTAGCAGAAGTTTGGGCTGAAAGTGCGTTGTTAGCTGTTGATACCCATTACAT  
ATGCCCCCTGCTAAAAAATGACCGACTCAGAATCTCCTACTCTAAAAAATCTATACCCGCCAGATTC CC  
TAAGTGGCTACGCCAGAAACTCCCTTTAGGGCGGGTATTTGCTCAAACCTGATAATACTATCAAAAAATAA  
GGGCTTCCCTACAGTCTGTGAGGAAGCCTCTTGTCCGAATCGCACCCATTGTTGGTCTAGACATACAGCTA  
CCTATCTAGCCTTAGGTGATGCCTGTACACGTGCTGCGGCTTTTGTGATATTGACTTCACTAGAAATCC  
CTTACCCCCAGATCC TGAAGAAGGAGCTAAAATTGCTGAGTCCGCAAAAGCTTTGGGACTCAAGCACATT  
GTCATCACTATGGTTCCCGTGATGATTTAGAGGATGGAGGAGCCAGCGCTCTTGTCCACATTATTGAAA  
CGTTGCACACA GAAT TACCAACAGCAACTATTGAAGTCCTAGCCTCTGATTTTGAAGGTAACATTGCTGC  
CTTACATCACTTACTGGATACGCACATTGCTATCTATAATCATAATGTAGAAAACAGTAGAACGACTCACT  
CCATTTGTCCGTCATAAAGCTACCTACCGAAGATCGCTTATGATGTTGGAGAATGCAGCCAAATACCTCC  
CTAACCTGATGACTAAATCAGGTATCATGGTAGGAT TAGGAGAGCAAGAAAGCGAGGTCAAGCAAACCTT

AAAAGATCTTGCTGATCATGGCGTTAAGATCGTAACTATAGGCCAGTATCTTCGTCCTTCACGCAGACAT  
ATTCCTGTGAAAAGCTATGTGTCTCCCGAGACTTTCGATTATTATCGCTCGGTAGGAGAGTCGTTAGGAC  
TC TTTATTTATGCTGGCCCATTCTGTTCTAGCTTTAATGC GGATTCGTTTTTGAAGCCATGCGCCA  
GCGGAAACCTCAACCTCTTCGCTACTTCCGAACAAAGATTAGCCACATAACCTGTTCAATTTGAAGCAT  
TC TCTGCAGAAAAATGTTCCCGATTGGCACTAATCTCCCATTTGCTATGGT GAGTGAAAAGGTGTGCG  
TGAGTATGTTTCGTTAT ACTCTTTCCTCGATCC TTTATTTTTATTTGGCTCTTTCTCTGCTCGGCTT  
GTGATAGTCGTTCCATGATTACACACGGCTTGTGAGGACGTGATGCTAATGAAATCGTAGTGCTTCTAGT  
CAGTAAAGGGTTCGCTGCACAGAAAGTTCCCAAGCAGCGTCTCAACAGGAGGATCTGGAGAACA ACTC  
TG GATATTTTCGGTTCCTGCCGCACAAATTACAGAGGCTCTAGCT ATTC TGAACCAAGCTGGGCTTCCAA  
GAATGAAAGGAACCAGCCTTCTTGATCT ATTC TCTAAACAAGGGCTGGTCCCTTCTGAAATGCAAGAAAA  
AATCCGCTACCAAGAAGGTCTTTCAGAACAAATGGCTACGACCATTAGAAAGATGGACGGTATCGTCGAT  
GCGAGCGTACAGATTTCTTTTTCTCTGAAGAAGATCAACGGCCGCTAACGGCCTCTGTATATATCAAAC  
ACAGAGGGTATTAGACA ACCCTAACAGTATTATGGTGTCTAAGATTAAACGTTTAGTTGC GAGT GCTGT  
CCCAGGACTATATCCCGAGAACGTTTCGTTAGTCACTGACCGAGCTTCTTATAGTGACATTACTATTAAT  
GGCCCTGGGGACTCTCCGATGAAAT GGAT TATGTTTCTGTATGGGGGATCATTC TAGCTAAGCATTC  
TTACTAAATTC CGCCTTGTTTTCTATTTCTTAATTC TCCTTCTCTTCAATTC TTTCTGTGGGCTACTCTG  
GGT CATTTGGAAAAACACACACTGATTTCTGCTCT GGGT GGAACAAAAGGATTC TTTGATCC TGCCCT  
TACTCACAGCTCTCTTTC ACTCAGAAT AAGCCAGCTCCAAAAGAAA ACTCCTGGAGCAGCAGAAGGTGCAG  
AAGCGCAAACCGCTTCGGAACA ACCCTTAAAGAAAATGCAGAAAAACAAGAAGA GAAT AACGAGGACGC  
TTAAGTGACAGC GAATACCTTTGGATTC TTAAT ATCC TGATGAAGCAGGCAAAAAGCTGATGATTTAGCT  
CAGTTTCTGCCGGAACATCTTCTACTAGATTC TCCGCATCATCA GGATATTC CTCTGCAGTCCTTATCTT  
TCAATATGCGTTGGTTAGCAACC ATTCATCC TTCCCT GGAT TAGTGTGCTATGAAA GAATTC CCTCCCGT  
TGTGCAATCGCAATTATTAGCTTGGTTACCTCTCCCTCTAACGCAAGAACT ACTC CCTCTTTTAG ATTC  
GGAGT ACCCTGCTACAAAACGCTGCTTAGACTTTGGAGCTTCTACCTACTTGACTT ACTC AGTAAGA  
AAGTACGTCCTCCAGGCATTACAGAAGAGATTTTTCTCCCGCTTCTCCTTTCAATGCTATGCTGTACTA  
TG TAGCCCTACCAAAATGGCCTTGATCAATTGTCTAGGGCTTTATACCTTAGCTCAAGAAATGCGAAAC  
GTAGTCGATCGTGTAGTCATTGATCGCGTGCAGCGTGTGCT ATCC GAAACGGAAC GGATGTTTCTAAATT  
ATTGTA AAACAC ATCC TATGAAACATCTGGAACCTACGGCCTTTT TAGCCTCTTGGGAGGAAGATCAAGC  
TTTACGTCATTTCA TCCATGTTCAAGGTTTGCCTTCTTAGCTCGCGCTCTAGCAAAGAAGATAGCTCT  
TTCTTTGGTATTTT ATTC GCAGACTTGATGTGCGAAGAGGCTATATTTTTCGAAAAGCATTGCA GAGTT  
CGATAGATAGTCCCATAAT GAGT ATTTTCGAGAGCGCTTAGAACACTGTATCAGT ATTC TTGTGCAATA  
AATCAGAGAGATCTTCTCACTGCTATTAC ACTC CCATATATACAAAAAAGAAGCACAATAGCATTG  
TAGATTTTTTCTCCGATGGCTATGTTAAAACGAGAGCGATCGA GGGT CAGGAAAACCTCGATCTCTGTG  
TAAAAA GAATGCG ATCC TTGTCTGGCT ATCC CTAGTAAATGACATGCCTCATCGCGTTGG GAAT AAAGT  
AACGAGCAAAGGAGCGAGGTTCCCTGCCTGTTGGCTTTGCCAAA GGATCC TACCTCGTCAGAA GGATGA  
AATTTTTCAGTTTAATATATAAAGACCAAGAGGTCGTCCTAATAAAAAAGTTCTCTCCCAGACGCCTA  
TACTGCGGTGTTAACTGCCAAGAAC TCTGGAGAAAACACAAGAAGATTGTGAAGCTTATACACA GAAT  
ACTC ATGAAGAAT GCGCAAAGCTAAGGGAAGAGGCTAAG GAAT CAAGGCTTCAGGAAGGAAGCAAAGCTT  
GGAGCAAACAGCTCGCCTTTCTTATTACAGAAACACAAGCGATGCGAGAACAGATTAAGCCTCCCTCGT  
GCCTTAGCGATTGCTAGCGTCAAAAAGATCATCGGCAAG GAAT TAGAACTAAACCAGAAACTGTGGTT  
TCTATCATTTCA GAGT CTTTAAAAGACCTCACGCA GAAT AAAC GGAT TGTC ATCC ACATCAATCC TCAGG  
ATCTCGCTATTGTGCAACAACATCGTCCT GAGT TAAAAAACTC GTG GAAT ATGCAGATGTGCTTTT ACT  
CTCTCCAAAGCCAGTGT ATCC CCTGGAGGTTGTATCATTGAAACAGAGACCG GAAT TGTAATGCTCAG  
CTTGATGTGCA ACTC GCTGCCCTGGAACAAGCTTCTCTGCC ATCC TAAAACATAAAAAACCTGCGGACG  
CTTCTACAACAGATCAGCCTCAAAGCAAGAAAGACTAGGTATT GGAT TTTATGCGATTGATTGTTT GAAT  
TTTCTTCTTCTCTGC ATTC TTAGCGCTCCCTATAGCTTCGCCAGTACTTGTTCGCGCAGCACAAGGCGCC  
TCTTCTTGCTTCCGTGCGGACCGCTCCTCAGCAAGAACTTCCAGCATCTCCAGAAAAAACTGAAAAGC  
CTTTTCGTTGTCCATCTTATCGACCAACGGTAGAAGCTCAACACCTGCTACCTCTCAAGAAGATCTTTC  
CTCCGGAGCCTTTTCAGAAACGT ATCC AGATTTGACTACGCAAGCCGTT ATCC TTCTATTTCTTGCCTTA  
TCTCCTTCTCTGGTTATGCTCCTGACCTCCTATTTAAAATCATTATTACACTAGTTCTTCTTAGAAATG  
CTTTGG GAGT ACAACAAACACCTCCTAGCCAAGTCTCAATGGGAT TGCTCTCATTC TATCGATCTACGT  
TATGTTCCCTACAG GAGT GGCTATGTATCACGATGCTAAAAAAGGTATC GAGT GAGT GCTGTCCCTCGA  
GATCTTTTTTCTGCAGAAGGAGCTGAAACAGTATTTGTTGCTTTGAACAAATCGAAAGAACCTCTGCGAT

CC TTCC TTAT TAAAA TACACCTAAACCTCAG ATCC AAAGCTTTTACAAAATTTACAAAAGACTTTCC  
TCCAGAACTGCGCAACAATTAACGCCTTCTGACTTCATGATCATC ATTC CTGCTTTTCATCATGGGACAG  
ATTA AAAATGCTTTTGAGATCG GAGT CTTGATTACCTCCCTTTCTTTGTCATCGATTTGGTCACGGCAA  
ACGTCCTAGTTGCTATGCAAATGATGATGCTTTCCCTCT ATCC ATCTCTCTCCCTCTTAAACTGCTCCT  
TG TAGTGATGGTAGAC GGAT GGACCTTGCTACTAGAA GGGT TGATGATTAGCTTTAAATAAGAGACTTTC  
CTATGCTGATGCTTGCAACAAGTTTCAAATCGATTTTGTGTT GAATATTC ATATGAAGCCCTCTTATTAAT  
TC TGATCATTTCAGTCCTCCTATTATTTTGGCTTCTGTGCTTG GGAT TATGGTGGCTATTTTCCAAGCA  
GCAACACAA ATTC AGGAGCAA ACTTTGCTTTTGTCTATTAAGCTCGTTGTCAATTTTCGGAACGTTAATGA  
TTACTGGAGGCTGGCTGTGTAGCATGATTTTACGGTTGCTGCGCAGATTTTCCAAAATTTTACAAATG  
GAAGTAGATTGCCATGGCTACGCTTCCCGAGGTTCTTTCAGGGCTCGGCTCTTCTATATCGATTATATA  
TTC CAAAAGCCAGCCGATTACGTTTGGACTGTCTTCTTTTGTAGCGGCACGCATATTATCTATGCTGT  
CGATC ATCC CGTTC TAGGAGCTAAACT ATTC CCGTCACCAATTA AAATG GGAT AGCGCTCTCTT GGAT  
GGGAT TGCTGCTACCTCAGGTGATACAAG ACTC TACGATCGTCCACTACCAAGACCTAGATATTTTCTAT  
ATCC TTCTTATTAAGGAGATTTTGATTGGCGT ACTC ATCGGCTTCTGTCTCTTTTCCCTTCTATGCTG  
CCCAGTCTGCA GGATCC TTTATTACCAACCAGCAAG GGAT ACAAGGAT TAGAAGGTGCTACCTCTCTCGT  
ATCTATAGAACAACTTCTCCTCACG GGAT CTTTTATCATTATTTTGTGACTATCGTTTTTCTGGCTTGCA  
GGAGGACATCGCATT ATCC TTTCTGTCTTTTTACAATCGCTTGAGATC ATCC CTCTTCATGCTGTTTTCC  
CTGAGAGCATGATGTGCTACGAGCTCCTATGT GGAT CGCGATATTA AAAATGTGCCAATTGTGCTTGAT  
TATGACCATA CAGTTGAGCGCTCCAGCAGCGGTGGCTATGCTTATGTCAGATTT ATTC CTAGGGAT CATC  
AACC GAAT GGCTCCTCAGGTACAAGTCACTACCTACTTTCTGCAC TGAAGCCTTTATGGGAT GTT AT  
TC CTAACACTGGCTTGGTGGTTCATTGTGAAACAAATGATTATTTC ACTC TGGCATGGTTCAAAGAAAT  
CCCTACTATGCTCTTCGGAGCTC ATCC TCCTAAAGTTTTGTGATACAAAAAAGAA ACTC CCTCCAAA  
AAGAGG GAGT TCTTCACACCACGTAAGTGTAGTCTTTGTTGCTATATGGCCTT ACTC ATGACGAGAAGTC  
GTGTCTTTATGCTGCCCTTGAGCAAGTAAATTAACAATAATACAAAGCACGATAAAAAGACAGAACAACG  
AAGGAGCTTTGATTAACCAAAGAGCGCA ACCC CGCATACCAAAGCATTTTTAATAGGCCGTTTTTAGC  
GTAATAGCTCTGCAGATTTTGTAGCACAGCTAATATCTCAGGAT AAA ACCC TAAGACT ATCC CGGAGGCA  
ACAAATA ACCC TCCG ACCAAGATACGCAGTTCCGTATA ATCC CAAAACAATCAAAGCACCACCGATGG  
CTTCGCAAGCATGTCGAGATAAAAACCTCTTC ATCC CCCCACCTTT GGAT TTGTGTGCAATCACGCAC  
TTTTTGTTTT TAGAGA CCAAACCTTAGAGGCCGATGGTTCTTGTGAGGAGCTCTCTTTTTTGCATCTCGTCC  
GCCATAAGCCATACTGATTTTTTCTTTTTTATCAAATTAATCTCGTACTAAACAATTATCAAAGATAAT  
TTAAATATAAACATAAAAAACCATTTAATTAGTTTTTCTTCTTGAACGCAACGACTTCTGTTA ACCC CT  
TCATTTTCT GGGT CTACCACAAAAATATA ATCC CCAGCAGTCCCTAATGTGTAATCAA AACCTCTT AT  
TC AGTAAAGAAAGAAGATCATATCGATGGAGAAT TACCTGCGTTTTGTCTTGCA ACTC TGTGCGGAAATC  
CGTCTAGTTTTTAAAAATTTCTAATGCAGCAGCTTGCCATAAGCTTTAATAGCCA ACTC CTGCTGTGCG  
GCGCTCTCCAAACCTCTTGCCGTACACGTTCTA ATTC AGAATAAGCTTTAGAAAT TATTGATAAATGCTT  
GAA GAAT AACG GGAT CTGTGAACAATAA ATTC AACCT ACCC TGATTGGTATTTTTCTCTTCATAGTTGAG  
AAAATGCAATAAAGAACGCGTTGTCTTAGTGCCTTTTAGCATCTTGTACAACCAACCGGCTTCTCTTCA  
GGGAGGACTACCGTCTCAAGACA ATCC GAACCAAGCTCTCGAGCTCGAGAAATAATCTC ATCC TTTTGGAG  
CAAGCAAAGCCTCTATAACACGAT ACTC CGCACCTTGAG GAAT GAGCTCTGACTGCACATACAGTCCCTG  
TAGCAACCTAGCAAAAATAGCATATGCTGAAGAA GGAT CTCCATA ATTC TCCGGAG ACTC TTTT CAGCAA  
GAAT AAAGATTGAACCTA GAAT TATTTGGCGGCCGAGAAAAAG GGAT TTCTAACAGTCGATAGCGCTTCT  
GCCGAACAACGACACTATCACGCTCCTTATCTTGCCTACGAGGCTCTGCTCTTTTCCGCTGGGAAGACAA  
TCGTTTCTGTTTTATCTCTGTAGATCACTTCAGAAAATAGCAGATTGTTGCGCAGAAAAAGCTACTTCTTCC  
TTTTCTTGAAGTTTTGCATAGGAA ATTC CTCTTAC GAGT TCCGGCAGC ATCC AAAGATAACCACGGTCACCA  
ACGAGGTTAAACATAGTAGTGTGAAAATAAAATGCATAGGCTCTATCT ACCC ACAGCAAAAATATAGGAA  
AGAGT TCTTGGTGGCAAGGCCCAACCTTCTTACTAGTGTAAAGTAC ACTC TATCTGGTCCCTCTCCTA  
GACCTTGATATCTAAGAACTTTCC ATTC CATAGAAAGAACATGCGTCCATAAGGAAATTTTCTCTGACG  
GGCTCCTCTCTTTC ACTC GCTACTATTAGAGAAAATTTCTT GAGT GATG GGGT CATAGTGTAAACGTCCCT  
TGCACAACACCTGCTAAGTGA GGAT CGACATA ACTC CCCGATCGAAAGAAAAACTA ACTC TTCTGAG  
CTTCCATGGCAATAGT GGAT AAAAAGGTACCTCTTAAAAATCGATACGCTTGTCTCATTGAGAAAGAT  
TC TATACACGTGCTCTTTCTCTTTATGAGAT ATCC AT ATCC TCCGTGTCCAAT ACCC TAAAGAACCAGC  
AGCAAAC TGATAAGCACGCAAGCGATGAGAAGTTCTGAAAGTAAAAATGCTCGTTTTTTTTATCTTTT  
TAAACATAAACACCTCTGTGCAGCGGCTCCCTTTTTCTGGCCAGG GAATAAGTCCACCGTAGCGTCGACC

GAACATAAAAGCCTGCCGCTGCGTTACGTTTTTCTCTTAGGAGGGATAGTGTATAGCTATAAGGGATCT  
TGATAGCTTCTCCCTGCTCGTATACACATACACCCCAACAAGCTCTCCTTCCCTTTTCAGGGAGAGAGC  
TTCTCTATCCATTTGCTGAAATATGGCGTCTCCACCGCAAAAAACAGTAATCGATGCATGCAGGAAGC  
TGTAAGCGAAAAATGTCTTCCCTCAAACGAACGAGTGATCCGTGTATAAAACACCACACTAGGAATTAACA  
CTGTGCAAAGAAGGGAGAGAGAAAAGCACCTCTACTAGTAAAAACAACGTTTTTCGTTTGAAGGCCAT  
TTCCGTCCCCTTACCCTCGCTGTTCAATTCCTTACTTTCTTAGAGAACACAACAATATCGTCAACCTTGTGTC  
ATTCATTTTAAACAAGAAGATCTTCTCCCAAGCATCTTTAAGAAGTTTCTTTCCCTTCCCTTGCACCACGCA  
GAATCTTCTAAAATCGCTTCCCTTATTTGCGATGACCTCTTTTAGAGACAAATTTCCGGAAGCATATTCACA  
TCATAAGGACGTCATACACGCGAGCGCAATTTTGCTCTGTTTGGAAAGATTTTCCCTTTTGGCAAATCC  
TCGCATATTAAGCAAGGCTCCACCAATAATACCAATGAGGGTAATGACAACCATCATTTCCACTAAC  
GTAATGGATGTTTTCTTTTTTTTTGTTTTCTTACAGTTTTCCCTCCTGTAGTTAAAACGTTTGAATACCG  
CTTGTTAACGGAAGAAAGGATGATAACATAATCAATCCAAATAAACCGCCTAGCAACACAAGAACATATGG  
GCTGACACCAGGCAGTTACCCAAAGTCAATACCCCTTGAATATCCTCGTTATAAAATTTGCGCGACATGCGC  
GAATACCACCGCAAGATCCCGGATTCCTTCTCTAGAGCAACCATCCCAATCACCAGTTTTGGCGTCCAT  
GTACGATGAGATAGCTCACGACTCAAAGATCCCTCCACGAACAACCTGCTTGGATCACTTCTTGTAGCTCTT  
CGCGCAAAAAGTCTTGTGATACGGCTCGCATCCTAATGTAGAGCTTCGATCAAATTCGCCCTCCTTG  
CAAAACAGCAGATGTGACGGAACAAAATCGACAAAATCCTATTTTAATCACCAGACTACGCAAAAATAGGG  
ATCTTCTTGATAAATTGCTCTAGAGTCTTTTTCCCTATCCGTTTTTTCCAGACTATGCGTAGGGATATCG  
CTCCACCTATTCCTCCAGCAAAAACAAGAACTTGTACCTACAAAACCATGTACTGCACGAGAAAACAGC  
TTTTGTGAGCCTTGTATCTCCATATCTTCAAAAAGTTTCTTTCAATGTAGGAATGACCCCTATTAGAAAG  
AACACCACAACAGCACAAGAAAATACCAATAAGATCGCTGGATAACTCAATGCTGCAGCAAGACTTTTGG  
ATAGTTTTTCTTCTCTTCCAACACTTTAATAATATTCATTAAAGCGCCTTCTAGATTCCCAATACTCTC  
TCCAGAACGCACACTATTCCTGATAAAAAGAATCAAAAATATGCGGGAACCTCGCTAGAGCTTCTGAAAAG  
ACCCACCAGCAAGCTAGAGCTTCCATCAAAGAAGTGAGAACCCAGCCAGCGCATGTCCCTGATACTGAT  
CTCGCAATGAAGTCAAAGCATCGTATAAGGAGATCCCGCATCGTAATAATAACGTAATTGCTTAGTAAA  
AATAACCAGCTCTGTAGTTGTGACACGGTAGTTTCTCTCTCGCACCTTTCGAATGTCCAGAATGCGAGCT  
CCTTGAGCAGCAAGAAGCTCTCTTGCCTCTCGCTGATGGAAAGCCTCTACAAAAGAAGCTCGTTTTTTCT  
CGGACTGATCAAGATATGTGCAAAGAAACCTAGCCATATCCCTCCTGCTATTCGACCGTTTTGCCACA  
CGCAAACTTCGAAAAGGGTGTCTCCCGCAAGAGCCAGTTCTACTCATGCTCTAGCAGAGGGCAAT  
ACCCCTTCTCGCTCCGCAACACCTCGTAAAATGTGGTAAGGTCTCCCTAAAGCAATTTCAGAACGGAGTGT  
TGTGGTTACATCGACAACTCATAGATCCCTTGTCTTCTTTGTATCCGGAACGGAAGCACTGTGAACAT  
CCACGTCCTTTACATAAAGGAGCGAAAGGATCCCTCCCTAGAGCTCTTAATAAAGCCTGTTCTTGCACAT  
CGCCACACAGAATTCCTTGTCAATGCGTACAAATTCCTACGGACGAGTCGTTGAGCGACAGCCCTATCAT  
TGTGCGGATAAATAAATAAGGCTCTACTCCATGCTTAAAAGACGCGGGATGTCAGAAACAGCATCATTC  
GTATGAAGAGTAGACACTACCAAGTGCCCCGTCATGCCGCTTGAATAGCAATCTCCGCAGTCTCTTGAT  
CCGGATTTCTCCTACCATCAAAACGTCCTGGATCTTGTCTTAAACAAATGGCGAAGTCCTTTAGAAAAGGT  
TAGTCTATTTTAGGTTTACAGCAATTTGAGCGACACCAGGGAGTTTATACTCTGGAGGATCTTCTATG  
GTCATGATATTAGTAAAAGGACCTGAAAGGTGTTGTATGACACTATATAAAGTGGTCGTCTTCCACTTC  
CTGTCCGACCTGTTACTAATAGAATCCCTTCCGGAATCCCTATCGTTTTCTAAAGGAGGTCTCCATTTT  
AGGAGGCATACACAAGCCGCTATATCTAAAATTACATTTGCGCTTATCCAGTATGCGCAACACCACCCGC  
TCTCCATGAATGACAGGGACCGTACTGACACGCATATCGATCTTGTCTCCTAGTTGCAACTTAATGC  
GACCATCTTGAGGCAGTCGGTGTTCGGCGATATCGAGTTGGTAAGCACTTTAATACGAGTAATAAGAGC  
GGCTCGTAAATGGTTCGGGGAGCGTGGCGATCGTGTAGAACCCTGCTATGCGGTAACGAATACGTA  
AGATCTTCCACAGGGTCAAAATGAATATCCGAGGCTCGCTCTTCAATAGCTTCCCTTAAAGATCAGATTGA  
GTAAACGCACTACAGGAGCACTGTCTCTTGAATTCCTAAGAAGTCTGTGGTATCACTTTCCGATTCAGG  
CACTACAGCTTCCCTGCATAGACTGTAGCATCTCGGAAGCTTTCCCGTCTTATCGCTATATAGCTTTTGC  
AATCCATGAATAATTTCTGCTTCTTCCCTAGAAAACCAATGAAAGAGGTTTTTGGTGTATCAACCGCACCT  
CATCCAAAGCCTCTAAAGGAGTTTTTTTTCAAATGCCTTGCAAAAACGATCTTGTGCGCTAAATCCCTTAC  
AGGACAGCAATAATTTTTCTTTAAAAAGAGTAGGGAAGCCGATCTAACAGATCTTGCATAGTGCCTTTA  
TTCCTCGTCCATCATACTCACCCCTTCCCTCGAGAGCCGGAAGGATTCCTTCTCCCATACGGTAGACTCTTT  
CTTTCTATAGCCTGTTTAGCAGCTGCTGTCTGCTACTAAAGCTCTGAGGAAATCATCGTTCTCCCGG  
GGCGAGCAGCCAGGAAAGCACATTCCTAATTTTTCTTCTGTCTCACTAGGATATCCAAAATCTTCGGAGT  
GATAAACATAAACATCTCTGTTTGTGAGTCCGAAGCAGAATCCATACCAATAATTTTCCCTATTCCTGGC

AACTC TCCTAAAAATG GAATCC CGTCACGAGAATCC ATAGTTTGATTACAACGAAGCCCCCAATAATGA  
CCGTTTCGCCATCTT GAATCC GAACCTTGTTGTAATATTTCTGCGTGTAACATCGGGACG ATCC GCATG  
ATTTCTCCAGTC GAATCAAACGTGATGTCGGTCTCTAAAGTAATAAAGCTCTTCCC ATCC TCTTCTCCG  
ATATTAATAACGGGAA GAATCTTAATCATAATCC CGTATTGAGCTCGATTGTATTGGGCTTT ATCC TTAT  
CAGAAGAACTACAATTGACATTTCTTCCACAATCGCA ATCC TCGCCG GGGT TTGGTTCATAGTCACGAC  
GGAAGGACTTGCAATTAATACGGAC ATCC TCTTGGCCATGAGAACTGATAAGCAAAGTCATAACTAGGA  
ACA ATCC CTTTTGCTCCACCTTTGAACAGGA ACTC CAGAATGCCCCACTTGCCACGAAACGGCTTGCG  
TTCCCTGCTTACAAACCTTCTTCTCTAAACGCAATAGGTTCA ATCC AGATTTACGTTGATT GGAT AGTTT  
TCTTTCAAAAGCAGAACCTCTATACGCACCATTTTTTTGGGCAC ATCC AGTTTCTTCAACAACATCTTG  
ATCTT GGGTAAAGCTTCTTTCTCAATAACCATAATCAAGGTTCCGGTCTTG GAAT CTGCAATAAAA ACTCC  
CATATTTTCGAGAACCTTCTTTTACGGAGCTCTCAGCGACGTATCTATATGT ACCC CTA ATCCATTCGA  
AGA GGATCC CGCTTTACTTGAGACTACGCCAGTATCACA ACTACTAGATGCCCCAGAAGCACCATTGAG  
AAAATATCATGTACTTGAGAAAGAAGCGCTGCAAGCTCCTGA GGAT CTGAGT GTTTGACATGATACCAA  
ATACCGTTTTATCGGTAGGGCTCTCT ATCC CCTCTTCTAGTTCCC GAATAAGATCTATTGCCCTCTGAAC  
GATGGGAAGAGCTCCACTTAAGAAAAGCGAGCGTCCATGGTTTTGTAAAGGGACCAC TTTTA ATCC ACT  
CCAGAA GAATCTTCTCCCTCTTTAGCTAAATCTTCTCGAAAGCTGCTTTCAAAAATAGCCAGCATTTCTG  
AGGGT TCTATTTTTGATAAAGAAAACAATGCGATGCTCTTGTC GAAT GTTGTCTGATTGTAA GAATTCATA  
GATTTTAAG GAGT TCGGTAATCTCGCTGACAGCTCCAATAACCAAAC TTTCCCCCTATAAAAATCAATT  
AACATGGTATCGCTATTTGCGAACTTGCGCAAAGCTTG TAC ATCC GCTCGTGCATCTAAATTTTTAGAAG  
AAAGTACAAAAGCAATATGTGCCGTCATAGGCAAGCTATCTAGCTCTTG TCTAG ATCC AAAGATACCTAA  
AACACCAG ACTC TTCCCTATTAGTTAAATACAGCTCCTTA ATCC AAGGACTAACCTGTCTG ATCC CAATA  
CCC AGCCGATTAAAAGCAAAGACAAAC ATTC CTCAA ATCC TTCTTTAGGGACC ACTAGCTTAGACATGG  
CTGTGATACGCATCGCCCCAACATTTTGAGGAAT CACATAGATA ACTC TGTTTCATCTCCGTAATCACTGAC  
CAGATTATAAATCGTAGTTTTCT GGAT GATTC CAAAGGGCATAGTCTTCG GGATCC CCCCCCTTCTGCA  
ACCTCTACTGACCATAAATCTTCCAATGAACGT ATCC GTTGTTTAGCGCCGATCAATCGGCTTCGCA ACT  
CGTCCCATACCGCCTGCGAAGTCTCTCCTCGAGAACGGAGAGACAAAGCTTCTTCGTATAAAGATTTGAG  
AACATCATTTGCCCTCTTTCA ATTC AGCATTAAAAGATGAAATATGCGAAAAGGGGCTAGCG ATTC CGTT  
TTTTCTTCTAGAGAAGCCAATTTTTCTGTAATCGTGATGGAAAAC TAGGAACCGTCAAAC TTTCCAAAC  
AAAAAGTCCCTAGAAA ACCCATAGCCCAAATATTTTTACCTAAG ATCC TCCCCCTATACGAGAAT TTTT  
CGTCCCGCTCTCCTGACCTAAATG ACTC TGTGCAACAGTCTCTAGAACCTGCTTAAGCGGTAAAGAGATC  
GTCTCAACAACGTGCGCT GAGT ATTAATAACATGCTCTTTGAAAACAA ATTC CCCGCTTCCCTTATCAA  
TTC TTTCAAAAAC TAAAAGAGGGCTCCGAAGCTTACCTGATAGGTAATCTTCTAATTTGTCTTTTGAAGT  
T ACCC TCTCCCAGCGCTCCCCTGTAT GGAT GACCC AATCATCTGCAGAAAGAACCAAACGATCTTTCCCT  
GCTGTAATAATAGGGCGAGACCATGTTTCGCAT ACCC ACAACGAAA ACTC CTTACCA ACTC TCGGATTT  
CAATAGGAGAAGAACTTGTTTCACCAGCGTGATCTGCTGGCTCATCA ACCC ATCGATGCTCCACAGCTC  
AATCACCATCATCC GATC ATCC AAACGCTTGACTTCGAGAAGAGGG ACTC TAGTACCATCTCCTTGAAA  
GTCTTATAAGGA ACCC ATCGATCC TG ATCC CATAAAAGCACATCTCCAACAGCCAAATATTGGCTATACG  
CTTCCCAGATAAAG ACTC GAAATCT ACTC GTTCTTTGGCAGCCTGTATGACATAATCTGCCCTCCATG  
CATAAGAAGAACTT ATCC CCTCCCACACAGC GGAT ACGCTGCTTTACAGCGATACTAGGCTCC ACTC GC  
ATTC CCCC AATTTCCCATGTCTGCGAACATCTAGGTGCCAT GGAT AAAGAAAAATGCGCGCGCTCCTTAG  
GAGAAGAGACAGCCCC TCTAAAGCGC TTTCATAACGAACAACAAC ATCC AAAGAACGCCCGTCCGAAGA  
AGGCCGAC ACTC CAACCATAGAG GGGT AGGCTCAGCACTAAAAAC GAGT GTTTCTTCGTCCGGCCCTTGT  
CGAAGAAAACCTTTTCCCCTAAAGAACTTCTT GAAT CGCATTAGTGGTCGCAAGCTCTAAAAAAATTT  
TACCATTTCGCGC ATCC GGACGCTTATTACAGCCAAGGAACACAAACTG ATTC CGTAA ATCC GG GAGTTC  
TTCTCGATAGAAAAGTCTTGTAGCGCCCAAGCCCC TGAACACGCAGGCTGCTTCTCCTCTGCTGTAAGA  
GGAGAGCAT ACCC CGGCGATCGCGCTATCAAGGCGGCGCCTCTT ATCC ATTGATAAAAAAAGAAATGAA  
GTTGGCGCATAACAACAGAGAAAACAAAAA GAAT TGTATAAAGTA ACTGATTTGAGAAAAAAATCAATT  
TTTACAAAAGAAAATAAGAAAAGCCGTTTTTTTTGT TAAAAAACAAAAAATCGGCTTTTATATGAAATT  
AAATGATAATTATCTCGGAAGAGACCTTTCGGTTTTGT TAAATTTAAATTTTC ATTC ACACCTATCAGGAT  
CGTATCTTCAA ATCC GGATCC CACCTACACCAGGGAAATATA ACCC CCGGCTCTACAGTCACAGCCAT ATTC  
AATTGTAGCGTGGC ATCC GAAAAAGGCGATAACCTA GGGTATTC ATGGACCTCTCTTCCCACGCCATGCC  
CTAGCCCAT GAAT GAACGCTTTCTCC ATTC CATGTGCACGTA AAAATACGCACAGCTTCTTATGAAC ATC  
CCGACAAGGCACTC CTGCCCGACAGA ACTC TATGGCTGCACGCTGAGCCTCAGCAACCGCAACGT ATCCA



TCC AATAGCTGCTGTTCTGGAGCCGCTCCAAATGCCACCGTTC GAGT CATATCTGAACAATATCC TTCAT  
AGCAAACGCCAATGTCGATCAACACCAC ATCC CCCTTTTTTCAAAGATCG ATTC GTTG GAAT TGCATGGGG  
GAAAGCCGC ATTC TCACCAAATGCAATAATGGGAGGAAAAGAGACCTTTTCTATAACCAAGGTTAGCCCAA  
AAGACGTGAAGC ATCC GAACCAGTCTTTTTTCTGTA ATCC CTGGGCGTAATGCAGCCAGAACAAAATCAT  
ATCC TGCAGAACCTATTTCCGCAGCTC GAGT CATTTTTT GGAT TTCTTCCGTGCTTTTCACACAACGTAA  
CTTCTCCGCAACTAACTTTGCGGAGAAAATGCAT ACCCGCTGTTC ATTC GTTTTTGTGCTATCC CGTAA  
GGAGT AT ACTC GCTGTCAAAGCCTATCGTTTTTA ACCCTGTATTTTCGATATAACTGCC GAGT TCCTGAT  
CCACACTTTTGAAT AAGAAACAAGCACCACGTCT GGAT ACGAGCATAGAGATCTTTATCTAATGGAGA  
CACAAACAATACTGCTTCATCAC GAGT GATCAATAAA ACTC CTGATCGAGCCTGATCTTGAAAAAGTAG  
CTAAT ATCC TCGTCTTTCTCTATCAAAAAAGCATCAAGTGC GCGCTCCACTAGA GAAT CTTGCAGTCGTT  
TGATC GGAT TTTG ATTC AT ATCC TATCTCCTACATAAAATCGTC ATCC AAAACTAACCGACGTATCATCT  
CTCCGTCAAACGCTTTTTTCAGGCTTGCCAAGCTTCCACAAAATATCAAGCCAAGCATAATC GAAT GCTCT  
TGCATTTCTAGAGAAAACCAACTTTTGAACAGTATTTTCAAC GAGT TGTTCAAAAAG ACTC CCCTACATGC  
AGAGCTCCTTCTTGAGCTAGCGCAACA ATCC ATTC TTTTCAGTTCTTCTTCTT GAAT AAAAGGCGGCGCAC  
TTTTCTATTGCAAACTGTCTGGGCTAATACGCGATA ATTC GATTC CTAAAGCAGTCAAAGCTTCCAAACG  
CATCTGTAAAAAGTCTGCTTCCAACCTTAGTCATCTGTACAGATGGAGGAAGTAAAAACGTTTGACAGGCT  
AACCTCG ACTC TAAACGCTCGGAT AATAAAGAAAACATAAAAACAAATGTTTACGCGCAGCCTGTACAAATA  
CAACATGG ACCC CTTCA GAAT CTTTCGACTAAAAGAAC TTTACCTAG GGAT GTAAGAAAGCGTACTTTCTC  
AACAACGAAAGAGA ACTC GAGGCA GAGT CTCTAGACACAATCGTAGCCATCTCTGTTTTTCAAATA GGGT  
TGCTGCGAGAAAGTAGGACAAGAAAGCGGGGCGAGACAAATCGCAGGAC GAAT AGATGGAACGCTGATCC  
CCTCATTTTTCTATAG GGAT TTTTTCTGTAGGGACTTTCAACACAATCTCTTCCAAAGAG GGAT GATCGACG  
CAACAACGCCTCTGAAATTGCTCAACAAGCAAATTACTAATCTGCCCTTCTGTAGTAACCGCACCTCT  
GTTTTTTGA GGAT GCACATTGAAGTCGCACCACATAGGCGGCAA GAAT AACTTCAATACAAATATA GGGT  
AGCGTTGTGCTG GGAT CATCC AAGCATAAGCTTCCGCTACCTTTTTAGATATGAAAGACGACTC TACAGC  
ACGATTATTAATAAAAAGCCGCTGTCCCTGCCTAGTAGAACGATGCTGGTTAGGAGAGCCTAAAAATCCCT  
AGC ACCC GAAG ATCC CTTGCTGCTTATCAATAAA GAAT GCTTCTTGAACAAAAG ACTC TCCCAAGACTA  
GCGCTACACGCTCTATGAAGCCTTGTCTTAGCCACATGGAGT TCTTGACGACGCTCACTAATCC ACGT  
CC ACCC AATGCCTTCTGAAGAAAGAACACTATTTTCCAACAACGAC GAAT GGCCAACCG ATCC ATCTGC  
GGAGATTTTTTGAAAGATTGTGCGCATGGGAACATTGTAAAAAAGG GAGT GGACCGCAATAGTCGTTCCCT  
GCTGCTAGGAGCAGGCTCGCAGCAAACAGGCTCGCCTTTTTCAATCAACGCTT TAG ACCC CAATCC TCC  
TGCACGAGCCGTAT GGAT CTCCATTTTGGAAATCGAGGCTATCGAGGGCAGAGCTTCTCCCTAAACCCA  
TAACTAGCGAGAGAAAAGATATCAGCAAATGAGCGATCTTTGAAGTGGCATGACGTTGAAGCGCCACCG  
GCACCTCTTCT GGATCCATCC CCACTC CATTGTCTCGCACAACAATCTGGCCTCT ACCCCACCTAGAGT  
TTCGATAT GAAT TTC ATCC GCGCCTGCATCTAAT GAATTC TCAATCAGCTCCTTAACTACAGAAGCTGCA  
TTTTCTATGACCTCACCAGCAGAGATCTGGTTAACC GTTACACTATCTAATAAAC GAATCC GAGAAGGCG  
ATAACGACACAAAGCATCTCCGCTATGATTTAAGACTTTACT ATTC AGCGAGAGACAGCAGGAGAGAAA  
GCGTGAAGTCCAAGCCTTTCGCGCAGGAGGTAACGGAAAAATTGCAAGGCAACGACACACGCTGCTGCAC  
GATGTTAACTTACGCAAAA GAAT TAGTTATGTTTTATTAAAAAGCAAATATTA AAAACGTTTTTTATTAA  
TCAACTTGTTAAATCAGATCGTTA GAAT TTAATATTGTTAGTAGTAATTTGTTATTTTATTTTTTAGGA  
AT TATCGCGATGAGC ACTC CATCTCTAATA ATTC TAAAAACCTTCGGCCTCTTTTAATAAAAAATCAC  
GTAGCCGCTTGGCCGAGATTGCTGCACAAAAAAAAGCAAAGCTGA GGAT TTGGAACAAAAT ATCC TGT  
TCCTACGGAAGAGGAGACAAAACAAGTTCTCATGGAC ATCC TACAG GGGT TAAGCAAC GGATTA ACTC TT  
CAGCAAATTTTAGGTCTCTCCGACGTCTCCTTGAAGAGATCTACACCGTAGCATATACCTTCT ACTCC  
AAGGGAAATATCGGGAAGCTATCGGTCTTTTCCAAATCTTAACAGCCTCCAAACCTCAATGCTACAAATA  
CATCTTAGGTCTTAGCTCTTGCTATCACCAGCTAAAAATGTATGATGAAGCCGCTTTTGGTTCTTCCTA  
GCTTTCGATGCTCA ACCC GAAA ACCC ATCC CTCTTACTACATCGCCGATAGCTTGATGAAGCTAAACC  
A ACCC GAA GAAT CTCAAGACTTCTCGATATTACGATCGATATGTGTAAGAACAAGCCG GAAT ATAAAGT  
TCTTAAAGATCGCTGCAGCATTATGAAGCAATCTTTAGATGCCGTGCTGAAAAAAGAGAAATCTGCAAAA  
GGCTCTGAAACACAAGCCTCCTCTCTTAAAAACACAAAAGCTAAAAAAGCTGCTTCTAACAAGAAAAAAG  
CAAAGTAAAAGCAGGGACTAAACCAT GAGT AAAAAACATAAGCACAAGCAAGCACACACTTCTTCCAAAC  
CC AAAGTAGAACCTGCGTATGTTTTGAAAAA GAAT CTCCTGCTTTGCAAGAAT TGCAAAATGCGATGAT  
TTCTTTTTCTCAAGACTTGCTTTAGCGCAGATGTTCTCAGAAATACAAGATGAGAAACAATTAGCCAAA  
ATGATGGCAGC ACTC AGCG GAAT GTTAG ACTC TCTTCTGTGCAAAACCTTGACAAAAG GGGT GTTTGACA

ATCC TAAAGAGGAAGCCCAGTTATCTCAAGAAATTTCTAGTATATTC CTGGCTTAAAACACCTTACGGA  
AACCGTAAATAAACATATTGCTGATGAGAAATAATCGTCTCGTCTTACAAA GAGT TTTT TAGAGAGGTTAT  
ATGTCCCTTTCATCTTCTTCGTCTCCGATAGTAGCAACCTTAA GAAT GTCTTGTCGCAAGTCATAGCTT  
CGACTCCTCAAGGCGTTCCTAATGCAGATAAATTAACCGACAATCAGGTTAAGCAAGTTCAACAGACGAG  
ACAAAATCGCGATGACCTAAGCATGGAGAGCGATGTCGCTGTTGCCGGAAGTCTGGAAAAGATCGCGCA  
GCTTCTGCTTCTCAAATAGAAGGACAAGAAGTTATAGAGCAGCAA GGAT TAGCTGCAGGGAAAAGAACTG  
CATCTGCCGATGCGAC ATCCCTA ACCCAAAGCGCATCTAAAGGAGCTAGCTCGCAACAATGCATAGAAGA  
TACTAGCAAATCTTTAGAGCTATCTTCTTTAAGTTCGTTGTCATCTGTAGATGCCACGCATCTACAAGAA  
ATTC AAAGCATCGT ATCC TCTGCTAT GGGT GCTACTAACGAGCTTTCCTTGACGAACTTAGAAA ACTC CAG  
GCCT ACCCAAACCTTCAACGACACCTCGTCAAGAAGTAATGGAAATTAGCCTTGCAATTAGCAAAAAGCAAT  
TACCGTCTTTGGA GAGT CAACGCAAGCAGCATTGGAGAAGTTCCAAAGTACGCAGTCGCAATCTGCGAAC  
ATGAACAAAATGTCTCTA GAAT CTCAAGGCCTTAAAATTGATAAAGAGCGTGAA GAGT TCAAAAAAATGC  
AAGAG ATCC AAGCAAAAAGTCTGGAACCA ACTC TACCAT GGAT ACCGTTAACAAAAGTGATGATTG GGGT TAC  
CGTGGCTATTACTGTGATCTCTGTAGT ATCC GCATT ATTC ACTTGCGGTCTTGGCTTGATCGGAACTGCT  
GCTGCAGGAGCCACAGCAGCCACGGCTGGAGCTACAGCAGCAGCAACGACAGCAACTTCTGTAAC TACAA  
CAGTCGCTACACAAGTGACTATGCAAGCAGTCGTGCAAGTGGTTAAACAAGCTATT ATTC AAGCTGTTAA  
ACGGGCTATCGTCCAAGCTATTAACAAG GGGT TAAACAAG GGGT CAAACAAGCCATTAAGCAAGCTGTT  
AAGGCGTCTGTGAAA ACCC TTGCTAAAAACGT GGGT AAAATTTTCAGCGCAGGGAAAAATGCTGTTAGCA  
AATCGTTCCCTAA ACTC TCCAAAGTTATCAACACTTTGGGAAGTAAAT GGGT AACCTTAGGAGT AGGAGC  
TCTTACAGCAGTTCCCTCA ACTC GT ATCC GGGAT TACTAGTCTGCAGCTGTCAGACATGCAGAAAAGACTG  
GCCCAA ATTC AAAAAAGAGTCGGAGCTCTCACAGCTCAATCTGAAATGATGAAAGCTTTCACATTGTTCT  
GGCAACAAGCAAGTAAATTTGCAGCTAAACAACAGAAAGCCCTAGTGAAACGCAACAGCAGGCGGCCAA  
AACCGGAGCTCAGATAGCGAAAGCTTTGTCCGCAATAAGTGGCGCTTAGCCGCCGAGCTTAACTATTA  
ATTTTTTGATGGAGATCGTGTGTTATGACAACAG GAGT ACGTGGAGATAATGCTCCAG ATCC CTCATTGT  
TAGCTCAGCTC ACCCAAATGCTA ACTC AGC ATCC GCAGCTTCAACAGGAAAAACGGTCAGGTAGCCGG  
CGCTAAACAAGAAAACGTTGACGCCAGTTTTGAAGACTTACTGCAAGACGCTCAAGGAACTGGGGGAAGT  
AAAAAGGCTACTGCCAATCAAACATCAAAAAGTAGAAA GAGT GAAAAAGCACAGGCAAGTAGCGGAACAT  
CAACCACAAC ATCC GTAGCTCAGGCTAGCCAAACAGCAACTGCACAAGCCGTTACGGTGCACGCG ATTC  
TGGAT TTAATAGCGAT GGATCC GCC ACCC TTCCTTCCCCTACCGAACAGAAGTCAATG GGGT TGTTCCTA  
CGGAAAAG GAAT GGGAACTTTAGCGCTCATGGGACTGATTATG ACCC ACTC GCGCAAGCAAGTGCTAAAT  
CC TGGTCTTCGTCTTCCAACAACAAAACCAAGCT ATCC AGAACCAGGTAGCTATGGCTCCAGAGATCGG  
AAATGCT ATTC GGACACAAGCAGGCCACCAAGCCAAAGCTACG GAAT TACAAGCTCAGCAGAGT TTGATT  
TCAG GGAT TACGAACATAGTAG GATTC GCGGTCTCTGTAGGAGGAG GGAT TTT ATCC GCCTCGAA GAGTT  
TGGGAG GGGT TAAAATCTGCAGCCTTCACTAATGAAACTGCAAGCGCGGCAACCTCTGCGACCAGTTCCTT  
AGCAAAAACAGCCACTAGCGCACT GGAT GATGTAGCTGGTACAGCTACTGCAGTTGGAGCTAAAGCCACT  
TCTGGAGCAGCTTCTGCAGCTTC ATCC GCAGCTACAAAACCTACGCAAAACATGGCAGAAAGCGCCTCGA  
AA ACCC TCTCTCAAACAGCTAGTAA GAGT GCAGGAGGAT TATTC GGTCAGGCATTGAAC ACTC CTAGCTG  
GTCTGAAAAGTGTCTCGTGAAT GAACGTTGTGAAAACGCAAGGAACACGCGCAACTAAATTTGCAGGG  
CGAGCCTTGTCTTCTGCTATGAACATCTCACAATGGTGCACGGTCTCACGGCTG GGAT CGAT GGAT CG  
TCGGAG GGGT GATCGGAGCGCAGGTAGCCCAAGAACAAGAAAT GGCTGGTATGGCAGAGGCTCGCGCAGA  
GGAGCTCAAATCTCTTA ACTC AGTTC AAGCCAGTATGCTTCGCAAGCCCAACA ACTC CAAGAGCAATCT  
CAACA GAGT TTTA ATTC CGCACTGCAAACTTTACAAAGCATCTCGG ACTC TGCTCTGCAAACGACAGCCT  
CTATGTTTAACTAATCGACTTTCTTTCTCGCTCTTATTTGCA ACTC AGCTT CAGAACC GTAGGC ATCC TA  
AAAGGGCCCTACGGTTTTTCTTT ACTC TGAAGTCAGCACAT ATCC TTGGCGAA ATTC CTCATGGTAAATA  
AGCCGACA ACCCAAACACATAAAAACCTACAGCAAAACAATAGCCAGGAGGGAAACTTTCTCCAAGAAGCA  
ACCAACCAAAAAAGCTAGCAAATAGAGGCATCACTAAATTTGCAGAAGGACAGGAAGGTTGAAGAAAAAGA  
ACGCAATAACTTAGCAAACAAGTTATAGCAAATCAA ATTC GAAAAAATCACC AAAAGCACCTATCGCCTGT  
AGAAA TAGTAAA GGGT TTTCCACAGGCACAGGGT TCCAAACTTCGGTGACAGCA GAAT GTATTAACGACA  
AC ACCC CTGCGATGACCATAGCATA CGCATTAAATCGCGGT CAT GGAT AGCG ACTC ACATCTTCGCCCTAA  
TTTTCTGAGCAAAGTCCAACCATAAGAAGAAAGACAGGTAGCTGCTATCAATAA GAGT TCCGGTA ATCC T  
AACTGCC ATCC CC ACTC AGCTACATCTTCGCTACCTCCAACAGCAGGTACACAAGGTA ACTGACTA ACC  
CTAAACTTA ATCC CCAAGCTTTTTTCCAAGTAACAACCTCTCTAAGCTGGACGTAAGAACAAAAAGCGGC  
TGTGAAAGGTGAAA ATCC ATAAATAAAGCAAGCTGTTGA GGAT GAAAGCCTCTGCA ATCC AATAA ATTC

AATACATTAGTTAAATAGAAACCGATAACGGAGAGCAATACTATAGGCATGATAGCTGGACGCGGCAGAC  
GAAGAGACTCGCGTTTACATAATAGCAGCCCAAAAAGAACTACTCGGCCAATACCATTCTGACTCCCTGT  
CACAAATAAAGGAGCTGCAGCTTCCATTGCCGACTTGCCTAAAGCAAACGAAGAGGACCAGATGAAAGCA  
TTCAGGAAAATTAAGAAAATAGCCATGTCACAACA GGGTTTAAACACACAGGTTTCGTAGAGTACAAGCGA  
ATAACAACGCCTTGACCGCCACCATGAACCGTGTGCACGGATCTACGATCCGTTCTATAGAACAACCAA  
GCTTGTGCTAGCTGTGCACTAAAAAATAAGGATCTATTGTAGGGCATCTCTTGAAAAAAACCCAGGTT  
GAAAAAAGTTTTGTTATGGATCTCTATAACAATCTCCTAAAAGAAGCTCCTCCGAACTCAGATTCCTATTT  
TATCCTTTATAAAAACCCTTTTGCTTAGTTCGGTGAACGCTACAATGGCAAACACTCCGCGTAAAAAGAG  
ACGATTCCTTTCAGCGGTTTTGCAGTAAATTTTTTATTTATGGAGAAGGAATGATCCATGTAACCTTGCAT  
CAAGAAGCTTTCGAACTACCAGAAGGCGCCTCGGCGATGGATCTTGCAAATAAGATGAAACAATCTCATT  
GCTTTGTAGGGGCCCTTATTAATGATCAAGAAAAGGATCTTTCCACCACCTTACAAGACGGTGATACCGT  
TCTATTCCTCACTTGGATGATCC TAAAGGTAGAGAAATCTTTTTACACACTTCAGCACATATTC TAGCT  
CAAGCCGTTCTACGCTTATGGCCTTCGGCACAGCCAACGATTGGTCCAGTCATCGATCAAGGGTCTACT  
ATGATTTTGCCAATCTTTCCATCAGCGAAGAAGATTTCCCGGCTATAGAAGCTATGGCCAAAACGATCGC  
AGAAGAAAAATTCCTATCTCGCGTCAGGTTTTCCAGACAAAAGAAGCTGCTCTTGCCATTTTTTCTCAA  
AATCCCTTTAAAGCAGAGCTCATTGCTGAGCTTCTGAAGAAGTAGAAATTTCCGCGTATACGCAAGGAG  
AATTCCTGGATTTATGTCGAGGCCCGCACCTTCTTCGACAGCTCCTGTTAAAGCTTTCAAGCTATTACG  
CACATCTTCTGCTTATTGAAAGGTGACCCCTTCTAGAGAATCGCTGATTCGAATATATGGAGTCTTTTC  
CCTACGACCAAGGAACTGAAAGAACATCTTCATCAGCTAGAAGAAGCAAAAAACGCGACCATCGAGTTC  
TTGGAACAAAGTTAGATCTGTTCTCTCAACAAACTTGTCTGCTGGAATGCCTTTTTTCCATCCTCGGGG  
TATGGTTGTTTTGGAACGCTTTAGTTGACTACTGGAACGCCTTCATCAGCGTGCTGGCTATCAGCAAATC  
CAAACCTCCCACTCATGAATAGAGAGTTATGGGAGATCTCTGGCCATTGGGAAAATTACAAAGAAAACA  
TGTATACCCCTACCGTAGATGAAGAAGATTATGCAATTAACCCATGAATGTCTGGCTGCATGCTGTA  
CTATAAAAACCCAGCTACACAGCTACCGAGAATTCCTTACGGATTCGAGAAATCGGCCACGTACATAGA  
CACGAGCTTTCTGGAGCTCTATCAGGCTTGATGCGAGTGCCTACTTTCCATCAAGATGACGCACACGTAT  
TTTTAACACCTGAGCAAGTTGAAGAGGAAACACTCAATATCC TAAACCTTGTTCCGAACTCTATGGAAC  
TTTTGGACTCGAGTATCACTTAGAACTTTTCCACTCGTCTGAACAAGGAACCATTTGGAAGCGATGATCTT  
TGGGAACCTTGAACAGAGGCTTTGAAAAGAGCTCTCGTTAAATCGAAAAACCTTTTATCATAAGCCCAG  
GAGAAGGAGCCTTTTACGGTCCAAAAATCGATATCCATGTAAGAGATGCGATCAACAGGACTTGGCAATG  
TGAACGATTCAGTTAGATATGTTCTGCGGAACGATTCGACCTGAAGTACACAAATGCACAAGGAGAG  
AAAAGTACACCTATTATGCTCCATAGAGCTTTGTTGGATCTATTGAGCGATTC TTAGGCATTTTAATCG  
AACATTTCAAAGGACGTTCCCTTTGTGGCTAAGTCCAGAGCATGTTTCGATTATTACCGTCGCAGATCG  
CCACGAGGCTCGTGCCCAAGAAT TGGCAAACATTTTCAGCCAAATGGGAATCATTTGTCTCTGATTC  
TCTAATGAGTCTGTGAGTAAAGAAAATTCGCAATGCGCAAACATGCAAGTGAAT TACATGATCACCATTG  
GAGATAAGGAATTAGAGACCCACTTACTAGCAGTGCGCACACGAGACAATCGTGTGTTGAACGATATCGC  
TGTCGAACAGTTCTCTCATGTTATTC TTGAAGAGCTTCGCTCTTTATCCCTTGACTCCTTCTTATAGAAG  
GCCGGGCTTGATAGATTC TGCCATGCAAGCCATTATTTCTTTTCACACATCCTCGCCAATCTCCTTA  
CAAACGATCATGGATTTCAAATAGCCGAAACCTTTATAACATGTTTCGCTGTAGCAAAAAATTC TAAATAA  
GAATAAAACAAGCAGGCCAGGGCTCTAAAATCTCATCGAGTTAACTATACGATTTTTCTTCCCATGGTA  
GTTGCTACAGTAATCC TGTTCCGTTTACAAAAGACTTATCCCTAAAAATAGACTTTTCTACCGGAGGGAT  
ACTGTACCCAATAATATAGAAAAGAGGTATCTGGAGAGCTTTCTTACTTTATTCATCTCCTTTAACCTCA  
TTCGTCCATGCTTATGGACAAATCAATATAAAGGAAT TAAAGCAACTAAAAAGGAGCGAGGCTTCCCTCC  
CCTACAAGGGCTTCACCTCGTGATAAACATGAAAACAATCGCTGTTAATAGTTCAAAGGCGGCACAGCA  
AAAACCTCTACAACCC TCCATTTAGGAGCCGCATTAGCGCAATATCATAAAGCACGCGTTCTACTCATCG  
ATTTTCGATGCACAAGCGAATCTTACGGCAGGATTAGGCCTAGATCC TGATTGTTATGATAGCCTTGCCGT  
TGTTCTACAAGGAGAAAAAACATAGAAGAGGTCATCCGTCCTATTGATTCCTCAGGATTAGATCTCATC  
CTGCGGATACTTGGTTGGAACGTGTGGAAGTCTCTGGATCTTTAGCTGCTGATCGTTATTCCTCATGAAC  
GATTAAAGATTATTC TTTCTAAGATAGAACATCGATACGACTATGTCATTATCGACACACCTCCTTCTTT  
ATGTTGGCTCACAGAATCAGCTCTAATCGCTGCTCAGCATGCACTCATCTGCGCTACACCAAGAATTC TAT  
AGTGTTAAAGGCTTAGAAAGGCTTGCCACCTTTATTC AAGGGATCTCATCGCGACACCCCTCTCAATATTT  
TAGGAGT CACGCTATCTTTTTGGAAT TACAGAGGGAAAAATAACGCAGCCTTCACAGAGCTAATTC AAAA  
AACGTTCCCTGGGAACTTCTTAAACACGCGCATACGCAGAGATATTACTATCTCAGAAGCCGCTATCCAT  
GGGAAACCTGTTTTCTCCACAGCCCCCTCAGCGGAGCCTCGGAAGACTATCTAAAATTAAGTGAAGAAC

TGCTATTTTTGTTAAGGAACATCTAACGTTATGGGAAATATTTAAAACCCTTTTAGAGAATCGCTTTAAGA  
AACCTACACCCGATAAAATGGAATCCCTCGCTAAAAAGCGTTTAGAAGGAGAGCTTCTCCTTTCTAAA  
TGGGTTTACTAATCC TAAACTCTCTTCGCAAGAGGAAGCTAGATTC CGTCAATTACTAGAA GAGTACTCC  
TTTTCCAAGGAAATCTCCATAACGATCTCCAACAACGTGTGTCACTTATCTGCTCAGGTTAAACAGATTC  
ATCATCAAGCTGTCTTCTCCATGGTGAGCGAAT CAAGAAAGTTCGTGAAT TATTTAAAAACCTATCGAGA  
AGGAGCTTTTTTCAGCTTGGCTCTTACTCACCTATGGGAATCGGCAGACACCTTATAATTTTCTGTATTAT  
TACGAGCTATTC TCAGCTCTCCAGACACTCTTAAACTCGAGT TAGAAAGACTGCCTCGACAAGCAGTGT  
ATACACTAGCTTCTCGAGAAGGCTCGCAAGAGAAAAAGAGGAAATATCCGTAAC TATCAAGGTGAAAC  
TCGTGGAGAACTCCTAGAAATATCCGTAGAGAATTTCCGCTACTTCTACCGATCGACGTCAATCATCC  
CTTGCCCAACAAGCCTTTTCTTTTTTTGCAAAAGGAACAAAATTTATTACAGCGATGTACAGACATTTCTC  
AAGAAGAGCTCCTCTCCCTGGAAAAATGATTTAAAAAGTTACAAAAAGTTACAAC TAACTTCTTTCTAA  
CACTAAGGTATCCCGTAATGACGACGAAACCCAAA ACTCTAGAAATCGATAACAACACGTTCTCTGCTTTT  
GGAAGGCAATTTAAAAA GAATTTTTGCCACGCCTATTGGGTATACAACGTTTAGA GAATTTCAAAATGTA  
GTGTTAACTGCGCACAAGGACAACAGGAGCTTGCAAATTTTTTATTTGAGATGTTGATCAATGGGAAGT  
TGTTGCAAGAGCTACCTGCAGGACAGAAACAATCTGCACAAAGTCTAATTGTACAATTTATGATGCCGAT  
TCGTGTTGCGAAAGGATATCCATGAGCGCGGTGAATTCATCAATTTTCACTTCCGATATGCTAGCTCAA  
CAGGAACGCTGCGTATTTTTAAACCGACTCTCTC GAGTTGATGGGCAGGAATTTCTACTCATGACGGATG  
TACAAAATACCTGCCATCTCATCCGCCACTTACTGTCTCGTCTGCTTGAAGCGCAAAAAATCC TATCGG  
AGAAAAAATCTCCAAGAAATCC AAGAAGATCTCGATTC TTTACGCGCTCACTTTGAAGAATTAACGAAA  
TCTGTGTAATCTATTCCTAACAATCATCTTTCTAAAGATGATGTTACACAGCCCT GAATCAGACTATTT  
TTAAAAAGCAGGCTTTAGGGCTTATTTTTCGTAAAAATCCAGAGATGTCTTGCATCGATAAAATTAAGAA  
TTAAAGAAAAAGCAAGGAGCGAGGTTTTTTTCGCTCGT GAGTCAACTATGAAAAAAAACGCGTTCTTAC  
CGGAGATCGCCCTACTGGGAAACTTACCTAGGGCATTGGATCGGCTCCATTATGAATCGTCTCCAGCTA  
CAAAATGACTCTCGCTATGATTGTTTCTTCAATTATAGCAGATTTGCACACGCTAACTACTAAAACGCGCA  
AAGAAGAAGTCTTCAAATAGATAATCATATTTATGACGTTCTTGCCGACTGGCTTAGCGTAGGAAT TAA  
TCCTGAAAAATCCGCAATCTACCTGCAATCGGCTATCCCTGAGATTTATGAAT TAAATCTCATTTTTTCC  
ATGCTTACCCCGTTGAATCACATTATGGGTATTCCTAGCATCAAAGAAATGGCCAGCAATGCTTCTCTAA  
ATGAAGAAAGCCTATCGCATGGACTTATAGGATACCC TGTATTACAAAGTGCAGATATTC TACTTGTCTAA  
AGCACATCTTGTCTCTGTTGGGAAAGATAATGAGGCTCATGTAGAGCTGACTC GTGATATTGCCAAAACA  
TTCAATCGGCTCTATGGGGAAGTGTTC CAGAACC GATATTC TGCAAGGAGAAGTACAGCCCTTGTAG  
GAACCAATGGTCAAGGGAAAATGAGTAAATCCGCGAAT AACGCCATTTATCTTTCGGATGACGCAAAGAC  
AGTACAAGAAAAAATACGAAAAC TATACACGGATCC TAATCGGATTCACGCGACAACCC CAGGAAGAGTG  
GAAGGGAACCC TTTATTTATCTACCAGATCTTTTTAATCC TCATAAGGAAGAAGTAGAAGAGT TTAAGA  
CTCGCTATCGTCAA GGATGCATTAAGATGTAGAAGTAAAAGCTCGTTTAGCAGAAGAAATCAATCTTTT  
CTTAAATCC TTTCCGAGAAAAACGTAGTGAAT TAGTTGCTCAGCC TAAATTTCTCGAGGAAGCCTTGCAA  
CAAGGAACGGAAAAAATGCGTACCGTAGCTCGAGAAACCATGGAAGAGGTGCATGACCATCTA GGAT TAA  
GCCGAAATGGCGGACTATTC TAGCTCTTCTAAATAAAAAATCTTAACTAATCCATTGTGTGGGAGG  
AGGAGT TCTGAAACAGCAATTTGTATTACATGCTCTTTCTCCCTTGTGGAGATCAGCCCGAAGCAATT  
CGCAGACTATCCCAAGGGAT TACAGATGGAGTCCCTGCACAAGTTCCTTAGGAACCACTGGATCCGGAA  
AGACTTTCACCATGGCAAATGTTATTGCTAACGTGAATGTTCCC ACTCTGGTACTTGCTCATAATAAAC  
TCTCGCTGCCAGCTGTACCAA GAATTTAAAGCCTTCTTTCCAGAAAATGCAGTCAATATTTTATTTCC  
TACTATGATTACTACCAGCCTGAAGCCTATATCGCTCGTAGTGATACGTACATGAAAAAGCCTTCTTA  
TCAATGATGAAATGATAAGCTCCGCCTTTCAGCAACACGTTCTATCTTAGAACGCCGAGATACTCTTAT  
CGTTTCTCTATTTCTTGCATCTATGGAATAGGATCTCCTGATAACTACTCTTCTATGGCTCTCACATTA  
GAAGTTGGTAAA GAATACCC TCGATCGCAACTCTCTTCTCAACTC GTACGCATGCACTATCAGGCCCTCT  
CTACACCACAACGGAGTGCCTTTTCGTGAACGCGGAAGTGTCAATTGATATCTTCTTGGCCTATGAAAGCGA  
TCTTGTGTACGACTCGAATTCATGAACGATACGCTTATTTTCGATAGAGTATGTGGATCCATTAAC TATG  
ATCCCTCCCATACCACCTCGTCCATCACTCTCTATCCAGGGT CGCACTATGTA ACTCCGGAAGCTGTTT  
GAGAACAAGCGATCCGCACAATCCGAGAAGAACTC GAGCAACGCATGCTTTTTTTTTGAAGGACGTCCTGT  
AGAACAAGAAGCCTCTTTCAACGTACCACGCATGATATCGAAATGATTTAAAGAAATTTGGATTTTGCAA  
GGAATCGA GAAT TATTC CCGGCATTTTACAGGGGCGCTCCTGGAGAGCCGCCAACCTGCCTCTAGACT  
ATTTCCAGATGATTTTCTTTTAAATATCGATGAATCTCACCAA ACTCTTCCACAATTACGTGCTATGTA  
TCGAGGAGATCAGTCTCGAAACAGTCGCTAGTAGAATATGGATTCGACTCCCGTCCGCTTTTCGATAAC

AGACCGCTCACCTATGAAGAAGCTCGTCGTTATTTTCATCGTGTAATTTATGTATCCGCAACTCCTGGAG  
ATCTGGAAATTC AAGAAAGTCGTGGACATATCATCGAACAAATCATTCGCCCTACAGGAATTCCTGATCT  
CTTACCAGAGATTCGCCAGCTAAAGGACAAATCGATGATCTCTTAGAAGAAATCCGTCAACGGCTCCGT  
AAAGATCAAGAAAAATCC TTGTTATCTCCGTAACAAAAAATAGCTGAAGATATCGCTGCCTCCTCG  
CAGAGCTAGGTATTGCTGCTGCATATCTGCACTCAGGAATTGAAACAGCAGAAAGAACGCAGATCC TTAC  
TGATTTGCGATTAGGGAATATCGATGTATTGATTGGTGTCAATCTTCTTCGTGAAGGGATTGATCTACCA  
GAAGTTTCATTGGTAGCGATTC TTGATGCAGATAAAGAAAGGGT TTTTACGTAGTAGCGCCTCTCTTATTC  
AATTTTGTGGACGCGCAGCTCGTAATATTCATGGGAAAGTGATTTGCTATGCAGACCGCATCACTC CATC  
TATGGATCATATGCTCAAAGAAACAGAACGACGCAGAAAAATACAGCTCGATTACAATCAACAACATAAA  
ATCACTCCGCAACCTATTATTAACC GATCTTAGCTAATCCGATTACTAAAGAAGCTGGTCAAGAAGAA  
CTCGTTTAAAAATGCAATCTTCGAAA GAGTTGGAAGCCTCTATAAAAACCTATGAGGAAGCCATGTATCA  
AGCAGCTCAGGAGTCCAATTCGATGAAGCTGCGAAGTACCGTGATTTGATGAATGCAGCAAAAAAACAG  
CTCCTCTTTTCAAAAAGGAGAAGAAGAAAATGGGGACTGAAAAGGATACCACAGAATTGAATCCCTCGCTA  
TGATCC TTTTCTACTAAGGAATCTCCTCCGAGCCTTCTCTTTGTATTGCGGTCATACATGCTCATCGG  
AGGAAATTAGATAAAAACGAGCGAACTGCTTTTCATTAACCGTTCTAGACAAGGATCTTGTTATGTTTGATG  
TCGTCATCTCCGATATAGAAGCGAGAGAAATTTTAGATTCCTCGAGGCTATCCCACATTATGTGTTAAAGT  
CATCACTAATACAGGAACCTTTGGTGAAGCGTGCCTTCTTCTGGAGCATCTACAGGCATCAAGGAAGCT  
TTGGAAC TGCGTGACAAAGATCC TAAACGTTACCAAGGGAAAGGGGTCTTACAAGCCATTTCTAATGTGC  
AAAAAGTGCTGGTGCCCGCTTTACAA GGATTCAGCGTATTTGACC AAATTACAGCTGATGCGATTATGAT  
TGATGCTGATGGA ACTCCGAACAAAGAAAAGTTAGGAGCTAATGCGATTC TTGGAGTCTCCCTAGCATT  
GCAAAAGCTGCTGCAAATACTTTACAGAGACCTTTATATCGGTATCTTGGTGGATCTTTCTCGCATGTGC  
TTCC TTGCCCTATGATGAATCTCATCAATGGCGGTATGCATGCTACAAATGGTCTCCAATTC CAA GAAT  
TATGATTCGTCCAATTAGCGCTCCTTCTCTAAAAGAGGCTGTGCGGATGGGAGCAGAAGTCTTCAACGCC  
TTAAAAAAAATCTTACAGAATCGACAGCTGGCTACAGGTGTTGGTGTATGAAGGCGGATTTGCTCCTAATC  
TTGCCCTAATGCCGAAGCTCTGGATCTACTCTTAAACAGCAATCGAACTGCAGGATTCACACCTAGAGA  
AGATATTTCTTTAGCTCTCGACTGCGCTGCTTCTTCTTTCTATAATACCCAAGATAAAACCTATGATGGG  
AAATCGTATGCAGATCAAGTGGGTATACCTGCGA ACTCTGTGAGCACTATCC TATAGATTC TATCGAAG  
ATGGGCTAGCCGAAGAAGATTTTGAGGGCTGGAACCTCCTATCCGAGACTTTAGGAGATCGTGTGCAACT  
AGTTGGAGACGACCTATTTGTGACGAATTC TGCATTGATTGCTGAAGGAATCGCTCAAGGACTTGCCAAT  
GCCGTTCTCATCAAACCAAACCAAATTTGGAACACTTACAGAACTGCAGAAGCTATTCGTTT TAGCAACTA  
TACAAGGCTACGCTACCATTC TTTTCGCATAGATCAGGAGAAACAGAAGATACTACCATAGCAGACCTTGC  
TGTCGCTTTTAAATACAGGTCAGATTA AAAACAGGGTCTCTTTCCCGTTCTGAGCGTATCGCTAAGTATAAC  
CGTCTAATGGCAATTGAAGAAGAGATGGGTCCAGAAGCTCTATTC CAAGATTC AAATCCCTTTTCTAAAG  
CATAGGGAACCTTCGAAAAAATAGCTGGGAAGGGAT TGCTTATAAGATCCCTTCCCCCCCCCTTTGCTTG  
AGGATTTTTCTCTGGGAGAGTATGTACAAC TTTATTAAGCTCCTCTGGGGAAAAAAGAGAAATGACCAT  
CCCTATTCATGAGAAT AAATATTC CATGATCTCCTTACACGCACGATAGGTTTTCGTTTATGGCTTATC  
TGTGTGGCCGCTATTATGTTCCCTTAGGGATCAATATCTTGCAATTGAACCTCAGCAATAACAAGAAAA  
CACTCTCCTCTATCACTTCCGATCTGCGAGAAAATGCTTTATTTAAAGCTCACACTTTACAACAAACTAT  
TCCTTTAAATATTGATATCC TGGCTCTCTTTT CAGAAATTTTTGATCTAGACAGAGGAGTCCCTGCTGAA  
CCGGATCTTGCTCTAAGTAAAGAAATGGAGAAGATCTTTC ACTCCACTTATAAAGAGATTTCTCTAGTAA  
AAAAAGAGGCTGATGGGAAC TTTA GAGT CGTTGCTTCTAGCCGCATCGAACAACTTGGTAAAAACTATAA  
CCAAGAGATTTTCTATCAGATTC TCAACCATTTCTCGCTACTTTGCGACATTC CGGTTCCGATTC TCAG  
GTTCTGGCTGTCTTACAACGAATATTTTTGATATCAGCTCTCAAGAAGTCTTGGCGTACTCTATACCC  
TTTCGGATACCAACTATTTATTAATGGAT TACTTGCAGCTAAAGATCCCTCTCTCCGTA AAAACTGCAAT  
TCCTCTAAAAATGGCATCATTC TCAAGCAACAGATTCCTCTTTAGATCTTGATCAATACACAAAACG  
GTTTCTAAAGAGCAATTTTGTGATGTTTTCCTTCGCGATGATATCTGCCCCCTCATCTCTTACTACGCC  
CCCCTTTAAATCTCGATCC TCTTCCCTTATGGCGA GAATTTTCGTTTCATTTTGCATTTGGGAACACAGAAT  
GTGGGGATATATCCACTCTCTACCTGAGATGGATTTCCGCATATTGACTTATGAAGAAAAATCTATAATT  
TTTGCTTCTTTATGGCGACGAACCTTACTGTACTTTGCTTATTTTTGTTGCGTACTTTT TAGGAAGCATT  
CAGCTTTTTTAGTTGCAAAACGCCATCCAAGCCTATCCGGAAGCTGGCTACGGCCATGATGGAAACTCG  
TCGCAATCAACACCATCCATATGAACCCGATTC TCTGGGCTTTGAAATTAATCATCTAGGAGAAATCTTT  
AACTC CATGGTGCAAAGCCTTTTCGCAACAGCAATCTTTAGCAGAAAAAATTTTCGAGATCAAACAGCATG  
CACAAAATGCATTACGACTAGGAGAAGAAGCTCAACAACGCCTGCTTCTAACCAGCTGCCTGATTC CGC

AACTACAGAAATCGCTAAAGCCTATATTCCTGCAGTTACGGTAGGAGGAGATTTCTTTGATATCTTTGTT  
ATAGGCGAAGGTCCCAAGCTAACTCTTTCTAATCGTTGCTGATGCTTCCGGGAAAGGAGTCAATGCGT  
GCGCCTACTCCTTATTCCTGAAAAACATGTTACATACCTTTTTGAGTGAGCTCTCCTCTATTC AAGAAGC  
CGTTCAACAAACAGCTGCTCTCTTCTATCAACAGACAGCTGAATCTGGGATGTTTGTAACACTATGCATT  
TATTGTTATCATTACGCAACACGAGAACTAGAATACTATTCCTTGTGGCCACAACCCAGCGTGTCTCCGAG  
CTCCTAATGGAGATATCTTTTCTGTCGCATCC TGGTATGGCCTTAGGATTTTTACCTGAAGTTCCTCC  
TCACCC TGCTTACACTCTCGTTCTTGAAGAGGAGTCTCTTTTAGTGCTCTATACCGATGGGTGACTGAA  
GCAAGCAATAAGCATGGAGAGATGTTGGAGAAGAACGCTTAAAAGCATTAGTGGCTTCGTTGACGAAAC  
AAAGTGCCGAAGAAGCCATCCAATCTATCATGTTCTCTATTAAGTCTTTTGTGAAAGATTGCCACAACA  
TGACGATATCACTTACTCGTTTTGAAAATACCTAAGGAACCTTCCGCTTATTAGTCTTCGCATATCTTA  
AAAAC TTCCTAACGAATCCTTGTAGATTTTTTCTTTCTACTTCTTTATCGTGCCGTTAAGAAGCTTTT  
TTCAGTTATCTTCTTAAAATATATGTTTTAGGTGCGGAATGAGACAGACATTCACCAAAA GAATCC TTC  
TTTTTCTTTTCTTAGTGATTCCTGCTCCTCTCCTTCTCAATCTCGTTGTCTTTCTTTCTTTTCTTTCG  
GGCTGTTAAAACAACGATCATTCAAGGATCTGCATACCCGCACAATGAACTTAATTTAGAATCGAAAAG  
AAAATCGCCATTCAAAATATTTTTCTGAAACGTTTAGCGGAAACGTTAGCATTA AAAACCC TCACAACCT  
CACATGATTTTTTCACTGAAGCTTATAGTGAGATGATTGCTCTCGGAGATACCGATTTATCCCTCTGCCT  
ACTTTCCTCCGCTAACGATAGCATCCGTACAAA GAATCC TCGGGATCC TTTTGTTCGTTATATAAAAAGCT  
CATCCAGAAATACGTGATAAGCTTATCCAAAATCC TGGGAATGCTAGCCTTATCTCTATTTCTGAACGCC  
CAGACACCGAAGATCATTACCTTGTTTTTGCAGAACCACCTTCTATCTACGAAGACCCCTCATTAGCCGG  
CTGGGT AATTGCTTTCTATTCGATGCAAAAACACTACGCAACTATCTCTTCCATAACAAACAATCC TATCAA  
GATCTTCTTTGCTATCTCAACCATAAGGGAAGACTTCTCTTTTTCAGACTCATCTCTTTTCAAAAATGGAG  
CTTTTTCTCTCTCCATGGAAGGATATCCCGCTCTCTCTTTCAGAAAAGCTTCTTATCC TTTAGAACCCTC  
TCCTGAAT TATTTAAAGCTAAAGAAGCTTAAAAGTTTCCATACACGGGAAAACCTTCTTAGCCTATTTA  
TCTCCTTGGCAGCCTATACCACATACCCATTC TCTTGCCTGATCCCTCTATCCACTTGCATTACACAAG  
CCTTACGGCTTCCCATCAACGTAATCTTATTC TATATCCCTCGCTTTTTCTTTGATGGGATGGGTGCTCTC  
TTGCAC TAGCAAACGATTA AATCGTCCCTTACAAGACTTCTGTCTCAGTATGGAATCCGCGTGGAAGGC  
AACCAT AATGTCCGCTATGAGCCGCAACCTTATGGCTATGAAATCAATGAACCTGGGGAATATTTTTAACT  
GTACTTTACTTCTTCTGCTGAACGTCAAAGAAAAAGCTGAAATA GAATATATTTCCGGAATTTATTACA  
AAAAGAGCTTGCTCTTCTCTCTTCTTAAAAGATACCC TCTCTGTCAACGTTGGAATTCCTCCCAGGA  
GGAAC TTTCTCTTTGCATTATTTACAAGGAGAACAACAACC GGATATTTTTATGGTTGGGTGCCACTC  
CTGAAAAGATCGCCTCTTCGGAGTGATTGGAATAGCTGGAGATATCGGACTGCCTTCTTATCTCTACGC  
ACTC TCTGCCCGCAGTTTATTCCTAACGTATGCAAGTTTAGGCTACTCATTACCTTCTATTTGCCATAAA  
ACGATGCGAAGCTTTGATGAAACAACGTAGGCAATGAAGCTTCTGTTTCTATAGCTTGTCTTGAATACG  
ACCTTCTTCCAAGTCATTGTCTGTTCTAACAGAAGGTGCTAATCC TCCAACTCTATTCATAAAAACGACA  
AGAACATCTCTCACGATGTGAGAACAACAACGTATTGAGACCGGAGATATTC TTTGTTGCCTTACTGGA  
GGCCCCACATCATTCAGTACTTGAAAACACTCCTATAGAAGCATTACTAAAAGATCCCTCTCGCTCCAC  
TCAATTC TAAAAACTTTGCAGAGATGTTAACAACGATGCTGAGAAGTAAAATCAAACGCAGATCGATGG  
AGCTGTAGGCTTTTTATCC TTTATCTAACAGTCTCTCTCTAACTAAAAAAGCCTTTCCGGCAATCCACTT  
CGATAGCCTGGTGGAGGGGCCATTC CGTAATCTATGGGATTCGGATACAACGCCCAAGGATCTCGAACAG  
CAAACCATCGTTCTTTATTTTCTGAAGGACGTCCACCAATCC TAAATAATTAAATTC CCACAAATCCAT  
CTCTTGGGT TCCA GGATGCAAAAATAAAACCAAAATACCGGTAAGCCCAATTCGTATCACCAAAAAGAAGC  
GGAGCTGGATAGGCTAACCCATAGTGACGCATAGCAGCAATCAGCCTCATAGAAAGATCTTCTTCATGAT  
AAACACGCTGATACCCAGCCATTAATAAACCTTTATACAGATGCTTGAGATCC GAGGAAGATAATAGCGA  
ATGCTTCCCTACATTC TCTTCTAGTAGGGTAGC GAATCGATCATA GGATATCC GAGAAGAAATCCCTAAA  
TAAGAAGAAAGATCACTGATAATCTGGGTAAC TGTGTTAGAAAACATAAGGCGCTTCATGTACGAAC  
GGCTCGCTAAATATTTCTGTAAAGTAGCTACTACTTCTCATCATGAACAGTGCAGTGAAGAAAACGCGA  
GCTCTTTTTCATA GAATTCAGGAATAGATAACGAGAGATCATCACAAAATATAAGAAATCTTGGGT AAGT  
TCTTGGAGATAGTACCGTGTACAGAAACGTGTAATAAACGCATATATTTGCCGATTTATCGAAAA GAGTAC  
GCTTCAAAAATCC TGATGCTTAGAAAGCCACACATCTCTCAGCCAAGTATAGCTATACCAATCATTAGT  
CCATGCATCTCTAAAATAACGGAGCTCCTGCCGTAACAGAAAACACATGCGAAGGGGCTGTGCTAATAAA  
GAATGATCCCATTTTCTACATAATCTTTTACAGCCTCAGGAAGATCTTTCAATGCATCAGCAAAAATG  
CTGCCA ACTCATGC GGATCCGCAGGCAATTTTTCTAGTTTGAC GAGTGGTTTC GAAT TTTCAAAAATAATC  
GCCTACTAAAGTCGTTACTGTTCTCCAGAAACATAAACCC AAGGGGTATGCGTAACCTTGATCTAAATGC

TGGAAAATCCCTGTGGAATAGGACAATTATAAGCTTTCAAGATCCTTTCCATTGCAGCCTCCTGAAAAC  
GAGGCTCATGTAAAGCCGATACAATACGATGCAAAA GAATAGAAGTTTCTTTTCTAATCCAGAAACATT  
ATGCTTCGCTAGGAGATCTCCTTCTATAGAAGTAAAAA ACTCCGTCAAAGCAT GAATAAATTC TTCGATA  
GAATAAATCGGCTCCACGTGTTA GGATGACTC CTCCCATAGGTAAATAATATACGAAAGCCCGCAGGAA  
CATCTTGATAATTC CCAGAAA ACTC TCTAATAAAAAGCATCGTATACGCTACGGAAATAGTTAG GGAT TTC  
TCGT GAATAAAAAGACAAGAGAAAAGTCTGGTAGCATGATCATTTTTTTTTCAGCTTCTCTTGCGCAGCATTC  
CAATCTTGTAAGCTTG ATTC AATTC TTGTGCAAAAACGCACATG ATCC ATAGCCA GAATTTGGCTATCTT  
GTTTATTGATC GGAT TACGCATCC GACTTTCCACAT ATTC TAACTGCGCTTTTTGCTTCTTGATATGTCTC  
TTCACATTGTCTGCAAAGGCTTGTGTCGTAGCTACTTCTTCTGCTAAAAATCTACGTATAAATTCACGT  
AAACC ATCC TCATCATCACTGGTCCAACCTAAAGCAATTTGTAAATGCTTGGTGGTTGTTGTTTACTCG  
CATCTGCTAACGTTGCTAACGTAT ATTC CCACGATTTCAATAATAC ATTC TGTGTATCACGAATAAATCC  
CAGTTTTGCTTGCTCGTAAGATTC TAAATAGCTAAGTACACGTTGACT ATTC GTAGACAATAAAACCGTA  
CC ATCC CCTCGCTCTTTACGGAAAACCTTCTGCAAAAACGGAAGCTTGCCTGTAGAAAGAGAAAAGCTGAT  
AGTGATGTAACAACT ATCC TGAAT GACATCATGAGCTGTTATCTTCCCAT GAATATCC TGAACTTTTTG  
ATAGATAAA ACTC ATTAGCTAGTAGGTTTTGCACCTCACCTGCGAT ATCCCTGTTGTTGGAAATATGCCA  
GAAGCTAC GAAT GCTGCTTGTAATCTGACGAAGCAGCAAGAGT AGCCACAGGAT TGGGATATAAATCCA  
TTACACAAATAGGCTTAAATAAATCTCCTACACACGGTAGAAGATTGATCGGAACGGAATCTCTCGATC  
ACCAACGATACG GGAT ATTTTTCCCGGAAGATAAATAAATCTTCCAAATCACGAATAAATAAAT GGATAC  
TC CCGAT GGAT AAGAAT TGCTAATGCTGTTGCGAAAACAAGATCC GACATCTTGTGCGAAATAGGTAATA  
ATGCGACTAAAGCGGCTTACAGTACATGCCGTACGGTTACTGTCTCACTAGCGGGCAGCGCTAACGT ATT  
CCGAAT TAAATCTTGA ACTC TAGCGTAAGAAGGTACAAAAACCTTTCGAAAACGATTTTTAATTTCTTGA  
TC ATCC CGTAAAA ACTC CAGCATCTTTAATACATGCTCAC GAAT CGGCCCTTCTCCCTGGCGATACGGTC  
CTAAG GGATATAAACATTTTCGTC AACAGCT GAAT ACTTTCAACA ACTC GACTAAGTTCCAAATCTCCTTC  
TTC ATTC AGGAT ATAACCTGGCTAACTTCCCTTGCAATAGCAAGATTTTTTTTTGCTAAAGCAACTTTGCTA  
TACGTTGTGAAATCTTGCAGGTTCTCACACACAAAACCTCCTCCAGTAAGGAAGCTTTTTTCTTTATTAG  
CTAAG GAAT CAAATACAGAAAC ATCC AAACGAGACATGACGAAGAAAG GAGT TTTTTCTCTCCCTTACC  
ATG GAAT AAAATTTGCGATGCAATCTTTCGAAACTTAA GAGT CCCCATCTCCAAAAA ACTCTCTGTT ATTC  
TCTGTTTTTTTTCTT GAAT AACGAGGAAAATAATGCTCGCAAGAAAAACGGGAAACCTCAC ATCC CATAG  
CTGAAATGCTTTCTGTTAAAGGCAACTTTTTTAGGACAT ACTC GCACACAATTATGAGCCTGCCAC ATCC  
TTCT ATTC CTC GGGT ACCCATCAATGCTCGTAACCG ACTC TCTCGACGTTTCTCTCCA GGAT AAGCGTTA  
AAATAACGCGCTTGCAGCAATAGCGGCTGGCCCCATAAAATCACTTTTTTCACTTACTTGTGGGCAGGCTT  
CCGTGCAACAGCCACAAGTCATACACATCGACAAA GAGTACATTAAGTTTGCTTCTTGTAGAGATTTT  
AGGGCTGCGCCTTCCACATTTCTCTGCAGAA ATCC ATCC TTGAAT CTCTTCTAAATTTTTTGAACATA  
ACAGAGCGATCTACAATCAAATCTCGACTAAAGGGAACCTTAGAAAGAGGGGCTAACTTGATCTCTCTTT  
TAGC ATCC ATATGCTCAT GAAT TAATGCAGTGCAAGCTTGTCTTG GAAT ACC ATTC ACTAAAACGCACA  
AGAGCCACAAACCTTCTTAGACAAGCCTGTTCCAAACAACA GGATCC ACACGCTCTCCAT GAAT ATTT  
ACA GGATTC TTTTCAATTTCCATGAGAGCACTGATCAC ATTC TCCCCT GGGT GTAGTTCCA ACTC AAAAC  
TTTTCCAATATTATTTCCAGGAACGCCTCTATAAAT ATTC AAAATAAATGTCTCTTTCAAATTAGCCTC  
CTATATCGGGAAAT GAATATTC GCTG GAATATTC TCTAGCACGACATCTTTGCTCCCTGTC GAGT GTAA  
TCTCGTA ATTC TGGATTC ACATGGC GGGT ATCTACTTTCTTATATGAAATTTCTGGCTCATCTACAGAAT  
ATGTAGCGATCGTAGTTTTTAACCA ATTC ACATCATCTCGTTTCGAAA ATTC TGGTTTGTAAATGAG ACCC  
TCGAAA ATTC GTTTTCTTAAATAAAGCTCCTGTGCTGATAGCTAGTGCAAGCTCTAACATAGGTTCCATTTGT  
CGAACAAAATGAAACGTTTTT ATTC GCAAATCGAGAA GAAT CGTGTACCGAAACTTTTTTT ATTC TTTCTC  
TAA ACTC CTTTAACTTGTGTAGAGT TTCTTCAAGAGCCTTGTCTCCCTTTTACGGTCACATTACTGAC  
CATG ACTC GCGCGATCTCTTCATGCAAAGCAAATGCATTTTCTCCTTGCAGAGAGAGAAT CTCTCGA  
GAGATCTTTGCTCTTGTGCAAAGCTTGATTAAGATCTTGTGG GAATAGATACAACTTCCGAACGATT  
CCACAAATCGTGCCGCTTCATCTCCTGCGACTA ACCC AGCGTATAAACACGCTAACAAA GAAT TAGCTCC  
TAAACGATTGGCTCCATGATATTGAAAATCTG ACTC GCCACAATTAACAACCTGGGATATTC GTCATA  
TGTCGATAGCGACTATCGCG ATCC CTATCGTCACTGGCAGGCCAATCT ACCC AGGCGCCTCCCATAGAAT  
AGTGCACCGCAGGAAAAATGCGCATAGGGACTTTTTTA GGAT CTTCACCTGTAAAATTTATGATAGATATC  
TAAACAGCCTCTAGCTT ATTC AGAGT CTCTACAGGTAGAT GGGT TACATCTAAAAACACTTCGTGACGA  
CCATCAAT ACCC AGACCTGCCTCACATACCTGTAAAATAGCTCGCGCTCCGACATCTCG ACTC ACTAAAT  
TGCCGTAAGCAGGAT ACATCTCTTCTAGAAAATACCAAGGCTTGCCTGTCTCTCCGCAAGGGCGTCGCGA



ACCATCAGGGAAAATAATCGTTTTGGATGAACACCTAGGCACCCAAACTCTTCCTCCTTCACCACGAACC  
GATTCAGAAATCAAACGCAACTTATCTAGTCCAGGAATGCTGTCGGATGAATTTGAATAAATTCAGGAT  
TCGCATAGTGCATGCCTTGCATGAATAATCGACCATTTGCAGCTCCTGTACAGATAGTCCGAGTTGGTAGA  
CATTTGAAAAATGACACCCAAACCACCCGTTGCAATAATCACCGCATCACCTTGTATAACCTCTAAACGG  
TGATTTGAATAAATTCATGACGACAACGCCACAAGCTCTTCCTCCGTATTGGTAATCAATCGAACAAATT  
CATGATTTTCTCTTTAATGATCTTCCTTGCCATTCACGACGACGTACCTGCTCATCCATGGTGTACAT  
CAACTGCTGCCCTGTGGACGCTCCACAAAAGACTGTGCGATGATAGAAGTCCCTCCGAAACGCCGCACA  
TCGAGTTTCCATCTGCATCACGGTTAAATGGACACCCGAACCTATCCAGCATATGAATAATGCGTGGAG  
CGGTAAACACATTTCCAATACAGGAGGCTGATCTGCTAAAAATCCCTCCTTTTATCGTATCGTAAGC  
ATGAATGTATGGGGAATCATTTCCTTTGAGATTC AAGGCTGCATTAATTCCTCCTGTGCACATACA  
GAATGCGATCGCTTACCTTAGTTAAAGAGAAGCTCTACTAAAATACCACGATCTGCAAGTTGCATAG  
CGGCAGATAGCCCAGCAAGTCCCCCTCCAATGATAATGACTCGACAACGCTGATTCATCATAACAAATAC  
ATATTCCAAATTACGCTGATACCCATAGCCATCACAAACACACATCCCTACGTAACATAAGATCTGACATA  
ATCGGAGATAGCGGAAGAGATAATGATTCCCCATCGCGAGACAAACGTCCATACTCCATTAATAACCCATG  
GAAAACAGCAGCTATAACAAAAGCGTATAGAAAAATGCCATCCATAAAGATCCTAGAGCATTCTTACT  
GCATAGAGAAAAGCTTTCCTTGCTTCGAGTAAAAATGTACGACTTGTGTGATGCAAATAAAGCTCGGT  
CTTTTTCTTGTAAAAACTGCTCCGTAATTTGAGGTCCTCCCTCAGCAAATGGAACATTCATAATGAAGAA  
GCCTGTTGTTCCCTGTACAACAGAGGGATATCGAGCCGCATCAAAAAGAAACAGCATAAAAAGTCTTTCCT  
TGGATTGTAACCTGAATAGGATACAAGACAAATCGAAACTGGATTACATGAAAAGCCAGCCCGGCTAATA  
AAATCCATGCCGTCATTCCTGTAGAGTATATGCCAGATTCCTCCCGTAACGTAGGTGTTCTTCCATCTG  
AAGAGAAAAATTCCTCTCCCTCGAAGAAGATAGCTAAATCCGATGATGGAATGAATACCAAGCGGAAG  
AGCTAAACAGGTAATCTCAATTACCTTCTAGACCAGGAATTTTGTGAAACAGATCCTAAGGTAATGAAC  
CCTTGCTTTTAGCTAAGAAAGAAGAGGCTAAGATATTTGTAAGGAGATGTTCCACACAAAATAAAGTAA  
ACACACATCCCGATACGGAATGAATACATCGTATAATGAAACGAATGTAGGAAGATTTTTGTACTATCTC  
CCTCCTCATATGAACGCCTCCTTATTCGCCGTCCCTCATGGTTCCCTGCCCTCCATAAAGAGCCCTCCTC  
AAACATCATGATGAACAGCGCACTTAATCGCGACGTTAACAAACAGCAGCTATATCCCTCAACTGAAAGG  
CTTCCATCCCTAATTC TAGGAACCTCGTAACCAACGTTGCACATTTGTACTAACAGCGTCTTGCAATTC  
TAAACAGAAATGCCTTTTATCTCAGCAATACGCGCTAAGGTATGCACAATATTTGCTGGTTTCGTTCTCT  
TACCTCGTAAAGGTGTAGGAGCTAGGTAAGGAGCGTCTGTTTCCACTAATAATCTCTCTAAAGGAATCTT  
CTCTACAAGATCCGCAAGCTTTTAGCATTTTTTAAAAGTCACAATGCCACTAATAGAAATATAACCAATCA  
CGCGCTAATAACTCTGTCGCCTCTCATAAGTCCCTGTAACAATGCAACATAACCAGTTTAGCTCGCT  
GATCCACTCGATATACATGATCTAGGATATGGAAAAATCTTCGAAAGCTCCTCGGCAATGCACAACGAG  
AGGGAGTTCGTGCTGCAAAGCTAGTTGTAATAACGACAAAGAACTTCTTTTTGTCGCTCTTGTTCAGAG  
GCTTGCACAGCAAATAAATAATCTAATCCAACCTTCTCCAATAGCAGCGAGTTCCCATCTTCTGCAGCAC  
GACAAAATTC TTGAAAATCTTCCTCTATATCATCCGCGCATCCGCGAGGAGTCCAGCAACATGATA  
AAACATCCAATCAAGGATAGGCTTCTGCATAAGCAAAAAGACCGTAACA ACTCAGCTTTTGTAGTCGTTACA  
TTAACTACCC TAGTCACTCTGCGGTTTTGCCTCGTAAAACGACATCTCCAAAATCCCTCTATAAACTCTT  
CGGATGAAAGATGTACATGTGCGTCGACTATCTCCATACTTCCCTCATAATCAATCTTTCTCAATCAAAG  
ATCATGAAGGAAGAAGCCCTTTTAGCGGAAAATGTTTCTACTTGAATCGTTCTACTGAGAAAAAACCATC  
TCTTCAAAGCAGATTGCGATAATCTTTCTGGAA GAATAAGCGGAGCTTTGTTCCCGCAGGGTAAATA  
CATAAGAAGGTACACTGGCTCGGCCTAAACGAGCGAGTCTTCTGTAAATTTTTGGATCTTTTTTCGTCCA  
ATCTGCTTCTAAAGTAACTACGCCCTTAGCAGCAAAAAGCTTGCATATTGGCATGAAGAAGAGGCTTATTG  
AGTTGACACGTTAAACACCACTTTGCAGTGAAATTTACAAAACCTGGAATCCCTTTTTTCGCGTAAATCAG  
CTAGCTTTTCGGGAGAAAAGATTGCCAATCAAAGCTATGTGCAGGAGGGACGTTCTCATCAAAAATAACG  
GACACCTATAGAGGTAATCACTAAGGAACTTAAAATACAGAAAATGAATACAACGGAAGCAAGAAGCCGC  
TGATTACGCGGAGATACAAAGGTTCCTCATCTCCCTAGAAATCCATGCACCTACAGCAGCAACCACAATC  
CTACAAGAA GAATAGTTACAGCGGTTGC ACTCGTCTTACCCAAAAATCCAGATAAGCCAAGTTGCAGT  
AGCAAGCAACATAAAACCCAGTCAACTGTTTAAACGTACTCATCC AAGGACCAGGTTTAGGTAATAATGGCT  
AGCATCTTCGGAAGAAAGCAATAATAGATAGGGACTTGCCATTCCTAATCC TATAGCAGTAAAAATTG  
CCAGCTGCTTAAACAAAAGACACTGCCATAACTAATCCAAATACAGAGCCAAGAAAAGGCCAGTGAAGG  
AGTTGTAACCAAGGTAGTCAACATCC CATTGAAAAAAGCTCCCCAGATCTGATTC TTTCTTACCGATGCC  
CCTCCCTCTTCTTGCAATTTTTCCCTTAGGCTCAGACAAATCATTC CCAATCTCAAAAACGCCTAACGAAC  
TCAGAGCAAATAAGAAGAAGACAATAATTAACCGGCAACAAACATGGGTCTTGAAGCTGGAATCCCA

TCC AATATTTTGCCTAAAACCTTTAACAAAAACGCACAAAAGC GAGT CCCCAAAAGCTTACAATAGCT  
CCTAAAGTAAACCAA ATCC CTCCAATCACAGAGGAA GAATGGTGATCTGCCCGGATTTAATTAACCTAA  
ATACTTTCAAAGTAATCAGAGGCAATACACAGGGCATGATGTTTAATAAGATTC CACCAATGAAAGCCAT  
AAGAA GAATAGAGAGAA ACCC CCAGCTCAATGCCGAAAGCTGTTGACTTGATTC TCTTCTACTTGATAC  
GAAGCGACTACTTTCCTGCATC ATCC TTGAATATAA GAATCC CTGACA ACCC AAC ACCC TTAGGCATAT  
TTCTTCA GGAT GTTTCAACTTCCATATGTACGTAGTCGTTGCTCAAGAGGAACCTCTTGAGCATAAGC  
AAAATCTCGCGTGT TTTTCAGCAATGAACCATGCCT GGGT TGCCG ATCC GCTTTCCTGCTGGCACAAGA  
ACATCTAAGCCATCAGGCTGATAAGAAATCTTTATGGCAGC ATCC AAAGGTCGAGGTTGAGCCGCTAACG  
CACGGGAAAAAGT GAAT GTCTCTTTACTATTAG GAAT TAACGGCCCCTGATCTATAG GAAT CACAAGA AC  
CC TTGACGAAGAACC TGGGAGACAAGATGCACCCGAAGACAACC ATTC AACTTGCGCTTTTATCTCCAAT  
GGACGCGTTTCTATCTCTTTAGAAAACGC GAATATCC GCAACCACCATTTGTAGAAT GTTTATAACCAAAAT  
AAACA ACCC CATCC TCTTCGAAAATCTCTGGAGT CGGCCAATGTTCTCCAGCAACCTAC ATCC TGATGG  
CAAATCC CAAGAAATGCGCAAAGGC ATTC CAAGCTTCCTGGAT TTTTCCAGTAGATATGCTCTCCTTCT  
GGAATAGCAATCAAT ACTC CGATACGAAGCACTTCTCCTTCAACAGCTTGTTTCGCTTTCACTAACAAGTT  
CTACTGTAGGCGTAGCTCTTCCACTATTTTCTTCTACACCAAAAACAAGACGTATAGCTGAACAGCAAGCA  
AAGAAAAA ATCC ATACCATTGCC GAAT CATAAACACAAC ACTC TCTCCGTTTTAGCAAATCATCAAACAA  
CAGAA GAGT TGT TTTTGT TTTTGTCAATTC ATTACACACCAAAAA GGAT CTTGGTCTATAACAAGAAATTT  
GTTAGGATCGTCTAGGA ACTC GTTGGTTAGGTCTACGTCTTATGTTCCA ACTC GTAAATA ATCC CATCA  
TTC AGTCC TTTCAAGAAGCCGATCTTTTGGAAAAGTCA TTTTCTTTTCGCTGTTGCTCTTTTCGATATG  
TACATGGACAGTCC TTT CATCAGAAA ACTC TCC ATTC AAAAGAAATTTCTAAAATCAGGGAAATCTTTAAAA  
GAGT TTTTAATAAAAAATCGTCA TTC TCTCTCTCTTTAGAT ATTCATCCT GAATCC ACGCC TTTTACAG  
ACCTCTATTTTACTATCAAACGTGGAACCC TGGAAT TACTAGATAA GAATAGACAGTTGGCTCCAGAACG  
AACTC CTTTGCCTTCCGTGGAAGAT ATTC AATCGTTGGAACCGCTTTTAAATGCAGTGATGCCGAAATAT  
AGAGCTCTCTTAAATAAAAAATAACTTCA TTC CAGCAACGACCATTAGTCTCGCTCCTTTTCTAGGACTAT  
TAGGGACCGTTTGGG GGATTC TATTAGCTTTTGCACATTAGTACCGGACAAGCCAATGGGACGATCAT  
GATGGAAGGCTTAGCAACAGCATTAGGAACAAC TATTGTAGGGCTATTTGTTGCC ATCC CCTCACTAGTA  
GGTTTCAATTATCTACGCGCCACGCTTCCAAGTCTCTCTGGAATCGAGCAAAC TGCTTTTCTTTTAC  
TTAACTC TATTGAAGTCAAATATCGACAAACTAGCTTATGAAACGCTTCGTTTACGAAGATCTAGAAGAA  
G ACCC TAGTGTCAATCTT ACTC CTCTGATCGATATCGTCTTTGTAATTTTGATGGCGTT CATGATCGCCA  
TGCTCTTATTAATAAATGATCGTATCTCTTTAGCCACA GGAT CTTCCTCACACCAAGCCTTCAAAAAACA  
AGAGTCTCAGCAAGCTGAAATTAAGTGTTCGAAACCATAACCATT ACTC TCAATGACCTTCTGTGTCT  
CTCCA GAGT TACGCTCGCAACTAACAGTCA TCC ATGCGCAAC ACC TAATATAGTTCCGCTGCTCTTAC  
AAGACGGTGATACAGCTTTCAAACGTATCAAGAGATCAAATCGACTATCGAAGAAGCC GGAT TTCAGGA  
ACTTCATATTGCTTTGAAGAACTAATGCCAAAATTTCAATATGCCCTTTTCTTTGCGCTCTATAA  
TC ATCC ATATTGCTCTTGGAG GAAT GCTCTTTTCTCCGCGCCTCAAAAAAGAAGCCTCGTCTCTCCCC  
TTTTAAAGAACGTATCGTCGCCCT ACCC CCTGAACCTAAAATCACTACCCTTTACAG ACTC CCTCTCCA  
CAACCT ATTC GTAACCGGTAAAAACGCTCCAGCTCCCGAGAAAAAGCTGCAAAACCTCCCGGATCT  
CTA ACCC TCAAAAATCTCCTCAAAAACCAACAAAGC GAGT CCTACGCCGCGTAATGAGACACTAGAGAA  
AAAAACAAGCT ACTC TCAAAAATTAGCTCAACTAGCTAATCAGCTGGCCGAAGAGGCTGAGACACA GAA  
TCC CACATCGCACAA TTTCTTGGCC TGTCAAGCGCAAGTCTTACTGAAAACAC ATCC TATCAGCAAG  
ATGCCTTCTGTGCTTATTTTCAGCAGTACGT GAGT CTTCTTTCCCTGGAGAGGTTTCGCCTAAAAC TAGA  
AT TTTCTAGAGAAGGCGCTCTTCTCCATTGCTCAATCTTATCTACTATTAGCCATGCTGATAAACACAT  
ATCC TGAACCAA ATTC AGAAA ATTC CTTTTCAATCTTTCTTTAGCGCATACAAAAACCTCGAAAAATATCG  
TTTTTCATATTAGACTGCAGGGAA ATTC TGCTTGATGAAAGGCTCCGTTGTGTTTCTCCGTTCTCTTCTC  
TGCTACTTTGTCTTCTCCCTTCC ACTC TCCACTGTGAAGATTTGGAA ATTC ATGTACGATCAGAAAGCT  
CTCTCCTTCCAATCGCAGTCTCTTTGCTCTCATCACC AAAAG ACTC TCGTCAAGCTTCTATCTTGC ATC  
CCTCCGAGACTTATTTGCTCGCGATTTGGCTTTAGGAGACCTGTTGGCGCTACAAAAGAGCTGGCTCCG  
CAAACGATCTTTATAGAAGCGTCT ATCC CAGA ACTGATTTTTCTTTAAAAAAGA GGGT AAA GGAT CTC  
AAAAAATTTTCTCTCTAGAGCTCTCTGGAG ATCC TTCTAAAGATCATCAAGCG ATTC ATGAGGCTGCAGA  
TCGC ATCC ATTTTCTTCTTACACGCGTTCTGGAA TTAGCTCAGGAAAAATTA TTTTCCCTATGTGCT  
ACAACTC TTCCACAG GAAT TAAAAACAAGGGGA ACTC TGGTCCGTTGATTACGATGGACAACATCTTT ACC  
CACTTACCAATGAAC ATTC CTTATCTGTA ACTC CAACCT GGAT GCATATCAGTCAC ATTC CCGCTTATAT  
GTATGTTTCTTACAAATTAG GGGT CCAAAAATCTTTCT GAATACTC TGAACCAGCCTGCAGGGAAAAA

ATCC TTGCTATGCAAGGGAATCAGTTTATGCCGACTTTCTCTCCTAAACTAAACTCCTCGCCTTTATTT  
CTGATAGAGACGGCAATCCGTGATCTTTTTGTACAATCATTCCTACTAGCTACCGGAGCAATTGGCACACC  
AAAAAACTCCTAAATGAAGCTTTTGGAACACAAGGAAACCCCTCCTTTAGCCCTGACGGCACCCGTTTA  
GTTTTTGTCTTAACAAAGACGGAACGCCTCGTATTTATCAGATGCAAATCTCTCCGAACAACATTCCTC  
CTCGCTTACTAACAATAAATATCGAAATAGCAGTTGCCAACATGGTCTCCGGATGGTAAAAAATAGC  
CTTCTGCTCAGTCATTAAGGTGTCCGTGAGATTTGTGTGTATGATCTGGCTTCAGGAAGAGATGAGCAA  
TTAACTACATCTACTGAACATAAAGAAAGCCCTTCTTGGGCTGC GGATAGTAACCACCTTGTTTATAGTG  
CCGGATCTTCCAATACATCCGAACTATTCCTGCTGAGCCTAATTACCAAAAAAAGTAGGAAAATTTGTTAT  
AGGATCAGGAGAGAAACGTTTCCCATGCTGGGGAGCATTTCCTTCACAACATATAAAGAAAACCTCATGA  
GAAAGACTATTTTTAAAGCGTTTAAATTTATTATTCCTCCTTTTCTTTCTTTCATGCTCTTATCCTTG  
CAGAGATTGGGAATGCCATGGTTGCGACTCCGCAAGACCTCGTAAATCCCTCTTTTGGATTCGTACCTTTC  
TACTCCGATGAAGAAATTCACAAGCTTTTTGTTGAAGATTTTGATTCCAAAGAAGAGCAGCTGTACAAAA  
CGAGCGCACAGAGTACCTCTTCCGAAATATCACTTTCGCTACAGATAGTTATTC TATTAAGGAGAGGA  
TAACCTCACGATTC TTGCAAGCTTAGTTCGTCAATTTGCATAAATCTCCTAAAGCTACGCTATATATAGAG  
GGCCATACAGATGAACGTGGAGCTGCAGCTTATAACCTAGCTTTAGGAGCTCGTCGTGC GAATGCTGTAA  
AACAATACCTCATCAAACAAGGAATCGCTGCAGACCGCTTATTC ACTATTTCTTACGGAAAAGAACATCC  
TGTTTATCCAGGCCATAATGAAT TAGCTTGGCAACAAAATCGTCGTA CTGAATTTAAGATCCATGCTCGC  
TAATCGCTTATTC TTAATAACCC TTTTAGGGT TAAGTTCGTCTGTTTACGGCGCAGGTAAAGCGCCGTCT  
TTGCAGGCTATTC TAGCCGAAGTCGAAGACACCTCCTCTCGTCTACACGCTCATCACAATGAGCTTGCTA  
TGATCTCTGAACGCCCTCGATGAGCAAGACACGAACTACAACAGCTTTCGTCAACACAGGATCACAACCT  
ACCTCGACAAGTTCAGCGACTAGAAACGGACAAAAAGCTTTGGCAAAAACACTGGCGATTC TTTTCGCAA  
TCCGTCCAAGATATTCGGTCTTCTGTACAAAATAAATTAACAAGAAATCCAACAAGAACAAAAAAATTAG  
CACAAAATTTGCGAGCGCTTCGTAACTCTTTACAAGCTCTCGTTGATGGCTCTTCTCCAGAAAATATAT  
TGATTTTCTAGCTGGTGAAACCCCGGAACATATTC ATATTGTTAAACAAGGAGAGACCCCTGAGCAAGATC  
GC GAGTAAATATAACATCC CCGTCGTAGAAT TAAAAAACTTAATAAACTAAATTCGGATACTATTTTTTA  
CAGATCAAA GAATTC GCCTTCCGAAAAAGAAATAGCTGCTCTTTTCTAGATAATAAACAAAGTCTGCTGT  
AGGATCCCAATTAAGGAAC TAACTAGCATGTGGATGAAATTTACTGTTGCAGTGTTTGGCGAAGCAGA  
GGAGGGAAGCTTTGAGTCCGCATACCTCTGCTCTTCACTAACAGATCTACATAACAACCTTGGTCATGGA  
CGAGACTCGCCCTCAGGTATTTGCTTGTGTGCAAGCTATTATGCAGGGATACGACATACTATTC TTTA  
GAGTCAAGGAAGAAGGCTTCTTTATTGATAGCTATTTCTTTGGCCTTCATTTCTTAAATACTCAGACTTC  
ACTAACTAATATCGTCGCCTTAGCATTTGCCTGGTGTCCGAGACTTCAACATTATTGAAGCCTCGCTGGCT  
CTCTGCAGAAAATTA AAAAGCCTTCTCTCTTTTTCAGATCAAGATCTGTACGACTTTCTTACTTTCAAAG  
ATGCTTAATCCATCGTCTGGAAGTATTC TTTTAAATCCCTCTTCAGAAGGCACCATTC CACGCTCTCCAGA  
ACGCCAGTTAGCTGGACAAACCATTC CGTGGTCTCAAAGAAGATCAAT GAATCTAAAATACGCAATTC  
TCGTCAATGGAACGCCCTAAAGGAAGATCATTGATAACCGCATGAC GAATAACCCCATGTTTATCGATAA  
GGAAAGTAGCTCTTAAAGCGAGCGATCC TTCA GGATTC AAAACACCAAAAAGCTTCTGATATTTTAAAGA  
GGGTCTGCTAACAGAGGATATTC TGTTCCCTCTATCCCTCCTGCATCTCTCGCTACAGTGAGCCAACGA  
GAATGTGTCTCAATGTCGTCAACGGAGCAACCAAGGACGACTGCACCATGCTCTTCAAATCTACCAATC  
TATCTTGA AAAGCATGTAATTC TGTAGGACAAACATAGGTA AAAATCTTTAGGATAAAAGAAGAGCACTAC  
ATACTTACCACGAAAGTCTGCTAGAGAGATTTCTTCTCTTCTCCACAACAACGGCTTTACCAGAAAAA  
TCCGGAGCCTGTCTTCCA ACTAATGATCCCATAGTACTCCTCCTAGAAAGAAACAACGCACCAGAGAGGA  
TTTGAACCTCTGACCACCTGGTTTCGTAGCCAGGTACTCTATCCACTGAGCTACTGGTGCATAGAAA ACTA  
TAGGGCAGAAGGATACCGTGCTTTCGCTAAATGATCAAGAAATTC TCCTCAGAAAAGAAAAAACCCTTCCA  
TTAAA GAATGTTTTAACAGAAA ACTATTGTTATTC TTCA GAATTTTCTCTCTCAACATCGGCTCCTGTG  
AAGCTATAAAGAGCGCAGATGTTAACAACAGACCAGTCGTCCCACTGCATGACTTAAAGCATGCTGAAT  
ACAAGAGGCTCCATCACAAATCCCTTGCGAAACAATATCTTCCACAAATCCAGAACTCCGTTAAATCCCT  
ACTCGCCAGTCCGCTTGAGAGAAGACTTCAGAGAATACTTCTTCTCCACTCTTCCGCTACGGGT AACGA  
TGGCACGAAAAGGCTTCTCTGCGGCACTAAGCACAGCAAGAAAACCAAACGCTCACTAGGAGAAAAGAGC  
AAGCGGAACAGAAATTTCTCTTGGCGCTC GAATGAATGCGCACCCACCTCCAGGCAAGCATCC TGATCGT  
AAAGATTC TGTCATGGCTCGTATAGAAGAGGTGATATAACCTATCTCCTCCTGAG GAATACAGTCTGCAG  
CAATATGAATACATACTTCGCTGAAGAAAGCCTTGCCAATCTCTTCTCAACCTAGCGCTAGCCTCTTC  
TTCTGTGAAAA ACTCAATTTATCC TGTA AAAAAGCACAGTGTCTGCCACTCTGCTTATTGTCTGTT  
TCTCTAGGGACACAAAGACTGGTAGAAGAAACACAAATTCCTGCTACAAAGCCTAATCGATTTGCGATTC

TCTCTTCCTCGCTGTCTTCGAAATCCATTTCTGAGAGCAATGTAGCTCCGGTTAATACCGCAATGTCCTC  
TAAAGATTC CCGGGCGTGCTTCCCAGATACTTTACAGCACAGACAGGGAAAACCC TCTCTATTTGATTC  
ATTTCCAGCATAGCTAATAATTC TTTATCAAAAGCTTCTGCTACAATCACAAGCGGTGTTTTCCCTGCCT  
GAACAAC TGATTGAAGAAATGTTAAAAAGATGGGTTC GAATAATGCAGCGGATGTTCACTCACTAAAAT  
ATAAACCTGGCTATATTC TACCGTTCCTGTTTCCGCATGCGTAATAAAGTAAGGAGAAGCATATCC AAAA  
TCC CACACAGCATGCTCTTCGGCATGCCAGTATGTTTCAGATTC TTCATGTTCTTCTACGATATAGTAAC  
CGTTCCTCCCTCCATAACCC ACTGCGCTAGATAAAAACAGAAGCGATTTTCGCTATTAAAACGTCGCGCGAT  
ACTGGATACATACACTGTATGTTCCAGATCGCTTAGAGGAAATGTTTCTCTATAAAAAACCTCTTGGATT  
TTCTTTTCTGCAAGAAGCATTC CCGGATGGATTTTCATGAGGATCC AAACCTTTCTGGATACCTGTCATGC  
CCTCCGCTAATAACGCTTCTATTAGTAAAGCTGTGGTTTTTGGCCCATCTCCGAATCGCATACGAGTTC  
CAAGGCAGTATCTCGGATGAGTTTCATACCTATATTTTCAAAGACATCCGGAAAACA GAATATCC TTCAGC  
ATACTCTGACTATCTTGCCTTGTCCGCGTATCC TGGACATTGTGAACAATCGTGCTAAACCCATAAGGAC  
CGATTGTCTGAGAAAACATATGAGATATTACACGCGCGCGCGTAAGACTGCCTGTAAACCTTGTCTTG  
GTCTCGAAAAC TATTAGACAAAACCC TATTCCTCTATCAGCTGCAGTCTTGGATATAGAAAGGCGATTTAT  
TC TTGTCAAACAACCATCTTTGGATATCTATCAAGCATATTC TGGGAGAAGGAAAGGTTGTGCTGTTCT  
ATAAATGTTTTTCTACCTTCCGCACACATAGTTCGTAACGGCCATGTGATATACTTTTTGTGTAACAGA  
CATTC AAAAATTC GAATGCCCTAATAAATTTTGAAT TGCCTTACGTCGAGGCAC TAACCGATCTAATAA  
TAAGAAGGCTTGCTCTACCTCTTTA GGGTATAAAGTTTTCAAACCTCCAAAATCACACTTTGTGTTTTCC  
ATAGGAAGAAATTGTTTAGGATCTTGAAGTACGACCAA ACTC CAGAACACATTTCCATTTTAAATTTCC  
CAAAAAACGGCTCATAATAAAAAGGAAGAAAATGGACGCCTGGTAGCCGCGCTTTATTTAACTCCTGAGC  
GACCTTAC ACCCATCCATCCAGGGAGCCCC TAAAAC TTTAAAGGGAAGCGTATAGCCTATCCCTATGTTT  
GTGACAGATAAAGCTCCTATAATACCTGTTGTAGCGTAAAAATATGCAGACTGCGCATCTGGAATCTGAG  
GACTGTAGGAACCC AAATCAATCC TGTATCAGCAAAAATCATGGAGCGCTTCC ACCCTCGCATAGGGAC  
AACTGTCACCGAGGCATTGGGTGCATATCGAGCTCGATAACAATAAAGCTAGTTCACCTGGTGTCATCCCA  
TAGCAATAGGGGATCGCAGGGAAAGCCTCTTTATCAGGGAGAGGGCCATCGACAAGATTCCTCCCATAG  
GAT TGGGACGATCCAGAACAATTAATTCCTTCTTGCTGCTCGCAGATGCTTTTACGACTTGCAACAATGC  
AGAAATGAATGAATAGGACCGCACACCAATATCTTGTACATCGTACACAAAAACATCGCAGGCCCTCAATG  
ACTTCAGCAGGAATCTCTTTAGAAGCAAATAGAGAAAATGACTGGATATCTTCTAAGATAGGATCATATC  
CTGGTGTCTCAGCAATGGATGCCCCAAAATACCC ATGTTCTAGTGTGCATAAAGCACTGAGCTTACAAC  
CCCTTTATGCTTGTTAAAAACACAAAAGCAATGTTCCCTTGTGCTGATTAATGGCTGCACTATGAGAAATC  
AATGCAACCCGCTTGCCACGTATTTTCTCAAGATATTTTCTTCTTGAACACGCGTTCCAAGCCTACCT  
GTACAAGAGCATAGCTCACATTAGGAAATAGTAGCGCAA GGATCACTAGCTTACAGATTGTTTTTATAAT  
CTCCTTTGGATCTCTCTTTGACAAGGGAAACCTTATCTTCTGATTTTTTGTGTTTTTGTATCTACAGCAAC  
CC TGTGAAACTTCTTAAAATAAAAAAGCTTAGTGAAAGAAAATTC TTATCGCCGCTATCATCC TGCC  
ATACTCTCTATACAGAGGTGCTGTTCTTTTTTTGTCATCC AAAGGGATTTTATGAAAATTC TTATAGCC  
AGTTCATGGATATAAGGTGCGCGAAACCAAAGCTTTTCTAAAAAACTAGGAGAGTTTGATATCTTCT  
CGCTGTAGACTACCCATCTACCAACCC CTAAGGAAACTGGCGAAACCC CAGAAGAAAATGCTATTC A  
GAAAGGCTTATTTGCAGCTCAAACCTTTCGTTGTTGGACTATTGCTGATGATTC TATGCTTATCATTC A  
GCTTTAGGTGGACTCCAGGAAAATATCCGCTTCTTTTGTGCTGGAGAACAGGCAAACGATAAAGATCATC  
GCAAAAAACTTCTTGAGAACATGCGTCTTTTAGAAAATACAATCGATCGATCGGCTTATTTTGAATGCTG  
CGTCGCTTAAATTTCTCTTTTGGAAAGATCTTCAAAGCTCACGCCCTTTCGGAAGGAACTATTGCGTTT  
GAGGAACGCGGTTCCCTCAGGGTTTGGATATGATCC TTTGTTTGTAAAACATGACTACAAGCAAAC TTATG  
CCGAAT TACCAGAGGCAATTA AAAACCAAGTTTCTCACAGAGCAAAGCATTAGTCAAATTACAGCCCTA  
TGTGAAACGGTTCTCGCAAATCACTTACTCGCGGGAAAGAGAGTCTCTAAAGACCTCTCTAAACTAGA  
ACGGATTTCTTGATCTCTGTAA GAATCTGCTCCGCTCTCGCGAAATCCGCTTCGAGCTTTGCATTGACC  
AAAGCTCCCTCTTGAAGATTTTGTGTTGCTAAAGGCATCTCTATACTCACTGC GGATTTTCGAGTTAAGC  
GATGCGTAGGGCTGAAAGAACACGTC GAATCCCGTCGATCATTC TATCTTCCAATTAATCATCGTCTTT  
CCCTGTTTTTTAAGCAGATAATTAATTTTTGAAAAGTGGCAAC ACCCAAAGAACCTCTATGTGCAGCCA  
ATGGAGACGGATGCGGGCAAGCAAGAACC GCATGTTGATGCTTAGTCTGGAAAAGCAGATTACATTTTTG  
CCGCGCAGCATTC CCCATAAAAACAAAGATTACGTGCGTTCTATTTTGAATCAATTTAGTTACAATAGCA  
TCGGTAAAACGTTCCCATCC TCGTCCGTCATGAGAGAAGGCTTCCCTGCGCGAACCGTAAGCACGGTGT  
TCAAAAAGAAGAACCTTGATCTGCCAGGCTTGCAAAC ACCCAGATTCATTAC GAATCCCTAAATCGGT  
ATG GAGTTCCTGAAAAATATTACGCAAAGATGGAGGTAATGCCTGCCCTCTAGGAACACTAAA ACTCAA

CCATGCGCCTGCCCTTCTCCATGATACGGATCTTGTCCAAGAATCACTACCCGCACTTGATCGAAAGGAG  
TACTCGCAAAGCAGCAAAAATATTTTCTTTTTTA GGGTAGATCTTTGCTTGTGCGTATTC ACTTTTTTAA  
AAAAGCAAGCAACTGGGACCAATAAGGCTGAGACCATTCATCTTTAAGCTGTTCTTGCCAAGACGGGGG  
AGT TGCCTCTATAGTAAAAGCCTCGTGCATACACTC TCCTTAATCTAATGCATAGAGTATATGCATTC TCG  
AAAATTTTCTTCGA ACCCGAAAATATATATTACATACATATGCTTACATCCGAAT TAAATGCAGCACAAG  
TTACCGCCGTCACGGCGCCACTACAACCAGTCTGGTCTTAGCTGGAGCTGGAGCTGGGAAA ACTCGAGT  
AGTCACTCATCGAATFCTTCATTTAATAGAA GAATFCCCGGCTCGATCC TAAACAAATTTTAGCTATTACG  
TTCACGAACAAAGCAGCTAACGAACTAAAAGAACGTATCCAATCGCAATGTCGTGAGCTAGGATATTCAG  
ACGTACCTATGGTAAGCACATTC CATAGTCTTAGCGTTTATATCC TCGCAGCTCTATTC ATTTGTTAGA  
TAGACAGTCAAT TTTGTTATTTATGATCAGAGT GATTC TGA AAAAATTAATTAAGCAATGCTTACGCAAG  
CTGAACCTCGATAAAAAGCTTTGCAATGCAATGCAATTTACTATCTCTCAAGCAAAAATCGCTTGCAGA  
GTCTGAAGATCTCGATTC CAAA GAATATCCAG ACCCTACTCGCACC GTTTATGCTGAATACCAAGAACA  
GTTACGTGCTGCGAACGCTCTAGATTTTCGATGATCTGTTATTC CTAACAGAAAACTGCTGCGCATACT  
GAAGTCCAGCAA GAATACGCTAATCATTGAAAGCCTTGTGATAGATGAGTATCAAGACACCAACCACG  
CGCAATATCTCATTGCCAAACGCTTGTGCTGCAGCTCATAACAATATCTTTGTGCTTGGAGATCCCGACCA  
ATCTATATATTC TTGGAGAGGCGCCAACATCTCTAATATCTTAAACTTTGAGCAAGATTATTC GCAGGCT  
TTAGTTGTTTCGCTTAGAAGAAAACTATCGTTCTTGTGGGACCATCC TAGAAGCCGCTAATGCTCTGATTC  
AAAATAATTC TGCACGCTTAGAAAAACATTGCGTAGTGTAAAAGGGCCTGGAGATAAAAATTTTCTGTTT  
TACAGGAAAAATGACCGCGATGAGGCAGAGCAAGTCTTAGAAGAAATCTCTAATCTTCATTC CTATAAA  
GATATCCCTCTCTTGACATTTGTATTTTATATCGAACGAACCTTCAGTCTCAATCGTTTCGAAGCGGCGC  
TTCTTAAGCGAGGTTATCCCTATGAAATTATAGGTGGCATTTCCTTCTACAAGCGTAGAGAAATCC AAGA  
TATTC TTGCTTTCTTCGCTTATTTTCTAATAACTACGACATGGCAGCCTTTGAGCGAACCATTAGCCTG  
AAAAAATGCGGTATTGGAGCTACCACATTAGCCGCTCTTATGAACTATGCCAAAAATAACAGACCTACCTA  
TATTGCAGGCTTGTGGGACGTATTAGAGAAAAATCTATCC GTTTAACTAAAAACAACAGCAAGGGCT  
TTTCTCTTATTTGACTCATTTCCATCAATGGAGCAGCTATACGGAACTGCGATCTTCATGAATTCATC  
AATGAAACGATCCGCATCACGGAT TACCTCTCCATCC TCAAAGAAGATCC TGAACCTATGAAGATAGAA  
AAAACAACCTTAGAGCAATTATTAGCAGAAACGCAAATATGGGGTAAAAGCAGTGAAAACCTTGCTGGTTT  
CCTAGAAGATCTAGCTCTAAAAGTTCCGCGAGATGAAACAGCAAGTTCCCATGATCGCCTCAAGCTCATG  
ACGATCCATAACAGTAAA GGGT TAGAGT TTTCTGTAGTCTTTCTGTTAGGTCTTGAAGAAAACCTTCTTC  
CTCATGCCA ACTCGAAAGGTATGCATGAAAATATTGAAGAGGAACGGAGATTGTGTTACGTGG GAAT TAC  
CCGAGCACAAGAGTATCTCTATTTATCTCGAGCAAAA ACCGATTCCTTTGGGGAACGGAACGCACCATG  
GTCCCAGCAGATTTATTAGCGAGCTTCCGAGGGCTCTTTTAAAATTTGTTTAACTATGTTGCATCAGC  
ATCAAACAGCATCTGTAGCTCTTTGCTCCTTACATCTTCAACAGGGACTGGATATGCTACAGATGCC  
AGTTGCTGA ACTCGCAACATTTGTGTCCAGCAAATCACTATCAATCC CTGTTTGTATCTCGATAGCTTA  
GATTC TCCTCCAGAATCTTTTTTCGTTTTTCCCTATTAGCGAACAGCATCC TTTTACAGAACTCTATCCG  
CATACCTTCTTCGGCAAATTGATACCAATTTGCTCTCTCAGGAACGTACTATAGCTCAGTATATTGT  
AGGCAACCTCTCCCAGAAGG ACTCTTTTTTAGAAA ATCC TAGTCTTGTGGCTGCAGATTTAAACGTCTCC  
GAACACCTTTTCCACAAGGTATGGCAACGTATCC AACAAATTACATCC TTTTAGGAGT CGGAGCGCCTTCCC  
TACAGTCTACT GGGTATCGCTACTACAGACATCTCCCATAAGGAGGCTTTAGCTATTATTC GCAACCA  
TTTCCC TAGATTAGCTCGTTGTGATTTCACTACTATCGTAGGAAAATGCATGCAACCACAACAGAGATT  
CTTACATTTCTTAGACACGCTTTTGTTCATCC CTGTTGTTCCAGCAGCAGGCTTTTCCGAGACACTGC  
ACCC CCCTGCTCCAGCGCTTCTGATGCCTACCTTTCCTTCTCGGAA ACTCTTCTTG GGATGTCTCTAT  
TAATAAAGATTGTCTCCCCTCTATTAG ACTCAACGACACCGTACTAGATATCTATCC TTCTCTTCCCTCGT  
GAAGAGAAAGACCACCTATCGCAACAAATCC GAGCAGCAAAAACAAATGCTTCGCAATGTAAAAAACGAG  
AAGAAACGTTATTGGCTATCC TTC GAGT TCTCATCC CTTACCAAGAA GAGTTCCTTCTAAAAAACGCAC  
CTCTCCTAAAGCTTTTCTGTAAAAACAAATAGCTCGGAACTCTCTCTCATGAAGCTACCGTTTGTCTG  
GCCATTGATAATAAAACGTTAGCA ACCCTGTTGGAT ACTCCCTATGCGATCGCTATTTCCACAAGCGG  
TTGGATCC TGCCCCGATCAATCTAAAGCAACTATTTGCAATTGGATCC ACCAGTGGATTTCTACAGAAAA  
ACATCC TCTATCTGATGCAGCTATTAGCCAAAAAATATTGAGAAGGGCATCC CTGCGCACGACGCACA  
GTAGCCAAATATCGTTTCGCAACT GAATATCC CCCCCTGCGCACCAACGCAACACCTATGCTCTGTTTTAA  
CAACAACACGCACAGA GAATTC TCGACATACTATCTAATCGGAT ATGTAAAGCTGCTTTACATCC CTTGA  
ACTAGAAATAAAATGGAATAAAAAAGCCAGAACAAAGAGAAGTTGTTCTGGGCTGACAGAAGCTGTCAGA  
TCATTTTAATAAGATTGATGACAACACTACAACAAGTTTCGT GGATCC AAAAA GAATCTAAAAAGCCATACA

AAGATTGCGTTACTTCTTGCATGCTTCTAACACTTTATCAGCGTCATCTTTGAGAAGCATCTCAATGAG  
CGCTTTTTCTTCTCTAGCATGCCGCACATCCGCTTCTTTCATGTTCTGTGAAATATGCATAGTCTTCAGGA  
TTGGAAAATCCAAAGTACTCAGTCAATCCACGAATTTTCTCTCTAGCGATACGTGGAATTTGACTC  
TCAT  
AAGAATACAAAGCAGCCACTCCTGCAGCTAAAGAATCTCCTGTACACCACCGCATGAAAGTAGCTACTTT  
CGCTTTGCTGCTTCACTAGGCTCATGAGCCTCTAACTCTTCTGAGTAACTCCTAGAGCAAACACAAAC  
TGCTTCCACAAATCAATATGATTAAGGTAAACCGTCTCTTCCATCCATCAAGTTATCTAACAATAACTTAC  
GCGCCTCTAAATCATCGCAACGACTATGAATCGCAGATAAATATTTAGGAAAGGCTTTGATATGTAATA  
ATAGTCTTTGGCATAAGCCTGTAATGCTCTTTAGTAAGCTCCCCCTTCGACCATTTACATAAAAACGTG  
TGTTCTAGCATATGCTTATTTTGAATAATTAATCTAAGTATCTAAAAAATTCATAAACACCTCCATCA  
TTTTCTTTCTTGACTCACGTAACCGCTTGCAAAAAAGGTCCGTATAAGTCTCTGTTTCATCTATGCGC  
AAAGAACAATACTCTTCTCGAGAAGTAGGATATGAATGGTAGACCATATTAGGTGCCTGCTCTATCACCG  
CTAACGGTGTGTTGCTCATTCCTCTCCATACAAACAACAGCCGCAACTGCTAAGGCATCTACAAGATT  
ACTTTGCGTCATCTGTAAGGGACGACCGAAACAATCTAGCGATCCATATATAGTTGTGTAATGGAGAAAAT  
CCATAACCAACACAGCCCGATACCCAGTACTCCACGCGCATTTGAGTAGTATGGCTATCTGTAATGATTA  
CGCTAGCTCTTTCACTCGAAAATAATTTCTTAAACATTCCTCCGATGCGATTACAGGATCCCAAATATC  
TTTAGGATATAAAAACAAAAGGCTGGTCCGATTCGATTCATCAATCCCTGCAGAAGGAATCAAATACT  
TCTTTTTTTCGTTAGATATATCCCGCTTTTTCTCACAAAACAAATAAGCATCCGCTTCTTTTTTTTATCAACT  
CTGCTTTGCACATTCCTGTCATCAGCGACAGCGCCTTACATAAACTCACAACTTTGAAGAGACAACCTAC  
CACACTCCGTTCTTGCAGAGGCGGCAAAGCCTCTTGCAAGATCTCTTGAAGCGAATCATGTGCAAATACT  
TTACGTGTTTTGATCGGAGTTATTTTTCATAATAATAATACTGAAATCCCTCTGTATTACAAATACATTC  
TTCTTCCATCCGATAATCGCGTGATAGGGAAGAAAGTATCGCCCCAATATTTCTTTTTTATGATATGTGTGA  
CAAACAAGCTTTTCAGAAGGTTTTGTTGGAAAAAACTTTCAAAGAGCTCCGCTCCCCAATTAAAAACGG  
ATGATTCAAAGATAGTGTCCCATACTCTGCAAAGGAAGAACTCTATGCATTGTGGTGGATGCATCCCTG  
CGAGAAAAGACAACGATATCCCGCCCATGCTTATACTTGTCTGGAAGAGACTCCAAGTCTTTTCGTTCCCA  
TAATGATGGGATGATTTTGAATGGTTTCTGCAAAAAACGTAGATCTTCGGGATAACTCCAAGGGAGCTT  
GCCTAAAGCTCCCATCACTCTCTGGATCAATAGCAACGATACCTGTTGCTTGGATCATACAAACATAC  
CAGCCCAAGCAGCAGCGGCTAAGGCACGTCTGTTACCTTCAACCTGATGCACACGTAGATAATCAACTCC  
TCGATCATGAAGAGATACAGAACAGCCGATCGTTTCCCAATCACGATCGTCACTATTAATCGGCCAAC  
ATACTCAAACACGATTTTCTAGAATGGCTATTAATACAGGACACTCTAAAACACGTTTAAACTGCTTTA  
CTCCATCCATCAATAACATCGACTGAACGGGAGTCTTCCCAAATCCATTCCTGGATCGAAAACAACCTTG  
CCAACCTTGTATCTAAACCTACTTGAGCAAATTGTTCTAAGTACTGAGACTCTCCCCAACGCAACATTTGCTCA  
ATAGGAGATTCCTCATAAGAAAGTACACAATCTGGTCTTGGAGGCAGCGAACACGAATGATTTATTAATA  
GCCGTAGCCCAAACCTCTCGCCAAATGAGCCATTTCCAAAGAGCCTCCAGAAACATCATTGATCCAACG  
AATCGGAAATACTTCAACAGCTCGTGAATAATCTCTGGACGAAATGTATCGATAGATACATCAGGGCAT  
TGTTGAGCAGCCCCCACCCTCCGCTAATAAACGCAAAACAGGTTCTAGACGCTCCACTCTGTTCTA  
CGCTTCTAAATCTTTTACACGAGGATGGTTGCTTGGCCCCCTAAATCAATAATAGAAGCTCCTTCTGC  
AAAAGTCTCTCAGCATGGGCTGCGGCTCTGCTCGCCTCCAGAAACAATCCGATCGGAGATCGAGTTA  
TCCGTAATATTAACAATACCCATAATTTGGGTAGCAGAACCAGAACTGCCTAACGCATCCCTCTGTCA  
ATGGATAAATAGCAGCAAGCTCTGCAAACGTTTTCCATTACAAGAAGATCCCTCCAACGGAAACGACG  
ATACGGACATAAAGAAGCCATCATAGAAAAGAAAGGTCTTTCTAATACCTTAGGATGTGGGATGTA  
CATTTGTCACTATGATAAGAAAAAGCTTTCGTCTCCATAGAAAAGCACATCAATATCAATCGGTGAGGCC  
CCCATTTTTAAGAAGCATCTTGTCCAAAACGACTTCTATCATCTTGATTTCTTCAATCAACTCGTCTGG  
AGATAGCTGCGTTTCCCAATAACTACAAGTTAAAATAAGGAAGATCCATTCCTTTCGGAGCCCTTCT  
AACAAACAAGCCTTCGTCTCTAAAATCACAGAACTTTTTAAATTTGGATCCAGCCTTCTTTAAACTTG  
CATAAGCGGTCTTATATGCTCATGCCGTTACCTAAATTTGGAACCCAACTTAAACAACAAAATTC  
ACTAGTCATGGCACCTCTCTACTTATGCTGAAACTTACAGGACTGAGTAGATCTGGATCGGAGGACGCT  
CTTTACTTACTCGCAAGTCAATCCTAGAACTTGTCCAGCCAAAGCCTTTTCTATTTTTTCCAGCAAAC  
CTTAGCTAAACGTTCAATTAAGCACAAAGGATATTCCTTGTCAACTTCTTCAATAAGAGAAACAAGCTCT  
GCATAACACACGCTATCAGAGACTTTGTCCGTGGAACAAGCCTTTGGCTCTTCTTTAAAAAAAAGAGATA  
AAGAAACAAGAACGGGCTGCGGATATGCCGTTCTTGTCTGAGACTCTATAGATACCCAAACGCGAAA  
ATCCGCTATATCTAAACGATACAACAACACTCTTGTAGGCAGCAAGACTAATTTTTTATAACTTTTAAATC  
TTACCGAACCAATTTTTTCTTCTTCCAATAGATCTAGGAACGCTCGCAACTGTTTGGAAAGGATAGGAT  
GACGCATCTTTGTAAGCTTTAGCTTCAATTTGGCAATCCGCTCTCGTGTACATTGAATGCAGAACC

CACCTCTTCCAAAGTCTTGGGACGACCATCAAGAAGACCAAACCGATGAATCAAAACAAAACGCTCACGG  
TCCGTAAGCGTTTTCAAACCTTCTTTCATTTTATCTTTTAAACATGGAATACCCGTGTGCCTCCGCTGGAG  
ATTC AACAGCAGTATCTTCCAAGAAATCTCCAAAAGAGCTCTCCCACCATCTCCGACCTCTGCCTGCAA  
AGAAATCGGGTGTGAGCTATTTTATAGATTTCTCGAACACGATCTGGAGTAAAGCCCAATTCCTCTCCG  
AGCTCTTCCGGAGTAGGCTCTTCCCTGTTTCCATCATTAATTTTGTAGCTCCACGAAGCACTTTATTGA  
TGGTTTCTATCATGTGAACAGGAATGC GGATCGTTCGTGCTTGATCCGCAATAGCCCGTGTAAACAGCCTG  
ACGAATCCACCACGTGGCATAAGTTGAAAACCTGTATCCCTCTACGATACTCAAACCTTCTCAACAGCCTTC  
ATCAAGCCCATATTACCTTCTTGAATCAGATCC AAGAAAGACAGCCCTCTGTTGGTATATTTTTTCGCGA  
TGGAAATTACCAACCGTAAGTTGGATTCGACCATCTCTTTTTTGGCTTCCTGGCTCTTGTCCATCCAACG  
CTGTAACATCCGCACATCTTTTTTAAACTCTTCAA GAGTGCCTCAGCCGCTACCTCACGCTTGTGAAGC  
TTTTCGCCGCGCCGAGCAAGTTTCGTGCGGCAAACCTTATTTCTCTCAGCTCGCGCTTCAAATCATTGA  
TTTTGCTGTTCTAACTGCAA GAATGAAT CATAAGCCTTAAAAACCACCTCTCCGAAATCTTCCGTCACATT  
ATGACGACAATGGAAACACCGCAAATACGCTTGTGTACGGATACGGCATTCTCCAGCTCGTCAATCAAC  
CTTGCTGATCTGGCTTGGACAACGCCGGATCTTTTAAAGCAAGAAGCCGCTCTTCCAAATATGCATCTT  
CTTCTTTCAATAAAGAGATGAGT TTGGGCAGAAGATTAAGGAAGTGTGTCTTATCTTCTACTTCCTTTTTC  
AGAAACGATCTTATCAAATCGTTCCTTACCATTGATGAGATACTGCGCGATCGACACAGCTTCCTTTTGTA  
GAATAGCGGAAGCGCAAATAATTC TTTCTATTTGAACCTGAGCTTTTTTCTATTCCTTTAGAAATTTCCA  
CCTCTTCCCTCTCTAGTAAGTAGAGGAACGGTTCCATTTCTTCAAATACATACGAACAGGATCATCTGG  
CGTTCCTTTCAGAACGCTTAGCTAACCTTCTAGCTCTTTTTGCTTCCTTTTTTCTTCTTCTGTGCTCT  
ACATCTGCTTGGTTTCAGGACTTGAACATCCATTC CGCCAGAAAAATTA AAACTTGATCGATCTGTTCTG  
GCGTATCGAAAGAAGGAGGAAGAAT TTCATTGATTTCTTCATACGTGATGAACCTTGTATCCCTAGCAAG  
AGTGACTAACTCTTCTAACTTTCTTTGGATTTCTTCTTCTTGAGCTGCCTCGGCAGCTTGACTATCTAGC  
GTATCCATGCGCATGCTGACAAATTA AAACTAAGAAAAATCGGCCTAGAAAGTGACAGTTTATCTTAAG  
AAAAACAAGAAATCTAGGGATTTTAGATAAAAAAAAAGCCTGTTGATCAGATTTAGGCCTAGAAAAACCC  
CTCCCGTCTTTTTCTACTTATCCCTAAATATAGGAAAGATTTGTAAAAAAACTGGCTTTTTGCAGGGTACAA  
AACCCCTAGTATATGTTGAGCAAAGGACCTTATCTAACGTGACTACACAATAATAGAAGGGAGTGCCT  
CCAAAAGCTTTTTGTTTTAATAACAATTTTACCAGAACGTTCTACTCTAGATTCGTTAAAAGATCCCGCT  
CCCATTTGCGCGAATCCCTCAAGAACAACATCGCTCTCTGTTTTAAAAAATCTTCTAAATCCGTATCCCGT  
CCAATCGTTAAACAAAGCATTGGCAAAGGACTCTTTGCGCAAAGGGAGCATAAATAAATAGCATCCCT  
AGATTTTCTTCTCTCAACCCATCGAATAATTGCCGACAAGCTAAGGAGTAGTTATGGGCAGACGGATCTG  
TTCTTGATATACCGCAAAGCTGTCAAAGAATCCGCCGCTCCGTTGCTCTACACGAAAAACAATTTTACG  
AAACTCTAATAACAGCTGAGCCACTACATCTCGAGAAGCTACTGGCTTTCCTGGTAAATTCGTCTTAGCC  
CCCATTTCCAATTGCAATAGATTACGTAGTTCCGACATGAGGCTTGTACTTTTGCTTCCAAATACCAA  
TATAAGCCTGTCTCTTATCCAGCATGCTATGCTGCTCCACAAAGGTTGCTTGATATTCATCATGCAGCTC  
TTGCTGATAAGCAAGCGTTTTCTTTGAGCTCCTGAAGCAATTC TTGATTTTCTAAAATTTTCTCATACGT  
TCACGAACGGCAGCTTCCAACCTGCATTTGTAATTGCTGGTTTTCTCTTTCAATCTTCCGGACA ACTCCT  
CCATATGGTCGTAACGCCCTTTGGCTTGAATAAAGACTTCTCGAGCTTGTCCCAATTGCTCCACCAACTT  
ATCATTTGTGCAATTTTAAACGATCCGTTTCTTTTTGACGCTTTTCAATAGTCTCTCGTATATTTTTTAAT  
CTTTCGTCTTGCTCTGTAAGTTTACGAATCTTTGCTTCAAGGAGCTGCCAGCGGGCAGCAACGCAACGCC  
GCTCTCGCCTCCCAATCGCGAACAACCACCTTAAAGAAGAAACAACAGGGAAGAGAAAGGAACACACCA  
CCATTGCTGCTCGGACAAAAAGGCCA ACTCCTATAGGCAGGA GAATCGCCAAAACGGGTGGGAGGTAA  
TGAAAGTATCGCGAAATACAATAATGATTTTTTTGTTTGGCAGTCTACATTTCTCTAGAACTCTTTCGCT  
TATTCAAAAACCCCTTGTACATACTATTGGTCTTCCCATCACATACTGCATGCCGTCAGTGCATCCCA  
AACTATATCCCTACAAATCGCGAATTTTGGGATGATCATTGTTTTTTTGAATTTTGAATATCAACTGT  
TTTTA GAATCTACTATGATGTTGGCAACTACTGAAACTTCTTTAAAATAGGTCTCTTTCCCCCTTCTTT  
ATTTTATCTATCCCTATTTTTCTTTCTATTTTATTGCTTTTTACCTAAAATCTCCACGTGTTCCGTTCCCG  
GGTTACCTGTAAGGCTGAGCGGATGACATCGTTACTGCCGACACTTCTGTTTTTGTGTGGTCTCTGGA  
GTGACACTTCCAGAGATGACGTAAGTTTCCGGATACAACATCTATCCCTACTCTCATGTCATGCCGAAAGT  
CACAGCAGATCGCTGTGAGGTGTGCGGTTTTGTTCTTTGCGTTAAAGATAACAGTTAAAATAGCCTAATT  
GGGAGAGATTATGGCACCAAGAAAACCGAGCAAGAAAGTCCGACCTCAAAAACGCCCTTCTGCAGAGAAG  
AGAGTTATCACTTCTAAGAAAAAGCAATTACGTAATCAAAGCTTCAAATCAAAGTAAGAACTATATTGA  
AAAAATTTGAATTTGGCAGTGCAATCGGGTGTGTTGAATCCATTTCCGGCAGGGTTGCGTTCCGTTTACAG  
CATCGCAGATAAAGCTGTAAAACGAGGCATCTTTAAGAAAGGTAAAGCTGATCGAGTTAAATCCCGCGCT



TCTGAACGCGCTTGCCCCGAGCTTAATTTTTTCTATTCTTTTCTAATTAATCATCTTAGGTCCAAAAG  
CTGATGAACACGCTCACTTTCTGAGGCTTTTTGGATCGTTTCTGTCAATAAAGATTTTATTTGCATCGA  
TTTAAAAGCGATTTCTTTTTTACAATGTCTTCCCGATATGCCTCCTTTTGAGTCATAAACCTTTGGTTTCA  
CAAGATTTTTTACGCAAAGACCCTTAATTTTTTTGGAGGTTTCCACAATGGCAGCAACGGTACCCATA  
GCAAGCCCAGTGGGCAGACTACTATCTTCCGCAACCGCAACTACTTTGCGAGGCAACGCAACATCCCTTC  
GCTCAAAGCTCAGCTCTGTTAATGATTTGTTTGACCTCATATCCCTCTCCTGCACCTTAGCAAGAGTGAC  
ACCAAGGACCCTGTCTCTGAGACGCAACAACAGCAGCTGTCCACTATAGAGACCACATTGGGCTCAGCT  
AAAAGTGCAAGTAATGCTGTTCAAGCAGGGTGTGGAATGTACAATTACTAACCAGGTGGGTATTCTTCA  
AAACGAATCCTGATGGATCTTTCCACCTAGATCTTGTTCGCAACAAAGAACCCCTCCTGTCTCCACTATC  
ACTTCTCAGCAAAGTAACTCGTTTAGCCAGCAAAGTTCTAGGAACCGTGAAATTCATGGGCTCCCAA  
TTCCCTGTTTACCAGTTGGTGCACACGCAACTGGTATTGGCTTATCTGCTTCTGCGTTTGGAACTGTCA  
GCTCCGCCTTCGATGTCGCAGAAAACCTCAAGAGAAGTTCTCGGGAACCTCAAACA GAATAAACCTACAGA  
AGGAACATCTAAAGAAAACGGCTTCATGGCACGCTTAAAAGAGCTCGTGCAAGTATGTTCAACTTGCTT  
TGCAGCATCTTGGACTTGCTGGCTCAGGCTTTCTGTTTCATCAGCGATGCAGTTTCTACAGCATTATG  
GAGTGCACACCGCTTTTATTGTGGGTATCTTCTGCTTCCCTATCTGCTTTGGGAAAATGTTATTCTTCTAT  
CGCTTTTTAAGGTTTGCAAACACCACATCCCTTGAAGCTCGCAGGTACATATCTGCGAGCTTTTTTTTAA  
TAGAATAAATTTCCGCTGCTAAATGAGACAAAATCCCATTTGAGAATTCGCATAGAGGTAGAACTAACGT  
CCATTCCTGTTGAATGTTCTGTCATTTGGTTTTGCAAGTTTAAATGTTGCGTTTGGCTCTGTGTTAGATA  
TCGTGCTGATCCGTTTGTACTAGCGTATGCATCGGCCCAATCCCTCCTGAAAGACTGGCATTATCAAATC  
CGTTTACTGCATACCTTCTAAACTTGCCAATGTCGAAATCCAACTCTGTAGGTCCAGTTATCTTATATTT  
ATCCCTGTGCTAATGTTATCTTTCTTCTCAACCTCATAATTAAGACTTCTTAACAGAGAGTCTAAA  
GCTAACCTGCTCCAGATAATACGAATAAAAAGATAAATACAGATTGGCTTGCCTGCGCATGCTGTTGCTT  
GTGCATCCGTTACTTTATGCCCTTGCGCTAAAGCTTCCACTCTAGCTAGTAAAGCTTCTCCAAAAACCTC  
GGCGGATAACAGCTATTAATATCCCTAACGATATATTCTGTTTCCCTTAGCTAAAGCCCCATGA  
AAGAAATCCCCACAGAATAAATCTTTTCCCTTCCCTGCTTTCTACAAGATAGGAAGAAAGATTGTAGTAA  
CGGATGAGGTAGAGAAGTTATTAGTAATGGACAGGAGGTGTTAACAGCGTTAGCAGCGACATTGTTGAA  
GTTCACTTCTTGAATCAAAGGATTCAGGAAATTCCTCTGCTTAGGAATTTGTGTATTTAAAATGAGATGG  
ATAAAAAGCAGAACCTAAACTCGTAGAGTCGATCCAGCTATCTACAGCCTGTGCACGTAAAGAAGGTGTAC  
TCCTGTAGAAGTATTAAGAAGCTTTGGCTGGATCTAATGTGTCGTAAGTCTGATTAAGAGTATTGAT  
TTCTGATTGAAACGTATTGAGGTATTCTGAAGCTTTCCCTTGAATTCGTAAGTAGACTTTGTGCTTCT  
CTAACAGCAACAGTAAGATTTATTTTTCTGTAATTACGGTGTGACAAAATTACTAAAATTAGCTCGGC  
AAACATTTGTTGGTACTTGTAAATATAGTTTAAAGTTTCTGTTATCATCAGGCAGCGTAAAAGATTCAA  
AACTTCTCTTTTTTAAGTTTCGTTCCATTTATCTTTGACTTTCTGAGTACAGTATCTTCGCTCACGATC  
GTACTAGCCATCGTACATTCAGCCACTTCGCAATAAGCTGCCATGTAAGATATAACGTGGGCTAATGTTT  
GTGCTGTATGGGCATTGTTAAGTTTAAAAATTTATCCACATATGCGTTATAAGACTAATCCCGGCACT  
ATCTAAAACATCAGTTATCTGCGAGAGTGTATAAGCCCAGCATAACACTCCATAACAGATGTCAAGCGT  
ACAGAAGTAAATTTCTGGTTGTCAATTGAGGCGCTTTACCCCTTCCAGCATACTCTAACCAGTGTG  
CTTGTAAAGAGGATGTCTTTTAACTTCTAACTCTTAAATTTGCTCTTCTACATTAGAACGTACAGATTG  
GAGATTCTGCGTGGCTTGTGAAAGGCTTTAACCACCTCTCCCTTACAGATTCTGCATCTTGCCTGGTC  
AGATAGTAATCCATCACCTCTGGAGGAGGTAAGGCTGCTTGTGTGTAATAGTATTGATATCAGTATCAC  
TTAAATTAGAAGATTGCTTCGCAAAAAGGAATCATTTTCAACACA GAATCAATGACTTCTTTAGATCCACC  
TAAAGCGGGTTCAACCTCCATAGCATTATTGAAAGCTTCCATCCAGCTTGAAGCACTAACTTTGCGTTA  
GCATCGTTTATGTTCTCTTTCGTCAAAGAACTGGAACATCCAGACCTAAATTCAAACACTGGTCCAGCA  
TCTCCTGGATATTTTCTCCTATGCTTGTCTCGATGTTTCCACAAAGCTTCCCTTACATGTGTGTCAAAGTA  
CTCATCAACATAACTTCTCATAATCAGCCAAAGACTTCTCTATGACCTGATCAGAAGCACCTTGAGCT  
GTTAGCTGAGCTGTAACACGATCTTTACCTTCTTGAAGCTCTTTTCTTGTCTTTCTTGTATAACAGTCT  
TGATAGATTCTATCTGAAGGAGCATAAGCACTAGCAAAAACGCTGGCCTGCTCCGTATCATTAAGA GAATC  
CTTCTGCTGATACGACTCATTAATAACTAAATTCGACGATACACCAGCTACTT GAGTCATAGGTACCTCT  
GGCAGTCTTCTATCAGAGCATTCAACTATCTGTAATGGTAGTTACTAATACTTTAGCGGTACTTTGCT  
TAATATCTGCAATAGTACTACCAGAAATAGTACCTGCTGCCGGAGTGTGCTCCTGCGGCTCTTCTTAC  
CCCCAGTCTCCTCCAGGAAATACTCTGTTAGAGGGATTGACCACAGAACCAACTCCAAATATCCAGCT  
TCCAAAGCTACAGCTAAACGCTTAGTACATAAAGTCTT GAGTTTAACTCTCCATATCAATGGCTGGCC  
GTGCTTGGTTTTTAAAATCCGAGCAA GGATTTGGC GAGTTTAAATCTTAAATAAACCTCTCCAGATACAGT

AGTTGGCCTAAAATTTAAATAGTAAGAAGACATAAAAAACAAAACCTAAAACCTTTTATGTTTTTATTTTCT  
TATTTAAAAAGTTTTTTTCTATGTTTGTGTTTTATAAAAAATTTTATGGTAATCTTTTTATAAAAAGACAT  
TAGTTGAGATGTGTTCTATGAACATATTTAATAAAAATTA**ACTC**TGTTTCAAAGATTACACAAAAATAGA  
A**GAAT**TATTTCTTCTACGCATAA**GAAT**AAAACCTTCTGCAT**GAAT**CAAGTAATGCAGTTTCAAAAAACA  
GAAATAGAGCGTAGTGCT**ATTCAGAA**TGTTTTATCTCTTTTAGATTTAGATAATGATGTGAAAGGGAAAT  
ACGAACAGTTAGTTGCTTCCCTATCTTCTAGCGCTCCAACGACCACGTCTCAGCCTCAGAT**GAAT**CAGC  
TGTAATCACATACG**ATCCACCC**TCTTCTA**ATCC**TCTGTATAACGCTTCGAAACAAGCCT**GGGT**ACACAAT  
GTATTGGTTGGCTTCTCTCTGTGCTAAACGAAGCTAAAACAAAAGCTACGGAAATCGCTGGGCAACAAA  
**ATCC**TCCACAAACAGACCTTAAGCCTCTGACAGATTTGTTT**ATT**C**GT**TAACT**ACTC**TAGTAGATAAGGC  
TAATCACAGAGAACTATCTAACGAAGACTTAGAGACATTTTATCTCCTTCCCTGACCAGATCTTTTCTGCT  
**ATTC**AAACTTTCCCGTTGCAAGGAAATCAAAAAGT**ACTC**TTTTCTAATCAATTAT**GGATTC**TTTTGGCG  
AAGATGCTTCTATAGAACAAGTTTTTGCAGACATAC**GAAT**TGAAGGACTTCA**GGATACTCTGAAT**ATGGT  
CCAATCACGACTGTCTGCCACA**GAATTCGAATCC**TTTAAAG**GAAT**TACAGATGATCATAGATA**ACTC**TCCGT  
**GAGT**ATGTTGAACCTTTTAAATGACGAAG**GGAT**TTGATACCATTTTACAGAC**GAGT**AAAGATCTGCTTCCG  
CTATCATCA**ATTC**TCTCTCTCCAGCAACGATAAGATAGA**ACTC**TGCCGTAATATTGCCGACCTTTACAG  
AGACCAAGTGTTATCTATCAAAAACCTTAGATAACGTATT**GAAT**GAGACCATTTATATAAACGCTCGCAAC  
AGCTCTCTGTTCTCAAACATTTGCAGTCTCGTT**GAATTC**ATCATG**GGGAGT**TTCGCTCCTATCGGACTAA  
ATGAGACTACTATAGAGGTAACGAACGCATCAATTGCTGGAGCCCTGCAAGCAGTGCAGGCCATTGAC**AC**  
**TC**GTTTCCATGAAC**TAACTC**CTGAACAGAAAAATCTCGTCAATGAAACGGTCAAGAACTTGATGACTTC  
TCAGGAGGTA**ACT**TACATCGGTGCCGTTTGGGCTTACTTTACGCTGCAACAGTCACTCCTCTAAAG**ACT**  
**C**TGTGACAACAGATGAAGTCAAACAAGCGTTAACCTCGCAAGCTAATACTATCGTCTC**GGAT**TTTTCCCT  
AGCCCAAACGTTAAAATCTACGATTAATAAAATTTGTACAAGAAAACGGG**GAAT**TTAAAGCTAAGTTGAT  
GGTATAGAGAGACAATACTATTTTCGGCCCGCTTAAAACGATACAAGTTCTAACAAAGCC**ACTC**TTA  
**ACCC****AATCC**TTCTTAACTTT**GGAT**CTATA**GGATTC**TTGCCAACATTA**ACT**TTTGGCAGCAAATAACCATGC  
AGAAACTTCTGCTAGAGCCTTTTTTAAATTTAGAGCTCTAGCGCAAGTAGAAAAGTACAAAACCTAGATGGA  
ACTTTACAAGGAAGTGAGAACTTCTTACAGAAAATAAATCAATTACGAAAAGACCTGTTTTCTTACCA**AC**  
**TC**CCTTGCACA**ATCC**TATGAA**ATTC**GCTCTCTCCCTTCTCTTCTGAGTTGCTTCGGTCTTATAGATCG  
CTACATGCCTCAAGAGATTGATTACTTAAACACAGATGAAATC**GGAT**CTGTATTACAGTAACTTCGGCTCT  
AGTGTTGGAAATGCTATGATTGAAGCTATTGCTCA**ATTC**CT**GAAT**GGAGCTACCTACTTCAATTTTGGCA  
GCTTTGTTGGACAACAACCTATGACAGCTATGGCTC**AGGAT**ACCTTCTCTGGCTCTAAAGAGACAGCTGA  
AGCAAA**ACTC**GCTTTAGAAAAACAACAAGCTAA**ACTC**TACCTGCAATATGCT**ACTC**AAGCTCTAAAGGTA  
GTCCAAGAACAGATGGAAC**GAGT**CCAAACGATAAGGTTATCACTAACGAACAGAGATTACGCATCACAG  
ATGCTTTAAAA**GGAT**ACGCAGACAACCTCAACGCCATTAGCGGTTCTTTAGTCTTATTACAGGTGTACCT  
**GAATCC**TCTCAGCGTGG**GAGT**TCGTAATGGCAACCAGAGAGGCAACGATACAGGAACAA**ACCC**TAAAGGA  
ACTTCCACGTGTT**CAGAGG**AAAAGATCAGTGGCAAGCACGTTTAGAA**ATTC**TAGAAGATGCTCTTGTCT  
CAGGACTTCTTCTAATATCATCAGCGGAGGACTGTTCCCTTACAAGCAAGTGTGCAATCTGACCAACA  
AGCCTATGC**GGAT**ATGGGGCAGAACTACCAACTGGAAATGCAATGCATATGACGGCCATGCAGCAA**GAA**  
**TGG**ACGGTAGTAGCCACATCTTTACAA**ATTC**TAAACCAATCTATCTTGGTTTAAACAAGAAAACCTGGCTA  
GTTAGACAAATAAAGCAGCTTAAAAATTTTTGTTTTTAAAGCTGCTTCCCTCACGATTATTACTGAAGCT  
ATCTTAAAGAGATTACGCGCTA**ATCC**CAAATAAATTTGATTTAATAGCTGAAGAGATGTTGCTACCACC**AT**  
**CCACTC**CTGTTGCATAGAAGTGAGATGCATTTGCA**ACTC**TAACTGAAA**ATTC**TGTCCCATATCAGCATAG  
GCCTGCTG**ATTCGAGT**GTACCAGAGCTTGCATTTGGAAC**ATTC**CAATATTAGTTGGGCTACCGACTTCTC  
**CGGAT**ACCACAGT**ATCC**TCTAAAGTCTGTA AAAACTAATCTCCAGTTCTTTCCGTTTTCTCCTGGTTTACC  
ATTTTTAACCTCAAAAACACC**ATCC**ACACCTTCAACAGT**ACTC**ACTGATAAAGGGGCAATT**GAGT**TTTC  
AATGATGTTAAA**GAAT**TGTTGATTGCGTTAAGCATATCGGTATACTGTGTCA**ACTC**TGCATTAATTTTTG  
CTTTCTGCTCTGTAGATAACTTGTATCATCAGTAACCGCACTTTGTTGATTAGTGACGGTAGCTTAGC  
TGCTTTCGTAATTTCTAGAAACACATCTACTTGTTCCTTTCTTCTGCTAACTTGGCTTTAGCATTATCT  
GCAG**ACCC**TGCAAAAAT**ATTC**TCCCTGTTTTTACCTACAACAGGAGGTTGCCCAATATAGTTAGCAAAAC  
CAAAGTAGGTTGCG**GAGT**TTACATACAACTAATCGCATCTAAAATGGTGTGCTAT**ATCC**GAACCTTT  
ATTTCCGTAATACAGACGAGACGAGATCTTTTCTAAAA**ACTC**CACTTCTTTGGCATGTAGTGGTCAATC  
AATACAGAAGCAACGGCAGAAAGGGAGCGGAGAAGCCTTACTTCTTAGTTTGTGCAATAGTTTTCCAG  
**CATTC****ACTC**TGTCTGCATCTTGGTCA**GAAT**AG**ACTC**TTCTGTTCCCTTGAACCATACGTTTTGT**GAAT**  
CAT**ATTC**TTCTCT**GAAT**CAGCTTGCA**GAATGAAT**CGATCG**ACTC**TTGCTTAAATACCTCTGCTTGAGAA

AGCGCTACTGCTAACATCGTTCCTAGCACTTTATGAAATCCATCGCCTAGAGCGATCTCATCACATAACCG  
CTTCTCCTGAATCATTATAGGAAAATACTCGTATCGATCCCGTTTGCTAATGTGACAAAGCCTTGTA  
AGAACAACCTGCAAAATGTCTTGCATTTTGGCCGTCAAACAAAGTTATTACTCAAACCACTTAACGTT  
TCTGAAAAGCTTTCTTCTAAACCTTCTAAGAGACCTGTTTTCTTTATTCGGCAATTAACAACAACCAAT  
GCGCACAGAGAATCTCTAAAAATTCGTCTAACTGCTGTTGTTGCAACGATGATACCGCAGCATTCACCAT  
TTGCTGCTGCTCAGCTGTTAAAAAGTCAAACGTAAACCTATTGCACGCACAGTGGGAAGAACACTTACC  
ATCATGGCAGGGTCAGTAAAATACGCTCCTCTTCACTAGTAGGAGACAATGAGTGCATAAGAGAGGATA  
CTAAAGAAATCACCTGCACGAAGTAACCATGTTGCCTAGAATTCACAAATAGAGCATCTTGTTGAGACT  
ATGATACGCTTGTAACCGCATCCACTTGTCTTGGTACATAGCTGCTATTCGTTGACAGAGATCCACCTTC  
TGACTTGCCTTACAGTCACTCACGATCTTAGCAGAAAGATACCCACCGACTCGAGCAATCGCCTCTA  
TATGTTCTGGACTGAGATGAGATTCACTCGTGGCTGTATAGAGGAAATTTCTTCCGAGACTTCTTGAA  
TACCCGAAACTTCTTCTGTCAAACGCTCTTTAATCACAGATAAAATCGCTTGGAAAGTTCTCCAATCGT  
ACCTGGGCGAAGGACTGCTCTAAATTCCTTCCGTACCAAAAATATCTATCAAAGATTGGATCAATTCCTA  
GCTGCCGCGTGTAGATACAGAAGCTTTCTGCAAACTCGCATAACATCATTCGAAAGAGAAAGAAGAGA  
ACGAATATCTTCCGCAGACAAACGCTCTTGCTTGTCCGTAGGGAAGCGGCATCCATACGGATAGCAAGT  
AAATCTCCCCGTTCTTCTTCCGTAAACAAGGATGTGTCCACTAAGAGTTGATCCAAAATTTTACGAATAC  
CTTGCCTAATCGTACTGCCCAACTTTGTTTTAATGCCTGTAAAAATAGGCATGCTAGAATCAGACTGAAC  
TACAGCTTGTGCAACAACCTGATTTTTCAGATTGCAGGGAAGCCATCGTTTTTTCTTGGATGTGTGGGCTC  
TCTATAGAGCGTCTGTTTGTCTATCTACATCCAACTGTTCCAGTCGTTGAATCAAATTTTCGATATCGCT  
GGTCTGCTTTTTGATCGAAGGAAAACAAGAAGAGCTTTTAAAGCTTCTTGTTCCATTTTGAAGTCTCATA  
TTGAGCAACCTGAGATACTATTGTTGCAAGAGTCTGGTTTGGCAATCTTCTTTGCAATAGCCTCAAAGAGTG  
CTATTATAATCCGTTAAAGATCCTTGTGTACGATGAATACGGTTCATTGCCAACTCTCTCAACTCTACAG  
TTGTACTTGTGCGGAACCTATCCCAATAATATTTTTTTTACAACCTTCTCCAGAAGAATAAAAAGCAT  
ATTTCTTCTTTTTGAACTAAGAATTTATTATTGAAAAGACTTCTGTAGACACGAGATTCCTTTGAAAAG  
AAAAAGAGCCAAAAAGAAATTCTTTTTTGGCTCCCCCTCAATTCACAACTTCAATCACACGTTAAGA  
AAGATAACCAGAGAATAGAGAAGCAATGTTTACCAACACCTGTTGAATGAAAGCGGGCTGTTTTCTAAAC  
GCATTCCTTTGAGATTCGCGAGACTACGTTCCCATCAACAAACTCTCTTTCCAATTTGTGCAGCAAACT  
TCTGCAAGCTATCCACAGAATTCGTAACAGCAGGATACCCAAATTTGTGGAGCTTTGCTAATAGATGCCGT  
GAGCTTCTGCATAATCTCTTCTTGATTTGCTTGCAGGATGCTCACAACTCGTAGACATCAAAGAATCCAGA  
ACCTGTAAGCGGCTATATAACATCACCTAACGTTTGGCTATCTCTGACAATAGTTTCTGCTGCTCTTTGGC  
TAGCATCTGCAGTGCCTTCTGACTTTCTATGCCAGAACGAGAAACGCTTCTGGAAAGCGCGGATTTGC  
AGTTGACTAATAGCTGACTGCACGCCGCTTCTGCTTTTGGAAATAAAAAGAGTTCAGTGTTTTGTAAAGCA  
GAATATCCATCGGAAAGTGTGCTGCATAAGAGCTGGAAGAAGTCAAGAAAACGCTGTCTTGTAAGCT  
GTTTTACATTCATCTGGACAGTGCCAGCTGTTTCTGCGGAGCCTCCTCCAACCTTGGCAGCTGCAAAAGC  
CACTGTCCCATAGCTGTAGCTAAACCATCTGCTGATGGTTGTTCAAAGCTTGCGAAGAGCATCTTTG  
ATTGCTTGTATTTGCGCTGGGAGCTCGCCATCCGCACCAACAGTTGATCTGACATCGCAGTCAGCTGAG  
CCTCCATAGCTTGTAGCTCTTTAGCTGTTGCAGGATGTTTTACATTAATTTGTTGATCATAGATCGAAA  
ACCTTGCAATTGCAATCGCTGCCATTTCAATGTTCTACATCATCAAGCAACAAGGAAATTCCTTCTGAATG  
TTAGAGGATTTCAACGCTCCTGCCCACTTCTGCGGAAGCAGCTGACCACTCGGACCAACGATAGGAA  
TATCCAAACCACTAGGTGTGATCGTTGAATATCTTGTGTGCTTGATTAATCTGCTCCTCAGCTTTTTT  
CACTAAAGGCGAGTCCGCTATTTCTTGATGTTCTTGCTTTAATTCGTTTACCTTCGTTTTAGCAGCATCA  
ATTAATTTCTTCGTGGCTGCGATATTATCTGGGCTATTACTTTGCCGTGCTTGAAGAAGTGCAGCCTGGC  
TTTGATCCCCAGCATCCACAATAGACTGCAAAGCTTGTCCCTAACTTAATTCCTCCGTTTCAAAAATTCCTT  
GATAACCTTTTCCACATCTGTAAGAAGAGCTTTATAATTAGAGATTTGTTCTTTAAGCTCTTTAATAATT  
TGGTGTGCAAGATTCCTGTTGATCTCTAACCGACTATTAATCGCAGGAATCTGATCCGCAGAGTCCGTTG  
TTTTCAACGCTTCTGTTAAAGATTTATTCGATTTTGCAGCGTAACGAGTTTATTCAGCTTATCAATAGT  
ATCTTTTTGTGCTTCGAGCGCTTCTTAATATTAATTAATTCCTCGGTATGATCGTTACTAGGATCTGAA  
TTAGCTCCATATCTTGGAGAGCTGCCATCAAATCAGCCATTTTCTGTTTTCGTTATTCAGCAAGTGTCTTAG  
CGTCTCTAATCCACTTTTTCGCCGTATCAAATTCGATTTAGCCTTATCATAATCTTTTGGCCGTACACG  
TGTAACCGTAGAGGTAGAAGTAGAGGCCCTAATTTGAGAGAGAGAGTCTGTTGGACTGGAATTTTTATTC  
AAGATGGCATCACGAAGAGAGATTAATGCATTCCTTGTGAGGATAAAAACTCAGCTGCTTACAGAGG  
ACGATGCTGAAGAACTCGCTTCGGACGCCTTCGTGGACTCTTTGGTTTCCGAATTAGAAGCGATTTGCC  
ATTAATAATTGGATTCATCGAGCTCTGATTAGAAGAACTGATTCGGTCTGATTCATACAATATAAA

AAAATAAAAAACCTTACTTAAATTATAAAAGGCAATAAAAAAGCCACACCCGTTATTTTGGGTGTGG  
GCTCTTAAAAGACTATCCCTTAAGGGATTAGAATGAAGAAATTAACCTAGGTCATACTTACGATAGGTG  
AAGTCGCTACCAAGGTTATCGTTAGCAGGCTTAGAATAAGCAGCATAGGCTCGGAAAGAACTGAATCTG  
TCAGACCCATAACGAACCTGATAGGAACTCCTTTATAGTTAGTAAAGCCGTTAGATTCCTTTAGGATCCAA  
TCCTTGTTTTGATAGCTTGAGCAAACCAATATTTCAATTTGGTTTCCGCGACCAATACCCGCAACATCAATT  
TCTGGAATCGCTAAAGCTTCAACATACTCATAACGAACTGTTGCAGACCAGTCTCCAGCTCGTCGAACAC  
CGCTAGAGAGCAGCCGATGAACCAAGCATGGTTTTCCCTTACCATTCGTAATTTTTGTTGCAGGAGTGT  
TGTTGATTGTTCCAGTCTCTGGTATTTCCGCTAATGGATTAAAGAGATAGGCTCCGTAAGTGTAAGA  
TTTTTTGTTTGTCCATTAACCATGGCATAGCTGTGCTCTTCCCAACCAACCATTGCCATACTAAATAAT  
CGTACTTGGTATTAGGTTTAGCTGGTTGTGCAGTGCTTGCCTGCTGGATCATTCTTTTTGCTGTTAA  
CGTATTCAGTCAATAACACTCGTTTTCAACGAAATTTCTGGAAGTTTATTTAAAATAGCTTCCACG  
ACCCAAGCATACTCTTCTCTGCCATATTCACGACAAAAGGACCACCATGAACAATCATAGTGAAAGGAA  
GTTTTCTACTAATACGTCGCGCAGCGTATAAATGAATTCGCTCGAAATTACTATTAACCTGAACGTCGGA  
ATCAAAAATATCTCCCAATCCAGAGCGACCAATCTCTGCAATACTTCTGCCTGCGTTTTCTGGGTTTTTG  
TAGAATCGGTATCCTAAGAAGGCACGATTAATATCTAACCCTGCTGCAGAAGATTCCTCCGCCAGCAATCG  
TTACCCAAATTCATTTTCGAAGTCATCCAATATTAGCAGCGGTGTAATCCACATACAAATGAATTCACT  
ACGATAACGATTGATAGGTAAAATAGGTTTAGTAGGAGTCTGAGTTGTCTCAAGATCCCTTTTTGCATAA  
ATCCATCGAGCGCGGACATCTCCAGCTAAACGTAAAGCTCCATCGCGCTTACGAGTTTCTACAAAACCCCT  
TGGAATCAATAAAGAACTAAATCTTCAACAGACCATAGCTGGCTATCCATCGAACTAGCCTGCGCAAA  
AGCCAAGTTTGTAGACCCACAAGCTAATAAAAGCGCGCCTACAAAACCCTTTTATAAAAGTATTTTTTTCATA  
ATGTCTTAGCAAAGTTTGCATCTCATAACAACCGACCCATGGTTTGTATTTTATTATCGAGAAGTGCTC  
ACGGAAATCTCTCTTCCCTGGGACGCTTGATTTTTTTTCGCAACGGTTACAAATCTCTTACTTACATAAGC  
ATGATCGTAACCAAGCCAAAACTATAGCTCAGGAAAGGATTTTTTTTAAAATACAGTTCTATTCCTTGGGA  
AGAAAAAGATGTCCTAAGAGACTAGCTTACAGCTAGTTTCTTAGGATAGACTGATGCCCTTTCAGTATT  
GGAAAGAAGTAAGATTCACAAGATCTTCTGTCTTTAGTAATTTAGCTAATCCAACAATACCGATAAGAA  
AAGTGCCGATTCGCAAAAAAGACTCCACACTGATCTAAAAAAGACACTAAAGGTTTTGTTGGGACTGTT  
AATGGCTCGATAAACACTACGTACGTGGTATGCGTTACTATGTTTACACCAATCGTAATAACCGCTGCTA  
GAATGGTTGTAATGACAGTTTTTCCACTCTTTAAATGTTCTCCACATCAATCCCTTTGTAAGTAGGAAG  
ACTCTTACCAGCACAAATACCATAGCATCGCTAACTGACCCACGACGCTAAAGAAGTGGCGTAGGCTAAA  
ACAGCAACCTGTTTGCAAACTAAACATCCGATCACATTAAGAACCATATTCACTACGGCAGCAATGATCC  
CTACTAGCATCGGAACTTTGTAAATTCCTTCTTGCATAGAATAGAGCCGATACGAGAGGAGCTAAAGCCAT  
AGGGATAAATACTTCCACTATAACCTCTTAGAACTTCTACAATAGCGTGCACAGCTGTTGTAGGAAACACT  
CCGTGCTCATATAACACTCGTACCCAGGCAAAAGCAAAAGCAATAGCCCCATCGTTATAACCACCATAA  
CAGCAACAGTGAGCTTCAACGAAAACCGCAGGAGATCATATCCCTTGTGATGTTCTTGTATCTTGAACACA  
ACGAGAAATCGCAGGTAGCAACACTGTGAAGACTCAAGACCAAATAAATGGACAGGTAACCTGCTGTATT  
CGCACGGAATACATCAGATACAGAGGTCCTACCTCATTGATATATCGCGGAGCCACATATCACATAGTA  
AGTTCAACTGAAAGATTCCTATGGATAACAATCCCTAGAGACAGTGGGGCAATAAGAGCACGGATACTATC  
CCGCTCCTGAGGAACCTCTTTACTTTGTCCCAAAAACCTCATGACTCAGGAAGCGTAATAGCCCATTCT  
AAAATGAAGCCTACGACAAGGACTACAGCTAATCCAAAATACGATTTCTCGGATCATAATTCCTGTGCTA  
AAAAGACCCTTCCAATCCACAACACATTAACAACAGAAGGAGCAAGTCTACGCTGAAAAACTTTTTCTC  
ACAATGCAACAGCGTGAATTCCTGTATACATCATCAGAAAGATCCCGGAAGGTAGCAATATGATTGTT  
AAAAATAGGGTATCAAATAGGCTTCCGTGAACGCAAGAACACCAACACAGAGTCTTAATTCCTATAATTA  
AAGTAAATAATATAGCGCTGTAACAAAAGAACTCTGAAAAGCTTTTAAAGAAAAACGTTGCTCGAGAAAT  
ATTTTGCGCACGTAAAAACTCGAAATGCGGAATAAAAGCGAGTCCAAAGAAATAGGCCACCTAAAAGCTTT  
CTTAAAAAAGATCGTCCGAAAAGCCAGCCAAAAGATGCTACTAAGGGATCGGCTCCGAAATATGTAG  
CCATAACAATTTCTCGTAACATCCAGTAAGACGACTAAAAACGTTCCGGACAGCAATTAACAATGA  
GCGCACTAGCGATCTTTCATCATCTTTCCTCATCACTCTCCTCTTTTTATGTCTTTTAAAGCCTTTTTAGG  
CCCTTTATACCGAATAACGGCTAGTGATATTTTTCTGATAATGCAATAACTACCATTATTCGCTATTT  
ATAGTTCTTTAATCAAGAACCTCTGGCAATCTTCTATCATGAATGACTAGATAGAGAACGGGCTATGTT  
TATACTTCTCTCTCAAGAGCCTTACTAGGAGCCACACGCTGCTGCTGGAGGACTTCATAATGCT  
CTTTACGAAGGGCGCGATATCGGAGCAACCACCGTTCAGCTATTCACTGCAAAATCAACGTCAGTGGAAGC  
GACGCGCACTAACTCAAGAAATGGTGGATCAGTTCCGCATAGCACTAAATGAAACTTCTCTATCTTACAT  
CATGAGTCATGCTGGTTATTTAAATAACCCCTGGAGCTCCTAATCCGGAGATTCAGAAAAACTCGAGTG

TGTATGCACCAAGAAATAGCGGACTGCATCTCTCTCGGCATTTCTTTTGTCAACTTTCATCCGGGAGCGG  
CTCTTTCTGATTC TAAAGAAAGTTGCCTCGATCGTGCTATCACGAGT TTTTTCACAAATGGCCCCCTTTT  
TGAAAACCATCC TCCACTTGTTGTCTTCTTGAACAACCCGAGGCCAGGGT TCCCTAATAGGAAGTTCT  
TTTGAGGAACCTTGCTTACCTAATTC AAGGGAT TAAAGCCCTCATACCCATAGGTGTTTGTCTAGATACCT  
GCCATATTTTTGCGCTGGTTACGATATTTTCATCGGTGCGGGATGGGAGCAAGTACTCAAACATTTTGA  
CGCAGTGATTGGAT TATCTTTTTTACGAGCCATTC ACTTAAACGATTC TGTCTTTGCTCTCGGAAAAAC  
AAAGATCGTCATGCCCTATTGGAGAAGGTTGCATAGGCTCAGACAGTTTTTTGCTTCTTATGCAAGATG  
AGCGTACCCGCATGCTACCTAAATACCTAGAGACTC CTGGAGGACCAGATCTGTGGACTAAAGAAATCCG  
TTACCTACAAAAAGTTTGCTAAAGTCAACAGAAGGAGT TTTTCTCCTCTCTCTTTATGAAAAAAAGCCT  
CGCAAAGCGAGGCTTCAAAGAACATATAAATCC TTGAACCAAATGATTATGTTCTGTGGATAGAAACT  
CACAAATAACAGAAACGTTTACTGGTAAAGGAAGTTGAGAAGCGATTTGATCCAGTTCTGGAGCAACAAC  
CAACTCTCCTTTAAAAGCTGCTTTATCCAAAGATAGATAGGCAGGAAGAGAGCTTTGATCTTTGTTCTCT  
AAAGATTC TGTAACGATAGCTAATCTTTTTGATTTTTCTTTCAAAGAGATCTGCATTC CAGGACGAACGA  
AGAACGAGCGTCTATCCACCTTTTTCCCGTTCACCAATACGTGCCATGAGAAACTAAGTTGAGCAGC  
AAAGATCGTTTTTTCGAATCC TAGTCTATAGACGATGCTGTCCAAACGGC ACTCAAATTTCTCTAGGAAC  
ATTTGCGCAACGTTTCTTGCTTATTTACGACCTCTTTATAAGCCTTAACCTAATTGCTTCTCTAAGATCA  
TTC CGTAGCAAGCTTTTAATTTTTGCTTTTTCTTCTAAGCCGTAGTCAGATTTCTTTTTTTCTTTG  
CATGCCGTGCTGACCCGGAGGAT TGGGCTTTCTCAGCAAAGGGT TTCGACCTCTCCCAAAGATGTTAGCT  
CCAAAACGTCTCGCTATTC TGTTTTTTAGGGCCACAATATCTCGCCATGTTTCTAGTCTTATTTTTATTCCTT  
AAAAACATCGCCTCGCTAATTTTTATTGGGAGACGTTGTTGAACGC GAGT TCCCGCGCTTGACAAAAT  
ACAAAAGAGCATTC TAGTTCTATTTCCAATTTTCTACAACGGAT TTCTAGATTC TCAGTGCTAAAAAA  
CTC TTTCTATTTAAAAAATCTCAAAAAAGGTCGATTTAACTAGCTGTTTTGTTTAGAAAGATACTGAAAA  
GGTTTCTTTTTATTTCTTCATCAAAACTCTTTTGATCTATTC TTACCATCTCGTATACTGCCTCTCAGCCA  
TTTTAAAAAGTTTTTAAACAAACTTTTCGAGCTTCTCGATTTTAATCTTAAGATAAGTTTTTCAGCATATA  
GGAT GTCTTCATGGAAA GAAT TATTATGCTTTAGCGTATTACTACTTTGGTCCCGTAAGCAACCC TTAT  
GAAGAAATTGCTTTACACAAGCAATTATTC AAAACTATGGAT GTTCTTTGCCGGAT TTACATCTCTGAAG  
AAGGGAT TAACGGTCAGTTTAGCGCTATCAGCCAGACGCAGAACGCTATATGGCTTGGCTGAAACAACG  
CCCAGATTTTGCCTCGATTAAATTC AAAATCC ACCATATTGAAGA GAAT ATCTTCCCTAGAGT TACAGTG  
AAGTATCGTAAAGA ACTC GTTGTCTTTAGGATGCTCTGTGATAACAACAAAACAAGGAAAACACATTTCCC  
CTGAA GAGTGGCATGAAAA ACTC CAAGAGAAT CGTTGCTTAGTCTTAGATGTTCGAAATAACTACGAGTG  
GAAAATCGGTCAATTTTGAATAATGCTGTTCTCCCTGATATTGAAACGTTCCGAGAAT TTTCTGATTACGCT  
GATCGTCTAGCCAAAGAGCATGATCC TGCAAAA ACTC CTGTGCATGATGTATTGCACCTGGAGGTATTC GTT  
GTGA ACTC TACTC CGCTCTTCTTTAGAGAAAGGCTTTAAAGAAGTGTACCAACTGGATGGAGGCGTGAT  
CGCCTATGGAT TAAAAATGGGAACAGGAAAATGGAGAGGTA ACTC TTTGTTTTCGATGACC GGATGGCT  
ATGCCTATCGATGAAGC GGATCC TAACGTGTCTCTTATTGCTCGTTGCTCTCTTTGCAACACAGATTCAG  
ATACCTACTACAATTGTGCAACACAGACTGTAACAACCTCTTTATTTGCTGTGAGTCTTGTATCGCTAC  
CCATAAA GGAT GTTGTTCAGAA GAAT GCTCTCAAGCTCCTCGTATTC GAGCTTTCTCTGCAGAGAGAGGA  
AACAAACCTTTCCGTAGAAAACACCTTTGTCCAACAATTGAACAGAGCTGTTGCC TAAAGAACAAGAAA  
ACCAACCAGCATAAAAAAAGAGACGCCACGTTCTGTGGGCTCCTCTTCCAAAGTCTTCTGCAGCCAGG  
TTAGCATAAAAAAGTATTTATTTCCATCC ACAAAAACACATTTTTGCACAACATCTCTAGCGGCTCCGAAC  
CTC TAATCC CCTCTCTGCAATAGGTGGAGATTTTTAATACAGGATTC AAAA GAAT GGTCTAGCAACTCT  
TTTTGCTGCCACCTCTCC GAAT AATAACGCATAGTTCATATGTTTCTCTTCTCTGATCATCTTGACTAAGAT  
CGGCAAGATCATCGCGTATTTGGAAAAGTAAACC AAAATGTTCCGGCAAATTC AGCTACTAAAGTGGAGCT  
TTCCCGTTCTCCTCCTCCAAACAACC ATCC TGATACGCAAGCAATTCAAAGAGCTCCTGTTTTCTTT  
TTAATAATCCCTAATACGTTCTCTTTGGAGAAATCATGAAAAAATACATCTTCATATTGTCTCTCTAAA  
TTC CTCTACGCCAAAACGCAACTC AATCAGCTCCAAAATATCTTCGTAAGCCTCTTCCACATCTTGTT  
ACAAGAACTACAGCTTTTAGCGCTTTTGCATTC TTAC GAATTC GTGCATAAGCAGCTGGAAT AAGAGCA  
TACGAAGCCAGGAGAGCCGAAGCTTCATCAAAAGCTTTGTGAACCGAAGGCTTGCCTCTACGCATATCAT  
CATCGTCCATACCGCAAGTCATCGGCTATTAACGTAGATGTATGGATATACTC AATAGCAATGGCGGT  
ATCC AAGACATCTCGCTCTTTATGGATACCTTCCGCAATAAACAACAAGCAAGGGACGAACGCGTTTC  
CCCCCTCCTAAAAGGGCATACTCTATTGGGTCTCTTAATCCACCC T GAGTGTACCGAAATCTCCAAAG  
AAT CGCGAAGCTTTTTTTCTACTTTTCGATCGATAAACGCTGAAAATAATCCATATCC AAGCAACTGCCTTC  
TTTTTCTCATCAACCTTTGTTTGCAAAAGGTTGTTTCTTAGTAAATGGTTTGGATTAGGAAGAATCTTTGT

AGCACTGGCTACATAACATCCTGGATTAAGTACGGTATTACACCCAACACTTACTCCTCTACCTAGGAAA  
GCTCCTAACTTTTTCCGTTTTGTATCATAACGCTCTCCAGAATGATGGAAGAAAATGGTTTTGCCATCTA  
ATCTAAAGTTTGCACAACGAATCTGCCCCCTAGATTCACTCTGGAACCAAAAACA GAATCTCTACATA  
AGCAAAGTGAGCAGCTTTCGCGTGATGCCCTAAATAGCTGTTTTAATCTCAGAACAGTGTCTATAACG  
CAATGTGAGCTAGTTATTACACCGCCTCGAATATATGCACCATGACGCACCTTGGGTATAGGGACCGATAA  
TACAAGGACCACAAAATAAGCCCCAGATTCACGTAAGCTCCTTCTTGGATTTTCGATAGTCTCTTTATT  
TTTTAGATACACCCCTTCTTCAAGATGCCCATGGATTCCTGAAAAAGTATGAGAAGCTAGTTTCTCTTCT  
AACAAAGTCAAAATAGACCAAAACAATTCAGCTTGGCTTACGATCTCTGGATAAAGAAACTCTTCTGGTG  
AAAATAAGGAGGCTGATAAAACCATAACTAAGCTCCTGATACAAGCATAGCTAGGTATTTAAACACCCCC  
TGGGTTTTTAAGAAAAGCTTGTATCTTGTGAGAGAATTTTTTATCTCCATCATCTGAAAATAGATACCC  
AACACCTCGTAAGGTGACAATTC TACTTCCATAAGCTCCTAACTTTTTCTTAAAGAAGCTATGTGTACG  
TCTACATTCCTTGCTACAATCGCTTGGCATGATTC TTAATTTCTTCAAGAAGATGTTTTCGTAAACAAA  
GTTGTCTTTTGTAAATAAGAAGTCGTTTCAAAATACCAGACTCGATGGTGTAAATGAACACTCCTTC  
TGGAGTTTCTACTGTGAGCTTCAATACATAAAAATACATTAGGCCAAAACGAATACTTTCCGGAACAGAA  
TGTAGCGAATGCTGAGAAAGAAACAAGCTGATTGCGGATTTTTAAAATTC TAGGAGTAATAGGCCGAATTA  
AATACCAAAACCACGATCCAAAAGATCAACACTAGTTTTCTTCATCAAAAAATCTAAAAGAACTAAAAC  
AAAAC TACCTTCTAAAGATTTTGGAGAACAATCTCTCTTGGAAAGCAATGAATATTCGCAGACAACCAAG  
TCTGCGGACAGTTCTTGTATATTTGCTGCCAATAGTGCACCGATACTCTTCAGGATTAAGCAATTC TTT  
TTGTTTGAAAAATAAATCCCAATGTTCACTTACTAGTAACACATGTTTAGGCCCGCCATATAAATAAA  
CCCATTGAACTATTAGATTACCTAATAACAACAAAATAGTTTTTTCAAAGAGCCTCAGAAAAAAAACG  
ATATCTTCAGACTTTTTTTCAAGTTTAGACTACACTTGTCTGTGATAAACAGCTCATTCCTGTCTTTAT  
CTAGTTTTTGATCGAAAAATTTGAGAGAAAATGAAAACGTTAATGATAACAACATCGTCAGATTC AAAA  
ATATTTCTAAAACCAAACA GGGTATTTTCGTTAATTTTCAAGTTAAAGGAGAGAGAGGGGGGGCTTCCTT  
TACAGCTTCTATAGCCGTTGATATCGATGCAGCTGATGTTTCTGCAGGAGATTC TTTAGAAACCATTATA  
GAACGCTGTGCTCTTATTGGTATTCGGGAATTTCAAAAATGC GAGTTTCAGTTTGAAGGAAT TATTTGTT  
TATAACAGGTTTCCAAAACCTTATATTCGTTGTATTTAAATAGCTTGACTTTGAAAGTTTTTACTGTAAA  
ACTGTGGTCCGTTAATACCCCTTATTTCTATTTTCTGGATGTAGCGCAGCCTGGTAGCGCACTTGCATGG  
GGTGCAAGGGGGCGGAGGTTCAAATCCCTC ATCCAGAACTTTCTTTAAGACTTTTTTACGCGATTC TTGT  
TGTAATCTTCTAGTTCAGTCTCTGAGTAGTCGACAAACTTCAAGAACAGCTCGTAAGCTGGATGAACT  
GAATAACCTCTCTAGCCATATCTATAGCAATTTTACGATAGCTTTCATGCCCTTGTGGTTGAGAGCGTAA  
CTCACAAAGCCACTGCAAACCTCTAGCGTTGATATGAAAAGCCATC GAATATTGTAAGCTAAAGGAACC  
CTCTGAAGGGAGCTTCCATAGGAGTGTGATCAATTTGTGAAGGCATCGTGTAACCC AATTTTGTGTCGTC  
AAAGCTGTCTTTCTT GAGTTAGGATACGATGTCTTTGTAAATCCCGATAGGCTCCAAAATCCGCTGTAATA  
TCAAAGCAAACCTCAGCACATCCCAATCCGCGAGGGGATTTGTGCCCGGATTC TCTCGGAAAGAAGCTC  
CCGACTCTAAGATACGCATGAGATCTTATTAGGAATATTGCGACAAATATCTAACAGCTCTGCATAAGT  
GTGTCCGAGTAGGGGAACATGTAGGCTGCAGCAATTTTGTATAACCCGTCTGGATCTCCGTATACTAAT  
TTTACACCAGCCTCTTTCGAAATTTCTCTCTCTTCCCGTAACGATGTGCAAAACTTTTTAATTGTTCTT  
TTAAAGCCCAGCGTAATCCACCATAGCTTGGTGATGATAATGATGAGACTCTGCGCGCTTACAAAAGA  
GGGAAT TATTTTCATTAATTC TGTAAAGGACTGCTCTCCAATATTGCGTACCTCAACCAAAC TATTGTCT  
TGCAAACGGTGTAGCAAGTTCTGCCAAAACCGGCCATTACCAAAAAACCTAAATTTGTGAGTGTGCTG  
CAGGTAACAAACCTCGTAAACAGTCTAATACTTTAGCTCGTAAAGAACTGTATACGCTGATTGAGAAAC  
TTCTGGATCTTTA GGGTATAGTTTCTCGAAATGGGAACGAACCTGAGGGATAAGATCGGAGTATGTGTTG  
AATAGGAAATCACAAGTATCCAAAAGACGTCTTTAAAGGCCGAGGTCATCAAAAATA GGGTCTCGGTAAT  
ATAAATACTCCCGTTAACTTTTTGATCGAAATAAACGTATCTAGACGATTTTTCTAGGGGGGACCC TCC  
AATCCGAGCATCTTCTAAAATTTTTGCTGCGAGCATGGATACTTGTTCAGAGCAAGATGCGCTCCTCCC  
AACTCTCCAACA GAATCATCACCAAGTTGTCTAAAACGCGACGATAGAAGTCCACAGCTTTTTGGATTC  
CCAAC TACAATCTTGTGGTTCATCATCAAGGAAAATTACCGCCTTCCCATCTAAAAATTC TTTCAAAG  
AAGCGTTTCGCAACCCCA GAGTTCGATCTGGAATATTTGAAAATAAAGCGCCTTTAACCCTTCTGGAAGG  
TTTTTCAAAGCAAATATAGGC GAGTCTAAATTCGTACAAAATGCGATAAACGCGCTCTTTGCTCCTCAG  
AAAAACCACCTCTTTGCTCAACATAAGAAA ACTCTATAAAGCAGATTAGCCTACCACACATAACAAA  
CACTCAAAGTTTTT CAGCAAAAAGCTTGTGAAAAACTTGTGACCACCTGTTTACAAATAGGCATAACT  
TTTTGTTATAAACAATTTAAACAAGCTGTGAACAAAGTTATGAACAT TATTTTTCACAGCTTTTTCTCTCG

AAACAACAATGTTATAACAATTTCCACATCCCTAAAGAAGAAGAACTAATAAATATCTCTACGAATC  
TTCTTCTAGGGGGTGGAACTTTCGATAAGTGTACAACCTT
