# Supplementary material
Source: PubMed Central journal article supplement (PMC8373233)
Supplement: iai.00108-21-s0003.pdf [file iai.00108-21-s0003.pdf]

C. trachomatis L2/434/Bu dCas9 site (TTTV or complement)

ATGACAAGGCTTCCATTACTAAAACGACCTCGCAGAAACCAGAAAAGTGCAGCCGTTTCGATCTATAATTC  
AAGAAAACCAACTCTGTTCTAGTGACTTGATCTGGCCCATCTTTC TTAAAGATGGCTCTGGAATTCGAGA  
AGAAA TAGAGAGTATGCCTGGAGTATACAGATGGAGTTTAGACATGGTCTCTAAAAGAGTTAGAGAGACTT  
TG TACGATAGGATTGAAAGCAGTTATCCTCTTTC CTGTAATTGATGCTAA TAAA AAAGAACAATTTG GAT  
CCTATGCGTCCCATCCTTACAACATTGTTTG TAAA GGGATTCAAGCGA TAAAAAATCTTTTC CAGAATT  
ATGTGTCATCAGTGACATAGCTTTA GATCCTTTTACAACCAGTGGTCACGATGGGATTTTTCATAATAAC  
TACGTTATCAATGATGAAAGTGTCCGTGTATATGGGGGTATCGCTGTCATGCATGCGGAAATGGGAGCAG  
ATATTGTTGCTCCTAGCGATATGATGGATGGGAGAGTGAAGCATATTCGAGAGCAGATGGATCAGATGGG  
GTTTG TCAACACGGGTATTCTCTCGTACAGTG CAAA ATATGCATCTGCATTGTATGGCCCA TTTTC GGGAT  
GCTC TTTCTTCACATCTTCAGTCTGGAGATAAGCGTACATAT CAAA TGGATCCTGCCAATGTTCAAGAAG  
CGTTGCTAGAGTGTGAGTTAGATGAAGAAGAAGGCGTGTATGGTGTATGATAAAA ACCCGCAGGTTTTTA  
TCTAGATGTAATCGTTAAAGCGAGAGAAAACACCCATCTTCCGGTGGTAGCCTATCAAGTCAGCGGGGAA  
TTTTCTATGATTATGGCTGCTTGCCTTCATGGGTGGT TAAACAAAAGAAA GTGTAA TAAAAGAATCTTTAT  
TAGCGATTAAGAGAGCTGGTGCAACAGCTATAATTAGTTACGCAACACCATGGGT TTTAGAATGGCTAGC  
TAAA GATGCTCTTCCC TTTGAGAGAAGTGTTC TTTGAAGAAC TTTG TGCAGCACCGAGATG TTTACGAGG  
AGGTACCACATTCTCTTTTGCGTAGCG TAAAAGAGATTCTTTGACGATAGAGAACATCTCGGCTTAGA  
AGGATCTATGAATGTGGGGAGAG CAAAATCTTCTGGAGCAACTTCTAAGAGCCCTAGGCGACACGCTTCT  
TCAAAGT TTTGTG TTTCCAAAGCTTTAATAATAAGAGCTACAGGAACCGGGATTGCT GAAA CACGCTCAT  
AGATTTTCAGCATCAATAATGGGCCGTT TTTCTCCATGCATGTTGGTATCCATATCCATGAAGACCCGTTT  
TCTCTT GAAAAAACCAGATAGATAGGTTTCGTGTGACTGTAAG TTTA TTCCAACCTAAGCGCAA GAAACTG  
AAAGATTCACGAGT TTTAGGATTAGGAAGGAGTGTATGGTATGGTCTCTCATACC TAAACAAGGATTTT  
CTTCTTT TTTA CATAATCTTCTGTAAAGAGGATCTCCAGAAA TAAGGGTAATCTCATCGGAAGAGAAAAT  
GTC TTTAGGAAGAAGATCAGAGAAA CTAGCGCC TTTTCGCAGTAATGAGATAT TTTCTTTGAGAAGGAGGA  
AGAGCTGATCCTGCTAAGGCAACGATTTTGTTGTCC TAAAACAAAAGCCT TTTAAAAATAGATGCCCTATAG  
ATAACACCTCTTGAAGCTAATAG TAAACACAACATCTCTTTTCG TTTTCGAATACGAGCGATGTGATGAAT  
GTGCGTTGAAGGAGATCCTGATGGGAAGGGGCCATCTATTGTGTGTAAGTGGGCTATGGATACGAGATCC  
TGGGTTGGGAGAGTTAGTCTGTCTGTAGAAA TGATATGAGGCTTCAGTCCAAA TAGT TTTGCTATTGCCCT  
GAACTCCACAA CAAA AATGTAATAACCATCTTCT TTTGAAAGAAA AAAGACTGAGATGTTTTTTC CACAGA  
AGGGGT GAAAGGGCGATTATCCGCTAAGTTAATAAAA AACATCTCGAGGAGATTGTGTTGGAAGAGCTGGG  
ATAT CAAAAGGTCT TTTGTTTGAAAAGAGC GAAAAGACCTTCCCTTT TTTAAAAACTTC TAAAAGATCTTTT  
GAGT CAAAAGATTGAAGATCATAAGAAA ACTTAG TTTGAGAAA TACCAGGCTTCTCTTGATGACGATCTC  
TAAAAGAGCACG TTTATTTCTCTACGGATCTCTACAACCTCTCCATCAACAGGAGAGGTAATAAA CACT  
CCTGAAA AAAGCTTGTACTCAGCCAGGGGAGAACCAGCAGTAACTTGGTCTCCTGGAGTAACC TTTACCT  
CTAAA GGAAGGGGAGC GAAAGGCCT CAAA TCCACG GAAA CATAGGTGGGGTCCACCTTACCG CAAA AACC  
CGATTCCTTCGGAGCTCCC TTTAAA GACAGATCTAATCCGCGA GAAA CAACTAT TTTTCATATCTCGGGAT  
TATAGAAGTT TTTA TAAGGAATCCAATTTTT TTTCTTACTTTTT TTTCTGAGAGGAGGATTTTG TCTTTT  
TTGCGTTGGAGAT TTTG TGGGATGAGTGACCAATATCATTGGTTACTTC TTTGATAAGCTCTTCAG TTTTC  
TTTT TTTGTATTTCATTGCAAGAGGAACGAATGT TTTCTAGAGCTCGCCACTCTTCAGGAGAAAAGTTATCT  
GGATTATTAG CAAA TACTTCCA TTTG TTCGCGAGTCAATCCCGTCTGTTGGAGAA TTTCTCTGCGATCTTT  
TG TCTAATCTTGGATTT TTTCTGTGTTTT TTTCTGATCAGCA TTTG GTAGTCCAGATCGTTGTGCTCAGT  
AAGAGTTGCTC CAAA GGAGGGGTGCAAGTCTAT TTTATAAATAGAGAGAATTTG TTTTATAGAATCTATA  
ATTT TTTGAGCGGAATTATTT TTTCTATAA CAAAATCTCGATGT TTTATTTAATAA TAAAATTT TTTCTTGT  
TT TTTG TGATGTAATATTGCTCTTT TTTGTTATTTCGGCGTATA TTTCCGGACTAAA AAGGGGAGCCATCG  
TGGATTATCTAGAAA AGCTGCAGTCC TTAATAGAAA ATCATCCTTCGGATTTTT TTTAG TTTGTGGGAAGA  
GTACTGT TTTAATGATGTCGTTAAGGGGGACGAGCTAGTTGTCTTACTG GAAAAAATCAAGGGCTCAACT  
ATAGCCCAGCA TTTG GGAAGATTGCT GAAAGTGTAAATCC TTTATGGGAACAAC TCTCTGAAGGAGAAG  
AGAAA GATAAAA GTACTCTCTCTGGTT TTTGATGTC CAAA CAACAAA CAGTAAGAATCTGCTAGAAA TAGC  
TCTTCAACAGG TAAA AAAATACGAAGACTCAGCCAATTACAAGGAAGC TTTACGAATAGTTGG TTTGCGA  
GACGGGATCACCT TTTCTCATTGTCTCGGACGT TTTGCTTTGCTTATGCACCTAAGTGAAG GAAA CTTTG  
TT TTTTCATCAAGGTGGTTGGGGAGTTGGAGAAA TCATGGGAGTCTC TTTCTTCAACA GAAA GTTCTTGT  
TGAG TTTGAAGGGGTTCTTACGGC GAAAGATATCTCT TTTGAAA CAGCTTTCCGTATGTTAGTTCC TTTA  
AGAAAAGATCACTT TTTAGCAAGAAGG TTTGGTGTATCCAGATGCT TTTGAAGCG TTTGCTCG CAAA GAGC

CTGTAGCAGCCATAGAGTGTCTGT TAAAAGATTTA GGACCCAAGAATGC TAAA GAGATCC GAAA CGAGCT  
GGTGGAGCTTGTGATTCCTGAAGAAGATTGGAGTCGTTGGTGGCAATCTGCTAAGAT TAAAAT GAAAAA  
GATGCGCGAATTTTAGCTCCTGCGTCTTCAAAGATCCTTATGTATTCGATCC GAAA GGATTTTC TTTTG  
TTTC TCAATTACAAGCCTC TTTA TCTGGAAGCAATGATGCGAATAAGAAGATCACTTCTTGTATGCTTT  
TGTAAGAGATTTTAGGAAGTGAGCT GAAA GATGAATCTAATCGACAATCGGTCAT CAAA GAGT TAAA AGCT  
TTAGA TTTGCCCGCTGATTCCGCTTTG TTGATC CAAA GAGCGATGTTGTTATCAGAG TTTCTTGGAGAAA  
AAGCTCCGGAGTTAGAGTAT GAAA ATATTG CAAA ACTCTCTGAAGATCAGTTATTCGATATTGTGAATAA  
CATAGAGATTCTCTC TTTACAGAAGAGT TTTCTGGC TTTAATCCACTCATGTTCTCCTG TTTGGTTCCT  
GTGTATAC CAAA CTC TTTCTCACAACAAGCACGTCATGCTTCGTGAACAGGTC TTTAAGGTCTTGAATG  
CAGAT TAAA GAAGCTCGCGAGAATAT TTTAAAAAAAAGTT TTTG CTATGATTGAGCAGCC TTTGCTTTA TCC  
AGAGCTTT TTTGTTTG GTTAT TTTG CTCGTGTGGTTGATGGAGAAGACGG TTTATTTG CAGAGTCTGATAAG  
AAG GAAA TCGAGCGG CAAA TGCTTGCTAGCGCATTGGAGCTTATGCA CAAA GTCGCTACAACGCCT CAAA  
AAGAT TTTAGGGAAA AACTCTATTCA TT TTTAGTTGGACAACGGTT TTTAGTTATTCGT CAAA TCATAGA  
TCAAGCTTCTATAGAGTATCT TAAA GAG TTTGT TTTA TTATCTTCTAAGTGCCCGCAA TTTA CTCAAGGG  
GATCTGGGAGT TTTA AGAAGTTTG GCAGAAGTTGTGCAGCCAGCTCTTAAGAGAGGGACTCTAGAAGAGG  
AAGAAA ATATTCT TTTG GACTACTTCAGATAGT TTTA CTCGTAT GAAAA CAAA CTACAATCTCTGGTAGG  
GAAA GAGATGGTAGAGAATGCTAAG GAAA TAGAAGATGCTAGAGCCTTAGGAGA TTTAAGAGAAA ACTCT  
GAATA CAAATTTG CTTCAGAGAGACGGGCTAGACTACAGGAA GAAA TTCGTGT TTTG TCTGAG GAAA TCA  
ATCGAG CAAAATCTTAACTAAA GATGCTGT TTTACAGATTCTGTTGGAGTGGGTTGTAAGGTTGTTCT  
TGAAA GTGACCAAGGAGATAAGG TTTGCTACACTATATTGGGTCCATGGGATGCTAATCCGGAT GAAAAG  
ATTTTATCAC TAAAATC TAAA CTGGCCCAAGAAA TGTTG GAAA AGCTGTTGGAGAAA CTGTACTGTTTC  
AAGGCAAGAAGCACAAAGATCAAG GAAATTTCTTCTATATGGGAT TAAA CAGAAA TTGGAGCATAGCGGGA  
TCGAACCGCTGACCTCAACAATGCCATTGTTGCGCTCTACCAACTGAGCTAATACCCCGAGGGAA GAAAC  
TAGGTTATCATG TTTA CACGATTTA GGACAACAAGCTGTCTACTTACTG GAAAAAAGACAGTAAGCAGC  
AGTGCCTATAGAGAGGTTTATTGTGAGTCTTT TTTGAACAGTTACCTTCTTTTC TCCGGATTCTATTC  
TTGG TTTAGCGCAGGC TTTCCAAGAGGATCCTCGTGAGGATAAGATTAATTTA TTTACTAGGTACTTACGA  
ACGG GAAAAGAAA CGCTATGGGGG TTTCTCGAGCGTTA GAAA GGCTCAGTCTGTTTTT TTTGACGATGAG  
AAA GATAAAAATTATCTACCCAT CAAAGGATCGTCTACCTTTTGA GAA GAAATGGCAGCTCTTTGTTTGG  
GAGAAGTGGATGCTAATCGATGGGTGGTGTGCAGGCAATTGGAGGTACAGGAGCCTTACATTTAGGGGC  
TTCTGTATATGCCAACGCATCTTTAGCGGGTAAGGTGTATATTCTTCT CAAA CATGGGGGAACCATTCT  
AGGATTT TTTCTCATCAAGGGTTAGC TTTAGAGTATTATCCTTACTATGATCAGGAGAC CAAA GAACTGG  
ATTTA CAGGGATT GAAAGCTGT TTTG CGATCTGCTCCTGAGACTTCATTAGTCTGTTGCATTGTTGCTG  
TCATAATCCTACAGG GAAAGATATCCTC TTTCCGAGTGGCCA GAAA TCATTACGATTATTAAGGAGCGG  
GATCTTATTCT TTTCTTTGATATGGCTTATTTAGGT TTTGCTAGTGGGATAGAAGAAGATCGTCGTCCTG  
TGCAACTGTGTATAGAAGCTGGGGTACTACT TTTG TAGCAGGAAGCGCTAG TAAA AATTTTTC GTTATA  
TGGTTCCTGTAGGATTT TTTG GAGCTATCCATCAAGATAAA CAGGATTTAAA CCGTATTTTATCCTTT  
TTA GAAGAACAGATTCGTGGGAGTACTCATCTCCGGCTAGAGAAGGAGTTGCTATCGTGACTTCTATAT  
TAAGCAATCCTTACTTACGGCAAGAATGGGAGCTTGAATTGAATGGCATTCCGGCAGTC TTTGGAAGAGAT  
TCGTTCGAGT TTTG TGATTGCCATGC GAAATGTAGCGGGGCACCTC TTTCGATTTTC ATAGCTTCTCAGAAA  
GGATTT TTTGGGTATCCAGGTT TTTCAAAGGAACAAGTGCTGTCCCTTAGAGAAGAGCTTGGTA TTTACA  
CAACCGCAGGCGGAAGATTCAA TTTAAATGGCATTACGGATAAA AATA TAAA TCGTGTTACTCACGGTTT  
TGCTCAGGCTTATGAATACCCTCGGTCCGTATCA TAAACGCGTTCGGTTCATTACGTATCTTT TTTGTTGC  
CTTCGGGATTATTGTGAGTTGGAATCTTCTCGAAGTGCTTACGAGTCTATCCAGGATACATTCTGTTCCG  
GTGTGTTCCAAATTTCTTCCA TTTCCGCAAGGGTCTGATTCTCAGGCCCTTGTGAA GAAACTCAATGCT  
TTTTATTGAAAGAAAAAATTCGTTTATTGGAAGAGCGTATTCT TTTCTATGGAAGAGG CAAAACAGTCTCC  
GCC TTTGTTTTCAGAAA TTCTATCCTCGTATTTTC AATCTCCATATGGAAGAGTTATCT TTTCCGAGAT  
CCAGCACACTGGGGTAGTCTTGTGGATTAATATAG GAAA GCGACAGGGCGT TAAA AAGAATTCCTCG  
TTG TTTG CCGTAAGGTTGTTGTGGGGTTGGTGGAT TTTGTTGGTGAAGCGCAGTCTCGTGTACGATTTCAT  
CACCGATGTGGGTAT CAAA CCTTCTGTTATGGCGGTTCTGTTG GAAA TT CAAA CTGGGTTGT GAAA GAT  
CAGCTACGTACATTAGCTAGGAACGTCGTAATCTTCCGGCATCTGCT TTTGCAGATAGTGATAAAA CAGG  
AAGCTTTACATCTCTTGCAGGCTCTAGAGGATTC TTTA TCTCTATCAGAA CAAA ATGAT TTTGCTCTTCG  
TGGAAATG TTTGTGGTCTGTTGGGATCCTA TTTGGAAA CCGGAGGCTTCTATACTTAGCGGTAGCGATTTT  
GGT TTTGTAGATGG GAAA ACTATCGAAGTTGGAGATGTTCTTGTGACCACAGGATTTGGATGGTGT TTTCC

CTCCAGGACTTCTCGTTGCTACAGTCAATGAAGTCTTCC TAAAAGTGAAGGATCTTGTTCTTTGAAGAT  
AAAAGCACAATCCTTAGCTCCAGATTGTTCTACGGTGGATTTTTTGGTGTACCACCAATGGATTTTAAT  
CCTAATGATCGTCCTGATATT TTTGGTTTGATTTGGGAGTAGTTAGAAGGGGTTTAGTTAACGTCCTGGT  
TG CAAA AATCCATTGCCCTTGTCAATCCAAGCCTCGGATAAATACGAAGGCCATTTCTACTTGCAATGATG  
AAT TAAA ATTGGTGTAGGAACCT TTTGCTGCT TTTCTGTACAATCTCTCCTGTCTATCTAACCTTGACG  
TTGAATATAGAGATGGAGTTGATCTGGGGAATAGCAAGAGG TTTCATCTCCTAA GAAA GAAGT TTTCCAG  
TCGATGAT TAAAAAATCGACCCTTATGTT CAAAAAATAAGTCGACGATTCCTTGCCACAACCTCTCTTCTT  
CTTGTAGTAAGAAA GTTTCTCTACACGTATGTTATGAGGATGTATATTCCTGAGAG CAAA GGTATCCGGA  
A GAAA AAGGAAGAGTCGTT GAAA AGACCGTATAGATTT TTTCTGCAATAATAGACTCGTATCCTTC TAAA  
GGAGTGT TTTCAATAATGTCTGAGC TTTATT GAAA A TTTCTT CAAA ACAAGCAG CAAA ATTCCCTGCTA  
ATGATTC TAAAAG TTTA TGAATCAACGTTCCCGTTAGAGAGCCTCCAG GAAATAAA AGAGAAGGTGACAG  
TTCTTGAATAGGTTCC GAAAAGTGAAGATTCTTACCCTAGAAGA GAAA GAGTGAATAGTTCCGAGAAGGG  
AGATGTGGAAGA GAAA AGTATG TTTG TTAGGGAAGACGTTCTCTATCCGGAGTTAGAGAGC TTTCCAGGAG  
GTTGGAAGCTTGAT GAAA ATAGTTCCGGAGATGAGGAAGTCAAGG TTTCTAC TAAA TGAGGAACGCTATG  
ATGT TTTGTAACATTAGCATAGTTAGCAAGAGCA GAAA GTTTT TTTGTGCTTAGTGAGCGTTTCTCTATA  
GG GAAAACGGAATAAAA TAAGAATTT TTTAGCTCTTGTGCATGCGACATACATTTCTCGCATATGAACAG  
AAGGAGT TTTCTCT TTTGCTTTGTTAAGGCAAGAG CAAAATACTACATCGTATTCGAGCCCT TTTGAAGA  
GTGAACGGTCGTAAT TTTATCATATCTCGTCATTAGATTGCGACGAGAAAAGAAA GCTCTTCATCATAAC  
TTCCCTGTAATCAGAATATTGATGAGATGTAAGAG TTTGTGATGGGGATTCTCTGTAGT TTTATCAAGAT  
ACAAGCATAGCGCTTCTAATTCTTG GAAAATGATATCTCCAAGAGGGG TTTGCAATAATGTTTCTCCTAT  
GG TTTGAGATAAAAACGT TTTCTCCCATCAGCTTATAGAAGGTAGCTAATAGAGAATAGTGGTAGAGATGT  
CGATTCAGAGT GAAAAA CAAA GAA GAAAACGT TTTAAGATGCTGGTGAATCTCCGTAGAG GAAA GCT GAA  
ATAGCCGGCTCAT CAAAATGGCTTGAATCTTTTGTTGATTCTCTGGGTACAGAAGGGCTTCCAATAGTAG  
AATCAGAAGGTAGGGGGATTCTGTGCGAT CAAAATAACGTT TTTCTTTG CAGTAGGCCATGGGGATGGTG  
CTGTGAGTGATTAGCTTCCAGAGCCTGTGGATAGTCTTGTACTAGAACAGCCATA TTTCCAAA TGGAATGG  
AATACGCTGATCGAAGATAAGAAGCTGT TTTAGAAA TCATAACG TTTCTTCTTGAATGTCTTCTGAGGA  
GAA GAAA TGAATAGACTGAACTCTGAGTAGGAGATCTCCGAGCTCC TTTAGAATG TAAA GGGTGATAC  
AGAATGT TTTGTGGAGTCTCTAGAAA CCGTGTGGGAAG GAAA CAAATGGTTGAGACCTTGATAAGCT  
CTGGGGTGGATCGGTAA TTTGTATC TAAAATAAGCTGAGCTTCT TTTGGGAAGGAGTGT TTTGCTTGCAA  
GTATGTGGGGAGGTCTGCATTTCTCCATTCATAAAA TAGACTG TTTAGGGTCTCCGATAAGAAA AAGGGAT  
CCTGAATAGTCTGGAGAAG CAAA GAG TTTAGAAA AGATCTGCCACTGACG TTTGTCAGTGTCTTGGAATT  
CATCGATCAAGACTAGCT GAAAATTG TTTACGTAGTTGTGAGACGACAGTATCGTTGTGATCTAGAAGAGA  
TTCTAAA GTAGCTATGCT TTTATCATGGAATAGGATTGTGCGCAGTGAGT TTTCCAGATGTTGTGTCACG  
CT TTTAAGTAGCGTATG GAAAATAGGTTCTTTTTGG CAAAAGGATGAGCTAAGTATCCAATCTTGGA  
AAAAGGATC TAAA GGAGAAGCTGGAGCACTTAATTT TTTCTTATTGCGGT TTTCTCCT GAAA CTCTG  
TACCATTCCTGG GAAA AACAGCATATC CAAAGAATAAGGATTGG TTTCCGAATTGTTGC CAAAAGCAGGG  
AGTTCCCGCTCGATAGAGAGATCGC TTTGTTAAA ACGAAGAGAGAAA GCTTGCATTTCTCAGAGAGAGA  
GAGGAGCTAAGTGTGTTAGTAGCAGGAGACCCAAGCT TTTAGTT TTTG CAGGGTTATCGATAGAGGCGAGAG  
CGC TAAA TTTG GTGTGGAAGTGAATCTTGAAGTAGTCTCTCTATTAGGTGGCGT TTTGTTGGGTAGTA  
GCGCGGTGATGATAAGATAAGAAGGCGTATTG TTTGGAGAGAGAACCCTGTCC CAAAGATT TTTACGTA  
AGTAGTCTAGGATATACTGTTGTATGG TTTGAGGCTCTGAGAAA ATGGAAGACGGCTGAATAGGCTGTAT  
CCAAGGGAAGTGTGCTCCAGTG TAAAACGACAAA ATCCATGAATAG TAAAGATGTTTCAATTTCTATAA  
GTGGCCAGGCTATTACGGATCTTCATG TAAAGCTGT TTTACT TTTGTTTCTGAGGAAGAGATATAGGGAG  
GTAAGGGAGTCCCAGGATGAGAGAGTGCCTGGGA GAAAAGACTCAATGCTTG TTTGAGGCTTGCTTGAAT  
ACGCAGT TTTAATTCATTGGTAGCTGCGTTGG TAAA TGTAACCAC CAAAATGTTCT TTTGTCTGTTCGATC  
GAGCCTTCTAATAACGAGCGAAGAATCACTTGTCTATGGTGAATGT TTTCCAGTTCTGCGGAAGCTT  
CTAA GAAA AATTTCCAGAAA CAGAAGCTGTTGGT GAAAAAATAT CAAAAGAGCTCATATCAGT TTTGTT  
GACTATCCTGAT TTTATAAAGAGAGAAA GAAGCTGCGAGAGCACGTCATTAGAGAGTTCTGAG CAAA TTTCT  
TTCTGTATCACGATTATGGAACCAC CAAA AACTACTTGTTAGGGGTCTTCTTCGCTATC TAAAAGTTTT  
TTTA TACACTGTGACGCTGAATCAGTTTT TTTAATGTATTCCAGGCTTGAGCAGAAGGAAGAGGAACAG  
CTTGAT TTTGTAAGAGATCATAAGGTTGGATCGCGGGATCAAGTAAGATTCTGGAGAG GAAA AAGGAGG  
GAGGATAGGCTCAATGTCATGAGGTGTAACGCGGAGGATGGTAGCTTC TTTAGGAAGTAGATGAGAGGCT  
TGTAAGTAAAGGATAGGATAGGATTT TAAA TAAGATTCTAGTT CAAAGGCATC TTTAGGGAATCCAT

GAGT T T T C T G A G T T T T C T T A A A G G C T T C T C C C G G A T G C A T A G A A A A T A G A T A T A C C C C T T T T G A A C A T A C  
G C C A T G A A T C G T C C C T T G A A G A T G A A T A T T T T T T A G G G G G A G A G A T A G G A G T A G A G G A G G G A C T T G T T G A  
T C A T T A G G A T G G A G T G G G T C G T G A A A A A G T T G A T C G G A A A T A C A A C A G A A A G G G G G T T G T A G C A G G A T  
C T T T C T G C A A A G T T T C T A A G C G T T T A C T T A C A G A G T C T T G T A C A T C G G T G T A T A G A G A T T C T G T A A A G G C  
T G A A A G A T A A T T A G T A G T G G G T A G A G G A G T T T T A G A A G A G A A G G T G G T T C C A A A A A G C T T T A G C A T C G  
T G A G G A C T A G G A A A G A C T T T T C T G A T T T A G A A A A T A G T G C T T T G G G A T G A A A G A A A G C C A T G T T G C G  
T G C T T A G G A A A A G T T T A A A G G A T C T T T G A A A G C T T T G A T T A G A T G T T G T A G G G A T A G G T G T G A A G G T A A  
C G T C T T A G T T G T A T C A G A C T T A A A C A G G G A T G G G G C C T T G T T T T G T A G C G G G G A G A C T T G A G C C A T C C G G  
T A G T A A A C C T G G T A A G A C T G A T G C A A C G G T T C A G A A G A A A G T T T T C T T T A G C A T A A A G T T T C C C A G A A  
G A T G T T C T T C T T G A A T A G G C A C A G C A T C C A A C A A A T G T T T C A A A G C A G A G C T C G G T A A T G C T G G A T T C T T  
G G A T G A A G A G A T A A C T A A T A T G G A G C T G G T G T T T T G T A G A A A C G A T A G T C T G T A G A A A T G T A A G T T A  
T C C T C A T C T T C A G T G G A G A A A A T A G A A A T C T T C C T G A A T G A G A G A A G G A T C A A T A A G A A A A C T G G T A T  
C G A G T G A G T G A T C T T T T T T G T T T G C T C C A A G A A T A A A A G T A T A C C C T T T A G G A A T T A A A C T G A G A C T A T T  
T A A A G A C C C T A C A A A G G G C C A G G T T G A T T G T A C A G T T G G C T A T G A C C A G G A A T A T G T G A G A G G A A G T C T  
A A G C A A A A C T C A A T G A A A A T G G T T A A A G A G C A A G A A G A G C G C A C A A A A G G T T G T A G T G T T T T G A T A A G G  
A A A C T A A C A A A G C A T A C T C T T C C G T A G A G A G G A A G A A A T A T T T T C T A A A G C A G A A A G A T A A G A C G A G A  
G T G C T C T T C G T A G G T T T T G T C T T T A G A T T C T A T G T A A C T G G C T G T G A C T T G T T G T A G T G T G T A A G A A G A  
G G A A C G A C A A C T T C C C A T G T C T C A G C T T C A T T A A C G C T A C C A G T A T C A T C A A T A A A C G G A T A T T C A T C C A  
A A A T A C G A T G G A T G A G T T G A G T A A G A G G A G A G T C T T T T T G T G A T A A G G A T T T C C A A T A G T G C G T A A G T T T  
A T G G G T A A G G A A G C C C A T T T T T G T A G T C T C T A A G G G G A G A G A A G A T C A G G A T G A G A A G G A T A C G A A G T  
A G G T C G T T C A G A G A G C C T T T A G A G A A T A G A A A G G T C A C T A C T A A C A A G A G C T T G T T T T T A G T G T G C G G G  
T T T G T G T T T T C T C A G T T T T T G T T A A A T A T A A A G G A A G A T G A G G T T C A A A G A T C C C T C T T A A C A A G G T T T C  
G T A T T T A G A A A G A T T A G A A G A G A G A A T A A A G A T T T T C C T G A G C A G A A C T C C A G A A T G G A G A A G C T G A G A A  
A C A A G C G A A A A T A A T T G A T G G A C T T C T C G G G A T G C G G A A G G A G C T T G T C T T A C A A A A A T A G T T T T G C G G T G  
A A T T A G A G A A C A G C T T T T G A T C T A T A G G T T G T A A A T G G A A A A A C T G T C T T T T A C A A T G T G T A A A G A A G A  
A A G T T T T T C G T A G G G T T G A A A C A G T T C T T C G T A G G A A C G C T A T A A T C T A A A A A A A G T T T T G T A G C G A C  
T G C G A T T T T G T G A G C A A G G T T G G C T A G T A A T G C T A A C C G A T C C G T T A A T A C A T A T T T C T C C C A T G T T T C T T  
G A T G T G G T T C T G G G A T T C T C G G G G A A A G T G C T G C C A T C G C T T T A T C A G A C A A A A G A T C C C C G A A A T A G G C  
T G C G C T A G G A G A A A A C A G T A A A A G T G C A C A G G G A A A T A T T T T C C T A A A G C A A C A A A G A A G G A G G C T A C A  
T G T T G G G G A A G T T G T G G A T A C C C A A A A A T A T G C A G A G A A C A A G G A T A T T C C G G A G G A T G A T C C A G A A T C G  
A A G A A A A A A T G G T T T C T A A T G G A G T A T A G G A G T C T T T A A G T T G T G C A A A T A A A T T T T T G T A G T A A G G A T T  
G T T G T C G A A G G C T C T G A G A A A A C G T G T A A A A C T T T T T G A A A A T A G A A G A A A G T T T T T G T A G A T G G G A A  
T A A G A A A C C T C G G A A G A A G A G T T G A A A G A A G A T T C T T T T A A C A G G T T A T A A A T A G T T A G A G G G A G G T A A  
T G T G A T C G G G G G T A G A G A G G T C G A C G A G A C G C G T C C C C G T A A A T A A G T A T T T T G A C A A A A G C G T C A A A A G A  
G G C A A A A A T A T G T G T C C C C A T G A A G A T G T G A T T G G A T G A A G C C T T T A C C A A T T C T C T C G T A G C C A G T G A  
T C T G T G T C T G A G C T C G G C A C C A G A A T C C A T C G T T T T G T C A T G G G A G T T T G G T T G A T A G A G A A C A G A T C T T  
G A G C A A G T T T A G C C A G C A A G A C T T C G G G A T A G T T G C T A A A C G T T G C T T G G C T T G G A T A G T T C A T T C A T  
C G G T T T A C A T T C A T G G G T A T T A T T G C G A G G A A A C G A T C T T T C C G T G C A T T G G T C G T T A C A C A T T T T C T T A  
C A A T T A T A A A T G A C A A T C T C T A T A A G T T T C T T T T A G T T T T T C C T T G T T A G A G G A A A A C T T T G G A A G A  
A A A C G C T A A A A T T C T G T C T T T A G T T A G T T T C T T T T T T G C T C T C C C G T A C A T T T T G T T A G C C C C T T T T C A  
G G T A G T T T T G G C A G A T A G T T T T C A A A A G A G A A A T A T T A T T T T A T T C A C T C G G G T C A T C G A A A T C T T T T G T G  
C T A T T C T A G G A G T A T A T T T C T T C C A C A T C C A T T C C G T T G T A G G A G G A T A T T T T G T C T T A G T A T T G A T G G C  
T T G C A T T C T G C T A T T T T C G G C C C T G C A A A A T G G G A A T A T T A C C A G A G A T G C T G C C T A T T G A G G A G C T A  
T C C A A A G C A A A T G G C G C A A T G A C A G C A G C T A C C T A T T C T G G A A G T A T T T T A G G G T C T T G T T T A G C T C C T C  
T T A T G G T G G A T T T A C G A A A G A T T T T G T C A C A A A T A G T T A C G A G T T A T C G G C C T G T T T C T G T G T A G T C T C  
T T C T G T T T T A A G T T T A T T T A T T G C G T T A G G C A T T C G T G C A A G T A A T G T A A A A A A T A A A G G A C A G A A A T T  
G C T T A T G T A A G C T T T A G A A A T C T T T G G C A G G T C T T C A A G A G A C G C G C A A T A T T G C T T A T C T G A T G A T T T  
C C G T A T T C C T T G T T G C C T T C T T T C T T T T T G T T G G G G C C T A C G T T C A A T T A C A A A T C A T T C C T T T T G T A G A  
A T T T A C T T T A G G A T A T T C A A A C A T T A T G G C G C G T A T C T A T T T C C T A T T G T A G C A G T A G G T A T G G G A G T T  
G G C T C T T A C A T G G C A G G A T G G A T T T C T G G A A G G A T A C A A A T T A G G G T T T T C T C C A T T A G C A G C T A T T G  
G T G T G G G C C T T T C T A T G A T G G T C C T T T G C T T G C T G T C C T T T T C G A T C A C C G C C G T G C T T A T T T T A C T C T T  
T T G T T T A G G C C T T G T T G G A G G A A T T T A T C A G G T T C C T T T A C A T G C C T A T A T T C A A T T C G T C A G C C C A G A A  
C A T A A A A G A G G C C A G G T A T T A G C T C T C A A T A A T T T C T T A G A T T T T C A G G A G T T T T A T T A G C T G C C G G A T

TTGTTAGATTATTAGGTGCTGGTTTCGATTAAACGCCCGATCAAAAGCTTTTATATATGGGCTCCTTAGT  
TGTTCGCTGCTATACTTTCGCTGTGGATGTAAAAGAGCATGTGTATCGTCTTCTGCTTACTCGTGT  
TTAAAAGACAAGTGGGACCAGCTTCTCTTCTCCCAAGGCTGAAGAAGTCTGGTGCCTTTTGTGCCCCG  
CAACCTCCTATAAAAGACGCGACGTATTTAGCATTATTCCCTAAGACCGTAAGAAGCTGTGTGTTTAT  
TTTAGATAAAGCTCTGCAACCAGGATGGACTTCTTAATAATACCGCATTGTGTGCCTACTATTTCTCT  
TATGGCGTGAAGGGCAGGCTTTTCGCAATGGATCGATCGGCAGGTGGTAGAGGTTAAGGCGTTGTTGA  
AGAGACAACCCTCTTTAAGGCGTTGTATGTCTTGGGAATCAAGCGCAGAGTCAGTCTTCTTTCTCAGTT  
GCAAGCCTCAGGATTGGCTGTGCAATCGGGGACATTAGTTCAAGATTCTGAACTGAAATATTCTTTCAT  
TTAGCGAACTAGAAAAGAGTGTGGCGCGTAATTAGGTGAAGTAACTTTGATAGATTTGTCTCCAGCGCAC  
ACTTTTCAGCTTCTCTTTCTAGCAAAAGTCTTCTATCACAGCTAAGGGCTGCGTAGCAATAGGCGAATT  
TCTCTATCTGTTAAGCGTAGTAAGACCCAGAGAGGTTCTATACCATAAAGTTTTCGAATTTTTCCTTG  
CTTTACGAAATAGGATTTGTGTTCGGAATAAGCGAAAAGAAAAGAACATATTAGGAGCAAGAATACAAGA  
AAGGCCATCCAAGGAAACCAAGGGAAATAAAACGCTCAAAATAAACGAAAACAAGAAAATGCGTT  
TCTCCTGCTGATCGGAACAGGGGACCAAAAAGCGTCTCAAAAGTGTTAGAAGTGCTGTATGCCAAGA  
CCTCTTCAAAGATCGGTTCTATAAAAATTTTCATACGCACAGCATGAACAGCTTCGTGAGACAGCACTTCTTC  
TTTGGAAGAAAACCAAAACAGAAAAGAGCTTTTGAAAACCTTGCCTAGTTGAATCGACACTCTGTTA  
TCGGTGATCCATGTACATCCCGCTTCCAGGCATCTAAACTTTTCATTAGAGTACACTACCTCTAAAAGAG  
AAGGGTTCACATCGAAGAGTTTCGGAATTCTATGGGAAAAGGGTGGGATGTACAGGAGCTTCTGCTAA  
TGTCCTTTCTACCCGAAAGAAAAGCTTGTTTTCCTTTCAGGGCCAGCAAGGAATCCTTCCTTTGTTT  
AATTGTAATAAATCATCGTAAGGATCCGAAGAGGGGGAGAAAGAAAGAAATTCAGTGTATTCAAGGCTG  
CTCTCAAAAATGTTGGTCTACAATAGGAGAAAGGCTCCGGATCTGCTTTTGAAGAGATGAGTTTCGAGAC  
TTCACCATACGTAAGTACAGGTTTTCGCAAAAGAAAGCGGTGTCGAATAGGTTGATGAGGAAAAGAT  
CTTGAATAACACGAAGAGTTTACGTAATTTGTGGGATCAAGAGAGCAAAATGTCCTTGACATTTTCCTGAG  
ACCCAATATCATTGGGTCCCGGAAAACCTCATCGTCTGCAAAATCTTGCTTTAGCAGGCAGGTTTGTGA  
TGACAAGAGCTTTTCACCTATAAGCTCTTTTGAGAGCTTTCTTGAAAAGCTTGAAGAGTTTTCCTCGCA  
GTTCTTCTGTCAATTTTTATCGGCGATAGGTTAACACCCCGTTTAAAGTCCCTGACAAGGCTTCTCGTT  
AAGGCCTTACGATATAGGATCGTGAATAAAAGTTTTGGAAGAAGCTGAGTTTTCCTATGTTGCTATTC  
CACAAGCGCGCTTCTTCCGCTCTTCCGAAGAGAAGAGCGGCCTAGCTCATCAATGCGAATAGCACCTGGG  
CTCTGCTTCCGATAGTATGTCTGAAGTATTGAGAAGCTCTTTTTCCTTACGAATTATAGGATACTTCTGC  
TTCGTTCCAGGAAGTCTTCAAAGAAAACGGCTCATAGGAAAAGAAAACAACATTCTTCTCAATGTTTCTGC  
TGTTTCATTAACAAGAAAGTGGGTGTGAAGAACCGTAATTTTAAAAGAAAGAGTCATTAGAGAAAAGCG  
TCCTCTGGAAGGAAATAAAATCAATAAAGTAAAAGAAAGAGGACTAATATAATCGTATAAGAAAAGT  
TTTTTTTTTTAAAAGAAAGCTTTGTGCGAGAGACTAAGATCCCGCTTATTGGCATTGTGTATGAAAAA  
TCCTAATCATTGTGAATCCCAGCCAAGATTAACCTTTCGTAAGTTGTTAGGAGAAGGGTTTATTT  
TTGACTCTTCTTGGGGCATATTGTTGATCTTCTGCAAAAGGGTTTGTGATTGATATTGAAAATGGATT  
TGTTCCGACTACCAATTTTAGAAGGGAAGGAAGAGGTTATTTCGAAAATTTGCGCCGAAGCGAAA  
TGTGATGTAGTTATCTCGCTCCCGATCCAGACCGAGAAGGAGAGGCTATAGCATGGCATATCGGAATC  
AGCTGCCTAAGGATACATAAATCAACGTATTTCAATCAATGCCATTACCAAGGAGCTGTTACCGAAGC  
TTTGAAAGCATCCTAGGAAATTTGATATGGCGTTGGTCAATGCACAGCAGGCACGACGCTTTCTAGATCGC  
ATTGTGGGATACAAGATCTCTCCGATCCTAGGTCGCAAGCTGCAACGTTGGTCTGGGGTTCTGCAGGAA  
GAGTGCAGTCTGTAGCTCTAAAATTAGTAGTAGATCGGGAATATGCTATAGAACGATTTGTTCCCGTCGA  
ATTTTGAATATCCGAGTGCATCTTAAAGATCCTCAAACCAAGACATTCTGGGCTCATTTCGATTCC  
GTGAATGGGAAGAAATGGGAAAAGAAATTCCTGAAGGGAAGACTTCTGATGAAGTGATTTTAATTGATT  
CTAAAAGAGAAGGCAGATGAGATTGTCGCTCTATTAGAATCAGCTACATATGTTGTAGATCGTGTAGAGTC  
TAAAGAAAAGAAACGTCACGCCTATCCTCCGTTTATTACTTCTACGTTGCAGCAAGAAGCTAGTCGTCAT  
TACCGCTTTTCCTTCCAGAACGATGAACATAGCGCAGACTTTATATGAAGGGGTAGATTTAGATAGTC  
AAGGTGCTGTGGGATGATCACATACATGCGAACCGATTCCGTACGTACGGATCCTGAAGCTGTAAAACA  
GGTGCGCAATATATCGAAGGTCATTTTGGAAGGAATTCGTTCTTCTTCTCCGAACGTTGATGCCACG  
AAAAAATGGCACAGGATGCACACGAAGCTATACGTCCTACAGATGTTACAATCACTCCGGAATCGATAC  
GCAGTAAGTTAACGGAAGATCAGTACAAGCTGTATTCCTTGATATGGAAGCGTTTGTTCATCAAAAT  
GATATCCGCGATTTACGATACACTCGCGATTTCGATTTACGACGAAATAAGGATCGATCTGCGTGTACA  
GGCTCTTGTTGAAAATTTAAAGGGTTCTTAGCTGTTACGAAGAAGAAAGAGATGAAGAAGGGGATGAAG  
AGAAAACATTCATCTTCCGAAGCTTAATGAGCGAGATGTTCTAAAGGAAGAGTTAGAAGCAGAACA

ATCGCATAACCAAGCCTTTGCCGCGATTTACAGAAGCTTCTTTAGTGAAAAGAACTCGAGAAGTCAGGAATA  
GGGAGACCTTCTACCTATGCCACTATCATGAATAAAATCCAGAGTCGGGAATATACGTTGAAAAGAGGGC  
AAAGGCTACGTCTACTGAATTAGGAAAAGTAGTTTGTCAGTTTTTAGAAACGAATTTTCCTCGTATTAT  
GGATATTGGTTTTCACCGCTGGCATGGAAGATGAGTTAGAAGTATTGCTGATAATAAAAAACCTTGAAG  
CAGCTATTACAAGAATTTTGTGAACTCTTTCTTCTTTTGTAGTCACGGCAGAAAAGAGGGCCTTTATCC  
CTCGTATTGTGACAGAAATAGATTGTCAAAAATGTCATAAAGGAAATTAGTAAAAATTTGGGCTAAAA  
TCGCTATTTCTTTGTTGCTCCGAATATCCTACTTGCAGACTATAAACTTCGGAAGAGGAGCTGACGTT  
GACAAAACAGGATATGCGGAAGATACTCCTTGGGATGCACCCTGCGCTCTGTGCGGAGGAGAAAAGAAAG  
TCCGGCATGGGAAATTTGGAAGTTTCCTTGGCTGCGAGAAGTATCCGAAGTGTCACTACATTGTTAATCT  
TTTCAAAAAGGGGAGAAGCTGGGGCTGAGCCTGAAGCGACAGTGCATTGTCTTCGAGAAGGATGTACAGGA  
CACCTTGTGAAAAGACGCTCACGATTTAATAAAAATGTTTATTTCTTGCTCCGAATATCCTGCATGTAGCG  
TGATTGGTAACTCTGTAGATGCTGTAATTGAAAAGTATGCAGGAACGCCAAAACTCCTTATGAGAA  
AACAAAAGCGAAAATAATCAATAGCCTCTACCAAGGGAAAGGCTGCAAAACAGTGAAAATAAGCTCAGCA  
ACAACAAAAACGAGCTACAAAACGCTACACACCTTCTGCTGCTTTAGCAGCGGTGATTGGTGCGGATC  
CTGTAGGGCGTCCCGAAGCCACTAAGAAGCTATGGGAGTATATTAAGGAAAAGGATTGCAATCCCCTCA  
AAATAAAAAAATCATTATTCCTGATAGTAAATTTGACAGGGAGTGATAGGAGCTGATCCAATCGACATGTT  
GCGCTATCTAAAATAAATAAGCGCGCACTTAATCAAGGAAGAGTAGGGGC TTGTCATGACTCGGAATAAG  
AGGATTATTCGAGAGAAGCTCCTCTTCTTCCGTGAGTTCTTCAAGCCGTCAATCAGTTGATACACCTC  
TTGTGATGAAGACGCTTTAGCTAAGTTGGCTCGTAGAGAACGTACTTTAGGAGAAAGAAATGAGGTAATGC  
CCACACAGTTTACGAGTATCTGTTAGTAGCTTCTCTTAC TTGATAAATACTCTTCTATCCATTGTAGAT  
GCTGTACGAACGCTGTTTCTTTGTA GAAAAGATGGAGAGGAGTAGGTCCCTGTAGTTAGGTAATCTTC  
TATTTGTTTTCGATCCAAGGAGCTCCCATAGTACCTCGAGCAACGAGGACACCATCACAATGCGTAGTC  
TCTAGCATCGTT TTGCGGCTTCAGGGGAGAAAACATCGCCATTCCCAAACTACTGGGAAATCATCACCAG  
CGGCTTGT TTGCTCGA GAAATGAATTCGAAGTTGCTTGGGCTTGATATCCTTGGGAGCGTGTCTTCC  
ATGTA CAAGACAGCACTGGCTCCGC TTTCTTTAATGATGCGGACAGTCTCTTCCACATTGATGTGGTCG  
AAATCCCATCCAGATCGAATTTTGACGGTTACCGAACG GAAACCCTTCTACCATCTTCTCAACCACCT  
TCCCGATTAATTCAGGGGT TTTAAGCATGCCTGAACCGCTCCCATCTTTAGTAATGCGATCGGTGGGGCA  
TCCGCAGTTAAGATCTATAAGATCAAACTCCTAAGCCTTCTAAAATTTTGCAGACTCTCCGGCAAGGTCG  
GGACGCTGCCACAGAGTTGTCCACCGATGGGACGCATAGATTCAGC GAAATCGAGTAGGCGTAACGTGC  
GTTGAGGACAATAATGGAGGCTTCCATT TTTACCA TTTACAGAACATCAATGCGGGCCGATATTCAGC  
CGACATACGACGGTAAGG GAAATCA GAAAATCCTGCTAAGGGGGCGTAGACTACGGGAGACTTAAGAGGA  
AGGTTT TTTATAAA TATTGAAGGAGCCATGGTGATT GAAAATAATTCAGAACAAT GAAACGTACGATTT  
TAGAATCATAAAAGGGCAAAACTCCGAGACAGAGGAGAGCGATCATAGGGCTGATGTCAATAAAACCTATA  
CGCGAACGAATTTATGGAAGATACGGGAGATAGGAGATACCCAGCGACGAATGATACGATAACCACTGTG  
TATTGTGGCATTCTGGCAGCCAGGAA CAAGAACG TAAACCAAAAT TAAAAACTA TAAATATTAACCGC  
AGTTCTAAG TAAATAAGAAAGCATTTAAAAAACTCTGTTTATAATTAATTAATGTTTTCCTT GAAAAGA  
TGTT TTTATTTT TTTAAAATGAGCACTCTCAT TTTAAAAAGATAAAGAAAAACGC TAAATGGATTTTAAG  
CTGCCTATTTACTGCATAGGGGTAACC CAAAGTGCAGAAAACGTTACCAGGATAGCAAT TTTACAGAAA  
CCTG TAAAGGGTGGTCTCTGTGTGCTTGC GAAAAGCTTACC GAAACAGGCGGTTGTCTTGGC CAAAACG  
ATTTCTTTCTTCAAAGGTAGTTTATCCTTACAAGGACAGGAGACTTTAGTAAAAGTGTGAGCTCTTCT  
TTAAAGAGCAAAAAGAATTT TTTAAA AATGGTGTATGCGGAGCAAGAAGCAACCGCAGCATTTCCCTTGA  
AAGATTTAGTGATTGCGCATGATTTAGGAGAGTGGAAGTACCGGCTCAGGAGCGCGTAGTAACACTATGGAT  
GTTA CAAGACAATCTGTTGCGTTAGCAACAGCTCTCTTGGAGGAGAAGGGGGGATTTGCTACGCACATT  
TCTTGTGCGAGC CAAA GATCTGT TTTCTGCATTGCAACAGTCTCTTCTTCGCAATCTAGAGACTTATTTT  
TCGTATACGAAGGTCTTGATGAGACAGTCTGTTTATTTGTGCAAGAAGGCTCCGTATTACTGTCTCGTTC  
CTTTAAA AATGACTCT GAAAGCTTATTAGACGATTTAATTAGCTTCTTTTGCATACGTTCAAGAAGTATAC  
ACCGCTCT TTTATCAGAGATCCACGGCGCTTATCTATCTAGTTTCGTTACGTACTTTGCTGAGCCGTCGGG  
CTGGGTTCCCTGTGATCATCAGTCT TTTATTTTC CGAGCTCTCTCCAGACCAAGAAGTGTATCGTGATGC  
GGTGGCTGCCGC TTTCCAGGGAGTGCCTAGCTGCCATACTTG TTTCTCTTACAGTTGGGGAGATTTCTCT  
CGGAAGGCATGTAGCTATTGGAT TAAAAAAGGTTGTGGAGCC TTTCTAAA ACTCGCT TTTGCCAGCGCGC  
TGGCTATATTCATAGGCGGGGAGTAGAGTCACTT TTTAGTCCA TAAAGCACAAACAGATA TTTAGAGA  
GATCGTCTCT GAAAAG GAAATAACCCGTGTC TTTCCGGTCCGCACAGCAGGTAGT GAAAAGAGTCTGTGAT  
TCGGACCACAGTTGGGAATATGAATACCTCCCTACGGTACCCACGAATCAAGAAGTGATGGAAGTGCTTG

GACGAATGACTGCGAATCTCCCTTCCGTTTCATTCTCCCATTA TTTGTATAAAA TTAGAAGATATTCCTTC  
CGAGGAGCGTCC TTTAGGGGGATATCGGGCTTATA TTTCTTACAAGGTGCAGCTAATGATGAAGAC TTT  
GCATCT TTTATAGATCAGTTATCAGCTTGATCGGTGCGCGTGTTC TTTCTAAA AAGCTGGCAGATCGCC  
AA TTTGATGTACGAATCGCTCTGCAAGGGAGGGGATAATGCGACGCTTAGGAGTATGGGTGCTGTTACTA  
TTAGCGAGTGGGGCTGCTTCTCTTCTGCAATAGGAGCATGGTGTGGCGTCAGCGTACAGCAGAGGCTT  
GGGAAA TTTA CT CATCGATATGAGAGAT TTT CAGTC TAAA CGAGAGCGATCTTCTCAGGTAGCAATCAA  
GAATGCGCGGCT GAAA GCAGCGCA TAAA CAAGCGAG TTT CCCC AAT TGGATTGCCAAGGAGAGAATCTC  
GT TTT C TTGAATAAGGAGCGAGATGCTCTAGC TAAA CTTCTGCAACAGCCTGGGTGGTGAGAAGTCGTG  
CAGTCAAGGATCGGAAGGC TTT C TTAGAAGATAACCGCTTGTCTATGGCAGGAGCAGAC TTTA AGGAGA GAA  
AAGCACGTTGT TTTCTTTCCAAA AAGAGCTC CAAA TAGATGACGAGGACATTCCTGTATTATTAGGATTG  
TTTG ATCCTAAGTATACC CAAA TACCATTGTT TTTCTTTCT TACTGG GAAA TGACGAAGCAGGTGTCAT  
CATTAG GAAATGAGGTGTGGGTGTTACGCGGAGGCTTGGGGACGATGTGTGTAAGTAGAAGCTTAAGA  
TGGTG TTTATGT TTTCT TTTGCTGTGCGGATGGGTGGACGCTGGGG TTTATGATAAGCTCCGACTGACAG  
GCATTAACATTATCGATAGGAATGGTC TTTCTGAGACGATCTGTTC TAAAGAAA AATTA CAAA AGTATAC  
GAAA ATCGAT TTTCTCTCTCCTCAGCCTTAC CAAA AAGTCATGCGTACATA CAAA AACGCAGCAGGCGAG  
TCGGTTGCTTG TTTA ACGACGTACTATCCGAATGGC CAAATCCGACAATATCTCGAGTG TTTAAA TAATC  
GTGCT TTTTGACGTTATCGTGAGTGGCATAGTAATGG CAAA ATTCATATCCAGGCAGAAGTTATTGGAGG  
GATAGCAGAT TTTG CATCCTTCCGCAGAAGCCGGATGGTTGTTGATGGAACAACGTATGCACATGATAGC  
GAGGGGCGGTTAGAAGCTGTTATTCATTAT GAAA AAGGCTTGCTGGAAGGGA TTT C GCTGTATTACCACG  
CGAATGGGAATGTATGGAAGGAATGTCTTACCA TAAAGGTGTGCTCATGGAGACT TTTTGGTCTTCAC  
CGAAGAAGGAAG TTTG T TAAAGAAACAAA CTT TTTGTAAAGGGCAGTTGTCTGGATGTGCATTACGCTAC  
GAGCCAGGTTACAGTCATTGTTGTGCAAGAAGAATA TAAA CAAGG GAAA CTGCGCAGTGG TAAA TATT  
ACGATCCTCTTACTAAGGAAGAAA TCGCGTGCCTAGTGAATGG CAAAGG TAAA CAAGTAATTTATGGGAA  
ATATGCGATTATAGAGACCCGACAGATTGTACATGGCGTTCCTCACGGGGAAGTCTTGTATT TTTGATGAA  
CATGG TAAATCTCTGTTGCAAGCATATTCTCTAATCAATGGGCAGAAA GAGGGAGAAGAAGTATT TTTCT  
ATCCAGGCGGAGAAGGTAGAAA AATGTTATTAACATGGTCCCAAGGCATTCTACAAGGAGCTGT GAAAAC  
TTGGTACC CAAA TGCGC TTTGGAAA GTAG CAAA GAACTTGTG CAAA TAAA AAGACTGGGATTCTCATG  
CTATACTATCCGAAGGACAAGTGATGGCTACCGAGGAATATGTAGACGATCTTCTCA TAAA AGGAGAAT  
ATTTCCGGCCGAACGACCGATATCCATATGC TAAA GTG GAAA AAGTCTGAGGACAGCGGTCTT TTT CAG  
TGCTACAGGAGGATTGT TAAAGAAA GTCCTCTATGAAGATGGGAAGCCTGTTATTATTAGACAT GAAA  
ATATTGTAGAGCAGAAA CGTTGT TTTG CGACGAGAAGGTTAGCGAAGCGGAGCAGC TTTCTGTCCAGCG  
CAGAGATGAAGCAGCTCGTGAGCTGATGCAT TTTG TTATGCAGACAATCCGCAAGGC TTTG TGTATCC  
TATATTCCT TTT C GCTCAGAGTTGGATGTTTCGAGGGATCAATGCATGGTTAGCGCAAGAGAACC GACTCC  
TCCTACC TAAA ATGCAAGGGATGGATATCGTTCCGATAGCTCTTCT TTTA CCAAGATAGAGAGCTGTA  
TTCTCC TAAA GATTTG AATCAGATAGAAGGAGAAGATCGAGGCACAACAGATTGCAGCGGCCCTTGATT  
CCTGCGATAGTC TTTG ATCAGAACAAG TTT C G TTTA GGATATGGCGGAGGCTACTACGATCGTT TTTGT  
CTAAGTATCCGTATA TTTG GACAATAGGCGTGGGA TTTAAA GAGCAGCTGTTGGCGTATCTTCCAAGGGA  
AGAGCATGATGTTCCCTTAGATCAGTTATATCTCACT TAAA GAGCTGT TTTA CGTA TAAA AAGCTCCCTC  
CTCT TTT C TGCATCTGCATTCTTTT TTTGAAA AAGAGGCCTC TTT C TTGTACTCAAGAATAGAGAGAA  
ACCTCCATTCTAGA TAAAAAAGAGTGTAGTTTT TTTGAAA TTCTAGCACTTGACTGTTGTCT TTTGAAAT  
ATTG CAAA CTGACGCCAC GAAA TATAAGAGGTGCGCAGATGGCAACCTCT TAAA GTAGAGTCTTCTAGACA  
GCGCAACAAGGGAGTATACATGAGCGTTCGACC GAAA AAGGGC TTTGGAAGCGGCCATTGCTTATATC  
GAAA AGCAAT TTTG GCGCAGGATCTATCATGAG TTTAG GAAA GCATCTTTCAGCTCATGAGATATCAACTA  
TTAAA ACAGGTGCATTGTCGTTGGA TTTAG CCTTAGGAATAGGCGGGTTC TAAA GGAAGAATGTAGA  
GAT TTT C GGGCCAGAGTCTTCAGG GAAA ACAACTCTAGCGACGCATATAGTGGCCAATGCT CAAA AGATG  
GGAGGGTGGCGGCTTATATTGATGCCGAGCATGCC TTAGACCCGAATTATGCTGCGCTTATTGGAG CAA  
ATATTAATGATTTA ATGA TTTCTCAGCCTGACTGCGGAGAAGATGC TTTGAGTATGTCAGAGCTCTTAGC  
GCGTCTGGAGCTGTCGATGTGATTGTGATTGACTCGGTAGCAGCATTAGTTC CAAA GAGCGAGTTAGAA  
GGG GAAA TTGGAGATGTCCATGTTGG TTTG CAAGCTCGCATGATGTCGAGGCTCTACG CAAA TTAAGT  
CAACCTTAGCACGAACCAATACTTGTGCCAT TTT C ATTAACCAGATTCGGGA GAAA ATAGGTGTGAGT TT  
TG GTAATCCAGAGACTACGACTGGAGGACGTGCACTGAAGT TTTA TTCTTCGATTGCTATCGATATTCGT  
CGTATTGGCTCCA TAAA GGGAGGA GAAA ACTTCGATATAGGGAATCGTATCAAGGT GAAAGTAG CAAAA  
ATAAAA TTAGCTCCTCCATTCCGAAGTGCAGAA TTTG ATATCTTG TTTA ATGAAGGGA TTT C TTCCGACG

GTGTATCATTGATCTCGCTGTCGAAA AAAATATTATCGATAAGAAA GGATCGTGGTTCAACTACCAGGAT  
CGTAAGTTAGGCCAAGGTCGAGAGGCGGTTTCGAGAAGAGCTGAAA AGGAATAAGGAGTTGTTCCACGAGT  
TGGAACGCCGTA TTTA TGAGTCTGTACAGGCTTCACAAGCTCCAGCGGAGCTTGCCTGGATTACAGAGTC  
TCGCGAGGTAGCAGAGGCTGC GAAA TAGAGGGTGTATCCCTATCGATTCTAATCAAGGAAAAGAAGTT  
TTC TTTCTTTCTTGGTAG TTTCTTTCTCCCCGTC TTTGTTGTGGTTCTCTACATAGGTTTG GTAATT  
CCCGGAAGCTGTAGAGCCAATTTCAATAATTTTCTTTGAAAGGC TAAAATTT TTTG GTG TAAA CTCCACG  
GATC TTTG GTGTGCGACTTCTTTA TAGTGTTGAGGTTAGATAAAA AGAGACTT CAAA GAGTAAGGCACCTA  
GAGATCAAGCAT TTTAACGAGCGAGAAGGC TTTG TGGTTCGCGT TTTCTTTGTTAGTGGTTTTCTCC TTT  
CTTG TTTCTCTGCAGGCGGAAGATCATATGTATTT TTTCTTCGAGAGACGATTCCTCATCGCATTATGA  
TCATACACATCGAACTGTTGCAAGATTAAGAGAGGGAAGTACCTTGTGAGAAGGTC TTTCCATGGAACAA  
GAGCAGATGTA TTTA CTGTGTTGTCAGGGTTCTCGTTA CAAA TTCAAAGAAA GTTTCAAGAAT CAAAAG  
AAA TTT TTTCTCGCATTGATAAAA GAAA AACTTCTGCACCT TTTG TTTTG CAGCGTGAGTTGTTAGAAG  
GCGGATTCCTCAATGCCATTT TTTAAA TAACC TTTCA TTAATGGCAGAATGTATTGCGGAATTA GAAA GG  
GTATCTGGATCAGAAGCTCATCT TTTA TTT TTTAAA GCGTTACATGCACATCGTAC CAAA CAATATAATC  
TTGCGGTGGATGTGTTATCCCGGTGG TTTGGGCATGTAGATCAGACTAAGCCTC TTTGTTTAGATACGAA  
TGCTATGAGCTAT TTTCTCCTTATGT TTTAGAAGAGATAGCAGCT GAAAGCCTGATAGGTGCCAGAAGG  
TATGCGGAAGGGCGAATCGTTATTAACAGTAT TTTCAA CAAA ATCT TTTCTAGAGAATATGCTTGGTCTG  
TAGACATGTATAACCGTTGGTATTAATGCTAGGACAGAGCTACCTTCTGGAATTACAAGAGGGGGTGC  
TAGCGA TTTACTTCCGGAGTATTAT GAAACGATTCTTT TTTA TCAGAAG CAAA T GAAAGGT TTTGATGCG  
GGAGCATA CAAA ACCT TTTCCAGAAA GCATGCTGTTTCTACGATCATGCAGCATATTTTTGTCATAC  
CAGAAA CGCAGCTCC TTTGTTT CATGGATGCGTTGTTAATGTGG GAAA ATAGCTATGTCCATCCGACTA  
TTC TTTAGTCTTAGAAA GGATGAAA CCGCTGT TTTA CAAGATGGTATACATACG CAAA AAATCTGTTCAG  
GCAATTGCCGATT CAAA AAT CAAA AAT TAAA AGAAA AACTGATAGAGCTGTT CAGCGATGAACTCGTTT  
TTTG TG TTTCTCAAG GAAACACAGTGTGCGCTGACCAGTACTTAGCTCTGTT GAAA ACCTAGATCCTCG  
CTCTCTTGGGGGCATAAGTTGTTAC TTTCCGAGAAGGAGATTGTGAATATGG TTTGCGAGGATGATGCA  
CAATACTCGCGAT TAAA AGACTATCTACTGTTATGGGAGGAGCAAGATATCGCTGATGTGATCGGCAAC  
AGTTAGTGCATTATCTATTCTTCACTGCGCAAGCA TTTA TGAGAGAGGAGGCCAGGAGGAAGCCTGCCTACG  
CCTCT TAAAGGAAA TCCTATTAT TTTCTCAGAATGAGAAGGCTGTCTTAATCGCACGCTTCGCTCGGTT  
AAGCATT TTTA CACCAGGCTTTAGCTATGCGGAA TTTACGCA TTTAGTGTGGATAGAGAATTT TTTAG  
ATGAGTTCGGATTGCCAAGACTCTAGCTAGCGATGCC GAAA TTGCGAATTG TTTAGCAGATGCGCAATA  
TCTTT TTTCTAAA GCGGATTATCGTCTCTGTATTGTGTATAGTTCTTTGGCTGGCGGCTGTGGCTCCTTCA  
ACAGAAGCCTTGCAACTACTTGGGTTAAGCTTAGTAGAG CAAA AAGAATACACGGAAGC TTTGGAAGTAT  
TTC AAA AGCTTCC TTTAGGGGAGGATGCTTGGAAATCCCAAGTACA CAAAGCTTCTCT TTTGTGCTA TAA  
ATACATAGCACGACAG CAAAA GAAA AATCT TTTCCGTGAATGTAAA TCAGCACGTTCAAGATATGTAC  
CATC TTTGTTAGCACACATATCTTCTCCCT TTTGATATAGCT TTTGCT CAAA AGCA TTTATCCCAGGA  
AGAG TTTAGTCAGGAAGCAGAAGC TTTCTTAGCTACAGCATCCGCATTATTGCGTTGTGGTTATCCTTAT  
TTTCTAT TTTGTGATGAGACGATTCATCCACGCTCCAGGGA TTTCAAATAAA CAACTCTTCCAATGGT  
TCCAGCTGTTGTATCCCGCATAAA AGAAGAACTG TTTGAAGTTGTTAATCATAAAA TTTATCTACGCTC  
ATTA TTTCTTTTA CGGGAGAAGGTG TTT CATAAAA TTGCATAGATTGGCGGGAGCCGTTCCACGTACACC T  
TTAATTT TTTGAAGAGATTGCTCTGCTCTCAGAAGAGCAGAACCAGGTA CT GAAA ACTGTAT TAAA TTCTT  
GCTTCTCTCTCG TTTG TGGAGGACCAGGAACAGG CAAA ACATT TTTAGCTGTT CAGATGATTCGGTTGAT  
ACTTGGC CAAA TTCTT CAGCGCAGATCATGGTAGCTTCTCCAACGGG GAAA GCTTCCGCTCATCTGCAT  
AGCGTATTAACGTCTCAGGGAATCGTTGGAGATTCTGTAGAAGTCGTTACGATTCA TAAA ATTT TTTAAAAG  
ATATGCGTAGAGGGCGCTCCCCTGTAGATCTACTATTGGTTGATGAAGGCTCGATGGTGACCATGAATCT  
GTTACATGGACTGAT TAAA ACCATACGAGGAGAATCCCAGGG GAAA CGATCTACGCAGATAGAATGGTG  
ATT TTTGGGGATGCGAATCAGC TTTCTCCAATAGGTATTGGAGTGG GAAATCCT TTTCATGAAGTAGTGT  
CTGAGT TTTCTAAA CAGGCATGCT TTTA TCTACCAGCCACCGAGC TAAACATAAGGAATTACAGGAATT  
AGCGAGCGCTGTTCTGCGCAAGGAGCTGATTCCT TTTCAACC TTTG CCTTCCCAGACAAGAAGCTATTCGG  
CGATTGTCT TTTGCT TTTACACAAGCAG CAAA AGAAGGGGTGTCGTTATGTGC TTTGACTCCGATGCGCC  
AAGGAC TTTGGGGT TTTTG CAGTTGAATCGGTTGTTG TTTA ATGAGATGCAGGA GAAA CATCCACGGC  
ACCTATTCCTATCATCGTGACA GAAA GATAT GAAA CGTGGGGATTAACGAATGGAGATACAGGAGT TTTA  
GATCCTGTAACGGAACAATTGCG TTTCATGAATGGGGAGATTCTGCATCAAGCAGAT TTTCCCTATTATT  
CTTACAACATATGTCATGTCTGTGCA CAAA AGTCAGGGTAGTGAATATGATCGTGTGATTGTTATTTCTCC



TAAA GGCAGTGAAGTC TTTG ATTCGGCAATTCTCTATACTGCAATTACAAGAAC CAAA CAACACGTTGAG  
A TTTGGGCTGATCGAGAAGC TTTA GAGGCGATCAT TTTGAAA AGAGGGCGTTATTAATTAGAGCTGGCAC  
ACTT TTTGCTCCTAG TAAA GATGAATGATTCCA GAAA GAAGGAGCGGACGTTATGGACCAGTTATCACAG  
ATACATCAAGAGCTAGCTCG TTTA GAA TTTATCAATGATCAACTGCAGTCG GAAA GAGCGTACATCCATG  
A TTTA TTGTGTGCGATAGGC TTTT CTGAAGGGT TAAA GACGATAGCCGCGATAGCTAACGAAGTGC TTTT  
CGAAGAAGATTCCAAGGTTAACTGGGC TTTA ACATATCCCGCAGTATCTTTT TTTT CG TTTT TATTATT  
AAGACCTGGGCGTTGTGCCAGGTCTTGT GAAA AACGGGACGGCATTAAAGAATTAGGA GAAA GAGTCTCC  
TAGATAGTGTGACGTACCATAGGA TTTG CCGATCATCTGAGCAGACGATCCTT CAAA GAAGAT TTTT CCG  
TCAATGATAAGGTAACAACGATCTGCGATAGATAAGAGTTCT TTTG CGTTATGGTCGGTAATTAAGATAC  
CAATACCGC GACTTGCCAGAAT TTTG ATTAGGTA TTTG ACAT TTTG AATGACCAGAGGATCCACGTTAG C  
AAA AGGCTCGTCTAG TAAA AGAACGCTAGGATTCAGAGCAAGAACACACGCGA TTTT CAATCGGCGACGT  
TCTCCGCCGATAGCGAGCCGGC TTTT TTATGTAGACTAGTAGTCAATTGAAGATCATCAATGAGAGCAT  
TTA ATAGGTGCG TTTG TTCT TTTT GTGT TTTA TAGATAA TTTT CAGAACG CAAA TTAGGT TTTT TTTAAC  
AGTCAGCTCT TTTG AAA ATAGTAGGTTCTTGGCTAGGTATCCGATTCCGAGGCGCGCTCGATAGTCCATA  
GGTTTT TTTG TAATATCTGTATT TTTG AACAGAATT TTTT CAGAATCAGGACGGATCAACCCTACAG TTT  
GATAAAA AAGCTGTGGT TTTT CCCCCTCCGTTAGGGCTAACAACCCACGAT TTTT CCGTGCATTGACTTG  
AAA GACACATCATTTGGTCAACAGG TTTT TTATTGTATTT TTTG ATGAGGTTG CAAA CGGATAGTACTGAC  
ATAAAA AAGGATTAGTT TTTA AG CAAA GAGAGAGAGAGGACT TTTT ATTCCGCCTTCAGCCATCCCTCTACC  
CAT TTTT TGGTTCGGCATCTGGAGTGTAAATAGA GAAA CAACAATTATACACGCT CAAA GAATAATC TTTG  
TAATTAAGAAGTCTCCAGTACCTC TAAAA AACATAGCGCGTTCCGCGG TTTT AG TTTG TAGACATCCTG  
TTAGGTGCGATAAGAGTTCTCGACAGTG TAAA CTGTATTGGG GAAA TGTAACCCATACAGGACTTATC  
TATGGTGCAATAAAA ATAATTGCT TTTT TGGAGAGATGATTCGCTTGGGACTCCAAGTTTTTTGAT TTTT  
AAA AATGGCGGAGCTGGTGTACGGAGTCTTGGGTACAAGCGTGGGATTGG TAAA ATCTCCCAT TTTG  
CAACCGCTAATGCAGTTACGCAAGCACATAATAT TAAA ACTACCACACACCAGATGCCAT GAAAA GAAA  
CTTCGTCATACAGAAA CAGCATCCA TTTT TTGAATGTAGGT GAAA AGCTGTACCCAAGCAGGAAGCAATC  
GTTT TAAA TCTTTT AAG GAAA GCATAGAAGCAGCATCACT TAAA GCGGATGATGGTTCCGGATGGG TTTT  
TATGAATAATCCTTGTACGCCAGCGCTATAGCAGAACGAGTTAGGACAGGGAT TAAA TTCCGCTGGCCA  
CCAC TTTG GCTATGTAGTGTCCCGGTAGTTGTACGGAATGAGTTCCATCGAAGACAACAGGGAACC CAA  
AGCGACGAAGAACCTCGATAGAACGCATATCAGAAA CAAGATTGTTGTACC CAAA AGAACAACCGCGCTC  
TGTTAAGATGAT TTTG TTATTTT CTGTGGACAGTAC TTTG TCAATAGGGCCTTGCA TTTT CCAAGGAGAA  
AGGAATTGGCCTTT TTTG ATATTAACGATCGCTTGGC TTTT CCCAGCAGTCACCAGAAGATCTGT TTTG  
GACA TAAA AAAGCTGGGACTTGAATAATATCACACAC TTTAGCAGCTCCCGTTCATCTGGAGAATG  
CACGCTGTAAAGA TTTT AACATCTAGCTCTTCT TTTA AT TTTT GCCAGTGT TTTG CAACCCGAGTCTGAGT  
CCGGGGCTCGATAATTGTGTACGGATGAACGATTTGGC TTTATCGTAACTGCT TTTAAA AATCCAATGAA  
CAGAAGAAGCATAACGGAGCAACAA TTTT TTTAATCGTCGCGCTG TTTT CAAA ACAGAGTTGTCTTCAAT  
TACACAAGGGCCTGCTATCAAGAGCAT TTTG TTTT CG GAAA CA TAAA AGGGTATCCTTTTTTA GAGTGG  
AATTGCGCC TTTA GTCAGAGTTCTTAACGATCTTCTCAGCTGACAGAAATTTG ACTATACACCA TTTG CG  
TTT GATTGGTACGA GAAA CCTTG TAAA ATCCTAGGAAGAGGGCTTT TTTAAA GAG GAAA TAGTGAATCCA  
AGGAATGGGTTATGGCAAGGATTCGGCGGATTAGCAG TTTG AACAAAGCATCTCAAGGAATAGAAGAAG  
AAGAGTGCTTCCA GAAA ATCGAAGTCTAAGGTATAGTATCTTCCAGCACTATGGGAGTG TTTT CTTGCTG  
TGGACCGATAGCTCAGTGGATAGAGCATCCGCCTTCTAAGCGGATGGTCGCAGGTTCCGAATCCTGCTCGG  
TCCGAGACACATGCTTCT TTTT CTTT CAGAT TTTA TCTCC TTTT TCTCGT GAAAA AACT TTTG ACTCAAG  
TAAA ATACAGAAA AATC TTTG TATTGGGGGAGTCTCTTGTATGGACACGCAATTCATAGCGAGTCCGGTCT  
GTTT GAAA CCAAGAAGTTACTTCTGT TTTT CAGG CAAA G TAAA AGAAGAGTTGATGTCCCAT CAAA TATGA  
CTTTT GAGGGCCAGTTCCGTTCT TTTA GACCAGTTGCGGCAAGCTCTTATCG CAAA AATGGGAGAACAGAA  
AGGGCAGGAGATGTACGACCG TTTT CATAACGTC TTTA CTGAT TTTT CACATTCACAACGGTTCA TAAAGAA  
ATGGATCGAGCACAACGCGCTT CAAA GAAA ATGCGTTCCGATACAGAGATTGATG GAAA ATTCGCTACTT  
CTTAGCACGACCCCTTCTCGAAGAAGAGGTGTGCAGGCTTGTAAACAGGAAGAATCTTTG TTTG AT  
GCCGA GAAA AT TTTG ATTCCGAT TTTG TTA CAAA CAAA CTATTTATTTAGC CAAA CC TTTA AGCAGATTTT  
CTATGACTCAGGAGG TTTG GAGTTGCATGTGCAACATGTGATAAG TTTA ATT GAAA CAGCAGTTCGGGAT  
TCTTACAGATCATGCCCGAT TTTA CTAGCCTGTGAAGCCCGG CAGGTGGTTCTTCTC GAAA G TTTA GAT  
AGT TTTG TTAACA TTTT TTAACGGTTCCGAAGGTTGAA TAAA ATCT TTTT CCGAACCGTATCATAGAAGGG  
TTTCAA AGACGAAGTCTGT TTTA AGGAGGCTTGATTCTG GAAA TCCCTGCTCCAACGGCTGTT TTTT

A**TTTG**TAATTGATGAACAATTAACAGGACGCCTTGATAAGGGGCTGGTCTCATATAATGGAGCGTATTCA  
CGAGCTT**TTTA**TCAGCAA**CAAA**TTGAGTTAGGGCGTGTCCGTGTTAATGGGCGGGTGTATACGCGTG**TTT**  
**CC**CATCCGTTATCCCTAGGGGATGTGGTAGAAGTGGAATTGATAGAAGAGGAAGAACCCTCTTC**TTTA**AT  
CCCGGAAGATATTCCTCTGGATAAAGTATATGAAGACGATATGAT**TTTG**GTCATTA**TAAA**CCAAGAGAT  
ATGGTTGTCCATCCTGCTCCTGGGCATACGCAAGGTACGGTGGTGCATGCT**TTTA**TTACAT**GAAA**TCGGAG  
AGCGTCT**GAAA**CAAGAGTTCCCCGAGGAGCCATGGCGCCAGGGATTGTACATCGCTTAGAT**TAAA**GATAC  
TTCCGGCTTATTGATTACGG**TAAA**AACTCGGCGAGCTAAGGCTC**TTTA**TAGTGAGCTT**TTTG**CTAC**CAAA**  
CAGG**TAAA**AAAGC**TTTA**CGTAGCCA**TTTG**CATTAATGCTCCGTCTCAGGAACTTATTCATACTCGGATAA  
CGCGTCATCCTC**TAAA**ACG**GAAAGAAA**TGACTGTGC**TTTC**TACACATGCTGAAGGCGGTAAGGAAGCCAT  
TACCATTGTTCATGTTCTAGCTACGAATGGACGATTAAGTGTGGTTGCTCTATAACCA**GAAA**CAGGCAGA  
ACCCACCAGCTTCGTGTACATATGAAGCACCTGGGCACACCGATTCTCGGAGATCCCG**TTTA**CGGGATCC  
CCTCTA**TAAATTTTC**GTTATGGTCTTGA**CAAA**CAACAATTGCATGCCATAGCTTGGTT**TTTG**CTCATCC  
GGAGAGTGC GGAGCGAGTGAAGCTAGTGA**CAAA**GCTTCCAGACGATATGACTTCC**TAA**TAG**AAA**AGGAA  
**TTTA**GAGAAGGTGTCTCTATACTGGATGGTTCGTGTGATTGG**TTTAAA**ATCACTAGGTAGT**TTTG**TTTT  
**TA**AGTAAGAAGTAT**TAAA**ATTAGATTA**TAA**ATACTATT**TTTA**ATT**TTTC**TTTCACACCTTCAG**AAAA**AGCT  
TGTGTAGGAT**TTTG**CTTCGCAT**GAAA**GAGTT**TTTA**GCGTACATTG**TAAAAA**ATCTTGTGATAAGCCAGAG  
GAAGTGCATCT**GAAA**GAGGTGCAGGGAACCAATACGATTATCTACGAATTGACTGTTGCTAAGGGAGATA  
TCGG**TAAA**ATTATCGG**TAAA**GAAGGACGCACTATTAAGGCTATCCGTAC**TTTA**TTGG**TTTC**CGTAGCAAG  
TCGAGATAATGT**GAAA**GTCAGCCTA**GAAA**ATTATGGAAGAGCGG**TAAAC**CGTATACG**TTTAC**AGCTT**TTTGA**  
GTCATTGTTAGAG**GAAA**GTCTTAGCGCGGTAT**TTTC**TAACACCGTT**TTTC**TTCTCGAGAAGACTGTAGTC  
TT**TTTG**GCCCGAGAG**TTTA**AGGATCTCAAGGGCCGAGTACCGT**TTTGA**AGTTCTCTTCTTGATCGAGCG  
CAGCGAGTTC**TTTG**C**TTTC**TTATGAGCGGAGACTCTCTCGGTAGGTAGGTCAT**CAAA**T**TTTG**CAATTT  
**TG**TC**TTTC**GATGCCCGAGTTGTCTGTAGG**TTTC**GAGCAGCTTCTTGATGTAGAGAACTGTGTATTT**TTTC**  
AGTTGGCTCAGATCTT**TTTG**TACGCTACTGCG**TTTC**T**TTTC**TAAGCATGCCAGCTCCTTCTCGTAGGAAT  
**TTTC**AT**CAAA**ACAGAGGATTTT**TTTA**AATAGTTAGAGCTGCTAGTTGAGCGGTTGCTTGCTTATCAGGAGC  
CGGGAGCGTGTCAAG**GAAA**TGGAGTCAGAGCTTC**CAAA**ACAGCGTTGTGAATGGCACTTGATGAAGGAGAC  
GTC**TTTC**T**TTTAGAAA**GCATGGAGCGCACGGTATCG**TAAAG**CTTATG**TTTA**ATGAATAGATATTC**TAAAG**  
**TTT**TGTTACAGCTCGCGGCTTAAGGAATCTTCTAGTATGAGTAATCTTTT**TTTAG**GAAT**TTTGG**AG  
AGTCTCGG**TTTG**TAAGCGTAGGAT**TTTC**GCTGATCGTTG**TTTC**CCAAGGT**TTTC**CCTGG**TAAA**TAGCTGTT  
GGCCGAGAGGTTAAGATAACCTGACATTCTGTATGTATATAGAGGGCGTAACAGATC**TTTAG**CGTGGA  
TACC**TTTAG**GGGAG**TTG**ATCTCGATATGAGGGAGGTCGGTAGA**GAAA**TCTTGAATCGAATCGAT**TTTA**AT  
GATTCCTCGT**TTTG**CTGCGT**TTTC**GATAGAACGAATTAGAGTCTCTGTAGTTGTGGAAGGACAGAT**TTTCT**  
**TTG**ATTAGCAAGGT**TTTG**TCATTAATAATATCAATTGTTGCGCGCAGAACAATGGATCCTAAGCCATCTT  
GGTAGTCGGAAGCATCCATCGTGCCTCCTGAAGGGAAGTCCGGAAGGAGAG**GAAA**ACGGTTGGTCATTCCAG  
TATAGCTA**TTTG**TGCTTCTAGTAGATCA**CAAA**AGTTGTGAGG**GAAA**ATT**TTTG**TAGTCATCCCTACTGCA  
ATGCCATCCACGCCATGAAGGAGTAGTAGAGGAATC**TTTG**CAGCTAAGATATCAGGTTCTTGCTCTCTTC  
CATCGTAAGAATCATGGAAGGTATGAGATCCGTAT**TAAAA**AGTACCTC**TTTAG**CT**TAAA**GGGCTTAGCCG  
CGCTCTATATAACGAGCCGCTGCATGAGGATCTCCTGTGAGAGGGTTAC**CAAA**GTTCCCTTGTGTCTCT  
ATCAGGAACCC**TTTATTTGC****CAAA**ACGACAAGAGCTTCCACGATAGGCGCATACCATGCGGGTGCAGCG  
CCATCGTACGTCTGCGATATTAGCCACCTTATGCAT**TTTA**CCATCATCCATACGGAATAAGGTC**CAAG**  
AAGCCTTC**TTTG**AACAGGCTTGAGGCCATC**TAAA**ACATGAGGGATTGCACGTT**CAAA**ATGACGTAAGAC  
GCATACGTGTG**GAAA**TGAGT**TTTAAA**TAGGTCCGAGAGGTCGCTCATAAGTT**TTTA**TAGCTAGAGGTT  
GGTAAACAAGATTCTCAATAA**TAAA**TAGT**TTTC**TCTCT**TTTG**TGTT**TTT**CCCCATGTAGAATTG**TAAA**AGT  
GTGTCGAGGG**TTTC**TGTATCAGGAAGA**GAA**ACTGGAGTTAAGCGCATGTCTGCGCCGA**TAAA**AGAT**TTTGA**  
ATTC**TTTAG**GAG**AAA**TT**TTTC**CTCCTAAGCC**TTTGA**AA**CG**AGTAAT**TTTC**AAGAGACGATTCTTT**TTTA**CCGAT  
GTGTTCTATGGTGCAGAGT**TTTC**TTCTTCTGAGTAGCAATA**GAAA**GTGGCATC**TTTG**TGGCGTACT**TTTA**  
**AAA**AGAGGGG**TTTC**TAGGAT**TAAA**TAGGTGGTTGCTTGAACAAGAGGAA**GAAA**GGTT**TTTAG**GA**GAA**AG  
TAATCATAAGATTACGAATATGCATACCATCAACATCCGCATCTGTTGCTAAGATCACCTGGTTGTATCG  
AAGAT**TTTG**TAGAGAGTCT**TTTG**TGCAGGCCGAGGGCTGTAGCAAGG**TAAAAA**AGTT**TTTA**TAG  
ATGG**TTTC**TT**TTTG**GAG**GAAA**AGACGTT**TTTC**CCCTCT**CAAA**GAGAACTGCTTGTGTGAGCG  
GAT**TTTC**GCGAAGCTAGAATCGAAGCGGAAGCCGATTCTCCTTCAGTAAT**GAAA**ATAGAGGAATT**TTTA**CC  
ATACAGAGAATTGCTGTGAGAT**GAAATTTA**CAATCCCGAAG**TTTAG**GGAT**TTTA**TAGTGGAGT**TTTTTT**  
TG**TTTA**ATC**TTTG**AGCTCTTGCTTG**GAAA**ATTGCGCATCTTCCGAGTTT**TTTC**GTTGAG**TTTG**AT**TTTCT**

CTTGATCCGTTCCGCGCTGGAAGGATTCTTTTCAAAGAAGAGAGCACAGCTTCTTTTACGCGTTTGCC  
TAACTCTGCGCGGATATTCGTATTCCTAGTTTAATTTTGGTTTGGGATTCAAAAATAGGAGAAGCAAT  
TTAATGGCGATACAGCCAGCAAGTCCCTCACGAATATCTTGAGAGGAAAAGTTTTCCTCAAAAACATCAT  
TAACGCCCTTGACTATACCCTCTTTAAAGGCAACGAGATGGGTCCGCCATCAGTTGTTCTTGGCCATT  
TACAAAAGAAAATATTTGTTTCGGAAGACGTTTCTGTATGGGAGAAAAGAAATGCGAGATCGGAGTATTGA  
AACGTAATAGGGGAATACAGAAGAGGGGTTTGCACCTTCTTCTTCAAAAAGATCAAGAAGACCACGAGTGG  
AAAATACGTTCTCCGTTATAAAATAATTGTCAGTCCGGGATGGAGATAGGTGTATTGACGGATTTTCTT  
TTTTAGAAACTCCACTTGAAAAGAAAATTTCTCGAATAGTTCATGATCGGGAGAGAAAACGACTTCTGTA  
CCGTCGGGATCTTGGGTAGCGCCCTGTTCTGTGTGTAAGAGAATGCCTTTGGAGAAAAGAGCTTTGAGGA  
ATTTTTGTTCCGCACAGAACGTACAGAGAAATGTTGCGATAAGGCATTAACGGCTTTCAGTCCCACGCC  
ATTTAATCCAACAAGAAATGAAAACATCCTGAGTGTATTTTCGCGCCAGTATTGATTTTAGAAAACAA  
TCAATCACCTTCCCCAAGGGAATGCCGCGCCTTCATCACGAATAGACAGTTGCTGTGCGTCTCTGTTA  
TGTGGATGGTATGTCCATATCCCATGACAAATTCATCAATAGCATTATCGACTACTTCTTTAAAATAACGT  
GTAAATGCCGCTTTCAGCTTGAGATCCGTCGCTAATCTTCCAATATACATTCCCAGCGTAGGCGGATA  
TGATCCAAGGAAGCTAAAGAAAATGATAGAAGATTCTGAATACGCAGTTTTTTTTCGCATAAGAGTGTGTG  
GAATAAGACAAAAGTTTGATTCCGGTTCTATAATTTCTGAGAAAACAATCAGCTAATAGTTATGCTCTCT  
TTAGAAAATAATGTAAGGCGTAGTATTTCTTTTAGTCTTCTGTCTCACTAAGCAGTGTGAGCGGTGAGG  
ACTTGAGATACTAAGATTAAGCCGTGGAACGCCTTTTTAAACGGTTTTTCATTTTCGTCTCCAGACTA  
CAAAAATTTTTCATGCAGAGAACGAAGAGAGTCTCAAAAATATTGGTATAAAAAATACGAAACAAAAGAGA  
ATAAGCCAACCGAGAGAAGAAGCATAACAATCTTTTCTTTAGAAAAGGAATGATGAGAGGGAGCTTAAGG  
AGTAAAGAAAGAAAACCGTGATGGTTAGGGAAGGGGAAGACGTATAGGTAATAGAGTTTTGTTGGCGTTA  
TTGGCGTGAGTTATCGAGAGACTACTTTTGCAGCAACGAGAGCAAGTTCTTCATATTTTACAACAAGCACA  
GGGGTCTTTTCGTCTGAAGTCTTTCAAGAAGAGAGGGACTATGTTTTATTGGCTACGTGCCATCGCGTC  
GAGTTGTATAGCGTCGCGCCAGCCGAGCTATTTGATTCACTGGCACAGGAAATAAAGCTCTTAGGTGTCT  
CGCCTTATTTTATCGAAATCAAGATTGCTTTTGCACATTTATTTTGTGTAGCAGCGGGTTAGATAGCTT  
AGTTCTTGGAGAGACGGAGATTCAAGGACAAGTGAACCGTGCCTATTTACAAGCTGCTAGAGAGCAAAAG  
CTTCTTTTGTCTCCATTTTCTCTTCAAAAAGCCCTTAAGGAAGGAAAAGTATTTTCGAGCGAAAAGGAG  
GCGCGCCTTATGCAGCAATCACTATCCCTATTCTCGTGGATCAGGAGTTACGAAGACGTCAAAATAGATAA  
GAAGCCCTTTTGTATTTATAGGCTATTCTGAGATCAATCGTTCTGTAGCTTATCATTTTGCAGAGGCAA  
GGATTTTCTTGTATCACCTTTTGTCTCGTCAGCAGCTGCCGACGTTATCTATGCGTCAGGTAGTAAGAG  
AGGAGCTATGTTTTCAGATCCTTATCGCGTCGTGTTTTTAGGGTCTTTTAGAATTGCAGTATGCTCTGCC  
ACATCCCCTTTGGGAAAATATCTGGGATATCCCCGATCGGATTGTTTTTGTATTTGCTGTTCTCTGCT  
CTGCCTTCGCATACGGTATTCCCTCACCGGTACATGGATATGGACCAAAATCAGTGATTGGTTAAGAGAGC  
ATCGAAAAGGAAAGTGAACCTCAGCACATCTCGACAGCTTGAGAGAGGTTGCGTACCGTTATTGGAACCTCT  
AAATCAAAGATTAGAACGGCATGACTGTGTAGGAGCGAACGCCTAGTTGGACTGTCTCTGGGTGTGTTG  
CAAAATACAGAGCAAAAGAAATAGAATCTCCTGTTAAGGCTATAGAAAATAGCAAGGAAATGGAGAGCGA  
TCGTTTCTATTAAGCCTTGAGACTCTTTTCTCTCAGCTTAGTTCTAGACTTTTCTAAACTGTGAAC  
TTCAAGTTGATTTATTTGTGTATTAGAGGTACGTTGCCCTATTACAGCTTTTCAATTCGGAAGCTTGCAAT  
TCTCTAATATGATGGAATGCAAAAGCCTTGATAGAAAGCAGGGGAGGGGGATCTGTTAAGCTGCGCTTAAC  
CTAAGAACGAAGAGAGGGAAGGCTTCTCTTGTGATTTCTTGGATACATACTTTTCGCACATAAAATGACTC  
TTTGATGCAGTGGCAGATGTCCCTGCGTGTGTGTCGATACGAGAGCTGCTCTGAATGAGTTGATTTGTG  
CGGAAAATGTGTTTTGGGAGATGTCTTTAGAAAATCAAAAGAACGAGTCTGTTGTCGCCCCGATTTTCT  
AAAATCTTTTGTGCTTTAAATTTGAAAGGGATGAAAGAGAAAACAAGAAAGGCTCCACTATCGAGATGAG  
AAATCGTTTTCCTTTTAAAGTAGGTATTGGCATAACTCAGCATAAGATCAGCGGGGCCATTCCAATAG  
CTAGGGAGGGAGTATTTCCGACCCAGAGCTCTCAGTTAGAGATGAGCACGTGAACACATGTTGAAAAT  
TGATAAAAGAAATTTGTGGCGTATATGGGAGTGGCTTCCGAATTAGAATTCGATGCCGATGGATCCTATGT  
GCTTCCGATTAGCAGCCTTGTGCGGATGCGCGTTCGTCAGAATGCTGATGAGGAAATATCATCAGTGTCT  
TTTTTGGGAGAGATTTCCGCATTTATGAGATATAGAAAAGCATATGCTCGAATGATGGAAGGCAA  
TTTGT  
TTGGCCAGGAGACTGGGGGAGCTGCCCTAGGGCTTGATAGTATGAGGATGAGGATGCTCGTACGGCGAGT  
CCCAGGAGAGGTGCTCAAGAAGATTTTGCAGTTATATAGAGAGTGTCTGAATTATGCTGAAGCGTGG  
CTAGAAGAATTAAGGACTGAGTAAAACGGAGCAGGAGTAAGGGATGGGTATACGCTTAGTTATTGATAAAG  
GGCCCTTGTCTGGAACGTCTTATTTTAGAAAATGGGACGAGTTGGTCTCTTGGCAGTATGAAAAGC  
TAGTGATATTCTCTGCAAGATGAAAAGCTTGTCTCCCTCTCAGATTTCGCATCACTTTAAAAGATGGCGAG

TATTA**TTTAGAAA**TTTAGATGCTTCGAGGCCGG**TTTC**TGTTGATGGAACAGTTATCACTGCCCTGT**TT**  
**TGT****TAAA**AGATGGGG**TTTC****CTTTG**TAATGGGAAGCTGCCAAGTCTCGTT**TTTAAA**GGGGAAGAGGTAGA  
AGGAGATATAGAGTTATCGTTCCAGACAGAAGGTGGTAATGAGGGAGAGCCTGCAGCGCAAGGCTCTTCA  
AGCG**TTTC**GTCCGAAGCTCC**TAAA**AAGGAGACAG**GAAA**TCCAAGTCTCCTTCGGAGA**CAAA**GGCTTCTG  
GAGAAGTATCTAGTTCAGCAATAGC**GAAA**GAACAAGAGTTAGCGGCGTCCT**TTTAG**GCTTCTGTTGAGAA  
GGAGCCTGGAACAC**CAAA**AGAAGTCTCTGAGC**CAAA**GGTCTCTTCACAAGAAGGACAGACTCCTTCTGTT  
ACAGGA**GAAAAAA**AGGATCTTGAGCTTCC**TTTG**GCAAGTCAAGAACAACCT**TAAACAAA**CTACTCCATCAG  
GCAGTGGTGAACCAACCAATCT**CAAA**ACGCGAGTATGGAA**GAAA**ACAGAACATCGCCCGAT**CAAA**ATCA  
GCAGCCACAGC**TTTC**TTCTGCTTCAAGATCGGGTCT**CAAA**GTCCC**GAAA**ATCAGGAGCAACAACCTTCT  
**CAAA**CGCCTCCCCATCCCCG**GAAA**CTCCAGAGCCGTGAGGAGAACCCTAATAGCGCTACGGAA**GAAA**ACT  
CGCCATCTCCAATGG**GAAA**AGCTTCCGTAACAGAAGAAGGCAGCTCAGGGACGAGTGAAGAA**GAAA**AAGA  
GGGTGAAGAAGATACTGCT**GAAA**GCGCAG**CAAA**TGAAGAGC**TAAA**GGCAGAGGCTTCTCAAGAAGAAGAG  
AA**GAAA**GAGGAAGA**TAAA**GGAGAGGTTCTTGCTCC**TTTA**ATGTTTCAGGATCT**TTTC**CGTT**TTG**GATCAAG  
GAATCTCCCTGCTGAGATAGAAGATCTTGACAC**GAAA**CAAGTTGCGGTTG**TTTG**ACGCAACCATCAGC  
ATT**TTTG**TTGAAGGTTCTTGCTGGTGCAATATCGGTGCTGAATTCCA**TTTG**GATAGTGG**GAAA**ACCAT  
ATCGTAGGAAGTATCCGCAGGTTGCAGACATTGCTTAAAGTATGATGAGT**TTTC**GCGCCAACATGCGA  
AGATCATTATCGGCAATGATAATTCAGT**TTTG**ATTGAAGATCTGGGTAGTAAGAATGGCGTGATTGTTGA  
AGGGCGCAAGATTGAACATCAATCTACGCTCTCTGCCAATCAAGTTGTTGCTCTAGGAACAACGTTATTC  
TTACTTGTGCGACTATACTGCTCCTTCCGATACGGTAATGGCGACGA**TTTC**TTCTGAAGATTATGGGTT**TT**  
**TTG**GTCGTCCGCAATCTCCTGAAGAGATTGCTGCCAGAGCTGCGGAAGAGGAAGAAGAGAAG**GAAA**ACG  
TGCTACGTTGCCAACAGGTGCT**TTTA**TATTAACCTTGTTCATTGGAGGGTTAGCTCTGCTC**TTTG**GAATA  
GGAACAAC**TTTC**TTCCATACGAAGGAAGTAG**TTTC**TATAGAT**CAAA**TCGAT**TTTG**ATTTCATGATATTG  
AACATGTAATTCAGCAG**TTTC**CAACTGTACGG**TTTAC**CGTTCAATAAGAACAATGGACAGTTGTTCTTAAT  
TGGGCATGTA**GAAA**TAGCATTGATAAGAGCGAGTTAC**TTTACAAA**GTGGATGCTCTCTCG**TTTG**TCAAG  
TCGGTAGATGATAACGTGATCGATGACGAGGCAGTATGGCAAGAGATGAACATCTCTTGTCTAAGAATC  
CAGAA**TTTAAA**GGTATCAGCATGCAATCTCCAGAGCCGGGGATT**TTTG**TAATCAGCGGGTATC**TAAAG**AC  
AGAAGAACAAGCAGCTTG**TTTG**GCTGATTATC**TAAA**TCTACAT**TTTA**ATTACC**TTTC**ACTATTGGATAAT  
AAGGTGATTATCGAATCACAAGTCAT**GAAAG**CTCTTGCTGGACATCTTGTGCAATCAGGTT**TTTG**GCAACG  
TTCATGTGTCTTCCCAATGGTGAAGCTGT**TTTG**ACAGGATATATCAATA**TAAA**GATGCAGAT**TAAAT**  
CCGAACGGTTGTGCAAGAAGTCAAGATATTGCAGGGATTCTGTGCGGTGAAGAAT**TTTG**TCGTT**TTTG**CTG  
CCTGCAGAAGAAGGTGTTATTGATC**TAAA**TATGCGGTATCCAGGCCGTTATCGGGTAACCGGTT**TTTCAA**  
**AGT**GCGGGGATATTAGTATTAATGTTGTAGTTAATGGGCGTAT**TTTA**ACTCGAGCGGATAT**TTTA**GATGG  
AATGACGGTAACAAGCATTCAACCGCATTGTATCT**TTTAGA**ACGGGAGGGGTT**GAAA**TATA**AAA**ATTGAG  
TACAA**TAAA**TAGGCAGTTCGAGG**TTTATTTA**ATTCTTCCAGGTAGGAA**TAAAT**CTATG**TTTA**ATATG**GAA**  
**AAT**TCGGCAGC**TAAA**GGAG**GAAA**AAAGCTGCTCGTCAGTTG**TTTG**ATCTTGAACAAGACATGCACGATGTAG  
C**CAAA**GCCCACGAAG**TAAAT**GTAAATGTACAGAGTAAGGTGCAGACGCTGACATCTTCTTTCGAGAAGG  
GGCT**TTTAAA**AGAGTCT**TTTG**GAG**GAAA**CAA**CAAA**CATTACTCGCGGGATATGTAGCTCT**CAAA**AGGTGCTA  
GGACGTATCAACCG**TAAAT**GGTGTAAATG**TAAA**CGG**TAAA**AGAGAGGGTATCTATGGCGAGCGGAAGTTG  
TTCGGCT**TTTAA****TTTC**AACCAGATGCTGGATGGCGTATG**TAAA**TACGTTCAGGGAGTACAACAATATCTA  
ACAGAATTAG**AAA**CATCCACGCAAGGAAGTGTAGACCTAGGGACAATG**TTTAA****TTTG**CAATTCCGCATG**C**  
**AAA****TTTG**TCTCAATATATGGAGTCTGTATCCAATATCTTGACTGCGGTGAATACT**GAAAT**GATCACCAT  
GGCAAGAGCTGT**TAAAG**GGAAGTTAA**TAAA**ATAAGAGATGGGTCATGGCAGAT**TTTG**GATGTAT**TTTAAA**GAA  
GAT**TTTG**CATTGTTG**TTTG**GAAGCAGGAATGGTTGCTAT**CAAA**CAAGGGGATGAAGCAAGCGC**TAAA**GCCT  
TAT**TTTC**AAGCATTACAAGTATTGGATCCTGAGCATAACAGCACATGAGTTAGGATCAGGATTGTTGCAT**TT**  
**GCATAAA**ATGGAGCTCA**CAAA**AGCAGAAGT**TTTA**TTCCGTGCTATTGTT**GAAA**AGATCCCGAGAATTGG  
AGTGCTAAGGCATT**TTTAT**CACTCACACTTATGATGATCGTTCTTTCAGCAAGGAAGTTC**TTTC**GAAGTGC  
GTAGAGAGAG**TTTG**GAGCGCTGCTTACAGTTAGCTGATCAGGATTA**GAAA**AGTTGTGAAGTAGAGTCTAC  
AAGAGC**TTTAG**GCTAAGTCTGTTCTGGATTGGCATGATGGATTAGTTGC**TAAA**AGTGGTGGGCC**TTTAAA**  
TAGG**GAAA**AGTGGGGTATTCCATGATAGATCCTCTTAAGCTT**TTTCCAAA****TTTG**ATGGGGATAAGGAG  
AGTGCTGCGGTGAA**TAAA**CCTTCAGCATCTCCTATGCCAGCGAATTAAG**TAAA**ATGTTGCCTCATTCT  
C**TTTA**GGGGGTGGAGGTGCTGCGTTGGATTGCACAGTGTCCACA**GAAA**AGCTATCGTTGATGGCTATGAT  
GCAGGA**TAAA**ATTCGCAGTTGATCGATCCTGAGTTGGAGGAAGCTCTGAACTCTGAAGAGTTACAAGAG  
CAGATCCA**TTTGT****TAAA**AAGTCTG**TTTG**TGGGATGCA**CAAA**CGCAGATG**CAAA**TGCAAGATCCCGACAAGT

TGGCCTCTGAGCATGTAGATGC TTTA AGGAGTCATTGTTGAT TTTA ATCAATGGGGAT TTTT C AAGCGATAGC  
TGAACATACACAACAGACGGTCAAGCAGGGTAATGGTGACGAA GAAA AATCTGTTACACGCAAGATAGTC  
GATTGGGTCTCTTCAGGAGAA GAAA TTTT GAATCGTGC TTTG TTGTA TTTT C CCGATCGTAATGGAGAAA  
GAGAAA CATTAGCCGAT TTTT C TAAA AGTTCAGTATGCCGTT CAAA GAGCTACACAACGCGCCGAGTTAT T  
TGCCAGTATTCTAGGTGCCACGGTGAGTAGTG TAAA AACGATTATGACAACCCAGTTAGGTAAACATGGA  
AGAGATAACGACCGAG TTTA ATACGTCATGACGGAATTGCCGGACGTGCAATTAACCGCAGTTGTGGGA  
CGTATTATCGAAGTTGTCCGGATGTTAATCAAGGCTGTTGTTCCGGATGTTCTGTGTCGGTGAAGTGTGCT  
TGGT GAAA CGTACGGGATGGAGCCTCTAGTTACAGAGGTAGTCGGT TTTA CGCAGAAT TTTG TCTTCC T  
TTT C C C TTTA GGGGAGTTGACAGGAGTGAGTCCTTCTTCGGAAGTGATGGCTACTGGATTGCCATTGCAT  
ATCCGAGCAGGAGAAGGGTTATTGGGTCGTGTAT TAAA TGG TTTA G GAAATCCTATTGATACAGAGA CAA  
AGGGACC TTTA GAGAATGTGCATGCCA TTTA TCCAATT TTTAAA GCTCCACCGGATCCGTTGCATCGAGC  
TAAA TTGCGTACGATCTTGTCTACAGGCGTGCCTGTATTGATGGGATGCTCACTGTAGC TAAA GGGCAG  
AGAATCGGAATT TTTG CAGGAGCCGGGGTTGGTAAGTCCTC TTTA TTGGGCATGATTGCTCGTAATGCTG  
AAGAAGCAGACATTAACGTAATTGC TTTG ATTGGAGAGCGGGGACGAGAGGTTCCGCGAGTTCATA GAAAA  
TGACCTTGGTGAAGAGGGAAT GAAA CGTTCATTATTGTGGTCTCTACTTCTGATCAGTCGTCTCAGCTG  
CGACTCAATGCTGCCCTACGTAGGAAC TGCATAGCAGAATA TTTT C CGAGATCAAGG TAAAACGGTTGTAT  
TGATGATGGACTCAGTAACACGT TTTG CCGGAGC TTTA CGTGAAGTGGGGTTAGCGGCTGGAGAGCCTCC  
TGCTCGTGTGGGTACACGCCTTCTGTAT TTTT C CAC TTTG C C TAAA C TGTTA GAAA GAGCAGGAGCCTCT  
GAT TAAA GGAACGATTACAGCAT TTTA TACTGTGTTAGTGGCCGGGATGATATGAACGAGCCGGTAGCGG  
ACGAGGT GAAA TCCAT TTTA GACGGGCATATTGTT C TTTT C TAATGCATTAGCGCAAGCATATCATTATCC  
AGCGATTGATGTGTTGGCTTCTATTAGCCGATTGCTGACAGCTATTGTTCTGAGGAACAACGTCGAATT  
ATTGGGCGTGTAGAGAGGT TTTA GC TAAA TATAAAA GCTAATGAGATGTTGATTTCGTATTGGGGAATATC  
GTCGAGGATCGGATCGTGAAGTCGA TTTT C GCAATCGATCATATCGA TAAA T TAAA TCGATTCC T TAAA CA  
AGACATTCAT GAAAA AAA CAAA TTATGAGGAAGCTGCTCAACAGTTGCGAGCAATATTCGGTAAGTCTGG  
AAA ATAGTAGGATTGTGTGGTTAGATATCC TTTA GAACCTGTCTTATCTATTAAGAAGGATCGTGTAGAC  
AGAGCAGAGAAGGTTGTTAAGGA GAAA CCGCAGACT TTTA GAGTTAGAACAAGA GAAA TTGCGTGAACCG  
AATCGGAGCGTGA TAAA GTTAAGAATCACTATATGCA GAAA ATTCCGAGCTCCGCGAGCAATTAGATGA  
CGGAACAACCAGCGATGCCATTCT TAAA AT GAAA GCGTATAT CAAA GTAGTTGCGATACAGC TTTT C TGAA  
GAAGAA GAAAAGGTCAATAAGCAGAAA GAAA ATGTGCTGGCAGCAG CAAAGGAGCTG GAAA GGGCTGAAG  
TAGAGCTGAC CAAA CGACGTAAA GAAGAAGAAA AAAC TCGACTGCA TAAAGAAGAATGGAT GAAA GAAGC  
TCT GAAA GAAGAGGCTCGCCAGGAA GAAA AAGAGCAAGATGAGATGGGGCAGTTGCTTCATCAATTACTT  
AAG CAAA ACAACGGGAATCTGGGGAGA ACTAA TTTA TGGAA T TAAA TAAA ACTTCGGAATCT TTTG TTTA  
GTG CAAA GATTGATCATAATCATCCACGTACAGAGGCTCATGAGCCTAGAGAT CAAA GAGAAGTCCGAGT  
GTTCTCT TTTA GAAGGAAGATCTTCGACTAGACAAGA GAAA GCAGATCGGATGCCAGGAAGAACCTCGTCA  
CGACAAGAGTCTTC TAAA AGCTCTGAAGAGGGTGTGTTTATGAGAGTACAGCAGGCGTCTCTTC TAAA G  
AAGAAGAAGAGAG CAAA GGAGACGGATTCTTCACTGGTGGCAATCTACATCCGGAATGGCATTAGTT GA  
AA CTCTATGGCTGTAGTGAGCGAAGCTATGATG GAAA CGAGTACGATGACGGTAAGTCAGGTAGATCTA  
CAATGGGTAGAGCAATTGGTAACATCTACTGTAGAATCCCTGTTAGTCCCGATATCGATGGCAAGCAGT  
TAGTA GAAA ATTGTATTGGATAATAGCAATACAGTACCTGCAGC TTTT C TGTGGAGCTAACCTGACTCTGGT  
A CAAA CAGGGGAA GAAATTTT C CG TTTT C C TTTT C GAAT TTTG TAGACCAAGCTCAGCTTACAGAAGCTACA  
CAACTCGTACAGCAGAATCCTAAGCAGCTAGTCTCATTGGTGGAGTC TTTG AAA GCTCGTCAGT TAAA TC  
TTACAGAGTTGGTTGTAGGGAATGTAGCTGTTAG TTTG C C TACGATT GAAAAAATA GAAACTCC TTTG CA  
TATGATTGCTGCAACTATTCGGCATCATGACCAAGAAGGAGATCAAGAAGGCGAAGGTCGTCAAGATCAA  
CATCAAGGCCAGCATCAAGAGAA GAAA GTAGAAGAAGCTCATATATAAGGTATCCCATGGCAGTTGCAG  
CAGAGCCTAGTAGTAATTGGT TAAA AGCTAGAGACGAGTTACTAAGTTC TTTG CAAGAACAGAAGGAAG  
AATGT TTTT C TTTT C CTGTT TTTT C CAAA GCAGGAGTGTGAGCAGAAA CT CAAA GA TAAA TTCCATATGGAA  
GAAGTGGAAATTGTCA TTTG AGTCTCGAGGGCTTCTGTCTGTTGCAGCTGCTGTACAGGAATATGGGGAGC  
GTAT TTTG C CCAACCGTT TTTA G CAAA CCCC TTTG AATCTGGGGAAT TTTA CATAG TTTT C TTCGGAAGA  
AGAT TTTG CAAGCTCTAATAGGAACGATT TTTA ATGATAGTTCCCTTAGCTTCTTACTTCTAC GAAA AAGAT  
CG TTTA ATTAGGAT TTTT C ATTATTAT TTTG TTGCAGAGATCTGCAAGCTGCTTCAA GAAA GTCCTTGGATTCT  
CTTCTATGTCTGTAAA AGTAACAGGAGATGTTGCTT TTTT C TGC GCGTGC TTTG GAGGGAGAGTATCATGT  
GATCCAAGTCTCTTGTG TTTA GATGGATCTTGTATACGGT TTTT C TATCTTAGTGCCT GAAA ACTACAGCG  
CAGAGCGCCTGTAGATTCTTAGAAGA GAAA GATCAGGCT TTTG ATATG CAAA AAGTCGATT TTTG CAAA CCC

CAATTACTCTCGCTGTAGAAGTAGGCTTTTGTCAAATTTCCAGAAGAAGATTGGCACCAGGTTGTTCCCTGG  
TAGTTTTATTTTGTAGATGCTTGTCTGTATGATCCAGATACAGGAGATGCTGGTGC TTTC TTGTCCATT  
CAACGGACCCGTTTTTTTGGTGGACGGTTTTA GATAAGCAGTCGGGATCTTTTAAAATTACAGGATTGC  
AAGAGATGCAACCAGAAGAGGCGCCTGAAGAACCTAGTGAAGGAGTCCGGCAACTCC TTTCCTTCGGC  
AACAAA AATCGTTGCTGAAGTAGCTCGCTATTCTC TTTC CGTTGGAGAATT TTGAAA CTAGGACCTGGC  
AGTGTATTGCAATTCGATGGTGTACATCCAAC TTTAGGCGTAGATATTATTCTGAATGGAGCTAAGGTAG  
GGCGTGGTAACATCATTGC TTTC CAAGATGTTCTAGGGATTTCGAGT TTAGAAGTATAAGCCT TTAGTA  
ATAGAGAGTCTCTGTCTATTCTACGTGAGAATTG TTTC CTTGCCGCTA TTTC ACAAGCGGCAAGGACCTA  
G CAAA ATGCTAGAGGTATCGAGTTCT GAAA GCATTGTACACCCGTAAGTTTTTA TGCTCAGATCGGGTGT  
ATCCTTCTCCTCCTAAGACGAACTATCTCCTAACACGGGAGCTCAGTCGTAAGGTAGGGTTGACTGTC  
TATCAAGGTGTGGATGAGCACTCTTCTCGTCTGTGTTAT TAAA ACATTGGTATCGCCAGGAATTCATG  
ATCGACGT TTTC TTCTGTGC TTTC GAAGAAGAAGCAAGGATTATGCAGCTAGTAACGCACCCAGCG TTGT  
TCGCTTGGAGGATAGAGGAGAGTGTGAGCAGGGACGCTACTTGG TTTC GGAATACAT TTTA GGGGAGTTCT  
CTGCGAGATAGTATTC TTTC ATCG CAAA TCTC TTTC GA TAAA GCGA TTTC TATTGTCTTGCAAGTAGCGC  
AAGCTATCACGACTCTGCATCGGCATGGGGT TTTC ATCTCGATAT CAAACCA GAAA ATATCGTGTCTCTC  
GCAATCAGGCGAGATCAAGCTCATTGACTATGGGC TTTC CGCTTGGCAATTCAATCATTGGGGATCTCCA  
GCATATATGAGTCTGAGCAGAGCAGACAGGAACCGCCCTCTCCGGCATCCGATGTGTATTCCCTTAGCTT  
TG TTGGCCTATGAACTGATCATGGGGCAGCTTGCATTAG GAAA GGTATATGTATCGTTACTGCCCTCTAA  
GATCAG CAAAAT TTTA ATACAGGCATTACAGCCATCACCGGCAGCAGCT TTTC ATCCATGCAAGAG TT  
GCAGAAGC TTTA CAAGATTACTTATTGCACGATGTACATGAGGATTATCGTAA GAAA GACCATGTTGTTG  
CACAGATAGAACAGTGGCACAATCAGAGAGCGTGGCTATCTCCA GAAA AGTTATCTGCTCCGGAAGAGAT  
CTGTGTTCATAT TTTA CTCA CAAA AAGAGCCCTGTTA TTTA CATAATA TTTA CTATGATATGCTTACATCT  
GGAAA CGTAGCAGAAT TTTC GTTCTGCTACGCTCCAG GAAA CTGTAGT TTTC GCGTTAGCATGAT GAAAC  
AG TTTC TTAATCAACGAGAGGAGAAA G CAAA AGATATT CAAA CAGTAAT CAAA AGTATGGATACTCTGTG  
CAAAA ACCATGCATATCCCTATTTGTAAAGAAGGGAT TTTC TTGTTGCTGT TTTA TATT TTTC CTAGAAGAA  
CTCATGTGCT TTTC TTGTGG GAAA ACTGAT TTTC TCGT TAAAAAG CAAA CAGGGGGGGTGCAACGAT TTTC  
AAGCGAATCGCAAGGAATTGGGGAG GAAA CTCCCTAGAGATCCACGAACAGTCCTT TTTC TGGGAGCC  
TGGAGATGAGCTTATCGTACACACCC CAAA AGCTAGAGAT TTTC GTATA TTTA TATTGCCCTTC TTTC CTG  
AAGTTGCAAGATAGAGGG CAAA TAGATATATTCTGC GAAA CAGATAACCTGCAGAAGGGAATAAGGCAGA  
AGTATGACAGAAGTC TTTATCCCTCAACACTTATCAGCT TAAA AAGAGTCCGGTGAACATAGTGACGTCG  
AACATAGGAAGCAAGAT TTTA AGAATCATT CAAA ATAACAAGAAA TTAGGCCTCTGTCTGCGTTAGTTG  
TTCTAGATGCGGCGTTGTTAAGTGTGAATTCACGATCTGGCGAAGGCTTAATAGGCCAGTCCGCTTC TTT  
GCCGAATTATCATGAGGCAGAACAGCAGATCGCTGCTTGCCC TAAA AATATTGCTAAGAATTTAG CAAAG  
AAA AGCTCTCCAGGGGC TAAA CCTACAGTAGGAGCTCCCTCTCCTGCACGGCCAG TTTC TGTAAAGGCAG  
CTCCTG CAAA GCCACAAGCTCCTGTGCA CAAA CACGGCAT TTTAAA AAGAGCCATCAGAT TTTC TCTCC  
TAAT TTTACGCAGTCTTCCCAACAGGTGAATAAA CTTGAG GAAA GAAGACGTCC TTTC GAGTCTCGATAC  
TTACAAGGCGCGGCTAAGCAGGCAGCTGCTG CAAA GAAAAAAGGCTCTTGAACAGGAGGTATC CAAA C  
AAGAAGAAGAAGCTTC TAAA CTCTGGGAAGAGAAA CAGAGTTATGCTCGTGTGCTGTGAATGCCATCAA  
TTTC AGTGTAAGAAA G CAAA TAGAAGAGCAACAGAAA ACCAT TTTC CAATCCAG GAAA TGACCAGACTCTT  
CCTGGGAAGAAA GATCCACATACATCCGGAGAACCTGTTATC CAAA CCGTACAAGACTGTTCTCAGGATC  
AAGAAGAAGAGAAA AAAGTTCTAGAGCGAT TAAA CAAA CGTTCTCTGACGTGTGAGGATCT TAAA GAAGT  
CGGATATACTGTCAAT TTTC GAGGACA TTTC TATCTTAGAACTGCTCCAG TTTC TGAGCAAGATCTCAGGA  
ACGAA TTTC GTT TTTC ATAGCAATGACTTGCAATTCATGTCACTATCG TTTC TCACGATCCTACTTCCG  
TAGATGAT TTTAGCAACGATTCTGTGCAAGTCTT GAAA ATGCATGACTT GAAA GTCGTTGAACAAG GAAA  
TAACGTATTGATCTACCGCAATCCGAAGC TTTC CAAGC TTTC CACGGTAGTCACAGATGGATCAG CAAA  
GATACTTGTGAAGCTGTAGTAGTTACACGAGTA TTTC GTTTGTACAGCGTCAGTCCCTTCTGCTGCGGTAG  
GCATTAATCAACCGCTGCTCTCTCATGATGCAATTATTAGTGCTTCCGAGTCTACGAGACACATTAATCGT  
ATCAGATATAGCAG GAAA TATTGA GAAA GTCCGGGAGTTATTGCAAGCATTGGATAGCCCAGGCACCGCT  
ATTGACATGTGCGAATATGATGTGCAG TTTC GAAA TCCCGCTGC TTTC GTGTCAGCTATTGTGAGGATGTT  
TCGGTGCCATGGCTGAGGAAGAGGCT TTTC CAAA TT TTTA TTCAGCCTGGGACCAA TAAA ATT TTTC GTTAT  
TTTC CTCGCCACGATTAACAG CAAA GACAATTC AAT TATTGGAGTCCCTGGACATTCAGAAA TTGGCACAT  
ACGTTAGACGATGTCACAAGTCTGCTGCTGC TTTC GGAAGCTCTGGAGCTGCTAATCCTAAGAG TTTC G  
GCTTCTTCATGTA CAAA TAAA ATAT CAAA ATGGGGCAGCTATCGCTCAGGCGATTCAAGATATTGGATA

CAATCTCTACGTGACAACAGCAATGGATGAGGATTTTCATCAACACATTGAATAGTATTCAATGGTTGCCT  
GTAAA CAACTCCATCGTTGTCATTG GAAATCAAGCTAACGTCGATAAGGTCGTTAGCTTGC TAAA TGGGT  
TGGACCTCCCTC CAAA ACAAGTGTACATTGAAGTATTGATTCTAGAGACAAGCTTAGAGAAGTCTTGGGA  
CTTCGGAGTACAATGGGCAGCTCTTGGAGATGAACAAGGGAAGGTGGCATATGCTTCCGGATTGTTGAGT  
AATACAGGATTAACGGATCCCCTCCGTAATCAATCTCTGCCTGTAGCACCTAACCCAG GAAA TATCTCAT  
TGCCAACACCTGGTCAGTTAGCAGGGATCAGTGATATGATGTACGGATCCTCTGCATTCGGACTAGGAAT  
TATTG GAAA CGTTCTCAGCCATAATG GAAAATCGTA TTTAACATTAGGGGGTTATTGAGCGCCCTAGAT  
CAAGATGGCGATAACCACAGTGGTACTTAACCCTAGAATTATGGCGCAAGATACACAACAGGCATCGTTC T  
TTGTAGGACAGACGATTCCGTTCCAGACTACGAGTACGGTGATTGAG GAAA CCGGATCTGTTACA CAAA  
TATTGAATACGAAGATATCGGAGTCAATCTTGTGTAACCTTCGACAATAGCTCCTAATAATGTAGTCAC T  
TTA CAGATAGAG CAAA CGA TTTCTGAGTTACATTTCGGCGCAAGGTGTGCTGACTCCTGTAACAGA TAAAA  
CA TTTG CAGCTACGAGACTACAAGTTCGGATGGATG TTTCTCTGTTATGAGTGGGCATATTCGTGACAA  
ACTGAC CAAA AATTGTATCCGGAGTCCGTTACTCAGTTCTCTTCTCTGAT CAAA GGACTC TTTAGTCCG  
TCTATCGATCAGCGTCAGAAA C GAAA TATTATGAT TTTCATTAAGCC GAAA GTCATCAGTAGCTTCGAGG  
AAGGAACAGCGTTAT CAAA CACAGAAGGATATCGTTATAACTGG GAAA GC GAAA GAGGATC TTTAGAGGT  
AGCCCCTCGTCACGCCCCGTAATGCCAGCATATTCCTAAGGTCCAAGCAGAAA GTAAT TTTAAAA TGCTG  
GAAA TAGAAGCGGAATAATGTTATAAGAGTTGCAAGTTGGTATTCTAACGCCATGGAATAGCTTCTGACT  
CTAGTG TTTGTACACAGGGGGGAAAGTCAAGATGGACTGGAGTTAGCCGATCTCCGGTTCTCTTGGCTT T  
TTATGGAGTTAGCC TAAA TAGCTCAGTTGGTAGAGCAACGCATTCGTAACGCGTAGGTCGTCGGTTCGAT  
CCCCGC TTTGGGCATTCCTAGGCAGAGTAATTCGATTAGGGTAGTCGCTTAGATAT TTTTCACATACAGGC  
CGTCAATATCTAGGTTGAAGGAGGCAAGTAACCATTCTTTCGTCGCCCTCTCTCAGATTCGAATAATCAGT  
CGCTCTGCCTGGGGT TTTGTTGCC TTGGCCCGGATCTGGGCGATCAC TTTCT TTTCAATGCTTCTATTTCG  
CAGTATCTTGGTTATACAGAGCAAGGTGACCTCTGCGTAGATCCAGAA TAAA GGATTC CAT TAAA GGGTG  
GTT TTTCACTATCTTCAATCCACTGCATACTCATTCTAATTGTATCCAGCTAGTGGCATCCAATGCCCTCT  
TG CAAA TC TAAA CAACAAGAATGTGT CAGCATCCCCACAGAACG TAAA ATGCGATTT TTTATTTCTGTAG  
GAT TTTCTTTT CACAAGCTGG TTTCTAGCCTC TTTCTCAGCAGAT TAAA AT TTTTC GACACTACTAGTCTTAA  
TGAAGATAGGATCTGCTCTTCTGATAGCCCTAAGGAA CAAA TATTGGACAAGCACAAGATATCTCCTAAT  
GATCTTGTGATAACGGCAG TAAA GAAGAGCTAGCGAACTCACGTTGATAGGGAAC TAAA AGCTCAGATA  
ACGCATCTCCATACTTAAAGAGCCGGAACATGAA CAAA GGCTCGCGCTATCAGCGCTGTTCCACAACGTAG  
GGGATCAGCGGT TAAA AATC CAAA ATCTGAAGAAA AAG CAAA AGACAGAGACTGTTG TAAA CGTATATCT  
AAA TCGATCAGCTTCTGGAGTAATACTTCCGGCTGCCATACAAA ATCTACGCCATGGATCACTACGTGGT  
CACGTAGATTAATGCCTGCTAACAACGTGCCTGCCTGAT TTTACAATTAGAGCCTCACCTTC CAAA CAACT  
CCCTAAA TGATATG GAAACAAA TAATGTTCTAA TAAA CATTCTCGTTGCCAGATAGG CAAA TC TTTAAGG  
GG TAAA CAAA GAATTCCTCACCTTCGATAGCC GAAA ACTG TTTG GCTATAGTCTTAACACATCACGTT  
TG TTTCTTTAGAAA GACAGGGAACGAA TTTGGAAA CAGAAA GAT TTTCTAGATAAA GAGAGCGTG CAAAT  
AGGGCGTGGCGTCTCTGTTCT CAAA GAATGCTTGATCGTTGCGATAGCAGTAAGAATATGATTAGGGAGC  
ATCGGTAGTATTCTGATTT TTTAGCTGATTAATCTGATCACGGATCTCTGCTGCTTGTTCATAGTCTTCG  
CGGCGCAGAGTCTCTTG TAAA GCCTCGTG TAAA GCAATAAGGCGCATAGCTGGGTTGATGATTGGTTGTT  
CGGAATTC C CAAA CCTCGACCAATAT GAAAGTTA TTTGCTTTCTCTGATGTATAGGAT GAAA TCGCCTG  
ATAACGCAGGAGCCTGGATAGGATAAGGGATTTAAA AGTGCATAGCATAGATGACAGCCTAATAGGAGC  
TCATCCGTATCACGGATACACCA TTTCTGTTTACAATTACCGCACTCTAGAATGAGCGCTTCATGAGTAG  
GGGAGGCTAGAATCGTCTCGGATCGTAATAGCGAGAGGGATATGGACAACCTGTTACATAACATAACATCG  
AGAGGTAATGTT TTT CAGAAATTTCTG TAAA ACAGATAGTGGCGGGTTGCTGACAATTATAG CAAA GAGCA  
GGAGACTCTTCTGTATGATCCATATC GAAAGCCGTGCAGATACAACGAGGTAC TTT CAGCAATAACAGAA  
AAAA CAAAGGAAG GAAATCTTT TTTGATGAGGAGGGAAGATCTCTTAGAGAAA GAAA TGGGTCTTGAAGG  
ATTCGAACCTTCGACCCTCTCAT TAAA AGTGAGATGCTCTAACCGCTGAGCT TAAA GACCCGCA TTTCTTT  
TTGTAATGACCCCAAGGGGATTCGAACCCCTGTTACCGGAAT GAAA ATCCGATGTCCTGGGCCAGGCTAG  
ACGATGGGGCCAGGACGGGTCTAATGTTATCAC TAAA CCCTTTT TTTCTGCAACTC TTTCTGTTCTCTAA  
CGCAT TTTATTTTTA GAGAATAGGGAAGTTGCACAGAAGCATAACTACACCGTAGCTAACTCTGCTTCTTT  
TTGTTTTG CAAAGCTCTTCTATTTG CTTA CAAA ACTTATCTGTGAGCTCTTGAAT TTTCTTCTCTAAGCTT  
TT CACAGCATCCTCTGTTAGGTTGTCATCCTT TTT CAGCCTATCAT TAAA AGTCCGTGCAATATTACGAA  
TAGCAACCTTCGCTTCTTCGCTCTTGGCTTCAGCTGCTTAATTACTTCTCGTCCGGTATTCTTCCGTAGG  
CTCCGGTACGTTAATCCGAACCGTGGCTCCTTCAACTATAGGTTGTAGG TTTAAAATTTGCTGC CAAA ATT

CC TTTGGAAATCGCA GAAACCGTCCCTGCATCGTAAGGGGAGAT TAAAAGTTGTCGCATATCAGACACGC  
TAATCGATGCAATGTCTGATAGTCGCATGGTTGTCCCGTATACCTCAACAGTAACCG TTTCTACCAACGC  
TGGGTGCGCCTTTTCAGTTCTGAAA CCACGGGTCTC TTTCTGAAA AAACGTTAACTCCGGCCATCTCT  
TTCTCCGCAGAAGCTAGTGTATAATTTGCTCCTTCCGCAGAAGATATCACTGTACCAACAGTAT TAAA  
GACTGCCTCCTC TAAA GAATGTCTAG CAAAAGC TAAA CATCTTTA TGGGGATTCTGCTTCCATACA CAAA  
GATATGGCAGCCGGATCGATCGCTCCCAATCCTTGGGAGAGAAA GTCTCTGTAA GAAA TATGATCGTACC  
TTACTGCATCAGCGCATTCACGAGGATCTTGGTCATACACCCCATCCACGTGCATAGTCGCT TTTAGTAA  
AACATCGACCTTTA ATTACAGGCTCG CAAA GCTGCACCTGTGTCCGTTGTTAGATAAGGAGCTCCTGCT  
CCCATGGTGCATATCACAAC TTTA CCCTGGCTTAGGGCGTCAGATGC TTTCTGCGGATTATATAACTCTG  
CTAACTGTGGGCATGA CAAA GTCGATGTCAA TAAA TTGGGCACATCCTCAGTCTT CAAA GCATCCGCTAA  
CGCCATTCATTAATTAATGTGCGTAACATTTCCATCTGATCAGCC GAAA CCCGATTAATCTGCAGGCTC  
TGGC TTTG TGAGAGACCGCGGAGGATATTGCCCCACCGATTACCACCGCGACCTCAACATCTGCATTGC  
GGACGACT TTTA ATTCCGCAATCAATCGGGAGAGTC TTTCTTCACTAAT TTTG TTACTAGAATCTCCATC  
AGAAA GAGCCTCTCCAGAGATCTTGAA TAAA ACTCG TTTCACTCGTTT TTTCATCATCTCGCCA TTTGGT  
TATGCGCCCAT TTTCCAGAAGA CAAA GTGCTCAACTCTGAGTGGCTCACCCTAGCT TTTG CAGCTCTAT  
CAATCAGACCTTGAATTTGTGACTTCAGGGTC TTTA ATGAAGGCTTGTCTAAT TAAA CAAGCCTCTTGAAA  
AAAGGC TTTAAATTTCCCTTGAGTAAT TTTCTCAACTACTTCTTGGGG TTTCCAGCCACTTGGGAAGAAA  
AATACTTCTCGTTCTC TTTCTAGAAA TTTCTTGAGGAACGC TTTCTTTACTTAAAGAACTGTGGCTGACTTG  
CGACAATATGCATAGCAATGTC TTTAGCCAAA GCCTCTTGATTCTCAGACCCA GAAA GAAAACTATAGC  
CACAGCT TTTTC CATTTTC CATGAGAA TAAATCCCTACAC TTTG ACCAGAGTTAACAGGCGTGTAGAAA GCT  
CGGCTAATGCGGATATTCTCTCCAACCGTTTG CATCGTGACAGC TTTAAGCTCTTCCACAGATAAGGAAG  
GCTCTTGAGAGGACATTACGCGAGC TAAA GCTTCAACATCGCTAAGCTTGTGGTCAAGAAGATCGGACAA  
TAAA CTCGTAACGAATGCTCG GAAA AACTGTTGTAGCAACAAA ATCAGTTTCAACGTTGACTTCAACA  
AGTGCTGCACCACGTTTCATCAACTCGTGCAGCAATCACGCCTTCT TTTGTTTC TCGGTGCTCTTT TTTGC  
CTGCAGAGGCAAGACCAAGCTTACG TAAATAAAA CAACAGCATCTTC TAAATTACCCTTAGCATGCTCTAG  
AGCCTC TTTACATTTAGT CAGGCC TACACCTGTCTGCTGTCT TAAA TT TTTCAATG TTTTC CATGGAGAAG  
TCGCTCA TTTCAATGCCTCGCAATTTGTCAATATCTGCCAGAG TAAA ACCCCCTC TTTAGAAGAAGCTTC  
ATCTTGAGCTTCTCCTGTTGGAAGAGGAAGCTCTTCAACAGCTTCTTCCGCAGGTC TTTCTGCAGGACGC  
ACCGGAGATAAAA TTTTCGACGCC TAAACG TTTCTTCGCATCAATAACAGCGTC TTTAAGTGTATTAACAA  
TCAGACGGATACTCTTAATGGAATCATCGTTGCAAGGAATAACGTGGTTGATTGGTGTGGATCGCAGTT  
TG TATCCAC TAAA GCCATGACAGGAATGCCAAG TTTCCAGCTTCTGCAACAGCAATGCGCTCATAGCCC  
GGGTCAATTACAATCAGAAGCCCTGGGAGAGAGTT CATATGACGAACGCCTTCCAGGTTGTTGAGCAATT  
TG CGATGTCTTTTGCTAATAAAA GCGAGCTCTTT TTTG GTAAGACCAGAATTAGAAGCCTCAAGATCCAA  
TTCAATTTCTGTTCAATGTCTTCACAGAG TTTCTAATGGTTGCCATGTTGGTCAACATGCCGCCAACCAT  
CTCTCTGAGG CAAA GAATTCGCCACATTCGATAGCAGCTTCTCTAATGATCTGT TTTGCTTGT TTTG  
TTCAA CAAACAAA ATAGACCTCTCTGATCGATAGTTT TTTGAATGCAAGAAA CAGCCTT TTTCAACTG  
ACC TAAAGT TTTAGCCAAGTCGATGATG TAAA GGCCATTTT TTTCTT CAAAAATAAAA AGGCTTCATCTTG  
GGATTCAGCGACTTGTCTGGTGT CAAA ATGTGCCCGGATTCTAATAGTTCT TTTAAAGTGAG TTTGC  
AGGGAAGTTCCAAGC TTTGTTTCTCT TTTATGTGTTAACAAGGCATCTGAGAGACGCTCAGA TTTCAGA  
CTTGGGAGTCATACAGGAG TAAA AAAGCGCCCGATCAGAATCGAATGACACCGGTAGCTTGGAAAGGCTA  
CAGCTCTACCATTGAGCTACGGGCGCGCTCAAGTAGACCGATATAGTATTG GAAA AGAGGGTT TTTATGC  
AATCTTCT TTTAGA GAAAT TTTA GAT TTTGTTGGTAAGAGAGATAGGAGGGAGATC GAAAGTAAGAA CAA  
AAAT TTTGCAAAA AAAA ACTGGACCCGACCGAAGTCGAGCCCA GAAA CACGGATAGTGTATTAAACGTTA  
TTAA CAAA GATAAAA CTGCA CAAA G TTTAACAAA ATTATACAATTAATTAGAAGCGGAATTGTGCA TTTAC  
GTGAGCAGCTCTCTCATCGATCAAGCGAGTCTCAACTGTAACCTGCGTA TTTGCTGTCATCCACAATAGTT  
GTTCTACTGCAATACCGCAAGAT TTTCTAGAT TTTCACTTGTTC AATTGCAAG GAAA CAGAT TTTG CATGG  
TATCTCCGAGCTGACCCTCTGCGCTAGC TTTCACTCGCCAGCTCCAGCAATAGTTGGGTT CAGAGTGGT  
AACAT CAAA GACAGTTGTAGCTGACTTCGGCTGAGCAATACGAATCGTGTCTGCAT CAAA ACTTGTCTCGA  
GACCA TTTA ACTCCAATGTAGGGAGTGAACATATTCAGTCTGTAAGAGAGAGC TAAA ACTTGTCTGCCATT  
CATGGTAATCAATAGAGGCATCCTTAGTTCTCTGTACACCATCTGTTCTCTGCT TTTAAGATCAAGAGGGAA  
TTCTTGCCCTACATATCC TTTA AGGCTTATTGATAG TAAA CTCAGCTGCGTTACAGAGAACG TTTAATTCT  
TCGAC TTTAAGGCTTGGATTGAGCGTATTG GAAA GAAGCGCC TAAA GTCGCGCATCCACATTCCCA CAAA G  
CTGCACGAGCTCCAGCACTCCAAG CAAA AGTAGTATCTGTATACAACCTCAACAACAGATTGATCTAAGCT



CATA TTTG GTACAAGCTTACTATCT GAAACTGTAGCATGGTTCATTATCTCCGAATAACCCAACTAAG  
TT GAAAGATGCTGAA TTTCTTTAAGATATCCACTGGTGGCTCCTAATGTACAGAATACAT CAAAACGAT  
CC CAAA TATTCAATGCCATGTAAGCAGCAT TTTGTAAA CATCTCAGCATCCTGCATATGTCGGCCGTAAGC  
AGGATTCTCTCTTGCTGTACAAGTGGATGGAGCTGCAGCATTGCCGTAGCAGTTGTAGGCTTGGCACCC  
A TTTG GAATTC TTTA TTCACATCTG TTTGCAAAA ACACGGTC GAAAA CAAAGTCACCATAGTAACCCATAC  
GCATGCTGATAGCGTCACACCAAGTGGTGCAAGGATCGCAAGGATCTCCGCC GAAA CTTCCCATAGAAT  
TCCGTCGATCATAAGGCTTGGTTCAGCAGGATTCCCCACAGGCAGAGCTTGCAAGGAGGAAGCAGAACT C  
AAAGCGG CAAA CACTAATACCGA TTTCAAGAGTTT TTTCAATTCTTACCTC TAAA TTGTATAATTAGCTCT  
C TTTGTGCTCGCTATCTT TTTCTGGCGGCACTGCGTCCTAGT TAAA GCCAGACAAGATGTCCTGTAGCAA  
TTAATGGCCTGAGGAATGTCTTGAAG TAAAAGCAGCCTTAATCGAGAACATGTCGTTCAATGCTCGAGA  
CCATAA CAAAAT TTTCTTATTCTCG TAAAAGTTGATAA GAAAAACGTTCCGTCAGGAAGAAGCCCTTAAG  
CGCTCCTGATTTA GCGA TAAAAGCAGAGAGCCATT TTTGTATATCTT TTTATGT TTTATGTTCTTGGTT T  
TTGC GAAAAAATCGCTCTGAAA CCGAGAG CAAAAGCCATGTTGGCAATATGTTGATTGTTGAGAATGAG  
AGGGT TTTGAGTTAATTA CAAAACAGTTCAAT TTTATGAGTTGTTAA TTTCCAAA ACCTAAGATT TTTG  
TG TTTGGAATAGCTCGAAGATGGGGG TTTGGCTAAAAGAAAAGAGGAGATT TTTGTAA GAAAAATCTAAGA  
A TTTGT TTTGATA GAAATCGTT TTTATTACTA CAAAGAAAGTGT TTTAAA CGGTCGACCAATAAAAACA  
GAT TAAACTAACCATATAT GAAAA GAAAACGACGCACCCAC TTTCTGTGCCA GAAAAGGCTAACAGACT  
ACTTGTGGGATTTA TTATTGCT TTTGCTATCATCAC TTTGCGTATATGGCATGTTGCTGTTGTGCAGCAT  
GAGAAA AAGAAGGAAGAAGCTTATCGTCTCAGCGTAGAAGTGTTCCTGAGCATTGTGATCGCGCAGGAG  
TATGTGATCGT TTTGG TAAAACGCTGGCAGAAAACGT TTTA CAATATAATGTGGGGATCTCTTATCGAGC  
GATACGTGATATTCCGACGCGTG TTTGGCATAACAGATGAGCAAGGGAATAAGAGGCTTGTTCCTGTTCTGT  
AAGGATTACAT TAAAAA TTTGCAGATTT TTTGGCTCAAGAGCTGCATATGGACCCTGA TTTCTGTTGAAG  
ATACGATCCATGCC AAAAGCTTCTGTATTAGGGTCTGTACCTTACATCCTTCAGACTAATGTATCTGAGCG  
TACTTT TTTAAGGCTCAAGATGCTGGAGAAGGATTGGCCAGGATTGCATGTCGAATCTTCGGTTCGCAGA  
CATTATCCTGAAGGGCGCACAGTAGCTGA TTTGTTGGGGTATGTCGGACCTATTAGCGCAGAAGAACATA  
GAAAAATTACGAGGGAGTTAG GAAA CCTAAGAGAATGCATTTCGTGCTTATGAAGAGGGTGAGGATCC TAA  
ATTTCTGCAGGAATATCGAGCGTCGATCAAGTACGCAAGCT TTTGCATGAGTTAGAGATGCATGCCTAT  
GGAT TAAACTCCTTGATCGG CAAA TTAGGTGTAGAAGCT TTTTGTGATCG TAAA TTAAGAGG TTTGATAG  
GCAAGCGATCTATGCTGGTAGATCGAAGAGGGAAT TTTATT CAGGAGATGGAAGTTCCTCTGTTGGAAG  
CCCAGGTAGAACAATCCAGTTAACGATCTCTACAGAGCTACAAGCT TTTGCTCATGAGCTCCTTGCAGAA  
CATGAGCGAGGTGAGGTG TTTACGATTATCGACAGTGGCGTCAGCAACAATA TTTGCCGCCCTTT TTTCC  
CTTGGA TAAAAGGCGGGCGATTGTGCTATGGATCCTAAGAATGGG CAAA TCTAGCGATGGCCTCTTC  
ACCACGTTATGACAATAATGAC TTTATCAATAT GAAA GACTCTCCTAATCAGGAGGAGTGTGCTCTCTCT  
GTATTGCGTATGGCTG GAAAACCTTGAGTACATCGGAGAAGTAT TTTGATAGACCGCTTCC TTTACGAAGAG  
AGCGATTGGATCCTCTCAGTGGAAAATAT TTTGATGAAGAGCTCTCT TTTCTGATCGAGCTTT TTTAGA  
T TTTAT TTTGCCAGACAGCT TAAA GTTAAGCAGATGCTATGCGA GAAAGGTTCTATTGGGCT TTTCTATT  
TATCTGCAAGGAACGATCGAGCAGCT TTTGGAAA TG TTTGAGTGTGAAGAAAAGAGTGTGGTCTCGTTT  
TTGATGTTCTATTCCC TAAAGAGGATGGGCATGAGATTATCGGAGAGGTCACATCTCT TAAAACGACAGAA  
ACAG TTTAAAGCTATCCTTGCT GAAA GAGAAGAAGAGGTACAAGCT TTTCTGCGAGCGCTTGGCTCTATT  
TTTG CAGATCTATCTGCCAACTACGAT AAAAATTCTA TTTCTGGATCTATTGCGTACGGCAGTAGATCCAG  
AAAAAGTCTCTATCTC TTTATTAGCAGAAAATTGGCCATATGTCTGTCTTGGAT TTTGTAGATTATCAAGG  
GCAT TTTCAATTGC TTTGCGGAAATCAT TTTGCTAAA CTGATGGAGAATGCATTTA TCGATCATGAT TTTACC  
GCTTGGCGTGAAGAGCA TTTACACAG TTTATTAAGCA GAAA CCGGATGAGGAGTTGGAGAGGAAGCAAC  
GATACCAACCCCTTATGTGGATTA TTTAGTAGAAGAGCGGTCTCGGCAATATGCTCTTT TTTGCCGAGA  
GCATATGGATTCT TTTA TTACTTT TTTACTGT CAGAGATAGAGCC TCTCTTGGTAATCCCTAT TATCAG  
GAGATTGCTTGTGGCGCCAAGAACTACGTTCTGGCGCCTACCCCTGC TTTAGAATGGCGAGAGCATTACG  
ATTT TTTACATAAGCA TTTGTGCGCAGACCTCTTATGA TTTATGCGAACTGTTTG CAGCT TTTGAGAGT T  
TTCTGAGCTTAAGCGTCTCTATATGGACAATATCCACTAACACTGACGCGGAACATAGAG CAAA TAGAG  
CAGGATCTGATCGCTCTT TTTA CCCATTGTATGGTTATGGGCATCTATCTGCTCATGC TTTCCGGTCAAG  
CAGCGAC TTTAGGGTCTATT TTTAAGTTAGTATCTGCTTATTCCGTTCTTGTGCAGCATCTTTCTGACCA  
AGAAGA TTTATCTAAGTTATTGGTGATCGTAGATAAGCAATCTCTGGGGCTGCGTTCGGGAAGCCTCAT  
GTTGGATTT TTTAAA GACGGCTCTCCTATTGCTTC TTTCTTTAAA GGAGGGATTCTGCCTGGGAATGATT  
ATTCTGGGAGAGGGTATATCGATCTGATCGCAGC TTTGGAGATGCTAGCAATCCCTATTTTCTCTCT

CGTTAGTGAATATC TTTCTGATCCTGAAGATTTA TGCGAGGCAGC TAAACTCTTCGGT TTTGGAGAAAA  
ACAGGGATAGGACTTCCTGGAGAATATGCTGGAAGAGTGCCTATCGATGTGCGATATAACCGTTCGGGGT  
TATATGCGACTGCTATTGGGCAACATACATTAGTGGTGACTCC TTTACAAA CCGCAGTGATGATGGCGAC  
GTTAGTTAATGGAGGGATTGTCTATCAGCCGAG TTTGATACAAGGTGAGTGGTATCAAGGAAGTT TTTCT  
CCAGAACAAGCTAAGAA GAAAAGAGAAA TTTCTTGCCAGATTTCGATCGTCGATCTA TTTAAGAGAGGTA  
TGCATAACGTGAT TTTGGGTCAATACGGGACGACGCGGTTTCATGCGTCAACGG TTTGCTCCTGAACGATT  
GGCTCGTATTATTGG CAAAACGAGCACAGCAGAAGTGATTGCGCGAGTAGGGTTAGATCGTGAGCGAGGA  
CGCAT GAAAATT GAAA GACGTGTGGTTCGCTGCGGTAGGATATGAAGATGAAGCGTTATCTCATCCGGATA  
TTGTTGTTGTTGTGTACTTACGGCTAGGAGAG TTTGGAAGGGATGCTGCGCCTATGGCAGTGCGTATGAT  
AGAGAAA TGGGAAGAGATTTC TAAAAAATCTTT CAGCTAATTCGTGATTGGCATGGTT TTTGCTCCTGTA  
AAAGGTAAGGTATTAC TTTGACAGGGAACGACTATGGAAGAGGCG GAAAAGCAT TTTAGCGAAA GAGTTT  
TGTTGTT CAGGCATTA TTTATT TTTGAGTGGTGAGTACGAGCAAGCAGAAGAGAGATT GAAAAGAGTCCTT  
AGAGTTAGACTCGGAAGCTGGGCTAGCCTATTGTTATCTGGGGATTATTGCGTTA GAAA CAGGACGTACA  
GCTGAGGC TTTGGTTGTTGTAAGCAAGGGTTAGAAGCTGAGCCTGGAGACAGCTA TTTACGTTATTGTT  
ATGGCGTGGCTTTAGATAAAA GCCGATCGCTTAGAAGAAGCGATCGGGCATTATCAAGTGTATGCAGAGTT  
ACATCCTGAAGATATAGAATG TTTATTTAGTTTA GGGAGTGCATATCATCG TTTA TTGCGTTATGAAGAA  
GCGATTGCCTGT TTTGATCGAATTGCGCAGTTAGATCCATGGAATCCTCAAGGTC TATACAATAAA GCGG  
TCAT TTTATCAGATATGGAGGATGAGGAAGGCGCTATTGATTTA TTAGAATCTACGGTGAAGAGAAA CCC  
TCTATATTG GAAA GCTTGGGT TAAA TTAGGTTA TTTAC TTTCTAGAAA TAAGAT TTTGGGATCGTGCAACG  
GAAGCGTATGAGCGTGTGTGTCAGTTGCGTCTGAT TTTGTCGGATGGGCATTACAATCTTGGGTTATGTT  
ATTTAACGCTAGATAAAAACGCGATTAGCATT GAAA GCGTTTC AAGAATCTTTG CTGT TAAA TGCAGAAGA  
TGCGGATGCGCATT TTTATATAGGATTAGCTCATATGGATCTTAAG CAAAATGAGCAGGCATATGATGCA  
TTTTATCGAGCTCTGGGGATCAATTTAGATCACGAACGTTTCGACTA TTTA TTGGGATA TTTACATCATA  
TGCAAGGCGAGTCT GAAAAAGCAGAAAAGGAAC TTTCTTTTTTTGTTGCTAAA GAATCTGTGT TTTGCTCC  
TTTGTTACAAAAAACCGTAAGCAGCTCGGTT TTTCTGAG TAAA AAGGAGACATTAT TTTGAACAAGCGAA  
CCCTTT TTTGCTTAGCAATACTCTCTCTGACCGTCTAGCGATTT TTTGATTT TTTATTTGTTTGTTGTTG  
AGAAA AATTCATTTTT TTTACGATCCGTGGCCAACAAGTTTT TTTCTTAAGGGCTGT TTTGACAGTCCTT  
TCCTTGGGTCTAGGGAGAGACATCCTCT TTTCCCTAGGCTGTCT TTTCTTTTT TTTCAAAAAGGTGTTGAA  
AAAAATATCTCGAATTGTCAGTTCAGGATTTGTT TTTGCTTT TTTGAGACAGAGGAGATAATAGGCTCTTT  
TCTCACGAGCTCCACTC CAAA TAGAGTGGCATCCTGAT GAAA GAGGAGGATCATGGACGCACCGGTAGAT  
AAATTTCTGCAGCAGCAGGAATATCCCTATGGATTTGTT TACTCCGATACAGTCGGAAGGGTTAGCGCCAG  
GTATTAGTGAAGAACATATAGAGCAATTGGTTCA TTTACGCGGCGAGCC TAAA TTTTATTAGATTTTC CG  
GTTAAA AGCGTTTC GTTTGTGG CAAA AGATGGAAGAACCTACATGGGCTCGCCTGCGTTATCCACCTATC  
GCCTATGATGACATCGTCTATTT TTTCCGGCCCC CAAA CAAAGAAA CCCCTAGG GAAA TTAGAAGACGCAG  
ATCCA GAAA TTTA GAGACATTTAAA AAATTTGGGCATCCCTATTGATGAG CAAAAAAGGCTTCTCAATGT  
GCAGGATGTTGCTATGGATTTAGTGT TTTGATTCCG TTTCCATAGGGACGACT TTTCAAAAAAAC TTTGGAA  
GATGCTGGAGTCAT TTTCTGTTCA TTTCCGGGAGGCAATCCACAAT TATCCTGATTTAGTGAAGCGCTATT  
TAGGATCCGTAGTGCCAGCTCGGGATAA TTTCTTCGCGGCAT TAAA TTCTGCAGTGT TTTAGTGACGGGTC  
GTTTCGTGTATATCCCTAAGGGAG TTTGCTGTCCGATGGAGATATCTACATAT TTTA GAATCAATGATAAA  
GAGTCCGGACAA TTTGAGCGGACGCTCATCATTGCGGAAGATGACTCCTATGTCAGTTA TTTA GAAGGAT  
GTACAGCACCTTC TTTCTCTTCGCATCAACTGCATGCCGCTGTTGTTGAGCTGGTAGCACATAACCGTTC  
GGTTATCCGCTACTCAACCGTA CAAA ATTGGTATCCTGGAGATCGTAAGACGGGGAAGGGAGGCATTTAT  
AAT TTTGTTAC CAAA CGGGATTATGTGCAGGAGAGCATTCTAAA TTTCTCTGGTCTCAGGTGGAAGTGG  
GTGCTGCGATTACTTG GAAA TACCCGAGTTGTATTC TAAA GGGGAGAGAACAGTGTAGGTGAGTCTATTC  
TATAGCACTAATAATGGGAAGATGCAGGCGGATACAGGAA CAAA AATGTTACATATTGG GAAA GGCTCT  
TCATCTACCATTG TTTCTAAGGGAA TTTCTGCAGAAGAGTCTCACAAAT TTTCCGTAG TTTGGTTTCGA  
TTTC TTCTCAGGCAGTGGGAAGTTGTAATTACACGCAAGTGCAGTCTATGCTTGTGGAGAGCGCTGCGG  
GGCTTATACGGATCCA CAAA TTGTTG TAAA CAATGGAGAGAGTTGCGTGGAAACATGAAGCTGCAACTTCT  
AAA TTACGAGAAGATCAGTTGT TTTATCTTCGTAGTCGAGGATTC AATACGGAAGAAGCGGTTAG TTTAG  
TGGTACATGGTTTC TG TAGGGAGGTTATAGAGCTATTACCTCTAGAG TTTGCTCGGGAAGCAACCAAGTT  
ATTAATGATTAAGTTA GAAA ATAGTGTAGGCTA GAAA TGCTTCATCTATGTGATGTACATGTATGTTGTG  
AAGAAA AAAAGATCTTGAAGGGCTATC TTTA TCCATTCATCCTGGCGAGCTACATATTATTATGGGGC  
AAA CCGCGCAGG GAAA TCCACT TTTA GCTAAGGTGCTATCTGGAGATGAGAGTGTGAGGTGTCTTCTGG

ACAATGACGTTGGCTGGGCAGGATTTACTGGAGCTATCTCCAGAAGAGAGAGCTCATGCAGGGATGTTTA  
TTAGTTTTCAACATCCTCCGGAAAATCCTGGGGTGAACAACCGTATTTCTTAAAAGAAGCTTGTAAATGC  
CTGCCAAAAGCTCGCAATCAAGTGGTGTAGATGATGCTGCTTTGAAAGAGCTGCTTACGCATCTGGAA  
GAGGTATATGGATTCCCGGATTTTCATTTTTTTTCTAATAGGAATGTGAATGAAGGATTCTCCGGAGGAG  
AGAAAAAGAAAACGAACTTTGGCAGATGTTGGCTTTAGAGCCTAAGATGGTGGTCTGGATGAACCCGA  
CTCAGGTCTTGATGTCGATGCTTTGAAAAGGATTTGTTCTGTTTTACAACGCTATCGTCAACAGCATCCT  
GAGACCGCTTTTTGTATCGTAACGCATAATCCTAGGTAGGTGATCTCCTGCAGCCAGACCATGTACATA  
TTCTTTGAAATGGACGCGTTGTCTTTCCGGAGACATGCATCTTATGGAAGAGCTAGAAAGGAAGAGTTA  
TCAAGAATTATTAGATGTCGTTACCCAGGAGTAAACTATGTGGGGGACTCATCAGCAGAGACAGATTCAT  
CCCGATGCACGACTGGCAGACGTTACACGCTCTGTATGGCGTCAGTATCAACGCGATCACGTAATTCGAG  
AAGCTTGCTCCTGGTTGAAGGAAATGACACAAGAAGATTCTTGGATCTATTGTGTAGGAGGATGTGAGAT  
TGGAGCCAATTCCTGAAGAGAGATCCGCAACTTGTGTATTTGTAAATGGATGTTTTGCCTTCCTTA  
TCTGTATTGCCTGCAGAAATCATCGTGGCCCCTTTACGCGAAGCGCGTGTCTTTTTCAGAAGCACGATG  
AGGAAGATGTTGTAGAAGAGTTGCATTCCTTACTTCGTGGAGAAGAAGGGACAGTTATCTATATTCCTGA  
AGGTAGAGAAGCTGCAACACCCTTATTTGTACAGCATCACTATGTCTGTAGCGAGGAAATAAGAAG  
ACGGTGAGCGTCCCTATATAGTTTGTGTTTAGGGAAGGGAGCTGCCAATTCGATTGAAATGGGAATGT  
CTGCCCTACCGGATAACGTATATCTTTTGGAAAACGCTCTGTTCTAGGCGAGGAAGCAGAGCTTGT  
TTTGACCATGAAGCCGCTTCTTAAAGGACAGAAAAGATCATATGGGCTCATCATGTAGAAGTCGAACGA  
AGAGGGGCTTGCGCATTGATCCAAGACATGCGTTCAATGGGAAAGGCTGGTCCGGAATAGCTTTTCT  
TGAAAGGAGAAGCTGCTCATGGAGAATCTCTAGTTAAGGTATTAGGTGGAGATTTCTAGGTGTGCATAA  
CACGATGCATCATGATGACCGAGAGACTACTTCGCGTCAAAATATTCGCTCCATCTTGAAGAGGGGAGC  
TTCTCCTTTGAGGGAGGCATCTATATTAGTCTCGCGGGACGCTATCTAATGCTTATCAGAAGCACGATA  
CCCTCTTATTAAGTAATCGAGCTTCTGCATCCACAATTCCTCGGTTGGAGATTCTCACTGACGATGTAA  
AGCTTCGCATGGAGCCACTGTGGGCTCTTTAAATGCGCACCTTTGACCTATCTTCGATCTCGAGGATTT  
AGTTTAATAGAAGCAAACAGGCTCTACAAAAGAGCTTTTGGACGTTAGATATAGAGAAACCGTATTTCC  
CAAACTGCAGAAAAGGATCTTTACCATGTATAATGTGAAAAGACTTCCCTATTTTAAGAATCAGG  
GGGATCCTTATGTTATTTGGATTCTGCAGCTACGACACATAAGCCTCAGTGTGTGATTGACTCTATAGT  
GGATTACTATAGTTCTTCATATGCGACTGTAAACCGAGCTCTTACACAGCGTCTCATGATATCACCTTT  
GCACATTTGGCAAGTGCCTTCAAAAGTAGGTTCTGTGGATCGGAGCGCAATATGACCAAGAAATCATTTTA  
CCAGGGAACTACATCTTCACTGAACCTACTCGCTATTGCAGCTAACGATAGTTGGTTAGCTGGAGGGAC  
GGTTGTGATTTCTGAGGCGGAGCACCATGCTAATCTCGTATCATGGAACTCGCTTGTCAACGTTCCGGA  
GCTACCAAAAAAAGTGCCTGTGGATGATGAAGGATGGTAGATTGTAACCATCTCGAGCAACTATTA  
AACAAGGCGTACAGCTGGTAAGCTTAGCTCATGTGAGTAATGTATCGGGGCGAGTTCTTCCCTTGCCAGA  
AATTGCTCATTTAGTGCACCGTTACGAGGCTTTATTTGCTGTAGACGGAGCTCAAGGAGTTGGGAAAGG  
CCTCTTAATCTTCTGAATGGGGAGTGGATTTCTATGCCTTTCTGGTCATAAGCTGTATGCTCCTACTG  
GAATTGGTGTCTATACGGCAAAAAGAAGCTTTTGAATCGCTTCCCTCTGTTGAAGGAGGAGGCGATAT  
GGTGATCGTATATGATTTTGAAGAGCTGTCGTATCAAGAACCTCCGTTGCGTTTCGAGGCGGGACTCCA  
CATATTGCAGGAGTATTAGGATTAGGTGCGGCGATTGATTATTTGCAGGCTCTTCTTTTCGATAACAG  
ATCGTTAACAGAGCTTACTCAATTCATACGAGCAGCTACTTACAGTTCCAGGTATTAGATCATTGG  
CCCATAACAGGAGCTGCACGAGGTTCTCTGTGTAGTATCAGTATTCCTGGTGTGCAAGCTTCGGATTTA  
GGTTTTTGTAGACGGGAGAGGGAATTCCTGACGTTCTGGGCATCAGTGTTCACAGCCAGCTATGGTGC  
GTTGGGATTTAGGACATGTTCTGCGAGCCTCTTTGGGTATCTATAATGATCAGCAAGATATTCTTCTTT  
CGTAGAAGCTTTGAAAGATATTTTACGAGCATATCGTTCGTAATGCGCTTCCGTTCCTCAAGAGAGATGCG  
GAGTGGGCATCTCTGATTTGTCATTATAAGATTTGTATCTTGAGTTTTGTATTCTGAGGACTGTCTGT  
AGAATAACAAGAAATGGGCTGTGAATTAGAAAATATTGTGAGTAGATTACCTAGCGAAGATACACTTTT  
AGAAGTGAATATAGAGGACATCCGGGTCAGCCCTTTTCAACCTCGACGTACAATTCCTTGAGGAAGATTTA  
AAAGAATTAGTTCCTTATCAAGACGGTAGGACTGATTCATCCTCCTGTAGTTAGGGAGATCCGTAATG  
GGGATAAGGTTTGTATTATGAGTTAATAGCTGGTGAGCGTCTGTTGGCGCGCTTGCATTAGCAGGATA  
TAAACGGTCCCTGTTGTTTTGAAGCAGGTGCTAGCTGATGATATGGCAGCAGAGGCGACTTTAATAGAA  
AATATCCAAAGGGTAAACCTGAACCCCTTAGAAAATGGCAGAAGCTTTTCGACGTTTGATTGTTGTTTGT  
GTCTTACCAAGATAAGGTTGCTAAAAGGTTGGGAAGAAGCGTTCGACAGTAGCTAATTATCTGCGTTT  
GTTCTCTTCTCAAGAGGTTCAAAGAAAATGAACCTGGAGAGATCTCTTTAGGGCATGCCAAAGTC  
ATCTTATCGTTGGAAGATGAAATCTTAGACAGATTCTGAGTCAAAAATTATCTCTGCAAGTTAGCAG

TACGCGAGGCAGAGATGGAGGC TAAA CGTCTAGT GAAAGG TAAA GGAGCTTC TTTGAAA GAAGACAGTTC  
TTCACAACCTTCTTCTCGACTAGGGT TTTGTCAAGAACGGTTAGCAACAACC TTTG GCTATCCTGTAACG  
G TAAA GCCTCAGGGAAGACGCATATGCGTATCATTT TTTGTAGAAGGAGAGGAAGCGTTAGAAGC TTTGG  
AAAAAGC TTTAACAACATCTTCTTCTGAAGCTATCTTAACT TAAA GGAACCTGCACGTCTCGGCGTCCCT  
CGG GAAA TTCAGGTAATTGTGAATGGAGCAGCATTCGTGTGTAGGAATGCTGCGGATTA CAAA AGA TTTT  
TTCCGTAGCCCCAGTCTCTACGATCTGCC TTTG TACATGATAATGAGTTCCGAA CAAA ATGAACGGACG  
ACTGCAAGATCATGG GAAATAAA TAAGTAGGTGAGTCGCGCTTGTGCTGTAACGAAGTTAGCATGTTCA  
GAATCTGTGCTTGCATAGATAGATC TAAAGCAGAAA CA TTTT CATCACAGATAATCAGTTGTGGGGCTCC  
TAA CAAA GCTCTAGCAATAGAGATGCGTTGTAGCTGTCCCCCAGATAACTGGTGTGGGTAAGAA TAAAGG  
TAATCTGTAGAGAGCCCCACCAGAGA TAAAGCTT TTTT TACTGTAGCACCAGTTCTTC TTTAGAAACTA  
AA CGATGATAGAGTAGGGAATGACTTAACTGTC GAAA ATGGT TTTA CGCGGATTTA AGGATGAGCGGG  
ATTTCT GAAA CACCATCCGCACCTGAGAATAAGATATTGCCTTCTTT TTTA TTATGTAGAGGGATGGCC  
TTGTCATTGAGTATCAGATGGCCAGAAGTTAATGGAATGAGCCCTGCAAGCCCCAGAGC TAAAGTAGTTT  
TCCAGATCCAGACTCTCCTATGAGACCGATAAT TTTA TGTCTAGGAAGG TAAA GGACACCTGA TTTAA  
AGGCGTAGTAGCCACTTT TTTT TTCT GAAACCA GAAA GATCGCTTGTAAATAATG TTTAGTCAAGCGGCTT  
GCTTGGAGGAGAAGAGGATTATTCATGTAACCAGCACCTCACACGATGATGATCA TTTAAA GATAGGGAG  
TCCGGGGATT TTTCAAAG CAAA TAGGCTGAGC TTTA CGGCAACGAGGAGAATAGCAACAGCCCTTAGGAA  
GTCTTGTGTAATGAGGAGGCTGTCTGCAATAGGAA CAAAGGCTGCTGTCTATATTTGTGAAGGACGAGA  
AGCTAAGAGATCTTCTGTATAAGGATGGGCAGGAGAAT GAAA GATCTCTTGGACAGAAGAATATTTCTGCC  
ATACGGCCTGCGTA CAAA CAAA GACATCGTCAGCCA TTTT GGCAACGACTCCCATGTCATGAGTAATGA  
T TAAA AGACTCATCCAGTTTTTT TTTGTAATGT TTTAAGCAGTTGTAGAATTTTGATACTGCACA GAAAC  
ATC TAAA GCCGTTGTGGGTTCTGCTGCTATTAATAAGTCTGGAGAGGTCAGCAAGGTCATAGCGATAGCC  
ATGCGCTGAAGCATTCCTCCAGATAACTCGTGAGGATACAATTTA ATGCAACGCTCAGGATCTTGAATC  
CTG TTTT CCGCAATACAGCTAACA TTTGCTCATGAGCCATTTTA TTC GAAA TTCCTAAGTGTGTGCGAAT  
GACTTCATGGAATTTGTTCAATAG TAAAAACAGGAT CAAA GGAAGCAAGAGGATTTCT GAAAAATCATA  
GAGATT TTTGATC CAAA CAGGAC TTTTGCATTTG TATTCTTACGATCGAGGAGATTTCT TTTAT TAAAAA  
GAGCCTCTCCT GAAA GAGAAA AGCTCTCTTCCGGGAGAAGCTGCATAAGAGATTGTGCTGTAATGGATTT  
CCCTGACCCTGACTCCCAATAATAGCCAGAG TTTG GCCTGG GAAA ACAT CAAA GGA CAAA GAGTCCACA  
GCTA GAAA ATGATACAGATTTTCTA TTTAGAGATACA GAAAGATT TTTA ACTTGCAGAAGCGGCTGAGCAC  
ACATAGCTATGTATCTCCTACTA TTTGAAGGGGACCTCGAGCGT GAAAAATCTTA GAAAAAAA CAAAAA  
TTTTGTTCTTAGTACATTCTAGATTG CAAA TATATATATGAAGGAGGTATAT TTTGGGAGCATT TTTTCT  
CAAA GACAAT TAAA AAAGGCTTATATGCAAGTCTTAGCAAG TTTA TTCGGTCAATCTCCTTTTGCTCCAT  
TACAAGCACATTTA GAATTAG TTTT TTCGACTATCAATGTTCT TTTTCCACTTTT CAGCGCTCT TAAAGA  
AGGCGATTAT GAAA GGGTTGGGGTGTGGCTCAGCTCG TTTTCT CAAA AGAACGGCAAGCTGATGGTATG  
AAAAACGATGTAAGAAGACACTTGGCTTCGGGAGTA TTTTCTTCTGTATCGCGCGCAGCGCTGTGGAGA  
TCAT TTTT GATACAAGATTCCTTAGCAGATTGTGCTGAGGATATCGCAAT TTTTGTGACAGT GAAA GAGCT  
GCAGT TTTTATCCAGAA TTTT GAGGAGTTGTTCTTCGAG TTTTCTG CAAA AGACTGTGCAATCTTTT GAAGCT  
GTTG CAAA ACTATACGAGAGATGGATCGCT TTTT GAATCTTCT TTTT CGGTG GAAA TCGGGCAGA CAAA  
CTCGTGT TTTA AGTGAGTGAAGTATCTAACCTTGAACATGAGTGCATTTA TTATGCAGAGGGAATTAATGAA  
GGTATTCTTCTCTGACGAT TTTT CTATAGGGA CAAA AGGATTTT TTTCTCTGGATGCAGATTATTAAGGGG  
ATATCGGGGATATCTAATAATTCCGA GAAACTAGCTTATCGAGTGAGTATGACGCTAGAAGA GAAA TAGG  
CATGTGGTTGCTGCTGG TTTTGTGTAGTTGTAGGCGGATTCTACACAGCTTGGAACATAGGCGCTAATGAT  
GTAGCGAATGCTGTGGGACCAAGTGTAGGAGCCGGTGCCTAACTC TAAAGCAAGCCGTTCTTATTGCAG  
CCGTC TTTT GAA TTTT TTGGAGCAGTATTGTTAGGAGATCGAGTTATCGGCACCATA GAAAGTGGGCTGGT  
AGCTCCTTCCGGTCATGTGTTGTCATCCCAAGACTATGTCT TTTTGGATGGCTGCAGCGCTTCTTGGCCACT  
GGCGTGTGGTTGCAGATCGCTTC TTTTCTGTGGATGGCCAGTGTGCACAACGCATGCTATTGTAGGCGCAG  
TGTGGGCTTCCGGTATCATCCT TAAA GAGGATGCGGTTATCTACTGGAATCTTGTGGCCGAGTG TTTTGT  
CAGCTGGTTAGCATCTCCATTATTTGGAGGATAC TTTTCTTTTCTCATCTTCTCT TTTATTCC GAAA GCT  
ATCCTATA TAAA AAGGATCCCGTCTCTGCTATGGTGCATCGCGCCATTTT TTTA TCGGCGATCATTATT  
TTG CATTAGGACTAGTCTTATCTTCTGAGTGGTGCAGTTGCTCCCGTTA TTTTCTTTTCTCCAGCGTTGCG  
TATTG TTTTGTGG TTTA TCTCTT TTTTCTTTT TTTTCTTACGATATGGGGAATACGCTTCT TTTAAA CTGCG  
ATTTCTCCTCAGGAAGTTCTTCTTGGAACATTATTAGATCGGTTGTTATC CAAA AGCACCGATTATGGGC  
GTAAGTATCTTATAGTTGAACGCATT TTTTCTTACTTACAGATGATCATTGCATGC TTTTATGTCT TTTTGC

GCATGGATCCAATGATGTTGCTAATGCGATCGCTCCTGTTGCAGGTA**TTT**ACCGGACACTCTATCCC**CAA**  
**AG**TATTTCTT**CAAAA**AGTTCTCTTAGTG**TTT**ATGTCT**TTT**GGGAGGACTAGG**TTT**AG**TTT**GCGGATTAGCAA  
CATGGGGCTGGCGTGTGATTGATACTATCGG**GAAA**AAAATTACAGAATTGACTCCATCACGAGGCT**TTTC**  
CGTAGGAATGAGTTCGCTATCACTATAGCGGCCGCTTCCCTTAGGATTCCCTATATCTACTACGCAT  
GTTGTTGTAGGATCGGTATTGGGGATTGGGTTTCGCAAGAGG**TTT**ACGAGCCATTA**TTT**GCGGATCAT**TA**  
**AA**GATATTGTGC**TTTC**GTGG**TTT**ATTACAGTTCTGCTGGAGCGGCG**TTTC**TATCGTATTTTT**TTT**GTT  
ACTGCGCGCACTAT**TTT**GTTAAGCGCAACTCTCTATATGCAGACTATATGCAGAC**TAAA**AATGT**TTT**GTCT  
TGAGCGATTCTTCATGTGGCACTGAGA**TAAA**GGCTTGAGT**TTTC**C**TTT**GCTTAGGCCATA**GAAA**AT**TT**  
**AG**GTAAAGGATCAGATAAGCATGGA**TAAA**ATTATCGATAAGAGACC**TTTC**TCTTGAAGG**GAAA**AAAGTACT  
AGTTCGTGTAGAT**TTT**AAATGTTCTTAT**TAAA**GATG**GAAA**GAT**TTT**AGATGATGTGCGTATTTCGTAGCGCA  
ATGCCACGATCCATTATCT**TTT**G**GAAA**CAAGATGCAGCAGTCAT**TTT**GGTGAGCCA**TTT**AGGACGCC**CAA**  
**AG**GGAGGCGTAT**TTT**G**AAG**AGGCATATTCATTAGCTCCTATTGTTCCCTGTGCTAGAGGGGTAT**TTT**AGGGCA  
TCATGTGCCTC**TTTC**TCCAGATTGTATAGGAGAAGTCGCGCGACAGGCGGTTCGCGCAAC**TTTC**TCCTGGT  
AGAGTTCTTCT**TTT**AGAGAATGTACG**TTTC**CATAAGGGGGAAGAACATCCTGACGAGGATCCTAGT**TTT**G  
CTATTGAGCTTGCTGCTTATGCAGATT**TTT**ATAGTGAATGATGC**TTTC**GGGACATCTCATCGTAAGCATGC  
TTCTGTATATCGGGTGGCACAACCTATTCCTTGACCGGGCAGCCGCAGGCTTCCCTTATG**GAAA**AAAGATTA  
GAAT**TTT**GGGCCAGCATCTATTAGTTGAGCC**TAAA**CGTCC**TTTC**ACTGCTAT**TTT**AGGAGGCGC**GAAA**  
TGCTTTC**GAAA**ATAGGAGTAATCGAGGCGCTAC**TTTC**GTGCGTGGATCATCTCGTATTAGCTGGGGGTAT  
GGGGTACACCTT**TTT**AGGGCTATGAATCGCCAGGTAGGGAATTCATTAGTGAAGAATCAGGGATCCCT  
**TT**AGC**GAAA**AAAGTATTAGAG**GAAA**GCTCAAGCTCTGGGGGTGAAGATCCATCTTCCAGTGGATGCGAAGG  
TCGC**TAAA**CAGTGTGACTCTGGAGAGGATTGGAGGAGCTGTCTATACAGGAAGGAATCCCTGAAGGATT  
AGCAGGT**TTT**GATATTGGGGCACAGACAATAGAACTAT**TTTC**TAAGGTGATTCAGGAGTCGGCAACGATA  
**TTT**TGGAATGGTCTGTGCGGGTATACGAAGTCCCTCCT**TTT**GATCAAGGATCGAAGGCAATAGCACAAT  
GTCTCGCGAGCCATTCTTCTGCTGTGACTGTGGTTGGGGGAGGCGATGCGGCTGCTGTAGTAGCTCTTGC  
AGGGTGTACTTCACAGATCTCCACGTATCTACAGGGGGAGGCGCTTCCCTTAGAATCTTAG**GAAA**AAAGGT  
AGTCTTCCCTGGTACG**GAAA**ATACTATCTCCAGCT**CAA**AGCT**TAAA**TATCTGCGTATGCATTCT**TTT**GTTAATG  
**AAA**AGCCCTG**TTT**ATCGGGGCTTTTT**TTT**GTT**TAAA**AGGAGGTCTGAATTCGAGA**TTT**AGAATGATTAAG  
ATCC**TTT**G**CAAAA**AAAGATAACTCTTAACCCCATTTGTT**TTT**AAATTAATTAG**GAAA**CTAAT**TTTC**GTTTCG**TTT**  
**AAA**AACAGAACAATTTGTT**TTTC**T**TAAA**AAGAAGTT**TTT**AAAAT**TTT**AA**TAAA**AATAGTTGGAAT**TAAA**AGT  
TATTGCTTCGGCGGAGGAT**TTT**ATGAGTATTTCGACCTACTAATGGGAGTG**GAAA**TGGATAACCCGTCTATTA  
ATCCTTCTAACGATAATCAAGACGGTCTTGTGCAATCGACCTCTGGGCCTAATTACGGAGGCCATACGGT  
ATCTTCTCGAGGAGGAT**TTTC**AAGGGATATGCGTACGAATAGCCGA**TTT**ATTCCGTAACGT**TTTC**TCTCGT  
AATAGAGGCACTACTCTCCATCTCGACCTGTTATCACTCAGGCAGATAT**TTT**ATCATCCGACTAT**TTT**TG  
GACAAGGAGCTCAACCTATTGTCTCTACAGGAGATA**GAAA**ATTAGATAGCGCAATTATTCAAGCAGAT**TT**  
**G**CGTGCGCAGAA**TAAA**CAGAC**TTT**GCTACACATATT**CAA**AGTAAGCTAGGTTCTATGGAGGGACAATCT  
CCTCAAGATTAT**TAAA**GCTGGTGGTATAGTGCGCTAAGATTGATGCTG**TTT**ACTCCAGGC**GAAA**CTACTG  
TGAGTAGCGAGCGGGAACGTCAAGCGTGCCTACGGGTCGGGATCTCTGGGAACAGGCTGCAGGAGATCT  
TGCTACCAATGGGAATACAGATGGGCTTATGTTAATGGCTAACCTATCTGTGGGAGGGAAGCATGTGCCT  
GCAGGGCA**TTT**AGAGAATACATGAATACTG**TAAA**GGGTACG**TTT**ACTGATGAGAACGAGGCTACAGATC  
CTACGGTAGATGCCAT**TTT**AGAT**TTT**AGCAG**CAAAA**AATCGATGCGACGGAATCTCTAGTCTTGGTTCAGG  
GCCAGTCATTCTTAATTATATAG**GAAA**TTGTGGACAAGTTCGT**TTT**AG**GAAA**ACGAGAAGATGAACCAGCTT  
GT**TTT**AGAAGAT**CAAAA**ATGGGCAAGATCCTCAACGTGTTCAAGATAACT**CAAAA**AGAGTTA**CAAAA**AACTGT  
TAG**GAAA**ATGCTC**GAAA**AACAGATCCTGAGTTATA**TTT**CC**CAAAA**CACTAACTGTCATAACTTCTTCTGT**TTT**  
**C**TTAGAC**TAAA**GAGAAGGTATACGGTGTTCGGTCC**TTT**CAACTATTAAGAGGAAGTAGTAGTGAGTAGCA  
TAAGCCCTATAGGGGGGAATTCTGGGCCAGAGGGAT**TTT**CTAGTGCATCTCGAGGCGATGAGATTGATGA  
TGTACCAGATAGTGAAGAGGGAGAGCTAGAAGAGCGCG**TTTC**GGATCATGCAGAGTCTATCATTACCGAG  
AGCTCG**GAAA**ACGCTG**TTTC**GTACTACTTCTTCATCAGGGGTCAGTGAAGATCTTCAGCAACACGTTAGCT  
TGGAGGAATCTCCACGACAACGAGG**TTTC**CCTGGACGGATCCGTGATGCAGTAGCTTCTAT**TTT**GGAAGCG  
TCGTGTTGCACGAAGGAAT**GAAA**ACTATGATGT**GAAA**AAAGCAGAAGAGCAGCAAGGGATTGTGCAATAT  
CTGCAGGATTC**GAAA**ATGCCTGC**TTT**ACGCGTGCCTATCGCCATCTCCGTGC**TTTC**AATTCTGCATGCT  
TACGTACGATTCGTGAGTT**TTTC**GCTACCATT**TTTC**GTGCT**TTT**AGGGATGCGTATTATCGACATTGTAC  
ACGTTCTGGGATCAACT**TTT**GTTGGAGCTGAT**TAAA**GACTC**TTT**AGAAGTTCTTGTGCGGTGGG**TTT**GCT**T**  
**TT**GCGTATGGCTACCTTACGCTCT**TTT**GAAACATGTGCGTGGGAATTACGAAGATCGATTAG**TAAA**TAATG

ATGCTCCGGTGACAGGTGCGGGGAGAACTCTTGTGATGATGCTGTAGACGATATTGAATCGATTTTAAA  
TACGAGAACCAACTGGCCTCAACATGTCATGATAGGGTTTTCCTCGTGGTCTCGTTCAATTATGTGCGACT  
CCTTATAATGCGACTTCTCAAGAATGTTTCAAGTCGATTGTTTCGTTTAGAAAAAGAAGACCCCTTCTTCAG  
ACTATTCTCAAGCTTTATTATTAGCAGGGATAATAGATCGCTTGGCGGAGAAA GCCCCTATGGCTGCAAA  
GTATGTTTGGATGCATTGCGTGTTCGAACTTCGGAGCTCATAGGAGAACTCATTATTCTCGATTTGCTT  
CCTCCTGTATGGAAGTTGGCCGCGGAGGCGTATTCCTCCTGTGAATGAGCAGCTCGTTGTGCAAA TTG  
TTAATGCAAA CGTAGAACGATTGCATTCAC TTTGCTCATGAGCCACAAGCTTA TTTGCGTATGATCGA  
AGGTTTG GTAACCAA TTTCTTTTTC TTACCTAGCGAGGAAGATCCTTCTTCGGTTGGGAATATCTAAGAA  
CATTTTCTAATAGGGAAGAGGATAAA TAGCGT GAAA TAATACTGATTATGTGAAGAATAGG CAAA AAGAC  
CTAAA TCCTTATATGCTATTAGATTCTCG TTTCCCTACAGATTATTA TTTA CGTATCCTAGAATTAGTCA  
TCCGGGATGCTTCTTG TAAA ATTGGTATATAACCGACGCCTGCATATGTTGGAGGCGATCCCTCTTGAT CA  
AAAC TTTCTACTGATCAAGAGGGGAATCAAGTAT TTTACGAGAAGTGATTAGCGAGCTACTTGCGCAT  
TCTGGG GAAAGTTATGCGA TTTCACTCAATTACTTGCCGTAATCGATA TTTATTTAAA ACAAGAGCAAC  
CGTCGAATTCATGGTTCGCTCGAATC TTTGGAAGAGAGAGCGGGCTA GAAAACGACAAA CAATTAATAA  
GTTGCT TTTGT TAAA AAGTATCCTATTT TTTG AACGCCAACGGCCTGTTAAGAAGGTGCAATCGGTTGCC  
GATTCTAT TTTACAGAGAT CAAAAG GAAATTTTTC GTCTTGGGACGAT TTTA CACATGATGTGCAGACTC  
AAAAATCTGGTAGG GAAA CAGACATGCCAGATTCATTGCGAGGACGAGTGGAAAGAAGATGCTGCTTCGCA  
AATGATCGTAGAGGTTCTGCTAGCCTT TTTAGATAATCAAGATATGTACCTCTCTGTAAGTTTCGAAAT  
CTTC GAAATTT TTTAGAAGAGAAGGTGTTGTC GAAA AGGAGCTTGTCTCCGCGTAGTCACGAGGCAATTA  
AGAAGA TAAAAGATTTGTAT TTTAGTCAAGCCTGAGGATTTCCAAA CGTTA TCGGAGGCGTGATTACCGA  
ATCACTCTTTTC AAGAGGAAGATCAACTCGTTGTAGGATGTATGAT TTTCTCTCAGGAAGGGAGAGA ACTT  
TTTGATTCCTTG GAAA GGGATATCACAGACATACCACATGATATGCTCTATACGCAAGCATT TTTAGCAG  
AAGTTGTGTTGCACGTGGTGCAACACCACATTCA TTTAAATG CAAA GGT TAAA CTTACTTCCCAGAGCA  
GGTAGGCAGTCTGTACAGCATTAGAGACCATAGTCCCAAGCTTGGGCAAGGATGATGCGAGTGTTATTA  
ATGCGCTGGTTGCTCGATTATCAT TTTGATGTGTATGCGCACC TAAA AGAAGAAA TTCTACGGTGCCCGC  
CACGACCGCCTT TTTG GCAA TGATTCCCTCGGAATCAGGAGATGGAAC TTTCCGTAAGGAAGCTCGTTA  
GTCTGTCTGTAAGAAA GAGCAGATAGGACACACATCGATGTTGTGGTGGAGCGCTGGACAATACGCTCTT  
GCATAGTAGATGAGTTG TAAATGCAA TTTCCGAGAGTGC TTTG GTC CAAAGA ACTGTAC TAAA TCTT TTT  
CTACAGCTGAAGGACTCCGTTTC GTAGAAAGTTGCCAACGATGTGCTAAGCGAAGGATATGTGTATCTAC  
AGGGAAGGTAT TTTCTCCGTAATAAA TGCT TAAA AAAACAGAAGCTGTT TTTCTGCCTACTCCTGGAAGA  
GCTGTTAATCTGGAAGGGTGTGAGGAGTTCTTGTATGATAACGATCCACAAGAATATGTGATAGAGCAT  
GAATATACGCAGCT TTTGCGTTCTCCTAATCCACAAGGAGCAATGAGTGAATAGA TTTCCAGAAGGAGCCAG  
CATACTCATAGATTGTGCATCTGGTGC TTTAG CAAA GAGAGAGGAGTGACAGAGTTCCACAGCT TTTG TCT  
GTCGAA TTTCCAGATAAA AGGATAGCAATGAGGAGTT GAAAGGGAG TTTGCCATCCTGT TAAA GAAGGCG  
CAGGATTAGG GAAA AGACGG TTTAAA GTAGAGATAA TAAATGCACGCTTAGCTGTACATTTA GTGACTT  
CATAAGAGGTTAT TTTCTATACAAA ACTTGCT GAAA ATTTCTCCTAAGACATTCTCAGTGACTTCGGAT  
CCAGATAAA TTGCCTATAGAATG CAAA GCTTGTGCGGAGATC TAAA GCGATACATTCAATTAGGAAGATGTT  
CTGTAAA TCCATTCAACGCAGCTGTTAGGCATGTA TAAA CCGAATGAAGCAAGCTGTGATGGCGCGCAGA  
GACTAAA AAGATCTTAGAAGAT TTTCTA ACTGCGTAGTATTGAGCCATT TTTG CAAA GCTTGT TTTAAT  
TCCAGCAATCCTTCTCCAGT TTTAGCAGATACA GAAATTTGCTG GAAAGGAACCTCTA TTTGAGGAGGAG  
ATACGATATCACACTTATTC CAAA GTAAAATGGTGGCT TTTGATA CAAAATAGTAGGGAATTCTGGAAG  
TGGCTGCGACGCATCCACAACCCAGAGAATTCCTTCTGCTTGACTCATGGCTTCTCGGGCACGAGCAATC  
CCTTC TTTCTCAAC CAAAT TTTCTG TTTCTCTTAGACCCGAGAATCAATGAGACGAAGATT TTTCCCTT  
GCAAGACCCAGT TTTCTTCAAATATCACGAGTTGTCCCTGGAATATCAGTGACAATCGCTCGGTTTTT  
TTGAGTGAGCGCAT TTTAGGATGGATGAT TTTCTGCA TTTGGAAGCCCTGCTAAA ACAATACTCGTTCTT  
TGAGCCAGACGTTGTCCTTCAT CAAA ACTAGAAA GAAGCTCGTCTGTGATAGATAGAGCTTCCATAATTC  
GATG TTTAGGGAGCGAATCTTCAG TTTCTATATCTTCTCAGGGAAGTCTGCTAAGACTTCTATATAAGC  
AAGAGCTTCTATAAT TAAA GAGGAGATAGAGGAGATCGCTTGAGAAGTATGCCCTTGGAAATTGAT TTTGA  
GCTATAC GAAA AGCATCGATATTATCAGCAGCGATTA ACTGTTGTATGGCTTCCGCTTGAATAAGATCGA  
TTTTCCATT CAAA ATGCACGTTGC GAAA ATTCACCAGGAAGTGTGCACGAGCTCCCTCCGCTAATAG  
AGCG TTTACAATTTGGGAGCAAG CAAA GTAACCTCCATGGCATT GAAA TTCTACGATGTCTCTCCCGTG  
AAA GATCGCGGGGCGCGCATCACTAAGACTAACGCTTGATCAATACAGACAGCATTATGGGATACGGTGC  
CTAGGTGGGCTGTATGTGATGCGTAACCCGCAATGTTGCCA GAAA AAATACGATCA GAAATAGAAA TAGC

ATCCGGTCCGGAGACGCGAACAAATAGCAATACTTCTTCTCCTGGAGGAGTTGCAATAGCTGTGATCGTA  
TCA**TTTC**GAAGCATGGGTAGCAGCC**TTTAGGC**TAAATAAAGTGCT**GAAAAG**GAAAATGATTATACT**TTTGG**  
ATGATC**TTTC**TAAGCAAGAAGGGCTAATCGAA**GAAA**GGCGGGTGTTCATATA**AAAA**AATT**TTTAAATAAAA**  
GAAGCTTTTT**TTTA**GGAGTTCGGTATCCT**GAAA**GGG**TTTGTGT****TTTG**GAAAAG**GAAA**CTTCT**TTA**TAGT  
TC**TTTA**TGCT**TTTGTGTG**TAAAAGGCTTCTATAAGAAGAG**CAAA**TCAGCCGCTTGCAGAGCAGGAGATAAG  
CATGGCAGCGCGG**GAAA**TGTTATATGTTAATCGC**GAAA**CAGGGAAGGTAGAACAGGAACGTATCATCTGT  
TCTTCTCTGG**TAAA**GTTT**TTTA**TT**GAAA**CGAGAATAGGGAGAGCTCTGTACTCTGT**TTTA**TGTAAGAATA  
GCCTGT**TTTC**CCGTATCGTAGGCTGGTGT**CAAA**GACTGCGAGTGACGCGATAT**TTTA**TT**TAAA**CC**TTTC**GT  
TAC**CAAA**ATATCGTA**TTTG**CATAGAAGAGAGTGCTTCTCCTCTGCACGACTACGCGTCA**TTTA**ATGATTTT  
**TTTG**TAC**GAAA**ACT**CAAA**CCAGATGCTCGACCTATCTGCCAGGGAGAGGATATCTGTGTGACTCCTGCTG  
ATGGTGCCTATCTTGT**TTTC**CCTTCCATGGCAGATCTATCCTTG**TTTA**CCAT**TAAA**AATAAGCCGT**TTTC**  
**TTTAGAAA**GTTT**TTTA**GGGGATCCGCAATTGGCTCACCAATATGCGCAAGGGAGTATGGCAATCGCTCGA  
TTAGCTCCT**TTTG**GATTACCATCGCTTCCAC**TTTC**CTATAGCGGGTATTGCTGAGGCACCGCGCCGTATCA  
ACGGCCATCTTT**TTTC**TATTCATCCTCTTATGCTTAAGCGGAA**TTTC**GAAGTG**TTTA**CGGAGAA**TAAACG**  
CG**GAAA**TTACCATAATTACGT**CAAA**AGAG**TTTGG**TGAGGTTGCC**TACGTGGAAGTAGGGGCGT**TAAATGTG  
GGTTCATCCAC**CAAA**CGT**TTTC**TCCGGTAGTTATGT**GAAAAA**AGGTGCC**GAAA**AAGGTTTT**TTTGCT**  
**TTG**GAGGATCGACTGTGTTCTATTA**TTTC**AGCCCAACGGATTATC**TTTG**ATGCAGATCTAGTTGGTTA  
TTCTGCTCAGGG**TTTAGAAA**CCCGGTGTCGAATGGGACAATCGTTAG**GAAA**ACG**TTTC**TCTTCA**TAAAAA**  
**TAAA**GACT**TAAA**ACGTTTTTT**TTTG**GTATTGCAAGAGAGAG**GAAA**ACTCAGAAGTTGTGCATTATGTGGCTA  
ATCGTAGCATGGACACTCTTGGCTTGC**TTAGCGATGGC****TTTAGTC****TTTAAA**AGCTTATAGGCATGTTATCA  
GCTTCCGCAGCTACGTGAATCAAGTGATGCGGGATGTGCGCTTGAGCGTAGAT**TTTAAA**AGAGTGGCGGT  
CGCA**GAAA**TGCGCTTGGCCCCGATCCT**GAAAAA**ACGTCAATATCGACG**TAAA**TAT**TTTA**TCGAATATATC  
CGTATTCTTCGAGAGCTCGAACGT**TTTGA**AGAAGCT**GAAA**AGCT**TTTGG**GAGAAGCTAAG**GAAAT****GAAAT**  
TAGCAGGCGCCATTT**TTTC**TTAGAGGTTGCACATAAGGCT**TTTC**CGGCATGGCGCCTA**TAAA**AGAGCTGC  
ACATGCTT**TTTC**TCTT**TTTC**CGCTGAGCTTATGGCGAGCGAGAGGTCGCTCGCTACACCAT**TTTC**TCTG  
GTATATCTTGGAGAAGTAGATGCTGCTTGTGCGATCATTGAACCATGGATTGGTCCACTTGTCCACCAAG  
AAGTC**TTTA**ATTAGCGTAGGACATATCTAT**TTTG**CGACGAAGCGCTATGCAGATGCTATCGA**TTTC**TATCG  
ACGTGCACGGTCTTAGGATCTTGCCCTATCGATGT**TTTG**TACAAC**TTAGCACATTC****TTTGC**GTAT**TTTGC**  
GGCAGTATGTCGATGCTGGGATGCTC**TTTAG**AGAGCT**TTTAG**GGGATCCGG**TTTATA**AAGACGAAGCGA  
TG**TTTA**ATATCGG**TTTA**TGTGAG**CAAA**AATTAGGGAATTC**GAAA**AAGGCTCTGCTGATCTAT**CAAA**ATAG  
TGAGTTATGGGTTCCGGAGATGC**TTTG**ATGATGCGGTATGCAGCTCTTGCGGCGCGGATCAGCAAGAT  
TATCAGCTCGCAGAGCACTGCTGGACATTAGCT**TTTC**CGTTGT**CAAA**GTTATGCTGATGATTGGAATTGCT  
GTGTTCA**TTAT**GG**TTAG**CATTATGCC**TTTAA**AGAAATATGCCGAGGCTGAGAAGGTATA**TTTA**AGAGT  
GATT**CAAA**AGACTCCGGATTG**TTTG**GTTGCTTGT**TAAA**GCAC**TGGCT**TGGCTCGCAGGAGTCGGACATGCG  
ACGATGAT**TTTC**TGCTCGAGAAGGAATAGCTTATGCTAAGCGAGCGCTGCAGAT**CAAA**CGATCTCCGGAAG  
TACTCGAGTTATTGAGTGCTTGTGAAGCTCGAGAAGGTAAT**TTTG**ATGTTGCTTATGATATTCAGGCTAT  
**TTTA**GCCGAGCGAGATACGACGGCGAAGGAACGTGAGCGACGGTCACAGAT**TTTGA**AGAAT**TTA**CGACAG  
**AAA**CTTCTTATAGACCAACAGCATATAGTAGAG**TTTC****TTTA**CTGCTAGCTGCCTAGCCTT**TTTC**TCTCT  
TGTAAGTAAGCCCAATATAAGATCTTAGCCCTCGTATTGCTCGAGTGCTT**TTTG**T**TTTC**TT**TTTC**TCTAG  
**GAAA**GTCTAGAATGTGCCTGAATGCACGGAT**TTTC****TTTC**TCTCGAGTAGCT**TTTC**CTGAGAGAG**TTTGT**  
GCG**TAAA**AAGATAATTAT**CAAAAA****GAAA**TAGAAAAGAACCATCCTTGTGTATAGGCGCT**TTTAAA**TAAG  
AGAGTAGGTT**TTTC**AAGAGCATGTATTGAACATATGATGGA**TTTC**CTAAGCGTTT**TTTC**GGATCCTC  
CCAAGAGAGAATAT**TAAA**ACGATTCAGAAAGTTGGTTGAAGAGGTTAATGCTTGCATGAG**GAAA**TTCTCG  
TCCCTGTCTGACGACGAGCTTCCG**GAAA**AGACCCCTCAATTGAAG**CAA**GATATCAAGACGGGAGTCAT  
TAGA**TAAA**CTTCTCCAGAGGCTTATGGAGTTGTTAAGAACGTATGCCGGCG**TTTG**GCAGGAACTCCGGT  
GGAGGTATCTGGGTATCATCAGCAGTGGGATATGGTCCCTACGATGTGCAGAT**TTTC**GGGTGCTATCGCT  
ATGCA**TAA**AGGC**TTTA**TCACCGAGATG**CAAA**CCGGGAAG**GAAA**GACATTA**ACTGC**AGTATG**CCGCTGT**  
**ATTTAA**TGCT**TTA**ACAG**GAAA**GCCTGTT**CATCTCGT**TACGGTGAATGATTA**TTTAG**CTCAACGAGATTG  
TGAGTGGGTAGGTTCTGTGTTGCGTTGGTTAGGATTGACGACCGGGT**TTTAG**CTCCGGGAGCC**ACCA**  
GAGAAGCG**TAAA**GCTA**TTTA**TCAGTGTGATGTCGTATACGGAACAGCTTCG**GAA****TTTG**GGTTCGATTATC  
TTCGGGATAATT**CGATCGCC**CAA**GAAA**AGAAGAGCAAGTAGGTCGCGGTT**TTTA**CTTCGCTATTATGA  
CGAGATAGATT**CGGTGTTG**ATTGATGAGGCTCGAACTCCACTCAT**TATCTCCGGG**CCAGGA**GAAA**AACAT  
AATCCCGTGTAT**TTTG**AAT**TAAA**AGATCGCGTAGCGGAATTAGTGTA**TTTCCAAA**GG**GAAA**TGTGCAACC

ATATTGCTATTGAAGCTAGAAAAGGTCCTGGATCCTTTTTTAGGAACCGATGTGCTTCCTAAGGATAAAA  
GGTTATGGAGGCAATCTCTGAAGCTTGTGCGAGCCTTATGGTTAGTTAGCAAAAGGAATGCCGCTCAACAGA  
GTGTTGCGTCGTGTACGAGAGCATCCAGATCTTCGTGCTATGATCGATAAAATGGGATGTGTTCTATCATG  
CCGAACAAAATAAAAGAGGAATGTCTAGAGAAGCTCTCTCTCTATATATTGTAGTCGATGAACACAATAA  
TGATTTTGAGTTAACAGACAAGGAATGTTGCAGTGGATTGAGAAGATCGGTGGTGTGCTGCAGAAGACTTT  
GTGATGATGGATATGGGGCATGAATATGCTCTGATTGAAGAAGATGCAACGCTTTTACCAGCAGATAAGT  
TAAATCGTAAGATAGCTGTTTCGAGAAAGGATACGCAAAGAAAAGCCCGAGCTCATGGGCTACGGCAGCT  
GTTAAGAGCACACTTATTGATGGAGAAAGACATCGATTATATTGTGCGCGATGATCAGATCGTGATCATC  
GATGAACATACAGGACGCCCGCAACCAGGACGTCGTTTTTACAAGGATTACATCAAGCGATTGAAGCGA  
AGGAACATGTAACGATCCGTAAAGAGTCGACAGCCTTCGCGACAGTTACCTTGCAGAACTTTTACAGATT  
ATATGAAAATTAGCAGGGATGACAGGAACCGCAATCACCGAATCTCGAGAGTTTAAGGAAATTTATAGT  
CTCTATGTGCTGCAAGTCCCTACA TTAAAGCCTTGCTTGCATATAGATCATAATGATGCCTTTATATGA  
CAGAGCGTGAGAAGTATCAGGCTATTGTTGCTGAGATCA TTTTCGCGCATCGTTCCGAAAAGCCGATTCT  
GATCGGGACAGAATCGGTGGAGGTGTCTGAGAAAC TTTCTCGTATTTTGGCGCAAAATCGTATTAATCAT  
ACTGTACTCAATGC TAAAACCATGCGCAAGAAGCGGAAATTATCGCAGGAGCTGAAAAGGTTGGCGCGG  
TTACGGTGGCTACGAATATGGCTGGTAGAGGGACAGACATCAAGCTGGATGAAGAGGCTGTGGCTGCTGG  
AGGACTGTATGTTATCGGTACGTCACGACATCAATCTCGACGATTGACAGACAGCTGCGTGGTCTGTTGT  
GCACGTTTAGGAGATCCTGGTGCTGCGAAATTTCTTCC TTTT TTTTGAAGATAGATTGATGAGGCTTTT  
CCTCTC CAAAACCTCAATACATTGATTCGCCA TTTTCGTCCTCCAGAAGGTGAGGCGATGTCGGATCCTAT  
GTTTGATCGATTGATTGAAACAGCG CAAAAGCGTGTGAAGGACGTAACATAACCATAACGTAAGCATAAC  
TTAGAGTATGATGACGTCATGAATAAAACAACGACAAAACATTTAAGCCTTCCGTAATGATGTACTTCATG  
CTGAAGACTTG TTTGTTGTTGCTAAAAGAGCAGATAGAACATGTTGCTTTTAGCCTTAGCC TTTCTGAT TTT  
AAAAGATGCTCATGCGGATCATTGCTCTTTTG CCTAAGATAGAAGAGTGGTTGAGTTATTTCGTTCCCTGTG  
AAGCTAGATGATCAGGAAATCCGTCGACTCGGTGATGTAGATGCGGTAGCAGACTACATAGGGGA TTTAT  
TAATAGAAGCCTTCGATGTTAAGTTCTCTGCGATGCTTGTGAG TTTACAGAGATTATTGGGTCAGCAGC  
AAATGCTCAGGGGATATGTAATGACATTCTTCGTTCCGTTGATTATTTCTCATATCGATGAGGAATGAAA  
GTGCATCTTGATAGATATGGACTTATTACGTTCTGAAGTAGGACTGCGTTCCGTTGGG CAAAAGATCCTT  
TAATCGAATTTAAGAATGAGTCCTTCTGCTGTTTGAAGGGCTGATTCGCGATATTCGCATTGCTATAGT  
GAAACACTTATTTCGCTTTAAGAATTATCATTAAACACGTAGCGATAGACCAGATAATGCTATCCAACAGTA  
GCCACGGC TTTTCATAATCATGACAAT TTTTCGCCCTATGGAGTTGACAATTGTCGGTGAGGAAGAAGAGT  
CGTAAGAGGCTTGT CAAACTAGGCAATCTCCTTAATTGGAGATTGCCT TTTCTATTTAGAGAGTTCGTTA  
GGATC GAAAAGAGCTAGGGTGTATTGTTATAT GAAAGTAGACCA TTTAGACCAGGATTCCCCGTCATG  
GTGACGAATCCA GAAAGAGCGATGATTATCACCTATTAAGAATTGTACACGATGTTCCCATTCATGCG  
GTCATG CAAATGATGATATTGTCTAAGTTGGCAT TTTGGGCTGGGAAGTCTTCAGGAGCATGAATCAGCT  
TTTTCACATTAGTGGTGAGTAG CAAA TCTGGCTGAAGAAGTTGATCGCAGTCATATTCGGCTGTAGTGAT  
CTTTTTAGGAGGAATAT TAAACCACCCTTCCAACAACCTTGGTAATAGCCGCGAGTATAGGCATAATTA  
TGATCACTAATATAGAATTGACGAATCGACCA TTTAATATGGACTTCCCTAATACAATCAGTAAGTCAC  
CAT TTTCTCGATCATCTTCTCTATATACACCCTGTATCATGGTAGGCATCTAGAGGT TTTGCTTATC  
AGACTCGCAGATAAGATGATCTAGTTCATTATCGGGCTCGAATTCATCATAGGGTTCGTAGTGCATAGGG  
AT TAAAATCTCCAA GAAATAACTAAT TTTAGT TTTATTATTTCTAA TAAAAGATT TTTATTTT TTTACA  
AATTAATTTGAT TTTCTTGCAGGT TTTGCTTTGTATTC TAAAT CAAATGGAACCTATATAAAAT TAAAAG  
CTGCT TTTTAAAGTGT TTTTAAAATACAACCTCGTAAGG TTTCTGTCAGCAGACTATTGGAATTGAT TAAACAG  
CAAGAAAG TAAATGGTGTGTCGTCCTTATGAATCGCATAGTAGATGCG TAAACG TTTGCCATTAATGACC  
TGCGGATGGTGTCT TTTGCATAGCAGAAGCTAATAACCTTGTAACTAAGGAAGTCGAGAGT TTTGTCGTTG  
CAATAGTATAGATATCATCAATAGCAGAAAAGA TTTGTAACAGATTGCGGCGTTGCTTGGCT GAAATACA  
AAGTATGTGCGCTTGACCTATATAGGGATCCATT TTTTCGCAAGTCTTGAACATAATGTTCCATGCGAACA  
C CAAA CATTAAGTCCCA TTTATTTA CAGAGAATCACATGAGGTTT TTTATATCTCGCAATCATAGATAGAA  
TCCGCTTATCTTGATAGGAGAGCTGCTGGGTCGCATCGATCACTAATAGG CAAA TGTCTGTTCTG GAAAT  
GGCTT TTTCTGTTTCGAGAAGAAGACATCCATTCCACAGAGTT TTTAATGCTCTTAGTT TTTCTTAATCCG  
GCAGTATCTA TAAA GACGTATTC TTTAATTGTTATGCGTATAGGCAACATCGATGTTGTCTCGTGTAGTCC  
CTGGAGAATTATCCGTTATACAGCGCTCCTCCTTAAAGAAGAGCATTGATAATGGAGGA TTTTCCTACATT  
GGGATGCCAATCAACGCTACC TTTAACGGGCGGTCTACAGGGGCTGGCGTCCGCTGCGCAACGAGC  
TCTTCCAG GAAA GAAGCTTCTTCTTGTGATAGGGATTTCAT TTTCAAAGAG TTTCATCAG CAAA GGCAT



GCAAAGATATAGCAGCCTCTTCAGAGGGGAGCTCGTCTTCTTGTACAACATCTTGTTCCTTCTACAGAAG  
TACAGGGATCTGCGGATCTGACGGATGCGTTCCAAGAGTAAATCAATATGCTTATCATGGCTAGCCGAT  
GTGGCAATCATATCAGAGATTCCCAATCCAATAATTCATGAATGCGCTGTAAATCCTGCTGGGAATCCG  
CTTTATTTCATAACAAGAATCAAAAGCCTTCTCAACGGCAGGAGACGCTTAGCCAGCTCTTCATCTTGTT  
GGTGATAACCACATCGGATATCTACTACAAGCAGCAGAACAGAGGCTTCCTCTGCTGCTGCATAAGCCTGT  
TGATGAAATTTGCTTTGGAATCGGTCGGTAGACTCTTGGTCTACGCCCCAGTATCGATAACATGGATAA  
TAGAATCCCAGGCTCGAATTTCTCCATACAAAAGATCTCGCGTAGTTCCTTCTTGAGAGTTCACAATCGC  
TAAAGAGCGTCTACATAAGCGGTTGAAGAGAGAAGACTTCCCTACATTGGGTCTTCCATAATAGCAATA  
CGCATAAACAGGCTCTATTAATCAAAAGTTGAATAATTAGGAAAGAAATGATAAAGAGTAAAAAATTAAT  
CTAAAGAACAAAAATAAACTATTTAGAAATGTTTATCGGAGAAGAGGAGTTATTTCCAAATCCCTTGC  
TCTTCAGTAGAGATAAAATTTTCTTTGTCCGAGCACTCGTGTCTATGGATAGCGCTTCAGCTTCTCT  
GAGTAGTTCCCCTAGTAACCGACCCGGAGTAATTCCTTTCGCGATGAGATCTTGCGCCAAAACAAGAGGA  
GCTCCTGACTGGATTCCTTCTATGAATGCTGCAAGACGTGTTTATAGGTCATGTATACGAGCAAATAA  
GTTCTTGCTCGTCTGGTGAGCGCTGCATCGACAGGAAGAGCGAAAGCAGCAAGAGGAGGTCTCTGAAGC  
AAAAAATGTGCCCAAAAAACTTGTTCATTTTGTGTAATAAATGAGGAAGAGCTGCGTACCAGTCT  
TCCAATAGTTTAAGCTCTTTGTTGGATACGCGTAAGCGAGAGAAGGCTTCTAGAGCTTTTCTCTGTCTA  
CTTCTCGGAATAAAGGTAGCAAAGCGATCTCTGGAATCTGAGAATCATGGATTTTGTGCAAAAGC  
AATTGCAGAGCGTAAATCCACTCGAGGATACTTTTAATTCAGGGAATAGGATAGGAAGCACTTTAAT  
TTGTAAGTAAGTCAAGACTCGTAAGGGGCTGTCCGGAGCATTTTGTGAGCTCTTGCATAATCTTT  
CAGGAGCGACAGAAATTTGGTAAGGAAGGCAGCTCCTAATGATGGCTTGTTCGGTTTGCAGATCTAAAGC  
AAAGCCTAATGTGCGCAGCAAAACGAATGGCTCTTAGGATACGGAGTTTATCCTCTAGGAATCTTTGTTTT  
GGATGGCCAATGGCCGAATGATTTTCTTTCTAAGTCGGCTCTACCTTCTACTAAGTCGAATAGTTCT  
CTTCAAGGGATCATAGTACATGCCATTGATGGTAAATCCCTACGAATAGCATCGTCTTTCATCGATGC  
AAAGACAACCTCGATTAGGATGTGACCGTCTTCATAATCTTCATCGCTACGGAAAAGTAGCGACTTCAAT  
AACTGCCATTCTCTTTACAGCGATAATGCCGAAAGCCGCGCCAATAGAAAGAGTATCCGGGAAGATTG  
TAGTGACAATAGTAGGAGAAGCATTAGTTGCTATGTCTACCTCTTCGATGGGGCGTCCTAAGAGCATGTC  
TCGAACGCTCCCACCAACGAAATACGCTTGATACCCAGCATTGCGTAATTTTGAACAATCTTTTGTGCA  
ACTTCCAATGTGGACTGGGTCTATGCAATTCCTAAAGTTAAGCAATCGCCTCTGGTGAATTTCTGAATAAT  
GACCGAGGTTTATTTGTGTGATAGTGTCTTCTCTATACGGATGGCTTCTACCCTAGGGTTCGGAAGGG  
ATCTCGAACATAAGATCTCTGAGAAGATTCTCTAAGATCATTCTAAGGCTCGGGCTCCGGTTTGTGCTT  
GTTAGCTTTTGGCTATAGCATAAAGAGCCTCTTTTGAAGATTAACCTGACGTTTCTTCTTCGAA  
TAACTCTGTGTATTGCTTAAACAATCGCGTTAGCTGGCTCCGTAAGAATCTCAACAAGCTCATCAAGAGTG  
AGTTCTTCACAGTTGACAATAACAATAAACCAGGCAATTTCTGGAATCATTCAAAGGTGATCAAGT  
CTTCTGTTTCTACTTTGCAAGTAGATGATCGCGATTCTGTTACAGCCAGATCGGTTTCTTCGGAGAAGCC  
TATCGTTGTTCTTCCGAGTCTTTAGCAATGATTTATCCAGGTAAAGCAAGCTCCCCCACAATGAAG  
AGAATATCTCCGTAATACACGAATATACTCTTGGTTAGGATGCTTCTTCTTCCCTTTAGGAGGGATAT  
TTGCAACAGTTCTTCGATGATTTTCAAAAGGGCTTGTGGACGCCTTCTCCAGAAACATCTCGAGTAAT  
GGAAACATTAGCAGTTGTGCGACCAATTTATCGATCTCATCAATGTAAATAATGCCTCGCTCTGCTCGC  
GCTACATCATAATCTGCTGCTTGCAAAAGCCGTAAACAATATTTCTACATCTTCTCCGACATAACCGG  
CTTCAGTTAAGGTAGTCGCGTCTGCAATGTAAATGGGACATCTAAATCTTAGCTAATGTTTAGCGGAT  
TAAAGTTTCCAGATCCTGTTGGCCCTAGTAATAATACGTTGGATTTCCATAACTCACTTGTATTC  
TGCATAAGAGCACGGATACGCTTATAGTGGTTATAGACGGCAACGAAATCGTTTTTCTCGCGCTCTT  
GTCCAATGACATAAGAGTCGATGTGGCGTTGATTTCTTTAGGGGTTAACACTCTCAGACTTGTGGAGA  
GCTTGTGGAAGATGTTGCGATCTCCTGTGTTGCGGGAGCTGGAGTTTATCCAGGATCCCAGAACACAGC  
TTAATAACAATAGTCGCAATGTACACGGATGGACCAGCGATTAGCTTCTCAACATCTTCTCAGATCGTC  
CACAAAAGAACAGACCCGAAGATTTTTTTTGTTCATAACAATCTCTAAGACGCAATACTCTTATCTTT  
TGCTCTTTAGCAGAAGAGATCACTTATCAATTAACCATAAGCAATGCTTCTTCTGCTCCCAATAAG  
AAGTCTCTCTGAGTCTCAATGATTTTCTTACTGATTGGCCAGTGCATTCTGCAAGAATATTTGGAGA  
GGTGTTTTCTCAATGTAAAAATTTAGCAGCTTGCAGTTGAATGTCTGCAGAGGTCCCAATGATCCCTCC  
TGAAGGCTGGTGAATCATCATGCGGCTATGGGGTAGGGCATAACGTTTCCCCTTGTCCCTGCAGATAAT  
AAAAGCGCTCCCATAGAAGCGGCTTGTCCAATGCAGTACGTAATTCATCACAGCCTAGGAAACGAATGG  
TGTCGTAAATCGCTAACCTGCTGTGATATATCCCCCTGGAGAGTTGATGAAAATTTGAATATCCTTAGT  
AGGATCTTCAGACATAAGAAATAGAAGCTGGGCTATGACCGTATTAGCAAGGCTCTGTAATTTCTTGC

CCAATCATGACTATGCGGTC**TTTC**AGTAGCCGAGAA**TAAA**TATCCATGGCTCGTTCGCCGCGACCCGTGT  
CTTCAACAACGTATGGTACCAACGTCATATGTGTGCTTCCCTCT**CAAA**TCAT**TTTG**GTTACAGGTGTGCTTA  
CGTTATGGCTACTCTTGACCCTA**GAAA****GAAA**GATCCTATCTAATT**CAAA**ATACACCTACGCAT**CAAA**AT  
GATGAATTCTATG**TTTA**AGTGTCTCTTGGGTCAAGCGT**TTTC**CTGCGAT**CAAA**ATTAAGAAGGAACAACC  
TC**TAAA**TCTTT**TTTC**TCGGAT**GAAA**TTGCTTCAATTGC**TTTA**CGATAAGTCAATCGATCACGAGCAACAA  
GAACTAACTCTTGGATCATCTCATT**GAA**ATATCT**TTTG**GAGGGTAGCCTC**CAAA**ACGTTCTCTGGAG**CA**  
**AA**CATCCATCATATATTGGAGTTCTTCTCTA**GAAA**TAGACAAGCCTT**TTTC**TGAGAATACTT**TTTG**AGTT  
AAGAACAGAAGCTTCACAGCCTTCCCTTGCATCTGC**TTTC**CGCTTCTCTAG**TAAA**GCTTG**TTTC**TGTTCCCT  
CTAGCTCGGAATCGGAGCAATA**TTTG**AC**TAAA**CGAGCG**TTTA**ACAGTT**TTTC**CTAGAGAGAAGTTCTTC  
TCGCTCTCGCAATAAGCTCTCTGG**TAAA****CAAA**ATCTATAAGCTGAGC**TAAA**GCATCCTCTGCATCAGAG  
**AAA**CGTT**TTTG**GTGCTGAGCTTC**TTTA**GCTTGAT**TTTC**TAATTGTATGCGAAGCTT**TTTC**TTCAGATCTT  
**C****CAAA**GATTCTGCCTGTAGTTCTCGAGCT**TTTC**ATCGTCCA**TTTC**CGGAGAT**GAA**AT**TTCA**ATCACAGC  
GTTGACAGTGAAGGTAAGAAGATCTCCG**TTTA**GGAAGGATTGAATATCTTCAGAACCA**TTTC**CTCCTCT  
ACACGATGCCCTGTAGACAGTTCAAGAATCTAGC**TTTAAA**AGAATCTGTATATCCTCTTCGCTAAT**TT**  
**TGAAA**TATTTAT**TTTC****CAAA**AATAGCTACTGGAGTCGAATTCTCATCACCCCT**TTTA**GAGACATATAGAGA  
TAAGGAGAT**TAAA**GTCTCCTTCTTGGGAAGGTCTCGTGACAGGTGT**TTTG**GT**TTTG****CAAA**AAAGTAAGCAACA  
TTTT**TTTA**ACCCATTCTC**TAAA**TCTTCTCAGAGATCTC**TTTG**ACAGGTT**CAGG**ATCAGGCAAGCTTAACT  
GCTCCCATGGTAGAGAAGGAATGACAGGGAATGCTTCGTACAG**GAAAGAAA**CAGAGCCTCCG**TTTA**CCGG  
GTTGCAAGTATCAATTGCCGAGGAGCGCACAGCT**TTTG**GAGAT**TAAA**GGT**TTTC**TATCACACAT**TTTG**T**GAA**  
**AG**AGCTT**CAAA**AGAGGCTCTAAGGAA**CAAA**CGTCGGAGTTCTGCTCCACTTGGGTTGAATAGCGAGACT  
CAACAATATTATCAGGTGCT**TTTC**C**TTTG**C**GAAA**TCCTGG**TAAA**ACAACATTTTT**TTTG**ACGGTCTTCAG  
AGCTTC**TTTA**TGACACT**TTTG**TGTGACCAAGGGATTAGCTTGGACT**TTTG**CAGACACAACACAACCAGCA  
**TTTC**TTCTATATTTATAGAAA**CAAA**TCATT**GAAA**AATCTCGTGAAGACACAGAATACCCA**TTTG**GTA  
AGTTATCCGG**GAAA**AGAGAAGCGGGTGATGAGGCTTGAATCAGACCTTACGTTGGCAACGTGCGCT  
CTACCACTGAGCTACCCCGGAGAAGAGGAGCATTCTAGATAATCTGGGGAGTT**TTTC**GCAATCC**TTTG**  
CTTGTAGGT**TTTACAAA**AAAACGTTG**GAAA**AAGGTTT**TTTG**AGAAGGTGAAGAGTGG**TAAAAAA****GAAA**  
AATTGACTGC**CAAA**CAGC**TTTAAA**AAGGG**GAAA**AATAGAGGAAGAAGAGAGCGT**CAAA**AT**TTTC**ATTGAT  
**TTAG**CGGAAG**TAAA**AAGGTACAAGTAACAGGTCTGTCAACCCCTATGT**TTTA**GAGGAG**GAAA**TGCTTAAT  
**TTTC**G**TAAA**ATTAAGAAGAGAT**TTTA**CAGCTAACATACTGCAAGATG**GAAA**AGAGTTAT**TTTG**CTCAAGGAG  
CTGTGGTTAGTGCC**CAAA**ATCTTATCTATGAATGGCGAGACGGTGTGTATTAGCGCA**CAAA**ATTCGTGGTTC  
GTACGATAACG**TTTA**CGAGTGC**GAAA**TTGAAGTAGATCGAGCGGAATCTGACACCGTGGATTCCAAC**TGC**  
GATTGTTCTTACAATTACGACTGTCAGCATGTCGTTGCCTTGTAT**TTTA**CTTAGAGCAGTACTTCAAT**G**  
**AAA**TGGTAGTTACCTACTCTAAGGAAGCAGATC**TTTC**TTCTAATGAGGAGTGAGTAAGGAATTACAAGA  
GACT**TTTG**TCGTTGCAGCGATT**CGAG**AGGAGGAACGAAGAGATCGGGAACAC**CAAA**AG**GAAA**TCCTTCGG  
GAATACAATCATGCTGCTAATGT**TTTA**AGT**GAAA**ATCCCTTCTCTTGGC**TTTA**GAGTATTCTG**GAAA**G  
ATAGTGCAAGACTAGCTGT**TTTG**TTGTTCCCT**CAAA**AAAATGAAGGGGAAGTCTTCTCTCCTAACAGCC  
TATAGAA**TTTC**AGCTTGTCTGCGTCTTCC**TGGG**CGTTC**TAAA**CCAT**TTTACA****TTTC**CAATAT**CAAA**ACA  
TT**TTTA**GAGGGGT**TTTG**TATCAAGAGCCTATTGTC**TTTA**AGTGAAGAAGATT**TTTC**TTA**CGTCC**AGT  
CT**TTTA**AGTGCTTCGGACAG**GAAA**ACTCATCGAT**TTTG**CTGATTTCGTTATGCGCGTTATGCTACAGGAAGTTC  
TGAAGAGAAATTAT**TAA**AGTCTGCT**TTTC**TGACTCCAGCATC**TTTG**GGGATGAT**TTTATC****CAAA**ATGTTC  
GAACAT**CAAA**TGGCAGAAAGCGGAGGCTCTCAATTAGGAGAGAGAGAATGT**TTTC**AGGGGATCT**TTTG**TG  
GGAA**TTT**AGAAGAACC**TTTG**C**TTTG**GT**TTTC**TCCCGCTAAGATGAAGTTCCACTTAGATTAC**TTTGA**  
TACGCCATAC**CAAA**GCGTTATTAAT**GAA**ACC**TTTG**ATTGTTGTGGATGAAGAGGAATTACAGCCTGAGCAA  
GCAGTTCTTCTGGAATCCAATTATCC**TGGG**ATTATTCATAAGAATG**TTTAT**CACCA**TTTC**TTGCCGAGAA  
TTAAGCGTGCTCA**TTTA**AGAAGT**TTTG**CAGGGTTGCGTGATATAGCTATCCCGGAAGCTCTG**TTTG**GTTC  
CT**TTTG**CGAGAACGC**TTTG**CCAGTAT**TCC****GAAA**TTATGCGGAATGTCCAATGTCGAGGC**TTTAAA**CGT**T**  
**TTCA**GTACATTGCCATATACAGAGGAATTACAAGGCG**TTTG**TGATATTAGCTA**TTTG**GATGGAGA**ACTCG**  
AGGCGAGACTCTT**TTTC****TTTA**CGACGGGC**GAAA**GTTCCTGCAACTTC**TTTC**TC**TTTG**CAGTATCAAGA  
AGTTCGCACT**TTTG**TTCGTCTGATGGGAT**TTTA**AGCTCGGA**ACT**AGTTGAAGAG**GAAAA**ATCTAGAA  
GAGGTAT**TTTC**TGGG**TTTG**TCTATGACGAGCGCGATGGAGCT**TTTC**ATG**TAAA**AGTGAGAAGAAGATTG  
TCGAA**TTT**ATGACAGAGACGATCCCTAATAACCAGCATCGCATCACA**TTTA**ATTGTCCA**GAAA**CTCTGTC  
TGATCAG**TTT**ATTTATGAT**GAAA**CTGTC**TTTG**ATCTCAT**TTTC**CGAGCAGGAGAGGATATCAACTACTAC  
GAAGCGGAGT**TAAA**AGTTCATGGCTTGCT**GAAA**GGCATCAG**TTTA**GACTTAC**TTTG**GGATTGTGTCAGTG

CGAAGAAGCGCTTCTTAGAGTTGCC TAAAAAGGGCGGTCAATT GAAA AAAGCGGGCGAG GAAA GGCTTC  
TGCTTC GAAACTTCCATGCATCCTTGTCTCGA TTTAGAAAAAATCGCACCTGTTATT CAAATTTTCAAT  
GAAA TTGGGTTCCAAGTTCTAGATGAT TTTGTTGAGAAATGTCC TTTATGGAGTCTATCTGGAA TTTGCG  
CGGAATC TTTCAAAGATCTTCTGTGA ACTTTTC TATGACAGAAGATCTCGCT GAAA TACAGAAA CAGAT  
TCGTGGAGAAGTAGAC TTTGAGTTCCAAGAGGTTCTTCT CAAA TTCAGGCAACGTTAAGAGGCTATCAG  
AAA GAAGGGGTGCATTTGGTTAGAGCGTCTGCGTAAGATGCATCTTAATGGAATTC TTGCAGATGACATGG  
GATTAGGGAAGACGTTGCAGACCATTATTGCTGTGACACAGAGTCGCTTG GAAAAAGGCGGGGATGTTT  
TCTAATCA TTTG CCCCCTTCTCTTGTGTACA ACTG GAAA GAAGAATTCC GAAAA TTTAACCCAGAG TTT  
AAGACTCTCGTAGTTGACGGTATTCCGTCTCAGCGACGTAAGCAGTTAGCTTCATTAGAAGAGTATGATG  
TAGCGATTACTTCTTACAA TTTA TTGCA GAAA GACATCGATATCTA CAAAGAT TTTCTTTTACTACGT  
TGT TTTA GACGAGGCGCATCACATTAAGAATCGAACTACCCGCAACGC CAAATCGG TAAAAATGATTCGC  
GCTTGTATCG TTTG ATTCTTACAGGA ACTCCGATTGAGAATTCATTGGAAGAGTTGTGGAG TTTA TTTG  
A TTTCTCATGCCAGGTCTCCTTAGCAGCTATGATCGC TTTGTGGG TAAATACATTCGTATCGGTA ACTA  
TATGGGGAAT TAAA GCGGACAATGTGGAAGCTTTA AGAAGAAA GGTGCGCCT TTTA TTTTTCGAGAATG  
AAA GAGGATGTTCTAGAAGATCTACCTCCTGTGTCT GAAATTC TTTA TCATTGTCATCTCACAGAATCAC  
AGCGAGA ACTCTATCAGTCTATGCGGCTTCGGCGAGACAAGAATTATCTCGCTTAGT GAAA CAAGAAGG  
TTTC GAGAGAATTCACATTCATGTGTTGGCTACGCTTACCCGAT TAAA ACAGAT TTTG TTTGTCATCCTGCA  
ATT TTTG CGAAGGATACTCCAGAGCCAGGAGATTCAG CAAA ATATGACATGTTGATGGATCTGTTGAGCT  
CATTAGTGGATTCTGGCCATAAGACAGTTGTC TTTA GTGAGTACACCAAGATGTTAGGTATTATTAGACA  
AGAT TTTG GAAGCTAAGGGTATTCC TTTCTGATATCTGGATGGTTCCACCAAGAACAGATTAGAGATTGTT  
CAACAGTTCAATGAAGATCCAGGTCTTCTTGT TTTCTTGG TTTCTTTAAAAGCTGGAGGAACAGGAT TAA  
ACTTGGTTGGAGCTGATACTGTGATT CATTACGATATGTGGTGAATCCTGCTGTGGAGAATCAAGCTAC  
CGATCGGGTGCATCGTATTGGCCAGAGTCGTTCCGCTCTTCTTA TAAA CTAGTTACATTGAATACAATC  
GAAGAAA AAATCCTGAG TTTG CAGAACCG GAAA AAGGGTCTTG TAAAGAAA GTGATCAATTCTGATGATG  
AAGTCG TTTCTAAGTTA ACTTGGGAAGAAGTGCTCGA ACTTCTACAGATATAAT TTTATGAGCCATAACC  
GCAGCTTATATAAGAT TAAACAT TTTG TCTAACCGTCTGTATAACAAGGCGTTGGGTCG TTTGATCGTGT  
ATTTA ATTTTT TTTCTCGGGAATGTTGGTATCGACCTAGGGACGG CAAA CACCTTAG TTTATGTCGAGGT  
CGAGGGATTGTTCTTAGTGAACCTTCCGTTGTGGCTGTAGATGCACAGACTCATGCGGTCTTAGCCGTAG  
GTCA TAAAGCGAAGGCGATGTTAGGGAAGACCCCGCG GAAA ATGTAGCTGTTCTCCATGAAGGACGG  
TGTCATTTGCGGAT TTTGAAA TAGCAGAAGGGATGC TAAAAGCCCTCAT TAAA CGAGTGACTCCTGCTCGT  
AGTATG TTTCTGCC GAAA ATTCTTATTGCTGTTCCCTCAGGAATTACCGGTGTT GAAA AACCGCTGTTG  
AAGATCTGCT TTTG CATGCGGGAGCACAGGAAGTAATCTGATTGAAGAGCCTATGGCAGCAGCCATTGG  
CGTCGATCTCCCTGTACATGAACCTGCAGCAAGTATGATTATTGACATTGGGGGAGGACAACA GAAA TA  
GCTATTA TTTCTCTTGGAGGAATTGTAGAGTCGCGTT TTTG CGTATAGCAGGGGATGAGTTGATGAGT  
GTATTATTAATTATATGCGCCGCACATACAA TTTA ATGATCGGTCCGCGGACAGCAGAGGAGATCAAGAT  
TACTATAGTTCTGCTTATCCGTTAGGTGATCAGGAATTGGAGATGGAAGTACGCGGACGCGATCAGGTA  
GCTGGGCTGCCTATCAC GAAAAGAATCAATTCGTA GAAATCCGGGAGTGCTTAGCAGAACCTATT CAGC  
AAA TTATAGAATGTGTACGGTTGACTCTAGAGAAGTGCTCCTCCAGA ACTCTCTGCAGAT TTTAGTAGAGCG  
TGGGATGGTGTAGCCGGAGGAGGAGCTCTGAT TAAA GGGTTAGA TAAAGCATTAAG TAAAAACACCGGG  
CTCTCTGTTATTACAGCGCCGCATCCACT TTTAGCGGTCTG TTTAGGTACAGG GAAA GC TTTG GAACATC  
TGGATCAATTGAA GAAA CAAA AGAGAG TTTA GTATGACCGGCGATTGGATATCTAAGATAACCCATTCA  
GGAT TAAA ATCTTGGATAGAAGAAGTAATTGC TTTG GTGTACCTGACGACGTAAGGTTATGCGATGGTT  
CAGAAGCCGAATACCAACAGC TTTGCCAGCAGATGCAGGATGCTGGGGTGTGACCCCTC TAAA TCCTGA  
GCTGCATCCTAACTGCTTCTCGTTCGTTCTTCTCCTAGTGATGTCGCTCGTGTGAACAA TTTACT TTT  
ATTTGTACCAAGACTCAAGAAGAAGCTGGTCCAA CAAA TAACTGGAGAGATCCTCAAGAGATGCGTGCAG  
AGCTGCACGATTATTCGAGGGTGTATGCGAGGTCGCACACTCTACATTGTGCC TTTGTATGGGGCC  
TTTGA ACTCTCCAT TTTCTTTG ATTTGGTGTGAGATTACAGACTCTCCTTATGTTGTATGTTCTATGAAG  
ATCATGACGCGTATGGGAGCTTCTGT TTTAGCGATGTTGGGTTCTAATGGGAC TTTCTATAAGTG TTTAC  
ATAGTGTAGGGAAGCCCTTAGCTCCTGGAGA GAAA GATGTAGCATGGCCTTGTGATCCTGAGCATATGCG  
TATTGTCCA TTTCCAAGATGACAGTAGTGTGATGCT TTTGGTAGCGGATACGGAGGCAACGCATTGCTA  
GGTAAGAAGTGCGTAGC TTTGCG TTTAGCTTCTTA TTTAGGACATCAACAAGGTTGGTTAGCGGAGCATA  
TGTTGATTATTGGGGTGACTAACCTGAAGGAAGGAAGAAGTAT TTTGCTGCGGCGTTCCCTAGCGCTTG  
TG GAAA AACGAATCTTGCTATGTTGATGCCTAAGCTGCCAGGGTGAAGGTGGAGTGTATTGGGGATGAC

ATTGCTTGGATTTCGTCCTGGTAATGATGGGAGATTATACGCAGTGAATCCAGAA TTTG GATTT TTTG GAG  
TGGCATTAGGAACCTCAGAGACTA CAAA TCCTCACGCACCTGCCACTTGTTCATGCGGACTCACTATTCAC  
GAACGTAGC TTTG ACTGCTGATGGAGATGTATGGTGGGAAGG TAAA ACTACCACGCCTCCGCAAGGTATG  
ATTGATTGGAAGGGTCGAGCTTGGGTCTCTGGAGGGGAGCCTGCAGCACATCCTAATGCGCGT TTTA CAG  
CTCCGTTGGATCATTTGTCCTTC TTTA GATCCGCAATGGAATAATCCTCAAGGGGTTC TTTA GAGGCGGT  
CATT TTTG GTGGAAGACGTACAGAGACCATTCC TTTA GTATATGAGGCGTTAAGCTGGGAGCATGGGGTG  
ATGATGGGGGCAGGGATGTCCTCAACGACAACCTGCCGCGATTGTAGGGGAGTTGGG TAAA ACTGCGACATG  
ATCCT TTTG CTATGCTTCCAT TTTG TGGCTATAACATGGCAGCTTA TTT C GAGCATTGGTTGTCG TTTGC  
TAC TAAA GG TTTG CAGTTGCCTAGAATT TTTG GTGTCAACTGGTTCGGTAAGGATGAGCACGGGCAGTTC  
A TTTG GCCTGGGTTCCTCA GAAA ATCTTCGTGTATTAGAATGGATCTTCCGTCGTACGGATGGAGAGGATG  
CCATTGCGCACCGTACTCCGGTAGGATA TTTA CCTACAGCAGAAGGGCTTAATACATCGGGGCTTGATCT  
ATCCGAGGATGC TTTG CGAGC TTTG TTGACTGTAGATGCGCAGGGTTG GAAA GCTGAGGTCAGTAATATT  
CGGAAGTATTGTTTCGAT TTT C GGAGCTGATATGCCACAGCGCATTCTTGAAGAATTATCCAGAATA GAAA  
GCGAATT GAAA TAAT TAAAAA GAAA CGAGTT TTTG ATTATTCTAG TTTA GATACTATTGTTTTCTGT TTT  
AAAA AACATTT TTTA TTT TTTAAA ATTA GAAAAACA ATAGTT TTT C TGGATGATCTCGTGTCAATACAACCT  
ACATCCA TTTCT TTTA ACTAAGAATATAACGGCAGC TTTAGCCGGAGAGCAGGTCGATGCTGCTGCAGTGT  
ATATGCCGCAGGCTGTTTT TTTCTTT CAGCAACTGGAT GAAAAAAGCAAGGGGCT GAAA CGGGC TTTAGG  
ATTGCTCGAAGAGGTTGATCTAGAAAA TTTA TACCGTCT TTTAGAAA AATCACCTACACCTATCACTACG  
GGAACAACGAG TAAAA TTTCCGCTGATGGGATTGAGATTGTTGGAGAGC TTT C TTCAGAAA CAAT TTTGG  
CAGATCCTAATAAAGCTGCAGCTCAGGTT TTTG GAGAGGGGCTTGCAGATAGT TTTG ATGATTGGCTCAG  
ATTATCT GAAA ATGGGGGATTCAAGATCCTACAGCAATAGAAGAAGAGATTGTTACTAAGTATCAAACA  
GAACTCAATACTCTGCGCAATAAAA CTCAAGCAACAATC TTTA ACAGACGATGAGTATACGAAGC TTTATG  
CTATTCCT CAAA AC TTTGTTAAA GAGATA GAAA GCT TAAA GAAT GAAA ATAATGTGAGGTTAATTC CCAA  
AAG TAAA GTCACTAACT TTTG GCAGAATATCATGCTCACTTACAACCTCGGTAACCTCGTTATCAGAACCT  
GTTGCCGATGCGATGAATACGACTATGACGGAGTACTCTCT TTTA TATTGAGAGAGCTACAGAGGCTGCCA  
AGTTGATACGGGAGATAACCAACACGAT CAAA GACAT TTTCAATCCAG TTTGGGATGTGCGTGAA CAAAC  
AGGAATT TTTAGGT TAAA AGGAGCTGAGTATAACGC TTTAGAAGGCAATATGATT CAAAGCTTGCTTAGC  
TTTG CGGGTCTATTCCGGCAGTTAATGAGTCGTACTGCAACAGTTGATGAGATAGGCGCAC TTTA TCCTA  
AAA ATGA TAAA AACGAAGACGTCACTCATACTGCTATTGATGATTATGTGAATTC TTTAGCTGATTTGAA  
AGCCAATGAACAGGT CAAACTCAACGGTCTGTTGAG TTTAGTATATGCTTATTATGCTAGTACT TTTAGGT  
TTTG CTAAGAAGGATGTATTCAATAATGCACAAGCTTCT TTTA CAGATTATACTAAT TTTCTAAA CCAAG  
AGATCCAATATTGGAGGCTAGAGAGACTTCAAGT TTTA ATATCTCCAATCAAGCATTGCGAACC TTTAA  
AATAAGCCTTCGGCTGATTATAACGGCGTATATCTT TTTGATAA TAAAGGATTAGCGACTAATCTCT TTT  
AATCCTACATTCCTC TTTG ATGTTGTGAGTCTCATGACAGCTGATCCTACGAAGACTATTGTCTCGACAGG  
ATTACAATAAGGTGATTACAGCCTCGGAATCCAGTATTCAGAAGATTAATCAGGCTATTACCCTGTTGGGA  
ACTAGCTATTGCAGAATGTGGGAC TAAAAAAGCGAAGCTCGAACCATCCAG TTTAAA TTAT TTTA ATGCT  
ATGGTCGAAGCGAAGAAGACCTTCGTAGAGACCTCTCCAATACAGATGGTCTATTATCCT TTTG ATGTTGG  
ATAAGTATCTTCCGAATCAGCAGTACATATTAGAGACATTAGGAAGTCAGATGAC TTTCTCTAACAAGGC  
TGCTCGGTAT TTTAAA TGATATCATTTGCGCATGCAGTTAGCTTC CAAA CAGCTAACGCTATTATTCT TTTA  
GGGATGTATCTTCGA CAAATGAACCAGCAGGAA TTT C CTGAGGTGAT TTTCTCGTGCTAACGATACTGTGA  
AAAAAGAGATAGATCGGAGTCGTGCGGATCTC TTT C ACTGTAAA AAAGCTATC GAAA AGAT TAAA GAATT  
AGTGACTTCTATAAA TGCGGATACTGAATTGACCTCATCTCAGCGTGCAGAGTTATTAGAGACGTTAGCT  
AGTTATGCT TTTG AA TTTGAGAATCTCTATCACAACTCTCTAATG TTTACGTCATGG TTTCTAAGGTAC  
AGA TTTCTGGCGTAAGCATGCCTGATGAAGTGGATGAGGCT TTTA CTGCTAAGATTGGATCGAAGGAATT  
CGATACTTGGATTCAGCAGCTTACAACA TTTGAAA GTGCTGTGATTGAAGGTGGGCGTAATGGTGTGATG  
CCTGGGGGAGAGCAGCAGGT TTTA CAGAG TTTA GAGAGCAAGCAGCAAGATTACACGTCGTTCAACCAGA  
ATCAGCAATTAGCTCTA CAAATGGAGTCTGCAGCGATTCAACAAGAGTGGACTATGGTAGCAGCAGCCTT  
AGCATTAATGAATCAGATT TTTG CTAAGTTGATCCGTAGAT TTTAAA TAAAATCGT TTTAGAGGG CAAAA  
CGATTATGA GAAA CCATCCGATTCCAGAAGGA CAAA AGTAT TTTG TTCCAACAATAGAGACTGCGGCTCC  
TCGAGAACGCAGAGTCTCCCCTGCAGAAGTAGCAGCCGACTACACGCAGTTGCATGAGGCGGCAACGTAT  
CTTCAAGTAT TTT C AAGAT TTTA TTGAACGATGCGCATCAGTTAGGAC TAAATAAA GAGTTCGTAGAGAGTT  
TGCGTCAAGAT TTT C TAAAAACAGGCTCCGAGATGTC TTTG ATGCAAGCTCTATGGACTGAAGAGAGT CA  
AAGAGAAGCGCG TAAA AGAGAGA GAAA AGAGCTCCAGCAACAAC TAGAGTCCAAGGTACTAGGTCCTCAG

GCATTGACGACTGCTAAGGAGTTGCATCCTGTGGATGATAGTATTGTGAATAAGATGCCTTTTCAATCGG  
CTTTTCGCGTATATCCTTCTTGATAAGTATATTCCTGCACAGGAAGAGGCTCTGTATGCATTAGCAAGAGA  
GCTCAATTTTTCAGGGTATGCACAGACATTA TTTAGCCAGT TTTAGAGTTAGT GAAAAGT TTTAATAAC  
GCGCCTATCGTTTACAACCTTAGGCTCTTACATTGGGCAGACAGCAGGAAC TTTAAAATATGGCT  
ATCAGATGGTCTTGATCGTTAT GAAA CAGAGACTGGCCAGTTGA GAAA GGATAT TAAAAATGCTGAGAA  
TGCCAAGCAGCAGCTGGCACAGATTATTAAGAACGTAGAGG CAAA TAATTC TTTAACGACAGAGCACAAG  
ACTCAGCTCAAGGATATGG CAAA TGGGTATATTCAGAC TTTAGATGTCTGTATCTCC CAAA TGCAAGAGC  
TGCTACTGGATTGCGAGGATTATCA TTTATCCCTGGTAGAGATGAATACAACCC TGT TATGAGATTAT  
GGGATCTTCTTTTC CGTAGTTAC TTTACAAA ACTTGAAGGGGAAGGTTGTCTGATGGGGAGATCAATATT  
TCCTCTGGAGAAA CAAA GGTGGGCT TTTAAA CTTTC TTTACCTAT TTTCTTGCAGACGTACAGAAT TTTG  
GAGAT TTTAGCACAAA CGAATCAGTTGATGTTAGAACTA CAAA TGCGAGCTATGCATCAGCAATGGAGTTT  
AGTTACAGCCTCTCT GAAA CTCTTACATAATGTATATAGAACATTGGCTTCTAGCTAGACATGAGAGGAA  
ATCTTCTCTTAATCTCCCTTGAGGGGGAGGTTAAGAGAAGAGGGTTCGGGGGGTTAGAATTGGAATCCTC  
CGGAGACGTTACAGCGCGCTGGCTTCCCCTCTTCTTCTACGTTGTAGAAGAAGTTATCGGGGATATA  
G TTTGTCGCTCCGATGCAGATG TTTTC CACGATGAGAGCTGGTAAT TTTACGAACT TTTAAATTTGAGGTTA  
GTGAAGCGATCTTCTAATTT TTTG AAGCTGTCTCGTCCGGAGCTTGGCGA GAAA CACTCCCTATA GAAAACG  
CTAAGTAAGGAAGAACGTAGTCATTCACATAGGTAGTAAGACCTACGCAGACACTCCACTCCTTGAAGTT  
CAG TTTCCATCCGAGTCAGCGATGAATACTTCTGGATTAGCTTGACTG TTTG CAATGATGTAGTCAATA  
GGCAAGAAGCATGGCGATAGTCTGCACCGACGCTA CAAAG GAAA CGCCATC TTTTC CATATGACTTTTT  
TC AAGCTAACATCC CAAACAAA TCCGTAATTGGACTGTACTTCAATCATCCCGTCCGTAACCTCTGATTC  
AGAATTGAGAGGTTCCGAGGTGAAGTCTCGATAGGCATT CATGGGAAGGCGGTAGTATTG TTTTCAGTCCCT  
CCTAC TTTCACTTC GAAA CTACAT CAAA CAGAGGAATCGCGCTCAGCGAACGATCAGGAAGG GAAAAG  
CTGCAGCTACACAG TTTGCATTGAGATTACAGTTTACGAGATC GAAATTTTC GCGT TTTGGTTGTGCAAGT  
AATATTAGGAGAAGGACCAATCCCAGCTGTTGTACAGAGGTAACGACAGGGACATCT TTTA CCTGAGCT  
TCTTCT GAAAAGATATAATCTCCGAAGAAGCAGAGCTT CAGGTTACCGACAGTGGGATAGTACATCAT  
AAGAATTACATAAAA TC GAAA GAACAGGCATT TTTTC TGTTCATATTAATCCCCGGGATGACTG GAAACGC  
CGGATTCCCCCGCAGGCATAGCGTCTAATGAAGTAGATGCGATCCC TAAAAAAGATAG GAAAAGT CAAACGG  
AGATAGTTCACTAGCTTGCTACTCA TTTAGTCAAGGGCC TTTCTTTG TGGTCTGGGACTGAATCCGTATC  
TTTAGCAAATGC CAAA AAATTGTACAAAG GAAA AACATCGTCTCTCTAGCAGGGAAGGCGT TTTAGTCTT  
TTCTCATTGAAGAAGAACCTTATAAAA TATTCTTCT TTTGTATCACGTTGGAGAAGCTGAGCGATCCCTTC  
CTGAATATCGAGAT TTTTC GTAGAGAACCGCATAGACGCTGGTGGTAATCGGCATGCTTATTCTGTGGTGT  
GTAGCAA TTTGATGAGCAGAGAGCCGTGTACACCCCTTCGACCACCATAACCAAT TTTGT TTTAGCCT  
GTTCAGGAGTCAGGCCTTCGGCTAGCAA TTTTC CAAA GAGGGTA TTTCTACT GAAA GCAGAAAAGCAGGT  
GGTACAGAGGTTCTCTAGACCTGCGAGCCATTCAAGGTATCTGGACGGCATCCCATGATGGTGG CAAAT  
TTACGAA TTTTCATGCAGACCTCGGGTAACAAGTCCAGA TTTAGCATTATCCCCGAAGCGGAATCCGTGAG  
AGATTCCACAGGCTATGGCGATTACATT TTTTCAGTGTCTCTCCTAACGCAACTCCT TTTAGGTCGTATT  
AGGATAGACAC GAAA TGTAGGGGTGA GAAAAGCTCGATGAAT TTTGT TTTAGAGTATCAGGGTTATACGCA  
CTGATAACAACCGAGCAAGGGCATCCACGAAGGACTTCACTGGCAATAGAGGGCCACTGAGATAGCCTA  
GATGTTGCGCGGGGACGGC CAAA TA TTTCTAAA GCGAT TTTTC GCTTAGGAGTAAGCCTGTAT TTTG TTC  
GATACCT TTTGATGTGATTACTAGAGGAACGCGAAGCTCTGT CAAA GC TTTGAGTTGTGTTAGAACAGGT  
CTCATTCCTGCTGAGGTCCTTCTACAATCATCGTCTGCTCCATCTAGAGCTTCTTCCATGTGGTATG  
T GAAAAGAAA GATTCTGAGGAATGGAGATATGAGGAGCTGCTGGGTGTCGACGTTGCACAGACAAC TGTTC  
GATCAGTGCAGGG TTTCTTGCCCATCCCCTACACGATGACCATTATTAGCAAGAAGATTGGCGAGG GAA  
AATCCCACATGCCATTCCCTAGGTAGGCTATAGTCTC TTTTCATGAGGCCTCAATAATTG TTTTCCTGAA  
AAATATCTTAG TTTCCACTCTAAGGAAGTATGGGAGGAAGGGTAA TAAAAATCCGCTTCTAAT TCAAT  
ATTGTA TTTGGAGAAA GT TTTCTTTTC CGTAACAGCAG TAAATAGAGCATGTTCTCT TTTGCGCATAGCTT  
CTCGAACC GTTGCAGGGCTATGGTTCCTTATAGTT TTTGAGAGGAG CAAA GCATTCGTGGCGAGGATA  
TACAATGGCTTACTGTGTTGCTATATTGGAA CAAAT CAAAAA TAAA TTCTTTCGAACTTCCAAGCATTT  
T TTTTCAGTGGTAGAGGGATGTAATGCTTAGCGTG TTTATTCCGT TTTGTAAA GAGGAAGAGGTTGGTATG  
CTGT TTTGTGCTAGAAA GTCCATAGATAGACAGTACAAGCCGATA TTTGCGAG TTTATAGGTGAGATCTCC  
CTCTGTAGT TTTTCGCGCAACGTTTC TTTAGTAGTGAGTGTGGAGTATTCACAACCTGCAATTT TTTGT TTT  
GCTAATTCGATTAAGACTCCAACATCTTCTTGTGCAC TTTGTCG TAAA GTAGT TTTGATAGTGACATCAT  
TGTGTTCCGCTGCAT GAAA GCCAACGAGTTCTCTAT CAAAAGGCAATGCTAAGGGATTATCTATAGGGAT

TACACTAACCA**TTTC**TATCCCTGCTTGATGCCA**TTTA**TCCCAGATTCCCTGAAGATTGTAATAATGTGGAT  
AGACAGCCATTCCCTGTAGGTCCGAGAGATAGACGATCTTCAGATTCTAGGAACAGATCTCCGGAT**TAAAG**  
**AAA**GGAGAGGCCAGAGCGGCTGG**CAAA**AAAAATCTACTTGGGAGGGAGA**CAAA**T**TAAA**ATAGTCGTTAGT  
AG**CAAA**GTAAGAGAGGGTCTG**TTTA**TGATTAAGAGGGGAGGTCATAATCGCTAATGGCAATGGTCTCCCT  
ACCCA**TTTG**CTAGCCGCGGTACCTTCTCTGCAACTAGTTGA**TAAA**GAGGTTT**TTCTTTA**CAGAG**GAAA**  
CAGGATAGAGCCC**TTTG**GGCCCAT**CAAA****TTTA**ATCGCGATCCTTGGCCACCAGCTAATACGACGCAACC  
AACCTTACCTC**TTTG**CAATAGCTGGAAGCCCAGCTGGGCATAAGCAGGGTTGTGCGCCAGCATAGTGTACA  
GGGGATAAGGGAGTATATTCTTGATGAGAGGCTTGGAGAT**TTTG**TAGTAACGCTTGCTGACGAA**GAAAA**  
AAGGAATATCGA**TTTG**AGCGA**TTTG**AGTGCCTAACCGTAGCC**TTTG**TTGAGGGGATAACGAAGGCCAATA  
CTCTAA**TAAA**TGCTCCTGTTGAATAGGAAGCAGCTGATCCAATA**GAAA**TGA**TAAA**TCTACATACGAGGAG  
TCGGTCATTGTAGGTGGCCTTAGTTATTTCGCGCTC**TTTA**TAGGATA**TTTACT**GTGCATGGATCT**TTTC**GAT  
AATT**TTCTTTG**GTCTAGTTGTT**TTTG**TATGTGCGCATAAGCATC**TTTCAAA**GACGT**TTTC**AGGGCCTGA  
TGCTG**TTTA**TATAGAGAAG**TTTG**CTCTC**TTTG**T**TAAA**TGTTGGTCATATTCATGGGTATATG  
ACCGACATAGGAATTG**TTTG**TGCTTGTAAAG**GAAA****TTTC**CGCATGTGCTCCTGTAT**TTTG**TTGTAAGCG  
ATGTTCTATTGTGGAGAGCGCTTTT**TTTACTG****TTTC**CAACCGTGTACG**TTTC**TT**GAAA**AGCTCAATAGTG  
AGCAG**TTTAG**ACAGATCTTGGAGTTT**TTTATT**CATG**TTTC**CAACAGTTGGCACAGTTGTTCAATAG**TTTCA**  
TGAATAGCTGAGTAATGAGAATAAGGTTGAGA**TAAA**AATTGT**TTTA**CGGAGGGGAG**CAAAC**GAATGGCTC  
TATCGAGGTGAGCATCTTGTCTGAGACATAAGCTCCTAGTTGGATGATATCAATAGCTTCATGATAGGC  
**TTTG**AGTAAGGAGAGAAGCTCTTGAGCTGCAGCATAATGATGAGGGAGAGCTAACTGACGAGAAGACCGC  
**GAAA**GGCTCGTTAATACATTGATAGGAGGAGAA**GAAA**AGCTTT**TTTC**TTGAGGGGAGAG**GAAA****GAAA**TGCC  
CATCCAGAAGAGAT**TTTAC**ATAATCAG**TAAAA**AATATCTGGATGG**TTTG**CGTAATG**CAAA**ATGGCA**TAAAA**  
AGATGTGATAGATCC**TTTA**TCATTATCCAGCACGTTCTAGGAACCTGCAACATGATG**GAAA**ACGGAT  
GCAGCATAGTGGTGTGTAGATAGTGTCTCTCCTCTCGCGATCGCTACTTCTTGAAGGGATTCTATCCATC  
TAGATAAGGAATCCATAG**TAAA**TAATACGCGAGCTCCTTGATCTC**GAAA**ATATTCTGCGATTGTGATTGC  
TGCGCGCCTGCAATGAC**TTTG**CTAGCTGCAG**TTTC**ATAAGCGGTAGAGGCGATGATAACGGTACGTTGA  
GCGGCTAGGCCTTC**TTTG**TGTTGGTTGACATAGTCGCGCACCTCACGACCACGTTCTCCTATTAGGGCAA  
TGACATTGATTGTCTGTTGGGAACCC**TTTG**CTATCGTAGACAGAAGAGAAGAT**TTTC**CCTCCTCCAGGCTC  
**TGAAA**AGATGCCTACGCGTTGTCTTCTCCTATGTAAGGAGGGCGTCGATTGCGCGGATACCTGTAGGG  
AATACCTCTTGGATCGGAGTACGCGACATAGGAGAAGAGGGAGAA**GAAA**ATAGAGGG**GAAA**GGTTCGTT**TT**  
**TAG**GGAGCTGAGATCCTCCATC**TAAA**GGGTTCCCGAATCCATCAAGGACTCTTCC**TAAA**AGATGGTTGGA  
TAGAGGAAGAGAGGCAGGCCGCGTAAGGGAACACTTCCGGCTCCTATGGCAAGATAGTATATGGGAGTC  
AGAGCGAGTAATAATGTCGTGCGATTGTGAATGCCAATTACTTCAGCTAGAATAGGGTCTGACCGAGATA  
GAG**GAAA****TTTG**ACAGAGTTCTCCTAAGCATGCGGAGAGCCCTTGAGCTTCCAGAAGAGATCCTGATATGCG  
TGAT**TAAA**ATCCACATCTCGATACGGGCGCCATTGATGGATCAACAGAG**TTTC**TTCTTG**TAAA**TGAGTC  
ATACCATGTACGTGGTTAGGGGATTCCTTGGTTT**TTTAG**GGATCTCTCGTACGTAATG**TTTG**TAGCTGATG  
CCGC**TTTA**TGGAGTGAGTACACTTAGTAGATGGGACAGCTCTTCCCGATGTCTTGTCTCAGAATTCCTG  
AAGGGAGTTCTAT**TTTA**TAGCTAGC**TTTC**TTGCA**TAAAG**GATCTGCAATGAATTCGATATT**TTTG**AGTAA  
GGGAACATCGTGAAGGATTAACCA**TTTAG**ATAGG**TTTGAAA**GATCTTCAGGATG**TAAA**CCTATT**TTTA**TG  
GGAGAGACGGCATAAGTAGC**TAAA**TGATGTTGCAGAGCTGCGGAGATTAGGAGAGCAAGTTCTTCTGTAC  
AGGCAAGC**TTTC**TGTACAG**GAAA**TT**TTTC**ACAGACGAGGACAGCAAGTTCAAGAAGCTCAGGT**TTTAG**TTT  
**CT**GAGATAAT**TTTC**GAT**TTTC**ACAGAGAGAAGATGGACAGATAA**TTTA**CGGAACACCTGAATAAGAG**GAAA**GA  
AGCTCATGGGAGAGAGCTT**TTTG**CT**CAAAG**AGAGGGTG**TTTC**TATGGGTAGTTGTGAGTTATC**TAAA**CACG  
CTAGGGAACGAAGATGAGGAGAAGCCACGTAATCCTCCAAGTG**TTTA**TGTTCTTAACCTCAACACAGCAC  
TCTTCA**TTTC**TTCAGGAAG**TTTA**TTAAGAAGTTCTTCCGCT**TTTG**CTGAGTCTAGATAGGAGAGAATCAA  
TGCAACTT**TTTC**TGGGGATTCTCT**TTTC**ATCATCTCTATCAGC**TTTG**GTATA**TTTA**TGCTCTGTATTTT**TT**  
**TCT****TTTC**TGTTGAGAGACATGGTCATAGGTAT**GAAA**AGCAAGATAGAAGGTAG**CAAA**GCCTAGAATTCCAA  
GGCTTAGTAACACAATAGTAATACTCAAGACAATCGAGGATAGGCGAGAAGT**TTTG**TGTGCTACGGGT**TT**  
**TAG****GAAA**GGGACAATATCTACAGACGGATGCA**TTTC**TGAGAATGCTGAGAGAATCTCTTGCATATGCGAG  
AGCAACTTAACACGTGCACCT**TTTA**GGAAGAGTATTGAGGTAGTCCATCGACGAGAAGTTG**CAAA**TGGC  
CTTCATCCGCTACAGGAATATAG**TTTA**AGGC**GAAA**TGCG**TTTG**AGGAAGAATCG**TTTG**TAGTGAGCGTTC  
TAATGAGGTAGTGAGTAGGGTATTAC**TTTG**TTTGAAGAGCGGGGAGTAGAGATTACCATGCTGATCGGAC  
AAGGTGATATGTT**TTTA**AGTTAACCCAGGGACGCTGCGTGTGAGGTAATCAGTGATTGAGTGCACGAGTG  
ATGGGGATAATGTGCAAGCCTGAGGAAGA**GAAA**GGATCACGGAGA**TTTC**TGCTAAGGAGTCTTCTTCTTG

GGATAGAGCAACCGTTGCTTGGAGCACAGGCTCAAATAGAGTCAGATCTTTTCTAATTGCTCTTTCTTT  
GCTTGATTTTCTATCGATTGAAGATTCCCATAATGGGAGAGCTTCAGCCAATGTGAGGGTTTTTTCTCTG  
TAGAGGCTACAGTAGGGTAGGCTGAGGAGAGGATGGTTATACAACATGATGAAGCCAATAAGAATAGC  
TGCAAGAAGGTAGCCATAAGATTAGTGGAGGCGATCTTATTTTATAGAAAAGCGAGGTAGCACCGGCATT  
CTCCATGAAGTAAGTTCTTACAAAAGCTCCACGTATAGGTTGAGGAATAGAGCAAGGGTAGAGCCCGCTA  
AGTATCCTGCAAGAAAAGGATGAAAAGAAGGCTTCTTCTGTGAACAAGAAAGAAAATTAGCATCCGG  
GATGACCAAGAAGCTCAAAAGGGGCTCTCAATATAAGAGCCCTTTGTCTTCTGTAACAAAAAGAGGCT  
ATATAAACAAATAGGTTATCTAAGAAATTTTCGATAGGATTTTGAATCAGTTTAAAGGGATTTAAATA  
GTAGAGACTGTTTCGTCCTTTTATTTCTAATAAAAAGGATAGACATGAGCTCGAAAAGAGCTGCCCTATCGA  
ATTGAGAGTAGATCTACAGAGGATAGACAGGACGAACAATTTTCTGAGTAGGCAATGGTTACAGTAAGC  
CCTTCGAAATGAACGATGCGAACATCTCCGGAATCCACGGCGACGAGAGGTGCTATTTTCTCTTTTCATCA  
TAGTATTCATGCTGAGAGCTGTTCTGTCATGGGAGAGAGCTCCCCACTCTTCTGTGGAGTAGGGATTTCC  
TTGCTAAGCTGAGATAGTGCATCTTTGAAAGGGGAAAAGGGCTGTCAATCACGGGAATATCCACACATTGT  
TCAATAGCAATGTCTAAGGCATCTATGACTAGATGGTAGAGAGGAGAGAGGTCTTCTAGGAAAATGGAAG  
GGTGCGCGTGTCCGCGGACTTCTTGGTCTAGATCATTAATTGTGATTTTATACGCTTCGGCAAAAAGTTT  
CCCAATGACTAAAAGAGCAGGTGGCTTCAGCGAGTACAAGGAGATAAGGGTGTCCGAAATATTGAAATTTA  
GCTTCACGGATTATGCCATTGGTTTGTCTACCAGCCAGTAGAACAGCAAAGTGTTTCCCATGAGTAGGT  
GCCCTTGCCTTCTATGACAAGTTGTAATTTCTTCATCCTCTTGGTCTGCGATAGGGCTCCGCCATGTTT  
AGGTTGGAAGAAAAGCGTAAGGATCTTGCAGGGAAGCTCCCCATAAGGGGAAAAGGATAAAAATGGAATC  
ATCATAAGGATTGAGTAACCAGTGGTTGTAGGTGAGAGATCCCTTCTTGTAAAGCGGTTGCTAATGCAGA  
GAAGTGTGTAGTAGGAGTACGTTTCAATAAAGATACGTGTAAAAGCGCTGTGGCATAAGAAGGGAGAGATG  
CCCGAACCTTGTAAAATCTGCGATAGAGGCTGGAAGCGTTCATAGCCTAACCCCTACAAAATATTTTCT  
GGGAAAAGAAAATCCTAAGGACTCTGCAGGGATAACCAGGAATAGCAAAGACAGCGACATTAGGGAGACG  
AGGGGCACTGTCTTCAAAAGGAATTCGACTTGAGGAATAGCGGAAAAGAGCCTGTTAAGAGCTGCTCGA  
GAAGAAAATAGCAGAAAACACAAGAGAGGAGAAAAGCGTTGTACGTTTCTGACAGGCAAGAGAAAAAGCTG  
CAAGAGAACTGAGGCAGGTAGGGACTTGTGGATTACTAGGAAGCCATAAGGAAAATATTTTGTAAAAGC  
GGGAGAAATAAACATCGCTCCTGAGGGACCAATCCCACCAAGAGACTGTGAAGAAAAGTAAGGATATCT  
GCTTGATAGAGTTCTGCGGGTAGCGCGCATCTTCTAAGATATCACTCAGGTCTATGTGAAAATTACCC  
CGCGTCTTTTACATAACGCAGCAAGCTCAGGGATCGTTCCAGAAAATCCTGTACATACCATTGCGAGCAGA  
TATGAAAACACGAAGGTCCGCGGGGAAAAGAGCTTCTGCTAGATCGGATTCTTTTACGCGGCCGTTTTTG  
CTGGTTACCCAATCATAGGTTGTCCCTAAGTTTTCGCGACGGCAGAGAGCATTGATGATAAAATTGTTGCT  
CGAAGAAGGAACAAGAAGGTGATTACGCCCTGGAAGGCATTTTGGTTTTCAGAAAGAGCGGCCACGAT  
AATGGCCGTGACATTCGGGTAATGAAGAAATAAATGAAAGGTAAAAGCCTTCTCCTGACACCCCTGTGAGT  
TTGCGGGCAGAAGCTTCAGCTTCTGCTTGTAAAAGTCAAGATGGAGGTAATTTGCGCTGTACGAAAATACGT  
CTGCGTAACGTTGAAAAGCCTCTTTTACCATTTCGGAAGGAGGATGGCTTGTGTTGTTTAAACCAAGA  
GAAGGAGCGTGTTTCTGTGAATTTTGTCCCGTCCATTCGTATACAATAGGCTGTCTGTTGGCAACTCCA  
AAGAGAGTACTTGTCTTCAGATAATTTTCTAGGTTCCATAATTAAGGAGCGCAAAATCCCGTGAGC  
AGAGATAAAAATATTTTCCCTGCTGAAGGAGAGGAAAATCTCTCTTGAATAAGGGGAGGGTTTCGT  
TGCCCTGTATCGAAAAGACTTTTCGCCCTGAGGAGGGGCAATGCGGTAGCTTCGGCGCCACAGTTTACCT  
GTTCTTCTCCGAATTGAACAGCGACTTCTTGTATAATTTTCTCTTGGAGTTCTCCGTACATGCGTTTATT  
GAGAGCGCTAGATTGAAAAGAGGGATCATCTGCTCCAATTTCTTTTACTATGAATCCGGCTCATGTGCG  
GGGCGTCTTCATGAACGATATAAGGAACTTTTGTAGAGCTGTGGTTAGTCATTGCTAACAGGGCTGTCA  
TCAAACTTCTAACCAAGGTGGAAGTGAAGATGCAATCAATAGGAAGATGTTTAAATAGATTCTCCAGCGGC  
AATAGCCTCTTGAATTCCTTGTGGCTAAGAGGGATGTCTACCCAGCCTGTAAAAGATTTTGTATTCT  
CATACGGATTGGCCATGGCGTAGCAAGATAAGAAGCGTCATAGAGAGCAAGATTTAAGGATGATTACGAA  
AGGCTTCATCTTCTTGTGTTGCGGATTATCTTTGCAAAAGATTTTAACTTATAAGGGAGGGGGAACTC  
TTCAATTTGTGAGCCTCTTAGAGAGGAGAATCTTCTGACTCTCTACTGAAATCTTGATATGATGGGGG  
TCGTTTATAATTTTACCCTTGAATCTAAGAGAGTTCCCGGTGTTGTTTCGGAGAGAAGTTTCTTAGATA  
GTCGCTTATTAGTGAATTTCAAAATATTAAGCAGTCAAAAGACAAAAGGACTGGCATGGCAAAAGTTCCG  
CTCAAATAAATTTTGTGCATCAGCAGGAGTTGCTTCGCGAAGAAAAGTGTGATGAGATCATTTTGTCCGGT  
CTGTTACCGTTAATGGTAGGGTGGCTACAGGCCCTTTGTGACTGTTGATGAGGAGTTTGATTCCGTAGA  
GGTAGGGGACAGCGTATCGGTGCTGAGAAAAAGTGTATTTTCATGGTGCAAAAATCTTGGGTATCTT  
TGCTCTTCTGAGCGTAAATTTCTGGATCAAAAGTTAGTGATTGACCTGTTGTGCACTGCCCTTACCGGT

TGTTCACTGTGGGCCGTTTGGAATAAGAGACCTCAGGCTTAATTTTGTTACGAATGATGGAGAGTTTCG  
TAATCGGGTGATTCATCCCTCTTTCGGTATTACCAAGAGTATTTATTGAAGGTAAGTCGGGATGTCACA  
GCGCGAGATTTAGAGACTTTGATGGCAGGGACTGTGATTGATGGGAAAGTGGTACGTCCAGTTTCAGTTA  
AGAAAATCCGCCGCGGACTATATAATTATTGTGAATGAAGGAAAACAACACGAAATTCGTCTTTTGC  
AGAGGCTGCAGGGTTACAGCTTCTGGAAGTTAAAGGATTCGCATAGGGAGCTTGGTATTAGGGGGCTTA  
CCTTATGAAAATATCGGGAGTTGACCGATTCTGAGTTAGATAGTTGCTTATCAGGAAATCTGTGGCTC  
TCGTCGCTTAGATTAAGAAAGTTTGGTCTTAAGAAACAAGAGGGAGGTCTTCTCCCTCTTTTTT  
TTGTTAGAGGTACACTCAGGAATTAGGGCTTGTAGATAACGAACTCGGGAGCGGATATGCTTTTTG  
GGGTATTTTAGTTGTGCTTAGGAGGGTTATTTCGGGGTTATTGTCGCTTGCCTATACAGCAAGGCT  
CTTTGTTATCCTGGCGACAACCTTTCGGCTTGCCTTAAAGAGAGAGGTTTACAAGAGATCGCAG  
CGTTGCAACATTCCCTCTCCTTCGTTTGAAGAGGAGATAGCCTTTTAAAGCAAGGCTCCTCCTATTC  
TTTGAAAGAATTTCTTAAAGCTAGTGATGCGGATGGAGTTACTTTCATGAGATGGAACGATTTTACT  
CTCCGATTGAAACAGACATTAGCATCGTTGCAAGAAAGTTGCATCAAGAGGCTGTCCAGCATTTAATGG  
AAGAACTACTTGCATGAGAATGCGTTTCTTTGAGGCCTTTGCCTTCGAAAAGCCGCGGAAACCTA  
TACGACTCTTACGGTCATCCGGTAATCCGATTTTCGGAAGCTTTCGTTTTCGCAAACTCCTTT  
CCGCCTTTAGATGAAGCGATATAGATACGAATAGGAGCTGTACGAGACGAATGAAAGAAATCTATTATGA  
AATAGCACGTACGGAATCAACGAATACGACAGCAAGAAGGGCTTTCCTTGTGGGATCCCTATGCTCTC  
ACAGTGATCACGACCAGAGAAACAAGCGCGGGAAGAGGAAATTTGGAAGGGCTGCGCACTCCACAGATC  
AAGATCTTTTGGCTTCGTTTTGTTCCTTTTAAGTGTGAATAATGTGGACAGTGCCTTGTATTATTCGTAT  
AGGGACAGAAGCCGTGATGCGTCTCGGGGAATCGTTAGGCATTCAAGAAGCTGTCATGAAATGGCCTAAC  
GACGTGTTAGTTCAGGGGAAAACAATTTTCAGGAGTGTGTGTGAGACCATCCCTGTTAAGACTGGAACGT  
GTGTCATTATTGGTATCGGTGTGAATGGTAATGTGGGTGCTGATGAATTGCTAGGTATTAATCAGCCTGC  
AACGTCCTCCAGGAATTGATAGGGAGGCTGTAGATATGGAAGAACAGCTTAAGCGGCTCACGAAAGAA  
ATCAAGCATCTTATCCAGACGCTACCGTTATGGGGCGAGAATAAGGATAGTTAGTATTTTGCAAGCGT  
CGACTGTAGATGCTTTTGTAAATATCCATAAGACCATAGTAGAAATTACAGAAGAACCTCCATAAGAA  
TTAACACCAAGGGGACTCCGGTAATAGGCAGGAGACCCTCATCATGCTGACATTGATAAGTACGTGCAT  
GACCAGGTGTACGGTCACTCCTCCAGCTAAAATCGTCCAAAATCATCAACCGGACAGCCACAGTACGG  
CAGCCGAAACAGACTAAGTTGTAAACAACCATAATACGAATAAGAGTCTAATAGTCCGAATCTTCTC  
CTATAGCAGGGAACACAGAGTCTGTATATCCGTAAGGAAGCCAGCCCCTCCCTGCGAATTCGCCAGATTT  
CCATCCTTGGCCTTTTAGCCCTCCTACTCCAATGAAATAAGAGAGGCTCTTTGTTGATGGTTGGAAGG  
CTGAGCCGTTCTGACTGATATTCTTTTAATACTTTAAGAGCATAAGGTTTTACCCTTGTGATGAGGGATAA  
TCCCAGAGAAGATTAGTAGAGAGCAGAACATGCCAAAGCGACAAGCACAGAACAGACTTTGACTAGTGG  
AGGATAGATATTTCCGAGATAAAAATGGTAAGGGCTATTGGGCATAGCACCAAGGCTGTTCCAGATCC  
GGTCTTTTCAAGATAAGCAGAAAAGGAATCCCACAATAATACATGCAACGAATGCTGTCGTTTGAAG  
AAATCCGTGCTTTGCGCATCTCTAGAATATAGCTTAGCATAATGACAACGGCAAGTTTGGCATATTCGA  
AGGTGGACGCTAAGATTAATAATGGGTATGCGGTACCAGCGGTGTACATTTTGTACAGCGGGCACGAAA  
AATAGTCCAATAAGACTGAAAAGAATCAAGAATAGAGAACCCAAGCCATCTTTTGAATTGATGGTAGT  
CTACATAAAGCAATGAAGTAGGCACACCATCCTAGAGCAAGTGATCCAACGTTTTTTGGCTTTTGGC  
AGAGAACAGCCCTCGTGAAGTGTGGACTAACATAGAAGAGGGATCTTGAGAAGAGATCACAAATCACACTT  
ATGCTCATAAGTAGAATGATGACTACAAGACCCACAAGTTCACCTGACGCAAGTATTTGTTTTTTTCA  
TAACAGGGATGTTATTCGCGTCCCTTCCCGAAGGGAAGGAAGTCTTGCTGTTCTGCCTACAGATATTCCT  
TCATTATAACAACCTCGTAAGCGGTGATGTGTTTTTTAAAGGCGAAGAGCGTTAAGTCCCACGATCACGGT  
GCCCCTTTATGCAAAATCACAGCAAGCCATAGGGGGATCACTCCCATCGATGCTGGTCCCTGAAATAAAT  
AAAATAATTGCTAGAGCTAAAGCAAGATTTTGCAGAAACAATCCGACGAGTTTCTTTGCTTTATCAATAA  
GCCAAGGGAGAGAAAGAAAGCCCTTGGTTTAAAGCACCACATCCGCGGCTTCTATTGCTGTTGCGCTTCC  
AGCTTCTCCCATGGCGATTCCCTACAGTAGCCTGAGCCAAAGCGGGAGCGTCATTGATGCCATCTCCTATC  
ATCATGATCTGCCGTGATTTAGCAAGCTCTTGAATTTTCGAGAGCTTGTATTACAGGAGTCAGGTCGTAGA  
ACACCTCATCGATACCCAGAAGTCGAGCTGTATTTTCGGCGCTGATACGATGGTCTCCTGTGAGCATA  
TACAGGATACCCATCTTTTCAAAATAGGATACGATATTTGCAGCATCGTGGCGTGGGACATCCCGGAA  
TAGAAAAGGGAAAACAGTTTGCCTAAGCAAGCTATAGAACATGTGTCGCCGCGTCTTGTAGCTTGTGAG  
CGGTTCCGGAAGCTGTTACGGTATTTTTCAGGAACGTAACGTAGCGCCGTCGAGACGCGCCCTACA  
GGCTTGTCTCCGTAAAATTTCTCCGCTTACGCCCTCTCCTGGTATCGTTGTGCATTTGTGCTGCTGGTAGC  
GACCGAACTTGCTTCTCAGTGAGGTAGTTGACAATGGCTTGGCAATAGGATGAGAGGACGACTGCTCCA



TAGCCAATACGCAAGAA TAAA ACAGAGGCGATTCTGGAC CAAA ATCTTCGCATCCTGAACAGGT TAAATC  
TCCTGTAGTAAGCGTCCCGTCTTATCCATAACTACAGAATTGCAGGAGACTAGACGATCTAAGACTACG  
CCGCCCTTAAGCAAGACACCATG TTTA GCACAAGCATTAAATAGCGCTAAGATAAGCAATTGGAATAGCTA  
TGATAAGAGCACAGGGAGAAGCTGCAAT TAAAA ATGCTAGAGCGCGG TAAA AGGCACCGTCTGGTCCGAG  
GAAA GGCAGTGTGTGAATAGAGAGCCTCCTATAGCTATACATGCTGAGATAGCGAAGATGGTTAGAGCA  
TATGTTGATGAATAGCGGTC CAAA CGTTGTTGTAA TTTAGG TTTG GAGC TTTG CGCTTGAACAACCAGAT  
TGATGATGTGAGCAATCGTGGATTCTGCACCGATGCGGAGGACCTGGAGAT CAAA GCTCCCTTCTAAGTT  
ATGAGCCCCTGCAGGAATAGTATCCCAATGCCACAAGA TTTA GGGATCTTTTC TCCAGTTAGATGCATG  
AGATTAATAGAAGAGGCTCCGTGAATAAT TTTCCATC TAAA GGAACAACCTCTCCACTTTTTA CTCGGA  
TAA TTTCTCCAAT TTTGACGT TTTG CAC TAAAA CT TTTG CAGGGATCCGTCTTGCTGAACGACCCAAGC  
TACAGTGGGTGC TAAATGT TTTA AGGAAGCGAGAGTACT TTTA GCC TTTCCGGAGACCATCGCTCCTAAG  
GATTCCGAGATGG CAAA GAGGACCAAGAG CAAA GCTCCTTC CAAA GCCCCTCCAATGAAGATAGAAC CAA  
AGGCTGCCGATGTCATGAGAATATCAATG TTTA CGGTTCTATCCAGAATATCTT CAAA GGA TTTA ATGAG  
AGCGGGAGTTCCCGCTAA GAAA AAAAGTAAGAATGAGAAG TAAA GAGGAGAGAGCCTGATATCCTATCCAA  
TGAGAAA GAAGCGATCCTAAGTA TAAA GCCAAGGAGATATAGGCAGAT TTTA AGGT TAAAT TTTG GCTTA  
AACGACGGTTTT TTTGAGAGAGCAGAGGGCTATTTCTTTCCGCCATCCCTGATT CAAAAAATCGCTGAG  
TAATTTCTCGAGAAAATGGAGAG GAAA AAAAGTTGCGGAGACATAGGCCACCTACTAAGAGTATGAAC TAAA  
ATAATCGGAT CAAA GAGCAGCAGAGGCTAATTGCAGTAA TAAA CATCCCTACTCCCAGACAATGGCAGG  
GGTGATCGCGTTTT TTTA TCAGGCGGT TTTT ACAGCGAATAAAACGCCTATCATGAAGGAAGC TAAAATC  
GCTGCGATTGTATAGCTTACAGCAAGTGTAAATTGGGG CAAA TAGGAGTAATCCAAGAATCCCGCCAAGCG  
C TTTA ACG TTTT CTGCTTGAGGGATGAGGATAATCTTCTAATTGAATATGCAACTCTTCTCGGAGCAT  
CGTACTTAAAGAGAAGAGAGGAGTCGGAACACACAAA ATCGAGCA TTTGTGAGATCAGCGGCTCCT GAAAT  
CCTTGA TTTG CATAAA GCACCGCTAATTCTATGCGTTCTTGTCTGGG TTTG TCTCGATCTC TTTCTTTT  
CCTGTAACATATTTCTATGCGTCAGTTCTATGTAGGCCATGCTGCTTGAGCTCGCTTACAGCTGGTATA  
AAAAATCCAACCTGATCCAGTTGCGAATAGGATT TTTT CATAAGAGGTTACTGGGATTGCAGGGACTAGA  
AAGAAGATGGTGCGAA TAAAAAATAGAACAACACCACAATCAATAGCATCACAAGTCAGGTGATACCAAT  
AACCTTTTT TTTG TCTGATGAGGCTCTCC TTTG CAGAC TTTATG CAAA TCTTGAAC TTTG ACATGATC  
CTCCGAGATAAGTTACCGAAGTGCTCGTATTCTGATGCCATCGTGCCGCTCCTCTAGC TTTT TATCTCA  
CTATAAGTTATCTTACC GT TTTG GGTAGGAGAATCTCTTGGTTATTCATATAGGGCGAAGAACAGAAG  
GAATGACGACAGAGCCATCCGCTTGCTGATAAT TTTCTAAA ATAGCGACCAACAATCTTGGCGTTGCCAA  
TCCAGAGCCGTTTA GAGTGTAAACGAAGTGCAAT TTTACCTTGAGCATCTCGATAGCGTGT TTTT GGATCGT  
CGAGCTT GAAAATCTCCGCATTTAGAAA TAGAGGAGACTTCATAGAACGCTT TTTG TCCTGGGAGCCACA  
CTTCTGCATCGATCGT TTTT TTAGCAGTGAATGACATGTCTCCTGTG GAAA GTAAG GAAAGCTGATAGGG  
GAGTTGCAGTTCAGACAGAATTTT TCCACAACATGAAGCATT TTTG ATAGACAAC TTTCTTCTTGTCC  
GGAGTAGT GAAAG CAAA CATTTC TAC TTTG TGAAC TGA TGGACTCGCACAAGTCTCGTTCTGAGCTC  
CTCCAGCGCCAGCCTCTCTGCGGAAGCAGGGAG TAAA TGCAGCATAACAGAGAGGGAGATCTTGCTCAT T  
TAGAA TTTT TTGAGAATGGAATCCATTGAGGACGACTTCTGCTGTCGGGATAAG GAAA AGAGACCGATCT  
CCATCTCAACACGGTAATACTGTCCATCGAACTTAGGAATTTG TCCTGAACCGAAGAGAATATCTCG T  
TAAACAAGTAAGGGAGGGAGCCACAAT T GAAAGCCATGTGCTTGTCTG TTTA TTTA CAGAAGATAAGTAAGCAG  
AGCCCATCTAGAAGAACTCCTTCATTACAATAAGCCGGCCAGCCAGACCCTGTAGT TTTG GCAGGGAG T  
TTAAA GTC TAAA TTTG CAACGCTTCATTAAGTTGCATATGGTGT TTTG GGGAGG GAAA GAAAAGTAGGTA  
CCTCACCGTGGCT TTTA ATCAT TTTG TTTCTCTGT TTTA TCAGGA GAAACTGGAACATCTTCATCTGGATA  
ATTAGGCAGTCTCGCCATGAGATCTTCTAGAAGTGCTTCTGTCTTTG CAAA GTTG TTTCAAATGCAACG  
AGTTGATCTGCAATAGTATTCACTTCTTGAATCAAGGCGTCAGCAT TTTT CGTTAGCAAC TTTA GC TTTA T  
GAATCTGACCAGATAATACCTTACGC TTTG CAAGCAGAGCTTCTGAATCCGCC TTTA ACTGACGCACAGT  
TTTA TCCAAGTCTAGGAGGCGTTC TAAAGAAA TAGCGGGATCTTTTT TTTG AAGACGGC TTTT GCACTCT  
TTTG GTTCTTGGCTATTAATCGTATATCCAACATCCTTGATCTC TTTT CGTATCTGATT TTTT CAGGTT  
GAGTATATGGAAGT TTTG TCTGAGCAACAAC TGT TTTA TATGCG CAAAGCCGTTGCCTTAGGAGAAA AGG  
GAAGGATT TTTG CTCCACCAATCCTTGGGTGGGATGTGTGATTG TAAA GAATGGTTGTGTGATAGGTGA  
AGGTTGGCATCAAGGAATCGGTTCTCCTCATGCAGAGGTGTGCGCAGTTCAAGAT CAAA AATGTTCTTTA  
GAAGGAGCTGAGGTGTATGTCACCCTAGAACCATGTTGTCA TTTT GGTAGGACGCCACCTTGGGTGGATC  
TTTTA AT TAAA AGTAAGGTTGCTGCAG TTTA TGTGTTGCTTACTAGATCCGGATCCGCGTGT TTTG TAAAA  
AGGCGTAGCCCG TTTG CAAGCAGCAGGGATTCCCG TTTA TGTGTTGGGTAGGGAGTCAGGAGGC CAAA ACT

TC TTTG CAACCTTATCTGTATCAACGAGAGCGGGGATTGCCATGGGTAGTGAT GAAA ACAGCAGCTTCGC  
TAGATGGTCAGACCGCAGATCGAGGAGGATCATCGCAATGGA TTTC AGGAGAATTAGCTCGGGCGGATGT  
AGG GAAA CTTTCGTGCAGAGTCTCAGGCTATAATTGTTGGGGCTCGTACCG TTTGTTTA GATAATCCGCGT  
TTGTCGGCACGGTTCCTCATGGGGATTATAT GAAA GACAGCCATTAAGAGTAGTGGTAGATAGTCGCG  
GAACAGTCCCATTAGAATCTAGGGTATTCGATCTCAGCTCAGGGAGTACGCTA TTTG CTACGACTCAACA  
GTGCC TAAAGAATATATT CAAA AATT GAAA GATTTA GGAGTAGAAGTATGGGAATCTTCTTCATCAG  
GTCGATCT CAAA GGGCT TTTG CGCTATCTGGCAGAGAGGGGTG TTTA CAGGTGCTTGTGAGGGTGGCG  
CGCAGCTACACTCCGC TTTCTGGCAACAGAAGCTCGTCAATGCAGGGGTCA TTTA TTGGGGGCCGAAGTT  
TTTG GGTGATCAAGGGCAACCTATGTTGCGAGATCTTCAGCTAAGTCTGGTTACAGCAGAACATGTAAGG  
ATTACA GAAA CTTT TTTA GTTAGGGATTCTG TAAA GACATGT TTTG AATGTTTG GAGCAAGAGAGTGTAG  
ATAAGAAGGGTTAGGGTTCGCA GAAA GTAGAGG TTTG TGTATACTCTGCGCACAGCGAGGGGATTATAGA  
CAAA GAACG TTTT CCACTGGCTAAGT TTTCT CAAA AACGGGGTAGATTGAGAATG TTTA CATATGAAGC  
TGGGATAGCGTCGGTACAGCAAGCGA TAAA AGATGTCGCTGAAGG GAAATTTG TCATAGTTATTGATGCA  
GCATCTCGA GAAA ACGAAGGAGACTTAATCCTTGCCGGA GAAA AAGTCTCTACAGA GAAA ATGAGT TTTT  
T TTTA TCCCACACGACAGGTATTGTCGTGCTCGCTCTCTCGAGAGCAGG CAAA ATC TTTG GACTTGCC  
AGCCATGGTTCAAGACAACCAATGTGCG TTTAAA ACCGCT TTTA CCG TTTT CCGTAGATGCTTCTTCAGGA  
GTGACTACAGGTGTGTCTGCGAGTGATCGACCAGAAGTGTGCAATGTTAGCTGATCCGGCAGCGACAG  
CCGAGTCC TTTG TTCGACCAGGGCATGT TTTT CC TTTG ATCAGTCAACCTGGCGGTGTAGTTCAACGTCC  
TGGGCACACCGAAGCTGCTATGGATCTCATGCGGCTTGCGAGGTATGCAGCCGTGTGGTATT TTTG CTGAG  
TTAGTCAATCCAGACCCTCTATGATGCGACAGCAGCAGGTA CTGCT TTTG CTGAGCAACATGA TTTAA  
CTGTTATTACTGTAGATGA TTTG ATTACTTATCGATATACCTATGATTCCCTCGTTAC TAAA ATCTCATC  
GGCGGATTACCTAC GAAA ATACGGAGATT TTTT AATCTATG TTTA TGAGTCAATCATCGATGGGACCCAG  
CAT TTTG CATTAGT TAAAGGAGATATCCATGAACAAGAAGCTGTTCCAGTGCCTGTCATTCCGAATGTC  
TGACTGGGGATATTCTGGGGTCTTGTGCTTGTGATTGTGGAGCACAGCTAGATATGGCGATGCGGTACAT  
AGCAGAAGAGGGGCTGGGAGTTATTGTTGTATCTTCGAGGCCAAGAGGGGCGCGGTATCGGT TTTG GACAT  
AAGATCCGCGCATATGCGCTTCAAGA TTTA GGGTTATGATACTGTTGATGCGAATCTTCAATTAGGGTTCC  
CTATAGATGCTCGTGAATATGGCATGGCTGCTCAGGTTCT TAAA GACCTTCAGTTGACAAGCGTGAGACT  
GATCACCCATAATCCA GAAA ATTT TTTG AGTTACAGCGGTTAGGAATACACGTTCTTGACCGAATTAT T  
TTG CCCGTCAGTAT TTTT TACC GAAA ATGAGGGGTAT TTTG CGAA CAAA AAAGGAACGCATGGGGCATTGGT  
TAGATCTGCCCGTTCTGGATGATGTGGAGGAGGAGTAT GAAA CCGTT GAAA GGATGTCCTGTGCTAAGG  
ATGTGCGTGTAGCTATTGTTGGGT CATG TTTT AATTCTCCTATCGCTGATAGGCTTGTGCTGGGGCGCA  
AGAAA CTTTT TTTT GA TTTT CGGAGGATCCTTCTT TTTA ACAATTGTCCGAGTCCCTGGGGCG TTTG AG  
ATTCTTGTGCGATTAAGAAA TTAC TTTT CACCTCAGGACAG TTTT ATGCTGTAGTTGCTTGGGAGTGT  
TGATTCAGGGCGAGACATCGCATTATGAACATATAGCAGATAGTGTGGCTGCAGGTGTTAGTCGCCATC  
CTTAGACTTCTGTCTTCTATTACAT TTTT CCGTATTACTGCTCCTAATATGGAAGCGGCTTGGGAGCGC  
GCGGGTAT CAAA GGGCCCAATTTA GCGCTTCAGGCAT GAAA ACAGC TTTAGAAA TGGCATCATTATTCT  
CTCTGATAGGGAAGGAA TAAA ACGGTGTAGAAA AAGAAGAACGCCTGAT CAAA TCAGGCCTTTTT TTTGA  
TTA TAAA TGATACTAACGGTTCCA TTTA AGTGAA TTTG AACAGCGACATTCTCG GAAA AGATATCCAAT  
CCTTGGCAAGAAGCTGCAG TTTT TGAGAAATC TAAA ACAATTTT CTTAGAAA GAA TTTGCTTG TTTAGCA  
TTTCTTTA TGCGC TTTT CAGACTC TTTG CTA CTAGCGATAGGGTAGTTGCATAAAATTTG CTGAGATCGAGC  
TTCTGCATTGGTATTGCCACGGG CAGTTCCGCTCAGTTCCGATACAAGTGTAGGCAACCCTCGCAGAGAA  
AGAGCCAACGAATCGCCCTTATTGGTATAGAAA CTATTGAC CAAA GTATCCGCTTCTTCTGTAGGAAGGG  
TTTTG AAGCTTGTGGT TAAA ATCGCAGCTTCGGAAGGAGACAAGTTCATCAAGGTGGCCATTCTTACTAA  
AGCCATCTCGGATCGAGAAGAGCCAT CAAA TCCTAATCGATTAGCTCGGTAAG TAAA ATAACGA GAAAAG  
GCCTCTTCTACAGTAGCGTATTGTTGCAACATGGACTGTAGAGGTGCGAAG TTTG TGTGGAATTGAGAGG  
ACATCCCCTGTTCTCCACAGGAATC CAAA GCATAGAGGTACAAGTCCAGAGC TAAA AGAGCTCGTTGCCA  
GCGCCAGCAGACAGAAGCT GAAA ACTTGGGGTGTTCGTGAGGAGGTA ACTCATCGTAATTGCCAAT  
TTTCTCAAGGAGAAGAAGAGAGT TTTT TGCTCCGGAGAGAGGCGAG CAAATGATGGGCTTAGCTCTGGGA  
AGGTGTGTAGTACATGCAGAGCCTTAGTG TAAA AAGTCTCTC TTTG CATTTCTGA GAAA TAAGG TTTAAA  
CGCAGCAACAGCCTTAGTGTGAACAGCCTAAGTGACGTAAGACGATAGCTGTCTCTAACACTTTA ACAGAG  
TCA TAAA ATTCCTTAGGGGAA TTTAAA AATAGAGTTAATTGCTTATGCAATGCAAGGAATTGCT TAAA TG  
TTAGAGGGGATTTCGCTGGTCTGTAGTTGGATCAGTTGAGCATAGGCTTGGCGGGAACCCTGGATTAATAA  
ATGTAAGTGAAT CAAA CTGCGCACTGCGATATC GAAA GCAGGGACCTTTTTTTT GAAATAATGTTGGAGAA

AAGATGGCTCCTGAAGGAGATTTTAAAAGAGGCTCCCGTAGAGGACGGCTCTACTAACCATAAAAAGCTCTG  
GATATTGGCGGACTTTTGTTCATC CAAACTTCTGATCCAATT TTTGTGGTCGAGCTAGGAAGCGTTCC  
GCCAGTTGAGGTGCTGAGAAAACAGGGACACTAGACAGTGTGACAAGGAA CAAAAGACAGTTGC GAAAAG  
G TAAA GTTTATTAACATATGATCCTCTGCTACTCCGGGCTTCATCCCCTTCTTAATACGGATTAGAGGG  
GTAACTTGTAAAAGAGCTTAACGGGGAGTTGTGTGGTTGATATCAATAGCCGGTGGCAAGCCTA TAAA AAG  
GGCGTTGCATAGAGTGTATTCAAGAAG CAAA CACCCTGTAGTTCTCTGGATTCCCCGAGAGATTCTACCG  
GCTTCATGCTAACATGATTT TTTG TTAGGGGCAAGGTTCTTG CAAA GATCT TTTT CATTCTACCCAGAGA  
GGATAGAGAGGGATTGTTAAGAT TTTA TTTGATTGGGATGTTGAAGCGCC TTTATAAACTATTTA GTTA  
ATAAGA TTTGTGCTATAATACTA CAAATTTATTTTAAT TTTG GCAGG TTTAT GAAA AAGTTTA TCTATA  
AGTATAGC TTTG GAGCTCTCTTGTGCTCTCCGGGCTCTCCGGATTGAGCAGCTGTTGCGCCAACCTCTTA  
TGGATCGACTCTTG CAAA AAATACAGCCGAGA TAAA AGAAGAATCTGTTATACTTCGCGAGAAGCCGGAT  
GCCGGCTGTAAAAGAAA TCTTCTTGTACTTGA GAAA ATT TTTT CCGCGCAA GAAA C TAAA GAGAAGA  
CAGAGCCTGTGTTGCCGAAC TTTA AGTCTTACGCAGATCCAATGACAGATTCC GAAAGAAAAGACC TTTT  
TTTCTAGTGTCTGCTGCTGCTGATAAGTCTTCTATTGC TTTG GCTATGGCTCAGGGGGAAAAT TAAAGGC  
GCATTATCGCGTATTAGAGAGATCCATCCTCTTGCATTGTTACAAGCTCTTGCAGAAGATCCTGC TTTAA  
TTGCTGGAAT GAAA AAGATGCAAGGACGGGATTGGGTCTGGAATATC TTTA TCACAGAATTAAG CAAAGT  
TT TTTT CCAAGCAGCATC TTTA GGGGC TTTT CAGCGTTGCAGACGTTGCCCGTTTCGCGTCGACCTTAGGA  
TTAGACTCGGGGACCGTTACCTCAATTGTTGATGGG GAAA AGGTGGGCTGAGCTGATCGATGTCGTGATTC  
AGAACCCTGCTATA TAAA AGGCCATTC TAAAGGCCCCCTTCCCCCGGATAGGA GAAA GGGGGCT TTTG TAT  
TTTTCGCTTATTTG CCTCCGAAGCGGGT GAAA GCATAAGAGTAGTAGGACAATGTTACAGTT TTTAAAGC  
AAATCAATCACTT TTTA ACTTCTT TTTG TGTATTCCC TTTG ATT C TTTG TTTG GGAGGGATACTA ACTTG  
GAAA TTACGAGGGCTACAG TTTA CTT TTTA AGGAATGAGCT TTTT CTTGATGCTGAATAATCAACAGGAA  
CAAGCTGGTGCAGAAGGAGAGGGGGTCTCGCGCTATGAAGCTGTAGCAGGTATGTTAGCAGGGAAC TTTG  
GTACAGGGAATATTGCAGGGATGGCGATTGCTGTCGCTAGTGGAGGCCCTGGGGCATTACT TTTG GATATG  
GATCGTCACTCTT TTTG CTGCAATAGTCCAGTATGCAGGCGC TTTT CTTGGATGTAAGTACCGCCAGTTC  
CAAA AGGAATCCCAGGAGTATATCGGAGGACCGATAGCTTGCCTAGGATATAAAAATGGGCAGCCGATTCT  
TGGCTGTTGCCT TTTG TGTGCTAGCTTGATCACAGCAT TTTT TGCAGGGAATTTA GTTCAGGTTAACAG  
CATTATCTCTCT TTTG TGTGATGGGGTCTCAGCGAAGATCGCAGTAGGGATACTGCTCGCGCTCTCTGTT  
TACCCTAT TTTAGCTGGCG GAAA TACTCGAGTTCTCCGCTTCTCTGC TAAA GCGATTCC TTTT C TAGCAG  
GATTCTAT TTTT CTTTCTCCGTTATAGT TTTG GCTATGCATTGTGA TAAA ATTCTTCCCTGCT TTTG CAGCT  
CGT TTTT CTTCTGCT TTTA GGTGTCAAGGCTGGGATAGCCGGGGTGGGGGCTATACATTAGGACAGGTA  
ATCTCTACAGGAT TAAA CCGTGTCTATTATGGCTACAGACGGTGGAAAGCGGAATGG TTTT CATTCTGCAAT  
CTAATTC TAAA AGCACGAATCCTGTGACAGACGGATTAGTCACTCTTACCTCCGTTATCGTTGCGGT  
CGTATGCTCTATTACGATGATGGTCTTCTTGTGACAGGAGCCTATGATTCTGGAGAGTTAGGGGT TTTG  
ATGGTTATGAATGC TTTCAAA TCTTCGTTAGGCATGTTGGGCGGAAGTGTGTTCTTATATCCATGATCT  
TG TTTG GGTATACTACAGCTCTGTCTATGG TTTG CTTGCGCA GAAA AAAG TTTA GAATATATGATCCCAGG  
GAAGCGCGTAACCTATTGTTGAAGGCTATTTA TATCGCGATAATCCCATGGGTGGTGTCTTAGGAATG  
CAG TTTA TCTGGGCGCTATCCGATCTAGGTT TTTG CGGGATGGTTATT TTTA ATTCCATCAG TTTG ATCG  
CCTTGTTCAGAGAAGTAATTGCCACTCGGTATGAGGTAGCCCTTCTCCG TAAA GAAGCGCAAGCCCAGTC  
TGATCCACTACGACAGTAGTACAAGAATAGGGCCACGC TTTA CAGAGCATGGCCC TAAA TACAGGAGACC  
TCAATTATGCAACTCACCTACAAGCTT TTTT TTACGGCCGTCCGATTCC TAAA AAGTATTTCGTGTCAGG  
GCGTTGGGATCTCCCCACCGCTGTCTT TTTT TGATGTCCCTAGAGAGGC TAAA AGTCTTGTCTTATTGT  
TGAAGATCCAGATGTTCCCTCCTAGTGTTCGAGAGGATGGGTTGTGGATACACTGGATAGTGTATAATCTT  
TCGCCTGTAGTCTCTAATCTTGCAGAAGGAGCA CAAA ATT TTTG CTGTCCAAGGGT TAAA TACTGCTGGAG  
AAA TAGGATACTGCCCTCCTTGCCCTCCAGATGCGAAGCATCGCTATTACT TTTA TGCTTATGCGCTCGA  
TGTTGTGC TTTT CGATGAAGAAGGAGTGAC CAAA GAACAGCTGTTAGAAGCTATGGACGGACATATCATA  
GCTACGGCAGAGCTGATGGGCACATAT GAAAAAGAC TAAATCAGAGATTATTCTTCTTGGGGAACGAATT  
CCTCTCGCTTTTAA CGGTGCTTCCAATACAACGGACCATAGTGATAGCAGAGCTCTTCCCCAGGAAGAAT  
GTC TTTG ATTGCCCGAATGATAATATGGAATATCCCGT TTTCAAA GGCCCCGATCGCTTCTAGATTAGGG  
TTGTCACCTGTGATTAA TAAA CCGAGTCA CATTTC CTTGCATCCCCTATCAATAGT GAAA TAGCGGAACG  
AATAGCGGGGGACCGGGTAGCG GAAA CAGTAATCGT TTTT CATCTAGC CAAA GAGCCTGTCTTCGACG CAA  
AATCCCCTGTATATTCTCCGATGTAGCTCCATGCCGGGATGGATTACAGAG CAAA GACTCCATATCCTACA  
TAGGAATTAATCCAACAGATGGCCACTGGAGGATTT TTTG GAGCGCGGAGATGTTGCTTATGGAGCTGCC

CTAGCCA**TTTG**GCTAGAGAG**GAAA**CGGC**TAAA**CGTT**TTTC**TTCTCGATAACATAATCGTTGAATGCGTTG  
**TTTG**ACCGCAGCAT**TTTG**GAATTGTAATTCAGGAA**GAAAT**GAGAAC**CG****CAAAA**AGTTGTTCAACCC**TT**CGT  
ACGGGATAGGGAATGGCTGAGTCAATCCCTCCGTGTAACGAGAGATA**CAAA**GTGTCTTGAGTAGAGTTAG  
TGGTCATACAAGGCTCGGAGCA**GAAA****GAAA**ATAGGATCTGTAATGCCAGAAC**TTTG**GAGCAATTACGGGA  
TGAACATCTGTGATCTCTGAATGGCAGACGTCAC**TG**ATT**CAAA**GCTTGCTCTGCCGATTACATTCGA  
G**GAAA**GATGTGCAAGA**TAAA**TCTT**TTTG**ATTTCGAGGAGTGAGAACGCGTTGAAGTAGAGCGCCGCACTC  
CGCATTCGAGATATGGCCTTGCTTGCTGAGAATGCGTTG**TTTG**CAGCTCTCTGGTCTGAGGATCGGAGA  
ACCA**TTTC**CGGATCATGGTTGGATTCTATGAGTAGGTAGTCGCAATCACAGAGAAGGTGTGTAATCCAAG  
AGGTGACCCATCC**TAAA**TCCGTG**CAAA**AACCGAG**TTTC**ATACCAGAATATT**GAAA**GAT**TAAA**CCCTACGGG  
ATCCACTGCATCATGCGGAACAT**TAAA**CG**TTTG**CACGCGGAGATCTTC**TAAA****GAAA**AACGATGCCAGTT  
G**TAAA**GAT**TTTAAA**TGTCGGACACAGATCT**TAAA**AGTTGCCGTAAGCTGCGCGCTG**TTTC**TATGTTACATA  
TAATGGGGTTCTATAGGT**TTTAA****TAAA**ACTACGAAGCCCTGCAATGTGATCCGAGTGTTCATGGGTAAC  
**AAA**AATCCCTTGAATATCTTCAGGGTGAATGCCATAGAATGTAAGGCCTCGGTAACGGCTTG**TTTA**CTA  
ATCCCAAGATCTATTAGTA**TTTA**CATGACCTTGTTC**TAAA**TAAGCACAGTTCC**TTTG**GAACCAGAGG  
CTATAGG**GAAA**AAACCTTCCATGGATTAATCGTCTGAT**TTTG**GATAATTGGACTAGTA**TTTG**ACGCGG**TTT**  
**AG**CTCCCTCTGAGGGCCCCACGATTCTAGCTTCCCTCTAACTGGTCAATGATGCTAGCCGCTCTAGCGTAA  
CCAAT**TTTG**AGT**TTTC****TTTG**GAG**GAAA**GTTGTGCGAGGCA**TTTC**CTGTCTG**TAAA**ACAAGAGT**TTTAG**CTT  
GGT**TAAA**TAATGGATC**TAAA**TCTTCAGGATCCATAGAACCTGGATCGTCATAGGTAT**TAAA**AGAAGGGAT  
CACATA**TTTG**CATGGGAATCTTGAACA**TAAA**TC**TTTA**ATGAC**TTTG**TTGATGTGTCATCG**CAAA**TATAG  
GCGCCTTGAACACGAACAGGCG**CAAA**AGATCCTGG**GAAA**ACTACTAGCATATCCCCATTCCCCATCAAGT  
**TTTC**GGCTCCGGGCTCATCAATGATA**TTTG**GCTATTCAC**TTTG**TTGGCAAC**TTTAA**AGGCGATTGAGA  
AGGGAAG**TTTG****TTTG**ATTAATCCTGTGATCACATCTCGAGAAGGGCGTTGTGTTGCTAAGATTAGGTGG  
ATTCC**TAC**AGCTCTAGCCATCTGAGCTAAGCGTACAATAGGCG**TTTC**GATATCATGAGAGGA**GAAA**GAA  
G**TAAA**TCAG**GAAA**GCTCGTCAATGATGCCAACA**TAAA**CGGCATTT**TTTC**TGGGATCTCT**TTTA**TCGTACGA  
AGCTTCGATATCCACATTGCGAGTTCGAGAAT**TAAA**GGATTGGATG**TTTC**GTAGCC**TAAA**AATCGAAGA  
A**TTTC**ATAACGTAGTTCC**TTTC**TCGAACAAGC**CAAA**T**TAAA**CGCCTATGGGCTTC**TTTA**GATTCTGTGA  
TAACAGGAGTTAGCATATGAGGGAGTTGCGAGTATCCTGTTAACTCTAC**TTTC**TTAGGATCCACGATTAC  
GAGT**TTTAT**GTCTGTAGGGGGAGAAGTCATAATAAGAGACATAACAATCGTGT**TAA**TGCAGACAG**TTTC**  
CCAGATCCAGTGGTTCC**TG**CAATAAT**TAAA**TGGGGCATGGTTGC**CAAA**TCTGT**CAAA**AGTTATCGCCAT  
TAGCT**TTTTC**CCCCGAGAAGAAGAGGAACCTGGAGTCTGTTGTGTTCTT**TTTG**GTAATCTTCTAA**TAAA**TC  
TCGGAAGTTAACGGGCTGAGGATCTGGATTGGGGA**TTTC**CAATTCCTACCGCAGC**TTTC**CCAGGGATAGGG  
GCGATGATGCGGATGCTAGAAGCTTGCAAGTTCAATGCAATATCAT**TTTCTAAA**GC**TTTG**ATTT**TTTG**TA  
C**TTTG**ACTCCAGTGTGGGGAGGACTT**CAAA**GGCGGCAAGGGTGGGCCCCGA**CAAA**TGTTCCCAATAGC  
AGCTTCTATTC**CAAA**GCTAGCCAATG**TTTG**CTG**TAAA**ATAGCAGC**TTTC**TTTT**TTTA**ATTCTTCCAAGAGA  
GATCTGGGCGGCGCACATTCCGCTTACTCAAGAGATGGTATTGTGGTAAGTCCGGGGCGTCTCCTGCTA  
GTA**CAAA**TGGGGATGGGGTAGG**TAAA**GGCTTGTAAGATG**TTTG**TGCAGGAGCTGAAGCCGAGT**TTTC**CGG  
**CAAA**AGATTAGGAAGATCAGTTCTT**TTTG**AGGCGATAATGTTCTT**TTTG**TGCGGATCGGTGGGGTGAGA  
**AAA**ATGGTGCGGTTCACAGAGGAGTCATCGTGTAGATC**TTTAT****TTTC**CAGAGGAAGC**GAAAT**CACCGGGG  
TTGGAAG**TTTG**AGCA**TTTC**CTT**TTTA**GCAACAGAAGGCGAAGATGGAACGCGAAGAGAGGGTTCCGGGGAC  
ATAAGACTTATTGTTAACAAGATTT**TTTAAA**AGCT**TTTG**CAGGCGTTCCAACATGCG**TAAA**A**TTTG**TTT  
**TTGA****GAAA**TT**TTTA**GGAGATCGTCTAGGAGAGCTTTTTTT**TTTA**ACA**CAAA**AGAT**TTTA**GGGATAAGATA**AAA**  
AGATCGCGCATAGCAATATGGCCA**GAA**AGATTAATCCTGTTCCCACTGCACCAATTAACAGT**TTTAA**AGA  
**AAA**AGAA**TTTC**CATCGTACAGTAAG**TAAA**ACGGAATGCCCCCTAGGTACGCT**TTTA**GGAGGTTGAAGATCC  
ATGACAACCATGGGCACTCTGTAGC**TAAA**AACTGTGGAAGGT**TTTG**AGCTGG**GAA**TCATAGACAATA  
ATACTGCGCA**CAAA**CCGGAATTGCGC**CAAA**AGCTGCTGCT**TTTCTAAA**AGC**TAAA**GGAGCTGGGGTTCT  
CTTCATA**TTTAGAAA****GAA**AGCCATC**CAAA**AT**TTA**GGGGAT**TAAA**AAGGCAGCGACAC**CAAA**GTTATAT  
AGCAAGAAGGAGCTGAGAGACCAGCCGAG**TAAA**CCATCCAGT**TTTG**TGTGTAAGGTTGATTATGTT**GGA**  
**AA**CTCCATAGACTTAATCCAG**GAAA**CAGGCTAGGGCTAGATACACGCATGT**TTTA**ACAG**CAAA**GACTGT  
**TTG**TGG**GAAA**G**GAAA**CGCTTGC**TTTC**TTCCGTTCT**TTTC**CCATAGTTCCCTCTCTTATCTAACTGAT  
AAGGACTCTTAACA**GAAA**TAGCGCTTATATGGAGGTGTTAGCCTATCATTGCGGAAGCTCTCAACGATCC  
TAGCACTCCAACGCACATGTGTAGCTTGTATAACAG**GAAAA****TAAA**AGAATCGAAGTAGTCTT**TTTAGG**  
**AAA**CTA**TAAA**GAAGGGCGAACGACGGGGTTGCAACCCGCGACCTTCGGAACCACAATCCGACGCTCTAAC  
CAACTGAGCTACGTTCGCCATGGT**GAAA**CTCCCAACTAGCAGAGCGTGCAGGCGCTCTACGTTGGG**GAA**

AGAGAAGTATAATGAAGAGATTGTTTTTATGGAAGATCAAGGTGAAATAAATCTAAAGCGGTGTTTTGA  
AAAAGGAAGCGAAGATGCAAAAAAAAAAGAAATTCGACAAAAAATCGAAGAGAGGAAGGGTAGGATGAGC  
AAAAAAAAAAAAAGAGAGGAAAATTTTGTTTTATAAAAAAGGGTTGAGGATAGTGTGTGAGGGGATAA  
ATTGAGAGGTTAAGAAAAGGGTTTTTGGGGAGTTGATAAAAAATAGGTGCAATAAATAGGGGGTAG  
CATAAGATGTAGCTTTCCTTCGAACGAAGGTTGAAGGAAGGCCTCTTACGTGGATGAGAGGGCGCGACAG  
AGTGGAAGGCTGAGAGGCTGGAAGCTTTCCTTAACAATGCAAAATGAGATAGAATGCAGGCCAGTATAGAT  
GCTTGTGAGGATTTCTTAAGAGATTAAGGAACCCGTTAAATAATCAAAATGATATATTTTCTGAGAAATTT  
GATCTTGGTTTTCAGATTGAACGCTGGCGGCTGGATGAGGCATGCAAGTCAACGGAGCAATTGTTTCGGC  
AATTGTTTAAAGTGGCGGAAGGGTTAGTAATGCATAGATAATTTGTCCTTAACTTGGGAATAACGGTTGAA  
ACGGCCGCTAATACCGAATGTGGCGATAATTTGGGCATCCGAGTAACGTAAAAAGAGGGGATCTTAGGACC  
TTTCGGTTAAGGGAGAGTCTATGTGATATCAGCTAGTTGGTGGGGTAAAGGCCCTACCAAGGCTATGACGT  
CTAGGCCGATTGAGAGATTGGCCGCCAACACTGGGACTGAGACACTGCCAGACTCCTACGGGAGGCTGC  
AGTCGAGAATCTTTCGCAATGGACGGAAGTCTGACGAAGCGACGCCGCGTGTGTGATGAAGGCTCTAGGG  
TTGTAAAGCACTTTCGCTTGGGAATAAGAGAAGGCGTTAATACCCGCTGGAATTTGAGCGTACCAGGTAA  
AGAAGCACCGGCTAATCCGTGCCAGCAGCTGCGGTAATACGGAGGGTGCTAGCGTTAATCGGAATTTATT  
GGGCGTAAAGGGCGTGTAGGCGGAAAGGTAAGTTAGTTGTCAAAATCGGGGCTCAACCCCGAGTCGGCA  
TCTAATACTATTTTCTAGAGGGTAGATGGAGAAAAGGGAATTTACAGTGTAGCGGTGAAATGCGTAGAT  
ATGTGGAAGAACACCAGTGGCGAAGGCGCTTTTCATAATTTATACCTGACGCTAAGGCGCAAGGCAAGGG  
GAGCAAAAGGATTAGATACCCTGGTAGTCTTGGCGTAAACGATGCATACTTGTATGTGGATGGTCTCAA  
CCCCATCCGTGTGCGAGCTAACCGGTTAAGTATGCCGCCTGAGGAGTACACTCGCAAGGGTGAACCTCAA  
AAGAATTGACGGGGGCCGCACAAGCAGTGGAGCATGTGGTTTAATTCGATGCAACGCGAAGGACCTTAC  
CTGGGTTTGACATGTATATGACCGGGCAAAAAATGTCGTTTTCGCAAGGACATATACACAGGTGCTGCA  
TGGCTGTCTCAGCTCGTGCCTGAGGTGTTGGGTTAAGTCCCGCAACGAGCGCAACCCCTTATCGTTAGT  
TGCCAGCACTTAGGGTGGGAACCTAACGAGACTGCCTGGGTTAACAGGAGGAAGGCGAGGATGACGTC  
AAGTCAGCATGGCCCTTATGCCAGGGCGACACACGTGCTACAATGGCCAGTACAGAAGGTAGCAAGATC  
GTGAGATGGAGCAAACTCTCAAAAGCTGGCCCCAGTTCGGATTGTAGTCTGCAACTCGACTACATGAAGTC  
GGAATTGCTAGTAATGGCGTGTGAGCCATAACGCCGTGAATACGTTCCCGGGCCTTGTACACACCGCCCC  
TCACATCATGGGAGTTGGTTTTCCTTAAGTCGTTGACTCAACCCGCAAGGGAGAGAGGGCGCCCAAGGTG  
AGGCTGATGACTAGGATGAAGTCGTAACAAGGTAGCCCTACCGGAAGGTGGGGCTGGATCACCTCCTTTT  
AAGGATAAGGAAGAAGCCTGAGAAGTTTCTGACTAGGTTGGGCAAGCATTATATGTAAGAGCAAGCAT  
TCTATTTTCATTTGTGTTGTTAAGAGTAGCGTGGTGGGACGAGACATATAGTTTGATCAAGTATGTTA  
TTGTAAAGAAAATAATCATGGTAACAAGTATATTTTCACGCATAATAATAGACGTTTAAAGAGTATTTGCTCT  
TTAGGTGAAGTGTGTCATGGATCTATAAAAAATTACAGACCAAGTTAATAAGAGCTATTGGTGGATGCT  
TGGCATTGACAGGCGAAGAAGGACGCAATACCTGCGAAAAGCTCCGGCGAGCTGGTGATAAGCAAAAGAC  
CCGGAGGTATCCGAATGGGGAAAACCCGGTAGAGTAATAGACTACCATTGCATGCTGAATACATAGGTATG  
CAAAAGCAGACCTGCCGAACGAAAATCTTAGTAAGCAGAGGAAAAGAAATCGAAGAGATTCCTGTGT  
AGCGGCGAGCGAAAAGGGAATAGCCTAAACCGAGCTGATAAGGCTCGGGGTTGTAGGATTGAGGATAAAG  
GATCAGGACTCCTAGTTGAACACATCTGAAAAGATGGATGATACAGGGTGATAGTCCCGTAGACGAAAAGG  
AGAAGAAAGACCGACCTCAACACCTGAGTAGGACTAGACACGTGAAACCTAGTCTGAATCTGGGGAGACCA  
CTCTCAAGGCTAAAATACTAGTCAATGACCGATAGTGAACCAGTACTGTGAAGGAAAGGCAAAAGAACC  
CTTGTTAAGGGAGTGAATAGAACCTGAAACAGTAGCTTACAAGCGGTCGGAGACCAATGGCCGTAAG  
GGTCAAGGTTGACGGCGTGCCTTTTGCATGATGAGCCAGGGAGTTAAGCTAAACGGCGAGGTTAAGGGAT  
ATACATTCGGAGCCGGAGCGAAAAGCAGTTTAAAAGAGCGAAGAGTCTGTTGGTTTAGACACGAAACC  
AAGTGAGCTATTTATGACCAGGTTGAAGCATGGGTAAACTATGTGGAGGACCGAAGTACTAGTCTGTTGA  
AAAAGGTTTGATGAGTTGTGAATAGGGGTGAAAGGCCAATCAAACTTGGAGATATCTTGTCTCTCCGA  
AATAACTTTAGGGTTAGCCTCGGATAATAAGCTTTTGGGGTAGAGCACTGAATCTAGCGGGGGCCTAC  
CGGCTTACCAACGAAAATCAAACTCCGAATACCAGAAGCGAGTCCGGGAGATAGACAGCGGGGGCTAAGC  
TTCGTTGTGCGAGAGGGGAACAGCCAGACCAGCCGATTAAGGTCCCTAATTTTATGCTAAGTGGGTAAGGA  
AGTGATGATTGCAAGACAGTTGGAATGTTGGCTTAGAGGCAGCAATCAATTTAAAAGAGTGCCTAACAGCTC  
ACCAATCGAGAATCATGCGCCGATAATAAAAGGACTAAGCAATAAACCGACATCGCGGGTGTGTGCGAT  
AAGACACGCGGTAGGAGAGCGTAGTATCAGCAGAGAAGGTGTACCAGGAGGAGGGCTGGAGCGGATACT  
AGTGAAGATCCATGGCATAAGTAACGATAAAAGGGAGTGAATAATCTCCCTCGCCGTAAGCCCAAGGTTTC  
AGGGTCAAGCTCGTCTTCCCTGGGTTAGTCGGCCCCAAGTTGAGGCGTAACTGCGTAGACGATGGAGCA

GCAGGT TAAATATTCCTGCACCACC TAAA ACTATAGCGAAGGAATGACGGAGTAAGTTAAGCACGCGGAC  
GATTGGAAGAGTCCGTAGAGCGATGAGAACGGT TAGTAGG CAAA TCCGCTAACATAAGATCAGGTCGCGA  
TCAAGGGGAATCTTCGGAGGAACCGATGGTGTGGAGCGAGGC TTTC AAGAAA TAA TTTC TAGCTGTTGAT  
GGTGACCGTAC CAAA ACCGACACAGGTGGGCGAGATGAATATTCTAAGGCGCGGAGATAAC TTTC GTTA  
AGGAACTCGG CAAA TTATCCCCGTA ACTTCGGAATAAGGGGAGCCT TTTA GGGTGACTATGGAACGATAG  
GAGCCCCGGGGGGCCG CAGA GAAA TGGCCAGGCGACTG TTTA G CAAA AACACAGCACTATG CAAA CCTC  
TAAGGGGAAGTATATGGTGTGACGCC TGCCAATGC CAAA AGGT TAAA GGGATATGTCAGCTG TAAA GCG  
AAGCAT TGAACCTAAGCCCTGGTGAATGGCCCGTA ACTATAACGGTGCTAAGGTAGC GAAA TTCCTTG  
TCGGGTAAGTTCCGACCTGCACGAATGGTGTAAACGATCTGGGCACTGTCTCAAC GAAA GACTCGGT GAAA  
TTGTAGTAGCAGTGAAGATGCTG TTTA CCCGC GAAA GGAC GAAA AGACCCCGTGAACC TTTA CTGTACTT  
TGGTATTGGTT TTTG G TTTG TTATGTGTAGGATAGCCAGGAGACTAAGAACACTCTTCTTCAGGAGAGTG  
GGAGTCAACGTT GAAA TACTGGTCTTAAACAAGCTGGGAATCTAACATTATTCCATGAATCTGGAAGATGG  
ACATTGCCAGACGGGCAGT TTTA CTGGGGCGGTATCCTCC TAAA AAGTAACGGAGGAGCC CAAA GC'TTAT  
TTT CATCGTGGTTGGCAATCACGAGTAGAGCG TAAA GGTATAAGATAGGTTGACTGCAAGACCAACAAGTC  
GAGCAGAGAC GAAA GTCGGGCTTAGTGATCCGGCGGTG GAAA GTGGAATCGCCGTCGCTTAACGGATAAA  
AGGTACTCCGGGGATAACAGGCTGATCGCCACCAAGAGTTCATATCGACGTGGCGG TTTG GCACCTCGAT  
GTCGGCTCATCGCATCTGGGGCTGGAGAAGGTCCCAAGGG TTTG GCTGTTCCGCAAT TAAA GCGGTACG  
CGAGCTGGGTT CAAA ACGTCGTGAGACAG TTTG GTCTCTATCCTTCGTGGGCGCAGGATACTTGAGAGGA  
GCTGTTCC TAGTACGAGAGGACCGGAATGGACGAACCAATGGTGTATCGGTTGT TTTG CCAAGAGCATAG  
CCGAGTAGCTACGTTCCG GAAA GGATAAGCATT GAAA GCATC TAAA TGCCAAGCCTCCCTCAAGATAAGGT  
ATCCCAATGAGACTCCATGTAGACTACGTGGTTGATAGGTTGGAGGTGTAAGCACAGTAATGTGTT CAGC  
TAACCAATACTAATAAGTC CAAA GACTTGGTCTT TTTA TGATTGGAAGAGCC GAAA GG CAAA GACAATAA  
GAAA AAGAGTAGAGAGTGC AAGTGC GTAGAAGACAAGCT TTTA AGCGTCTATTAGTATACGTGAGAAA CG  
ATACCAGGATTAGCTTGGTGATAATAGAGAGAGG GAAA CACCTGACACCATTCCGA ACTCAGAAGTTAAG  
CCTCTGATCGCTGATGGTACTATACACGAGAGTATGGGAGAGTAGGTCGTCGCCAAGCATT TTTA TTATAT  
AAGATCTTAGTCATAGAC TAAA AAGGAGAAGGGGGTAGCCGCTAACGCAGCTACCCCT TTTCT TTTCTC  
TAAA ATACCTTCTCTCTTCTTCTTCTGCTGTAATCCTAGT CAAA TTATCTCTAATCTCTACTATCTTCTTC  
CTTATCC TTTA GAGCAT TTTC AG TTTAT CAAA ATATTTCTCTTTTCTACCC TTTA AGACTTTA GAATAC  
CATGCTCCTTAGAATGGACAGAGGGATCCTGGGATCATAACGGAA TTTCAAACAGAGGCCTGCTGGAAA  
GAT CAAA AGCATGTATGTAGGCTGCAGATGACTATACATGCAAGAGAATCGAGAAA G TTTG TCATTAACA  
AGAAG TTTAGCTCTT TTTG AAA GCCTTGCCACAGTCTGTATGCTGATAGCAAGGGCTTATTAATTAACGC  
ATGAGAAA GAAA TTAGAAGCTATGAAGA ACTGTTGTTAGAGGCTCTTCTTGGAGTGATGGAA GAAA GTTA  
GCACCCTTGTAGCAGGTTAACTTCC GAAATCATC TAAA ACAATAGAAGAGCGCTCAACACCATAATTATC  
TAACACGGTTAAGATGCTACTATTATGCAGAGCAGGACCG CAAA CGTAATATAGATAATCTTCTGGATTG  
GGGAGATGACTCAGTTGTCCAAGTTC GAAA AGC TTTAAA CAAGAAA TTGGTT TTTA TAGGATCATCTTAT  
CCCATCCTTGGTCT TAAA TCTTCCCTG TAAA GGGCTGAGAGAGAACCAAGTGATAGTGGAAGTTGGGGAATC  
TTTC TCTAACTTCTCATACTCTTCTTGGTAGATAT TTTCTTTA AGAGAACGTGCTCCATACCA CAAA GTC  
AGTCTCTGT CAGAATG TTTA TTCAACAG TAAA TCAAGAATATGGCTTCTTC CAAA AGAAGATCCAGCAC  
CTCCTATTAGGAAGATAACAGGACGGTGTCTCT TTT CAT GAAA GACTCCCCATAAGGCCCGGATACCAT  
TACCTTATCACC GGG TTT CAGAGAGAATATATACGAAGAGCAGACTCCCCAAGGGATGGTCGGGTCGGGA  
GCTTGATCCA CAAA AGAAGGGGTGCGGATCCGGACATTGAATTTG AT CAAA GGAAGTTCTGCTGGATAAG  
AAGCTAGGGAATACGC TTTA TTTCG CAGAGTCCGGTATC TAAA GATAGATTATCAATAACTTGGT CGAATAG  
ATG GAAA GTCTCCAATCACTATAGTATTGGGGATCCATAGTCTGCTTCCAGTCCGAAGTATTGGT TTTA  
TAAGGAGGAACGGTAA TTTG TAGATAGCCTCCAGG TTTAAA AGGAATAGGGCGCGAAGGATCTACAGAAA  
GAACAAGTTCTTTG ATAAA GGTAGCAACATTCTCG TTTG ATACAACAGTACCCTCCCAAGAAGAAGCATT  
GAAA TAACGGTCTTCTACTTCTAAGCAGAGATCGTGTGTGACT TTTG G TTTG GCAG GAAA GTCTCCATCCT  
TGTTCTAATTGCTGCTTA GAAA AGGTAGAACGATCTG TTTCTAATGGTTCATCAGCATTCTTTG TAATGC  
GGAC TTTG CATTGCTTACAAGCAGC TTTCCCTCCACAAGGAGAAGGGATAGCGATTCCTGAATCTAATAA  
GGAAGATAGCAATGT TTTCCCGCTGTCTACAGTCTTAGTGAGGGAATCATCATTATTGATT TTTAGCTTA  
CAAGGATGCAC TTTA ATAAGGAA TTTCTG GAAA GCAGGATAACGGCGACAAGAATAAGGTCTAAA GAAC  
AAA ATGCTGCAGAAGCGA CAAA GATAGAGTACAGGCCT GAAA GCCAAGTCATAATTA TAAAAATCCCTGG  
AA TTTCAACGAGACTGTAGCGTCAAGTTATAGGTTACTCTATAAAA AAATCAACGGAGTTTT TTTAAA GTTT  
TATTACAAGGAAG CAAA GCCCAAGGACCTGGGC TTTG CT GAAA GGAGCTCGTT TTTATTTCTCAGCTTTA

AGAA TTTCTGAAA TAGCAGT TTTA AGAA TTTCAAT TTTCCCCGAGGCAATGTTGAGAATGACTGTGTGTT  
CTCGGAT TTTCCGCAATGGTGCCAACGATTCCCATAGCAGTTAC TTTATCTCCAACAGCTAACTCGCTT T  
TC TTT TTTCCATAGCTTGACGACGTT TTTG TTTCTGGACGCCACAAGA TAAAATA GAAA AAGACGATAGCA  
ATTCTAACATGACTGCAGGTTGTC CAAACGTTGCGGTTGAGGAGAATCCGTATCAG CAAA TAGAGCTG  
GGCAACATCC TAAA AAGAACAGGATAC TAAAAAACAGACGCGAGTACATCGAGGTGCCT TTTA TTAGGGT  
TAAA AAGGATAGGTAAACACAGGAAGATAGGGGGATCAATCCT TTTCCAGAAGGAACAGCATTAGGAATA  
AGGC TTTCTTGT TTTAAGAAAGCC TTTCTAAGAGCACAATAT TTTCCAAATGATTAGTATGCG GAAA CTG  
ATCAATAGGCTGCATGTGCCGTAGCTGATATCCTTGCTCTACAAGAACAGAGCATTCCTGGAT TTTGTGTA  
AGAGGATTGCAGGAGACATACACAATTTT TTTAAGGAGCCATGCG TAAAAGGTAT TTTAAGGC TTTAT TTT  
GCATGCCGCAACGAGGAGGATCGATGACTACAATATCTGGGAAGGAAGGT TTTCCATTCCG TTTGCAAAA  
TTGT TTTGCATCTTC CAAA AACTTCCATATCCACGGAATTAAGCTGAATAT TTTCTTGTGCTGAAGCA  
ACAGCATCCGGGACTAGTTCGACTCCAATAATTTTT TTTACGTAAGGAGCCAG TAAA ATGCCGATAGTCC  
CAGCTCCGCAATACAGATCTAAGAGAGTCTCTTCTCCGCAAGGATCAATGAATTC TTTGATAG TTTGAAT  
GATTT TTTCTGCTTGGAGGCT TTTG TGGCTG GAAA AAGCTTCTTGGACGGATATGGAAGAGACTAGAACGG  
CCATCTATCGATAATTGTTGTTT GAG GAAAGGAGCTCCGTATAGATGAGTTGTCC GAAA GGGTTGTGGAG  
AGTTCCGTGCGGAGAGTT TTTCTTCCAGAAA ATCGAAGTAATCGGTAGTCCAGAATCTAA TAAA GATTG  
TTGCCATTCTTGGATTATATTCAGAGGTACAGCGAATTCCTTCTCTCCTGATGTAGTCAGAATAATCATA  
AAATCATTAGAGATATTGCC TACCCGGACTGTAATAGTGCACAAGGAGCC TTTATTTAATGGTGGATAGT  
ACGCAGACAGGT CAGGATGGGCAGTCCACCACGAGCGAGTGATATTAAGGATATCCATGGCACGCTCATC  
AATCAT TAAA CATTCGTAATTGGGATTCCTTT TTTAGGTT TTTGATGGAGAAAATAAA ACC TAAA GTTTTT  
TC TCCATCAACCG TTTGGTAAAAA GAAA ATTCCAT TTTATTTCTTCCGCGAAGAAGAGGAGAACAAGGAA  
TTACAGGGAGAATAT TTTGGGATGGGATAAGAGGTG CAAATAAAA TTATGGAGCGCAAGCTCT TTTG TTTT  
TAAA GAGGATGCATATTCATTTGAGGAGATGAACAGCCTCCACAGACGCC AAAATG TTTA CAGTTACGA  
TAACAGGAGAGCAACTTGAATCC TAAAGAAA GT GAAA GGGTT TTTCTCTC CAAA GGAGGTGTGAGGTTGTAC  
TTTTATTTG CAAGGACTTGCC TTTGCGAGAACG GAAA GGATAACAAAAAAGAGAAGGGATCAATGAGA  
AGGG GAAAGAGGGCCCTGTTGATAAA AGTGCCCTCTA TAAAAAAGA GAAAGCGCTAAA ATATTATTTTTT  
TGTTGAGCGAGTTTT TTTCTGCTGT TTTAACT TTTG TTTTAGGGGCGGCTTTTT TTTGTTGGTTTG ACC TTT  
GCT TTTAGTAGCACAGTTCTTTTTG TACAAGCTTT TTTAGCTACTGTT TTTGTAGCGCAACAGGCTTCT  
TAGCAGCAGCT TTTAGCTTT TTTAGCAGCGCT TTTGCTTTTTTTTC ATTAAGCCCATTT TTTCTGCT TTTAAT  
GGACTC TTTACGATATACCTTCGCGTCT TTTCTAA TTTGATAGATTCTGTACGAACTC TTTGTGCTGCG  
GCT TTTATTTCTTT TTTCTGCTTTAAG CAAATTTTG TTTGATACT TTTCCAAACAAGTCAGTCATTTTTTTG  
CCGTATCT TTTAGCGCCATGAAAAAATATCCTCTAGTTGTTGTT TTTAACTATTTT TTTCCAGT TTTAATT  
TTTAATTAGTTTGT TTTGTT CAAA TTCATGCAACCAT TTTCTAGAATCTAGGTAAGGATCC TAAAGCAGCT  
TTATTTGACATCTCCTTGTACCGCTCTG TTTATCAATAGGTTATT TTTCTCTGTTAATAGAAAAATTTT  
TTATAAAACTATGTGCTGCATAGGGTCTGAATAGGG TTTCT TTTAATAGAAA GCGCTGAACCTTG TTTAG  
AAA GAAAGAAA GGAGCTTGTCTCTTGTGTTAGAAGATTCCTCATAGATCT TTTCCAGAATGGATTATTAAG  
ATGCCCTCATGATGAGAAGTC TTTGCAGTCTTC TTTGAAGAGGAA TAAACAAGTGTT TTTCCATATGAAT  
ATTTA TAGATTCATCTCTGGAAGCTGTT CATGG TTTCTGATAGGTTGGGGGATATGCTTCGGAGCTGACG  
TGCCAC TTTCT TTTGGGCACCAATGCGCAGACGTT CGCAAGGCGATGCAAGAGGGCAAGCCGCT TTTGCC  
TATT TTTGATGCG TTTA TTCGTGATATCGTGAATGACAGCTCATC TTTATCTGA GAAA GATTGG GAAACA  
GCAACATGGTTAA TTTGTGAATATATACGAGGGAG TTTAAA GCGGGGAGAACAAGAGTTATGCTCGGAGC  
TTGTAAA ACCTCTGT TTTCTTTA GCTGTAATGCCTCCGAGT CAAA AGCTCGTATTAAGCAAGTGTGGCA  
GGTACTCAATCCTCAAGGAGCTTC TTTAAAGGACTTAGTCCG TTTACTG GAAA GTAGCGGATGCTCCTCT  
TCACCGCAAGATCATCTCCTAC TTTCTTTATATAATATGACACTGCATAGCAGTTATGAGAACAA GAAAG  
CAGAGATCCTTT TTTGCAAGAGAA CAAA AAAATTATCAGGACGC TTTACG TTTA TGCGAGGAGTTGCAAGA  
AAATCTGACTTCAGGGC TTTGTT CACCTC TTTCAACGGTATATGAGGTGGAGCAAGCCTTCT TAAA GCGA  
ATCTCCTTAGCCATACGGTGGGAACAAGAGAAGGAGCTGCAAGGGAGCCCCTCTATAGAGTTGCTATTGG  
CCTATTGTAGTGCGGAAGAGAGTTACGCAGAGGCTGTGGAGCAGTTAAT CAAAAAATAGAATTAGGAAG  
CTTAGACCGATCACAAGAAGTCGACGCAAT TTTATTTG CACATGCGTTAAG TAAA CTCCATGGGAAGAG  
ACTCTTGAGAAACACGAACTGGAGGTTCTCATATCAGGAGGACACTATCTCACATCGA TTTA TTC TCAAC  
ATGCTTACT TTTCTGCTTCTCGAACAATAT TTTAAAAAATCT CAAA TACAAGAAA TATCTCGCTTATTAGA  
TTTTGGAAA ACCGTC TTTGTTGAGACCATAA GAAA TATCCAGAATACCTCTTC TTTCTAGGCAAGTAC  
TGGT TTTACTTGCGGGAT TTTCTCTCGTGCAGAAGAGGCTTTTTCTTCTGTAATTCGGTATGCAGATCGAC

TGGGAGTGTCTTTAGCGGAAACTTATGAGTATTTAAGGTGTTAGCTTGTTACAAAGGGCACTATGCTTC  
CGCTAAAGAATTC TTCTTAAAAGCTTACAAGGGGTGGGGGAGAGAGGATGCCGGTATAGGATTGTATCTA  
TTGGCAGTCTTAGAAAAGATCCTATTTATGTGTCAGCAGGTGAGAGAACAGGTGCTTTATCCTTTTCAC  
ATCAGGAATT TTTAAAATGGATGGATAGAAATTTCTTACCTGAGCCAGG GAAA GAAGGCTCTCTTTTTT  
TAAGGTATTGGGAAGCTCGCGTTC TTTATCTGAAGAAGAGT TTTATGGATTACTGC TAAAGGAGATGATT  
AGTCGTCATCATAGAGAGAAGCTCTCTTGCTCTCCTATACAACGGCTAGTGTACGACCAGTTGGATCGAG  
AGATACAACCTTCGGTTGACAGAAA CATTAATT CAAA CAGAAGATCTTCTGGTGAGACGCAAGCTCTCTTT  
ATGGAGAGCTCTATATGAAGGATCG TTTGTATCTTGGGGTCTGCTCATCAGAATCAGACTTTATTTGAG  
AAAAGTAT TTTG CAGTGTT TTTCTGCTCTGTGCGCAGCAGGACCTAGCGCAATACAG CAAATAGCAGAAG  
CTT TTTCTTCAGGAGCCTCTTTATGGCAATCCTCTTTGAGGATGGTGTGGGCAGTTAGTCATACTAGTGA  
AAATCCTATATCGAAGGCATATTCGTTAGGCATATCTGATCGGCCTTGGGGAGATCGACTGTATCTTTTA  
CAGTATTCATTAGAGCAATATCTTTCTGGAGATACAGAATTATTAGAGTATTTAACACAATTC CAGAAT  
TATTCCCGAAGCTCGCC TTTGTTGCC TTTGGTTTA TTA TTTG CAGGCAAGAGGTGAGGGAGATCCAATTG  
AAA GATCGCTTGGTTAA CAAAAGC TTTAGAGACT TTTACGGAAAATTC TTTGTTAG CAAAGGAGAT GAAA  
GCTTGGGCTCC TTTGTATTATTTAATGCGAATGGA TTTAGCAGAAA CTTACCTATA TTTAGGGAATGTGT  
CTAAA TCACAACTCT TTTCTGAAGCGATCCAAGAAGAGTGGGATGCTCCGCACCATCCTTATG TAAAGTT  
GATAGATCCGCCGCACATCCGTGTGTC TTTGGAGATGCGTTGGG TTTCTGGGCTTGCCTCATGTGTATGAA  
GCTATACAAGCAACTGAA CAAAGAAA TGCGTTATTAATCAGCCACATT GAAAAACG TTTCTTTCAAACGC  
GACCAAGACAGGAATATATTGGGAAGATGTTAACATTCACGAGTTCTCTATGCAGAGAATATTAGCAGA  
TGCCTCATGGTAG TAAAGAAGCTATAGC TTTA TAAGCAGACGCTGTAGCGCGGTTGAGACCTGGACCTGC  
AAAATTCTGCCCTACAATT TTTATATTGTGAGGAAG TTTAGATAGAAGGCGTTGGCGGGATTGGA TAAAT  
CCAACATGGTGTGGGGAAGTCCCTCTCGAGGAGAGAATAGTGAG GAAA GCTTGGGGAGGAGTG TAAATTT  
GCAGTACTCAGAAA TAGCTGCTAGTGAGAAA GCATACGCTTCTTCTTGGTGCCATCGACCTTC TAAAAG  
AAGAGAGACTATTGTATTAGGCCGCTCGGGTTGAGGGAACACTTCCGTATTAAA CACGATCCCTAATAAG  
GGAGGCGTATCAGC GAAAAGCATGCCATATCCATGAGGGATAGGGAGGGATGCATGCCATCC TAAAGATA  
CACAAGAGAGATCCCAAGATGAAGTCG TTTGCTTGATAAGCTTGG TTTTCAGGGATCTCTTCTAGACAGGA  
AGGGAGATCGTGCACGGACCCAGCA TAAATGAGCATATCTCCCGTTA TTTCTCCTTGGAGAGAT GAAAGA  
GAAAT TTTCTCCGTTCCCAACTGACGGAT TTTGCTGACGGGTGCA GAAAAATACCAGGTAGCAGGCAATT  
TATCATGCAAAGCCTGGGTTAGCATTC CCACTCCAGACCGCAAGGTAGC TAAATAAGGGCCTGTGCGTTT  
CTCTTTTAGGAAAATCT TTTGAGATAACTACGTAACAACGATCCTGT TTTGAGCTTCTCTTCGCGTTAATTCT  
GGGTAAGCCATCTGTGCGACACAATATATGACTATGCTCTGCACGAATAGCAATGCTAATGGGA TTTAAAA  
GAT TTTCTTCTAAGCTTGGGAAGAACTGTGTCT TTTAAA GAAGGCTTCCACGGAGCTGTCTTG TTTGTAAGG  
ACGCGCAAAGAAA TCCTTAG CAAAAGAGAGAGGGAGAT TTTGTTTGAAAATAGTCCAAGGCGAGACT TTT  
CGGGTTTATTATTATAGTGGATAAA GCGGTT TTTAGCCTCTGGAGAGCTATATAATAGCTCGTCTGCTA  
GGCC TAAAGACTGAATGAGGTGAAGGGTGTGTTGCCATCATGAGC TAAAA CAAA ACC TTTAGGGCCCAT  
ATTGAGG GAAAACCTTGTGTT TTTCTCTGTGACAATTAGCCCTCCAGATCGAGACTCTT TTTCTAGAATA  
GACAACGTCACATGAGGGAATCG TTTGTGTAGCCACCACGCGGCA GAAAGGCCGGCAATACCTGAGCCAA  
CAATGAGAGCATG TTTCTATATAGACTTC GAAAAAAGAGGTT TTTCTACGATGTCTT CAAAAAATAATGG  
T CAAA GGCTGTGGCAATGACCCGTA CAAAAGCTCTCCAAGAGGAGTTACTTG TAAA GAAGAGGAGTCTT  
GCCGAATTAATCCTGCACTCTCCATCCCGCACAGCCGATCATAGCTATCTG CAAA GTATCGAT CAAA GCG  
TTCAT GAAACCGTTGTTGCAACTCCAG TTTAGACAAT GAAAAAGAACACATTAGGGTATGAATCACCCT  
TTGCGGAT TTTATCATCCTGAGAAA GAATCTTGCC TTTACAGTTGCTAGTTTGCTAGCCTGAATAGTCT  
CAGAATATTCACGAAGATCCTTAACAT TTTGTAAA TAGATCCCCGAAT GAAA CTGGTTGCCGATATACC  
AAAACCTAGAAGATCTTCTTCAGGAGGAAGAGAGTACCCTTG GAAA TTACGAATCAACGTTTTGTTCTTA  
AGGGCGATAGTTAGAGGATCATCCGGAAGAGAAA AATGATCTAGACCAATAGCCTGGTAGCCTTCTGGA  
TCAGGGTATGCCGAGATTGGGAA TAAATCGCGAA TTTCTCTTCCATGGAAGGGAGATC TTTAGTGCGCAA  
AGCCT TTTGATGCGGCTTAGCCCAAGGTACATGAGCGAAGGAGAAA AGGGCTAGGCGGTCTGGCCGCATA  
TCTAAGATATGTTCAATGG TTTGT TTTAAA ACTAGACTGTG TTTGTTTAGGGAGACCA TAAATGAGGTCAA  
TATTAATACCTGTGAAT TTTAAGTCTCGGAATAGTTGATAAGCTAAGAGCGATTC TCTCGTAAGATTGGCG  
TCTACGAACAGCTTCTTGAACCTCCCATGGGTATCCTGAATACCCAGACTCACACGAT TAAA ACCTAGG  
TTATGAAGGAATAGAGG TTTATCGGCATCCTCTCTGAGACTTCGAGGATCGAACTCTATGGCAAGTTCTT  
CGATATTGGA TAAAT CAAAAAACGATGGATATGAGTGAA CAAA CGTT CAAA TTGAGCACGCGA TAAACG  
ACTAGGAGTCCCGCCAC CAAAGTGAATTCTAGAGACTGG TTTCTTCCCTCCTAATAACGAGAAA GCTAGG



CGCA T T T C T T G G A T T A A C G T C T C T A T G T A G T G A T C T A C G A T T T T C T G C T T T T C T A T T T T A A A A C A A C A G T A C  
A T C C G C A A T A T A G A C A C A T A G A T T G G C A G A A T G G G A T G T G G A A G T A T A A A G A A A G A G G A T C T T G C T C C T G  
A G C A A G C C T C T C C A A G G C C G T A T A G C C A T A A T C T G A G G A G G A T T C C C A G T C G A C G A T G G T G G G G T A G C T C  
G T A T A G C G A G G A G C T G G T T G A T G C A G C C C T T T T A G G A A G T T G A A A T T G A T G T T A A A C A T G A T A C A A C A G C  
C T G T A C A T T T T C T A T T G G C G T T T G A G G T A A G A T A C C A T G C C C T A A A T T G A A A T A T A A T G C G A T T G C T G T  
T T T A A G G G A G C A A G A T A A G C T T C A A G G T G A G C A A T C A G T G C G T C T T G G G G A A G T A G T A A A A G A G C A G G A T  
C G A A A T T T C C T T G G A T A G A T C C G G G A C T A T G T A T C T G A C G G T A A A C C T C T G G G A G C T C T A C G T G A T A A T C  
G G G A T G T A A G G T A T C T G C T C C A A T C G C A T A T A G A G A C A A A A A T T C T T G G T A A A A G C A T C G G C A G A A C A G A  
C T A A T A G G A G G A T T C C C T G T C T G C T T G A T T T T G A C G G A T T A G C T T G G T A T T G G G A G C A A C T A C G T A T T T T G  
C A A A G A G G T G A G G A G C A G T C G T A A A C T C G A A G A T T C A A A C A A T T G A A T C G C T G C A G C T C C A G C T T G C A C  
C T G C A T C T G G A G A T A A G T A G C G G T C C C T A G A G T G A T T T C A T C C A A T A A A G C T T T A A A T C T G T C G G G A T A T  
T G A T A G A G G A A T G C A A T T G T T T T A G G G T A G T C T C T A G A T G C T C C C C C C T C T A T T A G A T A A C T G G C G A G A G  
T A A A A G G A G A A G C G G C A A A G G C A A T C A A A G G G A C C G T G A G A C G T T T C G T T A G T T G C T G G A T A G C T T C C A G  
T A G A A A T G A G A A T G T T T C T T G A G G A T C T T T T G T G A A A T A A G A G G T T C A T G A G G G G A A T A G C T A A C C T C T  
G G C C A G G A G C A A A T C G A T A A T C G A C A G A A A A C C C T T C T A G A A T A G A G A G A A T A T C A G C A A A G A C A A T A G  
C G G C A T C T A C T C C T A A T A A A G A A G G C C C T A A T A G C G T C G C T T C T A C A A T A G A C T C A G T A T C C A A A A A A A  
A T C T T T C A A A G A A C G G T T T T C T T T T C A G C T C T T G A T A T T G A G G T A T A T A T C G C C C C A C T T G G C G G A G G A A C  
C A T A T T G G C G G A C G T T G T T G A T C T C G A G G G G A G A T G G T T T C A T A A A A C C C G G T C A T A G G C A T C C T C T A C C  
T C T A T T A T T T T G G G G A A A G C C T T T T C T A C A G A C T C T T G G A C T T C T T T T A C T A A A A G T T C C G G T G T C G G T G A  
T A A A G A A T A C G G T A A C G T T T T T T G A A T T T G T T T G T C T T T A T C A T G A T A C T G C T G G A T A T A T A A T G C A T T C  
C C T G T T C C T T T G A T A C T G G A A A G G T G A T A T T C C T G C G C G A T T A A C C G A A T C C G T G C T A G A G C A A A T A A C C  
A G G A A A T A G C T T C T G G A G A A G G T C C A A A C C T A T C C G C A G C T C T T C T T C T A T A G C C T C T A G C T C C T C T T C  
A G A T T C G G C G T T T T C A A T T T T T G A T A G A A C T C G A T G C G C A T A G A A G C A A G A T C T A T A T A G T C T T C A G G G  
A T G C G C G C A T G A T A A G G A A A C T C A A T T T T T A T A T C A T C G T G G A A G A G C A T G G G T T T T T G T T T A T G C T T C A  
G G G C A G C C A C A G C T T T T T T C A G T A A T T T T G C A A T A T A G G T T A A A C C C A A C A G C A C T A A T A T G C C C G G A T T G  
G T C G G T A C C T A A A A T A T T T T C A G C T C C G C G G A T T T T C C A A A T C A T G A A G A G C T A T T T T C A T C C C G C C A C C G  
T A C T C C T G T T T A T T C A A T G C T T C T A G G C G T T T A G A A G T A G G T C C G G A T A A G C G A T C T A A A T G A G G G A C A A  
G A A A T A A C A A T A A G C T T T T C T T A T T C C A T C G T C C A A C A C G G C C T T T C A T T T T G A T A C A A A T C A G C C A T A C C  
G A A T T T T A T C T G C G T G G T C T A T C A A G A T C G T A T T T T G C A T T A G G A A T G T C G A T A C C A T T T T C A A T T A A A G C C  
G T T G C G A C A A G C A C A T T G G T T T T G T T G A G T T T T A A A T T T A T A A A A T A T A C T T G C T A G T T C A T C G G C A T G C A  
T C T G T C C A T G A G C T A C G C C A A T A C G C G T T C C G G A A T C A A T G T T C G A A T G G T T T C T C C T A A A C G G A A A T  
A C T T T T C G A T G C G A T T G T G A A T A A C G T A A A C C T G C C C T C C A C G T A A A A G C T C A T G G C G T A T T G C T G C A G A T  
A G G G T T T C T T C A G A A T G C T C C A T G A C A A A T G T A C T G A C G G G A A G T C G A T C T A A A G G A G G C A T T G T A A T G A  
G A G A A A G G T C T C G A G C T C C A G A T A A A G A G A G A T A C A G A G T T C T T G G A A T T G G A G T T G C A G A A A C A G T A A G  
A C A A T C G A T T G T G G G G A A G C G T T C T T T T A G A G A A T C T T T G G C C T T C A C T C C A A A G C G T T G T T C T T C A T C A  
A T A A T A A G T A G G C C T G G A T T A T G A A A T T C T A T G G C T T T G T T A A T G A C T T T A T G A G T G C C A A T G A G A A T G T  
C A A T A C G T C C T T G G G C T A T A T C C T C T A A T G T T T T T T T C A T C G T T T T C C C T T G A G A A A G C G G G A C A A T A G  
T C C A A T T G T G A T G G G C A G C C C A G C C A T C C G T T G G G A A A A G T T T C A A A A T G C T G G T T C G T A A G A T C G T A  
G T A G G G A C C A T A A C G A T T A C T T G C T T G T G C C C A T C A C A C A C A G C T T T T A C G G C T G C C C G C A T A A T G A T T T  
C T G T T T T C C C G A A C C C T G C A T C T C C A C A A A T C A G C C G A T C C A T T A A T T T A T C A G A C A T C A T A T C T G C A T A  
A A T C T G A T C G A T A G C T T T T A A G C T G A T C T G G C G T T T C T T C A T A C G G G A A A C T T T C G G C A A A T T T G A T T A C C  
T C T T C T C C G T G C G G G G A T A G A T A A A A G A A T T C G C T G T A G A A C G C T G A G C T T C C A T T T G A A T C A G C T T T T  
C T G C A T A C A A A T C A C A G A A T T T T C T G A G A G C T C C C G A G A T C G T C G C C A C T T T G C T C C A T T C A A G T G A T G  
C A A A T C A G G A G C T T T T T C T G A A G C A C C A A C A T A G C G T G A G A T T A G A T A A G C T T G G T C T G A A G G G A C A T A G  
A G G C G A G C T T T G T C T G C A T A C T C T A A A A C T A G A T A A T C T G T T T C A A T A T T G A G A T G A T T A G G C T T T T T C T  
C T A T A C C A A T G A A T T T T C C A A T T C A T T G T G T A A A T G G A C T A C A G T C T C T C C T G G G A C T G G A A T A T A C A C  
T T C T T C C G T T G T A G T A G A A A A T A G T T C C G T T G T T T T G T C T A C G G A G G A C T T T G C T C G C T G C A A A T T C C  
G A A A G G G A A A C T G C A G C A A A T C C A G C T T C T A C T A A C G C A A A A C T G G A G G A G A G A G T T G T A G G A T G G T C G T  
A A A T T T G A G T G T T T G G G A T A C A G G C T G C T G C G A G A T C A T G A G C T T C T T T T A A G G A T T T T G T A T T G G A A C A  
A T A C A A A G C T A A A G A G A G C G T A C G C C A G C A C A A A A A T C C T G G A A G G T C T T T A A A A A T G C A A G T A A A G G G  
T T T T G C T C G C C A C T A G T T T T C T A T T A G T G C C G G A G G A T A G A T A A A A G G T A A A G A A A C T C T T T T G T A C A G A G A  
T C T T C T T A T G A A A A G C C T C T A T A G A A A T C C T G T A T C C T T A T G C G A A A T G A G A T T G G G G A A C G T T T T T T C  
T T C A A A A A A T A G A G G A G T A A A T T C T T T G A G A A T C C G C T G A C A T A G A T C C T G A A T G G G C A T A A A A C G T T T C

GGAAGAGATGCTAAGATGCCTGCAATATCCGAAA AATTATCTTCAAGAGACGAGAGCCCATCAAA GATAC  
AAA GCGGGAACGC TTTAAAATAATC CAAAAGTGAATAAGATAA TTTG TCTGTAGGAATGATTGCCGTCGC  
AGGAGAAA TGGTAA TTTGAGACAGC TTTCTGTAGAGAGTTGATCCGAAGGGTTGTAAGAGCGAATAGAG  
GAAA CGCGATCCCCCAGAATTC AATGC GAAAAGGTTCTGGAGAAGATAGGGG GAAA ATATCAACAATCC  
CTCCTCGGAATG CAAAGTCTCCTT TTTCCCTAGCTAGAGCTTCATGTCGATAACC TAAACT TTTACAAAG  
ATCGAGTAGGGTATCGGGATCCAGTTCTTCTCTACTCGAAGTTCGAGATGATCTCGGATCATAGATTCT  
GGAGAAGGAGTTC TTTCTAATAAAA GCCTTCAGTGTGTGACACAGATAACTGGAGCACTCTGTT TTTGCA  
GAGAATACAGAATATGGTCTCCTT TTTCCACCGCATCAACATTCACCAGCTTGGGGGA TAAATCTATTTT  
TGAAGCAGGGAACCAAGAGGCGATTCTGCCAATAGAGTGGT CAAATCTTCGAA TAAATCATCAAGTTT  
GCCGGTGTGCTAATAACGACGATAGAGCG TTTAAGTTC TTTGAATAGT TTTGCTATGA CAAAAGACCTTG  
CTCCCGAGTGGAGAT TTTCCACTAAGGACGGGAGCTTCGTGTCT TTTAATAAAA GAAA ACTAGAAA AATC  
TATGCTAGTTGGGTC GAAATCCATTGTCT TAAAGT TTTGTTAA GAAA CTCTATTTGAGGTAGCTCCGCG  
AACTACCTTGTGCC GAAATCGC TTTCCGCCACAACGCCACCATATGGAGCAAGAAGCTCTGCAAGTAA  
GGTGTGTGCCTGAACGCCTCGT TTTGT TAAATCATCGGAGACTCTAGACAAGACAATGTAGCGACCATT  
TTTTCTGTGATCCA TAAAGAAA TGAATTTGGTAGGGA TTTCTTTATGTATAGCA TTTGCGTAGTGTGAA  
TTC TTTGTCCTTCTCCTCAGT TAAATAG TAAACTAAGTACGAAGTATCACAGAT TTTCTCACAGGAAGT  
TAACAGGGTTTTTA CTGTGTGCTGAACAAGCTGAT TTTCCAAATCAGCAACTTG TTTGGCTAAA TCCTTT  
TTTTCTTCCATTACACTGCGGAT TTTGACAAGGA TTTGATC TTTA GGAGATTGGATAACGGTAGCTATCT  
CATTTAAA TCCACATCTTGTCCACGAGCAATATTCGCGCTCTTCTCCTGTTGTTGCTTCTATACGACG  
GATTCCTGTTGCAACAGCATGTTT TTTGGTAATTTCT GAAA TAGCCAATATCTCCAGTTGCCTGAGCATGC  
GTTCCCTCCACATAGTTCGTGG GAAAATCCTGC CAAAACAACACGAACAATATCTCCGTA TTTATCCCCG  
AAA ACTG TTTGATTTCTGAAGAGCTCATTACGTCAGAATA CAAA ACTTCTCGAATCGTTACCGGATCAT  
TTC TCTAATTTTTCTCATTACGAGAG TTTCTATTGCTAGAAGATCCTCTGGTGATAGCGCTTTG TTATGA  
GTAAA GTC TAAACGAATTT TTTGAGAGTCGACATAAGAACCTGCCTGACGGATATGTTCTCCAAGAGTCA  
TTTCAAGAGCTTTG TGTAGAAGATGGCATCCTGTGTGATTATTAGCGTTTT TTTCCGAAGGT TTTGGTT  
TACCTGTGCGGTGACAGCCATTGTCGTTGT CAAACTTTCCTTGAGAAA G TTTCCCTAGATGAACGATGAGT  
CCTGC TTTAGGGGCAATAGTATGAGATACCAGGAAA GTTCTGATTCACAGAAA TTTCTCCAGAGTCTC  
CTATTTGGCCACCTT TTTCCGCG TAAAACGGGGTGGTTCTG TAAAATAATTGCTCCTTTCATCTCCTTCTC  
CAGTGATGAAGCAAT TTTCTGTACTTAATAATTCCTTCAATAAA GGTGTGCGCAG GAAA GAGTATCGTAT  
CCGATAAA CTGGAAGTGTAGTTGGATC TAAATCTTGGAACACAGAATCACTGTCATTCTTAGTTTT T  
TCGTGTTTT TTTGAGAGCGTTC TTTAGCTTCTACTTCAAGCTTCT CAAAGGTATCCATATCTATTGCGTA  
GTTATAATCCTTTG CTAGTAGGGCAA TTTTCATCGATAGGAAGCCGTAAGTATC TTTGAGTTTGAAGGCA  
TCTTCTCCAGAAA TCTTAGCGGAAGAAGCTGAAGA TTTTCAGTACTTGTGGAGTAGATTCCCACCTCTC  
GCAACGT TTTGAA GAAA TGCTCTTCTTCTGTGGTCAAGACTTCTTGA TTTG TGTGACTGATGCAGAG  
TTCAGGATATGCTTCTCCATTACATCCACTAGTGAAGAACACATCGGCCA GAAAAGGGCGATTGAAT  
CCTAAGCGT TTTCCGTAATTGACAGCTCGGCGGAGAATT TTTCT TAAAACATAGCCTCGTTCAGTATCC  
CTGGTAACAGCCCATCAGCTATTGC GAAAGAAA GAGAACGGATATGGTCCGCGATCACTCGGAAGGCGG  
TCCT TTTGCTTCTGTTGGAGAGTATGTTGTCCCGA TAAATTTTC TAT TTTGGAAA TGAGATGCTTAA  
ACGTCTGCTTGAATACGGTT TTTGTTTCAGCTAATAGAGAAA C TAAACGTTCTAAGCCGGCACCTGTAT  
CAACACACTTCTCTG CAAAGCT TAAAAGAGTCCCGTCAGAAGTCTAT TAAACTCCATGAATACGAGGTT  
CCAATACTCTAAGAAGCGTTCTCCATCAACGTCTTCAAGAGGAGAAGCGGC TTTCCCAAATTTTTC TCCT  
CGATCGAA TAAAAGCTCGGAACAGAATCCGCAAGGTCGGTATCCGCCATACTCCAGAAATATCTTTGT  
CTGT TAAACGAAA AATTCTGTCTGTGCGAAGATAT TTTCC CAAA GAGC GAAA GCTTCATCATCCTTTTC  
ATGCACGGTGGCA TAAATAAAA ATCAGGAT CAAAATT GAAAACAGAAA GCGGAGACTTCCAAG CAAA GAA  
ATAGCGTCTTG TTTGAAGTAATCACCGAAGGAAA AATTCCTAACA TTTCAAAA AAGGTAAGATGTCGGG  
AGGTGTGTCCAACAT TTTCTAAA TCATTATGTTTTC CCCCAGCAGAAATGCATT TTTGAGATGTCGTTGC  
CCTTGTGTAACCTGCTGCTCT TTTCCCTAG GAAAATATT TTTGAAC TGGTTCATTCCCGATTCG TAAAG  
AGTATGGAAGGATCATTATGCGG GAAAACAGGAGAAGATGCTACAGGTGTATGGTTCGGTTAGCATAGA  
ATTTTAGAAA ATTGGATCGAAGAGTGTACTCAACATGGGGAGACCATTT TTTA ACTCACAACAATA CAA  
AAAGATTTGTC CAAA GACCGAGTCCACTAGTTTAAGGGA CAAA G TTTGGTAGGGACTTT TTTGAAGAGAA  
GAGGCCCTCGGCTTCAAGAAGGAATATACTAGTGGATCACTCATAATTAGAACAAGCCAAGATGTAAGCT  
TGTTCCGAGCGC TAAA AAAAAAGAA TTTCCGACAAA AAAATCGAAGAGAGGAAGGGTAGGATGAG CAAA AAA  
AAGAAA AAAAGAGAG GAAAAT TTTGT TTTATAAAA AAGGGTTGAGGATAGTGTGTGAGGGGATAAA TTGAG

AGGTAA GAAA AAGGTTT TTTG GGGAGTTGA TAAA AAATAGGTGCA TAAA AAATAGGGGGTAGCATAAG  
ATGTAGC TTTCTTTC GAACGAAGGTTGAAGGAAGGCCTCTTACGTGGATGAGAGGGCGCGACAGAGTGA  
AGGCTGAGAGGCTGGAAGCT TTTCTTAACAATG CAAA TGAGATAGAATGCAGGCCAGTATAGATGCTTGT  
GAGGA TTTCTTAAGAGATTAAGGAACCCGTTAA TAAAT CAAA GTATATATT TTTCTGAGAA TTTG ATCTT  
GGTTCAGATTGAACGCTGGCGGCGTGGATGAGGCATGCAAGTGAACGGAGCAATG TTTCTGGCAATTGT  
TTAGTGGCGGAAGGGTTAGTAATGCATAGATAA TTTG TCCTTAAC TTGGGAATAACGGTTG GAAA CGGCC  
GCTAATACCGAATGTGGCGATA TTTG GGCATCCGAGTAACGT TAAA GAAGGGGATCTTAGGACC TTTCTGG  
TTAAGGGAGAGTCTATGTGATATCAGCTAGTTGGTGGGG TAAA AGCCTACCAAGGCTATGACGCTTAGGC  
GGATTGAGAGATTGGCCGCCAACACTGGGACTGAGACACTGCCAGACTCCTACGGGAGGCTGCAGTCGA  
GAATC TTTCTGCAATGGACGGAAGTCTGACGAAGCGACCGCGGTGTGTGATGAAGGCTCTAGGGTTG TAA  
AGCAC TTTCTGCTTGGGAATAAGAGAAGGCGGTTAATACCCGCTGGA TTTG AGCGTACCAGG TAAA GAAGC  
ACCGCTAACTCCGTGCCAGCAGCTGCGGTAATACGGAGGGTGTAGCGTTAATCGGA TTTA TTGGGCGT  
AAA GGGCGTGTAGGCG GAAA AGGTAAGTTAGTTGT CAAA GATCGGGGCTCAACCCCGAGTCGGCATCTAAT  
ACTATT TTTCTAGAGGGTAGATGGA GAAA AGGGAA TTTACAGTGTAGCGGT GAAA TGCGTAGATATGTGG  
AAGAACCAGTGGCGAAGGCGCT TTTCTAA TTTA TACCTGACGCTAAGGCGC GAAA GCAAGGGGAG CAA  
ACAGGATTAGATACCCTGGTAGTCCCTGGCCG TAAA CGATGCATACTTGATGTGGATGGTCTCAACCCCAT  
CCGTGTCCGAGCTAACGCGTTAAGTATGCCGCTGAGGAGTACACTCGCAAGGGT GAAA CT CAAA AGAAT  
TGACGGGGGCCCGCACAGCAGTGGAGCATGTGG TTTA ATTTCGATGCAACGCGAAGGACCTTACCTGGGT  
TTG ACATGTATATGACCGCGCA GAAA TGTCGT TTTCTCGCAAGGACATATACACAGGTGCTGCATGGCTG  
TCGTCAGCTCGTGCCGTGAGGTGTTGGTTAAGTCCCGCAACGAGCGCAACCCCTTATCGTTAGTTGCCAG  
CACTTAGGGTGGGAACTCTAACGAGACTGCCTGGGTTAACCAGGAGGAAGGCGAGGATGACGTC AAGTCA  
GCATGGCCCTTATGCCAGGGCGACACACGTGCTACAATGGCCAGTACAGAAGGTAGCAAGATCGTGAGA  
TGGAG CAAATCCT CAAA GCTGGCCCCAGTTCCGATTGTAGTCTGCAACTCGACTACATGAAGTCGGAATT  
GCTAGTAATGGCGTGTACGCCATAACGCCGTGAATACGTTCCCGGCCCTGTACACACCCGCCGTCACAT  
CATGGGAGTTGGT TTTA CCTTAAGTCGTTGACTCAACCCGCAAGGAGAGAGGCGCCCAAGGTGAGGCTG  
ATGACTAGGATGAAGTCGTAACAAGGTAGCCCTACCGGAAGGTGGGGCTGGATCACCTCCT TTTA AGGAT  
AAGGAAGAAGCCTGAGAAGG TTTCTGACTAGGTTGGCAAGCAT TTTA TATGTAAGAGCAAGCATTCTATT  
TCATTTGTGTTGTTAAGAGTAGCGTGGTGAGGACGAGACATATAG TTTGTGATCAAGTATGTTATTG TAA  
AGAAA TAATCATGGTAACAAGTATA TTTACGCATAATAATAGACG TTTAAGAGTAT TTTGTCT TTTAGGT  
GAAGTCTTGCATGGATCTATA GAAA TTACAGACCAAGTTAATAAGAGCTATTGGTGGATGCCTTGGCAT  
TGACAGGCGAAGAAGGACGCGAATACCTGC GAAA AGCTCCGGCGAGCTGGTGATAAG CAAA GACCCGGAG  
GTATCCGAATGGG GAAA CCCGCTAGAGTAATAGACTACCATTGCATGCTGAATACATAGGTATG CAAA GC  
GACACCTGCCGAACT GAAA CATCTTAGTAAGCAGAG GAAA GAAA TCGAAGAGATTCCTGTGTAGCGGC  
GAGC GAAA GGGGAATAGCC TAAA CCGAGCTGATAAGGCTCGGGGTTGTAGGATTGAGGAT TAAA GGATCAG  
GACTCCTAGTTGAACACATCTG GAAA GATGGATGATACAGGGTGATAGTCCCGTAGAC GAAA GGAGAGAA  
AGACCGACCTCAACACCTGAGTAGGACTAGACACGT GAAA CCTAGTCTGAATCTGGGGAGACCACCTCTCC  
AAGGC TAAA TACTAGTCAATGACCGATAGTGAACCAGTACTGTGAAG GAAA GGC GAAA AGAACCCCTTGT  
AAGGGAGT GAAA TAGAACCT GAAA CCAGTAGCTTACAAGCGGTCCGAGACCAATGGCCCGTAAGGGTCAA  
GGTTGACGGCGTGCC TTTG CATGATGAGCCAGGGAGTTAAGC TAAA CGGCGAGGTTAAGGGATATACAT  
TCCGGAGCCGGAGC GAAA GCGAGT TTTAAAAGAGCGAAGAGTCG TTTG TTTA GACAC GAAA CCAAGTGA  
GCTA TTTA TGACCAGGTTGAAGCATGGG TAAA ACTATGTGGAGGACCGAACTAGTACCTGTT GAAA AAGG  
TTTG GATGAGTTGTGAATAGGGGT GAAA AGCCAAT CAAA CTGGAGATATCTTGTCTCTCC GAAA TAAC  
TTTA GGGTTAGCCTCGGATAATGAGCT TTTG GGGGTAGAGCACTGAATTCTAGCGGGGGCCTACCGGCTT  
ACCAACG GAAA T CAAA CTCCGAATACCAGAAGCGAGTCCGGGAGATAGACAGCGGGGGCTAAGCTTCGTT  
GTCGAGAGGGGAACAGCCAGACCCGCGATTAAAGTCCCTAAT TTTA TGCTAAGTGGGTAAGGAAGTGAT  
GATTCGAAGACAGTTGGAATGTTGGCTTAGAGGCAGCAATCA TTTAAA GAGTGCGTAAACAGCTCACCAAT  
CGAGAATCATTGCGCCGATAA TAAA CGGGACTAAGCA TAAA ACCGACATCGCGGGTGTGTCGATAAGACA  
CGCGGTAGGAGAGCGTAGTATT CAGCAGAGAAGGTGTACC GGAAGGAGGGCTGGAGCGGATACTAGTGAA  
GATCCATGGCATAAGTAACGA TAAA GGGAGT GAAA ATCTCCCTCGCCGTAAGCCCAAGG TTTCT CAGGGTC  
AAGCTCGTCTTCCCTGGGTTAGTCGGCCCCCTAAGTTGAGGCGTAACTGCGTAGACGATGGAGCAGCAGGT  
TAAA TATTCCTGCACCACC TAAA ACTATAGCGAAGGAATGACGGAGTAAGTTAAGCACGCGGACGATTGG  
AAGAGTCCGTAGAGCGATGAGAACGGTTAGTAGG CAAA TCCGCTAACATAAGATCAGGTGCGGATCAAGG  
GGAATCTTCGGAGGAACCGATGGTGTGGAGCGAGGC TTTCAAG GAAA TAA TTTCTAGCTGTTGATGGTGAC

CGTAC CAAAACCGACACAGGTGGGCGAGATGAATATTCTAAGGCGCGGAGATAAC TTTTCGTTAAGGAAC  
TCGG CAAATTATCCCCGTAACCTTCGGAATAAGGGGAGCCTTTTA GGGTGACTATGGAACGATAGGAGCCC  
CGGGGGCCGCAGAGAAATGGCCCAGGCGACTGTTTAG CAAAACACAGCACTATG CAAACCTCTAAGGG  
GAAGTATATGGTGTGACGCTGCCAATGC CAAAAGGT TAAAAGGATATGTCAGCTG TAAAAGCGAAGCAT  
TGAACCTAAGCCCTGGTGAATGGCCGCCGTAACATAACGGTGCTAAGGTAGC GAAAATTCCTTGTCGGGT  
AAGTTCGACCTGCACGAATGGTGTAACGATCTGGGCACTGTCTCAAC GAAAAGACTCGGT GAAAATGTAG  
TAGCAGTGAAGATGCTGTTTACCCGC GAAAGGAC GAAAAGACCCCGTGAACC TTTACTGTACTTTG GTAT  
TGGTT TTTGGTTTG TTATGTGTAGGATAGCCAGGAGACTAAGAACACTCTTCTTCAGGAGAGTGGGAGTC  
AACGTT GAAATACTGGTCTTAACAAGCTGGGAATCTAACATTATCCATGAATCTGGAAGATGGACATTG  
CCAGACGGGCAGT TTTACTGGGGCGGTATCCTCC TAAAAGATAACGGAGGAGCC CAAAGCTTAT TTTTCATC  
GTGGTTGGCAATCACGAGTAGAGCG TAAAAGGTATAAGATAGGTTGACTGCAAGACCAACAAGTCGAGCAG  
AGAC GAAAAGTCCGGCTTAGTGATCCGGCGGTG GAAAAGTGAATCGCCGTCGCTTAACGGAT AAAAGGTAC  
TCCGGGGATAACAGGCTGATCGCCACCAAGAGTTCATATCGACGTGGCGGTTTG GCACCTCGATGTCGGC  
TCATCGCATCCTGGGGCTGGAGAAGGTCCCAAGGG TTTGGCTGTTCCGCAAT TAAAAGCGGTACGCGAGCT  
GGGTT CAAAACGTCGTGAGACAG TTTGGTCTCTATCCTTCGTGGGCGCAGGATACTTGAGAGGAGCTGTT  
CCTAGTACGAGAGGACCGGAATGGACGAACCAATGGTGTATCGGTTGT TTTGCCAAGAGCATAGCCGAGT  
AGCTACGTTCCG GAAAAGGATAAGCATT GAAAGCATC TAAATGCCAAGCCTCCCTCAAGATAAGGTATCCCA  
ATGAGACTCCATGTAGACTACGTGGTTGATAGGTTGGAGGTGTAAGCACAGTAATGTGTTACGTAACCA  
ATACTAATAAGTC CAAAGACTTGGTCTT TTTATGATTGGAAGAGCC GAAAGG CAAAGACAATAA GAAAAA  
GAGTAGAGAGTGCAAGTGCGTAGAAGACAAGCT TTTAAGCGTCTATTAGTATACGTGA GAAAAGGATAACCA  
GGATTAGCTTGGTGATAATAGAGAGAGG GAAAAGCCTGACACCATTCCGAACCTCAGAAGTTAAGCCTCTG  
ATCGCTGATGGTACTATACAGAGAGTATGGGAGAGTAGGTCGTCGCCAAGCAT TTTTATTATATAAGATC  
TTAGTCATAGAC TAAAAGGAGAAGGGGTAGCCGCTAACGCAGCTACCCCT TTTCTTTTCTC TAAAAT  
ACCTTCTCTCTTCTTCTTGTGTAATCCTAGT CAAAATTATCTCTAATTCTCTACTATCTTCTTCTTATC  
CT GAAAAGTAGAG TTTAAGAAGTCTAGGGACTTAATTTAT TTTATTTCTCTTATTATCGAAT TTTTCGTTCT  
ATATTGGGTTAAGCATTTCGTATAGGTATCAACTTCTGC TAAAG GAAAAGAACATGGCTGGCAATAGTGATT  
TAGATATAGACATCTTA GAAAAGATTGCAGGAACCTAT TAAACAGTTGAGCATA GAAAGTATTCAGAAAGC  
ATCTTCAGGTCATCCAGGAATGCC TTTAGGATGCGCAGAGCTCGCTGCTTATTTAATATGGTTACGTATTG  
CGATATAAATTC TAAAAGATTCTCGATGGGTGAATAGGGATCGCTTTGTTCTCTCTGCTGGACATGGTTCTG  
CTCTTC TTTACTCGTG TTTGCATTTTAGCAGGATTCGATGTAAA CCTAGAGGATCTGCAACAAT TTTCTGTC  
GCTCCAATCTCGAAGTCCCGGCATCCAGAA TTTAGAGAACTGATGGTGTAGAAGCCACTACAGGACCT  
CTAGGACAAGGAGTAG GAAATGCTGTTGGAATGGCTC TTTTCAT TAAAAGTGTAGGAGCCAGAT TTTAATC  
AGCCTGCGAATTCTATC TTTGATG CAAAAGTGTATTGCTTAGCAGGAGATGGGTGCTTCATGGAAGGCGT  
GAGTCATGAAGCTGTAG TTTCCGGGTTCTTTAAGCCTGGATAATCTCGT TTTGATTTATGATTATAAT  
GAGATTAT TTTAGACGGGACTCTTCACGATGTAAGTATTGAGGATA CAAAACAGAGATTCTTAGCATATG  
GCTGGGATGTG TTTGAAACTGACGGACATGAT TTTGAGAGCTTCATCAGGT TTTACACAGATCAAGAA  
AAGCCAATG CAAAAGCTACGTTGATTATTGCACATACTATTATTGGACACGGCTCCC TAAAAGAAAGAAC  
AATAAAAGCACATGGGTCTCTTTTAGGAGAGGATGGTGTGCT CAAAC TAAAAG TTTCTGGCATCTCCAG  
AAGAAAAGTT TTTCTTTCCTTCGGCAGTGAAGATGTT TTTGCTG CAAAACAACAGGAAGGTAA GAAATT  
ACAGGAAGAATGGCAAGAAGCCTTCCGAGTCTGGTC TAAACAAGCTCCCAGCAACATCAAGAATATCTT  
CGATTGATTCAAGAGATCTCGATTCAAGAACTCGAAGAAAT TTTGAATCTTATTGATATGCCAGAGTCTA  
TAGCCGGGCGTGCAGCTTCGAA TAAAAGTCAATCAGGTATTAGCAGAGGATATTCCATCCCTCGTAGGGGG  
ATCGGCGGATCTCTCTAGTTTCAGATGGTACCTGGATAGC TAAAAGAAAGAACTATTAGTGCTAGCGATT TTT  
CTTGGGCGGAATATTCGCTATGGAGTGCAGCAATTCGGAATGGGCACGATTATGAACGGATTAGCGTATA  
GTCAAGTATTCCGTCCT TTTGGGGAACTTT TTTAGTCT TTTCCGATTATTTGCGTTCCGCGATTGATT  
AGCAGCATTATC TAAAATTGCCGGTAA TTTATCAGTTCACTCATGATTTCGATT TTTGTTGGAGAGGATGGA  
CCTACACATCAGCCTATAGAG CAAAATCATGTGCTGCGGGCTATTCAGGGCTAAGAGTGATTTCGTCCTG  
CGGATGCGAATGAAGT GAAAGGAGCATGGTTAGCTGC TTTAGAAAAGCCTGGTCCAACAGC TTTAAT TTT  
ATCTCGA CAAAATCTACCTACTCT TAAAAGAGAC GAAAAGCTTCTTTTCAGAGAAGGAGTAA GAAAAGGGTGCT  
TATATTCTGGT TAAAAGAGGAAGGAGATCGCCAGACTATACGCTGTGTGCTTCTGGATCCGAGGTGCATT  
TGCTATAGAGGTTGCA CAAAAGTCTTATGGCT TTTAGATAAGCGTGTGCGAGTGAT TTTCAATCCCTTGTG  
GGAGCTATTCGAGAGACAAGACGTTGAGTATCGCGAATCCGTAATAGGAGGAGAT TTTAGGGTTGCGTGTT  
TCTATAGAAGCAGGTACCGCCTTGGGTTGGTA CAAAATACATCGGTAGCAATGGCTTAGCCATTGCCATGG

ATGGGTTTGGAATGTCCGGAGCTCCCAATGAGGTGGCAGAGACTTGCGGTTTCACTGTGGATAATATTGT  
GCAGAGAATCCTTTC TGTAGAAA TCCCCGTCA GAAACTCCAGTTTGTTTCAGAAA GAGAATCATCGGCT  
TGCC CAAACTCCATGTGCGGCAAGCCTTTTGTTC TTAGTTCTGGGCCTGATTTCTTTGTAGAGAGG  
CAAA CACCTCAACGCCTGTTAGTATATGCTCTTTG GTGTGAGAGTTTAGGACTGCCGAAGTGC TTTCTT  
AGT TTTAATTCCATCTTTTCG CAAA GGTAGATCCGATATCAG CAAA AGTGCTCC TAAA GGAAGATTCCTT  
CGGTATCCTGCAG CAAA TAAGGTGGCACACTCCATCTCGACAGTTTGAGCTTTA TTTTCATATAGTTTC  
GACGGAACTCTTTA TAAA CTCC CAAA ACCGAATGTTAGTCGTGTGGGTGATGCC TATATGGTAAGGGAG  
GTT TTTG GCTTCGAGAATATTGGTGATCATT TTTG TACGA CAAA ATTAGCTAATGCAGGGACCTCTGGG  
GGGAAGTATGCATCTGATGTTCCATCTTTTCGGATGCTAGCAACAGGGA CAAA ATAATCTCCTA TTTG GT  
AGTGGGATCTTAAGCCTCCGCACATGCCAACATGATCGCTGCTGTAGCATTGGGAAG GAAA GAACACAG  
ATCTACGGTAAGAGCTGCTCCTGGAGAGCCTAA TTTAAA ATCGATGATTGAGGTGTGAA TTTG AGGCGCA  
TGCGCTGCC GAAA ACATGGATCCTCGA GAAA CAGGGACCTGATAGA TTTC AGC GAAA ACATCCACGTAAT  
ACC CAAA ATTAGTAAGAAGGAGATAGGGCTGGAAC TTTGAATGGTAGAGCCGGTATAGCGCTCTAGCAT  
GTCACAGGCGATTG TTTCTTCGCTGATTTTTTTA TGTGATGGGTCA TAAA TCACAGATATTATAATGGT  
TAGAGAATCTTTTT TTTCTAAA AACATAGTATGAAGATGGAACAAGTTGTTCTCGTGAGGGTAATAGTTGG  
GCTACT TAAA AGTATAGT TTTCT TTTG CAAGAAA GAGG GAAA GCG TTTGTTTC GCGACATTCTCTGGAC  
AAA GCTTAGAAGAGAACGATAACATGGATGGA GAAA AGATAACGGGTAAAGCGTGTATGGTTCTGTGTA  
GCACTAGTGAAT TTTCTGTGTAGGATTGCGCGTTGAGATCGATGGACAACCCTATGTAAT TTTG CAGAACGA  
T TTTG TTAAGCCAGG GAAAGGACAGGCT TTTA ATAGAAT CAAA GT CAAA AACTT TTTA ACTGGGCGTGT  
ATAGAAA AACGTT CAAAT CAGGGGAATCTATA GAAA CTGCCGATGTACGGGAGCAGCAGATGCGTCTTC  
TGTACACAGATCAGGAAGGGCTACG TTTATGGATGACGAGACCTTCGAACAAGAACTCATTT TTTG GGA  
CAAA CTC GAAA ATGTTCCGCAATGGTTATTAGAAGATACAATATATACGTTGGT TTTG TACAACGGGGAT  
GTGA TTTCTGTTGAACCTCCGATC TTTATGGAGCTCACTATTGCA GAAA CAGCTCCTGGAGTCCGTGGGG  
ATACTGCATCAGGACGAGTATTGAAGCCTGCAACAACCAATACCGGG CAAA GATTATGGTCCCTAT TTT  
CATTGAAGAAGGTGAAGTTGTGAAGTCGATACCGAACAGGAAGTTATGAGTCTCGTGTAT CAAA TAA  
AAATTAGAAGGGGCATTACGCCCCCTCTTCAAGAAGGCGTTCCGCCAC TTTCC GAAA TAATTGCGAAGGT  
TCAAGATGCGCTTGAGGCTCTAGGTAGTCTCTAGTCTGATTCTGGCATAGCAGCCAA TTTCTCTACCAGG  
CT TTTCTTT TTTG TG TTTCTTTGCTGGGAGATAGCTCGGT CACGAAGTTTT TTTAAA AGAGTCGCTTCTGG  
CGATAGTTCTAACACTTTTT TTTCTTTCTATCGGAGTCTTCCAGGTTCTGTTATTCTCAAGTTGAGTGCA  
GAGGA TTTATAAA GAGATGGTAG TTTCTTCGATAGAAA TGGTTAACGGAGTAGAGG TTTCTTAAGGTTT  
GTTAATGCCGCTGTGCGA TTTG ATATCCCCCTCTGGATGTAAGTCTATAATAT GAAAGCGTGCA TTTG  
AGGGAAGTGTAGTGAGCCGCTATTCCTACCAGAGGGAGATGATCGAGTCTACATAATGATCATG  
TCCATGTAGATAACAAGCGTACAGAAGGAGAATTCATCAGTAGGGAT TTTAGAGGGGCATAATTGAG TAAA  
TCATGAGCGGCTCTGTTGTGGGAGATAGAGGATAATGGTTAGCCACAATCACGTGTTCAGAAGCGGGAA  
GAGAA GAAAGAAA TTGTTT CAAA GCAAGGAGTTGAGAATCAGTCACTTCTCCATTCGCTGTATACCAACC  
ATTGAAGCAAGAACAATCGAGAAGAACTAACCACCATGTGGGAGTGAGTTT TTTAAA GGCATACGGTGA  
G TTTG AAGTTCT TTTA TTAG GAAA ATAGGA TAAA ACG TTTG TTT TTTCAAAGCCCGATGGGTGTATACAT  
CATGG TTTCTCTGGAAC TATATACACAGGAGCTACAGATTCAACGCGA GAAAGAAA TTC TTTAGC GAAA CG  
GAATCTGTATCGAGAGCGGTGATGGTCATATCTCCAGTCACACAGACACTATCTGCTTCAAGCTGCTTA  
ACGAGTTGAGGGAATCTCTGAGAGATTG CAAA AGCTT GAAAG GAAA CGCCTCCTATAAGTTGTCTTAGAA  
GTCCCT TAAAGCG TTTA TTGAAGCATT GAAA AGGATT TTTA GGGAGTACACAGAAGTGAATGTGCGGAGCA  
ATGGATCAGTCTAAA GGCCTGTGAAGCCTG TTTG GCATAGAGAAGCGATGGTTAATAGAGAACCCGATT  
TATTACAAGAGCATACCCTCGGTATGATAGGCGGATAGTTAG TAAA AATTAAGTTTT TTTCTCT TTTGC  
TGCAGGAGTCGGTGGGTAGT GAAA GAAGCTAAGAGAAGATCTACAGCGGTATGCAGGGAACAA GAAAA  
ATATCTAGCACAGCATT CAAA GGTGCAATGATTCCTGCAGAGATCATGTCTTCTA TTTGTTGAGATACAA  
CATTGAAGCCGAGACTTGGAGTCCCTAGAGAGCAGAG TTTA TCAGCAACAAGT TTTCTCATCCATATACAC  
AGAGTTAACCAGTTGTTCCAAGAGAGTGCAGCAGCGGTCTGTAAA ATCTGAACAGCAGCTTGTTCCTCT  
TGAGAATGCTCTGAAGAGGAAGAGAGGCTCTGAGTAGCG TAAA GAAGAGCCGCTCCGCCTCCAAGAC GA  
AACAGATTCTGTGTTGAG TTTA GCGT TTTGAGAGCTAATTCATGTAGGGGAGCTGTGTCTCTGCTTCAC  
CGGAATGATTGCGATACTGT TTTCTAAGCGATGT TTTCTTTT TTTAAGGAGT TTTCTGGGATG TTTCTGTCT  
TCTGAGTTGTGTATAGCGTATCGAGTTGTGCAACT TTTAG TTTCTACTTTCAGGAACCAGATTCTCAC  
AGACAAGTAAGGTATGATCGCGAGATAGTTCTGCCAGGTACAGGATCCTAGTAGAGGCAGTTCTATAGG  
AGGCTTATTAGA GAAA GCGGCGAG GAAA AGACCGTTGTCCCTGTAAG CAAA GCGATGTCTTCTAACAGA

GTGGTATCGGGGATTGTCACTACTAGAACATCCAACAGTCCCCTATACGGTTTGCAATGCAGGTAGCTA  
GTGGGTCGGGAGCTATCTCCTTA<sup>CAAA</sup>AAATGATCAGAGGAGTTTGTTCTTCGGAGAATTTTTGAGTAA  
GGGCA<sup>GAAAAG</sup><sup>GAAA</sup>AAGACAATGGATTTTCGTATCTGTGA<sup>CAAAA</sup>AAATTTTAGGAGCTACAATAGGATTT  
TCAT<sup>GAAAAG</sup>AGTTCATGAGG<sup>GAAA</sup>AATGACGGCATTCGATAGCCCTTTTGCGTTTGTAATCCTTTCACCA  
GGTGTAGCGTAGAGCCGCTTC<sup>TTTG</sup>AGA<sup>TAAA</sup>GCAACAGCTCCTTCATGTCTGTATAGGCAACGGCTTC  
AG<sup>CAAA</sup>AGCCTCTCCAATAAGAGGATCAGGAAGATGGGAACGAATGAGCCCAGCACTTTTGAAGCATCT  
TTTA<sup>AGA</sup><sup>GAAA</sup>AGAGTGCGAATGCAGATAGGCGCACACCGCTCTTTT<sup>G</sup>AGAGGCGAGGGCAGAAGCTA  
AAAGTCGAGGAG<sup>GAAA</sup>GTCCTTGATCGA<sup>TAAA</sup>AGGAATCGATGCC<sup>TTTAAA</sup>AAGGCTCG<sup>TAAA</sup>AGAATAAC  
AGAAGAGATCACTCCATCAGCATGACGTTTATGGATCCGTTT<sup>G</sup>CTAGAGATCGAG<sup>CAAA</sup>ATAGACTCCA  
ATACGTT<sup>GAAA</sup>GGATCA<sup>GAAA</sup>GTTCTATACGC<sup>GAAA</sup>GAATATGATAGCCTCTCC<sup>TTTGAAA</sup>AAATCTT  
TCGAAGAAGAGGAGTACGCGGGGCCA<sup>TAAA</sup>ACCCCTTTACTA<sup>TTTG</sup>ATACGCCCTTATCAAGGCC<sup>TG</sup><sup>TAAA</sup>  
CAGTTGATGAATAGTATTGCGATGCATCTCATTGTTGTCTGTGAGGCATAGCGGGGTATCCTGTAACGGTT  
TC<sup>TT</sup>CATACCTAGA<sup>CACT</sup>ACCAACTCGCCAGTTAGATCACAACGAGA<sup>TTTA</sup>AGAAGGTGGCACCCGGAA  
TCGAACCGGGGATAGAGGCTTT<sup>G</sup>CAGGCCTCGGCC<sup>TT</sup>ACCGCTTGGCGATGCCACCGGGAGATATCCGAG  
TGTACGCGATGTTATGAG<sup>GAAA</sup>AGTCAATAACAGTGTGCATTTTC<sup>T</sup>GGGATCTTTTTTT<sup>TTG</sup>TAAGCAGGA  
TGAA<sup>GAAAA</sup>AAATTTTC<sup>CT</sup>GAAAGCTTT<sup>TTTA</sup>TGTGAGT<sup>GAAA</sup>AGCG<sup>TTTCTTTA</sup>GAGGTTGAATTGATAA  
TGGATATAGAATAATTT<sup>TTA</sup>AGACTGCTAGTAGAG<sup>GAAAGAAA</sup>AGAGAATCTTT<sup>TTA</sup>GGAGATGGCGGGG  
GAGTGCCTCTTC<sup>TAAA</sup>ATCTA<sup>TTTCTTTG</sup>AGATTT<sup>TTTAGTT</sup>TGTTGGTATTCGGCACGAAGCCAAGGGAT  
CTGTTATGCGCCCTAT<sup>TTTG</sup>TTGGAAGAATGGTCTTC<sup>TTTG</sup>TTATTAGGTATG<sup>GAAA</sup>TCCCTCGCTCGGG  
GAA<sup>GAAA</sup>GTGACAGGAGTTGCTATTGACAGTCTGACTCGTATTGCCTGGGGACGTGTTTT<sup>TTTG</sup>CTCTTCCT  
GGGAATCGAACGAGTGGCCACCTATT<sup>TTTAAA</sup>ACAAGCAGCACAACTCGGAGCAGTTGCTGCTGTAGTCG  
CAAGCGATTATCATGGTCCAAGTTACGGTCTGCAGTTATTGCGTGTGGCGGATCCTCGAGAAGC<sup>TTTACG</sup>  
GGCAGCGGGCGTACCCAAGGAGCTCT<sup>TTTC</sup>CATGGAGAAGTTATAGGAATCACTGGATCTGTAGGGAAG  
ACA<sup>ACTAC</sup><sup>TAAA</sup>AAAT<sup>TTTG</sup>CAAA<sup>TC</sup>AGTTGC<sup>TTTC</sup>TTCTGTCTA<sup>TAAAGTC</sup><sup>TTTA</sup>TGAGTCC<sup>CAAA</sup>AGCT  
ACAATTCGCAGTTGACGCTGCC<sup>TTTA</sup>AGCGTT<sup>TTTA</sup>ATGGCCGATGGGGATGAGGATTT<sup>TTTA</sup>CTTCTAGA  
GATGGGAG<sup>TTTC</sup>TGAACCTAATAACATGAAGAATCT<sup>TTTG</sup>GAGATCATTGAGCCTACAATCGGTGTGATC  
ACACATATCGACGTGCAGCATGCTATGCATTTTC<sup>T</sup>GGATA<sup>TAAA</sup>GGGGCTCAAGGTATCGTCGAG<sup>GAAAAA</sup>  
GCTTGTCTTTG<sup>GAAA</sup>GATGTGGGTTGCAGCTCATTCC<sup>TAAAGACT</sup>CTTCTTGG<sup>TTTC</sup>AGTTTT<sup>TTTG</sup>CAAA  
AAAGAATTCTGCAGCAGAGCGGT<sup>TTTC</sup>TT<sup>TTTC</sup>TATGAGCAAT<sup>GAAA</sup>CGGCAGATTT<sup>TTTA</sup>ATTATCGAGCG  
ATTCATTCCGAAGGAGTCC<sup>TT</sup>ATTAGTGTCTCGATGGGGACATTGAGTTGCCTGCCGTATTT<sup>TC</sup>CGTATT  
CTCCAGCGTATATGAAT<sup>TTTA</sup>ATTATGCGAGTAGC<sup>TTTG</sup>GCTTGGATTACGAATGTTCCCATGGATCG<sup>TTT</sup>  
AGAGCAGGTGAGTCAGTCTCTGTT<sup>TTTG</sup>CCTGCCATGCG<sup>TTTC</sup>GAACAGCAAGAGCACAAATGGTATCCGA  
GTGATTAATGATGCATATAATGCTAGTCTGATGCAATGCTAGTGC<sup>TTTA</sup>GATGCTGTTCTCTGTTCTC  
CAGAGGGAGGTAAGATCATT<sup>TTTA</sup>TCCTTGGGCATATGGCGGAGTTAGGACGATATCCGATGAATGCCA  
TATTGCTGTAGCTAG<sup>GAAA</sup>GCTGTGA<sup>CAAA</sup>AGCTCACATCATCTTT<sup>TTTG</sup>TTGGAGA<sup>GAAA</sup>TGGTTCCT  
GTTAGGGATATAGTTCGTGATGCGGATTGCCAGATTGGGT<sup>TTTA</sup>TAGCGCAGTGAGCGAGATTATGGATA  
CCGT<sup>GAAA</sup>GCTCTCGTTCAACAGGGAGATGTTGTGTTGT<sup>TAAA</sup>AGGGTCTCGTAG<sup>TTT</sup>AGA<sup>ACT</sup>AGAGAC  
TTTA<sup>TT</sup>ACCATGCT<sup>TTTC</sup>GATTT<sup>TC</sup>ATAGG<sup>TAAA</sup>AGATCAGAATTT<sup>TC</sup>TT<sup>TTA</sup>AGAATAGAA<sup>ATAGTT</sup>AACT  
TTCAAGTCGCTGTAAGATGCTCTTT<sup>TTTA</sup>ACTTGCC<sup>TTTG</sup>AAA<sup>GCTT</sup>AAGTT<sup>TTA</sup>AGATAGAGAA<sup>TTTC</sup>TT  
ATAAGAGCTTCCCATAA<sup>TAAA</sup>ACGAGAAAACAGATGCTGCCTCTAACGTATGTTGT<sup>GAAAGCCT</sup><sup>TTTC</sup>TA  
TTGGCTGTTTT<sup>TTTA</sup>GCCTTTTT<sup>TTTG</sup>AT<sup>GAAA</sup>CC<sup>TTTG</sup>ATTT<sup>TC</sup>TTGGT<sup>TAAAAA</sup>CAAGGT<sup>TTTC</sup>CAAGA  
TCATATTCACA<sup>AAA</sup>GATCACTGC<sup>GAAA</sup>AATTAGAAGAGTTACATA<sup>TAAA</sup>GACA<sup>AAA</sup>GCATATATCCCTACAGCT  
GGAGGGATAGTT<sup>TTTG</sup>TT<sup>TTTG</sup>CATCTGTGTTGGCGGTTCT<sup>TTTA</sup>TTGTTCCCCATACAGC<sup>TTTG</sup>GTCTA  
CATGGT<sup>TTTG</sup>TATTGGA<sup>ACT</sup>ATTCTATTATGGGGAGCATTAGGATGGTGCATGATCAGAT<sup>TAAA</sup>AAATCG  
GCGTAGAGTAGGGCATGGGTTGTCTGC<sup>TAAACATA</sup>AG<sup>TTTC</sup>TTATACAGAATTG<sup>TTTG</sup>GCGGGCGGGGGTG  
GTTCTTCCTATTATGTTCCGATA<sup>TAAAGAAA</sup>GT<sup>TTTC</sup>TTAGT<sup>TTTC</sup>ATCTTCCT<sup>TTTC</sup>TAGGAATCG<sup>TTT</sup>  
CTTTG<sup>CC</sup>ACATCATGGTGGAGCTATCTACTCAGT<sup>TTTG</sup>CTATTGCAACATTGGCTATTGTTGGAACGAG  
CAATTCAGTCAATCTCACTGATGGATTGGATGGACTTGC<sup>GGC</sup>CAGGAGCTATGGTGATAGCCTGCTTAGGG  
ATGCTTGTGCTTGGCTTGTACTAATGGAGCTCCTTGGGCCTTCA<sup>TTTG</sup>TTGTGTTCTTCTAGCTACCTTAG  
CTGGAAGTTGTCTGGATT<sup>TTTA</sup>CGTTACAACAAGTCTCCTGCCCGTGTCT<sup>TTTA</sup>TGGGAGATACAGGATC  
TTTG<sup>TT</sup>TTTAGGAGCCATGCTCGGTATGTGTGCTGTATTATTACGAGCAGAG<sup>TTTC</sup>TTCTCTTG<sup>TTTA</sup>TG  
GGAGGGATTT<sup>TTTG</sup>TTCTGGAATCACTATCTGTGATTGTACAAGTCGGAAGTTA<sup>TAAA</sup>TTAA<sup>GAAA</sup>GAAAC  
GAGTC<sup>TTTCTTTG</sup>TGCCCC<sup>TTTA</sup>CACCATCATTATGAGTATAAGGGGTTATCA<sup>GAAA</sup>AGGCTGTAGTGAG

GAA TTTCTTAATTGTCGAGCTTA TTTGTGTAGTAGTTGGGATCATTGCAGTA TTTGTGGATTAGAGGAGA  
GTTAGATGGGATTGGAGCGTGTGTCGTTATCGGCCTAGGTGTCTCTGGGAGGTCATTGCGCGT TTTCT  
AGCT CAAA AAGGTGTATGTGTATTGGGTGTAGACAAGTCGCTTCATGCACCTCAGAATTGCCCGTATATT  
CAG GAAA AATA TTTG GAGAACGAAGAGTTCCTTCACAGGTGGATTATGTTGTTCTCCAGGAGTAT  
CCAAGGAGCATCCTTGGGTACAGGCTGCGATAGCCTCGCACATTCCTGTCTATGACAGATATTCAGTTAGC  
T TTTCAAACAGAAA AA TTTACAGAAA GAGAGTCGTTAGCAATCACAGGGACTACAGGTAAGACAACCACA  
ATATTATT TTTAGAATACTTATT CAAA CGGTCTGGGATTCCTGC TTTGCTATGGGGAATGTAGGAATTC  
CTAT TTTAGATGGTATGCAGAATCCTGGAGTGGGATGTT GAAA TCAGCTC TTTCCAGCTCGCTGATCA  
A GAAA AATCCTATCCTGTCTTATCTGGAGGAATGATTC TAAA ATATCTCAGATAACCA TTTAGATTATCAT  
GGGAA TTTCTCTGAGTAT TTTCAAGCCAAG CAAA ATCTTGC TTTA TGTATGCGTAATCCCGATGACC TTT  
GGGTAGGAGATGAGCGTT TTTA CGGCCACTTGTA TTTA GAAGAAGTACAGAAGTATATGCG TTTA TTAGA  
TAAA GAAA GTGCAT TAAA ACCATTGTACTTGCATGATAAGTACAAC TACTGTTGTGCCTATCTGCTTGCT  
AAA ATAGAATTCCCAATATCC GAAA CTAGCT TTTA TAGAGGCTGTGGCTACT TTTA ACAAGCCTCCTCACA  
GGATGGAATATTTG GGG CAAA AGCAAGGCATACATTATATCAATGATAGTAAGGCAACCACGGTGAGTGC  
TACA GAAA CAGCTCT TTTAGGGGTTGGGAATCAGGCAATTGTGATTCTCGGAGGAA GAAA TAAGGGATGC  
ACGTTCTCTTCGCTTCTTCCCGC TTTGC GAAA AGCTGCGAAGAGTGTAGTCGCTATGGGAGAGTGCAGCTC  
AGGAGATCGCTCGAGATCTAGAAGAGTTCCTGTAACCGTAGT GAAAAA TTTA TCTGAGGC TTTA CTATG  
TGCTGAAGAGCAAGCAGTGCCTGGAGATGTGATTGTATTGTCTCCGGCTTGTGCTAGC TTTGATCAATTC  
CGTAGCTATGAAGAGCGAGGGGCAATG TTTAAGCA TTTGGTTGGGATGGAAGAGGTTCT TTTA TGAATCG  
TAGAAA CACGATGATTGTAGCAACTACTGTGAATGCAGTGC TATTGGCAGTGC TG TTTATGACCGCGCGC  
CATT CAGAGCAA GAAA TAGAGTATCCTCAGAAA ATAGCTCCTAT TAAA ATCTTAGAGCCC GTTCCGGTTG  
TTGATAAGGCTCCAGAGAAGTTAGA GAAA AAGCCTGAGGTGATTGCGAAGCCTTCTCAGGTGCTTA GAAA  
TCCTGTCG TTTCTAAA GCTGAACTTGTGCGCAA TTTGCGGA CAAA AATCCTAAGACAGAGAAGGAATCT  
AGCGGGGGCTC TAAA AAGATTTT CATCTACCCTGTAGAATCGACACTCCTGTCTCCAGAAA TTTCTG  
TTGTGAACGCTAAGGTAGTAGAGAAA ACTCCT GAAA AAGAGGAATTCTCTACTGTTATTGTTAAGAAAAGG  
AGACTT TTTAGAACGTATAGCTAGATCCAATCACACTACAG TTTCTGCATTGATGCAGTTGAATGACTTA  
TCTTCGACACAGTTACAGATAGGACAAGTGTACGAGTTC TAAA ACGAATAAGACAGAGAAGGATCTTC  
AAGTGAAGACTC CAAA TCCGGAAGATTACTATGTAGTCAAGGAAGGAGATAGTCC TTTGGCCATTGCATT  
GAGTAATGGTATTTCG TTTGATGAGTTGTTGAAGT TAAATGGATTAGATGAG CAAA AAGCTCGTAGATTA  
CGTCCAGGGGATAGATTACGAATTCGA TAAA TCTCTGGAATTATTAT GAAA TGGTTCCTGATTTTCTGTT  
TATTAGGAATTT TTTCTCTCGGACTGATCATGGT TTTGATACCTCATCAGCAGAGG TTTGGATCGAGC  
TTTG TCGTGTAGTACACA CAAA GCTCTGATCCGGCAGATTACTTATCTTGGATTGGACTTGGTATCGCT  
TCAT TTTGTGTACATCTTAGGATGGAAGGATTTCTT GAAA ATGAGCCCTATGTTGCTGAT TTTCTAGGGA  
TTACTCTTGT TTTA GTTCTTATTCCAGGTATTGGTG TTTGTAGAAA TGGAGCTAAGCGTTGGCTGGGAGT  
GGGCGAGTTAAC TTTA CAGCCTTCTGAA TTTGT TAAA ATTTA GTTCCATGTGTGCTATCGAATG TTTA  
ACAAC GAAA CCTTCTATTTCGTAGTAGT TTTAAA CGATTTCGTAGC TTTCTGTTGCTCTGTTGTTA TCCCA  
TTATGTTGATAGCGATTGAACCGGACAATGGATCTGCGGCTGTGATCTCAT TTTCTTAATTCCAGTTT  
TATCGTAACTGCAGTACGATTACGTTATTGGCTGGTTC TTTGCTATGTGTTCTGTGTATTGGAGGCACA  
TTTG CCTATCGTCTCCCTTATGTTCCGAATCG TTTG CAAGTTA CCTACATCCTGAATTAGATAT TAAAG  
GAAGAGGTCATCAACCTTACCAAGC TAAA ATTGCAGCAGGATCTGGAGGAGTG TTTG TAAAGGTCAGG  
AAA AGGATTACAAA AATTA ACTTATCTTCCAGAAGCTCAGAATGATTACATTGCTGCTATTTA CGCAGAA  
GAG TTTG GATTTA TTGGGATGCTCCTATTGATTCTTCTCTATATGGGA TTTATTTA TAGCGGGTATGTCA  
TTGCAATGCGAGCCTCGCT TTTA TCTGGAGCGGCTCTTGCTA TTTCA ATCACTGTGATTATTGGGATGCA  
AGCT TTTA TTA ACTTGGGTGTTG TTTCTGGGTTATTACCTAGCAAGGGAGTGAACCTTCCATTT TTTAGT  
CAGGGAGGCTCTTCTCTAATTGCTAATATGTGTGGCATGGGATTGCTATTAAGGATATGTGATGAAGAAA  
ATCAA CAAA ATCGTATTGGCAGTGGGGGGAACAGGAGGGCACAT TATCCCTGCTCTAGCAGCAAGAGAGA  
CT TTTA TTCATGAAGACATAGAAGTCTTACT TTTA GG GAAAGGATTAGCTCATTT TTTAGGGGATGATTC  
AGAGATTGCCTATTGTGATATCCCTTCAGGATCGCCT TTTCTTTG CGTGTCAATCGGATGTTCTCTGGG  
GCTAAGCAGTTATA TAAA GGTTATGTGCGAGCTCTA CAAA AGATCAGAGAT TTTA CTCTGATTTAGCAA  
TAGGA TTTGGGAGTTACCATTCCCTACCTGCTATGCTTGCTTCTATAAGAAGTAGGATTCCTCT TTTCT  
GCATGAACAGAATATTGTTCCCTGG GAAA GTGAATAAGTTAT TTTCA CGT TTTG C TAAA GGTGTAGGGATG  
TCT TTTG CAGCAGCAGGGGAACA TTTCA ATTGCCGAGCTGAAGAAGTCT TTTCTCCCTATCAGGAAA CTGT  
CTGAGCAGATCGT TTTCCCTGGAGCTTCTCCTGTCA TTTGTGTGGTAGGAGGATCCCAAGGAG CAAA AAT

TTTAAA TGATGTTGTTCCAAAAGCCTTGGCTCGTATTCGAGAAA GTTATTTCGAA TTTAATATGTTTCATCAT  
ATTGTAGGGCC TAAA GGAGACCTTCAAGCGG TTTCTCAAG TTTA TCAAGATGCTGGTATCAATCATAACAG  
TTACCGCA TTTGATCACAATATGCTCGGCGTACTACAGGCAAGCGA TTTAGTGATTAGTAGATCTGGAGC  
AACGATGCTTAATGAGTTGC TTTG GGTTCAGGTGCCTGCCATTCTTATTCCCTTATCCAGGTGCTTATGGA  
CATCAAGAAGTGAATG CAAAATTCTTCACGCATACTGTAGGTGGAGGGACTATGAT TTTGCAGAAGTAT T  
TAACAGAA GAAAG TTTGAGTAAGCAGGT TTTA CTTGC TTTA GATCCTGCAACCAGT GAAAATAGGCGCAA  
GGCTATGC TTTCCGCACAACAGAAGAAGTCTTTCAAATCACTGTATCAG TTTATTTG TGAATCTCTATAG  
GCTCATGAT GAAAAGCTTGT TTTA CCAC TTTA TTGGTATTGGTGGGATTGGAATGAGTGCT TTTA GCACAT  
GTTCTGCTCGATCGAGGATATAGCGTATCGGGAAGTGATC TTTCCGAGGG GAAA GTGGTAGAGAAGCTGA  
AGAA TAAA GGAGCGGAATTCTT TTTA GGGAAATCAAGAAGAACATATCCCTGAAGGCGCTGTAGTTGTATA  
CAGTTCAAGTA TTTCTAAAGAAA ATCCTGAATT TTTA TCAGC TAAA AGTAGAGGGAACCGTGTAGTTTCAT  
CGAGCCGAATTATTAGCCGAGCTTGCTCAAGATCAGA TTTCTATT TTTGTTACAGGAAGTCATGGGAAGA  
CAACAGTCTCTTC TTTGATCACAGCCAT TTTGCAGGAAG CAAAAGAAA AATCCGTCC TTTGCTATAGGAGG  
TTTG AATCAAGAAGGCATCAATGGTGGTTCGGGATCTGAATAT TTTG TTGCTGAAGCAGAT GAAA GCGAT  
GGGTCTATTCGGTGT TATACTCCAGAGT TTTCTGTTATTACGAATATAGATGATGAGCATCTGTCTAAT T  
TTGAAGGAGATCGAGAGCTTCTTCTGGCTTC TTTGAAA GAC TTTG CACTCAAGACTCAGCAGATCTGTTG  
GTATAATGGAGATTGTCCTCGCTTGCCTTCATGCTTGCAAGGGCATACT TTTG GATTGGACTCTTCTTGT  
GATCTACATATTCTATCTTATTATCAAGAAGGATGGAGACTGTAC TTTACAG CAAA GTATCAAGATGTAG  
TGTATGCAGATATAGAAGTGCAATTTGGTTCGGCATGCATAACGT TTTGAATGCTGCAGCAGCTATGGGAAT  
AGCTCTGTCAATTGGGTATAGATGAAGGTGCTATAA GAAATGC TTTCCAGAGGGT TTTCCAGGAGTT CAAA GA  
CGATTA CAAAAGAAA GAATTCTTCTGAGACC TTTCTCTT TTTA GAAGATTATGCACACCATCCTTCAGAGA  
TTTC TTGTACATTACGTGCTGTTCTGACTGCTGTTGGACAGAGACGTAT TTTAGCTA TTTG CCAGCCTCA  
TCGTT TTTCTCGATTAAGAGAGTGTATAGACAGCTTCCCGTCAGCA TTTAAA GATGCTGATGAAGTCTTG  
TTAACAGAAGTGTACAGTGC GGGAGAGGAGGGCGGAAGATATCTCGTACCAAGAGCTTGCTGAAGCTATTA  
GTCAAGAGTCGATAG TAAA GTGTACGCATATCCG TTTTCATGAGTTGCAGAGACA TTTAGAGCAGTCCAT  
CCGTGTACACGATGTGTGTGTATC TTTAGGTGCTGGTAATATTGTGA TTTGGG GAAA AGTTAAGAGAT  
TTTGAGCCT CAAA AACTGCACCTTAGGAATTA TTTG TGGAGGGAAA TCATGCGAACACGAGAT TTTCCGTTT  
TATCTG CAAAAAATATAGC TAAA CATC TTTCAA ATCCT TTTA TGATGTGAGTTATTT TTTAATTACTCG  
AGAAGATTATGGGAGAGCGTCTCTTATTAGAGACTGCTGAAGACTCAGG GAAA TCCGTT TTTGATCCA  
GAAA TAGCTCAGAGACTAGAAA AAGTAGACGTAGTGTGCGGATACTACATGGTCCCTATGGTGAAGATG  
GAGCTATGCAAGGA TTTCTAGAGACTATTGGTAAGCCTTATACAGTCCCTGCTATCGCTTT TTTCTGCGAT  
AGCAATGAA TAAA GTG TTTACTAAGCGC TTTATGAGTGAT TTTA GGGATTCCCTGCTGTTCCCTTATCTCCCT  
TTAACATTAGCAGGATGGAAGCAAGAACAAGATAAGTGGTTAGCACATATTGTAGAGGCTT TTTCA TTTT  
CTATG TTTGT GAAA TCTTCGCAT TTTA GGATCTAGTATCGGCGTCTTCGAAGTTCATAATGTTATAGAATT  
ACGAGATGCCATTAATGAAGCT TTTA TGCGAGATAACGACGTG TTTG TAGAA GAAA ATCGCTTAGGTTGC  
AAAGAAA TAGAAG TTTCTGTCTTAGGAGATGGATCTGGTGC G TTTG TCATTGCTGGTCTGCATGAGCGTC  
GTGGGAGTGGAGGT TTTA TAGACTATCAAGAGAAGTATGGGTTAAGTGGCAAGTCTAGTGCAGATCGT  
ATTTG ATACAGATCTCTC TAAAGAAA TACAGGAA CAAA TACTAGAAGCTGCGGA TAAA TTTA CCG TTTA  
TTGCTAGG GAAA GGGTCTGTGCTATTGACTTT TTTG TAGATGAAGAAG GAAAT TTTCTGGTTATCTGAGA  
TGAACCCCATTCCTGGAATGACA GAAA CGAGCCCA TTTCTTACATC TTTCA TTTG TAAAGGGTGGAGTTA  
TGAACAGATAGTCCATCAACTTGTATTGATGGGCTGCAACGA TTTA ACCAACGCCAACGCTTGATATCA  
ACGCTCT TTTG TAGATCAAGCGTTTCGCTATTAGTAAGCTCCAACAAGAGAGACTC TTTGTTGGGCAATCA  
AGCTAATCATGATGATGAGAGCAGCTACAACCTGGGCATACACCTGCAAGAGATCGTACAATGACCGAAG  
GTTCTTCTTCGATGCTAT TTTCCAG CAAA AGAAGAATCTTCTTC GAAA TCTTCGGCAGAAGCTGCAGAGAT  
ATAATC TAAA GACAAA ACTTCTTCATCTGTGAGAGAGCCGT TTTCCAGGTTGAGCAAGCTCAACAAGGATT  
TT TTTCTGCAATCTAGCGCTACACGT TTTA GAATGGTTCTTAGCGCTTGATGG TTTGTCCT TTTCTCC  
CGATGATC TTTCCAATATCTTCAGAAGCGGCATGGATCTCCAGCTTAAGGGTTGCGCTGGC TTTGTCCTC  
GGATGACCGAATCTCAACGGCGTTGGGATCGGTAAC TAAATTT TTTA ACGATGTACGCTG CAAA ATCTTCC  
ATAAA ATCCAATGTAAA ATGAGAAA TAAA AACCTTGATAAGAGTCTCTTGCCCAAGATTGTGGGAAGAAT  
ATAT GAAA TTTCAA AAAAGCGTCAATAT TTTCCGCTTATAGGCCACTATGGGCTAA TTTATGGT GAAA AAT  
TCTAGAGATA GAAA CCTCTTCA TTTACG TTTAAG TAAA AGATAGTCTTCGCAACGAAGGTGCG CAAA TGAC  
AGCTTGTGAGGAGAGAAGGCTCCTAGAGAGAGTGTGTTGATAGTGTGGATTCCAGGAAG GAAA GAG  
TC TTTAC GAAA ACGTAAGAGTGTCCAGAAGATAAGGATACCA CAAA TTTCTCCCGGATAATGATCGATT



GAGATAAGTCAATGATGCTAGGAGGATCCATCTGTAGTTGATCTATTAGGCTCGTGACAATAGACAGTGT  
TTGATGTGGAATGCGTGTTTGGGAAAAGAGCTTGTGCGAAAAGAAGACTGTAGGTAGTTCTAAGGATTGA  
AAAAAGGGCAAAAGCTGGGAAGGTTGTCCTTCATAACCTATGAATGTATGAGTTTGATTTCTAAA  
CTAATGGAGTATGCAAGCATAGGAAATAGCTAAGCCTTATGATCAGGAACCTTCTCAATAGAAATAAA  
AGAAAAACTCCTAATTCATTTAAAAGTGCTCGGCAGACTTCGTGGAAAATGTCTGTAAAAGCTGGAGGG  
GAATCAGCAGAAAATGATGCAAGATATCCGAGAAAAGGCTCAGGAAGGCAAGGAGGCTCCGTACAGGTAA  
GAAA  
CAATGTCTTAATAGGCGTTAGGGAGTGCTTGAATTTAAA  
AACTAGGCAGAGTCAGCCATAAGCC  
GATGGGTAAAAGACGAGAACGCTAACGAAGATACACAGGAAAGCGTAGGGAAGAGAATAATTCGGCCCT  
TTAGCAAAAAGACGCCATATATGTACTAAAAGAGGGGGAGCGGGGGGCAAAATAACCTCTAACG  
TGCATCTAGAAGAATCTAAAAGAATTGCTTTTAAAATAGAAA  
AAAAGTGAAGAA  
CCCTTATTGGAAGA  
TAAAAGGTAGAGACTTCTCCGTCAAGAA  
TTTCATCATTAGATTACAAGCTGAATTAGAAGGCGAGATTA  
TGGAAATGGATAGCAAGAGAGTACAAA  
AATATTTTATCGTTTTCTTTAAA  
AGGGGATATGGATGCTGTGAC  
GGTTCCTGCTTTAGAAGAGTTTCTAA  
CAAAATCCATTGCAAAAGGACGTGTTAATGT  
TTTGTAAA  
TATG  
GAGAAA  
GTTTTTTATATGAGTAGTGCAGGTTTACGCACACTGCTCTCATTAGCAAA  
ATTAACA  
CAAAATC  
ATAATGGGAAGCTTTGTATCTGTTGTCTTAGAGATGAAGTTGCTGATATTATTCGTATCGCAGGATTGGA  
TAAA  
GTAATCACCATCCGTAAAGCAGAACAAGAATCTTTAGCGATT  
TTTAAACTATGTCCTCATCATCC  
TCTTCGGGAGCTGCAACTGGATTCGCTGTATGTTCCGGATCCGCAAA  
AATCTTTTCAAAAATGTTTAAAGC  
GGACAGTGATTCTGTTGGCTGGGCCAACAGGATCTGGTAAAACAGCGTTTCTCTAAA  
ATTGGCGCCTCT  
TGTGGACGGAGAGATTATCTCCGTAGATTCTATGCAGGTGTATCAGGGAATGGATATTGGAACAGCAAAA  
GTTTCCCTAGCAGACCCTAAGGAGGTTCCGCATCACTTGATAGATGTGTGTATGTCCTCAAGAGTCTTTTA  
ATGCTGTTGATTTCTATTATCATGCAGTGCAGGCATGTCAAGATATCTTGTGCGGTAA  
TAAA  
GTCCCAT  
TCTCGTAGGAGGGCAGGTT  
TTTATTTCCATACTTTTCTATCAGGTCCGCCATCTGGGCCCTTCTCCAGAT  
TTTGTATTGCGGGAGCAGCTTACATTAGAAGCGCAGGAACGAGGAATAAGCGCTCTATATCAAGAATTAG  
AGCTTTTGGATCCTGTTTATGCAGCCACTATTACCAAGCATGATAAGAA  
TAAA  
ATTATTTCGTGCTTTAGA  
AATTATTCGAAA  
AACAGGGAGTAAGGTATCTAGTTATGCCTGGCAATCTACCGTAAATGAATCAAA  
AGAG  
TATCATTTGTCGGGGGTGGCTTTTATCTCCAGATCCAGAGTTATTGCGCCATAATATTTTGAACGATGTG  
ATCAGATGTTAGAAGAAGGGCTTTTAGACGAGGTGCAGGCTCTTTTAGCTGCTGGGATCAAA  
GGGAATTC  
TTCCGCATCACGAGCAATTGGATACAGAGAATGGATAGAGTTCTTGGATTTAGGAAGCCCACCAGACTTA  
TTTGTAGATCACGAAGCAAAA  
ATTTATACCAATACGTGGCGTTATACTAAGAAA  
CAGCGTACCTGGTTTAA  
AGAGGTATTC  
TTTGTTTAGAGAACTTAGGCCATGGGGATGACTCTGGATGATATGGCAAA  
GAAGATAGC  
GCAAGACTATTTTCTTTGTGGGTAAA  
TCCTCATCTAGCTAAA  
GAGAGCGGGCGGTAAA  
AGGTATCTCGTT  
CTACAGGAGTAAATCCTGCTTGAAGTAGCATTGCGCAGATCTCCTTCTCAGAGCTTTG  
CAGATCCCAGCC  
TGTGCA  
TTTGTGGACACTTTTCATCAAGTATTGTGCCACCGAAGTCGTGCGCTCCA  
TAAA  
AGAGTCCCTTA  
ACACCTCTTCCCTTCCCTCCC  
CAAA  
CCATGATGCTGCGATGTGGTCAAA  
ATTATCTAAAA  
AAATCTTG  
CCACCGCAAGAATGCGGTAATAGAGTTCCGGGAGACGCTTGGTGAGGGACGCGTCTCCCTAGTGTGTATT  
ATTAGGTTTATAACTCCAAGGGATGAAGCTAAA  
AAATCCAGGATTCATCTTGCATCACGAAGAGTT  
GTAGATGTAGCAGAATATCTTCTGGC  
TTTCTACATGGC  
CAAA  
CATCATGGTTGCTGTTGAACGGAATC  
CTAAGCGATGAGCGAGTTTGTGGAATGTATCCAGCCATCCGGCCCCATTTT  
TTTAGGAGATA  
TTTGTTC  
CCGAATTC  
TTTCAGATAAGATTTCCGGCTCCTCCTCCAGGAATAGTGCCTGACCAGCTTCCCAGAGACGT  
TC  
CAAA  
GCTTGTTCGGTAGAGATCCCCGATATTTGAGCAGCATGTGCGATTTCTACTGCAGAAA  
AAAAGT  
GCGGGTGTAAA  
GAAGGAAATTCCTTT  
TTTGTGATGGAACTAGAGTTTCTAAGTAGTCAATGCCA  
TTTG  
TGGATGAACCTCCTTGTAGCAAA  
ACGGTTTGTATGCCAGCTTGAACATAGCGCTGCATTAATGTGCGG  
AATTCATCAAA  
GGAGAGTAGATAGGCATCGGAAGAACGCGGT  
TTTCTGTAAA  
ATGCGCAAA  
ATGCACAA  
TCTATTTTACAAA  
TGTTTCGTGTAGTTAGGATTAGCATCAAGGACATAGGTAATAGTATTTT  
GAGGGTAGCG  
TTGT  
TTGCGTAATGAATCTGCATGGATTCAAGCTCTTCCAAGGGGAA  
TAAAGAAA  
AAGGCGGAGTCC  
TCTGGAACGAAGTCTTGTGAGATCCCA  
TAAA  
ACCGTTGACGATAATGCATGCCAGAGCAAA  
CTT  
GACTACCAATTGTTTTTT  
TTTGTCAAGACTCACACTAACCAATAGTTATCATATGGATATTCAGAACAGG  
GCT  
CAAA  
TACACCAGAAGTAGAGCAAGCAGCTTGTGCAATCAAGAAGCGGCA  
GAAA  
ATGATCGTGTAA  
AGATAAGCTCTCTTCTCAGAGATCTCAGCAGAAGCTGTCCAGAGTTGCGAGTCAATGGAAGCTTTT  
GAG  
CAAGTGGTTGCAGAACGCAGCTCAATTGAAGAAA  
AGATTTTATTTG  
CATTAGAGCAGATGGGAGCTTTG  
C  
TAAA  
AGGTGCGGATCAGAACAGCGA  
TTTGAAGCTGTTCTGGAATGTGA  
GAAA  
GT  
TTTGTCTACC  
TTTATT  
CCAGCAGTTGGAGGATCCTGTTACGCGAGCCAATC  
TTTGGGGCGTTACACTGAATTAACAAGGGAAGGG  
CGTTATATCAAGACTTTG  
CAAGATGAAGAAGGCGCTTTCCTAGTAGGACAGATTGAGCTGGCTA  
TTTCTT

GTTTGAATCTGGTGTTCAGGGATTTTTCTCAAAAACAGAGAAA GAAGAGATCTCTGAGGAGGATCGAGC  
TGCGTTAGAAAATTCCTAGTTTGCTGCACATAAA GATTTCTATTTGCTCTACGCATGCAGATCTGCGCTGG  
TTAGGAAGTTTCTCTTCTCAAAATTATCAATTTGAGAAAAGAGCTTATGAATATTAGCATGCGTATGCGGC  
TGAAAAGCCAGTTTTCAGAAGTTATCCGTTTTAGGGAATAAGGTA TTTCTCTGTA GAAAAGAATTAAC  
CGAGAAGGTGAGCGAACTA TTTGCTCAAGATGTGGAAGCTTTTGTA GAAAGATATTTTCAAGAGCCTCT  
AGAGAGTCTCTTAAGAAGTCCGCTTTTCTTAA GAAAAGAAA TTAAGAGATTGCAGCAGGCTGCTAAGT  
ATCTATCTA TTTCTTCTGGAGTTT TTTCTTTCGACACGTTTG GGGACTGAGTCAGTGTGGGATCAGCTTAA  
AGGCTTAGAAAAAGAA TCCGCCAGGAA CAAAAGCCGTTTG GCTGCTACTTCCGCTGAGAATATGAAGGAA  
GTTCAAGGGCGTTTAGATCAGGTAGAAGTCCTTTTACAGGAGAACGAAGAGGTCCATAAGATCCGTAAGG  
AGATAGAGGCAATTTCTAAA CATATTCGAGGAATCTCTCTGGTTCATGATGATGTTGTTCTATTGAAGGG  
CCGTATTCAGAC TTTGTTAGGAGAGGTCCGAGAGAGAGAAGCTGTCATTGA GAAAAGAA TGAAGGAGTTG  
CAAGC TAAAGCAGAGCAGGCTAGGGCAGAAGCAATTC AAGCACTG GAAAACGAAGTG CAAAG TTTCTGTG  
ATCAATGTAATGAAGGAGATCTTCTGAAGGGGC TAAAGAGCGTTGTCAGGAGCT GAAA GAAGCTGTGAA  
GAAGATGGCTTATCTGCCTTATGCGAA GAAAGTAGC TTTGGATAAT CAAATCAACGCTGCGCAGAGAAGC  
GTTCTTGACGGCTAGAAGAA CAAA TGCTAGCTTGTCCAGAT GAAA AAGTAT TAAA TATGCGGCAGGTTT  
TGGAA CAAA GAATGCTGCGGCG TAAAGAGCT CAAA GC TAAATTTG AGTGTGATAA GAAAT TATTAGGGGG  
ATCCGCTCGAT TTTG ACCGTGC TTTG CAGTATAGTGCTATGGT GGAAGAGGATA GAAAGGCCCTTGAA  
GAGCTTGATGCAGCCATTATCGAGTT GAAAAGAC CAAA TACAGCAG TTTGTTTAAA AGCTGATAATGGAGG  
AG TAAA AACAAGTAGT CAAAAGGTGAAGAGCCT TTTGGCTATTTTT TTTAAA TTGT TTTAAA GAGTGGCA  
ACTTAGGACTG GAAA ACATCTATGTATACAGCGTATCCTAGATGGTTAGGTTTG TTTCTACTACAGGTT T  
TTATGTTTCATGATGAGAACGATCG CAAAATGTTGC GAAA AAAAGCCTTAGCTCT TTTGAAATAAA AATATGT  
CCATAAGGATAGCAGAGAAGTCTAATCTTGCTCTGGCATGGAAGTTAGCTTGAGTACGGTGACTAGGTT  
TTTGAGAAA GCTCTT CAAAGAGTAGGGATCTCGTAGAG GAAA GAGGCTATT TTTGG TAAA GAATATCC  
ACGAGAGCTAGGGCT CAAAGGGATT TTTCTCTCTA GAAAAAAGCTCGACCTTATCTTAGATAATCGGTT  
ATTCCTAGGCCAGT TTTATGGATTCTG TTTGTTTAAATTTA TTGAAGGTAATTGT TAAAGCTATTGATAA  
CAAAA AAGGCCGTAACCCTGTTGT TTTAGACGTT CAAAACATTTCC AATTAACAGATTAT TTTGTT TTT  
GTTGAAGGGAACGTTGGGGTTCACAT TAAAGCTATAGCTGACACAATTATAGAGGAGT TAAAAAAC TAA  
AAGTCTATCCATTGAATGTGGAAGGACTTAGTCATAGTGATTGGGTTGTTATTGATTACGGATTTA TTGT  
TATCCACTTA TTTGTTTCTTCGGTACGAGAGCAGTATTG TTTAGAGAATTGTGGAAGGACGGAGCAATC  
ATTACGCTCTGATTGTCTAGCTTCT TAAAGGAGAAA GTATGAACAAA AAACGTGTAGTCGTTACAGGAATG  
GGGATCGTCTCCTGCCTTGGGAATGAAGTAGAATC TTTCTATGATAGCCTGTTGGCGGGAATTAGTGGAG  
TGCGAACAAATCACGTCT TTTCCCTGCGATGATTATGCTACGCGT TTTGCTGGCTGGATAGAAGAA TTTAA  
CTCAGAGCCTTACTTAGA TAAAAAACAAGTTAGACGAGTTGATCCT TTTA TTTACTTATGCAGTTGTAGCC  
G CAAA GAAGGCAATAGCTATGTCCGTTGGGATCAAGATACTCTCCCGCAGATTCTCATCGTTGTGGGG  
TGATTATTGGTTCTGGAATGGGAGGATTACGAACCTGGATGAGGGGATT GAAA AACTATCGGCTG GAAA  
TAGAAA ATTATCTCCATTC TTTA TTTCTTACATCATTACGAATATGGCTCCGGC TTTA ATCGCAATGGAT  
TATGGGTTAATGGGACCTAATTATCTA TTTCAACAGCCTGTGCAACAGCCAAC TACTGTATTGATGCCG  
CTTATCAACACCTCATGAGGGTCGAGCAGATGTTATCG TTTG TGGAGGAACTGAAGCGGCTATTAACCG  
TGTTGG TTTAGCTGGA TTTA TTGCGAATCGCGCATTTGTCAGAAAAGAAA TGATGCTCCAGAACAAGCTTCG  
CGCCCTGGGATAGGGATCGAGACGGT TTTGT TTTG GGGGAGGGCGCAGGAATTC TTGT TTTGGAAA CCC  
TTGATAATGCT TTTGAAA AGAGGGGCTCCGATT TTTG CCGAGGTA CT TGGCACATA TAAA ACGTGCATGC  
TTTTC ATATTACTGCTCCTAGAGATGATGGCGAAGGAATCACTGCCGTATAT TGGGAGCCTTGAATAAG  
GCTGGGATTCC TAAA GAACGGGTGAATTATTAATGCACACGGAACGTCGACGCCCTTAGGGGATCTAT  
CAGAGGTATTGGC TTTGAAGAAA GCT TTTGGAAGCCACGT CAAA AACTTGCGAATGAATCAACGAAGTC  
GTTGATAGGGCACTGCTTGGGAGCTGCAGGAGGAGTAGAAGCTGTTGCAACCATTC AAGCCATCCAGACT  
GGGAAGTTGCACCCAACAATCAATGTA GAAA ATCCGATAGCAGAAA TAGAAGAATTCGATGTGGTTGCGA  
A CAAA GCTCAAGAT TGGGATGTGATGTAGCTATGT CAAATTC TTTG GTTTTG GCGGACACAATTC AAC  
GATATTAT TTTG GAGGTATGAACCTTCATTATGAT GAAA ACTAAGCAGCAATATTC TTTG GCGTTATTC  
CTATCAGATTT TTTG TACTCCGGATAGAAGTACCT TAAAGGCTTGT TTTA TCTGCCATACAGATGG GAA  
ACATTGGGG TTTCCCTAAGGGGCATGCTGAG GAAA AAGAAGGCCCTCAGGAAGCTGCTGAGAGAGA ACTT  
GTAGAA GAAA CTGG TTTG GGGATTGTTAATTT TTTCCAAA AATA TTTGTG GAAA ATTATTC TTTA ATG  
A CAAA GAAGAAA TC TTTG TGCG TAAA GAGGTA ACTTAT TTTCTTGCAGAGGT TAAA GCGGAAGTACATGC  
TGATCCTGATGAGATCTGTGATGTGCAGTGGCTAAGC TTTCAAGAAGG TTTACGCCT TTTAAATTTCCCA

GAAA TTCGTAATATTGTTACGGAAGCAGATAAAATTTGTTCAAAGTTATCTATTTGCTTCATAAAATGCC  
TAGGATGAAAAAACTTGGTTAGGAAGGGCCGTTGTGGAATCTCCACAACAGCCTTTTCCTTTTCGTGC  
GATTTACATAAAAAGATTGCAATAGTCTTCGTGAGCAAGACGAATGACTTTTGGAGCTTCTTTTTCGCG  
TATAAACCTACAAATTTCAATTTTAGCTGGTTTTGCCTGAATTAAGCTTTCTGGAGTAGCTTTATAGGTTA  
AGAAA TAGTGTTGGATCATGTC CAAA ACTGTGCCTGGGCATTCA GAAA ATCTTCTATATTGCCATAGAC  
TAAATCATCTTCTAGAACAGCGATGATTTTATCATCGGCTTCTTCCGAGTC TAAA ATACGAATCCCTCCG  
ATAGGACGCGCTTGAAGAGGATGTTCCCTTGTGTAATATTTT TTTCCGTTAACACACAGATATCAAGAG  
GATCGCCATCGCC TTTGATATTCTCTCTGTTAC TTTGTTGACCCTGTATTCTCCA GAAA GATCTCCACA  
ATAAGTCTTAGGTAACAGCCGTATAAGCAAGGACAAAAGTTA GAAA ACTTTTGTTGGCCGATCCACTTTT  
AGGATACCAG TTTCTTTATCCAGTTCGAA TTTAACGGAGTCGGCTGGAGTGATTTCTATATAGCAA CAAA  
GAGATTCATAATCATCGCGTGTAACTACTGGCCATGCCAAGGATGAGCTATGGATAATGGTGT TTTAGA  
CATAAGATCACTCTCTAT TAAA GTGT TTTATGCGCAATTATCCTGCGCATCCGGCTTATTTCGTCCAGATA  
GT TTTAGTCTTCTGTTCTCGCAG TAAA ACTTTTAT TTTATCGGCAGCC TTTCTTTTGTCTTTTATTCTTG  
TCATTGT GAAAAATGTT GAAAAGTTACTCGTGGCAATCC TTTCCAGACAGGTTT TTTGTAC GAAA GACGAG  
AGTGATTGTACTG CAAA ATAATATGAGCCGGACGTAGGATAT GAAA TACTC TTTGCAA TAGAAGACCTA  
CATATTGAAGGATATGAACAGGT TTTGAAA GTTACTTGCAGTCTGTACAGTTAGTTGCTGTAATTGCTA  
TTCATCAGACAAAAGTGGGCCAGCTTTTAGGAGGCATTCGTGCCCTCCCTTATCTTCAATTTGAGGATGG  
TTTACAAGATGCTCTACG TTTGT CAAAAGCAATGACATA CAAA GCTCTTCTCAGCAGTACAGAAA CCGGA  
GGCGGAAGAGTGTTCAT TTTCTTGG CAAAAGGGATGACTAGTCTACAGAAGGAATGCTGCGAGCT TTTG  
GGCAAGCTG TAAA CTC TTTACAAGGGAAGTACATTGCAGCCGAAGATGTGGGGTCTCTGTTTCCAGGATGT  
CATGATTATTTCGTGAAGAGACACCGTATG TTTGTGGTCTTGTAAACAGTCAGTGGAGACCCTTCTA TTTAC  
ACAGCTCACGGCGTGT TTTATGTATTC AAGAAA CTGCAGATTACC TTTGGAAA CCGATATACGAGGAA  
AACGTGTCGCTGTACAAGGGTTAGGAGCAGTCGGACGTAAGTTGGTGCATGAACTGTTCT TTTG CCGGTGC  
AGAGTTAATCG TTTACGACACAAG GAAA GATCTTCTCGATGAAGTAGTGAC TTTATATGGCGCCCAAGTG  
GAT GAAA ATATCATCTCTTCGATTGCGATATTCTATGCCATGTGCCCTTAGGTGGAATTATTAATTCGA  
TGAGTATCGATCAGCTGCGATGTCGCGCTATTGTTGGAGCAACCAACAATCAATTA GAAA ATCTGCTAT  
AGGCAGAGAATTGGTTGCTAGAGGGATTCTTTATGCTCCAGACTATCTTGTAAACGCAGGAGGCTTATTG  
AATGTCGCTGGTTCCGTAGGGCGAGCTTATTCGCC TAAAGAAGTGTAAAGCAAGGTGGAAGGCCCTGCC GA  
AAATACTTCG TAAA TTATACGAACAAGGGCT TAAAGAAA ACCGAGACACAGGGACGTTGGCTGATGCTAT  
AGTTGAAGAGCGCTTAGCTG TTTATGCTTAGTAGCAGAGACATGAGTGGCAAGGGGGAGCATGT TTTGAG  
TAGCTTGGTGACGTAG TTTGTATAGAGTCTCTAAA ATCGTGCTATGCA TTTGCTCGTTAGCAGAAGCAAG  
AAT CAAA GGATGTCTATCTAGATA TAAATTTG GATTA GAAA AAGGGAGAGGATCCCCGATATATCTGTA  
ACGAGGCCCTCAGCTTCTTCTATAA GAAA CACACCGGGAGCATGGTCTCTGTAGTGGGCTCGTGAGGGG  
AATACGGGATGCGAATGAAGAAGTCTACCGTATTATCTGCAACCCAAGCGTATTTGCATTGACTATCTGC  
TCGGATAGGCTGAGGATCCAAAGGGAGGTG TTTACTGAGAATATGTGTAGCT TAAA GTTTGATGG TTTCTA  
GCTGATAAGGAGGCTTCACAGAA TTTACAGGTAGGCTG GAAA TCTTCGTGCAGGGAGAAGGGGAAGGAAT  
GGGTAGGATTA CAAA TCGTAAGTCCTTCGCC TTTGCTGCCGAATAGAT TTTGAAA GAGTTATT TTTAGA  
AGAAGGGCAAGCGATAACGGAGAGAACAGGGGTATGTTCTG TAAA ATAGAGAAA GAGCGATGGC GAAA CAA  
CGTTG TTTGATGAATCCCGAAGTACCGTCGATAGGGTCCGTTAAC CAAA ATAGTGAAGAGTGGGAGC TTT  
CCGGAGAGAGGGCCTGATA CAAA TCTTGACAGGAGAC TTTGGGATCGAGCTGCTGCG CAAA TTGTAGGAT  
TTGAGGGATCCTAGGGTGATCCGTGGCAGGATTGAGAG TTTCTTCTCCGACCAGCGGGATATGCG GAAAT  
AAA GATGTCAGTT TTTGG TAAAAATAATATTGGATAGCGTAATCAGCGGGAGTAACGTATGTCTGGTCAG  
GCTT TTTCCAAA AGGGAATAAATTTATGAGCT TTTCCGATAGCGCATCAGTGACAGCATAGCCTGCATGAC  
AACTG TTTCCGCAGCTTT TTTGGCAGTCATTGAGGAGGGAGAACAATAAGCT TTTCCGCTGGTTG CAAA GAG  
GTAACAATCACTCACTATAGGGAGCGAATGTTGCTGTAGTGAGAGGACATCCTAACAGAGAGATAGTTT  
CTTAGCAAGAGCAGAGCTATTGTAGAGTTGCG CAAA TAACTTTGGA TTTCTGTAAA GATTATTAAC GAAA  
ATATGAAGCCACGATATCTTTTGTATAA TAAAT GAAA AGAATAGTCTTTTTCAGAATG CAAA CCTGTAA  
TTTG GATATG GAAA TATTGCACTC TTTG GTGCAAGAATAAT TTTAATAA CCAAGAGGAAGTATGAAGAT  
AGGGT TTTGGCGTAGACTGTATGAGGTGTGTTATACTTCTCTTATAGGGTGGCG TTTGAAA CTTGCTAT  
CGTGTATTAGTCGAAGGGATAGAGTCTATTAACCAGAATCCCAGAAGGGAGCTTTATTCTTTCTAATC  
ATGTAGCAGAGATAGACCCTGTCAT TTTAGAGCACGTGT TTTGGT TAAAGTTTCACGTGCGACCTATAGC  
GGTAGATTA TTTA TTCAATAATCCAGTGGTAAA ATGG TTTCTTGATTCTGTAAGAGCCATCCCTGTGCC  
TCCGTCGTCCTTGAAGGGATGATAAGCG TTTGCTT GAAAGGATAGAGCGCT TTTATGTATGCGTGACCC

AAGCGCTAGATCGTAAGGAAAGCTTGCTTC~~TTTA~~TCCATCAGGACGATTGTCTAGAAATGGGAAAGAAGA  
GATCGTTAATCAGCAGGCAGCCTACACTAT~~TTTG~~CACCGGGCGAAGGAATGTGATGTATTCTTAGTTAAG  
ATCACAGGAC~~TTTG~~GGGAAGTTCT~~TTTC~~ACGCTATAGAACAGGAAGCACAC~~CAAA~~ATTAGGTAAAGTGT  
~~TTAAA~~GAGGCGGTGAAAGCCTTGTTGCGGTGCGGAAT~~TTTC~~TTCATGCC~~CAAA~~CGCGAGGTACGGG~~TTTC~~  
GG~~TTTG~~CCCTGCAGATTACTCGGTATTGAAGCAGTTC~~CCCGA~~~~CAAA~~ACAAGAATCAATACT~~TTTC~~CTCTCG  
GATTGG~~TTTA~~AATCAAGAGGGGGGGGAGACTCC~~TTTA~~GAGGTCCCC~~TACGCATAGGTAAGAGATGCGAGAT~~  
AATAGGAATACAGCTAGAAG~~TAAA~~CGCG~~GAAA~~AATACGATCAG~~GAAA~~AAACCGT~~TTTA~~CGCAGTTT~~TTTG~~A  
AGC~~TTTG~~CGCAGAGATGACTACGGCGACGGTTT~~TTTG~~GGATGAGCAACTTG~~GAAA~~GC~~TTTC~~CTACAATCA  
AGTGTATAAGGCTG~~TTTG~~TGC~~TTTA~~GCGACACG~~TTTA~~G~~CAAA~~TTATCCTGATCAGCATATTGGAATTATG  
ATGCCCGCATCAGCAGGCGCCTATATTGCTTAT~~TTTG~~CAACGCTTC~~TTTC~~AGGGAAGATTCCAGTGATGA  
TTAACTGGAGTCAAGGGTTGCGAGAAGTAACGGCGTGCG~~CAAA~~CCTGGTTGGTGTGACTCATGTGATTAC  
AG~~CAAA~~GCCTCTTATGCA~~GAAA~~TTGGCGCAGACGCATGGAGAAGATGCAGAATATCCTT~~TTTC~~CCTAATT  
~~TTTC~~TAGATGAGGTTCTGTAAGGAATTATC~~TTTC~~CTAGAGAAGTTCGAGTGGGTA~~TTTG~~CATGTCCATAC  
CT~~TTTG~~AATGGATGATGCGCTGGTTCGGAGTGT~~TTTG~~A~~TAAA~~GACCC~~TGAGGATGTTGCTGTCATTCTGTT~~  
CACGTCAGGAACCGA~~GAA~~ACTCC~~CAAA~~AGGGTTCCCTCTTACTAATGCCTCACTACTTGTAAATCAACGG  
GCCTG~~TTTC~~GATTGCT~~TTTC~~TCC~~GAAA~~GAAGATGATGCAATGATATCCTTCCCTCCCGG~~TTTC~~CATGCGT  
ATGGGTTCAATTCTTGTACGCTG~~TTTC~~~~TTTG~~CTATCCGGGATACCTGTTGTT~~TTTG~~CCTATAATCC~~TTT~~  
~~G~~TATGCGAAG~~GAAA~~AATAGTTGAGATGATTGATGAAG~~CAA~~AGGTCAC~~TTTG~~CTAGGAAGTACGCCTGT~~TTTC~~  
CTCAGTTATATTATTAATGCTGCTAA~~GAAA~~AGCGAGACCACGCTTCCCTTCCCTGCGGTTGTTGTTG  
GAGGAGATGT~~TTTC~~~~CAAA~~CACTC~~TTTA~~TATCAAGAAGC~~TTTG~~~~GAAA~~AC~~TTTC~~CCACATGTTCAACTGCGTCA  
AGGATATGGAAC~~TACAGAATGCTCTCCGGTATCACTATTAATACTGTGAATAGTCC~~~~GAAA~~CATGAGTCT  
TGCGTAGGCATGCCTGTTAGAGGTATGGAAGTGTAAATTG~~TTTC~~TGAAG~~GAAA~~~~TAAA~~GTCCCTGTATCAA  
CCGGAGTAACAGGATTGGTCTGACACGAGGAAC~~TCTCTATTTTAA~~GGATAT~~TTTG~~GGAGAAGACTTCGG  
ACATGGATT~~CATAGAGTTAGCTGGAGAGACTTGGTATGTCACCGCGACTTGGGGTATGTAGATCGCCAT~~  
GGGGAGTTATTCT~~TAAA~~AGGACGACTCAGTCGT~~TTTG~~TGAAGATTGGGGCAG~~GAAA~~TGGTTAGCCTTGAGG  
CCATGGAGAGTATTATTATGGAAGGATGTGGG~~CAAA~~ATGCTGCCGATCATCCT~~TTTG~~GTGG~~TTTG~~CGGCCCT  
CCCAGGA~~GAAA~~AAGAGCGTCT~~TTTG~~CCTATTACGATATCCCAACTTCTG~~TTTC~~GGAAG~~TAAA~~TGATATC  
C~~TAAA~~AAACTC~~CAAA~~ACCAGTAACTTATT~~GAAA~~AT~~TTTC~~TTATCACCATCAGGTAGAAGCGATTCCATGT  
TGGGGACGGG~~GAAA~~CCTGATTACTGTTCC~~TAAA~~TGCT~~TTTG~~G~~CAAA~~ACGATTAT~~TTA~~GCGAATAAGGACT  
GCTC~~TTTG~~AATGATTATAGCTATGAGG~~GAAA~~TGGGT~~TTTG~~AAGGAAGCTC~~TTTC~~TATTGAT~~TTTA~~TCACT  
AATGAT~~TTTC~~CTGGGATTCTCTCG~~TTTA~~GATAGCTTAGTT~~CATGCTGTTGAGGCTCGTTATCGGC~~~~TTTA~~ATT  
GTAGAGACAAGCCTCATGCGCAGTTAGGTTATGGAGGTT~~CGCGCCTATTTTA~~GGCTCTTCCCTCGTGT  
AGATGGGGTAGAGCAT~~CAAA~~TAGCGCAC~~TTTC~~ATGGCGCTCCAGAAGCTCTTAT~~TTTG~~CCAAGTGGT~~TTT~~  
~~G~~TTGCGAATACTGCGA~~TTTG~~TGCGCATCTATCTTCCGTAGCGGATTATGTGCTATGGGACGAGCAGGTGC  
ATATCTCCG~~TTTC~~TTACAATCTATCTGTTTT~~TTTG~~TCGGGGTGGCATCAGAG~~TTTC~~CGCCATAATGATCT  
GGATCATCTAGAGTCT~~TTTA~~ATTAGAATCTGTGTCAGCAACGTGGT~~TTTC~~AACGAGTAT~~TTA~~TCCCTCGTCTGT  
TCTGTCTATTCT~~TTTA~~AGGGTCT~~TTTG~~CTCC~~TTTG~~GAG~~CAAA~~TAGTGGCATTGTCTCATCAGTATCACG  
CTCAGTTGATAGTTGATGAAGCGCATGCTGTGGGATTA~~TTTG~~GAGACGCTGGGAAGGGAT~~TTTG~~TGCCTC  
GTTAGGGTAT~~GAAA~~ATT~~TTTA~~TTCTGTACTCGTTACCTCAG~~TAAA~~GC~~TTTG~~GGATCCGCGGGTGCAGCT  
TGGTTATCTTCTTGCATAGGAAGCAGGAT~~TTTG~~AT~~CAAA~~GAACCTATGGTAAGTCT~~TTTC~~TACAGGAATAC  
CTCCCTA~~TTTG~~TTAGTATCTATACAAGTTGCATACGAAT~~TTTC~~TCTCACAAGAAGGAGA~~ACTTGC~~GAGAAC  
ACGATTACGTGCTATTCGTGACTAT~~TTTG~~CT~~CAAA~~AAATCTCTTGGGCAGCAGCTGGA~~TTTG~~TGCAACCG  
CTCTCTCTCCCTGGGATCTCTGAGCAGGAATTGTAT~~CAAAA~~ATTAGTTGCCACAGGCATTCTGTGTTGGAG  
TCGCTTGTCTCTCTACAGG~~TAAA~~GTACTGCGAGCCAA~~TTTA~~CATGC~~TTTC~~CAATACCGAACAAGAAGTAGA  
TAT~~TTTG~~~~TTTC~~GTTGCTTGCCACGGAGCAAGTAACGTATCAGAAGAATGTCGTAACAGGATCTACATCA  
ACAATGCAACGCAC~~TTTA~~GAGGACAAT~~TTTG~~CAGCGGCTAATGCCCTTGAATCTG~~TTTA~~ATTCGCCACGA  
GGATGTTGCGAGT~~TTTG~~GATTA~~GAAA~~TTGATAGT~~GAAA~~TAAGTCT~~TTTA~~C~~TTTG~~~~GAAA~~TGTCCACAAGGAGA  
TAT~~TTTC~~CATAAGAGAGGCTTGAGAATC~~CAAA~~TTTGT~~TTA~~ATCAGTGTGTGTACACGCTGAG~~TTTC~~~~TTT~~  
~~AA~~AGTATAATCCGAGCAT~~TTTC~~CAA~~GAAA~~AAATACAGCGGATTAGTCGTGTGAACGGAGGATAGTTACATA  
CT~~TTTC~~TCCCTAAGATCTCTTCCCTGTAG~~GAAA~~AGCTGG~~GAAA~~TCTTGTGCTAAGGCATGAGATATAGTCGA  
GT~~TTTG~~AGGAAG~~GAAA~~TG~~TTTG~~GATAAGA~~ACTTCTCCTGGAAGGTGGCTGCGTCTGAGCGTCCAGTGACT~~  
TGAGTAATCAGTT~~GAAA~~GA~~ACTTGTTCGCTGCTC~~~~GAAA~~ATCTGGGATATATAGACCAGAGTCTCCGCT~~TA~~  
~~AA~~ACTACAG~~GAAA~~GAGTCACGGCAG~~GAAA~~AGTGCATACCT~~TTTG~~CAATCA~~TTTG~~TGTGCCAATAAGAATATC

GGC**TTTC**CCTGTAG**CAAA**TTG**TTTA**AC**TAAA**GCATCATGACTTCCGCGGAATCGTGTGGTGTGTCAGAATCT  
AGCCGTATAGTGC GGGCTGTTGGGAAGAATTCTCGGAGAAGAGTCTCAATTT**TTTC**TGTTCCAGTGCCTC  
GGTATTGAAGTGT CATAGTGCCAGGCATTGAGGGCATGAGGTAATGGGC**TTTG**AGAGGCGGGTGTG**CA**  
**AA**GGTGACACAAGAGAATCCGCTCAGT**TTTGT****GAAA**TGTCAGAATCATGT CACAATGAGGACA**TTTC**AA**G**  
GTGTACTTACATGATGAGCAGGATACATTAGTATGGAATCCGCGACGATTGAA**GAAA**ATAATGGTCTGTT  
CTCTACTTCC**CAAA**CGTTGCTCGATGCTCCGAATGACCG**TTTG**AGAGAA**GAAA**GGCTT**TTTC**CGAGTTT**T**  
**TTC**TATCTCCAAGTTCATGTGATA**GAAAGAC****TTTA**GTAGGAGTAGACGTAGAAGCTCTT**TTTG**AGAGA  
ACG**GAAA**GCCTGTA**TTTC**TTAGATAAGGC**TTTG**TGTAAC**TTTCTAAA**CTTGGAGTGGCGCTACCTAGGA  
TGACTGTAGCATTGGTCAT**TTTC**CCTCGCATGACAGCCACATCTCGAGCTTGA**TAAA**AAGGAGG**CAAA**TC  
GC**TTTGT****TTTA**TAGGCGCTGTCGTGCTCTTCATCCACAATAATGAGTCCTAAGT**TTTG**TATAGGACAG**GAAA**  
ATGGCGGATCGAGGGCCTATAATGATGTTAATTAGGCCTCGAGACGCCTTGTGCCAGGTCTGTGTACGTT  
CACTGTCACTTAACTTGTAGTG**TAAA**ACGCCACTTCGGAAC**CAAA**GTGCAT**TTTAAA**AAAG**GAAA**CGGT  
**TTG**AATGGT**TAAA**GCTACCTCAGGGACAAGAAGAATCACGCTCTTCC**TAAA**GCTCTAGCT**TTTG**CGAATG  
ACTTGCAGATACACTTCAGT**TTTC**CCGCTCCCTGTCACTCCGAATAGCAGACAGG**TTTGAAA**TTGTTCCG  
CAACGAGCGATTGCGAGATGGTATTGATTGCATCTAGTTGTTCTTGATTGAGTGTGGGGTCTCTGGGAG  
**GAAA**TAATGGAGTTGTTGCTCTGG**TTTC**TAGATCTGCTGAGTCGACAATGCGAATGAATT**TTTG**TTTT  
**ACCA**AGGCATC**CAAA**GTT**TTTG**CAGATACCTCTGTT**TTTC**TCATCAGCTCAGGGGGAGTGAGAGGC**TTTG**  
TCGT**TTTG**AGTAG**TTTA**CGCAGAACAGCG**TTTG**CTGTGGGTATCAAGCGT**TTTG**AGTAT**TTTC**TTGTGT  
ACGCTCTGCAT**TTTG**CCC**TAAA**AAATACATTGTTCTGATGCTTAGTTGAGTGCG**TTTG**CGCGTATACCGTG  
GGTAGGAATAAGGATACGGCGCTTCCAGAGGA**CAAA**AGTAATATTGACTGATC**CAAAA**AAAT**CAAA**TCGA  
TAAGGTCTTGGGAAGGGTAATGCCTTCATAACTGATATC**TAAA**ATAGGCTGGATTACATGAAC**CAAA**ATC  
AGAAGA**ACT****TTTA**AT**TTTG**AGCACAATGGCAAT**TTTA**TAT**TTTG**TCA**TTTG**TCAGT**TTTC**TTTG**CAG**GGGA  
ACCTTAACAACAGATCCTACAGTTACTAGGT**TTTC**CAATTCAGCAGGAATGCCGTAGTCTAGGAT**TTTT**AT  
TGATA**TTTG**CATTGACTATGACTTCTGCATAGAGCG**GAAA**GGCTGGTGAGTAGGTCCATA**AAA**TCTCTT  
**TTTA**ATGCTGAATCTT**TTTC**CATATTGGGAAGAGGAA**TAA**ATGGGTATGCAGGTTACT**TTTT**ATCGTG**CAAAA**  
CAGGATCGTGATAGTTCACTTGCGAATT**TTTA**TACCTGATTGTTGTAAGGGCGC**TAAACAAA**AAGGATG  
AGGGGAATGACT**TAAA**ATCAGAC**CAAA**GTTTT**TTTG****TAAA**AAAGAACGAGGCGAGTAG**GAAAA**AT**TTTC**TGT  
**GAAA**GAAT**TTTA**GCTAAGCGAT**TAAAGAAA**AGAATCTCATGTTCTGAGATTCATGGAC**CAAAA**ATGCCAC  
ATGAGGCCCTTGCAGGTCGTTGAATATAACGT**TTTAAA**GCAGGATAAT**TTTC**TTT**CAG**TAGTTCTTCATG  
AGAGAGTCCAGGG**TAAA**TAGGAACACAGGCCAGGAGTG**TTTG**GATTC**TTTA**GGATGGGAAGGTGGGGGA  
ATAGAAGTTGTAACAGGGTCT**TTTG**GGAG**TTTC**TACCGGAAGAGCTTGCGGTCTAAGCCTGGGGGATTAA  
GAATAGGAGCCGTGGATGGAGATAAGTCCCTCG**GAAA**AGGTAAGAGGTTCTTCTG**GAAA**ATATAATGGGAC  
CAGTATAGACGTGGCGGGTAGGGCT**TTTC**TGTGTAGCGAT**TAAA**AA**TTTC**TT**GAAA**AACAGTAAGTGAA  
TGCATGGCGTGTCAACAGGTGCACAGGTTG**TAAA**GAGAGACATTGTTCCGGAGGGATAAGGTTATCAGCC  
CAGACGAATTCATTGCAATCCACGCATCATTGTTATCATAT**TAAA**GGCTAGAT**TAAA**GCAATTCCTTACAA  
T**TAAACAAA**GAGAG**GAAA**ATTATGA**GAAA**CTGGTTATTAGGGAGCTTGCTCATCGCATGTATGGCGGTCAC  
AGCTCCTTGT**TTTG**CTG**CAAA**ACGTCGTGCTGCGGGTTCGCAGAAGATCAATAGGGTTGCAGAGACCGGA  
ATTCACTGGATGCTTATCAAGATGC**TTTGA**ATAAGG**CAAA**ACAGGAAG**GAAA**GCATGTAGCCGTATTT  
**TC**ACAGGATCCGATTGGTGTAT**TTTG**GTGTATGAGAATGCAGGATCAGAT**TTTACAAA**CAGCTGCAT**TTTC**  
CGAG**TTTG**C**TAAA**CAATA**TTTG**TGTATGGTGGAGATAGAT**TTTC**CCTCACAA**CAAA**GAAC**CAAA**CTGCAGAA  
**CAAA**AAGAGCAGAATCGTCATTT**GAAA**AG**TTTA**TATCTGTAGACGGATTCCCTACCCTAGT**TTTC**CTCG  
ATTCCGAAGG**TAAA**GAAGTCG**CAAA**AAATGGGAT**TTTG**AGCCTGGAGGCGGAGAGGCATATGTT**TA**TAGAT**T**  
**AAA**GCAAGCATTACATATCTCCTGAGTACGCGGTAATTCTCTTT**TTTA**ATAAGA**GAAA**AAACGTGTTCC  
ATTCTCGGAT**TTTC**TAA**GAAA**GAG**GAAA**ACGATCCAGT**TTTC**CTC**TTTC**TAT**TTTG**GAG**GAAA**CAAGCTGCAT  
ATCCTCTCTCTT**CAAA**AT**TTTC**CAAG**TTTG**ATGTAGCATGATGAGTCTGCTTAAGACT**TTA**GTGATTGTC  
GTAAGAA**GAAA**AAATATGCTACTATT**TTTG**AGC**CAAA**GGACGGTTGATGTCTGTAGAAGTTGAATACTTG  
CAACACGAAGATTA**TTTG**TATAGAACAAGCAAGC**TAAAGAAA**TCAGAGAT**TTTG**GGCA**TAAA**TCCTTACC  
CTTATCAATACACTGATTGTCTTGAAGTACAG**GAAA**TTCGTAATCAG**TTTG**TAGATAACGAATTAGGAGA  
TAGCGAAGCGGCT**TTTC**G**TAAA**GAGACACCTAAGGTGCGT**TTTG**CCGGACGACTTGTCT**TTTC**CGTTCT  
ATGGG**GAAA**AAATGCT**TTTG**GGCAGATCCTCGATAATGATG**CAAA**GATTCAAGTGATGTTCAATCGAGATT  
**TTTC**TGCAGTGGCAGGGTTAGCCGCGGATGCTGGGAT**TTTC**CCGAT**TAAATTTA**TTGAGAA**GAAA**CTTGA  
TCTAGGAGACATCTTGGGTCTCGAAGGGTATCT**TTTC**TT**TA**CTCACTCAGGAGAATTAACGGTCTCGTT  
**GAAA**CGGTAACGTTGTTATG**TAAA**TCCTTAA**TTTC**TTG**CG**CTGATAAGCATGCAGGATTAGCAGAT**TAAAG**

AAA TTCGCTATCG CAAA CGTTGGGCAGATCTGA TTTC CTCAGAGGATGTGCGTAAGAC TTTC TTAACAAG  
AAGCCGATTCTTAAGTTGATTCGTGAGTACATGGATCAGCAGAGCTT TTTA GAGGTG GAAA CTCTATC  
TTG CAAA CCGTCTACGGAGGAGCAGAAGCAACTCCT TTTG TTACCACGCTGCAAGCGCTACATGCAGAAA  
TGTTCCTAAGAA TTTC TCTAGAGATTGC TTTGAAA AAACCTCCTGTTGGAGGAATGTCCCAG TTTATGA  
AATCGG CAAA GT TTTC CGTAACGAAGGAATCGATAGAACGCATAATCCAGAG TTTA ACCATGATAGAGGCT  
TATGCGGCTTATTGGGATTACAATGATGTAAT GAAA TGTGTG GAAA ACCTTGTGAGTATATCGTACGTG  
C TTTG AATAACGGG GAAA CT CAGGTT CAGTATT CACA TTTAAA AT CAGGACCT CAGGTT GTTGAT TTTAA  
AGCTCCATGGATCCGTATGACGAT GAAAGAAA GTATCTCTGTCTATGGCGGCGTCGATGTAGACTTACAT  
GCAGATCATGAATTACG TAAAAT TTTAGAAA CA CAAA CATCTCTCCAGA GAAA ACGTATGTTTCATGCCT  
CACGAGGAGAGCTGATCGT TTTG CTA TTTGATGAGCTGG TTTG TGATAAGCTCATCGCTCCGCATCACAT  
TACAGATCATCCATTA GAAA CAACGCCACT TTTGTAAA ACATTGCGTTCTGGGGAT GAAA CTCTGGTAGAA  
CGAT TTTGAGAGTT TTTGTTTAG GAAA AGAGTTGTGTAATGCTTATTCGGAACCTCAATGATCC TTTA CAAC  
AAC GAAA ATTGTTGGAAGAG CAAA TGCG TAAA AAGGC TTTAAA TCCTGACAGCGAATACCATCCTATAGA  
TGAAGAA TTTC TAGAAGCTCT TTTG CCAAGGAATGCCTCCTGCAGGAGGAT TTTG GAATAGGTATCGATCGA  
TTGGTTATGATGTTGACAGACGCTGCATCCATTCGGGATGTCTGT TTTCCCTGTTATGCGGCGTATAG  
AAG CAAA AAAAGAT TAAA GTTT TTTC AC TTTCA TCCCGGTT TTTG CCATCTTCAATGG CAAA ACCTCGGGA  
TAAGATCTCATCACGTAGACGATCCGCTTCTGCCAGTTCTTCACT TTTCTAGCAGCCTCTC TTTG CTCC  
ACAAGAAGTAACACCTCTTCTGGAATATCTGGTTGT GAAA AAGGG CAAA ACTCCAAGCAC TTGATCTATCT  
TTC TTAGTAAGGCGAGAATATGTTGCGCGTCTTG TTTAGAAA ATACGGAAGAGCTG TTTCTGTCTGGAT  
ACCAGTATGTTGGTCAATGCTGCTG TTTAT TTTTC CGAATAAAAAT CAAATAAA GCGGC TAAA GAAGAGGAG  
ATATTCAGGTCATTCGT CAAA GAAGTAATGAAGG TTTCTAAAAAAC TTTGACAGGCTGTAGCTACTTCAG  
GGTGTATGATGTCATCAGGATACGAAGGATCTCCAGCCTACAAAATAAA GTCTCTTAAGCG TTTA AGTGA  
CTGGCGAGAAGCATGCAATCCTCTTGAG TAAA TTTAACTGCGTTCTGTAGTGCCTTGCAGCAAGAGA  
TAACGACTTCCCTCTCCA GAAA ATCCTTGGTCCAG CAAATCTCG TAAAGT GAAA AAGTTCCCTAAGCTTT  
TAGACAT TTTTC TTCTATCAACGAGGAGGTGATGAGAATGCAGCCAATAACGCACAAAGGG TTTG TGTGA  
TAAGGATTCGGATTGTGCGATCTCAT TTTCATGGTGAGGGAAGATATTATCTACTCCTCCAGCATGAATA  
TCGAGGGATTGCCCAAGAAGGGACATAGACATAATGGAACATTC TAAATGCCATCCCGGGCGTCC TTTCC  
CAAAAGGACT TTTCCAAA AAATCTCTCCATCGCGATCAGGATCATAAGCT TTTCCATAAAA CAAA GTCACA  
CAAGTTATCCTTATCATATTCTCTGCATCGATACGTGCGCTA TTTCTGAGCTCTTC TAAATTTA AGTGA  
GATAGAGCTCCATAGTTAGGGAAC TACTGATG GAAA AATAGACAGATTGGTCTTGGCCTATGTAGGCAA  
CCCC TTGATTGATAAGTTGCTGAATAGCTTCAATCA TTTGAGGAATGTAGTGGGTGGCATGGGGATAAGC  
ATCCGC TTTCAAGATGTGCAGAG TTTCTAAA TCTG CAAAAAAGCATGAATATAAGGCTGGCAATACTTT  
TCAAGGGAACAACCTTT TTTACGAGCTCCAGCTAAA GTCTTGTCTATCGACATCTGTGATATTCTACCGT  
GATAAA CCGAGTATCC TAAAAAGAGCAGGACTCT TTTCACTAGATCTTCGAATATATACGTGC GAAA ATT  
CCCTATGTGTGCGTAATCATAACCGTAGGACCGCAGGTATAGAGCTTGACAGGATCGTTAACAGGGAGA  
AAACGTTCCCTCTCTCTAGATAGGGTGTATACA GAAATAAA TCTATAGCAGTATTCATAC GAAA AGGCC  
TTGTT TTTGTACTGTTAGAGCGAATCCATCCCTCATGATAAGCAACCT TTTCTCCTTAGTCTATAGAAT  
TTTC CACAGAGCGGGATT CAGCATTCCTTGT TAAA GGAATA GAAA ATATTC CAAA ATCAGAAGCATAGC  
TATGTCGT TTTCAAGAGAGAATC TTTGTTGCT TTTAAT GAAAAAAGAATATACAC GAAA AGTGTTCGA  
AAAGCTGC TTTGGGAGAGGG TTTCTCTGGGT TTTGATGGTGTCTTA TTTCTAACGAACAAGTAAGGAG  
TAGGAATTCATGTCTTC TTTACGGATTGCTAGAAGTTGCTC TTTCAAGCAGAAA ACTCT TTTG GCTGCC  
TAGT TTTCTTTG GACTAGGTGCGTCTCAGGATGCGTACTCCTTCTAATTCAGAGAGATTGCTTGGTA  
TGATAGATTATCAAGAAGCTAGGGACGAGAGTAGAGA GAAAGAT TTTA CCCATGTTGTTGTT TTTCTCTGGC  
TCTGATTGGAATGGTAGTTGTAT GAAA ATCCGTGATGAAGTGCTAAGCTCGTCGGA TTTCATCTCAGCTG  
TTGCTGACCAAT TTTGTGTGCGTAGTTGTGCA TTTCCCTCGTCATACAGAGTTGCGAGATCCTCTCA TAAA  
CGAG CAAA ATGAAGA TTTAAA GAATAGACTGTATGTCAATACCTTCCCTAG TTTG GTATTGTTGTCCTCC  
GAAGAACGAGCGATCTATAAGATC GAAA GT TTTGGAAAT GAAA ATGGATCGAATCTAGGAGAGAGCTTGT  
GCAGAGTCATTGCTAATGACCAGGAAC TAGAACAAGT TTTCCCACTCATCCCTACACTATCTTCGGTAGC  
GTTAC GAAA AACTATCAGCTCGCTGAAGAGCTATCGC GAAA AGA TTTCATGGCAACAGCTCTTGAGCAG  
GGGGTGTGTGCGATGATAGCTT TTTCTATCCGAGAAG TTTCCGGCAGCTCGTTGAAGCGGGTAGAATGG  
ATTCAGAGGAGTGTGCTGTGTAAGAATCGGTTGCTAGAATTAGATCCTGAGAATGAGCAGCTCACGCA  
TTTCACAGTGGC TTTAATTGAA TTTCAAGAGTTAGC TAAACGTTCTCAAGGGCAGTCGCACGTGAATGTT  
GCTGAAGTAATCGCACC TTTAGCAGAATATCTTACACA TTTG GAGAACAGGA TAAA GAGAACCAGTGA

GACTTGAGATGATTA TTTCTCAATATTATCTCGATGCTGGGCTCCCTAATAGTGCGCTAGAGCACG CAAA  
GATAGCT TTTGAATCGGCTCCGCAAGATATCCAATCCAGCA TTTCCGGTTCGTAGTGCATATAGAACAC  
CAATCC TAAATATAACTCA CAAA TCTAGTATTCTCCCATTCATGCCTCTATAGCGTGAATGGTTTT  
T TTTAGGAT TTTCTACCTCAGCATCTGGATGAAGAGGCGAGGGG CAAA GCCTCAGGTATGCGCTGAAGAAG  
TTCTTCTGATAG TTTCAAAAATCTGGCTGCGAA TTTCTCTCTCGGAGAAA TAACCACCTGACAACCCGGA  
AGAT TTTGGGCGTACATGTC TAAA AGCCTCTCGTACGATCCGCT TAAA ACGATTGCGTTGATGAGCT TTTT  
CAAA TTTCTTTGACACAGTAATTCCTAC TTTA CTGGTGTTCGAATGACGAGAGGGAACGACCCG TAAA GT  
CACTTGATCGGCACGACAACAACGTCATTTCCTCTGAACA TAAACAAA TTG TTTACG TTTT CAG TAAA CGA  
GCATTCTTAGG TAAA GTTAACCGACTCACGAATAGAAGATCT TAAA GATCAATTAAGGAATGTCTACCAT  
GACGGCGACGGCGATT CAAA AGA TTTCTTCCGCTT TTTGTAGCCATGCGAGCTC TAAA TCCTACGGAAT T  
TC TACGC TTTCTCTTACTAGGTTGATAGGTGCG TTTT CACAATACTCTCCTAATACTCTTGAAGTC TTTAG  
GGACTCTGCCC CAAA GAGACTAGGGACGAG TTTAAA GGATCTCACC TAAA AGATCAATACAGGGCAACAA  
TT TTTATGAT TTTCTTGAG TAAAGAAA GTAGTTCCATTAGTAGATAGAATTCTGAGCAAGTCTCTTATTGT  
CAAAA AGTGAGGAAA AGGGTAAA TTTG TTTCTCTAGTTGTTAATCCTCCT TTTA TCCGGGAAGGCTCTTG  
TTTG CAATTCTGTGTATGGAGCGTGGGCTAGTGCC TTAGGAATGCGTAGAGAGCAGAGATCACTGTAAGA  
AAACT TTTACGGTT TTTAGTTGTGCTGCGGAT TTTATAG CAAA AGGGTACTTCTTGTCCGGTAGGAGGAG  
GCTGT TTTGCTAGGGGCTCTCA TTTCTAAGTAT TTTA TGTGGTGAGGGTGTAGTAAGAATCAGTCTCTTT  
TTTA AGAGCCCAAGTAAGGCATATTATGAGAGTTAGTTTCCATCCAT CAAA GCAGACCCCT CAAA AGGTGAC  
AAGCTTGTTCGTGCTAAGGGACGTC TTTATGTTATTAACA GAAA GATCCCAACCGTAAGCAGCGTCAAG  
CAGGGCCTGCTCGTAAGAAGTAATATATAGAT TTTA GGTGAGAACGCATGGCGAAGAAGTCAGCAGTAGCT  
AGAGAAGT TAAA CGTC GAAA ATTAGTAGAAGCTAAT TTTT CAGAAGAGAGCAGAGCTT C GAAA ACTTGCGA  
AGAG TTTATCTGTTAGCGAGGAA GAAA GAGAAA GAGCTCGGGAAGCTCTCAAT TAAA ATGAGAAGAGATAC  
TTCTCCTTCTCG TTTA CATAATAGATGCCTATTAACAGGCCGTCTCTGTTGATACTTTA GAAA G TTTGCT  
ATCTCAAGAATTTG TTTTAGACAAA TGCTTCTATGGGAGATATCCAGGCGTTGT GAAA GCAAGTTGGT  
AGGACTTGTGTTGAGCCCCTT GAAA GGGGCTTTT TTTACTCGTCT TTTACTGTTTCT GAAA GTTCCGGTA  
TATTCT TTTACCT TTTCCAGTTAGGCATTCCT TTTCTTCCATACCATAATTCTTGGGGATCGATCCCCT T  
TT CAGGAGAGTG TTTG CATTCT TTTA AGAATGCGGTGAGCTGTACGATG GAAA TAGGACCGACATTAGTA  
CAGTCT TTTATTTAAGTAGAACCACT TTTCTGTATCAATCGCAAT TTTGATTCAATTGTATCTGGGATG GAAA  
TAA TTTCTGAGTCTCT TAAA GTATTCTGT TAAA AGGAATTTCTCGGAATCTTGTGTTCCATGGAACGATT  
ATCTTGTGTAGAAGAAGGAAGAGGAGGAGAATTAATAGGAAGATAATGG CAAA AATAC CAAA AACATT  
CCTGC CAAA AACCGCCTATTAGATTGCGATTTTT TTTATTAGCTAGGTACGCCGTAAGCATTCCCAGAC  
AGATGTACAG TAAA AAAAAAGGTGAATGGGAACATTCGGAGTTT CATGGGAGGGCTGCCAAT TTTA AGTT  
CGTTG TAAA TAATCACATTAT TTTCTTAGAGCAGCT TTTCTCGCT TAAA AAAAAAGATCATCATAGTACCTTT  
TTCTCGAGAAA CAAA AACAATCAGGAATTACT TTTGCTTAGGATGAAGAACAACAAGGAAGATTCCAGAG  
GCAATGC CAAAGAAA AAAGTAAGGAAGAACCAGCGGACAGGACGGCGATGCTTCT TTTAGCCAGTAAGT  
ATCCTAAGCATCCAGGAATGATGCCTCCTAGAGAATCTCCTAGCTTGATGCTGACTAGTGT CAAA CCAT  
CATTAGCAAGCAGA TAAA ACAGCTCAGTATATCTATACGATATTGCCTATATTCTATA TTTGAATTCAT T  
AAAAAATAATGGGTTCGC TTTCTGT TTTGAAA AACAATATTAACGAGTAGATGAT TTTCTTTTCTAAAAA  
AGCTCCTGTCTACAAGTTAGGGAGCGTT TTTAGAAA GAGAGCAGC TTTGATCTTGTATTGACTTAGATT  
GCAGTAACT TTTA CCTCGTCTCCAGTAACT TTTCTTGG TAAAAAAAAGCT TTTGAAA GTGTTGCTGT TAA  
AAATTT TTTGGCATA GAAATAGAGCTGAATAGAAGAGACAAGATCACGAGAATGAGGCAGCCGAGAGTAT  
GGATAAG CAAAGAT TAAA ATTAGATG TAAA AGAGATTGAATCCCAGAAA CAGTCT TTTAGTTCGCGATATA  
GAGACCCGTGTGATTCAAGTGATCATTCTTACTGCTTAG CAAA AATCGATGGGG TTTTATTATTAGGCG  
GGAATCTCATTGACACGCTTT TTTG GACGCGATATC GAAA GAAT GAAA GGGATCTATGTTGAGCAGGATAG  
CAAGAATTC TTTGG TAAA GGTTCGAGTTGAAGTGAATGTGGACTACGGAG TTTCTATCCCT GAAA AACA  
GAA GAAA TCCAAGGCTGTATTGTATCC GAAA TCTCCGAATATACGGGATTGCATGTTGCTGCGGTT CATG  
TTGTCGT CAAA GGATTAACGCATC CAAA AGCCAAGGATGAAGAAGTTCTTGCTATTTGAAGTTATTGAAGA  
ACCTTG TTTAGAGGAATTGCCTTCGGCAGAAGAATACTTAGAAGAAG TTTCTGTGATT CAAA CTGAAGAA  
TAAA AGGCTCTGTATAGAGCCTTTTT TTTGGTTAGGATCCTCGGTATGTTATTTCGGG TTTGGCGCCTTCT  
TCCTGGATCCGTTGAATGTCT TTTGCTGTGATTCCCTGTACGGTT TTTA ACTCTTCTTCCGAAGCGATGA  
ACACACG TTTCCAGCT TTTAAA CT TTTGAAGTAGACGT TTTGT TTTCACTTACCAGATTCCAGGGATTTT  
TTTGTAGTTAGCACTGCT TTTG CATGTTTT TTA CGATAGTGTGAATCGC GAAA CCGTGGGCTTCATCT  
CGTAATAGCT GAAA GAACTGAAGAATTGCGGATGTGGGATGAAGAAGGATTCCTTGGGG GAAA G TTTTAC

AAAATAGCTTTTCTTGGCGCAAGCTTTTGCTGTGATTGCCAGATTCCTTGGCGATGGTTACTACGGTAAT  
CCCTGTTAAATTCAGCTCCTCTAAAATGCGTTGCGCTCGTTTAAAATTGATTACGTCCACCATCGATTACT  
ATTAAGTTTGGGAGTTCTGTAGTAAGGGATCGGAAACGTCTGTAAAGACCTCTTCAAAAGCAGCCAAGT  
CATCGCCATGAGAAGTAATAGAGAAGGTGCGATATTGTTTGGGAGAGAAGAGATCATTTTCGAAAACAAT  
GCACACACCGACATTATGCTCACCTTGTAAGTGTGCATTGTCATAGCACTCAATGCGATATGGATACTGG  
CTTAAATTAAAGAAAATGTTGCGAGCTTTCATAAGGAGGAGTGATAGAATTGAAAAGTTTCGCTTGTTTCAG  
CAGCATTTTTATGAGCAAGAGCAAGAAGCTCTTTTCGATTTCTGTTTTCGGGCAGCGGATTTTTGGCGG  
TTCAGCAGTGTTTAGTAGATAGGGGAGCTCTGGACTGTCATAAGATACAGGAACAAAATTTTCCTTGGGG  
ATACGAGGATTTTCGTCATAATATTGCAAAATGAAAGAAAATAAGGCAGAATCTTCCCTGAGCATTTT  
CTGGGAAGATAAAAATAACGAGCGCCAAGTAGTTTCCAGAATAGACGGATAGTACAGAGACAATAGCGAG  
AGAACCCTTTCCTATAAAGGCCTAGTACATCGATATCATATGCTTGAAATTTCTCAACATGCTGTTTTGGCC  
ATAGTTTGACGGATCAGGGTGAGAGTGCAGATACAAAAGCTGCGGCATGTTCAAACTTTTGTCTTGAGAGG  
CTTTTTCATTCGCTTTTCTAAGTTAGATATTGTGGAACGCACATCTCCTTTAAAGAAAAGAAATGGCTTT  
GTCAAAAGTTTCTCTGGTATTCCGTTTGGAGAACAATACTACACAAGGAGCTAAGCATCTTTTCATTTTCA  
TAGAGGACGCAAGGACGTTGGCGAGTGCAGAATTTCTGATCGGAGCATGTCCTCAAAAGGGAACCAGAGGC  
TAATGACTTCTAGCAGGGCATAGCAGGCTTTCAGCACTGACATAAGGCCCGAATAACCCTGTTTTTTT  
ACCTGGGGAAAAGAGCCCGTGTTCGTATAGCTTCAATTTCTAGGCCAAGGATGTTCCAGGGATACAGATAGG  
CAGAAAATATGTTTATCGTCTTTGAGAAGGACGTTGTAGCGAGGCTGATATTTTTTGATTAAGTTGT  
CTAGGAGAATGGCCTCTGTTTTCATTTGAAAACAACAATCGTGTCTATATCTGTAGTTTTTTTTCATTA  
AGGGATGCGTTACGGGAATCGCCTTTCTTTTGAAGATATGAAAGAAAGTCGATTCGTAAATTTTTCGCC  
TTACCTACGTAAAGAACTGTTTCTTGGGAGTCTTTTCATTAGATAGACCCAGGAGAAGAAGAAAAGTCTT  
TTAAAGAAAATCCTCTATGCGCAGCGAAGAAAATCGTAAACAAAAGAATTAACATGACCAGTTGTTG  
AGCTTTTTTCAGGCTCTGGGCGTAGATCTGGGCCCTTGAATTTGATGCAAGATCTGCTGTGCTCTTGATACA  
ACGGAAAGAGGAAAACCTGCAAGCTTAGCGACATGAATGCCAAAACTTTTTTTTCGAGTGCCCTTTTACGA  
TCTCGTACATGAAAATAGGTTGTCCGCTATTTTCTTAAACCATAGCGTGAAAATTTTCTACATGCTGACA  
GTGCATTTTCTAATTCGTAAGTTCTTTATAATGGGTAGCGAATAGTGTTTTGTCTTTTTCATCTGTA  
AACAGAAGGAACCTACTACAGCTTGGGCAATAGCAAGCCATCATAAGTACTTGTCCCTCTACCGATTT  
CATCAAGAATAACCAATGATCTATCTGTTGCATTGTGCAGGATATTTGCCGTTTCGCCATCTCTACCAT  
AAAAGGTAGACATCCCCTTAGAAAAGTTATCTCCAGCGCCAATACGTGTAAAATTTTATCTACTATACCA  
ATATGAGCAGAACGTGCCGGTATGAAAGATCCCAATTGAGCCATAATGACAAGGAGTGCAATTTTGCGGAA  
TATAGGTGGATTTCCAGCCATATTAGGCCCTGTGAGGAGGATCATTCGTGTTTGGGCACTGTGCATCAC  
TGTGTCAATTAGGAAATAAGTCCCCTTTATCTAGTAGGGTCAGGGCGACGGGATGCATTCCTTTGTAATG  
GATAAAAGCATCGTATGGTCAACGAGGGGGCGCGATAATCATATCTGCAGCTAGTTCTGCCAGAGATA  
CCACATAGTCTAAGTCTGCAACTGCAGTGAAAAGTTTGAAGATGAGATCTCGATGTTCTACGATATA  
ACAAAAGCTCCTTAAAGAGCTTGGTTTCTAAAGTTTGTAGCTTATCTTCCACGCTAAAATCTTCACTCTGG  
AATTGTTGAAGTTCTTGGCTAGTGAATCGTTCTGCATGTAGCCGTGATTGCCGACGGATAAAATCCTTGG  
GAAGTTGGGGGGCTAGATTGCTAGCCACTTCAATGTAATATCCTAATGCCTGAGCATAACAGACTTTGAG  
TTTCTTAATGCCTGTTTCATTTTCAATACGTTCTTGGTATTCAAGAATCCAGGATTTAGAATTTTCTTTG  
ATGTTTCTTAGTTCGTAGAAGATCTGGATGATAGTGGTTTGCAGAAATATTCCCTTCGGACACTTTTAAAG  
GAAGTTCTTGATAAGCTCTGTGATAACGTTTATAAGAGAGCATAGAGGGGGAGCAATCAAAAACCTT  
ATTCTCTAAAATTCGGGTAGAGCACAGTTTTCGAAAATTTGTCTGCAATGTGTGTACAAGAGAGCAGCGAG  
TCTCGAAGCGTTCCAATATCTTTTCGGAGTAGCCAGACTAGTTGAGATTTTAGTAGCTAGACGTTCTAAGT  
CTCGTACACAGGACAACGACGTTTAAAGATTTTTCGAAGATCTTCTGTGTAAGAAAATTTCTACT  
GTCTGTCTAAGAGTGAATTTCTTTTAAATCATAGAAAAGGATTGATTAAGGTAATTTCTTAAATAAAAGACCT  
CCCATTTGGGGTGGAGTTTCGTTCCATAACTTGAAGCAAAGATCCTTTTCCATGCTCACCATGAATAGGAG  
ACAGTAGTTCTAGATTTGTTTGGGAAGCTTTATCAATAAGTAAATGTTTCTGTTGTCCAATAAATTTTGG  
AATGGAGAGATGGGAAATAGGAAGAAGAAGTTTGTCTGAATATAAGACAGTAATGCTCCGGCCGATTA  
ATAGCAGGGACTAGTCTTGCAATCAAAACCATCTAAAGAGGAAAATGAAAACACGTATATAAATTTCT  
TTGTTGCAGACTGATACTCGAAAAGCCCAAGAAAAGTATTCCGGATAGTGTGATACGTAAATGCTGTGGAG  
TTGTTAATAACAGCTGCATTTTTTTGATAAAATTTTTCGTTGGCTCAATAACTCTGTAGGAGCCAGCCGA  
CAGATCGCCTCAATAAGGTCCTTGGTATTATCGTATTCAGCAACAAGGAAAGTTTCTATCGACAAGTCTA  
AACAGGAGAGACCATAGAGAGACCTTACTTGGATTGATTGCAAGGACATAGTTAATTTGCTTTTTTCTGGGAG  
CAAAAGAAAGAGATAAGAGTGCTCCAGGGGTTATCAATCGGTTGATTGTCCGAGGAACGAGGCCTTGCTC



CCTTCAGTATTATCGGCCTGCTCAGCAATGGCTACCTTAAAACCGCGGCTTACTAGACGGTCCACATATC  
CATCCAGACAAGTTGCTGGGATGCCGCTCATCGGCACATTCTGTCTCTGTGTAAAAGTAATATCTAGAT  
TTGAGCTAGGATCAAAAGCATCGTCAAAAATGCTTCAAAAACCTCTCCAAGGCAGAAATAACAATAGACAA  
TCACCAGCTTGCTCTTTGCACTGATGCCATTGCTGCATCATTGGGGTTAGTTGTGTGTATAGCTTTAT  
CTAGTATTGCGTGATCGAAAAAATTTTTATTTCGTAGTAGGGGAACAGGCTCTTATGTATCAGAGAACCT  
TCGAAACGCGAGTGTACAACGGTGTGAATTTTGGGAATACAAGACTTTGGGAAGCAAAATTCCTAAG  
AGAAAAGGAATCCATCAGGGAGAAAGAACACACATTCCAAAGAAATTATAGTGCCTTACCATGGCGG  
ATCCTTATCGCCGAAGAGCGGGCATCGCGTGAAAATAATATTGTACGATGCTTATATTACGAATAGT  
GGATCATAAGAGAAGAGCAACAAGAGGATTGGAGCTAGGCTAGTATGTATTACACAGAAGAGAGCTTAGA  
GACTCTAAAACATAGTATTGATATTGTTAGCGTTTGGGGGAATACGTACAATTAAAGCGCAGCGGTGCA  
GATTACAAGGCTTGCTGTCTTTTCATGATGAGAAACACCGTCATTATCGTGTACCCAACCTAGAGGCC  
ACTACCATTGTTATGGATGTGGAGAGCATGGCGATGCCATTAATTTTCATTATGAAACAGCAGGGATATTC  
TTTCCTGAAGCGGTACTTTTCCTAGCGAAAAAGTTTCATGTTGATCTTGTGTGTCAGAACTAGAGAGACC  
TCAGGGCAAGATTCAAAAGATAGTCTTCGGCGTATTAACAGAGAAGCTGAAAGGTTTTCCTAATACTGTT  
TATTACATTTGCCGGAAGGGGAAGAGGCTTTAGCCTAATTAATAAAGCGAGGGTTTTCCTCCCGATACGAT  
AGATCGTTTTCAGATTGGTTATGCTCCTGAGCAAGATTATTTATTCAGCGATGGAAGAGCGCAATATT  
TCGTGAAGCAGCTAGAGTGGGCTGGGTATCTCGCTAAAGACTGGTTTTGTGTTGCTCAGAGAATCATGT  
TCCCGATTCAAGATGCCTTAGGCTATAACCATTGGATTTTCCTTCGGAGGTTCAAGAGGTTGGCGTGG  
TGAAATATATTAATTCCCCGGAGACCATTTTATTTAAAAAATCTCGGGTATTATACGGGTTACAATTT  
TCCTGAAGCGCATCGCTAAAGAGCGGAGAGTGATTTAGTTGAAGGTCAGGCAGATTGTTTGCAAATGA  
TTGATTTTGGCTTCAACTGTACTTTGGCTGCTCAAGGGACTTTCACAGAGACTCATGTGCATGAGTT  
AGTTAAATTAGGAGTATCAAAAGCTTATTTATTAATTTGATGGGGATGCTGCTGGAAGAAAGCATCGTTA  
CGTGTGGGGATCTTTGCTCAGGCTGCAGGGATTACTGCTATAGTCTGTTCGGCTCCTTCTGGGCAAGATC  
CGGATTCCTTTTAAATGCAACGAGGGCCTGAAGAGTTACGAGAGCTTCTCGATAGAGGAGAGGATTATCT  
TTCTTTCTAGTTTGGCATAAGATTCATTCTTATGAACAGTTTACTCCAAGAGAAAAGCTCGAGTAATC  
GAAGAGGTAATTCAACAGGTGCGTTGTTGGGGAAGTCCATTACCATTATGAGTACTTGGAGCAGTTGG  
CTTCTTTGGTCAAGTTCCAGAACCTGCTGTTTGGAGCTATCTTTCCTTCATTACGTCTGCTGCTGAAGA  
CAAAGGGAAGAAAGGTTCCCGCAAAAGAACCTTCTCAGAGTCTGAGCAAACTTCTACAGAAGGAAAATTT  
TCAAAAAAATTTCTCCGAGGATGATTTTAGAAGCTGACGTGATACGGTGTGTTTATTATTTGCTAAGCCCG  
AAGATGAGTTTGTCCCGCAACGGTAAAGCAGTATCTTTCCTCCGGAAGAGTTTCATTGTGCAGAATATCG  
AGCTATAATTTGTTATGGCTATGAATCACTACAATGATCGGCAAACTGCCCCCTATGGACGAGATGATG  
TCTTTAGTTGTTGGTACTGAAGCAATGACTCTTCTTGTGTCAGACGGATGAATACCGAACTTATGAGAG  
ACATTGTTGTTCAATCGATTCAAAAATTATTGGAACAACATTGGCGAGACAAGAAACGTAAGCTATGTCA  
TCAGACGGGTAAAGGTTTAGATTCTTTACAAGAGTATGTTCTGCTTTTCCTCGGAGAGAGTTAAGGTTTCT  
TTAGTTTCTTAATTATAAGAATCTTAATCAAGTTTAAACAATATTGCTTATTAGTTTCTTTTGTTATAGA  
ATATTAGCTCGTTAGTTCTCAATTTATTGGGTTTATGAGAAGTCTTCACTTTTATTAACAGCATTTAC  
TTTCCTCTGTTTGTGGAGCAGCTTTGACCCTTCATCTCCTAAGACATTGAGTTTGTGTTGCTGCGGAA  
GCTGCTGGAGTGGGCGTGCACGTCTTCTCTGTTGCTTCCCTACTAGATTCTGCCATGAAGTTGCTA  
AAAGTGCTGGGGTGGGTACGGCTCTGCCTATATTCAAAATGAACATAAAAATTTACAGAGCCAGGAATT  
AGAAGGTTACTCGCTTCTCAAAGAAATATTTAGTTGAGTTTCAAGAGTCTATAGACTGGGAAATTTCTTC  
CCGGTTTTTTAAATTTAAGCAGCTATTTTGTACATTGTGATAGCCTTGATCGCAAAATCTTATTTTA  
GTAGAAGAGGAGTTCTCTCATGAGATCTTGTAGCTTTATTTCTCACTGATACTAGTTCTTCTGCGACT  
GAGGCATTCTCAACAGAGGATAAGCAGTGTCAACAAGAAGCAGAGGAAGACTGTAGTCAGGTAGCGGACA  
CCTGCGTATTTTACAGCTATGCAGAGGGTTTGAACACGCAAGGGACGAAGGAACTCACCTTAGTAGT  
ATTGTTAGATACTTCTGGGATATTCCTTCGAGACTCTTGCTTATGCAGCCCATGCTATGAAAGTTGCTG  
CTATCCACAATTTGCTGATTTGTGGTTCCTTCCTAGGAGGGAAGCAGTCCACTGATTTATCTCCGGTTC  
CAGATCCTATGGTTGGCGAGATAGCGTTGTTCTTAGAAGCTTTTCCTCAGATCAAAATTTTCATCACAGCC  
TGTGATTGTTACCTTAGCTATTGGGGCTTCTTCTGCAGAGATCATGGATATTACCGAGATGCCGTCAATA  
AATCCTGAATTTGTTGAGTAGTTAAGTCCACCCTTATAAAAAAAGGCCTTCTCTTTGTGAAAAGAGAAG  
GCTTTCTTTTGTCTGGAAAGAACTTGTATTCTTACAGAACATCCCAAGCATAAGAAACCAAACTTT  
TGAGCTGCTATCAGCAGAGCAATACGTTGGTTTTCGAGTGCTTTTCATCATCGCTAGCGACACGCACAGAGT  
CTAAAAGAGTTCCGGTGCCTTGTGCAACTCTTTCCTAATAGATGTAAGTAGTCTTTCGAGCTTATTGGTAA  
AGCAGTAGTTTCCTCTCAAAACGATCCAGAGCCTGTTTGAATAACAATCTTCGGCAGATTGTAAGGAA

AACATCTGCTCTGTAACGGAGAAGGATAGTGAGGCAAGAATTTTC TTTAGCCTGTTGTGCGTTGCAGCAA  
TGGT TTT CAGTATCTGAGTATTCTTCAGTTCTTGATAGACTGAGCAC TTT GAATGATAGT TAAA GGATT  
TTTA GGGCAGTTATCTGTAAGGACTGTTGCTATAATCTCT TTTA TCAAATCCTAGTGAGGATAAGATCGTT  
CTCAACCGTCCC CAAACAAATGTATTGAG TTTG CTTAAGACTTCTTCTGGAGACCATACTGTATTAGGAA  
TAGAGCTCGGGAAGTGTCAATAAGCCGTG CAAATAAA TCTTCTATATCTACAGAGC TTTG AGTGGTGT  
GAGAAGAGTAAGGA TTTCCAAA GACTGGCGTCGTAGGGCATAAGGATCATGAGAGGAGGTGGGGAGAAGC  
CCTAGAATGAAGCAAGAGAGCAGGTTATCTATTCTATC TAAA ATACTTAATAAA GCCCCTGTAGTGGAGA  
TGTTGGAACC TAAA GTAATGTGTTGCAGATGTTCTCCAATAGCTAATGCAGCTGCTCGGGATAGAGAAGC  
AT TTTG TAAGTAATATCTTCCCATAAATCCCTGTAGTTCTGGGAATTCATTGACAACCGAAGATACAAGA  
TCTGC TTTG CAGTAATGTATAGCGGTATCAATATCCTC TTTA GCGCATAAGGGGAGGAGTGCATAAGCCT  
CTTCTAAGTGTAACCT CAAACGAGAAGT TTTA TCCGC TAAA CTACCTAAGGATT CAAA ATAGGTGACAGA  
TTTA AG TTTCTCTACGAATGAG GAAA GAGGGGTAAG CAAATCTTG TTTGAATAA GAAA TTCCCATCCGTA  
AGTCGTGGAGC TAAA GCTTT TTTCA TTGCCCTCAACGATACTGTCTGTAGGAGAATTATCACACACGATTA  
AGAATCGATTGGTGA TTTCTCCTTGCATAT TTTG TGTGGGAAGTACCGTTGATGCTGAATCA TTT CAGC  
TATTAGTAGTTC TTTAGGAAGAGAA CAAA AAGCTGGGT CAAA TTGCGCACTAATAA CAAACGGATGCTCT  
GTAAGGAAGACTG TTT CGTCAACAAGGTGTT CAGGAGCAATCGCCACGA TTTG ATCCCCTGT CAAA TTCT  
GCAGCCCTTG TTTA ATGATTGCCCGACGTTCTT TTTG TGACACGATAACACAAGCAC TACGCAACGTATC  
GACATACATGTTGCTGGATGGGATCGTCAATTGACGATTGTCCAGCTGACGATGTCCCCAAGAAGTATTG  
CCTGATGATACGAATCC TAAA GATATAGGGAGAA TTTG ATCCCCATATAGCGCAACCAACCAGCGAATAG  
GGCGAGCATATTCACGCCACCATTATCCCAGGTCATTT TTTG GGG GAAA CCGATGGATCGAATCAATTG  
AGGGAGCTCATTAACAAGAATAGCTGCAG TTTCTTTG CGTTCTTCTGGAATAACAA GAAA TAGGTAATCG  
GTACCATTGATAGAACGAACACGA CAAA TCGCAGAAGGTTGATC CAAA GC ACTTCGGTGAGAGATCGATA  
ATCCATGTGAGGGGAAGAATTGTTCTCCTTGAGGAGACACGGAGCCATCTGTCA TAAA TAATAAG GAAA G  
AGGGGGCCCTTT TTTCTCAGATTCCGGACGAATCGTTACATGACTAAGACCTTCTATGCACAATGCCAAT  
CGTCGTGGAGTGCCTAATACTTCGAGATG TTTG TAAGCAATGCCATGGTTCGGCAAGGAG TTTCTTTG CGA  
GCGATTTCGAGTTGTTGAATTCAGTAGGGACAAAGGTCGCTGGCAACTCCTCGCTTCCAATTTTCGAGCAG  
AAA GCTTCTCGCTGG CAAA ATTGTTGGGAT TTTCTTTG GTTACTGTTGGTGTGGAAGGAGGAGT TTTA  
AGGAGAG GAAA CCCTAATGACTCCCGCCATGCCACATACTTATCTGCAGCAGCTCGTGCTAGTTGCCGTA  
TCTTGCAATATACCGCGTGC GTTCTGT CACAGAAA TTACCCTCGGAATCTAGCATAT TAAA GGCATG  
GGAAGC TTTG ATGAC GAAATCATATGCTGGGAGAGGGAGGCCCTTGGTCTAGAGTTGCCAACGCTTCTGCA  
GAGAAGTCAT CAAA ATGT TTTA ACCACATGGTAGTGTGGCAGTCT CAAA ATTGTATTGGCTCCAGGCCT  
GTTCTGCATACTGTGTGATGTCTCCATAAGTAAGAGAACCATTCCACATCACATCGTAGACGGAGTTCTT  
TTTC TGAAGATACATAGCGATTGCTCAACACCATAAGTAA TTT C GCGCTAATTGCATC TAAA GG TTTA  
CTTCTACAGCTTGGAAGTAGGTCAGTTGTGTA TTT C ATACCA TTTA ACCATACTTCCAGCCTAGCC  
CCCAAGCTCCAATAGTAGGAT TTT C CCAGTCATCGTGAAC GAAA CCGATGTCATGATCTAC TAAATTTAA  
TCCGATGAC TTTG AGAGATTCTAAG TAAAGG GAAAGAAA AT TTT C AGGGACAGG TTTG AGGATCACCTGT  
AACTGGTGGTACT TTTG TAATCGATTAGGGTGTGTCCATAACGACCGTCTTGCGGGCGCCGAGAAGGTT  
CGATATAAGCTGTT C TAAA AAGGTTCCGGGCT TAAA GATTGCA GAAA GGTGCTGGGT TAAA TGTCCGGC  
TCCAAC TTT C TCAATATCCTTGATGAATGATGCAGCCTTGTTCGCTC CAAA AG TTTAGAAATAGCTGCC  
ATCATGGCTTGAAGAGT TAAA AAGGTTGTGAGGACA TAAA AACTCCTAGATATCTGAGAAA AAGAAGAGCCT  
TACGGACACGGAATACGGCTT GAAA TAGGAGCCGGGCTCTGCAGAACAAGGATTAAGAAA TCCCTTGATAT  
TCCTAGAGGAACATACTAGTGGAAGCTGTATTAATTGAACAAGGCGA GAAATGCCCTGTTTATAAGAGAA  
ATCGATATTGCAATAGAGAGAACTAGTGCTAAGTT TTTGAAA AAGGA TTTA GAATGTATTTA TTT CAAA  
TATAGATGG GAAA GACTGGCGA TAAA TTCTA GAAA TGCTAAGAATGAGAGAACTAA GAAAGTGAGCAGTC  
ACGAGAGGGATT TTTG CCGTT TTTA CAGAGAGGAGGAGCCGGATAGATCATAACATGTGGTGTGACTTT  
TTCAAAA AAGAAA ATATCTGGTGTGAAGCACTAGACTTGGGAATT CAAA AAGA TTT C TTGGGGAACAGAT  
GAGAGTAAGCTTAC CAAA CTTCCTGACAGTT TTT C GTCTATTTA TCACACCGATT TTTATGATTC TTTAC  
TTAAA AAGTCCGGTGGTTCGGGTTGTC TGCCGCA TTT C TGCCTTATGTTCTCCTCTTT TTTG CTGATCATT  
CG GAAA TCACGGATGCTGTAGATGGATATATTGCGA GAAAGT TTT C CCAGGTAACAGATCTGG GAAA ACT  
TCTAGATCCCATGGCTGATAGTGTATACCGTA TTT C GCTGTACCTCACGTTACACAACCCCCGTTGAAT  
CTTCTCTCATACTTGTG TTTA TTT C TTAGCTCGAGATTCGGTTATTAGCAC TTTG CGTACGCTGTGCG  
CTAGTAGGGGACAAGTATTAGCTGCTAGGATGAGTGGGAAGT TAAA AGCTATTCTTCAAGCTATTAGCTT  
CTT TTT C ATCAT TTT C TCGATGTTCC TTTG TG CAAA AAGCATTATCTCCACAGACGA TTTA GAGTT TTT C

TCAACAGTGATAGTGTC**TTTAGTAGCCTTTA**TTCTA**TTTG**CTCTGGAGTTGAGTATA**TTTGGGTGAATA**  
**AAAGTCACTTATTACAGAAAAATGACTCGCCGGATGGCGAGTCATAGGGAAGTTA**TTG**TTTATAAATTT**  
**CTAAA**T**TTTA**TTGGCGGCAG**TTTC**TAGGTCTGAA**GAAAA****TTTA**GACAAGCACGTACAATATGTTGCCA  
CTTGTTCATGGTTGGTACGGTAGGTGTCACTGCTTC**CAAA**AGCATG**TTTC**GGAATTCATAGAAGTCATGC  
GGAT**TAAA**GAAG**GAAA**ATCCATTGATTCAT**TTTG**CTACAGTATCTGCTAGTCTCCTGTAGCTCTTACTA  
ACGGTACAGTCCCCTAACGCATTCCAATC**TTTG**TGTGAGCCACATGGTT**CAAA**CATAGAAGGAATGCA  
GATCATATCTGCAGCGGC**GAAAA****TTTG**TCGTGCCAGCACATCACTATAAGT**CAAA**AGAATCCTTACATTA  
GGGAATTCGTAATGATTCTTGAAGA**TTTGCAAA**TTCTTCATGCAATTGATTCCCGTAGCAGGTACCTA  
TAATAATGAGCGTGTAAAGCG**TTTC**TAGTGCATGGAGAATGGCCTG**TTTC****TAAA**GTGAGGACC**TTTC**TG  
CTCAGCAATTCTA**GAAA**TAATGCACACGCAAGGAGAGTGTT**TAAA**GAGAGGCCTAATC**TTTC**GTACAAG  
GCTTT**TTTA**TTCTCGGC**TTTAGCTTCAAA**AAAAATGAAGGGGTCTC**GAAA**AGCTC**TTTAGTGTAGTTT**  
**TCGC****TAAA**TTGGGATCCG**TTTC**AGGCC**CAAA**TTGTCTGTGCGATTCCATT**CAAA**ATCCCGCGGAGATG  
ATGTTGTCTAGCAGTAATGGCATCGTGA**TTTC**CTAATCGGAATAATCTTCAAGAA**TTTCTTTG**GCGTAT  
GTAGGA**GAA**ACCGTAGTCAC**GAAA**TCTGAACAGTA**TAAAGCTCCTTTTAGCAACACACAAGTTTG**TGGAT  
CGC**GAAA**TAGTTGGTACTGGCTGATA**TAAA**ATTCA**TTCAAA**GAGGAGGCTTCTAATA**TTTC**TCGTGTTGT  
ATAGCCTCGATAAC**CAAA**ATTATGTAGGGTAAGAACAATCT**TTTG**TAATTGAGAGCAGGGCTGTTG**TTTG**  
AGTAGTCCAGCAACTAATCCTGTATGCCAATCGTG**TAAAT**GAAACGATATTGGCTCCTTCTT**TTTG**GATGT  
AGGAGGCCGAGCAGCA**GAAAA**AAGCG**CAAAA**ACGGAAGGCATCATCGCTTGTGTAGATTG**TTTC**CGCATT  
CTCGAATAACTCTGGCTGTGTGTCGAG**TTTGA**ATAGAGTTACT**TTTA**ATTCC**TTCA****TAAA**AGTAGG**GAAA**  
GCAGTTGCTTCTGTCTCCAG**CAAAA**AAAAATAAGATAAT**TTTGA**ATCGAG**CAAA**GATCTTGTTC**TTTGG**  
**GCAAA**G**TAAA**TAAT**TTA**GGGTATA**TAAA**GGGATTACCAC**TCCG**TGTGTGATTAGCGGC**TAAA**AGCT**TTTGC**  
TAGTCCGTATAGCGCTCTCCAGGCCTCCGGC**TTTG**ATTACCGGAG**CAAA**ATTCGATAGCTGTGTGAATA  
AT**TTTC**ATTAGCAAGCT**TTTC**G**TTTC**GTTAAT**TAAATAAA**ACTCGTTAATTAT**TTTC****TTTAAC****CAAAA**AATA  
ATCAAGATGTT**TTTG**TTATAT**TTA**ATTACT**TTTT**AT**TTA**ATGGATAG**TTTC**TGCTCATAGAAGGTTGTTGT  
GGTGGTAAGATGCCCT**TAAAT**GT**TAAA**AAACT**TTTG**ATT**TTTG**A**GAAATTT**CTACCGATA**TAAA**AAGGTCT  
TGTGAGGTACACTCGGTCTCTTCCATTGGGGTGTGGCAAGCGGTAAGGCAGCGGTT**TTTGG**TACCGGC  
ATCGGAGGTT**CGAATCCTTCC**ACCCAGAGTTGTCT**TTTA**ATCC**CTTAGG**CTGG**TTTA**ATCGGAATC  
TCTTATTGAATAGGAGAGAT**TTTC**GATTGGGGCTATCTAAGGGAACAGAAGGCTTGATAATAATCAGAGG  
CTGCAAGTACCATGGTAGGCGCTTGTCTGGAGGGGA**TTTC**TTCGTATGTGCCAT**TTTA**AAGCCGTCTGGT  
ATAGCGGTAGGACCGTTCATCCGGTTGAGG**GAAA**AGAAGCCCTAAGGCCATT**CAA**AGGCCCT**TTTAG**CT  
CAAGGTAATGGAGAATAGCAT**TTTA**TGGA**ACTCGTAGTTCAA**AGT**CGTGAGACTGATAAGAAGTCTGTTA**  
TTAA**GAAA**ATTCGTCAGCAAGGTGGAATCCTGCTGTTCT**TTTA**ATCCGGGG**GAAA**AAGCTTAGCTAATAT  
CGTTGTAGATGCGGAGT**TTTC**AGTAAG**TTTCTTTC**TACT**TTTGAAA**CGGGGC**TTTAG**CTTCTACTGTG  
TTCACGC**TTTC**TTATGAAGGACG**GAAATCAA**AGCT**TTTAGTCAA**AGATATTCAGTACCATGTAACGACTT  
ATGATGTAATTCATCTCGAT**TTTGA**AGAATTAGTGGATGGTCGCGACGTTCCGGTGAATGTTCCATTCG  
TTGCATCAACACGGTAGATTGTGTGGGG**TAAA**ATTAGGAGGATC**TTTA**AGACAAGTGATTCCGTGCATC  
CGAGTTG**TTTG**TAAGC**CAAA**AGATATTGTTCCATT**TTTG**GAGTTGGATGTT**CAGTCC**TAGGGC**TTTC****TC**  
**AAA**CCC**TAAA**ACTATCGGAT**TTTG**TATTCCTGAAGGAATTAGACCTGTCACTTCTCT**TAAA**GAAGTTGC  
TGTAACGGTAGCACGACGATAAGATTATCATGG**TAAA**GCTAGTTGTTGGCATAG**GAAA**TCCTGGACGACA  
GTATGCTGGACAAGGCATAACATAGGT**TTTC****TTTG**TTGGACTCGCTAGCATCACGTTTT**TTA**GGGGCT  
**TTTC**GTGAGGCCCCACGTC**TTTA**TGCTTCGTT**TG**CGAAGGTA**GAAATTT**CAAGCGAGGCAGTTGTTCTTA  
TGAAGCCCACCACTTATGTCAATCTTACTGG**TAAA**GCTGTCTTAGCTGCCAAGAAGTT**TTTC**GATG**TTTC**  
CATGGAAGATATTCTTGTGTAGCAGACGACATCAATCGGGAATTCGGT**TTTG**TGCGT**TTTC**GGCAAGAT  
TGTGGCTCTGGTGGGCACAATGGAATTAAGAATACCACGCAGATTCGCAATCCAATCATTATTGGCAAC  
TACGCTTGGGGTAGGAAGGCCTTCGTATCCTGGAGCTGAAGGGTTGCTGATTATGTATTATCTAGTT**T**  
**TTCTTTG**AAT**GAAAA****GAAAA**AT**TAAAT**GACTTT**TTTAGAAA**AAGGGATAGAA**GAAA**TCCTTCTTGGCTA  
GGTTGTTAGTCTGACGGGGAT**TTA**CTGTTCACTT**TTTGAAA**AAAAAGTTCT**GAAA**AATAATCAG**TTTC**GA  
TAACATGGAAGCGCTTCTTATAGAGTAGCTATCTTAGTTATTGGAAGAAGCAAGGTCAATGCTTAGGAG  
TT**TTTA**AT**GAAAA**AAAAAACAGGCCAAC**TTTA**TGAGGGAGCCTATGTT**TTTA**AGCGTGACGTTAAGTGAAG  
ACGCTAGACGTAAGGC**TTTAGAAA**AAGTTACTTCTGGGATCACCATTATGGTGGCGAAGTTCT**GAAA**AT  
TCATGATCAGGGGCG**CAAA**AAGTTAGCTTACACAATTCGTGGTGCTAGAGAAGGCTATTACTAC**TTTATT**  
**TATTT**ACAGTAGCCCCAGAAGCTATCGCAGAATGTTGGAGAGAGTATCA**TTTAAA**CGAAGATCTTCTTC  
GATTCATGACTCT**TAAA**GCAAGCGCTGT**GAAA**GAAGT**TTTA**GAATTCGCTACATTGCCAGAATAATAGTT

AAGGAGAACGTATGAATAGACCTGTTTCATAATGAACACAGAAGGAAGCGTTTCGCTAAGAAAATGTCCTTT  
TGTTTC CGCGGGTTGGAAGACCATCGATTACAAGGACGTTACCCTCTAAAAAGGTTTATTACG GAAAGA  
GGAAA GATTCTTCCAAGAAGGATTACAGGGGTTTC TTCTCGCTTCCAAGCGCTGCTTGCTCAAGCTGTTA  
AGAGAGCTCGACATGTAGGGCTTTTGCC TTTCTGAGGAGAAGAT TAAACT TAAA GGAAGAATAACGGATG  
AAA CCACAATTACTTTATTAGAGGATGTCGATGGCTTAGGGCGTTCCGGCGATCTTGTGTGCTAAGC  
CCGGATACGTTA GAAA CTACCTGCTCCC TAAA GGAAGGCAGTGGTTGCTAGCGCTGGAACCTCTCCGTTT  
GCAAG CAAA GTTGCAAGAGCAGCG TTTGCTGCAAGCTGCGCCGA TAAA GAAGAGTCTCTTCG TTTG GCA  
GAGATGCTTAGAAGCATCGT TTTG GATTTC CAAGTTCGTGTAGATTCTGAGAATAATATGTACGGTTCCG  
TAACCGTGAATGATATGATTAGTGCTGCTGAGCAACAAGGTGTTGTTCTTACACGTAAGAA TTTCCCTCG  
CTCTCATAGCGGTATTAAGAATCTCGGAAGACACGTAAGTTGGACT GAAAT TAAA AGAAGGCGTGACTGCG  
GATCTTCA TTTG GAAGTTCGTGCTGATCAC GAAA TCATTGAA CAAA AAGAACTC CAAA GCGCAGAAGA  
AAGAAGGT TAAA CTT TTTGTTTG TTGGGGGAAGAGATTCTTTTC TTCCCACCTCTTTTTTTTTA TTT TTT  
AATTATGCAC TTTCTTTCTCCAG CAAA GCTTAATCTCTTT TTTG CAGATACTGGCAGGCGGGAAGATGAT  
TTTC AT GAAATAGTCACACGCTATCAAGCGATAGCC TTTGGGGATCAACTCTCCTTATCAATAAGCTCTC  
GCGATTCTCTCCAAGTAATTAATGCTTGTCTCTTT GAAA CGCCTAGTAATTCTATATG GAAA AGTGTGGC  
GCT TTTCCGTCGGTACACAGGCATTACAACGCTGTTAGTTGGCGTGTAGT CAAA CAGATCCCTGTTGGA  
GCAGGTCTTGCAGGAGGGAGTAGTAATGCAGCAACTGCATTG TTTGCTTTTAAAC CAAATCTT CAAAACAG  
GACTATCTGATGAG GAAA TCGTTCCTTAGCCGAACAGATTGGCATGGATACTCCTTT TTTCT TTTCTAC  
AGGAGCAGCCTTAGGAGTGGCCCGTGGGGA GAAA ATAATAGCTCTAGAAGAGAGTG TTTCCAGATAGATAT  
GT TTTG TATTTTCT TAGTGAAGGAGTCTCTACTAGTCGGGCT TTTG CCGTCGTACAACCTTCGGACTGTT  
CCTCCAGAAAAATTTAGAGTATACG CAAA ATGACTTAGAAA AGCCTGTTTTTC GGTGCGCTTAGA TTT  
GAAA GAAAAGAAA CATTTGGCTAGAAA GCCTGTGGGCGGAACCTCCTGTGCATATAGGGCTAACGGGATCA  
GGGGCAACCTTAT TTTG TCCGTTACCCA GAAA TCTTAGAGGAAGACCCTTCTTATGCAGCTCAGATA CAAA  
GAGCAGTAACGTTAAGCGGAGGATTATTGACTTCTCCGATACGAAGAGATCCTACAGCTTGGTATAGCAT  
CTATTCT GAAA GTGCACCTGCAGCTACATAAGATACTCTGCAAGGAGCTTC TTTA TCCGGAGCTTTAGAA  
ATAG TAAACTGTCTATTGGACTCAGAATCT TTTG GAAGCAGAAA GAATGCTTGATGACGCAGCAACAACCTC  
GATCCATCATAGAAGCAAGCTTATCATTATCGTTCTC TAAA GACAGCATAAATTGTGTGTTGCATATTTCCA  
GCTCCTTA TAAA TCCCTGCGCTGTTGTATCCCTAGTA CAAA AATACTTGATTTTT TTTCCAGATAGAAA AAAC  
AGCTCTGCCCCCTACAGAGCCCT TTTAAAGGGGGA CAAA AATACTTCTTT TTTG TTAGCGGAACAAG CAAA  
ACAT TAAA CCGGTGGAACAGCTC TAAA GAGC CAAA ATATACTCAGAGATACAAGAGAAGGTAACAATGCTGA  
TAAA AATAATTTAAT TAAA GAGATGTCAGAGTGC GG GAAA GTTGGTCGCAGAATAAGGTATCCAACAATA  
TTGGGCATATTAGACAC TAAA GTGAGCCCTCCTGCAGACATACTCCAAC CAAA ACCAGGTAAA GATAAC  
AATCA TTTGCCATAGG TAAATTGTGAACGATATGATTCACCAGAGCATTGTCTAAGAAGATT GAAA ACAT  
ATATGAGGTCATCATATAGCC TAAA TCTGACATGCCGTGCATGAGCTCAAGCATCCACCATTCTGAAGT  
TCTC CAAA TATCACTACTCCAACATAGAACAATCCTAC GAAA CAGACT TTTGCTGT TTTGATAGGATGTT  
GG TAAA AAATCGTGAATCGCT GAAA CCCTAAGTA GAAA AATAAATAA AATCT TAAA AATAAGGGGATTGC  
GCGGCTGAGAATCACACAACCAACAAGAACAACATGAAT GAAA AATAATCCACGAAGGAAGGCGATCATTC  
ATCATAGTTGTACTGGGGATGGT TTTAGGGAACTT TTTAAATCT TTTCCGAA TAAA CAGAAAAAATTTG  
TTGTAGAAA CCAGAATAGCAAGAATTAC TTTCCAA CAAA AATGACTGATAATGAAGCTG TTTGTCCATTT  
AATTTCTGGAAGAATAGTCAG TAAA GCTCTTGAA GAAA ATGAAGAAGT TAAA CCGCTGATC GAAA TATTG  
GAAA AATAAATCCCATAGTTGCATAG CAAA ACTTGGGAGAAGGAGAGAATTTGTAAA ACTGT TTTAGACA  
ATAGTGTAGCTGCAATAATCATCGCTCCGGATTC TTTAAGGAAA AAAGCGGATAGCGGTGCTGCAATCAT  
AATAGTCCACCACCA CAAATGGGGGATTGTTTC CCTATTTTTGCGATCGTTG CAAA GACTCTCTGAGAA  
AAGTATTCGATAGGTCGCGATTCAAGGAGAATCAGCATAGCGATAA TAAA AAGGGAGAAGACATAG TTTCC  
GGCTATC GAAA TAGGCCATGGTTATGCGATAGCCTTCTGTATA TAAA AATAGACAGAATAGCGGAATCGC  
C CAAA GAACGAAGACCAGTTCAACGCGACTAACGATGCGCAGAAGCTCACTTAAC CAAA GGTACTGACGC  
CAGCGTTCTG GAAA AATCATCTTT TTTA TGCTGAGACTCTTCGTATAATCGTGTTAACCATGGTGTAAGAA  
AGGTATGAATCACCGCA GAAAAAATAAGAAATCGCTGACCCGATGCGTAATCCTGAGGAGTAATGGGGTAA  
AATCATA GAAA CTACAAGATAGAGGGCTATCGTC TTTATCACACTAGAGGGAGGCTTGTATT TAAA GGG  
TAATAGCTAGCTCACTCCTAGCTCTCTATCACTA TTTCCGATGCACA TAAA GAAGCAAGAGGTT TTTCTC  
GGATGAAGAACCTCTTCATCCGA GAAA ATGTAAGTACAAGAATGTTATT TTTCC TGCAGCAGATTGGCTC  
CATAGACGAGGAGTTGGA TTTCTGGGC CAAA ACTTTTGACT CAAA AATCTTTCACAGTACTTT TTTGAAA TA  
GCTGTAATCCATAGAACGGGCAGCAGCTATTT TTTG GTCTGGGCGA GAAA AATCCTGTTTTTTTCGTTTCA

AAAGCTATAGAGAATAATTTTTCGCCATAGCTAAAGGTGTGGAAC TTGGAAGCAATATGGACTGGATAT  
ATGTTTC TCGAAGCTGTT CAAA GATCTCTTCGGACAAGCCTGCAGATTCTGGATCAGTAGCAATCTTTG  
TATAAA GAGTTGTGTTCTATGCACAAGCTCCTCAGGAGAATAGTTATTGGATCGAATATA GAAA AGTCCA  
CAAGGAGTTTC TCGAATTCCAGATA TTTA GAACCTACCATATACCCAAGTTGTTGCTCTGTACG TAAAT  
CAGAGAAGTACAAGTTATGGATCCAAGATAACAACATACTAGTAGCTACAGAGTCCTTATATTGATGGGG  
ATCTTCGT TTTG TFCGAGCAGCAGCATACCATTTTC CAGAGAGAGGATATTGGAAC GAAAGC TTTG TAGAA  
GAGAGAGGT TTTCTTTG AGGATAATAGCTAGGAGCAGCATAAGGAGACGAAGCTTCTG CAAA GTTAGAGA  
GAGTCGATAATAAA TTGGAGAGATCTTGAGCCGAGAGCGTTCCCTAGTGC TAAA GATTCTACAGCTAGTTC  
TTGGAGTAG TTTA TTCGTGAAGTTCG CAAA CTCTCTGCTAGGAGAGGGTG TTTAAA GTATTGAGCTTATCT  
TCTAAG GAAACGGTATCAACAAGAATCTGAGAGTATAG TTTA TTGAGACCAGCTCTTATAGGGCAGGCAA  
TAAGATCTTCTGATATTGTTCTGATAGCTGATC TTTG TAATATA GAAA CAGAC TTTCTTCCACAGGAAG  
ATCTCG TAAAGAAGACAG TAAA GCATTGATAAGAACAGGAGAGGTCTCAGTATATCC TAAA AGA GAAAGA  
TCAACTCCTGTCGCTCCAGGAGATACTG CAAA AGTCATTCCAGCT TTTAAA GCATCGTCATAACGT TTTA  
TTAATG TTTCA TTAGCTAGTAGACTATATAGGTCTCGTAATAC TAAA GAACGCACATCTGTTCTGTTGAAT  
TTGAGGAGAACGGATGCGCAACTCCATAGCTAT TTTAGGAATCGTATAGAAA GAGTCTTACACAAGTATAT  
AAAGTGATCGCAT TTTGATCATAGGTCAGCTGCGGAGAAAAG CAAA CCCTTCGTGTTG TTTCT TTTGAG  
ATAATAATTGGACTG TTTGAGGAA TAAATTTA TTGGGATTTGGAAAAG CAAA TCCTAAGGAGGAGGATC  
CTGTATAGGTGT GAAA TCTAAGGGTT TTTCTATA GAAA GTGTCTG CAAA GATGGGATCATAGAATTCATCT  
GCATTCCTCCAAGAACTCGGTAGGGTAGCAGATAAGATATAACGTGCCTGTTGAGGGTCTGCT TAAA AATG  
TAG CAAA GG TTTG TTCATCTTCTTGGGAGTATTCTGGATAGACAAGAGAGCGATAAGGGTATGTTGCTAA  
TGGTTCAGAAG TAAA ATTGGGGACCATTCTGTGATAGTGTGCGAGAATAACTCGG TTTG CGTGTGTAAGTA  
TATTCTAAA GAGTTGAT TTTCTGTATCTCTGGCAAGGAGTAGGCAGGAAGTCGTTTCATGACGAACATAAT  
CAAGAAAAG CAAA AGTTAGCTG CAAA ACTCTTTG ATATTCTCGGTTCCCTTATTGGTGAG TTTATAAAG  
AATTTTCAAATCTTGTGTATTATGAGAAGTGCTG TAAA GTTCTGCTTCCATCTCAGTAATGAGCTGTTCT  
TTTTT GAG TAAA GCAACAAGACTAT TTTCTTTTTT CACTAGATAAAA ATAGAAA TCAGTGACTGAGCCCATC  
CTTGTAAGGACTGTGGAGCATCATAAA AATGCCAG TAAATAGCTAGTTGTGGAGAAGGTTTCGACAGCCTT  
ATTGATGAACAG TTTA TTAAGAGCAGTAGTATCTTGTGTCTTTTGAAA CCGT TTTG TGGTGTGACTGT  
GCAGATATAGGGAT TTT CAGAGAATAGGGACGCGATATACGGCACTGCGGTGTTCCAACGGAGCTGTAGTGT  
AAA CAATTGCTGCCATAT TTTCTGGAGAGTAGTGAGTGG CAAA CCATG TTTG CATATCTTGAGTAGTGAC  
GGAGTTGAGGGTAGAGAGATTGCCGCAGC CAAA GCGT TTTA ATGGGTGATT TTTA GGAGCTATAAGTTGT  
TGAATACGATGCATACGACGAGAATC TTTAGTTGGATGCATCG CAAA TTCTTGCTCAACAGCATGAACTT  
CTTTGTTTAAA TCTTCTTGGCGGAAGAGAGGTTGGA TAAAGAGATGTA CAAA CTGATCCAGAGCATTATC  
TAAA TCTGCATTG TTTA CGGAGAATAGGAAGCAGGT TTTATCTGGGTAAG TAAA TCGGTTATAGATACCC  
CCATGTGTGCTTAGGAAGGCAG GAAA TCCTGAGGGCTCGGGATATT TTTCA TTCCCGGAACACACAGT  
GTTCTG TAAA ATGGGCTAAGCCTGGGAATTCGACAGGATCTGCATTA TTTCTGT TTTGACAAC TAAAGC  
GGCTCCGACTCAGCAGCATGAGGGGAGGATACAATCATGAGAGAGAGTCCGTTAGGGCATAGAAT TTTA  
GCAATTT TTTG ATCTGCTAATGCAGGGGT CAAA ATAGT CAAA GGGT TTTCA TCTCGAATCG TTTGAAAAGG  
ATTT CAGCAAGCAGTTA GAAA AGAAGGAATG CAAA GAAGTAATAGGGATAGGGAACGCTTCATATTTT  
GGGGTCATTGGTAGGGTCATTGATAACAGGAAGGTGTTGTCCA TTTATTT C GCAACCACCGGGTTGAGG  
CT TTTA T CAAA AGGCCAGGGGTTCTGTC AAGTTAGAA TTTCTTTG TAGAGATCGGTCACGATAGAGAAGG  
CACGAGAGGCTCT TAAA GCACGTAGGGCGT TTTA TCATATATATCCGCTTCTTCGGAAGAA CAAA GCTC  
ATCGAGCAACAGTTCGTCTC CAAA GT TAAA AGCAACGGGG CAAA TGAGATCACGCGATGTTCTCCGATC  
GCTTCTCTATTGTGCGAGGCGGAGGAAGAATATCATAGGT TTTCA TTGCTAAA GGGAA GAAA TGAGTCTG  
T TTTCCGGAGCT TTTG GCAAGGAGGCGGAACATCTCTACACTGTCAGGAT GAAA TTCTGCAGGGTACAA  
TTCTCCTTGAAGATTT TTTACGATCTCTTCTCCGGAAGGAGCAACATAAAA GAAATTTCCCTCCTTCGCTA  
AGAAGCATT TTTA ATGTTCTCATGCTTT TTTGGTTATGCATGAGCT TTTCTTC TTT CAGTTCTGGAGGGT  
GATTGATGTGTCTT TTTGAATAAAA TACACAGAAGATCGCATCCCATGCTAAA AGGTCTGCGCTAGAGGATC  
TGAAGTGATCCGATCCCCTGCAA CAAA GATCATGCTTTCCATGAGTTGCGGATGGGAGGCTCCGAGTAAG  
CAGTACATGAGCTGGGGTCTGATTCGTCTGGTGGTTAGCTAACAGCACCAGTTGTGTCCAGCTTGGGA  
TATATCTTGAATCTGATCCAATCGCTCAGGATGTAGAA TTTG TGATT TTTGGTCTCAATCAGCGCAGA  
AAAAAGTTCGATGC CAAA TTGG TAAA GATCAATTGGCGAGCGAATTTT TTTG TGGTAGGGAGG GAAAATA  
ATAGGATTTCTTAAGGTCATCAATAATGACCTTAAGCCATTGAGAA CAAAGAGCTTCCGCTTTCTCAGCGG  
AGCATTT TTTAGATGCAGCCTCGATGTAGG TTTG ATAG CAAATTTGAAA CT TTTG GTA CAAA GGCTCTG

TAAAAGCTGATCTTCAAAAGCCTGATAAAAAAGTTTGAAAAATGCATCAACACACCTATTTATAACTCA  
ATTCTTCTCCTGTAATCAATGAGAAA AATTGGTAGTGGTTAAGATGGATAGAATCGGACGTATTGATTT  
GTAGCTTAGCTTTCAATTGCTTAGCCAAGCGAATGAGTTCGACATCGTCCTGCTCTTGTTTCATATAGTG  
GGCGATTTCCGGATGAACGACCAAA CACAAGTTCGTGTGCTCTTTGTGTTTAATAATTTCTTCAGGTCA  
CGCTCAATTTCTATGAGGATACTTTCAGAGGTTTGATGATCGCGTTCCATTACAATATGGACAGGTGG  
TAAA TAGGGTCTGCATTAGTGA CTACGATTTCTCTGGCGAGTCA TTTCTACTAGCCCAAA TTCACTCAT  
GCTCAAGATTGTACAGCGCGCAGCATCATATTTCATGTGCTCTTTAATCTTTCCAAAACACGACGCTGA  
TTCTTGCGTGA TTTCAATATCGATAAAA ATCTATGATCACAAGTCCGCCAATA TTTCTTAGACGCAGTTGTC  
TAGCAA TTTCTTCTGCGGCTTCTAAGTTAA TTTG CACTAGAGTCTCTTCGACTCCAT TTTCCAGCTGTGT  
GCTACGTCCAGAGTTCACATCGATCGTGTGCATAGCTTCTGT TTTGT CAAA GAAGAGATATCCTCCGCTA  
GACAGCCAGATT TTTCTCTTGGTAGCGGATCGA TTTCTTTCTCAATAT TAAA GCGTTCGAACATTGGAA  
CCGAATCGCGATAATACTCAATCTTTA CCGTCTGTCTGGAGAATA TTTACCCAATAAGCG TTTGCATT  
TTGATAGGTCGCGTAATCGTCTATTAA CAAA CGCTTGTAGCTCTTATCTACACAAGTCACTACAGCTTTT  
TT CAGAATATCTGTCTTTCGTAGAGAAGAGAAGGATGATCTGGAGAA TAAA A TTTCTCTAGGATAC TTT  
GCCAAGTATTCAAGAGATCCTGAGCCTCGTTAATTAGAGTCTCTGTTGAAGCGGAGATACTCGCAGTCCG  
ACAGATAAGACCCATAT TTTGGGGCA TTTCAAAAAGAGCGAATTAAC TGT TTTGAGTTGATCTCGCATCAGA  
GGGTCTTCAATCTTACGAGAAA CACCTCGGTGAGGGGAATTCGGTAGAAGGACTAAGTAGCGTCCAGGGA  
TTGAAA TATTAGAAGTGAGTCGAGCTCC TTTCTGCCCTATAGGTTCTTCACTACCTGAACAAGTACGGG  
ACTGTCAAG TTTGAGTAGCTCTTCTATAGGAGCTTCGGAGG TTTCTTCTGGCCGGGTTCTGCGTGATCT  
GCATCAGAATCTATATCGAACATCTGTTCAATTT TTTAGAATTCCTAATACGTCCGAGATATGAA TAA  
AGCCATTTCTCCCGCTCATCTATGTTAAT GAAA GCGGATTGAATG TTTCTG TAAAATGTTAGTTACGCGACC  
TCTATATATGTTCCCT TTTAACTGGCGAATTTTT TTTCTTTCAATGAT CAAA TCAAA CAATTGGCCATTT  
TTTTAA TGC GCGTAACGAATCTCT TTTAGACTCTATA TTTAGTAAGATATCGTT TTTCCATGGCGTTCC TAA  
ATGCTCTGCGCTCTACAGGAGTCTCACCTGATTCGAGGATGGGAGTTAT TTTAAAATTTA TTAAGCA  
GAAGGCGGATTATAAGTTCGATTAG TAAAAAATTTCTA CAAA AATGCTTGTGTTGAATAGTTTAA TTTAG  
AAACTGAT TTTGTTCT TTTAATTGTGATTTCTATAGTGACAAC TCCAACCTTATTTCTGTTGGCAATCC  
GCTTTCTCTGTGTTCTGTTGCTCAGCGACAGGATAAGAAGGCTGTTCCCTTATGCTG CAAACACTTTT TTT  
AAAAC TTTATTTTCTATAACCCCTATT TTTGTCTAGAAGCAACCTA TTTGTTAGGGGAAGTATGGG GAAAA  
CCTTTTGTATCGATAAGAG TTTCCGCGTAAGATA TTTGGAAGAATTATAATTTAAGAAT GAAAGTTGAAA  
GACGCGGAAGGCTAATTGAGAAAAGACGATAACGT GAAATTTTATCTTCATCGAT TAAAATTTCCAGGGG  
ATAGAGAAGATATTCATGCTTCGATCCACCTCAGGTAT TTTGCGATTCCGAAGAAGAGGGTATGTGTTT  
CCCTGTGGAAAATTCGGGGGAGTCTA GAAATGGTAAGTGGAGAGCAGTGGTT TTTGTCCTTAGAAA TTTCT  
ACGATAC TTTCTCTTCGCTGTAGGA TTTGTGATGCTCCTGTTGAATGGCCAGTACAGGGCATCGTGATTC  
AACAA TTAATTCATTTGTTTCAGATGAGAGATCGGGGGTG TTTGATTGCCGTGATTTGATTCCGGATGAGTT  
ATTTGTTAGAGGGGGATCGT TTTCAAGGAGTCCAGGAAGGAGGATGTCCTGCAAGAGAG TTTAT CAAA AAC  
TT TTTGAAAAAAGGCGGGACGTAAC TCT TTTAGAGAGA GAAAAAAAACCTTCGACTTCC CAAA AACCTTT  
TTCTCTAATATAC TTTCTGTGTTCCGGGAGAAGAATAGAGAGCGAGTCTTCCCTGGTATCGTT TTTCACTG  
CGAAGAGAGGGGGTGTCCCTGTCTGTCGCGGTATAT TTTG GGGAGTCTTCCA CAAA ATGCATCGCTTT  
TTGAATCCTGGGGATCCCCAGACTTCCCTATTGGGGAGGGTAGCTATCTGCAGTCTATAGGAGAAGTTAG  
GAATGGCAGTACCACGTAATCGTCATAGCAATGCTA GAAAGAACATCCGCAGAAGTCACCATG CAAAGAA  
AGCATGTTCCGCTGCGGTGTGCAGTAATTGCAAGCAAGCT TTTA TTCCTCATA CAGTTTGTGCTTCTTGT  
GGTT TTTACAAA GG CAAAGCTGTTATTACGGTTGAGAAGTAATCCAGCACG TAAA A GAAATTCAT GAAAG  
TGCGTCTAGGCGTAGATATGATGGGAGGAGATCATGATCCTCTCGTTG TTTGGGAAGCACTGGGAGAAGT  
TCTTC TTTCTGTC AACAGGTGAACAGCCAGTAGAGTTCACTGT TTTCTGCTACGTCCGATGTTACCACCAA  
TTAATGAATTTCTCCGCTGTCTCGTTCGGTTCCGATCGTGACCCGAGAGGAT TTTG TCTCTATGGAAGATT  
CCTTATTAGCTGTGTTCTG TAAA AAGCGGTCCCTCGATGGCTCTAGGATTGGATGCATTTGCAGCAAGGGGA  
TCTTGACGGT TTTGTTCTTTCAG GAAA TACAGCAGC TTTAGTGACGCTTGCTCGTTC CAAA ATACCTATG  
ATTCGGGCTGTTCTTAGACCCGCA TTTGTTGG TTTCTGTTCCGACTC TTTCTGGA TTTGCGGTTAT TTTAG  
ATGTCGGAGCCACAGTGTCCGTGAATCCTGACGAGATGGTAGGT TTTGCTCGTATGGG TTTGGCTTATCG  
GCAATCGTTGTCTCTAACAGTAACCAGCCG TTTA CTCTTGGGTTACTGAACATTTGGTT CAGAAGAACGC  
AAGGGAACGGATTCTCA TAAA CAGACC TTTCTGTATGCTTCGGAACATC TTTGGTAGCGCTTT TTTAGGAA  
ACATAGAAA GTGGCGATGTCTTTA GCGG CAAA GTAGACATTGTGGTTACAGATGGGTTCACTGGGAATGT  
CTTT TTTGAAAACGGCGGAAGGGTTATTCGAT TTTCTACGACATATTTCTCGGGGATCG TTTGGAAA AATCG

ATTAAGATGCAGTTTGATTACACAATCTATCCTGGTTCTATTATCAGTGGCTTATCTAGACTAGTGATTA  
AATGCCATGGTAAATCTCATGGAACAGCTTTGTTTCGGAGGAAATTC CGGGGCGATTGATTTAGCACGAGC  
TAATGTTGTAGTCGTATTGCAGACAGGTTTGGTATAACGTAGTTAGCTTGATCACCTTTTCAGTGGC  
CTAAGGGTCTGTTC TTTATAAAAATC TTTCTCAAAAAGCAGTCAGCATTGTACATTCCACGGTCTAAGC  
TCTAATGTCGTCTCTGGAGCTTGTCTATGGGTCTTTGTCTTTGTGAAATCACAGGCAGAACGCGTTGT  
TGGACCGATTGTTTCGGTACGCTAGTTTGTCAAAAAGTGCTAATTCGCAGGTTTGAAATGAGTTCGGAG  
AAAAGATAAAAAAGCACCTGTTCTAAGT TTTCTTTG TCTGTAGTAGCAGCTATCC TTGCCTCTGTTAGCG  
GGTTAGCTAGTTGCGTAGATCTTCATGCTGGAGGACAGTCTGTAAA TGAGCTGGTATATGTAGGCCCTCA  
AGCGGT TTTATTGTTAGACCAAA TTCGAGATCTATTCGTTGGGTC TAAA GATAGTCAGGCTGAAGGACAG  
TATAGGTTAATTGTAGGAGATCCAAGTTC TTTCAAGA GAAA GATGCAGATACTCTTCCC GGGAAGGTAG  
AGCAAA GTACTTTG TTCTCAGTAACCAATCCCGTGGT TTTCAAGGTGTGGACCAACAGGATCAAGTCTC  
TTCCAAGGGTTAA TTTGTAGT TTTACGAGCAGCAACCTTGATTCTCCCCGTGACGGAGAATCTTT TTTA  
GGTATTGCTTTTGTTGGGGATAGTAGTAAGGCTGGAATCACATTAAC TGACGT GAAAGCTTCTTTGTCTG  
GAGCGGT TTTATATTCTACAGAAGATCTTATC TTTGAAAAGATTAAGGGTGGATTGAA TTTGCATCATG  
TTCTTCTCTAGAACAGGGGGAGCTTGTGCAGCTCAAAGTAT TTTGATTTCATGATTGTCAAGGATTGCAG  
GT TAAACACTGTACTACAGCCGTGAATGCTGAGGGTCTAGTGCGAATGATCATCTTGGATT TGGAGGAG  
GCGC TTTCTTTGTTACGGGTCTC TTTCTGGAGAGAAAAGTCTCTATATGCCTGCAGGAGATATGGTAGT  
TGCGAATTGTGATGGGGCTATATCT TTTGAAGGAAA CAGCGCGAAC TTTGCTAATGGAGGAGCGATTGCT  
GCCTCTGGGAAA GTGCTT TTTGTCGCTAATGATAAAAAGACTTCT TTTATAGAGAACCAGCTTTGTCTG  
GAGGAGCGATTGCAGCCTCTTCTGATATTGCC TTTCAAAACTGCGCAGAACTAGT TTTCAAAAGGCAATTG  
TGCAATTGGAACAGAGGA TAAAAGGTTCTTTTAGGTGGAGGGCTATATCTTCTCTAGGCACCGTCTTTTG  
CAAGGGAATCACGGGATAACTTGTGATAAGAATGAGTCTGCTTCGCAAGGAGGCGCCATTTTTTG CAAAA  
ATTGTCAGATTTTC TGACAACGAGGGGCCAGTGGT TTTTCAGAGATAGTACAGCTTGCTTAGGAGGAGGCGC  
TATTGCAGCTCAAGAAA TTGTTTC TATTGAGAACAATCAGGCTGGGA TTTTCCTTCGAGGGAGGTAAGGCT  
AGTTTCGGAGGAGGTATTGCGTGTGGATCTTTTTC TTCCGCAGGCGGTGCTTCTGT TTTAGGGACTATTG  
ATATTTTCGAAGAA TTTAGGCGCGATTTTCGTTCTCTCGTACTTTATGTACGACCTCAGATTTAGGA CAAAT  
GGAGTACCAGGGAGGAGGAGCTCTA TTTGGT GAAAATA TTTCTC TTTCTGAGAATGCTGGTGTGCTCACC  
TTTTAA GACAACATTGTGAAGACT TTTGCTTCGAATGGGAAAATTCTGGGAGGAGGAGCGATT TTTAGCTA  
CTGGTAAGGTG GAAA TTACCAATAATTC CGGAGGAA TTTCTTTTA CAG GAAA TGCGAGAGCTCCACAAGC  
TCTTCCAAC TCAAGAGGAG TTTCTTTATTTCAG CAAAAAGAAGGCGACCCTCTCTT CAGGATATTCT  
GGGGAGGAGCGAT TTTAGGAAGAGAAGTAGCTATTCTCCACAACGCTGCAGTAGTA TTTGAG CAAAATC  
GTTTG CAGTGCAGCGAAGAAGAAGCGACATTATTAGGTTGTTGTGGAGGAGGCGCTGTTTCATGGGATGGA  
TAGCACTTCGATTGTTGGCAACTCTTCAGTAAGA TTTGTAATAATTACGCAATGGGACAAGGAGTCTCA  
GGAGGAGCTCT TTTATC TAAAACAGTGCAGTTAGCTG GAAATGGAAGCGTCGATT TTTCTC GAAA TATTG  
CTAG TTTGGGAGGAGGAGCTCTTCAAGCTTCTGAAG GAAATTGTGAGCTAGTTGATAACGGCTATGTGCT  
ATTTCAGAGATAATCGAGGGAGGG TTTATGGGGGTGCTA TTTCTTGCTTACGTGGAGATGTAGTCA TTTCT  
G GAAA CAAGGTAGAGTTGAATTTAAA GACAACATAGCAACACGTC TTTATGTGGAA GAAACTGTAGAAA  
AGGTGAAGAGGTAGAGCCAGCTCCTGAG CAAAAGACAATAATGAGC TTTCTTTC TTAGGGAGTGTAGA  
ACAGAGT TTTATTACTGCAGCTAATCAAGCTCT TTTTCGCATCTGAAGATGGGGATTTATCACCTGAGTCA  
TCCA TTTCTTCTGAAGA ACTTGC GAAAAGAAGAGAGTGTGCTGGAGGAGCTATT TTTGCAAAAACGGGTTCT  
GTATTGTAGATAACCAAGAGGCGTTGTATTCTCGAATAACTTCTCTGATA TTTATGGCGGCGCCATTTT  
TACAGGTTCTCTTCGAGAAGAGGATAAGTTAGATGGG CAAATCCCTGAAGTCTTGATCTCAGGCAATGCA  
GGGGATGTTGTTT TTTCCGGAAA TTCCCTCGAAGCGTGATGAGCATCTTCCCTCATA CAGGTGGGGAGCCA  
TTTG TACT CAAAATTTGACGATTTCTCAGAATACAGGGAATGTTCTGT TTTATAACAACGTGGCCTGTTCT  
GGGAGGAGCTGTTCTGATAGAGGATCATGGTAATGTTCT TTTA GAAGCT TTTG GAGGAGATATTGTTT  
AAAG GAAA TTCTTC TTTTCAGAGCACAAGGATCCGATGCTATCTAT TTTGCAGG TAAA GAATCGCATATTA  
CAGCCCTGAATGCTACGGAAGGACATGCTATTGT TTTTCACGACGCATTAGTT TTTGAAAATC TAAAAGA  
AAGGAAA TCTGCTGAAGTATTGTTAATCAATAGTCGA GAAAATCCAGGTTACACTGGATCTATTCGATTT  
TTAGAAGCAGAAA G TAAA GTTCCCTCAATGTATTCAATGTACAACAAGGAAGCCTTGAGTTGC TAAA TGGAG  
CTACATTATGTAGTTATGGT TTTAAA CAAGATGCTGGAGCTAAGTTGGTATTGGCTGCTGGATC TAAACT  
GAAGAT TTTAGATT CAGGA ACTCCTGTACAAGGGCATGCTATCAG TAAA CCTGAAGCA GAAA TCGAGTCA  
TCTTCTGAACCAGAGGGTGCACATTCTC TTTGGATTGCGAAGAATGCT CAAA CAACAGTTCTTATGGTTG  
ATATCCATACTA TTTCTGTAGAT TTTAGCCTCCTTCTCTTCTAGTCAACAGGAGGGGACAGTAGAAGCTCC

TCAGGTTATTGTTCTGAGGAAGTTATGTTTCGATCTGGAGAGCTTAA TTTGGAGTTAGTTAACACAACA  
GGTACTGGTTAT GAAAATCATGCTTTGTTGAAGAATGAGGCTAAA GTTCCATTGATGTC TTTC GTTGCTT  
CTAGTGATGAAGCTTCAGCC GAAA TCAGTAACTTGTCCG TTTC TGA TTTACAGATTCATGTAGCAACTCC  
AGAGATTGAAGAAGACACATACGGCCATATGGGAGATTGGTCTGAGGCTAAA ATTCAGATGGAACCTTT  
GTCATTAATTGGAATCCTACTGGATATCGATTAGATCCT CAAA AAGCAGGGGC TTTA GTATTTA ATGCAT  
TATGGGAAGAAGGGGCTGTCTTGTCTGCTCT GAAA AATGCACGC TTTC CTCATAATCTCACTGCTCAGCG  
TATGGAATTCGATTATTCTA CAAA TGTGTGGGGATTCGCC TTTC GTGG TTTC CGA ACTCTATCTGCAGAG  
AATCTGGTTGCTATTGATGGATA CAAA GGAGCTTATGGTGGTGTCTCTGCTGGAGTCGATATTCAATTGA  
TGGAAGAT TTTC TTCTAGGAGTTAGTGGAGCTGC TTTC CTAGG TAAA ATGGATAGTCAGAAG TTTC ATGC  
GGAGG TTTC TCGGAAGGGAGTTGTTGGTCTGTATATACAGGATT TTTAGCTGGATCCTGGTTCTT CAAA  
GGACAATATAGCCTTGGA GAAA CACAGAACGATAT GAAA ACGCGTTATGGAGTACTAGGAGAGTCGAGTG  
CTTCTTGACATCTCGAGGAGTACTGGCAGATGC TTTA GTTGAATACCGAAG TTTA GTTGGTCTGTGAG  
ACCTACTT TTTA TGC TTTC CAT TTTC AATCCTTATGTCGAAGTATCTTATGCTTCTAT GAAA TTCCTGGC  
TTTA CAGAACAAGGAAGAGAAGCGGTTCT TTTG AAGACGCTTCCCTTACCAATATCACCATTCC TTTAG  
GGATGAAG TTTC GAATTGGCGTTCA TAAA AGGACAGT TTTC CAGAGGTGA ACTC TTTC GGAATAAGTTATGC  
ATGGGAAGCTTATC GAAA AGTAGAAGGAGGCGCGGTGCAGCT TTTA GAAGCTGGG TTTC GATTGGGAGGGA  
GCTCCAATGGATCTTCC TAGACAGGAGCTGCGTGTGCTCTG GAAA ATAATACGGAATGGAGTCTTACT  
TCAGCACAGTCTTAGGATTAACAGCTT TTTG TGGAGGATTTA CTCTACAGATAG TAAA CTAGGATATGA  
GGCGAATGCTGGATTGCGATTGATCT TTTA ATGGATTGGAAGAGCTAACAGCAACCATTCTATCCCTAAT  
CTCCCATCAGAGATTAGGGATTTTT TTTA TTAGCTAGTCAATAAGTTGAGGAGAAGATAGAATC TTTC TT  
TTTT TTTC GCTAG GAAACAAA ATTTG TGCAGAAA TAGGTCTGAGGCTGTTTT TTTC GTCCATCTGCATGA  
CGATCA TTTAAA GGAGATTGATGACTACTCTTCCCAATACTGTACTT CAAA CTCCAATTCTA TAAA TA  
C TTTC AC GAAA GATATC GAAA TGG CAAA GCAGATCCAAGGCTCTCGGAAGGATCCTCTTGC TAAA ACCTC  
ATGGATCGCAGGATTGATCTGTGTTGTTGCTGGGGTATTGGGACTTCTTGTATAGGAATAGGAGGATGT  
TCTATGGCTCCGGATTAGGATTAATCGGTGCTATAATTGCTGCTGTGTCGTAGCCGTCGG TTTA TGCT  
GCTTGGTATCAGCT TTTA TGCTTGAAGTTGAGAAA TCTCAATGGTGGCAGAAAAGAG TTTA AGTCTTGGAT  
AGAG CAAA AATCCCAG TTTA GAATTGTAATGGCTGACATGCTCGAAG CAAA TCAGAAA ATTGCAATCAGAA  
GTGGAATTCC TTTCAAA AGGTTGGAGCGATGCTGCCGAGTGCACAAGGAAGATGTGACGAAGTATGAGC  
AAGTTGTT GAAA AATATGGTGA GAAA ATTATGAAGCTATATAAG CAAA CAGGTGTTCTTACCATA GAAA  
AGTCAATCTTCAGAAA GAGAAA AAACTTGGCTGGAAGAGAAA GCT GAAATGGAG CAAA AATTAACAACC  
GTTACGGATCTGGAGGCAG CAAA ACACAATTAGAAGA GAAA GTGACAGATCTAGAGTCAGAGAAA CAAG  
AGTTGCGTGAAGAATTAGACAAA GCTACAGAGAATCTTGATGAGATGGCTCATGAAGCGATGGAATTC GA  
AAA GAAA AACATGGTAT CAAA CCAGGAAGACGTGGTTCGATATAGAAGAAGACGAATGTCTAATTCGTT  
GTTTT TTTA ATAGAAGCCTGGCCTGTAGTAATAAGACCAGGCTATTTTT TTTC GATTTCGTTAATCTCGAC  
GAC TTTC ATCAATAATGGACTGAG TAAA GTCTTGAATCTCT TTTG GAAA TATTTT TAGCCAGCAG TTTC GT  
CTGTCTG CAAA TTCTCGTGTGTGGTGTCTTAGAGTT TTTG AGTAGGGCTCGGCC TTTC TTCGTGCCGGAT  
GTCTTGACGCGGAGAAGCTTT TTTC TGA TTTG CATCCACT TTTA GGGAG GAAA AGACTAGTAAGTAGTG  
TAGCTAGGAACCCTCCGAATAGGACGCCCTCGCAACCATAAGCAACA TTTA TTTTT TTTAGGTT TTTC GCT  
TCTGAACATCCT TTTC TCCACAAA CAAGGTTAATCTTT TTTC TTATCAAGAGCCATGCGCATAGGGCTA  
TAGCGGCAAG TTTC GCTCCACAAA GTAGGCGGCTGCTGCAACTAT TTTC CAGAGTCTTATTATCCTCAAG  
TTCGTCGCTAGCTGAGACAT TTTC CCGTCCGCATACTTCTTGCCTAACCA TTTA GAATAAA TTTTTT G  
CCAATCAATAGAGGTGCAAGCCATCGAGCTTCGAAGTTGAATAGAGAAGAAA TTCGACTGACAAGTTTCA  
TAATCTTATGGAGCTTGGAGTAGGCAGATGG TAAA GG CAAA AATCAAGACCATCCC TAAAGAAA GCAG  
AATGCAACAGGCAAC TAAA GCTTCTAT CAAA TAGGGGGTCA TAAAA CAAAAA TAAATCATTTAGTTT  
TCGATAATTAT TTTC TTACTTCTTA TTTAAAAAGTGAATGGCCG TTTC GAATTTTGTGTTGGTTA TAAATA  
GTAAGCTATTGATACCCAGATTGATG TTTGAG GAAA TGTCTTAAGAAGGCGAATTG CAAAGAT TTTGATA  
AAAA TAGGGAATA TTTA TCTCT GAAA ATCAAGGATCAGTTAGT TTTG AGC CAAA GGATATTCTTAGGGAT  
AGAGCAATGACACGTGATGTGAGCCAGCTAT TTTG GAACTGACGGAGTGCAGGACGGG CAAA TTTC GAGC  
CTATGACGGTG GAAA CTCTGTCTCCTTGGTAAGGCCATTGCAGGGGTGTTATTAGA GAAA CATGCCGG  
TAAGCATCGCGTAGTTGTTGG TAAA GATACCCGACTCTCTGGATATATG TTTG AAA ATGCTCTGATAGCA  
GGTCTTACTTCTATGGGGATA GAAA CCTGATGTTGGGACCTATCCCTACCCAGGAGTGGCAT TTTA ATTA  
CTCGAGCTTATCGTGCAGATGCTGGGATTATGA TTTC CAGCATCGCACAATCCTTATCGAGATAATGGAAT  
TAAGAT TTTC TCTTCGGATGGATT CAAA ATTGGCCAGGCAGTGGAAAGAGCGTATCGAAGCCATGGTTGCT



TCGAAAGATTTTGGGAAACTTCCTGATGATCATGCTGTTGGTAAAAATAAAACGAGTCAAAGATGCAACAG  
GAAGATATATTGAGTATGCGAAGGCTACCTTCCC GAAAGGGGAGAACGTAAAAAGGTTTGCATATTGT TTT  
AGATTGTGCTCATGGAGCCACTTATCGAGTAGCTCCTTCCGTA TTTGAAGAATTAGACGCAGAAGTGATC  
TGTTATGGGTGTGAACCTTCGGGATGTAATATCAATGCAGGGTGCGGAGCTTTA TGGCCTTCTACCATT  
AGAAA GCAGTTATTGAACA CAAA GCAGATGTAGGAATTGCATTAGATGGAGACGGGGATCGTCTGATCAT  
GGTTGATGAGAAGGGGCATATTGTAGATGGAGATATGCTGTTAAGCATCTGTGCAAGTGA TTTAAAACGA  
CGACAGGCTCTACCTGATAATCGTGTAGTGGCAACAGTGATGACCAAT TTTGGTGTATTGCGTTATTTAG  
AAA GTC TGGGGATA CAAGTTACAA TTTCTCCTGTAGGAGATCGACATGTATTGCAGCATATGTTGAAAA  
TCAAGCTGTGCTTGGAGGAGAA CAAA GCGGGCATATGATT TTTCTCGATTACAATACAACAGGGGATGGG  
ATCGTATCTGCTCTTCAAGTGTGCGTATTATGATC GAAAGTGAATCGACATTATCCGATCTTACAGCAT  
GTATCG TAAAAGAGTCTCAAGCGCTAATCAATGTCCCTGTGAC GAAA AAGGTGCCCTAGAGTCC TTAGC  
TAATGTACAAGGGGTGCT CAAA GAAG TAAAAGAGGTCTTGGGGGATTCTGGACGTAT TTTG TTAAGATAT  
TCTGGTACA GAAAATA TTTGCAGAGTTATGGTCGAGGGGAC TAAA AAGCATCAAGTGGACTCCCTTGCTA  
AGACAATTGTTGATGTTGTAGAAGCC GAAATTGGAGCCGGGATTTCCGAATAAAAAGGATCGATATGTGTG  
GGATA TTTGGATA TTTAGGAGAAAAGAACGCTGTACC TTTAGT TTTG GAAGGGTGTCTGAACTCGAGTA  
TCGTGTTATGACTCTGCAGGGATAGCAACTCTTATTGAAGGCCGCTTG TTTG TAGAGAAGGCTGTAGGG  
CCTGTAAGCCAGTTATGTTCTGCTG TTTCTTCTGATATCCATTCTCAGGCAGCTATAGGTCATACGCGAT  
GGGCTACACACGGAGAACCTTCCCCT TTTAATGCACATCCTCATATAGATATGGATGCGAGTTGTGC TTT  
GGTGCATAATGGAATTATTGAGAA TTTCCAAA AACT CAAA GAAGA AACTGGAAGAGCAGGGCGTAGTATTT  
TCATCAGATACCGATACAGAGGTTATCGTACA AACT TTTTG CAAGGCGTTA CAAA GAGACAAGAGA TTTAA  
TT CAAA GTT TTTCTGTGACTCT CAAA CGTTACAGGGGAGT TTTG CTTGTGCTCTCATGCACCAAGATCA  
TCCTGAAGT TTTA TTTATGTGCTGCTCAT GAAAGTCTCTCATCTAGGATTAGGAGAAGACGAGGTT TTT  
ATTTCTTCTGATATCCATGCTTT TTTAAAATATTCTGGCTGTACA CAAA CTTGGCTTCAGGAGA AACTAG  
CTGT TTTACGTATAGGGAAGTCTATCGAGACGTACAAT TTTGAGTTAGCGCGTATC CAAAAGGAAGTGCG  
TTGCATAGACCATACAGAAGATTC TTTGGATAAAA AAGGGTTTG ATTATTACATGCT CAAA GAGATCTAT  
GAGCAACCTGAAGTC TTTGAGCGTATCTTACATCTCACGTGTGAAGAGAACAGT TTTACAGAATCTTT TT  
TAAAAGGGTTCCT TTTGGACGAGATT CAGAGCTTGCATATTGTAGCTTGC GGCTTCTTATCATGCCGG  
CTATTTAGC CAAA TATGTGATTGAATCTATCGCTTCCATTCCGGTGTATGTAGAAA TTGCTTCAGAG TTT  
CGTTATCGTCAGCCATATATAGCAGAGCATTGCTAGCTATTCTCATCAGTCAGTCAGGAGAAA CGGCAG  
ATACGTTAGCCGCTCTTAATGAGTTCGCGAAGTTGAG CAAAGCACGTGTTCTCGGGA TTTGTAATGTACG  
AGAGTCCGCTCTTGCTTCTCGAGTCGACCATTGTCTG TTTA TTTGAGGCGGGATTGGAAGTGGGAGTCGCT  
TCTA CAAAGGCATTCACAGCTCAGCTGTTGCTGTGATTCT TTTGGG TTTAAGGCTAG CAAA CCATCGCC  
AAGTCATTGCTCAGGAAGACTTAGCGCAAGCAATCAAGGTCT GAAAGATTTG CCAAATTTGACAAGACT  
TTTC TTAGATAGTTCTATTGACTGGCGTTGCCGA CAAATTGAGGAGACGAGT TTTATTTTC CTAGGG  
CGACGT TTTATGTATCCAA TTTGCATGGAAGCAGC TTTAAAAT TAAAAGAAA TTGCTTACGTAGAAG CAA  
ATGCTTACCCTGCAGGA GAAATGAAGCATGGCCCTATTGCTCTTATTAGAGAGGGGACTCCCGTGATTGT  
GTATTGTGGAGACCGCTCTGTATACAC TAAA ACTATAGGAGCGATCATGGAGGTGAAGGCTA GAAA GGCC  
TATGTGATCGCTCTTGCTCCGGAATCCAATCGGGATATCGCTGCTGTCTCCGACGAGCAGATCTATATCC  
CCGATAGCCACGACCTTGCTGCTCCTATCTTATTACGATAGCAGGCCAGATCATGGCTTACACCATGGC  
TTTA CAGAGAGGAACCGAAGTAGATAGACCTCGGAAC TTGGC TAAA TCTGTTACTGTAGAG TAAA ATCTA  
CAGTTT TTTCTCTCTTGATGAATAGCATAAGCGTCTGTATCTTAGATGGAATCGAGAAGTCG CAAA TCCA  
TGCGACTCTC TAAA AAAGGTATTCTCATGATAAA CAAA ATGTTGGGCGGAGCCTTGCTTGTGCGCAGGAAC  
AACCATTGGCGCCGAGTATTAGCCGTCCCCT TTTCTACCTCAGAAGGGGGATTCCCTGCCTACGACGTTA  
CTCTATATTG TTTCTTGGTTTCATTGCTGTGGCTTCCGGGATTGCTT TTTGGAAGTATTGACCTGGACAC  
ATTCAA GAAA GAATG TAAATATGGTCTCTATGGCAGAGTATAC TTTAGGCCA TAAA AGCAAGATCATTAT  
GTGGTTGGTATACCTACTGCTCT TTTA TTTCCCTCTTGGTGGCTTATT TTTGTGATGGTGGGAATATTCTC  
ATGCGAGTCATGGGATGTCGCGAGTTGGGATACTCCTTGATTGACATGCTATGCCTGTAGTATTT TTTG  
CTTTGT TTTCCCATTTAATGGC GAAA ACATCCATTATCGATCAATGTAACAGGGT TTTCTGTT TTTGG  
CTTAGGAATCGCATTCGCTATGT TTTGCTATTTCTGG TTTCCCTCTTAT GAAAACGGATTTGTTAGTAAGA  
TCTGCTTGGGGAGCTAC TTTAAAAGGATTTCCCAT TTTATT TTTG GCA TTTGGA TTTCAAACGTTGTTCT  
CTACGTTGTATCACTACATGGATAAGAACGTAAA AGATGTGAAGAAGGCCATTGTTATTGGAAGTTTCGAT  
TCC TTTGTTTCTGTACATCA TTTG GGAAGCCATTGTGTTAGGAGCCGTTCCAT TTTCTTTCTTAGAACAA  
GCGAAA GTAGAGGGATGGACTGCTATTGGAGCATTAA CAAA CAGC TTTGAAAATGCGCGGCTT TTTATGTTG

CAGGGGAGTTTTTTGGATTTTTTTCCTTTAATTTCTCATTATAATTGGCGTCTCTTTGGGTTTAAAAGACTT  
TTTTATAGATGCTTTTCAATGGGATGAGAAAAAGCGTAAAGTGAAATCTTTTTCCTTAGTTTTTGTTTTC  
CCTTTGGTGTGGGCTGTTTTCTATCCAGGCATTGTTTGAATGTTTGGAGTGCACCGGCGCTTTAGGTG  
AGACGATAGTTTTAGGAGTTTGCCCCGATTGATGGTATGAAAAGGGCGCTACGGAAAGAAACGTTATTA  
CGGTAAACGCATTCTCCTGGCGGGAAAGGGACTCTCTGGTTATGTCAGGGCTAGTGCTTCTAACCTG  
GTGTTGATTGCCAGAAGTTTCTAGGCTATTAATTCCTTCACTTCAAGTCTCAAGCTCGCATTACAGGATT  
TCTTTTATGCGAGCTTTCGTAAAAGATCGAAAATGATGAAAGCGCGACTGTTTGTCTAGTTGTTTTCCTC  
CATATAGTATAGATTGGATCGTATTGCGTAATGAGAAAGATTCCCCTATCGACATGAAAAAATAGGGGGA  
GGAGGATGTGTATGCGGAATAAGTGTGTAGGAGGAATTTTAATTGTTGCGGGGACTGTAATAGGTGCTGG  
TGTGTTAGCCGTTCCATTTTGACAGCTGTAGAAGGGTTTTCCTGCCGTGGTGCTATATGTGCTCGCT  
TGGTTGGTTTTCGTTAGCCTCAGGTTATGGCTATCTGGAGGTGTTAACCTGGTGTAAAGGAAAATAGACAGG  
CTAACTTATGCTCTATGGCTGAAAGAACTCTAGGGAGAGTAGGACGTATAGTGTATGTTTAGTCTACCT  
GTTTCTATTTTTACTCTTTACTTGTAGCTTATTTTTGTGATGGAGGAAATATTCCTTCGAGTGATCGGA  
GAGAGCTTTTTCTCCTATCCTTGGATGCGACATGTCATGCCCTTTTAATTTTTCTCCCTTTTTGCACCTT  
TGCTGATGGCAAAACACTTCTGTTATTGATTATTGCAATCGGGGGTTTGTTTTTGGCCTTATCTTTGTTTT  
TGGGCTTTTCTGCGTATTGGGTGTGCCGCGTATACAGGGAGAAGTCTATTGCGAGCTTCCCTGGTTTTCC  
TCTCTTAATAGCTTGCCTATTTTCTTCTTAGCATTTTGGATTTTCAAGATGTGGTGGCCCTCTTTGTATCACT  
ACTTGGATGGGAATATTCGTGAGGTAAAACGTGCTATTCTAATAGGGAGTTTGATTCCTTTAATTCCTTA  
TATTGCTTGGGAAGCTTTTGGTTTTAGGGACGGTTCCCTTAGTCGACTTGTAAAAGCTAAGGATTTAGGG  
TGGACTGCTGCAGGAGCTCTCAAGGATCTTTAAAAGAACTCTGCTTTTTATATTGCCGGGGAATTAATTTG  
GATTTTTTGGCTTTGTTACTTCTTTATAGGGACTGCGTTAGCATTAAAGGACTTTTATATAGATATTTT  
TAAATGGGATGCTCGTAAGAAACGGGTATCTTTGTTCTTTTAGTTCAGGATTTTCTTTAGTGTGGCT  
ATTTTTTATCCCGAGATTGTTTTGCTTTGTTTACGCTATGCTGGGGAATAGGGGGAGCTTGCATTGTGCG  
TGTTATCCAGTAGCCATGTTATGGAATGGACGCTATGGAAAAGCGGTTGCTTTTGGTAAAAGGATATT  
GCCAGGAGGAAAGACCGTTCTATTAATTCTAACAGGATATACTGTGTAAAATCTTGCAACCCGTATTAT  
GCGTTTTAGAAAAGAGTTATGTAATAACTATTTTAAATAGGAGATCTCCATGGGATTTGATGATCGCGA  
TTATGCGCAGGATCCCGCTTGCCAGGGACCTTCTCTCCAGAGTATATGGGTGGATGACGGCAGGGCTA  
GCTGTGACTGCTCTAACATCTCTAGGGTTATACGCAACAGGAGCGTACAGAGCGCTTTTCCCTATGTGGT  
GGAATTTGGTGTTTTCAACGCTGGGAGTGTCTTCTATATCCAAGCCAGATTCAAAAACTTTCTGTCCC  
TGCTGTAATGGGATTGTTTTTGGCCTACTCTATTCTAGAAGGGATGTTCTTTTGAACATTGGTACCCGTA  
TACGCCGCTCAATTTTGGAGGCGGGTAGTGTGGCCGCATTTTGGTCTGCTGGTATAATCTTCGGATTGT  
CAGCAGCGTATGGAGCATTCACTAAGAATGATTTTACAATAATCATAGAATTTTGTATGTTGGCACTTGT  
GGGCTGGTAGTGATATCTTAGCCTTTTAAATAGTGTCTCTCTCACGCCATGCCGTTGTTATATCTG  
TTAAATTTGCTACTTAGGTTTGTATTATCTTTGTAGGCTGACAGTAGTGGATGCGCAGTCTATTTCGTG  
TTGCTCGTAGCGTAGGGGATCATGGAGATCTTAGTTATAAGCTTTCTTTGATCATGGCTCTACAGATGTA  
CTGCAATGTAATTATGATATTTTGTATTTGTTGCAGATTTTTCCTCTCTGACAAGAGACGGTAAAGG  
TCGATCGAAAATAGATTTTCTAGGAAAAGAAAGAGGTAATTTAGAGTTCTAAAATACCTCTTTTATG  
TGAAGAAGGAGGGGATTTTTCAGTTTCAACATCCAGTAATTTATCTAGAAAACGGTCTATGGCAAAAGGT  
TCGAAATCATGAATTGTTTCTCCATAGCCTACGAACCGAGTAGGGATTTTGTAGTTCATCTGCGATACGGA  
AGAGAGAGCCTCTTTTGGCAGAACCTTCCACTTTTGTGAAAATAAGTCCATTGATAGGTACGGCTTCATG  
GAATAGTTGCACCTGACTCAATGTGTTGCTTCCAGAGTAGCATCGATCGTCATCAGTGTCTCATGCGGA  
GCTCCAGGAAAAGCTTTGTTGCAACCGGTAGCGATTTTCTGAAGTTCTTAAGAAGATTTCGTGTGTGTGT  
GTAACCTTCCCGAAGTATCTATGATCACATGATCATAGTCCCTAGCGACTGCTGCAGAAATCCCATCAAA  
AGCTATCGCAGCAGCATCTCCTCCAGGTTTCCCTGAGATAAAACCCACAGTTTAAGGTTTCTGCCAACAA  
CGCATCTGGTCCATTCCTGCGGAACGGAAAGTATCAGTAGCTACAATAAAACCTTTTGGTTTTGGAGAAA  
GATAATAGTGAGCCAGTTTCCGCAACTGTGGTGTTTTCCCGGAGCCATTCGTTCCTAGGACAAGAGTAGA  
AAAAGGACGAACAGAAAAGGGCTCTCGTTGGGGGAGCTTAGAAATAATCTTTGATAAGAAAAGAGCGAATA  
AGCTCTTTTCACTGCCGTTTCATCAGGATTTTACATCGGCGTAATCTTTCGCAAAAGCTTCTGTGAGCT  
TAGGGCCAAAATCTCCCTCATAAAGAGAACTTCAGCATATTCTAATAAGTCAGAAAGAAAGCGTCTTTT  
AAAAGAGAGCGGAGTTTGTTCCTGAAAACCTTGAACACTGAGTAATCAAAAGTTGATTGAAGTAAAAGA  
ATAATAAAAGATAAGGAGGAAAATTAAGGGTTATTTATGTCATCTTCATGAGTATCAAGCTAAGGACCT  
TTTTACTGCTTATCAACTTCCCTATCCCCCTATCACGTAGCGACCTCCGTACCTGAAGTAGAAGCAGCG  
ATTCAGCCGAACAATGGAAAGCTGGTGTGTGAAAGCACAGGTTTCATGCTGGAGGAAGAGGAAAATG

GAGGGTGGTTATTGCGCACTCTCCGGAAGACTTATTAGCAGCAGCTGATAAGCTACTGCATATGCAAT  
TTC TAGTAATCAGACAGCAGGGTGTCTCTTCTGTTAA TAAA GTATTGATTTCCCC TTTAGTAGAGATT  
GCTTCGGAGTATTATCTTGCATCGTCATCGATA GAAA ACATCGTTGTCCTGTATTATGCTATC TAAA G  
CAGGAGGTGTGGATATCGAGGAAGTCGCA GAAA AGCAGCCGGATCAGCTGCT TAAA ATGACACTACCTTC  
TTCTG GAAAAA TTTA TGGGTATCAGTTACGCCGTATTGCTAAGTTCATGGAGTGGGATCAACCTATTGCC  
GATCAAGGGAATCGTATCATTGCCAGTTATTACAATGTT TTTA T GAAA AGGATGCTTC TTTA TTAGAGA  
TTAATCCATTGGTACTTAC TAAA GACGGGTCTCTTGTATTCTGGATGC CAAA ATGACGATTGATGACAA  
TGCTC TTTA TCACATCCTGAGCTAGCAGACTGCTATGATCCTTCTCAG GAAA ATATTCGTGACGTACTA  
GCTAAGCAGTTAGGCC TTTT CATACTGCTCTAGATGGAACAATCGGATGTTTA GTCAATGGTGCAGGAT  
TAGCGATGAGCACCTTAGATATTCTGAAGTTATATGGCGGTTCTGCTGCCAATTTTCTTAGATGTAGGAGG  
AAGTGTCTTCT GAAA AG CAAA ATTCAAGAAGCTATCTC TTTA GTCTTATCTGA TAAA AGTGTGCGCTGCTC  
TTTA TCCATATT TTTG GGGGGATTATGGATTGTGCAGTCGTCGCTTCTGGACTTG TTTCTGCTATGCAAG  
GACA GAAAGAAA CGATCCCTACTGTAATTCGGTTAGAAGGGACGAATGTAGA TAAA G GAAA GGGCATGAT  
TATTAACGCAGGAATTCCTTGTGAGTTCGTTACATCCATGAGCGAGGGGGCTGAACTCGCTGTGCAATTA  
AGTCGTTAGCTGGGAGA GAAA CTGTGTTAGAATTATTAAGCAAGGA TTTA CCGATTATTACACAGGGTAT  
TACAGG GAAAGCAGGGTCT TTTT CACTACACAATGTGTGCTTACGGATCTAAC TTTGTTGGAGGAGTT  
ACTCCAG GAAA GGGTGGGAGCCAAT TTTAGACTTACCCATT TTTG ATTCTGT TTTG GAGGCTAAGCAAG  
CAACAGTTGTGCTGCTTCGATGATT TTTG TGCCGCCACCG TTTG CTGCAGAAGCCAT TTTT GAAGCTGA  
AGATGCTGGAATTGAGCTGATAGTCTGTATCACAGAAGGAATCCAATCAAGGATATGCTTGAAGTAGCT  
TCTCTTATG GAAA AGAGCGCAAGCTC TTTA ATTGGGC CAAA CTGTCCTGGAGTGATCAAGCCTGGAG TTT  
GTAAA ATTGGCATCATGCCTGGGTATATCCACCTTCTGGGAAGGTAGGAGTGG TTTT TAGATCAGGTAC  
ACTTACGTATGAGGCTG TTTG GCAACTTACG CAAA GAAA GATCGGACAGAGTGTGTATCGGTATCGGA  
GGGATCC TTTAAA TGCCACATCT TTTA TCATGCTCTCCAAGAG TTTGAAA AGGATAGC CAAA CAGAAG  
CTGTTCTTATGATTGGAGAGATTGGTGGAAAGCGCTGAAGAGGAAGCTGCAGATTGGATACGTCAACATAG  
TAGTAAGCCTGTGATTGCATTTA TTGCAGGAGCTACGGCTCC CAAA GG GAAA CGTATGGGACATGCAGGA  
GCTATTA TTTT CAGG GAAA AGTGGGGATGCT TTTA G CAAA CAAGAAGC TTTGAGACAGGCAGGGGTACC  
TTGTAGAATCTCCTGCACTGATTGGAGAGGCGGTTGCATCCGTTT TAAA ACCACGTTAGTTTT TTTA GATT  
GGAGAATCATCAGAGTAGTCTCCTTGA TTTG CATCATTAGAT TTTG TATGCTGCATATCTGCTTGTATG  
GTGCA TAAA AT GAAA AAAAAAGGGCC TAGACGCCAGATCGCTTATCAAG GAAA AGATGAT GAAA AGAT  
TATTATGTGTGTTGCTATCGACATCAGT TTTT CTTCGCCAATGCTAGGCTATAGTGCCT CAAA GAAA GA  
TTCTAAGGCTGATA TTTG TCTTGCAGTATCTCAGGAGATCAAGAGG TTTT ACAAGAAGATCTGCT CAAA  
GAAGTATCCCGAGGAT TTTT TCGGGTCTGCTGCTAAGGCAACCGCTGGAGTTGTATATATA GAAA AT TTTT  
CTAAA ACAGGGAACAGGCTATTGCTTCTCCAG GAAA CAAA AGAGGCT TTTT AAGAGAACCCT TTTG ATTA  
TTTTA ATGACGAATTT TTTA ATCGATTT TTTG GGTGCTTTCGTATAGAGAGCAGCAGCTCCGCGAGCAG  
CGTGATGCTGTAAGAGGAAC TGGGTT CATTG TTTT TGAAGATGGTTATGTTGTTACTAACCATCATGTAG  
TCGAGGATGCAG GAAA AATTCATGTTACTCTCCACGATGGA CAAA AATACACAGCTAAGATCGTGGGGTT  
AGATC CAAA AACAGATCTTGCTGTGAT CAAA ATTCAAGCAGAGAAA TTACCATT TTTG ACT TTTG GGAAT  
TCTGATCAGCTGCAGATAGGTGACTGGGCTATTGCTATTG GAAA TCCT TTTG GATTGCAAGCAACGGTCA  
CTGTCGGGGTCTTAGTGC TAAA GGAA GAAA TCAGCTACATATTGTAGAT TTTT GAAGAC TTTA TT CAAA  
AGATGCTGCCATTAATCCTGGGAATTCAGGCGGTCATTGT TAAA CATCAATGGTCAAGTTATCGGGGTT  
AATACTGCCATTGTCAGTGGTAGCGGGGGATATATTGGAATAGGG TTTG CTATTCTTAGCTTGATGGC TA  
AACGAGTCATTGATCAATTGATTAGTGATGGGCAGGTAACAAGAGGCTT TTTG GGAGTTACCTTGCAACC  
GATAGATTCTGAATTGGCTACTTGTTA CAAA TTG GAAA AAGTGTACGGAGC TTTG GTGACGGATGTTGT T  
AAA GGTCTCCAGCA GAAA AAGCGGGCTGCGCCAAGAAGATGTCATTGTGGCTTACAATG GAAA AGAAG  
TAGAGTC TTTG AGTGC GTTGC GTAATGCCATTTT CTAATGATGCCAGGGACTCGTGTTAT TTTAAA AT  
CGTTCGTGAAGG GAAA ACAATCGAGATACCTGTGACGGTTACACAGATCCCAACAGAGGATGGCG TTTT CA  
GCGTTGCAGAAGATGGGAGTCCGTGTT CAGAACAT TACTCCA GAAA TTTG TAA GAAA CTGGATTTGCCAG  
CAGATACCCGAGGGATTCTGGTAGTTGCTGTGGAGGCAGGCTCGCTGCAGCTTCTGCAGGCGTCTGCTCC  
TGGACAGCTTATCTTAGCGGTGAATAGGCAGCGAGTCGCTTCCGTTGAAGAGT TAAA TCAGGT TTTG AAA  
AACTC GAAA GGAGAGAATGTTCTCCTTATGG TTTT TCAAGGAGATGTGGTGCATTCATCGTCTT GAAA  
CAGACGAGTAGTCTTGGCCTTATAT TTTA GGAAGCTAGTCTAGTATGGGGACTCAATCGAGTCCCTTTTT  
TT TTTA ATAAGAGAAGCCTTCAGAAA GAATA TTTG TGTGGATATAAGAGCTTAACCATGTAGGCTGTCT T  
TTTCTTATTGTTAGGTA GAAAC GAAA TAGGGGAGAG CAAA CAACTTCTCTATTATAGAAGATTGAGTGGGA

TATGAAA ACTGGGATACTATAGAAATTTGTAGTCAAGTTGAGTCAGGATCTTCCCAGATCGAGAGC  
AAGCTAATTGAAGTGAACATACTCCGACCGGGCAACGATCATGATGATCGTGAATGATGATGATGAAA  
ATGTGTTCAATATTTCTTTTCGGACTTGCCCCGAAGATTCTAGTGGAGTGGCTCACGTACTCGAGCATAT  
GGCCTTATGTGGGCTGAGAGTTACCCAATTCGGGATCCTTTTTCTCAATGACAAGACGTAGTTTAAAT  
ACCTTCATGAATGCGTTCACAGGGGCTGATTTTCACTTGTATCTCTGCGGCTTCTCAGATAACCAGAAGATT  
TTTATAACTACTCAGTGTGTATATTGATGCCGTTTTCATCCGTTGTTAACAGAGAACAGCTTTTTCGA  
AGAAGCTTGGAGATATGAACGGACAGAGGAAGGAAATCTCTCTTACACTGGGATCGTCTTCAATGAAATG  
AAAGGGGC TTTGATGTCGGGAGAATCTCGGCTCAGCGAAGCGATGAATGCCGCATTTGTTCCCTTCGGTCA  
CTTACGGTGTAATTCGGGAGGAGATCC TAAAGCAATTGTTTCGCTGAA TTTAGAAA CCGTCCGCGCTTT  
TTATGAAAGTCAGTATACGCTCAGTCGTTGTCTTT TTTATT TTTATGGGAATAT TAAA CTTAGCCGTCAT  
TTAGATTTCTTAGAGGAGAAATTGCTGAGACGTGTAGGGAAGGTAGAGAAG CAAA GTGTAACCTTTCCTC  
TGCAGAAACGTTTCAAAGAACCTGTACGTGTGATTGAAAGATAACCTTCCGATGGGGCAGATGAAGATAA  
GGTGCTTTTGGATTAGCTTGGCTTACTTGTTCAAATTTTGTATCAGCAAGATCTTCTTGCTTTA CATGTT  
CTGGATCTAGTTTAAATGGGAACGGATGCAGCTCC TTTGAAA TCTCGATTGCTGAAATCTGGATTATGTA  
AGCAAGTTGATATGAGTATTGACAGCGAACTTCATGAGATCCCTGTATATATTG TTTGTAAGGGATGTTT  
TCATTCAGGAAGTCA GAAACTG GAAAGTCTAAT TTTAGCTAGTTTAGAGGAGATCCTTCAAGAGGGAATT  
CCGATGCA TTTAGTTGAAGGAGCTGTGCATCAGCTAGAATTAGCAAGGAAGGAGATCGCAGGGTATTCTA  
TTCCCTTATGGATTATCATTGTT TTTTCGAGCAGGTCTACTAAGACAGCATGGAGG GAAAGCGGAGGATGG  
GTTAAGAATCCATAC TTTGTTTGCTAACTTGCAGAGAGAATATC CAAAAGCCAGATTATCTACCAGATTG  
GTGCGGAAGTATTTCTTAGATAACCCGCATTATGCTCGCGTCATC TTTCTCCCAGATTCTCAGTTGATTG  
CCCAAGAGAATAAAGAAGAACGTAATGTTCTACACACAATT CAAATG CAAATGAGTGAGGAAGAATTAGA  
GAGAGTAGAGGCAGTTTCTAAGCG TTTAGAAAGCATATCAGTCGCAAGAAGAAGATTTGAATAAAGTGTTA  
CCTCTA TTTGCTTTTGACAAA GTTCTTCCCTTAGG GAAAGAG TTTGTGTTAGAGAAAGAAGTATTTGCAG  
AAGGTGAAGTTCTTCATCATGACTG TTTCACTAATGATATTATT TTTGTGGAACCTCGTT TTTGATCTTCC  
AGCTC TTTTCGGCGGAAGAATTGCCATGGTTACGCTTCTCGTT TTTGTTCTGTTACAGTTGGGAAGTGGG  
AATCGCTCTTACAAGAGACTTGGAA TTTCTTTTAGAGCATACTGGTGGAGTGGATGTCC TTTATGAGT  
TCTCTTCTCAAGCTACAGATACTGATCGACTCTCACCCTCGATCAGTATCCGTGGTAAGGC TTTGATCTC  
CAAGCAGAGTATCTGTTCCAAGTCATAAGAGAAA CTTTAAACAACAGTAGATTTTC TCGGATATTGCGAGA  
CTCAAAGAGCTTTTAAATGCAGCATGCAGAGTCTCTAA CAAATAGCGTGAGAAA TAGCCCAATGGGATATG  
CGGTTAG TTTGCGCTGCTGCAATAAA TCTATTGCGGGAGGCTTAGCATATCAGATGGCAGGACTTCCTTA  
TGCAAGTATATCCGAGAGCTGCTCAGTAAT TTTGACTCTCAAGCACAG GAAAT TATAGATCGGTTG CAA  
ACGCTTTATAAAGAAGTGT TTTGTTGGAAGACGGCAGCTTGTTCATCAGTAGTAG TAAAGCTAATTATCAAG  
TTCTACATGATCAGCGATTTT TTTGTTTATTAGATGAGAGATTAGAGGGTGGAGAGCTCTG GAAA AATCC  
TGTCTTGATGTGCTG GAAAGATTCTCGAGGCATTGTAATCCCCGCTCGAGGAGCTTACAATGTATGGCA  
TTTCTCTAGGCTCACTTGTATTGATCATCCAGATGCCGCAGTTC TTTCTGTTGCAGCAGAGGT TTTGG  
GGAATGTCATTTTACATGCT TAAATTCGTGAGCAAGGAGGCGCTTACGGCTCTGGCGCTAGTG CAAACCT  
AGGGCGAGGTGCTTTTATTGCTATAGCTACCGAGATCCGGAAGTGGCTACTACCTATCAGGTATTGCTC  
CAAGGAATTCGTGATATGGCTGCGGGAGATTTCTCAGAAGAGGATGTGCATGAAGGAATTCCTTGGTGTTA  
TTCAGAA TTTAGATGATCCGATTTCTCCAGGAAGTCTGGATCTGCATCCTACTATCGTTCGCGGAGCGG  
TAAGGTGCC TTTCTGTTGTCGTAAGCTTTTCGTCAGGCTGTGTTATCTACAAC TAAAGCA CAAATTTG TGAG  
GTTGTACGTAATCGTCTTGAAGGATGCC TTTCCGAAGCCTCATTTGTTTCTTTTGTGCTGGAGAA GAAATGC  
TACA GAAAAGCGCT TAAAGAGCTTAATGAAGCATT CAAATAGAGGCTGCATTTTAAATAAAAC CAAAAGT  
TATTGG TTTGAGGAAGGAGGCTTCAGATAAGAAGCCTCTGGGGATAAGCATTCTGCCAGATCGCTTTTCGG  
GACAAGGAACCTTCGGAGAATGAGGTAGGGTGTCTACCTGAGAGAGTGTTCGAT TTTATTGTGGGAAGA  
AGAGAGCTCTAG TTTGT CAAAAGTTCGAGGATAGGGAGA ACTCTAGCAGAAA GACTAGAAGACATGTCA  
TTATAGCTATGAACAGCTTGCCCTAAGTG TTTGCCTACCTTATG GAAATGGT CAAACAG TTTATGCAATC  
TTTGATAGAGGTCT TTTCTAGTTGTCCAATTTCTCGAATCTGAT TTTGTAAA TTTCTTGT TTTCCAAAC  
ATGTGTGACCGTT TTTAATAAAAGCCAT TAAAGTCAACAGGGCTG GAAAGAATCACATTAGATTGTCTGCA  
TAGTCCATTAGTTCAGGAGCACAGCGAATAGCATCAT TAAATAAAC TTTCTCCAGGAA GAAA GAGAATGA  
CAAA TFCAGGGGACTGCTCGA ACTTATCCCAATAGCT TTTGGT TTTAAGAGT TTTAATATGGTCT TTTAT  
TTTT TTTACTAGATCAGTAGGATCCGCGTGATTATCCGTAAGGTACTCTTCAGAAA ATGGAGT TTTAGCA  
TCAATAACTAGACTGCGAT TTTGCGG CAAACGAATGACAATGTCTGCTCGAGAAGAAGACTCACTGGAGT  
CTACTG TTTGCGTGCTGTAGTCACAGTA TTTCAACATGCCG GAAATTTCAAGGATTCCTCTAGTTGAAT

TTCACCCCATCTTCCACGAGATCCAGGATGTTTCAAAATATTGGTAAGAGCCTGTGTTTCCTCGCTCTAAC  
TTCTGTTCTGCAGTGAGTAATTGAGAGAGTTGTTCTTTGAGAGCTCCGCGGTCTTCGGCTTGCTTAGTTT  
CAAAATTTTCTAAGTTTTGTGTTGAAAGCAGATAAGGTATTATGCACCGGAGCAAGAACAGAGGTAATGGC  
TTGAGTTTTCACAGAAAAGAATTCTTGAGATTCTGTCTTCATGTCTCTAGCAAAAGCCTGGGATACCGAA  
GTCAGTTTATGAGAGAACTCCTCCATAA TTTGTTCTTGACTTCGGCGAGTATCTAAAAGACATTTGTAGAA  
TAGCCTTGCTATGCTCCAGATCACGAATGATTTCTGTATTGTCCGGATAGCTTTTGTGTTGAAAATTTTAAA  
GGAGAAGAGCACTCCAGCGCTATTCCTAATGAAAAGAATGTAAGGTATAGACACACAGTTTGCAGACAGC  
AAAGAAA TAGCGAAGACACCCATATACTAAGAAGAAGATCTTTTATTAA TAAAGGAAA AAACAGGAGCAA  
CAACTAGCACGTATAACCAAGAGACAAGGAAAATACTTGTGTGAAATGGTCCACTAGTCCCAGAGAAGAA  
GAGACAAGCCACTAACCCGATTCCAGAAC TAAAAGCGATGAGGAAACGC GAAAATGGAAGTGT TTTAAT  
CCAGG GAAAAGCCAGGTG GAAATCAT TAAACAGCCACTGAGTAATAGGCCGAGAGAGACGAGAAGAACC  
GAGCTCGTTTCAGGAAGGCTGTTCAAGGTATCAGAGGCTAGTAGCACGCC TAAAAGAGACTACACATGCTGC  
AGCGGCAGGAATAGGAAGTCTGT TAAAAGTAGTTGCTTTTTC TCCCGTAGCGG CAAAAGAGATTATAGCGT  
ACTAAGCGAAGTACTCCACACAGAGAGTAGATGATACAAGTACCAGGAGGAAAAGAGAACAAAAGGTTT  
CGCCGATTCTCCATTCAAGCTTTTAAATCGCAAT TAAAGGAGGCGCTATGC CAAAAGTGATAGCGTCAGA  
CAAA GAATCGAAGTGAGCACC GAAAAGCAC TTTCCGC TTTCCATAATTCGTGCGACAGTCCATCC GAAAAA  
TCTGCAATCATAGCGCTAATAAGGAGTAGAGAGAGCCCTGTAAGCGGTGCATGAGTCTAGTGAAGAGG  
AAGT TTTCAACACGCTTTTGAATAA TAAAAGAGTCCGCAG CAAAAGAC CAAAAGCTGTAATGGCATTAGG  
GGTCAACTCGGCGCTTACCACGAAGGTCTA TTTCAATTCGATTCATATCTTCCTCAGGAATCGCGGAA  
ATTTATTACAGAAA TCAGTGGGGCTTAG TTTATTTT TTTGTAGAGAAGCTTCTTT TTTATGGCGTGAATTT  
GCATTTATGCAAA CAAATATACATCTCC TTTGACTTGGAACTTTCTAGTGC CAAAAGGAC TAAAAGCGGC  
ATATTT TTTACATC TTTCTTTGTAAA GCCTAAGGTGATGTTACACAAAACATGT TTTCCGGCACTACACAG  
AAA ACCCACAGATAGTTATGGTTATTGCGTGT TTTCCCTGAGCAAGT GAAAAGATAGAGAGGTAAGCTGC  
TTCTTT TTTGCAAGAAA AAAAGCACAAA AAAGCTAGATGT TTTATGTAGGACATCATGCT TAAAAG TTTG  
TCTC GAAAAGAAA TTTTTCATCGCAG TTTATGCTATT TTTCAATTGCAG GAAAAGCTTGCTAGCTTCTATA  
TATGGTATACAAGAGCCGAGACATTCACAATATCTTGGGTT TTTAGGGGCTCACATACT CAAAAGGATAAT  
ACTCTGATT TTTAAGTATAAGATAAGGGCTCTCTCTACCCTTTT TTTGACGGATAGGGGACTAGAGGG  
TCT TTTGCTT CAAAATAGAGAATAATGCGTATTCAATG TTTACAAGGATAGTTATGGTCGATCTACAAGAA  
AAGCAATGCACAATTGTTAAGCGCAATGGAATG TTTGTTCC TTTGATCGGAACCGTATTTTTCAGGCTT  
TAGAAGCAGCTTTTCGAGACACTCGCAGAATTGATGATCATATGCC TTTGCCTGAAGATCTGGAAA GTTC  
CATACGCTCGATAACGCATCAGGTAGT TAAAAGAAAGTTGTG CAAAAGATTACAGATGGACAAGTGGTTACT  
GTAGAGCGTATCCAAGATATGGTT GAAAGCCAATATATGTGAATGG TTTGCAAGATGTTGCTCGCGATT  
ATATTGTCTATCGCGATGACCG TAAAAGCGCATCG GAAAATAATGG CAAAGCCTATCCGTTGTTCGTCG  
TTGTGGGACTGTTGTACAC TTTAATCCTAT GAAAATTTCCGCGCTTTTGGAAAAGC TTTCCGAGCTACC  
GATAAGACTGAGGGGATGACTCCAAGTCTGTGCGAGAG GAAATCAATGCTTTGACG CAAAACATTTGTCG  
CG GAAA TAGAAGAATGTTGTTCTCAACAGGATAGACGCATTGATATCGAGAAGATTCAAGATATTGTTGA  
ACAGCAACTAATGGTTGTTGGGCATTATGCTATTG CAAAAGAACTATATCTTTA TCGAGAAGCTCGCGCT  
CGTGTTCGTGATAACAGAGAAGAGGACGGGAGTACA GAAAAGACTATAGCAGAAGAAGCTTTTGAGGTGC  
TCAG TAAAAGACGGTCTACCTATACAATGACGCATTCGCAGTTGTTGGCTCATTTAGCGCGCGCTTGTAG  
TCGT TTTCCAGAAA CGACAGATGCGGCGCTGCTTACCGATATGGC TTTCCG CAAATTTCTATTCCGGCATC  
AAA GAGTCTGAAGTAGTACTGGCTGTATTATGGCGGCTCGTGCCAATATT GAAAAGGAGCCTGATTATG  
CCTTGGTTGCTGCAGAGCTCTTACTTGACGTTGTATATAAGGAAGCGTTAGG GAAA TC GAAAATATGCTGA  
GGA TTTAGAACAAGCACATCGCGATCA TTTCAAA CGCTACATCGCAGAAGGGGATACCTATCGTCTGAAT  
GCTGAACT GAAAACATCTTT TTTGATTTA GATGCGTTAGCCGATGCTATGGATCTATCTCGAGATCTACAGT  
TTTC TTACATGGGTATT CAAAATCTGTATGATCGTTAT TTTAATCACCACGAAGGTTGCCG TTTAGAAA  
TCCC CAAATTT TTTGATGCGCGTTGCTATGGGGTTGGCATTGAATGAGCAAGACAAGACTTCTTGGGCT  
ATTACTTT TTTATAA TTTGCTTTCCGACATTCAGATATACACCAGCTACGCCAACCCTGTTCAATTCAGGTA  
TGCGGCATTCTCAGTTAAGCTCTTGTATCT TTTCCACTGTACAAGATGA TTTGGTCAATATCTATAAGGT  
CATTGCTGATAACGCTATGCTATCTAAGTGGCAGGAGGGATAGGTAATGATTGGACGGCGATTCGTGCA  
ACAGGGGC TTTAAT TAAAAGGAACCAATGGAAGAAGTCAGGGAGTAATTCCT TTTATTAAAGGTGA CAAATG  
ATACAGCAGTGCAGTGAATCAAGGTGG TAAAAGCAAGGGAGCTGTATGCGTCTA TTTAGAAAG TTTGGCA  
CCTCGACTACGAAGA TTTCTTTGAATTGAGAAA GAATACAGGGGATGAGCGTGCAGGGGCTCATGATGTC  
AATACAGCTAGCTGGATTCCAGATCT TTTCTT CAAACG TTTA CAG CAAA AAGGGACATGGACTCTATTCA

GCCAGATGATGTTCCGGGATTACACGATGCTTATGGGGAAGAA TTTGAGCGTTTG TACGAAGAATATGA  
GCGGAAGGTTGATACCGGAGAGATTCGGTTATTCAAGAAGGTAGAAGCTGAAGATCTGTGGA GAAA AATG  
CTCAGCATGGTT TTTGAAACGGGACACCCATGGATGACT TTTAAA GATCCATCCAACATCCGTTCCGGCTC  
AAGATCA TAAAGGCGTGGTGCCTTGTCCAATCTGTGTACGGAGAT TTTGT TAAA CTGCTCGGAGACAGA  
AACTGCTGTTTG TAA TTTAGGATCGATTAACCTAGTTCAACATATCGTAGGGGATGGGTAGATGAG GAA  
AACTCTCTGAGACGATCTCTATAGCAGTCCGTATGTTGGATAACGTGATTGATATTAAC TTTA TCCAA  
CAAA GGAAGCTAAA GAGGCGAAC TTTG CTCACCGCGCTATTGGATTAGGGGTGATGGGATTCCAAGATGC  
CTTGATAAGCTAGATATAAGCTATGCTTCGCAAGAAGCTGTAGAA TTTG CTGACTACAGTTCAGAGTTG  
A TTTCTTACTATGCGATTCAAGCTTCTTGTCTGCTCGC TAAA GAACGAGGCACTTACAGCTCTTA TAAAG  
GATC GAAATGGGATAGAG TTTG CTCCTATTGATACGATTCAAGTTGTTAGCGAACTATCGAGGAGAAGC  
AAA TCTCCAGATGGATACGTCA TAAAAGATTGGGAACCTATCCGTAG TTTG GT TAAA GAGCATGGT  
ATGCGACATTGTCAGCTTATGGCTATAGCTCCGACAGCGACGATCTCCAACATTATAGGAGTAACTCAAT  
CTATTGAGCCAACGTA CAAACAT TTTG TTTG TGAAGTCTAAT TTTG TCCGGAGAATTCACGATTC CAAA TGT  
GTAT TTTAATTGAGAAGTTGAA GAAA TTAGGTATCTGGGATGCTGATATGTTAGATGACC TAAA ATAT TTT  
GATGGGTC TTTA TTG GAAATCGAGCGTATACCAGATCACT TAAA ACATAT TTTCTT GACAGCT TTTGAGA  
TTGAACCAGAATGGATTATCGAATGCGCGTCTCGAAGA CAAA AATGGATTGATATGGGGCAATCCCTCAA  
CC TTTA TCTTGCCAGCCAGACGG GAAA AACTGTCAATATGTA TTTAACGGCTTG GAAA AAAG TTTG  
AAA ACTACGTATTATCTGAGATCTTCATCAGCAACGACCGTT GAAA AATCT TTTG TAGATATTAATAAGA  
GAGGAATTCAGCCTCGTTGGATGAAGAATAAGTCTGCTTCGGCAGGAATTATTGTT GAAAGAGCGAAGAA  
AGCACCTGTCTGTT TTTG GAAGAAGGGTGTGAAGCATGTCAGTAATTAATCATA TAAATTAACAA TAAA  
ATTAACGGTTCCTATGCAAGCAGATAT TTTAGATG GAAA ACAGAAA CGCGTTAATC TAAATAGCAAGCGT  
CTAGTGAACGCAACCAGGTCGATGTCAACCAACTGTTTCTTATTAAGTACAAA TGGGCTTGGGAACATT  
ATTTGAATGGCTGCG CAAA TAACTGGCTCCCTACAGAGATCCCATGGG GAAA GACATCGAATTATGGAA  
GTCGGATCGTC TTTCTGAAGATGAGCGCGAGTCA TTTCT TTTG AA TTTAGGTTT TTTCTAGCACCGCAGAG  
AGCTTGGTTGGGAATAATATTGTTCTAGCAATT TTTAAA CATGTAAC TAATCCGGAAGCGAGACAATATC  
TTTTAAGACAAGCT TTTGAAGAAGCGGTTACACGACACACATT TTTGTATA TTTGTGAGTCACTCGGATT  
AGACGA GAAAGAAAT TTTCAATGCCTATAACGAGCGTGTGCGATTAAAGGC CAAA GATGATTTTC CAGATG  
GAAA TCACTGGCAAGGTATTAGATCC TAAT TTTCTGCACGGACTCTGTTGAGGGTCTACAGGAG TTTGTTA  
AAA ACTTAGTAGGATACTACATCATTATGGAAGGGAT TTTCTTCTATAGTGGG TTTGTGATGATCC TTTCT  
CTTCCACAGACAAA ATAAGATGATTGGTATTGGAGAACAATATCAATACATCTTAAGAGATGAGACAATC  
CACTTGAAC TTTGGTATTGATTTGATCAACGGGA TAAA AGAAGAGAACC CGGAGATTTGGACTCCAGAGT  
TACAGCAAGAAA TTGTCGAATTAATTAAGCGAGCTGTCGATTTAGAAA TTGAGTATGCGCAAGACTGTCT  
CCCTAGAGGGAT TTTGGGATTGAGAGCTTCGATGTTTCATCGATTATGTGCAGCATATTGCAGACCGTCTG  
TTGGAAA GAATCGGAT TAAAACCTA TTTATCATA C GAAA AACCATTCCCTTGGATGAGC GAAA CAATAG  
ACCTTAA TAAAGAGAAA AACTTCT TTTGAAA CAAGGGTTACAGAATATCAACATGCAGCAAGCTTAACTG  
GTAGTCCGTGATAT CAAA ATAGGA GAAA GCCTCAACCATAGAGTTGAGGCTTTTT TTTGTCATACGGCAAC  
CTGATAAGAATT TTTAGAT TTTCAAGTTAGAAG TAAA TGTATTTA CCCATGAATTTTT TTTAAT TTTCTC  
ATAATATCTTGTAGCCCT TTTAT TAAA ATG GAAA AGGCTAGTCACTCTCCTATGACTACTGTTAGAGTG  
GTGAGG TTTGGGGTGGAGCAGGTGTAGCC TTTCTGCATACGAAGTAT TTTCTCTGT GAAA ACCACAAGATTT  
GAAA CTCCCTATT TTTGGGAAGAACGCTCTCCT CAAA TAG CAAA CCATGTAT TTTATGTACCCAATTAC  
TATCTCGATACGAAGAG TTTGTAATGCCTACTTGGCAAGAGTTA TTTGCTAATAATGGCCCTA TTTGTT  
GTGAGTTATGCTCAGGGAATGGGATTTGGTAGTGGAAACAAGCAT TAAAAGATGCTTCCGTTAATTGGAT  
TGCTGTT GAAA AACGT TTTGATCGGGTCCGTAAGA TTTGGT C GAAA ATGGGTAATTATCGCGTGAATAAT  
CTGCTTATTGTCTGTGGAGAAGCT CAAA CCTTTT TTTCCATTATGTATCAGATGCATCG TTTCAAAA  
TTGTAGTCAAT TTTCCAGATCCTTGGCCTAAG TTTCCGCATCG GAAA CATCGGCTA TTTCAAGATCTTT  
CGTTCAAGACATGATGCGTACTCTAGTAGTTGGTGGGCAATTAACCTTTGCAACAGACGATTATAACTAT  
CTGG TAAA TGCGATTACAGTGATGTTGAAGTACC TTTCTCCAGGTC TAAAGAGCCCTCATTACATCAATG  
T CAAA GACAATTACGGAGGATCCTGGTTC GAAA ATTTA TGGAGATC TAAAGGACAGGAGAT TTTCTGTAC  
GGAATTCATCAAGAGAGTTGGGATATAGCTGACTTGAACAGCTGACCTTCACGATGTCAACGTGACGCTC  
TAACCAACTGAGCTAATACCCCATGTGACTCGCATCC TTTATAAAA TGATGTGGGATCTTTTTTTCAAGAGG  
CTTATGATGTTAACAGGGATAGATATACTTT TTTA GTAACATAATCAAGCTGTCTCATTCTATT TTTCTGAC  
AGGTGGTTGAGCCAGGAGATACTATTGTTGATGCAACCTGTG GAAA TGG TAAA GATGC TTTGTTCTTGGC  
TCAGTTATTACGAGG GAAA GGTG TTTGGTTG TTTACGATATTCACAAGAGGC TTTGGATCGAGCAACC

GCTAAC TTTCAAACGCGGTTATTAGCTGAGGAACGAGCGATTATTGAGATGAAGCTCTGTTACATGAAT  
ATCTTCAAGAGCAGGGAGCTAAGCTC TTTCAATTATAA TTTAGGATA TTTGCCTAGCGGAGATAAGCAGAT  
TACTACATGTAGCGAGTCCACAGTTACCAGTATCTA CAAAGCATTAGAATTAGTCGCTCCTTCAGGAATA  
GTCAGTGTG TTTG TTATCCTGGGCATCAAGAAGGAGCCGAGAGTTATGTTGTGTGGAGCAAGTGGCTA  
CGGATCTAGATCCAAGTATGTGGGAAGTATGCACCCACTATTCTG TAAATAGAAGGAATGCTCCTAGGTT  
A TTTTC TT TTTTC GCAGACGACAAGGCTAGAGGC GAAA GGGGATGATACGGACTTC TTTA TGTAAG GAAA TA  
CCTTGTTT TTTAAGAGT TTTG AATGATCTCGATAAGCTCTAGGATGTCTGCGGTACAGGCAT TTTCCGG  
TATTAATAAT GAAA TTGCCATGTT TTTCA GATATCTGCCCGCTCCTATCTTCAACCCT TTTAATCCAGC  
TCGATCAATAAGTGTCTCTGCAGACAAGCCTTCAGGATTCGGGAAGATACAGCCTGCGGAAGGGTATTTCG  
TAGGGTTGT TTTA GAATGCGTTCTTCTAT TAAA GC TTTAGCTCG TTTAGCAGCCTGAGGATCCTTAGTTA  
GCT GAAA TGTCGTGAGGCAAT TAAA AGCTGGTTTT TTTGAAA AGGGGAAGTCCGATAG GAAA AAAAGAAG  
CT TTTCCCTAGGTATC GAAAG TAAA ATTCTGAATGGTCAATAA TTTCTACGTTGATGAGAGAAGAGGCT  
GTGTTAGCTAGAGTAGTGCCAGCATTCA TAAA CACAGCTCCACCAACGGTTCTTGGGATTCTTACGG CAA  
ATTCTAATCCC GAAA ATCCTTGAGAA GAAAGCCTCTTCCCTAACAGAG CAAA GGAAGATCCT GAAA GGAC  
CTTGAT TTTGTGTATCCGAGAGGAACTCTTGTCTTGGATATTATTATACAAGACAAGGCCAT CAAA TCCT  
TGATCAT CAAA AAGGCAATTGGATCCT TTTCCAATAATAATATAGGGCAAGGGGTGGGTGTGGAGATAGG  
AAAAGACGGT TAAA GCCTCACT CAAA GAGGTTAATTCCT TAAA GTAGCGAGCAGGCCCTCCAATGC GAAA  
AGTG GAAA AGCGGCTTAATGGAACAGATTCTTGAACA GAAA AAGG GAAA GAGTCGGT CATGGGATATACA  
ATG CAAA AGTTGACTGTTCAAGGGAAGCGACACAAGCCCAAGATATCTTGGACGGAGTCGCTTCCCTTAC  
TCTGTCAATTCTAATGTGATAGATGGTAATGC TAAA GA TAAA AATATAGGTAT TTTA ACCACACATAGAAGT  
GGGCTCGAGAGGAGTATCTAAGGCTGGGGCTGGGTGGT CAAA AATAGAACC CAAA ACGGCAAGGATAAGA  
GAACTTCTTCCGAATAAC TAAA TTT TTTAATAAGGCGAGTCG TTTCTGCTATTAGAACGGCTACAGGAA  
CAGGACAGCAATCTTGGT TTTG TTGATGCT CAAA GAGCATCATACGAAGAATATTGCGTTCGATAATCGT  
TAAGCGAGCAAGAGTTGTGGTTCGAATGGTCGCATCGAG CAAA GCATCTAGATCAGGCTGGTTCGCTCGA  
ATTGCTCGA CAAA ACATCAAGGCGTAAGCAGCATTCTTT TTTGAAA CAGAAGCTTCGGTCATCAGCAGGC  
TAACGAGAGAATCCTCTCCTTCTGGATCTAT TTTCCAGAGCGTATAGCGCCTG TAAA ACGAGCTCGCGTAA  
TT TTTGCT TTTGG GAAA GGTTCGGCTCGCGCAACAGGGGCACAAGC TTTGT CAGAAGCCATTACTGACATG  
ATCACACC TAAA AAGAGTACAACGCTATGCGCCCTGTAATACGAAGGCTCAGCC TTTCTCCT TTTCTTA  
GGGCGC CAAA ATGGAAGGAAGGCCCGAGTATATATGAGTCATTATT TTTAT GAAA GAGCGGACCTGCTT  
ACCAGGGGCGATCGAGAGTTTT TTTGAAA TAAA AAAATGTT TTTG TATGAAGGTT CAAA AGGTCTACACAT  
TTCT TCTTATGGAAGAAGGAGTGAAGT TTTAGGCGCAATACTTGATAATAATCCTCATCTATAGGTACCA  
TGTAGAGTCTAGAGCGGAGGCGTCTAGATTATGTCGCAATGC GAAAGATTG TTTAGACCAGAAGGAGA  
AA TCCCTCTTCTTGGGGAAGGGTGGCTTGTGGTTTT TTTAGGCTCTCCGTCAGCGATTACTAAT TTTAG  
CAGGGTAGATGTGGC TTTAAA CCTAAGAA TAAA TAGGCAGATACGAGCTCCTAGGGTACGTGTAATAGGT  
TCCG CAGGAGAGCAGCTAGGCATATTGAGTATAAAA AGAGGCCCTAGA TTTAGCCAAGGAAGCTGA TTTAG  
ACCTTGTGAGGTTGCTT CAAA CT CAGAGCCTCCTGTGTG CAAA ATCATGGACTACGGGAAGTATCGTTA  
CGACATAAC TAAAAA GAAA AAGATAGTAA GAAA GCACAGCACCAAGTGCAT CAAA GAGGTTAAGCTT  
AAGCCTAATATCGATGATAACGAC TTTCTTAC GAAAG CAAA GCAAGCTAGAGCCTTTATTGA GAAA GAA  
ATAAA GTAAA GGTTC TTGTATG TTTCCGGGGCGAGAGTTGGCTTATCCCGAACACGGGCATAAGGTTGT  
T CAAA GAATGTGTCAGGGCTTAGAGGACATAGGT TTTG TTGAGTCAGAGCC TAAA CTGAATGGCCGTTCT  
TTGATCTGTGTTATTGCTCCGGGAACAC TAAAAACTAAGAAAAAACAG GAAA AAGTCCATGCCCAAGATG  
AAAAGCAATAAGTCCGTTGCGGCGG TTTCAA TTGACTGGTTCTGGTCAAT TAAA AAGAACTCGTCCGG  
GGAAA AGACACAAA TTAT CAAA AAGATCTTCGCAACA GAAACGCAACCTGTCTAAA CAGCC TTTAGTGA  
TCAAGGTCAGGTGGGCATGTATAAGCGAATGATGCTCG TTTAAA GATAGAGGGT TTTAGATATGGTAAGA  
GCAACTGGTTCAGTAGCTTCTAGATCGCGTCTG TAAA CCGGT TTTAAA ACAAG CAAA AGGATTCTGGGGAG  
ATAGAAA GGGACAC TTTCTGT CAAA GCCGGTCTCTGTTATGCGGGCTATGGCT TTTA ACTACATGCACC  
AAAAGATCG TAAA GGTGAT TTTCCGAAGCC TTTGGATCACTCG TTTG AATGTGGCTTCCAGAATTCATGGA  
TTGTCTTACAGCCG TTTGATCAATGGTCT CAAA CAAGCTGGTATTCAT TTTAAA TA GAAA AATGTTGTCTG  
AGATGGCTATTTCATGACCCTCAAGGG TTTGCTGTAGTAGCTACTCAAGCTAAA ACTCGCT TTTGGAAGCAGC  
TGTT CAGGGATAGAGT TTTATGACAATTCAAGAGGAACTTGAGGCTGT TAAA CAGCAGTTTA GTTGTGAT  
GTAAGCCTTGCGCATTCCTT TAAA GATCT TTTCCGATGT GAAA GTAAA ATACCTGG GAAA GAAGGGAATCT  
TTCCGCGT TTTGCTGATCAGTTGAGGAAGTGCCCTATAGAGCA GAAA GCGACTGTGGCGCTTCCATTAA  
CGCTTGTAAAGCAATACGTGGAGGAAGT TTTA CTGAGAGAGGCAAGGCCGT TTTG GC TAAA GAAGAAGCA

GAAGAGTTCCTTAAGGAGAAGATAGATATCAGTTTACCCTGGTAGCGAAGAAGCTGCTCTTGGTGGTAAGC  
ATGTTATCAAGAAAATCCTTGTATGATGTTGTAGATATCTTTGTTTCGCTTTTGATTTTGTGTTCCGGGAAGC  
TCCTAATATCGAAAATGAAAAAAACAATTTTCTCTTCTTAAATTTTGAAGAAGATCATCTGCTCGACAG  
ATGCAGGATACTTTCTATTTTGATCCACCACGGTCTTGCCTACGCACACGTCGAATGTGCAGTCTCGGG  
AGTTAGCGAGAAACAAACCTCCTGTTAGAATTGTCGCTCCAGGAGAGTGTTTCGTAATGAAGACGTTTC  
TGCGGTTTCGATGTGATTTTTACCAAGTAGAGGCCTTCTGCGTAGATAAAAGATATTTCTTTTTCAGAC  
TTGACATCGATGTTGGCAGGGTTTACCATATCTTCTTTGGACGCAAGTGGAGTTGCGGTTTAGACACA  
GCTATTTCCCTTTGTCGAGCCAGGGATCGAGGTAGACATTTCTTGTGAATGTCATGGAGCCGGATGTTT  
TTTGTGTAAGCATTCTGGTTGGTTGGAAGTTGCTGGAGCAGGAATGATTCATCCGAATGTCTTGCCTAAG  
GCAAGCTTTGATCCAGAAGAGTATTCTGGGTATGCCCTGGGGATGGGTATAGAGCGTCTCGCGATGCTCA  
AGTATGGTATTTTCGATATTCGATTGTTAGTGAGAACGATTTGCGGTTTTTACGGCAATTTTCTTAAGG  
AAGAATGGCAGAGCGTTTAATGCACCTGTCTTGAACACAGGAGACCTGAAAAGGGTCCGGGGTTCGAAT  
CCCTCTTCTCCGCATTCCTTTTACGAGAACCTTTTGGGGTAAGAGTTGAGGCTCTTCTCTGAAGGGT  
TTTTTTTGTCTTAGTTATTTTGTATAAGCAAAAATAAGCGCTTATAATTTCTTTTATTTAGTTTTTAT  
AAAATAAAATATTTGAAAGCTAATTTTATTTATAAAAATAAACTAGAAGACAATCTTGAATAATAAAAAGA  
CTATTTTCTACTAGCTCTCGGGGAGGCATGAAAAGACTCGTAAGTTTGAAAAGCTTTAGAGAAATTTA  
GAGCAGTAAAAAAGAATTTCTTACGATTATTCCAGTGGGAACGCTGAGGCATCGTCTCACAACAAGGCTC  
TCTCAGAAATGAAGAAGGCTATGCATTATATAGATCACTATTTTCAAGCAAGCAGGAGCTCTCTCTCAAAA  
AGATGTAGATAAAAGTGATTAAGAGACAGACTTTTGGATTGCTGGAGTGCAGGATGTCTTTTCTTTTCTA  
GAGGATCGTAAGAAGAGGTGTACCGGTCTCTGTCTCAAGATTATCGTCATCTGAACCACACTTATGATG  
TAACTCGTGAACATCTGAATAATAAGATGGTAGAGCAAAAGAAATACAAAATGGCTCTTTAGAGAAGCTG  
CCAGGATCGAGAGGAAATTTCTTAATAACCTTGTGCAAGTAAAACGGGATCGTTCTTATGAACATATTCTAC  
ATGGCAAAATGAAGATAATAAGCGGTTTTATACCGATGCTTTAGCGCAAAATATCTATAAGCAAGGAAGA  
TCCATGAGTCGATGCATGAAAATGATCCCTTAACGAAAACAATTTGTGTGGAATAGTGATGAGATCACGAA  
ATTAGCTTCTTCCCTTAGTTTACACGAATGATATGCCAATTCGGTTGTTTTATCAAAAAGCTCTTACGAAT  
ATGAGTGCCGAATTGACGGTGAATGTACATAACGCATTGATGGCTTTGTTTTTTAGCTCGTTATGAAGCTA  
CAGCAGTGAGTCAGCAACCTAGAAAAGAAAATCTCAGTTATTTAATGACTTTTTCATTTTCTAAAGAAA  
AGCTGCAGCGCTTTTGAATGAAAAGATCTTCTTGTATTTACAAGAAAACATTCGAAATCACTAGTATCC  
TCATTGAGCGCTAAAATTATATGATCACACTATTGATTTTGTAGAAGCTGCTAACTATATTTTCTTAAATA  
TCTCTTCAAACTTCAGCCAGAAGAAGGAAAAGCCTTTATCTGCAGGACAGTATGTTGCTGAAATTTA  
TGATGAGTTACATCGATTGTTCTCAAAATATCCTAATGGGCCATTATTCAAAAGCTATAGATAGAATGCTT  
GACCCATACTTGAAGAGTTTGATCCCATTTTATTAGGCATTCTCCCATGCCTGAAGGTAAGCTTATAC  
AAGGAGATAAGGAGATCAAAGTACTTCGTACACCAAGCCCTGTTTCGCAAAAGCTCTATCCTTTATGCTAA  
CTGTAATGGAGAGTCTTACACTTTCATAGATGCAAAACATGTCAGGGAGACAAGATTTTGGTAATCAAT  
ATTCAGAATCGGTTGTCGCAAAAAGATCGTGCAGAGTGCATTTATTGAAGAATCTTTGCAAGATTACT  
CTTCTGTGTATATGAGTGCATTTTCAGAACCAGAAGATTTTTGTATGGATTGGAGCAAGTGCATGGGGA  
ATTAAGAAAGCTTTGCGGATTTCTTTTCTCTCGTACAGCAAGAATTTTCAAACTAAAGCCCAAGGATAC  
TGTGTTCTCCAGAAAGAAATGAAAAGAGCGTATGGGAGTGTCTTAGAAGGTATTGTTCTTCTTTGAAGA  
ACGTTTTCTTCTCAAAGAAAAAATCTTATTCAAAAATGATAAAAGTTTGTCTTCTACATTTAATCTATTA  
CTTTGTTGTTTTTAATCTGATTGAGCAATTGGATCCTAATACGTTAGTAATTATGTCCAAAGATGGGTTA  
GATTATGCATCTGTCTTTGTTTCGCGTTTTCATTTCTTTGAAAATCGAGGAAATGGGATGAAGACAGTT  
TGAAGCGAATGGTTGCTAGAATGTAGCTCCACATTAGTAGCCAGAGATCGGCTAGTATTTGCTCAACA  
TGTGGAATATTGAGTAAGTTTTTGAATTGTTTAAGAAAAATCGCCACAATCTAAAAGACCTGAGAAGC  
CTCTTTTCTATGATTTAGAGGGGTGGCAATTCAGGTATTTAAGCAAGTTTTCGATAAGCAAAAAGG  
TAATAAAAGCATAAAGCCTGCAGGAATAAACATCACCTGGAGAGCCGGTAAGACGCTATTGTTAGCGAG  
AACCATCCAGCTTTCAGAACAACAAAGAAAATATTAATGGTTCCAGAGGGACTAGATATGCCAAGTA  
ATTTTGGGAGCCGATGAAAACGTAAGCAAGATGGGCAGACAGGATCACAGCTGCGATACATAATAGTG  
GCGAGATGAGCATATAGTAAAATAAGGTAAGCAAAAGATAGGATCCTTTGGAGGCACTGTAGTTAATAGCC  
AAATTTCTGCTGCATGCCAAGGAATGGCTTGTAAAAATGCAGAGAAAATACAATCTCTTCTGTTATGAAA  
ATCTTGGAGAAAAGGTTGTCGTAATAGCTGAATTTCAATTCAGGGAATTTTTCATGTCAAAAGAACGTG  
TCAAAAGACACTTCGTGATTTTCATCTTCGAAAAATAGGACACTTCAAGCCGATAGGAAGCGATGGAGT  
AGTAAATGCAAGTTTTTGATTGCATAGATCGTTTAAAGGCCCTTTAATCAAAAACACGTTATTTAGAGTA  
GCGGCTCTGCGATTAATGGAAGAAAATAAGAACAGTTTGGTCTTTTCAGATAGAGCGCAGGGATTTT



CTTGGGCTTTTCTAAAGTGCCTTTGTCATATGCTCTTTAGTTACC GAAATCTTTTCACAAATCGGATG  
GAGCATTG GAAATTCGCATACAGAAGAAGAGTAATTAGGGAAGTAGATATAACTAGTGGACGAAT CAAA  
GT TTTTCAGG GAAAGCCCTGAAGCCTGCAGTAATAGAA TTTCTCTTTTGCTCTGCATG GAAATAGTGTAA  
TTGTCAAGCAATTGCAACGAGTTGAGGGAGAATGAATTCTGCTTTTAGAGAGA TTTGAGAGAGATAGTA  
AAGCAGAGAAA GCTGCAGAGGAGCTCCGGCAATCGCTGT TTTCCCTTCTCG GAAAGCATGTAGTGAATGA  
TGAATAGAGGCG TAAAATATAACCGCTAG GAAAA TAAA GAAGAGAGC GAAATC CAAAAGCGAGAAA GAA  
GATAGCG TTTTCAGATAACCATATCTATGCATGCCCTTGAT TTTTCAGTGTATATTCTCCAA GAAAAAATA  
AGCCATGAGAGGAGCTGTG GAAAGAGAAA CAGCATTACAGCT GAAATTTGGATGGATAGTATTTTTCCTTA  
CGATAAG GAAAAATAAGATT CAGTATAGGGAATAAGGCA TAAAATTAGCACGGGCTTGCG GAAACGTGGCTT  
ATAAGTTCCTAGGGCTAATCCAGAGAAA GTCATAGTACTACATAATAGGCCGATAGCAATTCTACGGAGT  
A TTTTC TGC TAAATG CAAA CGAGCATCTTTGGATTAAGTGT TTTTC CAAGG CAAA TAGTCTGTACGAGT TTTTC A  
TATACGAT TTTCC CAGCGAATAGCGTGGCTGTAAT TTTTC GGAATAAGGAATTCATCCAGAGT TTTTC TAGATA  
GAACTCGTTGGGATTAGATGTGCGAGCCTCT GAAAAAGAGAGGGAT TTTTG GAAA TGACTAGGACATTTTTC  
GCCTGAACAGAATC TTTAATTCACATCAGGAATAATCGTCTCAAT GAAACCAATATTGGATATCTCTTGAT  
TGTGT TTTTAAAGCAATAATTACATTTGT CAAATTTA CT TTTTC CCACAGTGATCTATCGCAATGAATATGCG  
ATCGT TTTCTTT TTTTC TGCAAGG TTTG TAAACAAA AGTGCCGGGGATGTCATAGCGATA TTTGCGATTGCT  
TTCCCTGTTTGAAA GCGG CAAA TCGAAGCTAACTCGGAACATGTATA GAAATTTGAAGCAACATAATACTC  
CTGAAGCAAT CAAAACAGGGAAGATAATCATTCCCTTGAGAAGCTCCAGAAGCT TTTTAAA AAGGTAA TTTG  
GTTATTATCGGAGAG TTTAC GAAA TAAGG TAAAAGGCCGAGATAAAA GCAAGATGCTGGGAGTATAAAA GGGGA  
AGGAGATAGGGAA TTTGGTAGGCAGTGACTTTTAAA AACTGTGCGATAAGGAACATCTTTTAGCAATATAAC  
TGACAA TTTCTTTGCAGAGA ACTGATGATAGAAA TGCAGATTAGGCTAAGCGTACAGAAA ACTGTGGTTTTT  
TAAA TAACGGAAAATAAGAAC TTTTC CATAGAATAGGCATGATGATTCCGTAATA GAAAATCAGTTGAACG  
TTTTAGCTAACAAA ACTATGCGCATA GAAAAATTGTG TAAATCTGTGGATAGTTAAGAACGATGCTATGA  
TAACCCG TTTATTTGAGAATGATAAGCAATTAGAAGTTTTTT TTTCTTC TTTAGACAAGAAAAAAAATA  
CTTGCTAGCTCTGTCTGGAGGTAGCGATTC TTTG TT TTTTGATGTACTTTGCTTAAGTCTCGAGCCAT TTTTC  
TTTTACTGCTGTGCATGTTGATTATGGATGGCGAGAGACTTCTTATCAGGAAGCAAGTGATTTTAGCTGCTT  
TATGTGAACAAGAGCAGATCCCA TTTAT TTTAGATCGTCCGGAAGCTACAGATCCATGGATTCTCGTGA  
TATAGAGAATGCAGCGCAGCCTATCGTTATGAATTATTCTATCGGTTATG CAAAGAAAAGTGCT TTTTC A  
GGGGTCT TTTCTTTGGT CATCATGCGGATGACCAAGCA GAAACGATTC TAAAACGGGTATTTCGAAGGTGCC  
ATCTAGGGAATCT TAAA GGAATGTCTGCACAGGTGATGTACAGAGACGTTGCCTTATTGCGTCC TTTATT  
ACACATTCCTAAGCATAAGATTGTAGAAGCTCTTGATAGTACCAAGTTCAATATGTTCAAGATATCACA  
AATTGTAATGAGCGATT TTTGCGTGCACGAATGAGAGAGCGCTTA TTTTCCTTA TTTACAAGATGT TTTTCG  
GAAA AATATAAGGGACCC TTTGCT TTTTCATTAGCAGGAGATTCGCGGAGCTGAGAGAATA TTTG GATCA  
G CAAA CAGCTCCTTT TTTGTTACGAGTCTGTTGATAATGAGAGAGG GAAATTTGTTACCTATAGAGCAAG  
TTACTAAA AACACCGTT TTTAGCTAAA TGGGTATG CAAA CAGTT TTTTCCTGAACGAAGGACTAGTTGCTT  
CAAAAAGT TTTTACAAACGG TTTA TGATCATCTTATGACAGGCTCTACAGCAAGATTACGGCTTCGTAA  
TCGAACAGT TTTGG TAAAAGCTAGGGGAGTAATCATA GAAAGTATATATTGATAGTGTT TTTG GGGCTTC  
CCTAGTGGGTT CAGCAGATTGCT GAAAGAAA AACACTTCTTGT TTTATCTCTATAATTAGAGG TTTAT  
AAACAAAATAATAAAA ATAT TTTGATATATTGAATAATTATCTGCCTG TTTGATTAGCATTGTAGTGAGTT  
TTATGGCTAAA GATAAAA AAAA CAAA TCCAGAATC CAAAAAAGT TTTTCCTACTGCTTT TTTCTTTC TCTT  
GTTCCGAGTGATT TTTGGCGTAGTCACAGTT CAAA ACTT TTTCTCTGC TAAA AAGGCTTCGGTAGGCTTC  
AGTCATCAACTCGAACATCTTGTTAACCT GAAAT TACTCATTCCAGAAGAGAGTCGCAAGACTGCCTTGA  
ACGATAA TTTAGTGTCA TTTAGTGGTTCG TTTCCGCGAGGTGGTCCCTGCTGAAGGTCAGGTTCCGGTATCA  
ATATCTTGATCTTATTGAACGTAAGCATCAGATCGACT TTTGAGCTGGAAGAGGGCAGTAAGTC TTTAACG  
GT TTTAT CAAAAGAAGTGCGTAATGCGATCACTGGT TTTTCAGCTA TTTCTGGAATGCCTATCCCTGAAG  
CAGGCTATACTA TTTTCCTCGAACGGATGTTGGGCTCTCTGT TTTAGAACC TTTAGTGGTTTA CGGCCC  
TGTAGATGCT CAAA TTGTGAACCTTGCTGCGCTA GAAAATCGGGTGCCTCT TTTGCC TAAATCTACAGAA  
AGTCTTAGAGTT TTTGGTTCGGATCTCTATGCATTAATTGG GAAA TATCTTTTC TCCAGCTCTTGGTATCG  
GGTCTGAATCCT TAAA AAAA GAAAT CAAAGATTTG CATCAGCAAGTA GAAA ACTCCTTAACTCAGGTTAT  
AGAAGGGGATCAGGCTGTTGCT TTTGTATAAAA ACTGTGCTTGAGACGTTGCATAGAA TTTTCCTTAGCACTA  
G TTTTCCTCTGAAGAAGGGACTCG TTTTC CATCAATTACGCTCTGTACGTCTATATCGTGAAGA TTTTC AACC  
GATGTGT CAAAT TATTAAGGGAGAGTGATGAGACTCAGGTGCAGCTCGATAAGTTGAGAGGGCAATTAGT  
CCAAGCTGT TTTGGTA TTTCAATAACCAAGA ACTCTCTTCTCGAGC TTTGGAGAAA CAAGATCCTGAAGT

TTTAGTCGTTGGTTTGAAGGCGCTAAAACAGGAATGGGCAGCATTCTCTTCAAATAAAATCTTTATCATTTA  
GAGCTCCAGATCAACCGCGTAAATTAGTTTTAGAGAAGACTTTCAGAAGTGAAGAGCCAACGCCCTCATTA  
CTCTGGTTATTTATTCACTTTTATGCCAATTATTTTGGTTCTGCTGTTTATCTACTTTATCTTTTCCTCGT  
CAGGTCAAAGGGATGAACGGTTCTGCTATGTCGTTTCGAAAAATCTCTGCGCGCTTGTTAGCAAAGGAC  
AAAACAAAGTAACTTTTGCAGGATGTAGCAGGGATAGAGGAAGCAAAGAAGAACTCGTTGAGATCGTAGA  
TTTCTTGAAGAATCCTACTAAATTTACTAGTTTAGGAGGGCGTATCCCATAAAGGAATCTTCTCATAGGA  
GCTCCAGGGACAGGAAAAACATTGATAGCTAAGGCTGTCGCTGGTGAGGCTGATCGACTTTCCTCTCCA  
TAGCCGGTTCTGATTTTCGTTGAAATGTTTGTGGGGTTGGAGCAAGTAGAATCCGAGATATGTTTCGAGCA  
GGCGAAGCGTAATGTCCTTGCATTATCTTCATTGATGAAATCGACGCAGTTGGAAGACATCGTTGGTGCT  
GGTATTGGAGGTGGTCATGACGAGAGAGAGCAGACTCTAAACCAGCTGTTAGTAGAAATGGATGGTTTTC  
GTACTAACGAAGGAGTCATCCTTATGGCTGCTACCAACCGCCGGATGTTTTGACAAAGGCTTTGTTGCG  
TCCAGGACGTTTTCACCGTCTGTTGTTGTGAATCTTCTGATAATAAAGGTGCTTTTGAAATCTCTCGCT  
GTCCACGCCAAACGCATTAAGCTAGATCCTACTGTAGATCTTATGGCGGTTGCGCGTAGCACTCCAGGAG  
CTTCAGGAGCTGATTTTGGAAAATCTTCTTAACGAAGCAGCATTATTTGGCTGCTAGAAAAGATCGTACAGC  
GGTGACAGCAGTTGAAGTTGCAGAAGCTCGAGACAAGGTTCTGTATGGTAAAGAAGCTCGTAGTTTAGAG  
ATGGATGCTCAAGAAAAAACAACGGCATAACCAGAGTCAGGGCATGCTATTGTAGGGCTTTGTGTTG  
AGCATTCCGATCCTGTAGATAAGGTGACGATTATTTCCAAGAGGCTTATCTTTTAGGAGCCACGCAATTCCT  
TCCAAAAAATAAATTAAGCTACTGGAAGAAAGAGCTTTTAGATCAGTTAGCGGTTCTTATGGGAGGC  
CGTGCTGCTGAACAGATTTTCTCGGTGATGTTTCTAGTGGAGCGCAACAAGATATTGCTCAGGCAACAA  
AGATTGTACGGAGCATGATTTTGTGAATGGGGAATGAGCGATCATTTTAGGAACTGTAGCTTATGACGAGCA  
TTCCGAAGCGGCTCCTACAGGATACGGATCCTACCATGAAAAAATTAAGTCTGAAGAGACGGCAAAGTT  
ATTGATAATGAACTTAAACTCTATTGGATGCTGCATATCAAAGAGCTTTTGACATCATCAACAGTCATA  
AAGAAGAGTTAGAGCTTATGACACAGATGTTGATAGAATTCGAGACTTTTGATTCATAAGATGTTAAAGA  
AATCATGGACCATTCTTGGGATGCTGATAAGAAACGGGCTCGTATGAAGGAAGAAGGCATGCTGTATAAG  
AAGAATTCGAAAGATCTTCCACCGCCGCTCCTCAAAGAAATGTGCAAGATGGGACGAGTTTGAAGTTTA  
ATACTAGCACATAACTTCCCTTCTGGAGGTTTAGGAGAGAGCCCTTTTATTAGGGCTCTCTTTTTTTTGT  
GTGTGAGGAAAGCTAGCGTCTAACATAATGTCTCTAAGTAAGGATGTTTGTAGGGGAAATAGCGATTTTC  
AGTGTGAGAAGCTTAGTTACAAGACAAATAAAAAGGCTAAGAAAACCCTTCTTAGCCTTGTTTTCAA  
CGAATCGCCTATAGAAGACTAATCTTCCAGCGTTGCCTTATGGCTCAGCTTCAACTGGCCTTTTTCGTTA  
ATGCTAAGGAGTTTAACAGCAAGCTTGTCTCCTTCTTTGACAAAATCAGAGATATTGTCTACTTTTGT  
TAGACAATTCAGAAAATAGACAGAGCCCTTCTTTTCTGGGAGGACTTCTACGAATACTCCAAATGTTGC  
GATAGATGTAACACGGCCATTATAAACCTTTTACCAGCTTCAACTTCTCCAGTTAATCCTTCGATAAGTTCT  
TTAGCTTTTGTAAATCGATTCTTGGGTGCTTGTCTGCTATGTTAATGACGCCGTCATCATTGATGTCACCT  
GCGCACCAGAACGCTCGATAAATTTGACGGATTTGTTTCTCCGGACCAATGACCGTTGCGATTTTGA  
GGTATTGATCTGCATAGTTTCAATGCGCGGAGCATATTTAGAAAAGCTTCCCTTAGGGGAGGCCAGAAT  
TGTGTCATAAGATTAAGGATATGACTACGCCCTGTTTAGCTTGGCTAGAGCTTGTCCATAATCTTAT  
GAGTGATTCCTCTATCTTGATATCCAATTTGGAAAAGCTGTAATACCCTTAGCTGTTCCGGCTACTTTAAA  
GTCCATATCTCCTAGATGATCTTCTATGCCGAAAATATCAGACAAGATGATGGCTTGATCTCGATCTAAG  
ATTAAGCCCATAGCAATACCTGCCACGGGAGCTTTGATAGGAACTCCTGCATCCATGAGTGCAAGACAGC  
CTCCACATACGGATGCCATGGAGGAAGATCCATTAGACTCAGTAATATTAGATTCTAGGCGAATGATATA  
AGGGAATCGTGATGTCCTCAGGAAGAACATGACTTAAAGCTTTCCTCAGCTAAATTCATGTCCAAATTTCA  
CGTCTTCTGGGGAACCAATTCTGCCAATCTCCTACGGAGAAAGGAGGAAAGAAACTGTAGATAGA  
AGCGAGCGGCTCCATCTCCATTCAGATCTTCAATCGCTGCGCCATATTTTCGCCCTCAAGCGTACATAC  
GGCCATGCTTTGCGTCTCTCCGCGAGTAAATAAGCAACTTCCGTGTGTTCTTGGAAAGCAAAGGAGTCTCT  
ATGGAAATGGGGCGAATCTCTGTGGTGGTTTCGTCATCTACACGAATACCAAGATCTTGGATAAGAGCTC  
GCATTTGATTAGATTTTGTCTGCTTAAATGCAGCCTTAACGTTCAAACAAGAAAATCACTGTTTCTTCT  
TTGAACCAAGTTAGCAATAACGGATTCCTCTAATTCCTTCGAGGCTTGGCTCTAGAGCTTCTTTATCTCTA  
AAAGACAATGCTTTTTCGAATTTTCTCTAAATAAATCTGAACTACATTTTGTACGTCTTCTGGCATAT  
CAAGAACGGCAGAGAAGTTCTTTTGTTCGCGATAGCTTTCCTGCCATGCTTCAATAGCATCGCATATTT  
AGCTATATAGGTTTCCCAAAGCAATAGCTTCTAGAACTTGCTCTTCTGTAAAAGTTCGCAATGTCCT  
TCAATCATTAAACTGCAGAAGCTGTTCTGCCATGACGAGATCCAGCTTGGAGGCACTTAACTCATCTC  
TGGTTGGGTTAATGACCACCTTCTCCGACGAGCCCAACGGTACACCCGCAATGATACAATTTTGAGG  
AACCTCTGAGATAGCTAAAGCGGCAGAAGCTCCCAAATAGCTAGAGGATCAGTAAAGTTTTTCCGTCG

TAAGAC CAAACGTAGGACAAGACTTGAATATCTTGCATGAGTCTATTAG GAAA CGACGGACG CAAA GAGC  
GATCTATTAGCCGA GAAACAAGAA TTTC TCTCTCGGAAGGCCGTCCTTCACGT TTTAGAAA TCCTCCAGA  
GGTCTTCCTGCGGAG GAAA ACTTCTCTTGATAGTCTACTCT GAAA GGCAGAAA ACCGACAGCCTCTGAC  
AAGGAGGCTGCACACGCTGAA GAAA AAACCCAAGTCTCGTTCAT TTTGACGAGAACAGCCCCACTGGCCT  
GGCGAGCTAT TTTC CCTGTCTC GAAA ATTAATGT TTTATCTTTG TCTAACGCAACA GAAAAAGTCT CAAA  
AGCCATGGAGTTGTCC TAAAAAC GAAA AGGGTACTAT TTTC TCAA TTGAGGGCAGCAAT TAAA TTTT  
ATATC TTTCAGTATCAGTAGAAT TTAAGTACTCTAGGAGCT TTTC TCTCTGCCCTACTAAT TTTAGCAA  
GCTAGACGAGAAT TTTGATCTTTA GGAGATCT TTTAAGGTGCTCCTTGAGTTCCGTTATGTGCTCAGTCA  
GAATAGCAATCTGCACATCTGCCGAACCTGTGTCTT TTTCATGAAGTT GAAA TTT TTTAGTAAT TTTC TTC  
TTTA GTGCCCTTATC CAAA GACATTCGATGTCTCCT TAAATA CAAA AAATGCCGTAATGACCAATTATAC  
CTAAGAGG TTTG TTAATGTACATCT TTTGCTAGAGTAAGAAGTTTTT TTTC TCTGTGCAGAGAAA TATAA  
GATGTCGATTAGGTAC TTTGTAGTATGTTATGAGGGGTT TTTGA TTTAGAAAAAAT CAAACTAATTCTTA  
ATGCAA GAAAACCTTT TTTATCGGGTTATAGCTAAT TTTATGTGTATA GAAAAAGA TTTATTTTTC ATGA  
AGAAGGCTCTAGATGAGGCTAGGAAGGCATATGAACAAGATGAAGTCCCTGTTGGTTGTATCATCGTTCA  
TGGAGATAAGATCATCGCTAGAGGACATAATAGTGTGAGCAAT TAAAAGATCCGACAGCACATGCT GAA  
ATGA TTTG TATTAGTGCAGCAGCAGAATATCTAGAGAATTGGAGATT GAAA GACACGATCCTCTACTGTA  
C TTTAGAGCCCTGTCTCATGTGTGCTGGAGCGATT CAGTTAGCACGTATT CCTAGAATTGTTTGGGGGC  
CCCTGA TTTGCG TTTAGGAGCTGGAGGGAGTTGGT TAAATGTTTT TTTAGAAAAACATCCTTTCCATCAA  
GTAGAGTGTGTTCTGGTG TTTG TTACCAAGAGTCTGAGCAGTTAAT GAAAAACTTTTT TTTAGAGAAGA  
GAAA GGCTAAGGATGAAGGAAGAAA TTCTCGCGCTACTTTGATCA TTTATATACGGAGCAG GAAA GACGAT  
TAATGTCGCTAGGGACGACGATTGTTCCCTGGATTGAC GAAA GAGGATCT TTTA CAGCCTATGGATTATGA  
TGA ACTTGAGGAGAACCCTTCT TTTAGAT TTTGAAGAAGGAGT TTTGAATGGAATAGGAGAGACTCGAGCC  
GCATTATATTCTTTTT TTTC TGATCTAGAAGACTCCT TTTG CGTGGAGTCTTCTAGCGATACGAGCCTCT  
GTAAGGATTAGGAATAT TTTCTTTATAG CAAA AACATATTGC CAAA GCCATAGACAGTACCGAACCAAGT  
AGGATTGCATAGGCGCCGGACAGAATCAGAATTAGGAAGTAGAAA TGGAGGAGTAGAA CAAA GCTCCAT T  
TTC TAGA TAAA GAGATAGGGAAA AGAGGGAGTGT CAGTCTTTT TTTCTGGATCTAG GAAAACGCGGACAAT  
CAAAAGAGCGCAGAT TAAACTTTTC TGGTCCGAAGAAA GCTTGGGTGCTTCCAATTAACCATAGAAA GGCC  
CAAA TGCTGATACCTGCAATACTGACTTGGGTAGTGAG TAAAAACA CAAAGCTACCTGTTCCGAG TTTC  
GAATAATTACATCTGTTGC TTTATAAAAAGAGGAT GAAATC CAAAACATTC CGCATGAGTAGGCGTTGCGT  
GATCTCAAGGCTGCGAAGATCCCCCAGC TTTAAGGTATCTGTGTTACGAGAGGATAGGTGAGCCATTGC  
CAAA AATAATGTTGATGAATTCCT TTTACAGAGAGAGCGAGCCATTCTATAGGCCACGCACTT GAAAAA  
AATACTGTAAGAAA AATGCGAT GAAA GGAGCGGAGCAAGAAGTTACTAGTACTAGAAGGGGAAGCTGTTT  
TAGGGCTTTCC CAAA AAGGGAG TTTGTTTG TACTTATCGGGGAAGATAACTCTCATGAAGGAGAGGCCCT  
TTTTACAAAAGTGTGATGATTGGCTCTATTATCTAGGCTCTGTT TTTGGCTGTCAACCTTCTTTTGTC  
TCGCAAGG TTTG TTA TTTGGGTGCATAG GAAAACCTGTGCACCCCAAGATATTAGTCCGAAGGAGACGTT  
GTAAGG TTTGCT TTTAATCGTTAGATCGATGAGAGAGGTAAGGAGCGCG GAAA CTGCTTGAAGAAT TTTCA  
TAGATTCTGTGGATGTGGCGTTCACCGATT TTTG GTTAGCTTGAGCACGTTGTTGAGCTGCGGACAGTTC  
CTGTTGGATGAGTTCTCTA TTTGCTGTAATCTGTTGGTTCGATG TTTGAAAAGCCTGAATAGTGTGTGA  
TTCGTGTAATTCGTCGTCAGAGCCATTTTT TTTGATTAGGTCAGGAACATATAACAAGGGGATGTTGATTA  
GTTCTTTG GTT TTTCTTTG TTGTTCCAGCGTAT TTTC TTGTAAGACAGCCATAATAGCATGGCTGTAATC  
TGTCGTTGCGACGGAGAG TTTACGATGACTGCAATGCAGAAA TACATAGCAGACTT TTTG TTAATCTCT  
ATGGATGTAGGCTCTATTAGAGTAGAGTCTGGTATGACAGTATTTTT TTTCAGGAAGAGTGGGGATGATTG  
CACTACTCATTGGATAACCCTC TTTA GATATTCGCGATCAAGCTAACGA TTTGTGAGAACGTTTG AATGAG  
CGCTGACCGACTTGTAGGGACTGTTGAATAATATATTATTCTGTTCAAGTTACTG GAAA TCACTTGA  
GAAGCA TTTCCAAGACCAGATA TTTG GT TTTGAATCGCTTGTCTAGATGCTCCGACTGCTTGGTTAACCG  
ATTGTACGT TTTGTAAA TAAGAGGAGT TTTGAGAG TTTACTTGGTTT TTTGGAATGGTAGTGTATTGGTA  
TAGCGCTTCTTCATGTTTCAGGAATG TTTGCGCGGCAGCATTAGCTTGCAATTGCTCTGCAACTAGAGAC  
AAGTTAT TTTGCGGACGAGAACAGACTGG TAAA TG TAG TAAA CAGTAACGATGAGAGGGTTAGAATCCT  
TAG CAAA TCGTGTTATAATCTCATCAGCCGTTGCAGAGTTCGTTGTTCCCTGTAACCGGAGGTG TTTCAGC  
TAGCTGTAATACAGCATAACATTGGTTC TTTATGCCACATACTTCTGCCTCGAATTAG TTTC TTGGGTTAA  
GACAGGGG TTTATTTAATTGGTTAACTGTGCTTCCCACGGAGTTCAATGTTTGTGATGAAGGAGGAGTTCT  
GTTGAGCGA TTTGCTGCATAATGTTGATG TTTG TAGATGCGTGAGAGAGGATAATCTGTCCAT TTTGTCG  
GGCAGTTACTAATTGGTCTTGATA TTTGAGCGTTGTGCAGAATAGT TTTGGTTCTGGT TTTGTACTCGT

GTGA T T T C G T C T T C T T T A G C T C C A G A G C C A A C G A C A G C G T A T T T G A T T T G A T T C G T T T C T T G G T T T A A T T  
G C T G T T G G A T A T T A G T A T T G T C G T T T A G C T G C T T A G A T T G C G T G A G A A T C G T C T C T T G A C G T A T T T C T A C  
A G C T T C T A A A A G A A G A G A G T A A A T G C T G A A C A A G A G T T C T G C T A T T G G A G G C G T T C C A A A G G C T C T A A A  
G G A G G T A G C G A G G A G A C G T A T T G T G T G T C T C T A C C T G T G A G G T T G G T G C T G A C A T A T T C T A A A A A T T T  
T T T T G G T T T T A T T T T T A T T T T A C C A G C A A T T T C T C T T T T A A T A A A A A T A A T A T T T G T T T T A A A A A T  
A A G C C G C T T A T T T A A G C C T C T T T C T T T T A A G T G C T A A C A G C C T T G A G A G A G G G G T A T A G G C T T T T C T T C T  
G T T C A A A T C G G A T A T T T G G A C A G C C C G C G A T T C T T C C C T A A A A A G G A T T T T G G A A G G A A T T A G C G G A G G A  
A G G T T A C A T A T T A T T A T C A A G T G T T T A A G G T T T T C G C A G A A G G C T G C G A G A A A T G T T T A A A T G A A A C C  
T G T T T T C C A A T G A G G G G G C T G T G T G G C A G A A A C T C A A G A C T G C G A G C G A T T G G A T T T T T A A A T G G T G A T  
G A T A T T A G T G C T T A T G T A G T G C T A A C T T G T G G G C A A C C C T C G G C T G A A G G A A A T G A A T G T C G A G A T G G  
T G T A T G A A G G G G A T C G A G A A T T G G T T A G C T T T T T G T T A A C C A A A G C G T T A G C T T C T T T T G A G C A G C C C T A  
A A C A A A A A A G A G G G T T C T A A T G G G A T T C G G A A C T G T G A G A G G A A A G A A A G C T G T G A A G T C C T T C T T C  
C T A A G G C C T C T A C A G A A T C T T G A A G T A G G G C T C T T T T C A T T A C C T A T A G T G T T A T T G T T G G G G G A G A T T G  
G G T G T G A T C T T C A A T C T C T T C C G T T T C T T T A G T A G C T G T T T T A A G T A T T G T A G G C G T T T T C G T T G C T C T  
A G T T T C C T T C T T C C G T A G T T G G G G C T A T G G G C T C T C T G T T G T A G G G G C T A T A T T T T T C G G G C T G G C T C T T  
T G T A A C A A T T T C C C T G T G T C T G T T T T T T G G G G A G G A T T G T T A A C T G T C T C T T T T A T T A T T T C T T A T G G G A  
T T C T T C T G C T G A G T G T G T C T T T T G G T T G A A G G A C A T A T T A A G G A G A A G G C T G T A T C T T T A T C A G A G C T G A C  
G G C A T C G C A C A A T T C C C T T C A A G A C T C C T A T A A C C G C G A A G T G C A A G A A C G A A A A G A A A G G A G C T T C T T  
G C C C A G A G T A A G A T A A C T G C T T T A G A A C A A G A G C T T T C T G T T T C G C A T G A G C A A C T C C A A G A G G T T T C C A  
G G A A A T A T A C G C A T A C A A G T G A A G A T T T A C A G A T T C T T A T T G A T C A G A G G G A T A G C T G G T T A A A A G A T T A  
C A T G A C T C T C C A T C A A G A G T A T G T G C G T G T A G T T G C T G G A G A T G A A G A G A A T G T C A T T T T C C C T T G A A A  
G T C T T T C A G G G T A A T T C T G A A A A G G A T T C T G G T T A T C A G C A G C G G G T T C A G G A T G C T G A A C A T A A G A T C G  
C T C A T T T A G A G A A G C T C T G T G A A G A G A A A A T A G C G G A A G C G C T A T G C T G A G G A G T G C T T G G A T A A G G C  
C T T A G C A G A T T T A T T A G A G T C T A C T C G G C T T A G G G A A A T T C T A G A G A A G A G A T C T T C A A A A G G A T G A G  
G A G A T C G C A T C T T T G A A A C A A G A G A T T G C A G C G G A A A G C T T T T G A G T T C T T C G T C A G T G A T G A C A G A G  
C G G C T T A T A A G G G T A A G T A C C T G C A A T T A A G G G A G C A G T T T A C G G T T A A G G A T T C C T T T C T G A A A A A G C  
T A G A C G C A A C G C T T C T T A G C T C A A G A G C A A C T T T T A G T T T T G A A G C G A G C T A A A G A A G A A G C C T T G  
A A T T T G C T C T A C A A C G G A T A G T T T T T C T A T T A T T C A A A A T C T T T T G C T A C A A A T T G A G G C A C T A G A A G A A G  
A A G T T A C T T A T C T A G A A G A G T T A G T A C T T C A C A A C C A G A A T C G G T A A T C A G A A T A G C A T G T T C C A T T G T  
G C A C T A G G C T G G T G G T C A C A T G T T C G T G C C T C C C A A T G G T T T A T T G G G T C A A T A A A C C C T T C T T T C T T T C  
C G A C A T T G A T C A T A G G C T C G A T A G T G A A G A T C A T T C C A G G T G C T A G A G G G A T T T T A C A A G A G T T T C T A T G  
G T G T G C C A C A A A A G G A T T T T C A T G A A A C T T G A C T C C C A C T C C G T G T C C A A C A A A C T G G T C A A C A C A G A G  
A A G C C A T A T T T A G C T G C A C A A T T T T C A A T C A C T T C G C C A A T T T C A T A C A G A G G A A G G T T A G G T T C G A G A A  
T A G A G A T A G C A G C A T T A A G A G C T T C T A G A G A A G C T T C A C A G A C T T T T C T T T T G A T C T C A G A G A C T T C T C C  
A A T C A T C A C C A T T C G G C T G C A A T C T C C A T A G A A T C C A T C G A C A A T G C A G G A A A C A T C A A T G T T C A T A A T G  
T C C C C A T T T T G T A A C G G G A T A T C A T T G G G G A T T C C G T G G C A A A T G A C T T C A T T T A G T G A T G T A C A G A T T G  
T T T T T G G A A A A G G C G G A T G G C C A T A A T T A A G A G G A G C T G G A A T G G C A T T A T G G C G T T T A T G T A A C T C T C G  
A G A G A G A A G A T C T A G T T C G T T T G T A G T T A C C C C T T C C T T A G C A G C T T C G C A T A A A G C A T C G A G A A T A T G A  
G C T G T A A C T T G G C A A G C T T T A C G A A T C T T T T C T A T C T G T T C T G G C G T T T T G A T A A T G A T A T C A T A A C G A G  
A G G C G T A A A G T T G T C G T A A A T T A T C A A G G G G A C G T T C T G G T T T A G T T G G G T A A T G G C A G T G T T T C C A T T T  
T T T G T T A C T G C C G C A C C A G C A A G G A T C G T T T C T T T T C A T A A A A G G A A C C A A A G A G T G A T T T T C T G A T T T C  
C C T A T C T C T T G A C A T A G A G A A G A G C T T T A A G G T G T A A C A T A T A A T A C C C T A T A T T G A A A G C C G T A G A A A G  
A G C T T T T A A C A T A A G A T T G C C C G C C A T C A A A G C C A A A C T A A T A C C A A T A A T C G T T C C A A A G C T A A C A G T  
C C C A T T T G G C C A A A T A A G C G A T T G A T A G A G C T A G A A A G A G A A G C G T G A T C A G A G A G A A T A G C C A A G C A A  
G C A C A A T A G C T C C C A G A A C G A T T T C T T T T G G G A A A A T A C C T T C C T C C A T A T G G C C T A A A G T C G A T G T A A T  
C A T T G C T G G G C C T G T G A T A A C A G G G A A G C C A G A G G G A A G A A A C G G G T T C G T C T T T A T C T T T C T C T A A A  
G T T T C T G A T T G A G A A G G A A G T G C C T T C A T C A T A T C A A T G G C T A T G G A G C C A A G C A G T A G G C C T C C T G T A A  
A T T G A A A A G C A G G T A A A G T G A T C C C T A G T A A G C G G A A A A A G C C T C G A C C A A A A G T A A C G A A T A G T A G C A G  
C A A G A G C A G T G C G A A A A T A G A T T C T C G T A A A A T G A T G C G T T G C T G T T T T T G A A A G A A A A T T T T T T A A T  
A A T G C A A T A A A A A C G G G A A G A G A G C C C A A A G C A T T A A A A A G A G C A T A A A A A A G T A A A G T A A G A C G A A A T A  
G T G A A T G T A G C A T A A A T A C A C G T G C T T T T C T T A T A G G A A G T T T G T T G T A G G C C A G A T A C C A G A A G T T G A G  
C G C C T A C A A T C A C G A C A G C T A G G C C T A G G A T G G T T T G T G T T G C G A T G A T C G T T T G C G A G C C G G C C T T A T T  
C G C T G T T T G A A G A A C A A T T G T G G T T A T T G T C A T C A T T A G C C A G G A T A G A C A C A G C A G C G C A C A A A C A A T G

GAAA AAGGAAGTTGCTGCATAGCTAAGGGGGCGCAAGCACATAGCCATGAAGGCCCGATCATGAGAGGAA  
GGGCTATGGGAGCTAC TTTAGGTGACTGGGATAACGAAGGAAT TTTACTC CAAA GGGATGCTTGAGTATT  
CCGAAGAATAGCCCGCATTCCCTGTGAACATAACCCACACCCTCCGACAACAGTAGCTGCGCATGCTGGT  
G TTTGCAAAGAG TAAA GGAGCCCTGATAATAGAGGA TAAAGAA CAAA AGACCCGAGAAGAG CAAA AAGAC  
TTTC CCTCAAGAGAAGCAGCGC TTTG CTTCT TTTA GATAAA TTACCTAGGATTGTATTAAGAACC TCAC  
ATTAGTCGTAGAGTCTGCTGC TAAAAA TAAA ATACAGC TTTGAGACAA CAAAAA AATGACCAGTCCATG  
AGACG TTTGTAAA GAGGTTGGTGGTTATATATT GAAA GAAGGGATC TTT CAGTCC TTTGTA ACTGAGGGA  
TCCCC GAAATCGTCACACAGAAGTGTAGTT CAAA TTGAGATTTA GT GAAACCTAATAATCAACGA GAAAG  
AGCAACATT TTTG TTGACTAACGAACTCGTAGTGT GAAACAAA GAGGTTGAGTTAGGAAGAAGCTATTG  
TCTCAGATGCATCACTAATCAAGG TTTCAATA GAAA AAGTATCGATGGAAGCTTGCAGATCAGGGCAAGT  
TG TAGACAATGTTACGAGTAGAGATTCTAGCAATTCCTGTA TAAA GGTTCCCTGAGT TTTG GCCAA CAAA  
GGAAGGTA ACTTCCATTGAGCCTGCTCATCGGATAACAC TTTAGGAGAGTC TTTA GTCGCTTCTACGT  
AGATAGC GAAAGCCTCTTGGGGATATTCACGACA GAAATC CAAA CTGCGAGA TAAAGCTTTTTG CAAGCT  
TTG GAGTGT TTTGAGGTGT CATCGCTGGAGACCCTTT TTTCCCG CAAA TAAGGAGCTGCGGGCCTGTAGGG  
GATCCATAAGTGTCA GAAAGAAA ACAACCGGTAGGGGTTCCCT TTTAAGGCGATAGTGACGCCCTCAACAT  
TG TAAA AACCTCCATACA GAAATCAA TTTGATAAGTGAGCATAGGA GAAA TCATATCTGCGCTGACGTT  
TTTGAT TTTCTGAAGGAACCACATGATGCTTGGC TAAA GCCTCTAGCAGATTAGGCAGGTTCTTGGAGTCA  
TTGAGG CAAAAGCCTAGTACGCGTCCGTTAAGATCTTCAAGTT TTTCAACGCCCTTCA TTTTTTTT TATAGA  
TCAGACCTTGCAAGGAGCTGTGCGATAAGTCTGCCTGCTACTTTGAACAGGAGCTCCTCGA ACTGCAGT TTT  
CAATACCCCTAAGCTGTGG TAAA GCGTGTAACTCTAC TTTCTCAAGAAGCAGATGAGGAATAGAAGAACAA  
GTATCCGTATTTT TTTGTAAGGTTAAG GAAA TCCCTTCATCTA CAAAAAATCCTT TTTCTACACCTACAT  
AGAGGGGAATGTGATTAGGATTCGGAGTCCAATCCAAGAGTAGAG TAAAGGAT TTTA GTAGGGACGGGAGC  
GGCTAAT TTTG GATCGTCT TTTAAGTA GAAAAGACAGGGCAATACAGTAATTGGAATTAGAG CAAA GACC  
CATTT TTTCC CAAAAGATCTTTTG GAAGTTTT TTTTCATTCTAAAGAAAAAAGTGTGCGCTCAAGAA  
G TAAAACGCTATAAAAACAGACTTAGAGTCAGCACGGTTAGGACAAAATAAACCCGCTAGAGCCATTGCCAT  
GTCATAG TTTCTGCGGC TTTCCAGAATAAGAATACCTAGACCAGATTGTGTTGCAACCCATTCTCCAGCA  
ATGGTCG CAAA TCCCTGCGGCACTCATAGCAAT TTTAAGCCAGAGAAAATATGTGGCAGACCCGTTAGGAA  
TTCTTAAT TTTAAA GAG TTTCTGCCAAGTAGTTGCTTGG TAAAGAG TAAATTGTTCTAAGAGTTCTCAGG  
AGAATT TTTAATTCCCTGATGAATGGTCAGAGC TAAAGGGAAA AAGATGCTAAGAGCTGTTGGGATGATT  
ACTGCTCTTGTCCCCAAC CAAAC CAAA GAACGAT TAAAGGGCTAGAGTGAACATAGGAAGGCATTGCA  
CCAGAACACACAAGGGGTGCAACAAGCCTT GAGTAGAAG GAAA TAGAAGCATGGTAGCA GAAAAGAGGAT  
AGCAAGTAGTAATGC TAAA AAGAATCCTCC TAAA ATGCCTTGGGCTGTATAGCAAGAATGCTGGAATAGT  
ACCGG GAAA GAATGGATCCCTGTGCTAAGTACCTTCGATGGAGGAGGCATA TAAAGC CAAA ACTCGGAT  
AGT TTTGAGCA CAAA ACTCCAGAGTCCAATCAAGGGAAGGATGATGAG TAAA TAGCTAATAAA TTT TTT  
CATAAA AATAGAAA AAACGACTTCATGAAGGAAGAATCATAGGGGAAGAGAGCATATGCGGCAAGAGAAT  
GATAGCTTAGGAATTGTGTTGGTTCCGAAGA CAAA CTA TTTG GAGCTCAGACGGGACGTTCCGAAGAGT  
T TTTCTCTTATGG TAAA GAATCTATGCCTCTT GAGATTATCCATGCATTAG TAAA AAT TAAAAAATGTGC  
TGCTAAGGCGAACGGAGACTTGGGGTGCCTTAGATGC TAAACGCAGGGATATGATTGTTGCTGCTACAGAT  
GAAA TTCTCTCCGGAGAA TTTGATGAACACTTCCCT TTTAAAGG TTTG GCAGACAGGAAGCGGCACT CAAA  
GCAATATGAATGTCAATGAGGTGATTGCTAA TTTA GCAATTCAGCGTCATGGGGGAGAGCTTGGAAGTAA  
ACATCCCGTGCATCCAATGATCACGTGAATAAA CCCAGTCCT CAAA TGATGT TTTCCCAACGGCAATGC  
ATATAGCTGCGGTA CAAAGTATAAA AGGATCTTTA ATTCCGGTATTGGAACATTTAAAAAAGTTGTTGA  
TGC TAAAGC TTTA GAG TTTGCTCGAGATA TAAA AATTGGAAGAACGCA TTTGATGGATGTAGTTCCAATG  
ACTCTTGGG CAAA AGAGT TTTCTGGGTATAGTTGT CAGTTGCATAATTG TTTA GAGCGGATAGGAT TTTCT  
TTTA ACTCACCTCTATGAGTTGGCTATTGGAGGGACTGCTATTGGAACAGGGT TAAA GTTCCCTGAAGGA  
TTTG TAGAGAAGGTGATT CAGTA TTTGAGGAGGGAGACAGGAGAGCCC TTTGTTCAGCTTCGAAC TACT  
TTGCTGCGTTATCGAATCATGATGC TTTGGTGCAAGCTCACGGATCATTGACTGTGTTAGCTTGTGC TTT  
GGT TAAA ATTGCTACAGATCTAAGTTT TTTGGGGTCAGGACCTCGTTGTGGATTAGGG GAAA TTTCTTT  
CCGGAGAACGAGCCAGGATCTTCGATCATGCCTGG GAAA ATTAACCCGACG CAAA GCGAAGCT TTTA CAGA  
TGG TTTG TTCTCAAGTAATCGGGAACAACCAGTCCATTATTT TTTCTGGA CAAA AGGGA ACTTCGA ACT  
GAATGTCAT GAAA CCGTCAATTATCTATGAT TTTCTACAGTCAGTGA ACTTATTAGCTGGTGTATGAGA  
TCG TTTG CAGATTGT TTTGTTTG CCGACTCAAGG TAAA TAAGGGGCAACTACAG CAAA ATGTA GAAA GAT  
CTTTGATGTTGGTAACGGCGTTAGCTCCCAT TTTGGGTACGATAAA TGTT CAAA GATTGC TTTGAAAGC

TTTTCATGAAAATTTGAGTCTTAAA GAAGCGTGTGTCTCTTTTAGGCTTTTGTCTGAAAAGAGTTTGAT  
GAGCATGTAATTCAGGATTGATGGTAGGGAACAGAGGACACGAATAGATACGAGAACAAGTATGTCGCC  
CGCCCCAAGTAATCAACACGGGGCGGAGAAGATCAGAGACTTGTTTATACAAGACATCTATTGAGAAG  
ACTTACTCTCTAACTTAATAAGGGCTTTTGCAAA CAATAACGCACC TTTAATGTTTGAGAAGATATGGTC  
TACTCCGATCAATTCATCTACATGGTACCTTCTCAAATCACTGAGAGGAGTTTTTTTTCACGCCAGCTAAG  
AGAAGCAATGTTCTTGTCTGGTTCGCATTCCAAGAAGAACTCTTCTAGAGCGTGCATGGCAGATGCATCTA  
TTGTAGGCACTCGAGTCATGCAAAAGGATAAATATTTTAGGCGGCTTTTCTATTTTCATTTAATAAGTTTT  
CAAA CGATCTGCGATGC CAAAGAAA AACGGTCCGTTGATTTTCATAAATTTTCGTAAAAGGTGGTACTTCA  
TTTTTGCTAAATAGCAAGTCATTTTGAGGTTGTTCCGATTTCATCAAATATTTTGCTGTGGAGATAACAT  
CAGATAGATCGCTCA TTTGTTTTCATGAATAGAAA GGCTGCAAGCATCATGCCTACTTGTACTGCAGAAGT  
AATCGTAGTCATTACTGTAAGAATGAACACGGTTAGCAGGACAAGAACGTCTTTTTTAGGAGCTGTGAAT  
AGATGAATGAAATGGTGAATTTTCACTCATATTCCAAGCAATTAATAATTAACAGCTGCTAGACATGTTA  
GAGGGATTTTAATAGTTAAGGGAGCTAGGAGTAGTAGGATAAAGGAAAGACAGATGGCATGGATTATTCC  
TGCTATAGGAGTACTAGCGCCGCACTTGATGCTAGCCGTTGTTCTTGAAAGCGAGCCTGTAACAGGCATG  
CCAGCAAATAAAGAGGTTCCAATGTTAGCAATTCCTTGCCCAATTAATTGGCAGTTTGATTGATGTCTCC  
ACCCAGTCATTCCATCTGCAACGCAGCTGCTAATAAGTTTCTATTCCAGAAA GAACGGAAATAGTTAA  
AGCATCTGGCATAAGTTGAAGCATTTTAGTAATGCTTATGTGTGGGAAAAGTGGACCAGGTAAAAGAGCTT  
GGTAAGGTACCATAACGGCTACCGATGGTAGGGATGTCTATTTTAAGAATCCATACTAGAGTCGATGCAA  
TGATAATAGAAATCATTACGCCGGGATAACGAGGTTTGTAATTGC GAAAGTAGATCATTAGAAGCAGGGT  
AAATAAACCACAGCAAAGGTCTTGTATCCAGGTCCATAGGTAATCCAATAGGCTGCCCATTTGCCG  
ATGAAATC TAAAGGAACCTCATCTCCCA TTTG AAGCCCAAGAAAATCTCGGATTTGGGAAGAAAAAATGA  
TGACCGCAATTCCTAGTTAGTCCGGTCAACACAGGATACGGCATATA TTTAATAAAGTGCCTAGTCC  
GGCAAGAC CAAAGATAACGAGGAAGATCCAGCCATCAATGTGATAG TAAACAGTCCGTCTTCGCCATAT  
TTGACACCGATACAG TAAAGGATGGAGA TAAAGGAACCTGGTAGGGCCAGAGATTAATACACGACTGCCTC  
CTAAGGCAGAGGC TAAAAGCCTCCAATAATTGAGGCCAATAGTCTTGTAAAAGGAGACACTCCAATCCC  
GATCGCAATAGCAATAGC TAAAGGGAAGGCTAGAATCCCTGCAGTGATCCCTGCGGTAAAGTCTTTTTTG  
AGCGTAT TAAAAGAATACCCTTCT TTTAAGCAGGTAAC TAATTTAGGGATAAGATGTTTGAAGGATAGGG  
AAACTTTTACC CAAAGCCTCTGCTGGTTC GAAAAGATGGTTTTCTTTTATAATA GAAAGGAATTTATCC  
AACGAGAAGAGAGGTGAGAACTCTCTTGGTAGGACAGCCCTTCTATT TTTATCGCGAATAGAAA CGCAA  
GCTTAGTCTATTTGTAAAGTGGTGTAGCGTT TTTTCATCACC AATTCGCGATCGGTTTGTCTAGTCAGCG  
AGTGGGATGACT TAAACACAGGCTATTGTTATCCTTAAGAGGAGGAGGGTGATATAATTGCACTCCCGAG  
TCTCTTGGTACCAA CAAAGTGAGAACAC TTTTCGATGAAAAAGAGTTTCTATGCAACAGTTTTGCGGACG  
AGTTGAACGGATAAGATAGAGCTATTACAGAGAGATTTTAGATAAGAAAAACATTTTTAAGAAGGTTT  
TTATCACTATTTTATTTGAATCTGTTAATC CAAAGTGGTGGAGGATAGTTTCTTTTTATTAAGGATCGG  
AGGGTTTTCACTGTAGAGTTGAAAAGTGT TTTGTGTAAGATGATCTAGGTCTTTGTAAGCTTGTCTTT  
GGATAGCGCCTTCT TTTGAAGGGTTTCTATACTAAGAACTCGGAGATGAGTCCAGGATCTGTGTATAAG  
GTTGGATTCTAACTGTCTGTACATCAGCGTATATACG CAAAGTCTGTGT TTTCTCGTAATTATTTTGC  
CTAAGCTTCTGCGGGCTCTTGGTGTCTGAATAAA GTCCCTCAGAGTAAGGTGCTTGTGCGAGGTCTTTATG  
TTAAA GTTCCAGTTATGTTTGT TTTCTGTTCCGATATCTCGCGATCGTTTTTGAACATATTGTTCCGAG  
TAAACAAGTCTGCCGTATCTCTTGCTATGGGAGGCTTGATGTGGTTAGTTTGT TTTCCCATATACCGCA  
CATTGATCACGTATGATGGTCGAA GAAATTGCAGACATGGCACAAGTCATTTTCTTCTTATTTGCTGCG  
ATGGCAATTGTGGAACATCGATGCTCATAGAGGATTTTCTATTGTAGTGCCTTGTGTAATGTTGAAT  
CCAGAAGCGTGCTGC TTTGGGTATTACTTATCC TTTCTTTTTTCTTTCCGCAGCCTTAGATAACCTGAC  
ATCCATTATTATTATTA TTTCTATTC TAAAGCGTCTGGT GAAAGCTCGAGAGGATCGGCTGCTACTAGGA  
GCTCTATGCGTGATGGAG TAAACGCAGGAGGAGCTTGACCCCTTTAGGGGATGTGACTACGACTATGC  
TTTG GATTAACGATAAGA TTTCTACGTCGGGTATTACTACGCTA TTTCTTCC TAGTGTGTCTGTGT  
AGTGATCGCAGGAATCTGTGGGCAATTATTAC TAAA AAAACGTCGTTGTTTTCAGGATTGTCAGAGGATTTG  
GATAGAGAACC GCGCTCCCTAAGAGTAACCTGATGCTGCTGTGTTGGC TTTGGTTC TTTGCTCATGGTTC  
CTATGTG GAAAGCTGTATTAGGAGTCTCCTCT TTTATGGGGGCTTTATTGGGGCTGGGTTTAGTTTG GTT  
GGTGAGTGATTGGATTCCTCTCATGGTGAGGGGCGTAATCA TTTGCGTATGCCGCATATTTTAACG  
CGTATCGATATTTCTTCTGTTACATTC TTTATAGGGATTCTGTTGGCTGTTAATGCGCTAACCTACTCTC  
ATGTATTACGGGATTTATCTGTGAGTATGGATGCGCTGT TTTCTCGTAACACGCTTGCTGTTCTTTTAGG  
TTTAGTCTCTAGCGTTTTAGATAATGTGCCATTAGTCGCTGCAACAATAGGTATGTATGACTTACCTATG

AACGATCCTCTTTGGAAACTCATTGCCTATACAGCAGGCACAGGGGAAGTATTCTCATCATTGGATCCG  
CTGCAGGTGTTGCCTACATGGGAATGGAAAAAGTGAGTTTCGGCTGGTATGTCAAAACACGCTTCTGGAT  
TGC TTAGCCAGTTATTTGGAGGCTAGCAGTCTATTTCTAATGGAAAATTGTGTGAATTTGTTTCGTT  
TGAGGTAGTCAGTATGGCAGAGTTTCTTTAAAAATTTCTTTAATAAAAAGGGTTCTCTGCCTATTCTAGGC  
CCCTTTTGAATGGAAAATGGGTTTTGGAGAACATCGATTATGAAAATGAATAGGATTTTGGCTATTAC  
TGCTTACCTTTCTTCTGCCATACATTCTCCTGTACGAGGAGAAAAGCTTGGTTTGCAGAATGCTCTTCA  
AGATTTGAGTTTTGTAGAGCATTTATTACAGGTAAAATATGCTCCAAAACATGGAAAAGCAATACTTA  
GGATGGGATCTTGTCAAAGCTCCGTTTCTGCACAGCAGAAGCTTCGTACACAAAAGAAAATCCATCAACAA  
GTTTTTGGCCAGCAGGTCCTTGTGATTTATCGGAGGATAAAATGACTTTTACGCTGGAGTAACTTTCTT  
TGCGATAAAAAGTGCTTACCTTCTTATACCGTAAAAGTAGTGACGGCCGTTTCTACTTTGTAGAT  
ATCATGACTTTTCTTCAGAGATCCGTGTTGGAGATGAGTTGCTAGAGGTGGATGGGGCGCTGTCCAAG  
ATGTGCTCGCTACTCTATATGGAAGCAATCAAAAAGGACTGCAGCTGAAGAGTCGGCTGCTTTAAGAAC  
ACTATTTTCTCGCATGGCCTCTTTAGGGCAGAAAATACCTTCTGGGCGCACTACTTTTAAAGATTCGTGCT  
CCTTTTGGTACTACGAGAGAAGTTCGTGTAAAATGGCGTTATGTTCTGAAGGTGATAGGAGATTTGGCTA  
CCATAGCTCCTTCTATCAGGGCTCCACAGTTACAAAATCGATGAGAAGCTTTTCCCTAAGAAAATGATGA  
TGCGTTTCTATCGGTCTAGTTCGCTATTCTACTCTCCAATGGTTCCGCATTTTGGGGCAGAGCTTCGCAAT  
CATTATGCAACGAGTGGTTTGAAGAGCGGGTACAATATTGGGAGTACCGATGGGTTTCTCCCTGTCATTG  
GGCTGTTATATGGGAGTCGGAGGGTCTTTTCCGCGCTTATAATTTCTTTCGGTGACTGATGGGGATGGTAA  
GAGCCAATAAGTAGGATTTTCTAAGAATTCTACATATAGTTGGCAGGACATGGAAGATTTTGTATCCTTCA  
GGACCGCTCCTTGGGAAGAAATTTGCTAAGATTATTCAAGTATTTCTTCTAATACAGAAGCTTTGATTA  
TCGACCAACGAACAACCCAGGTGGTAGTGTCTTTATCTTTATGCACTGCTTTTCCATGTTGACAGACCG  
TCCTTTAGAACTTCCAAAATAGAAATGATTCTGACTCAGGATGAAGTGGTTGATGCTTTTAGATTGGTTA  
ACCTGTTGGAAAACGTAGACACAAAAGTGGAGTCTCGCTTGTCTGGGAGACAACATGGAAGGATATA  
CTGTGGATCTACAGTTGCCGAGTATTTAAAAAGCTTTTGGACGTCAAGTATTGAATTTGTTGGAGTAAAGG  
GGATATCGAGTTATCAACACCTATTCTCTTTTGGTTTTGGAGAAGATTATCCACATCCTCGAGTTCAA  
TACTCTAAACCGATTTTGTGTTTGTATCAATGAGCAAGACTTTTCTTGTGCTGACTTCTTCCCTGTAGTTT  
TGAAAACAATGATCGAGCTCTTATTGTTGGTACTCGAACAGCTGGAGCTGGAGATTTTGTCTTTAATGT  
GCAGTTCCAAAATAGAAGTGAATAAAAACCTTGTCTTTTAACAGGATCATTAGCTGTTAGAGAGCATGGT  
GCCTTCATTGAGAACATCGGAGTCGAACCGCATATCGATCTGCCCTTTTACAGCGAATGATATTGCTATA  
AAGGCTATTCCGAGTATCTTGATAAGGTCAAAAAATGGTTTGTTCAGCTGATCAATAACGACGGTACCAT  
TATTCTTGGCGAAGATGGTAGTTTTTAAGTGGCGTTTTCGTTTCATAGTAAGAGGGGGCTTTTGGGATTTA  
TAGTCCCAAAGCCCTTGTGTGTTTAAAACATTAATAAATGGAAAAGTGTATGCATGCGTAAAATPATACTC  
TGTTCGCTAGAGGCTTCTGTGCGGAGTTATTCTGTGCGATACAGACGGTTGAAGTAGCCCTGGAGAAGT  
GGGGGAGACCTATTTATGTAAAAGCATGAGATTGTACATAATCGGCATGTCGTAGATAAAATTACGGGAGAA  
AGGGGCTATTTTATTTGAAGATTTGCAAGAAGTTCTCGTAATAGTCGAGTGATTTTTCGCGACACGGGA  
GTTCCCCCTTCTTAAAGAGAAGAAGCTACGGAAAAGGATTGATTGCTATTGATGCGACATGTGGACTGG  
TTACGAAAAGTGCATCTGCGAGTAAAATGTACGCTAAAAAAGGGTATCACATCATCCTTATAGGCAAAAG  
AAAAGCACGTTGAGATTATTGGGATACGCGGAGAAGCCCCCGATCAAAATCACTGTGGTAGAAAATATCGCT  
GAAGTTGAAGCGCTGCCCTTTAGTGTCAAGATCCTTTTGTTTATGTAACGAAAAGCAGATTGAGTATGG  
ATGATGCTGCTGATATTGTTGCGGCCTTTGAAGGCTCGTTATCCTCGAATCTTTACATTACCCAGTTCTTC  
TATCTGCTATGCTACACAGAACCGACAGGGAGCTTTTACGAAAATATCCTTCTCAGGTCGACTTTGTGTAT  
GTAATAGGGGACAGGCAAAGCTCCAATCAAAATCGTTTGGAGAGAAGTGGCAGAGAGACGAGGAGTTACTG  
CTAGACTTGTCAATCATCCTGATGAAGTCACAGAAGAAATTTTACAATATTGAGAAAATATCGGCATAAC  
CGCTGGGGCTTCTACTCCAGAAGATGTTGTGCAAGCTTGTTTAATGAAATTACAAGAGCTGATTCCTGAT  
TTGTTCTATAGAAAATGGATCTTTTGTAGAAGAAGATACAGTATTTTCAGTTGCCTAAGGAATTATAATTAG  
AGAAGTCAGATGAGTTTATCTCATCTGACGGAATTTTCTCACTTAGCTATTGGTAGAGGCTGCGGACTG  
CATCATGTTGCGTTTGTAAAGATCTGTAGCAAGAAGCTATCCATGTTTCGCCAATGATCTTTAAGCTCTTC  
TATCGATCGAAGCAATTTCTGTCGTGTTCTAAGCAAAAAGGTTCTTTATAACTCTCAGCGATTGTTCTGACT  
GCATTTGGCACGGAGATCATAGACTGTGGAGGAGACTTTTAGCTAGTTTCAGACAGAGAAGAACACACTTTCC  
CCATCCCCTCAAAAATGTTTTTGTATGAGGCTTGTGTTGCCAACCACCTGTTGCTTTTCAATGACATTGAG  
AAGTCTTCTCCACCTACTTCCCCAATGATAGGGGAGATACCTCCGAAAATACCCAGGGTAGCTGTAGCA  
ATGCCAAGCCATTTTGTAAATTCGAGCCTGTTTGTCAAAGGAGTCCGCGATTTTCTTCGCTTCTGTCATGA  
AGTGTGTTCCGGTAGATCGGCGTTCAAGAAGATCTGTTTACGGCTGTTGAGCATCAGTTTTCATGATTTTC

CGCGCAGATACGCAGAATATCTAGATGATTTCAGGCGTATGTGAAGCAATTGACTGAGCTGGGCTTCAGAG  
AGAGCAAACCTCACGAAATTTCTCTGGTAAATACTCAGGATCAAAAGTGGTGCTCGCGTCGTTTTTTACTAT  
GAGAAAGAAAGCTTGCAGAGATGGCAAGATCTTCTTTTCTTCTTGTGTTGATCCGATTGATGATGGTC  
ACGATCTCCTTCTTGGATAGGTCTTCTCGTTCTGTGTAAGAGTCTTCTCTCGCGAGAGTTTCTTTTGG  
GCTGTTGTTTCAAATAGAGCCATTGGGCTAAGAAGTGTGCACGAGGTGAAGAGAGATTCTTTGCAATG  
AGGAAGAATGGGAAGAAGATTGCTCTTGAAGCAGCGAATCTTCTTCGAGGAAGAAGAGCTTTCTTT  
GTTGAAGATAGTAACAGAGAGTGTAGGGCTACAAATTTGAGTTTTGAATAGGTTCCCGATCGGTAAGAGCC  
TGTTGCGTGTGGGTAACGAAATGATAACAGGTATACTTCGTAAAGGAGTGAATGTTGGGGAGATGTCT  
GTATGCGTCTTGTACGGAAGAATTTATGAGATATCGGGGTAGAAGGCTTATTATGTAGAGTCTGGGTCGG  
AGTCTTTTGGAGGTGTAGGGGTGGGTGTAAAGACTGCTGTTCTGCTGTGGCAGATTCTTGTGTTTCAGAA  
GAAGCAGAAGTTTGTGAGACAGATAATTTCAAAGGACAGCTTTCTCGAAAGGAAGAGAATGTTTCAAT  
GAGGAAGAGTTTCTGTCTGCTCAATAACAGATAAAAGAGATCGAAAGGCTCCGAAGGATTGCTGC  
TTGACCTGGTTCAAGCAGCTGTAATTTCAATGGAGAGGGCAGAGGCTTCTTCAACAAGAAGTCTCTGTCTGC  
TCTCCTGTTGCTATTGTTGTAATGAAGGTAGTGTCTTTCGGTACTGTTATCGTCATGGGAAGGATCG  
CTATCGTAAGGCGTCTGTAAACGTTTGTCAATTTCTCGTTGTAATGTAAGTTTCTGTGAGTTGTTCA  
AAAGAGGTTTGCATAGAGTCAAGGAGTTGTTACGACAGTAAATAATATTCATCCCCTTCCCAATTTATTA  
ATTCGATGCGTGCATCGAATTTGAGTACAGCGTGCACGAATTTTGGACTGCTTGAATGTAATAGAGGGC  
AACACCTTGTGTCAAGCCAAGCATTCCGGATAATGCTGGTGCAATAGATTTTACAACGCTTCCAACAGA  
GGACTCATTCCCAATTTAGCAACAATAAGGGCAAAAGGGATAGCAGACAGCTAAACAGTTAAGGCCA  
GTTTACATAAAGCTAGATAACGCATTTTTTTTCTTAGATCATTCCCAGGAAGATGTTTTCGAATAGCTCT  
CCAACCATCAAAAGCTTCTAAAGGGATATGACTATCATGATTAAGCTGCAGAAAGGGAACACCAGGAA  
AGGATGCCACCTCAAGCGCTATGATGGTTACAGCGACCCCATTTCTATCCAAGGATGATTGTAGCGA  
CGATGCTCGCTAGAGAATCCCAAAATCGCATGGTTTTAGACTTATCAACAATTTTCTGCACCTGTTTCGAT  
TCGTTCTTGGTGCAACATGGTTAATCTTGTGAGTCGTTCTAGATTGTCTTTGTAGGCAGAATAGGCA  
GAAATACTGCAAGGATACCTTGTTAGTGAAGGTAGCTTAAAGAGAAGATCCCTACAGTAGGTGGTG  
TGATGATAGGAACAACCTCTTTTGGCTCGTTCCTTCTTCTTTGTTATTTTGTGAGAAGGTTGCTGAGAATA  
AGGGTCTTCTTTCGAAGAGTGTCTCGACGAGTCTTGACTTTCTCCTGATGCTTTTGAAGGAGGGTGGAG  
GTTCTAAGTAGAGGATGTTTGTGTTCTTGTGCAACGGTTCTTCTTTTTTTTGTGTCACCTAACCTTTCTCT  
CTAGAGACTCAGTTTACGCGAGAAGCTATCTATTTCTTCCATGATAGGAGACAGATTGTCCTTTTGTAG  
AGAGCTAAATGACTCCTTGTGGTGTTCAGGAGTGTGAAGAAGGTTCTCTGAAGGTTTAAACAGGCTCCGAA  
GAAGAGGGTTTGTGCTGTCTCTAGCCTAAGCTCTGATGAAAGGTGCAGTTTCTTGATAGTTTACGCG  
TGGAGTTTCTGAGCCTGGCTGTTGAAAAGAGGTTCCAAGGAGAAGATGTTGTAGTGCCTACAGTAGAGGA  
GAGTTGAGAAGAGGGAGAGCTTCAAAGAATAAGATGCGCTCTTTAGGTTAGTGCCTGTAGTCTAGAG  
AAAGAAAGCGGGGCAGATTCTTTTGAAGAAGCAAGATGCGCAAAAGATCTTTCGGATGCAAGAAGGAGCGC  
TCTCCTTAGATATGGAGCAAGAATAAGGGAATTTTCTGTCTGGACGGCCAGAGAAGCATCTGGTAGATC  
GAGAGTTTGAAGAGAGAGCGACGCTGTCTGCTTGGCAAACCAGGATGACATAATAAAGAGTCTTTTGT  
GATCTATTTTAGGCGTACGATTTGATCGCTAAATTTCTTCTTTTAAAGAGCTATAGGCAGAGCTTGTTT  
TTACTTTTTCGAAGCAAGATCAAGAGCTTTTTCAGCTTCTCAGGATTATTGAGCAGGGTGTAGCAGAT  
GTAGGCATAGTAATGAGGATAAGGGTCTTTTCTCTTAGCAAAAGCAGCTACACCATAAGCATGAAGAGCT  
TGTTGATATTTTGGCGCATATGGAGCGAAGCTCCTAATGAAACCAAAATTTAGACAATAAGGGTTAA  
AGAAAATCAACCAGTAAAGCGGTAGAATTTCTCATAGTCTCCTTGTAATAGGCGTTGTATCCTTC  
CTTGTAGACTTGTCAAGATCTTCTGAGGACAGTTTGAATAATTTTGTAGAGGTGTCAGAGGGATATCT  
TTATTGGGGATATAATCTCAAAGTACGCTTCCATATTATCGGGAAGCGGACACATATGAGGGTAAGAGC  
GAGCAATTTTATCGAGTAGATAGGCATAATGACGCATTAGGGACGCATGTTGTAGATAAAGGTGTCATA  
AGTTCTTTCAAAGTTTCAAGACATTGGATCTTGTCTGGTGGCATGAGACACTTCTTGGAGATGGCGTT  
GCATATCAGTGCCTTCTAGCTGAGTGTATTTCTCCATATTTTCTTTCGCGCATCTGGATATTTTCTTTCAG  
AAGCTTTTTCCTTCTCAGACCAGTCTGAGGAGTCTCCAATTGGGACGCCTAGTTTTTAGCTTGTATCT  
ACGAGAGCGCGCATTTCTCATCTTGTATCCAGTCAATGGCTCCTTTTCTATTGTTAATTTTTGACAGGA  
GTAACGTCAGCGCATCGACACTATCTGTGCGTTCCTTACGCGGAGATACAACCTCGTGTGCCTCGGCTTC  
TGCTTGGCCAAAATCTAGCCATGAGTGCATGAATCGTAAAGAAACGTTTTCGACACGAGCTTCTTTA  
GGAGCTTCTCCGTAGCATTCTGGGAAAGAAACAAGGACATAGGGGAGGGCGGCTTTTGTGGAAAATGAC  
TCTGATTCGACTCCTGATCTAAATTTGGACGAAGGATGAGGGGCCGATGATAAGCAAGTGAGAGACAGA  
AAATACTTCTCAGTATTTCTATCTTCCGGATGAGAGGATCTTTTGAAGAAGACACTTGCATATCATCC



GAGAGATCTTCTCTTGGTAAGAATGATCACTATTCTGTTCTTGATCAGAATGTC TTTCTTGTGACCGT  
CTCTTT TTTCTCTTCTGTTGAGCAGGT TTTAACTG TTTGAGAA GAAAATTCCATTCTGGGAA GAAAG  
TTGAGCCGTTCTGTTGAATGGCTGTCTGGTAAGTACGAGAGCTATGATGA GAAACAC TTTGAGAAGAT  
GTTGGA TTTGCTCTACGGTGAGGCACGATAGA CAAA GGAACGGCTCTTATTGTGCAGCGCTGCTGGAG  
AGAAGGGAGTATTCACTCCCTGTATAGCACGAGCTGGTTGTTGGGGAGATAGGGACTCCTGAGAAGAAGG  
TAAGGAGCGAGTCTGTGAGGATCCCTGCGCCTG TAAAGAAA ATATG GAAACCTTCCAGAAGGTGCTGGA  
GGTG TTTGAGCAGAGG TTTCTTCTGTTGGAGGGATCGACTATCAGAAGAAGGGGTCTCTTCTAGAGCTT  
GGAACA TTTCTGCAATCTGAA TTTCTCAGCTCGACAGTCTCGGGAGGAAG GAAA ATGAAGGTTGAGGGCT  
AACAAGAGCGGGGAGTCTTCTTGGAGCCATATTAATATTACAACACCTACCAGAGAGATCTGAGTCTCA  
TTACCACCGTCTTCAATAGATTGAGACAGAACAACGTCTCCTATGCTTGTT TTTAGAACCCTT TTTCTG  
CAGAA GAAA ATTGAGAGGAGCTCCCTGGTTCTCCCTTAAGAGAAGCG TTTGTCGGTACGGAG GAAA GGGG  
TGTGGGAGTATCCATAGTTACAGAAGTTAATGTATCCAGGCCT TTTAGAAA GGAGGGAAC TTATC TAAAA  
AGTATT TTTCTATGCAAGTTGGATTATAGAGCTCGGCAGCATTGTTACTGTCTAAGGTTCAATATATTAAT  
AGGAGGTTAGGGAGTACATCATTGGCA TTTGTGGAGGGACAGGTAGTATGGTCAGGAA GAAAAAGCG GAA  
ATATTGATACAATGGAGAGGGAATATTGTATTTTT TTTCTGAT CAAAAGAGAAA GGTGTGC GAAA GAACC  
TAACATCT TTTGCACATATAGAA GAAAAGAGCGCAGAAGACGATAACCTATTGC GAAAATAAGCGGATAG  
AGATACCATGGT TTTCTCTATCACTCATCTATGCCAGGTGGT GAAA TTGGTAGACACGCTGGA TTTAGG  
ATCCAGTGCTTCGCGGCATGTAGGTTCAAGTCCATCCTGGGCATGGC TTTCTTCAAATACTTCTTG  
TTCAGATACCTAGTGTG TTTATTTG GATAACCCGAGTCTGTGGTTT TTTCTGCGGCATCGGAGAAAAGGT  
GGGG GAAAGTGAAT GAAA CAGCTGTCAATCCT TTTGGGATGC TTTCTGTTGAGTCTGTGTT TTTGGGG  
CTGATGCGGTGTATTTCGGATCTCTAGTTCAACCTTCG GAAA GCGTCTTGTTCAGGAGTAGAA TTTGA  
AGAACAGGAAGGGGAGCGGATTCCCTATAGTT TTTACTATCCCTACCAGTATGACTATTATTATCCCAAT  
ACAGGTGTAGACGAGGATACACCAGAGAGT TTTCAAGAGAAGCAGAGTGCCCTTGTAAGAAA CCTGTTT  
CAGAGAAA AAGAA GAAA AAACCTCGTCGAGATCTTAGATATCTCTAGGATGGTAGGTGTGGAAT TTTCT  
GATTAGGCTCTCTGAGGCTACGTGTGTATAGAT TTTCTCGTGAAGAAA TGCAGAAATGCCAAGCA TTTCT  
TGAATAATACGAAGATCCGCGTGGTTATTGAGTAGGTGCGTTG CAAACGCATGCCGCAGAGAATGCGGC  
AAATGCG TTTGGTAGTGACTAAT TTTGCATAAAA AAGTAATGCG TTTCTATACACAGGAACGATCGAGTT  
TTTCTCTGATAGACAAA AATACATGTTCTTTCAGAGGGATTTTTTT TTTGTAGTTCATCTCT GAAAGAG  
CTTAAGTAAGCGTCAATAGCTTG TTTGGCTTTGATGCTGATGGGCACGAGTCGAGTC TTTCTTCTTTAC  
CAGTAACGCGAAT TAAA ATCATCACTGATGTCCCGATA CAAA GATCACATAGTTTCGATACACGAATTCC  
TGTTGCATAGAATGTATACAGAATAGCGGCGTCTCTGCTTGCTATATGAGTGTCTAAA TTAGGGATATT  
AAA GGTGATCTAA TAAA GAATTCAC TTTCTCTGTG GAAAGGATAGAAGGGAGTCTTCTCCAGAT TTTCT  
GATGTTCTATAAAA GGGCTGTTGATCGAGCATT TTTACATCT TTTAGGAAATG GAAA AAGACT TTTAGGGC  
GATCAGTCTGCGAGC TAAA GTCG TTTAGATTCT TTTAGCT TTTATGGCATT TTTCTA CAAATAGGAAGACA  
CTCTCTTGGTTGATCTATCGGTAGCCTCAATAGAGGCGCGTTG TAAA AATAAGAGAACATCTTGCAAT  
AAGCTTGACG GAAA GAGGGGAGATTCGCGGATCCACGGAGA GAAA GATCG TAAA TTGTTCTATCAGTCG  
TTTG T GAAA GAGGGCAGAGGGAGTCAT TTTGTTA TTAGGAATA TTTGCAAGATAAAA AGCAGCAGCAATT  
TTTA TAGGGATAAAA CATT TTTAGAATAGAAGAAA GCGTAT TTTCTCCTGACAAA ATAAGAT TTTCTTTAA  
TTACGAGTGTAGGAGTTCGCTATGTTGATAATAACG TTTCTAAA AGGTACCATGGAATAGCTCTCCATCC  
TACT GAAAGAAA GATGAT TAAA TATAAGGTCTGGAGAGGATAGTA CAAAGGCGCTGGGAGT TTTATGATC  
AAGATAGCACAAA G TTTCAAACCTTACATAATGGAACCCGGAGC TAAAATCCCTATTCCCGGTTGACTT  
TGATGCGCAAGTA TTTCTCATCTCT TTTGGAGAATTT TTTCTTCTTCGCATGAGCTGG TAAATGAAGGTAG  
AGTTCCTATTCAAGGTCCCCTGCAGCG TTTCTGCAGTA TTTCAAAA TTTGAATCGCGGAGGAGTCGCTGTA  
ATGACTGAGCAGTATAAGTATTATCT TTTCTC CAAA CGGGTGTTATACGCTTCTATAGCGGATTTG CCAAT  
CCGCTTCTTTTA TCTGGAGAATATG TTTCTTTG GAGTGCA TAAA CACGCCGATCTAGAAAAAATTAG  
AAGAA GAAA AGATCT TAAA GAGATCCTTCT TTTCTATTCCGTCATGGAGCGTTGTTA CAAA ATCAGCCT  
AACCTATCCATGGAGAAGACCGAGGTTGCGCTTCTATTGGATACATTAGATGCAGCTATTGCAGAACCTA  
ATAAA GAAA GAGTGT TTTCTTTA TTAGAGAGATTCTG TTTATGCAGGGTTATCTAAA ACATTGCTCCCACG  
TTTG TATGATGAAGAGTATCAAGGCATAGTATCGGAAGATCCCAGACCAGGGAATGAGGCTGTTCCTTT  
TCATTACTGAGAGCTGCAGCTCTCAGTATGCGGAGGATT TTTA TTCAGAGAGTGATGGGGTTGTTACCT  
TACTGCTGCGCTTCTCCAGAATTCCCTTGGGTCGGTGGATTGGCCTGTAT TTTGAGAATATTGGGGA  
GAT TTTCTTTCTGAATGGTCTAA GAAA ACCATTTCGAAGAGTGAT TTTAAA AGCTCACG TTTCTAGGGAGCTT  
GCGATCATTAGTCCAGGTGTGTATTTCGTCTCG TTTCTCGTGTGCAAGAACAAGGTAGAATTATCTCTTGT

AAATAAAAATCTTTTAGAAAAAGTGGAGATAAAAGCCGGAACCACGTATCTATGGGACCGTTTTTGTA  
ATAAAATGAGAAAATATTGTGGATCCTTTTTCCTAAAATACTCAACACGTGGAACCTCTCGTTTCGGTA  
AACAGAGCAGTCCACAAGATCTTTTGGGAATTGTTTCCTGAAAGTTTGAATCAAGATCGGATAGTTCTTT  
CCGCCCTGGGCAGAGACCGTTTTGTTGAGTTGCGAGGTAAGATTCAACAGGCAGAGTCGCACCATTCA  
GGGATTTTTCCTCTCCTGTAATGAAAGGAATTTTCCTCCCAAGATTATCGAGTCTATCATCAAAATGGTT  
TATTGGCTCATGATCCTTATGCCTTCCCCTTACTTTGTTGGGGGAAATCGATTCTTTTATTCCATGAAGG  
GACTCATCAGCGTATCTATGAACGCATGGGTGCTATCCCTTGTGAAATTGATGGAGTACCTGGAGTAAGA  
TTTATTGTTTGGCCCTCATGCTCAACGTGTTTCCTGTTATTGGAGATTTTAAATGGGTGGCATGGGCTCG  
TTAATCCTCTTCATAAGGTTTCAGATCAAGGAGTTTGGGAGCTGTTTGTTTCTGGCCTTACAGCAGGAGC  
TTGTTACAAATGGGAAATGGTCACAGAATCTGGGCAGGTTCTCATTAATCGGATCCTTATGGGAAGTTT  
TTTGTCTCTCTCGGAGCGTTTCCTGTTTATCGATGATTCTTATGAATGGAACGATAGCGAGTGGT  
TAGAAGAGCGCATTAATAAGACTGAAGGCCCTATGAATATCTATGAAGTTCATGTAGGGTCTTGGCAATG  
GCAGGAAGGACAACCCTTGAATTAATAAGAGCTAGCAGATCAGCTAGCTCTCTATTGCAAGCAGATGCAT  
TATACGCATGTAGAGTTGCTTCCCCTAACCGAGCATCCCTTGAATGAATCTTGGGGATATCAACAACCG  
GATATTATGCTCCTACAAGTCGTTATGGCTCTTTTGAAGATTTACAGTATTTTATAGATACCATGCATCA  
GCATGGTATCGGGGTGATTTTAGATTGGGTTCAGGACACTTCCCTATAGATTCAATTGCAATGAGTGGT  
TTTGGATGGCACTCCTCTGTATGAATATACACGGAATCCGAGTCCGTTGCATCCTCCTGACACACTTACA  
CTTTTGGATTATGCTAAACCGGAAGTGTGCAATTTTCCTTTAGGAAGTGCCTCTTTTGGATCGATAAAAT  
GCATGTAGATGGTATTCGTGTGGATGCTGTCTCATCTATGCTTTTATTTAGATTATGGAAGATATGCTGGA  
GAATGGGTTTCAAAATCGTTATGGTGGAAAGAGAGAACCCTTATGCGATTTCGGTTTCAGCAATCAACA  
CTGTGATTCATGAGAAATATCCAGGTGTTTTGACTTTTCGCAGAGGAGTCGACAACCTTCCCTAAGATTAC  
TGTATCTGTGGAAGAAGGGGATTAGGGTTTGATTACAAATGGAATATGGGATGGATGCATGATACACTG  
CATTATTTTCGAGAAGGATTTCCATATCGTCTTATCACCAGAGCGATCTCACTTTCCACAATGGTATG  
CTTTTAGTGAGAGGTTTACTGCTTTTTCCTATGATGAGGTTGTTTATGGGAAACCGAGTTTAAATCGG  
TAAGATGCCTGGAGATGCTTGGAGACAGTTTGTCTCAGTTGCGTTTATATTAGGTTATCAGATCTGTCAA  
CCAGGAAAGAAATTGCTTTTCATGGGGGAGAGTTCGGTCAGGGGAGAGAGTGGTCCCCCGGTCGTGAGC  
TAGACTGGGAATTATTAGATATTTCTTATCATCAAGGTGTGCAATTTGTGTTTCGCAAGAGCTAAATGCTTT  
ATATGTGCAGAGCCCAGCAACTGTGGCAAGCGGACCATCTTCCCTCCTTTTCCTGGGTCGATTTTAGT  
GATGTGCGTAATGGCGTTGTTGCTTATCTCCGCTTTGTCAGACGCGGATGCTAAGAAAGCTTTGCTTTGCG  
TGCATCATTTTGGGTTAGGATACTTTCCTCATTACTTACTTCCCATACTCCCCCTAGAATCTTGTGATTT  
GCTGATGAATACAGATAACACAAGATTCGGGGGATCGGGGAAAGGTTTTCGAGAGCCTGAAATCCTTACA  
CCTGAAATCGCGAGACAAGAGAGAGAGGCTGCAGGACTGATCGAAGCGGATGATGAAAGTGGTCCCGACT  
GCTGGGCTTAGATATTGAGCTGCCTTTCAGTACTCTGATTTTCCTGTAAACGCTACAGTAGGATTT  
GTTCTTAATCCGTAGTTGGCCAGCTCAAAGATGAGTATCTAGACATAGCTTGTTCGGTTGTAGAGATAA  
AATCAGCGAGTAGAGCTTCTCTCAGATGGGTTGTAGGTACTTTCTCTCAAGATCAAAGTCAGGATTT  
TTCTAGGTACCACGCCAAGAATTGACAGCACCAAGCTCCACAGGTGAATCTCCAGGAGATTGGACTTTT  
ACTGTGCATCCGATGCGTACCTGGAAAGGAGAAATGTAATCTTCTTGTATCGGAGTCTGCTCCACCTCTT  
TGGGATAGATAGCTCCAAGGGAGACGGCAAGTCTTCTAATTGTTCCCGCATTTGTTGTGGAGAGGCTAC  
ATAGTCGCACAAATCTGTGCAAGAATGTGACACATCGATACTCGATATCTACGATAACCAGTACCCAGTGA  
CTATTTCTACTCGCCAGAGCTCATAGTCTGATCCATTTTCGTAAGCATAGCTTCTTGCATATCAGCAG  
AAGGATCATGCCACATAACGAATGGGAATACACTAGAGGTGCACAGAAGTCGTCGATAGTTTTCGTTGT  
GCAAGTCGGAGGACAAGAAAGCTCGCACATGTGCGTTTCGTTGACGTTGACGGATTGTTTCGTCATGAGG  
CAGTTACAAATACATCTAAGAAATTTGAATTTGTAAGCGGATTACAGATGTCTATAGGGAGAACCAGCC  
TGTGTTTGTCTGCATTAAGCACGAGAATTGGAAATAATGTTCTGTTATCCCAGATAGGAAGAGGAGGACC  
GGTTAAGACGTCTAGTTGTTGTAAGAGCTTAGTTGCTTGTGTTCCCTCTTGTGCTAAGTAATCC  
GCATCTAAAGGTCACGGAATGTATATGCGCAGAGAATAAGTCCGCAAGAGATCACTATGAGGAATAGCG  
CTATGATGATTCTAGTAACTTTAGTATCGCAAGAAGCATCTTTGAAAGATGTATAGGTAGTTGAAGGTCT  
AGAATACGAACATGTTTGTGGGGGAGGATTATGAATTGGTTCATAATAATTTGTTCAATTTATTAACAG  
ACAAAATAATTATATCTGAAATGGGGTTTTCAGTTAAATTAATCAAAAACAAAATTTTATAAAAATTT  
TTTATTAATTTCAAAAATAACAATATCCCTGCTGCTTATAAAAAGAGCAGATGAAAATAGTAAGAAATAA  
GAGCGACCATCTCTCGATGGCCTCTTATTTAAAAAGATTTTTAGATTAGAAAAGAGTTTATGCTTCAGGC  
CAAGAAAGCTCTGGGAGATCCTGAACAGCCGCTTCGCAAGCCTGGAATAATGAGGCTAGGTTTTCATGGC  
GTTCTACAGAATCAACGGGGAGATCATTCAAAAGCTCTGTAAGGGGATCTTTCAAAATACCAGTGAAAA

TTGACAGCACCAAGCGCCGAGCTGGATCCGGAGCCTC TTTGGATTACCTCC TTTGCTGCAATC TTTACA  
GAGAA TTTCTTGCTGTCATAGGCAGGATACACCTGGTCTAGTTGTTGAG CAAA GGATTGAAGCTCTTTT  
TCATAT TTTCTGGAGGCATCACATAGTTGTATAAAA CTAT CAAA ATAGACCAACCGACGAGCTTGAATATC  
GACAATAACAAGTAGCCAGTGA CTGCTCCTACAGATCCTTTTA TAGCTAGCTG TTTTCATAGTCTGCATG  
GTATCCGAGAGTGT TTTGGAGTAGGGTGATACCACA TAAACACAGGGAGGAGGGTTGTTC TTTGTAAAT  
GGCGCGGTAATTCTC TTTTGAACAGCAGATAGGCAGAGGGCC TTTGATAGGCTCCCCTCG TAAAACAGC  
TTT TTTG TCTTC TAAAATCGAGATGAT TTTCTG TTTAAA GTTGAATATGGTAGCTGGGGGAAGGTCTCC  
AGAGGAATGAGACCTGGG TAAA GGGTGTG GAAA TAGCATAGACACTT GAAA ATAATGTCAGAATCCCAAG  
CAGGAACCAACGCTTCGATGGTCTGTCGTCGAGCCATATCTTCATACATCTCTA CAAA CACTTGCTCCGG  
AACCAAGGGAAGGAGGTCTTCTTGCGT TTTAACTGG TTTGGGAGCCTTAGGAAGAAGAGGAGGAGGTGTA  
GAGGGC TTTGGAGCAGAAGGAGTACTAGGACGTGATATGACGGGAGGGGGGGGAGTACTAGGACGCGGTA  
CGGCAAGAGGAGGAGACGGAAGAGGTACTGGAATAGAGATGGTAGGTTGCTCCTTAGTAGAAGGGTGTGT  
TTGGCAGCACCAAGGGAAGGATTGTAGATCA GAAA AGGAGTAAA AGAGGAGAATCAATCC TAAA GTAACA  
ACAACAAGAAGAACAGC TAAAGCTGTACGAGCTACTT TTTGTAAA AGTTGG TTTTC GAGGTTCTTCAGAGA  
TAAGAACTGGTTTC GACGAATCCCAGGAGGAACAGGTGCCGTC TTTGAAGTTGAGTTGGTGGGAGATAA  
CATAGGGCTATTTG CTTAATTAACCTG TAAAGAAA GCATTAT TTTAGGAGATATACTCTTT TTTGCCAT  
GGG GAAA TTAAGACTTCCCTCTAGC GAAA TCCCAT GAAATTATAG TTTGTTC TTTAAAATC TAAAATAGA  
CGGGAAGAGGATAAGGGGGCCGGAGCCCCCTCTATTACTCTAGAATCGCAGAGCAA TTTCCCATTGAGA  
TAATTACAGAAGGTTGAAGAGGAGTAGAATCCATGATACTG GAAA TGGAGAGTTAACCAACT CAAA GGTT  
GTGT TTTGCTGTGAGAT TTTATAGGACATGGCATGACGCGATGAGGGGCTTCCACTAC CAAAC CAAA TACC  
TTTACTGGCTAGGAGCTGGGTCCGATCTCTAGTCTTGTCTATACAGAACGGGTTGGTATGCCAATTCT  
ACAGTCCAGGCTTGAGGTC TTTGGTAGCATTCA TAAAGCTACC TTTAACTCCAATAGGGACTAGGACAT  
TGAT CAAAGGAGTC TTTGTAGAAA AGCTTCGCGGATAGGCTCCACCTCAG TAAA GTGAGACAGGCTAGA  
ATAAA TACCAAGAGCACCTAAA AAGGAGCTGTCAGTATATGCGTTGATC CAAAGGG TTTTCATAGGGAGA  
TCAAAA AAAACAGCACCTCCCATCG TTTGACTACGGAACGTCCCTTGAGATGTTAGAT TTTCTCCTTGGG  
TATAGAAA TGGTGACAGTTATGATCTCCATAGCTG TAAAGACCAACTAA TTTAGCCAGCAAGAAA CTTTC  
TTGCAATGAGAAGAGCA TTTCTCCTTGGCATGAGTAATT TTTAGAAGATACGTTGTT TTTTCGCGTAACGC  
TCATTGAG TTTGGTGTAGGTCTGACTGAA TTTCAATGAGAAGGTATGTGT TTTGCCCTGCTATCATCCCCG  
CAGAGTATCCGGAAGAGCGCATATGGAATCCAGGATGAT TTTCTCGAGGATCTTGG TAAACCATCATGCC  
TAGTCCCTCCTGTAATTCCCCA GAAAGGATGATCACTAGGTGTCAGTTCTGCACCTATTT TTTAAGCTT  
TC TGTGCAAGCAGCATATTTCCCCATAAGGTATTCGCTATGAGGGGACTTCTGTG TTTCCGGCTAGGAA  
CATACCAGCAGGAAGCCAAGTCAGTAATAAGGTTCTATGGAATCTATTGGCTTT TTTGGGATCTGTGAT  
TGTGCTGAAGATGCTGGTCTGGATCTTGAGTT TTTGCCAGCCCCAACTC CAAAGTCCCTGCCATCCA  
TAATGAGGGACATTTAGTCCCGA GAAA TCCATATCATCAGATCTTAGCTGGTTATCACTAGCCTCAGAAA  
TAGATAGCATAGGCTGTGATGACAGAGCATGGGTAGATCTGTGGATTATAAGGAGAATTTCCATAGTC  
ATCAATGAGTGAGAGT TTTACATCACTTAAT GAAA AGGTAGCTGCAGTATCTGCTGTATAGTTATTGCTG  
TTA TTTGTAGGCTCTACCCACAA TAAA GGAATCTCAGCACCCT TTTTCAGAATGGAA GAAA GATTCAATC  
CAATATGCTTCAGTGTATAGAGGCATTGCTAGCAGAA TTTCTGCACCATT TTTA TAGCAACTCAGAAC  
TGCTCCATTTCCCAAGA GAAA CAACACCCCCAG TTTGTGTGAATCGATTCACTGTAAGCTGAGCATGATCT  
TCGATACATA GAAA ACCATTACTGAGAGTAAGGGGTGCAGGTGTT TTTGTTTGTAAA ATTGCGTTGAT GAA  
AATCTGCAGAATTAACAGTAGCTCCT GAAAATACTACAGAGCCTG TTTGATCAGCTTCCCTTATTGAAGGA  
CACAGAGACCCCTGCATTGCTAACTTCAATAGGATCA TAAAAAAT TAAAT TTTGGCTACTCCCTGCTCCT  
AATAGAA TTTTACCAGAGGAGCTTGCTACTGTTATTGCAT TTTCTTCTAGGAGGATTAGCTGACGTACTGG  
TACCA TTTGCATTAGTTACATTAGTCACAATAT TTTTCAT TAAA AATAATAGCATGGCGGTCCGGCAGAAA  
TTTGGAGTTGCTGGTTCCGTCTATATAGATAGCGCCCCCTTATTATTGGCGATATTG TTTATAAA GTAG  
GTAGGGCCATTATCCACTAGGGTAACTACAGGAGCG TAAATAGCTCCGCCATAATTT TTTGTGATATTGT  
CAC TAAA AAAGATCTACCACGATGCTGTAACATCTAGGCGAGTAGTTAC TTTA ATTGCTCCTCCATC  
AGAAGATTCTGAAGAAGCTG TTTCTACATT TTTAAA GCAGCGATTGTTATA GAAA ACGATGTTACCACGA  
TTTCTGTTAGAGAACAGATAGGGGAGAAGATCGCTCCTCCTGCACAACAGGCGTTATTGA TAAA GAAGA  
GATCGCAGTTATTACTCT CAAA AGAATTGCTCGTTCAGCATAGATAGCGCCACCT TTTCTGCTGTATT  
AG TTTGAATACAGATGTTGTCCA TAAA GAGAAA ACAAGACTGATTCTCGCTCACA CAAAGGTATTAGCG  
GTACTAATGGCTCCTCCTCGGACATAA GAAA AGTTCTTCA TAAA TCCGACCACATCATGATTGTGAT TTTA  
TG TAAA GAT TTTGAGCATGAATGGCTCCGCTTCTCTTAT TTTA TTAACAGCTGCATTAGGATTACTCGA

TG TAAA TGGTCTGCAACAAGTATTAT TTTCAAAGATTACAGGACCTATTGTATCACGAATCTCCACGGTA  
GGAGAATTGGGACTCGCATAACCAATCGCACCACCAC TTTCAAGGGGTGAGATTT TTTGCAAAA TAAA TAC  
CTTCTT TTTGTGTAT CAAAAAAGCTTAGGTAATCTGTTATTGTGACAGCAGCTCCTTCATTGGGAGTTT T  
TTGTAGAATAGCCAGTATGTAGCGTAGGTTATCGAGATAGCAGTTAGTGAGATTGTGAGTGTCTCCTGT C  
AAA CTAAT TTTATTTG ATAGCGACTC TTTCTGATAGGATCTGGAAGTGAAGTGGGCATAA GAAA GATTCTAG  
AAGGAACCTCTCTAGCTAGTCTGATAGGGAGCTTCCAATAAG GAAA AAAAAAGAAATGCTTT TTTCA TAGT  
TAAA AGACCAGAGCTCCTCCTGCATTTGATGTAATGTGAGACAGTGAAGTAGCCACTTCTGCTTGATAGT  
TAG CAAA TAGTTTC AGATGAGAGAA TTTAAGGGAGTGAGAACCCTCCTCCCA TAAA AGGAATG TTTAGCTAA  
TGGAGTA TTTGTGGTGACCCAAGAACC GTTAT TTTG GATTAATAGTGTATTGAGTAGAGGGCG TTTCCAG  
TATAGGGTGGGTGGTAAGCGAGTTCCA TTTCCAGGAGAGTGTGGCCAAGTATCAGAAGAATAAGCTC  
C TTTAATTCTTATTGGAGAGACAATGGCAGTATGGGCTTGCTCTAATG TAAA TAATCTAGCTAGATCACC  
GC TTTCTCGGATAGCACC CGGT TTTGTGCGAGAGAA TAAAGCTTGAG CAAA TGGAGTGAAGCATTATTGAT  
CGCAAGGGCATGCTATCGCGTAGTTACAGCGAAGGGAAAGCTCCTAAGGTTGTAGAGT GAAATTTCCCTT  
TAGAAGATCTTTTA GTTCCATA GAAA CTTCCGATGTTATGTGTTCCATAATTACAAGCTGCTGCTCCGAT  
AAGAGCAATGCGAT CAAA CATAGGATGTTCA GAAA CA TAAAGCA GAAA GATAGTAACGAGAA GAAA GCGG  
TTAT TTTGTTTCTT TTTCTTTT CATCTTATCAGATGACTGGGAGAAG GAAA GAAGAAA CTTATGACCATGAG  
CTCCTGATGCTTGAGAAGAGACGGTATACCCT TTTGATGCAGAAGAGTAGCCATGATAACT TAAA CGTT T  
TTGTTGT TTTGTAAA TAATGTTGTGTCAGCTCCTTG CAAAG CAAA CCAAGAGTTATCTGGGAGTAATGAT  
CGTAAGCCCATGGTCATG TTTCTTCTGAATGCACCAAGCTATTTCGCTATCAGATCTCCTCTACGAATAG  
GATCTACTATGTATCCGACTGGGGTCCAG TTTA CAGTAAGAGTGTGTCGGGTAAC TTGTACATCAGTTGT  
AGTAGAAGATCCGGATCCACTTCTGCAGAAGC TTTAATACTAGGGATGCCAGCTGTAGTTGTGCTATTA  
GGAGTGAATGTTTC ACTAGTTTT TTTCTGCTCAGCGATAGAGTTGGCAGATGTTGGAGCTGAAGAATTAT  
TATTAAGCGTGATGGTATAGGTTGTTGTTATCCAATTAGGAGTCCATAGACCTTGATAGCCGTAGTGTGG  
AGGAGAGAGTAGAGAAGTATTCAGAGAAT TTTG CCAATTGGGGCCTAATTGCCATCATTAGTGG TTTCT  
ATGGATAGAATTGGTTGTTCTGCT TTTCCCTCTGGAGAGTCCATACTGTGCTAGACTGATT CATAAT TTT  
CGTCTACAATT GAAA GCGCCCAT TAAAGATAATCATTGGAGTGCTTATACTACTTGTGCTTGATGGAGT  
TTG GCGGTATCAGTAT TTTGGTTCATATCTGTGGGTTGACGCGAATACAAGCGGACTCTTCCCCTCT  
TTGAGAATAATGGG TAAAATAACACCAAGATTTG TAATATTGAGCTTACCGTGC TTTCCAACAGTCAGCG  
TAGCGCCGCTTCC TAAAGCAAGTAGACTAGTTGGATTCTGGG TAAA AGGGATGT CAAAAAATTCTAGTTC  
AGCACCATCTTCTATGGC TAAAGTGC CAAATTTCAAGGTAGTAGGAGCCTCTCTAATATAATTATGTTCT  
GTTCCATAAGAGTT TTTATGTGCTGCTGGACATTTGTTTATAAGAGAATACAACAGCTCCAGAGAACTCTT  
CTATAGGATTAATAGTGATTACA TTTCTACTACTGGGGATACTTGAGCATTATTAGGCTCTCGCACACG  
CTCCCAT TAAA AAGATCA TAAA AGTAGATACGAGTATCTTCT TTTAGCCCCAAGGGATAGTGATAAGGT  
GTCTGCGTGTATTATTAATAT GAAA AAGT TTTCCGATCCCTAATAAGTTCCGAT CAAATTTAAA TACGA  
CATTATTAT TAAA AACAATATCGCCTGTCCCTGTATGGATATAA TTTGTGGCCGGACGCAG TTTCGATAA  
ATTAAA GGCTGCTCCCAGGCAGCAGAGTTA TTTAGAAA ATAGATAGGACC GTTA TTTCCGGATGTCAATG  
TAACCACAGTCAATAGCTCCCCGGCATGAGCAGCGGTATTGCTATC GAAA TAGATAGGACC TTTA TTGT  
TTTG TAAA G TAAA TCCTTGCTGCTG TTTGAATGGCTCCTCCGTTACTTGCATGAGTAGA TTTGTTCCATCC  
TATGGAAC TATTG TTTGAAAAAACAATTC TTTCTTCAATTATTGCTAATGACGCATTTGGGTAGCGCTAATA  
GCTCCGCC TTTCCACCTTGTTGTAGT TAAAAATTATGGGACCAGATTATTACTAATAGAGCAAGAGC  
TT TTTCTGCTACAGATTGCTCCTCCTCGAGCCATAT TTTCCGGCTCGCGTATCTGGTATATGATTAAGCGT  
GTGATTGTTCT CAAA TAAA ACTCC TTTAGCAGTATCAGTTATTGATA TTTGAGTGTTAGCGGGGATAGCT  
CCCCCGCAGTCTCCAGACATATTGTTAA TAAA GGGCAGAGTTCGATTCCCTGTGAGTGTATTC TTTG  
CATAAA GCGCACCACCCTATTTT TTTCTGCTTTTATTTCTGTCCCCGTATATTGAGCTCCGGCTGTTGT  
GTTATTA TAAAAAAGTACGTCTTGATTATTGAGAACC GAATAGGGCC TTTAGAACGAATAGCTCCTCCC  
CCCTTGTTATGTGTGACAGTAGTTGTTG CAAA AGAGTAGGTTAGCATTATTAGAGGGCCGTGAATGAGATAG  
TAACCATAT CAAA AACCCCTCCAGCAGCAGAGGTAGTGTTAATAGAATTA GAAA AGA TTTGCG TTTGCGT  
ATTGTCGCAATAGTG CAAACTCCTCTTCCCCATGAG TTTA TAT TTTGAAAAGGTGACAT TTTGAGCAGTA  
AT TAAA GAGACAGGATCTAGGACGAACTGAATCTCTGTCC GAAA AAG TAAA TCGCCGGAAGTGTAGCG  
TATCCG TTTCAATTAGCTTG CAAA ATGGATATAGTT GAAA GATAAAAAAACTGAGGCAAG CAAA GGATAG  
AGAAGTCT TTTAATCATCGCAGGT TAAA GGGGGGATGTTAT TTTAGCCTG CAAA TAGTGTAATTATTGG  
AT TTTGTAAA GAGAAA AGGACGAATGCGCTGAAGATAAGAACA TTTA TTGATAT TAAA TTATTAATTTT  
TATGAAGCGGAGTAATTAAT TTTA TCTCTCAGCT TTTGTGTGATG CAAACGTC TTTCCATAAGTTCT TTTCC

TTTCAATGATTCTAGCTTATTCTTGCTGCTCTTTTAAATGGGGGGGATATGCAGCAGAAATCATGGTTCC  
TCAAGGAA TTTACGATGGGGAGACGTTAACTGTATCA TTTCCCTATACTGTTATAGGAGATCCGAGTGGG  
ACTACTGTTTTTTTC TGCAGGAGAGTTAACAT TAAAAAATCTTGACAATTCTATTGCAGC TTTGCTTTAA  
GTTGT TTTGGGAACTTATTAGGGAGT TTTACTGT TTTAGGGAGAGGACACTCGTTGAC TTTGAGAACAT  
ACGGACTTCTA CAAA TGGGGCAGCTCTAAGTAATAGCGCTGCTGATGGACTG TTTACTATTGAGGGT TTT  
AAA GAATTATCCT TTTCAATTGCAATTCATTACTTGCCGTA CTGCCTGCTGCAACGACTAATAAGGGTA  
GCCAGACTCCGACGACAACATCTACACCGTCTAATGGTACTA TTTAATTC TAAAAACAGATCT TTTGTTACT  
CAATAATGAGAAGTCTCATTCTATAGTAA TTTA GTCTCTGGAGATGGGGGAGCTATAGATGCTAAGAGC  
TTAACGGTTCAAGGAATTAGCAAGC TTTGTGTCTTCCAA GAAA AACTGCTCAAGCTGATGGGGGAGCTT  
GTCAAGTAGTCACCAG TTTCTCTGCTATGGCTAACGAGGCTCCTATTGCCTTTG TAGCGAATGTTGCAGG  
AGTAAGAGGGGGAGGGATTGCTGCTGTT CAGGATGGGCAGCAGGGAGTGT CATCATCTACTTCAACAGAA  
GATCCAGTAGTAAGTT TTTCCAGAAA TACTGCGGTAGAG TTTGATGGGAACGTAGCCCAGTAGGAGGAG  
GGATTTACTCTACGGGAACGTTGC TTTCTGAATAATG GAAAAACCTTGTTTC TCAACAATGTTGCTTC  
TCCTG TTTA CATTGCTGCTAAGCAACCAACAAGTGGACAGGCTTCTAATACGAGTAATAATTACGGAGAT  
GGAGGAGCTATCTTCTGTAAGAATGGTGC GCAAGCAGGATCCAATAACTCTGGATCAG TTTCC TTTGATG  
GAGAGGGAGTAGT TTTCTTTAGTAGCAATGTAGCTGCTGG GAAA GGGGGAGCTA TTTATGC CAAAAAGCT  
CTCGGTTGCTAACTGTGGCCCTGTACAATT TTTAAGGAATATCGCTAATGATGGTGGAGCGATTTATTTA  
GGAGAATCTGGAGAGCTCAG TTTA TCTGCTGATTATGGAGATATTAT TTTGATGGGAATCT TAAAAGAA  
CAGC CAAA GAGAATGCTGCCGATGTTAATGGCGTAACTGTGTCTCACAAGCCA TTTGATGGGATCGGG  
AGG GAAAATAACGACATTAAGAGC TAAAGCAGGGCATCAGATTCTC TTTAATGATCCCATCGAGATGGCA  
AACG GAAA TAACCAGCCAGCGCAGTCTTCCAAA CTTC TAAA AATTAACGATGGTGAAGGATACACAGGGG  
ATATTGTT TTTGCTAATGGAAGCAGTAC TTTGTAC CAAAATGTTACGATAGAGCAAGGAAGGATTGTTCT  
TCGT GAAAAGGC AAAATTATCAGTGAATTCTCTAAGTCAGACAGGTGGGAGTCTGTATATGGAAGCTGGG  
AGTACATTGGAT TTTGTA ACTCCACAACCACCACAACAGCCTCCTGCCGCTAATCAGTTGATCAGC TTT  
CCAATCTGCATTTG TCTC TTTCTTC TTTGTTAG CAAA CAATGCAGTTACGAATCCTCCTACCAATCCTCC  
AGCGCAAGATTCTCATCCTGCAGTCATTGGTAGCACA ACTGCTGGTTCTGTTACAATTAGTGGGCCTATC  
TTTT TTTGAGGAT TTTGATGATACAGCTTATGATAGGTATGATTGGCTAGGTTCTAAT CAAAAAATCAATG  
TCCT GAAATTACAGTTAGGGACTAAGCCCCAGCTAATGCCCATCAGAT TTTGACTCTAGGGAATGAGAT  
GCCTAAGTATGGCTATCAAGGAAGCTGGAAGCTTGCCTGGGATCCTAATACAG CAAA TAATGGTCTTTAT  
ACTCT GAAAGCTACATGGAC TAAA ACTGGGTATAATCCTGGGCCCTGAGCGAGTAGCTTC TTTGTTTC CAA  
ATAG TTTATGGGGATCCAT TTTAGATATACGATCTGCGCATT CAGCAATTCAAGCAAGTGTGGATGGCG  
CTCTTATTGTCGAGGATTATGGG TTTCTGGAG TTTGAA TTTCTTCTATCATGACC CGCATGCT TTTAGGT  
CAGGGATATCGGTATATTAGTGGGGT TATTCTTAGGAG CAAA CTCCTAC TTTGATCATCGATG TTTG  
GTCTAGCA TTTACCGAAGTATTTG GTAGATC TAAA GATTATGTAGTGTGTCGTCCAATCATCATGCTTG  
CATAGGATCCG TTTA TCTATCTACCCAACAAGCT TTTA TGTGGATCCTA TTTGTTCCGAGATGCG TTTATC  
CGTGCTAGCTACGGG TTTGGGAATCAGCATAT GAAA ACCTCATATACA TTTG CAGAGGAGAGCGATGTT  
GTTGGGATAATAACTGTCTGGCTGGAGAGATTGGAGCGGATTACCGATTGTGATTACTCCATCTAAGCT  
CTA TTTGAATGAGTTGCGTCC TTTCTGTGCAAGCTGAGT TTTCTTATGCCGATCATGAATCT TTTA CAGAG  
GAAGGCGATCAAGCTCGGGCATTCAAGAGCGGACATCTCC TAAA TCTATCAGTTCCTGTTGGAGTGAAGT  
TTGATCGATGTTCTAGTACACATCCTAA TAAA TATAGC TTTATGGCGGCTTATATCTGTGATGCTTATCG  
CACCATCTCTGGTACTGAGACAACGTCCTATCCCATCAAGAGACATGGACAACAGATGCC TTTCA TTTA  
GCAAGACATGGAGTTGTGGTTAGAGGATCTATGTATGCTTCTCTAACAAGTAATATAGAAGTATATGGCC  
ATGGAAGATATGAGTATCGAGATGCTTCTCGAGGCTATGG TTTGAGTGCAGGAAGTAGAGTCCGGTTCTA  
AAAAATATTGGTTAGATAGTTAAGTGT TAGCGATGCCTT TTTCTTTGAGATCTACATCAT TTTGTTT TTTA  
GCTTG TTTGTGTTCCTATTTCGATGGATTTCGCGAGCTCTCCTCAAGTGTAAACGCCTAATGTAACCACTC  
CT TTTAAGGGAGACGATG TTTA CTGAAATGGAGACTGCGCT TTTG TCAATGTCTATGCAGGAGCTGAAGA  
AGGTTCGATTATCTCAGCTAATGGCGACA TTTA ACGATTACCGGA CAAA ACCATACATTATCA TTTA CA  
GATTCTCAAGGGCCAGTTCTT CAAA ATTATGCCTTCA TTTCA GCAGGAGAGACACTTACTCTGAGAGATT  
TTTC GAGTCTGATGTTCTC GAAAAATG TTTCTTGGCGA GAAA AGGGAATGATCTCCGG GAAA ACCGTGAG  
TATTTCCGGAGCAGGCGAAGTGAT TTTCTGGGATAACTCCGTGGGGTATTCTCC TTTA TCTACTGTGCCA  
ACCTCATCATCAACTCCGCTGCTCCAACAGTTAGTGATGCTCG GAAA GGGTCTATTT TTTCTGTAGAGA  
CTAG TTTGGAGATCTCAGGCGT CAAA AAAGGGGT CATGTTTCGATAATAATGCCGGAA TTTCCGGAACAGT  
TTTTCGAGGTAAGAATAATAATAATGCTGGTGGTGGAGGCAGTGGTTCCGCTACACCATCAAGTACGACT

TTTACAGTTAAAACTGTAAAGGAAAAGTTTCTTTCACAGATAACGTAGCCTCTTGCGGAGGCGGAGTGG  
TTTATAAAGGCATTGTGCTTTTCAAAGACAATGAAGGAGGCATATTTCTCCGAGGGAACACAGCATAACGA  
TGATTTAAGGATTCTTGCTGCTACTAATCAGGATCAGAATACGGAGACAGGAGGCGGTGGAGGAGTTATT  
TGCTCTCCAGATGATTCTGTAAAGTTTGAAGGCAAATAAGGTTCTATTGTTTTTGATTACAACTTTGCAA  
AAGGCAGAGGCGGAAGCATCCTAACGAAAAGAAATTCGCTTGTAGCAGATGATTCGGTTGTCTTTAGTAA  
CAATACAGCAGAAAAGGCGGTGGAGCTATTTATGCTCCTACTATCAATATGAGCACGAATGGGGGATCG  
ATTCTGTTTGAAAAGAAAACCGAGCTGCGGAAGGAGGCGCCATCTGCGTAAGCGCAGCGAGCTCTGGTTCGA  
CTGGCAAGCTCACTTTAAGCGCTTCTGATGGGGATATTGTTTTTTCCTGGGAATATGACTAGTGATCGTCC  
TGGAGAGCGCAGCGCAGTAAGAATTTTAAGCAGTGGAACAACAGTTGCTTTTGAATGCTTCCGGATTATCG  
AAACTGATCTTTCATGATCCTGTAGTACAAAATAATTCAGCAGCGGCTGCATCGACACCATCACCATCTT  
CTTCTTCTACGCCCTGCTGCAGTACAATTAATCAGTCCGGTAATGGATCTGTGATTTTAAACGCCGAGTC  
ATTGACTCCTTCAGAAAACCTTCAAGTTCTTAACTCTACTTCAAATTTCCAGGAACCTGACTGTGTCA  
GGAGGGGAGTTGGTTGTGACGGAAGGAGCTACCTTAACTACTGGGACCATTACAGCCACCTCTGGACGAG  
TGACTTTAAGGATCCGGAGCTTCGTTGTCTGCCGTTGCAGGTGCTGCAATAATAATTATACTTGTACAGT  
ATCTAAGTTGGGGATTGATTTAGAATCCTTTTAACTCCTAATAACTATAAGACTGCCATACTGGGTGCGTAT  
GGAACAGTTACTGTAAAAGAGGCTCTACTTTAGACCTAGTGATGGAGAATGAGGCGGAGGTCTATGATA  
ATCCGCTTTTGTGGGATCGCTGACGATTCCTTTGTTACCTATCTTCTAGTAGTACTAGTAACGGGGT  
TACAATGAAGCGTGTACTATTAATGATGCAGATGCTGCGCACTACGGGTATCAAGGTTCTTGGTCTGCA  
GATTGGACGAAACCTCCCTTAGCTCCTGATGCTAAGGGTATGGTGCCCTCCTAATACAAGTAATACCTTAT  
ATCTGACATGGAGACCCGCTTCCAACCTACGGGGAGTATCGATTAGATCCTCAGAGAAAGGGGGAATTTGGT  
GCCCAACTCTCTTTGGGTAGCGGGATCTGCATTAAGAACCCTTAATAATGGTTGAAAAGAACACTATGTG  
TCTAGAGATGTTGGAATTTGTAGCATCTCTGCATGCTCTCGGGATTATATTCTGAATTATAACGCAAGATG  
ATCGGGATGGCTTTTAGCTAGATATGGGGGATTCAGGCGACTGCTGCCTGCCATTACGAAAATGGGTC  
CATATTCGGAGTGGCTTTTGGACAACCTATATGGTCAAACAAAAGCCGAATGTATTACTCCAAGGATGCA  
GGGAACATGACGATGTTGTCCTGTTTCGGAAGAAGTTACGTAGATATAAAGGAACGAAACTGTTGTGT  
ACTGGGAGACAGCTTATGGCTATTCTGTGCACAGAATGCATACGCAGTATTTTAATGACAAAACGCAGAA  
GTTTCGATCATTCGAAATGTCATTGGCACAACAATAACTATTATGCGTTTGTAGGTGCTGAGCATAATTTTC  
TTAGAGTACTGCATTCTACTCGTCAGTTCGCTAGAGATTATGAGCTTGCAGGGTTTATGCGTTTGTAGA  
TGGCTGGAGGATGGTCCAGTGTACACAAGAAACTGGTTCCTTAACTAGATAATTCGCTCGAGGAGCGGG  
GCATAATATGTCTCTCCCAATAGGAATTGTAGCTCATGCAGTTTCATGTACGAAGATCTCCTCTTTCT  
AAACTGACGTTAAATATGGGATATAGACCAGACAATTTGGCGGTGCTACTCCACATTGCAATATGAAATTA  
TTGCCAATGGAGTGAAGACGCCATATAACAAGGATCTCCGCTAGCACGGCATGCCTTCTTCTTAGAGTTCA  
TGATACTTTGTATATTCATCATTTTGAAGAGCTTATATGAACATTCATTAGATGCTCGTCGACAA  
ACGGCACATTTTGTATCTATGGGCTTGAATAGAATCTTTTAATAAAAGATTTTCTTTTCAGAAAGTGGGTT  
CTGATCCCAGGAATTCCTTGTGCTTCTCCTATTTGAGGTTGTTTCATGCATTTTCGATGATAGGGGAGGG  
CGGATGGTATAGAAAAGGGAAGGCTCTCTAGAATTTTAGAGAGCAGGATCTTTGTTTGATTCAAACA  
AAAGGATGAGCTTTTTTTTCATAAAAATTTCTTTACGCACGTCTAGTTTGAACAGGTCTTTAGCAGAG  
TACAATAAGACAGAATTATGTTCTAGGTGAGCTCGTAAGAAGACATGTTGTAAGGACAACCTCTATACTA  
GGATGGTAATCTTTATTTTAAATAATAAAAATACTCCTGAATTCAGATAAAAATAGCCTTGTTTTATTA  
AATCCATTTTGCTTTTAAACAAAATCAAGGTGAATCATGGTTTGTCCTTTACGAAATTGCTGCACCTTCTC  
ACACCAGCACGGAGAAATTTGCCTATGGAAGAGACTTCTCCTCTGTAGAAAGCAATAGTACAGGCTGTGCA  
AACATGCTTAAACCGTAGCTAAGCACACAGAGAACGCTAAGGTTATAAATAAACAAGGAAAAGATATCAT  
CAAAAGGATGCTGGAGACAATAAAAATAACTGTGTTGCTGTTGTCCAAAAGAAAAGCCGGTATCAG  
GATCGATTACTGCGCTCTCGCTCTGGATGCAGTACATATCCCTACGCGTGGTTTGTAGTTGTAGGTTA  
TGCGGTATATAGTTTCCAGGAGTACGTTGGGAAGCGATCTTGAAGGAGAGACTTTATCTCCTGGAGATAGA  
GCGCAACTAGATGCCTGTTTAGAGAGTGTCAAGTTAGGTTAGCTGGTTTGATGTTGAACTATTGGGACG  
GAGATTTTCCGGCTATGGAACATCGGGAGGGAGATTCTCGCCTAGAATGCAAGAAGATATAATCGCCAG  
GTTTCGAGACAAAAGTTGGGATCTGTGAGCTTACAGATGCGGTTGCTCTGAAACACTTCTGTGGGAGAACT  
TAAATGTGATACGCGACGTGAGAAAATAAGTCTTAGAGAAGGGCCTCTAAGACTTTTCTCAAGC  
TCTAAAACGCAATGCTAGGCAAGGGAACCTAGAACCCTGTAAGTGGTCCCAGATCCAGGGAGTAACATATGG  
CTTTGCCACGCAGCACACAAGACACAATTAACAGCGTCTGAAGTCTGTGTAGAGCTCTTTTGATTTCGTAA  
GCCGGAACATGTAGGCTCGTGAATCCAAGTTCGCCATAGGAGCATCCAGGAGACGGCATTTTGAGTAA  
CACTACAGGTCCCGATTCCACATCACGTTTCAGGCTTTGGATGTAGGCTCCTAGAAAGTAATAGTAGGTT

CGTGTTTTTTGGGATTTTTTTTCAAATGTTATTCCCTATAGGAAGTGAAATATTTTC TGAAGAGCTGGCAG  
AAAAGGACCGAATCTCTCCCGAACTCTCCTCAAAACCGTCCTGTGTTCCTGAAAATCCTTGCAGTTTAGA  
GAAAATAGAGAAGGAGCTGAACAGTCCGGAACCATTTGGATACAATAGGAATCGATGCGCACACTTCTCCG  
GATACTGCAACGCTATGCCAGGATCCGAATCCTTCTTTAGAGAAGGAGCGATATTTTGTTTTTAGCTCAT  
GGATACTTTCATTGTAGCATGCCTGTGCAGAGATTTTCATTAGAGAGGTAGCGAGTTGCGCTGTACAGT  
AGCTATATAGGAGGTCGTTTCTGTAGACGTAATAAAGGAATCGGACGATTTCCCGAGTAATTGTCTGCA  
GCCAAGCAGAAA GAATGGTCATCTAAACTGTGAGTACTGATACCGAATAGGTAGCCAAGGCTTCTATGAT  
GCCAATTATCGATAGGTTTCCAGAGCTGTGCTGAACATAGAAATAATTAGAAA CAGCAGATCCCCACGT  
TCCAAATAGATAGGCTCCTCCGTGCGCTGTTGTATTAATCATCGACTGCACAGCTTGCATATCGGAATAG  
GTGTTCCAAAGAGTGTTCCGAACGAGTGTAGATTGACGTTCTGGATGAGGCACATAGTTTTTAGGCGTCC  
AATTAGCAATCAGAGAATGCCCTTTCATCAGAATCTTTC CAAGAAA AAGTCCAATCTCCTTGATATCCAAA  
GTGAGAAGAGAGGTTCCCATCAGGAAGATGTAATGAGATTGCTCTTTAGGGAGAGTAAGGAGAGGAATA  
TTGTTTTGCTCTTTACTGAGAAGCTCTACATTTTCAATAAAAATTCTCATCTCCAGAGTTAGAGAGGAAGA  
TCTTTTGATAGAAA GATTAGGGGCGTGGATAGTTACGCTTTTTCAGTATCTAAGGAATGAAGGGGAAT  
ACTTAGCGTAGCTAACTTCAAAATCAGAGGAAGTTTAAAGAAGTTCCCGCTTCCATAATGAGGAGAGCT  
TGAGGATCCTGAGAGAGAGAAGGCGCGAAAAGGACAGCGCGATCTTTTAAACTAAGCGTCCCGA TTTCA  
GTTTCGATAGGCTGCTGTAGTTGGGAAGTGAGGTTATCAGGAGTTT TTTCTTCTTCA GAAAGACGTTTCGCT  
CGA GAAAATCACTGAACGGTTTG CACTTGTCTGAATAAC TAAAGGAGATGCGGTGGCTGGGGTGGGAGAA  
GTCACGCTGGCTTG CAAAGAGGAGGGAAGAGGCGATTCTTTGCTGCTAC TTTCTTGTACAATAGGATCAA  
AGAAAAGAATATCTCCGTTGCGAGCTTCTAAGGAA GAAA GAATCGCATCTTTCTCTAAGTAGATGGCGTT  
TC TTACTAGACCTTGGTCGGAGGTGCGTTGGGAGTTATTCTGGAACAGAACAGATCCTTACCTGCAAGG  
ATAGAGAGACTCCCTCCGACTGGATGGCGATAGCTCCACCTAT TTTAGCGCTGTTGTTAATGAAG GAAA  
CAGGACCGTTATAACGCAATACCATGTGCTTGGCA TAAATAGCCCCGCTTTTTC TTTAGCAGAATTGCT  
TG CAAA TAGCGTTTCTTGGTTACAAGCAAGAGAGAGAGAGCCTTTTTC TGAGGTG TTTAGATCGCTGATA  
CAACAAA TAGCGCCTCCATTTCGTGGCGGAGTTTTC CAGT GAAAAGAGAGGG TTTACATTCCCTGAA CAAA  
TAAGATTACTACAG CAAA TAGCGCCGCCATTTAAA TCCGCACGATTACGGGCGAAAGAAA TAGGCGACAC  
ATTTCTAGATAAAA GAGAAGGTTTG AGCCTGAATGCTCCGCCA TTTCTTTAGAAGAATTCTCTT CAAAA  
GCTGT GAAAAGATAGTTGTGCTGTAGAGAAAAGGCATCCGCAGAGATGGCTCCTCCAGAGCCTTCAGCAT  
GATTTTCGACAGAAA CTGATGCTACCATTATTGCGCAAGGATAACTGACCATTCTTTTGATGAATAATAGA  
AGGAGAGCTTTTCTTGAAGAGCAATCTGTGAAG GAAAGGAAGC GAAAGTTTGAATG GAAA GATCTCCT  
TTTTCTTTAAAAGAGCCTCTTTTG GGGTCCGTGATATGGAGTTTGA GATACGAACCAACAGTAGGAA TTTTC  
CAAGTACATACAAA GGATCGTCTTGTGATGCATGAGCA CAAA GAGCAG GAAA GAGGCTCTCCATGGTACA  
GTCCT CAAA AAATGTACAGACGACATGATTAGGATT TTTAGTGAGGAGGGCGG TTTACCTAAGGGATCC  
TGGC CAAAGAGGACCCTGTGGATGACAAAATAGCAGCACATAGACAACAGAAGTTTCATATGATCAGGTC  
GCATGGGATTCCCCCTAAGAGTCTAAAAGAAGAGGTTATGT CAAA AAAAAGTAATAA TTTACAGACTTTT  
TCCTCAAGGGCTCTGTTTCATGCTTTTCAAGATGAAGAGTTAAGGAAGATT TTTGGATTGT GAAA TTAGA  
AAAATCAGAATTAT CAAATTAGATAGTT TTTAAA AAAT TAAATAATCT TTTAAGAAA TCTTATA TTTATT  
ATCGATTTT TTTAAT TTTAATT TTTAAA AT TAAA ATAAGTT TTTA TTTTAGTT TTTGGGTTGG TTTGTTAT  
GAGCATCGGGGAGTAGGAGGCAACGGGAATAGTCGAATCCCTTCTCATAATGGGGATGGATCGAATCGC  
AGAAGT CAAA ATACGAAGGTAATAA TAAAGTTGAAGATCGAGTTCATTCTCTATATTCATCTCTTAGTA  
AC GAAA ATAGAGAATCTCCTTATCCAGTAGTAGACGTCAGCTCTATGATCGAGAGCACCCCAACGAGTGG  
AGAGACGCCAAGAGCTTCGCGTGGAGTGTT CAGTCG TTTCCAAA GAGG TTTAGGACGAGTAGCTGACAAA  
GTAAGACGAGCTGTT CAGTGTGCGTGGGTT CAGTCTCTACAAGAAGATCGTCTGCAACAAGAGCCGTAG  
AATCCGGATCAAGTAGTCTGACTGCTCGTGGTGCAAGTTCTGGGAGGGAGTATTCCTTTCAGCAGCTAG  
AGGGCTGCGTCTTATGTTACAGA TTTCTGGAGA ACTCGGGT TTTACGCCAGACCTCTCCTATGGATGTA  
GTT TTTGGGAATCTTGATGTGAACGAGGCTCG TTTGATGGCTGCTTACACAAGTGAGTGCGCGGATTATT  
TAGAAGCGCACGATTTTGGCTGGCCCTGACGGGGTAGCGGCCGCCGG GAAA ATTGCT CAAAGATGGGATAA  
AAGAGTTAGAGATCTACAAGATAAA GGTGCTGCA CAAA AATTAT TAAATGATCC TTTAGGCCGACGAACA  
CCTAATTATCAGAG CAAA AATCCAGGTGAGTATACTGTAGGGAATTCATGTTTACGATGGTCTCAGG  
TAGCGAATCTCCAGAACGTCGACACTGGTT TTTGCTGGACATGAGCAA TTTCTCAGACGTTGTATTATC  
CAGAGAGATT CAAA CAGGGCTTCGAGCACGAGCTAC TTTGGAAGAATCCATGCCGATGTTAGAGAA TTTA  
GAAGAGCGT TTTAGACG TTTGCAA GAAA CTTGTGATGCGGCTCGTACTGAGATAGAAGAATCGGGATGGA  
CTCGAGAGTCCGCATCAAGAATGGGAGGCGATGAGACGCAAGGACCTTCTAGAGCACAAACAGCT TTTCA

GAGC TTTGTAAA TGAATGTAATAGCATCGAGTTCTCA TTTGGGAGC TTTGGAGAGCATGTGCGAGTTCTC  
TGCGCTAGAGTATCACGAGGATTAGTTGCCGAGGAGAGGCGATTCCGCCGTTGCTTCTCTTGTG TAAAG  
GATCGACGCATCGCTACGCTCCTCGCGATGACCTATCTCCTGAAGGTGCATCGTTAGCAGAGAC TTTGGC  
TAGATTCGCAGATGATATGGGAATAGAGCAAGGTGCTGATGGAACCTACGATATTCCTTGGGTAGATGAT  
TGGAGAAGAGGGGTTCCCTAGTATTGAAGGAGAAGGATCTGACTCGATCTAT GAAA TCATGATGCCTATCT  
ATGAAGTTATGAATATGGATCTA GAAA CACGAAGATCT TTTG CCGTACAGCAAGGGCACTATCAGGACCC  
AAGAGCTTCAGATTATGACCTCCCACGTGCTAGCGACTATGA TTTG CCTAGAAGCCCATATCCTACTCCA  
CC TTTG CCTTCTAGATATCAGCTACAGAATATGGATGTAGAAGCAGGGTTCCGTGAGGCAG TTTA TGCTT  
CT TTTG TAGCAGGAATGTACAATTATGTAGTGACACAGCCGCAAGAGCGTATTCCCAATAGTCAGCAGGT  
GGAAGGGATTCTGCGTGATATGCTTACCAACGGGTCACAGACA TTTA GCAACCTGATGCAGCGTTGGGAT  
AGAGAAGTCGATAGGGAA TAAA CTGGTATCTACCATAGG TTTG TAT CAAAAAACTAAGCCACCAAGAAG  
AAA TTTCT TTTGGTGGGCTTCTTTT TTTATT CAAA AAA GAAA GCCCTCTTCAAGATTATACCAAGATGGG  
ATGTATAATCT GAAA GGAAGGCGT TTTA TTTCTATCCATATGATGGTGGTGGCATCCTCC TTTA GAGGA  
GCAGCAGTCTTCATGACGTTT TTTG AAGCAGCA TTTT CAGAAG TTTA GGCAGACCATAACCCAGCGATT  
CCCGTTACTACATAAGCTGCTTGTGTCCACATGGTTCCCTTACCAAGCAGGTGAGTAAGTAGG TTTA CCT  
TATACCCTGTTACTCC TAAA ATTCCAGTG TTTA TAGCTCCGAGAACAACAATAAGAGAAGATAATCCTCT  
ACAAA TTTACAAA GCATGACGTCCTCCAACGTAGATGTATACTTAACTCTGACT TTTA ATCTTT TTTA  
CAATTTAATAAAGTCTTTTT TTTG TTTCTCTAT TAAA GATGCGT TTTG CTGTGCG CAAA AGACGCTTCAGT  
AAGAGTGT TTTAGTG TAAAAAAGTACGAAGGAT TTTA TTTCTGTATAAGATCATGATTGACCATG TTTAG  
GATGGAAGATGACAGAGTCATATG TAAACAAA GAA GAAATCATCTC TTTAG CAAA GAATGCTGCATTGGA  
GTTGGAAGATGCCACGTGGAAGAGTTTCGTAACATCTATGAATGACGTCATTGC TTTA ATGCAGGAAGTA  
ATCGCGATAGATA TTTT CGGATATCATTTCTTGAAGCTACAGTGCA TCA TTTT GTTGGTCCAGAGGATCTTA  
GAGAAGACATGGTGACTTCGGAT TTTA CTCAAGAAGAAT TTTA TCTAACGTTCCCGTGTCTGTTGGGAGG  
ATTAGT CAAA GTCCCTACAGTTAT CAAA TAGGTGGAATCGCTATGTATCGTAAGAGTGC TTTA GAATTA  
GAGATGCTGTAGTGAACAGAGAGC TTTT CAGTTACAGCGATTACAGAATAT TTTA TCATCGTATA GAAA G  
TCATGACGAACAGATTGGAGCT TTTCTTTCTCTCTG TAAAGAGCGGGC TTTG CTTAGAGCTTCACGTATA  
GATGA CAAA CTAG CAAA AGGAGATCCAATAGGGTTACTAGCAGGAATCCCTATCGGAGT TAAAGATAATA  
TTCATATCACAGGAGT GAAA ACAACCTGTGCTTC GAAA ATGTTG GAAA ACTTCGTGGCTCCCTTTGATT  
CACGGTGGTGAGACGTATAGAGATGGAAGACGGGAT TTTA CTGGGTAAGTTGAACATGGATGAG TTTGCC  
ATGGGATCCACAACCTCGGTATTCCGCT TTTT CATCTACCAATAATCCTTGGGAT TTTA GAACGAGTTCCAG  
GGGTTCTTCAGGTGGATCCGCGGCAGCAG TTTT GCGGAGGTTCTGTCTATCGCGTTAGGATCGGATAC  
CGGAGATCGATTCTGCAACCAGCAGCAT TTTG TGGAGTTGTTGGA TTTAAA CCTTCCTATGGAGCAGTT  
TCTCGCTACGGATTAGTCGCT TTTG GATCCTC TTTA GATCAGATTGGACCATTGACAACGGTGGTAGAGG  
ATGTCGCTCTGGCAATGGATGCC TTTG CTGGTCTGATCC CAAA GATTCCACTACGAGAGACTTT TTTAA  
AGGGACGT TTTT CCAAGCCTTGTCATTGGAAGTTCC TAAGTTAATCGGAGTTCC TAGAGGATTCC TAGAC  
GGACTGCAAGAAGATTG TAAAGAAA ACT TTTT GAAGCTCTTGCTGTTATGGAACGTGAAGGCAGTCGCA  
TTATTGATGTAGATCTCAGTGT TTTG AAA CATGCGGTACCTG TTTA CTATATTGTTGCTTCTGCAGAAGC  
TGCCA CAAA CTAGCCCGT TTTG ATGGTGTTCGGTATGGTCATCGTTGTGCGCAGGCTGATAACATGCAT  
GAAA TGATGCGCGTTCTCGTAAA GAAGGC TTTG GAAA AGAAGTA ACTCGTAGAATTCT TTTA GGGAATT  
ATGTGC TTTT CAGCA GAAAGACAAA ACATCT TTTA TAA GAAA GGAATGGCAGTTCTGTGCTCGCTTAATAGA  
CGCT TTTT CAAGCTGCT TTTG AGCGCTGTGATGTGATCGCTATGCCTGTATGCGCAACGCCTGCCATCAGA  
GATCAGGATGT TTTG GATCCGG TTTT CTATATCTACAGGATA TTTA TACCGTAGCGG TAAA CTGGCCT  
ATTTA CCTGCCA TTTT CGTTCCTTCCGGACTGTC TAAA GAAGGTCTCCCATTAGGTGTTCAA TTTA TTGG  
GGAAA GAGGTTCCGGATCAGCAGA TTTG TCAAGTAGGATACAGCTTCCAGGAACACTCG CAAA TAAA CAA  
TTATATCC TAAA GCAGTGAATGGACT TTTT GACGGAGGAATAGAATAATATGGGCATAGCACATACTGAA  
TGGGAGTCTGTGATCGGTCTGGAAGTTACGTTGAATTGAATACCGAATC CAAA TTA TTTA GTCCCGCAC  
GTAATCAT TTTG GTGATGAACCAACACGAACA TTTT CTCTGTATGCACAGGGATGCCAGGATCTCTTCC  
GGTCTTGAATAAGGATGCTGTGCG TAAA GCTGT TTTG TTTCCGGCTGCGCTGTAGAGGGGGATGTGCG TTTA  
TTTA GCCGT TTTG ATA GAAA ATCCTATT TTTA TCTGACAGCCCAA GAACT TTTT CAGATCACCCAATACG  
AGCATCCTATCGTAAGAGGTGGATGTATTCGTGCTGTAGTAGAAGGAGAAGAGAAA ACC TTTG AGCTAGC  
GCAGACACATCTAGAAGATGATGCGGGGATGT TAAA ACAT TTTT GGGAT TTTG CTGGTGTAGACTATAAC  
AGAGCAGGGGTTCCGTTAATTGAGATTG TTTT CAAGCCTTGTATG TTTA GTGCAGAGGATGCTGTTGCAT  
ACGCCAATGCT TTTG GTATCCATCTCGGCTACATAGGTA TTTT CGATTGTAATATGGAAGAAGGTTCTAT



CCGTTTCGATGTGAATATTTCGTTCGCCCTCGAGGAAGTAGGGAGCTTAGAAA TAAGGTAGAGATCAAA  
AACATGAACCTCATTTACC TTTATGGCACAAGCTTTTGAAGCTGAAA AACGTCGTCAGATTGAAGAGTATC  
TTAGCCATCCCAATGAGGATC CAAA AAAAGTTGTTCTGCAGCGACTTATCGTTGGGATCCTGAAAAGAA  
AAAAACGGTTCTGATGCGTCTCAAGGAACGAGCCGAAGATTATATGTATTTTG TAGAGCCGGATCTTCCT  
GTTTTG CAGATCACCGAGACTTATATTTGATGAGGTGCGT CAAA CATTACCAGAGCTACCTCATAGTAAAT  
ATATGCGTTACATTACAGACTTTTGATATCGCTGAAGA TTTAGCAATGATTCTTGTGGTGATCGACATAC  
GGCTCATTTCTTTGAAA CAGCAACTATGTCTTGTAAAGAACTATCGTGCTCTTTC GAATTGGATCACAGTC  
GAA TTTG CGGGCCGTTGTAAAAGC TAAA GGAAGACGCTGCCATTCACGGGGATTCCTCCTGAATGGGTAG  
CGCAATTGGTGAACCTCATAGATCGTGGAGTGATCACAGG GAAA ATCGCT TAAAGAAA TTTGCAGATAGAAT  
GGTCTCTTCTTTTG GG GAAA GCCCAGAAGATAT TTTG CGTAGACATCCTTCGTTGTACCTATGACGGAC  
GACCATGCGCTACGCGTATCGT TAAA GAGGTGGTTGCT CAAA ATACCGCTCTGTAGCGGATTACAAGA  
ACGG GAAA GC TAAA GC TTTGGGCTTTTTGGTTGGACAGATCATGAAGCGAACAGAAGG GAAA GCCTCCTC  
TAAGCGAGTAAA CGAATTGCTATTAGCAGCTATGCGAGATATGTAA TTTGCAGCATCCT CAAAAAAGGCA  
TAAA AGAGAAGAACCCTCTTCATAAA ACTATGGAGAGGGTTCTCTTT TTTAAA AGGC TTTATCGCTTTTCC  
AATATTA TTTACGAGAGGG TTTCTCTTTT GAGATGAATCGGAAGAGGATTCCCTCATCCGAAGATTTCGCT  
GCTGCTTTGTC TTTG CTCTTGGTC TTTATTACGATGATGCTGAGCA TTTCTCTCGCTGCGAGAGAGCTTT  
ACGACGCGGCGTGTGCT TTTCCGGAGAAGAAGAGGG TTTGGATGGAGGGGTTATTCCTGAGACATCTCCTG  
CAGCTACGG TTTCC AAGAGCATCCATATATT CAGAAGAAGAGCTGCTGTCAGAAGAATTCGAGTCGGACAG  
TTC TTTATCGCTAT TTTGGTGGAGTGTGGAAGCTAGAAGAAGAGGAGGATTCCGGTATCTGAGCT TTTGAGGA  
CTGACAGAAGTTAGAATCTGCTCACTATCTGTAGAATGTGTGGTTGTAGAGGAGAAGAGTGCATCCGGTT  
GCATGG TTTG CAATGT TTTGTCGACCAACGGAATAGGTATATAGTTT TTTCTCTGATTGCCCGT TTTTCG  
CCAAGTCTTCCCTCT TTTTCAT CAAA CGAGGGGAATAGCGAACCTCTTCCAGAGCGGAGGATTTTG TTTCT  
TTAGGAAGATGGCTCTCCAGGCAGCTAACTCAACTTGTTCGAGCTTCTTCTGCTGT TTTCCATTGCTCGC  
GATTACTGAGATATTGATAGGTC ACTCTATGCAGAGACATCAGAG CAAA GCCGAGAGTCATAGAGCCCAT  
TAGGAATAGAGGATTTCGTAAGATTACAGCGCCTCCGCCTACGGCAATAGCAGAAA ACATCAATCCAGCA  
GCTGTCCCTGTTAGGA TAAAAGGAAGAGAGACTGCCGCAACGGTATCAGCAATCTCTTTACT TTTCTGGG  
ATTTCGCAAGATCTGAGACTAGCAGAGTGACTCCTAGGGCTCCAATAGCTAAGGCTGGAGCGATTG CAAA  
TAAGGCGAGCCAGACCCTTGTGTCCAGAGAATGATACTCACAATACAGAGAATACTAATAGCTATAAGA  
GCAATATCGTAAA CATAGCGTAG TTTGGGGTGACGATCGGGTGCCGTCAGAAA CCTGGATAAAAAGCCCTT  
TTA CCTGTTGGGGAGATTGGGGAGGGACTGGTGTACTGGAGTCA TAAAATTATCC CAAAAACAAA AAC  
GCTGAGTACTAGAATCTAGTATAAAA ATAAC CAAA GAGATTGGAGGGAGATAATT TTTATTTGGTCTG TAAA  
GAT TTTA ACTTACATAGATTCTAGCACTTCTTATTAAGCG GAAA AGCGTTGGGAAGGGGAGGCTGACTGG  
GTCGG CAAA GAGGGGCAGTTCAGATCGGGAGCAGAGGAGGAACGGGGAGCTTGGCAGCCGCTA TTTGGA  
TTTTAAGGGAAGAAC TTGG TTTATGTTT CAAA GCTGG GAAA AGGTGGGTGTAGAT TTTGGAAGCATGTCTC  
TACAGTAGC GAAA GCGATACTGACAGAGATCATAGG GAAAATAAA TCCTGGAGCCCAAGTGATACAACCT  
ACAATGCCCTACAATGGTAAGCGCTAAGGA GAAA AGGGACAGAAA GGTGCTAGAACATATCCGGAGCAAC  
CCT GAAA GCTTTTA TGGAATAGGCAGGAGATCAGACCCTGATAG GAAATA CAAA TAAGCCTGCAGCACA  
AAGCACAGG GAAA GTAATCAG TTTG AGTATACCAAGA GAAA TCCTGC TAAA GAGGCTATGGATAATGCT  
GCTTTA GGGTATT TTTGAGCTAGAGGGCTCATGTAGGCAGCGGCAACTC TTTCCAG GAAA AAC TAAATTTA  
AAAAGTGATCCTGTCTTTTATAGGTGCAACAGTGGAGGGCATT TTTCCA ACTAGGTGTTATGTATGGTA  
AGCCCGCATTGCGGGCA CAAAA TTTATATGCGAGAGATATTCTGACAAAAATCGA TAAATTTGATCTA  
TTTTATTTATAGTTAATCAGTTT GACTAGGATTTACTAGCGAA GAAAAGCTTCTAAATGATTTATTTGT  
ACAATCAGTTCTATCTCAAGAACTATGCCAGAAG TTTGCTAAA AAT TTTATTAAGCAGTATGATCTACC  
AGATCC TAAATA TTTGTTTGACAAGAGGAAGAACTCCCAATTCTAGGGAGATAAGCTGATTGTATGATGG  
AGTGGTATGCT TAAA GTTCTTTTC CACACGATGACGCT TTTCCGGGCA TTTGTTATCGACGCCTA TTTATA  
TCGTCGGAGATGCTTGTGG GAAA GATCGGGATGAGTACAAGAATCCCTCCTCTGAGAGCTTTTTC TTTTGA  
GAGCCAGTT TTTGCAAA TAGAGAACG CAAAATT CAAA ACTCTCCAGATCAATCCTTAGGATATCGACAG  
GCGGATACCTCGTTG TTTGCTACGATTTCCGTTACCGAGATGTCGGGA TTTCTTTTA TCGTCTCGTTATT  
TAGGAGCTGAAGTCTCTTG GAAA AGCTC TAAA GAGCTGCAAGATACAGATCCGCAAGCTGTAGGATA TTT  
CGCTTTCC AAGACAAA TCTTTTTA TCAGTATATCACATTGTCTGTAGGAGCCTACACACTAGCTCTTACG  
AATTGGCAGTGGTCTGTACTTT TTTCTGGTATGGTAGACCCT GAAA ATATTGAGATTGGCTCAGGACTCT  
ATCAGGTAGTTTA TCTT CAAA ATATCATGCTTC GAAA TCGTTATCTGTGATTATGGGAGTCATTAATGA  
GGTAGGGCTACATGATAAGCAAGCCTGGCC TTTA TTAGGGTCTCTTA TAAA CCTGAAGATAGACTCACA

CTCAATTGTATCTACCCGGTAAATTTTCTGCAGAATACCAGTGCACACCTGTTTGGCATTAGGAGTAG  
CATATCGCCTGACACGACTTCGTAAAAAATTCCCATAAAATTC TTTGGCTACCTCTGAAGGAATTTTTGA  
GTATTCAGGAAGA GAAATAGAAGGGAATATCAAGCTGATTTTTGGCCAGGACAAAACCTCAAAATGTTT  
GGAGGCTATTCCGTAGGGAATGATA TTTTCATTGGCAAATGCTCATAACGAAGACGAAAAGATCTACAAAT  
TCGGTCTTCGCTGTTCTTTGGAGCTTCTGCAAATTTGCATTTCTAACAAGGTAAGTTTGTCTATTGAT  
TGCCCGAACCAAGCACCTCATTGAATGT TTTGAAA TGTGTTTTA CAGACTTTTTC TAATACAACCTGTCC  
TTTGTATGAAGAATCTCTTTGGCTCGTTGCTTGACTTTCCAGAAAGCTCCTTTTAGAAGGCGGA TTTGG  
TATTGAGATTCTAGGGCGTGTATGGAAGAGA GAAAAGCTTCGCGAGCTAAGATGGAAGCTGCAGCTACCA  
CCACGTCTTGTCTGCACGATGACGCTGGATTAATCAATATCCGAGCGCTTCTTGCGAACAGCCTGTAG  
AAGACTCTCTCTGAAGAGGCGAATTGGTCTGAAA TAGCAAAGACTGCTCCTGCAGGATGAGGAGC CAAA  
TTATCGATAATAGTGGCGTGTGTCCAAGCCAGGAGGGAGTTTAAA TTCTGGAAA TTGGCATATAGTGCCT  
TATATT TTTCTGGGAACAAGGTAATGACTTTA CACGCA CAAA GCGAGCGAATGT TTTGGGC TAAAGAAAG  
GAT TTTAGCATCAGGAATGAGCTTAGAATCA CAAA TGCTGGT TTTATAAAGAGCTTCTATAGCTTGTGGG  
GAAGAAGCATATACTCCAGCAGTGCACAGAGGCC CAAA AAAATCTCCT TTTTC CAGATTCATCCACACCA  
TGCGAGAACGTAAATCCTGTTGTACGTTCTGTGAGGAGAACGTTTG TAGAATCTCTGGCTCAAG GAAAA  
TTCTA CAAAT TCTTGAGTTCC TTTA CCCTGTACTACAAT TTTCC CAGATTGATATACAGTGCAGCTAACG  
GTCGGAGATCTTCCCTT GAAATACAGTGTGGGGGGGATAGAGATGGTGAACCC TTTCT TTTTC TAGTTGTT  
CTCGAAGTATAGAAAA TAAAGAAGGAGACAGTTGC GAAACGAAA GAGGAGGGCATGATCACCTAA GAAAA  
AAGATTCTAAT TTTAAGAAAAGGAAGAGCTGTTACCGTAGATTCTTCTTCATATTCTATCATCCT GAAAT  
CTTTATGATC GAAAAAAT TTTCTGCGAAGAATAAAA ACCGTAAGTGTAACGCTTGA GAAAAAGTCTAGGAA  
ACTTTGATAC TAAAAAAGAGGAAA TCTAAGAGGCCTA TTTATTTTC AGTAACGACAGCCTCC TTTCTTTT  
TATGGGTAGAGAG CAAACCAGGGGAATTACATGAGCGAACATGTCCA CAAA GAGTTATTACATCTAGGGG  
AAGTT TTTTCGTTTCG CAAAGAGAA GAAAGAGCGCT TTTCTC TAAAAGATGTAGAAGCTGCCACATCTATTCCG  
TTTGTCTGCATTAGAGGCTATAGAAGCAGGACATCTCGG GAAATTA TTTTC TCCGT TTTATGCCCAAGGT  
TTTTAT GAAAAAATACGCAGCTTT TTTGGATATGGATGGGGATAGATTGCT GAAA GAGCATCCTTATGTAT  
TGAAAATT TTTTCAGGAAT TTTCTGATCAGAATATGGACATGCTGCTTGATTTA GAATCCATGGGAGGAAG  
AAAT TCTCCTGAGAAA GCGATCCGTAGTTGGT TAAA TCTAGGCTGGGCTGGAGTCTTCGTCGTAGGTGCA  
GCTTGTAT TTTGGTGGCTAGGGAATCTATTCAACCT TTTCTAGAACGGGTATCCACTCTTCGTAGTAECTT  
AT GAAAAC TTTGTATTAACGATTG TTTCTGTAGGAGAGAATCT TTTAGTTTCGTTACGCG TAAAGAT TTTTC  
CTCGATCCGGTTCT TTTGTAATGCAGGCGAGTCT TTTCTAGACAATCCGAATAAGTCCACAATGGCCGGGA  
AAAAG TTTGGAGCAGCTAACAGCTCTTCTTCTGAAG GAAAAATTG CAAAGAGTAGGGAG CAAA GCTATT  
TGCAAGAACTGTATCGGTAGCTCCTATAATTGCTAAG GAAAGAGAGGCGTCTGCA TAAA ACTCTC CAAAC  
TCTATTAAGAATCT TTTGAAGCGCTGTAGTGAAGTTCCC TTTACAATGATGAGAATGTGAC TAAA GGCCT  
AACGTCG TTTGAA TTTATGTTCGAGC TTTCT TTTTC CATCGTTTA TGAAGCCACAACCAGTGTTCAGG TTT  
GCATGTAATCCCT TTTCAAGAAA TCGCATGAGCCGATCCATCAACTGTTCTGTAGATTCCCCTATGGAT  
AGCTCTGTAT TTTGCATGGAATGCT TTTACTAGGGACGACCAGATAGTTCCCATTAGGT TTTCCG TAAA TAG  
CAACAGCAATAACTGTTTTTT TTTG TTTGTAGGCAAG CAAAGCAGGAGAGGTGGTAG TAAAAGCTTGGGA  
GCC GAAAAGAGGATAAGAATATTCCGAAGAAA GTAATACTTGATCCCCAACAAATGCCGACTACCTCTCCT  
CTGTGGAGAGCTCGTAGCGCTTGGTTAATTGCATCTGTGGAGGAACAAT TTTGCCTTG GAAA GATTCTC  
GCAGT GAAATGATTT TTTGATTGAGCCGACGATTCT TTTACAGG TTTGG CAAAAGCCAGCCCCGGATAGCG  
TTTAGTAATGTAAA GAAAAGGGAGCTCCCAGTTAGCTTGGTGACCACAGAATAAAA ATGGCTCCTTCTTGT  
CGATCTAAACGT GAAAAGAAATGGTCAAGTTCTTGTGTGAG GAAACTTCTCTG GAAAGAAA CCTTCAG  
GAGCATCTTCAGAAGTAGCAATAGCAATCA TTTCATCGATATG TTTGGCGAATTTATCTACAGTTGCAAG  
CTCTA CAAACGTAATGATCATCTGTTGTACGGATTGGCGTGCAA TTTGATAGCGTTCCGGC GAAA CTTTTT  
TCAGGGAAAGCT TAAAGC TAAATTAGTAAGAGCTGTT TTTCCGAAA TCAGAGAT GAAA TAGAAGAGAGCGG  
TTCCGAGCCC TTTGCTAAAAGTTCGTAAGGAGGATCGAGGAAGTAATCGTAAGATGGTCAGGACTCCAAG  
ACC TAAACCATAAA CGAGATGATCGACGAGAATT TTTCCCCCCGTACGTAATCT TTTAAAAGAGCATAGTA  
TGTGTTCCGTAAGGCTAGTATGAC TTTGCTAGTAGTTACAGAAA GAAGC TTTGTGATCGAGACAGGCTCT  
ACGTAAAAGCTTCT TTTATATAAAAACGCTG TTTTCAGTT GAAAAACGTCATCATAGCATCAGGAAGATTTT  
TTCTTTA GAGAGGATGACGCTACTTGAATAATCAC TTTATTTTC CTGACGTACGCGCCGTTAAGGC TAAAG  
GTTCCGCAT TTTGAT CAAATAGAGTAAGT TTTTCGTAAGTATTCTC TAAAGCGATGTGCAATACCTGCTTC  
GTCAAGGATCATATG TTTATTCGCTCT TTTGTTCTTGAGCCATAACTGCCTGAA CAAAAGTATTCTC TAAA  
GT TTTCTCGTCTA GAAATTTCTACAGCCCAATGAATGAAGTGTCTCGCTGAGAT TTTA CAGGAGGCTCCA

TAATAATAGTGAGCGCTATATTATTTTTTACAACATCTAGGAACAGATGGCTGACATCTTTTACATAAAG  
CGGTAGGTCCAATTGCTAGATCCCATGATTGAGTACTAGAGGAGCATTCTCTTCAAGATAGTAGTTTTGT  
GGGTTCACAAGTTGACTATTTTCTACAGGGAAAATAGAAGGACCGGAAGATTAATATTAAGAGGAAATA  
ATTCTTGTTTTAAAGAAAGAAGTCGCAAAAAATCTGCTTGC GGATCATTCAATCCATGTAGCTATTGTC  
GAAAAGGTATATAAACTTTTTCAGTCTTCAGGGACAAGGTATACTACTTTCATCAAGATTCCTTGAGCT  
AGACGATTGCGGTCCAGTTCTTCAAAAGAACTTTATTAAGGTAAAAGTTAATTCAAAACCATGATCTT  
TTAAAAGAAAGAAACGTATTCCTTAGGACCACTTACCTTTGTACTAAAATACTTAGGCCAGGTGTCTAGGTA  
TTCATATCCCTTAGGAGCTCTGCCATGGGTTTAGTGATAGTGACAGAAACATCTTCGGTAACAAAATTGG  
GTTAGACGAATGAAAATGTCTTCCGATGTGACGCTTTTAATATTTTACGTAAAATGGATGTCTGTGTCCA  
AGCATACTAAGTTGTAAGGATCGATGGTTTCTATCCAACTTTCAGTTCGTCCCTTGGCACTGATCACTAT  
CTCTAGATTGGAAGGGCGAAGCTTCTCAACAACAGAATTATTCCTGTAATCATCATGGCAACTTTTTC  
TTTAGCAGACCAATTTGCCTGCAATCCGATTACAGTCTGTTCCGGAGCTAGATCAATAACGCGTACAGGAA  
TATTATGAAAAGTTCTCGTTATCGTAATGGACTGATTTGCAAGCGCCAGATAATAATGGCAAAACCATA  
AGAAAAGAGTTTTGGAGCCAATTACGAGAAATCCAAGAGACGAAATTGATCATTTTTACGCATCCAGG  
AGATAATAGGGTTGTTTTCGTTTATTGCGGTTAGGATACTTCGCAGGATGGCTTTTAAATCTATCCAT  
CTTTACTCCACGAGTTAAAATTCATCACGAGCTAAGGAACTGCACCGGTCTCTCTGATACTACAATC  
ACGAGAGCATCGGTACGCTGACTAGCACCGAGTGCTGCACGATGACGCGTTCCCATGGATCGCGACAGTT  
GTGTGGTATCATGAGCAAGAGGAAGAATTACTCTAGCGTAAGAGATAGTCTCGCTCTCATTAACACGGC  
TCCATCATGTAGATGGGAGGAGGGCTCAAAAATAGCTTCGAGAAGTTCTTCTGAAAATCTGCATTAAT  
TTCACAGCAGAGAGATTAAGCAGATCATTCAAAAGACGCTCATTTCTAATACAATGAGAGCTCCGATTT  
GTCGTTACGCCATGCGATAGATGCATGCTGTCAAAATGGTCAATGAATTCGTCTGCATATTGATGACAAA  
TTTCCCTCTACGCAAGCGTATCCTAGAGAGAGCAAGGCGAATTTCTGGTTGGAAGATAATAAATACCACG  
ATAGCCGCAATATTCCTACATGAAGCATCAAAATGCGAATAACGGGGAGATGAAGTTTTCCTGCTAGAA  
CAAAATAGGCAAGAGAAAGACAACAAGCCAAAAGACGAGGTCCATGGCGCTGTTCCCAAGAAAACTTTAG  
CAAAATAATTAAGGACCACCAAAATTAAGCTATCTCCAACAGAGGTGTGGTGAATACGTTATACCTACG  
AACATCTATATAAGATAACCCTAGCAGTTGAAGTGTTTTCATTATTTTCAGCAAAACAAGAAGCTGTACC  
AACTCCTTGAACCTTATTACGGATGAACCGAAGTCAAGGAAGGTCTTAAGAAGGCCTTTGGGAAAGGACT  
CATCCCTAGTTTAGCTGGAAGACAGTTAATGGCAAGTATTTTGTGAAAAGGGCTGTTTAAACAACCTGG  
TGACAGGGAAACGTGCATAGTATATATACTAAAAGAATACTAGAAGTTTTTGATTTGGAGAGCCAAATA  
TGAGTGCTGAGATATTGGCGAGAGTACAGTTTGCCTGTTTATCGGATTTTCATTATCTGTTTGTCCCAT  
TAGTTTGGGATTAAGTATAATGATGTTCTTATGGAGGGGCTCTACTTATTCACAAAAAGATATTTAT  
AAGCAGTTGACCTGTTTGGATTAAAGATTTTCACCTTAACTTTGTTGTTGGCGTTGTGCACAGGATTGA  
TGCAGATTTTTCCTTCGGAGCAAAATGGTCTCGATTCGCAGAATACTGAAAACGTATTTTGAATGTT  
CCTTGGTAGCGAGGGAATGTTTGCCTTCTTAGAATCTGGAATTTCTAGGAGTTTGTATTGTTGTCGC  
TATAAAATGATCAAAAATAATGCACCTTTTTCAGCCTGTATGGTTGCGCTCGGCGCTCACATGAGTGCTT  
TTTGGATTGTTGTGCGAATCTTGGATGCAAAACGCTTCCGGTTATGAAATGGTTCATGCGTAATGGTAT  
GTTAGTTCCCCTAAATGACTTCTTTTGGGCGAGCGGTGTTGTCTCTCTGCTTTTGCAGCGTTTACACAT  
GTTGTTCTTGGCGCTTGGTTATCTGGGATATTTCTTGTCTTTCTGTTAGTGCTCACTATCTACGTAAAG  
AGCGGCATAAAGATTTTGCGAATCAGGGGTAAAATCAGCATGTTTGTGCTTTCTTGTTTTGGCTTT  
GCAGCTTTTGGTTCAGCAGATGTCACCTGCAAGAGGGGTCGTAAACACCAACCTGCCAAGCTTGCTGCGTT  
GAAGGTGTTTAAAGACTCAAGAACACACCCCAAATTTATTTACTCGGCATTGTAGATATGAAAAGAGC  
GAGTCATTGGGATCCCATTCTCTGGTTATCGCTTCTTGTTCACCAAAATGCAAAAACCTCTGTTAC  
AGGACTGGATCAGTTCCCATAAGACGAATGGCAAAATGTCGCTTTCTGTTTTCAAACGTATCACTTAATG  
GTCATGTTATGGGGAGTAATGGTACTTTTAGCTCTGATAGCCCTTGTGTGATAAGAAAAATCTTGA  
GCTGCAAGAAGGGGATCTTATGGATACTTTCCCTCTCTGTGCTATTTCTGAGTTATGTAATGAAATCGG  
CTGGAATTTCTACAGAGGTAGGGCGTCAACCTTGGGTTGTTATGCGTTATTAATAACATAAGATGCGACC  
TCTCCTATCGTGAACGCAGGGCAAAATTTGGCAGTCTTTGATTCTGTTTTCGATTATTTTATTTGTTTAT  
TAAGTGTCCTTGTCTCGCTTCTTTTGAAGAAGATAGGTGAGGGACCAGATGAGCAAGACCTTATAGAAGT  
AGATTTGTGAGGGCCTTCTTTATGAGGTTTTCTTTAGCAACGATCTTCTCTGTTGTTTGGTATGTTATTC  
TTTGCATCGCTGATTTGCTTATTCCTTAGGAGACGGATTTGATTTAGGATTGAGCACGATCTATTTCT  
TTCTAAAGATGAGAAAAGAACGTAGGCTACTCTTAAACTCAATAGGCCCGTATGGGATGGCAATGAAGTA  
TGGTTTGTTCATCATGTTGCTGGATTGTTTGCAGGGTTCCTGACCGCTTATGGAACCCTGCTTTCATCT  
TTTACATGCCTATTTGGACTATGGTCATGCTATACATATTCCGAGGCTGTTCTCTAGAGTTTCGTAGTAA

AGCAGAGTCTAACCGATGGAAGCTGTTCTGGGATGTTCTCTTTTC TATCTCAGGGATGTCTATTAGCTTT  
TTCCTGGGGACATTAGCTGGGAA TTTAATTAGTTGGA TTTCCGATCGCTCCAGATACTTCGTATAGTTCTT  
TATCTTG GAAA CTATT TTTCCGCCCTTATCAAGTATTATGTGGGTTA TTTGTAGTTGCTGCATTTGCTCT  
ACATGGGATTAGT TTTGCTTTAAT GAAA ACTACAGAAGGGCTGCACGAACG TTTGAAA AATAAA TTTCT  
TATGTTCTGTCTAGTTACTTGGT TTTGTATC TTTCC TTGCTCATTGCGACTAT TTTA GGGATGCCTCAGA  
CCCTAGGAGTGTGCTGTCGTATTGAAGGCGCTCCTGGTATGCCAGCGTATCCACTCATCATCTTATTATC  
GGTAGTAACGTTGCTTGCTGTTATGCA GAAA AGAGAGCGGTCTCTATTGG TAAA TACGG GAAA GCT TTT  
GTTCTCTCTTGATCAACTTGTGTTCTCCAATACTTGCGTATAACATATTGCTCTCCCTAA TTTA TTAG  
TATCTACGGTGGATAATCGTTATACTATGACCGTG TTTAACGCAGCCGCG GAAA CGCGAACCTTACAACA  
CCTAGTCACTATTGT TTTAATTGGGCTCCCG TTTGTCGTTGCTTACGCGATATACATATAACGGGTGTTT  
AGAGG CAAA ACAGAT TTTCCCTTCGA TTTACTAATTGCAGTAGGGTACAAGGCTCTT GAAA AGGAGCCTTG  
TATCTTGTG CAAA CAAA AGAGATGGGGATAGC GAAA AATCACAAT TTTCTTTG GAAA GT TAAA GAATA  
GTTGCAGCAGCTGCAGCTAGTTCCGAACGTTCCGTTCCGGTCA TAAA CATATGTCCATA CAAA GG TAAA  
GGT GAAA CTTTC TACTAGGTAGGTGAGACCATTGGAAT TTTTCAT CAAA ATATAGACTATCTA TTTGGGT  
AGGATCGCCGGTTAACACAATT TTTG TTCCT TTTCCGGCTCGAGAGATGATTGT TTTGATTTTCATGGGGT  
GTGAGGT TTTGCGCCTCGTCGATGATCATAAA TAC TTTAGGTAGAGAGCGTCTCCGATGTAAGTAAGCG  
CTTCCAT TTTGAGT TTT TTTGT TTTCCAT TAAA CTATG CAAA G TTTCT GAAA AGTCGCCCATATTATTCAC  
ATCGAA TAAA AATTCATGTTGTCATAGATCGGTTGCATCCAATGCATGAGCTTCGCTTCT TTTATACCA  
GGAA GAAA TCCAATGTCCTTCCCATAGGAATAATGGGTCTGCTAACTAAGAG TTTG TTATAT TTTAGGTT  
TCT CAAA CACTTGGTACATTGCTGCCGCTAAGGCCAGTATTGTC TTTCCGGATCCAGCTTGTCCCATCAA  
GGTCACAAG TTTA ATATCGTCTCTTAGTAGTAGATCTAGAGCGCATCGTTGTTCTATGTT CAAA GGCTTG  
ACACCC CAAA TTT TTTCTGGAGCAGGCTTGAGGGATAGGAT TTTG TTATCT TTTAGAGCTATAGCGACCAA  
CAGCGAATAGTTATCAGAGTCGCCA GAAA GAAA AAAGTATTCGTTAGGAGAAG TAAA GGAGATAGATC  
TGAAGGAAGGCGATAGAGCCATCCTTATAGAAA TATTC AATTGTGCTATTTCGCTACCT TTTAGT TTTCTA  
TGTCACGG TAAA GGGATCG GAAA GATACGCATTTAT TTTTCATAGTC TTTAGCTTCGATCCCTAGTGCTT  
CCGCATGGACTCGTCTGCCAAGACT TTTGGTTAC GAAA ACAACAGGCTCTCGTTGA GAAATGAT TTTGGAG  
TAGCTCTAGCGTGAGGTGTTTT TTTCTG TTTCTCGTGG TTTGAAA GATTGACTAGAGGAGAGACTTCAATA  
CATAACTCGCTGCCGTTTT TTTAATAAAA TTTGACCAGAGGAGGGTCTTTCCGACTGCTCTAGTAATAGAC  
GAATATTGCTCAATGCTCTGGAAGCATT TTTCCCTGATT CATCTC GAAACT TTTGCGCAGGATCCAATTC  
TTGATTACTG TAAA AGGGATAATGATGCGAGTGTAGAAA AAGAG GAAAGGGCCTTAGGATCG TAAATC  
AAAACGCTGGTATCAATAACAGAGTTTT TTTTCATTACA AATTCCT TAAATGACTCAAGTGTAAAGGGGAG  
ATAGTAC TTTGATTGTGTATCATATCCA GAAA AAT TAAA ACATGTC TTTGTTAGAGAGAAGTCGGGAGAG  
AGGGTT TTTTAGCAATCAACCTCCGCGTGTGCTAATCTG TTTGT CAAA AATGTACCCCTTAACTACAATGC  
CGAG GAAAGCGAGTCTTCTGTTGGAGGTTGTTAT GAAAGT CAAA ATTAATGATCAGTTCA TTTGTATTT  
C CCCATACAT TTTCTGCTCGATGGAATCAGATAGC TTTTCATAGAGTCTTGTGATGGAGGGACGGAAGGGGA  
TATTAC TTTGAAA CTCCA TTTAATTGATGGAGAGACAGTCTCTATACCTAATCTAGGACAAGCGATTGTT  
GATGAGGTGTTCCAAGAGCACTTGCTATA TTTAGAGTCCACAGCGCCTCA GAAA AACAAGGAAGAG GAAA  
AAATTAGCTCT TTTGTTAGGAGCTATTCAAC CAAA TGGC TAAA GGATGCGAAGTACAGGTTTT TTTCT CAAA  
GGGCTTGG TTTCTATGTTACTAGGAGGAGCTGGTTCGATTAATATGTTGTTGCAACATTCCTCCAGAACAT  
AAGGATCATCCTGATCTTCTTACC GATTTACTGGAGAGGATAGCG CAAATGATGCGTTCATTATCTATAG  
GACCAACTTCTAT TTTAGCTAAGCCAGAGCCTCATTGCAACTG TTTGCATTGT CAAA TTGGACGAGCTAC  
AGTGGAAGAAGAGGATGCCGGAGTATCGGATGAGGATCTCACT TTTCGTTTCATGGGATATCTCT CAAAGT  
GGA GAAA AGATGTACACTGTTACAGATCCTCTGAATCCAGAAGAGCAG TTTAATGTGTATTTA GGAACGC  
CGATTGGATGCACATGTGGGCAGCCATACTGTGAACACGT GAAA GCTGTTCT TTTA TACTTAAGAATAGTC  
CAAA GAAGACTGGCGT TTTCCAGAG TAAA AGATCGAACAGTCGCGGTTGACT TTTTC TTTAAGTCAATAA  
TAATCCCTCTCTAGAGGATGAGTCTTCTAGAGCTGTGAATGCCCTCATTGGAGGCTCAGAT TTTAGCGAA  
TTGCAGGAGTT TTTGCGTGCGAACGTTGTCTA TTTCTATGCTCAT TTTGCCC TTTCTTGTGGGGCAGAT  
GCCTGCTTATGTGCTGCGGATC TTTCCAAA G CAAA AGTTGAGGCTTCTGTGCGGTGATAGAGCGGC TTTCT  
CTCCG TTTACAGGAGAGAT CAAA G GAAA TCGTGTGCG TTTACG TTTG GCTCCGCATACGGATAGT TTTAT  
CAT TAAA GAGTTATC TAAA GGTGACTGTCTAGCTGTTCTAGGAGAGAG CAAA GACTACTACGTAGTAGCT  
GCTCCTGAAGGAGTTCGTGGTTATGTA TTTCCGAAC TTTGTTCTCGATAATGTGATTGAAGGGGAGAAGG  
TTAATGTTCCGTTAGAGCCTTCGACTTCTGCTCCTATCTTAGCAAGATTGTC TAAA GGAAC TGTG TAAA  
GAC TTTGGGCGCAGCTCAGGGTAAAGTGATA GAAA TTGCTCTTCCAAGCAATGTGTT TTTA TGTGCG

AAGAATTTTGTGAAGAATGTTGGGGCTTTGGACCTATAACAATCAAAAGAAAGGGCAAAAATAATTAGCTT  
TAGATCTATTGAGTCCGCTATGGATTTTGCAGATGCTGAGTTGCAAAAAAGATAGAGGATATTGATTT  
AGACGCCATTTATAAGAAAATGAATCTTGCAGCTGCTGAAGAAATTTAAGGATGTTCCAGGTTTACAATCG  
TTGGTACAAAAGCCTTAGAGAGGGTTCAAGAAGCTTTCTCTAGCAAAATCCTTGGAGAAGAGTGCTGTGA  
AAGTCCCAGAGATCCAGCATAAAAGTTTGAAGAGATCGCTGTAGTTCTCCAGCTGTTGAGGAAACCC  
AGTTGTGACAAAATAGAAGAACAAAAGGTTACAACGGTTCCTGTTCCCTGCTCCAGCTGTTGTTACAGAG  
CTGGCTCAAGATTTAAGCTCTGTCAAGGTTCTTTATTATCGCATTATATCCGTAAAAAAGGTTTCGTTA  
AGGCTCTCCTGTTATAGAAGGAAGAGAGAGTTTGAAGCTTCTTTATTTGCTGTTGGTAAGTCTTCA  
GCCCCAAGAGATTCGGCATCAGCTCACTATGGAATCTTTTATAGAGATGAACAGAAGAAGAAAAGAGTG  
CTGACCGGAGAACTCGAAGTGTATCCTCACATCGTTAAAAATAATCCTGGCGATTATCTCTTAAAAATG  
GTGAAGACGTAGTGGCTTTGTCTATGCTACTAGTATCGATTTGAGTAAATGGTTAGGAAAACCTGTAGT  
TTTAGAGTGTGTCTCTAGACCAATAATCATTTGCTTTCCCGCCTATATTGTTTGTCAGTAAAGAA  
GGGGCATAAGCAAGTTCAATAGGAGTCTTGTACTTAGGTAACAAGACTCTTCTTCTTTTTCTTTT  
CTAAGAGCTACGCGGGTTTCTGATAATGTCTCTTCCGGGATTCTGATTGAGGAGAGTCTGGCAATTGA  
ATAGAGGCATCCTGTTCTGGAAGTAGAGAGGGGCAAAAAGTTCATGAAAAAAGCTTTAACAGCCCGGA  
AGATTTTATAGAATAAGGGATCCAAGGCAAACTAAAAGCTTTGATTCCAAAGACTTCTTGCATCGCTTTTGT  
GTGCACCTGTGGCCATTCTTTCTAATGATAGAGCAGGGGAACCTTATTGCAAGGAATGTTCCGGTCAATTT  
TGACAGAGGAATCCTCCTGTTTCGTGTAACAAAGCTTGATGTAATTTGCGCATGTTATAACAAGTGCGAA  
TCCCTACAACCTGTGCTCAGAATGGGCACATAGCTGCAAAAAGATGTCAGCGCATTACGACGAAGATAGTT  
GTGTTGTAAGCAATCCCATGCCGGAAGCTATCCGCATTATGGGCATGCTGCATGAAAAAAAAGGTATTA  
GAAAAAACGTACACGAAGAATACTCCCTAAAAAAGATAAAGCTTCTAGCTTTTGAAGCGGGGAGAAGTAC  
AGAGGCAAAAATGCGGACGTAAGAAGAAAATCACTGAAAGCCAGAGAGACATTCCTAACAGAATCGGGGA  
AAAATTTCAATAAAAACGGCCTCTCCTTCTGTATGCCTCTTGGGGAACCTCGGTGACTCGTTATTTGGG  
AGGACACGAAAATCCAAGATTCCCCACTAGGCAAAACAGAAGAAAGAAACCTATGGAGGTGGAGAGAGTC  
GAACTCTCGTCTTAGTAAACTCCCCGCTAACCTCTACATGCTTAGTTCTTAGGTACTATACGTTATGTC  
TCCCTCAGCTAGAAAACCCCTATAGAGACTAACGACTCTCATTAAATTTCAAACTCAATTTCTCGAGAATTA  
AAGGACCCAAGTTCTAACCAGATACATGACGGTGTTTCGAAAACCTCTGGTGGAGCTCGCGAACACCGGG  
TCACCCGATTTTAGGTAACAACTTTGCTAATTAAGCAGCTACTCTTAGATCTTCGAGATCAGCGAAGCTG  
ATAATTTTCGCATTCAGCCTTAGGTTCCGGCATTATTTGTTGTTGTCGGCTTTTTGGAGGCCAGCCAACGCC  
CTCCGCATGCAATTAACGCTTCAATTTCTAAGTCAAGAACTTTACACCCCCAGAGCTGAGGATTGTAAGGA  
TTCTGAGTCTTTTCGCAATATTTTGATGAGAAAATCAATGTAACCTGTTTCATTAAGCGGATTGTGGTC  
GAGGCAGAGGGAAATGAAAGAGAGGGGATTACAGGCGATTATATGGGTTGGCCTAGGAGTAAAGAGTGG  
TTCCCTCAATTTATTTGTGCTCTCTTCCGCTCGCTCGATAAGCATATTTTAATTAACGGTTTAAAAGCGAA  
TCGATCATAATCCGTTAGTTAAGAAATACCTGTTTAGGAAAGCAGTTAAACTGCAAACTTTGTAAGCAGA  
TCGATCAAACTTTGAAAGCATCAAAACCCATAAGTGAATAATCAAAAGATGGATAACGAAGATAAGATT  
AGTATTTCCGCCAAGAGGAAAAGATTCTATCTTTTGGAAAAGAGCAAGATATTTTTCAAAAACCTTTAG  
ACAATCGAGAGGGCTGCCCACTTTTCTTTTATGACGGGCTCCATTTGCTACAGGCTTACCGCATT  
TGGCCACCTGTTAGCAGGTACAAATAAGATGTTGTATGTCGTTATGCGTCGATGGATGGGCATTATGTG  
CCTCGGCGTTTTGGCTGGGATTGTCATGGGGTGCCAGTCGAATACGAAGTAGAGAAATCTTTAGGTTCTTA  
CCGAGCCAGGAGCTATTGAGCGTTTCGGTGTGGCGAATTTAACGAAGAATGTCGCAAGATTGTTTTCGG  
ATACGCGGATGAATGAAATATTTGTGGATAGGATCGGCCGATGGGTAGATTTTCTGCAACATGGAGG  
ACTATGGACCTATCTTTCATGGAGAGTGTCTGGTGGGTATTCCGCTCTCTCTATGATCAAGGACTTGTGT  
ATGAGGGGACCAAAAGTGGTTCCTTTTCTACCAAGCTAGGTACCCCTATCCAAATTTTCGAAGCTGGCCA  
AAATTATAAGGAAGTAGACGACCCCTTCTGTGCTGTAATAATTTGCTTTGCAAGACAATCAAGGCTTTCTTT  
CTAGCATGGACCACAACCTTTGGACTCTTGTTTTCAATATGGCGCTAGCTGTGCATCCTGAGCTCACCT  
ATGTCCGATTAAGAGCAAAAGATCAGGAGACGAATATATCCTGGGACAGGAAAGTTTGCCTCGTTGGTT  
CCCAGATCGAGAATCTTATGAATGGATAGGACAATGTCTGCAAGAGTCTTGTGGACAAAAGTTACGAA  
CCGCTTTTCCTTAATTTCAAGATAAAAGGAGTTAGGGGCTTTTCGTATTCTTCCCTGCAGATTTTATTG  
AGGAAAGTGAGGGGACGGGTATTGTTTCATATGGCACCAGCTTTTGGAGAAGCTGACTTTTGTGCTGCCA  
GGAACATAACGTACCTCTAGTGTGCCCTGTTGATAATCAGGGGTGTTATACCGCTGAGGTGAAGGATTTT  
GTCGGCGAATATATTAAGTCTGCTGACAAAGGCATCGCTCGTCGATTGAAGAAGCAAAAATAAACTGTTCT  
ATCAAGGTACAGTTTCGTCACCGCTATCCGTTTGTGGAGAAGTACTCTCCCTTAATTTACAAAAGCAGT  
GAATTCCTGGTTGCTGCTGTAAGAAAGGTAAGAGTAAGATGTAAAGCCAATGAATCCATTCATTGG

ACTCCTGGGCATATCAAAACAAGGACGCTTTTGTAAGTGGTTAGAGGGAGCTCGTGACTGGGCTATCAGTA  
GAAATCGTTATTGGGGACTCCTATACCTATTTGCGGTAGTGACGATGGAGAGCTTTTGGTCATAGGATC  
TATCCAGGAAGTGGAGGCATTATCTGGACAGAAGATTGTAGAATTGCGCCACTTTATTGATGAGATA  
GAAATTAACCAGAACGGGAAATCTTTCCGAAGAATCCCTTATGTTTTCGATTGTTGGTTTGATTCTGGAG  
CTATGCCATATGCTCAGAATCATTACCCTTTTGAAAGAGCAGAAAGAAACGGAGGCTTGCTTCCCAGCTGA  
CTTTATTGCTGAAGGACTAGATCAGACTCGAGGTTGGTTCTATACGTTAACCGTTATTGCTGCAGCTTTA  
TTCGATCAGCCCGCTTTTAAAATGTAATTGTAAAATGGGATTATTCTTGCAGGAAAGACGGAAATAAAATGT  
CGAAGCGGTTGAATAATTATCCTAGTCCAAAATGATTATGGACGCGTATGGAGCAGATGCTTTGCGGCT  
GTAATTGTTGAATAGCGTGGTCTGTAAAAGCTGAAGATCTTCGCTTTTCGATAAAAAGGGTAGAGTCTGTG  
CTTAAGCAAGTTCTATTGCCGTTGTCTAATGCTTTTGGCTTTTCTATAAGACTTATGCGGAATTGTATGGTT  
TTGATCCAAAAGAAAAGACAAATATAGAAGTTGCTGAAATAGACCGCTGGATTCTTTCTTCTATACAG  
TTTGTAGGGAAAACCTCGAAGAAAGTATGTCGCAATATGATTTACATGCTGCTGTAAAATCTTTTGTGGAT  
TTCATTGAAGATTTAATACTAAGTATATTTCGTAGGTCGCGGCGACGTTTTTGGGATGCCGAGGATTCTA  
CAGATCGACGGGCAGCATTCTCTACACTTTATGAAGTGTGGTAGTCTTTTCTAAAGTCATTGCGCCATT  
CATTCTTTTATTTCAGAAGATATGTACCAGCAATTACGAGGAGAAACGGATCCCGAGTCTGTGCACCTTA  
TGTGATTTTCTCACGTTGTCTTAGAAAAGATTCTTCTAAATTTGGAAAGGAAAATGCAGGATATTCGAG  
AGATTGTAGCTCTAGGGCATTCTTTGCGTAAGGAGCAAAAATGAAAGTACGTCAACCTCTTCAAAACGT  
GTATATTGTAGGAAGCCAGGAGAGAATGGAGGCTTTAGCTCAAGTTGGATCCTTGATTGGAGAAGAGCTT  
AATGTGAAAGACGTACATTTTTGTTCAGAAAATCCGGAGTATGTAACCACCTTTGATTAAGCCTAAATTTCC  
GAACCTTAGGGAAGAAGGTAGGTAATCGTCTTCCAAGAAATCAAAAGAGCTCTAGCAGGATTGCCCTCAAGA  
GCAAAATTCAGGCTTTATGACAAAAGGCAGATGGTTGTTTCTTAGGAGAAGAGACCATTTCTTTAGAT  
AAAAGAGGACATTACAGTTTCTTGGGCATCGGCTGAAGGATTTGTAGCGAGAAGCTCAGCTTCTTTGTAG  
CAGTACTGGATTGTCAGTTAACAGAGCCTTTAATTATGGAAGGTATAGCCAGAGAGTTGGTTAATAAGAT  
CAACACTATGCGAAAGAAATGGGAAAATACACGTTTCTGATCGCATTGCTATACGTTTACATGCCCTGTT  
ATCGTTCAGGAAGCGTTTCGTTTACAAGAGATATAATTTGTGAAGAGACATTAACCACCTCCGTTTCTG  
TGATCGATTATAAAAGAGGGGAAGAGTGGGATATTAACGGTCACGAGTGTCTTCTGTTCTGGAGCGAGT  
TGAGCGTTGAGATCACTATCATTGAGCAAAAAAGAGGTCTTATTAAGATCTCTTTTTTTTTGCTCTTA  
AGGGAATAGCCTATGGTTTTTTTCGATAGTACCATAATCCTATGCAGTAAAGAAAAGCTCCTAGAGCCAAT  
CCATTTACGAGGTAGCCAGGTAAAATCAAGGGCGTTATATTGGAAGATAACAATCCTAGACGATTAATAG  
GCCAGAAGATCCCAACAGGAGATCCAAAAGATTTTCAACGGGAAACAAAACAAAATCACGGCTATCAGC  
GCTCATAGGACAATTATCTCCTAAGACAAGCACGTCGGCCTTCCGGAATTTTAAGACCAAAATTAGTAATA  
AAGGAAACAAAATTCCTCTGTAGATCTGGAGGAGACCTCTGTCAAATAATGCGATGTAAGGTTTGTCTT  
CAGATGATTGAAGTCTTTTCTCTTCAGACACAATGAATTTCTGTAAAGGCAGGATCGCTATCAAATAAA  
AACTGGAGAATCCATAACGAACAGGTTCCCTTGATTGAAAATGCATAGCGATTAGGGAACGGAGCATAT  
TGAGGGTTTTAGGAATATAGATCGTGTGGAAAATAATGCCGCAATTAATAAGTCAATGACCTGAGAAT  
TGCTTAATTGCGTTAAAAGGATGCGGCTGTTTGAGTTTGTTCGAAAGCCACCCATATTGATTTTAAACAC  
GTCTCCTTTAGAAAATTCATAACATCCGTCAGGAATAATTGGCATAGGTAGGGCAAAATCCTGACCATG  
CCTGAGGTATTCATGGGAGCAGGTTGGTACTTGTAAAGCATATCCATCTACAACCTGTAAAACGGGATGTTG  
TGAGGTTATTACGAATCAAAATGAATATGTTCCCTTCTTAAAGGAAGCAAGGTTTCATAGGTTTCGATAGT  
AGGAATAAGCTGTGTTTCAAATGGACGTAAGTGAGGTTGAGGATAGGAAACATTAGGAGTGTGGGCAATT  
TCTAGGTAGGTGTCCGAAAGAGGAGAGGGAAGGACATGAGTAAGAGCAGCTTGTTTTTTGGTAAGGATGC  
GAACCATTGCAAAATTTTTTATTCCGAATAGATCGGCATAGCTAACAGGCTCATTATGAGGATCTTTTAA  
AGCATAGGGAGTATCATTATGCCAAGCATTCTTATAGAAAATTTGTCATAAGAAGCCTGTTGAGGGAGA  
GAAATCTTTCCACAAGGTGTGTGAAATTTGGTTAAAATGATCACATCTGTTTGTCTTCTGAATGGGTAAGAA  
TTTCTGGAGTTCCGTTCAAAAGAAAATATAGGGGACGTGGTAGAGATTCTCTGTATTTTGGGGGAAGATGGG  
CTCTCCGTCGCAATCGATCCCATAAATTTTCCCTCCAATAAAAATATACGGTATCTCCAGGTTTACCATG  
CACCGTTTATATAGCGTTTTTTTCCAGGGATGATTCAAAATACTTAGTGTGCGCATTAGGGATAGGAA  
GATCTCCAACAGTGAAGACTACCAGTTCTCCTCGAGTGATAGCCTCAGGTGTATAGCCAATACTTCTGTT  
ACTAAAAGGTAGCCGGAGTCCAAAATGTTGTTTTGGAAAACAAGAATACGATCTTGTTCAGAATAGTAGGC  
CGCATAGATCCTGTAGGAATTCATATAGCTCAAAACCAAGACTGGCGGATTAAGAAAAGCAAGAATGGCAG  
CAAAAGTCAAAAGCATAGATAAGATCAAAAGTAGCTCGGAGTTTGGATTTAGGGGAATCTTTTTTTGTATGGC  
TTGAGCTTGCTTAGCAAAAGGGGAAGCATCTTCCCTATTCTGATCCAAAATAGCCTCTTCAAGCTGTTTC  
AAGACTTCTGTAGTTCTTTTGTAGTTTCCGGATGAGAGAGCATTTTTGTGCTTTTCAGCAATCTAAAGG

AAGAATGAAGAATGCGACGACTCTTATTCAGGGAATATAAGCGACTCATGTAACGCTCGTCATTAGATT  
TAACAGTATTTATGTTAGGAGAGACCTCTCTTCACTACTTTTCATTGTGAAAAAAATTTAGATTTTTTTAG  
GGCAGGATCTACTTAATTCATATGGAGGTCTTTAAGCCAAGGTCATCTTACA TAAAAGCTTTTTCGGC  
ACTACATTGAAACCGTTTTCGATGAAAGTATGAAGATGGCTAGAAATTGGGAAGAGCTGGATAGGATGAG  
GCGGCTTGGTGCCCAATTTCAATGGTCTTAATAATCACTGTCCCTGTAGGAGTCTCAACTAGTCCATA  
GAGGAAACGCTAAAACGTTTCAATTGTTAGAAAAATATATGAGAATATTTT TTTCTGATAGAGGAGAAGAATC  
TTTTGGCCAAAACAGAAATCCAAGCACTGGAAGGAAGGTTATGAGTTCTCCATTCAAAGATGTTTCGCGGA  
GACCAGGGGGTGCCTTCTTTCCCTTTGTATTTAATTAAGTGAGAGGGGGCTGGAGATAAAGGGGAGTCGAA  
GGATTTTACAAAGAAAGGCAAAAGGATCTTTTTC TGAGAGAGGCATCCATTGCGCATTTTTGAGAACAA  
AATCATAAGAGGATTTTGGAAAATTCGTAACAAGTACACTTTT TTTGAAGATTGGAGTTGATGGAAGGCA  
TTCTTCCAGGAAGACTGTTCTACTAATTTTTTTTTC TTGCTGTGTTAGGGAGGCAAAATTCAGACACTTCGA  
CCCAAGTCGCTTCTGAAGAATTTTGGCAAT TAAAAAGAAAATTTTGGAGATCCTCGGCTTAAGACGGC  
ATAGTCTCCGGGGCGGGCAGTTAGAATTTTTC TTGGATTGATGATTGGAGAGGAGAATGGGCTTCAGCC  
GAGGGATAGGATATGAAAATGCCAA GAAAAAAATAAAAC TTTAAGAAGGTTTGGAGGTTGCATTTT  
CTTGCTTTTTCATAAAATGTTCCGGGTATGCTCTCCCTTCTGTTATGTGAGATTTTCACATACTAAGATAG  
TGATTTTGGGGTGTCAAATGAAA AAAACACTCATCCTGAGTATAGACAAGTTCTGTTTG TAGATTTCTT  
CCACTGGGTATAAGTTTGTGTTGTGGGTCTACCTATCAGACAGATAAAAACAGAGGTTTTTGAAGGACAAGA  
ATACCCTGTATGCTACGTCAGCATTTTCCTCGTCTTCGCATCCATTCTTACAGGAAGCAAGAAGCTTGTG  
GATGCTGAGGGTTCGAGTTGATAAGTTCTT GAAACGATACAGTGGCATTAAAGCAGTCTGCTCCTAAGCCTG  
AAACCGTTGTGGAAGATGTTCTTCCCAAGGGTAAAGAA GAAATCTCCTGCTAAGAA GAAAAATAATTTTGA  
GCAGAAC TTTCTGTTATCTAGAGAAAAGCGGGGCGAACACCCCGCTTTT TTTGT TTTAATAAGTCTCTCT  
TTTTGAATCTGACTTTTCAGAGTAAAGTCTAGTGTCCCAAATTTGATTGCCAATGTACACTCTGGTC  
TTTTGTTAGAGAGATGCTAGAGTAAAGGCAGAAGAAGTCTGTTTCATG GAAATAAAAGTTTTAGAGTGTTTAA  
AGCGCCTTGAAGAAGTTGAAAAGCAGATATCCGATCCGAATATCTTTAGTAATCC TAAAGAATATAGTTC  
GCTGAGCAAGGAGCATGCGCGTCTTTCTGAGAT TAAAATGCTCATGAGTCATTGGTTGCGCAAAAGAAA  
ATTTCTCAGGACGATAAACTCGCTTTATCAACAGAGAAGGATCCA GAAATAGTAGCTATGCTAGAAGAAG  
GAGTCTTGTAGGGGAAGAGGCTGTAGAACGCTATCGAAGCAGTTAGAAAACCTGCTTATTCCACCTGA  
TCCAGATGATGATCTCAGTGTGATTATGGAGTTGCGAGCAGGAACGGGAGGAGATGAAGCGGCTCTTTT  
GTAGGGGACTGTGTGCGCATGTATCACC TTTATGTCAGCAAGTAAGGGGTGGCAATGCGAAGTTCTCTCTG  
CATCGGAGTCAGATCTCGGAGGCTA CAAAGAATATGTTATGGGGA TTTCTGGGGCTTCTGTGAAACGTTT  
CTTGCAGTATGAAGCAGGAACACATCGTGTG CAAA GGGTCCCAGAAA CAGAGACTCAGGGTAGGGTACAT  
ACGCTGCGGTAACGGTAGCTGTCTTCCAGAACCAGCAGAAGATGACGAAGAAGTTTTCATTGATGAGA  
AGGATTTACGTATTGATACCTTCCGTTCTTCTGGAGCCGAGGCCACGTCACGTTACAGATTCCGC  
TGTGCGTATTACTCATATTTCTTCTGGCGTTGTGCTTACGTGCCAAGATGAACGCAGTCAGCA TAAAAAT  
AAAGCTAAGGCTATGCGCGTGC TAAAAGCTCGTATTCGCGATGCAGAAGTGCAGAAGCGCGCGCAAGAAG  
CCTCTGCTATGCGTCTGCTCAGGTAGGAAGCGGAGATCGTTCCGGAGCGAATTCGAACCTATAAT TTTCC  
TCAAACCGTGTGACCGATCACC GAATTTGGCTTAAC TTTATATAACTTAGATCGTGTAAATGGAAGGGGAG  
TTGGATATGATTACGACAGCTCTTGTAAACCACGTACATCGGCAGCTATTCCGGTCATGAA GAAACTGCTT  
AGAGAAGCTTCAGAGTATTTGTTGTC TCGAGGGATTCGGTTTCCTCAAAGGGAAGCCGAAGATATCTTGA  
TGGA TTTGTTAGAGATTTCTTCTAGAAGCGCTCTCCATCAGGCGAAGTTATCGAGCGAAGAG CAAAGTCT  
TTATTGGAAGCGTCTGCGGAAGCGAGGGGATCGTTGTCTACGGCATAACATCCACGG TAAAGTGCATTTTC  
TTAGGGGTTGAGTTGCAAGTAACCCCTCAAGTTCTAATTCCTAGGCAAGAAAACA GAAATTTTTGTAGAGC  
AGATCATTGGTTATCTGCAGATGCACAAGGAGAAGACAACATTTTATGATGTTGCTGTGGGAGCGGGTG  
TATTGGTTTGGCAGTGAGGAAGCACTGTCCGCATGTACGTGTTACGCTATCAGATATCAGTCTGAAGCT  
TTGCCATTGCAGAGTCCAATGCTAGAAGCAATGCGCTTGCAGTAGACTTTCTTTTAGGGGATTTTGTG  
ATCC TTTCTCTTTCTGTCAGATGTGCTTGTGTTAACCCTCCTTACCTATCCTATAAAGAGTTT TTTGA  
ATCAGATCCTGAGGTACGGTGTGATGAACCTTGAAAACGTTAGTTGGAGGCGTTTC TGGGTTAGAATTT  
TATCATCGTATAGCTACTCATATTCATAAAATTTTAGTCTCTGGAGGCGTTGGCTGGCTAGAGATTGGCT  
CAACACAAGGAGAGGATGTAAAGCAAATTTTTTCATGCCAAGGGAATCCGAGGACGCGTGTGAAA GATTA  
TGCGCAATTTGGATAGGTTTTTTTTCCTT GAAAATCAAGCTAATGATGCTGTATCCTCTGGGGAGGTTTCT  
GGCTTTTCGAGAGATGATTAGTTC TTTATCGCAA AATTATCTAATATTTTC TCCTCACTTTTTACCGC  
AAAAGAGGGTGACAGAGGAGGGTATTTCCGACTCCATTAGAGAGGTTGCTTAGCTCTTCTAGATGCCGAT  
GTGAATTATCAGGCGGTGAAGGATTTTATTGCTAAAAGTGAAGCA GAAAGTTGTTGGGGAAGAAGTTTGA

AAATGTCCTCTCCTGGGCAACAGTTTATCAAGTGTTGTCATGAAGAGCTTTCATCTTCTCTTGCTTCAGAGCAGACTGCTGTTTCGTTACGGGGATGCCAGCTGTTATTTTACTCTGCGGGTTACAGGGAGCGGGGAAACGACTACTTGTGCTAAGCTTGCTGACTATTTTCCTCGAGAAAAGAAGGCAAAGAAAGTGCTGGTAGCCTCCTGTGATTTTGAAACGTTTTCGGCTGTAGAACAGTTGGAAGGTTTAGTAAAACAAACGGGAGCAGATTTTTCGAAGGGAAGGAAATGATCCTGTGGACATGGCGGCGGAGGCGGTTCAGCATGC AAAAGCCAAGGATATGATTTTAGTCTTGTGGATACCGCTGGACGGCTTCATGTGGATGATGCGTTGATGGATGAGTTAGTAGCTATTGCTCGTGTAAACGAGCCCGTGC AAAACCTTGTTCGTTATGAACTTAGCGATGGGACAAGATGCGGTGTTACTG CAAAAGCTTTTGACGAGCGCTTAGGCTTAACAGGTGTGGTTGTGTCTATGGCAGACGGTGATGCTCGAGCTGGAGCGGTGTTGTCTGTGAAGTCTTGTCTTAATAAGCCAAT TAAATTTGAAGGGTGTGGAGAGAAGA TAAAAGATCTACGTCCTTTTAAACGCACAGTCGATGGCAGAACGTATTCTTGAATGGGAGATACGATCAGTCTAGTGACAAGATGCGAGAGTGTATCTCTGAAGAAGAGAA TAAAAGAGTTAGAA GAAAAGTTAACA AAAAGCAACGTTCACTTATGAGGATTTTCATAAGCAGATACTTGT TTTTCGTCGTTTAGGGCC TTTGCGTAAGATCATGAATATGATGCCAAGT TTTGGTGGTG CAAAACCTAGCGATAAGGATTTTGAAGAATCCGA GAAACAAATGAAA GAAATGAAGCGATTATTCTGTCTATGACTCCAGAGGAAC GAAAGGAGTTAGTGAA TTGAGTATGAGCCGGATGAAAAGAATCGCTGCGGGCTGTGGATTGACGCTAGGTGATGTCAATCAGTTCCGTAAG CAAATGATGCAATCTAAGAAGTTT TTTAAGGGAATGACCCGAGAGAAAATGGAACAGATGGGTAA AAAAAATGTCGAGGGAATCTGTGGCGT TAAAAATTCG TTTAAGACAACAAGGACGTAAGAACCATGTTGTATATAGATTAGTACTAGCTGATGTGGAGTCTCCTAGAGATGG TAAAATATATTGAGCTGTTGGGATGGTACGATCCTCATAGCGAGCAGAATTATCAGCTGAAAAGCGAACGGATTT TTTATTGGTTGAATCAAGGAGCTGAGCTTACAGAGAAGGCTGGGG TTTAGT GAAAACAAGGAGCTCCTGGGG TTTATGCTGAACTAATGGCTA AAAAAGTTGCTCGTAGAGCAGTCGTTAGACAAA AAAGACGAGCTTATCGTCAGCGTCTTGGCTGCAAGAAA GGCTGAAGCAGCTGCTAAGTAGATAAGGACATAAGGAATGGAGATAGATATTCTCTC TTTATTCCCGGACTAT TTTGCTAGTCC TTTACAGGCGACTAT TTTAGCCGAGCAAT TAAACAGGGAGC TTTATCTGTTCGCTCCCGAGATATTCGAGAGTTTCGGCTTAGG GAAATGGAAGCAGGTAGATGACTCTCCCTATAATGGAGAGGGGATGCT TTTGATGGCAGAGCCTGTGGTACAGGCTATTAGAAGCATAAGAAGAAA GAAGTCCAAGTTCATACTTATCTCCGACGGACAACCTC TTTTCG CAAAGAAAAGTCTGAACTGGCGTCTGTTCGCA TTTGGTATTGTTATGTGGACACTATGAGGGAATTGAT GAAA GGGCGTTGACTGCCGAAGTGGATGAGGAGATAAGTATTGGTGATTACGTTCTCACCAATGGGTGCGCGGCGG TTTAGTTCTCGTAGATGCTCTTGGCTCGCTTCATTCGGGAAT TTTAGGGAACCAAGAAAAGTGCAGAGTACGACTCTCTT GAAAATGGATTGTTAGAAGGTCCTCAGTACACTCGTCCACGGGTT TTTGAGGGTGAGTCGGTCCCTGAAGTGTGCT TTTGTGGAGACCATCA GAAGATTGCGGATTGGA GAAAACAGGTTAGTCTAGAGAGAAGTACGAGAACGTCGACCAGATCTGTATCTGCAGTATT TTTATGGTAACAGTGCTTG TTTAAGTACTCAAGAGGATCTCCCTAGGATAGAGGTAG TTTCTCCAAAACCT TTTCTGTAGT TTTAGAAGTTCAAGATCTTC GAAAAGCTAAGAAGTCTATTCCAGGATGTTTGAAAAGAGTGTTGGGACGGAGATAAAATTATTCCT TTTAGGGAAGACGAG TTTGTACCTGCAACAGACA AAAGAAA CAAGAGGCCCGACCACAGTATTTATAGAGCTGGAGACTGATCATGAT TTTGTTTCGTT TTTAAACCGATGG GAAATGCTCGGAGGAGAGCTTGGTGAACAAGGGACGGGAGGG TTTCTTTAAGACAGGTTT TGA TTTAGATGGCCATA TTTGGGTGTCTCTTGTGTACAGAAATAGAAAAGAATTT TTAGGT GAAATAC AATGGGGAAC TTAATCAAGGAATTGCAAGACGAGCAGTGCAGAACTGATCTCGCTGAT TTTCTGTGTGGTGACACGATTCGTGTGGCTA CAAACA TTTTCAGAAGGAGGCAAGGAGCGGGTTCAGGTATTCCAAGGAACAGTCATGGCCCG TAAA GCGGTGGTGCAGGAGAAA CAG TTTCTCTTCATAGAGTTGCTTACGGTGAAGGGATGGAGAAGAGCTTTCTACTGAATAGCCCTAAGATCGTAAGTATTGAAGTTG TAAAACGCG GAAAAGTATCGCGTGACGCCTCT TTTATTTGAGAG GAAAAACTGGTAAGGCTGC TAAAGTTAAA GAGCTTATCGGTTCTCGGGCTGCTAAGAAA TAG TAAAGAAA AGAGAGCGGCATTAAGCCC TTTCTGCTGTTCTCAACGTCAAGAGATTGCC TTTATAT GAAA TCGACCGTTGAGCAGGCGATGCT TTTG GAA GAAAAAAGCATT TTTGAGAATCAAGCTATTGAGCAAGGGTACTCACAAGTTGCCGGTGTAGACGAGGCTGGGAGAGGGCCTCTTGCAGGCCCTGTTGTTGCTGGAGCTTGTATCTTACCTAGAGG GAAA GT TTTCTTAGGTATTGATGATAGCAA GAAA TTAAC TCC TAAACAAA GACGGTATCTGTACGAACTGTTGCTTGAAGATCCTGAAGTCGACTGCGGGGTGCGCGTTATTTCTGTGTTGAGCGAATAGATGAGATCAATAT TTTG GAGGCTACCAAGGAGGCTATGGTTCAAGCCATAGCTTC TTTGCGAAGCACTCCCATT TTTATTGGTTGACGGGTTGTT TTTGCCTCA TAAAATTCTCTCTTAAGATTA TAAAAGGGGATGCTCGTCCGTATCGATAGCCGACGCTTCTATCATAGCGAAGGAATATCGTGACGAGTTGATGCGGAAGCTTCATGTAGAGTACCCGAGTACGGT TTTGATAAGCATAAGGGGTATGGGACAGCAGCTCATTTA CAAGCTC TAAAACA TTTCCGGCCCTTGTGTATATCATAGAAA AAG TTTCTCTCCTGT GAAA GAGAGTATTCAAGAGGGAGTATGTGAGTAAA GGTATTTC CCCCT TTTCTCAAGACGGGGTTCAAT



GC**TTTC**CCAAGCTT**TTTAT**CATTAGCGCTCCTGCTGGAGCAGGGAAGACAACA**CTCACCCATATGCTACA**  
AAGAGAG**TTTC**CTGATGCAT**TTTG**AGAAGACGGTGTCTCAACGACACGTTCCGGCTCGTCCAGGCGAAGTG  
CATGGCGTGGATTA**TTTGTTTG**TATCTGAAGATGAC**TTTA**AGCAATC**TTTAG**ATAGGGAAGATTT**TTTGG**  
AATGGGTCTT**TTTATTTG**GGACTTATTACGGAACGAGTAAGGCGGAGAT**TTTC**TAGAGTTCTG**CAAA**AGGG  
TAAGCACTGCATAGCCGTGATTGATGTACAAGGAGC**TTTG**GCTCTGAAGAAG**CAAA**TGCCGGCAGTCACT  
ATT**TTTA**TTCAAGCTCCCTCTCAAGAAGA**ACTTGAGCGCCGTTTG**AATGCTCGGGATTCAGAG**GAAA**GATT  
**TC**CAGAA**GAAAGAAA**GATTAGAGCATAGCGCTGTC**GAAA**ATTGCTGCCGCTAGCGAA**TTTG**ATTATGTTGT  
GGTTAATGATGAT**TTTG**ATTACAGCATATCAAGT**TTTA**AGAAGTAT**TTTAT**AGCTGAAGAACATAGGATG  
AGTCATGGCTAG**GAAA**AGATCG**TTTA**ACTAAT**GAAA**GACTGAATAAGCTAT**TTTG**ATAGCCCC**TTTAGTTTG**  
GTTAATTACGTAATTAAGCAAGCTAAGAA**CAAA**ATTGCTAGAGGAGATGTT**CGTTCTTCTA**ACGTCGCGA  
TTGAGGCGCTGAACTTCTGGATC**TTTA**TGGCATT**CAGTCCGAATACGCTGAAA**GAGATGATCGAGAGAG  
ACA**TTTG**TCTGCTACAGGAGAGAGACGAAGAGAACAAG**TTTC**GGAACATCCAGAA**GAAA**AGATCCTTCT  
CTGTACA**ACTGGAGCGACGTGAAA**TAGTGGAACTTCCCGTAT**CTTATTACTTCTGCGTTGCC**TTACGC  
**AAA**TGGTCC**TTTG**CAT**TTTG**GACATATTACCGGTGCTTA**TTTG**CCTGCAGATG**TTTA**TGCGCGT**TTTC**CAG  
AGACTACAAGG**CAAA**GAGGT**TTTG**TATA**TTTG**TGGTTCTGATGAATACGGAATCGCAATTACCC**TTAATG**  
CAGAGTTGGCAGGCATGGGGTATCAAGAATATGTCGACATGTATCATAAGCTTCA**TAAA**GATACCTTCA  
**GAAA**TTGGGAAT**TTTC**TGTAGAT**TTCT****TTTC**CAGAACTACGAACGCTTATCATCCTGCTATTGTGCAAGAT  
**TTCT**TATC**GAAA**CTTGCAGGAACCGGACTGGTAGAGAATCAGGTGACCGAACAGCTGTATTCTGAGGAAG  
AAGGGAAGTT**TTTA**GCGGACCGTTATGTTGTAGGTACTTGTCCCAAGTGTGGG**TTTG**ATCGAGCTCGAGG  
AGATGAGTGT**CAGCAGTGC**GGTGC**GATTACGAAGCTAGAGATCTGAAA**GAGCCTCGTTC**TAAA**TTAACG  
GGGCAGC**TTTATC****TTTAC**GTGATACGGAACATGCTTACTTGCAT**TTTG**GAGCGCAT**GAAA**GAAGA**TTTGC**  
TTGC**TTTC**GTGCAAGGT**TTTA**TCTACGCTCTCATATGCGTAA**TTTC**GTTACGGATTACATCGAGC**TTT**  
**ACG**TCTCGAGCAGTACTCGAGA**TTTGT**CTTGGGAATACCCGTTCC**TGATTTTG**GAAAATAAGGTATTC  
TATGTGTGGTTCGATGCTCCAATTGGTTACATAAGTGGAACTATGGATTGGGCAGCATCGATTGGAGACC  
CTGAAGCTTGGAGAAGT**TTTG**GTTGGACGATACTGTGACCTACGCACAG**TTTA**TAGG**TAAA**GATAATAC  
TTC**TTTC**CATGCGGTTAT**TTTC**CCTGCTATG**GAAA**TAGGACAATCTCTTCCCTATA**GAAA**GTGGATGCT  
CTTGTAACATCAGAAT**TTTAT**TGTTAGAAGG**TTTC**CAGTTCAG**TAAA**TCGGATGGGAAT**TTTA**TAGACA  
TGGATGCGT**TTT**TAGAA**CGTATTCC**TGGAT**TAAA**CTGCGTTATGTTGGCAGCGATTGCTCCAGAGAC  
TTCGGATAGCGAAT**TCTC****TTTC**CAAGAGTTCAAGACCGCATGCAAT**TCTGAGCTTGTAGGGAAGTATGGA**  
**AA****TTT**TGTAATCGAGT**TCTAGCTTTTG**CTGTTAAGAATGGATGCACAGAGC**TTTC**TTCTCCTCAATTAG  
AG**CAAA**AGGAT**TTTG**GAT**TTTAT**TCT**CAAA**ATCT**CAAA**A**ACTTGCTAAGGATGCAGCCGAACATTACGCACA**  
ATACAG**TTTGC**GTAAAGCGTGTCCACGATTATGGAATTAGCTGC**TTTAGGGAATGGCTATTTCA**ATGAT  
GAAGCTCCATG**GAAA**TTGGC**TAAA**GAGGGTAACTGGAATCGGGTACGCGCTATTCTATTCTGTGCTTGT  
ACTGCCAGAAGTTGCTAGCTCTCA**TTTC**CTATCCTATTATGCCT**GAAA**CAGCATTGAAGAT**TTTG**GAAAT  
GATAGCTCCATAT**TCTTAGATCTAGGTTCCCAAGATCCAGATAGATTACACTCTC****TTTG**GACAGATTCC  
TTTT**TTG**ATTACTCGGAAGAGAA**TTTCT**CT**GAAA**GAGCCTGAATTATTGTT**CACAATGGTAGAGT**GAT  
TCTCCACGGTAATCTTACGGAGAG**GAAAGAGGGGTTTC**AT**TTTA**TAGAACCCTCTTTTT**TTTG**TG**CAAAA**  
AGCAATCCGCTCGGAATACATCACTGCAACTAATATTAGATAGCTTCT**TAAA**TATATA**CCGAGGGGATTA**  
TCC**TAGAGACGGTCTACA**AA**TAGTGTAA**GGAGA**GAAA**AGAGGAGTGG**TTTG**T**TAA**GAAGGGAGTGCATA  
GCTTGTG**CAGCCCGTACATCGGTGTTGA**ACCTTATCATTACGAACAGCAATAGCAACTGC**TTTC**TTG  
TTCTAC**TAAA**ATGACTAGTTT**TTTC**CCTCGTGAATTGCTGTATAGAGTAAG**TTTC**TATACAGCATCAC  
GTAATGAGAGGTGTGAATAGGAAGAATAATACAGGAGGTCTCACTTCC**TGGTA****TTTG**TGTATGGAAGTA  
GCATAAGCTGGTATCAGGTCATTGAGTCTGCTTGCGAATAACTAATATAGCGCCATCCACG**CAAA**CGA  
T**CAAA**CTC**TTTG**TAGATAGGTCAATAGAGGTCACATAACCGATATCTCCGTTGAATACCTC**TTTAT**TATA  
GTTATTACGCG**TTTG**CATAACGCGATCTCCCGTAGAGAAGGAGT**GAAATTTCC**TTGGAT**TAAA**CAG**TTTA**  
TTAGGATTAAGTGTGCT**TTTAA**CTCTAT**TTTA**GATTGAGTAT**TCTAATACCCCTTTTC**TCATAGGAG  
CAAGGACTTGAATATC**TTTGGTAAA**GATAC**CAAA**TT**TTTAGGAA****CAAA**ATCC**GAAA**CGAGATGAATGAT  
GTG**TTTA**ATCGCTTCTCAGGGTCTTCT**TTTG**AAA**AAATAAAA**AGTCTTT**TTTC**CCTGAAGAGCTGTTG  
AGAACC**GGAA**ATTCTCCTGG**TTTAC****TTTAT**GGGCAT**TTTG**TAATGATATT**CGAATTTTG**CAACTGACGGA  
AGAT**TTTC**GTTAGGTAGGTTACCTCGATGTGATGG**GAAA**GAATAAGATC**TTTA**AGGACATTACCAGGGCC  
TACGCTGGGAAGCTGGTGCACATCTCCAATTAGAA**TAGGATAGCATGATCAGG**CAGTGCAGCTA**GAAA**  
CGTTGTAAGAGAATGGTGTGATCAT**TCCAGATTCATCGACAATAACA**AGATCACAATCAATAGGATCTT  
CGTGATTC**TTTCG**AAATGACAAGGT**TTTG**AAATCATACTGGAGAAGAGAGTGGATAG**TTTG**AGTACG**TTT**

CCCTGTGATTTCTGTCATACGTTTCGCAGCTTTTCCTGTAGGTGCTGCTAGGATTATTTCTTAGGGGAG  
GAGATCTTTTCAAA GATA GAAA GGATAGCACGTGTAATTGACTTTTCTGTTCCTGGTCCCCAGATA  
TAATATGAATCTTTTG TGAAGAGCTGGCATGAAGAGCTTCTTTTG TTTTCTTCCAATTTTAAATCCAG  
AAGATTTTCAACCTCCAGAATCGTTCCTGGGTATTGATAGATCGTATTCTGTTTGAAGAAAACAAGAGT  
CTTCGAATATCAATCGCAATTTGTGTTTCAGCTA GAAA AAGTTGGCGCGAC CAAATATAGGTATCTTGTT  
CGAGTTCCTTGACATAGACTGTCTTCGGCGTGACAA GAAATGGA TTTGGGTACGGA TTTCTCT TTTCCG  
TATGATCTCCTCTGGAGCTTCTTCATCAACAGTT TTTCTACGAGAACAATAAAATCATTAAGAGGGTAG  
CAGGTATGCCCTTCTTCTTGAAGTTCATCTAGAGAGTATTGAATCCAGCAACGATACGATTAGGGGAAT  
TTAGAGGGACTCCTAAGCACGTAGCAATAAGATCAGCGGT TTTAAACCTTATACCGTACATTTCC TTTGC  
AAGCAGAAA GGGATCTTGACAGACCTTCTCGATCG TTTGATTTTG GTATTT TTTATACAGCCGTAAACCA  
TAATGAATGGCTATTCCATGTGCTGTGTA GAAA TAA CAAAGCATGACGTAGGTCTC TTTGCTCTTGAGTT  
GCTTAGAAA AATCTTCGCAGCGGGCAGGAGAAA TCCCATCTACTTCTACCAATTTAGAAAGGACAGGAATC  
GAGTACTGTTAACGTGTCTTCCCCGAAGGTTGAGACAATTT TTTGAGCAAG TTTGGGCCTACGCCCTTG  
A TTTGAGCATT CAGGTAAGCTATGATTCGGGAATCAGGACTATAGGTTGCAGCGGAGG TAAAGC GAAACA  
CTAATGCTCCGCTAGCATCTACACTCCAATGACCTGTTAAGTCTACAGAGGAGCCGAT TTTGAA CAAAGA  
GAGCGGGAGATGGCCA CAAACAGTTACTAGTGAATTT TTTGTAAGGGACTCGTAGGAAGGCGTACCCTGTT  
TGATCGGACAGGGGATCTTCTGGCAGGATCAGCTC CAAAATACCG GAAAGTTTC TCTTCAACCCATAT  
CTTT TTTAACTCTCTTGGAAGTATTCGATT TTTAGAAA GGCTTAAGTTCGGTTCGGACAGCATTATAGATT  
CTAATAAGGCTCCGATCGGTATTT TTTATATTTAACCACA AAAAGAAGTCCATG GAAAATGAAAC TTTT  
TCAGAAATGTT TTTAGAGGATTTAAA GCGATTTGGTAGGC AAAAAGCAACC TTTAAAATACAAA CAGAATC  
GCTTTAAA GAGGAT TTTGAAAATCGGTAT TAAAATTTAATTTG CTTCGGATTCCGTGGTTATAAGAGTTT  
CTGAAGGAGTTTCTTGTTCACTGGCTTT TTTCTGAGCTAGAAGGAGACAGAGACTAGCTCCTAACATCAG  
AAAGAACCCTAAA CTTCTTGAAA GATGGCATTTC TCGTTTACATAGGTAAGAAA GAATCCATC CAAAG  
ATGGGTT CAAA GATAAGAAGAGCCCC TAAAAGAGCTGTAGACAGATGAAGAGAAGC TTTGTTCCAAGCTG  
CGATAGCTCGGAAGAG GAAAAAATCCCATAGCAGAG CAAA GAACGATGAATAGGCATCTTTTCG GAAAG  
AGGGGTAT GAAA TAGAAA ATTACGAGTGACATGGGTAATACC GAAAGTATCTCCTAAGATAAATTAATGGG  
AGACAGATGATGAGAGAGCTGATCCC TAGCATATGGCACCATGTGTGCGGGGAGA TTTT CAGAATGTTGCT  
CGAGAAA GTCATGGTTATAGATGATGTATCCAGCC CAAATGCTAGTTCGCTGCTGTGACACATCCGAATCC  
TAAGAGGTAGAGAGGCAGAGAAGAAC TGGATTCCGATTGGAATTCGAGACATTTCGACAGAATGATTCCA  
ACTACAATGATGCCACTCATACT TAAAAGAAA TGAGTAAGAGAGCATCTTTTTC TTAATATTGGAATAGA  
AGAGAATGGCAATAGGGGCTAACCCAGCAATGATCACAGTCACTGCAGATCCTGAATAACGTACAGCTTG  
TGCGATACC GAAA TAATAGGCTATGTTAATAAGAAA GGCCACAGGATGCCTTT TTTTCAGAG GAAA AAG  
GAACTGT TTTGAAGATATTAGAACG TTTATACAGAATAGTGATCAGCGAACAGATTTCC GAAAACGGAGT  
AGCGGGTCAGCACAAATATCTAGGTCAG CAAAGTTCCCTAGCATACTAGGGATCAC GAAA ACCATTTCCCA  
GTAGAAGCAGGCTAGGAGGCTATAGAAGACTCC CAAA GGTGTATTACGAGAAGAGGACATTGGATGAGGG  
GAGGACATCATGCT TAAAAGGCTCTCCAGCT TAAA AACTGCGCTCTAA GAAATTAC TAAAA TAAA GGACT  
TACGAGAAC GAAA GTCAGG TAAA GA CAAA AAGAGTTGG TAAAAAAGCCTCTCTTT TTTCTCCTCTTCGT  
TTGAGGGAGCTTTAGCCC GAAA GGACCATTACAGGGCAATTATATTTCCCATAAA GATTTTTCGTAAA CAG  
TACCAAGAAGGGCTA TTTACTGT TTTGAG TAAA GAT TTTAAACTAT TTTTCATAAA TGG TTTGAAGTTCCCT  
TATAGAATCAGAGTTGATAAAGCGTTTTTT TTTGGTATAATGAGAAA AAGCTTTTGT TAAGG CAAA GAGAT  
GAAGCGTATCTTAGTGTATTTCGGA TAAAGGAG TTTCTCCTTACTA TTTGCGCCATACTGTTTCGCTGGTTG  
AAGCAGGTAGCTGCTCCATTCCAGATGGAGGTATGTGCGGTGAATGGACGTTTC TTTGATTTCATGAGCCTC  
TTTG GGAAGAAA CAACCAGCTTCTTGTAAATCCAGGAGGTGCTGATGTACCTTATCATAATGTGTTGCA  
TGGACTGGGGACAGCGCGTATCGATAACTACGTAAGAGAGGGAGGCTGTTACCTAGGTA TTTGCGCAGGA  
GCTTAT TTTGGTTGCGCGCGG TTTGAA TTTCTAGAGCCTACAGGATC TTTATTTG TTTGCTAAGCGAGATT  
TAGGTTTTTTCCCGGGAGCTGCTAATGGTCCTGCTTAT GAAA GCGCCTTTTC TTATAACAAGTTCCCTCTGG  
AGT TTTAGCCGCTCCACTAGT TTTCTGCTGAT TTTCTGAGAGAG TTTCTCTCTTT TTTAATGGGGGATGC  
TG TTTTCGAAAATGCGGAACATTTCC CCGAAAATATGCATCGAGGCGCGCTATAATAATCTTCTTG GAAAAC  
CTGCAGCTATTCTCTCCAGACGCCCTCGATAAGGGGCTAGTCGTGC TTTCTGGTCCCTCATATAGAGTACCT  
CCCAGAGT TTTGCTCCTTGCAAGAAGATAATGTTATTCAGGCGAGAGAG CAAA TTGCAGCACATTCCTCG  
AGTCTAGAGGAGTACAAGCAGTTCTTAATCCATCGTCTATTGAGTAATGTGCTCGAGCACGT TTTGTATT  
AAAATGCTCTCACCTC TTTGAGGATGTGCTTCTCAGCAT CAAA TAAGAACGGTTGCACTTGTCTTAGTA  
GACCCAA TTTATCTTCTCTTCTAATCCA GAAA TAATAATGGTGGTTAGTGCTGTCTCGCTAACAGGTCG

TACAGGAGATAGGATACGCATATTCGATACATTACCGGGAAGCGTGTAGTGTTCCTTTTCATGAATACA  
GTAAAGAAATCTTCATAATCCAACGGGAATATGGGAGCGAGTTTC TTAGTTCTCCAATCCGCAACTTTTG  
TATAACGCAACTGTTCTAAAGCGCAGAATAGTGCTAGCAACTCTAGAGTGCCTGCTTTTGGTGTGTGCAG  
AGGAGTTTGTAGGGGTTCTAGCAA TAAATCTCATTAGATAGGTTGTGTTCTATGATCTGTGCATAGTGA  
CTAAAGAGTTTTTTTAAAGAGCTCTTCTTGTGAGCTGCTTGC TTTCCTGAATA GAAATGAAGAAGGTTT  
CATTTCCTGTATCATAATGTTGTTGTAGAACTCCTTC TTGGCTTCGCGCATAACAGGATTGCCGGAAGG  
TAATTTGGTGTGCATAACCCACTCGACAGGTGAGAGCATTGGACTTGATGAGATAGGTATGTAGCGTTTCA  
AAATCCAGAGTGGATAGTGTGAGGGA GAAAGG CAAACTGGAGTGCACAGGATAATGGTTCGAGGTTGCC  
CTGAATCCGAAGGGATGATTTGTGGTGTCCAGTCTGTAAAAGCTGCA GAAAGAAGCTTTTC TGGGTGATC  
AAAGAAA AACTTTTATATTTAAGGAGAGGCGCCCTT GAAACATTCCTTTTAAGCCAGGATTGGGGTATAGG  
CTT GAAATGCTTTTGGATTCCGTT TTTAGAAAATCAATGAGAGAAGATGAGAGAGAGGGGATGGATTTTA  
CATACGACATCAGATGTTGAATTCGTAAGGGATGAGCTTCTGACACC CAAAAAACTAACCACG GAAAC  
AAGCAGAG CAAAG CAAAGTCCGGAGGCTATGAAAGCCGGCGGGCCAG CAAAAAGGAATCCACACGATGCG  
ATGAATCCTATAATTAAG GAAAATAACACAGAAA AATCA CAAAAGC TTTGGTTGTTATCTTTTCAGCAA  
C CAAA GAGAGA AACTTG TTTAAAAGAAGTCTGTAGGGTGTGACATTC TATTGGGAATATAGATGGTTAATC  
CTCTCTAAGAGTGCATGCAACGCACTTTTCATAGGGACTTTTCGTATTTTC TGAGGCCTCAATGATGCCA  
AAATTGAGGAGTTTAGAAAAGTTCGCCTCGACAGTATACTCCCTTGGAGCTTT TTTAGCATTG GGC TTT  
CCTGTATTACGAGAGGGGTCGATAGAATTTTT TTTAATTTTAGCTGAATTAGAACGCTATTTTCGCGGTGC  
AGTTGGTCTACCACCAAGAGTTG CAAACCAATTGGGGGTGAACGG GAAAAATGAA TAAAAAAGACTCCA  
TCACCTTAACGATGATAAGAA GAAACTACGGATAATG TTTGGGATCTATAAGAGA GAAAAAAGACTCCGG  
AGGATGGGTTGCAACCAACGACCAATGGATTAACAGTCCACTGCTCTACCGCTGAGCTACTCCGGAACAG  
TTCAAGCTACATTCGATGAGAAGGTA TAAAAAGTCAAGCAATTCGAACAAGATT TTTAT TTTTCGAT  
GATTTTC TTTTCGTTT TTTGAGAGTTCTGGAAGCAGATTT TTTTCATAACC TTTAGGCAC CAAA CTTAGTTT  
ATGAATAAGTGCTAGCTCAATAAC TTTTCGGATCATCCCAAGAAGCCAGATGGGTGCTCAACTCTTGCTGT  
TTC TCGAGAGCTTCT TTTTAAATGGGAT TTTTAAAT GAAACATGCGCTGCTGTAATCGCAGCTCTGTGTGC  
ATAGTTGGGAGATGGCTCTGTGCATAGACAAAACCACCTCCAAGAAGA CAAA GAATAAGCCACCAAGAACG  
AATGACACATTCCTCCATATACTGAACCAAGAAGTCTGTTTC TTA CTGCCATACTCGTCCAG GAAACA  
TAGGGT TAAACAAA CGAATAGTAATCCCTTGTGTT TTTGATA TTTCCCTTGGCGTTCTGCATAAGATA  
CATCACAAGCAGCATCTCCTT CAAA GAAGAGCACTTGCGCGATCCCTTCATTAGCATAGAC TTTTCGCTGG  
AAGTGGAGTAGTATTG GAAATCTCGATAGTTACGTATCCTTCCACTCAGGTT CAAAAGGAGTGACATTC  
ACAATCAATCCACAACGTGCGTAGGTTGACTTCCAATACACACAGTAAGGACATTACGAGGGATAC GAA  
AATATCCACGCTGCGAGCTAAAGCAAAGGAGTTAGGAGGAATGATA CAAACATCATCCACGATG GAAAT  
CAGCGCATCTTCTGTAAAACATTTTCGGATCGACAAGTGAATTGTACACATTGGTGAAGACTTTG AATTCT  
CTCGATATGCGTAAA TCATACCCATAACTTGACAAGCCGTAGCTAATGAGTT TTTCTCCAGTCTCTGGAT  
GCAG TTTCACTTGACTGTCTGT CAAAAGGCTCTATCATACTTCTTCGATTGCCAT TTTGCGAATCCAGTT  
ATCTTCCTTAATTCCCA TAAATCTCTCGACTG TTTGTTATCTATA TTTCTAG GAAAAGAC TTTAGTTAG  
AAAAAAGAGATAAA ACTCTCAACACTACAGCATGTGCAATTGTAT GAAAAGACGCAACTTTTATGCC  
TTTGTGCAGAGGTTTT TTTCTTTAAA TAGTCTTTA TATAGAGAAA AAGAAGGATTAGAGATAGGGGAAT  
CCCTCTTGACTTCAGCCGTTGGAGGATGT CAAAATACGATTTCTTGAT TTTGGATTAGCGAATAAA TAACT  
ACTATTGCGAATACTTATATGACTCA TAAATTTCTGT TTTACATCAGGATAAAAAG TTTGATT TTTCTT  
TAAGGC CAAAGAAA CTAACAGAGT TTTGTGGG CAAA AACAATT GAAA GAACGATTGGATTTATTTCTTCG  
AGCTGCTGTCCAACGGAATGAAGTCCCCGGACATG TTTATTTTATGGTCCCCAGG TTTGGGTAAGACT  
TCGCTGGCACATATATGGCTAACACGATAG GAAAAGGCTTGGTAATTGCTTCCGGGCCGAGTTGT TAA  
AGCCTTCCGATCTCATAGGACTATGACCGGTCTACAAGAGGGAGATATTTT TTTCATCGAT GAAATCCA  
TCGCATGGG GAAA GCTGCTGAAGAGTATCTCTATCCTGCCATGGAAGAT TTTAAA GTAGATATTACCTTG  
GATTCAGGTCCCGGAGCTCGCTCAGTGCCTCTCGA TTTAGCTCCA TTTACTTTG GTAGGTGCGACCACTC  
GCGCTGGAATGTTAAGCGAGCC TTTGCGTACGCGT TTTGCTTTTACTGGGCGTGTAGATTACTATACTGA  
TGAAGATCTTG TTTCCATTCTTTCTCGTTCCTCTCAGTTGCTCGCCATAGAAGCCAATCAG GAAA CTCTA  
TTAGAGATTGCTAGAAGGGCTCGAGGGACACCAG TTTGGCTAATAA TTTACTTCGATGGGTGCGTGAT T  
TTGCT CAAATGCGAGAGG GAAA TTGTATTAATAGCGCCGTAGCA GAAA AAGC TTTAGCTATGTTATTAAT  
AGATAACTTAGGGT TAAA CGAGATTGACATTAAGCTTCTCTCCGTGATGATTGAT TTTATCAAGGAGGC  
CCCGTTGGAAT GAAAACGCTCGCAATGGCGGTAGGGGAAGATGTCAGA ACTCTGGAAGATATGTACGAGC  
CCTT TTTGATTTTG AAGGG TTTGGTT CAGCGAACCGCAAGAGGACGGGTTGCAACCC TTTGGCATATGA

ACATCTTAACAGGAACCCTAAGGACAGGTGGGAGAAGAATAAAAGTGAAAAAATTAATCTACTCGTACT  
GCTAGGAGTTTTTTGTGGTGAAGCGGTGTTGGAGATGCAGATGTTAAAGTATCCGATGCCCTATCGCAA  
TCTATTCTTGTGCAACCAAAAATCCGAGTTCTTTGCTCAGTGAAAGTACTACAGCTTTGATTGAGGCTA  
AGGGAGCTTTTTCAGTATTCGGAGATGGTGAGCTTTTACGGGTTTCTTCTCAAGGACAACGTTGTGCGGC  
GCATGCTTTGTATGGAGGCATTCGTTGGGAGAGAATTATCCAACGTTGAGTGTCAAAAATCGAACCT  
CTTGATGGAGCAGCCTCGCTGTTTGTAAATGGTATTCATAACAAGGGTGCTATCTATATTCATAGAACGG  
ATCGCAGCTGTTTGTTCATAGTGAACGAGCTCGCGGTAGAAGACTATCTAAAGTCCACTCTTTCGTTAA  
ATATTTGAAGGAATTAGATAAGGAAGCTTTGTTCAGCTTGTGTGATTTTAGAGAGAACGGCTCTTTATGAG  
CGTCTTCTTGCTGGAAATTCATAGCTTCTGGCATGTCAATGCTCAAGAGGATCGTTATGGAGGATTTG  
GTGTTACGTCGCAGTTTTATGGTGTAGAGGAGGCTGTAGACTGGACCTCTCGATTGGTTCTCGATAATCC  
GGAAGGGCTAGTGTTTAATGCAGACTATCTATTGCGAGCAAAATGTAGACCCTTAGCTATAGAAGGCTAC  
AATGCTCGGCAGATTTTAGAAAATTTCTATAAAAGATGCAGATCTCGTGGTGATTGAGTCTTGGGAAGATG  
ATTGTAAAGGTGCTTAGAGGCATATCCTAAGAAGCTTGGTAGCAAAAGACCCATCTCTAATGAGCTGGG  
TCTTTTTTTATCTAGATTCGAAGGAGGTTTTCCTTCTGCTGATGGCTACCAAAAGAGCTATAAGGTTCAAG  
AGAGAGTTTGGGAGATAATATCTGAGAAAAGAATCCTGTTGTGCTATCTACAATTTTTCATAGGCCAAA  
TGTTCTTTCTTAGGTTTAGGTAAGAGATCTCAATACGTTTCAATCCACTATAAAAACGCTACGAAATAAC  
TGTAGTTCAGGTGTTTCAACTCAAAAGCTAGATAATGATCGGCTCCCCACTCTCTGGGAGAACCCTTTGT  
ATTTAGCCAGGTAATCGTATCTTCTGATAAGAAAAGAGGTATTGAATAATTCGGTATAAGCTTTGCGCAGA  
GCAATGACTTGGCATAAGAAAGAAAACAGTTCTTTCCTTTCAGCTAATCGATCCCAAAGAAAAGTAATTGA  
TCTTAGTGTCTAAGCACCAGTGATTATTAATTTCCATAAGCTGTGTGCCATATTCATCTCCGGATTGTAT  
CATGGGAATTCCTTGAGATAAAAAGAGAGCAAGAAAAGAGTTTTCATTTTGCGTTCACGTAGAGCGCAA  
ATGGTGGGATCTGTCGTTTCTCCTTCGCAGCCAAAATTATAGCTATAGTTTGTCTGAAGTCCCATCACGAT  
TGTATTACCATTCTCTTCATTGTGCTTATCGTTATAGGCAACAGTATCGTAGAGTGTGAAGCCATCATG  
AGAGCAGATATAGTTAATCGAGTTCGTAGGTTTCCATTGGGATAGATGTCATGAGATCCAGATATTCGT  
GAAGCAAAGGAACCTTACTTGATGAGCATCTCCATTAGGAAGGCTTTTACATGGTTCACGGTAGCATCCAT  
TCCACTCGCTCCATCGGGTTGATATAGAGGGGAAGTGTCCAAGCTGATACAAACTCCAGCGTCCCAAGG  
TTCAGCGATCAGTTTAGTTTTCTGATAAAAATGGAATCAGAGGATATAGCTTGCAAAATGGGGGTAAAGGG  
AGAGGGACTCCTTGTGGATCTCTAGAGAAGACTGAGGCTAAATCAAAACGAAATCCATCTACGTGCATTT  
CCTGTACCCAGTACCGCAAAGCATCAAGAATCCAATTTTCAGAGTAGTGGGGGTGTTGGTATTGACTGTATT  
ACCACACCCGGAGAAAATTCATGAGATCCCCATGATCATTGACCATATAATAGGATTTTAGATCTATCCAG  
GGAAGAGGGCAGCTGTGCTTCAAAGCCTGTATGATTGAAAACGACATCGAGAATGACTTCGATTCCCG  
CACGGTGTAAACGCTTTGACAAGAGTCTTGAACCTCTCGGGCCGGAGCGCAAGGGTCTGCCCCATAAGTATA  
ACGGCGAGAGGGGCAGAAAATAATCACGAAGAATACCCCCAATAGTTACACAGGTGGGGGAAGTCCGTA  
TTTTTAAATGGATGGACGGTTTCATCGAATTCGAAAATAGGAAGAGTTCAACTGCATGAACGCCTAGTT  
GTTGAGGTGGTCTATTTTTCGATGATAACCAAGGAAAGTTCCAGGATGGGAAACCTGGGAAGACGGATC  
TCGGGTGAATGACCGAACATGCAATTCATAAAATGAAGTAATTTTCTTTTGGAAGGTGCAAAGGAGTGTG  
CCTTCCAGTCAAAATCCTCATAATTCAGGTAACAAAATGCGTAATCCTTTCTTGTTTAGGGGATCAA  
ATAGTTGAGGGGAGTAGATATTCTTAGAATAAGGGTCTGCGATGTAAGAATCTGTAGCAAACTTTGAGA  
GCTCAAGTCTGTACCACGTAGTTATAAGCATAACGACATTCACTAGAAATGCCTGCAATTTTGATATGC  
CAGATGGCTCCAGTCTGTGGTCCGTTAGAAGATAGAGGAATTTTCATGAATTTTCAGAAAGAGGGTCTAATA  
GTACAAGAGTAACCTGCTGGGCTTGTGAAGAAAATAGAGAAAACGGTAGCGATCAGCGGAGAGCTTTTT  
GGCTCCTAGAGGTAAAGGGATAGTGAACGAACAGACAAAGATTCATAAAAACCTAGAACAAAGTAAGTTT  
AATAAAAATCTAACCGAAGAAATGAAGAGAAGAGGGGGGGGGCTTAAACACAAAAGGAAGAGAGACCCTC  
TTCTTTTGTGTTGATGATAGCAAAACTTTTATGCACGGATTCTGCTGGAGGAGGTTGAATTCCTCCGCC  
ACCCCTTGAGGCAATTTGTGGCATGGTATCAACAGTGGGTTCTCGTCCAGCGCTGATATCAGAACAAACA  
GTTTCGCCAATTTCAACAGGTTTCAAATAAAGCTGTGCAAAAGCTTTGAGTAGGTTGGTCTCTGCATACT  
TCATGTCTAACACGCAGTGCATTAAGATCAACTGTTCTTAGTAGCGACTCCTACCCCTCCACCAGCCAT  
TTGGCCTCCGAGCATAGAGCCTTCTAACAATCTCATATAGAGCTAACTTTCTTTGCGGATTGTCTGGC  
AGTCCGTCAAGAAGAGGTGCGTAAACATAAAGGCGATCAGAGTGTCTTTCGTAGGTCAGGTGAAGAAGAA  
ACTCTCCATCAACAAACAAAATGCACGATTATTCTGATCGAAGGCCAGTCCGGGAGTTTAAGCTCTTT  
AGCAAAATTTTTTAGATTTTCTCAGCATTCTGCTGGACATGAGGGAATCTCCTTCGTACTGTTTTTTT  
TAAACCTAGCATAAGCAGGTTTGTAGTAATGATTAGAGCCGCGATCAGGTGATTTGCTGTTAGGCAAG  
GCCTTCTATCGAGGCTGGTGGCAGATCCCTCTTCGGAGTTTCTAATCAACTAGGTCGTCTAGCTGGTA

AGAAAATAAGAAGGCGCAAGCTCGTTCCTTCGGTCTATTATGTGTTGAACGTACGCTTC TAAAACACGC  
TTTAGTTTCGGTAAA CTTAATCTAGCCGTAGATCCAAC TAGGGGACATTGTACAGGATATTTTTTTTGG  
TTATTTTC CGCAATACTCTATAGAGAATACTTGTATTCAC GAAA AAATCGGTCTTAGTGTACAGT TTTCT  
CTGAAGA TAAA GAGGTTCCGAAGGGACGTCT TTTATTTGAAA AAGA GAAATTCACAGGAAG TTTCTGATA  
GATAAGGATGGTTT TTTATGTTGTTCGGATA TTTGGTAGGATTTCTAGCTGCCGATCCTGAAGAAA GAAT  
GACATCCGGAGG TAAA CGGGTTGTGT TTTACGTTGGGT TAAA ATCTCGTGTAGGATC TAAA GAT GAA  
ACAGTGTGGTGCAGATGCAATATCTGGAACAACCGTTATGATAAGATGCTTCCTTA TTTGAA GAAA GGTT  
CTTCAGTCATTGTTGCTGGAGAGC TTTCTTTAGAAA GCTATGTAGGTAGAGACGGTCTCCACAAGCTTC  
TATTTTC TGTAAGCGTAGATACAT TAAA ATTTA ATTCGGATCTTCTCGTCTGATGCTAGAGGTT CAGAT  
GAAGGTCGTACAGAGCTAATGATAATGTCTCTATTGGA TTTGATGGA GAAA GTTT AGATACAGACTCTG  
CGCTTGATAAGGAAGTCTATGCAGGG TTTGGAGAAGACCAACAGTATGCTAGT GAGGATGTTCTTT TTTA  
GTTACAACCTACAAGCTGTTCT TTTCTGGGCCTCT TTTAGAAGAGA TTTCTTTTC AGTAACAGGGGCCTA  
TTCTATTCATTTG ATTCAATCCCATATCTTAAAGAAGCTCTTGAATCTTCTTGTCTATAGAGTAACAGAGC  
TTATTTTG TAAAAAGACTACTC TTTCTATAGTCTTTT TTTCTATCTCGGAATAATGTAGAGAT GAAAAC  
CGTGTGTTGTTTGCTTGTCTGGCCT TTTCTACTGCAGAGAATGGGT CAGGCCG CAGCTTGAGACG GAAA  
TGGG CAAAACGCGTCTACTGGTG TTTAATTATTGACTCAATCGATTCAA CAAA GAGGTTATTGTGGTAT  
TACTCTATTCTCAAGCGAGTTGGGATCAACGATC GAAA GCGGATGCTCTTGTCTTCTCTTTTGGATGAA  
GAATTC TAAAGCTCAAGAAGCTGCAGTTGTTGATGAGGACTACAAGCTTGTCTAT CAAAACGCATTATCC  
AATT TTTTCAGGGAA GAAA GGGGAAA CAGCTTTTCTTT TTTGGAAA TGATCACA CAAA AGAACAAA AAATTG  
TTCTTCTTGGTCTAGGGAAGAGCGAAGAAGTATCCGGAACAACCGT TTTAGAAGCCTACGCTCAGGCTAC  
TACTGT TTTAAGAAA AGCTAAGTGTAAGACTG TAAA AT TTTA TTCCCAACAAT TTTACAGTTGCGCTTC  
TCCGTAGAAGAGTT TTTAACGAAC TTGGCAGCAGGGGTGCTATCTCTGAAC TATAATTACCCAACCTATC  
ACAAA GTGGATACGTC TTTGCTTTTC CTAGAGAAA GTGACTGTAATGGGTATTGTCTCTAAGGTAGGGGA  
CAAGATC TTTAGAAA AGAAGAGAGCCTAT TTTGAAGGGGTATAT TTTA ACTAGAGA TTTAGTGAATACCAAT  
GCAGATGAAGTCACTCCA GAAA AACTTGTCTGCGGTAG CAAA AGGCTTAGCAGGGGAGTT CGCGAGTCTGG  
ATG TAAA AATTCTAGATAGGAAGGCGATAT TAAA GAAAAAATGGGATTGTTGGCTGCTGTTGCCAAGGG  
CGCTGCTGTTGAGCCTCGG TTTA TTGTTCTGGATTACCAAGG TAAACC TAAATC TAAAGATAGAACC GTA  
CTCATTGG TAAA GGGGTAACATTTCGATTCCGGAGACTAGAT TTTGAAACCTGGGAAGGCAATGATTACCA  
TGAAGGAAGACATGGCTGGAGCGGCTACCGTTCTAGGAATTT TTTCTGCTTTAGCTTCCCTTGGAGCTTCC  
GATCAATGTGACCGGATCATTCCAGCTACAGAGAATGCGATTGGATCGGCTGCC TATAAGATGGGAGAT  
GTATATGTTGGAATGACCGGCC TTTCTGTAGAAA TTGGCAGCACTGATGCGGAAGGGCG TTTGAT TTTAG  
CAGATGCCATCTCCTATGC TTTGAAA TATTGTAATCCTACCCGCATCATTGACT TTTGCTACCTTAACGGG  
TGCTATGGTTG TTTCTTTAGGAGAATCTGTGGCTGGATTT TTTGCAAATAACGACGTGTTGGCAAGAGAT  
CTTG CAGAAGCTTCATCAGAGACCGGGGAAGCTCTATGGAGAATGCC TTTG GTAGA GAAATATGACCAGG  
CACTTCATT CAGATATTGCAGATAT GAAA AATATCGGCAGCAATCGTGCAGGATCGATTACTGCAGCGCT  
ATTT TTTACAACG TTTCTCTCGAAGACAATCCAGTAGCATGGGCACA TTTGGACATTGCCGGTACTGCTTAC  
CAT GAAA AAGAAGAGTTGCCTTACCC CAAATATGCAACAGGATTTG GTGTGCGTTG TTTAATT CATTATA  
TGGAGAAA TTTCTATC TAAATAGTTATTGTTTAGCGATAT TAAA TAATATGTGTGGTTAGTT TTTAATAA  
AAAGT TAAAAACTAACCATTT TTTAT TAAAGTT TTTCTATTCTCCTTGTGCGATAGAT CAAATAAGTAGTAG  
TTACCTGTCTAATTAGGGGAATGAACATGTTGGGAGTA CAAA GAAA CGCAGCACAA GAAAAACTGCTGC  
CAGAAA GACTGTAGTACGTAAGCCTGCCGCTAAGAAGACGGCAGC TAAAAAAGCTCCAGTAA GAAA AGTT  
GCAGCTAAGAAGACTGTAGCCCG CAAA ACAGTAGC TAAAAAACTGTAGCAGCTCGTAAGCCTGTAGCTA  
AGAAA GCAACAGC TAAA AAGGCTCCAGTAAGAAA AGCTGTAGCTAAGAAGACTGTAGCCCG CAAA ACAGT  
AGC TAAA AAAACTGTAGCAGCTCGTAAGCCTGTAGCTAA GAAA GCAACAGC TAAA AAGGCTCCAGTAAGA  
AAAGTTGCAGCTAAGAAGACTGTAGCTCG CAAA ACAGTAGC TAAA AAAACTGTAGCAGCTCGTAAGCCTG  
TAGCTAA GAAA GCAACAGC TAAA AAGGCTCCAGTAA GAAA AGCTGTAGCTAAGAAGACTGTAG CAAA AAG  
AGTAGCTTCAA CAAA AAAATCTTCCGTAGCAG TAAA AGCTGGAG TTTGTAT GAAAAAACATAAAA CATACT  
GCAGCTTGTGGACGTGTAGCTGCTTCTGGTG TAAA GG TTTGTGCTTCTGCAGC TAAA GAAA AATGAATC  
CTAACCGTCTCGTACAGCTCACAGCTGGCGTCAACAATTAAT GAAA TTAGTCGCTAGATAGTCGTATCG  
CTTTCTGATGAT TTTCTAAGTAGCCGGGAATAAGAA TCTCT TTTCTCCGTTT TTTGTAT TTTA TTGGCTGA  
GTC GAAA TGCCTTAAGAAGAT TAAA ATCTGGGAA CAAA AAGAATAATCCAGAAT TATTGGGT TTTGGCGA  
TGGATTATGG GAAA CAGCCAGAATAGTATTACATAACGTCTAC TAAA GAT TTTGTTCAGTATATTGAAC  
GTGAACGA TTTAGAGTGATTGTGATTGGCTCTTCATCTCTTGAGGA CAAAGATATCT TTTCTGGAAC TTTA

TATTTCTGGAAGGAAGAGCTTTTTGACGGACAGCGTTTGTTGCAACAAGAGCTCTTATCTTGGACGGAT  
CATTTTGTTTGTTCGCTTCCCAAGAGACTATAGGCCATTTATCAAGCAGAGAAAATGAGCTCTTCTCTAC  
AAGAGTTTATTATAGATTACACTCGGCATCCTAACCCGAATCTTACGTTGTTCCFTTTCACAAATAAAGC  
AGAGTTGTTCTCTTCTTTATCTTCGAAGCTTTCTAATGCTCTTTGTTTATCTTTATTTGGAGAGTATTTT  
GCTGAGCGAGATGCTCGCATAGCTCAGGTTTTGA TAAAACGTTCTAAAGAGTTGCAGCTTTCTTGCTCTT  
TAGGAGTTGCAAA GATT TTTGTGAGTAAGTTTCTCAGACAGGTTTATTTGAAA TTCTTAGTGAA TTTCA  
AAAGTTGATTTGTCAGATGGGAGACAAGGAATCTATAGAAGCTTCGGATATTCAATCA TTTGTAGAGAAA  
AAAGAGGCGATCTCTCTGTGGAAGTTGCGAGATGCTCTTCTTCG TAAA GACCGTGTCTGCTGCACACAGTC  
TGATGAGATCTTTG GTGTCTGATATGGGAGAGGAGCCTCTGGCGATTCTCAACTTTTACGTAGTCAGTA  
CCTCTTAGGACTGAGGGCAGTGGCAGAGCAGTC GAAA GAGCGTAAAACA CAAA TA TTTATTGCTGCAGGA  
GAGCCGGCTCTTTTAAATGGTTTGAACCTGTT TTTCCATACGGAAA GTTTAATTAAGAATAACTTCCAAG  
ATCCCATGCTTTTCATTAGAAATGCTAGTTTACAGAC TTTAGATT TTTATTTGATGGGATTT TTTCCCTGT  
ATATTT TTTTCGTAAGCATCTTTTA GAATAGTCTCCAGTCTAATGA TTTAGAATACACTTGTGGCTATGGC  
GCTGTATCTTCTTCCCAATAC TTTAGGTAGTAAAAGATCTGAGGACCTTCTTCTTCGGTTGGAGAGATT  
GTTCCGAA TAAAATCCAGGGATTAATAGTAGAAA GTGATCGTGGTGGGCGGTTATTC TTAAG TTTATGGA  
AAGTAGAAGAGCCTCATAGGTTTCTCTTGCCGTGATGAGCAAGAATGACACTTCTGTTAAGGCTTGTGA  
CTTTTATTTAGAGCCTATTCTCAAGAAGCAAGAGTCTTGGGGCGTCA TTTCTGATGCAGGGTTGCCTTGT  
ATTGCTGATCCTGGGGCTAAGTTAGTCCGAAGAGCTCGGACATTGGGGATTCCCGTGCATGCTGTATCTG  
GCCCTTGCTCGATTACGCAAGCGTTGATGCTCTCTGGACTACCAGGG CAAAATTTACATTTTCATGGTTA  
TTTGCCC CAAAATCC TAAAGAAA GATCTCGTTA TTTGCGAAGTTGCTCCGGGAAA TCCCATACG CAAATC  
TGTATAGAGACTCCGTACCGTAATCCATATACG TTTGATGCGTTATTAGATCAGTTC CGGATCATGGCG  
AGC TTTGTGTTGCGATTGA TTTAATGGGAGATCAAGAATACG TTTCTACCGAAGCATAGCCGTATGGAA  
TCAATCTTCTGATATCGAAGAGGTTCTGTGAGCG TTTGAAAAAAGTTCCAGCTATT TTTCTATTTATTACT  
TCTT TTTGATTTTCACAGTATCCGCTAG TTTGT TTTGTTTGTAA TTTAATTT TTTCTAAT TAAAAGAAA  
TTAGAA TTTAATTAAT TAAAAGA CAAAACATGAACAAAAAATAAT TAAAGAACGCG TTTCTTCGTCTGT  
TCCGTCGACACCTTCTGATCAGCCTGCCGATCCACGAATCCTGTTAC TAAAATGCTATTTGAATGCAAG  
CTATCTCAGAATCAAGGGGACGCTTCTGCCGATGTTGATGCGATGGTCACCACAGCTCATGTCAAGCTAG  
ACGCTAAGAATCAACAAGTTCTGTAAGGTAGCTAAAAGGGAAGAAGAC CAAAATGTGATTGTA CTCTCA  
GCTTGAAGGATACTTACA GAAA GGATCTCGATCGATCGCGGGATTGTTTCTACCGACTTCTGGAGGGCG  
ATGGTTGGAGACATTAATATGGGGACAAGCCAGGAATACCAT CAAAGGGCTTCTTCTTCTTGGGGAT  
CCGCTATGTTTCTCGGGAATGAATATGCAGCTTCTGTAGGGATTGTACAAGATGTTGTCTGGAGAGTATAG  
AGCTCGTGGATGA TTTGATTGATAGAATCACTAAGTATGCTGTTTCAGGAGAAGGTAGTCTGGAGCAG  
CTCAT CAAA GATCTCGGTAGCCCTCAGGAATCTCAGGCTGGACAGACGCCTTCTGTGACTCTAGAGAAGC  
CTACAGATGCTAAGTGGTTATTGTTAAGCGCTAAGAACGCTATGACAGGGACCTTGCCT TTTGAGAAAA  
ACAAGGAGC TTTGCCAACAACTCCAGATCTTACGATAA CAAATCT GAAA GCGGGGGGATTAGGA ACTATT  
GGAACAGCTACTCC GAAA GATAAGTTACAGAATATAG TTTCTGTTGCCGACCTCACAACTACT GAAA G  
ATTTACAAAATAATGCTCCTTCGGAAGGAACAGGTTACATACAGGTTTACAGCTGGGATCTAGATCTGG  
TTCGGGAACGGACTCAGTATCAGGGGGTGTAGCAGGTGCAAGTGAAGCACAACTGCATCGACCTTC  
CCAGAGTGGACGGGACAAGAGGTGCC TTA TTTG GTGGAGCAATCCCCGATTCTGTTTCAGGTTCACTAA  
GTGTACAGAATCCTCTTAAGTCTAGTAATGCAGACAATTATAT CAAA AAGGATAACGGGACTTATTCGCT  
TTTGCGAAGAGGTC TTTATCTTATCACC TTTGCGTACGAGTTTG GTTCTCCAATA CAAAATGGAGCTGTT  
ACCTGTACAGGGACTCTCAGAAAAGAAA TCTGATTCAACATCTGCTGGAGGAGATGTGGCAGCTCAGCCTA  
CGAGTGGGGATGCTACAGCCCCAACTGATCCAGAGCCTTACCAGCAT TTTCCGTGGTAGGCTCTTCGGA  
TGG GAAA ACTGTAGTTGGGAGTGCATACAT TTTA GTCCAGGGGA CAAAGCGC TTTCAAAAACATACGCTA  
ACTTTGGCATTAACTCCTGG TAAA AATACAGAGGTGAGTCTTACTTTCAGCTACAGCTTCTAAGAGTTATG  
TAGCTATCTCATATATGGGCGCTGGTTATTA ACTA TTTGAGTTAAGGGAGAGAATCTCCCTTAACAT TTT  
ATACTGAATCGATGTGATCTTTAAGGCTGTGATGGTGTGCAAGGCGTGGAT TTTGCCCTTAGTAA TTTCTC  
CTGAAGTTAATAC CAAA GACCAG GAAA AAGATGT CAAA GTAATACCTGTAGATGTTG TTTCTGGTGGGGT  
GC TTTCCATCGGCTTGAGCC TTTA FTGGATTT TTTG TTGTGATCCTGAATCTGTAGTTGTGGTTGATGCA  
TACCGAATCTGTATCTGCTTGTCTGGCTGGCTGGAGCATTATTGGTACC GGATGATGACGTAGGAT TTT  
CTTCTTGTGAGTCTCCTCCAGATCCAGA ACTTCTCCCGAGCTGTTATTA TTTG GATTAACGTA TTTCCAG  
TTTTAATACAGATCCAGTTGCTTGCACGGGTA TTTG TAGTGTGCAAGATTGTCTGAAGCGAGCGAGAAT  
TTTTTAGTAATAGGATCAGGTGTTGTAGGGGTAGTAGGAGTGGGTGATGGAGTTGCGGATAGGTTATACT

TCCTTGAGAAAAGTTTCGTTATAGATGCAGTTGTCCGACCGTTAGTTGCAGGAGATGACGTTGCTTCTGA  
AGTTGTTTCTTTGAGAGGATGATGGAGATTTAGGAGTTGTGTCTGTTTTTGAGGGGTTACGGTTAGC  
TCTAGAGAAATAGGATCTGTAGATGTTGGAGTTGTGTTGTTTGATGGTTCCAGGTTCCCTTGCATGGAAA  
AGGTAAGAATACCCGTTTTTTGAATTACCAATTTCTGATCGTGAAGAGTCTGAAAAGGAAAAGAATTCCTC  
CCAATAAGGAGATTTTTCGAGAATGTAGTGTGTTGGAGATCAGTGCCCTCGGCAGCCGGGGTTAATTTTCG  
GTATCAGTTGAACCAGTAGTAGTGGCAGCTAGCTCTCTAAATAATGAGGAGGCTCCGTTTGAAGAGGATG  
GTGGATTGTTCCGGTGTGTTGCTGTTGTCTGGAGTAGTTGGTGCAGGAATTTGGGGTAGGAGCTTGTAGCCA  
GTATAAATATTCAAAAACGGTGATATTGAAAAGGTTTGATCGTTGTTTTTTAGAAAAGCCATTTTGTGGA  
GAGGTGATTTTGGCTTGTAACAACTCTACATTGATAGCACTTTTGTATCTTTATTTGTGGGAGTTCCTA  
GATCAGATACGGTATTACTGTTTCATATCAATATTTTCGATAACAGTCCCTCCACTTGTTTTCAGAAGATC  
TGGGTTAGTGACAGTGTGAGGATCTCAGCAATACCGAGAAGTTGGTGTAACTGGATATTTGTGAGTTA  
ATATCCGATAGGCTGCGACAGCCCGTGAATTTTGTATTACTTTTGATTTTCATCTGCTTTTCATTCA  
AATAACCGATAGTGACAGCAGAGCCATCATCAGGATCTTGTGACCCTTTTGTCTGTACATCACAATGTC  
GGTGACATTGTTTCCATGTCATGTCCCCAGTCATTGTGCCCCCTTTTGTGGGTAAAGAAAACAGGA  
TTAGGGTCATTTTCTTTGGTGTAGTTTTCTTTTAGATAATTTGAATGTGACTGCATCTGTGGGATCTTTAG  
GATTCTCTGATTGTGTGATGGGTTGGTTATGTTTAAACAATGCCAGGAGTAGACTCAATGCCTGTCTCACT  
AACCCTTAAATAAGACTTTTGTCACTACTTTTATTAGGGTTCCAAAAGGAAGAAAGAAATATTATTTTTTATA  
TCGTTCAATTATTTCTTTTAAAACTTTTAACTTCGTAAATCTCTATACTATCTTATTTTTAAATCATTTT  
TGAATTAGGTGATGGAGACGAAGGTGTTTTTGTGTTGGAGGAGTTGTTTATTGGTTACGGTAACATCC  
GTTGGATATAGAGCTGCTTCCCAAGACCAAGATGATAGTGTATTTGTGATGAGGTATCACCTCCTCCAT  
TAGAAGTTTGGGAGGTAGTTGTAGCCATTTTTACACTAGATGTAGTGTGTAATAGGAAGTTGTAGTTGTAC  
AGATCCCCAGAGTATAGTGTGAGAGGGATAGTGAGCGTTTTCGGTTGCTGAAGATGATACTGAACCCTT  
CCTCCATTAGAAGTTTGGGAGGAGGTATCCATTTTTATGTCGGATGCGGTCTTAATAGGAAGTTGTAGTT  
GTACAGATCCCTAGAGTATAGTGTGAGAGGGATAGTAAGTGTAGTTGCTGAAGCGTCTCCAGAAGAGTC  
TGATCCGCTACTAGGGTATTGGTTCCACTAGAATTGTCTGGAGTGAAGTTAGTTACGGATATGGTCT  
TTGGGTGTTTGTACTTCCATCAGCTATTGTGGCAGTTGTAGGACTCCACGTCCCTCTTACAGATAAAA  
CCAGTAGGCTGCGGTTTTTACTTTTAGATTTTCTTGTCTGCTGTAAAGCATTTTGTCCGGCTAGTTCACT  
CTTAAATCAGGTTCTGTAGGAGAGGAAGATCCGTTTGTGTTGCTGAGCCATGGGATGTATCCATTGAAT  
GAGATTGTTGGAGAAGTTGTGAGTGTGGAAGAGTATTGAAAAGAAAAGCTCTCTTAGGTTGTTTGTAGTT  
TGGACTCCAGGTAGTTACATTGGCTGCATAATTACTGTACCAGTATCCGGAGTTTGTATATTGGCGAT  
CTGTGCGTTGGTCACTTTGAGATCCCTGTAAGCTTATTCTGAGATTGTGTACCACAACCTGAGCATTCT  
TTAATTACTGAAGGAGATCGTCATAAGAATAAGGAGGAGATTCTTTTCTTCTGTATCTGTGGTAGGAG  
TAGGTTTAGGTGTTCTGGTACAGGATCGGTATCAGCGTCCGGGTTGATCGTAAATTTCAATTCCGAGAGC  
TTTTGAGCCAATGCGATTTTTTTTCTACTTCACTAGCAGAAATTTAGAGCTGTGCTTAGTTGTCATTA  
TTCAAAATCTTATCAACAATACCTTTGACATAATTTACAGTAGCTGCTTCTGAGTAAAAGCTTCCCATG  
CTGCATTGTAATCATCGATTTTTTTCTGGTATTCTGCCAGCTTTGTGTTGTACTCTTTGATCGCTTGTTC  
TTGTTTCTCGGCTGTTTTTTTGTGTAACCCCTCTTCTTCTCGAGGATCTTTTGTTTAGAGGATTCTTCT  
GGAAGAGTTGCGGATGGTTTGGTGGGTTGCTTCAAAATAAATACGGAATGTGTCCCATATTAATGTTCC  
CAGTCATGCTTCCCTCATGAATGGGAAGATAATCTGGATTTTGGGTCATTTTTAGATAGATAGCGTGCTTG  
AAGGTATTGTAGTGGCACAACATCCGTATCACGAGTCCGAGTAGCTACTCCGCTTAACCTAGCTTCGTTA  
TTAAACTCAGCTTAGTGAATGAAGAGAGCTGTTGTGAACCAATACTCAGTAAAGCTCTAGTGGGTGTAT  
TTCTGTTGGATTTTCTAGATGCGTTTTTTTATTAATTCGTTCTTTTATTATTATTTTCAATTAATAA  
TTAATCGATTTTATTGTTTAAATATCGATTAATTTTATTTTAAATGAAAAGAAGAAGCCATG  
ATTTCTTCTGCTATAGAATCATGAAAAGACGCCCTTTTATTATTAATGAAAAGCTTTGTATCCTTAG  
TAAATAGAGAACCTATAGACGGGTGCATTAATAATTTCTGCTACGAGTTCCCTGAGGAAAACCTCAAAGG  
GATGGGGTCCGAGAGACGGAGGCGCAAGCTAGAGTCTCTTTAATGCGTTCGTTTGGAGGGAGCTCTTCC  
ATAGACTCTAAAGTCCGATAGATGTTGATGCGCAGCTCGTAAGTAATGCGAGATCCTAGAAAAGGTTTTGG  
ATCGAATGCCATGGAGATATTGTGAGGCAAAAATCCTAATCCTAAAGAAAGGCTTAGCTGTCCAGTAGTA  
GGTATTGTGTTTGAAGCCGCTTGGTTTTTGTCATAGGAAGCAAGTTTCATAGCGAGTAAATCCTTGATTC  
TCTAGCAGCTCTTCCGCTGCTAGTGCATCTCAGCTAGGGAGTGTCTATCTGCTATGGATGGAAGAATAC  
GTTTACGGTGTGTTGTAAGGAGGTTGTGAGGGTCTATAGTTAGATTAATAATAGAGATGTGTTGGATTGG  
GAGAGAAAATAGCTTGGCGAAGATCAACAAATAATCACTAATCGACTGTGTAGGGAGGCCATAAATAAGG  
TCTGCAGACACATTAAGAAATCCGTATTGGGAGCAGAGCAATAAGGCTTCAATCGCTTTAGATGAAGAGT

GTGTGCGTCCTAGTAGCTTAAGTAGGGGATCATTGAATGTTTG TACGCCAATGCTAATGCGATTGATCGA  
GGTCAAGGCGAGAGCCTGGATATACTCCAGA GAAA GATTTTCAGGGTTTGCTTCAAGAGTGA TTTCTGTG  
GCATGCTGAGCTTCTAGAGCTACGAGAATATCTTGAAT CAAA GCAGGGGGAAC TAAA GAAGGAGTCCCTC  
CTC CAAA GAATACTGTATCAATATAGTGAGAACAACGTAGAGGGGCTAGTTTT TTTAGCCCTC TTTAAT  
GACAGCTTACAATAAGAGCGCATTAACCTTTC TTTA TACGGGATCGTATA GAAA CTACAATAATGACAT  
TTCTTCGAGCA GAAA GGGATATGTATG TAAA GAGCTAAGGGAGTCTTACCATTCAATCGCGTCAGGATCT  
ATGATGCCTCCTCGGCGCCAACGATTGCGATCGCT GAAA GGATCCTCATCGTCTTACTAGAGTAGTCGA  
GTTTCG TTTCCGC TTTCTTCTCTGCTCATCACCTAGGTCAATCTCAATTGTGTCACCGGCATCGAGATC  
CACTTCTGTATCCGAGGATTCTA CAAA CTCAACGCTC GAAA CGCTGGGGCCATCTGGG TAAA TGGT TTTA  
GCTGGAGTTCTTCGAGGGTTACGTACTC TTTG ATCTCACCCT TTTCTTTGAGAAGTTGTAGACGTTCTT  
TC TCTTCAAGGAT TTTG CTTTC TAGCAGACGGAT TTTCTTCTGGTGTCTCTCGA TTTCTTT TTTAGGAAC  
AAGGCCAAGTTGCATCCACTGGGTAAGATCATGAAGCTCTGATTCTAATTTTT TTTAAA CGCTCACT TTTT  
ATTTCG TAAA TAGTCTGTCTATGATT GAAA CCG GAAA CCCCCTGAGAGCCAATTTA CTTGCTTCCTACC  
AAGGGTAACTGCATCT TTTG CTGAGATAGAG CAAA AAGTGAGCAGGCA TAAACAAA TAGATCAGGAGAGA  
T TTTG GCTAG TAAA AACTCATT CAAA GTATT TTTG TCAACTGATAAGCCAAGCTCTGCTAGCTCTTGTA  
AGAAGTCAGGAGGCTAGGGTATTGATACT TAAA AAAAAAG CAAA G TTTGCTTTT TTTGAAAA TAAAA  
T TTTG ATATGGGAAT TTTCTAAA AGTATCACCTTCAATCGATAGATTCTGCTTATGGATTGAGAC TTTG  
TAGGCATGTGCATTCAATCAGATATTGACTGGATAGAATC TTTG TCGAGCGA TTTG AGAAGCATGAGCCG  
ATGGATTCTTCATG GAAA ATATTTCTTTG AAGGTTATCAAGTTGGGAAGACGGAGGGGAGCCCAACAGAAT  
CTTCTCATGATCAATTC TTTACGTC TTTG CAAGA GAAA AAAGCACACAGTCT TTTG ATGATATACCGTTA  
TTACGGCTA TTTA CAGGGCAAGTGTCTCCAATATCCTCATCAGAAGAATCTTCTCTAGTTACA GAAA AG  
GTTTCGTAAT TTTG ATCCTCAAGAAGAGATTCTTTC TTTA GGATPATTACCGCAATCTTATGTTTCGTATAG  
CAGAC TTTATT CAGGTAT TAAA AGAGAAGTATTGTGCGAGCATCTCTGTTGAGACATTGAATTGCTCTCC  
TGAGATCCAAGAATATGTCTG GAAA CTGATGGAAGGAGAGAAGCCCTC TTTAAC TAAA GAAGTCTTCTG  
GCGGATATCGAGACG TAAA AAGAGCAGTAGCT TTTG AAGAATT TTTACAGGT TAAA TTCACAG GAAAA  
AGCGCT TTTCTCTAGAAGGTGGAGAGAGCTTGGTTCCCATGTTGGAGCATCTCATTTGCTTGTGGGTTAA  
GCAAGGCATCAATCGTTACGTGATGGGAATGCCCTCATCGAGGCCGAT TAAA CGTCTTGTGTAACATT TTT  
GGAAA GCCTTACCGGCAGAT TTTCTATGGAG TTTG AAGACGCTCCC CAAA TAAGAGGGCTG GAAA CTGTTG  
GTGATG TAAAGTACCACAAGGGATATGTTGCCAATAGGCCGGAACAGAACGTTATGATGGC TTTA TTGCC  
GAATCCGAGCCAT TTTA GAGTCCGTGGATCCTGTTGTGGAAGGTGCTGTAGCAGCGATTCAACATCAGGGA  
GAGGCTGGGAAGGAGCAAGCCTGCTTAGCTGTGTGATGCATGGAGATGCAGCCTTGGCGGGT CAGGGCG  
TTGTATAT GAAA CTTTC CAGTTGAGTGGGATAACCAGGTTATTCAACAGAAGGAACGTGTCATATTGTAGT  
GAATAATCAGATAGG TTTCACTGCGCAGCCTCGAGAGTCTCGTCTACTCCTTATTGTACAGATATAGCT  
AAA ATGATGGGGATCCCTGTATTCCGAGTGAATGGAGAGGATGT TTTA GCCTGTCTCCAGGTCATGGAGT  
ATGCTATACATATCCGTGAGCGT TTTCA TTGTGATGTGATTATCGACCTCTGTTGTTATC GAAA ATACGG  
TCACAAT GAAA GTGACGATCCTTCTGTTACAGCTCCATT TTTA TACGAAGAGAT CAAA AAGAAAAAACA  
GGGTCAGAATTATT CAAA GAGATCCT TTTACACCATCCTGAATGGAACA TTTCTTCCAACGAGTTGGAGA  
GAATAGACACAGAGATAGCGCATGT TTTAAA CCAGGAGTACGCTTCTCT GAAA GATCCAGGTGTGCAACG  
GCTAGATGAATGTATGCATTGCACTCGTATGGCAGCTGGAGAGCTTCTTGTGCGATAATGTGGATACATCG  
TTAGA CAAA GAAGCCTTG TTTG ATCTGAGTGC CAAA CTTTG TGATATCCTGAGCATT TTTCTCCTCATG  
CAAAGATTTCGATC TTTAT TAAA TAAGCGTATGAGCATGGCTGATGGAGAGATCGGTTATGATTGGGGAAT  
GGCTGAAGAGGTGGCGTTCGCTTCTTATTACAAGAAGGTT TTTCA TTACG TTTG TCAGGACAAGATTCT  
ATTCGTGGAAC TTTCA GTCAACGACAGTTAGTCTGGACGGATGTCCAGACAGGGGATACATTCTCTCCAT  
TATATCACTTGTCTCCGAGTCAAGGCAGCGTGGAA TTATACAAT TCCCCTCTATCTGAATACGCTGT TTT  
AGGC TTTGAATATGGTTATGCACAACAAGCAGAAA AGACTCTTGTTA TTTGGGAAGCGCAG TTTG GAGAC  
T TTTCA ATGGAGCC CAAATCATT TTTG ACCAATATA TTTCTTCCGGAATTCAGAAA TGGGATTTA CATT  
CCGATGTAGTTGTACTGCTTCCCTCATGGCTATGAGGGGCAAGGACCTGAGCATTCCTCGGCTCGTATAGA  
GCGTTA TTTA CAGCTCGCTTCCGATTGGAAT TTTCA AGTTGTTCTTCTTCTACTCCCCTACAGTAT TTT  
CGTATTCTGCGGGAGCATA CGAAGAGAGACCTCTCTCTTCTTATCATT TTTCTCCTAAGATGTTAT  
TGCGGCATCCGAGTGCCTGAGTTCTATCGCAGAG TTTG GAATGAAGGGAGGCTTCAAGCC TTTCTTGG  
AGACGAGAATCCTAATATCATG CAAA AGTTCTTGTTC TTTG TAGTGGCAAGAT TTTA ATTACGACTATCGT  
GCTTCTCTCC TAAA GATCTTGAATGTCGT TTTG CTTGTATACGAGTAGAGAG TTTG ATCCATTATACT  
TAGAAGATCTATTGGTCTGATAAG CAAA ATACGGAAGTTACCAATTATGTATGGTTGCAAGAAGAACC



TCAAATATGGGCGCTTTTAGTTATTTTGCATTAGCAACTGACGAGATTTTCCTTAGCAAAATTGCAGTGC  
GTTTGCCGTCCTAGGAGTAGTTCAACGGCAACAGGATCTGCGAGTTTAAGTCAAAAGAATTATCGATGT  
TAATGAAAACCTGTTTTCATAGGTAGAGAGTAGAGCATGAGTATAGAGGTTCTGATTCCCAATATCGC  
AGAATCTATTAGTGAAGTGACGAATTCGCACTTTTGATTCCATCAGGAGATTTTGTGTCAGGAGAATCAA  
GGGATCTGGAGATAGAGAGTGACAAGGTGAATCAGCTCATTTACGCTCCTTGCTCAGGAAGGGTAGAGT  
GGAGCGTTTCGCTAGGGGATACGGTCGCTGTTGGTAGTGTGTAGGGATTATTAGTGAAGCGGAAAAGAG  
TCAAGATACCGCACCTATCCATGAGCAGATGCCAATTAAGTCTTGAGAGCAGGAAAGCGATGCGCAGATT  
ATTGCCCTCCCTTCATCAGTGAGACAGGATCCTCCTGCAGAAGGGAAAACCTTTTGTTCATTAAGGAGA  
TCCAACCAGCTTCTCTGATCATAGAGAATCTCGAGAATCTATGAGTGTATTTCGGAAGACGAATTCCTCG  
TAGATTGGTGAATCTCTACATGATTCAGCAATGTTAACGACAATTAATGAAATCCATATGGGGCCGCTT  
ATTGCTCTGCGTAAGGAAAGACAAGAAGATTTTCGTTGCGAAGTATGGGGTAAACTGGGGTTCATGTCTT  
TCTTTGTTAGAGCCGTTGTAGATTCATTTGAAAAAATATCCTCGGGTGAATGCTTATATTGAAGATAACGA  
AATCGTTTACAGACATTACTACGATAATTCATTGCCATAGGGACAGATCGTGGATTAGTAGTTCCTGT  
ATTTCGTAATTGTGATCAGTTATCTAGCGGGGAGATTGAGTTACAGCTTGCCGATTTAGCTTCTCGTGCTC  
GGGAAGGCAAACTTGCTATTTCATGAGTTAGAAGGGGGAGGCTTCACTATTACCAATGGAGGGGTATATGG  
TTCTCTTCTATCCACTCCATTATCAATCCTCCACAGGTAGGTATTCTTGGGATGCACAAGATAGAGAAA  
CGCCCTGTGGTTAGAGAAGATGCAATTTGTGATAGCCGATATGATGTATGTAGCTATGAGCTATGATCATC  
GGATTATAGACGGAAAGGACCGTAGGATTCCTTGTGAATGTAAAGAGCAATTAGAACAACCCGAGCT  
TTTGTAAAATGTAGAAGCGTCAGAGAGAGGCTGCATTACTCGTTATCTAGGAAGAAGAAGAACTGCAG  
TGACATTATTTTTCGAGAACGAATCGCTGACGGATCCTGCTGGTGGCGAGATTTTCAGCTTCTGAACGA  
GAAAAGGTATTAGATTAGAAACAAGTGCAGCGTCTGAGATGAAAATATGATTACTGGATAGTCCCTTCG  
GAGAGCAGTTGTTCCTGCTACTGCTCGGAAATCGAGGTGATTTCTTTTAGGCATTAAGGGGAAA  
TAGAAGGGAACAGTCTCTTATAATCTGGATAGACAGCCATATCAGGACCTAGAGAGGGAGATATAGCCAC  
GATAAGATCTTGAGGACGAGTGTGAAATGTCTTTTCAGCAGGCGAACAGTGACAGCATAGATATTGCC  
ACAAGACCTCTCCATCCTGCGTGTACATTAGCAATCACATGGTTTCGTTGGTGCATAGAAAATGGCTGCTT  
GGCAATCTGCATGGTAAATGTGTAGGGAGAGAAGAGGAGTCTGTGTAATAACCCATCGGCAGGCGCTCT  
CTTGGGAGTTTAAAGGGGTGACATAACGTACGCTCGTTCCATGCACCTGACGAGCGTTAATAAATCGTTG  
CCTCCTAAGGAAGAGGAAATGACCTCATCAGAAACTTGACTCGCTTCTTCTTATCATCTTGTTTTGGGA  
AAATACCATGGCGAATAGGAAGGTATTCTAACTCAGGAAATGTCTGTTTACGTAAAGCTTCGGAAGGGAG  
TGTCATCAGGGATCCTATTCTGGCTCTTTTCATACGCCATGTTCTTTTAAACAATTGGACCAATTCTTCTT  
CAGCATTTTCATGGAATGCATGATTTTACACATTTATGTTTACGTATAGGTCAATCATACCTGGTTT  
TGATCCTACGTAGCATAAATCGGCGTCAGCCATTTCTCCTGGGCCATTGACGATACATCCCATCACAGCA  
ATTTTAAACCTCCTGGAAGATGTTTCGTTCTTTTCACGAATGCGTTGAGAAACTGCGAGAAGGTCGAAA  
GCGTTCGGCCACATCCAGGGCAAGAGACATATCCACTGTTACGGACCGAATATTAGCACTTTGTAAAAT  
CAAAAACCCAGAGTTCTAGAGAGTTTAATATCTACAATACTAGTAGTACGCAAGATCCTAACCCTCT  
AGAAGTAAAGCTCCCAACCGAGCAGACAAGTCGATAAATGGCTTCATTTTTAGAAAAGTGAGGATCTAAAG  
AAAAGCTTAAACACACAGGTTGTGTAGAATGTTGTCGCAGAGAAAAGGAGCAGCAGTATGGATATC  
GGTTACTTCAAAATAGACAAATGGAGCAGAAAAGAGTCTCTCAGAGAGCCATTCTCCTCATTTCATCGGA  
TTAAGGATAGGAGCATCTCTTTATTAAGACAAAGAAGATGCTTCTCTATTTTCAGAAACGATAGGAGAGG  
AGCGCATAGCTTTGGGACAACGACTCCTTCCGGGGTGTAGGATCTATTTTCCTGTGGTGTGTCAAT  
GCCTAAGCACTGAAGAAGTTCTATAGGCTCTGCCGTCAGTAGCTGTACATCGGTTAAGTTAATTAACAGT  
CCATAGACATTGTCCAAGGAGGGTATTCAAAAGTGTTTCGAGTACCCAGTTGTTTGAAGAATGGATGG  
CAAAATGGATTGTGCGCTTCTCCCATCTTTTCGGAGAGTTCTGTGTCTGTTTGAAGAATCGATACAAT  
AGGGATCTCATTGATGGGGTACCAGTTAGAGAGCAGCGGATGGTATCACCAATCCCTCTGAAAAGAGC  
GTACCTATTCTACTGCAGATTTTACAATGCCTGCAGTGCCAGATCCTGCTTCTGTAACCTCCTAAGTGCA  
GAGGATAAGACCATCTCGTTGGTCTAGCTCATAAGCTAAAGATCGATACGCTGCCACCATAACTTTTGG  
ATTACTGGAATTTTCATTGAGAAGATGACATCATGATAGTCCATAGCGACACAGACTTCGGCATATTTCAAT  
GCAGAGTACACCATGCCTTCAATCGTAATTTCCATAACGTTGCGTTACGCTTCTGATAAGGAGCCGTGGT  
TAACGCCTATGCGCATAGCTTTGCTTAAGCGTTTGCATTTTTCACAAAGTGAGAGAACTTGTTCATCAA  
ATGCTCTAAGCTATGCGCGTATTGCTCATCAGAGTAAATTTTCAGTAAACATATTACGCTTATCTACA  
TAGTTTCCTGGATTGATACGCATTTTATCTACACAATCCACAACATGTATGGCTGCCCTGAGGAAAAGAAAT  
GGATATCTGCTACAAGAGGGATGAAATGTTCTGTTGAATCAAGCGGTCATTAATGTGCTCGCATGCATG  
AACCTCTCGCAAACTTGTACCGTAACACGAACGATGTCGCAACCCAACTCTTGCAGAGCAAAATTTGT

CTAACCGTTCATCCACATCTGTGGTGGCTGTAGTCGTCATAGATTGGATTTTGATGGAGTGCTCACTAC  
CAA<sup>CAAA</sup>AAGATCTCCGATTCTTACTGGGAGGGT<sup>TTTG</sup>CGTC<sup>GAAA</sup>CGCAT<sup>TTTG</sup>TATACAGGGTGTTC  
CATGACGAGGTGTCTA<sup>CAAA</sup>CAATT<sup>TTTGAAA</sup>TTGGCTGGGACAGTACCGCCGAATCTC<sup>TTTC</sup>TCCTG  
AAGGT<sup>TTTG</sup>GGGGCTGAGGAAGTATAAGC<sup>TTTA</sup>GATCAAT<sup>TTTAAA</sup>GGAAGGTCTCCATGGAG<sup>GAAA</sup>CCTC  
CC<sup>TTTAAA</sup>AATTG<sup>TTTATAAA</sup>ATTCACGGGTGAGGGATGTTTCGT<sup>TAAA</sup>ACAATCACTAGATC<sup>TTTG</sup>GATG  
CGTGTT<sup>TTTC</sup>GCGGTT<sup>TTTC</sup>TACGGCATGGAGTAAGGCTAG<sup>TTTA</sup>GCAGACTCGATCCAT<sup>TTTG</sup>GCCG  
<sup>TTTG</sup>CTTAGCGCTCTTGGAA<sup>CAAA</sup>ATCTCC<sup>GAAA</sup>GAAGCGAT<sup>TAAA</sup>GGAAT<sup>TTTG</sup>GATCATAACGACAACCA  
CAACGAATAGCCTCTTC<sup>GAAA</sup>CAAGCTGTGTAAGCTCGTAAGGTTATCTCATAGCAAGA<sup>TTTA</sup>GACATAG  
AAGC<sup>TTTA</sup>AGGAGCTAGCA<sup>TTTG</sup>GATGAACAATAGAGGCTTGTATAGGTC<sup>TTTGTTTC</sup>CTCATCCAGCA  
AGGCACTAGATGATT<sup>TTTG</sup>TCTTCCCAGGTGGCAGAAGAGCATCTCCTGGAAGTAGGATCCCTGACTCG  
GG<sup>TTTC</sup>GATTCTTCCCAGCACTTGTTCGGTAAGCACAGCAGGGAATGCATCGTTCACTCCTAATCCTCCTT  
GGCCTCTTTCGGAAGGCTGCCGATTGTGTGGCA<sup>TTTG</sup>CAATCGCAGCAGGTAGATTCGATTGCATTCT  
<sup>CAAA</sup>GAA<sup>GAAA</sup>AATTGGCCTGAAGTAGAGA<sup>CAAAA</sup>AATAGTATGAGT<sup>GAAA</sup>GGAATATTCAGGCTC<sup>TAAA</sup>  
CTTGCTGAAGGG<sup>TTTC</sup>TGAAGAACAGAGGCGT<sup>TTTG</sup>TCATTAGCAAG<sup>GAAA</sup>AACGGCATCTGTCTTATCG  
ATTCTATGCAGTTCATC<sup>CAAAA</sup>AGCA<sup>TTTC</sup>ACCGATCGTTCTTCTCAGTGGT<sup>TTTG</sup>GAGGTAT<sup>GAAA</sup>TC  
TGGAGGAGGAGGAGCTATAGG<sup>TTTA</sup>GGTCT<sup>TTTG</sup>A<sup>TTTC</sup>CAGGCAGCTCGGGAGTAGGTTTACAGCAGGGAGT  
TCGGTAGAAGGTCTTCGGGACACAAT<sup>TTTG</sup>GGGGCA<sup>CAAA</sup>CATATCGACAGA<sup>GAAA</sup>TAGTCTGAAG<sup>CAA</sup>  
<sup>AA</sup>AGACTGACACC<sup>TAAA</sup>ATAACAGCA<sup>GAAA</sup>CGGCGATTAGGGCAGGAAGGGAGGC<sup>TAAA</sup>ACGCCAACCAC  
GCAACCAGCAAGTCC<sup>TAAA</sup>ATGATTCAGACGCAAGAGAAGTAATGAGAGCGCGTCTAGGAGT<sup>CAAA</sup>ACA  
GGAAGTTGACAAGAAGGACGTATAGCATTCTGTATCGCGGACAGCGATG<sup>TAAA</sup>CA<sup>TAAA</sup>CTCTTAACT<sup>TT</sup>  
<sup>TAAA</sup>ATT<sup>TTTG</sup>CCCAAGGGCTTAGGACAACACACCGT<sup>TTTG</sup>CGCAAGAATGCAAGTGTCCGGAGGCTAGA  
<sup>AA</sup>GTATCTTAAACGCAGCCACC<sup>TTTA</sup>ATGCAGCATTGACAAGCCAAGCGTTCATTAGAATCTTCAGGATC  
ACC<sup>TAAA</sup>AAATCATACTCAGCCTCA<sup>GAAA</sup>AGTCAGATAGGTTATCCGCGCCTTCCAAGACCTCAATCACG  
CAAGTCCA<sup>CAAA</sup>CTCCTTCCATACAAGC<sup>GAAA</sup>AGCACGCCAGAATGTTTCG<sup>CAAA</sup>CCTCTGCTATAGAGG  
AACCGTCTTCT<sup>TAAA</sup>T<sup>GAAA</sup>CTCTTGATTCTCGTCATCTGCT<sup>GAAA</sup>TGATGAGCTTAGCCATAGGACTCCA  
GAAG<sup>GAAA</sup>AAG<sup>GAAA</sup>AGATTAGTTAAGAATCGGAGTAGAGGGATTGCAACCCCCGACCTATTGCTCC<sup>CAAA</sup>  
GCAACCGCGCTAACCAGGCTGCGCTATACTCCGA<sup>TTTAAAA</sup>AAGTAGGAGCTAAGGAAGTTAGCATATTG  
CCTATACTAGACAAGG<sup>GAAA</sup>GATACTATA<sup>TAAA</sup>TG<sup>CAAAA</sup>ATATTCTTCGAACTTCTTCTTGCAGATATAT  
GTT<sup>TTTG</sup>CTGGGTATTCGTTTCGGTGTGGAATCGGGTGGCTGTTGTGAATAAC<sup>TTTA</sup>GAGGAAGTTCATGG  
<sup>AAA</sup>ATTGTAGCAATCCCAGTTGTATACTG<sup>TTTAC</sup><sup>TTTG</sup>ATATTCCA<sup>TTTG</sup>CCTAGATGGCTGATTGATT  
<sup>TTG</sup>GGGTATGTAC<sup>CAAA</sup>TTTAGCGTGCTCCTTGTTCGATCATT<sup>TTTG</sup>GGTGT<sup>TTTC</sup>TTTACGCTCTTACG  
TTCGGCTCGTAT<sup>TTTC</sup>CCTTCGCTCCT<sup>TTTG</sup>TATC<sup>TTTG</sup>TCTATTGCGACTTGGCCTGAATTTAGCCTCC  
ACCCGATGGAT<sup>TTTA</sup>TCTTCTGGATGGGCTTCTCC<sup>TTTA</sup>ATT<sup>TTTG</sup>CGTTAGGGAA<sup>TTTC</sup>TTTCCTTTCCTTG  
GGAGCATCCCGTTGCTCTTACGGTATG<sup>TTTACT</sup>CCTGTT<sup>TTTA</sup>GTGAAT<sup>TTTC</sup>TCGTCATAACT<sup>TAA</sup>GG  
AGCGGAGCGTATTGCGGAAGTGCAGCTCGTT<sup>TTTC</sup>ATTAGAAGCGCTCCAGG<sup>TAAACAA</sup>ATGTC<sup>TTTA</sup>  
GATGCTGATATTGCTGCTGGAAGGATCGGGTATAGCAGAGCGTCTGT<sup>TAAAA</sup>AAAGCTCTCT<sup>TTTA</sup>GAAG  
AGAGTGATT<sup>TTTC</sup>TCCGCCATGGAGGGCGTATTCCGC<sup>TTTG</sup>T<sup>TAAA</sup>AGGCGATGCGATAATGAGTTGGGT  
GTTGTTAGGAGTGAATATCCTAGCTGCTCTATT<sup>TTTA</sup>AGGACGAGCTACTCATGTTGGCGAT<sup>TTTG</sup>TGGTTA  
ACTGTATTAGGCGATGC<sup>TTTA</sup>GTGAGT<sup>CAAA</sup>TTCCAGCATTGCTTACATCGTGTGCAGCAGCAACGCTTA  
TAGC<sup>TAA</sup>AGTTGGG<sup>GAAA</sup>AAG<sup>GAAA</sup>GTCTAGCGCAGCATCTGCTAGATTATTATGAGCAGAGTCGCCAGAG  
<sup>TTTC</sup>TTTTTATCGCT<sup>TTTG</sup>GATCCTATGTGGGATGGCTTGTATTCCAGGAGCTCC<sup>TAA</sup>AGCTCTGATCCTA  
GGTT<sup>TTTC</sup>CAGT<sup>TTTA</sup>ATTATTCTTAGGGTATAAGAATCCTTCTTCCAGGAGAGACTCTTCTCTTCCAG<sup>GAAA</sup>  
AACGGGTAGAG<sup>TTTG</sup>TATTGCCTGATGAGGGAGTGG<sup>GAAA</sup>TCCTGCTAA<sup>TTTG</sup>TACAAGGACGCCCGCAA  
TCAGA<sup>TTTA</sup>TCAAGAGTTAGGCGTAGT<sup>TTTC</sup>CCGGAAGCTATTGTTGTACGTTATGTAACAGGATCTTCT  
CCACG<sup>TTTA</sup>ATCT<sup>TTTC</sup>TGGGCAAGAGGTCGC<sup>TTTG</sup>AGAGAGCTGTCTTGGCCAGCTATACTAGAATCGA  
TTAGGCAGCTAGCTCCA<sup>GAAA</sup>CGATCAGTGAACGCTTTCGTTGCTCACTTAGTTGATGAG<sup>TTTC</sup>GAGAGCA  
TGCATTCTTATCGATAGAAGAGATCCTTCCGT<sup>TAAA</sup>AATATCAGAGAATTC<sup>TTTG</sup>AT<sup>TTTC</sup>TTATTGAGA  
GCTCTTGTAGAGAACGAGTGTCT<sup>TTTG</sup>CA<sup>TTTA</sup>ATCCCTAAGATTCCTCGAAGCTATAGATGTATATGGCT  
CTCAAT<sup>CAAA</sup>GAATTCCTCAGGAATGGTAGAGTGTGTAC<sup>GAAA</sup>ATATCTTGGGAAG<sup>CAAA</sup>TTGG<sup>TTTA</sup>TC  
CTTATGGAATCGCCAAGATGTCTTAGAGGTAATTACGATAGACTCTCTGGTTGAGCAG<sup>TTTG</sup>TGAGAGAT  
TCACAA<sup>GAAA</sup>AGGTTGTGTTGGAT<sup>TTTAAA</sup>T<sup>GAAA</sup>AAGTAGTTGCTCAGGTGAAGCA<sup>TTTA</sup>ATTGCGGGTAG  
GGGAGGGGAAT<sup>TTTC</sup>GAGCTATCGTAACGGGATCC<sup>GAAA</sup>CAAG<sup>GAAA</sup>AGAAGT<sup>GAAA</sup>CGCATAGTGGATCC  
TTA<sup>TTTC</sup>CCAGAT<sup>TTTA</sup>TTGGT<sup>TTTA</sup>GCACATAGCGAACTTCCAGAAGAGATCCCTATAACT<sup>TTTG</sup>TTAGGA

CGGGTGTCTGATGAGGTTTTATTATCATAAAAGAGTTATTGATTAGGAGTTATGTGTTAGTTGTGTAAGG  
GTAGATATTGTTTAAA AATTTTATTTGATTTAGCCTTATTTTTTAGTTTGTA AAAA GAAATTTTTTTTGTG  
AAGACTCACGATCTCGCAGATACTTGGCAGCTATATTGGTCGACAAAAGAAATCCATCATAGGGATGTTT  
TGATCGAATCCTACCTTCC TTTAGTAAAGAATGTAGCGCATCGGCTTGCTTCAGGAATGCCTTCTCATGT  
AAA GATGGAAGATC TTTATGCTCTGGGGGTTGAAGGGTTGATTCGTGCTGTGCAACGT TTTGATCCAGAA  
AAAAGCAAGCGATTTCGAGAGCTATGCTCTTTTATCA TAAAAGCTGCGATTATTGATGGATTGCGCAAAAC  
AGGATTGGGTACCACGCAGTGTTTATCAAAGAGCCAATCGATTAGCTGATGCGATGGATTC TTTGAGACA  
GAC TTTAGGTAAA GAACCTACTGATGGAGAAC TTTGTGAGTATC TAAAATATTTCAACAAGAGTTATCC  
CATTGGT TTTCTCTCTAGACCTGCTCTAGTTC TTTCTTTAAA TGATGATTTCTCCTGCCAAGATGACG  
ATGAGGGGCTTGCTTTAGAAGAGCGCATAGCAGATGAGCGAGCG GAAACCGGATACGATGTCATCA GAAA  
AAAAGAAGCTAT TTTCTAT TTTGACAGAAGCTTTGCTGGCTCTTGATGAAAAAGAGCGGCAGGTTATGGCT  
CTTTATTACTATGATGACTTGGTAT TAAAAGAAA TTGGGAAGAT TTTAGGAGTGAGCGAGTCCCGAGTTT  
CTCAGATACTC CAAAGCTTTATTTGAAGTTACGAGGTACATTGTCCAGTCTGC TTTAGTAACTGTCTCC  
AGAAGATCCTCTGTATT TTTCTATCAATATTCTATTAGAGAAGCGCGTCTGTTTT TTTGACGAGGTGT  
CTGCTATCGCTTGCTTGCTATAAAAAGAACAGGATAGATAAGATGTTGCTAGATAAG TTTATATGGATA  
GATT TTTATGCAACAGTTAATCGATAACCTTAA GAAACGGGGTATTCTAGATAATCTTCCGCAGGATTA  
GAAAG TTTAACAGTTCCTGTTTCTGCCTATTTAGGGTTCGATCCAAC TGCGCTTC TTTACACATAGGAC  
ATTGATTGGAA TTTGTTT TTTGCGTCGATTAGCAGCATATGGAATCACTCCTGTGCTCTTGTGGCGG  
AGCTACCGGAATGATCGGAGATCCTTCTGG TAAAAGTGTGGAGCGTTCATTACTAGATCAGGCACAGGTG  
CTTGATAATAGTAA GAAAATAGCGGCTGCTCTTGTAGCTATCTTCTGGTATCCGTATTGTGAATAATG  
CGGATTGGCTAGGATC TTTAAGTATGGTGGATTT TTTAAGAGATGTTGGGAAGCA TTTCCGTTTAGTTT  
TATGTTAGC TAAAAGACGTAGTGAAGCAGCGAGTCTATTCTGAAGAGGGAATTAGCTACACTGAGTTCAGT  
TATTTATTGCTGCAGTCTTATGAT TTTGCACATCTC TTTAAAAGAGCATAATGTTGTATTACAGTGTGGAG  
GGAGTGATCAGTGGGGGAATATTACTTCCGGGATTGATTATATCCGTGCAAGAGGACTAGGGCAGGCTTA  
TGGTCTAACCTATCC TTTGCTCACTGATAG CAAAGGGAAGAAA ATAGGGAAGACGGAGTCTGGAAC TATC  
TGGCTGGATCCAGCGTTAACTCCTCCTTATGAACTATTCCAATA TTTCTACGCTTGCCAGATCAA GAAA  
TCTC CAAAGTAATGAGA ACTCTTACTCT TTTGATAACGAAGAAA TT TTTGCTCTTGATGAGCG TTTGAC  
TAGTGATCCACAAGCTGTGAAGAAA TACATTGCGGAAGTGATCGT TAAAGATGTTTATGGTTCTGAAGGA  
TTAGCTCAGGCTCAAGCCGCAACC GAAAGCTTT TTTGCTAGTAAGG GAAAGAGTATTACAGAAGCAGAAC  
TAGTAGCGTTAGTAGAGTCAGGTGTTGGCGT TAAAAGTAGCTCGAGCAGATTTAATAGG GAAACGCTGGTT  
AGATATCGTTGTGGA ACTAGGCT TTTGTTCTCAAGAGGACAAGCTAGAAGACTCATTCAACAGCGAGGT  
CTGTACATCAATCAGGAGCC TTTGCCGATGAACAGAGTATATTAGACGGGACTCAGTTGTG TTTGATC  
GTTATGTT TTTGTTGTCCCAAGG GAAAAGAAAAACAAGTGATAGATCTTAATTAGGAGGGGCTGTGGC  
TC CAAA TACAGATATTGGGTTGATGG TTTGGCCGTGATGGG CAAA AACCTGTATTGAACATGGTGGAT  
CATGTT TTTCTGT TTTCTGTCTATAACC GAAGTCCGGC GAAAACAGAAGAGTTCTT GAAAGATCATGGAG  
AGAGTGGAGCTCTGCAAGGATTTA CTACGATTCAAGAG TTTGTTCAATC TTTGAAGCGTCTCGTAAGAT  
CATGATCATGAT TAAA GCGGGAGCTCCTGTTGAT GAAATGATTGCCCTCCCTGCTTCC TTTCTTGGAAAGAG  
GGAGATATTCTCATGATGGGGGAATAGCTATTA TTTAGATTCTGAGCGACGCTATGTCGACCT GAAAA  
AAGAAGGAATTCTA TTTGTTGGGATGGGAGTCTCTGGAGGGGAAGAGGGGGCTA GAAAAGGGCCTTCCAT  
TATGCCCGAGGGAATATAGATGCTTGGCCTGCAATCGTCTCTATC TTTCAATCCATAGCTGCTCAGGTG  
GGTGGACGACCCTGTTGCTCTTGGATTGGCACAGGAGGTGCAGGGCAT TTTGTTAAGGCTGTTCACAATG  
GGATCGAATACGGGATATCCAGTTAA TTTGT GAAA CATATGAGATTCTTAAGACTCGACTTAATCTCTC  
TTTAGAGCAGATAGGGAATATCTTT TTTGAATGGAAT CAAA CCGATCTGAATAGCTACCTCCTTGAGCA  
GCAGCGCCGT TTTAATAG CAAAAGATGAGAATGGCAATGCGATTGCTTCTACGATTCTTGATGTTGCTG  
GACAGAAGGGGACTGGGCGTTGGGTGCGAGAGGACGCTATTAAGGCAGGCGTTCCATGTCCCTAATTAT  
TGAATCGGTCTTAGCTCGATAACC TTTGACTTG GAAA GAAGTGC GCA CAAAAGGCAGCTCAAGAG TTTCCA  
GGGATTCCTCTTCTGTCAACCTCCACAAGAAGCTTCTGCCTTCATTGAGGATGTGCGAGAGGC TTTGT  
ATGCAGCTAAGATTATCAGTTACGCTCAAGGATTTATGCTGCTGAAGCAGGTCTCTCAAGTAAA GGATG  
GGATCTGAA TTTAGGTGAGTTAGC TTTGATATGGCGTGGGGGTTGCATTATA CAAA GTGCCTTTTATGAT  
AAAATTCATCAAGGT TTTGAAAATAGTCCAGAAGCACACTC TTTGATATTACAAGATTAT TTTAAA AAGG  
TTCTG TTTGATTCA GAAA CAGG TTTCCGGCGAGCTGT TTTGCATGCTATCGGATCTGGTGTAGCTATTCC  
TTGCTTATCTTCTGCACTATCTTT TTTATGATGGATATCGTACGGTGGATTACCC TTTATTCTTAGTGCAA  
GGATTAAGAGATTAC TTTGGAGCTCATGGTTATGAGCGTCGAGACTGTCTCGAGGGGAGT TTTATCATA

CGGATTGGCTAGAAA CCAAGAAA ACTTTTAGAGCA TAAAACAAGAAGGCCAGTAAACTACTGGGTCTTT  
TTTATGAAGCAATATAGCTAGAAGTAGTCTACTCCATTTTAAGGACTTCAA CAAACGCCGTGTTCGGAAT  
GGATACTTTTCGGAATTC TTTCATTCGTTTC TTCCCTTTTTTC TGTTGTCCCACAACTTGCGT TTTC TT  
GTGATATCTCCACCATAGCACTTAGCAGTTACATTTTTCGCTAAA GCTCGAATCGTCTCTCTGGCAATAA  
TCTT TTTATTGATGGCCGCTGAATAGGGATTTTAAA AAGCTGAGGAGGATAACATCTACGAG TTTC TC  
GCAGATGCTTCTGCC TTGTGATTCTGC TTGTCTCTGTGTACAAGGCAG GAAAAGGCATCAACAGCCTCA  
TCATTAATTAGAA TTTC CAGCTTAATGATAGACCCTTTTATAAATCTCCTAACCGTAAT CAAAGGAGC  
CGTATCC TTTCGTCACAGA TTGTAGTTTATCATT GAAATCAGAAA CAATCTCATTGAGAGGCAGCTCATA  
T GAAA GCACCAGTCTGTGTTGGTCAAGCATATCTGTT TTTAGACAGATCCCACGCTTATCCATA CAAAGG  
CTCATAAATATTGCTGAGATACTCTTGAGGCGTAATGATATTAACATGGACCCAAGGCTCCTCCATGTGTT  
CAATAAGAGCTGGGTCAGGATATGCTGTTGGGTTATCAA TAAA AAGGGT TTGTCCATTT TTTAAGACGAC  
TTGTAGATAACGCTAGGAGCTGTAGCAATAATATCGAGAT CAAA TTCTCTAGAGATTCTCT CAAAGATG  
A TTTC TAAGTGCAGCAGTCC TAAA AATCCACAGCGGAACC CAAATCCGAGAGAGTGACTGCTCTCTTGT  
CAATCGTAAGAGCTGAGTCGTTTAGCTGCAACC GGCTAGAGCATC TTTCAGGGTAT CAAAGTCAGAAGA  
ATCTATAGGATAGATAACCAG CAAACACTACAGG TTGTGATTTCTTTAAAGCCTTC TAAAGGCTC TTTAGCA  
GGATG TTTAACAGTAGTGACTGTATCGCCAATT TTTACATCC TTTACTTTT TTTAGGTTGGCAATGAAGT  
ATCCCACTTGTCCGGCTCGTAAGGATCCTTCCATGAGAGTAGCTTCCGGTAAAGAAA GCTCCTATTCCATA  
GACCT CAAAAGAGGAGCC TTGTGTTGCCATGAAGTAATGCGATCTCCCTTT TTGTGATTTCTCCACTGATC  
ACGCGTACATAAAA CCAATGATTCCTACATAAGGATCGTAGTGAGAAT CAAAGAT CAAAGC TTTAAGTTCTG  
TTTCCTGTGGAGGT TTGTGTTGGGGAAACGAGTCGTATAATAGACTC TAAAATTTTCAGGGATACCTTGACC  
TGT TTTCGCTGAGCAAGCAATGGTG TTGTGAAGTATCTAATCCGATGAACCTTCGAT TTGT TTTT TTTATA  
GCTTCTGGTTGAGCAGCAGGTAAGTCTAT TTTATTTAAA ACAGGAATGAT TTTCTAAA TCTCGTCTAGAG  
CCAGATATA CATTAGCTAAGC TTGTAGCTTGAACACCTTGGGCAGCATCTACTATAAGCAGCGCTCCTTC  
ACAAGCTGCTAGTGATCGGGATACTTCATAAGAG GAAATCTACGTGTCCAGGGGTATCTATTAGATTGAGT  
TCGTAAGTCTCCCTTCGTATTCATAGGTCATAGTGACCGGATGCGC TTGTGATGTAATCCCGGTTCTC  
TTTC TAGATCCATAGAATC TAAAAGTTGTTCCGCGCATCTCTC TTGTTCGATAGTACTAGTAC TTTC TAA  
CAAACGATCTGCGATCGTAGATTTCCCGTGGTGCATATGAGCAATGATAGAAA AATTACGAATGTTCTCA  
ATTTTATACGG TTTC AATGTT TTTAACCGAGTT TTGTCTTC GAAAAGGACATGTTAACGGAATTGTGAGT  
TGCTATCTAGAGAAA AGTAATCTAGATCTAGAAGAG TTTATAAAA AAGGCGAGGGGATTTTTGAACACA  
AAAGAAAAGCCCCGTCGAGATAGAACGGGGCTTCTTTTAGAGAA TTTTAGAAA GTCTTATTAA GAAA  
CACCTTCTATAGCAGGAGCGGATTC TTTAGCCGCAGAAGAAGCTTCTTCTCTGCTGCAGCTTCTGC  
TAATTCCTGTTCTTTAGCAGCGGATGCAGCCAAGAACAG TTGTGTTTAG TTTAGTTGCAGATGTCAACCAG  
ACCATGATAATTG CAAAAGAGAGCAACAGCTAGGAATGGAGTCATAGCGCCGATGCTTCCG CAAAAGACCA  
AGAGACCTTGTGGAT CAAAGATCCCCAGATTTTACCGAATCTAGCGGCAACACGTC AATAGCAGC TTT  
CCCTTTA ACTTTTGTCTTTGATCCAATGGGATGTAAGCCAGCTC TTTAGTTGCAT CAAAGAGAGCATAT  
TTAGTTGATTTGGAAA GAATATTTTGAATGGCTCCGACAACAACGGCTAGCATTAGTGGTGTGTTCCCA  
AAGCAGCAACTAAA CCTGTAGCATGATCTCTGAAGATAACGAGAG CAAA GAAGACAGCTCCTGTTACGAG  
AACCATGATAGGTGTAAC CAAA GCTCCAGTTAACCAACC GAATCTACGGATAACGTTACCACCGATGAAG  
AGCATTACAAA TACAGATACAACTCCTGTCCA GAAA GAGAAGTCCCCA TAAATGCGCTGTAGTCA TTTG  
GATTAGGGAATTGCAT TTTGAGTTGGCT TTTC CAAGTTACTTCAACGAGGTTAATGCAGATTCCGTAGCA  
AATAACTAGAAGAGCTAGAAGAAGCATATAAGGAGATCTTAACAGATAAGAGAAGC TTTCGCCCATGCTC  
ATCTTAGG TTTAGA TTTC TTAGC TTGTAGCTCTGCAGGATTGTAGAATCTAGGATCTGTAAGCACGTAGC  
GGTTCATCCACCAGTAGCAAGCAGCAATAATAGCGCAAGAACAAGAACATAGCCATTAG GAAATAGAG  
GCTGACTCCCATGGGTCAACGCCCTTCGCCAAGGCTAGCACGTAA TTTAGAAGACCAGATAATAGCTGGA  
CCAGAA TTAAGAGAGCTACGTTAGCTCCTACTCC GAAAAGAGCGTAGAAA CGT TTTAGCTTCGTAATTT  
TAGTAATTTTCATTGG CAAAAGCCCCAGAACAT CAAAAGAGAGCATAACGCTTCCC CAAA GTTCAGAAA GCAC  
GTAGAACACAG CAAA GTGCCAGTTGCGTAGCATCGCAATGAATCCCA TAAATCCGGAAGGAAGAATGGAT  
TGTAGAGTATCAGC GAAA GCTGTTGGGTGAAGAATATGACGGCAAGGGTAGATCACCACAGGGAACAGTG  
CGAAGAATACAACGAATGGTGAGAGCACTGCGAA GAAAAGAGCCTG TTGTGTT CAAAATATTGCTTAGCTT  
GGCGTAGATCAGCATGAACACAACAGCAGAAGGGACGACTAGCCACA ACTTAAT GAAA GGAATGGCCTCT  
GCTCCAGATCCCGGTGCTGTAACGATAAGAGTATCT TTTGTATCTCT CAAAATCGTGTAAATTGAAT GAAA  
TACAGAAGAACATTAGGAACATTGGCAGAAC TTTC TTCAGCTCATGCATGTGTATCGGC CAAAG GAAAGA  
GCGCAAT TTTCCAAAAGGTTTTTC CGCGG TTGTAGTCATATTTTC ACCCTCT GAAAAGCTTATGTTTATTG

TTAAGT TTTCTTTG TTGAT CAAA TCAACGAAGA TTTAAAGTAT TTTCTTTAAAAAGTCGT GAAAAAAT TTT  
GAT TTTACGACTCCCTA TTTCCGGCTGAATCTTCGATTACGTGAGGAGGAGATGCCCTCCACTCAAGGAGC  
CCAGGAGGGCGGAA TAAAAAATGGCA GAAATCCAACC TTTAG GAAA AGAGTATAACCAC CAAAAGGTCCTCGG  
AAGGCAATA GAAAAGGGCTGTATGCTGAACAAGCAGAAGGGTCCACTGAGAATGAGCCTCTGAGAAA AAA  
AAGCT TTTAT TAAAAAAT TAAAAAAGAC TTTACAAA ACTTATCTGTAGGTTGA GAAAAGAGCTTCAACG  
TAAGCATT CAAAAGCTCCGTACTTACAATATTATTGCGGATAGAGCGAATTAAT TCTCTTTT TTAGTGATG  
GAAGAGGTTTTTTGGGCTGAAGCGAGC CAAAAGATC TTTATCGCCAAC TTGACGAGCTAACTCTAACAC  
CCGTTCGATATCGGTT TTTGT GAAA TTCACAAA GTCTCTGCGCTT TTTAGAACCTCGAGGAGCTCGTGGT  
TTAGGGCTAATGGATCTGGGAGTGATAGAATCGATCA CAAACGTC TTTAACATT TTTAACAGTTGCTCAG  
GAGCAGAGTTCTTCATTTTT TTTAAAG TAAAAATGGTGCATGTAGCCGCCTGTTGGCCCTGGGAGATAACG  
A CAAA GATCAT TTTCTTTACTTCTCCGACTTTG CTAATCGC TTTAGTTATGAGCTGCTCTA TTTCTTCT  
TGGATAGTAATCTGTGCCGTAGCCATGAATAGCTCCTTAGTGGGTAGTCTAGTTCTACAGATGGTAGTT T  
TTGC TTTATTAATTGTAATAGTCAACTAAGTCTGTTTT TTTTCGA TTTAATGTT CAGTC GAAATAAAA AATC  
AATTAGTGT TTTATCT TTTGGTGAATTCTATAGTGGTT TTTGCTTT TTTTCGCAATCTCAT TTTAGAGATTT  
TTTGAT TTTGGACAAAA GAAAATGAAGTACTTCAGATTGT TTTCTAAG TTTGTTTG CATAAA CAGCCATCA  
TTTTTATGCAGGTTAGTAGCAGAAA TCTG TTTGGAACAATTTTACT TTTCTTCAGACTCT TTTATAGTTGT  
TTGCTTAGAAAACACGTATTAGTATGCATTTTTCT TTAGTTGT TAAAATTATTTA GAATTGTCTCTTCGAG  
ATGA GAAA CGCGCTAGAT TTTCT TTTCCGGTTGAGAATA TAAA TTCATCCTGT TAAAAGTATCTTCGCGAT  
AAGCGAGGTTCTT TTTGTGGAGGGGGAGCTCCTTACAGGAGGCTTGTATCC TTTAAAAATAGAGTT TTTCT  
TATGACCCCATGTGGCGATAGGCCGGGTCTAGCGCCGATAGTA GAAA TATCGGTTGGTT TTTGTCCTTGA  
GGGATCGTATACTT TTTCAAAA GTATGGTCCCCGTATCGATTATCTGGAGGCTCTTATGTCTTTTT TTTCA  
TACTA GAAAATATAAGCTTATCCTCAGAGGACTCTTGTG TTTAGCAGGCTG TTTCTTAATGAACAGCTGT  
TCCCTAGTCGAG GAAA TCAACCCGCTGATGAGAGCATCTATGTCTTGTCTATGAATCGCATGA TTTGTG  
ATTGCGTGTCTCGCATAACTGGGGATCGAGTCAAGAATATTGTTCTGATTGATGGAGCGATTGATCCTCA  
TTCATATGAGATGGTGAAGGGGGATGAAGACCGAATGGCTATGAGCCAGCTGATTT TTTGCAATGG TTTA  
GG TTTAGAGCATT CAGCTAG TTTACG TAAACAT TTTAGAGGGTAACC CAAAAGTCGTTGATTTAGGTCAAC  
G TTTGCTTAACAAA AACTGTT TTTGATCTTCTGAGTGAAGAAGGATTCCCTGACCCACATATTTG GACGGA  
TATGAGAGTATGGGGTCTGCTGTG TAAAAGAGATGGCTGCGGCATTAATTCAACAA TTTCTCAATATGAA  
GAAGAT TTTCAAAA AGAATGCGGATCAGATCTTATCAGAGATGGAGGAACTTGATCGTTGGGCAGTGCCT  
CTCTCTACGATTCCT GAAAAAATCGCTA TTTAGTACAGGCCACAATGCGTTCAGTTACT TTTACTCG  
TCGGTATCTATCCTCTGATGCGGAGAGAGTGTCTGGGAATGGAGATCGCGTTGCA TTTCTCCAGAAGG  
TTGTCTCCTGAGGCTCAGATTAGTATCCGAGATATTATGCGTGTAGTGGAGTATATCTCTG CAAA CGATG  
TAGAAGTTGTCTTT TTTAGAGGATACGT TAAATCAAGATGCT TTTGAGAAA GATTG TTTCTTGCTCTAAGAG  
CGGA CAAAAGATTCTGCTCGCTAAGTCTCC TTTA TATAGCGATAATGTCTGTGATAACTAT TTTAGCACG  
TTCCAGCACAAATGTCGCACAATTACAGAAGAATTGGGAGGGACTGTTCTTGAATAGAGATAATGCAATT  
GCTTGGTCCGTAGAGGATC TTTGTGTTAATTATGATCACTCAGACGTTCTTATGTACATTACTT TTTCTC  
TGCCGTCAGGGGCAATGGCTGCTATTATTGGGCCGAATGGAGCTGG TAAAAGTACT TTTGCTTAAGGCTTC  
TTTAGGACTGATTCGTGCTTCTCTGGC CAAA GCTTGTCT TTTGGT CAGAGAT TTTCAAGGCACATCAT  
AGAATAGCCTATATGCCT CAAAAGAGCGAGTGTGGATTGGGAT TTTCCAATGACTGTTCTTGATCTCGTGT  
TGATGGGGTGTACGGCTATAAA GGAATATGGAATCGTAT TTTCCACTGATGATCGTCAGGAGGCTATGCG  
TAT TTTAGAGCGGGTTGG TTTGGAAGCT TTTGCAAA TCGT CAAA TAGGTAAGCTCTCTGGAGGACAACAA  
CAGAGAGCTTT TTTAGCGCGGTCA TTAATG CAAA AAGCAGAT TTTGTATCTCATGGATGAGCTGTTCTCTG  
CGATCGATATGGCCTCTTATCAGATGGTTGTAGATGT TTTGCAAGAGCT TAAAAGCGAAGGGAAGACTAT  
TGTGGTCATTCATCATGA TTTGAGTAATGTCCGGAAGCTTTTTGATCATGTGAT TTTAT TAAA TAAGCAT  
CTTGTGTGCTCTGGAAGCGTAGAAGAATGCTTGAC TAAAGAAGCCATT TTTCAAGGCTTATGGGTGTGAAC  
TTGAGCT TTTGGATTACACACT CAAA TTGTCTAGAGGCAAGTACCAAGGATCGTGCTAGATGCTGAGTTG  
TATA TTTCAAGGACACTATC TTTCTATCCAGTTT TTTGGCAG TTTGCTGATTTG CATGACGACTGCCTTG  
TGGGGACTATTCT TTTAGTTGAGAGACAGCCCTTATTAAGTGAGAGCC TTTCTCATGCTTGTATCCAG  
GGCT TTTAATAGGTGCCCTTC TTTCTTA TAAA GTTCCCTGCAT TTTCA GATTCT TTTGTGGGTATTATCTT  
TTTTGTTGCTAGCTTCTGTCTTGGGATGTTTAGGAATCTCAT TTTAGAAA GAAA TTAGCTATGCAT  
AAA GATT CAGCT TTTATGTTTAGT TTTGGTTTCATTT TTTGGCGTAGGGGTGATTCTTGTTAGTTACGT CA  
AAGATTGCTGCCCTCT TTTATACAACAAGATTAATGCATATTTG TACGGCCAAGCGGCGAC TTTAGGGTA  
TACAGAAGCCAAGCTTGCATTGATCATT TTTGT TTA T CAGCTGTAGTGTGTTGGTGGTACAGACAA

ATTC TG TAGCTATT TTTG ATAGAGAA TTTG CGTATTCCTGTGGATTAAGAACCGGTACAGCAGAACTCG  
TTGTTCCTCGTATTTATTTTCGTTGGTCATAGTCAGTGGTGTGCGTTCCTGTAGGAATCTACTCA TTTCTGC  
TATGTTCTGTTGCCCTCC TTTA TCTGCCAGACAGC TTTCCGGATAGATTAAGTACAATCTTAATCTATCG  
AGTATT TTTGGGGTATTTGCGGGC TTTAGGATGCTATT TTTCCGTAGCTTTCACTTGTCTAGACTGTAG  
TGGAAGGGAAGCCTATATCGATTATCTTCTACAGGACCCTGTGTGT TTTCTTCGCGGGAGTGCTAGT  
TTTC TTATG TTTAATTT TTTCATG GAAAACAGGGTGGATCACTCGCTA TTTCCGAAG GAAATGGTCTTA  
TTTC TCGAGATGAAGAACATCTATT GAAAATCT TTTGGTATTTA CGAGAA CAAA ATACCTATCAAGTAG  
GTGTGAGAGAT TTTG TTCGTTCTA GAAAGTACCAAGAGTAT TTTG GTGATAAGGTA TTTCCAGATTTAG  
GATGTT TTTACTGTG TAAA AAGGGATTAGTCTCCTGTTCGGAACATCAATGGTC TTTAACAGATAAA GGA  
TTAGCTAGAGCTGC TAAA ATTAGTGCGTGCTCATCGAC TTTGGGAATCTTATCTGGTGAGTCAGTTAGGT  
TTAATAAGAACGAAGTACATCA TTTCCGCGAA GAAATGGAGCATGT TTTGACAGATGAATTAGATTCTAC  
TCTGTCTGAGATGTTGCAAGATCCTGATTACGATCCGCATCAGCGAGAGATTC CAAAACGAACAAGGAAG  
TCGGATGGTTGCTAGTA TTTCTCCGTA CTACGGAGTATCATT TTTAGAGTTTT TTTCTAGTCTTTT TTTCC  
CGGCTTT TTTCTGGGAAGCTGT TTTACGATCA TTTGTATATCGATGACATTCAGGTGATCGTGTTC TTTG  
CAATAGCAG TTTCTTGTCTGTAGTAGGGACTTT TTTAGTGCT TAAA AAGATGGCTATGTATGCGAATGT  
AG TTTCCATACTATATTG TTTGGTGGTCTGTGTCTG TTTATTTA CTATCAGCTCATTCA TTTATCT  
ATGCAAGCATTGACTATCGCTGCAGTCTCAACAAC TTTACTGACCGGAGCATCCATTCA TTTTATTCGGA  
ATGTA TTTAAGGTAGCAGAAGAAGCAAGCACAGC TTTAGTCT TTTCTCTCTGT TTTCCAGCTAG TTTATT  
ACTGCTTGTGTT TTTGACTCGTAACGCGCATGTAGGGACCAGCTTGTCTATTGGTAATGCGGATGC TTTA  
GCTAAAACAGATATTCTCCCTATATT TTTAGT TTTA TTAATTA ACTTGGGTAT TTTCTACTGCTTT TTTCT  
CAAGT TTTGTTTG GTATCT TTTG ATACGATT TTTGCT TTTCTTTAGGTATTGAGTCCGCTCTGTAGA  
CTATCTCGTTATGCT TTTGCTCTCAGCTTCTATTGTTGGAGCT TTTAAAAGCGGTTGGCGTGTGATGTCT  
TTGGCT TTTCTACTCATTCCCTGGGTTGATCG CAAAATTGATAGCCTCTTCTGTCAAGAGATGATGGTGT  
ATTCATGGTT TTTGGAGG TTTGGCAGC TTTGATTGCCCGGCTC TTTCTAGATCCATTCTTTCCG TTTA  
CGGAATCGGCTATCTACTTTCAGGATTAGCTGTGCGTCTACTACTTGTGT TTTA TGTAGTTATGTTAGTG  
TTCT TTTGTTCTAAAAGGGCTATTATGCTCCGT CAAA AACTTGATAAGTAAGGCAATGTAGAGAATACGA  
GGTCT TTTGAAGCA TTTAGCACTGATTGGGTCAACAGGGAGTATTGGTAGACAGGT TTTACAAGTAGTT  
CGTCTATTCCCGATACT TTTA TTTATA GAAA CTCTTGTCTGCGTATGGACGGAATCAAGAAGCATTGATCT  
CTCAGATTAGAGAG TTTAATCCTCGAGTGGTAGCCGTTCTGTGAAGAAA CAACTTACAAGGAGCTCCGTAA  
GTTATTCCCTCATATTGAGATTCT TTTAGGAGAAGAGGGGTTAG TTTCTGTTGCTACAGAACCCTTCTGTA  
ACAATAACCATTGTAGCTTCTGCTGGTATAGATGC TTTACCAGCAGTCATTGCAGCTATCCGACAGAAA  
AGACAATAGC TTTGCTAATAAAA GAGTCGTTAGTGGCAGCTGGAGAGTTGGTTACCAC TTTGGCTAGAGA  
GAATGGTGTGCAGATTCTCCATCGATAGTGAACATAACGCAC TTTCCAGTGCTTAGAAGGAAGAGAC  
TCTTCTACCAT TAAA AAATTATTGTTAACAGCTTCTGGAGGGCCGTTAAGGAA TAAAT CAAAAGAAGAAT  
TACAAAAGGTCTCTTTACAAGAGGCTTTCGACACCCTG TTTGGAATATGGGGCC CAAAATTACAGTAGA  
TTCTTCTACCTTAG TAAATAAAAGGCTTAGAAA TTATAGAAGC TTTCTGGCTATTTGGGCTGGAAGCTGTA  
GAGATAGAGGCGGTGATCCATCCT CAAAGTCTTGTTCATGGAATGGTGGAGT TTTGTGATGGAACGATCC  
TTTC TGTGATGAAGCCTCCAGTATGCTA TTTCAATACAACATGT TTTGACTTTCCAGAACGTAGCCC  
TGCAATAGGTCCAGGATTCGAT TTTCTTTCAAA TCGCACTCTAGAGTT TTTCCGATAGATGAAGATAGA  
TTCCCTAGTGTT CATCTAGCGAAGCGAGTGCTTCTT GAAAAGGGGCTATGGGGTGT TTTCAATGGCG  
CCAATGAGGCTTTG GTTCATCGATT TTTAGCAGGCGAGATTTCTTGGCAT CAAA TAGTCTTAAA TTACA  
AGCTCTTGTGGATCAGCATCGCGTCAATCCTGT TTTATCCCTGGAA GAAATTTATCGGTAGATGCTGAG  
GCCAGAGCTCGTGCTCAAGAGTGTAACTA TTTCTATGTTCTGTTGGATGTCAGTT TTTCCGATAGTGGTG  
CG GAAA AAAACGATTCGTGTAGTATAGGGACGGCTC TTTGT TTTG TTGAGCGTCTTATAGTATCTTAGGC  
TTCTGATAGAGGCTTGTATAGCAGCTGT TTTAAGTAGAGTATAGTCTGGCTTAGAA CAAAGATCATTCA  
GGTATATAGAGTATGACAATAATATAT TTTGTTCTTGCAGCCCTGGC TTTAGGT TTTCTGAT TTTAATTC  
ATGAACTTGGCCA TTTAATTAGCAG CAAAAGCTGTGGAATGTCTGTAGAGAG TTTCCAGTATAGGG TTTGG  
CCCAGCTCTTGTTC GAAAGAAA ATAGGGAGCGTTGAGTACCGGATAGGAGCGATTCT TTTGGGGGATAT  
GTTTCGTAT CAAAAGGTATGGATAGAAA TGA TAAA GACAATTCTGGAGA CAAAAGAAA ACTGTTTACGATA  
TCCCAGAAGGCTTT TTTAGTAAGTCGCCTTGGAAAGCGATT TTTGTTTTAGCCGAGGCC TTTAGCTAA  
CCTACTTGTGGCTATA TTTGT TTTCCGGATTCTCTATT TTTCTGGTGGTAGAA CAAAATCAT TTTCTGAA  
CACACCAGCATTGTAGGTTGGGTGCACCCTTC TTTGGAGCAACAAGGCTTACATGCAGGGGATCAGATTT  
TCT TTTGTAATGGGCAGCCTTATTCTGGGCATAAAATGGCTTT TTTCTATCTTCTCTTCTT GAAAAGAAAGCT

ATCGTTGCAAGGGCAGCATCCAGCCTACTTTTC TGAGTCCGAGGCTTTTC ATTAGAAGCACCGTTTAAT  
CCTGATATGGAAGGAGTTCCTTGTTTAGGAGCTAGTTATCTGCTGTATCGAGGATCCGATCCTTTACCTG  
AAAAATCTCCTTTA GTAGACGCTGGATTGTCTGAAGGAGATCGTCTAGTATGGATGGATGGGTGTTAGT  
CTTTTC TGGAGACAAGTTTCT CAAA TGCTCAATGAAAAGCAATCCTTTTGGAGGGTTGAGCGTCAAGGG  
AAGGTGGTGTTTG TTCGTCAAGCTAGAGTCTAGCGGGAGA TTTA ACTCTCACTCCGTATTTTAAA AACG  
AACTCATAGATTGTCAGTATGAAGCAGGTCTTAAA GG CAAA TGGGCTTCATTGTACATGCTCCCATATAT  
TATTAATGGGGATGGT TTTGTT GAAA GTAAGGT CAAA CTGCTCAACAATGAGCGGGTATCTTTG GACTAT  
AATCTAGAGTTAGGCGA CAAA ATCGTAGCCGTTGATGGAATCCCTGTCATGAGCAATGCGGATATTTTAC  
GTCTTGTTC AAGATCATAGAGTGTCTTTGATA TTTCAA AGGATGTCTCCAGAGCAGCTGACTGT TTTAGA  
GCAGAAGGCTGCAGATCAGGCA TTTA TTAATTCCATGATATGGACGATCTTCTACGTGTTGCAGAGTCT  
GTTGGAGAGGAACGTGAGGTATCCCG TTTAGGGGATTATCG TTTG GTAACACGGGTGCAGCCTAGACCTT  
GGGCACATA TTTA TTCTGAGGCGTTGTTGGA CAAA CAGCGAGCTCTTGCATCCAAGTTCGAGATGAACA  
AGAGAGACGTTATTATCTC GAAA GAATAGAAGCC GAAA AACAGCGGA TTTCTTTA GGCATTCCCCTTAAG  
GATCTAGCCGTT CAGTACAATCCGGATCCCTGGGTATTGATGGAGGAATCCG TTT CAGACAGCT TAAA GA  
CTGT GAAA GCCTTGGGGATGGGGCGGGTGAGCCCTCAATGGCTATCAGGACCTGTAGGAATTGTGCGTAT  
TCTCCATACAGGATGGTCTGTAGGGATTCCCTGAGGC TTTGGCTTGATCGGGTTGATCAGTGTAAA CCTA  
GCAGTGTGAATCTACTTCCATCCCTGTATTGGATGGCGGTTATATACTTTTG TG TTTATGGGAGATTC  
TTTC CAGACGTCGAT TAAA ATATGCGGCTCGTTG GAAA GCTCTTGTCCC GTTTA TGATTCTATTGGTCCCT  
ATTT TTTG TATTCTTGACCCTCCAAGACC TTTTC TAGAGT TTTTC GTTGGGTGATGTTCTACTTTTTGGAA  
CCCG TAAAGGCTATAGGGGTGAGCTCCTAAGCAGTGAATAACGTAGATATC TTTA CTCT TTTCTTTA TTC  
ACTTTG GC TTTA GGAGATTGTTGTATGCTCGCCTCTATCTCTTCTGGACTTGGGTAAGAGCAGAGCTTC  
TACTTCCG TTTTC TTAGGAACCCCTCATTAAAGAATAGGGAGGT TTTG TTCGTAATGATGTATGTGTGATT  
CGCATCAATGATGTAGT TTTG GTGTGGAGTATCTAATCTTG TTTTC TGTTACACAGACCTTGCCATCATT  
TCTTCTCTAATT GAAA CAGTAGAAA CTTACT TTTTC TTAGTTC CACTTAATACGAGAACATCAACAGAAG  
AAGGCATT TTTG CAATGTTCAACATATGCTCAGGGCTATATGTAAGAAGCTGCATACCAAGC TTTTC TGCC  
AAA GA CAAA ATTGCAC TAAAGAGCTTCGGCTATAGCGTCTTGCTAATGTAGACCCTGCATTAGGAGCGCC  
ATAAGACCCT TTTG CCTTT TTTA GCTTCTTCAGGACAATCGGGATGAGCTAATGCTACACGAACAATAA  
CTCCTCCTACGGAATGCGTAAC GAAA TTAATCGGTATACCAGG TTT CAGTTCGCAATCTTATTGAGTAA  
TCGAACAAGATGTT CAGCATGTT TTTTC TAATGTAAA TTTTC GGG TTT C ATAGTTC CAAAT GAAA ACATCA  
TAGT TTTCT TTTTC CAGAACCCGGCCAATAGGT TTTAGCGAACCATAGGATCTTA GAAA CCGGTGAACGC  
ACACAACAGATTCCT TTTCTTCGCGTATCGAGTTCACCCAGCAACCCCTGATGTCAATGTTTGAATCAC  
AGAGGATCAGCTAATAGGGAAGTTC CATTAAATA GAAAGAGTATAGTTAA TAAA AAATTCCTTCA TTTTCG  
CAACACCGATTAATATTAT TTTAAA TAAG TTTGT TTTAT TAAAAACAGGTG TTTATTTACTTAG TTTGTT  
TATGTGATC CAAA CATCTTT TTTATCAA TAAAATAAA ACAACAAA G TTTGTTTC AATTAACAAA CAGTTT  
TGCGAAGGAGAAA TTATAGAGATTGAGGAGCTACAAGGGATACTTGAGCTTGTGTACAT GAAA AATGCA  
GGATGTTGTGCTGCGGTGATCTGGA CAAA TAGTAGAAGTTGTAACCACTTGCCC TAAA GAG TTTGAGAGT  
TGCAGAAGCTGATC TAAA CGCTGTGATCTAGACAAGCATGGATGTCATCCATGCACAGAAGAGGATGGA  
TA CAAA ACTCTTCTTGAAGATACACGCATT CAG CAAA TCGAAGAACGGC TAAA AGCGAATGTT TTTG GCC  
TTCGCTG GAAA TTTA GCAACAGGAAGATCATTGATAGTTAGAAGGAGTTCGTCCCGATGGGGCCCTACC  
ATAGTATAGCCAAGATCGAGGTCC TTAGT TTTG CTATGCGAAGTTGTTTCGTAGTAATTACTCGCTATGT  
CATTGAGGGTAGGGGATTCCCTCTGTAATGAGAGA ACTCTCATAACGAAGAGATAGAGTCTCT TTTA ACGT  
ATTATCC CAAAGAG TTTGAAA GATCGTA TTTA GCTTT TTTAGTACATT CATTGCGTAAGAAGGCTACCAGA  
CTACCATAAGCAATCAATGGGAATTC CATGCA GAAA TAGC TTTTC TGATTCTGAGC TTTA ATAGAAGCGT  
TACGCTGGTC TAAA GC TTTGTGGTAGAGAGAAA TATGCTCGGTGTA TTTATCTGAAGCTTGTGCTAGTAA  
GAGGTCT TAAAAACGACGACGTTCTGAAGGGGAGCCTTCAATAATGCTATGCT TTTGATG GAAA CAAA  
ATAACAG GAAA TAACCCTACTAGCTCAGAGAG TTTTC GTAATAGGAGCTCCGT CAAA CAGGATCTTCTTCC  
CTTT TTTATCCACTTGAATAGAAA GAGTATGAAA AACCTCTTTA TGCGAGAACACAGCTTCTA TAAA AAA  
GTGGGATGCTC CAAA ACGTATGGCATCGGT CAGT C GACTAGTTC GAAA AGACCTACCTAGTGATAGAATG  
TACAGAGCCTCAAGAAGATTCGTC TTTTC CTTGTGCATTAAGACCGAAGATGGAATTCATCTCCGGTCCTA  
ATTC TAAA CGAAGATCTGTATAAT TTTCT GAAA TCCTTAA GAAATAAAGAAA GAACCCGCATTAATCGTCA  
TGTAATCTCATGGGCATGATGA CAAA CAAGCTGCGAGTGGAGTCTGTAATGATTCC TGGATTGTAAGAAT  
CTGAGATACCTAATTGAACAAGTTCATCACGGCTGTG TTTTC AGAATGTCTAAGAAGAA GAAA GGAT TAAA  
GGCTA TTTTC TAGGG TTTCC ACCAGTATAATTGACAGCCATACTTACCTTGCCCTTCTCTACT TTTG TGCG

TTGGCTGTAAGAGTTAGTTCTCCAGGTGAGAAGCTAAATTTGACAGAATGCGAAGACTCATTAGTGAAAA  
GGGCCACTTGTTTGAGAAGGGAGATCAGTTCTTCACGATGTAGATCTAATTGTACACTGCTATGAGTGGA  
GATCACAGGGGAAAAGTCCGGGAATTCACCAAAAAGGAGTTTGTTACTAATAGTGTATTTCCACATTTCG  
ACAGCGATTTTAGTTTGATCTAAAAAATAGTGGATTGAACATCTTCCGAAGACATGCGAATAAATTTCTT  
CGACGGCTTTTGATAGGGATGATATAGTCTCCTGAAAAACTAGGATCTAAAGAAAATCTCTGTATCGATCTT  
AGCTAACCGTTTCCCATCAGTTCCACGACTGTCATAGTTCCATTCGCAATAGAAAGTAAAACGCCAGTG  
AGTACATAGCGACTCTCTCTCTGGATACAGCAAAAAGAGGTTCTTTGGAACATGTCTTTTAATCGCTCAG  
AATCCAGAGTGAACGCAGAGCATTTTGCATATCAGGAAGCATAGGGAATCTTCTTTCCCCATACTTAA  
CAGGCAAAACAGGAAGAACCCGACGTGATTGTCGCCATTTCTCCAGAATGAGCTGCTACTTCAATAATTT  
GCCTCTGTTAACTCACGAATGAGTTGGAAGAATCTTCGAGAAGGGATGGTAACAGATCCAGACTCATAGA  
CCTTTGCTTTTACAACACAACGAGTGCTGACCGTCAGGTCTGTAGCCGTGAAAACCAACTCATCGTTACA  
GCTTTCAATGAGTACATGAGTCAATACTGGAATTGGCGTGCCTTTGTGGAACGACATTTCTGAACTTTTTTA  
ATTAGAATTTCTAATTCATTGCGGGAGATAACGAAATTTCAATTATTTCTGTAAATCATGTAAGTCTGTTT  
GGAATGAATAACCATGTTTGTGACATGGAAGCAAGTAAGTCGTCTCTCGGGGCTAGCTTTTAGTAAAAAA  
TATCTTGACAAAAGACGGATTTGAAAAGCCCCATGAAGGCGGAAATTCACATGGTACTTGTGATTAGG  
ATTATTATCAATGACAAAGGAAGAATCCTTTTAAGGAGAGAGGGGCATACGGTTCCTTTCAAGAAGAAGCC  
CTTTTGTCTATACTCTCCTTAGTTTTTAAGAGGTAAAACATGGGCGTTAAGGAAATTTGTTTGAATCGC  
AAAGCTTTTTCATCATTACGAGGTTTTAGAGACCTTGATGCAGGGATTGTTTAAACAGGAACAGAAATTA  
AATCTCTGCGAGATCATGGTGAAAATTTGGGGGATGCTTATGTGACGATCTCTAAGGGAGAAGCTTGGCT  
ATTACAGTCAAGTATAGCTCCATATCGTTTTGGGAATATCAATAATCATGAAGAGCGCCGCAAGCGCAAA  
CTTCTTTTACATAAGTACGAGATTCACAAACTAGACGCTCGCATTTCTCAAAAAGGATTGACGGTTGTGC  
CGCTTAGCTTTTTCTTTTCTAAAGGATTTGTCAAGGTGCGTATTGGCTGTTGCCGAGGGAAAGAAAGCTCA  
TGATAAGCGGCAGTCTATTATTGAACGAGAAAAGAATCGTGAATTGGCTGCAGCTATGAAACGTTCTTGT  
CGGTAATATATGCGCAAGATGTTCTTATTTGCCAGTCAAGAGCTTCTTGTTTTAGAGGAGAAGTCTGT  
CAGTGCAGTAGCCATAGCATCCGCAAGGCGCAGCTTTCTGTTGATCACGAAAACCTGCAAGGATGGGATGG  
CTGCTATCTTCTAGAGGATTCCCCTTAACGGGTCAAGAATGTGGGTGTAGGTTTTGTGTTCCACATGCC  
ATCGTTGATATTGACTCCCCTCGTCTGCTATAGCATGATCATGCAGATGAAGAATCTCTGGGGTAGCTGA  
TGAAGCGACAGCCCAAGATCTTCCGGAAGGATGTTTCCCTCTGGTTTTGATTTCTCCTCCCATTCTACG  
TAGTAATTTTGACAGAATTGAGCACAAGCTGTTCTAATAGATCTACAGCAAAACCTTTTACAGTTCCGC  
AGAGATCTAATTGGACGAGAGGCGAAAGTTTCTCTAAAGTTTGTCTGGGTTTTATCAAGAGAAAATCAGATG  
CCATCCAGAGCTGTGTTTGTAGAGGTGTTGGAGCTCTTGAAGAAGGATAGTATGGGATTTTAGGTTGCAGT  
AGCCATAAGCTTTTAAAGCGCCTAAGGTGGGATCAAAACGGCCATCAGAGAAGCGTGGAAATGGTCTA  
TTTTCGATAGAAAAGCAAAAGAGTGTCTGGCGATAAGGGATAGGGGTTTGTTTTGTGGTGGCATTAATACG  
GGAAATTTCCGATAGAGGATTCCAATTATAAAAGTTTGATCGATATGATCAAAACCTCGATCAAATTTCC  
TTTTGCGCTTGTGGAATGCATCTGGAAGAAAGTCTTCTCAAAATACAATGCGATAAGGAATTGTCATAC  
GGACCCCTCAAGAGTAGTTCTTGAAGGAGCTGAACAGGATTGGAGGAAGAAGGGGGCTAGGATCAGGAG  
GTATGACGCAAAAACTTTCCCATGTAATTTCTCATTAGCATAGCGACGGTCATTGGGCCGACTCCACCAG  
GGACAGGAGTAATGGCTCGGCAAAACAGGTACAACATTTGTAATAATCGACATCTCTACAAGGATATAACC  
TTTAGGATTCGCTGCAGGGATTCTTGAGGTGCCGACATCCATGATCACCCTTTTTCGCAATCATCTCT  
TTATTTACAAAAGAGCGGTACTCCAATAGCTGAAATGAGAATATCTGCAGTCTAGTGATCTCGGTAAGAT  
GCTCAGATTGGCTATGAAGGAGAGTGACACTAGCATTAGTATCTGCATGCTTTTGCATAAGTAAGGCCGC  
TAAAGGTTTACCTACGATATTGCTACGTCCTAAGATAACAACGTGCTTTCCATGGAGAGGGATCTCATAA  
TATTTGCACAGTCTACAATTCCAGCAGGAGTGCATGGGATAAAATCCATCTGTTCCTCCAAGAAGTAGTT  
TCCTTACATTGACAGGGTGTAGTCCATCGACGTCCTTTGTCAGGGGTGATAGTGAAAAGAAATGGCTTGAGC  
GTCATAATGTTTGGTAGGGGAGTTGAACAAGGATTCCTGGATGTTCTCATCATTATTGAGTTGGTGG  
ATGAGCGCTAAAATGTCGGATAGTGTGGCATCCGAGGGCTTGGGATAGGATTTAGACACCATCCCCAAAAT  
CCGTAGCACGCTTGATTTTCATATTCACATAGATTTCTGAGGCCGGATTATTTCTATCAACACAACAGC  
AAGACCAGGAGCTTTGAGCAGGCTCGGATATTTCTTTGATTGTTGCTAAAATATGGTCAGCTGCTGGC  
GCACCCTTTAATAACATGCACAAATACTTAGTTAAATGGTTTTCACATAGGTTGTTTAGAGGGAAAAGAGTC  
TAGACCTCTCTTGATCAGTTTACAAAAGCTGATGAATTTTAAAACCTAGAAGACTGAAAGAGAATCAGAT  
CTGAGGAGTGAAGACTTTTATGAGCCAGAAGACTGAGAAGCGCCCCGTAAGGTAGATCCACCATGAGA  
ACGTGTTGTAATCGGCAAGAAGGGCTGTGTTATATAGGCATAGAGGGCGATTGAAGAATGCTAGAACGG  
GGTAAGAGAGAAAATAGAACGTTAGGAAAATAGAGCACTGATGAGAGGGAACGAGATCCAACGTTCTTT



AATAAA GAATC TTTG TGT TTTG TACAGGATAAGAGAGGTGCTCACATACAGAAA AGCTTGGATGCCATA  
AAGCAGGTGGAGCCCATATCAGAAA GCAGACCCGAGAGCATAGCC CAAAGCAGCACGCGTTC TTTAGGTT  
GGGAATA GAAAGTAGTGACAAT CAAAGGAG CAAAGTACACTGGTCGCCATT CAGG GAAATAGCGAGGGAA  
TAAGA GAAACTGAC CAAAGAGACTAGGAGTAGAGTGGCTTGGGAGAGATTCT CAAAGAATGT TTTGATG  
AGCGTTGG GAAAGGAATATTGCGGAGAGGAATATAGGCCTCAATGGGTAGTGT CAGCATCGCCGACTA  
TAAAAGAT TAAAATGA TTTACAGCAATATAGAGGGATAACGGCAAGGATTGTTAATAA TTTAATGTTCTTA  
TCAATTGT TTTATGG TTTAT GAAAAACAATTT TTTAATTTAAAATTAGAATAGAT TTTGAAATAAA TTAT  
TCTGG TTTCTGCTCAT GAAAAAAGAAGCAGTCGCAAGCTAGCTCAAGTGATTGGGCGTAAGACGG GAAA  
CTAT TTTCCAGCTTCTATTGAAGGC GAAACCAA GAAAGAGCA CAAACATCATTACAGCACAGCCT CAAAA  
GAAAAGAGTCTCTAC GAAAAAGAGC GAAAGAGTTCGATGTGCTAGTACATT CGTTATTAGAT TAAACACG  
TTCTT CAAAATTCTGACCAAGT TTTGATT TTTACGTACCAGAATGGC TTTGTGGAGACAGACT TTT CATAA  
TTTTGGCGATATTCTGT GAAA CTGTAGTGGGGG GAAAGAT CAAATAAAAAACTAATAAGTGGGATTAA  
CCCAAATG GAAA GACGGGGAGCCTGGGTGTATATATTGGTCT CAAAGACCCGCCAGTAATAAAA GATCTC  
CAAAATC TTTATCACTGAGCGGTTAGGCATGAGTGCCTGCTTGGGGCTACAGAGATGCACT TTTA TTGCAT  
CTACCCGCT TTTCT TTTCCGTCTAACCTATTT TTTG GTTTT TTT C GCAAGGCCAGAGCCTTGGCTTTTT  
TTTGT CCAAATGTT TTTATTCCGATCT TTTGT TTTA TTT CATAATTCAGT TTT CAG TTTAAAATTATT  
ATTACCCATT CATTGGTTTT TTTG TTT TTTAGGAAAAAATCATGTCAA TTTCTGGAAGTGGTAATGTATCT  
CCTGCAACTCCTGAT TTTGACCCATCCATCTTGATGGGAAGACAGGCGGCATCAGCTCATGCAGC CAAAG  
AGGCCTCCGGAGCATCCAAGGCTACG GAAACGTCTGCTGCAGAACAACAAGCGTTAATTAGTTCTGGAAC  
GGAAGTACTATGTCACGGATT TTTG CAG CAAAGCGAGGG TAAATA CAAAAGACCCTCGATAAGACT TTTG  
AAATCTCC TAAAA CAAAAT TAAAAGGGAATTT TTTCCAAAGTACGTGCAGGTAC TAAA GGATTCCCTACAG  
GAT TTTG GAACGCGAGCTTCTCGTAT TTTCTGCTCGTAAGGCAGAAAATAATGGAGAAGGGATGTCTATGAT  
CCCTAGCCAGATGGAATATGTGAA GAAAAAAGGGAATCGGG TTTCTCCT GAAATG CAAAATTT TTTA TCTT  
GGAGCTTCAGGATTATGGAGTCCAACGTCTGATG TTTCTTC TAAAACG GAAAATCG TTTGGGAGCTACTG  
CCCTGTCAACAACCCCTTCATTGACGACTATGCAAGATCCTGTGTCTATAGAGCATCTATCATCTGGAGA  
AATCACTGCATTAGCTTCG TTTAATCCTAATGTTCTGTCAGCTTC TTTGAATGAGCAGACAATTAATGCT  
TGGACAGAAGCTAGT TGGGAGGAGAAA TGG TTT CACTCTCTTAGACCCCAATATTGAGACGTCTTCTC  
TTCTACGTGAGCTCCTACCCTAAGTAACGAAGGGATGGTCGATG TTTCCGATATGG GAAACCAGACTAC  
AAG TTTATCCATGGAAGGATTAG TAAA TACTGTTGTGATGATCCAGCTTCTGCAGAAGAAGAAA AAAAG  
ACTGGAGAGCTCTC TTTGGAAGAGATGGCAGCCATGG CAAA AATGATGGCAGCGCTATTAAGCTCTGGTC  
AAGGGATGGCAGTT TTTATAGCTTCTCCACTCCTAGTT CAGGCTCAACACAA TTTCTGAACTAAGTT  
CTCAGGAATATCCACATCATT TTTCTAAAAGGAAGATAAC GAAACCATT TTTGGGATTGGATTCTCAG  
ATAGGAAGCATAGCG TTTGATACACGGAGAGAAAATAATGCGTCCC TTTACCGACAACAAGCTTGCACG  
AGGAGGCTTCTTATAGGTTCCCTGTAGGAGAAGCTCC TTTG GATGTTAAT GAAATCCCT TTTGCTGTTC  
ACATAGTACGGTAT TTT CAGAGGAGACTGCGAATACAGAACAAGCTCTTATT CAGAATGAGAG TTTGGGA  
GAGATACCAG TTTCTGCTGAGGTAGTAGGACAAGATACGGTTAGTT CCGCTTACCAG TTTCTCTCCATT  
TAGGGATGGCCGTGTTAGCCTCGGTTCTCT TTTCTACAGAGGATTATAAGACTGCGGTAGAACATCG TAA  
AGGTCTGGAGGACCTCCAGACCCATTGAT TTTATCAATACC GAAATGTGGCTGTTGATCCC GCCATTATT  
TTTCAATCACCCTCTCCATT CAGT TTTCTTCGCGTT TTTCCGTGCAAGGTAAGCCGGAAGCTGTAGCTG  
TATACAATGATGATCAAGAAGAAGCTGCAGGTG GAAATCGAGATAGTGATGAAGG GAAAGACCAAGAGCA  
GGA TAAAACGAGA GAAACAGAGGATGCAGGCGGCGATT CATGAGAATAATCCCT TTTGATCCTTATGGAT  
CCATGGCT TTTCAAGCGATAGC GAAAGATCCTCAAGAGC GAAAGAATGGGAGCATATCAGAGAAA TTT C  
AGAAGAGATTGCTCGTAATGAAGC TTTACGCATGGC TTTATTGGCTATTGCCGATCAAGAAGATAAAGAA  
AAAAAA CAAAAGCATCGGTT CAAAATCTTAA CAAA AAA CAAA CCAGGATGTTGCTTGGTCAGCTACGTC  
ATTTCCGATTGGA TTTCCAAA AACTGCAAGCAGGAGTTGT CATCGAGTGGTCTTGGGATGATAAA TCCAA  
GCGCTCTAAGTCATTAGGATCTCGGATTACCA GAAATCTAA GAAACGATCTGTATTAGCGCTGCTGCA  
GCACAAGCTATTGCTCATGCCGAGAGGCTTGGGTGATTGCCCGCAATGAAGGAATCTTGGAGATGACGT  
TGTCATATTCCAACA TAAAAGACAACGAATAATCTTGCAATCCAATCAAGCAGCTGTTTTTT TTT C GCTA  
GGAGGGAACGGAATGAT TAAAAGGATCTT TTTCTTT TTTCTCTTTGATCTGGGGAGTAATA CAAAAGCACACT  
CTCTTACTAATCCTTCCCATATCGCTTGAT TTTGCTTTGCTGTT TTTCTGT CAGAT TTTCAATGACAAT  
CATGCTTCTGTATTAATAAGGAAGCCATTCTCAGACCAATTGACAGATCCTGTAATTAGCGTCTT TTTA  
TC GAAATG CCAA TTTA TGATGTAGTTGGTACGGGGTTACCT TTTCA TAAA TAGAGAGACTAGGATGTT  
CTAATTGCTTAA TTTGCTGTACGG TAAAAGGAT TTTG TATCCTTTG TCGACAAGGATCACTACATCAACACC

ACAGT TTTTGTGCGGCATTCAATTCAGCAATAATCTGAGG TAAA GTGAGAG CAAA CATACCTACTTGGATG  
GATTC TTTTCGCTGATCGAATATGGTGAAGAAGTGT TTTCTAGAGCAGCAGAAGTCCCTCCAT CAAA GGAAA  
AATACTCGATGAGTTGATTGTTAA TAAAGCACCAGCAGAGG TTTGCGT TTTAA TAAAATGACAAA TTTT  
TGCGCTT TTTAATCCAATTATTAGGTTAGCGCTCTTCTCTAACGAAGCTAATG TAAA ATTAGCAGATCCG  
ATCCAAGCGAGTTCTCCATCTATTGCCATAGTTT TTTGATGCATGAGT TTTCTGTGCATGGGAGGATGTT  
CTCCAAGGTAAGATAGGGAGACTGAGAGAAGTCCGCATT TTTA GAGATACGTTGGTAATGAATACATAC  
AGGAATGCGAGCGGACACTTGT TTTCAA CTGTCTGTAGCGGGAGCAGATAGGTCA TAAA TACTG  
AGAAA AATATCTTTT TTTG CAGAGTCTATCGCATCACATAGTA TTTG CGTTACATTTGTCTCCACACTGTT  
TGGTGAAGATAACAGGTTCCCTTGGATTCAATAAGCG TTTG GAAGGTATCAGCAGATTGAGTCGGGGCTGG  
GGCT TTTAG TAAA AATCCTCCAA CAAA AAGG GAAA CTAAGCTGAACATTAT TTTGGAAA TAAGGTGT TTT  
GTTTT TTTT CATTG ATTGTGTTT A GTCCTTGACACCTCGATAAGGTGCTGTT TTTA ATCTGCTCATGAA  
TAGTTGTTACTAACATGATTTTTTTA CGGCTATTTA TTTTCT TTTAAT TAAAA CAAA CAAA AATCTAT  
TTTA CAATCTGTT TTTAAACAAA AAAACA TAAAAAAGGTTATTATGG GAAA TAGCTATGCCAGCGAGAAG  
AAA CAAGAT TTTG CGTTGCCTCATCAGCTTCGACTTCCTTAGGATAAGGAGG TTT CATGAGGGCATT CAG  
GATCATGGGGGGGTGTAACCTCACCTTGTGATTAGTGAT TTTG ACTTACAGGGATGTG TAAA TCTGTTGCA  
GGAGAAGATCGTG TAAA TATTCTCCATA TAAA TTC TTTCTACTAGAGAGAGCACTGGATAGATCTTCCA  
C TAAA ATAACAAGAGGCCAATCTGC TAAA TGGGGTCTTGTAGTAGAGCGGGGATATCTAGCTGCTGTAG  
AGAAG TTTCTAAAAC TAAA CAACCTCTACAGAAA ACTCCTAT TTTG AGATATTCCAGGAAGAGAAGGGCCT  
CGATACCGTCTGGG TAAA GAGCGGATGGGAGCTCCCACGCC TAAAAAATACC TTTG GATCC TTTA TTGA  
ATCCGCTACCTGTATAATCCAGGGTATCATTCCGAGTCTCC GAAA GGATAAGAAGATCGCGGT CAAA ATT  
CATGCGTTC TAAA ACGCATTCTAACAAGCTAGAAA AGT TTTCTAAA TCTACGGATTGATCTGTAATCCAT  
AGAAA TTTTGT TTAAGGAGAGTTGTCCCTCTCCAAGTATTCCG CAAA GCAGAGCGTAGAGCTTCTTCCAGT  
AACGTTCTTTA ACTATAGCTGCAGCCAGAGCGTGAACCCGGCTTCTCCATAGCTT TTTAGGTCCTGAAC  
TCCAGGCATGATCAGAGGGAAGAGAGGA GAAA GTAGTTCTTGAAGCTTA TTTT CCAAGAAA AATCTTCT  
TG GAAA GGT TTTTCTACAACAGTCGCAGGATAGATAGCATC TTTTCTTATGATATAAGCAGTTGCA TTTAA  
AGATCGGGAAA TCATGTGT TAAA CTATAGTATCC GAAA TGATCTCC GAAA GGACCTTCTGGACGACGTT  
GCCTGCAACGGCCTCGCTGTAAGAATGAATTCAGAATCACATAGCAGAGGGTGCCTGACTGCGGATGC  
TTCTCTA CAAA GCTAAGCTTTTTTAT TTTTGTAAA AAAGAA CAAA TAAA AGCTCTGGAACATTCTCTGGAA  
GAGGGGCAATAGCAGATAGGAT CAAA AAAGGATTC CAGATAGGAACACTGTGACAGGAAGAT TTTG TTT  
TTTTTGTTCAGCTT CAAAGAAA TGGGCTCCACCACCTT TTTGAA TTTGGAAA TGAATCC CAAA GTCCT  
TTATCGAAGCGCTGCATACGATACATCCC TAAA TTAGGGACGCCATTCTCAGGAGATTGGGTGTACAC CA  
AAGGAAGTGT TAAA AAGGGGCCCATCTTCTGGCCAGCTGGTAAGCATAGGAAGCTGGGAGAGATTAGG  
AGCATCTTGATAAAGAAA AAGGGGAGGAGCG TAAA TGGCG TTTA CGCATTCTAATGCAGAGATCCACGC  
TT GAAA AGAGAGCGGTGCTTCCA CAAA GAAGAAA AAGAAGGGGGAGAAGATAGTAAGTGAATAA TTTG TT  
CAAAAAGATCTGAAGAGAGATCTGGGAACAGTAGGTCAACACGTCTTCGAGTGCCGAA TAAA TTAGTGAG  
CACAGG GAAA GGGCATCCCTAACCTGAT GAAA AAGGAGGGCTGGTCCTTCTC TTTT TACAACACGACGA  
TGGA TTTT CAGCGATCTC CAAA TGGGGATCTACAGGAACATGAATATCAATGAGCTCATGTTGAGAGCG CA  
AATAATCCACTAAA GATCGTAAG GAAA ACACGTCTAGTCCGCTTATTGCAATA TAAAAATAGT TTTT CCG  
AACTGCCC CAAA AAGGCTATGTGT CAGGGATAGATACACGCATGCTGAGG GAAA ATC TTTT CAGCATGC  
ACATAGGAGACT TAAA AACC TTTG CT TTTAGCTCTAGCAACAACCTGATCTAACCCTAG TTTA TCAACAAG  
GCG TAAA GCTGCTGCAGAAA TTTG AGTTT GAGGAAGCGAT TTTT C CAGTAGACCATAGTCTCTTAGTC  
ATCATATTAGGGAAGAATCGACGT TTTG TTCTTCTGTAAC TTTCAA ACCGATCCCTTT TTTT TTTTAG  
AAA TCCCTCGGATAGCATAGCTATAACCGCAGCAGGGC TTTT CTCTGTAAGCGCACATTT TTTT GACAT  
GACT TTTT CTATATCACTGGCCGCTATCTCTCGACAGGGCAACTGTAA CAAAAA GAAA CTATGTTAGACC  
TTTT TTTA ATATATCGGGAAGAAGT TTTT C T GAAA AAGTGGCAGAAA ATGTGTTT CAAA TAAA AGTACTC  
AAG GAAA CC TAAA ATAGAGCCTCAAG TAAAGAA TTTA GCTTAGAATGAGAGGA TAAA TCTTCAATAGAAG  
GCTTAACTCGATACACCCAATTATTT TTTG AAA TAGTTTCTGGCAGATTGATTC TTTT C TAGCGAGGAGT  
TTTTG ATAT CAAA TCCGGGAACAGAGCCAGATAGTCATTAATAAGATTGATGC GAAA AATAGAAGAGGT T  
TTG TGAGAGAGT TTTT CAGGA TTTT C GGTATGATTGTGAAGAGATAGGGTGGGAAGATAGGGGAGTCC TAAA  
ACTGAG CAAA TAG TTTG GATTCTGAGGAGATTC TTTT C ACCATGAGGCTAATGTAGAGGAATCATGAGT  
AGAGAGGCTTGTGACGGATAGAGGGTCTGATTGATC GAAA AAGGGGTATAGGCTCCATTCCCTTCCAG TTT  
CGTTCCCAACGAGGAATTCTAGTGCCGCATACGG CAAA AAGACTCGAGCATACG TTTT C ACATCGGAAGGGA  
TCGTTCCAGATCTTCTCCTATAGGTAGCATAGATGAACTGGTCAAGAGGTGAGATAAGATATCTTGCCC

TTGAGCTAGATAGTC**TTTC**GGATCATGAGGTT**CAAA**GCGTCCGCATCCAGACTCATCCCATACC**CAAA**AT  
C**GAAA**GAGACCGACGATATGATCAAGACGGTAT**TAAA**GAG**TAAA**AATTCTCCGCATAACGTAAGCGCTCCT  
TCCACCAGAGGTAGTTATCTTGTTG**CAAA**GT**TTTC**CATATTAT**TAAA**TGGGGAGATGCCAGTTCTGACCTTC  
CGCATTATACAGGTCAGGAGGAGCACCTACAGATTC**TGAAGAG****GAAA**AGTAATGCCTA**TAAA**ACCAGACA  
TCGCAGCTATC**TTTA**CTGATTAGAATAGGGATATCCCC**TTTG**ATGAGACAGCT**TTTG**CAATTGGCATGCT  
CCCGCACTTGTGTCATCTGTTGGAAGCA**CAAA**TACTGTAGATAAGAGT**GAAA**TTGTATATCTTCCG**CAAA**  
AGTACGTT**CATGCTCGGTAATCTGGGAGAGATCTGTGTAGGTGGTTGGCCAATGATTAATAGGAAGGTTA**  
TC**CAAA**TGTTCTCGGATAGAGC**GAAA**GAGAGCGTAGGGATGTAACCAATATT**TTTC**CTGTTACAGAAGG  
CA**TAAA**AATCAGGATGATCAGTGAGTTT**TTTC**TG**TTTA**CACACGCGGTAGTACTCTT**GAAAA**AAATCTCT  
CTTCATAGAGCGAACTT**TTTC**CATAATGTACTT**GAGGAAGTTGAGAGAGTTGCTGCA****TTTC**TCGTATGCGT  
G**TTTC**CGCAGCTGGCACTTCTTC**TTTA**TAGGGGAGCGCAGAGATA**GAAA**GGTGAAGAGGATTGAGTGCTA  
TCGAA**GAAA**TGCTATTGTAAGGACTCGAACAGGACCCTGTATCGTTAATCGGAAGAA**TTTG**AAGGA**TTTG**  
**AAA**ACCACACGAGATACACCAATCGATCATAGGAATCAGGTCAA**GAAA**ATTCACCTATCCCACAAC**TTTC**T  
TGAGTATGGAGA**GAAA**ATAACGGTACGCATACGCCATGCTTAGGAGAAGTATCTATCTGATTC**CAAA**TCT  
**TTTC**GAATGGAAGATTGCTGGATGATACGTCGGGATTGGGATAATGACGGCATAA**TTTA**CAGGTGATACAT  
ACCTAGAGCATG**TAAA**TCTGGAAGTCTCCT**TTTG**AGATAGATTGCATCCAGATATTGGCATGCTGC**GAA**  
**AAA**GAAC**TAA**GTAACGGGCGAGCT**TTTC**TCCAT**TTA**GATAGGTCATGTTAAGCCGATCACAGAGATAGA  
GTTGGTTAGAGAT**TTTC**ACCGTATCCTAGAGTGCC**TTTA**AATATTAGATTGCGGAGATCCATTGATAGACAA  
**AGCAGC****TTTGAAA**AATTT**TTTG**TC**TAA**AGGTATTCTCTGGAAGT**TTTC**CAAGCATGACTCCAGCAAC**TAAA**  
AATCCTGAATTACCATCCTCTTCAA**TTTG**TACAGCAACATTGTTGTATC**CAAA**GCGAACTATACAGGCAT  
TATTGGAATCAGGAGTAAGAGGGCTGTTGAT**TTTG**AGTCCCTAATTCAGTAAGGAGTTGTT**CAAA**TTGAT**T**  
**TTG**CA**TAA**AGGAAGCGCCTCTT**TTTA**TTACAGTT**TTTA**CAAGTTAGGGTGATGGAGGCTGTGTTGAGGT  
AGGTGACGTTGGAATCTCAGATTGAGGTACTGGAGCATGAGGAGGCGTACTAGAGAAGGAAGATCGTGGG  
AAGTCACCTGG**TTTA**AGGATAATCCTCATTATCCGCA**TTTA**TCGCATCTAGCGTA**TTTG**TGATAACCGATG  
CCAGCTGCTGTTTTT**TTTC**AGCTCCAGAGAATATTCTAGGCGAACAGCCATTAAGAGCGCGGAAGAATAA  
G**TTTAAA**ACTTTCAG**TTTG**AGGACCAGTATCTGGCCCTACCAGTTCA**TTTA**ATGCCT**TTTG**AGCT**TTTG**GAA  
GAGGAAGGGAAT**TTTA**TCTTCTACTAATTGTAAGAAGGT**TTTAGT****TAA**ATTTCTGTCTGTTAAGGATGGAA  
TAGGGGCATGTCCTTCATGCT**TTTA**AGCTAT**TTTC**CAAGTTCCAATA**TTTC**TAT**CAAAA**AAAGCTATCTAC  
AGAGTGTAAGGCTTGAGATTGCTTAGTTCGCTCATATATACTTGCAAT**TTTG**CAGGAGGAATGGAAGGG  
CCCTCCGAT**TTTAAA**TCTGCTACCATGCCATTCACTA**GAAA**CTCCATAACAGCGGT**TTTC**TCTGATGGCG  
AGTAAGAAGCAAGCA**TTTG**ATG**TAAA**TTAGCGCAATTAGAGGGGGATGAGGTTACT**TGAAA**TATAAGGA  
GCGAAGCGATGAAGGAGATGTAT**TTTG**CTCTGGAAG**CAA**AGG**TTTC**TGAAGCTAACAGAACATTGCGTCCCT  
CCAACAATCGCCTGAGGATTCTGGCTCATCAGTTGATGCT**TTTG**CCTGAATGAGAGCGGACTTAA**TTTC**  
CATCAGAGGGAGCTA**TTTG**AATTAGATAATCAAGAGCTAGATCC**TTTA**ATTGTGGGATCAGAAA**TTT**ACT  
TGTGAGCGCATCGAGAA**TTTC**GTCAGAAGAAGAATCATCATCGAACGAATT**TTTC**AACTCTC**GAAA**ATCT  
TCTCCAGAGACTTCG**GAA**AGATCTCTGT**GAAA**CGATCTTCAAGAGGAGTATCGCCTT**TTTC**CTCTGTGC  
TCTCGGAT**TTTC****TTTC**TGC**TTTA**TCCGCTGTTGG**TTTG**CGACGAGCTTCTAATGATT**CAAA**CTTCTCTTC  
TTTTTT**TTTG**ATTGCGGTTGCAGCTGCAGGAT**TTTA**TGAGATCCTCACATTC**TTTG**AGCATACTTGCCCTCA  
GAAGCTCCTGAGAGCCGATAACCTCTTGTGCATCTTGAGTAGCTGCAGCAGCTTGTGCTCGCGCAACGT  
CTACTG**TTTG**GGTGTGCCTAGCCCTCCAGCTCCTCCTGATGCAGTCATCTCTCTCACCTCACGGTTAG  
**AAA**A**TTTG**AATTCTTCC**CAAA**AGGCTGGATTCTAA**TTTC**AGG**TAAA**ACTTCTTGGA**GAAA**ATCACAGCGA  
TATCAGGGAATTCTGTCTCTATCAA**TTTC**CGTACATAGCGTCTGACATCAATTGCTGTCAACAGCACAGG  
AGGCTGTCCTCCAGGAGGTGTAGGAGTAATAGTCATCCGCATAGAT**TTTA**AGATGAGG**TTTA**CAGAATCT  
GGATC**TAA**AGC**CAAA**TAAGATCCTGCAGAAG**TTTGTTG**ATTGCTCCGCGGATCATCTCTTCAA**TTTC**CAG  
GATCGAGCAGATATACA**GAAA**TAGCGGATTGCCCTTGAGAGAACTTGAAGCTGATATAGAG**TTTC**AAGGA  
AGAGCGCACATATTCAGTAAGTAATACTGTATCTT**TTTC**CGTCTGTGCCATTCGCT**CAAA**GATTC**CAAA**  
ATAGTTCG**TAAA**TCCCTAATGGATA**TTTG**TTCCTTGAAC**TAAA**CGCT**TAA**AGAT**TTTC**TGTAAGCTTCTGTA  
GAGGAATAAGACGGGTAACCTC**TTTA**ACAAGATCAGGGAAGGAACGTTCCA**TAAA**TTCAATCATAGAGCG  
TACTTCCCTGAATGCC**TAA**GAACCTT**GAGAA****TTTC**TATGGAAGAAGTAGGACAAGTGAAGAATAATCACT  
TC**CAAA**GGAGACCAGTA**TTTA**ATCGCAGC**TTTC**TCTAAGATAGTGAGAGCATCTGTACTAACCCAAGTGG  
AAGGCAATCCTGCAGCATT**TTTG**TAAGTAATA**AAA**AGGTAAGTTATACCGAGATAAGT**TTTC**TTCTACTTC  
A**TTTG**TTAACACATGA**TTTG**GGTGGAA**TTTC**CGCGAACGTAGGGAACCTCATT**CAGCAGAATCATATAG**  
TCATTACCTTCCAAGGAAGGGGAGTCTGTACGTACATGGATTCTGGATAACGAATTCCAATATCTGAT

AGAGAGCCTGACGCATTTTAGGAATCATATCATCCA<sup>CAAAAC</sup>TTTGCCCCGATTTG<sup>TTTG</sup>GTTTCGTTGTTGGAT  
GAG<sup>TTTAGAAA</sup>GATCTTTTCCAAGTTCAAGAATTACAGGAAGAGTCAGAGCATAATCATCAGAATTTTCT  
CCTGAAGCCGCAGCTCCATCAGCGGCACCTACTGTAGTAGTAGAGCTGGCTCCGCCTTTTTTCTCCTGGAG  
AGTTTTTCTTAGTGATTAACAGAATACCTAATACTG<sup>CAAA</sup>GAGAACGGCCAT<sup>TAAAG</sup><sup>CAAAT</sup>GACCA<sup>TAA</sup>  
<sup>AGG</sup><sup>GAAA</sup>CC<sup>TTTG</sup>AAGAATCCGATTCCTAAGGTTGCGCCTGCGGATAGGAGAAGTGCCCGAGGTTC<sup>TTTA</sup>  
ACCAACTGGCTA<sup>GAAAT</sup>TTTCTTACCAAGGTTAGTGTC<sup>TTTA</sup>TCACTAGATACTCGAGTGTTACGATAC  
CAGCTGT<sup>TAAAG</sup>GAGATTAACAGAGAGGGGATTTGA<sup>GAAA</sup>CTAACCCATCACCGATCGTAATCAACGTGTA  
GATGTGCGCGGCTTGAGCCATCGTCATGCCCTTCATGGTCACTCCGATGACTAATCCTCCTACGATGTTA  
ATCAAGGAGATAACAATCCCTGCGATCACGTCTCCCTTAATGAACTTCATGGCTCCGTCCATAGCTCCAT<sup>T</sup>  
<sup>AAA</sup>GTTTAC<sup>TTTCT</sup>TTTCTGAATCTGAGATCGCTTATCACGAGCTTGTGTGCGATCAATCATTCCTGCTCG  
TAGGTCGGCATCGATGGCCATCTG<sup>TTTA</sup>CCAGGCATGGCATCTAATCGGAATCGAGCAGCTACCTCAGCG  
ACCTCTCCGCACCT<sup>TTTG</sup>TTACCACGA<sup>TAAA</sup>CTGAATGATGGTGATGATTAGGAAGATAA<sup>TAAA</sup>TCCAA  
CGACATAG<sup>TTTCT</sup>CTCCAACGACGAAGTCTCCGAAGGCTTGATCACGTGACCAGCATAAGCATGAAGGAG  
AA<sup>TTTG</sup>TCGGGAGGAA<sup>GAAA</sup>TGTTAATCCCCAATCGGAACATTGTGGTGATTAAGAGTAAGGAGGG<sup>GAAA</sup>  
ACA<sup>GAAA</sup>GTTGTAATGCGCTGGGAATATACAAGGCAACCATCAGCAGGAACACAGAGATCGCCAAGTTAA  
TGGTGATCA<sup>TAAA</sup>GTCCACCATAGCTGGAGGCAATGG<sup>CAAA</sup>ATGATCATCAAGACCACGCCTAACATCCA  
CATGGCGAGGATCAGGTCCTGACTGGACTTG<sup>TTTA</sup>TCATATTCAGGGCCGCATCTCCCCGAATGTTCTACTG  
A<sup>CAAA</sup>GTTGAGTAGCTTGTTCATTACAGATTATCGAATTGGTTAATGTT<sup>TTTA</sup>TTTCTCAAGGT<sup>TTTG</sup>CGC  
ATTAAGAGAAGTGATATAGAGAAGGA<sup>TTTCT</sup>CCCCAACAGCTTCATATGTGGTCTCTGGAA<sup>TAAA</sup>CTTCAAC  
TCT<sup>TTTCT</sup>TTTCTCATCTAGCAGCTGGTGTGCTAAGGGAACATTCCGCATGATAGGAACTCCATATTTTCTCAG  
CTTCCGCAATAATCCTTT<sup>TTTG</sup>CTCTTAAG<sup>TTTA</sup>CCCCCATAGCTATGATCCATGGAGC<sup>TTTG</sup>TATTTTCT  
AGGCATGTAGCCAATCGCTACAGCGATGTC<sup>TTTA</sup>GGGTTAGATACAACGGCGCTAGCATGCTTGATTTTGA  
GAGGACGTATCCTCGTAAGCGATCTCTTGAGCAATTTGACGTGCTCGCC<sup>TTTA</sup><sup>TTT</sup>CAGGG<sup>TTTCT</sup>CTT  
CTGTATC<sup>TTTG</sup>GAATCTTG<sup>TTTCT</sup>ACCT<sup>CAAA</sup>TT<sup>TTTCT</sup>CATCTTGAGTTCCTTAGC<sup>GAAA</sup>CTGTGACGCTG  
ATACACGAGGTCTATCACTGCAACCACAAG<sup>GAAA</sup>AATAGGCCAATAGAAGTAACCGC<sup>TTTA</sup>TATAGAATC  
TC<sup>TTTAAA</sup>CACTTGAGCTGTAACCAGAGGAGGAACCTCTGCAG<sup>TTTCT</sup>CAATAACAAGTTCCTACACGATTTT  
<sup>TTA</sup>GACAATGTAGAGGAT<sup>TAAAG</sup>GCAGCTCCT<sup>GAAA</sup>TCT<sup>TAAA</sup>AATAGACTTCAGTAACTCAAT<sup>GAAAGT</sup>  
CTTTAC<sup>TTTGA</sup>ATTT<sup>TTTGTTT</sup>CAGGTTGTCAATGGGATTGAATTTCTTTTAAATCCGG<sup>TTTGAAA</sup>ACTTCT  
GTAGAGAAGGTAGGACCAACAATTAAGAATCCTATCAACAATCCTACGAATCCCACCGCTCCTAA<sup>CAAA</sup>G  
GAAGAGAGACTGTCAGAATCAGAATAAGGCAATTT<sup>TTTAAA</sup>TAATAGATGGCTAAGTGCGGATCATGATT  
CTGGGGAGCTGT<sup>TTTAAA</sup>AATAGATAC<sup>TAAA</sup>AGCTTCCTAAGTGTTCAG<sup>CAAAA</sup>AATGAAGC<sup>CAAAGAA</sup>  
<sup>AAC</sup>GTAAAGAACATGGAGACAATGAACGTAATCGCAGAAG<sup>GAAA</sup>ATCTTGAGAT<sup>TTTG</sup>GCTACCTGCCCT  
TT<sup>TTTCT</sup>TAGCGTCCCGAAGACGCTTGGGGTTCGCCCT<sup>TTTCT</sup>TGTTT<sup>TTTCT</sup>CGCCATAGATGGCCAGTTGCT  
TAAGCGCTATAAGGAATACTTCGCAAGTTACCGTATA<sup>TAAAT</sup>GTT<sup>TTTCT</sup>CAAG<sup>GAAA</sup>GAAGGTGGCAGAT  
GCTCATCCAT<sup>TTTATAAACAAA</sup>GAGTAAGGGGTTGTGTAGAGAACAGAATATTTT<sup>TTTAAA</sup>GAGCGTTT  
<sup>TTCT</sup>ATGAAGCACTAATCTTGCTTT<sup>TTTCTTTA</sup>GAA<sup>TTTCT</sup>TTTTTCTTAATAA<sup>TAAA</sup>AAGGCTGTGTTAGC  
CTTAA<sup>GAAA</sup>AAGCTGTACAACCTCTTAGGTAAT<sup>GAAA</sup>ATGGGAC<sup>CAAA</sup>CAGAGTGC<sup>GAA</sup>ATAGTAGGTCCT  
CCTAATGTAGG<sup>GAAA</sup>TCAGGATTA<sup>TTTA</sup>ATGCGTTGACAGGCGCACAAAGTTGCCTCCTGTAATTATCCCT  
TCTGCACAATAGATCCTAATGTGCGGTATTGTGCCTGTTATCGATCCAAGGTTAGAGACCTTAGCACGTAT  
TAGTCAGAGC<sup>CAAA</sup>AGATTATCTATGCAGATATGAAG<sup>TTTG</sup>TAGACATCGCAGGATTAG<sup>TAAA</sup>AGGAGCA  
GCTAGCGGTGCTGGCTTAGGGAATCGTTT<sup>TTTA</sup>TCACATATTCGAGAGACTCACGCTATTGCGCATGTTG  
TTCGTTGCTTCGACAATGATGATATAACCCATGTATCTGG<sup>GAAA</sup>ATTGATCCTGAAGAAGATATAGCTGT  
GATTAATCTAGAGCTCGTATTAGCAGACT<sup>TTTCT</sup>TTCTGCCACTAGCGTGCAGAG<sup>GAAA</sup>CTTG<sup>GAAA</sup>ACAG  
GC<sup>TAAA</sup>GG<sup>GAAA</sup>AAAGATATTGGGCAGTTGCTACCTCTATTAGATCGCGTAGTTGATCA<sup>TTTA</sup>GAAATCAG  
<sup>GAAA</sup>TCCTGTTCGAACCCCTCTCGC<sup>TTTCTTTA</sup>GAG<sup>GAAA</sup>AGT<sup>TTTA</sup>ATT<sup>GAAA</sup>CCCTATCC<sup>TTTCT</sup>CTCAC  
AG<sup>GAAA</sup>GCCTATGCTCTATATTGCGAATATTGATGAAGACTC<sup>TTTA</sup>ACGGATCTGGATAACCCCTATGTC  
CAG<sup>GAAA</sup>GTACGGGAGATCGC<sup>TAAA</sup>AGAGAAGAGGCGAATGTAGTTCCATCTGTG<sup>TAAA</sup>ATTAGAGGAAG  
<sup>AAA</sup>TTCTATCGCTCCCTCTAGAGGAACGACAAGATTT<sup>TTTA</sup>CATAGCTTAGGCTACAAGAGTCTGGATT  
GAATCG<sup>TTTA</sup>GTAGCTTACAGCATAACCACTCTTGGGTTAA<sup>TTTCT</sup>TTA<sup>TTTCT</sup>ACTACAGGACCACAAGAG  
ACTCGAGCTTGACAA<sup>TTTCTAAA</sup>GGGGTTACAGCGGCAGAGGCTGCAGGG<sup>GAAA</sup>TTCAATTCGGATATT<sup>C</sup>  
<sup>AAA</sup>GAGGAT<sup>TTTA</sup>TTTCGCGCTGAAGTTGTAACCTATGGAGGATATTGTTGCTTACGATGGAAGAGCTGGAGC  
GCGAGAAGCCGG<sup>GAAA</sup>CTACGTGCTGAAGGTAGGGACTATATTGTTCAGGATGGGGATATTATGCTCTTT<sup>T</sup>  
<sup>TTG</sup>CATAAT<sup>TAAA</sup>AGGAGCATTATCTATT<sup>TTTA</sup>TTGAGACGGGCTTGCGGATATCTTCTTGAATGGCAA

GGACAAGCTCGTC TTTA GAAGAAA AGAGCT TTTT TTCCCTGAGAAA TTGCTCAAGAATCACAGTAATACT  
CTTATCGTAGAGATCTTCT GAAA AATCAAGGATATGTGCCTCTAGGCATAGTTGGTGTC TTTG CATTGTG  
GGCGCCATACC TAAA TTCATAACACCTGCATAGCTGAACCCTTCAATAACGATAGTACAAGTATATACCC  
C TAAA GGAAGTAGAGAATGGGTAAGGGGAAGATTGATTGTTGCATATC CAAA AGATGTCCCGATTCCTCG  
TCCATGAGCAACC TTTT CTGTATAAG CAAA AGGTCTCCCA GAAA CT TTTT TGCAGAGCA CAAA TC TTTT  
TCTCTAA GAAA TTGTCGAATT TTTT TGCTAGATACAATAGTGCCCTCAATCTGTAGGGGAGGGACTTCTT  
CTAGAGATATCCC TAAA GAGGCAG CAAA AGGCCTTAACG TTTT TGCTGTTCC TAAA CCACCCTTCCCAAG  
TCTAGAATCGTAACCTAAGACAATTC TTGATGGATGTAGAGTCTTG TAAATAGACTGGA TAAA TAGCTCT  
GCCTCTTGATTAGCTA TTTT CTGGT TAAA AGGGAGAACGGCTAGATAATCAATGCCGCAGCCAGCTAGAA  
GCTGAATACGCTCCTCAAGAGAGGTAATAG TTTT TGAGGAGAGTTAGA CAAA GTATGCTCAGGATGCTG  
GCTGAACGTAATTACTCCAGAT TTTT CCAG GAAA CTTCGT TAAAAA GAAAG CAAA GCTTGGTGTCC TAAA  
TGACACCCATC GAAA AAACCTATAGTAACAGATTC TATAGGATTAGAGGACGGGAGCAGGCTGTAGAATA  
AGTCCA TTTT GCATCAG TAAA TAAGGAGATACATTGAACTCGGGTTCGTC TAAA AGATTCCCATCAATAC  
ACTGATCGATAGAGAAGCTTCCACTACGCAACCGTCGGAGTTCTTC TAAA TAAGCTCCGCATCCCAACAT  
ATTGCCTAACCTCATGAGCGATACTGCGGATGTATGTTCC TTTT CTGCATTGAACTA CAAA ATGTAGACGA  
GGGTATTCGTA TTTT AAC CAAACGAAGA TTTT ACCGTTACTGTGG CAAA ACGTTCGTTCTATAGATAACCCCT  
GCCTAGCATATTCGTATAATTTT TTTT CTTGTAC TTTT CTTTGCAGAGAACATAGGAGGGACTTGTGAA  
TTTCCCCTT GAAA ATAGCTTGTGCAAGTCAAGACTTCGTCCATAGTTGGAACTTT TTTT AGATCGCCCAACA  
ATTTTCCCATCGCAATCGTAAGTATCCGTCGTGGTTCC TAAA TGCGCTACCCTGCATACTC TTTT GTCTT  
CAAA CAGCATGATGTCCGATAGTCGGGTGAAT TTTT TCCCTATTAGCATAACCATAACGCCTGTAG CAAA  
AGGATC TAAA GTCCCTGCATGGCCAAATTTT TTTT ACACCTATTAACCTAACAAGAGAACGAATAAGACTA  
AAAGAAGTTCTCCCTTGTGG TTTT TCTACCAGCAAA ACGCCTTCAATAGATTCTGTGCAAGTTCCATAA  
TATTGATAGTGGAGTTCAGAAGGATTGTCTTT TTTT GTTATGGGTTAGTTTTTTTATCTTGTTCGGCTATTT  
TCAAGAGAAGAC TTTT TATATGGTCTTGAGGAGAGAAA ATATCTTCCACATAGAAA TT CAAA TCCGGGAA  
ATATTTAAGA ACTAAGTCT TTTA GAAGCCT GAAA AGCAA TAAA CCTGCCGAAGCT TTTA ATGCCGCAAGA  
GTTTCTTCTTGGGAATTCTCATGCGCATAATGGATACG TAAA CACAAGCCGACTGTAGGTCTCTCGACA  
AAGATACTCGTGTATTGTGATCCAGCGATT C GAAA TC TTTT GGTGCTTACATCCTT CAAA ATGACTTT  
TGCAATAGCTTCTCGAAGCATTGCATTCAC TTTT TTTT CATTCTCTAT TTTT CAGCCATATTAGCCTACAAT  
GTTTGTGGGTGAT TAAA TGACCTCATAGCACTGTAATATATACCAACTTGTGCTTGCTGATAATTATCTA  
ACAGAATACCGCACTCCATTCCCTTT TTTT CACCTCCTTACATCCTC TTTA AGGCGT TTTA AGGAAGACAG  
AGACCC TTTT CATAGAACCTC TTTA TCCCGGATAATACGGATT TTTT TGATTACGTACCACGGTTCCTTCT  
GTAAC TAGGCAGCCG TAAA TTGTACCCAATTGAGAAGACT TAAA GGTCCG TTTA TTTT TGCAGCACCCA  
AGTT TTTT TCTTCTGCTATAGGATCTAATAGACCTGTATGATCTC TTTT GATAGCGTCTACAGCATGATA  
GATGATGTCGAATAGA CAAAC TTTA ACATTCAAGTTCTTGATTAATGGTTCTGCATGGC TTTT TACGCTT  
GTGTG GAAA CCAATGACAGTGGC TTTA GATGCCGATGC TAAA CGAATATCTGATTCG GAAA ATATCTCCAA  
CTCCGCTAGATAAGA TTTT GCATCTACCTTCTCAGAGCGGATATTCAATATAGAGTGCGC TAAA GCTTC  
AATAGAACCTTGAACATCTGC TTTT GATAATCAG TTTT CAAAGT TTTT TTGTTCTGTAATACAGCGT CAAAG  
TTTGTGCTGTTTT TTTT TG CAAA GCTGCAGATC TTTT TTGGCCAGCAAGTCGGGCGTAATAATCTC TTTT CG  
CGACCTTCTCATTT TTTT ACAACTA TAAA AGGATCTCCAGC TTTA GGGATTGCGGATAATCCTGTGATCAG  
AACAGGGGTAGAAGGTGTTGCCGACTGTAGGAGCTGGTTATGCTCATCATGCATTGTCTTGACCTTCCCA  
TAGCAATCGT TAAA TACTAACGCTTCTCCTAGATGCAAGGTTCCAT TTTT GAACGAGCACGGTAGCTACAG  
CTCCTAATCCT TTTA TGCAACTCGGATTCATAACCAGTCTCGCGCTTAGCAGAAGGATCGGC TTTT CAA  
TTCCAGAACTTCGGCTTG TAAA GCCAACAT TTTT AAGCAAGTCTTGCAACCCTTCGCCAGT TTTA GCAGAA  
GTATTAATAGTAGCAATCGATCCGCCCCACGCCTCAGGAAGAAGATCTAATTCTGCTAACTGACGGTACA  
CTGT TTTT TACATTGAAGTTCGGCTTATCACA TTTA TTAATAGCGACTACAATCGTAATGTTAGCTCC TTT  
AGCATGCTCGATAGCTTCAATGG TTTT GTTCTTTT GATACCCTCGTCTCCAGCAACTACCAAGACTACGATA  
TCG CAAA CCTCTGCTCCTTAGCTCTCATAGCAGAGAAGGCTTCGTGGCCTGGGGTGTGAGAACAGTAA  
TTT CACCAACAGGAGTTGTACA TTTT GAAGGCTCCTGTATGCTGGGTAATTGCTCCAGCTTCTGAGGCTGC  
CATATTGC TTTT TCTTAGTGCATCAATAATCGTTGTCTTACCATGATCGACGTGACCCA TAAA AGCTACG  
ATAGGGGAGCGAATAATAAGTT TTTT TGATCTGTGCAATTGACTTCGTCTCGAACTGTGTTCTCTACTA  
GACACAGCTTCTCT TTTT CTGAAGAATCAATTTT CAATCGTACATC CAAA ATTC TAAA CCGATGTATTCCAC  
AACCG TTTT GGCTATCTAAGACATCATTCACTACGTAGGTCATGCCATGAA TAAA GAGCTTCTGAATAAGT  
TCTGAAGCT TTTA GCTTCA TTTT CAGCAGCAAGATCT TTTA CAGTGATCGGAAGAGCAATCTTAATGTGTG

CTGGGCATTGAACAACGTGTTCTTCCGCTTGCTTTTTCGTTTTGTGAACACGTTTTC TTGCGCCA TTTATC  
TTCTTCAGAAGAACCCTTCA TTTAATCCATAGCGATCGCGTCTCTGTAAACGCCTTAACGCTCTCATCAGAT  
CTTTTAGATCGATCTCGTTCAGATCCGCGCTTCGCGTTGTTATTATTGTTGCTCGTTGACTCTCTGCGAT  
AAGAAGGCGCAGAGGAGGCTGGGCGAGAGCTTGTCCAGAAGGTGTTGTTTATTGTTATGGGAAGCAGC  
ATCATTTTGTGTCGAGGCTGTTGTTGAGTAGTCTCTCAGTTGATGCCGCTTTCGTTTCCTTAGCTGGAGCT  
TTGAACGTCTTAGCCAAGAGATGATTGATGTGTTTCCTGTAGGCCCAAACCTTAGGCTTGATAGAAA  
CGCTCTTAGGCTCTGTTCTTGTCTAATAATAGGAGTTTCCTCAATACGCTCCGGAGTCTCTGGAGAAGT  
CTCTTCTGAAGACTCTTTCCTTTTCCTCTTGTGGACCGAAGAAGTGTCTGTGCACCTCTTAGGGTTTGT  
TCTTTTGTGAGTAACAGAAGTAA TTTCTGGAGCCTTTATTGTCAGGGATGGCATCTAAAGTTAAA  
TGCATCTCCTGGCAGAGCCGTTGTTACGGTTCGGTCTGTCAGCAAA TGAAGAGCGATCTTTTGC  
CGAATTCTTCGCGCAGTAGATTCTGTTGCGCCCAAATCCACTTCAGGCGCAGGAGCAGGTGTGCCAGCAGT  
TTCTTA  
GAGCTCTTTTCTTTAGTTTGTAGCTTTACTTTGCTGGAGAATTTTTGTGTGCAGAAATCCGGCTTGAGCTA  
GTTTCGTTTTCAGTTTACTAAGCCAGCAGCCTTCGTTAACTGTGCGTCTTAACTTTCAACTTGAGGTT  
TTTCGTCAACTTTGCTTCTCCATA TTTGCTGACCTGTTCAAGAATCTTATAAGCTAGCTCTAAA  
CTAAT  
TCCTGGAACAGAAGCCAATTCGCTAGCACTAGCCAGCAATATTTTCCTAATCGTGTCTGATCCTGCGTGC  
TCTAGGTTCTGCACTATCAGCGTATTAATCCCTTCAACTTCTAATGGCTGATCTAATCGAGGGTCTTCGA  
ACTCTGCCAATTGCAAA CGTTGAATCTCCAACAACCTGTTGTATTCACTCATTC TTTG  
GACTTCAAGTTC  
ATAGCC TAAAATCTGACTGATTAGGCGAGCATTGATACCTCGTTTACCATAACGGTTGCGTAGTCCGAA  
TCTTGGACAATAATAGCGATAAC TTTGTCGTCTTCTAAAATAGCGATCTTTTGAATCTCTACAGGATAGA  
GCAAA TTTGTAAACAATCTGTGATACAGGGGAATAATTTTACAACGTCTATTTTCTCGTCATTCAATTC  
CCGAATGATATT TTTGATGCGAGATCCTCGCATTCC TACAAAAGCTCCTACAGCATCTGTTTGTG  
AGGTCG  
GAAGAGCGTACAGCCATT TTTGTCGATATCCTGCCCTCTCTTGAAT TTTAACAA TTTTCGACAGACCCTT  
CTTCTAGCTCAGGAACCTCCTGAA CAAA TAACTGCTTAA CAAA TTCAGGGTGGCTTCTGCTGAGAATTAC  
TTCAGCTCCACCATTTTCAGATTCTGTACTTCG TAAA GAAGCGCA TAAATCTTATCACCCACCTTATGT  
TTTTAGT TTTGGATAAAAAGCGAGCAGGAAGTAGTCTTCCACTTTCCCAAGTCAACAAC TAAATTTGG  
CTCCGCGAGCGAAA CTTTTAAACCACTCCC GAAATGA TTTTCATTT TTTTCGGTGTGCGTATTCTTCA  
TAAAT  
TACGCTCTCTCAGCATGACGAAGCT TTTGCCCCGATAA TTTGGCGTGCAGCATGTGCAGCAATCCTTCCA  
AACTGATCAGAGATAAAAAGGAACATCCATATACTGCCGATTTTGAACAATCTGGATCGTATTACGGCCCT  
TATCTAAAGGAATTTTCCTTACTTGGATTTTGGCATT TTTTCGACGATTTTGT TTTTCAAAAAACTTCTAT  
ATCGCCGGTGCAGAGATTGATACTTACGGACACA TTTGCATCGTCTCTAAGAGTCTTTTTCGCAGCAAT  
TTTCAGAGCAGATTCAATAGCACCTACTATCGTAGAGCGTTGAATACC TTTCTCTCTTTCCATGTAGTCAA  
AAATAGCCACAAGATCCTTGTTCATTAATACTCCTCTTATGGGTAAAGG GAAAAAAAAG CAAAAAAAATAAT  
GCTAACGGAGCAGAGCCCTAGAGCTCTGCTCTTATG TTTGCTCTTCACTAACGAAGATTATTAG TAAAGA  
GATTAGTCTCTGTGAGAAAGATTCTTCTCCGATCGTGACCAGCATCTCCCCATGAGCAAGGAACCTTT  
TAATA GAAAAGAGAAA CTTTCTTGTGATCTGGGTCTAGCTTGATAAC TTTAGCAGAAA CTTTGTCTCCAAT  
AGAGAGAACATCTTCAAT TTTAG CAAAAGGTTTC TCTGAAAGCTCGGATACATGGATCAGTCTTCCGATA  
CCAT TTTGCAACTCAAC GAAAGCTC CAAAAGCCGTAAT TTTAGTTACTACGCCAGAGATATCACTTCCGA  
CAGGGAACATAGCTTCAATCTCATCCATGGATTAGGAGTTAATG TTTTCACGCC CAAAAGTGATTTT TTT  
GCTTTCTTTGTCTACAGACAGAATAACTGCTTCGACGGTATTACCTTT TTTGAAGAGCTCTGAAGGATGG  
GAAA CTTT TTTAATCCAATCATGTCAGAGATATGGAT CAAA CTTTCGATTCTTGGCTCCAATCAACGA  
ACGCTCCGTAG TTTGTCAGATT TTTAATTTCTGCTGTTACGCGGAGGCCGATAGGATATTTTTC TTTCAAT  
GTTATCCCAAGGATTGTGT TTTGTTGTTTGGAGACCGAGAGAGATT TTTCTTTCATCTTT TTTGATAGAA  
AGAACA  
ACTACTTCGACTTCATCACC TTTATTGACCACTTCATTAGGATCTACAATGTTCTTAACCCAAG  
ACATCTCT GAAACGTGAATAAGGCCTTCAATTCCTTCTCGA TTTCAA TAAATGCTCCATAAGGAAGGAG  
TTTAA  
ACAATTTTTCGCGAACACGT TTTCTGGAGGATA TTTCTTCTCAATATCTTCCCAAGGATTATGC  
TCTT TTTGTTTGTAGGCCAAGAGCTACGCGACCTT TTTCTTTATCAACGCTAAGGATGATGACTTCCAATT  
CTTGGTTGAGTTCAACCA TTTTCGGATGGGTGACGAATGCGTTTC CATGTCTGTGTAATGTGGAGTAG  
GCCGTCAATGCCATCAAGATCCAAGAATACTCC GAAATCTGTGATATTCTTAACGATACCTTTTGC  
GACGT  
TCACCGATAGTGA TTTGCTCGATCAACTCTGC TTTCTTAGAAA TGCCTCAGCTTTCGAGAAGTCTCTTC  
TAGATA  
ACAACGTTCCGACGATCCACGTTGAT TTTGAGAAT TTTGA  
ACTCA CAAA CTTTGCTACGTA  
ATCATCTAAGTTCTTGTATCTTCTTATTGTCTATTTGGATCCTGGAAGGAAGGCTTCCATACCAATATCT  
ACGAT CAAA CCACCTTAACT TTTCCGGTAA TTTGTCCTTAAACAATAGAACCTTCTCGCAGTGAGCAA  
GAATGTATTCCCATGTGCTGTTGCTTGTGCTTTTTCCTCTGGATAAAA ACAACT TTTCTTCTCGTCATCTTC

AGTTTGGTCTAGGTAAACTTCGACTTCGGCTCCGACAGTAAACCCTTCTGAAGAGTCGATAAACTCAGAC  
ATAGGAATAACTCCCTCAGATTTTAAGCCGACATCTACAACAACAAGTCTTTGCTTATGTCAACAACCTG  
TACCTTTTAGGATCGCACCAGGATGTACTTCGCTAGTGGGTTCTTCTTCTGTGCGGGTGAAGCCATGTAT  
CGCGTAGAGAAGGTC TTTAAATTGTTAACGTCTTCTGGTAAGCAAGCTATCGTATCGAGATTCTTTT  
GCTCCCAAGTATAATCAGCTTGT TTTGGCATTAAATGATGTTCTCC TAAAAACTA CAAAGT CAAAAGA  
GTAGTGTAAATATTCACCT TAAAAAAGGCAAGATTTCCCTTGCCTACAAGTAATAAGATGCATCTCTTT  
AT TAAAAAAAGTTTCACTAGTTTCTGTGTAATTTTAGT TTTAGAT TTTGTGTGTC GAAACATTA TAAATA  
TTCCATC TAAACATCCCCATG GAAA GGACTGTCAATCCTTGAGAT TTTCAAGGATATCGGAGGGGGATGA  
ATGTCG TTTGCG GAAA AAGTCGGGTGGTTATAGTTCCTTTT TTTGTAAAAGCCGGGAACCTT TTTCTG  
TGTA TTTAAAGCTCT TTTATCTAAGTTCATATTGGGGTTCTCATGACACATG CAAAGTTAGTCATTATA  
GGCTCCGGGCTGCAGGTTACACAGCTGCTATCTATGCTTCTAGAGCACTTTTGACTCCAGTGTCTTTTCG  
AGGG TTTCTTTCTGGCATTGCTGGAGGGCAGCTAATGACTACAACAGAAGTG GAAAATTTCCAGGTTT  
CCAGAGGGAGTGTGGGGCACCAGTTGATGGATCTTAT GAAA ACTCAAGCGCAACG TTTCCGGTACGCAA  
GTGC TTTCTAAGGACATCACCGCTGTTGAT TTTA GTGTCAGACCC TTTGTTCT TAAATCTGGAGAGGAGA  
CG TTTACCTGTGATGCTTGTATTATAGCTACTGGAGCATCAG CAAAGCG TTTATCTATCCCTGGGGCAGG  
AGATAATGAGT TTTGG CAAAAGGGCGTAACAGCTTGCCTGT TTTGTGACGGAGCCCTCTCCATT TTTCTGT  
GACAAA GATTTGTTG TTTGTAGGAGGAGGAGACTCCGC TTTAGAAGAAGCCATGTT TTTGACTCGCTATG  
G TAAA CGTGTATTTG TGGTTCATAGGAGAGATACATTTGCGAGCTTCTAAGGTTATGGTGAAT TAAAGCTCA  
GGCGAAT GAAAAAATCTT TTTCT TTTGGAATAGTGAGATTGTCAAGA TTTCTGGAGATACTCTAGTTCTGT  
TCTATCGACATCTATAATAATGTGGATAAGACCACCACAACCATGGAAGCTGCTGGAGT TTTCTTTGCTA  
TTGGGCATCAACCCAACACTGCA TTTCTAGGAGGGCAGGTAGC TTTAGACGAGAATGGATACATTATTAC  
AGAAA AAGGTTCTTCTCGCACATCAGTTCTGGAGTG TTTGCTGCGGGGGATGTC AAGATAAAA TATTAC  
AGACAAGCTATTACTTCTGCTGGTAGTGGGTGCATGGCAGC TTTAGATGTGCAACGATT TTTAGAAAATT  
GAGCATTATGTTTG GTGTAGGGATAGACATTATA GAAA ATTGATAGGATTCTG GAAA TCTTATCAGACCTAT  
GGGATCGGTTTCTAAAGAAAATT TTTACGGAAGGGGAGCGGG TTTACTGCTTTTCTAAGTCGAATCCCT  
ATGCCTCT TTTGGCAGCACGTTTTGCTGC TAAA GAAGCTGTAG CAAAGGC TTTGGTACAGGCATAGGTAA  
GTTACT TAAAGTG GAAAGAAAATT GAAA TGCCTAGAGACTCTAGACAGCCTCAGGTAGTTGTTCCAGAGCC  
CTATTATGTTCTCTAGGTGT GAAA CGAGTCTCTCTCCGTAAGTCATAGTCGCGAATACGCTACGGCTG  
TGGCAATTGCAGAGTAATCAGTAATAA TAAA CAGAATAT TTTGAT TTTAACTC TTTAAGTGATTTTCAGT  
GAGCTAAGCTTGT TTTGAACAGAGCGTAGCTAACAGAAGAACACATCAGAAAAGATAGCAGCGGTATTGT  
TGTAGAGCGATGCAA CAAAGAAGAAA TAACTGACATGCTTATGATCA CAAACATACG TTTAGATAAGAAG  
GACCT TTTAATAAAAAGTCCACGGG GAAATTTCTTTA ATGAGTAGCTGAGCATCCAACCTCATGCTG TTTGA  
GCATGCT TTTACGTAGGATAAAA GCGATG TTTGATAGAGCCAGGATCCATGCTATAG CAAAGAGCTCTGC  
CGATAGAACAAGA GAAA ATTGGTAGTGCAGGGCAAGATATAGAGA TTTCACTAACAGT TTTGCTCCAGAA  
AACAACCACACAGCTAAGGGGATGCAGGCAATGC TAAACCTTGAATCATGGAGATCATCC TAAAGTATT  
TTT TAGAAA AAGAGGGAGTATGC CAAAGCTTATTGATTAGAACAAGGGCTCTTGATTAATAAGCT TTTGGC  
TTCTGATAGGATGAGGGACATATCTTGATTAGGATCCGGCAGGAAGAGGTCT TTTA TGTTGCGCTG TTTCT  
AACATATATTGTGTT TTTAGAAGAAGACCCTTCG TTTGTAGACGTCCTCAAGAGC TTTCTTTG TCAA  
TGAAGC TTTCTCTGTTCTATGCGTTGGGAAGTAGGTAAGATGCTAGGCTC TTTACTTCTCTCTGTTAGGG  
ATA TTTGGAGGGGGGTG TTTGCTA TTTCTGACGTTT TTTGCGTTCCCGGGACATCTTCTAGCGGCAATT  
CGTCCATCAAGAT TTTGGATCAACGGGT TTTGGCTT CAAAAACCTCCATCTATGTGAT TAAAGTAGCGAA  
CAAGAC TTTAGTTGTTGCTGAGAGAGGAGAGCGAGTGACCTTATTATCTGAA TTTCTCCGAATACAGAT  
CTTAATGAGCTAATACAGAAGGAT CAAAAAAACCTTCGACTTCTCGAGGGGAGATGCT TTTCAAGTTTCT  
TAAA GCAATTTAAAGAAAAGAAA TAATCCTAGAGGTTATTGG TAAA GAGAGAGCTTC TTTATGAGTTTAC  
AGAAGTTATTAGTTACAGACATTGACGGGACAATTACACATCAATCCCACCTACTTCATGATCGTGTGT  
AAA GGC TTTGCATCAACTATGATTTCTGGTTGGCAGTTATTT TTTCTAACTGGCAGATATT TTTCTTAT  
GCATATCCTCTTTTCAAACCTTTTCTGGTTCTTTCTATTAGGTAGCCAGAATGGTTCTTCCGTGTGGT  
CCTCCACGGATAAA GAGTTTATTTA TTTCTGTAGCTTGTCTCGAGAT TTTCTATGTGT TTTAGAGAAAATA  
TTTGAAGATTTAGATCTCATTGCCTGTATAGAATCTGGAGCCTCTAATCGTGATGTATAC TTTCGAAAAG  
GGATTAGG GAAAACATCTCAGGAACT CAAAGCGATTCCTGATGCTGTGTAT TTTCTACACCAGAAGCTG  
CGGACTGCTGGTGGATGTT CAGGGACATTTA TCAGAAGAAT TTTCTTATGAAGAT TTTGCCATTGC CAA  
ATT TTTCTGGTGAGAGAGAGGAAGTGAA GAAAATTATGGATAGATTTA TTTCAATCTCCAGAAG TTTCTTCA  
CAGGTAACCATGAATTACATGCGTTGGCCT TTTGATTTTCAAATACGCAAGTGT TTTACTTACCT TAAAAG

ATGTTTCAAAGGTTTGCTGTAGATCAAGTTGTTTCAGACCTTCTATAAAGAGAATAAGCCTTTTATTAT  
GGCTTCGGGGATGATGTCAACGATATCGACCTGCTATCTCGAGGAGATTTTAAATTGTTATACAGACG  
GCTCCAGAGGAGATGCATGGATTAGCGGACTTTTGGCTCCCCGGCGAAGGATCTTGGTATTCTCTCCG  
CCTGGGAAGCTGGTGAGCTGCGTTACAAACAGCTAGTTAATCCTTAGGAAACAATTCCTGGACCTATGCC  
ATCACATTGGCTCCGTGATCCACATAGAGAGTTTCCTCCGTAATTGCGCTAGCTAGGGGAGAGACTAAGA  
AGGCTGCTGCTGCGCTACTTGCTCAGCTTCCATTGGAGAAGGTAGTGGAGCCAGTCTTGGTAGTAATC  
CACCATTCTCTCAAATAATAGCTTTCTGCACGGCTAGCTAATGGCCCTGCCGAGATAGTATTC  
ACTCGGACTCCCCAACGTGCGCCGGCTTCCCAAGCCAGTACTTTGTATCACTTTCTAAAGCAGCTTTG  
CTGCGTTCATTCTCCGCCATACCCTGGAACAGCAGCATGGAAGCAAGATAAGTTAGAGAGATGGTGCT  
AGCTCCTGCATTATAATTGGGCATAATGAGAGAGAAGGCTGATAAAGGAGTAGCTGGATGTACTTAAG  
GCGGCAAGATAGCTTTACGAGAGGTATCAAGTAATGGTTTAGCAAATTCCTGGACTGTTGCTAAAGAGT  
GAACAAGAATATCAATGTGTCAAAAATCTTTTTCACCTGTTCTACAACCTTCGGATACAGTGTACCCAGA  
AAGATCTTTGTAACGTTTATTTTCCAAAATTTCTGAGGAATATCTTCTGGGGTGTCAAACTGGCATCC  
ATGGGATAGATTTTAGCGAAAGTTAGCAATTCTCCATTGGAGAGTTCACGAGATGCATTGAATTTCTA  
ACTCCCAAGATTGAGAGAAAATTTTATAGATAGGAACCCAGGTCCCACAAGTATGGTTGCGCCTGCTTC  
TGCTAACATTTTGGCAATGCCCCAGCCATACCCGTTATCATCGCCTATGCCGGCTATGAAAGCAATTTT  
CCTGTAAATCAATTTTCAACATGAGCTAACCCCATTTTGTCTTCTTGGAGAGAGGAGAGTAGCAGATTCT  
TTATTATTGAGAAAAGGGCCTCATAATACATAAAGGAGTAGATTCACTGGCTGGATCCAGGTTCTAGAGT  
AAAGAGTTTCTTGTCAAATTTTATATGGGTAGAGTTAATCAACTGTTTTCAGTGATTTATGTTTAT  
TTAAAATAATTTGTTTAAACAACCTGTTTAAATAGTTTAAATTTTAAAGTGTGAAAACAGGTTTATATG  
TAGAATTTTCTGTAAAAATAAAAATCCTTACAAGAATCCGGGAGTTAAAGGTATGTCATTTGTTATTG  
GTAGTGCTTGTTCATCTTTATGGAGCCGTTTGTGTGTTTCATCAGGCAGTGAGGGTAACAGCGAAGAAG  
AGTGACGTCTTCGGGTTTCAGACGCCGCCTCAGGTTCTGGTGCTGCTTCTGCTGTATGCCAGCAACCTACG  
AGCAGCGCTTCTACAGAAGGGAATGGTCCTAGGTACAGATACCAATGGTAGGGACGTACTCAGCTAATG  
TGCAAGCCTTGTGAATCAGGGTCATGGCGGACCGGTTTCTGTAATAGATGCTACAAAAATATTTCTGC  
TAGTGGAGTAAGTCTTACATCTATATCCATTGGAGCGGGAGACTCTGTGGATGGCCCGCTTCTTCGGTA  
GTAATTACCCAACAGCCTCAAGGATCAGGATCCTCTGCAAGAGGTGCTGGTTCTTAAATAATGGGGCTG  
TGCTTTCTGGGATGAGTACTCTTACTGGCAATAGTATTTTGACTTGTTTGAGAACTCTCAAAATACCAA  
TCTAATAGGCGATGCCGTTGATGGAACATCAACTTCTTCTCATCTCCATTGCGAGATGCAACCAAGGAGCC  
TCTACAGCAGACCTTATAGCTCTGTTTCTTGGTTTAGGAGGATCTGGATCTCAAGGTGTAAATTTCTCCGT  
TAGTTGCCACGTTACTCAGCCGATACTCTCTTTTCCAGGATCGTTGGATGCCAAAAGCTCCAAGAGTTATT  
GGAAGCTTTGAAAGAACTCATAATGACGCTCCACATCGGATGGAGCAAGACCTGGTCTAGGAGAGTGT  
TGTACGCATCTTTGTGGAGCATTATCTTCTTCCCAATCCAATTGTTAGCGCTGTGGGTATTGCTGGAA  
CGGGATTGACGGAACCTCTGATGTAGCTGCGCAAGGCCAACGTGTTCAAAATGCGCGTTATTGTGTCA  
TGATGCTTGTAAAGCCTTGCTGCGCAAGTGCCTGTGGATATCCTTCTTGGCGATGTGCTGACGGAGAAGGT  
GGCTGTGGAAGTTTGGAGCTTTAGTATGTAGTTGTGCCAAGTATGGTGCTGTCAAGAGTCTCCTGCAG  
AAGAAGCAAAATTTGGAAGAATATGCTCGTAAGCTTAAAGATTTAGAAAAGGCTGTAGGTTCTACCACATT  
CATGTTGGGACTACATAATTTAGGGATTTCTTTCTCTGATCTAGTAAAGGAAATTTTACCAATCTGCCT  
ACCCAGAACAACCTAGAGACGGCTGTAAAGACGCAGTTCTAGCCTTGGGAAGTTGATGATGCGTATAA  
CTCAAGAGAAATGGTTGGGACGCCTTTGTCTTGTGCAGGAATTTTAGATAACCCCTTCTGAAAGAGAGC  
TCTTTGACGCGGATTAGCAGGCGGTACACATATGCTGTCTCTTCAAGATCTAACATCTCGTGTAAAGTT  
ATTACATCTTACAGCAACAAGCAAGAAGCTGAGAAATTTAGATCTTGAATTACTATTGCCTGCTTTGTCTA  
GCTTGCAGGTGACAGGAACAGAAGAGGATTGTGATGACGAAGGTCAAGGGCTAAATACAGACCAGTTGAC  
CATGCTTCTTTGTAAGTTCTGCTCAGTTCTCTCCGCAGCTATAGGAAATGATCGCAGACCTAATTTGGTTA  
ACACCATAACAGATAACCGAGATCCTATGCGTCTGCATGGTAATGAGTGGTATTTCAATAGTTGGCGGAC  
CTTCTAATCAGAGTGCGGAATACCAAGAATTCAGAATACAGTCATGCAAGAAAGTTTAAACGCAATTTGCA  
ATCATCCTTGAGAGTTTCTAAGAGAAACAACAACAGAACCTCGAGCAGAAGTGCCTAAACTGGTTGTGAA  
TATGAGGCAAAAGTTCTTTCTATCCCTATTAGAGGGTCTAAGAGATCAAAATAGCAAAAGTAAAG  
ATCTTATGAGAGAATGCTTCGCTTCTTGGGCACAAGAGCAGGTGTGCAAGCTCCTCTATCTAGAAGTA  
CTTTCTTCCCTAGTATAAAGCCCCTTCTAATCAGCGGAGGGCTTTATATAATGAGACCGAGCTTCCCAT  
TCTAAGCGGAGGCTCGGTCTCTTTTGTATCGGATTCATACTATTCTTTGCTTACCGAGTCTTTAGCT  
TCCAGAACTACTTGTATTAAGACAACTTTGTTTATTTGGAGGCTTTTAAAGAGGTTTAAAGGCCATAAATCT  
GCGTAAAGGGTAAGGGTCTTGTGATGGCGTTAGAGAGGAGATTTTGATTTTTCATTGGAGAAAGGAG



AAA TGAAGGCTAAGCTAGCTGCGTGAAG CAAA GTCCGCACAACATTC TTTG GCTGTTCTTGA TTTCCGTA  
ATCCACATCCCCAACAAATAGGATGGCCGATTGT TTTCCATATGTAAGCGTATTTGATGGGTGCGTCCTGTA  
ACGGGGCGG CAAA GAAG TAAA GTGACTTGGGATAGCGGGTAAGAATCTCCACTTGGTAATCGTTATTT  
TACC GGAATTTTGATCCGTATTTCCAAA TAATACAGCACCAGTTCGACGGTAGCAGGGGCTGTATAGGT  
TGTAATGATTCCAGATTCTTGGCGTGGTTGTC CAAA TACTAGAGCAATATAGCG TTTATCTA TTTCTCGA  
TTCTTGAATAGTTGTGTAATAAGAGAAGAGGCT TTTG CATG TTTCCG CAAA GAGAATACACCCTGATGTAT  
CTCGATCTAAGCGGTGCACAAGATGAACATTGAGCTGATGAGC CAAA TCCTCGGAAGTCTGT TTTAGCAGG  
TTTA TTG TAAA TACAGAGATGCTCATCCTCC CAAA GTAATTGTGGAGAAGAGTGTTCGATGAT TTTGTAAA  
CTTACTCGGTCTCCGGGCTGCAGCTTATAGGATTCGAAGCGTTCAATGCGACCATTGACTCGGCAACCAT  
GATAGCGAACGGATTCTAAAATAGTTTT TTTA AGCAGATGAGGCAGAGAAGTCCGGA GAAA AGAAGAGAG  
CCTTATGTGGCGATCCGCTGTACCAA TAAA TTCTTGCATAATCCATTATCGATAAGTGTGTTGGTACGAT  
TTTACGAGAATTTCTATGATAAGAACAGCTTT TTTCC AAGATAAAA GAGTGT TTTCC TCTGGAAGC TTTAC  
GTTTCATGG TTTCTT GAAA GTAAA AGATCGTTCCCTTGGAGAGATTCTCCGACTCCTTATCGGG TTTGGGT  
TTCCAGAGTTATGCTTCAA CAAA CTCGAGCAGAAGTGGTGGTTCCGTATTT TTTG AAGTGGATG GAAA GA  
TTCCCGAC TTTA CAAGATCTTGC GCAAGCAAGA GAAA GCGATGTGGTGCAGCTTTGGAGGGGCTGGGTT  
ATTATCTCGGGCTAGGAAC TTGCTAGCCGGAGCTCGTGTATTACAGAGAT TTTCCGGAGGA GAAA TCCC  
AAACGA TTTAGCGCTTCTTAGCTCCATTAAGGGGATTTGGGTCTTATACAG CAAA TGCTATCCTTGCATTT  
GCATTTAAG CAAA AAAATCCTGCTGTTGATGGGAATGT TTTG CGTGTGATGAGTCGATTATTTGCTATAG  
AGGAATCCATCGATCGTATGAACACGCGAAGAGAGATCACAGGGC TTTGTGAGAG TTTGCTTCCAGATCA  
GGATCCTCAAGTCATAGCAGAGTCT TTTATCGAGTTGGGAGCAAGAA TTTG TAA GAAA CAGCCTC TTTGT  
GAACAGTGTCCGTTGCGTTTCAT TTTGTACAGCATATCGACAAGGGACTATGGAACAATACCCTGTCAGAA  
ATACACGAGCAGCTA TTTCCAGGTTA TTTCCGAGCTGTTGTGATTGT TTTGTATAAGGATCAGGCTTGTAT  
GACAAA ACGCGAAGA GAAA GAGATTATGGCAGG TTTGTATGAGTTCCCTTACTACCAGCTTCC CAAAGAA  
GATTGTTGTGATATTGAGAAAATCATTCATCTTGTTCAGAAA GATTATGGAGAGACGCTGCAT TTTGTTA  
GTAGTCTTCCCTTCT CAAA AGCAGGTA TTTACTCGCTATCGCGTTACACTATTCCCACATGT TTTCTACAC  
AAA ATATAG TTTA CCGAATAGCTACACGTTAGCAGAGCTATCAAGTCTCCCAAGCTCATCAGGACATCGC  
AGAAT TAAA GAGACTTT TTTAGTCGAGTATCATAAGTCT TTTGGAAA AAGATGGTAAGCTGTTCTGGAGAT  
AAATAAAA AATAGTCCGTAGTCTTT TTTCCGACTCT TTTGCAGCAGAGGTTTTTTTATATGAACG TTTCCAGAC  
CTTCTCAATAT TTTGAATGAAGTGTACATCCTGAATAT TTTAGTACTATGGCCCTAATGG TTTACAAG  
TTGGTAATACAC CAAA CTGCGATTTCGTAAGGTGGCGGTTGCAGTCACAGCGGATTTAGCAACTATTGAGAA  
GGCAATAGCTTGC GAAGCCAATGT TTTGCTTGTACATCACGGGATAT TTTGGAAGGGGATGCCCTATCCC  
ATCACAGGGATACTCTATCAGCGTATGCAACGCTTGATGGAAGGGAATATTAGTTGATAGCTTATCATTT  
TACC GTTAGACGCGCATAACAAGATTGGTAATAACTG GAAA GTAGCAAGGGATCTAGGTTGGGAACA  
AGAACT TTTCCGGAAGCTCTCAGCCTTC TTTAGGAGTTAAGGGAGTCTTCCCAGAAA TGGAGGTTTCATGAT  
TTCCATATCTCAATTATCTGCATACTAT CAAA CACCGGTATTAGC GAAA GCTCTTGGAG GAAA GAAA AGAG  
TTTC TTCTGCAGCGCTTA TTTCTGCGGGGCTTATCGT GAAATTTCCG AAGCTAAA AACAGCAGGTTAGA  
CTGCTTCATCACTGGTAAT TTTGATGAGCCGGCATGGTC TTTAGCGCATGAGCTGGCTATTCATTT TTTG  
GCT TTTG GACATACAGCTACT GAAA AAGTTGGTC CAAA AGCCTTGGCTCAATA TTTAAA AGGAGCGGGTT  
TAGAATCAGTTGTGTT TTTGGATACGGACAACCTTT TTTAATTAAGAAA GGCTCTATCGGAATAGCAACT  
CTTTCATAAA ACCCTCAAGTTCATTGGTAAGATTGCAAG GAAA TGCTCCTCGTTTT TTTAGATAAGAGTA  
ATCGGATAGAGAAGAATTGAAGTATGCTCGAGCCTG TTTAGAAA GAGGACGAGCGATATCTCCC GAAACA  
TTTG CGTGATAAAA AACTCTCTTCCACGATGAGATACAGTAAGGCTCTCGCAG TTTCTCC TAAA GTTGGTA  
GAGGAGAACAAGA TAAA GACCCTC TAAA TTCGAGAGACGGCACAGGTGTAGTAGGGA TTTCTTATAGTT  
GTT TTTGATGCCACTGACTCTCGTG TTTGTACATAGACAACG TTTA ATGAATACGGGGATTGTATCAACA  
GATGACT CAAA CTGTGAAGAAT GAAA CTGGTCAGCTCATTAGAATGATTGA TAAA GCTATCC CAAA AGA  
ATGACCAG TTTG TCTTAGAAGATCCTTCGAGGGGAATACAGTTAGAGATGTTCC TTTGTAGGATTACATC  
AGAAA TATCGATCTT TTTCCGAAA GAATCATGGTAACAATAGAGTACTTGAGACTCACGTACTCAA TTTCT  
ACCGCATAGGGATACTTATCGGAA GAAA GAGGATTGTGGATACA TAAA TGGCGAATCTTCGT TTTGGAAA  
GACCGGGG GAAA TATTGCCAACGGTCAC TTGAGCATGCAACTGTTGGGATAGCCACTGCTCAACAATACT  
TTCTTTT TTTATCCAGAAGTACCCTACAATAACAACAGGCTATGA GAAA TGCGCTCTTGATTAG TTTAAAC  
ATAGAAA AGGATGGTCGTAAGCACTAGATGTTTA CGATAGAGGAATAGA GAAA TATTAGGAATC TAAAA  
AAAGCCTCGTTCCT TTTGGGAAA CGAGGCTCGAAGAATCTA TTTG TTCCATTAGAGGAATTAATAGTCC  
ATTCTGCGCCAGGCATTGCTGGAGCTGCAGCAGGTT TTTCTTCTGGAATCTCTGCAATGAGAGCTTCTG

TTGT CAAAAGTAATCCAGCTACGGAAGCCGCGC TTTCTAAAGCAGAACGGGTTAC TTTAGCAGGATC TAA  
AATACCAGCTTCAAGCATATCTGTGTATGCATCACGCAATGCATCATATCCTTCGTTCCGAGAACGGGAC  
ATAACTTGTTGGAAGATGATAGCACCTTCT TTTCTGCG TTTGCAGCAA TTTGTTTCAAAGGAGCG GAAA  
GAGC TTTCAAAAACAATGCGAGCTCCAA TTTGCTCATCTTCATTAGTCAACATTGGCAAGAAGGCTTCAAG  
AGTAGGGATAACAACGGATTAATGCTGTTCCCTCCACCAGGAAGAATTCCTTCTTCAACAGCAGCGATTGTA  
GCATGTTGAGCATCGTCTACACGATCTTT TTTCTC TTTTCATCTCAATCTCTGTTGCAGCTCCAACGCGAA  
TGACTGCTACTCCACCAGAGAGCTTAGCAAGACGCTCTTGAGGTT TTTCTTTA TCGTAATCAGAAGAGCT  
GTCTTCAA TTTGTTT TTTGATGC TTTGCAACGAGCTTC TAAA GCTTCTTTTTC ACCCATTCTTCGACG  
ATGGTCGTGTCTTC TTTAGAAA CGATAACTTT TTTAGC TTTA CTTAACATAGCTAAGTTAGCGT TTTCTA  
A TTTTCATGCCAACTCTTCGCTAATGAGTTGACCGCCAGTTAAGATAGCGATGCTTCCAACATAGCTTT  
TC TTTCTATCTC CAAA GCCTGGAGC TTTA ACTGCG CAAA CCCGGAATCCTCCACGAATTTCTGTTACGACC  
AAA GTAGC TAAA GCTTCGCCTTCAATGTCTTCTGCTATAATAAGAAGAGGACGGCCGGATT CAGCAACTT  
GTTG TAAA ACAGGAAG GAAATC TTTG ATCCCA GAAAT TTTCTTATCGTAGATTAGAAC CAAA GCGTCTTC  
TAATACACATTCTTGAG TTTCTGGATTTGTTGCGAAGTAGCTAGAGAGGTAACCTCTATT GAAA TTCATT  
CCTTCAACAACATC CAAAACGG TTTCAAATCCT TTTGCTTCTTCAACAGTGATAGAGCCGTT TTTA CCAA  
C TTTCTCCATTGCTTCAGCAATCAGATTCCCAGATTTC TGCATCATTATTAGCA GAAA TTGTTGCAACTTG  
AGCAA TTTCTTTA TGATGCTGAACAGGCTTGCTGATTTT TTTGACTTGATCAACAACAACCTTAACAGCT  
TTATCAATACCTCG TTTGAGGTCCATTGGATTTG CTCCAGCTGTTACATTGCGTAATCCTTCTGTATAGA  
TAGCTTCAGCAAGAACAGTAGCTGTTGTAGTTCCGTCTCCAGC TTTGTCAGCAGT TTTGCTGGCGACTTC  
TTTGACCATTTGAGCGCCATAT TTTCATGTTTG TCGGCAAGCTCAACTTC TTTGCAACGGTAACACCA  
TCTTTAGTTACTTGAGGGATCCGAAGCT TTTA TCTATGACAACATGTCGTCC TTTAGGCCCTAGAGTGA  
CTTTTACAGCTTCAGC TAAA GTCTTAACTCCTT TTTGAAT TTTCTTTCTGGCTTCTTCGTTGTAT TTTAAT  
GTTTTTAGCGACCATTGATGCGCTCCT TAAA TCTTACTTCACTCTCTTAGTT TTTA TTGCAGAACTGCGA  
TAACTTCGCTCAT TTTGAACGATGACGTA CTCTTACCTTCGACAGTGAGTTCTTGCCAGAATA TTTATC  
AAT TAAA ACGATGTCACCAACCTGAACTT CAAAAGGAAGTTGCTGCC TTTATCATCTTTTTTG CCTGTT  
CCTAGAGCTACAACCTCAGCTCTATCTTGCTT TTTCTTGGCAGTGT CAGGAAGAATGATTCCGCCTCTTG  
CAGTGAAGCTTCTTCTCTCT TTTAAC TAAAATTCTATCTCC CAAAGG TTTAATCTTGAGGGTCTGTTG  
TTGATCTGACATG TTTAAGCTCCTCGTATTTT TATTTCTATGAGGCCCGTGGTCCGGCTTTG TTCCGC  
TACCAACGTAGGGAT TTTGAACGATAGAACGTT CAGAGGAAGAACGATAG CAAA GTCTTCGCTTT TTTGCA  
ACTGG TTTAGCAGTTGGCATGATCAACTGCTATT TTTAAAAA TTTA TAGCAAGCTAGCTAGTTCTTCCAG  
CTTCGTTTCGATGTAG GAAAAGGC TTTAAGCATAGGAGCTGATGAGGTCATATCCAATCCAGATTT TTTCT  
AAAATTTCTGATAGG GAAATCGGATCCGCCGTACG CAAA AATGTGAGATATGCTTCTTGAGCACCTTCTT  
CTCCAGAAA GAATTC TTTTCAGAAA AACACAACGATGCAATGATTCCAGTGGCGTATTGATAAA CATAGAA  
GTTGTAGTAGAAA TGAGGAATGCGAGCCATTGATACAGCTATGTTTCAT CAAA AGTTATGCAATCGCCA  
TAAA ATAGGCGCTGCAG TTTCTCGTAAC TTTGAGAAA AGAATTCTTCAGTTAATGGGAGACCTTGTTCGG  
CTGCAGAA TGCA TTTCTCAGCT CAAA AGCAGCAA TAGTG TTTGTCGGAATAAA GTTG CAAA AACAGTGTC  
TAGAGAGCGA GAAA GAATAGCAATCTTCTCTTCT TTTAGACGGAGCTTGT TTTAGCA GAAATTCATCAAT  
AGGG TTTCTATTGAGGGTTGAGGCGA TTTTCAGCTA GAAA AATCGGATACTGAGCTTCATGATAAC TTTGAT  
G TTTATGACTCAAGAATGAGTGCATACTATGACCACCTTCGTGCGCAACTACCGATACTCGTATAACGT  
TCCTGTATAATTGAGAAGAATGTAAGG TTTGCTGTTATAACCCAGACGAATATGTCCTTGAGCG TTTG  
TTAGTAT TTTCTATA TTTATCTACCCATCCATCGGAAGTGAGACC TTTGCGTAGAGTCTCTACATAATCGT  
TCCC TAAAAGGGGACAAGCTATCGCAGATCAGAGTGACAGCTTCTTGATAAGAATAATGGCGTGAAGCTTC  
GCTAGCGACCAACGGTGCCTAGACATCATAGAAA TG GAAATCTGAGAGACCAAGAGCTT TTTGTTTTAAC  
TGAAAATACTTAGTGATCAGGTGTGTGTGTTG TTTAACGGTATCAATGAGCGTGGTAACACAGAAGTGC  
TGATATCATTCT GAAA TAGTGCTGCTTC TAAA CAAGAATCATAATCGCGAGCT TTTGCATTGAATAGATG  
GGCTTGAAT TTTGCCATT CAGTAGATTCCGCGAGAGA TAAACGATAACCCGTGATGGCGTTGACATTT TTTCT  
TGATAAGTGT TTTGCGTAGCTCCCGATCTGTAGATTGCATGTATAGAGAAGCTAGAGCGTGAGAAA GGG  
GATGAGAT TTTA CTTTCGGAGTCGACAGCTTCCC CAAAAGGAA TTTCA GAATCTGTTAAGCTA CAAA AAGT  
TTTA TAGGCTACTTCCAATGCAGG GAAA GAAGACGCTAGGATTT TTTCTTCTCGAGAAGTTCTGTGTGC  
GGAGC TAAA CCGAATAGTTT TTTCAAATAGAAA TGGTATTCCTGAAGTTCCGGGAGAGGCTAATAGCATAT  
TAGCCACTTGCTGAGGGAGGGCGATAAGGGCCGGTTGAATCCAA GAAATTTCTCTA CAAA ATGATGTGAG  
CAAGAAGGTAATAGA TTTTCAGATCAGCTGCGGCTTCTTGATTTCGCAATATCCTCATCATGAGTAAGATGA  
GCGTATACA TAAA GTTTATC CAAA GTTC TTTCAAATA GAAAAGACTGTGGTTAGCAGCTCACGAAGAGAAG

AAGGTTGTTTTATATCAAAATTGTTTTCGCTAAGGTGAGGC AAAATGGAGCTCCTTCAGCACCTACTTT  
TTTTAATTCGTCTTGCCAGACTTCACGACTCGCATA CAAACTTTTCGTATCCCAGCAGTCA GAAA GAGGA  
ACATCTTTTC TAGAGCGTAAAGCTGTTTG TGAAGTAGTAGCAGTGGTCATGAATCTCTCCTTAGAGGAAG  
CTGTTTATGCTTGTGTCAGCTAAA TCATCAGCTCCTTGTTAGGATAGCCAGTAAGGAGAAGAGAGTTAG  
CTGTTTC TTGATCAAAGAGAGCAGTTTC GATCAAGATCGATTTCTAATCAAGTTT TTTGCCTGTAGTTT  
CTGTGATCAAA TGATCTTAGCTCTTTA TTGACTGTAAGAGAATTAATCTGTATGGATATAAGGTCGTCT  
TTA TTGATCGATGTGATTGGCAAGCCTTCTCAGATTGATAGCC TTTGTAACAGGTGTGATAAAAAGGTATT  
TATGGAGAAATTTTCAGATGCAGTAAGCGAAGCCTTAGAAAAGGCGTTTGAGTTAGCTAAA AACTCTAAG  
CATTCTACGTGACA GAAAACCA TTTGCTGAAAAGTCTTTTGCAAAATCCAGGCTCCCTATTTTGTTTGG  
TCATTAAGGATGTGCACGGTAATCTTGG TTTGCTTACTTCTGCTGTGGACGACGCCTTACGCAGAGAACC  
AACTGTAGTCGAGGGAACCGCTGTTGCTAGTCTTCTCCAAGTTTACAGCAGTTGTTGCTCAATGCGCAT  
CAAGAAGCTAGAAGTATGGGTGACGAATATCTATCAGGGGATCA TTTGTTACTAGCTTTTGGCGATCGA  
CTAAA GAGCCTTTTGCTTCTTGGAGAAA AACTGTAAA AACTACTTCTGAAGCGTTGAAA GAATTAATTAC  
TAAATTAAGACAAGGAAGTCGTATGGACTCACCTAGTGCTGAA GAAAATCTGAAA GGATTAGAGAAA TAC  
TGCAAAAATTTGACTGTACTTGC AAGAGAAGGCAAGCCTTGATCCTGTGATTGGTCGAGATGAAGAGATTA  
GACGTACGATACAGGTTCTTTTC TAGACGAA CAAA GAATAATCCTATGTTGATAGGGGAGCCCGGAGTTGG  
GAAAACAGCAATCGCTGAAGGACTTGCTCTTCGCATAGTGCAAGGGGATGTTCCAGAGAGTTTAAAGGAA  
AAGCATCTGTATGTACTGGATATGGGAGC TTTGATTGCAGGTGCCAAGTATCGAGGAGAGTTTGAAGAGC  
GGTAAAAAGTGTATTGAAGAGTGTAGAAGCTTCTGAAGGCGAGTGTATCCTATTTCATTGATGAAGTGCA  
TACTTTAGTAGGAGCGGGAGCTACAGATGGAGCTATGGATGCAGCGAATCTAT TAAAGCCTGCTTTAGCA  
CGAGGCAC TTTGCATTGTATTGGCGTACGACTTTGAAATGAATAC CAAA AATATATAGAGAAA GACGCGG  
CTTTGGAACGGCGTTTC CAGCCTATT TTTGTAACAGAACCTTC TTTGGAAGATGCTGTATTTCATTCTCCG  
GGGGTTAAGG GAAA AATAT GAAA TTTTCATGGTGTGCGCATTACAGAAGGGGC TTTGAATGCAGCTGTA  
GTTCTTTCTTATCGTTACATCACAGACCGATTTCTTCCTGATAAGGCGATTGACCTAATTGATGAGGCTG  
CGAGTTTAATCCGTATG CAAATAGGAAGTTTACCTCTGCCTATTGAT GAAAAG GAAA GAGAATTATCAGC  
TTTAATCGT GAAA CAAGAAGCTAT TAAACCGGAGCAAGCACCAGCTTATCAGGAAGAGGCTGAAGACATG  
CAAAAAGCAATTGACCGGGTTAAGGAAGAGCTGGCCGC TTTACGCTTGCCTGGGATGAAGAAA AAGGAT  
TAATTGCAGGAT TAAAAGAAAAGAAGAATGCTTTTAGAAAATTTAAAATTTTGCCGAAGAGGAAGCTGAGCG  
TACTGCCGATTACAATCGGGTAGCAGAACTACGCTATAG TTTGATTCTTCTTTTG GAGGAAGAAA TTCAT  
TTAGCTGAGGAAGCTTTAAATCAAAGAGATGGGCGCCTGCTTCAAGAGGAAGTTGATGAGCGGTTGATTG  
CGCAAGTTGTTGCGAATTGGACTGGAATCCCTGTG CAAAAAATGTTGGAGGGAGAATCTGAAAAGTTATT  
GGTGTGGAGGAGCTTTTAGAAGAAA GGGTGTGCGGACAACCTTTTCGCTATTGCCGCGAGTCAGTGATTTCG  
ATTCGAGCTGCTCGAGTAGGATTGAGTGATCCGCAGCGTCTCTAGGAGTGTTTC TATTTC TTGGACCTA  
CAGGAGTAGG GAAA ACTGAGCTTGC TAAAGCATTAGCAGAGCTTTTATTTAATAAGGAAGAAGCGATGAT  
TCGG TTTGACATGACCGAATATATG GAAAAACATTCCTGTTTCCAAA TTGATAGGATCTCCTCCAGGGTAT  
GTAGGATATGAAGAAGGAGGGAGTCTCTCAGAAGC TTTAAGAAGACGACCTTATTCTGTTGTTCTTT TTTG  
ATGAGATA GAAA AAGCAGATAAAA GAAGTATTTAATATTTTATTGCAGATTTTGTATGATGGGATCTTAC  
GGATAGCAAGAAGCGTAAGG TAAA TTGTAAGAATGCTCTTTTCATTATGACAT CAAA TATTGGTTCCGAA  
GAGCTTGCTGATTATTGTACTAA GAAA GGAACTATCGTAGA CAAA GAAGCTGTGTTATCTGTTGTTGCC  
CTGCGCT TAAAAATTAT TTTAGTCCAGAA TTTATCAATCGTATCGATGACATTCTGCC TTTCTTCC TTT  
GACTACGGAAGACATTG TAAAAATGTCGGTATT CAAATGAATCGGGTGTG TTTACGTTTGCTG GAAAGA  
AAAA TTTCTGTTAACTTGGGATGATTC TTTAGTGCTATTTCTCAGTGAGCAAGGTTATGACAGCGCTTTTG  
GAGCTCGCCCTCTGAAGCG TTTGATACAG CAAA AAGTAGTGACTATGTTGTCT TAAAGCTCTTTTGAAAGG  
AGATAT CAAA CCTGGAATGGCGGTAGAGCTTACTATGG CAAAAGATGTAGTTGTG TTTAAAAT TAAAACA  
AATCCAGCTGTGTAGGACG TTTGTGTGTTTGGCGCATTGGATGTGC TTTATTGGGATAGGCAGTCTTCTG  
TTACCGACCGCTCTGCGAGCGACTGAACGGATGA GAAA GGAGCCTATCCCGCTCCTAGATAAGCAA CAAA  
GCTTTTGGAATGTAGATCCTTATTGTCTGGAATCTATATGCGCTTGT TTTGTAGCGCATCGAGATCCTTT  
GAGTG CAAAACGGTTAATGTATCTG TTTCTCAGCTCTCAGAAGAGGATGTATCTGTT TTTGCTCGATGC  
ATTTTGTCTT CAAA GCGTCCAGAATACCTTT TTTCAAATCGGAGGAAGAGCTC TTTGCAAAAATTGATTT  
TGCCAAGGG TTTCTCTAGGTGTTTCATCGGGACGATGATTTAGCGGAGAGTGTGGTGTAGCGGAGCCTTC  
TGCGGAAGAG CAAAAGGCTCGATACTATTCAATTGTATCTGGATGT TTTAGC TTTGCGTGCATACGTT GAA  
AGAGAGCG TTTGGCGAGTGTGCACACGGAGATCCTGAGCGGATAGATTTTG GCAACCATAGAAGCTATTA  
ATACCATCCTTT TTTTCAGGAAGAAA GATGGAGGTATCCTT CAAAACAAGAGATG TTTGAAAGCAGGT TTTTC

TGAGTTAGCTGCTGTTACAGATAGTAAGTTTGAGTTTGCTTGGGAAGCTGTAGTGC TTTATCAAGCTGTC  
GCCAGCGGCTTGA TTTGTCTCTGGACCCTGTCACCCCTCCTGGACATA TTTA CTTACGCTATAAGGACA  
AGG TAAA TATT GAAA CCACTTCTGGAGGAAGGCATCTTCCTACT GAAA GGTATTGTGAATGCA TAAA AGA  
GTCGCAGT TAAA GGTGCGTTCGCAGATGGAGCTTATAGGGTAACT TTTATGAATAGAGGAGC TTTCTTT  
TTGCAAAA AAGGAGAG TTTCTTCAGGCGTCCTTAGCTTATGAGCAAGCTCAATCATA TTTATCAGACGAGC  
AGAT TTTCTGATTTG TTAGGGATTACTTATGTTCT TTTAG GAAA GAAGGCGGCGGGAGAGGCTCT TTTAAA  
GAAA TCTGCAGAAA AGACTCGGCGAGGGTCATCTATCTATGACTA TTTCCAAGGATATA TTTCCCCGAA  
ATCCTAGGGGTGTTG TTTGCCGATTCAGGGGTGACCTATCAAGAAA CTTTGAGGTATC GAAAAAACTAG  
TGATGC TTTCCAAGAAGTATC CAAA AAGTGGATCTCTTAGGTTGAGGTTGGCGACAACAGCATTGGAGCT  
AGGGCTGGTTAAGGAGGGGGTGCAGTTGTTAGAAGAGAGTGTAAAGGATGCCCCAGAGGACCTCTCT TTTA  
CGTCTGCAGT TTTGTAAA ATTC TTTG CAATCGACATGATTATGTCCGAG CAAA ATATCATT TTTG ATCAAG  
CGCAAGCTCTTCTCAT TAAA GAGGGGTTGTTTTC CGAAA AACTTCTATACTCTCT TAAAACTATCGG  
GAAA AAGCTATCTCTTGTGCTCCGAGT TAAA CCGAGCCTTCTAGCTAT TTTGTAAA TATTTTAA CAATT  
TAGATTCTT CAAA GCTCAGCGAGGGCGTGAAGAATCTTGTTCAGGTGTA TTTGAAA AAAGTTTGT TTTAA  
ATAGTTTT TTTAGT TAAA ATGGGTCCC TAAA TAA TTTAAATCCGGTAGTTTTTGC GTCCGAAA CATTTGT  
TTATAAGTGAGAAA TGAGATCTGGC TAAA ATCTGTGCAAGTGAGG TTTATGACGAAGG TTTATGCGCATA  
GCATTCAGCAAGAGAGAGTGTGGATAGGATAGCTCT TTTAGAGAGATGCTTAGATCTGAGTAATT CATT  
GCCGACAGC GAAA AGATTGGCGGCAGTTGCTGTGGCCACTATATTGGCCATCGCTCTTCTAGTTGTTGCG  
GGCTTGTGTTCTCTGGAGTGCTCTGTAGCCCTG TTTCTGTTGTAGCGGCATC TTTA ATCTTCGGGGTAG  
GAGC TTTCTTTTAGGAGGAGC TTTG GTTGGAGGAGTGTGACTACAGAAGCTGTGACTAGAGAGCGGTT  
GCATCGATCACA AAC TTTGATGTGGAACA ACTTATGCTG TAAA ACAGCAGAGGTTGAGCAGAAA ATCTCG  
ACAGCTAGTG CAAA TGCCAAA AGCAATGATAAGCTC GAAA ACTCGGTGAG TAAA AAAGGGGCGAGC TAAA  
GGCGAGTCCGGT TTTAAAGATTAGCCTCATTGAGAGGCTGT TTTAAGAGTT TTTAGGAGGCTCTATGGA  
ATGCGT TAAA CAGTTATGTAGAAA CCATCTACG TTTAGACA ACTTGACGGATCCTGTGCGCTCGGTGTTG  
ACGAAA GGAACA ACTGCAGAAA AAGTTCAGCTAGCAGCATGCTG TTTAGGAGTTG TTTGTTTCGATTATTT  
GTTTAGCT TTTG GGAATCGCTGCAGCGGCAGTGGGTG TTTCTGTTGGTGGATTTG CTCTTGATTGGGTAT  
TATCGCCATTCT TTTAGGGATTGTATTG TTTG CAACATCTGC TTTG GATGTTCTAGAGAATCATGG TTTG  
GTGGGATGTCCATTTAAGTTGCCATG CAAATCGAGTCCAGCTAATGAACCTGCTGTACAATTC TTTAAAG  
GTAAA AATGGAAGCGCAGACCAAGTGAT TTTAGTAACTCAATAAGACAATGGGAGACGTGATGATACAGA  
GCGT GAAA ACAGAAA GTGGGTTAGTTGATGGTCATCACGGAAGCTGTGATTC TTTGGGATGTGTGGTGGG  
AGCGCTAGC TAAA GTTGC GAAA CTCTAGTTGCTCTCGCCGCTCTTGT TTTGAATGGGGCTTTG TGTGTT  
CTTTCACTGGTTGC TTTATGTGTGGAGCTACTCCTGTAGGGCC TTTAGCCGT TTTAGTAGCGACAACAC  
TGGCAGCTTCTGTGTAGCTTATGT TTTGTTTA TAGCTGCTAAGGATCGGGATGGATCGCTTCTAC  
AAA TAAGTGCTAGG CAAA ACTC GAAA AGCAGACTTCTCTAGGCTCTGCTAGCTTT TTTAATGACAA GAAA  
CGAAATTTGATAAA GGGATAGGGGGATACATGATCTGTTGTGA CAAA GTCTGTGTCGAGCGTACAATCAAT  
GCCTGTTATAGATAAA TGCTCTGTAAC GAAATGCTTA CAAA CGGCTAAGCAAGCAGTTGTTCTTGCCTG  
TC TTTGTTGCGGTG TTTGCTTCAGGAAG TTTATCCATATTATCAGCGGCGGTACTG TTTAGTGGCACTG  
CTGCTGTTCTCCATATCTGCTGATATTAACAACAGCTCTTCTAGGATGTG TTTATGCTGTTATTGTGCT  
TTTAAGAAG TTTATCAGCAGTTGTTTCAGAGTTG TAAA AAGAGATCACCTGAA GAAA TTGAAGGGGCTGCT  
CGTCCCCTGATCAGCAGGAATCAGGAGGACG TTTG TCCGAGGAGAGCGCTTACCACAAGCATCTCCTA  
CTTCGTCTACT TTTG CGTCTTGAATCCGCT TTTGCTCAATAGGAGATAGTG TTTCTGGGGCATTCGATGA  
TATAAA TAAGGACAACAGCCGTTCTCGATCACGCTCCTTCTAAGGATGACATGTGATTCGCGTAG GAAA  
AGAGGAGGGAGACCTCCTCTTTTT TTTATTTTG TAGAGTTCCGTTACTATTGGCACCCTGTGTGCAGTT  
AGGATGAGTAGACTAGTTCTGCAGCCT TTTACAGGGTGTATGT TTTGCATTG CAAA AAGCTCCTAAGAC  
TAGGAGCTTT TTTGTAGAGGGTGATGCAGACTTTCTGGGGGAGGAGAGCGTCTCTCTTATCTGGGAACACA  
GATCTGAGCTCTCT TTTGTTGTAATGCAATTTGACTGGTAAGAGT TTTAGAAA GTTGT GAAA GTTGTCC  
AA TTTCACTCGTAAGCTATCACGAATTGTT TTTA ATCTTCAATAGCCGCTGTTAATGATTCTCGGTTA  
TGCGCTAATCGGCGAACTTCTTCTGCTAATGGGGTTAGGAATCGGA TTTCTCTCTTAAATGAGGCAACAG  
AGCC TTTAAGATCTGCTATGAT TTTCTTGC GAAA AGAG TTTGCGCAT TTTCTTCTGTAGAGTT TTTA TACTC  
ATC CAAA AGAGATT CAAA ACC TTTA TAGTTATCTC TAAATCCTTG CAAA CAAGAA TAAA AATCTTGAGAT  
ACAGCAGAGAGGTC TTTAGATGTGCTTG CAAA TTC TTTAGATAAA TGAAGAAA TTC TTTCTGTAGAACGC  
TCAGCAT GAAA ATAA TTTCTTTTA GAGACCCA ACTTCTCT TTTG CAGATCCTGGTATAGATGTAGATTAGC  
GGT TTTCTGTAGATAAA GAGCATTCCTGCTAATGAGGTAATGAATAGGGCAAGAAGAACAATAGTGAT T

TGTTGGAGCGATCAGAAAGCCAAACAAGATGTCCCAAAAGAGCTAAAAGCCTATTGTGCCTATAAGAATTA  
GGGAGGCAATGGCTGCTATTTCTTAATTTGTCCATCAAGAAGGTTGAGGTACGCGATTGGCTGAGTA  
GGAAGGTGCAGGGGAGATGGAGGAGTCACGATTAGAGTAGGCGTTGTCATAGGCACTTCTCATTTTAA  
GTTCTCTGAAACCAGATCCTAGGGCTTTATATGATAAAAATTCTATGTAAAAACCAGCTTACATGTATTT  
CTAAAGCATTGTGCATTAATATTGTGACTGGATTAACGATCAATTTCTGCATATAGGACAGAGTAGAACA  
TGTTGCATTGGCGATACGAAAGCACTGATTGCTATGGAGGGATTCAAAGAAAATTCCTGTCTGCGCAGTGC  
AGAATCGCTTTTGGGGTGTGCCTGTCTGAAATGTATGTAAAAGAGAAAAGGAGGATAGAGGGAAAATCTTA  
GTTCCCCAAAAATAATTGCCATTGTACTCTCCTTCTTATCATAGAGAGTTAAAATTTTGACCACAAG  
ATTGAAGTGTACGTGCGTCATCTCTACAGAAGGAAATAAGAGAAGAGGCCATGAAAACAAGGGGTGTT  
GGTAGCTCCATCTATTATGGGAGCTGACTTAGCTTGCATAGGAAGAGAAGCGCGAAATATAGAAGAGTCC  
GGAGCAGATCTTATTCATATAGACGTTATGGATGGACATTTTGTCCCAATATTACTTTTGTCCCGGAG  
TTGTTGCTGCGATTAATCGGTCAACAGAGCTAATTTCTGGAAGTTCATGCTATGATTTATACGCCCTTTTGA  
ATTTGTAGAGGCTTTTGTAAAGGCCGGGGCGGATCGTATCATTGTGCATTTTGTAGGCAGCGGAAAATATT  
AAAGAAAATTATTAGCTATATTCAAAATGCGGAGTGCAAGCAGGGGTAGCTTTCTCTCCAGAGACTTCTA  
TAGAGTTTGTACATCTTTTCATACCTCTATGCGATGTCATCTTGTCTGTGCATCCTGGTTTTTGT  
TGGGCAAAAGTTTCATTCCTGATACGATAGAAAAGAAATCAATTCGTAAAACAAGCTATACAAGTCCTAGGA  
AGAGAAGGAAGTTGCTTGATTGAAGTTGACGGTGGTATTGATAAAGAGTCTGCACGAGCATGTAGGGAAG  
CAGGCGCAGATATTTTGGTTGCAGCCCTCTATTTTTTTTGTAGAAAAGACTCTATAAAATATGAAAGAAAAGT  
TTTTTTACTTCAAGGGGAAGAACATGGTGCTAAGTAGCCAACCTCTCGGTAGGGATGTTTTATCTCTACAAA  
AGATGGCCTATACAAAGTAGTTTCTGTTTTCGAAAGTCTCAGGAAACAAAGGGGATACTTTTATTAAGTA  
TCCCTGCAGGCCGCTGGATCAGACGTGATAGTCGAGAGAAATTTTAAAGCGGGCAAGAGGTCAAAGAGG  
CTCAGTTTTGAGCCAAAGAAATTTAGAGTATCTATATCTGGAAGAGGATAAAATACCTATTCTTAGACTTAGG  
GAATTACGATAAGATCTATATTCAAAAGAAATTTGAAAAGACAACGCCATGTTTTTTGAAAGCAGGTGTT  
ACCGTCTTTTGTTTTAGTGCATGAAGGCACTGTTTTTTCTATGGAGTTACCCCATTTCTTTGGAATTAATGG  
TTGCTAAAACAGATTTCCCTGGAGACTCTTTATCCCTTATCAGGAGGAGCCAAAAGGCCCTTTTGGAAAC  
AGGAGTAGAGGTTTTGTACCCTTTTGTAGAAAATAGGAGATGTTATTAAGGTCGATACGCGTACTTGT  
GAGTATATTC AACCGCTCTAAAATTGGGGATAGCATGGATTTTAAAGCAGATAGAAAAGCTCATGATTGCTA  
TGGGCCGTAATAAAAATGAAGCGCATTGTTATCAAGCGTGAAGGTTTTGGAGTTAGAGTTAGAAAAGGATAC  
AGTCCCAAGTATTCAGGAGCCAGTCTTTTTATGATAACAGACTGTTTTGCTGGATTTTCCAAGAAAAGACCT  
ATTCTACAGATCAAAACCTTGGGAATCCTATTGTTAAAGAGAGTATCGAGAAGAAAAGAAAGTGAGGCGC  
CTGCTCAGGGAGATTTTTATTGTTTTCTCCGCTGGTCCGCACTTTTTATGGCTCTCCTTCGCCAGAGGCTCC  
GGCATTATTAAGCCTGGGGATACTGTTTTAGAGGATACCCTGTTTTGTATCGTGGAAGCTATGAAGGTA  
ATGAACGAGGTAAAAGCAGGAATGTCGGTCCGCTAGAAAGAAATATTGATTACTAATGGGTGATCCAGTCC  
AGTTTTGTTCTAAGTTATTCGATAGTTAAGGCTTAGTTAATGAAAGAAAGTATTGATTGCAAAATAGAGG  
CGAGATAGCTGTTCCGATTATTTCGAGCATGTCATGATCTAGGATTAGCTACTGTTGCTGTATATTCTATG  
GCGGATCAAGAAGCTTTGCATGTGCTTCTGTGCTGACGAAGCTGTTTTGATTGGAGAAGCTCAGGCAGCAA  
AATCCTACCATAAGATCGCCAATATTTTAGCTGCTTGTGAGATTACTGGGCAGATGCTGTGCATCCTGG  
TTATGGTTTTCTTAAGTGAAAATGCAAACTTTGCTTCTATATTTTGTGAAAGTTGTGGGCTCACATTTATCGGT  
CCTAGTGTGAGTCGATAGCGACTATGGGAGATAAAGTCCGACGTAAGCAGTTGGCTAAAAAGATTAAGT  
GCCCTGTAATCCCTGGATCTGAAGGTGTGGTGAAGGATGAGGTGGAAGGGATTAGAATCGCAAGAAAGAT  
CGGATTCCTCATCGTCATCAAAAGCTGTTGCTGGAGGCGGTGGACGAGGAATACGGATTGTTAGAAGAAA  
GACGAATTCTATAGGGCTTTTACTGCCGCTCGGGCTGAAGCAGAAGCGGGATTTAATAATCCTGACGTGT  
ATATTGAAAAATTTATTGAAAATCCAAGACATTTTGAAGTTCAAGTAATTGGAGATAAGCACGAAATTA  
CGTGTATCTTGGAGAACGAGATTGTACAGTACAAAGGCGTCCGCAAAATTAATAGAAGAGACTCCAAGT  
CCTATTTTAACTCCAAGAAATGCAAGCTAAAGTTGAAAAGTAGCAGTGGATTTAGCTCGGAGTGCCGGGT  
ATTTCTCTGTTGGAACAGTAGAAATTTCTGTTAGATAAGGAGAAGCGTTTTTATTTCTATGGAGATGAATAC  
GCGTATCCAAGTGAACATACTATTACGGAAGAAGTGACAGGGATCGATTTTGTAAAAGGCTCAGATTAGT  
GTCGCTAAGGGAAGAAAAGCTGCCTTGGAAAGCAAAAGAATATAGAGTTTTAAAGGGCACGTGATTCAATGCC  
GAATCAATGCAGAGGATCCAAGTAATAACTTTTACTCCTTCCCCTGGTAGATTAGATTATTATCTCCCTCC  
TGCAGGTCCTGCTGTGCGAGTAGATGGGGCTTGGCTACAGTGGTTATGCGATACCTCCTATTATGATTCC  
ATGATTGCTAAGGTAATCAAAAAGGAAAAGAAATCGAGAGGAAGCGATAGCCATTATGAAAAGAGCTTTTAA  
AAGAGTTCCATATTGGTGGGGTGCATTTCTACAATTCCTTTTCATCAGTTCATGTTGGATAATCCGAAGTT  
CTTCTTTCTGATTATGATATTAATTACGTGGACCAGCTTTTAGCGTCTGGTAGCACCTTTTAAATTTA

GCTGATGGCAGCTAACTATTTTTTTTATTATGTAAATCATGATTCAAGAACTTCCC TAAAATATTTTTC  
GAAA GAAGTGTAGAAGTGTAAAGGCTGTT TTTGAAGG CAAAA GAAA AGAGATCTT TTTGAAA TTTTTC  
TTTCTAAA TTTTGAAGG CAAA TACAGCTGCTT TTTGTTTGGAAA AAATAATCAT CAAAATTATAATC  
ATTCCCTCTGATAAGGTGATTTAAAGTTATG GAAA AAA GAAAAGATAC GAAAACGACCCTAGCTAAGGCTT  
CGGACGATC GAAACAAA GCCTGGTATGTAGTTAATGCTGAAGGGAAGACCTTAGGGAGATTATCTTCAGA  
AGTTGCGAAGATCCTGAGAGGTAAGCATAAGGTGACT TTTA CTCTCACGTAGCGATGGGAGATGGTGTG  
ATTGTGATCAATGCTGA GAAA GTGCG TTTGACTGGCG CAAA AAGAGCTCA GAAA GTGTACTACTATTACA  
CAGGC TTTATTTCTGGGATGCGAGAAGTTCCT TTTGAAA ACATGATTGCGC GAAA GCCTGCTTATGTTAT  
CGAGCATGCTGT TAAA GGAATGTTGCC TAAAA CAAA ACTTGGAAAGACGT CAAAT GAAA TCTTTAAGAGT  
TTGAAA GGTAGTTCTTACGCACAGTATGAAGCTAT CAAA CCAATTGT TTTA GACGCGTAATTTGGGGTAA  
TTTG TGA CAAA GAATATGATACAAGAGTCTGTTGCAACAGGCAGAA GAAAGCAGGCTG TTTCTAGCGTTC  
GTCTTCGTTCTG GAAA TG GAAA AATTGACGT AAA TG GAAA GAC TTTA GAGCAATA TTTCCCTCTTGAAGT  
T CAAA GAGCAACTATCTTAGCTCCGCTCAGAATGCTCGGTGATGTC AATAG TTTT GATTTG ATTATCCGA  
GTAAGTGGAGGAGGGTTCAAGGTCAGGTTATTGCTACTCGATTGGG TTTAGCTAGAGCTGTTCTGCAAG  
AGAAA GAAGACA TAAA GCAAGAATTGAAGGCTCAAGGCTTCTTGACTCGAGATCCCTCGTAA GAAA GAGCG  
TAAAAAATACGGTCGTAAGAAA GCTCGTAAGAG TTTT CAATTCTC CAAA CGATAAGCTATTGCTTGTCCA  
TATATTGGAGTGCG TTTT CAGAAA AGCCTTC TTTT CAAA AGAAGGCT TTTT CTATT TTTA GGAACGC CAAAA  
CAGCTTCTATAGGCGGTTACCTAATGAGCAGAATAGATTCCC TTTT AAAGAAA GCCCTATTTT CTAGGAT  
TACTTT TTTT TAC TTTT CCTATTT TTTT CGCAGCATGAATGAATTCATGCTCCGAGAT TTTT CATCATAACA  
TGGTTGAT TTTT TCCCCTGCTTGC TTTT TTGAGGAAGATAAGTCCCTCTATAGGTAGAGACGAGAAA TCTT  
TTACTGGAGAACAGTCTCTGTATTGATCTCTAGCATTTGCGAGGGATA TTTT TTCTGTGACTTGG TAAAG  
TAGTTGAATATACCCCGAACAATCTACACCATTACGAGGAAGCTG TTTT ATGAATGCACCGGCCACCCAA  
ACGTACGGAGTATCTATCAATTGTTCTGC GAAA GAAA C TAAA TCTCTTAGAGAGAATGAAGAATTTAAAA  
AACGAATCTCTTTT GTAGAGCAGAAA GCTTTT CATAGTTACTTCTGGAATTGGAA TTTA ATAATGCTAT  
GCTAGCAGGAGATAGGGACACTTGAT TTTT GGTATCTATGTGGAGCGGAGCGG CAAA AGGTAAGGGGATA  
TGCCAAGGATC TAAA AAAGCTTCTTGAGAGCAGACAACAGCATTAGGAGGCTGCAGTTGGGAAGAGAATA  
GAGGAATATTCTGTAGAGAGTCGCCAGGGTATGGCTTCCATATAGAA GAAA AGACTAGTTGAGAATAGGC  
ATAGTGTGATGGTTATGGTTGCATATCC TTTT TC CAAA CAGTACTTGCCTCTCTATACCTTCAGCATTC  
GAT TAAA AGATCG CAAA CAGGAGATAATAAGACTTGGTGCGGCATGGGAGAACCCTCGGTAGAGACATCA  
AA GAGGAC TAAA AAGAGGTTCTTAGTCCTTGTGAAACGCGACTATAC CAAAGAAA TTCT TTTT CGTATTC  
TAGTCTTCATCATCGAATCGCAGTTGCAACAGTCTC TTTT TTGATAGACAAGAGAAGCAGAAA GCCTAT  
CTAGGATACTCTGGAATACTTGTGAGTGGGAGCATTAGCATCAATAGTGATGAGCT TTTT GCTTCTCTGT  
ATAATAATCCAGAACAGGTTGAG TTTT CTGTTTGTACG TTTT GAATCTATCTAGGATCACTTCTAGAGTG  
TCATCTGATCGGCGAATAAGTTCTACAGAGCATTTA GGGCAGGAA GAAA ATCCTTGTGTTTTCATTGTAGA  
TGCCCTGACAAGCTGGA CAAA TATACCGAGAAGTCAACCGATTAAGAACTTCTTCATCAGAAA TGTCTAA  
CAGAATAAC TTTT TAATTGGGGAAGTAGGAACTAA GAAACTCATG TAAA AGCTTCGCTTGGGTGACAGTT  
CTTGGGAAGCCATC TAAA ATAGCACTGTTCTCAGAACGAGATAG GAAAGAAA GTCGTCGTAATAACGTAT  
CCTGTTGGAATTCATCTAGTT TTTT GTGCTACTA ACTTC CAAA CCAATGTATCTGGAAGCAACTTCCCCTG  
GTCTAGATAAGACTTAA TTTT TTGGCTGAGCGGGGTATC TTTT GAAA CCGCACCTTAAGCAAGTCTCCA  
GAACTAATATGCAGGAGGGATAATTGAGATGCTAGTAAC TTTT GACTGGGTGCC TTTT CCGGATCCTGGGG  
CGCCATAATAATAA GAAA AAGAGGGGATCGATCCATATCATCTAA TAAA CTATCTTGTAAAGCCGACAA  
TACT TTTT GAGGCCATATAAAA ATGTACACGAGTT TTTA TTTTT TTTT CAAA CAGAAGTCGTATAAAA ATTT  
TTTT GATAAAA AGAT TTTA ATTAG GAAA GGCTTTT TTTA TAAGAACC TTTT CCGTCAATATAGTTACATAGA  
TTTCTTGTGATACTAATGACAGGATAGGGGATAGTGGAACTA TTTT GCTAACAG CAAA ATTACTTCTTC  
GCGGGTGCAGGATACACCCTATTGATTACAGCTA TTTT TTTGTTGTGTTGGTTTGTACTGGGCTGGGGTAT  
AGGAACGTGAATTCCTCGGTACTTCCCTTGTGCTATATC TAAA TTTT TAGGGAAATTTTATGTAGTGGCG  
GTTTCGAGGAACACCGCTGTTTCAAT TTTT GATTGTATATTTT GGATTGCCTTC TTTT GAT CAAA GTTA  
A TTTA TCCCCACTGGTGGCCGGACTGATCGCCCTAACCTTGAATTCGCTGCTTACTTAGCT GAAA ATGT  
GCGTGCAGGGATCAATGCGCTACCTGTTCAACAATGGGAGGCAG CAAA AGTGTGGGGTATACAGGACCA  
CAGATCTTCTTGCATATACTGTATCC TCAAGTT TTTA AAAAATATFTCTCCTTCTCTAACGAATGAGTTT  
TTTCTTTAAT CAAA GAGAGCAGCATTTCTTATGGTAGTAGGAGTTCTGAATTA CAAA AGTCAC TAAA GA  
CATTGTAGCTCGGGAAC TCAACCTATGGAGATGTA TTTA ATCTGTGCAGGGC TTTATTTGATAATGACC  
TCTGCTT TTTT CTAT TTTT GCTAGATTATCAGAGAAGGAGTCTGCATGACTGTTGAAGT TAAA GAT TTTGAC

TGTAGCTGTGAAGGGTAAAGAGATCCTTTCCAACGTCTCTTTTCTCTAGTCCCCGGGCGAATCACTTTG  
TTCATCGGGAGAAGTGGGTCTGGGAAAACAACAATTTTACGTTCTTTGGTAGGCTTAACCTCTATTTC  
GCGGTAGTATTTCTGTTCGTAGGAGATCCTCCAGGTTTGTTTTCAACAACCAGAGCTGTTCTCACAT  
GACAGTACTGGATAATTGTGCGCATCCTCAGATGATAGTCAAAAACGTGGGGAGAGAGAAGCTAAGGAT  
AAGGCCTTAGATCTTCTTGGTATGCTGGAGCTCAGAGAATATGCATCCAGCTATCCTCATCAGTTATCTG  
GAGGGCAGAGACAGCGAGTAGCAATTGCTCGTGCTCTTGTCTTGATATGAGAGCGATTCTCTTTGATGA  
GCCGACTTCTGC TTGGATCCTTTTCAGCCTCAAAGTTTCTTCAAATCGTTCTGTCTCTAAAAAGAGCAG  
GGCATGACTATTGCGATCTCTACACATGATATGCTATTCATTAATCAATGTTTGATAGAGTGTATCTTG  
TAGATAAGGGGCAAAATTATAGATGCTTACGATAGTCTGCACGACGATCCTCAAGCAAAATAGTTTGTGAA  
GCAGTATCTTTCTCTGCAAGAAGGGCCACAGGATCCGATGAATAAGATTATTCTGTTTCAGAAACTTCC  
CACGGAAGAGGAGAGACTGTTGTGTAGGAGTAGGCTCTCCTAATGATGAGAATAATTTATCGGCTAACG  
AGTTTAAAGGACCCGCTATTGTATAGCTTTTAAAGTAGAGCGATTTCGCGCATATGCAGAAGACCAGTCAAT  
TTC TGGAGACGAAA TAGGTCCTCTAATCTTGATTAGGAAGAAGTTT TTTGTCTTTAGCATAGTATTACGG  
AAAAGCTTTTAAATCAGTTCCGGATCAATCCC CAAAGTCATCGCTAATCTCTCGCGAACAATATCTGTT  
TTCCCCATAAAGCTAGTCGTATGCGCCATCAATAAGAGCATCGAAGCGTTTACAAAATGATTTGCCCTT  
TTGTACAGAGAAAAAGATTGGGGTGAACCAAGACTCAACACGTTGCTGTTTTCAGCTTCTACATC CAAAAAT  
TGAAAAGATCTTGCATAGTTTCTGTATTCGCTA TTTTCGATCTTAC CAAAATC TAAA GAAGCGGATTGAA  
TACGAAAATTTTCAAAGGAGTACGGCTTGATAGGAAGATAAAAAATTTTGCTTGTTCACTCGTAAACTTAC  
CGGGTGTTTGAATAAGCTCCACCTTCAGCAATCAAAGGATTGAATTTCTCTAAGAAAAGGCTTTATTTGATT  
TCCTCATTGATATGTAGAGATGCTGTAAGGTCGCTTCTAAGAGAATAGCTTGTCTGTAAGGACTAGAG  
GGAAA TAGGCTGTTAGATTTTCGGAATCTACTTTAATCGTTACAGGACCTTCTCCTCTAGAGAAA TCGTT  
GTGAATGGAGACATGAATTTTGTCCGGCTAAAGAGGTTAGTTTAGAGCGAACTCCAGGAGAGATAGGA  
AAGATTCTGTAA TAAAAGAGGTAGGAATATTTACCCAAGTTGCTGTTTGAGAGCAGGCTCTAGTCTCAT  
CGGAAA AAATATTTCTAGCTTCTCCTTCAATAATAAAAAGATACAGGAGTCTTATTATCCTGGTTAGGAGC  
GAGGCAATTTTCATTGAGTTGATATTGAATGAGATCGTTTACAT TTTGTGCGTAAA CCGATCCACCTATA  
TTATTTACGATAAAAATTTTCTTTAGATAGATGGTCA TAAAAAACTAATGGGGTGAAGATAGCTTCCCTT  
CTATGCCGCTTGGAGATAATAGAGAGAGACAGGAATAGCCTGTTTT TTTATCTAAGCAAGAAAATTTTAGA  
CAGATCAAGACGAAA TGTCTGAGGCCGATG CAAAATACATGAAGGTGGGCAAGAGGCTTTTCAAAGAAG  
GAGCTATAGCGTTCTGGG GAAATTTCCATTGTAATGATCCATGAGT TTTCTCAGTCAGAGACAACCTTT  
TATT CATAACAAAACGGAAGTCTCCGTAAGAGCATCCGTTT TAAA TCTAGAGGAGATATCTACAGTTTC  
CTCTTTTATCCGGAGAG TAAAGAAGTT GAAAGGAAGCTTCACTCGTTTC TCCAATATAACGGGATAGAGAA  
AGGCTTTTGTGTTGTAATCGAATGAGCCTATCCACC GGAAGTTGTAGAAGTTCCCGGATGCTTGCACAG  
AGATATTATCTGCAGTCCAAGGAGCACTGGGATC TAAAAGACGAGATCACGATATCTGGAATGAGAATTTT  
TGTTCTTCTAAGTGAGGAGATTCTGGATCCGTTA TAAATAATTTTACGTTTC TTTGAGCAACGCC TTT  
CCCCATCAGAATGAAGT GAAAAGCTAGAGCGCGTCA TTTGCAGTGGAGCAAATTTAGGGGAATA TAAAT  
CTAAA GGAAGAGAGGAGAGTGTCCATACACTAAAAGAGAGGAATTGGAAGGCTTCATCTCTTCACTAGC  
TCTAC CAAATTTTC CATGGATAAAAATTTTCATTATCTCCAGCAATGAGTTTGCCTGATAGT TTTGGGAAA  
AAGACGTGTTTTTGGGAAAATGCATCTTCCAGAGAAGATAGCTTGTATTTGTAAA AAGTGTGGAGCTA  
AACGTTCTTTCCAACGCTCGGATAATGTATAGGCGCCCTCTCCAC TAAATTTGTAGGGCATA TAAAGGTCC  
AGATAGGTTGCAGGAGAGTCTTAATAGAGGGTTATCTAG TAAAGCCTCGCAAGAGAGCTGTGTATTCGA  
TATTTTC TTTGATATCTAGAGTATAATAGGGGACTTCAAGTGGAGTGTGATTTCAATAGGTTTAGGAA  
GAAGAGCTCG CAAA TATGTGTGAGGCAAGAGCGAGTGTGGATAT GAAATTTCTGCAACATGTTTATGATT  
GTCCATAGAGAGTGTGCTATGGATATAGGAAGGAGAAGCTCCTCCTAGAATGGCAGAGGAAGAAGAACGC  
ATGACCGTAAGATGATCGGATTTGCGTATG GAAATTTTGTATTTCTGTACGAATA GAAAAGGTTCGGAT  
CGAGGGTATCTACA GAAATTTGAGGCAGGTTAGCTTGTAAAT GAAAAGTCTGATGCGCTCCATTTTCGAGAT  
GGAGAGAGGAAGTTTGTCTCCGATA TAAAAAGATAGGCTTCTTGAGATCGGATGGGCGTATCTAGAGGA  
GAGAGTTCAGAGAGAATTCGAGAAGTTATTGTAGGCTGTAAGAGCACAGAAGAGGCTCCGCTTGTGTGA  
TCAGGAATACGCGATCGCGTACGTAACCACGAAGT TTTGCCGATA TTTGATTTCTTCTGCAGTCAGAGT  
AATGAGAGTAGAGTCTTTTTC TTTGATGAGCTTTTTCGGTTAGATTTGATGAGATTTTC TGTGATAGGATT  
CGGTCTAAGGAAGGAGAGGCTA TAAAAGAGTTTGAAAAGAGAAGCAGGAACAGAG GAAAAGCTCAACATTA  
GAA CAAAATTTGGGG GAAAAGAGCTCCTTCTACAGCGACAGATCCTGGCACATCATTTTCTTTTGTAAAGAGC  
TCGTATAAGTAGTTGTTTACGCGTTTTTT TTTTCA TAAAACCCG GAAA CCGAAAAGGTTAGAGCCGTTAATC  
GT TTTTCATGTTTATGGATCCAAGTTCGAAGTGATATCGCTGCGCTCTATTTTAGAAA GAAGGACTCCAG

GATCTAAGTGA TAAA GGGACGGGAATTCATGGAGAGAGACTCATCGA TTTGTAAA GACCAGCCTGTAA  
GGTCAAGGC TTTAG GAAA TCTGTAGAGCAGTAAGCGAGGAAGAGATCCT TTTA CAATGATCT TTTCCGCA  
G CAAA TA TTTTCAGATTCGGAGTCGATTCCTCGGATGCGAATTTT TTTAGCCG TTTG AGAACCGAACCAAG  
ATAGGTGTAGCTGTTCAA TTTTCGCATTGCAGTCCCG TTTCCCTTA TTTAATACA GAAAGAAA CAGATAT TT  
TCCGATTCACTG GAAA GGAATTTA GGAAGCAGCGCCA TAAA GCTAGAGGCACTCCCACGAGAAGATAG  
TAGC CAAA TAT TTTA TACCATGGAGAACGCTTCATGAATTCACTTT TTTAGCAA TTTCT GAAA GG GAAA G  
GTTATGCGAGTTCTT TTTGATTTT CAGTAAGTATATGAGTCAGCGCATCCTGTATAGGAATAAGAGAGGGG  
GAGCAGAT TTTAGAAA AAGCAGGGGACTTAGTAAGCTGATCGAAGATGGTGTGATATGAAGGTTGCGAA  
TGTTATGAGAAGGCTTATAGCCCTC TTTGTAT TTTA AGAATCATACCCTCTC TTTCTAAA ATATC TAAA CA  
TTGAGAGG TTTCTCCAATAGAAGC TTTGGCTTTG TTAGCAAGATAG TTTGCACTGGGAGGAGGGAGAGCA  
TTAT CAAA GTGTTCTGTGATTAGG GAAA GAACATACACACAT AAAA ATGAACTT GAAA TAGCTACTTGGGA  
AAATTTCTTCTTTA GGGAT TAAA ATGC TAAA ACC TTTGT TTTG GAATAAGAAGGTTAAGGCTCCTC CAAA  
CAAAA TAGATAATAGCATAGAGG TAAA GAAGGAGAA GAAA AGAGGG TAAA GCAACTAGAGCTCCGTAAGTG  
AAGCTATAAT TAAA AAGGTGGAGCTGGAGG CAAA AGAAGATTT TTTGAGAAA GGATCCATGCACTACCAG  
CTATAGTTGCTG CAAA AAAAGCTGCAGAT TTTCTTTGGTGGGGACTCTAGAGAGGAATGCATAGCAA CAAA  
GAGAATCCCGTACAGAAGAGCATAGGGAAGTAATCGT GAAA CAATA TAAATAAAA AGCCATGGAATGGCTG  
AAAC TAAA TAGTTGGGGGTAGTTGATAGGTAGAATCTGTGTAATATAGATCCAAGATCCG CAAA CAATAA  
TAAA GATCATGGGGCTAACAAAGAGTGATAACTAGATAGCTAATTAGTCTC TTTAAA GAAGCTTGAGTGAT  
TCCTGAACAGAAGAT TTTATTTA GCCCATCTTC TAAA GATTGTAGCATCAGAATACCTGCCCAGCAGAAG  
ACAAA GAAA CTACTGACAAGAACCCTCCGATATTGCTAGTTGTTGAGTAAGCTGCTTCAATAAATTGCCA  
AGATCGGCGCT TTTG TAATCGG GAAA GTGGAGGAGTAACCCTC TTTTC CAGTC TAAA CTAATGAATAGGTA  
TTGA GAAA GCCTGAGGAAGAAGACCAATATAGGAACACA ACTGAATAGTCCATAATAGCTTAGAACGCAG  
GCTTC TTTAGAAGCCCCGTTGTGA TAAA GAAC TTTAGGAGCT TTTAGGATAGAT TTTGATGAT GAAA TTGT  
TGCGAACAGAAGAGAGAAGCTTT TTTA GAAA AGACGGAGGGCGCAACATAATGAAGCTATAATAAAA AAC  
AGATCT TAAAAAGAT TTTAAAC TAAA AAGAAGATTT TTTAATTATAGTT TTTCAA ATCAT TTTGATATT  
TTTAATGCTGAGAT TAAA CAAGAAA AGCG GAAA CTCTTGCAG CAAA GAT TTTCTGCTCGAGCCCTCTTCC  
CTGAGGATTT TTTA GGGGAGATCCATTCTTCCATACTATCAATCAGAAGATTGTGATTAGAT TAAA GCTTG  
TACCCAATAGCTTAAGG GAAA ATG GAAA GAATATGTCGTCTCAGAATGTT TTTCTCCAGGATGCACAACG  
ATAGGGACCGCCACAGGAGAGAGATAGCGGTCTATT TTTCTAGATAAGAGTTT TTTAGGCTCATCA TAAA  
GCCATGAAGAAA GCCTAGGGATGC GAAA GCATGGATGGTTGAGAACAA TAAA CAACCTACCTTGAGGAGC  
CAAAA AGATTCGCTGTGTGTGCGATAGCTTGTCTGGAGATTCCATATTCTGAAGA GAAA GGATGCTGTA  
GCATGG GAAA ACTGCTCATGATGATCTGCTGGTACCGGTTGCGTCATATCGTGATGAAGAAA GCGACGTG  
AT TTTGAGGAAGCGCT TTTCTTTG CAAA ACGCAGCAGACTAGGG GAAA GATCGATTCCCTAGATAAGGGAG  
ATAT TTTAGG TAAA TGCTTCTC CAAA ATCCCTTGACCACATCCTACATCAACCAGAGACGATGAGCGG GAA  
ATATGTAGCTTAGAAA GGAGATTAGGGAGAATCACTTCCTTATGATA GAAA TGTCCATCGCGATCAACGG  
CTTTA TTATAATCTTGGGCAATGACTTCCCAGGAAGTGTCTGAGGACCG TTTG GTGTTCCGGGATGAGTT  
AGAAGCCGGT TTTCTGGACATAATTAAGAGGTTCT TAAAT TTTCTATCC TAAA CACCATAAGTCG TTTCTG  
GATCG TTTCTGTCAAGGAAGAATCCATG TAAAGTTCTTAA CAAA AATC TTTGG CAAA ACTCGGATATTCTC  
TGAGTAAGAATTCAAGAAGTAGTTGTTAT TTTGAAGGGTGGACAGTCTTCGACTTAGGAGAT TTTCTCTA  
ATTAGAGTACAATGCTTCTGAATCGCAGCT TTTA TCAGGATTTTT TTTAAGTTCTTAG TTTCTTCGCAAG  
TT TTTA TATTCTAAGAGCT CAAA AAGTGGA ACTGGGCTGCATAAGCAAGATCTATCTTATTGGT TTTCTAT  
TCCAAT TAAAGAGGATATGCTGGCTGCC TTTA GAGACCTATGATACGTGGATAGCGA TTTCTAATTAGG  
GGAGACCGAAGCTTCGATAGAAA GTAAG GAAA TCC TGGCGGGGAGGAGAGCAGTTATGGCTTGTGCGC  
ATGTGTATACGGTTACGATGAGA TTTG TTGTAGAGAGGAGACTGCA GAAA AAGTAGTGCGGTCGAGTA  
GACTGCGTGCTT TTTCTATATAGCAGCAGCGATCACCACAGCGGCTCCGCAGTATGGCTTCTTATTAGGT  
TGATGCGTGTGCAATTCATAACTACTGTTCTCCTGCTAGTGAGAGAG TAAA ACTTCTTCCCTATCACAGA  
AAGCCGTGCTGAATGGTCTCATTAATCCCAGT TTTA GGGCCAATGGTAGTTGCAGCTGTTG TTTACTTT  
AAA GCTAGAGAGGAAGGTTATGGACA TTTG GATTCTCTAGTGTGCGCTATGCAGTCTCCATGGATGCTAT  
TAGATTCCTTCG TTTGAATCGATCTGAGC TAAA GATCGTGATGGTCTAA TAAA ACAGTC TAAA AAAGAT  
TTGGGGAAAC GAAA TAAA AGAGG TAAA GCT TTTAAA GATGGTAAGCTTCGA TTTAAA TGATCCAGTAAGA  
AA TACAGACAATCATTACAGAAA TATCAATCGCATGCTCAATAGTGCAGCTTGTGCTGCTGGCGGCATAG  
GATTGTTAACACCAGTGGTATGCTCTCCAATGGGAGC TTTCTGT TTTGCTCAAGGGCCTTCTAGTGCCGA  
AGACTTAGGGCATCGTATTCAACAT TTTGTTGCGTG TTTGGGACCAGCTGCAGGATTTCTATTCTCTAAGT



AACGAACGGATCATGTTTGAAGAGGCTGCAGTTCCTAGTGTTCTCGAAGCCGTAGAAGCAACTTTTGGATATCTGCCTTCGCCGTTTGAGAGGGAAATAAACCCTTCAACTTGCGATACTGTGATGATGAGTTGCTTAATTGGATGCAATTTCTTTGGTATGCGGGGCTATGTTGTTGCCATTGTCTCCTGTGCTGTGAAAATTAGTCGCATTGTGAGAACTATGACGCAGGCACATGCGCTCCGTGAAACAATTCAAAGACAGTTAGCAGCACGAGCTACAGATATGCGTTCTGCTTACTCCAAGCTCAAAGGCATTATAGCCATAAGAGCTCTTAATGAAGTAGAGAGGGCCATCGAAAATTAAGAAACAAAATGATCACAGCTTTGTTGCAAAATGCACTCATTACACTGGCCTTCGTGCTTTATTAGCTTCTGCGGTAATCGCAGCATTTTCTTAGGTGCAGCAAGTGTGCTGGACTAGCAAGCGTTTCTTTGGGTGCTTATGGGGAGGCATAGGAGCCTTAGCTGTGCGAGTTTGGTGGCATCGTTTCGGAATCTGCCAGCGCAACTATAAAGTAGAAGCTGCGCGGTGATTTCAGCGAGGTGCTCTTTATGCGCTTGTTCTTGAGAAAATGCAGCGATTCCCATAAAGAATTTCTAAGATGGTGTAGCGAAAAGTGTGGTTGCGATTCAAGCTGGGAATCTTTGGATACAGGAGAGTTGGCTTGGGAAGAGATGCCGAGCATCACAGCTTGTAGGAAGAGAGGGAATAGATGCTCAGGCGTATTCTTTCTTTCTGTAAGTCTTTAGATGCGCGTATAGAGTAAACGGTTTCGAAAAGAAAGATTTCTGCTCATAGCGGCGGATTTGTGGTATAGTGTCTCCATAAAGCTTTAGATCAGCTTTAGGGAGATATATGAGCTATTCTTTTTCGCTGAAAAGCTTGTGTTGGATAGAAATTTATAGAGTGTCTGGAGATCCTGAAGCTCCTGTGATCATTTTGTGTCACGGGTATGGCGCAAGTGCCGATCATCTTACTTTTTCCTCAACCATGTGCGTGTGCGCCAAATTTGCGTCCACATGGGTCTTCCCTCATGGTATAGAACAGCTTCCCTACCAGTTGGGAGGGGACGAGCTTGGTTTCATTGGATACCGTTCTTTTGAATAATTGATTCTTTCTCAGGAAATCACCTCAGATACGGATCGTTTATATCAGCAGCTATTGGATGTAGACTTTTGAAAAGCCTAAAAGGGCTTTAGAGGGTCTTATTACAGAGTTGAAAAGAGATCGATCGGAAGTATTATTGGAGGTTTAGTCAGGGAGCTATGATGACGACGCATCTGATGCTTTCTTCTCGGCTTCTTATCGAGGTGCTTTGATTGTCTCTGGAGCAGCCGTTCCGAATCAATCTTGGGAAGAAAATGCGTCTTTATGTGGGAAAACCTTTATATACAAAATCATGGGTACGATGATCCTATTTTGCCCTATTTCTTAGGGAGCGGTTATATAAGGTTTAAACAGCTTCTTTAAAAGCGAGATGGTTTCTTTTCATGGAGGACATGAAATTCCTGTTGTTATGATGCAAAAGATACAGGAAAGCATCGCGCTATGGAGTCAGTCGACATAAGGCGGACAGGAGTTTAGGTTGTTTTCGCAACAGATTGAGGAGAGCATTAAAGGCGGGCAAGTTTTTGCTTCCCTACAGATACAGTATATGGTTTGGAGTTCTTTTCATATCCTTGATGCTGATCAGCGATTAATTTGCTCTTAAGCACAGATCTTCCAAAAGCTCTGTCCGTCTATGTCTCATCTTTAGAAGAATTAGAGGCTGTTGCCAACAGTCTTTAGGAGCATCTTCGAGAAAGATAAATCAAAGTTTCTTCTGCGCCTTACCTTGATTACAAAACATAATAATCCGAGATTTCTCTCAAAAACATTGGGATTCAGGATTGTTAATCATCTATAGTGCAGCAGATCATTCAAAGTAGGGCCGTTCTTGCTACTTCAGCGAATCTATCCGGCTTTCTTCTGCGAGTTCTGCTGATGAGGTAACAAGATTTCCCGGAAGAAGATATCGTAATGATTTTCAGGAGAATGTTCTATAGGGTTGGAGTCTACAGTAATCGATCCTGAGGAGCAATTGTTATCGTGAGGGTGCTATTTCTATTGCAGAAAATAGAACTGTATTGGGGGCTCCATGTGCTAATCTGTCTAAGGAAGTAGGGTTAGAGAAAAGATAGGTATCCATGTTGTAATAACTCCCGCAGATTTATGTAGTTTCTTTGCTTAGACCTCATTTAAGGGTGTATTTGCCATCAGCCTCATCCTCATACTTTTATTTCTGTTCTAAGGCAGGCTTTACGCTCTCCTACACAAGAAATCATTTTCGTTTACGATTTGTGCAATACAGAAATCCAATCTTTTCACGTTTTCAGGAGTGAGTTATGATAGTGGATATGCATTGTGATATGCTATCTCAATAAAAACCTTTCTCTTCAGACCCAGCGGTACGAAGCTCCTGATCAATTAATAGAGGGTGGAGTGGGATTCAGGCTGCGCCTTATTCACAGAATCACAGAATGCACCACATTAGATGAAACAAAACCAATGTTCTTTTCTTTAATAGAGCAAGATGAGCGACTGACTCCACTATCTTACGAACCACAAGTAGAAAGCTCTTTGCAGGTAGTTGCTAGTATTGAAAATGCTTCAGGTTCTGGCTCTGATGCTCAGCCTTTACAAGAACTATTTGCAAGCTTTTGTGTTACATGAACAGGGCCCTTAGCCTATATAGGGCTTGTTTGAATTTTGCAAAATCGTTTTGGTGGTGGGATTTTAGAGCCATAACGTTTGTCCAGAGATGGGAAAATCTTTTGAATTTGTCATGCTCTAGCTATTCAGTGGATCTTAGTCACTGCTCAGATCCTTTAGCGGATGATATTTTAGATTTTACTGCGGATAAAAATGCCGACATGTTCGATTGGCTAGTCACTCCAATTTTCGCGCGGTTCAGGATATCGAGCGGAACTTATTAGATGTGCATGCTAAAAGAGATTTTGCAGGGATGGGGTGTATTGGGCTGAATGGAGTGAAGTAACTATTTGTAGGAGCATCTTTGGAGGATATAAAGCATATCGTTCATGCCCAAGAGTTAGGGATTTAGATAGTTTAGTATTAGGAACAGACTTTTTTTATACTGAGGAAAGAAAGTTTTCCTCAATTTTCACAGCAAAAGATCACCCATAACTACACGCTTTGATTAAGGAGGCTATTCCTATAGACAAGGCGCAATCTCTGCTAGAGGAAAGAGCTCAGCGATTTTGAAATCGGGTAGTTTCGGCAAAAAGAAAGTTGTCAATCACATTCGTTCTAGTGAAAAGTGTGCATAGGTCAAATCAACACTACCTGAAGGATAGTGAACAAATTTGATCTAGCGGTCTGCTCAAAATATAATCATATTTCTATGTGGTACAAGGGCAGACAAGTGAATTTGTCTAGAGCCGTTTGAATCGAACTTAGATTTTAGCAAGGGGATGGAAAGCTATAGAAGTTGCTGTGGAGACAGAGAAATCTTGAGTGGCTCGTTTTGAACAAATACATGGTATTCGAGTCTTCAAGAGTCAGCTGGATACCTGCGTCTCGGCATTG

TTCTTGCAATACCTCGGC CAAA CGCTGACAGCGCGTAATATTATTGGGATATAT CAAAGTAAT TTTCCCA  
G GAAA AGGAGTAGAAGCTTCTTGATGAGCTATGATTCCTCTGGAGATGGAGAGC TTTCCAGCTACTCGAT  
ATTGTGTTCC TAAA GCTTGCTTACCAGTT TTTCT TTTGGATGGCAGCAATCAATCGCTGACGATTAGA  
TAGAGAG GAAA GTACAGGATC TTTGGGATTAAGAATAAGCCAGAATGTGCCATCTACAGGGTAATGGGTG  
TAGAGAGCAGAGGTAGTCCGAAGCT CAAA AGGAATCCCTTGGTGCCAAGGCTGCCCCACCCAATCCACGT  
CACCTCTTCTTAAGAGGTGTAGAGCTGTG TAAA GTTTGGGAATGATGC GAAA AGTCTATGGAATGTAATTC  
CACATGCGCATGGTCATAGTAATAAGGGTTTT TTTGTAGAACGAGCG TTTGCCCTTGCACATAGGTT TTT  
GGCA TAAA AGGTCCAGAA GAAAGAAA AGGAT TTTCTGGACGATACACAG CAAA AAACGGAGAGGCTAATA  
TCGCCAATAGTTGAGGCTCGGGTTC TTTGAGTTCAATAAGGA TTTCTGAAGAAGAAGAGGCTC GAAA AGA  
TAGCT TTTTCAA AAGTAGGGAATATCGCCAGCTTG TTTAGTGTGTTCCCAAGCAGCTATTACATCTTCT  
GCAAG TAAA AGAGAGCCGTCCTACTCCACTTAGCATC TTTACGAATA CAAA AACGA TAAA ACCGCCCGTCTT  
CC GAAA TTTGATAGGAGGAGACCAGAGCAGGGGTTAATCCAGAGAGCTCTTCTCTGAAGAGAGTAG CAAA  
TAAA GCCTTGGA CAAAGAAA AAT GAAA AGCAT TTTCTCCTT TTTCTGGAGAAA GAGAGCGAGGATCATCG  
TGAATGGCTATGATTAAGCCCGATTCTGGAGGA GAAA AGGAGCATCCGACCGTTAGGAAGGCGATAATAC  
TAAA AAAGATAGAGCGAACATACA TAAA ATATT TTTGAGTA TTTCTGTAGAATCAGAAGTT TTTGTTTGT  
TGCCGTTCCATTCTA GAAATGTATAATACTTCTTAGAGAGCGGAAGTATAATAAC TTTCCGGAGAAAA  
TACACAGTATT TTTCTGCTGAAA AGAATGCT TTTCTCGTAT TTTCAAAGTGAGT TTTCA TTTATGT TAAACG  
AGACATTA TTTGTATTG CAAATCCCTGTAGTTATTGGGTTCCGGAGCTTTTTTTTCTGCGCGTAATCTAAT  
TATGTTAGCGGCATGGGCCTCATTGC TTTCCATTATCATGAACATT TTTGTAT TAAAG CAAA TCGTGTTA  
TTCGGATTCCAAGTAACTGCAGCGGATG TTTACGTGATAGGGCTGT TTTCTTGCTTGAATTGTGCGAGAG  
AATTCTGGGGGAAGGAGTCTA CAAA AAAAGTGATT TTTGTTTT TTTGTTGCAGCAGC TTTCT TTTCTAAT  
CCTGACACAACCTCCATCTCCATCTTAAGCCTTCTCCAGGAGATATCAGCCAACCTGCACTATGAAGCTCTA  
TTCGCCCTTCTCTTCGGATTAT TTTCCAGCATCAGTGATCACAACGATGATTGTGCAG TTTGTTGAT TTTA  
AGGTA TTTGGTTGGCT GAAAAAACATTCGCGAGGACGGGCT TTTGGATTGCGTTCCGCATGCTCCGTTGC  
GCT TTTCTCAAAGCATAGACACCGTAATTT TTTCT TTTCTAGGTTTG TATGGACTCGTTGCTAACTTACCA  
GATGTCATGATGT TTTCTTTGTTGTC CAAAGGGACGGCTCT TTTGTTAGCTTCTCCTTGTGTGGCTCTAG  
CCAAGTTTT TTTATAATCGCTTGAA TAAAGAAGAAGCACACT TTTAATCGATT TTTAGGT TTTCA CAAAGA  
AAGCT TTTATTTAAT TTTACGAATTAACACGAACCTGCTAGTATCCCCTTGTCTCGCTCCTCTGTCTACT  
AGGAAA CGGTGAGTTCCTTG TAAA AACTGGGGTTG CAAAGAAGGTTCT TTTGTAATTAAT TTTACGAATGA  
GAAGAGACAGGAAA GAATTGATGTT GAAA AAGCCTAATAGAAA CGATCCTTGTCTTGTGGGTCTGGGAA  
GAAGTATAAGCAGTGTG TTTGAAA TCACAAGCTCTAAGTCTGCTCGCCATACTCCTGAAGG GAAA TTTAAG  
TTTTCTATAACAGCTTCGCCTGCCGAGGCGCTTCCACGGAAGG TTTCA CAAA ACTG TTTCCCAATCAG  
TGGATTCTTATACCTCAGAACAAA AAGAGGGGATGAGTCGG TTTCTTATTACT TAAA AATAAGGAACCTAT  
AGG GAAA CGCGGATTCGCAAGGCTAAGG CAAA AGAAGAGCGCATCA TTTCCAGAGAAA CTAAGCCAGCAC  
GAAT TTTCAAGTGATGGATACAGAAGTATCGGGAGAAGATATACAGTCTTCACTAGATTATGAACAG TTTCT  
TTCTACAGAAGAAGACTACCGTGTGCAGAAA GAGGAAGATTATAAGAATCT GAAA ATCTTAACTTTT  
TTGTTGCGGC TAAA GT TTTCTTT TTTGTCATAATGCTGGTCTTATGCTGGAGTAGCTCAATTGGCAGAGC  
ATTCGAT TTTGTAATCGAACGGTTGAGGGTTCAATTCC TTTCTCCAGCATCTTT TTTGGGGGGTGTGCGCA  
TAGCGGTC AATTGCATCGGACTGTAAA TCCGACTCCTTACGGATACGTTGGTT CAAA TCCAGCCACCCCC  
AGGACCTCATAAAA ATCCTATCAGAAA TCGGTTG TTTGCGAAGCTTGGGTTCTCCAGGCTTTT TTTATG  
CTCT TTTTCATCCAAGT TTTATTTAAA AAAGAATTAGT TTTGACTTCTAATTAATAG TTTGCTTTTATT  
CAAAA TAAA AACTTG GAAACAAT TAAATGAGTGATTCTGACAAA ATTATTAATGATTGTGCGGTTGACTT  
TAATACAACCTGTTCAATGGAGATCT TTTAGCTT CAAA TCTGACTACGGAAGGGGACGTTACGG TAAA GAGT  
ATTTCCG CAAA AGAATCCT TTTCTGT GAAAAGAAA GGTTGATGTGAATGAGAACGACATCATTGTTAACG  
GTT TTTA CCGGTGCCGAGGATATGATCTGACAACCTCGAGG CAAA TTTCAATCAATCTCAACGGTAATCG  
ACTTAGTAATGT CAAA TGCCCGGA GAAA GACTCCCAACCAGTTCTTGCTAACTATATTCGTACTCCTGAA  
TACTA TTTCTGCTCATTGCAAGATGGAGCAAGAATCGAATG GAAA CGGGGGCAGAAGCTTCTCTAATCG  
GGCTTCGCGCTTGGTGTATCAATCGTCTCGTATTAATGAGTTCATTTCGTTTTG TATCG TTTGAA GAAA  
TAAA ACTAGGACGCAGGT GAAA TAAA TCTCTCAGGGACTACAGGCCTG CAAA TGCTTGC GAAA GGTGTG  
TACATTATCAACGTAGGAGTTGGGAAGCGATGGGGGTGGAATAATGGATATGGAGGAGATTACTG TTTAG  
CGGTCCC TTTAG GAAA GGAATACAGTGAGAGCTCTACA TTTA GTAGAGGAGGATACTATGCTTCTACTGC  
TGTAGGAACAGCAATTCATATCA GAAA AGAGAGCA CAAA TCTTGACGGACCTT TTTCTTCTCAGATACA  
GAACTTATGAAGACACT TTTAGAGGTGCGTTACAAGGGCGGAGACTATGTGGACAAGTCCGCCTTGTCCA

CTTTATATTTTGAGTGCTCGTATACCCAGAGATAGGAGGATAACATGAAGAAAACAGTATTTACAGGGG  
GAGCTCCTATTCTGGGATAAGTACAGAAGAAGGAACGGGGGTAAAAGATCAAAACTTATGGATGCGCAA  
TGCCACCTAAAAGGTAGAGGGGGATGCGACTATAGATGACACATTAACCAGTCGGGATTTAAAAGTTACG  
GGCCTACAATACATACAGATCTTGATCTGTAGTAGGAGGAGATGTAAAAGGAGGTAGGACGGTTCTTG  
GTGAAACCGTTCTAGAAGGAGATTTTAATATTAAGTGTAAATCAAGGACAAGTTCCCTCAGTTCACTAA  
AAGCGATCCTCTCTCCGCGAGAGATGCGATTACTTTTGATTATTATCGGGATAGATCTACACAAGCTTAT  
AACTGCGCGACCCACCGTAATGGTGCCTAGTAAAAGGGAACAGGTTTATCGATTTACGTATGCATAATA  
TTGACGACTCGGAGTCTTACACACCTATGTATCAGAATCGGTTCTATTGAAAAGATAATGATCAAAAA  
ATTATATCTGAAAAGTCCAGGCATCTATCAAGTAGCCTTTCAAAATTTTGAAGTGGGGGATACCACTCA  
GGTAATGAGGATCCAACGATCTTCTTAAGATTATACACCTCAGCCTATGAGTACACTAATCTTTGTACTG  
GAGATACAAGAGGATTTAATCCAGAGCATAACAAGAACCTCCCTGTATTCTATCTTTCTATTCCCTTC  
TATTGGGAATGAGCATCCTTTTATACAAGTTTTCACAAAATTCATGTCAATATTGCGTACTCAATGATT  
AACGTGATTTTGGTTTCTTTTGGTTCTTCTTATAAAGGAGGCAGATTAATGACAACACCAGATAATAATAC  
TATTGATGTTTCTTTTCCGACATTTGTACGTTTGAATGTAGCGACTACGGATTTTAGCAGATGGAAA  
TAAGAGTAATGCGGTTACGATTACAGAAAAGCAACAGCCAATTACGTGAATGTAACACAGGATTTAA  
ACCAGTATACAGCCTGAGTGTACACAAGATCTTATTGCTCAAGGAAAATTGATCGTGACTAATCCGAA  
ATCGGATATCTCTTTTGGCGGTCGTGTGAAATTTGGCAGATAACACGATAACTTATAATCCGTATAATA  
ATGGGGGAGGAGAAGTTGCGTTTACCGGACATCAACTCTCGTCAAGGGAAGCAATACGTTCCCTTATGG  
GCTCTATAAGAATGGAGCGCCAAAATAAGTATGCGTTTCCAGCGCTATCCGGAGGCCACGTAGGATCT  
GGAGATACTAGAGGCTGGGAGCAGAAGTGCCTTTGGATGCCTATACTCAGCAGAGAGAGGATTTA  
GAAGATAAGGCTGTGACTTTAGGCCCTGCGAATAGAGGTAATTTGTATTTGAGGCATCTCTGCGG  
CTCCCGTTCTTCTGTTTATGAGAAAATAAGGACTGGCTAGATAATGGAGCAGGGGGACGTGTGATG  
CTCTATGTAACACATAAAGTCTGCTGGGAAGACGATGCGACGCTTATTAGGAATAGCCGTATGTTA  
AGGGTCCACATGGTATACAACAGTACCTATGTTTGGTGCAGCAACATACTATGCAACTTCTTCA  
GGATTTTCAATTTGATTTGGGAGAGCGAAACTTTCTGTGTTTCTTCTCTTGGAGTGTGGTT  
CGGCTACCTGTTGTTCTTAAACGGAGCTCTTTCTATTTACACCGCTTAGCTTGC  
TTTAGTTAAGCGGTTCCCTTTTATCAAAACAAATAAAGAGATCTTTGTTGTAGACGGATCG  
GAAAGCTACAAGTATAGTACTGGGAAGAGCAAGTCGCTTAATAGGTTCAAGTAAAGAACTTC  
GCAACAAGGTTAGAGGTCCTCGAGGAGATGGAAGAGCGAGCCGAGTTGAATATTGGGGAGACTA  
CAAAAGTAATCGCAGAACTCGGACATGGATTGTGGAGCCGAGATGTGCTTGCAGAACATCG  
ATTAAAGCGTTATATTTCTCAAGATACTGCCTTCGGAACTTTCTTTCAGAAAATTTATATGCG  
AGTTTTCAGGAAGTGAATGTTCAATTGGCTGCCATTTCGTCATGCAAGCTTGGTGGCTATCGAA  
AATGTGTCGCGAGAAGGGGATCGGTATTTTGGTTGTTACTGAAGAAATGGAGGGACTATTTCT  
CTTGCAGTAAGTTTGTCTGGAAGGAACTGTCTGAAGAAGAAGTAGTGCAATTTGATTTCAGCA  
ACTGTGCGATGCACTAGAGCTTGTGCATAGTATTGGGTTAGCCCATGGTCAGATTCA  
TTACATTCCGGTGCACGTTTCTTTCTAATGGGATAGCTAATATCTATCTTCCAGAAGTCGGC  
TTTGGCTTCTTTGCTCAGAGAACGCATGTTTCCACTATCATGCAGTCTGGATCAGCGCGAGAG  
AGTATTACACGTATTCGTGACTTGTGATGTTGAGGCTCCGAAAGAACAAGAGGTC  
TTTGGTTCGAGAGGCCGATGTTTACTCCGTTGGTGTATTAGCTTATTA  
TTATTAATGATGATGTTTCTTTGGGATCTTTCCCTAAGCCTTCGCTTTGCATGCCTGATAG  
CTGGTATGATGGGATGGGTTTATCTTAAGTTGTTACAACAACCGGAGGCTCGCCC  
TAAATGTTTACGAGAGGCTTTAAGGAGAAACGCTCAGGTTACGCTTGACAGCTGTCCG  
GAGCCTCTACGTGAAATGAAATAGAAGACACTCCTACAGAGTTGGGACCCCTTCGCTCTTAT  
TCGGAAGGAGAAAGGCTGTGTGAAGTTAAGGAAGAGCAGCATGCTTTGTATTAGTAGAGG  
CCAAGTCGATCGATGAGGCGATGGTTACCCTGTAGCAAGGGAGCCTGTAGTGAGTGC  
TATGTAGAAAGTGAAAAGAGAAGATTAAGCCGCAACCATTATTGACGAAATGATCTTCA  
TTGAGGGGAGGGGAGTTCTCTCGAGGAAGTGGGGATGGTCAACGAGATGAGTTGCCTGT  
ACAAATATTACTTTACCAGGGTTTTCTTGGACATTCATCCTGTTACCAATGAGCAGTTT  
GTCCGGTTTTAGAAATGCGTAGGAAGTGAGCAAGACGAACACTACAATGAGCTCATTCG  
TTTGAAGATTCGAGAATTCACGTCGATCAGGCCGACTGATCATTGAGCCAGGGTATGCTA  
AGCATCCTGTTGTAGGAGTAACCTTCTCAGAAGCTGAATGGGAGGTAGCAGCCTCAGGA  
GGAAAAGCTAGGGTTGCGGTACCCTACTGGGGAAAGAAAGTAGATAAAAGCAAAGCAA  
ATTTCTTTAGTTCCGATATACTACTCCAGTTATGAGCTATCCTTCTAGTATACTGGGT  
CTTTATGATATGGCTGGCAATGTGTATGATGGTGCCAAGACTGGTATAGTTATGATT  
TTATGAGAGTTCTGCTTTAGAGCCAGATGCTCCTTAGGGCCTCCTCAAGGGGTCTACCG  
TGTGTTGCGAGGAGGATGTTGAAAAGTCTAAAAGATGATCTACGTTGTG

CACATCGCCATC GAAA TAATCCTGGGGCTATTAACAGTACCTACGGG TTTC GTTGTGC GAAA GATG TAAA  
A TAAA G GACTGAGTATGGGTGCTGTATCTCGAGATGATTATATTGC TTTATGCACAGAATTAGTGAACA  
TGACCGACGCTATTATGCGCTCAATCAACCGACGA TTTC TGATTACAGCTATGATAT GAAA ATGCGAGAG  
CTTCAA GAAA TAGAAGTTCAGCATCCGGAATGGAAGG TTTC ATGGTCTCCTACCATGTAT TTG GGGGATC  
GTCTTCAGGACAG TTTC CTGTGGTTCCTCATTCTAGCCCCATGTTGTCTATAGCGAATGTATACTCATT  
GCAAGAGCTAGAGGAATTTT TTTC CCGTACAGAAA AATTATTGGGGTACTCTCCTGGATATTC TTTA GAA  
CT CAAA ATTGATGGAATTGCTGTCGCCATTCCGGTACGAGAAGCGATTG TTG CTCAAGC TTG AGTCGGG  
GGAATGGGG TAAA AGGAGAAGATATTACAGCTAATGTCAGTACTATACGCTC TTTA CCTATGAGACTCCC  
TCAAGAGGCTCCCAGGATCTAGAAGTGCAGGAGAAGTG TTTC TTTC ATATGAAGCG TTG AAGAGCTC  
AATGCTTGTCAACGGGAACAAGG GAAA CTGGAAT TTG CTAATCCTCGTAATGCAGCTGGAGGAAC TTTA  
AGCT TTTA TCTTCTAAGGAAGCTGCTAAGCG TAAA TTAGACTTGTCTG TTTA TGGGTTGATCACAGAT CA  
AAAAAACGCTCACAT TTGAAA ATCTTCAGTTATGCTCTCAATGGGGATT TTTC GTTGCAGGGATGCCG  
AAA CAATGCCGTTTCGAGACAAGAGGTGGTAGAACGTATTTCGAGAGATAGAGGAGATGCGCGCAGCGCTCC  
CGATGGCTATCGATGGAGTCGTCAT TAAAGTAGACAATATTGCACACCAGGATCGGCTAGG TTG ACAG  
CAAA CATTATCGTTGGGCGATAGCTTA TAAA ATGCTCCG GAAA GAGCAGAAA CGAT TTG GAGGATATT  
GTCGTTCAAGTAGG GAAA ACGGGTATTCTTACTCCGGTTGCCGAGTTAGCTCCTGTTTT TTTA TCTGGGA  
GCCGCGTGTCCAGAGCATCCTTATACAACCAGGATGAGATT GAAA AAAAAAGATATTCGCATCGGAGATTC  
GGTGTATGTC GAAA AAGGAGGAGAGGTTATTCC CAAA ATTGTTGGGATTAAT TTG GCTAAGCGTTCATTA  
GAGAGCGAGCCTTG GAAA ATGCCAAGCCTGTGTCTGTATGTCATGAACCTGTTGT TAAAGAGAAGGTGT  
CGGTGCGTTGTATCAATCCAC TTG TTTCAGGGGGGATGCTAGAAA AGATCTG TTTC TTG CAAGTAAGAG  
CGT TTTAAA CATAGATCA TTG GGAGAGAAGGTCGTAAC TAAA TTATTCGAAGTAGGTCTCATTAGTTCT  
TGTTCCGATATA TTG CTCTTACAGAAGAAGATT TGAACAGGTCCCTGGG TTTAAA GATCGTTCTATAC  
AGAA TTTATTGGCAAGCATTGCCGGAGC CAAA AAGGTGGCATTAGATCGGCT TTTA ACGGCTC TTTC TAT  
TCCT TTG TGGGGAGCTCTGGTGCCATAGCTCTGGCAGACCAC TTG GAACTCTGGA CAAA GTAATCGAA  
GCTTC TTTAGATGAGCTGATGTCTATAGAGGGGATTGGTCC TAAGGTAGCTGCATCGATCGTCGCTTCT  
TCTC GAAACATGAGAATAGAGAG GAAA ATTCGTCCGATGCAAGAGCTAGGAGTTCAGGTTCTTTTC TAAGCA  
ATCCGA TAAAGAGGCTCC TTTA CAAG GAAA AGTG TTG TTCTTACGGGGACTCTCCAACAGATGACGAGA  
ACGCAAGCAGAGGAGCGTATCCGCTCCCTAGGGGG GAAAGTGAGCTCTTCGGTATCGAAGAGCACATATG  
CCGTCATAGCGGGTAGCGAAGCTGGGGG TAAATT GAAAAAAGCTCAAGATTTAGG TTTAAGTAT TTG GAA  
CGAGAG CAAATTATCAAGAATTCTTGACG CAAA ATCCGCTCCT GAAA ACGAGTTTT TTTC TAAGAGACA  
GCCTAAGTTAACCGAGAT TTTA TATGTGAGAATATGGTATAATACTTCCTT CAAA AATAGTTTT TTTC AGGAA  
AGTATGGCGAATCCGCTACACCCCCATCCAATCTCCGGCC TTCTTTTCAAGGTCG TTTAAGAGCCT  
CAAGTCAGCAATGTACGCAAGGCCGACAAGGGGACCCTCAACC TTG AGTCCAGAGTCCAGAGGCTTGAC  
CT CAAA CT TTTC TACTCGCGAGAT TTTA ATTGATGTTGTAGAGGAGTCTATAGAGACCGCTAAGGGCAGC  
GAGCT TAAAAA ACTTCGAATATATGAGATTGCTC TAAA GATTCTTACAATTATTGGAGCCGCGATTCTCT  
TCGCTGTTCCCTC TTG TATGTTGCTCGGTGTACC TTTA TGATTCC TATTGTAACGTGTATCGGTGTAGG  
AATTGCT TTTA GTATCGC CAAA GGATGCTTACAGAAA AGATGTCAGCAGATTTCGAGAAGAATATCGTGCT  
CTACATCTCTATCATCGCTATCTACT TTTC CAA CAAA GATTCCATTGATGGGACTCT TTG AGTCGCTTCG  
ATATCCGT TTTC GAAA AGCGGAAGAGAAA ATTACACGGGTAGATCTTGAT TAAA AGAGAGGCTAATCATCC  
ACTAGAAGCGGACAAGAGATATGAT TTG CCGGGTTGGCTCATCAACGCTACCAGGTGGATGCAGCTCTT  
GGAATCTCTAGTAGCCAAGACGCTT TTG GAGAGGGGTTGCTCAGCAGG TAAA ATCTGTTAAGGACGATG  
TTGT TTTA GGGGATAAGGCGAGTACAGATCTGTACCCGATAGCGCAACAGGCTCTACAAGCAGCGGGGGT  
AGG TTTC TCTGGCGCTGCAGG GAAA GAGTCTTG TTGGATCTAG CAAA ATCTTTA TCCAGTCTG TTG CG  
TGGGGTTCTCAAGTCGG CAAA GACTCTCACGAAGC TTTA CAGCGATAT CAAA TGGCCTT TTTA AGTAGTC  
CCATCTTAGCTACGTGGTGTGGAGCTGGGT TTTC CACATCTGCTCAGGATTTG TTCT TAAA AGGTAAGAA  
TGCTTTAGATATTGCTAGT GAAA ATCATA CAAA GATGCAGAATGCTAT CAAA TGTGTGCAGCTAG TTTC  
GT TTTA GG CAAA ATGAGAAA TTG GAAA GAGAAGATTGATACTCTAATC CAAA CAAA AATCTTGATCAAG  
ACTCTCTAC GAAA ACTGTACCAAGACATT GAAA AAGCTATGCATAAGG TTG TATCGAAGATGGGG TTTC  
CGCTCTATACAGGCTCGGGTGGTAAGGTACACA CAAA AATA TTTA CAGACAAGAT TTTA CAAGAGCTTCTT  
AATAA GAAA GCACCAT TAAAT GAAA GCGATCT TTTC TAAA ATG CAAA AAGGCATTAGTTCCGTGTGCTAATC  
TTGTTGTACACTCTTA GAAA GCCAGTTAGGAAT TTTC GGAGCAGACTTCTA TAAA AGAAGTCGAAGAGAG  
TATTTA CCGAGACTTGATCGATACTAT TTTACAAA TGGGAAGTGCGGCAGGAGGAGTGACACCATTAGTT  
GATGGTGTACAT TAAA GCTATTAGAGAAG GAAA AAC TTTA CGTAGC GAACTTAGCCGGGCTATGTC TTTAC

ATCCAAGACAATC TTTCTAGGGGTGCAATCTGCTGTAGAGAAGTTGCAAGCA TTTATCCGAGATCCTAA  
GTGGGGAGCATCGGCAGTGCATACCTCTGCTGAAGAGACTCTAGCG CAAAAACAGAAG TTTGTTTC TGAT  
CTTACGCGCATC CAAA CGAGCCTAGCAGACTGGAGAGAACGTTACGGGCTA TTTG AAGAGACAAA ACTGA  
ATCACATTGTGTCTACGGACTTTG TATCGAGAACAGAAGCT TTTCTAGATACCCT GAAA AACGTTGCTGA  
AGCATGTTCTCTGGAGCAAGCTGTTGCAGAGCT CAAA GATTGTGAGGATGCTAT GAAA GCAGATCTCACT  
CATGTTGAG CAAA AAATGAATCCTACAGAGATAGAGTCTGCAAGAGAAGAG TTTA AGCAGTTGATGGAAG  
AGCTAGCTGGTATTC AAGAGCAGCTAGAACAGATCGCTCGACCTA TTTATGAAGAAGGGGTAAGCGG TAA  
ACGTTCTACTTAATACAGTCTTCTCTCATCCAGAAGCATTACGTAA GAAA GTTCAAG CAAA GAAACC  
TTGTTAGAGGC TTTA CAAA GGGCGAACAGCCTTCTCCAACGAAGAA GAAA ACGTTGAAGCAGCT TTTCTG  
AAGGATGTGAGTACTTCTCTAGTCTTGTAAAGCAAGATTAATGCGGTTAAGACAATATTAGAAGGTTCTAG  
AGGCAA GAAA ATTGCGTCCCAAGATATACGACAGCTGATTGGATTGACTGATGAGCTTGCTC TAAA GTTG  
TCCTC TTTCCAACAGGATTCTTTA GAGAG TTTG CTCTATGGATTAGAGGGGTTAAGCATTCCAGCTGCTT  
CTATAGAACAGAA GAAA GGATCTCCTAAGTCTTCTTCTATAGCAGAGAAGGTGGTGTATGCTTCTCATCA  
GCGTGTCTATAATGGGG TAAA AGC GAAA GTGAATCGCACATTAGAAGCAT TTTCA CAGCTGAT CAAA GGC  
CTACGAGGATC TTTA CGTAATGCGATGATCAC TAAA GCTGTTGTAGCGGCGATTCTCTCTGTAGCTT TTT  
CCTGCC TAGCGATTGCGCTCTTCTCTGTGCAGCTTACATGGCTTCCTATTATGCTCTGCGT TTTAGCT TTT  
GGTATTGGAAGCTATCCCTTCTGC TTTATCTATTTG GGTGGA GAAA A GAAACTG GAAA ATGAGGTTGCC  
TC TTTA GCGAAGCAGTTGG TTTG GGATGGAAGAAA GCTTTCCTTATCCAGATTTG GGGGAT CAAA ATATCA  
AGCATCTAGAGAAGATTTCGAGATG TTTATGGGCTGGATGGTGTGCGAATTACGGGTAGCTGAAGCAGC  
TTTA TTAGGAGTTCA GAAA CTTCTGAAGAG CAAA ACAAGAATC TTTAAA AAGTGTGT TAAA GCATTG  
CGGGCGGATGCGAAGGTTCTTAATAA GAAATTTA AGAAGCTTCTGAGTCATATCAGCCTCAACACTCTG  
AAGTCACAGGAGTCCAAGGTGTAACGGAACAAGAAA GCAGGGATGACGT TTTG GTAGCACAAAGATATGGC  
TGCCATAGAAGAGTTGCAAGACCAGTATCATGCAGCTTGCTTGC AA TTTGAGTCTGTGAGCATGCGATT  
TTAGCCGAACAGCG TAAAGCTAAG TTTCTG GAAA AGCTGTTAATT CAAA ACGTCGAGATGTGTCCATT  
TATCTCATCAAGAAGCTCATTATACTCAAGTAGTCAGTCATTTGAAA GAGCGCATCTCAATGAGAAA AGG  
AGCATCTACTCAACACGCTTCTAAA GAAGAGAT TTTCTA CAAA AATGAGAGAGCTGTTGTCTTTA GATGAT  
CAACTTC TAAA AGCTCATAACAGCTCAAGATGTGAAC TGGGATAATAGCATAAA CCGTCAACTGCAACAGC  
AG TTTAAA AAGTTATCTGAAGAAGGAAGCCTACAAA AAG TAAA AGCTCTGCTAGAAC TAAA ATATGTG TTT  
AGGTAATGCTGGG CAAA CCC TTTA TCATTCAAGGC TAAAGAGAGAGGT TTTG AAGCATCTTGCTCTAAC  
ACCTCTCAGCAACTTCTTCAATACGGTGAAGATCTG TTTG CATCTTACGATGGAAGTGATCGATCGGCTC  
TTCTACGG TTTG TTTA GGATCTGGATATGAGATGATCAGTGAGGCCAGCTCTGAGCTGAAGTCTCTACG  
CAAA CGTTG GAAA AGAAGCGCTTCTCAAGCCGCAATTGCTCCTGAAGATTATGA GAAA GTCTGCAGAGTG  
TTAGAACGT TTTCT TAAA GCGGAGACAGTCTGCGTCCGAAGTTAGGCTTACCTCTTGGTAAGAGCTCAG  
ATGCTACCGTTGG TTTACAACAT CAAA TACGAGATAATCAACGAGT TAAAGCTCGAGTAACCGCTTGTTA  
CCAAGAGAGTTGCAGAAA TGT TTTA CAGCATTTA GAAGATTGGGTGCG GAAA ACGCGACAGGAGTCGGCA  
GAATGT CAAA AAGTAGAAA CAAA AATACGCGAGTCTGCG CAAA AAGCCGGATCTAAGGAGAATCTTGCTG  
AATCTACAGAGATGCTAT TTTCTAGCTTAGAAGAAGA TTTG AAT TAAA ATACCTCTAGATGT TTTG CGTGC  
TAT TTTACGATC TTTA TCTTCTAAA GTTCTTCATATTAGGGAT CAAA AGTTAGAACTT GAAA AGTTAGAA  
GAGCAG TTTG CGAAGA CAAA ATATTATG TAAA AGCCAAGGAAGCTGAGTTCGAGAAGAATGGGGAAGTGT  
GGCATAATCAGTATCAGATGC TAAA AAGTCAGATGGAGAAGCTGGAGTCTCA GAAA AGAAGACTGACAGA  
TAA GAAA GAATAAAA AAAAGGAGGGCTGC TAAA GCCCCCTTT TTA GTTAGGATACAGATGTATAGAACAGA  
CTTG TTTA ATTAGCAT TTTCTG CAG CAAA AATACGAAG CAAA TAA GAAATTAGCTCATGCAACTTGAATG  
TGTGCGTTCTATATCCAATATAACGATCAGGACGAATGATAAAA CAAGGATTCTGGGTTGGCGTGGTATAA  
CTTG TGGAC TTTA GGATCCTCGGTGACAATCACGCTTACCCATTCCGCATATTCTTCTAGAAGAGCGTGG  
ACTAGATCGGGACGTTCT TTTG AAAA AAGACAAGTAGATG TTTA GCATTT TTTA AGGAATCTAATAGATAAT  
TCCCAGTGTCTAACCGTATGTC TAAA GCTCGTGATCCCGGTCTAGGGCCTTGGAT TTTCTTTA TCATTAGG  
AGACAC TTTA AATAATATCACTAGCTTCATAT TTTG ATGCGCGGTGGGAGGGATAGTATAGCTCTCCTTCC  
GCAGCATCGAGCTGCTTACACCCCTTAAGGTAATAGTACATCAGGGCTGGAGTATACATG TTTG AAAA AAA  
GAAGCTTGGTAGCTCT TTTCTGATGGACCTCAT TAAA ATGAGGCAATACATGGCTCGTT TTTA GTTCT TTT  
GGAAA GGATCAATTGGGAAGAAGCGGCTTT TTTA ATTACTGGCAGGAGCTTCCACCCTAGAT TAAA AGCG  
TCATGGATATTGGAA TTTA CTCCCAGAGGTAAGAAA AGGATAGATTATTAGCAATGCTCCCCAAG GAAA  
TATAACGGTCATGACAAA AAGGATACTGTAGAAGAGATGAGGAAA TGGAGAGAGGATCCTCTGCTAGCGC  
AAGGCTATAGGTATACAGAAG TTTA TT TTTAAATTTA GAAGAAA GAGAGCCAGAGGTA TTTG CGAGGTAT

AGCTGACGAGAGCCTCTGTAAGGGTTA TAAAAAA CAAAATTAA CAAA GCTTT TTTG TAACAGGGAGCAAGT  
GAATATGAGATTCTT CAAAAGGCTCCCCCTCCTCACAACTCA CAAA AAGAGCTTCCTTATGGATTTTTTT  
TGT TTTGATTTG TGT TTTGAGGAGATC TTTAAGATCGGGATCAGCATCCATTT CACAAGCTATAATCCAT  
TTAGGAG TAAA GATCTCTCGTCCTTCATAGACTTGTGAAGAGCTC TTTGTGCTTT CAA TAAA TAGATTCT  
GCTCTACTTGGGTAAC TGGGCGGTAGCCCAATCACCACACCGCCTAACCTTT CAAA CTCTTCGAG TAA  
ATGGGTCACCAATTCGTTATAA GAAA TTA TAAA GAAA AGGGCAACGAGAGGCTGATGATTGATTGAAC  
T TAAA AAGAACAGTACGTTG TTT CAGTGATAGCGAGCCC CAAA AATT TTT CGCC TTT ATCAAG TAAAT  
CTCCAATAGATTGATATTATCAAGAAGTTC TAAA GAAGATGATGA CAAA ACTACTGGCAGAGAGTGCAG  
GGGAGCGGAAGAGAGGCTGTTATGCTATCTCGAGAGTCTATTAC TTTA ATACGGGCTCTGTGCTGTTG C  
AAA ATGCTAGCAAGGATCAGTCCCAGGGATTGGCTCCCATGAT TAAA ACATCGATCATTGTTATCCTCA  
CAAG CAAA AATGTACT TTT CTCTCAGA GAAA ACTTCTACCTTGAAGGAGGGATA GAAA CTACG TTTG TGC  
CTAGTGGAGAAGTATACTCGAGAAGCTTT TTTAAA AGGAATCTCGAGGATA TAAA ACCTAGTGTGGCTAAT  
GGAAGA GAAA AGAGAGGCTGAACCCAGCCTCTCTAC GAAA A CAAA CTAT TAAA GA TTTG ATTG GAAA TGC  
GTTAAGAT TTT CTG CAAA ACCTCTTGGCGATAAGGAGATAAAA GCGA TTT CATGGGGAG TTT CGGGTAAC  
TCTTAGACAGCA TTTG CGCTGGAGCAGCCCC TAAA AATAGGCGTTGGTGAGCCGTA GAAA ACTACGCGATC  
TTCTAGTCTTGT TTTGGTGAGAACGGGGATTCTTCTTGGTAAGGATAGCAGGAGGATGTGATCCTGAATA  
CCTAAGAA GAAA TC GATATCATCTCGACACAGCTTGAGGGGAAGTTG TTTG AATC CAAATGC TTTA CCAA  
CTTCACCCATATCC GAAA ACTGGGTCATGGTTAGGCCAATAGTAGCACAGATCTC TTTGAGAAGGATGAC  
TCCGTCAGCAATAGGAGCCCAGACGGAGATGGCTTGAACCGTATAGTCTCTAGGTCTATAGGTGCTAGCC  
AGATGAATGGTAGTGTGACAACCTAAG GAAA CTCTGCAATACCAATGCGGTGAGGGTTGACTTCTGGGT  
A TTTA GCTACGGTGGCTAAGATATCTTCGCCGTTGCGCAGGTAGGTTCGTGCAGGGA TTTG ATCACATAT  
TCCTTCGCTAT TTT CACAGCCAGCCATATCGAATCTGGCTACAGCGATTCCAT TTTG CCGTAAGAAGGCGG  
GCTAAGTCTCGATAGACCCCATCC TTTCTGTACAA TTT CCGCGAATCCATG GAAA AAGATTACAGTAG  
GATATCCTCCTAGAGGCATAGGAGTGGTTGGGGTATGGAACATACCAAC TAAA TTATATCCGCAGCTGAG  
AACATTAACACCACGGCAATGCTCTTGAAGACCTAATTCCTTATCATTGATAGTAATGTAGG TTT CAGGA  
ATAGAGG GAAA CCCAGGCGCTTCAACAGGAGCTG CAAA ACCACTTCCAGATAAGAGTACACACAG GAAAG  
TAG CAAA CTTTTTC ATCTAGAAAAGCCC TTTATTT TTT CAAA AAGCTTCT TAAA AGAAGCGTTGAT TTTCTG  
CATAT TTTG ATT CAAA CAAGAAA CGATGGCAGAACATAATAAGG TAAA TTACTGGA TAAA ACAACTCTTT  
TTG CCTGGCAT CAAA TAATTAT TTTG TCGT TTTA GGTGTAAGAGAAGAAGGATTTT TTTAT CAAAAAATCA  
TTTTCTCACC GTGTC TAAAGTATGCGACCAGTATGTATAGTCTTAT TAAAAAAGATATTGCTAGAA TTTA  
GGTAAGATCTTGGTTCAGAAA GT GAAA CGTTATGAGGGTCTCT TTTG AA TAAATGCGAGAGCAGATCTTGA  
TTAT TTTG AAA ATAGGTATAGCATGGGGCTCAT TTTAGCAT TTTCTTGAGAAA AGTT CATT CATGGCC  
AG CAAA AACCGC GAAA TTAT CAAA TT GAAA AGTACC GAAA GTTCT GAAATGTATTGGACTGT TAAA AATA  
AAAAAAAACAAGCGGTCGACTAGAACT TAAA AAGTATGATA GAAA GCTGCGTAAGCAGCTTATCTT CAA  
AGAAGCTAAGTAGGCT TTTATCTAGCTTCTAAGATTTCCCAAGGGTGT CATGAAGTTAGAATTATTATTAG  
CC TTTA AGTATCTAATTC CAAAAA GAAA AAGACT TTT C CTCTCCATAG TTTCTGCTT TTTCTATAGGGAT  
CGTTGCTCTTGTG TTTG GCTGTCCGTGGT TTT CATGTCCGTGATCCACGGATTGCAG CAAA GATGGGTG  
GGAGACCTCGTAG TTTA CATTCTCTATTAGGATCGAACCTTCAGATAAGTACTATGAGTCTTACTACT  
AT CAAA TAGACTCTCACGCAGAAGCTTCGCAATATA TTTATAAAA ACTATAGGGGAGAAA CTCTCTGTGA  
ACAGACGGATCCTTATGATCCGGATGTAGATTT TTTA CTTCAGAAAGCT TTT CCGATCCCGAGT TTT CCG  
GATAACGGTGAGATGATAGATCCTGTTTCGTACAGCCAAT GAAA GAATGC TTT CCGTGT TTTCTCTC CGGA  
AAGGCTCT TTTG TTGAG TTTG AAGAAGGAATGGGACATGTGCACATGGATAGAGCT TTT CGGGGGCATAA  
AGGAGAACCTCGAGCCTTATCTCAGTATATCGCGTATTCATCAGACATCC TTTA CCAACAGCGAGTGCCTT  
CCT TTTGAG GAAA CCGATTATTCGACTGAAGTGTGAATCGT TTTA ATGCTTCTTCTGAAGGCTGGTTGG  
CGGAT TTTCTTGCTCTTCAAGA GAAA TTCCGAGGTATGTCCGT CAT TTTG CCTGTTGTATATCGCGACCA  
AGGGTATCGAGTTGGGGATACAGCGTCTTGTCTGTCTCTCTG TAAAAAAGAAGGTGAGGTCCGATTC  
CC TTTG CGAGTAATCGGATTCTATAATCCTGGTGTGTCTCCA TTTG GAGGGAAGACCAT TTTA TTGATA  
AGGAATTGGCTGCATCCATCCGCTCGGAATCCGAAGGGCTTGGTATGCATAATGGCTGGCAGGTA TTTCT  
TCCTAGTGTTCAGATATCCCTGT CAT GAAA CAGTCTATT CAGAAGATATTCAAGGAATCGGAAGTCTCT  
TCTTATTGG GAAA TCTCTTCTTATATGATTATGAGTTT TTTA AGCCTATCTTAGATCAGCTT CAAA GTG  
ATCAAGT TTTGT TTT C AATCG TTTCT TTTATTGTATTGATTGTTGCCTGCTCTAATATTGTGACTATGTC  
TATCCTATTAGTGAATAATAAGAAGAAG GAAA TCGGCATCCT GAAA GCAATGGGTG TTTCTTCTTCTCGG  
CTGCAATTGGTG TTTG GATTATGTGGAGCTTGGTTCAGGGCTAGTTGGAGCTCTATTGGGGTGCAT TTTAG

CTGCATTAACCC TAAA AAA TTTA GGGGT TTTG ACGCATTGGTTAAG CAAATTGCAAGGAAGAGAAGCTTT  
TAATCCATCCTTC TTTG GCGAACAACTCCCTCAAGAT TTTCACTTCCAAGTAA TTTGTTA TCATTA  
GGAGCGCTTGTCTTAGCAGCTA TTTCCGGAGCAATCCCAGCACAGCATGTTGCACGCATGCAGG TTTCTG  
ACAT TTTAAAATCTGAGTAGAACTATGGTTATTCTTGTGAGGC GAAA CATA TTTGAAAAGTGATCCAGC  
AACAAAGATGTCTGTATTCCCATAT TAAAAGATGTATCC TTTCAATTACACGCAGGGGAAGTAGTGGCTAT  
TACAGGAGCTTCTGGTAGTGG CAAAAGTTCGCTCTTACATCT TTTAGGTTACTCTAGACCAACCGAGTTCT  
GGGCAGATATTATTT TTTG TAAA CAGGTCCGTCGTGAAGAACTCCCTATT TTTGAAA CTGTAGGATAG  
GATTTAT TTTCCAAA ATTTT TATTG CTAGAAGATGATT CAGTGATTAACAACGT TTTGATGCCTGCA CA  
AAATTGCAAGGAAGGATACTGGGCAGAAA TCTAAA GCTCGAGAAA GAGCTCTTGGCTTACTAGAATCCGTA  
GGGCTGGTGGATCGGCGCAT GAAA AAGGGAGTCTCCTCTCTGGAGGA GAAAA CAAA GGGTAGCTATAG  
CGCGAGCTCTAATGAACGATCCGGAGATTGTATTAGCAGACGAACCTTCTG GAAA TTTAGACCATCGGAC  
TGCGGATACAATTACGAACCTGTTATTAGCTCTTGCAGAGAAGCATCGTGGGGTATTGATTGTGACTCAT  
GATCGGGAAGTACTGCT GAAAAGTGCACCGAGAAGAGATTCTCCGCGATGGCACCTTAATGCAGCGACAGT  
AGACA TTTGAGACGGGAACCCCTCAGGTTCCCTT GAAA GACACGGTCACCCCTAATACCATCCGGGAAT  
GATTAGACGCTTCCGTCCCTTACC CAAA CATCTACACGCTCAGGCTATCACAAGAGCGAATAAGTTGTA  
AAGCATTCGTTATCAATAACCTGAAGATTT TTTAATAA TAAA GATAGCATCTT CACAGTTCGTTGTACGC  
GTGAGTGTACCATGGGTATCT TTTAAGAGGAGTTGTTGCTAGATAC TTTCCGCTG GAAA CATGT TTTAGTC  
GCACCTCGTCTCCATCCCGGAGGAATTGATCTTGTGTAGTATTTA ACTTTTC AACAAATCCACCCACAACG  
CGTTGGGTAGTACGTGTTAT CAAA GTACGCCTCT TTTGCATTTCC ATAGAAA GATAGATAGGG GAAA CTA  
G CAAA TTCGCTAC CAAA AATTT TTTG TCGAATAGGCAAGGACCCGAGGAAGCAATACGATTGG TTTAATA  
TTTT TTTG CGAAGCATGTT CATTATTATCTACA CAAA AATAGAAA ACGATAGGGGTTGCCGAAGAACGTT  
TCTTAATGTTGGGAA CAAA TAAGGAAGCGTAGACCACGAAGCAACGTAAGGAGTACTGACTACAAGAGGA  
GAGTGGGCAGCTTCTAAGGTAAA CCAGGAAGAAGGATTATCGATTCCCTGATG TAAA TGTAGTACGTTCTC  
CTCGCTCATCTAC TTTA TGTTCT TTTGAGATAGACTCGAATCGCTTGTGTAAGAGATTCTCG TTTATTAGA  
GAGCTCTGCAGCACCGATATTAG GAAA ATGGAGAGGAAGTACTGAAA TTCGTTATAGGTTGTAAAGAAACC  
TGGATAGGAACAGGTTCCAGGTGCACAC TTTCCGACCAATCT TTTAAAGTCTAAA CGTTCGTCATGAACCG  
AAGGTAAGACCGTTCCCTCC TAAA AATACCGTATGAGAAGAAGACGTGGAGCTATAGCTGGAGTATCCAGA  
TTCTGTGCTGCTGGATACAGAACCT TTTAATAGAGAGTTGGCTGCTGCGGTTTC TAAGGAGATCTT TTTG  
CTATGTAGATCCTCCACCTGTT CAAAAGATAG TTTGAGCATTG GAAA CCTATCCCTC CAAAAGTTGCTG  
ATGCAATATAGTGTGTTCCGAATTT TTTGAATAAAA CGCTGACCAGGAATCTGGAGAATTGGCGCTTAG TTT  
G TTTTC AATCCAATTGCG GAAA CAACTATCTAATCGTT TTTCCAGAGGGGTTCCGAGCTGT CATCTCT TTTG  
AGTGTGTATAGGGAATGAGCGGCTGTGGAACATGTGACGGTATTCTTGGCATGTTGAGTGCTTTTT TTTA  
CAAA CTGCGAGGTAAGACTTCCCT GAAA AGGCGGCTGCTTCAGAAA GATC CAAA TCAGAATCTTCGGAATG  
GGATGTGGATGAGAGGCTGCGATGCTTCGGA GAAA A GAAAAGG TTTG TTTCTTTCAATTTGATAAATA  
TGATAGTCATCCAAGCTGCGTT GAAA GCCTGATTTG ATTTTCCTAATTACATAAGCTTGTCTGATTTGG  
ATTGAATCTTG GAAA TATCCATATCGATTAATACAGCTGCAATCGTATGGGATCCTACTTGAATCTGGTA  
ATTGTAATCTGATTTCTGTGAATCCTTGTAACTAGACGGACGCTTCCCTCGGTGAGGATTTG GCTTTTA  
GCCCATGTCGCCATAACATTC CAAA GGCAAGCTTGTTAATCAAGATCTTAGCCTCTCT TTTGTATCGTT  
TAACAATATCGACTAG TTTAGGAGAGTAGCTTGGGAATAAGTGT TTTGAATAACA CAAATTTCTTTTTG  
ACCAT TTTCTACTATGGGAGGGCT TTTGAAGAGGCATAGTCGCCGCGAGGTCTGGTACAC TAAAAGTAACC  
GATGCAGAAAAACTTCGAG TAAA TGAAGTTG TTTCTTC GAAA ATGGAGGTACTGATTTCTACAT CAAAAG  
AAGG TTTAGAGAATAGCTTAGTCCCTGGAGGAATAC CAAAACGACCATCCGCGCTCAGCTGAGCCGTTTC  
TCTTG TAAAAGAGTAATCTAGAATATCTCTTTCGTTACGGTATTCAGGATATTAATGGGGTCTAATTTG  
ACAATGTCAACAGCTCTACC CAAA AAGTCGACATTCGGAATCAATTC AATATCGTTATCGACTAGAGCAA  
CCTTAGGAGTTTTC TTTCTGGAGAGAAGGATTCTCTGGTGATGCGATA TTTCCACACCGTCATGAGAGCT  
GCGTAATAACGCTTGCTTAA TTTCTCTAGGAGCTCCGCATCGGA TTTCCATTTG TATAGAAGGGGCTACC  
AGGCAAGTGGCTGCGCAAGCTGAGAG TTTGGGTTCAAGAATAGTGAACAGAGCGCCGTC TTTAGTTGTCT  
CCCAAGA TAAAATATAGGGGCTATTG GAAATCGCGG TTTCCAT GAAA GAAGGTATATCGAAGATCTCCAG  
TGG CAAA CTCTCAATGAACGATGCTAGGCGGT TTTCTTCTCGATATAAGTATCTGAGTCTATAGAAA  
CGTCTAATCGTGGAT TAAA TACG GAAA AAGGTTGAATAACGTATAA GAAA GAAGGCTTAGTCAT TAAA  
ACTCTCCGGGCTGGACAGTGATTGACACCCTATAATGGAAGGAAC TTGCTTTAAAAGAAAAG CAAAAGAAAC  
TGATGAGGAGCTTAGCCTCTATTCAATCACTTCCCTATTAGGAGAGTCGATCACTG TTTGCCG TAAAAGG  
TTTA TAATGTGTGG TTTGCTGTCTG TTTGTTTC CCTAATCCTAT TTTCTCATAACGGATAGCTTGTGGCT

GGTACTCGGTTGTTTCGTCATCAGAATCTGTATCTTGTGAGTAGGTCTACTTGAAGGAGTAGGGGCCGTA  
AGCACGCTCTCTGGGACAGATAGGAGCTA**TTTGTTC**TAGAAGAGACCAGACGTCCA**TAAA**GGCCTGAA  
GCTGTGTCTCTGTAATTGGGCGAAGGATGAATAGGTCTT**CAAA**GTT**TTTA**ATCATAACCAGCACCGCTCCA  
GTTAGCAGAGC**CAAA**GATTGGAGT**TTTA**ATTGTGATGCA**CAAA**TCTTGGTATGGAGAATGCCTTCTGTT  
**TTTCTTTC**G**TAAA**GAGGAAGTTGGATACCCAA**TTTG**CTCAGTAG**TTTG**CATGTATCTTG**TTTG**GAATGGT  
TGTCGATGATTACT**TTTA**CTCGAACTCCTCTTCGCATAGCTTGGGCAAGAGCTAAGAAGAATTCTGGGCT  
TAAGAAGATATACATCAAGA**CAAA**AATACTGTCCGTTGCTTGGTTAATTGCATT**CAAA**ATCATT**TTTG**AT  
GCTGCATTAGGAAT**CAAA**CGCTGGATAGGAATGTAATTGAGCAGCTGAGGTCCGACATGAACCAGTTGGG  
GTC**TTTC**A**GAAA**AGACTGCGTCATGTAATTCTGAAC**TTTC**TATACATGCCGTCACGTTGACATCGTGATT  
GAGAGACAAGTCCGTGTAGTTGGCTGATCCTGTAAC**TACTG****TTTGGAAA**TCAGCCAACATAGTTT**TTTAT**  
GTTGGAGGGTCTTCCGTTAGTCGGACGCAAGACGACTCTCGAGT**TTTG**ACATGCTACAGGTAAGC**TTTC**  
TCCGCAATGGTA**TTTG**ACTTCTACAGGAACATGGTGCGAAGTCTGAATTAGAGATTGGATAATGTCATCA  
GATGATATGGCG**TAAA**TGCGCA**TAAA**TATCCCTC**TTTG**AGCTTGGCGAATGGTATCG**CAAA**TCATTCTTA  
GAGGATTATTATTCTGCTGCTGATGTACGGAATGGAATGTAATCAACTCTC**TTTC**TGCAAGTGGATGAGG  
CACAGGACGCTCTTGCAATTGAGGGAGTGCCTTGGATTGAGATCGCGTAACATGATGTCTTGATGATGAG  
GAATGCCGATGTGAGCGAGATTCTGTGATGACGGGCACGTT**CAGAGT**GTCTGCTAGAGCGAGAACC**TGTT**  
TGGAAGATTCCGCTTAGAT**GAAA**AGTGCCTAGAGCCTACCG**TTTC**AATGCGAGAGGATGAAGAGG**TTTC**  
TCCATGGCGATGGTAGCGGTGTGCGGAGGAGCTTCCAGTAG**TTTC**CTTAGTGAGAGTTCCGAGACTCG  
GACGATTGTGCGAAGGCTGTGAAGATCGATAAGCTCTT**GAAA**CGGACCGAGCTGTAGGAGATGATTCTGC  
AGAAGAATGGCGAGGTGAATGTGCGCGCGATGCGGATGAGAATAGCTAGA**ACTCT**TAGGATGTAAGTGG  
CTATGCCCTGATGAACCATGAATGCTCATAATATAT**TTTC**ACCTAA**TTTA**TTAAGG**TTTA**GATGC**TTTCC**  
TCTGAGAAGGCAG**GAAA**CTTGCCTTCTC**TTTC**GACTA**CAAAA**ACTCCATT**CGTTACT**GCTGTTCTGCTGAT  
GTGGAAGCATTCTCTTCGCTT**GAGT**TAGAAGAAGAGG**TTTG**CTTAGGGTCTGTTATGGATTTTT**TTTC**TCT  
TCTCATGTA**ACTGAAT**CAGCTC**TTTA**GT**CATCAAT**CTACTG**TTTGTTTC**TATATATGCC**CAAA**GCTCGTT  
ATAGCATT**CGAGT**TGTGTCTCTGTAAGCGGATTGATAATCAAGA**ACTCT**TCCAGA**TTTA**ATGTAAGACCT  
CCTCTACTCCAGTTGACGGATCCTATAATGAGTGT**CGAGCT**ATCAATACAGCAGAC**TTTGGT**ATGCAGAA  
TGCC**TT**CGCATGTACGTTCTCGTAGGACAATGCCGTTAGCCTCGAGGATAGC**TTTG**ACGCATAAGTCTCT  
TCGTA**TTTG**ACTTAGCGAATAGTAGGATACTTGTGCGAGCCTACTCGCACCTCTCCTCGATCGTGT**CGG**  
**AAAG**CCCAGCGATATAGGTGTT**CGCTAAA**TAT**TTTA**GCCGTTAAGTTCACATCTT**TTTCA**AGAGAGGCCT  
CTGTATAG**TTTG**CTGTTCCCGTAACGACAATATTAT**TGTCTATA**AGAAGGGT**TTTC**TATG**TAAA**AGAGA  
ACACCCCTCTTCGAGGTC**TAAACT**GCACA**TTTC**CTCAGTACAGTGT**TTTGAAA**AAGCCCCAT**TTG**ATAG  
TGTACGGAGACAGGCGCTCTATTAGAAGCCTCAGCTAAGGCTGCAAGAATTCTGGGGATCCGATAT**TAA**  
**ATACTTTTA**ATAGAACGCTGCGCTTAGCTTGTAGAATTG**TTTCA**CA**AAAT**CAT**TTTC**ACAGGTT**CGTTATT**  
**TCTTTG**CTGATGAGCAGAGTAGAGTTGGATCAGTTCGTGATGCTGTAAGAGTCTAGGTACGACTGGCTC  
GAAGAAGATCGGGCTCG**TTTA**GAGGAGGAAGAAGAAGTGTCTTCGGGAGTCTTGTGT**TTTC**TCTTGAGC  
CGGCGAGCA**TTTG**CTGGGAGATGGATACTGAAGAGGTAGAGGGTTGAGGGGAAGGACTTCTATCGTCTG  
TCTTGATCGTGATGATGGAATTCTCCATCTCGAGA**TTTG**TATTGCGAAGGAGTGGGGCGACGGTCTCA  
GGAGAAGAGATGTTACCGGATGACGTAGAGTGGGAGCGAGGGTTCGTATAGACGCGAACAGGTTGTCTGT  
TCCTTCCATGATCGTATTCATAG**CAAA**CAACAGGAGGGGTCTATGGGTGCGATTCCG**TTTGTAAA**TTCT  
ATCTATAGCCTGGGATACAGTATCTCTTGGTGAAGAGGGG**TTTC**GAGG**CAAA**GGGG**TTTC**ACGAATAGGT  
AGCGGAGAAGAACCGCGTGACGTA**CTAGA**ACCT**GAAA**CGCTCATTATT**TTTAAC**TTTGT**TAAA**TTAATTC  
GAACTAT**TTTAGT****TTTG**TTGTT**CGCTTTTCA**ATATAG**TTTATTTG**T**TAAAA**CA**AA**TACT**TTTA**TT**TTTAA**  
**CAAA**AG**TTTAAA**ATTGAATC**TTTA**ATATCGAAT**TAAA**CAGGAGA**ACTATTTT**TA**TAAA**AAGGCCCAT  
**ATTTCT**TTGAATTGAATGGA**TTTGT**TTGGTGTGAGTGGAGTCACTATGAGCAAGTCTTCAAGAT**TTTAT**  
GCATCCCATGGTAAGTCCAG**TTTG**GTGAGC**CAAA**AATCAGAG**TTTG**ATCATCGAT**TAAA**CAGAT**TTTGC**  
ATG**CAAA**GAATCTACTGTTGTAACAGAT**TTTA**ACAGTAGTAGAGCTGAGATTCTGTGTAATATGCTAGT  
GTATGGGCGCTCTCTT**TTTA**TTGATTACGATAGTAATGGTTACTCCTCGTAAGCGTGCTTGTCTAAGG  
C**TAAA**AAGATCTCGGGATGAGAGAAGATATTCATAGCAATT**TTTA**TAGTTCTCTGAGCT**TTTTG**AATCTC  
TTGGATGATAGGCAAGGCTT**AGTAT**TTGGATTGAG**GAA**AGGGAAGTGGGTAATAG**GAA**ATGG**TTG**CGAG  
CCGATA**GAA**ACTGAGCCTCGAGTACCGCT**CAAA**AT**TAAA**GAATATAGCGCCGGG**TTTGA**ATAAGAGCTG  
TTAGGTTGATGTC**TTTAAAGAAA**GAAG**TTTA**GTGATGTTAGCCGTTCCATAAT**TGTTAG**CTGATTGTC  
AATCAGTGT**CTGTTTCT**TATGTAAG**CAAA**TT**TG**AGGATTGCCTCTCAATTCCACATAGAG**TTTA**GATTCC  
CGATCCCAATTGGATAGATTAG**GAAA**GTTCATGCT**GAAA**CAATAACCGGAATGTTGCGACGAACGGCTC



GAATTAATGCCCGAATAA**TTTC**AGGAGAACCAATAT**TAAAA**ATTCTCATTGTGATTATTCGGTTAGCCTG  
TAGGATAGCATCGCATAGCATT**TTTG**CGGATCGTTGTGG**TTTGTTTG**GTGAGTTGAGTGAACACAATG  
GGTCCGGATCTGCAG**TAAA**AGGTGCAGTATAGGTAAGGATCTGC**TTTG**CTGATCACTTCTT**TTTG**TCG  
**TTTC**CAATCGCT**TTTG**TG**TTTAG**CCGAAT**TAAA**GATATCTGTTGCCG**TTT**ATCCGTACGAGCAAC**TAA**GA  
AGAGTCT**TTTG**GAGAAGGAGTAT**TTTG**AGATGTGTGAGGGGGGGGGGGTGGATCGAGCGCGACGGCGT  
CCTCGAGAATGAGAGACT**TTTC**CATT**CAG**AT**TTT**AGGAGAATCTGTGGAAGAAGCGGGTCCGGAG  
G**TTTAAA**AAGATCGCTGTAT**TTTAAA**GAA**GAAA**AGCCTGTACACTCATAACATTAAGGTCTGGCTAGA  
**AAAGAAA**GAGACC**TAAA**TAA**GAAA**GATTATAAGATAATTGTCTTTTT**TTTCTAAA**AAGTTA**GAAA**AA**GAA**  
**AAAA**TCC**TTTATA**CAAGATGAGTTACT**TTTTA**TTCATCGTCGTAT**TTT**ATGTTGTGCACGAGCTGACTT  
**TTTTA**TTTT**TTTTA**AGCTGTGACTTCGCGGCTTAGGGACATAGCTTGTCCCA**CAAA**T**TAA**GAAGGC**GAA**  
**AG**CTGGCTAGGTGTGCGTTGATGGATGAAGATAAGGTCTTCTATATTGTATTGAAGACCTCGGACAGTCC  
AGTTCGCAGAACCTGTGATAAGGAGGTTGGTATCGAT**TAAA**CCGAC**TTTG**CAATGGAGGAGTGCATTCTC  
TTCCACTACCACGTCACGAAG**TTTG**ACT**TTTG**AGTTGAGATCTTGCAAGGCATAGAATAGAACGGC**TTTA**  
TTGTGAGGGTTGACAAGCACCGTTACTTCAACCCCTCTCTGCGCCGCTTGATGAAGAGCGTGAAGGACCT  
CTTCGTGAGAGAGAACAAGCATAGCAACGCGGATGGTT**TTTA**CTGCAGATTGTACCGC**TTTA**ACAAC**TTC**  
ATCAACTCCTTGATGATTGTGGCAGTATAGACTACAGTATTCTA**TTTG**CTGCGAGCCACCGGTAATCCAG  
CCAGATTGTTGGGAGACGACCAATTGGCCAAGAGATGGATTGCGGATGATAGCAACTAGGTTGATGTCAC  
GAGAGAATGCGGCGTCAG**GAAA**ATTCGCGGAGCCTGTAATCACTAGGCTTCCGTCAACTACTATATT**TTT**  
**AC**AGTGTAGTCGCGCCTGGTTAGTAGC**TTTG**AA**TTTG**CACGTTAGGATGTCGAATAAGGGCT**TTTG**GGCA  
GCAGATGTATTGATATTGTAATGGATCCGTACGCCGTTATTTCGCTCGCTCTAGAAGAGCTGCAGCAATCT  
CTTCAGAAG**TAAA**CCTATAGAT**TTTG**TATA**TAAA**TATGGTAT**TTTG**CCTGCTTAATCGCTTGAAGAATAGC  
TCGAAGAGGAGATGGTCCAGATTCTGTAGAGAAGAGTTGTATAGCCTCTCCATG**TAAA**ATT**GAAA**CATGGA  
GAGATGTTGGAAGGAGTTG**TTTC**TATAGCTTGGGTTG**CAAAA**AGAGTTCGTGTGTTAGCTTCTT**TTTCTA**  
**AA**TCCCTCTATCTCTGGCAGTAGCTTGAGGGAGAGATTCTGGTTGTTGTAGAGCTGGAGGTTGAGGAGC  
GGCTCTGGATAGGAA**GAAA**GGCCTTGTGTCCAGTTGTAGTGTAAAGGCTCTTGTACAACGGCAGGAGGA  
GCATACTCAAGATAGGGGATTGAACCCATAAAGGTATGTAGCGTAAGGGTCTAATACAGCCTAAGGCT  
GTTGAGGCGCTGGAGG**GAAA**GAAGGAGTGAATGTCTCGAAGTGATGA**GAAA**CAGCTCCGGGAGTGAATTC  
TGGTGCGGTTGGATTGAGTGTGGAACCGATATGCAGTCCCTTCTACAGCAGCAGCTAACTGATGCTGAGGA  
AGATCCTCAGGAGCAATGTAGTAAGCTCCCTGCATAGAAGGATCTTCGGGACCATCAGTTGGTTGAGATT  
CTGGAGGAGGAG**TTTC**GTTCTCTCCGTAGGGAG**GAAA**ATTATTGTGAT**TTTC**TGTTAACGCTCATA**TAAA**  
AAAGAAGCTTTTT**TTTC**GACGCT**TAAA**CGTT**TTTAG**AC**TAA**ATGTGCT**TTTG**TT**TTTAAA**TAATA**AAAA**  
TACGTTCT**TTT**ATT**TTT**ATAACGACCTAGATA**TAAA**AAGAATGGGATCTTT**TTAAA**GACCT**TTA**TGCTTC  
TATTATACAGACGTTAATTGGAAGC**TTTG**CGCTCTATTGTGAG**GAAA**AGAGGAGGGGATGGTCTGCCT  
CCGAGAGAACCTTAGAA**GAAA**AG**TTT**ATAAGAGGATCCGTTA**TTT**ACT**GAAA**GATCATATCCTCTGATCCA  
CTGTGTTCCACAAGAGCATG**TAAA**GAGA**GAAA**ACA**TTTC**TT**TA**GCTATATCTTGACAGATCAAGT**TTT**  
**CT**TTCTTGTGAGTGTAGATGAG**GAAA**GCCACGTGCAACGATTGATAG**CAAAA**ATACTTG**CAAA**GGCGAG  
AA**TTTC**TT**TC**GATCTAAGAGCGCGGAGCGTGCTC**CAAA**TCCGAGCATCTGCT**GAAA**GGATACGTTCT**T**  
**TTG**TTCTGGAGGATGTGGTTCCAGAGATATCCTAGTAGAGATGTA**ACT**TATAGCTGTAGAGAA**TTT**AGACG  
CAGCCTC**TTTAG**CG**GAAA**TCCCTCGAGATAT**TTTG**CTTAG**AAA**GCCT**TTT**ACAAGATAAGGACGAGACAG  
CTCAGGCTTGTCAT**TTTAG**CTTGAGTAGTCGTTCT**TTTG**CTT**CAT**TGGCTATCGATCGCGCCTCT**T**CAG**AA**  
**AG**TCGATGAGGTTGCTCAGTCA**TAAA**AAT**TTTC**CA**TTT**CTGTAGGGGAGAGCTT**TTT**AAGCGCTCATCA  
TAAGTAGATGGAGGAGTAGGTTCT**TTTAG**AGGCTTCTAC**TTTC**GG**TTTAG**AA**ACT**CGCAG**TTTG**CTTAATT  
CCTGTTGAATTAATGT**TTT**ATGATACGGGAATAGAGAAGAGAGT**TTTG**CTTCT**TAAA**TCTGGAGTAGGCTC  
TTCAAGAATACATTGGATCCCTGTGAGA**TAAA**GAATGGGCTGAAGAGTCGCCGAT**TT**CTGCAGCAAGAGAC  
TCATTGT**TTTCTTT****GAAA**CCTAATAGGAG**TTTC**GAATGAGGGGAATCT**TTTAG****CAAA**T**CAC**CGGAT**TTT**A  
CGAATAGATCCGGCAATGG**TAAA**AGC**TAAA**TAGCTTGCACAGACTCTTGACAGCTCTGT**CGAA****TAA**GA  
TGGATTCAATCGATAAGCTATAAGGGTATCAAGAGCACC**TTTAC****CAAA**AGG**TTTG**CTT**TC**GATTA**GAAA**  
TC**TTTG**TAAGTGCTAGCGGATAGTACTTG**TAAA**CCATCTACGCCGT**TTTC**GCAAGATAAGCG**TTT**AGCG  
CGATGTTATTAAGCACC**TTTG**TT**TA**GCATTCT**TTTG**CCCAATCT**TTT**GAA**CA**ATACGGAAGGTAGTTC  
**TTTG**GAAGAATACACTGATT**CG**CTGT**TTT**ATCACT**GAA**ACGAATAT**TTTC**AAGAT**TTTC**CTTCCATAATA  
GCATCA**CAAA**TAGTCCGATACTTGGG**GAA**ATGATCTCTATCTAC**TAAA**GGT**TTTC**TAGCCACGTAGATAT  
**TTTG**TAGAGTGATAATGGGGGAGCGTTGTTCTTG**GAA**AGCGACCTTAGCCCG**TTTC**CGGT**TTT**A**CAA**  
AACGAT**CAAAA**ATAGTTCGTGTAG**TTTG**ATAGGTCGT**TAAA**CA**TTTG**TAGGCAATTAGCCCTCA**CAAG**C

GAGCAAACACGTAATAGGTGCTGCGAGAATATTGCATACCACACAAAGAATGCGTTTACACACAAAGACA  
CCACTTTGTCTGAAAACAGAGGAATCGTTTTCCTCCATAAGTTTTAACAGATACAAGAGACC AAAATCC  
TCGAATGATTGGATAGAGAAGAACGTTCCCTAAGCGCTCCAATGGGTGAGGGCCGAGCTCCGGCGCCAAG  
TATTTATCAAAATGTTACGATCATGAGTGTTCTCTATTGCGGTTTGTA AAAAAGG GAAAAGAGGT TAGGTA  
AGAGTGTGTTGTTAAGCATT TTTAATTTTTTTAATGAATTTTTAGAGGCGGGGAATGTA ACTCTTTAA  
GTTACAAACACAAAATAAGTTTTTTTATAGATGTTTTAATTTAAA AAATCCTTAA CAAAATTTGTTTTT  
GGGTC AAAATTGACCAGAATT TTTAGTCAGAGGGCCTT GAAATGTTTGTTGTCGTTTCGATAAAATCCCGTT  
GCAGAGCGGATGTCCCGATTTTTTTGAAAGGACAGGAAACTTTCCTCTCCATTGTGTGGCAAGAGGGAT  
CAATGT TTTATATCGTGTGAAACAAA TCCCTA ACTATCCTTCATGCTA TTTCTCACA TAAAGAGA TTTTCG  
TGTTGTCGTCGATTGCAAA CATTGTGATCTGTATTCTCACAGGGCCTCTGATGTTATTGGCCACTGTGT  
TAGGATTATTAGCGTATAGGT TTTCTTCTACTTACCAGACTTC TTTACAAGAACGC TTTTCGTTA TAAATA  
TGAA CAAAAGCAAGC TTTAGATGAATACCGTGATAGGGAAGAAA AAGTCATTACGCTTCAGAAGTTTTGT  
AGAGGATTTCTAGTTAGAAATCATTTGCTCAACCAA GAAACTTTAACAACGTGTAAGCAATGGGGGCAA  
AACTATTAGAAGGAGAAA AATTCCCAAGGGTCCAGAAGGACGGTCTCTGTATATA TTTCAAAAACAGTT  
TCCTTC TTTAGTAGAAAAC TTTCTATTCGAAGAAA AACTTCTCTGTTTCACGAATTTCTGTAGATTC AATG  
TGCTCTATAAAGAAAATCCACAAGC TTTTCGATGAGGCGAT CAAA GAACTCTTA TTTCTATTTAAA GAAG  
TGCA TTTTCAGGGAT TTTGTTGTA GAAA CAGAGTCTCCAACAGACGA TTTCCCTTAGCCGTGAAA GTACA  
CAACTATTGGGTATGCCACGATACGATAATTTA CTTTTATTTA TTCAAGAAG GAAAAGATGGCTCTCCA  
GAAGGGCGTATAGGACTGGTCGATCTAGAAA CTT TTTCTTGGTCTCCACATCCATGCCCGTAGAAGAAC  
TAGCTGTGATG TTTCTTATGCATAAAA GAGCTTCTCATGACAGAGGC GAAAAAACTA CAAATCCC TTTCTC  
TACAAA GGAGGTTCGAGCTTCTGTAGAGAAA GGGCTTGCTTTT TTTGAACATATGCTAGGGCATCAAGAT  
TTTTGTTCCAAA AAAGCGTAACGCCATTGCGTAATTTGTGCCCTTATCTTCATCTAGAAGTATGGAGAT  
TCTCACT GAAAATT TTTGATAT TTTAAAAGCTGCTATTCAAC TAAA TGGAGCACTCAATGTTCTGTTATC  
TCCAGATATTCCGAGAGCGTTGAGTGCTA TTTTCGATAAGCAATGGTTGGCTATTAGCTCCAGGTTACG  
TCATCGTTACTCGAGCAAG TTTCTA CAAA CATCTATCAGTCTCATACTGAAGAGGC TAAACGAG TAAAT  
CTTCAGGGACT TTTATCATGTGTCGATCTCCTATCTTCCG GAAAAGCATCTTCAT TAAAAATCTCCAGA  
ATTAT TAAA CAAGAAA TTGCAGTTGCTTCCAGAGGA GAAAGAAA TCAGCGAGGCGCTTGCTTCTCTATGT  
TTACGTGCAGTAATGGAAGAGCTAGTAGCAACAG GAAATATTTA TTCTTATGATTCTATGGATGATTTTT  
TTGAAGGGCAGTATTGTGCGATTGCTTATTAGATCATCACTTGAGAGGT TTTCTCTA TTTTCGATACGATA  
TACTTT TTTGAGTTATGACGATATCCTCCACAACAACACCTTC TAAAAGTAGTTC TTGT TTTTCAGTTT  
AGAAACAAACAAA GAGCCTGTGAAGACGTATCGGGTTACATCTATAGCGTTGGTAGCTATTGGGCTTTTG  
CTGCTAATGATTAGCTCCTTGCTCCTATTGCTTAGGGTTCCCTATGACTATGCCTTG TTTGGTTATAAGTA  
GTAGTTGTATGAGCTGTGGAGTAGTTCTTGTGGATC CAAAATAGAGGGAATCTGT TTTGGCTAATCGAA  
CTTTCTCATT CAAA GATTCTGGGCTGTAATCCTATATTATCAGGTC GAAA TGGTTTT TTTCTTCTGAA  
AACTCTTGC TTTATGGTAGATTCTCCGAACGT TTTCTATGCAGCATGTGTAATACTTCTTAATTAGAGGT  
AAGAGTAATGTGGACGGACATACT TTTAGTCTGCGAGATTACTATATCTACAACCACAATGACA TTTGCG  
GTC GAAA GTATGATTCCTATCCACTAAGGT TTTAAT TAAA TCCAGTTGATAAAA GAAGT TTTCTAAGCAA  
T GAAA TTCTATACTTACTGCAATTCATGCT TTTGGAATCTTCGGGATAGAGCAAGAGGAGAGTCGAAGAG  
AGCGAAGGCTTATGATAATTACCTCTGAAGCTTGATGTCTTGGATACAGCTGGGAAGCCTCACTGGA  
AAATCCCTGAAGGATTCCTTGCAA TTTGCATTTGCTTATTACCGTTCCTTGGGTAGAGCATTGGGT GAAAA  
GTCTCTAAGAAGAGGATCTCTCATTCAGCTCCCTGCACGAAGCATTCAGGTGTGTTGATTACAACG CAA  
ACAGGATAC TTTGCTCGGCAGAATAGACGAGGAGGGTTCCAAGTCTTCTATAGTA TTTACGGATTAGAAG  
G GAAA GTGCAACCACACCAAGCTCCTGGAGATATGCTATGCGACATTACTGAAGACTAGTGTTAACGGTC  
AAA GATGTGGAT GAAA GCGACTACCAACAGAAA CGAA TTTATGTGGT TTTAGA TTTAGCGACGGAAGAAG  
AGCGTAGGTTGCGAGCAGATAAGAACGTGATCCTTATTCCTGGAGGGGAGAATCTAAG GAAAA GAAAATA  
AGGTAGCATATA TTTAT GAAATGTTGTAATACTATAGCATTACAAA AAGGTGCGATAT GAAAAATCAAGA  
GGAGTCGGCTGGCAAGCT TTTCTGACATTATGCTC TAAAATG CAAA AA GAAA AGTT TTTACAAGACCTT  
TTTTCTGCTGTT TTTGCT TTTGGCGAACG TAAA GATGTCGCTTCTCGCTATCATATCATTCGAGCTCTTT  
TAGAAGGGGAGCTCACT CAAA GAGAGATAGCAGAGAAA TACGGAGTCAGTATCGCA CAAATACCAGAGG  
ATCTAATGCCCT TAAA GGATCAGATCCTCAAT TTTAAA GAGTT TTTACAAA AAGAGATCTGATCTTCTTT  
GTAAAATA CAAA TAAGATT GAAA GTA TTTGTATGCACGCGTTGTTAATGAA CAAA TATTCTGT TTTAGCA  
GTTTTG GTACGTAAGTATAGCTGCAGCATGCCATG CAAATCAGCT TTTCAAGCTGATTGCTTCCAAGATA  
TTCAAA AATTCATCTCTTACAGCGTGCCTGGC TTTCT TTTGAAA GCTGGCGCTTATCTACTTGGCGATA

GCCTAATTAAGAAGCCTTTTATTTGATTAAGAGATGTTCTTATAGAAGTAAGAGCGTCTTTTTTTCGCGA  
GGATTATTCTGTCCAGTTTTTTTCATGATTTTAACACTATAATTTTATGGA GAAAAGATGTTCAAACA  
TAAAATCATCTTTTGGGGAGCGTTCCTCCCGAAGAACTATTAGCCCCTATACAGAATCTAAAAGCGGAA  
TGGGAGATTCTCAAAACTCAGCAAA GTTTTTTA TCTGAAGTAGATTGTATTTTGAAA AACTATGCGGGGA  
GACAAA CTCTCTGACTGAAGTTAAGAATTTTGCTCGAGCTATTGATGGCCCTAGAGTATTTCTTAAACG  
CGAAGATCTTTTGCATACAGGAGCACATAAACTGAATAATGCTCTTGGTCAGTGTTTGCTTGC TAAATAT  
CTTGGGAAAACACGTGTTGTAGCTGAAA CAGGTGCGGGACAACATGGAGTAGCAACAGCAACAGCGTGTG  
CTTATCTAGGATTAGATTGTGTAGTATACATGGGAGCAAAAGATGTGGAACGACA GAAACAAA TGTAGA  
GAAAATGCGCTTTTAAAGGTGCTGAAGTCGTTTCGTAA CAAAAGGATCTTGTGGACTCAAA GATGCAGTT  
AATCAAGCTCTACAAGATTGGGCAACAACACTCA TTTACTACTATTGCTTAGGATCGGCCTTAGGAC  
CTTTA CTTATCCCGATATCGTTCGATTTTTTCAGTCTGTTATAAGCGCTGAAGT GAAAGAGCAAA TCCA  
TGCAGTTGCAGGAAGAGATCCTGATATTCTGATTGCATGTATCGGAGGTGGCTCCAACGCTATTGGATT T  
TTC CATCATTTTA TCCCGAATC CAAAAGTCCAATTAATTGGAGTGGAAAGGGGAGGACTGGGCA TTTCTT  
CAGGAAAACATGCAGCACGTTTTGCAACAGGGCGACCTGGAGTATCCACGGATTTTAATTCGTATCTTCT  
TCAAGATGACGATGGACAAGTATTA CAAACTCACTCCA TTTCCGCTGGATTAGATTATCCTTCAGTTGGG  
CCAGATCATGCC GAAA TGCATGAGTCAGGACGAGCCTTTTA TACATTAGCCACCGATGAAGAGGCGTTAC  
GAGCTTT TTTCTGCTTACTAGAAA TGAGGGGATTATTCCTGCATTGGAGTCTTCACATGCTCTCGCACA  
TTTAG TTTTCGATTGCTCCTTCTCTAC CAAAGGAA CAAATCGTCATCGTTAACTTATCTGGAAGAGGTGAT  
AAGGATCTTCCA CAAA TCATCCGCA GAAACAGAGGAA TTTA TGAG TAAAATTAACCCAAGTT TTTAAACAA  
ACTAAGCCATGTATTGGCTATCTAACCGCTGGTGTATGGCGGTACTAGTTATACTATTGAGGCGG CAAAAG  
CTCTGATTCAAGGAGGTGTTGATATTCTGGAAGTAGGATTTTCCTT TTTCTGATCCTGTTGCAGATAATCC  
AGAAA TCAAGTATCTCATGATCGGGC TTTAGCAGAAAATCTGACGTCAGAAAAC TTTGTTAGAGATCGTA  
GAAGGTATCCGAGCT TTTAATCAAGAAGTCCCATTTGATCTTATATAGCTACTACAATCCGCTTCTA CAAA  
GGGACTTAGATTATCTACGCAGAC TAAAAGACGCGGAA TAAATGGTGTGTGCGTTATAGATCTTCCAGC  
ACC TTTATCACACGGA GAAAAATCTCCATTTTTTGAAGATCTTTTAGCTGTAGGATTGGATCCTAT TTTG  
CTTAT TTTCTGCAGGGACAACGCCGGAACGGATGTC TTTAATACAAGAATACGCAAGAGGCTTTTC TGTATT  
ATATCCCATATGAAGCTACGAGAGATTCTGAAGTAGGTAT CAAA GAAGAATTTTCGAAAAGTCAGAGAACA  
TTTTGATCTTCCAATTGTAGATAGAAGAGATATTTG TGATAAAA AAAGAAGCTGCACATGTGCTGAATTAT  
TCAGATGG TTTCAATTGT GAAAACAGCG TTTGTTTCAT CAAACAACAATGGATTCTTCGGTAGAGACTCTGA  
CTGCAC TTGCACAAA CAGTTATTCTGGATAATTTA TGAATATGAATATGAAGCCCAGGCATCGATATCT  
GGCTTCATAGTTGTCTGTATAGATTAGAAGATAACA ACTCTCCTAATTCAACATAA TAAATATTATCAG  
ACCT TTTGTTTT TTTATAAAAAGCCCC TACGAGGCTTCTCT TTTTC GAA CAAA ACTTGTCT TAAAAGAATAT  
GCGACAGTACCGTCACTCTTGATAGTCTTGCATGGAATCATATCC TTTGATGAGC TTTATTTGAACCCAT  
AGATTCATGAGACCGT CAAAAAGATCTTCAACAAGA TTTTCGTGTGCATCGTGCTC GAAACTCATCTTCGG  
ACATTGAACAAT TTTCTGGTTTCT TAAACAAA AATAACGATTCTTGA TAAATAATCTCGTTGAT CAAAGC  
TTCTAATAATACAGATT TTTTCGAAA ATTGGAGAACGCATAAGCACTATATCTCCAACAGTGACTTGATTG  
GATAACGTCATTGCTTGCCTCGGCTTCGAGCTGTT TTTGCAA CAAAGC TTTGCATACTGGATTTGCTAGTT  
TTTG TAA TAAAGGTGCGC CAAA TTCCATGTTATAATCAGATATATAATTATTCTCGTCTATAGAATAACC  
TTCCACAT TTTAAGTTGTCGTTTGAATA TAAAAGAACC GTTGT TTTCT GAAA ACTT TTTGAGTAA GAAA  
GGATT TTTATTTA ACTGAAGTAGTCTT TTTGCCAA GAAAACATGCTGGTT TTTACAAA CAGTGTGTGA  
TAATTCAT TTTCTCAAC CAAA TCCGGTAGAGGT TTTAAAG TAAA ATAGTCTACCCCCCCTATTGCTA  
GATTGACAACACATGCTCCCTCACCCATTACTACGGTTTT TTTCTA CAAACAG TTTATTG TAAA TAAGATC  
TTCTAATAGATTTT TTTGTTTTTTC GAATAACTGAGG GAAATATCC TAAACAAA ATAGCCGGAGCATGCT  
AAGATGGCTTGAT CAAATTTGTTTGGATT TTTCTCTGATAAGAGATATGCCAGACTGAGCAGAAGTTACT T  
TTATTTGAGAGGCCATCCCCCTATTACAG CAAA TCTCAGAAGATCCCAGCGGTTCTAGTCTATCAGGT  
AGCGCACCTGATTGTGATTTATC GAAA AAAATAAGCA TTTACACCCCT TTTAT GAAA AAAATGCCAGCA  
TCCTATAGAGAGGTTGAATAATTGTTAAGGTT TTTCTTTTTTT TTTATTGGTAACA GAAA AACAGT TTTGG  
CTTT TTTGCTATGGTT TTTGTACAATCCCCTGGCCAGGTAATTGACGTTATT GAAAGTACTACAACATTA  
TTTGATTG TTTGCT GAAA CTCTATGCATCACAGGAAGTT TTTA GCAG TTTCCATTGC TTTTCGTAAG TTTA  
GCT TTTG GGGTAACATCTGTTATCAT CAAAAAGAAGAAC CAAA AGATGTTTTC GGGATTGCGATCTGTC  
ATGATCCAATGTC TTTAGATCCGCGTCAGGTTTT TTTAAG CAAA GATG TTTCTATTG TAAA AGCTCTCTA  
TGAAGGGTTAGTCCGG GAAAAGAAGCTGCGTTCCAGCTAGCT TTTG GCAGAAA GATATCATCAATCTGAT  
GATGGTTGTGTTTA TACTTTTT TTTCTAAA AAATACAT TCTGGAGCAACGGAGATGTTGTAACAGCATATG

ATTTTGAAGAGTCTAT TAAACAAATTTATTTTC CGAGAAATTGATAACCCTTCGTTACGCTCTCTTGCATT  
AAT TAAA AATTCTCATGCTGT TTTAACAGGAGCTCTCCCTGTTGAAGA TTTAGGTGTTAGAGC TTTGAAT  
GC GAAA ACTCTAGAAA TTGTTT TAGAAA ACCCG TTTCTTAT TTTCTAGAGATATTGGCGCACCCGGTTT  
TTTATCCGGTGCACACCTCT TTTACGAGAATATTA CAAA GATAAGCGTAA CAAA CGCGT TTTCCGATGAT  
TTCTAATGGTCCT TTTGCGATTCAATGTTATGAGCCG CAAAGATA TTTACTAATCAA CAAA ACCCTCTG  
TATCATGCCAAGCACGATGTTCTGT TAAA ATTCGGTATG TTTG CAGATAGTTCTGATATCCATACAGCTA  
TGCAGTTATTC CAAA AAAATCATATCGA TTTAGTTGGGTTACCTGGAGCTCCTCCT TTTCTTTA GAAGA  
A CAAAGAAATCTCCCTAGAGAAA AATTA TTTGATTATCCTGTATTGAGTTGCTCTGT TTTA ATCTGTAAC  
ATTCAT CAAACACC TTTAAATAATCCTTCGCTGAGAACAGCCCTCTC TTTAGCAATCAATCGA GAAA CT  
TAT TAAA ACTAGCAGG TAAAGGCTGTAGCGCTACGAGC TTTG TTCACCCACAATTATCTCAGATACCTGC  
TACTAC TTTGTCTCAAGATGAGCGGATTGCT TTTAG CAAA AGGCTACTTGACCGAAGC TTTAAA GAC TTTA  
TCTCAAGAAGA TTTAGAAA AAATTACATTAAT TTTA TCCTATAGAATCTG TTTG CTTACGAGCCGTTGTTC  
AAGAAA TTCGCCAACAAATTA TTTGATGTACTGGGA TTTAAA TTTCTACATTAGGATTAGAATATCATTG  
TTTT TTTAGACAAA CGTTCAGAGGAGAATTCTCCTTAGCAACTGGTAATTGGATTGCAGACTATCATCAA  
GCTAGTGC TTTCTGTCTGTCTTAGTAATGGGACAAGATA TAAA GAC TTTCAATTGATTAACTGGCAGA  
ACC AAA AGTACACAAA TATAGTTGCTCAACTTCTGATTCAAGAATCAAGCGACCTACAGCTTATGGCAGA  
GCAGTTGTTGCT TAAAGAAA GTCTCTTATTCTCTATACCACCTCGATTATGTGTATGC GAAA CAGCCT  
CGGGTGTCTGATCTC CAAACCTCTTCTCTTGGAGAAA TTGA TTTAAA AAGAG TTTCAATTAGCTGAAGGAT  
AGACGTCCCAAGATAGCAACGAGATGTATTAT TTTGATTTCTGTTGCTAACACAAGCAGACAAGCAATAGC  
G CAAA AGGCTGCAGCTGAAGCCATAGGCATTGTGAT GAAA CCTAATA GAAA TAGCTTCGTAGAGCAAGAT  
ACTTTA CCG CAAA ATATCGAGAGTCATCCCAGGTA TTTCTGCAAGCACACTTGA TAAA TAGCAATGCCGA  
AACCAACAAGAGCCAATGGAAGCGTATATATCTTAATT GAAA ATATCTCACGATATGCGGCAATACCTAG  
AATTACAAC TAAAG GAAA CAAGCAGATTC TTTG GTAATAG CAAA GAAGACATGGCTCTACATTCAGAATA  
TAGCTGTAAT AAA CACTCATAAGCGTTCTTATACAA GAAA ACAGCCAAGCAAGATA TAAA CAATAAGAAC  
GTAAGTGT TTTGATCACCGGACTTCTCTTCTATCGCTTGTAGATGACGCAGTTGAGTAATCACTCTCTCG  
ATCTCAT CAAA AGTGGGATCTTCAATAAGATAATCTCCTACGACTGCAGTAGGTGTTGCAAGTTGCCAC  
CCATGAT TTTGAGATCCATAGATATTGTTCTT TTTA AGCTGCTCCG TAAATC TTTGAGAA TTTA TGCCTG  
TAT TAAACC TTTGGATTAA TTTCTCTTCCGGAATGCGTAGGGATCT TTTCTGCTAAT TTTGCAAGTACT  
TCAGGAGTTGCCAGTGTGATCCT TTTCTGTTTT TTTA TATGTGAGAATTCTGTG GAAA TATTCCATATATG  
CTTCTGGATCTGGACGCTTCGGATCGTGATGG TAAACGCACAGTAATGCTTGTGCAGCAGGCATTGAGCC  
ACGAA TAAA ACATACAGGAAC TAAA GTCAGAGAAGCTTACCAGTGTCAA CAAA ATGTTTTTTAAT CAAA  
GGAAA TACTTCCGAA GAAA ACTCTTACAGGCAGAACAAAGATGGTCTT CAAA AACGGTGATATTAATAG  
GTGCATAAGGATCCCCTATCGTAGG GAAA TAC TTTGCTGTGGTTGGAATATGCGTCT TTTGGTGGCATAAT  
CGAACGTTAGTGTATCATTAACTTACACA CAAA CAAA CCTAGTGCCGTAGAAA TAATAAGGATC  
TTCTTTCTCAAGGGAGTTCTCGTATCCATCCTCCGTTAAGGATTGAGATAAGA CAAA AATAAAAAAAC  
GAAA CCGT TTTCTTGTCT GAAATAAA AGAAGCTTC TTTA TAAAAAAA ACTTTTCTTTCTCTCAGACTT  
CTTATGAGTCAA GAAACTCAACTAGTCTTGGTGTATGGAGAAGGATTT TTTAGAAA ATG TTTATCGTCAT  
TTCTCGTTACCGTTTT TTTAAA TTAAGTATACTTCCAGCTCTTCTCGGACTCTGGCTATTTTTTTA CTCTA  
ATATCTTAACTA TTTGGATTCTTCTGTAT TTTA TCAGATAAAA TTTGCGGCGTCT TTTAAT TTTATT  
ATCAGC TTTATCCT TTTATAATCCTGTTAT TTTG CAACTAGGCAT TTTAATTGGGCTCTGGG TTTCTTTCT  
TTTCTTGTCTTCCGACCTACTTCC TTTAGTAT TTTGCTCATGATTCGCTACTAGGT TTTGCTACACTAG  
CTATTATT TTTCTAATCCCTAATCGTCTGAAGATCTAGAAGTTGGTCTACTATTCAGAAA CTGGCA  
TTATAATCCTTCTCCGGAGG GAAA AGAGCTGCGGTTCTTATT TTTGCT TTTGTAGGATGGTTA CAAAGT  
CGCTACTTAACTTCCGCAGCACTCAATATTGCTGATGCAGACACCTCCTGCTCCTGTTTT TTTCTCTA  
CACTGATGGTTA TTTACTCCATGCTTATCGTGTGTC TTTGACTGGCGGAGAGCGTCTGGCATACTCA  
ACC CAAAGTAGT TTTCAATTACAGCAATTCTATTATTCATAGCTATAGGGCTAACTCTAGCAGCTATTCTT  
TTATCTCAACTAT TTTCTGACAAA TTATGAAGGTGTGTGCTGACAGTAGCTCCGGTGT TTTCTTTAGCAT  
TTTT TTTA TGAT GAAA TTCGAGCAACATGGAATTATC TTTCC CAAA ATTA CT CAAA TAGAAA ACAGCTAGC  
CATAACAGCCT TTTACGGGTCTGAATACTATAAGGAATCT TTTGTTCTGGGAAGAGCGTTCTGTATTACCA  
TTCTCCCAAGCGTGAAGCAGGCT TTTGCGGGATTATC TTTCCC TTTGAATCTTATT TTTGCTGCATAT  
TCTCTATTTTTTTCTGTGCAACTGAATG TAAA CTTATCTATTCTGACACATGCCGCTTC TTTGTAAA TAG  
CGCTGCTGGTTTTA TTCTTGTGTTATCTATTT TTTCAATCGCA GAAA GCTTGGCTCATCTCCGTTGGTTG  
AG TTTAATGTTTCTGTCAGGGATTATTC TTTCTCCAGTCATTT TTTCACTTCCACTGGAAGCCTCTACTC

TATTGTCTATAATAGTATCGGGTATTGCTTTTATTATTATTTTATCTATAGGACGCCTATAGTCTAACC TTG  
GGAGAAGTATTTGCTTCGTTATCTAA TTTCTTGTTCGTGATCTCGTTGTTCCGATTCTGATAGATAGAGCC  
CTTCTCGAATATGGGAAAAAGCGG TTTCTATAGTTTCATCAAAAAGGTGT TTTCTGTAAGCTGGATTTT TTT  
AGTTAA CAAA GAAGGT TTTGCTTGTGTCAATACAGCAAATTTAAA TCT TTTAGAAA ACCCTGAAGGGAGA  
ATCTCGCTTTTGAATAAA GTTACAGACCTTTTA CAGAAGGTGCGCCCGATTTA TAGGTTCTA CAAA GAG  
CTAGGGATTCGAAA TAACAGCTCGCTGCAATTCTCTGTGCT TTTGGCTGCAAGCT TTTGTTCTTTCCA  
TGC CAAA CGAAGCAG TAAAGCAATTGGAAGTAACGA TAAAATTCTTGGGAAGAATGAATGGAAGAAA GATC  
TCTGAAAGAAA GACTACATTGTCAATACAGCACAGTACACCACCTATGCA CAAA GC TAAAAAAGCTCCTA  
CCGCTGCAAGCATAG CAAA AAAGACTAGAGGGACGCTCCTGACTTCATGAGTGCGAA TTTACCCCTGTAA  
AGAGAGCT TTTCTCTCTT GAAA GCTTATGTAATTGCTGATCA TAAA GAGGACGTGCTGCCTGTACAAGT  
TTTTAAA GGAGGTATCGT CAAA CTAGGTGGTCTTCA TTTGCTGCAATAACCCAGCGATTCTTGTTC TTT  
ATTTAAGGCAATTGAATGGAG TTTCTGATTCTTGATCGC GAAA AAGGCTTCCCCA ACTCC CAAA CAATCT  
TGCACATCATGCGAAGCTAGTATGATCGCT TTTCTTCTTT TTTGCTAATCT TTTACATCTTGGTATA  
AAATTTCTTTCTGTAATGGGATC CAAA GACGTGAAA GGCTCATCTAACAG CAAA ATAGGC TTTG GAGATAA  
GC TTTG CATAG CAAA CACAACACGTTGACGCTGTCC TCCAGATAATTCATCTG GAAA TCGATCTAACAA  
GAAGATAGCCC GAAA GAATGCACAACATTGTAGAAA CATTCTTCTTCAATAGTTGT TTTCTGT TTTGCGCG  
ATCCTA ACTCCGTTAACAA TAAA ATATTT TTTCTAACGGTGCGCCAGGGTAA CAAAGCTTCTCT TTTGCTG  
CATGTAGGCTATCTGCTCCTGCTGTATAGGTTGCC TTTCCAGAGAA TTTCTCC TAAA GAACAAGAGAGA  
AGACCTACTATGATCC TAAA TAATGTAGTCTTACCAC TTTCCAGAAGCCCCAGA ACCATA GAAA TCTGAC  
CAGAAG CAAA GCCAGCTGATGCATCTT CAAA AACAGAGTGCATGATGAGAATAATACAGAGAT TTTAC  
GTCTAGCATGG GAAA ACACGAAC GAAA TAAGAAA TA TTTCTGGACTTGCGGTTACCAAGACTTGAAC TTG  
GGACCTCGACATTATCAGTGTGCGCTCTAACCAACTGAGCTATAACCGCAGGGATGGAGACTAGGAGAT  
TCGAACTCCTGACCTTCTGAATG CAAA TCAGATGCTCTACCAACTAAGCTAAGTCCCCTTGAGAGCGGCT  
GTTACCGAAGATTCTCAGTAA CAAA GCGCTATCTTAATCCAAGAGCGAT TTTAAGCACAAGAAA AGATTA  
TCAAAA AATGGATTT TTTCTGTGCGAAA GAAAAAATCTATAAAA GATACACGCT TTTCTTATGTCCATTTTT  
TTGGAG TTTCTGCACCTTAGTGACT TTTGAAA GATTGAA TAAAGGTGCTGTATTCTTATCTAAA ATTTCTG  
GGAACTCCCTTATACACCAT GAAA ACTTGGTACAGCGTGTGATTAACAGAGACAAGCATTCTCGAAA  
ATACACATCGTCGCATGCGATC CAAA ATTC CAAA GC TTTGTGTCTTGTAGAGCTGTTGCTTTAAGATAT  
AGA ACTTGC GATT CAGGAAGTGC GTATAACATTCTCTG CAAA ACTTCTTGAAGTTCAATTCCGGTCTAC  
TGATATCAAT TTTCTCTGGATATTCC CAAA CAGACACTACATAAAA CTGTGCTATCACTAGGAG TTTCTGC  
TACATAGGTATCGTAACGAATAGC CAAATCTGATTGAGGGACTCTATCACTTGTCCGAATGTTCCGGGA  
GACTCAG GAAA TTGGATAG CAAA ACCGC TTTCTGTGTGTAATCATAACGCTTCCAAGACAAGAGATCCG  
AAA CCT TTTCTGATAGCAGGG TTTGAGATTCTCTGTGGTAGAGAGAATAGTCTTGTCC TTTAAGATCCA  
GGACTTCATCTCCC TAAA AACCTGAGGTTCTCTTCA GAAA AAGCTTCTGAAGGAGC CAAA GTATTA  
AT TAAA AGGATAGCAGATAAAGAAA G TTTG CAGAAC TTTGAAA GCATAATAATTA TAAA ATATAAAA AGCT  
TTTCTGTTAC TTTATGATAACCTCGCATGAGGTTT TTTGTTATAA GAAA AATAG TAAA TAAA ATCA TAAA  
CATACACTCTAGATA TTTACAAGCTTCTCATAGGCTCTCTCGTTCTTATATTCGACACCTTCCGCGT  
TTCAATTCGT GAAA AATAAT CAAA TAGATTATCCAATAAGTTAA GAAA GCTAGTAGCTCTGTGAATAATCT  
TGATTGTTAACGATCTCCTTGTAGGATGGCCGGGTTCTGTGTACTAGATCCCTAGTTATATGAATATGT  
TTGGTAAGGGCCTACTGTATAAGAAGT TTTGCTTCTTAGGTGGGACGTCATTAATGGGGGTGCGATG TTT  
GCGT TTTAACCAG CAAA AAAGTCCGCACTTCTCCCCTCTAGATGGGGAAGCTCCCCTTCCCTG GAAAAC  
CTCTAG CAAA AATTC TAGG GAAA ACCCTTGTT CAAA GATCCTAT GAAA ATGCCTTAAGCAGTCAATCTCT  
AGATTGTGTTGTTGTGGCAACAGATGATCAACGAATT TTTG ACCATGTTGTTGAA TTTGGGGGCTCTGT  
GTCATGACTAGCACATCTTGCCTAACGGA ACTGAGCGAGTAGAAGAGGTTGTGTCTCGACAT TTTCTC  
AAGCAGAGATTGTTGTGAACATCCAAGGAGACGAGCCCTG TTTA TCTCCTACCGTCATAGATGGGCTTGT  
GAGCAGCTAGAGAACAATCCTGCTGCAGATATGGTCACACCTGTTACA GAAA CAACAGACCCCGAAGCG  
ATATTGACAGATCA CAAAGTGAAGTGTGT TTTCTGATAAGAATGG CAAAGCTCTTTAC TTTAGCAGAAGCG  
CTATTCCTCACAAC TTTAAA CATCCAACACCTA TTTA TCTGCATATTGGTG TTTATGCT TTTAGAAA AGC  
T TTTCTAAGTGAATATGT TAAA ATTCCTCCTTCTCGTTAAGCCTAGCCGAAGATCTTGAACAAT TACGA  
GTATTA GAAA CAGGTCGTTCTATCTACGTT CATGTTGTT CAGAATGCAACGGGCCCTTCTGTTGATTATC  
CCGAAGATATAAC CAAA GTGGAGCAGTA TTTA TTATGTC TTTCAAA AGCATCTT TTTG ACTGGAGGCGTA  
G TTTCTTCT TTTAGG TAAA GGACTTACCGCAGCCTCTCTAGCTCTTCTACTAGAGAGACAAGACTT GAAA G  
TTGCCATGCTCAAGTTGGACCCCTA TTTAAA CGTAGATCCAGGGACCATGAATCCTTATGAGCATGGAGA

AGTATACGTGACCGACGATGGCGTA**GAAA**CTGATCTCGATCTTGGCCATTATCATCGCT**TTTC**TTCTGTGA  
CAACTGTC**TAAA**TACTCCATCGCCACTTCTGGA**CAAATTTA**TACTAAGGTGCTCACTAAGGAACGTAATG  
GGGAA**TTTC**TTGGCAGTACAGTTT**CAGGTTATCCCTCACGTA**ACTAATGAGATTATTAATGTCATTCATC  
GTGCGCAGATCACCATAAGCCTGATATCCTTATTGTG**GAAAT**CGGAGGGACAAT**TGGAGATATAGAATCG**  
CTACCT**TTTC**TAGAAGCTGTACGACAAT**TCCGCTGCGAACATCCTCAGGATTGCC**TTAGCATT**CACATGA**  
CATATGTCCTTATCTAAGAGCTG**CAAAA****GAAAT****TAAAAC****CAAA**CCTACTCAACAT**TCCGTACAGA**ACTT  
GCGCAGCATTGGAA**TTTC**TCCTGATGTAAT**TTTG**TGCCGTTCTGAAGCTCCACTTAGCAGCGAA**G****TAAAA**  
**AGAAA**AATCAGCCTGT**TTTG**TAAATGTGCCAGAACATGCAGTT**TTTA**ACGCGATAGACTTAGAGCGCTCCA  
**TTTAC****GAAA**TGCCCTTGTATTGGC**TAAAGAAA**ATATCTCAGACTTCTTGT**TAAATAAA**CTTGGT**TTTC**  
ACC**TAAA**CC**TTTG**GATC**TTTC**CAGATTGGCAAGATCTTGTGGAGGC**TTTAT**GTGATAAGGAGCGCCAACAT  
GTTTCGATAGGGCTTGT**TGGAAA**ATACCTAGAACA**TAAAG**ACGCATA**TAAA**TCTGTATT**CGAAGCTCTTT**  
**TC**ATGCGTCTGTGCCAG**CAAA**CTGCTC**TTTG**GAAC**TGTT**CCTATTGCTCCTGAATCAGAAGATCT**TTT**  
**AGAACA**ACTGTCTCAGTGCATGGATG**TTTA**AT**TCC**TGGAGGT**TTTG**GCACAAGAAGTTGGGAAG**G****GAAA**  
ATCTCAGCAGCTCGTTATTGCCGAGAACAGAATATCCCTG**TTTC**GGAATCTG**TTTA**AGGAATGCAGGCT**TT**  
**TAGTAG**TCGAATATGCA**GAAA**TGT**TTTG**GAC**CAAA**CCTCTTGCCAATTCTATG**GAAA**TGAATCCAGAGAC  
TCCAGATCCAGTCGCTGCATGATGGAAGGACAAGATTCTGTCTG**TAAA**GGGGGCAC**TATGAGAT**TAGGA  
GCTTATCCTTGCCGAATTGCTCCCGGATC**TTTA**GCCTCTGCTGCTTATAAGACGGATCTTGTACAAGAAC  
GTCACCGCCATCGATATGAAG**TAAA**TCCTTCTTATATAGAACG**TTTA**GAAGAACATGGAT**TAAAA**AATAGC  
TGGGGTCTGTCC**TTTAG**GAGAGCT**TTTG**C**GAAA**TTGTT**GAAA**TCCCAATCATAGATGGATGCTTGGCGTA  
CAG**TTTC**ATCCTGAATT**TTTAT****CAAA**ATTAGCTAAGCCTCATCCACTA**TTTA**TAGAATTCATT**CGCGCTG**  
C**TAAA**GCCTATTC**TTTG**GAG**AAA**GCGAATCATGAACATCGCTAAGCAACAACAAGCTTT**TTTA**GGGATCG  
ATTATGG**GAAA**AAACGTATTGGCCTAGCT**TTTG**CCAGTCCCTCTTCTGATCCC**TTTG**CCTATAGGGAA  
TGTAGAAGCCCGTTCCTCTCTTAC**TTTG**ACAGCTCAAGCGCTCGTCTCTATTAT**CAA**AGAGCGTGCTGTT  
ACGACAGTAGT**TTTC**GGAATCCATTACCTATG**CAAAA**AAGCTTATGCTTCAAGCGTGAATCAG**GAAA**TTT  
AAGAAC**TAGCC**CACTCATCCA**GAAA**TGACTGCTATAGAAGTCATTC**TTTG**GGATGAGCGGCTATCTTC  
AGCACAAGCAGAACGCATGT**TAAAA**AAGCGATTGTGGCTTAATC**GAAA**ACAGCG**GAAA**AATTCCTCGGAT  
AGTCTAGCTGCCAC**TTTA**ATCCT**TTTC**TAGCTT**TTTA**GATTCTC**GAAA**ACTATACTAGGACCCCTCATGGC  
**AAAG**CCATGTT**TTTA**TGAGAGAG**GAAA**TCCTT**TTTA**GGCACATATT**CGTTTT****TTTG**GTATTGTGGCTCTCTC  
T**TAAA**AAATTAACACTCTATACTAGGTTGTACCTTGGAA**GAAA**T**TAAAG**ACT**TTTG**GCCCCACATTACCAG  
CCTGCCCTCCCTGTATCGTGTTATT**TTTG**GTGCTACAGGAGACTTGACCTCTAGGAAGCTC**TTTC**CTGC  
**TTTA**TACAAT**TTTA**C**AAAG**GAAGGACGTCTATCC**GAAA**ACT**TTTG**TTTGTGTTGGG**TTTG**CTAGGCGACCT  
AAGTCTCATGAGCAAT**TTTC**CGGA**GAAA**TGAAGCTTGCCGTT**CAGCA****TTTC**TCTCACTCATCG**GAAA**TAG  
ATATTCGAG**TTTG**G**GAA**AGTCTG**GAAA**ATAGAATCT**TTTACC**CAAGCTAAT**TTTC**TGATGCCGAAGG  
CTACTCTGCTCT**GAAAG**CTTAT**TTTG**GAGCAACTAGATCAACAATATGGAACACAAGGGAATCGCTTT**TT**  
**TATTTA**TCAACACCACCAGATTAT**TTTC**CAG**GAAA**TCATCCGCAAT**TTTAAAT**CGGCATCAGCTATTCTATC  
ATGAACAAGGAGCACAACAGCCTTGGTCTCGGCTAATTATA**GAAA**AGCCT**TTTG**GAGTTAA**TTTAGAAAC**  
AGCTCGAGAGCTTCAACAATGCATTGATGCCAATATTGATGAAGAGTCGG**TTTA**T**CGAAT**TAGACCATTAT  
**TTAG****GAAA****GAAA**CGGTT**CAAAA**ACATCTGACTATT**CGTTTG**CTAATACTCTC**TTTG**AGTCTTGCTGGA  
ATTCTCAGTACATAGATCATGTG**CAAA**TCAGCGTTAGCGAATCAAT**TGGT**ATAGGATCTCGAGGGAA**TTT**  
**CTTC****GAAA**AGTCGGGCATGCTACGAGACATGGTACAGAATCA**TTTG**ACGCAGCTGCTATGTCTACTGACT  
ATGGAACCTCCTTCTGAAT**TTTC**TTCCGA**GAAA**T**AAAAAA****GAAA**AAAT**TAAA**ATTC**TAAAGAAA**ATTC  
TTCCATCCGCGAAGAAGATGCTGTT**CGTGG**CAATATGGTGAAGGGATTGTGCAAGATGTT**CAG**TTCT  
GGGCTATCGGGAGGAA**GAAA**ATGTCGATCCGAATCTT**CAGTA****GAAA**CCTACGTTGCAT**TAAAA**TTAT**TT**  
**ATCG**ACAATCCTCGCTG**GAAAG**GGGTTCCCT**TTTA**CTTACAAGCAGG**GAAA**CGCTTCC**TAAA**AGAACAA  
CAGATATCGCTGTGATC**TTTAAA**AAATCCAGCTACAA**TTTA**TTCAATGCAGAGAAT**TGTCC****TTTG**TGTC  
GTTA**GAAA**ATGAT**TTTA**CTTATTATTCGATTCAACCGGATGAAGGTGTTGCGCTACAA**TTTA**ACTGCAAG  
GTTCCAGGA**CAAA**TAAGCTCGTACGTCCTG**TAAA**AATGGACTTCCGTTACGACAGCTAT**TTTA**A**ACTG**  
TTACTCCCGAAGCTTATGAACGGT**ACTGTG**CGACTGTATCCTTGGGGACAGAACGCTAT**TTCACTAG**CAA  
TGAAGAAGTCTTAGCATCTTGGGA**ACTAT****TTTC**TCCTCTATTA**GAAA**AATGGTCTCAAGTACACCCTATA  
TTCCCTAACTATATGGCCGGATC**TTTA**CGTCC**CAAGA**AGCTGATGA**ACTATTATCTAGAGATG****GAAA**AG  
CTTGGCGGCCCTATTAA**TTTGT****TTTG**CAAGAGGTTATATACATGGCTACCCTTATTAGCC**TAAA**TGATGC  
GAATAGAATGCTTATCGCTGACTCTCAAGAAGAGTT**TTTACAAA**TCGCATGTTATGATTGGATCTCTACA  
G**CAAA**T**AAAG**CGGATTC**CAAA**CGCGGTGCATTCTATGTCGCTC**TTTC**TGGAG**GAAA**A**ACTCC****TTTG****CAAA**

TTTTC CAAGAAA TTGTGAAGAAGCGCGGGCTA TTTTCAGACTGTTC TAAAAATTGTGGTATTTTGGGGAGA  
TGAGCGCG CAAACGAAGATGTGGAAGCTGGAAGTAACATCT TAAAAGGCTATGGATATCT TAAAAGGATTG  
CGCATTCAGAAGAT CAAATC TTTTCGTATGGATACCGCAGATCC CAAAAGGGGATGAGGCTTATGAAGCGT  
TGATTCAGAAGTATGTTCCAGATGCTATT TTTGATATGGTAATGCTTGGAGTTGGTGAAGATGGTCACAC  
GC TTTTC TCTCTTTTC CAGAAA CACAAGCTCTGGAA GAAA AAGAGCGT TTTGTAGTC TTTAATGAAGTCCCC  
CAATTACATACCCGCCGAATGAC TTTAACATTTTC CGATTGTTGACAAGCGCGGCATCTTGTGGCCTACG  
TTCAAGGTGAGAA TAAA CAAGATCT TTTTCATAAA CTTGTGCACCC TTTAGGTAGGGATACC TTTTC CTAT  
AGAACGAGTAGGAAC TCTC TAAA TCCTGTGCAGTGGGTACTATCTTCTGATAGTTGTA GAAA AACGGAT  
CTAGCAGATATTCCGGCCGATTG TAAA TTAGAGATGTTCTAACTTCTTCTCGATTACGAATAGCCATCT  
GTTGTGCGATT TTTAAA AGACCATAGTTGCAGG CAAA TCCATTCAAGACAAC TTTGGTGCAGAAGAATAGGA  
ATCCAACGCTTGCACAGCAGAGTGATGATAGACAAGACTTCTTC TAAAAGGATAGACTGGCATGGTCTTG  
A TTTTCG TTTTAGGAGATCCGGATATGCAAGTAATGATACTGGCACCTTT TTTGCTAAA GAAA CCGATCCC  
TGAATAGTTGTAGAAGGACCGTTAGCATAGCCTTGGT TTTG TCTCGCAGCACCTG TTTATCTTCATCAGC  
TGTTCT TTTACTTGAGAGCCTATGCGTGTACAGACTCCTTACCCTGTGC TAAA CCAAT CAAA AACCGG  
ATATCCTTT TTTACTAAC TAAAGTCT TTTTCCTCCATAGGAATAT GAAA TGACACACATCTAGATCGAATAG  
TAGGAGGCAGTCTCTGAGG CAAA GCGGATACTAGTA TAAACATACCCTACTGTGGTGGATCCTC TAAAAG  
CTT CAAA AAAGCTGAGATCGCATCTAGTGTATTCTATCGGCCTCA TAAATAATA TAAATTTTATATGGG  
C TTTTCATAAGGATGAATC CAAA ATCC TTTTC TAATTGCACGGGGTGTCTCAATCGTATGAAGACGTCC TT  
TCCCCGTGAGGAGAGTACTCGTGTATGTCTGGATGCAG TTTA TTAGCTAA TTTG TAAGCAGCTTCGGGTAA  
GG TTTCTTTGATAATTAGAGAAGCATATTCATAAGCTCGAGCTGA TAAA TTGGA TAAA TCCTGCCCATGT  
AAA ATGATAGCAGAAGGAAGCTTCTGATCACGCACTCTCTGTATAAGAGCCTCCCAAGCAGCACTCTCCA  
TTACCTCCCCCTGTCTATATCAATGCACGAATCTGTAAGAGAGCTTGGTCAACAGAAGCCTCTGTTGGCA  
AGAGGGCATC TAAA ACCTTGTACCTATCTGGAGCTT TTTCTGC TAAAGCAAGAAA TCCTTCTCTGACAGA  
CTGGTG GAAA ATTTG TGGTT TTTG CT CAAATTTA TCCAGATG TTTCTGACGAGCC TTTCTGATGTAATCCT  
TCTCTTGCTGGGATATCCAATAAGAATATGATGTCTGGCAAGAACGGCTTATCTCCACAACATGATAAC  
ATAAGTTCGTAA CAAA ACTCTCCCCTAAGCCTCCAGCAATTCCTTGATATACAATAGTAGAATCGT GAAA  
ACGATCGCTTATAACCGTCTTCCCAGACTTAAGAGCAGGTATGATCT TTTTCCTGAATGTGTTGTGCACGA  
GCTGC TAAA AACACAACAATCTGCATATGGAGATATTT TTTG TTCTGGATCCAGAAGAAGGCCTCGAA  
CACTGTCTCCAAGAGAGCATCCCCCTGGCTCTCTCGTAGTGACAA TTTCTCTGCCTTCTTCTAT TAAACG  
CTTAGAAA GCGCTTGTATAAA CTGAGT TTTCCAGCACCTTCTCCGCCTTCTACTACAATAAA CACGCTA  
TTCTCTATTGTATCCTGCCAGATTGAACACTTGTGCAAGAT TTTCTTCCG TTTCCACTGATCTGTGA  
TTTATGGATAGTT TTTCCATAGCAACAAGCGTATCTCCTTCTCGAAGATTGACAAGACGAACACCTTGTG  
TGGCTCGTCCCATTACCCGCACATCTTGCATGTTAATTCGGATTGCTTGTCTTGAGCAGACATAAGTAG  
GATACTATCACAATCCGTTACC GAAA TAGCTCCTAATACATCTCCA TTTCTTTGTTAATCACGATTGAA  
CGAACACCAACTTCCGCGATTTGTTTCTCG GAAA TC CAAA CTAGCGAACG TTTCC CAAA TCCATTAT  
CACACAACTAGAACGC TTTGATCTTCAGTTACAAC TTGACAGCTGACTA CAAA ATCTTGTTCATTT TT  
TAGA GAAA CACCTCGCACTCCTCTAGCAGCTCGTCCATTGGACGAACCTTATCATGAGGGAAGCGAACT  
GCCATTCCAAGACGTG TAAATAGCATAAC TTTCTCTTCATCGTTCGCTATATGACGAGCAGCTATAAGCT  
CATCCCATCATCGATCTCGAGAGCTCGTATTCTTT TTTACGAGGGCTGC CAAA GGCATCTAAGGAGAC  
TTTC TTGACAACACCCTTCTTGGTAGC TAAAAAGAGGTATTCTCCTTGCTCGAACCGT TTTACATTAAGC  
ACCGCAGCAACTTGTCTCCGGGACGGATTCTTCCAG GAAA TTAATAATAGG TTTCCCTTTTGCTCTAC  
GTTCTCCTTCAGGAAGCTGCCATAC TTTCAACCAGTAACACTGACCGAAGTTGGTGAAGATCAGTAAGTA  
ATC TTTCTGTGGATGCGGAG TAAA CAGC TTTCAAAA AAGTCGGAACC TTTCTTCATATCGAATCCAGTGACT  
CCTTGCCCGCCGCGTT TTTGTTGCGG GAAA ACTTTA ACTGGCATAACGTTTACATAATCATCCCCA GAAA  
TTGTGATGATTACAGACTCATCT GAAA TAATATCTTCTATGTCCGAACATCTCCTGTGTCCA TTTCAAT  
TTTAGTACGACGAGGCGTCTTATGAAC TTTATGTAATCTTTCAGTTCTTTCACGAATGATATC TTTAACT  
AACTCTTCTTTCAGCTAGAACCTTACGATAATAAGTAATCT TTTCTAACAGCTCGCTATACTCTT TTTGTA  
C TTTATCTGCTTC TAAA CCGGTGAGTTGGTACAATCGCAATTCAAGAATAGCTAATGCTTGTGCTTCT GA  
AAAAC TAAA TAGTTCAACCAGCTGTGT TTTGCGTGTTC TTTATTTG AAC TTTCTCGAATGGTT TTTACT  
ACTTCGTCCATACAA GAAA GTGCT TTTAAGAAGCCTTCTAGTATATGCGCACGAGCTTCCGC TTTATTTA  
ACTCATAACGAGTTCTTCTTCGGATAACGTCCATACGATGACGAATCCAAGCA GAAA TCATTCTATGAAT  
ATTCATAGTGCGCGGAAGATT TTTA TCTAGAGCCAACATATTAGCTC CAAA TGTACCTGCACATCTGTG  
AATTTA TACAGACGATTGATAACAAC TTCAGAGGATTCTCCTTT TTTCAGCTCCAGCACAACACGAATCC

CGTC TTTGTCAGACTCATCGCGGACATCCGATATTCCTGTTAAGGTCT TTTCGTTGATTAAC TCCGCTAT  
CTGCTCAATTAATCGTGA TTTATTTA CGTTGTAAGGCATCTCTGTGAGAATAATAT TTTC TCGTTGCTTG  
TCCGAGTTCTCCTCTACGTGCATACGAGCGCG CAAA CGTAAC TTTC CTCTTCCGTATAATAGGTAGAAC  
GAATCCCTTCTGTACCA CAAA TAATCCCTCCTGTAGG GAAATCTGGGCCAGGCATTACCTC CAAA ATATC  
TTCAATAGAGG TTTG ACTGTTAGC CAAA ACTAATAGCGTAGCCTCAATTAATTCCCC TAAA TTATGCGGT  
GGAATA TTTG TTGCCATCCCTACCGCGATGCCTGAGGAGCCATTA CAAAG TAAA TTAGGGAAT TTTG AAG  
GAAA AACTACAGGTT CATA TTTAG TTTC ATCGTAGTTAGGGACCATATCTACAGTATC TTTA TCTAGGTC  
CTCTAA CAAA AAGATAGCGCTGTGAGTCAGGCGAGCCTCTGTATATCGCATGGCAGCAGCTGGATCCCCG  
TCGATGGATC CAAA ATTCCCTTGACCATCAACAAGAGGGTATCGCATGGCCCAATCCTGTGCCATCCTTA  
C TAAA GTAGGAT TAAA TGACAC TTTC TCCATGGGGGTGATAATCTCCGGAAGTATCACC G CAAA TT TTTGC  
GCAT TTTC TGTGC TTTA CTCTGGAGTCAGAT TTTA ATTG TTTC ATAGCGTA TAAA ATACGTGCTGAGAA  
GGT TTTA ATCCGTCCCTAGCATCAGG CAAAG CCGCG GAAATAATTACCGACATGGAATAACGAAGGTAGC  
TCTCCTTCA TTTC CTCTTCAAGATT TTTAGGGACGATGAT TTTC TTC TTTATTTA GCATGGTAGTTCTGT  
TCC TAAA ATATC TAAA TTATTCATCCGAATGGA TAAA GCGTGA CTCTTAATGAACTCACGTCTTGAGGTA  
CCTCTTCTCCCATTAACATTG TAAA GATATGGTCTGCTTTCGACCGCATCC TTTAAA GAGACTCTAACGAG  
AGTCC TTTG CTGAGGATTCATTGTTGTATCCACAAC TGATCTGCATTTCATCTCTCCAAGACC TTTA TAC  
CGTTGAATCTCAATTCCT TTTC TTCCAAGGCCT TTTA AGTAGTCTATTACCTC TTTC AAGGTGTA CAAA  
CATACGGAGATAT TTTC GGATCTTCTGTAGAAA CTGTAATACCAGATCCT TTTG GATGGAGGTAAT TCCG  
GATATCGTAACCGTAATCACC TAAA TCGCGCTGAAGTTCTTCGAGAACAGAACC TTTA TATAACTC TAAA  
ATCCGCGAAGCAGATTCTTCATTGGCAGCAATAGCTGCTTCTCTTTCATGAGAATAGAGATAACTGC  
CTCCCTGCTTCCCAC TTTC TGGAGGATAGTAATA CAAAG GATAAAGCTCCGTCTCGGAACATATCCAAGAA  
TTCAGAAA ATGGAATCGCTTT TTTC TC TAAAGAAA CAATAAA AC TTTC GACCTCTAGAATAAGATTAACG  
AACG TTTC CAAA GCTTCCCCTCTCAGATCCCTTAAGGTGTCAT CAAA AACTATCTGGC TTTC TTTG TTC  
CTAAGTT CAG CAAA TAGCCATCCATCTCTTT TTTC TGAGAGAATGTAACG GAAA TCTTT TTTC TTGCTCAC  
TCGATA TAAAGGAGTTGCGCAATATAGACGCATTTCAT TTTC TAT CAAAG CCGGACATATGTCTATAGAAG  
AATGTTAGCAACAAGGTT CGAATATGAGAACCGTCCACGT CAGCATCTGT CATAATAATAATACG TTTAT  
AACGCAAT TTTG CTGAGGTT GAAAT TATCCTTCCCAATTC CACATCC TAAAGCTGCTATAATGCTTCCAAT  
TTCTCTGGT TTTG GAAA ACTTTTTGTAAACGAGCT TTTC TCAACATTCAGGATCTTACCACGAATAGGAAGA  
ATTGCTT GAAA AC GACGATCTCGTCCCTGCTTAGCTGAACCTCCCGCAGAGTCTCCTTCCACAATATACA  
TTTC ACATTTTTC AGGATCTTTTTC CAAGCAGTCAATTAACCTTACCTGGTAAGCGAGCGCTATC TAAAGC  
ACTTTTTC GAAA AGTTAGCTCTCTAGCTCTCTTAGCAGCTTCTCTAGCTTGGGCTGCAACGAACACCTTG  
TCTACAATCGT TTTA GCAATTTGAGGAT TTTC TT CAAA AATGTGGTTAACACCTCACCCTAA TTTGCT  
GAGAAA CCGATCCGACATCACTA TTTC CAAGTT TTTG TTTGTTG C CTT CAAA CTGAGGATGGGCAC  
TTTAACG GAAA CAATTTGCTACTAGCCCTC TTTG ATGTCTTCTCCAGT CAAAGACA ACTTGTCACT TTTA  
GATAGATTATGAGC TTTA ATATAGGAG TTTA CTGCCCGAGTAAGAGCCGTAGAAA ATCCTGTTAAA TGAG  
TTCCGCCTTGCTTGTAGGAATAT TATTAGCGTAAGAATAGATTAATTCGGAGTAACCAGAATTCCTACTG  
TAAA GCAGCCT CAAA TTCTATATCCCATCATCTCCAGGTCTCGATCCCTGAATA TAAA TAGGATTTGGG  
AAAAGAA TTTCTTTA TTTG GTTGAGGTA ACTGACGAATGATTGAATTCGCGCTTCATAGAA GAAAACGA  
CTTTAT CAAATCCCGTATCACGGTCATCTT CAAA AACAAATCGTGGCTCCACGA TTTAAA AATGCTAATTC  
TCG CAAA CGCTTCAT TAAA ATCGCGCGAT CAAA AACGCACGTAGAGAATATAGCTGGATCTGGA TAAAAG  
AGAACTTCTGTACCTCG TTTG TCTGTAGGACCAAGCACCTG TAAA GTCGTTAACGGAGCGCCTCTT GAAA  
ACTCCATGCTATACGCTTGTCCATC TTTA AATACT TTTG CAATGAATT TTTC GGACAGAGCATTAACGCA  
C GAAA CTCCTACTCCATGCAAGCCTCCAGAAA CCTTATAACTGTC TTTAT CAAATTTACCTCCCGCATGT  
AGTACGGTAAGAACCACCTC TAAA GCG GAAATTTG CCGTCTTGGCTTGGCAGATTCTT TTTC GTGAATCT  
GAATAGGGATTCTCGACCGTTATCC GAAATAGAAA TACCTCCGTCTTCCAATATGCGAACCAACGACCTC  
GGTA CAAA AACCCGCCATTGCCTCATCGATACTGTTATCCACCATTCA TAAA CCAAGTGATGCAATCCG  
GTA ACTCCTGTATACCAATGTACATTC CAGGACGCTCACGAACAGCTT GCAATCCTTC TAAAACGGTGA  
TGGCTGATGCGTCGTA TTTCT TTTC TTGTGCGTCCATAACTATCCTAA TAAA AAGCGTATCTC TTTA ACT  
TTGGCACC GGAACTGCTGAATGAATTCGGGATATCAACTCTT TTTGAGAGCT TTTG TTTA ATACAGCAT  
ATAACGAAGCATTGCGGAC TTTA ATCGA TAAA ATTCGCTCCTTAAGCCCTATAGCCTGAGTCATCCCATT  
ATACTTC TTTC CTAGAA TTTCA TACCACGCCTCTATGACCTCTTGTGGCTTGGCCGCAAGAATT TTTCGC  
AAA TGAGACAAA TGGTCTCGGAGAAA ATGTTTTC CATGCTTAATGGGAGAATCTGTTCCGACTTGGT TTTC  
TACGAC GAAA ACTAGGTAGAT TTTGAGGAT TAAA AAGACACAACGCTCCTTCGATATGCGCAAGCACACCT



TCCTTCGCAGAAGGCTCAGGAAGAAGGCTCTTATACTTGTGCGAAC TAAAAAAGTCAAAGTATTAGCGC  
TAAGTTCTAGTAAA TCCTTGATTCT TAAAATGGGTAGTTAACTGATTAACAATCATTG GAAAC TAAATC  
ATTAATCGACTCACTTTTAGATGTCTTAGG CAAAAC TTTACAACA GAAACCATC TAAACGAACCACCTCA  
CCTC TTTGTCCTAGAA TAAATAATTCATCC CAAA CGCGAACAAA ATTTTGATCCGTATCGATTCTTCTT  
CTAACAGCAGTTCTCCATTACGGCCTAT TTTACCAGC TTTGACTAGTTCAACTACATGGCTGCCACAGC  
GATGTA TTTAGGAACATGACTAAGATC TAAATC TTTC TGCAGAATGACTGGACGCTCTTGTGGACTTCC  
TCCGACCAGACAAGGGAATCCCTGGCTCACAAGTATAAGAAGCTTCTTCAATAAGAGGAGTCGCCCTGCT  
CTTCTTGATAACAGGTTCT TTTAAA CAGATCCTGT TTTGTTAGAATCACGTATT TTTC CCTGCTGCTTCG  
GATGTGA CAAAATTC TAAACAGCTAATAGAAGCCGGTGGCTAATACAACCCACCAA GAAACAAA GCT  
CC CAAACAAACAGAAA AAGCTCCACCAACAGCTGCAGCACACGCTCCAACAATAGC CAAA ACTGTGCCCA  
GCA CAAATAAA GCTAACGAGACCTC TTTACTACCTTGAATTATACTGGGTATTTCGGTTCGAATTGTCCA  
AGACAATGTATTCTGTGAAGCTTCTTGTCCAACCGATTGCACAAA CTCCTCC TTTC TTGTTTT TTTGAGA  
T CAAA CAAGTAGACGGC GAAAGAG TTTATAC TAAA CCCGAT TAAAAACA CAAA AAGAATCTCATAATCGCG  
CCGT TTTA TATACGGTCA TTTAAA ATCCCTCTCGAA TTTC TCGCATGACTT TTTG CATATGATGCATGT  
TGTGAATGGACGCC CAGATACCCGCA TTTGGCTCATGTACT TTTAAACAAATGTCTTAAAGTAGGCGCGCT  
TATGCC TTGAGAGCATGCAAGACATGAACACCCAGGCTCTATAGGA TTTAGGTCAGAAGAGTACCGTTGA  
TTATTAATT TTTA GAGGGCCTTGTGATGT CAAAATCATGCCATGTCGCGCAGC TTTA GTCGGATAAGAGC  
TAT CAAAAGAATCTATTCCGAAACCAACAGTGGCC CAAATAGAGGG CAAATCTCCTATCCCTAGCAGATG  
TCTAGGTC TTTC TGCT GAAAGAT TTTG CAGCGGTAACGCCACCACCTCTACGATATCTTGAAGATT TTTC  
CC CAAA CTGCCTCCAATAGCAGAGCCATC GAAAAG CAAATCTTCTACGAATTTA CAGCCAAGT TTCTTT  
GATCAGG GAAA GTCCCCCATGAATGACTCCGTACATGGACTGAATTCAGGATTT TTTAAA TGATAATC  
CAAA GAACGTTTC TCC CAAACGTAAGTGCCTGAGATGACTGGT GAAAATATGTGGGATCTGCAT GAAAG  
GGCAGCAGCTCATC TAAAGGAAGAATGATATCAGCGCC CAAATC TTTC TGCCTTGTACAGAAA TTTCTG  
GAGAAA GAAATAGCTTACGGCCATCTCGGTAGGA TTTAAAGTGTACCCCGTCATCATTAAC TTTAATGAT  
GGTG TTTC CTCTTT TTTC TTCCCGCAACT TTTA ATCTCTTACGCTACAGAACCATATGCCAAGC TAAAA  
ATTTGAAATCCCCCGGAATCTGTAATAATAGGCGCATTCGACCAA TAAATTTGGTGAATCCACCCATAG  
CAGCAATAGCTTCTGCTCCCGGATGCACTATCAGATGATAGGTATTG CAAAACATTAGCGGGATATTGCT  
ATGATC TAAACTCCT TTTAGAGCTCCA TTTG TAGCCACAGGAA CAAAAGCCGGTGTATCAATATACCCA  
TGCGCCGTCTCTATCCGACCTACTCTAGCCCTAGATTTT TTTGATTGATGCAGAATCT CAAAACG TAAAG  
CC CAAA TCCACTCC TTTATCTAAGCGAATTC TAAA AAAATAA TAAA ATTCATAAAA TCATTCTAAA GAGA  
GGGGGAGAAAAGACATAGT GAAA AAAGCCCGAAGAAA ACC TTTG TCTTCGGACTCACCCACTATTGAAA  
AATAAA ACATTTA GAGTGCCGGTATCAATAGGAAGATGACCATCGACAGATATCGTTAAGAGCTGTAA  
CAATCGGACCAGAAGC TAAAGCCGGATCAACGCCGATT TTTG CAAA GAAGAAA GGA GAAAGAACCCTAG  
AGTAGTAGCAGTTAACGAAGCACCGAGTATCCCCACA GAAACGGTAACCCCTAACTGGACTCCTCCCGTA  
G CAAA CAACCAAGTCCCAAGCATCCCATACAACAGACAAC TAGACCA CAAA GAATCCC TAAAGCAACCC  
CTGTTAACAATCCAATGCTCAT TTTCTTTAAGAATGGTCTCTCTTCTTCTAC CAAA GAAAGCGTTCCTGT  
TGCCATACTACGAACAAGAATCGTGTGCACTGCCTCCACG TTTC CC GAAA GACCATTAC TAAAGGA  
ATGAA GAAA ATGACCATGGC TAAA AGAGTAGGGCAATTT TTTGAAA ATATGCCATTACCGAAGCGCTGA  
CAAGTCCCGCACATAAGGTAATAAGTAACCAAGGTGCCCGCAATAAGAATCGTTGCACAACATGGCAGTC  
GTGATATCCAACATCTTCTGTGCTCCCGCCATTTAGCAATTG TTTC GTCTGCGATATCTTCTATTGTT  
TCAACCACATCTTCATATGTGATAGCCCCTAT CAAA AAGTTTTC TTTCGTCCACTACAGG TAAAACAGCGA  
CTTTA TACCGCTCCACAAGGTCCACAACCTTCTCTCTAGTTGTATCAGCTAATAACCTTATGTTCTATAGG  
ACGCATGATTTGCT TTTAAGGGCA TTTC TGCGAAGCAATAAT TAAA CTCTATCTGTTA CAAA ACCCTGC  
AACTCCC TTTAAA GTCTAAGA CAAA AACTAGTCGGGT CAAA TCAATGCCAGGATTATTGCGTATGCAGG  
TGGCAACTCTTTA ACGGTTGTTTC CAT TAAAAAGG CAAAAAATCATTGGTCATGAGTCGCCAGCTGT  
ATTCTTCCATGCT TTTGTAAA TCACGAATCTTTAAGGC TTTC TTAACGTCGAT TAAATC TAAA ATTCTT  
CGATATCTTCGGTCAGGAATATCATCAAGAACC CAAA TCGCTTCGCTGAGGCA TTTGTTCTATAAGAG  
CG CAAATTTCTCCATCCGATAGATTGCG GAAA ATAGCCCATCGCGAAGCGGAATCCGTATTAATAA TAAA  
AGCAATCTTGGAAGCTATACTATCGAGATTCTTA TAAA GAATAGAGCGTGAATCCGAAGGTAGACATGAT  
ACCGCATACGCTAAGTCAATAGGATTATATACACTGACTATTGATGT TAAA TCTTGCGAATGTTCCCTG  
CTGTTAGGGTAT CAAA AGCTTCTTAG TTTAAA ACATAGTTTATCATCTAGATGACTAGT TTTA GAATC  
CATAAGATTTCCGGAAGTTAGCGCAACATCCAAC TTTCTTCG TTTC TATTTTG CTC TTTCACGCCCTTC  
TCCGTTCTTTA TATA TAAA GACTCT TAAA AGTCGCTTATTAGCGACACATTCGGTC TAAA GTCTCGC CAAAT

CTAATACCTCAGACTATCTATTAAGAGATTTT**TTTACGAAAACGACAAA**AAGTCTTCCGAGACTCT**TAAA**  
CAAGAGTCCTTCACTA**TAAAAAGATACTTTACAAA**CAGATACACTTAGGCAGCGACCC**TAAA**TTAT**TTTG**  
TCACTGTAAGCTTCG**TTTC**TTCTGA**CAAATGAAA**ACAAGGAATTAGTCGTCAGACACCCATGCCTCGGAT  
CCTCCGCCTAATCCTCGACTACATGATGAAGAT**TTTA**CTGTAGATCTGCAAG**CAAA**ATCGC**TTTA**CCTGC  
**TAAA**AAC**TTTAGCAGTTTAAAAC****TAAA**AGCTGGCCAACCTTCC**TGGAACAGCCCATA****TAAA**AATGATGC  
CAGATACTCT**TTTAC****TTTC**GGG**GAAA**GATTGTATTGATGGCCGTGCTCCAGAGATGATTACCCCATC**TTTC**  
AGAA**GAAA**CAGTTGTGCCGGCTG**GAAA**CAACCAAG**CAA**ATACCAAGCAT**TTTG**CCCTAACCCGGAGCGCG  
TCCCCCTCCCTCGAACATATAATTTT**TTTCA****CAAAA**AAATCCCC**CAAA**CTCCTCGCGAACGAATCACGTC  
ATTATTC**CAATCTCGTTC****CAAA**CTGGC**TAAA**ACC**ACTCTACCTGA****CAAA**GGAT**TTAG**GCAACCCATATAAG  
TTCGC**TAAA**TAACAGGCTGCTCCG**TAAA**AAGGGCC**TAA**CAGCCTGCA**CAAA**GAGCGAGTCA**TTTC**TC  
GAACGATATCAGAA**CAAACAAA**CC**TTTC**CTC**TTTA**GGGATGTCTGTCTGATAGT**TTTG**ACGCACCATCTG  
GAATAGGATATAGAAGGGAACAAT**GAAA**AAGCG**GAAA**ATATTGTACAGCATCCGC**ACTATG****GAAA**AGATA  
GGTAATAGAATACTGGTAACGACG**CAAA**TAACGGTCCGAGCGTCCATGGGAGGATATGTAT**TAAA**CGGGTG  
CAATCCCTGACCCTGTTCTATC**TAAA**AGC**GAAA**CATCCATATACATATCGGGCTCTTG**GATCGG**CCGGAT  
**AAA**TTCTCCTTCTT**TTTC**CACACAGGATAACCCGCTCC**ATTGCCGAGAGATAAAA**AGGTTGTATCTTCTTC  
CCGT**TAAA**ACATCCAC**TTTAC**CCAGCGATTC**TAAA**AGAATAGCTAGCCCCCTC**CAAATAAAA****TAA**AGG  
GAAGAATCGCTATAG**CAAA**CAT**TTTAG****GAAA**GGTCAGCACTCTTGAATTAGCTAGATAGGCTATCCGACA  
**ACAAA**TCCACCC**TAAA**ACAACAAGAACCCTACAA**CAAA**ACTAATAACACGAGCCGAAGATGGTCGATAA  
GAAGAAGCG**TTTAAA**CTACACCCGGTTATACG**TTTC**TGAGTAGCTCTCCAAGCTGAGCTATTAGG**GAA**AG  
**ATTT**CGGGTCACGGGACGCAATCTAACCTCCG**CAGGAGGGAGATA****TTTAG**AGACATA**GAA**ACCAT**TTTA**AT  
TCTAACCTTC**TAAA**AAT**TTTACT****TTTACAAA**GTGAAGCATTCT**TTTGTCTCAAGTATTAGACTAGAT**  
**TTACTAAT****TAAAAAAA**ACCGT**TTTATTTCTAAGTCGACTAATCAA****GAAATATCA**ACCGCTGG**TTTA**ATAA  
**AACCC**ACTAGTTATAATGCTAT**TTTCATTTCT****TTTG****CAAAA**ACTCTCTACT**TTTAAA**TTAATTTG**GACTTT**  
**AAA**ACC**TTTAT**GGCAACAACAGTTAATCCTAATTACTCTCTTCC**TTTGTGAGAAA**ATGG**TTTC**CTCAG  
CTACGTTAGCTGCTCATTCTTTT**TTTA**ATCATCT**CAAA**CT**TTTG**ATTCCGCTTCTTGTAGGATAT**TTTG**  
CATATTATTAGGAGCTCTAATCTTAACAGGTGTGATTACGACTATACCCTCTATTGCAGCAAGCTAC**TTT**  
**CTTTC**CTCGGGAGTTAC**TTTG**GTTATCGCCGGGGCGGG**TTTA**TGCGCAGCC**TTTAAA**CGCCCTCTCTTCT  
CTGTCACTCAATC**TAA**AGCCTCAACTCTTCTGCATATCTCTTGC**GATTAACGCCTTGCTTGATTA**ACAAT  
CTCATGATACGATCCTCTCCTTC**CAAA**ATG**TTTC**CCTCTTT**TTTA**AGTGTT**CGCTATGTTG**ACTAGGC  
TTAG**GAA**AGTTCTTGCGAT**GAAA**CATCCTGTTCTCTTGTCCAGAACGG**GAAA**ATCTTAG**CAAATAAA**ATTG  
CTTCTCAAGACATTCATGCTTCTTATGGAGGAGTGATCCCTGAATTAGCTTCTCGCGCTCATCT**CAAA**C  
ATTCCAGAACTGCTGACTGCAGCAACG**CAAA**GCGGGGAGTCTC**TTTG**GAAAGATATCGAATTA**TTTC**G  
GTAGCTAATACTCCTGGTCTTATTGGAGCCCTATCTCGGTG**TAAAC****TTTG****CAAA**AGGGTTGGCAAGTG  
GGCT**GAAA**AGACCTCTCATAGGAGTGAACCATGTAGAAGCGC**TTTA**TATGCCGCTTG**GCATGGA**AGCTCC  
CGCCACTCAATTCCTGCTCTAGGGCTTGCTAT**TTTC**TGGTGCC**CATACATCTCTA****TTTCTCAT**GCCTGAT  
GCCACAAC**TTTC**CT**TTTA**ATAG**GAAA**GACTCGAGATGATGCTATTGGCGAGACT**TTTGATAAA**GTAGCTC  
GT**TTTC**TCGGCTTGCTTACCAGGAGGA**CAAAA**AATTAGAAGAATTAGCTCGAGAAGGTGATGCAGATGC  
**ATTTGC**CT**TTTC**TCCAGCTCGAG**TTTC**TGGTTATGAT**TTTC**CT**TTTC**AGTGGAC**TAAA**AACAGCCGTCTTA  
TATGC**TTTAAA**AGGCAACAACAGCTCAG**CAAA**AGCACCT**TTTC**CTGAAGTCTCT**GAAA**CACAG**GAA**C**GAA**  
**ACAT**TGCAGCATCG**TTTCAAAA**AAGCTGTT**TTTA**TGACTATTGCT**CAAAA**ACTTCTGATATTG**TAAA**AGC  
GT**TTTC**TTGCGAGTCT**TTTG**ATTGTTGGTGGGGCGTAG**CAAA**CAACAGTTACTTCCGT**CGCTTGCT****TAAAT**  
**CAAA**TATGCTCTCTTCCGATATACTTCCCTTCTTGCAGTTATGTT**CAGACA**ACGCTGCAATGATAGCTG  
GGTTAGGAGAGAGACTGT**TTTG**CAATCGCACACATG**TTTCTA**AGGAGGTCATTCCATGC**GCAAGATATCA**  
GTGGGAATCTGCTTGCTCCTAGCATTAGCAACTTCTGGATGTT**CAAA**ATCCTCCTCTA**ACGCA**ACCCTC  
GGTCTCCAGCTACTCACACAGTTGCTGTAAGCG**TAAA**AGATGATCCTCGCAC**TTTGAT**CCTCGAGAGGT  
TCGCCTTC**TTTC**TGATATCA**TTTG**ATTCATCATCTCTATGAAGGATTGGTACA**GAA**ACTCCTTCTGGA  
GAAGTCTTCCCTGC**TTTAG**CGGAGAG**TTTC**TTCTTATCCGAAGA**TAAA**AAAACTTATAC**TTTC**AACTT**GAA**  
**AAAA**AGCTT**TTTG**GAGCAATGGAGATCTTATTACCGCTCATGAT**TTTG**TTCGTTCCTGGAATGATGTGTT  
ACAAAATCGTGTGCTAGTAT**TTTA**TTCT**TTTC**GCC**TTTC**TCCCTATTGACGTGAATAAGGATTCTGGATTT  
**TTTG****CAAA**GATGATCATACTCTTGTATCAATCTCCTCACTCCA**ACTCC**ACAT**TTTCTAAA**AGCTGCTTA  
CCCTCCCCGAT**TTTAT**CCTGTGCATTCGCAGCATCAGATATG**GAAA**GAAG**GAAA**AATCTCTTCCGATATC  
TACTGGAGCTTT**TTTC**T**TAAA**AGAGAA**GAAA**GACCGAAGATGGT**TAAA**GCTAGAGAAGAGCCCTTACTAC  
TATAA**TAAA**GACCAGGTAGCTGTACAGGAGATCTGTATACACATCATTCCTGATCAA**CAAA**CTGCTTCTG

C T T T A T T C A A C C A A G G G A A G C T A G A T T G G C A A G G T C T C C C T T G G G G A C A T A G T A T T C C G C A A G A A A C T T T  
A G C C A C A G C A A A C A A A C G A C G A G T C C C C A A T C A T T T G A T A T A T C T G G T A C T T C C T G G C T T A C A T T T A A C  
A C T G C C A A A A A G C C T T T T A G T C A T T C C A A G C T T C G C C A A G C T T T G A G T C T A G T T T T A A A C A A A G A A G C T C  
T T G C C T C C T T G G C T T T T G T T A A A C C T G C A A A C A T C T C C T T C C T G C A C A T T T T G C A C A C C T A C C C A G A G C A  
G C C T C T T A T A A G C A A C A A G A G G C C A T C A C T T T A G C T A A A T C T T T A C T A G A A G A A G C T C T G A C T G A G C T T  
A A C A T G A C T A T T A A G G A T C T A G A G A A A T A T C C T C T T A C C T T T T C G C A A C G T C A C T G T G A A C T C A C A G A  
T A G C T C A G A T G T T G C G C A T C A G T G G C G A A G A A G T T T A G G A A T T A C T T T C C C T A T C T G C G G G A A A G A A T A  
T G C T T T G T T G C A A A A C G A T C T A A T A G G C A A T A C T T T C T T T A T G T C T A T A G G T G G C T G G T T T G C C G A C T T T  
T C T G A C C C T T T A G C G T T T C T T T C C A T T T T C T C C T C G A A A G G A G T C A A A C C T T A T G C T T T A C A A G A T C C T C  
A A T T T G A T C A A C T G A T T C T C T A T A G A A A C G G A A A A A C C C T C A A A A C G C T C A G C T T T A A T T T C C G A  
A G C T T C T C T A T A C A T A G A A A G A C A A A A C G T C A T A G A A C C C C T C T A T C A C G A C G T T T C A T T A T A C A A C A  
A A T A A T A A A C T T T C T T T T G T T A G A C T A C A T C C T T C A G G C C T A G T T G A T A T G C G G T A T G C T A A A A A C T C T T  
A A A A G A T G T T T T A C T C C G T G C G T A G A A A G A T T C T C T C T T T A A A A T G C G G A G A G G T C T T G T C T A G A G A G  
T G T T A A A T T A T C A C T C T T G G C A A A G G C C T T T T A T G T T T T C A A C T T G T T A T C T G T G A T T A G A T C G C A A T A C  
A A T A T A C A A G G A A T C T A C T A T G C T C A G C T A C A T A A A A G A G G C G G C T G T T G T T T A A T T T G C T T T C T T T A T G  
G G T A G T A G T G A C T C T A A C G T T T T T A T T A T T A A G A C G A T C C C C G G A G A T C C T T T T A A T G A T G A A A C G G A  
A A C A T C C T T T C G C C A G A A A C T T T A G C A C T A T T A A A G A A T C G T T A C G G G T T A G A T A A G C C T T T A T T C A C C C  
A G T A T C T T A T C T A T T T T G A A A T G T C T G C T A A C A C T A G A T T T T C G G G A A T C T C T T A T C T A C A A A G A T C G T A C  
T G T G A T C A G T A T T A T T G C T G C C G C T C T T C C A T C T T C C G C T A T T C T T G G A C T T G A A A G C T T G T G T T T A T C C  
C T C T T C G G A G G C A T T A C T C T T G G A A T T C T G G C A G C T T T T C T A T A A A A A A G C T G C G G C C G A A C T A T T T T C T  
T T T C T T C T G T G A T T C A G A T A T C A G T A C C C G C C T T T G T T A T A G G A G C C T T T T A C A A T A T G T T T T G C T A T  
A A A A T A T T C T T G T C T A C C C A T A G C T T G C T G G G G G A A T T T T C T C T C A C A C C T T A T T G C C C T C A A T A G C T T T A  
G C A A T T A C T C C T A T G G C A T T C A T T A C T C A G C T A A C C T A T G C C T C T G T T T C C G C C A A T T T A A A A A A A G A T T  
A C G T C T T A T T A G C T T A C G T A A A G G A C T T T T C C C T T T T A A G G T G T T A A T A A A A C A C A T T T T G C C C T A C G C  
T T T A T T C C C T G T G A T T T C G T A C T C A G C T T T T C T T A T A A C A A C T T T A A T G A C T G G A A C C T T C T C T A T A G A A  
A A C C T T T T C T G C A T C C C C G G T C T T G G A A A T G G T T C A T T T T G C A G T A T A A A C A A A G A G A C T A C C C T A T C A  
C C T T A G G A C T T T C T G T G T T T T A T G G A G C C T T T T C A T G C T A A C T T C A C T T T G T T G C G A C C T T C T G C A A G C  
G T G G A T A G A T C C A C A A A T T C G T T A T T C T T A T G G G A A A G A A C G T T C T A A A T A A T A A T T T A A T A A A G G A T T T  
C T A A A A C A A A C T C A T G T T T C G A T C T A G T T C G T C T C A T A C T T G G C G C T A C A T T C G T A C A A A C A A A A T G C T T  
G T A T T G G G C T G T C T A A C T T T A G C T G T T T T G G T C C T A G C C G C A A C A T T T T C T T C C C T A C C T T T A T C C T G A T T  
A C G A A A G A A C T T T T C C C G A A C A T G C T T T C A G T C C C G A G C A A G G C G T T T C C T T T T G G A A C A G A T A A T T T  
A G G C C G A T G C A T G T T G G C T C G A A C T T T C A A G G C A T C C G G C T C T C T T T G C T C A T C G C A G T C T C T G C T A C A  
A T T A T T G A C G T A T G C T T G G G A C T A C T G T G G T C T A C A C T A G C T C T T G C C A G T G G A A A A A G T G G C A G A T A  
T T A T G A C C C G G A T T A C A G A A A T T T T G T T T T C C A T T C C G C G C A T T C C T G T C A T T A T T C T T T T A T T A G T T A T  
T T T T A A T C A C G G A A T C C T T C C C C T T A T T T T A G C A A T G A C A A T A A C T G G C T G G A T T C C T A T A G C T C G T A T T  
A T T T A T G G T C A G T T T T A C T G T T A G A A A T A A A G A G T T T T G T G T T G T C T G C T C G A G C T T T A C A A G C A T C A A  
C G T T T C A T A T T T T A G A A A A C A T C T C C T T C C A A T T C T C T A G G G C C A A T T A T T T C T A C T T T A A T T T T T A C  
A A T C C C T A A T G C T G T A T A C A C A G A A G C T T T C A T C A G T T T C C T T G G A C T G G G A A T A C A A C C T C C T T A C G C C  
A G T C T G G G G A C T C T T G T A A A A G A A G G C A T T C A T T C T T T A G C T T A C C A T C C T T G G C T C T T C T T T A T A C C T T  
C G T T T T T A T G A T C A T T G T C T C T G T A A G T T T T A A T T G T A T A G G A G A A G G T C T A C A A C C A A A T T G T T A G A  
G G A A A A T A C C C T T G T C T G A A G A T T T A T T A A A A A T T G A C A A T C T A G T C G T C T C C G T A A A A A A T T C C A A T C A  
A C G A T T A G T C A A T C A C T T G T C G C T C A C T A T C A A G C G A T G C C A A A G T A T G G C A C T T G T A G G A G A A A T G G T  
T C G G G G A A A C A A C C G T T T C T A A A G C A G T T T T G G G T T T C T C C C C G A T A A T T G T T A C A T C C A A T C T G G A A  
G A A T C C T T T A C T C C A G C A C A G A T A T T A C A C G C T T A T C T C G T A G A C A A C T T C A A A C A A T C C G C G G G A A G A A  
A A T C G C A A C T A T T T T C A A A A T G C C A T G G G A A C C C T G A C T C C T T C T A T G C G T G T A G G A G C T C A A A T T G T A  
G A A A C C C T A A G A C A T C A T T T C G A T A T G T C T A A A G A A G A G C T T T C T C T A A A G C A A G A G A A C T G C T T G A G A  
G T G T A C A C A T C G A A T C C C C T G A T C G A T G C C T A C A A T T A T A T C C C T T T G A G C T T A G C G G T G G C A T G T G T C A  
A C G A G T T A G C A T T G C T A T T G C T C T G G C A A C C A A T C C G G A A C T C A T T A T T G C A G A T G A A C C T T C A A C A G C G  
C T A G A T T C T A T A T C C C A G G C T C A G G T A T T G C G T G T A C T G A C A C A A A T T C A C A A A A C C A T T C T A C A G C T C  
T A C T A C T C A T C A C T C A T A A T T T A G C T T T A G T A T C T G A A C T G T G T G A A G A A A T G G C C A T T A T A C G C T A T G G  
G G A G A T C G T T G A G C A A G G T C C T G T G C A A G A G C T A C T G C A C T C C G T C T C A T C C T T A T A C C C A G C A A C T G  
A T C C G C G C T A T T C C T A G A A T T C C T A G T C C T A G C T A T C T T T C A C C T A C A G A A C C T C T T G C A A C A A C C G C G T  
A T T A A C C T T T T A A T T A G C T A T G T C T A C G T T A G T T T C T A T T A A A G A T C T T T C T C T T A C T A T T C G C A A A C A A

CCTATTTTGAGAAACGTGCATCTTGAAATATGTGCGAGGAGAATGCCTAACAAATAGTCGGAGCAAGTGGAT  
CTGGGAAACCTCTCTAGCTTTAGCGATTTTGGGATTACTGCCTCCAGATGCTCAAGACTCGATCGATTT  
TCATCTTCCTCCAAAAACTCCAAGAACAAAAGCGGTGCAGATGATTTGGCAAGATGTCTATAGCAGTCTC  
AATCCCATGATGACTATTCAAAGAAATCATTGCCGAACCACTACACATCATGGGGGGTCTTTCTAAAAGCC  
AACAGCAAGAAAGAAATTGCTCATGCATTGAAACTGGTTCATCTTCCAAAATCATTTTATCTTTACGCC  
TAAATAAACTAAGCGGAGGGCAACGGCAACGCATAGCTATAGCAAAAGGCTTTGGTGTGTAAACCGGAATTA  
ATTATCTGCGATGAACCTCTATCCGCATTAGATACTATGAACAAAATTTGATTCTTGATTTATTTCAA  
CGATTAAGAATCAATATAACAATGCTTTTTATTCATCACTCACGATATGTCTGCTGCTTACACTTTAGC  
TGACAAAATAGCTGTTATGGACCGTGGATTTTAGTAAGAAATAGCTTCTAAACAAGAGATCTTTTCTCA  
CCAAAACATAAAAACCTCGTGAGCTTCTTGATGCTATTCCAGCTTTTACTTCTCTTTTGATAATCTA  
TCGTTATCCTGTAGCTCTTTGTAAATGCTTTTTTTTGTCTATAAAAATCTATAATAGCGCTGCACGCTCTCGA  
ACTGTTATCTTTTGGTGTGCAACTTAATGTGGTTTAGATTTCGCTTATCTGCTTAGACTCCGAGCTCCAT  
GGTCTGTTGCTCGCTACGGCCTGCTCGTTTTCTGAGAGTCTTCCCTTCCGTGAAAGGCTTGAAGGTTTGCA  
CTCATATAGAGTTGTTGACAGAAGATTTTGGCATGCTACGACCAGGAAACAATCGATTATTCAAAATC  
TTCAGAACTGGAGTAACTTTGCAGATGAAATCTCCCATATTTTGAAGATCTCGTTTACGACAACGGGG  
TTCTTCCTAGAGAAGCCATAGAAGCTGCGATCGTCAAGCATCACAAAATCACTCCTTATTTACTCAAGAT  
TTTGAAGAAGCTATTGATCATGTGTCTGATATCATTTGATGACGACTGCTATCAAGGCCATCTTTATGCT  
ATGTACCTTTTAGCGCAATTTTCGAGAACTCGTGCTCTTCCGCTCATTATTAAGTTATTCTCTTTTGAGC  
AGGATATCCCTCATGCAATTGCTGGGGATGTGCTTACAGAAGATCTCTCCCGAATCTTAGCCAGTGTG  
TGATGACGTTGCTCTTATCCAAGAACTCATTGAAACCCCTCACGTAAATCCTTATGTGCAAGCCGAGCC  
ATTTCTAGTTTAGTGGCTCTCGTCGGCGTCCACAAGCTTTTCAGAGAAACAGCTATTGCTTATTTTCGGAG  
AATTACTTAATTATCGGCTAGAAAAAAAGCCTTCCTTTGTCTGGGATAGTCTTGTGCTTCCATTTGCGC  
TCTTTATCCAAAAGAACTTTTTTATCCTATTAGCAAAGCTTTTTCAGCTGGTCTGATAGATACATCTTT  
ATCAGTATGGAAGATGTAGAAACCATTATTACGAAGAATCCATTGATTCTTGCTTAAAGAAGTCTTCT  
CCTCCACAGATCTTATCAACGACACTTTTGAAGAGATGGAGAAATGGTTAGAAAGATTTTCTTTTGAGTC  
ATAGTTTTTATCCAGATAAAAATTATAGGGAGCCATGAAATAACAAACGCTTCTTATCGCTCGTACTCT  
TAACAATTTATCCTTCTCGGAATTTTGTCTGCCCGCATTCTGATCTCATCGACTCCAAAGCGTGGCACTT  
ATTTGCGATATTTACTACGACTATTATCGGAATCATTGTACAACCCGCTCCTATGGGAGCCATTGTTATC  
ATGGGCATTTTCTCTTCTGCTTGTGACAAAACATTAACCTAGATCAAGCTTTGTCCGGATTTTCATAGCC  
CTATTGCTTGGCTTGTATTTCTTTTCTTTTCATAGCAAAGGCGTGATAAAACAGGTCTTGGAGAGCG  
AGTTGCTTACTTCTTTGTAAAATAATTTGGTAAAAGTCCTTTAGGATTGAGCTATGGCTTAGTCTTACA  
GACTTTTATTAGCACCGCAATCCCTAGTTTACAGCTCGCGCTGGAGGCATCTTTTCCCTGTCGTTA  
TGGGATTATCAGAGTCTTTTCGGTAGTTCTGTAGAAAAGGCACGAAAACCTCTCGGATCTTTTAAAT  
CAAAAGTAGCTTATCAAAGCTCTGTAATTACAAGTGCTATGTTTAACTGCTATGGCTGGGAACCCATT  
ATTTCTGCCTTAGCAAGTCATTCTGGAGTAACGTTAACATGGGCAAATTTGGGCTAAAGCCGCAATCCTTC  
CAGGGATTATTAGCTTAGCCTGTATGCCTTTGTACTCTTTAAAATATTTCCACCACAAATAACTAGCTG  
TGAAGAAGCTGTAGCAACTGCAAAACCTCGCTTAAAGAAATGGGCCTTTAAAATCAAGGCGAACGCATT  
ATTCTTTAATCTTTTCTCTTTAATATCTTTATGGACTTTTCGGAGATCCATCGGCATCTCAGCAACAA  
CCACAACATTTATAGGACTATCCCTACTCATTCTTACGAATATCTTTGATTGGCAAAAGATGTCTTTTC  
TAACACTACTGCATGGAAACCCTTGTCTGGTTCGGAGCTTTAATTATGATGGCTTCCCTTCCTAAGCGCT  
TTTGGGTTTATTATTTTGTAGGAGATTCTGTTATTTGGGAGCGTTCAAGGTCTATCTTGAAAATAGGGT  
TCCCTATACTCTTTCTTATTTATTTCTACTCTCACTATCTATTTGCGAGTAATACAGCACATATTGCAGC  
CATGTACCCTATCTTTCTTACAGTATCCATCTCCTTAGGCGCGAATCCTATGTTGCTGCCTTAGCCTTA  
GCTTTGCTAGTAAATTTATTCGGAGGACTCACACACTACGGATCTGGTCCAGCTCCGTTATACTTTGAT  
CCCATTTCTGCTCCGTGCAAGAATGGTGGCGCTCTGGCTTTATTTCTTAGCATAGTCAATCTAACCATTG  
GTTGGGATTAGGAAGTTGGTGGTGGTACTGTTTAGGATTAATTCGCTAACGTGTTGAGCAAAAGCTTAT  
GTCGTCGAAATAACATGCTTCTCTTTGTCAAAAGACGCCTTCTTTGTGTCGGGAGCTTCAAAAGCTCCT  
GCTCTTCTATTAACAGAAGACATAAGTTTAAAAGCTCTTCTTAATGAACGCATTGACTCTGTTGCAGAAC  
TATTTTCATGCACTTATAACTCTCCCTACTACAAAATTTATTTTCGAAGTCCGATCTTTCCGCTGAGACCT  
TCCCTTAAAGTGGGCGTTATGCTTTCTGGAGGCCAGCTCCTGGTGGGCACAATGTCATCTTAGGATTG  
CTACACAGTATAAAAGCTCCATCCGGATAGTCAGCTTTTAGGATTTATTCGCAATGGAGAAGGACTTC  
TCAATAATAACTGTAGAAATCACAGATGAATTCATTGAAGAGTTTCGTAACCTGGAGGCTTTAATTG  
CATAGGAACAGGTGCGACTAATATCATAACCGAAAGAAACAAAGCGCGCTGTTTACAAACAGCAAAATGAA

CTCGA**TTTA**GATGGATTAGTGATTATTGGAGGCGATGGTT**CGAATACAGCCACGGCGATTCTTGCTGAAT**  
AT**TTTG**CTAAGCATCAAG**CAAAA**ACGGTATTAGTTGGTGT**TCC****TAAA**ACTATTGATGGAGA**TTTG**CAGCA  
CCTATT**TTTAGACCTCACATTTGGGTTTG**GATACTGCTAC**TAAA**AT**TTTA**ATTCATCCATCATCAGCAACAT**TT**  
**TC**TAGAGACGCATTATCGTG**TAAA**GGCCACTATCAT**TTTAT****TAAA**CTAATGGGCCGGTCTTCTCTCATA  
TCACGCTAGAATGCGCACTACAGACTCACC**CAAA**TATTGCTCTTATAGGCGAAGAGATTGCAG**GAAA**AAAG  
CATCTCCTTA**GAAA**CATTAATCCATGATA**TTTGT****GAAA**TAATAGCAGATCGAGCTGCTATGGG**GAAA**TAC  
CATGGCGTTATTCTCATCCCTGAAGGAGTCATTGAG**TTTAT****TCC****TGAAA**TACAGTCTCTGGT**TAAAGAAA**  
TTGAATCCATTCCAGAGCAGGAGAATC**TTTA**CCAAGC**TTTA**TCCCTTATCTTCTCAGCAACT**TTTA**TGCCA  
A**TTTC**CGGAAGATA**TTTG**CCATCAGCTCTTGATAATAGAGATGCTCATGGCAACGTCTATGTAT**CAAAA**  
ATTAGTGT**TGATAAAA**CTTCTGATTCATCTAGTTCGTCAACA**TTTAGAAA**CACAT**TTTAGACAAGTTCCCT**  
TCAATGCAATCTCCCAT**TTTA**AGGTTATGAAGGGCGTTCAGGAAC**TCC**TACACAT**TTTG**GATAATGTGTA  
TAGCTATAACTTAGGATATGGTGTGGGGTCTCGT**TTTA**ACCGCTGTAATGGGT**TTTA**TCCACGATC  
GAAGGTCTAACTAGCCCTATT**GAAA**AATGGCGATTGCGCGC**TTTA**CCATTGTT**CGAATGTTGACGACCA**  
AGCAGGG**GAAA**GACAG**TAAA**CATTATCCTCTGAT**TAAA**AAAAAGATTGGTAGATATTGCTAGTCTGTT**TT**  
**TAATAAGTTCTCACTGTATCGGAAA**ATCTGGGCT**TTTA**GAA**ACTCCTATCGCTTTG**TAGGGCCATT**CAA**  
**ATACAT**TCTCCGGAGGATGCTCATTCTGATGAT**TTTC**CTCC**TTTAAT****TTTG**TT**TTG**AATCATAATGAAT  
GG**CAAAA**ACCGCTGTTCTA**TTTGT****TTAGAAA**TCCCCGATCAGGATTATTAACCATCTCAATGGACATAACT  
**AAAGAGCTTCCCT**CATTATGATGCAACAACCTCATTACTTCCCTCATT**CAAAA**AAAGATC**TTTGAAA**TAC  
CTCTATTAGATAATGTGACTTCTCTAGGGGTTCTGCATATTCCCTCACTCTCAAG**GAAA**AAACC**TTTC**CTCT  
TGTTATCGTGTTCATGGGTTAGCTTCTAG**CAAAA**ATTGGAAC**CAAA**CGTTCCCTATCTCCATCTAGCTAAT  
CAACTAGTACAAGAAGGTATCGGAGTATTACGAGTTGATCTCCAGGGCATGGTGATTCGGAAGGA**TTTA**  
TCCATGAAT**TTTC**CTTACCATTATATTCAAGCCTCT**CAAAA**AAATCATT**CAAGTTTG**GTCT**TTTC**CTGCC  
TCAAGCCAATCATTCTGTTGCCTTG**TTTG**GTCTCGTC**TTTAG**GAGGCAGCTTATCCCTACTGAACCTTCC  
TACTTCCAGAGATTCAACATGCTGCTA**TTTG**GACTCCTACAATCCAAGGGC**TTTA**TGGTTAGAAGACA  
CTATGCAGTCTATGTCGCCCTCTCTCAACTCCCCCTGATAATT**TTTCT**TATCAAGGTATTCCCTCTTG  
**GAAA**AAATCTGCTCACA**TTTA**T**TCGAGCTCGATACCGTAGATGCGCTTTCCAAA**ATCACGCAAGAAG**TT**  
**TC**TATTCT**TTTA**CTTACAAGGCGAAGACGATGCCGTTGATCCTTACGTCATCAAGCTCTT**TTTGCAAAA**  
CT**TTTC**ACAGG**CAAA**GCTTCCATCGCACATATCC**TAAA**ATGACTCATCAGC**TTTG**CATATACTCCGAAGC  
**TTTTC**AAGACCTTGTGATTGGC**TAAA**ACATCAATTATTGGGCACACCATGGAGCTACTCTCTG**TAAATA**  
AGAGCTAC**TTTGA**ACTA**CAAA**GACTACACTATCGTCCAGATACTCTGAGTCTATTGAATAGCTTGTGTT  
GATGCATATT**CAAGAAA**AGCCTTCTTCCGAACCGGCTT**CAAGTTTG**CTAGCTAAGCATATTCCCTACCTA  
TGTGCTCTCCAGACCTCACTCT**CAAAA**AAGATGCTCCTTCTTCTGAGCC**TTTA**CGTATCGGAGT**TT**  
**TACT**GT**CAAGGAGGACAGGCTCCTGGCGTCATAACGTAGTCATCGGATTATTG**AAGGATTACGCGC**TT**  
**TAA****TAAAGAAA**CA**AAA**GCTCTTCCGGT**TTTAT****TAAA**GGCCCTCTTGACTTATT**CGAGGATTATATAAGGAT**  
CTAGATATCTGTTATCTATGATTATTACAATGCTGGAGGG**TTTG**ATATGCTCTCTTAGCAGAG**GAAA**  
AAAT**CAAAA**CA**AAA**AGAACAAGAGCGCTATTCTTGCTACAG**TAAA**AAAAAT**GAAA**CTCCACGGTCTGCT  
CATTGTAGGAGGAGATAACTCCAATACAGACACTGCAATGCTAGCAGAATAT**TTTA**TCGAGCATAATTGC  
CCTACAGCAGTTATTGGTGTCCCTAAGACTATCGATGGGGA**TTTAAA**AAACGCTTGGATAG**GAAA**CTCCT**TT**  
**TAGGA****TTTC**CATACATCTTGCCGCACTTATTCT**GAAA**TGATCG**GAAA****TTTGAAA**AAGATGTTCT**TTTC**TAC  
TCG**CAAA**TACCATCAT**TTTGT****CAAA**TTGATGGGTGAACAAGCTTCTCACAGTACGTTGGAATGCGGTCTT  
CAGACACTGCCTAATATTACCCTAATAGGAGAAGAAGTTGCTGTTCAACATGCCTC**TTTACAAA**GCTTAA  
GTCTCAGTATTGCTCAAGGGTTGATCGAGCGC**TTTC**ATAGAGG**GAAA**GACTACAGTACTATTCTCATTCC  
TGAAGGCTTAAT**CAAA**CA**AA**TCCCTGATA**CAAAA**ACGATTAATCCAAGAATTGAACAC**TTTA**ATTGCTGAA  
GAACAAT**TTTC**TGTT**CATAATTTG**GACCAACAATATCCCCAATGGCTATC**GAAA****TTTC**CTTCTCTCTC  
CAG**GAAA**ATATT**CGAGACCAATTACTTCTAGATCGAGATTCTTATGGGAATATT**CGGGTATC**TAAA**ATTGC  
CATTGAAGAGCT**TTTAG**CTTCT**TTTAG**TTAG**CAAA**G**AAATCTCTAAGCTTGAACCTACAATGTCTTTCT**  
CCTGTAAACAT**TTTC**TAGGATACGAATCTCGAGCAAG**TTTC**CCTTCTAAT**TTTG**ATTCCAATTATGGT**TT**  
**TAG**CATTAGGAATAGCTGCTTCTCTTCTTAGTAAGAGG**GAAA**ACAGGGTATATGGTCACGATAGGCAA  
TCTAGCA**GAAA**CTTATACCGAATGGACCATCGCAGCGACTCCT**TTTA**T**CAAAA**ATGATGCACTTA**GAAAA**  
CGGTTCAATCAAGAGACTCCAGTAAT**CAAAA**ACAGATTCTGTATCTCCAGATGCCCCATGG**CAAAA**AT**TT**  
**TACA****TAAA**AT**GAAA**GAGATCTG**TTTA**TTAGAAGATT**CGTACCGATTCCCCGGACC**GT**TACAATA****TTTC**GA  
AGAACAAGCTCTTGTGATCAGCGTCCACTAACATTAC**TTTGG****GAAA**AAG**GAAA**ATTATCGGAGAATAAC  
GCGA**CAAA**ATTCTAA**GAAA**ACAACAG**GAAA**ACTGTGCGGT**GAAA**GCTAGAAGAATCATA**GAAA**CGAGGAGAT

AGCGGTAGTCGGACTTGAACCAACGACACGCGGATTATGATTCCGCTGCTCTAACCACCTGAGCTATAACC  
GCCTCAAACAATCTAAA AAATTAGCGGGAGAAGGATTCGAACCTCCGACC TTG GGTATGAGCCCAACG  
AGATGACCACTACTCTATCCCGCGGTAGAAA GTCTAAGATTATCACATTCTTAGAT TTTCATGCAAGTAA  
TTTG GCTC TTTAATA TTTC CCATGTCGTGTTGAAA GCTAT TTTC TTCCTGCTT CAAA AAAGA TTTC CCCTT  
TTC AATATAAGCTTGGCGGTTTT TTTC GT TTG AAGAAGATCTGTA ACTACATC TAAA AGAG TTTC TTTG  
TTCACA GAAAGTCTGCTTCTT TTTC CCGCAACC TTTC AGCAAGAACAGATTGAGAA TAAA TATAAGGTC  
CAAA CATAAGAGGGCGCCTCTT TTG AAGAGGCTCTAA TAAATTATGCCCTCCTACAGATGGATC GAAAGT  
TCCTCCTA CAAATGCAATATCTGCTGCAGAG TAAA TATCTTTTA ATACCCCATAGCGTCCATAAT TAAA  
GAATTATATTGCCG GAAAGAAGCACCTTGACTCCATAATC CAAATAAAATCCCAGCCT TTTC TAGTAGCT  
TAGCATGCTCCT TTTA ACTTCTCAAGATGTCTAGGAACCCAT AAAATTT TTG TAGAAGAATTGTG GAAATG  
T GAAA CCACTTCAGCCCATACCTCTACATC TTTA GGATGCATAGAACCCAAATA CAATTAAGCGATCCTGA  
GAAGATA TTGTAAT TTGCTCTC CAAA AATCTCGGCGA TTG TGGCAAGAGAGGATTCTATAAAA CGTT  
TCATG TTTC CAGTGACATGAATCTTATCCGAGGAAA TACCTATCTGCA TAAA CCGTTG TTTA TACAGCTC  
GTCTTG TAGTATCAA TAAATCTAACGGAG CAAA AATAATTCCTTCTA ACCGCT TTTAAAAA GAAA AACGC  
TTACAAGAATGTTCC GAAAGTTG CCATTAAT CAAA AAGGCT TTG CCCC TAAA CG TTTGGATTCTGTCA  
AAAAATGTAACCAACAGTCTCCTTCT GAAAAGATCACGATATCAGGAGCAAGCTTGC GAACCACGGATTT  
AATAATACA ACT TAAA TCCAGAGG TAAA CAAA TACAGTAGCGCCAAGAGATT CATA CAAA CGACGAGCG  
GTGTGCACACCAGCTTCAGAACACGTTGTAACAA CAAA CCGCCATTCTG GAAA CTCTTCTCTCCATCGAT  
TAAGAAGGGGAGCCAACAGACTGACTTCCCCACAGAAGCTCCAT GAAAC CAAAC TAAAGGGCCTTCCCC  
TTTC AC GAAAGG TTTC TGTACCC CAAACCGAAT TTTC CAAGAGTCAATATATTTCC CATG GAAAAACACT  
TTGTAAA AAATACGTGGCGCC GAAACAAAAAAGCG CAAAC TAAA AACGCATCATAGAGACGAGATGTTA  
ACCAACGTCTTATCATAACA CAAAG TTTA ACCAGTCGAGCAGGAA CAAA AATAGCCTT TTTC ACTTCACAC  
CCCTCTAAGTACTTAGATGCAGATTCCTTGGCTAACGCTAGGACTTCTTCTTTA GAAGCATCCTTCATAA  
TATCTAGTCGAGCTCGAAG TTTA CCA TTTA CCTGAACTACAATAGTAACTGTCTGTTCTTC TAAA TACTC  
AGG CAAA AACTCGGCCATCCGGACTTCTGAACACCAGGAGAATTGCCTAAC AACACCCACA ACTCTTCA  
CTAATGTGAGGAGCAATTGGAGC CAAAG CCGCAACAGCCATTTTC TACAGCACTCTTCGGATATACAGCGA  
GCTTCA CAAAGTCATTGA TAAA CTCCA TAAAAGAGGACGGTATCGTATT CAAA GACAATTTTTC AATAGC  
ATCTGTTACTCGCTGCACAAGCTTATGCGCTAATGATAAGCCTT CAAA ATTGTTATCTTCTTAACTCGA  
TCAGAAGAGACCA TTTC ATAAAACGATT CAAA AATCGTCTGCAACCAGCAACTCCTTGGTTAGACCAGA  
G TTTA TTTTATCT TAAAGGCCCTGAAA ACATTGCGTACATCCGAACAGCGTCAGCTC CAAA TTCATCTAT  
CAAGATCTGAGGATCCACCCCATTTA ATTTGGATT TTC GACATCTTTTC TTGACGGACATCCA ACTCTTCT  
CCCGAAGGAGCAACCCA TTTC CCGT TTTC TTTCTTTGCTGTTTC AGGATATATATATCC TTTC CCAGGAA  
TGGATAAGATGTCGCCAATACCAAGCCTTGATTGACAAGCTTCT TAAA AGGCTCGGGTGTGAAA CAAT  
CCCAGCTTCATA GAAA ACCTGATGCCA GAAACCGCGCA TAAAGTAAGTGCAGTACAGCATGTTCTGCACCT  
CCAATATAAGATCTACTGGCATCCAATATTGTTCTT TTTC CTTTG CCCAGGGAGCGCCGAGTTGTGGG  
CATCG CAAA AACG TAAA TAGTACCAGCAAGAGCCTGCCATTGAGGCATGGTATGTG TTTC ACG TTTC CC  
AGCTCGTTGTGTCTCCGTGTC GAAA ACTTGTACCCACTCTCGCACCTTAGC CAAA GGTCCTTGTCCGACC  
CCTTCTGGTCGATAATCTTGAAT TTTC CGGAGGTAACAATGGAAGTTCATCGTCTCT TAAAGGACGACAAG  
AGCCATCTT CAAA ATGGATAATCGGTATAGGCTCCCCCAATAACGTTGACGCGAGAATAGCCAGTCTCG  
CAACTTATAAGCGATT TTG CTGCTCCAAGATGATTCTCTT TAAA AAGTTAATCACATATTGCTTAGCT  
TCTTCTCCGGACAATCCATC CAAA TGGAACCCTT CACAACAGCTATTAATACAGACACCTTCTTCATTA  
GCACGGAGACTACAGG TAAAT TAAA CTGTTCCG CAAA AAG CAAA TCACGTTCTGTCATGAGCAGGAACTCC  
CATGACAGCTCCTGAAC CAAA GCCCATTAATACATAATCTGCGATCCAGATAGGGATAAGTTCTGTGAGTG  
ACAGGATGT TTG CGTAAGATCCC G TAAAGACCCCACTCTTAGT TTTC ATCTCGCTGATGCGATCTC TTT  
CGCT TTTA CTTTG TTTCTTTA ATATACTGTGCCACAACAGCCT TTG CT CATCAGAAGTGAGGAGATC  
GACCAAGGGATGTT CAGGAGCTAAGGC TAAAAA GAAA CTCTAT CAAAGTGTCCGGTCTTGTGTGAAG  
ACTTCTATTGCTCCATGTTCTGTGG CAAA ATTAACAGAAGCTCCTGAAGACTTCCCAATCCAATCTTCT  
GCAATTG TTG ACAC TTTC TGGCCAATCCAGCTCATCTAGTCTTCTAGGAGCTGATCCGCGAATGCTGT  
AATACGCAGCACCCATTGGCGAAGCATCTCC TTTC AACAGGATACCCCCATCAACA GAAA ATCCGT TT  
TCAATCTCTTCA TTTA CAGTCCCCAACTCAGGACAATAGTTAACAGCCATATCGGCCATATAGG  
CTAATCC TTTC TCA TAAA GGAT TAAA AAAAGCT TTG AGTCCA TTTA TAATATTCTGGATCTGAAGTAGC  
GAACTCTCGAC TTTC GTCGTAAGAGAACCCCATTCAGTAACTG TTTC TTT GAAA TTAGCGATGTT TTTC  
TCTGTGGTCTCTCTTGGGTGTGTCCCGTGGCTATAGCATACTGCTCTGCAGGCAACC CAAA ACTATCCC

AACCCATAGGATGTAAACTGAAAACCCCTGGGCTCGCTTACACCTTGGCACAATATCTGTTGCTGTATA  
GCCAATTAGATGCCCCACGTGCAACCCTGCCCCAGATGGATAAGGAAACATATCTAAACATAGTATTTT  
GTTTTAGTTTCATCCTCCTCAGCCTTAAAAACTTGCTCGTTCTTCAAAACCTTTGCCATTTTCTTCTA  
TGAGACCGGGATCATAGCGCATAGCACCTAACCTGTTGTTATTTTAAGGTTTCTCTCCTTACAACCGC  
CTTGCACTTAGAGAATAAGCGTCAACATACACTATGTCTGAGATCGAAATCAAGTCTCTCCAGTC  
TGCGAATCCATCATCTTTTTTTTAATGCGATCCTGGTATACACTTCCCCTTCCCAATCTTACAGAGAT  
CTCTGCTTATGTCCCACCTCTTCTCTAAAGCCTGTCAATATTTTCAGGAGGAGTTAATTCCTCTGTTAG  
AGCGTGTGAGCCGTTAATATCACTCCTCCTATAGTAGCTCGTGCCTCTAAAGAGGTTTTATAGATTCT  
CTGGAATAAACGTTTATAGACTTTTGTGGATCATGGGGATCTCTTATCCATGGACATAGTACCCTAAGA  
TTTTGTGCAGCTATCCGACAGGGCTTAGAACGAGGAAGTTCTTATGGCCTCACGTCCGAACAAGAAAATTCT  
CTTTGCCGAAGAAAATTTTTCGTATTTGGGATTAGAGAATACTAATAATTCGCTTCATGTCCACGGGA  
TCGGAAGCAACTATGACTGCTGTTGACTTGTAGAGGTATCACAGGACGACCTATTATCATTAAGTTT  
TGGGATGCTACCACGGCCATGCAGATACTTTCTTCAAGAAAACCCCTTTCCATACTTCGCTAGACAC  
TTTAGACCTCGCTCATCCTCTTACCCTCTCTTACCCTTCAATGATTTCCCTTATTTCAAACCTGTTATG  
AATAGCTTGGGGCATAAGGTGCTGGAGTCATTTTGAGCCTGTATGTGCGAATATGGGGGTGATTCTCC  
CCGTCCCTGATTTTATTTGAAGGAGTTATCTAAACCTGCCAGCAGACCGGATCTTTTTCATTATGGATGA  
AGTGGTGACGGGATTCGGGTGCGACAAGGTGGAGCTGCGGCTTTGTATCATGTGAAACCTGATATTCTT  
GTTTTTGGGAAAATTTTAGGTGGAGGCTTACCTGCATCAGCAGTTGTTGCACCTAAAGACATTATGGACC  
ATCTGGCACCCGAAGGAAAATCTTCCAAGCTGGAACACTTTCAGGAAATCTTTGGCTATGATCGCAGG  
GAAAGTATCTGTCAACTTATGTGCGGAACAAGGTTTTACACACAACCTCGCAACTATTGAGCAAACTTT  
TTATCCCCTATTGAACACATGATTCGAACCTACAGGAATCCCTGTTACATTGGTGCATATGGAAGCCTCT  
TTTCTTTTCTTTAACCAATAGGCCTAACAACTTTCGGATGCACAACCTAGCGATATCGAAGCTTT  
TCAAAAGTTTATCAATCTGCTTTCTCAAAAGGAGTATATCTGTCTCCTTCTCCTTTTGAAGCCAGCTTT  
TTATCCGCAGCTCACTCTATGGAAAGTTTAGATTACGCCAAACTGCATTGATAGAAAGCTTGAACAAG  
TCTTTTCTTTAGTTTAGTAGTAGATTTTCAGGAATTGTGATAACGAAGCAAAACGCCCTCAAGATGTT  
GGAGAACATCGACCACATTCTTCTGAGCATCAGTAAAAATAATTTCTGACTCGAAGGAGCTAAGAA  
CCACAACCCCTCTAAACTCTTTTCTAACTGGCCACCTTGCCAACCACTGTATCTAAACATAAGAGC  
ATCTTGTGTCGACGAGTTCCGCCCTCTTTTACCAGCAAAAGAAAATCTCCTCCGAGAAAATACGGACG  
GACAAATTTCTATAGAAGAATTCGCACTATCTGGGCTCGTATGCAACAACATAATCTGATTGCTTGCAG  
AGGGCCTCCCATACAAAGCGAACCCTTGGACTCATCAAAATGATCTAAAGGAAAAATTTCTTCTGGCGAA  
TCAAATTTCTAGAATTTGTTAAGAATTAACCCAAAAGATCCATTTGGACTATGCTCACAAAGCAAAACCA  
CACTTCTCGAAAAAATGCCTCCATTAACATCTGGAGAAGCTACAAGCAAAGAACCCTTGTCTAAAGGGC  
GTAAGGAAGTTTGTACATAACATCTTATTGTAACAATCTAATCTTCGTATGGGATAGCTTCATCAAAAT  
GGACTTCACACAGAGAATAGGGACTTGATACTTAATTGCTAAAGGAATGCTATCACTGGGACGAGCATCT  
ATGTCAGCTATGTAACAACGGTCTCCCCGCTTCTGCTCTAAAAACAATCGTGAAATAAGACATTATCCT  
TGTATTCTGTAATGACTACTCTCACGACAGATAGATCAAAGCTTGTAAAACAAAGTTGAGAACGTCATG  
TGTTGAAGGACGTGAGCGCTCTTCTTCTGCTGCCAGATCTTACGTTTTTGAAAGCGGTATCCATTGAA  
GCGTGACCATAGATGGCGAAGCTTTCTCGTCCGTTCTAAAAATAATCCCTGCATAGTTGCGGAACTTA  
CTAAATTTATAAAAATTAATTAATAATTAGTGAAGTGTGCTTATGATTTCTCGATCAATATTATATGTT  
CTTTTTCGGACAATAGAACCCTCGGCCTAACCTACCCACACCTCGGCTTTTGTATAACAAAACCGAC  
ATCAATAATGCCACGAAATTTGTAATAGTCTAATCATATCCTCTTCGGGATTCGCATAGGAATCGGGTGT  
CGCACATCGTAAATATAATTGCCATTATCCGTGATAAAACGTTCTCCTGCAGAAGTTCTCTCCATTCTC  
CAAAATATCCCTGTTTATTCAATATCCTCTGTACAGAAGAGCAACCAAAAGGAGCAATCTCTATAGGCAA  
TGAAAATTTCCCTAATGTGGGAACAAGTTTCTTTCTATCTACTAGAATAACATTGCGCTTCCCGCTCTGA  
AGAAGAATTTTTCGCGAAAAGAGCTCCCCCTCCTCTTTGATCATAACGTAAGCAAGGATCAACTTCAT  
CCGCTCCATCCACGACCAAGTCTACATCTTGCAATAAAGATGATCCAAATAAGGAAATCCCCTGCTTC  
AGCTAATAGCTGAGATATCCTTGAAGAGGCTACCGCTGTGATTACCAACGTTCTGTCCGAACACGATCT  
CTAAAGCCAAAATGAACTCTCTAGCCGCTCGAGCCGCTCCCTAACCCACACACATTCCTGGCTCCACCA  
AAGCTACTGCCTCTAGCGTAGTTCTGCTTGTATAGGAAAAATTTGTCGGAAAGAAAAGAGTTCTCGGG  
TTGTTTAGACATAAACTCTCAAAAGAATCTAAAAAAGGAGGGCTTCTATTCTCAAAAGTAATCCTAC  
AACCTCTTCAAGATTCCTTCAAGCTTTTATCAAGACTTAACCAAAATATGCAGGTAGAGCTCGTTTAAAT  
AACGAAAGGTCACTTACTCTCTGGCAGAATTCTGTAGAGTCTGAGTATTAATAATAGTAGCTAGCTGAT  
TCACTTGCCTTACAGAAAGACTCCTCGAGTATAAAACCTAAATAAATGTAGAGAGAAGTCTGTTCTAA

GAGTTTTTTTTC TGATGAAGGTAAA AAGGTTCTCAA TTTCTTCTGCAAGCCTACTTGTTCTAAA GAAGCG  
CTTAACCACAAGAGAATATTGTCTTCGCA TAAAGGTGGGTAAGAATCGAA TAAAGCTTGTAATTGCTTAA  
TAACTTCAAGCATACTG CAAAATCAGCCTTGAGATCTGCAGAAGAAGCTTTTG CAATCAATCC TAAAAC  
CCCTGAAGGAAT TTTCTGGTCTAAA GC TTTCAA CAAA GAGCTTAACTGCTCT TTTA GGACTACCTTGACTA  
CCTGAAGACTTGGATT CAAATCGCTTAGGAAGAGCTCT TAAA CAACAGCCTGGATCTATATCACGATA CA  
AA CAAGAGACTTCTTCACGTGACTT TTTCTTAGTCTT TTTATCTTCTTCACGTAAAAC TTTCTGCAACCC  
TGCAGCCCAAGCGGAATCTTGTGAATAACTACTTGC TAAAGCAAGAGCT GAAA TCACATTCCCTGTATCC  
AG GAAA TCATAAA TACGAT TTTCTTACAGAGACATCCTTATAT TTTCTCAGCTACAGCAGTTGTGATATACT  
GATTGTACTCCGGATTC CCAAACCG GAAA A GAAA ATATTCAT GAAA GAAGGGAAGCCTC TAA  
AGCTAGCT TTTCTTTC CTTATTGTC TTTCAAGCT TTTACTCAC CAAA ATCCCTTGGTGAGTCTTCTCAAT C  
AAA GATAGAAA GGGAGCTG CAAAT TTTCTTAGGATCAGAAA GAGCTCCACACAAC CAAA CCAGCCCGTTAG  
GGAATCCGCCTTGAGGAGGCTGTAACATCTTCTCAGCATGACGCGTAATCTTTA GAATCGGATTCTTGTC  
TGGT GAAA ATGATAC TAAA AAAAAACACCTGC TAAA TGAGAAGGTTCTATAGGGAATGGAGCATCTT TTTCT  
GTAGGAAT TAAAGCGCTAATCCCTCACAGACAAA AGT GAAA TCATTATTCACTCTATCAAGATGCTGCT  
TATATTT TTTA TAACTGTGCCAATTCCTTT TTTG AAGAACACGCA TTTCTCAGCGCTTTT TTTGATCCCAAT  
CCGATTAGGGAGAGAATCATCTGCTTGTCCG GAAA TAAGCGGAATAC TAGCACCACGTCCTTTA CGGAGA  
GTCC TAAA ATAGGTGACTCC GAAA AGTGATCTTGCAGACCACTACTCAAGAA TTTA ATTCGTATTGCAA  
CAAGCTTAGCATTAGCTATATATAC CAAA AACGAAGCTGTTAATGCTACGATCGA TAAAG CAAA GAGAAC  
CCCTACAACAATTGAAGCTGCAACTGGGAATCCGGGAACAGATAGAGCGACCACAAGCAACAATAATAAT  
GCTGCAGCTGCTACAGCAGAGACTAACCCATA TAAA TTGGCTTTG TCTGGACCGAGCCATGGCTCGATCAC  
ACTGAGTCTCT TAAA AACT GAAA AACTCCTCTAGTAGAGTCCGGGAGATTGAGAGGAGAGTCTGTTCCGAT  
AAAAACTAT TTTCTCTT TTTAATTT TTTA TTTTACACACATTGAATACCAAGGTTAT TTTA ATATAACTGA  
TCTTTA GAAACGGG GAAA AATCGCAGAGTCT TTTCTAT TTTCTTTA CCTCATCTTCT CAAAGATCTTAAC TAA  
AGACTCCAG GAAA GATCG TTTA TCTTGAGGTT TTTCTCCTAC GAAATAAATG TTTGCATGCTAAG GAAAGAT  
TTA TAGACAATCTGCCATGTGCGATCCGCTCTGACGGAGAGCGTGTGCGCTTT TTTGGGT TTTCCACCAT  
ATTTAAA ATAGGAGCATCTTCGAATGACAACGATT TTTGATCTTCTTGG TAAAGACGCCGACTATCTCCT  
TAACCACAAGTGTGTTA TAAAAAAGAAGCTTTA ACCTTCTTCTGGAGACTTCGTATCACGAGTT TTT  
GCAGAATCAGACAGAAA TAATCGGGTGCTCCGTTCCCTTCAACAGATGTTT CAGTTATGGACGCTTAGGCG  
GAACAGGATACCTCTCTATTCTCCCTGTTGACCAAGGTGTCGAACATACTGCAGGCGCATCG TTTGCCAA  
GAATCCTATGTACT TTTGATCCAGAAA ATATCGTGCCTCTGGCTATGGAAGCTGGCTGTTCCGCTGTAGCT  
TCTTCTATGGCGTGTAAAGTATATTGGCTAGACGATATGCTCA TAAA ATTCCTTT TTTACT TAACTAA  
ACCACAACGAACTGCTATCCTACCCGACAACATATCAC CAAA TCTTCTCAGTCAAGTTGAAGATGCCTA  
TAATATGGGAGCTGTGCTGTCGGAGCAACGAT TTTACT TTTG GATCAGAGTCTTCTTCTGAA GAAA TTGTT  
GCTGTTGCCGAAGCT TTTGCAAGAGCTAGAGAGCTTGGCTTGGCTACAGTGTATGGTGCTATTTA AGGA  
ATCCACAT TTTG TTTGTAATAATGTGGATTACCACACTGCTGCCGATTTA ACAGGGCAAGCGGACCATCT  
TGGAGCAAC TTTA GGAGCTGATATCGTTAAG CAAA AGCTCCCAACTTCAAGGAGGAT TTTAAA ACAATT  
AA TTTCTAGCAAGACTGATGATCTTGTGTACTCGGAGC TTTCTAT CAAA CCACCCTATTGACCTCTGTCCGT  
ACCAGTACTTAATAGTTACTGTG GAAA GGTGGTCTAATTAAC TCCGGAGGCCCTTCTGGGCAAGATGA  
CTTTGCTGAAGCAGC TAAA ACAGCAGTAATTA TAAA CGAGCTGGTGGCATGGGACTGATTTT A GGGAGA  
AAAGC TTTCTCAGAGACCCCTCTCTGAAGGCGTCCGGTTACTCAA TTTA ATTCAGATA TTTATTTA GATC  
CGACAATCTCCATATCATAATTTA GAGGGACTCATGCATCATCG CAAA TCTTCTACCCATTGGGTACTT  
TTA CTGTAGGGATGTTATCCCTTGCAGTAGTTATCAG TTTAC GAAA CCTTCC TTTA ACAG CAAA ACATGG  
CTTATCTACTCTATCT TTTATGCTGTCGCTGTAGCCTGTTTA TGATTCTTACGCACTGATTGCAGCA  
GAATTAGCTTCATT CAAACCACAAGGTA TTTATG TTTG GACACGAGATGCCTTAG GAAA ACGCTGGGGAT  
TC TTTGCTATATGGATGCAGTGG TTTCTATAATATGACTTGGTATCCCGCTATGTTAGCT TTTCTATTGCTAG  
CACACTG TTTAC CAAA TCAGTCCAGATCTTGCCAATAATCGACTGTA TTTGTCATCCGTTATCTCTTG  
GGTT TTTGGGGCTTACCTTCT TTTA AC TTTCTGGGAATAGGAACATCAGCACTA TTTA GTTCTATCTGTG  
TAATFTAGGAAC TTAATCCCGGAGCCATCTTAGTTGCT TTTGCTGCTTACTGGATCCAAGGAGGCAA  
CCCTATCGCCATTAAC TTTCTTGGAGTGAAGTCTTCCAGAT TTTCTCTTCTCCTTCCCTCG TTTGTTCTA  
CTATCCGGAATGCTACTAGCATTATGCGGGTTGGAAGCGAATGCCAA TTTGGCTTCGGATATGGAAGATC  
CTAAA A GAAACTATCC CAAAGCCGT TTTCTATAGGAGCTGTATCCACTCTTGCCAT TTTGGTACTAGGATC  
ATTAGCTATTGCTATCGTAATTC CAAA AGAAGAAA TTAG TTTAG TTTCTGGACTCATTCGAGCTT TTTCT  
CT TTTCTTTGAGAAA TACAACC TTTCTTGGATGACAGGTATCATCGTAGCTATGACGATTGCCGGCTCTC



TAGGAGAACTTAATGCCTGGATGTTTGCGGGAACCAAGGGGCTGTTTCATCTCTACTCAGAATGATTGCCT  
ACCGAAGATCTTTAAGAAAACAACTCTAGGGATGTTCCCAAAACTCATGCTTTTCAAGCGATCGTG  
GTTACCCTATTACATTCATATTTGTTTATGTAGACTCTGCAGACCTAGCTTACTGGATTTTAAAGCGCGT  
TAAGCGTGCAAAATGTATCTAGTCATGTATATTTGTTTGTTCATAGTCGGTCCTGTACTCCGAAATAAAGA  
GCCAAAAGCTCAAAAGACTTTATTTCTGTACCAGGAAAACCTTGTGGAATGTGTGTTCTGTCTACCTTAGGG  
ATTCTTTCCTTGCCATATTTGCTTTGGGAATTAGTTTCTCCCCCTCAAGAAGTAGTCTCTTTTCAACCA  
TGGGCGGCAATTTTGGCTACACAGCTCTTCTGCTTTTAGCTTTTGTTCATTAAGTGTGATTCTTTTGG  
AATGTACTATTCTCACAAGAAATTAATTAATAAAATTTCTTTTGCACAGAAAAGGGCTTTGTAAAAGAGCT  
CTTTTCTTTCTAAGACTTACCTGGAATTTCTAATTCGCAATCTTTAAAATTTTCCCTCATGTTTACACTAC  
AATGTAGTCTCCATGGAATAAATTAGGAAAAGTGTGAAAAGTTAGTGCGCAAAAGCGCTGTATACGCA  
TGCTATGTTACAAAAGCATACGCGTATTGCTGTTGCCTTGAGTGGCGTAAAAGACAGCTTGTC TTGCTA  
CTCATGCTAAAAGCCAATTTCTGGAAGAGGATTCCAGAACTAACTATCCATGCTATCCATATTGGAGGGA  
AATATTCTTGGCGGAGCGGCCGTGACGCGGAATTATCTCTCTTCTA TTTGTGATAAGATCCAAGTCCCTCT  
TATTTCTATCCCCCTCCCCTTATGAAAAGCAGAGAATCCTGAGTGCTATACCTGTTCTCGTATTAGACGTCGC  
CTTCTTTTTGATACAGCTAAAAGCGGTAGGAGCGACCGCTGTGCGATTCGGACATCACCGAGATGATGTTG  
TCCAAAACAACACTAATGAATCTTCTCCAATAAAGCGGAAATTTGCGGGCATGCTTCTGTCTGTTGACATGGT  
TAACTTTGGGATTACAATCCTACGCCCTCTTATTTTCATTCCCGAAGACCTGATCCGTAAATTTGCTAAG  
GAAAAGCGGCTTTGCTCGAATCACTTGTCTGTTGCCCGTTATTTTCTTACGAAAAAAACTGAAGAAGCTT  
TAAAACCTTTGAAAAGCATTTTCTCCTCAAGCAAGACATAATATTGCTTTTGGCTGTTGAGAAAAGGACT  
TTCCAAAGCAAAATCGCGTAGAACAAATACGACTCCTTATTAACAAGAACTTAGTCTTTTCTAGATTTTAAA  
TAAAATTTTATATTAATCATAATACTTGGTTTATTTTCTTATTATTTTAAAAGATCTAATAGCTCATT  
GCGCAGGTTTTTATGCGCAATGAAAAGTATAAGAGGGGGCTCATGACAGAGACACGACGACTTCGCATTC  
TTATTACCAATGATGACGGTATCAAAGCAAAAGGAATCAGTCTGCTGATTTTCTACTCCGTGAAGCTGA  
CTTCGCCGATCTTTTATGTAGTAGCCCCTTTGAAGAACAGTCTGGGAGAAGTATGCTTTTCTCATTAGTA  
GAGCCAACCTGCCCTTGAGCCTTTTGTATTATCCTCAAAGAGTCCAAGAAGCTTGGGCTGTCACCGGCACTC  
CTGTTGACTGCGTGAATTAGCTATAGGAGAAGCTTTTAAAAGAGAAGCTCTGGATCTTATTTTATCGGG  
TATTAATAATGGGAAAATTTCCGACGCTGCCTTTATTACTCTGCCACTGTAGGAGCTATAAGAGAAGCG  
AATCTCCATGGAATTCCTGCGATAGCTCTTTCTCAAAGTGAGAATATCGCTTTTTC CAAGAAGCTCATA  
TGGCCTCCCTAATTCGTTCCCTTATGCGAGTTTACCCTTGCCTATAAGCACACCGATCCCTTAGGACTTAA  
TGTAAATTTCCCCGCTAGCGCGGACGATTCCTCATGAAAAGGAATTCGTTTTCACACTTTCTGAAAATGAA  
TTCTTATTCGGTATCCCAAGATTAGTCCGTACGGAAGGAAATCGTCTTACTATACGCTCTATGATATGC  
GAGATAAAGTATCCGAAGAGTTCTCTGAAGAGTATCTTGCTTTAGCAAATAACTATATTAGTGCAGCTCC  
ACTAGTTTCTAAAATAACCCCTCGAGCAACCTTTTCGAAGAAGAAGCTAGCTTTTCTAAAAGACTCTTTTC  
GAACAATCTGTGTTGTGAAAAGCTTCTTTAAAAGCTCCTTCTGATTACAATAAAGATCTTTTACACCTA  
TAATCCATAATATTCGAAGGGTTTATGTCCTAGGATTTGATTGATTGATTGAGCAGCTTATCAAATGCAAAAT  
GCTTTGTTTGCAGCACTATTTCTTGCATCTTCTACATTGTTCTGCTTTTCTCTCCCTTGCACCCCTTTT  
CTCTCTTTTCTTAGGCTCTATAAAAACGATCTCTCTAGGTGGAAGTGCATTTTTTATCGCCCGCGCTTT  
AGGAATGATCGTAAACCAAGTTGTGGACTGTGCTATGTATAAACGCAACCCTCGCACCCAATCACGGGTA  
CTTCTGACAGACTTCTTTCAATTAACAATTCCATGCTGCTTCTGACTCTCTGTCTTATCCTGTTTCTAA  
GCACTTGTGGCTATTCAATCCTCTTTTGTCTTTCTCTCGCAGTCTTATCTACCCTAATTATGATTATCTA  
CCCTTACAAAAGCGTTTACGTTTCTTTGTCACTGGATTTTGGGGCTGGTATACTATCTAGCAATACTC  
ATGAACTTTTTTGCATCATTGAGACTCCTTCTTTCTCTATTTTGCATGAGTTC TTTATTAGGAATTT  
CTTTGTTGATGATCATTGCAGCAAAATGATATCAATTTATGCACTGCAAGACGTAGAGTTTGTATCAAAAAGA  
AGGCTGTTTAGCATTCCTGCTCGAATTTGGAACGAAAAGCAAGCTATTACAATTGCTTCAGCTAAATTAATA  
GCTAGCGCAATAGCTTACCTTCTTATTTGTTATTTTGTTCGAAATAAACCATCTTCTATCTATGCTCGC  
TTGTGCCTTTAAACCGGATTTCTTGCACAATTAAGCACTATTCTCTTATTGACCAAGAGCTAAGTCTAC  
TCTTCAAATAAATTTCTTTCTTTGGGAACCTTTTCCCTAGGATTCGCGTTT TTTGCTAATATGATTGGACTA  
TTTTTACTAAGAGGAATCTTATGAAGCGCTACGTGGTGGGTAATTTCCGGAGCATCTGGTATTGTATTGGC  
AGTCACATTAGTTTCTGAACTTGCAGATTAGGACATCATATTGATGTCATCATATCGCCATCCGCAAAA  
AAACTCTTTTATTATGAGCTAGATAACCAAGTCTTTTTTATCTACAATCCCTAAAAATTTCTATAACCAGA  
TTGTTCTTACCATATATCCTCTATAAAAAGTCTGTATCATCAGGCTCGAATACTGTAGATGCAACTAT  
TATAGTTCTTGCAGCGTAGCTACTGTTGCAGCAATCTCATGTGGTTTGGCCGATAATCTTTTAAAGAAGA

GTCGCTGATGTTGCTCTGAAAGAAA AAAGACCTCTGATTCTTGTACCACGAGAGGCTCCTCTATCCGCAA  
TACA TTTAGAAA ACTTACTCAAGCTAGCACAGAATGGAGCTGTAATACTCCCTCCTATGCCTA TTTG GTA  
C TTTAAA CCTCAGACTGCAGAAGATATAGCCAATGATATTGTGG GAAA AATCTTAGCCAT TTTA CAGCTA  
GATAGTCCCCTTA TAAA AAGATGGGAGAACCCCCGCTAATGGGAGGTTCTCT TTTG GTTGATTACTTCAT  
G TAAA TTTTCA ATAGCAATGAAGGCGCTAGGGTCTTCTCTGTGCACAATCTCT TTTA AGCTGG GAAA GCTG  
CAACCGTTCGACAACGATA TAAA GAAGA TTTG GAGGCTCCCCA GAAA AACCACTTCTGCATG CAAA TAA  
GTCAACCCTACCCC TAAA GTCTCCATAAGAATG TTTG CTAAT TTTG TAGGAGAAGAGGTAATGATAGTTA  
CAGACTTAGTGTCTTCGAATCC TAAA ATCACCATATCCATAAC TTTA ATAGCCACAGCATAACGTTAG CAA  
AGACA TAAA AGCTGTATGCCAATTGCGG TAAA CAATGCCGCCAAG GAAA AGATGAAGAAG TTTACAAAC  
AAGATGACTTGCCCGACAGTATATCCTCTCTTCTTA TTTA CGATGATCCCTAAGA TTTCCGTTCCGTCAG  
TTGCTCCTCCGTGACGAATAATCAATCCGCTCCGGCTCCCAACACA ACTCCACCAAGGACAATAG TTTG  
TATTTG TGAACCGT CAAA AATAAA GGGTGTATTCCAGCCACTCAGG CAAA ACTTCTATAAGCCATAAC  
CAGCAA GAAA AGATAATAACCGCAGTTATCATCTGTACAACGAAGTACTTCCCTATGCGCTTATAAGCCA  
AA ATGATGAATGGCAAGT TAAA CAACAC TAAA AACACTGGAAGGAACTGATGCC CAAA GAATGAGCTGC  
TATCATAGATAACCCAACGATCCCACCATCGAT TAAA TCGTTGGGAGCGAGAATCATATGAACACCGCAA  
GCGGC TAAA AATCCACCTATGA TAAA CCAACTAAGAGTCTTA GAAA AATATAGAGG GAAAC TAAA TTTG  
TGAAA CGTATGGTATGAGCCATTGTTACCCCTTGGTTGAAGCTCGCGAGAGACGGGGCTCGAACCCGC  
AACTTCCGCCTTGACAGGGCGGTGCTCTAACCAGTTGAACTACTCCCGCGCAAT TTTG GACACGACAGGA  
TTTG AACCTATGACCCCTGTGTGTAAGACAGGTGCTCTAACCCTGAGCTACGCATC CAAA AGACTAGA  
CGAGACTCTATCAGAA TAAA TAC TTTAAA TACA ACTGTTT TTTG TTCACAACGCAATTTT TTTCAAAA  
ATCCAA TAAA AGCCC TAAA AGCCCTCGACTCTTTAGCA GAAA GTTGAACAATCGACTGCTCTTT TTTG CTT  
GCTCAATAAGTTCTCTAATCGCGATACAACAGCTTCTTGCTCT TTTA AC TAAA TTCTCATAGCAAGAAGA  
CTTTG CTTGTGCAGCATGCATATCGGACACTTGTGAGCATAGCGTTCTAAA ATGTTCAGTGGAATAC  
ACTAATTGCTTTTA ATTCTTGGT TTTG TTTGCCGTAACAATTCTACTTGATCCTCAAGCATCTTTG TTCA  
GCTTTA ATC CAAA GACACTCGCTTCATACG CAAA AATAG TTTATAAA GCC TAAA CT CAAA CAAA CAGCGC  
CTAAGGCAGATAAAA ACTCCAACACCTAT CAAA CCTGCAGA ACTTCC TAAA AGGG CAAA AGATAACACCAT  
ACCTATTTCCCAATAGAAGTGCTCCAATCAATG TAAA TGCTACAGACGCAATCTTTG TACGAAGAGA ACTA  
TCACAC TTTCTTTCTTTG ACCGCT GAAA ACTACCTGATCTCCCGTACTCGACGATCTTACTTCTTACAAT  
TTG TACGAACACAACAGCAACGCATATCGCTCCTCAA TTTG TGTACGTAGTGAATTCATTAATCACAGAT  
TACCAACA ACTTGCTACTTCCG GAAA CATTTAGACGTTCC CAAA GATTAAGAGAGAAA AAAAAAGCCTCTTC  
ATAAGAAGAGGCTTTG GCTCGG CAAA CTACACCCGAGAGCCGTAATT GAAA TCATAATCATCGCCATCAC  
TGCTATCCGATTTG AGATCCAGGCTATGAGATTAACCGATTTG GCCAGAACCTTTG TCCGAGA CAAA  
GTCGAGATGAGCCTATAG TTTA CAAA AGCTTCTCACATTCTCGATAGCTTTT ATTAGCCGTTTT  
AGCATCCTAATGAGATCTCCTCGTTCGTAACAAA TACGAGAGTAGTGCTCTAACATAGCTTTG AGCTCTT  
CTATCTG TTTG TCTTTA GCAGGCAGGACT TTTA GTC TTTG TTGATACCCCTCCAGCTTC TTTA GAAGATC  
TCGCACATCTTCTCAAGATTCAGACAATAAGCTTGCCACGCC TTTAAA TTTG TCG TAAA TCACGTCTC  
TC TAAA AGACTTGCACACTTAGTATCCAATTCTCCTAGAGCTTTA GCCAATTGTTGCTCTAATTGTGAGA  
TTG TTCTTTG CTGAAGGAGGAGTTGCTCGCGAGCTTCTATTCT TTTA GATCTCAAGCAACA ACTACA  
TGTATTC GAAA CTCTACCCC TAAA ATAACAGCTCC CAAA GCAACCAGAGCGACTCCTGCATAGAAGAAG  
AGAGGCGGCG TAAA GGTACAGAA TAAA GCCAATAACAACAGCACCACCAGCAGCTGC TAAA AGCCC TAAA  
CCAACGCAGCGACAGCACTAAT TTTA TAACACAACC CAAA ACCGGTTTTTTTTTTG CTTCAGGTGCTGGCGA  
TAGATCATTAAATCCGTTATTTCGTTCTACTCTATTAGAAGTCCCTAATGCTAAA CTCACCATT TTTG CTT  
CC TTTG CGT TAAA ACAGGAGAGAAA TTGTACATAAA CATTTTT TTTAAGAAA CAAA AAAGCCA TTTG CA  
GGCAGATATCAGGCCA TTTATAT CAAA AACAGAAGGAATGATTAGGA TAAA ACTTTG TCTTGCCATCGTT  
CCAGAGAGCATTGAGAAGCTGTT TTTA TTTA TAAA TACATTGCACTAAGAATCT TAAA ATCGAACAGACAA  
CACAATGGCTCGAACAGACTGATCCACACGCACTAATT CAAA TG CAAA AA ACTTC TAAA ATGAACACAGC  
AAGCTTGA TAAA AACATA TAAA AGAATTGGATCATAGAGCTTTA CGAGAAGGGGCGCACTGCAATCTGTC  
TCGAC CAAA TAGCAATG CAAA CAGA TAAA TACCCCTAATCATTGG GAAA AATTGAGTGTAGAATAGCCTC  
TTG TCTTCTCTA TTTG TTGCTTAGCTAACGCGA TTTCTTC TTTA GAGATATCTGCAAGTCTCTGCTTA  
TC CAAA AAGCCTTGCTCTCAT TTTG CAATA CAAA TCTGTCCAGA GAAA CTTTT TTTG GCTCTCCACCAT  
AGCCAGAAA TTCTAGTAAGAACAGCACCTAGCATCACAGATC CAAA AACAACCAGGGTAACCCTACGTT  
AATCATAGGAAGCGTAGTCCAACCTGCCCAA TAAA TAAGGCTGCTCCTGTA ACTATGAA TAAA ATACTA  
AGAATACCGAGCGCAAGCACAGCAATACGTTGCTACAACA GAAA CTCTCGCTTTA GAAGCGCTATCCA

C C A A A G G A G C C T C T G G C A T A T A A C T T C T A A G A G G T A C A C T A T C T C C A A C A A A A C T C A T G G C A T C C C A C T T  
A A G G T A A A A G A G A T C G G T T A T C A A A A G A G A A G C T T T T C T C T A A A T A G A A A G C G T A T C G T C A A C T C T T T T  
A T A G A T C T A A A A A G T C T T G C T T T C C T T A A T C C C A C C C A T G A A A T T T A G C A T A A A A A C C A T C C A C A T A T T  
C A C A C G C T C T T C T A A A A G G C C T A T T T C C C T A T T T T C T G A G T C T C T A A A A C C C T A T A A T G G C T G G A A A T T  
T T C C G C G C A C T T T C C T T G G C T T C T T G T A A T A G C T G A T C T G A A T T G C G T A T C A C A G A T A A C A G G T A A G A A  
C T A A T C C A A A G C T C C T A T A C A A G A C C A A T A A T T G C A G C T C C T C C A C T A C T C C T A A A A C T A A G G A A G A  
A T A G A C T C C C C C G A G A C A A G A A A A A C T C C T C C T A A A G C T G C A A G C A A A C T T G T T A G A A C A A C T A C A A T  
A A C T G G T A T G T T T T A G A A C G G T G A A T A A A G G A G T T G T T A G C C A C A T T T T C A C T G T A C C T C A G T T T T G C T  
G A A C A A C A A T T C C C T A A A A A A T T G G T A G G A C G C C A A A C G T T C A T A A T T A C T C T A C T T G G A A A C C A T T A A T  
A A T T A T C T C A G A C T T T C T T C C A A T A C A C A T T T C A A C C C A C T T T G A A G C T G C T C T A T T T T T T T C T G A G C A A  
G C T C T A A A T C T T T T G C T C T T T T G A G C A A G C A A T C C T T C A A C T T C T T C A A A T C T T C T T C T G C T T C A T A T A G  
A A G T T C T T G A T A A G A T A A C A C T A A T C C A G G A G T C A G G C C T C T G G A G C T A A C C A G A T G A C T C T G A A G G G  
A G T C T C G T C G G T T T T A A A G A A A A C C C A T A C A T A T A A A C T A G A C T T C C T C T A T A C A G G C A G A A C C C A G T G  
T C A T T G C T A A T A A G C T A A G A A T A G G A G C A A A A A G A G A G A C A C A C T T C C T G A A A A A G A A G C A G A A G A G C  
A C C A C C T A A A A C T G C T A G T A C C C C T A A T A C C A G G G C A C C T A T T G C C A A C A A T T G C T C T T T A C G G C T T G T A  
G T A G T C T G A G C A C C G A T A G T T T C A G T A T G A T C G G C A C G C A A T G G T T T G C T G G A A T T A C A A C A A A A A G A A A  
T A T T A A A C A T G G C G C C T C T A T T T C G C A A A A A A G G C C G A C A T G C T A C A G G A A G C T A A T T A A A G T A A A A A T  
T T T T A T A T A T T T C A A T G G T A G T T A A A T A C C T A A T C T A C C C A A C C A A A A G A T G T C T A A A T G A C A A A A A A T  
A A T C G T A T T T T A T A T T A T C A T G A G A C A C T T A T A G T C A C A T C T G C T T C A T T C A G C T C A A A T T C T A A T G A A A A  
A T C G G A T T T T A G A A G A A G A T A G A C T C G A A G A G T C A G A A C T A G C C A A A A T G T T T G T T C T A A T T C T A T T T T G C  
A A T C C C C G A C T A C A A G A C C A A T A G A G A A A C G T T A A C C C T A C T C C T A A A G C C A C A G A A C C A A T C A T A A T C G  
C T C C A A T A C C T A A A C C G G C A A A C A C A A G C G A C G A T C C C C T G C A A A G C A A A C A A A G C A A G G C T A C A C A A C T  
T A A A A T A G C A A A A A T T C C T A A G G A A A C G G C A A A A T T C T A T A T T T C C T C T T C G T T T G C A A T A A A T A T G C G T C  
T T A T A C A G A C A C A A C T C T G C G G G G C T C T C C A G A G T T G G A G C G C A A G A G G A A C A A A A A G A T A A G A C A T T G  
T C G A C T C C G G A C C A A A A A A G G C C G C G A T A A T A C G C G A G A T G G T A A A A A T A C A C A A A T A T T T T T G A C A T A  
G A A A A C C T T A A C C C T C C T T T C A T C G C G T G A G A C T A G A G T G T A A A A C A A G A T G C G A A A G C A A G G T T C A G T T  
T A T C T G C T A T G T T T G G A A A C A A A C C T C C A C A C G G T C C C G A T T A T C A A A A C A A G T C T T C C A G G G A T A T G T  
T A G A G A A C G T C C T A T C C A T A C C A A A G C A A C A T A T A G A C G T C T T T T G T G A A A A G A C T G A A T A G A G A A T C T  
A A G A A G C T T G G T T A G C G T C T A T A G A T G C T T T A A G A G A C G C T T T T T C C T T T T C A G C A C T A T C C A C C A T C T  
T G T G T A G C T A G A T A A A A C T A A G C G C A C A T C G G A C A A T A A A G C T T G C T C A T T T T T C T C T A A T C T G T C C A A A  
C A A T C A A T C T C A A A T T C C A T T A C C T T A G C T T C C A A A G C T T G G A G A T C G T C C G T A A G A C C T C G C A G A A A C A  
T C T T A T T A A T G A A A G A G A C G G A G G C C A A A G C G T C C T T C T C T T C T G A A A G A T T A C G C A A A C G T T G C T C A G C  
C A A A A C A T T T T T T G C T T C T A A G C T A G C A T A A G A G G A T C G A T A C A T A A G A C G A G A T A T T C C C G C A C C C A C A  
C A A G C A G A T C C A A T A A T T A A T G C A G G A A T A C C T A T T A C A G T A A A T A T G A C A T T G C T A G C G C A C A A A C C A  
A A G C T A A T A C C C C A G C G A C A A C A A C T A A A G C G C C T A C G A T A G C T A A A G C T A T A T C C A A A A T T T T G G A A C A  
A G T A T T C C C T T T T G T T G A A G A C G A A G T A G A T T T T G T C T C T A C G C A G G A A G C T G T T G G C A A C G G T A A A G A A  
G A A G C G T C C G C T A A T A G T A G T A C T C A T T T T T C C A C C T T T T A T T T T T A A A G C G G A A A A C T G T A T C A G  
A A C G G C G C T T T A C T C G C A A A T C A C T A T A A A T C C G C A A C A T G C A G A A C T A A A G C G C C G T A A G C A A A A G G A A  
C C C C T A A C T C T C A G A T G C A A T A T C T G A G G A G T C T T T A A T T A T T T T T A C G A C G G G A T G C C T G C A C C T G C A  
G C C G C T C C G A T A A T G C C T T A T T C T C A G A T C T C A A T T T A C A C A A C T C T G C T G T T A A T T G A C T G C A A G T G T T  
C T G A T T T T G T T G C A A C C G T G T T T A A A C C T T T C T G T C T G A T G A C G A A T T T C T T G T T T A G C A T C C T C C T C A  
A T G G A G C A A A T T G T T G C G G C A T G A C G C T T A C A C A A A T C T A A T A T T T T T T C T T C C A A C T C T T G G C A A T A C T  
T A C T T A C A G C T C G A C G A G C T T C A A G T T C G C T C G G T A A A C C T C A G A A G A G C T T T A T A T T C T T C C T C A A G  
C T C C T C T A T T T G C A T A G A G A C A A C T T C T A A C T G A C G C T C A A T C T C T A C A C G A C G A C T T C G T G C T C T A G C A  
A G G C C T A A T C C T A A A A G A A G G G A A C C A A C C A T A A C T A A G A T C A T A C C A G C A G C T A A A A G A A G C T G G G G T C C  
C G A T T C C T A C T G C T G C A A T C A C A A C C C C G C A G T A G C A A C T A A A A G T C C T A T A A T A A T T A A A G C T A T C C C  
A C A A G T T T T T G A T C C T A C T C T T G C G G A A C A C A T T T G T C G C A T T G T A T C A A C G C G A C T G G A T A T G G C A G C T  
G C T C C T T T T G C G A A A A G A G T A G C A G G T G C A C C T G A A T T A A C A T T A G A A C A G C T C A T T T A T T T C C C C T A A A  
A C T T A A T G C C T A A A C A A A A C T T G G C A A A A G A T T A T A C A T A A T A G C C A T T T T T A A A T A A C T A A A A T A A T G A  
A A G C T A G A A T T G A C A A A T T A A C T T T T T A A C A A T T T T C T T A A C A T C C C C T A T T A G A G A G C T C C T T T C T T  
G C A A A A A A A T C T C T C C T T T C T T A C A T T T A G T G T C A A A A G A T A T A C C C C C T C T C A G A A A A C T G A G G T T T  
T A T A G C G C T C A C C C C T G A A A C T T T T A T T C T C T C C T G A A A A A G C A A T A T G A T G C T T G G C T T A A G C A T A C T G  
C T T G G T T T T G C T T C T G G G A T G G C C G A T C T A T C T T T C G T T T C T C T T A G T G C A G A A G T C A T T T T C G G C T G T T

TTTAAAGCTGCTGAGACTTCTTAGTCTGCCTCTTGTATTTTTGCTATAGGTTGACAATCACTTCGAT  
TAACAATCTAAAATCCATGGTCTCTGTCGTGAGATCCTCTCTACTATAACCTATTGACAACCTTTATT  
TCGGCTGCCATAGCTCTAGTTCTATTTATCTTTA TTAAGCCTTCTGTTCCGTTGTCCGGGTTTAATGCCG  
CTACA GAAACCAATGCGACAGGCTACCTCTCCGTCTTATCAAAAACGATACCCG GAAATATTTTGAACC  
TTTCCTG GAAAGCAATGTGATCGCTGCCGCCTTTTGTCTGCCTTGCTAGCAAC TTTCCTCGCTTTCCTG  
CCAGAAAACGAGCGCTTATTCTGTTG GAAACGC TTTC AATACTCTATTCTCCTTGCTTCTTAGCATCTCTA  
AGGGCATTCTAAAATGCTCCCCTAGCCACATTTG CTTCTCTCTTCTTTTGTTCAGAGAAA TGCGAAC  
AGGTAA TTTGGAAC TTTCATCTTTTG GAGAATACCTGT TTTGTATTGTACAGCTAACTGCCTTCAAGGA  
TTCCTAGTTCTTCCCCTTCTTCTCAAGATGAAGGAATCTCTCC TTTGCGTACG TTTAAGCTCATGTCTC  
GCCCCCTAGCAACTGCGTT TTTCCTCAAAATCTTCTGCAGTTACTCTGCC TTTGACCATGGAAGTTGCCGA  
G GAAA ACTTACACATCCGACCAACAATCTCCCGT TTTGT TTTC CCTCTGTGCTCTGTTATTAATATGAAC  
GCCTGCGCCGATTCATTCTCACCACAGTGTCTGTTCTAGGAGTCTCTAACGGAATCGTCT TTTCCTCTT  
TATCACTGATTAGCTGGGTCTTTA TTGCAAC TTTA GCTGCCGTAG GAAATGCAGGCGTTTCTATGGGATG  
CTAC TTTC TAACTTCATCATTGCTAGCCTCTATGAATGTCCCTCTAGGTCTTCTTGGCCTTATTCTTCCCT  
GCATATGCCTTGTTAGATATGCTA GAAAC TTTGATTAACGTTTGTCTGATTGCTGCATTG TTTC TGTA  
TTAA TAAAAAAT TTTC T GAAACAGAGATCTCCCGCCTGCTCTTACACCAATGAATAGCGAGCCTTGAG  
ATACAGGTCTTTATCAGCTCAAAAACATCGCTTCTATTAGAGGTAGAGAT GAAA TAATTGTTGAGCTACC  
ATCGAAGAGCTATTCTGTTAATCACGAGATCT TTTCGTTTGAAA GGATTGTTGACTGCACAGGTTCCACT  
CCTTCTATGACTACTCTAAAAGAGAATGATTTATGAA TAAAAAAAATACAGTATTCTCATCAAGACTAGG  
ATTCTATTGTTGTCGATGATGGGAGTTGCTATCGGAGCCGGAATA TTTGGCGATTTCCTAGAATGGTAGCT  
CAAAAATGGCGGCGGAACC TTTATTTCTTCTTTGTTACTGTTTC TAATTA TTTG TCGATTCC TTTAATTA  
TCGTTGAATCTCTATAGGGAAA CTCACTAGAAAAGCTCCCATCGGCGCTCTGATTGAAACCGGGGCC  
TAAAATCTGCTTGGCTAGGAGGATTTA TTGTTCTTGTAGCAACATGCATACTGGATACTACTCCAATATT  
GTGGGATGGGGATTTAGCTACTTCTTTAATTCCTATCCGG GAAAATTGTCCCAGGGAACCAC TTTCCTC  
AAC TTTGGGCACATCACTGT CAAAAGCTGGATGCCTCTAAGTTGCCACTG TTTAGCTCTATTTCTCGCTTA  
TTGTATCATTCTG GAAA GGAATCGTTAACGGAATA GAAA CTGTAATAAGATT TTTGATCCCGTTCTTTTC  
ATTTGCGCTCTTGTCTATTAGCTAGGGCGGTATCCCTGCCTCATGCTTTGGGAGGCATTTCGCTACTCT  
TTGTATTTAACAAA GCTTCTCTGTGCGATTACAAA GTATGGATAGAAGCTTTTAACC CAAAATGCTTGGGA  
TACAGGAGCTGGTTGGGGCTTCTTCTTGTATACGCGGGATTCTGCTT CAAAACAAA CCAGCTTAGTCACC  
AACGGAGCCATTACAGCTATCA CAAA TAATTTTATTTCT TTTCTCATGGCTGTAATAGTGTCTCCGCTT  
GCGCATCGTTAGATTCAACG GAAA TGTAGGATTACGAGAAGGCGTCGGCGCATCCAATATAGGAATGGC  
TTTTATTTATCTCCAGAACTATTTA CTGCGTCCCTCATGCCACATTTCTCTACATTT TTTA GCGCA  
ATCTTCTTCTAGCCTTCTCTATGGCGCCCTATCTTCGATGATCTCGATGCTGTTCCCTTCTGTG CAAA  
CATTAAC TGAATTTG GCATCAAAAACATATTGCAGAATCTTCTGCAACCATTGCTGCG TTTCTTATCGG  
AGTTCCTTCTGCGTTGAA TTTACAATTT TTTGATAACCAAGACATAGTCTGGGGAATCGCTCTTATTCTC  
AATGGCATGATT TTTATTTATTCCGCATTGAGCTACGGAATTAAGCGCTTAAGACAAGATGTTATCAATT  
CTGTTCCGGGTGATTA TAAAT TAAA AACTTACTTCGACATGTTGG TAAAATTT TTTACTCCC TTTA GAAGG  
AGTCTTACTGTTAGCGTGGTATTTCTATGAAGGAGCAATGCTTCTCAAGCATATTGGTGGAAATCCTTTT  
GTTTCCTATAACA TTTC AAGTTTACTCATGCAGTGGGATTAGGCGGAGGGGTCTCT TTTCTTCTAACC  
GCAAGCTATAACA CAAAAT TTTACTTGAACA ACTAGAT TTTA ACTGAGTTGCTTGTAAAGTCT TTTGCATGA  
TATACTCCTTGGCCGATCGGGGTCTTCTAATTCAT TAAAGGCTCT TTTAATTGTGATTACGGAGG GAAA TA  
TGGTTCATTCTGTATAACAATTCATTGGCTCCAGAAGGT TTTAGCCAAGTCTCTATTCAACCAGTCAGAT  
TCCAACCAG CAAA AAAGTAATGATTGCGATAATGACTCTTTTTG CACTCACAGCCATTGCAGCAATAGTC  
CTTTCCATCGTTACAG TTTGTGGAGGG TTTCCTTTTCCTTCTGCTGCACTTAAACCCGTAACCTATTGGTG  
CATGCGTATCCTTGGCGATATTTA CTGTCATAGCTACAACGTTATTACTTCT TTTG TCTCCGTAATATCGA  
ACTCCTAGCCAGACCGCAAGTATTGACCCTCTCCACTCAATTCAGCCCAA CAAAACCTCAAGAATAGGTC  
GTCGCTCAGCA GAAA ATGAGCTGAACGAAGCGGGAAGACTCACTGATTAAGCACA TAAA GATAAGGCAAC  
GTTATGACGTA CTCTATGTCCGATATAGCACA CAAATTTGATA TTTCTAATCCCAGTCTCCCGCTCCAT  
CAAGAAAACGAGGATCC TTTC CCCCACAATCTCCTTCTGCCGTGGGCTCT TTTA GAGGGAGCTAA TTTCTC  
TACATGGGGGCCAGGCCCTTCTTCACTGTCCCTG TTTATCCACAACA ACTCGCTGCAATG CAAAACAAC  
CTTTTTA CATTG CAAA CAGAGG TTTC TGCTCTCAAG GAAA AAATAGTTTCACTAGTCTAGTACAGACACGCGGAT  
CTTTAGGACTCGGCCCGCAGTT TTTA GCGGCATGCTTAGTTGCTGCGACAATCCTTGCAGTAGCTGTTAT  
CGTACTTGTCTTCTTAGGGCTTGGCGGTGTTCTTCCCT TTTG TCTCG TTTG TCTGGCTGGGTCAACTAAT

GCAA TTTGGGCTATTGTGAGCGCCTCCATCACTACACTGATTTG TTGCG TTTC CATTGCCTGCATCTTCT  
TAG CAAAATGTGATAAGGGATCTGATCCT CAAAC TTTAATATGTAAGCTAATTTTGA AATTAGA TTTAATT  
CTAAAATTTCTT GAAATTAACAAT TAAATCTATTAGCATGCTTCT TTTCTGTAAA GGAAGCGGATCGTTG  
CGAGCCTTGCCTTT TTTGCTTAG TTTGCGTCGCGGAGAG GAAAAGCGAGCTCTATTA TTTCTTCTATTGG  
GGCTCATCTGGAGCGTCGCTGCTACGGTTCCCTTGCTCTGGGGGAGAGCCTGTTCTTAGAAGAAA TTGG  
AGCTGAGAAGCTGCC TTTGCCTA TTTGGGAGCATCCTTT TTTCTTTGCTTCA TTTCTGTGTTAATTCTC  
TATAACCTCTCTCGGAAGCGAGTCTCTC CAAAAGGCTCTC TTTCTTTCTGTTTCATATCTTGCCTTCTAATCT  
GCAACC TTTACCTTT TTTGGCATCTAGCCATACACAAGGGTGT TTTCTGGCACTCCGACT TTTCTCTATAG  
GATCCTTATATGGGGGCTGACAATTC TTTGTTATGCCAATTT TTTGGGG TTTA TAGATCAATTT TTTAAT  
ATCCAAGATGC CAAA CGTCATT TTTG CATT TTTA ATGCCATTACAT TTTGTGGAGATTT TTTA GGGGCAC  
GTATCGTCAACCAGATTCAGTATCTCGGAGCCGAGCTAATTTCTCTCGCTTTTA TTGTCGTAATTAC TTT  
CATATTCCTCTGGTACACTACAT TTTCATCGTCAC TAAAAGAGC TTTCAGAAGATCAGCATCTCTTCCTT  
GATACTGGCTATCCCCCTTCTAC CAAACAAAC TTTAAAGCTGTG TTTGAAGGATAAA TACACCT TTTACT  
TGGTTAGTT TTTAT TTTCTTATGCAGCTTCTTGTGCTATTACAGAGTTCAATTA TTTAAAATC TTTGA  
TGCACAG TTTGGAAA CGCTGAGACTTGTGAGTTAACAGAGAA TTTCTACTAAGTACTCCTCCTGGAT TTTCC  
TTAG GAAATATGTTT TTTGCCTTA TTTGCTTATAGCCGAGTAATCACAAGATTTG GAATCAATAACATCA  
TTCTCTTCGCTCCCATCTGCTTC TTTAGCCTATTCTGTTGTTGGTCAAT TAAAAC TTTCTGTCTTCATAGC  
AACAAATGGGAATGATCGCTAGAGAAGGGCTTGTCTTATGC TTTG GATGATAATAATCTACAGTTATTAATC  
TATGGCATCCCTAA TAAAATCC GAAATCAGGTGCGGATCGCGATAGAATCT TTTG TTGAGCCTGCGGGGA  
TGTTTCTGCGCACTACTATG TTTA TTCATCCCGCACC AATACGTACTCTGTATTATCATTTTC CGCCGT  
GTGTATTCT TTTAGCAATATTGCTACGCACTCACTATT CAAAAGCCATTCTTAGAAA TCTCTCTCTAGAA  
TCAATACATCGTAGACGTTCTATACGGAATGG TTTGCGGATATGAATGACACT GAAAACGCCAAGCTG  
AAA TCTTCTGCTAACGCAT TTTAAA AAACCCTCAAGAACGCAAC CAAATGTTTG CGTTCCAACACTTGT  
GAACC TAAAAAATCGCGCAGTACTCCCCAACCTACTTCTTCACATGAACAAGTTGGCTTATCAGG GAAA  
TTAAA AACCTGAATATGT TAAA AAATAGCGTATGGGC GAAA GATTTCTCTCACTCTCGA ACTAT TAAAAC  
GTTGGAGCAGCCTTCCCCAACATCCGACCATAGCAGCAGCTCTTCACCTCTAT TTTGTAGAGCATGACTT  
GCTTCATG TTTTCGATATTGCCGATGATC TTTA TGATCAGTCTGGAGACCGTCTA TTTACAGCTGTTCTC  
ATCGTAA GAAAACATAAGCCTGGTGGAGAATACCAAGCTCTTGCC GAAAACATCTCTCAGAAA TTCTAG  
AATCTGAGGATCCGAGTTAATAAT TAAAGGTC TTTCTATCTTAGCT TTTGGAAA GAAGCCCTT CAAACTT  
CCCTATTATCTCCCCTTCTTGACGCATCCTAATGAACAAGTAT TTTCTACAAGCCTGCTTATCTCTAGAA  
ACTTGTGCAGATAAA CAATATGCTCAATACGGGCGGACGGTCTCAATACACT GAAA AAGCAAAAAGACA  
CACAAGCTGCACAAGC TTTACTGAACACTCTAGCTGCCCTCTTGATGCATCCCTAGTCTATGAGTTCTGT  
TCTTGCCTCAGTTCAACT CAAA AATGTCTTACG CAAA CTAGCAGAAA CGATTCTAGCCTCTCTCC TAAA  
GAATGTATTCCAAT TTTAATTGAAA TGGTCGCGGATCATTCTCTACACAATAGCTGCCGATTATGGCAG  
CAAA GGC TTTGAGCCACATAGATAGTCGTCAAC TAAAACGTTTAGC TTTGAAAAT TTTAAA GTCTAAGGC  
TGCTAAA GC TTTA TCTACGACTACCA TAAAAC TTTA TCCAAAACGCTACCCTCGCTACGATCTCCAT  
CTGCTTATT GAAA GCTTGAAG CAAA TTACCAAGCTGAAGTCAAT TTTATGTTAGCCTT TTTA GCCATCG  
TCGGCTCATCAGATTATGCAGATGT TTTAATTAGATCTCTTACAGG GAAAAC TAAAAGCTAGAGCTCA  
AGC TTTA GAATCTCTA GAAA AAGATTGCGAGAACC ACTTGT TTA CTCTTGTACACCT TTTGTATATCGC  
GATAAGCATACTTCCGACGAGAAA TATTATAT GAAA AAAGGTGTGGAACCATTGGCTATTGAAGA ACTTC  
TGAATCGTCTCGAA CAAA CCCCTTTCT TTTCTAGTAAGCTTATAGCTCAGCAAC TAAAAGAAGAGC TTTCT  
TC TTTGCGATGCAGAGTTCTCTCTGCTCTACAAA GC TTTGCTAAGAAA CAAA AACCTCTATATTGTCC  
CGGAATACATAACTAGTTCCCTAGC TTTAAAATCCTTAGTAGGAGGGACTTCCCTGAACCTTATAGACAAA  
GCC TTTCTCCT GAAA AAAACTTTCT TTA TTTGCATCCTTAGACATGGATGT TTTGCTTTCTATAGCAGATA  
AATCTGAGGTCATGCTC TTTAAA GCTGGCTCT GAAATCT TTTCTGGAAGGGCAACCAAG TTTACGCCTATA  
TGTAATAGCAGAAGGATGTGTGAGAATT TTTGCAAAA AGAACCCACTATTAATGTACGACT TAAA CCTCTA  
GACTGC TTTGGGGAA GAAAGCTTTTCAATAATAAA GTTCGGGAATATTACGAGAAAGCATTACCCTAG  
T GAAAACGTTGATATTGAATAAA GGACAG TTTCTAAGCATTATCGAGGAATGTCTTCCGTTTC ATTGGT  
TCTCTTAGAGTCTACT CAAAACAGATAGTCT TTTCTGAGATCAATAAAA AAAACCCACAGTTACC TTTG GAT  
GGGAACGTGGGCC TAAA CTCTTTG TTGCAGAGAT TTTAGTTTGTGATGCTCTTGGATGTATTTAATCACG  
TCACCGACTGTGCGGAGTTGCTCGGCATCATCTTCA GAAATTTCAAAAG CAAATTTCTCTTCTAAA GTCA  
TAATCAACTCTGT CAAA TCCAAGCTGTCTGCA TTTAGATCTTCTAT GAAAAGAAGAGTCTAC TTTGACATC  
CTCAGGACTTACTCCGAGCTGATCAACTATAATTGCC TTTA CATCATCTTC TAAA CTATCTATGATCC

TTAC TTTCA TTTCAA ATGAAGCGCCTTCCATCTTAAGCAGACGGTCGACTTATGGCCATTTAAA ATGGG  
CCATTGGG TTTCTCGCAGAGTCTATAG CAAAAAAAATCTAGC TTTAAATAAAA ACTAGAGTAACCAATCCC  
TACAAGTCTACTC TTTGCGACATTTCTATGCGTAAGGGT TTTAGCATACTGAGCATCCTGCACAGCTACTA  
TATCTCGACTGTATATACAGCCAAC GAAATGCCTTC TAAAT CAAA AACTCAGAAGGGCTTAGGGCGAGAA  
GCA TAAA CCGCTCGCGAAGATAGAGAGGAAGTTACCAT GAAAAAAC TTAATT TTTCAAGATAACC TTTCC  
CCAACTACTTAAGCCATACCTCCGTCAACACT CAAA ACTTTGCCCTGTGATGTACGAAGATCCGTCAGAAG  
CTAAGAA CAAA GCGGCCTTAGCAA TTTCTTCAGGCATACCAACTCTTCC CAAA GGAACTCC TTTCAACCA  
CTCATT TTTCAA TTATCATTCAAGCTCTTGGTCATATCAGTATCTAT GAAA CCAGGAGCAATACAATTG  
ACTCGTATATTCTTACTTCCA ACTTC TTTGGATAACGC TTTA CTGAATCCAATAATTCCAGCCTTAGCTG  
CTGCATAATTGCTCTGACCTGGGCTTCTCTAAGTCCTACAATAGA ACTAATATTAATAATTGCCCCAGA  
TCTAGC TTTAATCATAGGTCTTATAACTGCTGAG CAAA CGTTGTATATAGA ACTAAGTTGGTGTAAATC  
ACCGAAGACCATTCTTCTCAGACATTCGCATAAGAAGAGCATCACGCGTAATCCCCGCATTGTAACTA  
TAAATCGATAGTGTATACTCC GAAAGAAA GTTCTGAACTTGTGCG GAAA CCATATCATTCTTGCTGAC  
ATCAACAAGAG CAAA GGATACTTGTCTTCCAG TTTG CTCAGAGAGAGTCTGAGCAGCCGCTGCCCGCT  
TCCCCATTAATTCCCCAGA TTTG GACATTAGCCCC TTGCTCAGCGAATAACTTCGCTATACTGAACCCTA  
TGCTCTAGA ACCGCCAGTCACAATTGCAGTCTTG TTTACCAATAAA CCACTCATTCACA ACTCCGACAA  
AAAT TTTCTATATCTTCCATAGACCC TAAATG TTTACAAGGGGA ACTCAGTCTATAGATCGGCTCAGCC  
CTGTGAGA ACATTCCCTGGACCCAGCTCAAGGAA TAAATCTAC TTTAGGATCAA TTTGAAA ACAG TTTG  
GTACCATAACGTTGGAGAAGTCA TTTG TCTGACCAT TAAAGAACGGATAGCCTCGCTCTCATACTAAC  
TCCCCTATTACATTAGAAG CAAA AGCTACATTAGAATC TTTAATTGCTAACTGGTACAGATAAGGAGCTA  
ATTGCTCCTGAGCAG TTTG CATAAGCGGTGTAT GAAA AGCTCCAGCAAC TTTAACATAACTACTTT TTT  
AGCCCC TAGTTCTCGAAGAATTACAGAAGCCTCTTCCACCTTA TTTCTAATCCCAGCAATTACGATCTGC  
TTGGGAGCATTGTAA TTTGCCACC CAAATCCCCCTCTCC TAAA GACTC CAAA GCAGGTAATACAACATCCG  
CAGTTAATCC TAAA ACTGCAGCCATTGCTCCCGAAGACTCTTCACAAGCAGCATTCATCAGCTCCGCTCT  
CTTTTG TACGATGCGAAGCCGCTTCTAAGCTAATACGTT TTTG ATGCTGT TAAA GCAGTATATTCGCC  
AAACTAAGGCCT GAAAC TAAA ATAGGCTC GAAA GGACAGTGTGTAGA TAAA ACTTC TAAA ACAG TAAAC  
TATGTAGATAAA TGGCTAACTGACTATTTCGATGTC TTTAATAGA ACTTCTTCAGTCCCTTCGAACATAAT  
AGAAGA TAAAGAAA ACCCTAGAAA CTCATCAGCCTGAGAAA ACAACCTTGCGACTTCCGAGGATTGTTGA  
TAGAGATCTCTCCCATGCCTACGAACTGGCTCCCTTGCCAGGGAACAATAAGCCACACGATCCATCA  
CACAGTCTCCTCTGTTACACTTGTG TAAA ATCACTGCTCCCCAAGATAAGCCTCCCC CAAA AGCTACTA  
ACAACAACCGCTCCGCAACATGGATATCATGTGTACGTAAGAGTTCGTC TAAA GCAATCCCCACAGAAGA  
GGCTGCTGTGTTACCATACTTAGCAAGAGT TTTAAA TACCCGAGAGTC TTTAACAG CAAA ACAG TTTGCA  
ATAGCATCGATAATACGCTCAT TTTGCCCTGATGAGGAACTAACCAATCTATATCTT TTTCTTGCAGCCAG  
CTTCTGTAAATGCAAGTCTTGGCAG CAAA CTCCATTCGTCGCACTGCGTGT TAAA CACTTC TTTA CCTTC  
CATAGTAAT GAAA TGTGATGATTCTGTACGGTATCCTGAGAAGCCGGACAACGACTACCTCCTGCTGGC  
AACCG TAAA AGATCTCCTTGT TTTCCATCCGCTCC TAAA TTCAC TTTAGAGAT TTTCTAAAGCTCCTGGTC  
TAGAATGACCAACAATACATGCAGACCTCCATCCCCGAATAACACACAAGTATTACGATCCTGATAGTT  
AA CAAA GGAAGACAA TTTG TCGGCCGCAATCACAAGCACACACTGATACATCCAGATTGCATATGCC  
TTGGCTATGGACAATCCG TAAAGAAA CCCTGTACACGCGGCCAAGCAAT CAAA GGCTGGAAT TTTCTTAA  
TTCC CAAA TAGGCTTGAGCTAAGGCAGCACTGGAAGG GAAA ATATAATCAGGCGCGGCAGTAGAAA ATAC  
AATACAGTCCACTTGACT TTTAGAGAT TTTAGCCGCTTCTATAGCCT TTTCTGCCGCCTTAGCCCCATA  
AAAGAC GAAA ACTCCTCAGCAGAAGCTATTCTACGCTCCTTGATTCCAGTTCAGTTC GAAATCCATTTCGT  
CAGAAG TTTCAACTATTT TTTCCAAA TCAGCG TTTGT CAAA AT TTTCTTAGG CAAA TACGAACCAGTTC  
CCAGATCGAAGCTCTCACATCTTT TTTCCACACGCACCCG CAAA CAAA AAGAAA AAACCAAGTATACTGCT  
AGGGAGG TTTATACCCTAACCTTTAT TTTGCATCTATCCTCATAATCGATTATCTAGGTGCTAGACC TAA  
ATAGGCT TAAA AGACATGT TAAA ATATCCTGATTACA TTTTCGAAA CTCATTTTCATT TTTAAAAAAGCTTC  
CAGGAATTGGCT TTTAAA TCAGCA GAAA AAATAGCT TTTGAATTATTAGAATGGGATCCATCT CAAA TTGA  
GGCTATGGCTCTAGCATTACAAGAGTTCCTCTACTTCGCATGCAACTTGCT CAAA CTGTT TTTGTTAAAA  
ATCTCT CAAA CTTCCTTGTAACT TTTG CAGTGAATCTCGAGATTCCTTCTTCTTATGTATCGTTGCAA  
CTCCTAAGGATGT TTTCCGCTCTGGAGAAATCTAAGATCTT CAAA GGGCACTA TTTCCGT TTTAG GAAA CT  
ACTTTCTCCCATCACTG GAAA GCAT TTTG TCTTTGGAAA AATTAGCTATTCTTAAGCAGCGAATTGAAGCT  
TGTTCCCC TAAAGAAA TGATCATAGCTCTTGACGCAAC TTTG GAAGGAGATGCAACTGCATTGTT TTTGA  
AA CAAGAAT TTTCTTACCTTCCAA TAAA AATCTCTAGATTAGCTCTTGAATGCCGTGCTGCTCTCTCT

TGATTTTGTGTTGATGCTAATACTTTAGCTCGAGCTTTTCAGGAA GAAATTGCTTTTAAGCACCTCTCAA  
AAGC GAAACTGTTTTTCAAAAAAGACC TTTGGAGTATA TTTGAGGCGGTTTATCTAGTTTTTGCTAGTG  
ACCAGCACCCCTCTGAGTTCTCCCCGAACCTGCTAGAGGGGTGCTTTTCGGGCTTTT TTTCTGTTGTT  
TCAAA GTTCTCTCTGTTCTCTTTTC TTCCTATA TTTGTAGGGCTAGT CAAATTATCCTCGATTCTCTATT  
GTAATTGGATAGGTCTTGAGTAGTCTCTTCTAATATGTGGGGACGCCTATGAGATTGGCTTCTGACCAA  
ATAAGAATGGTGTCTTCCCA GAAA GAGTAAGAA TAAA ACTTTCATCCCTAGCGCAGACT TTTCTAGATAA  
AGGAAGTAATAATGCTTGGAATACG CAAAAAACGATTCTGCAACTCGCTGT TTTACTGTTGCTCACCTT  
TTC CAAA GTTC TTTCTGTTCAACTTCAGAAGGACGTATGGTCGTAGAGTCTATCACCATTACGACTCAA  
GGAGAGAATACT CAAAATAAACGAGCTATTCC TAAAATAAAAA CAAA GCAAGGGACGTTGTTCTCTCAAG  
CAGAT TTTGATGAAGATCTAAGAACAC TTTTCGAAA AAT TTTGATCGAGTAGAGCCTATCGTAGAG TTTTCG  
TAATGGACAAGCTGTGATCTCTCTGATTCTGACGG CAAAACCTGTTATCAGAGAGATCAATA TTTTCAGGA  
AATGAAGCTATCCCACTCATAAAATTCTGAAAAC TTTAGAGCTTTATAAAAAATGATCTTTTTGATCGGG  
AATTATTC TTTAAA AAT TTTGATGCGCTAAGAACTCTTTATTTGAAA CGAGGGTACTACGATTCTCAACT  
CTCCTATTCTCATAATCATAATGAGAAAGAGGGC TTTATCGATA TTTCCATCGAGAT TAAA GAAGGACGT  
CACGGTCGCATAAAA AAAATTAACGA TTTTCGGGAATTACGCGAACAGAAGCATCAGACTTAGGTGACATTG  
TTTTAAC TAAA CAATACTCCACAACAACGAGCTGGTTCCTGTTGCGGAGTGTATCATCCGGACATGGT  
AGAGCAAGACTTAT TTTGCTATCA CAAATTACTTC CAAAATAAAGGATATGCTGATGC TAAAGTAAGCAA  
GAGGTCCTACAGATGC TAAAGGAAA CATTAC TTTGCTTATCGTTGTAGACAAA GGACC TTTATACACAT  
TAGGTCACGTACATATAGAAGGATTCACAGCGTTATC CAAAAGACTGCTCGATAAAA CAACTATTGGTTGG  
ACCTAACTCCTTATATTGCCAGATAAAA TTTGACTGGAGCA CAAAAGATTTCGTAGCGCATACGCTAGA  
TATGGCTACGTGAACACTAACGTTGATGTCTCCTTCTCAGCGCACCCCACTCTACCTG TTTACGATGTTA  
CCTATCGAGTGAGTGAAGGATCTCCCTA CAAAATCGGGTTAAT TAAAAT CAAA GGAACACTCATACTAA  
GCATGATGTGAT TTTGCATGAGACTAGTCTTTTT CCTGGAGACACT TTTGATAGAT TAAA ACTAGAAGAT  
ACAGAGACTCG TTTACGCAACACCGGCTACT TTTAAA AGTGTAAAGTGTCTATACGTTTCGTTCCCAATTAG  
ATCCTCTCGATTCTAACGACC TTTATCGAGATGT TTTTCATTGAAGT CAAAGAGACT GAAACAG GAAATCT  
TGGGCTATTCTTAGGATTCAGCTCCATTGACCAT TTTATTTGAGGAGCAGAAA ATTGCAGAAA GCAACTTT  
GATTTATTTGAGCCC GAAAC TTTCT CAAAAAAGGATT CAAATC TTTAAGAGGTGGTGGAGAATACCTCT  
TCC TAAAAGCTAA TTTAGGAGATAAGGTCACCGATTACACTGTTAAA TGGAC GAAAC CACACTTCT TAAA  
TACCCCTTGATTCTTGAGTAGAATTAGATAAAA TCAATTAATAAAGC TTTAT CAAAAGACTACTCTGTG  
GATACCTATGGAGGGAATATCAGTACCACCTACATTCTTAACGATAAGT TAAAATATGGGATGTATTACC  
GTGGTAGC CAAA CAAGCTTAAG TTTGCG CAAAAAACGTCCAGCTCTAATAGACTTGGACCAGATTTAGA  
CAGTAA TAAAGGATTCG TTTCCG CAGCGGACTCAATGTTCTCTATGATTCTATTGATAATCCTAGAAAA  
CCTACTATGGGAATCCG CAGCTCCT TAAA CTTTGAATTATCTGG TTTAGGCGGAACTTACCAATTTACTA  
AACTAACAGCTAGTGGTTCTATCTATCGTTATTAAC TAAAAAAGGTGT TTTGAAA GTCCGTGCAGAAGC  
TAAG TTTAT CAAA CC TTTCCGGAACAACAACCTGCACAAGGCATTCTGT CAGCGAACGGTCTTCTTAGGA  
GGT GAAA CCACTGTTCCGGTTA CAAA CCTTTTA TTATTGGACCGAAGT TTTCTCCTACTGAACCACAAG  
GAGGCTGTCTTCCCTACTATTAACAGAAGAA TTTCAATATCC TTTGATTTCTCAACCTTGCATTAATGC  
CTTTGTATTTCTAGATTCCGGATTCATTGGGATAGAAGAGCACACTATTCCGCT GAAAGACC TTTGCAGT  
AGCGCTGGATTTGGTCTACGC TTTGATATGATGAATAATGTGCCAATTATGCTAGGCTGGGGTTGGCCGT  
TCCGCCAACAGAAA TCCTCAATAAT GAAAAAATTGATGTATCT CAAAGATTCTTC TTTGCCTTGGGAGG  
AGTATTCTAGAATCC GAAAGGAGAAGGAGAGCATCCTTCTCC TTTACCTATTGGTATTTTTTA TAGGAA  
AGAATTAT GAAA AAGTTCTTATTACTTAGCTTAATGTC TTTGTCATCTCTACCTACA TTTGCAGCTAATT  
CTACAGGCACAATTGGAATCGTTAA TTTACGTGCTGCCTAGAAGAGTCTGCTCTTGG GAAAAAAGAATC  
TGCTGAATTC GAAA AGAT GAAA AACCAATTCTCTAACAGCATGGGGAAGATGGAGGAAGAACTGTCTTCT  
ATCTATTCGAAGCTCCAAGACGACGATTACATGGAAGGTCTATCCGAGACCGCAGCTGCCGAATTAAGAA  
AAAAATTCGAAGATCTATCTGCAGAATACAACACAGCTCAAGGGCAGTATTAC CAAATAT TAAA CCAAG  
TAATCTCAAGCGCATG CAAAAGATTATGGAAGAAGT GAAAAAAGCTTCT GAAA CTGTGCGTATTCAAGAA  
GGCTGTGTCAGTCTTCTTAACGAAGATATTGCTTATCTATCGATAGTTCGGCAGATAAAA ACCGATGCTG  
TTAT TAAA GTTCTTGATGATTCT TTTCAAAAATAATTAACATGCGAAGCTAGCCGAGGAGTGCCGTATGTC  
TCAATCCACTTATTCTCTTGAACAATTAGCTGATTT TTTGAAA GTCGAG TTTCAAG GAAATGGAGCTACT  
CTTC TTTCCGGAGTTGAAGAGATCGAGGAAG CAAA AACGGCACACATCACATTCTTAGATAAT GAAA AAT  
ATGC TAAA CATT TAAA ATCATCGGAAGCTGGCGCTATCATCATATCTCGAACACAG TTTCAAAAATATCG  
AGACTTGAA TAAA AAC TTTCTTATCACTTCTGAGTCTCCTTCCCTAGTT TTTCAAA AGTGTTTA GAATTA

TTCATTACTCCTGTTGACTCAGGATTCCCAGGTATTCATCCGACAGCCGTTATCCATCCAACCTGCGATTA  
TTGAAGATCATGTTTGATTGAGCCCTATGCTGTAGTTGTCAGCATGCTCATGTTGGATCTGCTTGCCA  
TATTGGGTCCGGTAGCGTCATTGGAGCTTATTCAACCGTTGGACAACACTCTTATATCCATCCTCGAGTA  
GTTATTAGAGAACGAGTCTCTATTGGGAAACGAGTAATTATTCAACCAGGAGCTGTTATAGGCTCTTG  
GGTTCGGGTATGTTACTAGTGCTTTTGACAGCACAACATTTAAAACACCTCGGGAAAGTCATTATTGA  
AGACGACGTAGAGATCGGCGCAAAATACAATATCGACAGAGGCCGGTTTAAACACAGTGTGTGCGTGAA  
GGTTCGAAAATTGATAATCTTGTCAAAATTGCCATCAGGTGGAGTCCGGTCAACACAGCATGATTGTAG  
CTCAAGCTGGAATTGCAGGTTCTACAAAGATTGGCAATCATGTAATTATCGGTGGACAAGCCGGCATAAC  
CGGACATATTTGCAATTGCAGATCATGTATTATGATGGCTCAGACTGGCGTCACATAATCTATTACTTCT  
CCAGGGATCTATGGCGGAGCGCCTGCTCGTCCATATCAAATAATTCATCGCCAAGTAGCAAAAGTACGCA  
ACCTTCCACGACTCGAAGAACGTATCGCAGCACTTGAATACTAGTCCAATAAGACTCTCTCAGA  
ACAACATTAATTTAATTGAGCTGTCTCTGATGTAAATTGGATATGCCTGCAAAAGGCTTACAGAGAGCT  
CTTTTTCAGCAATAATACCTTAATAAGCTTTTCGCGATAATTTTCGCGACACACTCTCCCTGTAGAGA  
CTAGATGCAATAAACGCTTCTCGCTAAAATTGAAATTCAGCTAACGACGAGAACGTGAAACGCTCCTCCC  
TTTATGTTAGGGTTTCTATAGCCATTTTCATCATCATGGAAAATATGGCTCCCAGAGAATCTTAAA  
CAAGATCTATCTATGTTACTGACAAGGCTGCTATGGTCCCCATAAGATCATAGTTAACGAAATAGGATTTAA  
CATCCCCTTCTTGAGTAGAAGAATGAAACACCTCTCCTTGAACAAATTTGTGATTTCTGAAGCCCTCGACA  
CAATTCGGAATACTGTTTGTATCTAAAATCTAAAATTTCTTATAACATCAGAGCAATAGACACTTTTCGT  
TCTTTTAAGAAAATGCCAACAGCTTCTCCAAGTTGAAAAAATTTCTTTCTCTTGAAGAGGTGCCCGAT  
TGATGTATGAACAATAGGCTGCGAGCGATAGGAAACCGTTGTAGCTATCAATACGGGAACAGGTCTTGC  
CTTATTCACCTGATAATAATATCTATCGAACGATTCAAAGGTCCGGCAGAAAAATAATACCGCCCAAC  
TCCCCTTTCTCAAAGCAAAGAAAACTTTAAGAAATCTTCCCATTCATAATCAAAGGAGGCGTATAGA  
AAAACAGTTGTGCTAACTGTTGTCAAAAGACTTTAAAGAGGAGAAATAATCACTAATATCTCGTAATTC  
TTCTTCGGAACAAGGAAAGTTCCCGTATGCTTTAATGGTGTGCTGCTGCACCGAGATTTTCGGGCTGTTGA  
GGACAAAACATTTGATTCTTTTCGCGATAGCTAAAAGTTTTCCTAATTTTAATTCTTATCTTGCT  
CTCTTTCTTCAAAGATTGTTTATTTCTCCAGCGACTTCCGATAATCCGCCTACATTAGGAATCCCTCG  
AGGTAGGATAACCAAAGAAAGAATCACTATGAACTCCACACAAATAAAATTTTGTAGCGGATATTGTATT  
TTTTTATCTGTTAAAATGCAACAAAGAACTCTATAGAAAACCCCTTATAAGGCCTTCTGAACAAGGAA  
AATGAAATTTCAAACCTCAAACCAACTTCATCTCTATCCATTTTCTGGGTAGTGCCGAAAAGTTTTTT  
TTTGTAGCATAGACTTGGCGCCAGCAGTATATATTATAATTTGCGAAGGCCGGACCCTTTCGGTTACTTT  
TTCGCGCCGGCCTTGCATAGCCAGAGTGAATTTCAAAGATTTTATTTGAAAGACATTTCTAGAATTTTCA  
GGAACCTTTTATCCAAGAGAATCTATGCATCCTCTGACTCTCAACATAGCTTCTGAGGAACTACAGAAG  
CCCGAGTTTTCATGTTATTGAAACTTCGAAATGCTTTCTGCATTGACCTTTTGAAAAAATGCTACT  
CATTCGCGAATTTGAGATTTCGCGGAGAAGAGGCCATATTAGAAAGCCCTTGTGGAGGATTTTATCACTCT  
TATATCGGTCAAGAAGCTGTTGCTACAGCAGCTATTGCTTGCACAGGAAAAGACCCTGGTTTTTTCCT  
CTTATCGTTGTACGGAGTAGCTCTGCTGCTGGATATCCCTTTACGACAACCTGGCAGCAGAACCTCTAGG  
GAAAGAAAACAGGTGTCTTTTAGGACGAGGCGGATCTATGCATATGTGTGGTGATCGTCTTCTGGAGGT  
TTTGTATCGTTGGTGGACAAAATCTCTGGCTGCAGGTGCAGCATTTTCTATGAAGTACAAAACATCAT  
CTTCTATATCTATGTGTTTATTTGAGATGGAGCTGTAGCTCAAGGAGTCTTTCATGAAACATTAATTT  
TGTAGCGCTTCACTCCCTTCCCTTAATGCTCATTATTGAAAACAATGGATGGAGTATGGGAACAGCCTTA  
CATAGAGCCATTGCTAAAACAGCCTATAGCAGAATCCCAAGCGATTTCTTATGGTCTTTCTTTCGATCAC  
TTGAATGGATTGCAATTTATTTAATTCGCTTATAGGATTTAGAGAAGCTTATCACCACATGCAAACAAAG  
TTCTCTATTATCGTAGAGGCGCTATGTTCTCGAATTTAGAGGACACTCTATTTCCGATCCTAAATTTATAT  
CGCTCAAAGAGGAAATGCAATGTCTTCTCAAAGAGATCCTATCCTTTTTCGAAAAGAATGGCTCATTC  
GTGCGAATGTCTATCCGAAGATGATTTTAAAGATTTGCGTCAAAACAGCAAAACAGCTGTCTTAGAAGC  
AGTCGCTCAAGCTCGTCTTGATCCAGAACCAGCTGTAGCTACTTTAGAAGAGGGGGTCTATGCCTAATTT  
TGTTACACTCGAAAATCCGAGAGGCTATTAGACAAGCTATTGATGAAATAATGACCAGAGATCCTAACGTC  
TGTATCCTAGGAGAGGAGGTGCTGAATATAATGGTGCTTATAAAGTTACTAAAACCTCTTAGATAAAT  
GGGACCCACTCGAGTTATTGATACACCATTAGCGAAGCTGCTTTCTCTGGAATTTGGAATCGGAGCAGC  
GCTAACGGACTTCGCCCAATTATTGAAATTTATGAGCTGGAACCTTCTCTAGTTGCTGCTGATCAAAATC  
ATTTCTCATGCAGCAAAATGTATTATGACTGGAGGAAATTTGCTGTGCTATCGTTTTTATGAGGCG  
CTAATGGAGCTGCTGCGCAAGTCTCTTGCCAACATTTCTATTGTGTTGAAGCTCTTTATGCCAATATTCC  
TGGCTTAATTGTCAATTGCTCCATCAACTCCAGCCGATGCAAAAGGACTTCTTAAATCTGCTATTCGGGAT



ACAACCCCGTTCTATTCTTAGAAAATGAATTAGACTACAATCTTAAGGGAGAGGTCCTTCAGAAGAAT  
ACCTGATCCCCATTGGGAAAAGCTCGTATCGTTCAAGAAGGAAAAGATTTAACAATCATTTTCGCATAGCCG  
CATGGTTTTCATATCGTTGAGCAAGCTGC TAAAACAGCAAAACAACGATGGGGACTCTCTATTGAAAACATT  
GACTTACGAACGATCAAACCTTTA GATGTTGCCACTCTCCTCACTTCTGTCAAAAACAGGGGAATTGTC  
TTGTCGTTGAAGAAGGGCATTATT TTTGTTGGTATATCTGCGGAAGTGATTACGACGATTACAGAACATAT  
TTTACTACCTAGATCATCCTCCTCTACGAGTCTGTCAAAAAGAAAACGCTATGCCATATAA TAAAACCT  
CTAGAGATGGCGACTCTCCCAAAATATTAACCGCATCCTGGATGCCATTGAAAAAATATGAGGTAACGTT  
GTGGTTTCTTTGT TAAAATGCCTAAGCTCTCCCTACAATGGAAAATAGGGATTCTTGT TAAAATGGCACA  
AAAAAGCTGGGGATGAAAATTCATTTTCGGGGATGTATTACTAGAAAATCTCTACTGATAAAGCTGT TTTAGA  
ACATACAGCTTCTGAAGATGGTTGGTTATTAGAAAATCTTGT TAAAAGGAAGCAAAACTCCTATTGGC  
ACTCCTATCGCTGTATTTTCAACAGAA CAAAATGCTCAATATGATTTAAAACAGCTCCTACC TTTGGAAG  
AAAATGTTGTTACAGATGCAGCTACAGAAGCATCGC CAAAAGACTCTGCTCAAA CAGATTCTCAATACAC  
AAGTGGCCCTTCCATAACTATGATGGGATTCCGTCCGGAACCACC TTTAGCTACTCCTCTAACTAT TAAA  
CATTCCAACGATCCAGTATTAGCTTCTCC TTTAGCAAAAAAATTGGC CAAAAGAG CAAAATCTAGACCTCT  
CTGGAGTAACTGGTAGTGACCTGGAGGACGGATCA TAAAGAAAAGATTTGGAAAAGCTCCTCC TTTAAG  
AATTGCTGGGTTTG GTTACCCTGAAGCTC CAAAATGTTAATCCGGGATCTTATATAGAAGAACCCTC TTTCC  
CCTGTTGAGAAGTCATATC TAAAATGCTGCAAGCTGC TAAAACC TTTATTCTCACT TTTATGTAAGGC  
AGCGCATTTTACGCTTCCCCCTTCTTGCAATTAT TAAAAGAAGCTTCAAGAACAAAATATTAAGCTCTCTAT  
CAATGATTGTATTGTACGAGCCTGTGCTTTTAGCTCT GAAAAGAAATCCAGAAAATTAATTCTGGATTCAAT  
AGTGTCGACAATAAGATTATTCCGT TTTCTACGATTGATATCTCTATTGCTGTAGCTATTCTGATGGAG  
TTATCACTCCTATTGTCCGCTGTGCTGATAGAAAATATTTGGTATGATCTCTGCAGAAAAT CAAAAGGACT  
TGCAAC TAAAGC CAAAAGCAGCTCTTGCAGAAGAAGATA CAAAAGGAGGTTCTTTCTGTGTATCTAAT  
CTTGGTATGACAGGGATCTCTGAT TTTCACTGCTAT TTTGAATCCTCCACAAGCTGCTATTCTAGCTGTAG  
GAAGCGTAGAGGAACAACCTGTAGTCT TAAAATGGAGAGCTAGCTGTAGGCTCGACCTGTATGTTGACATT  
GTCGGTAGACCACAGAGTGATTGATGGATATCCTGCAGCCATGTTTCAT GAAACGACTGCAGAGACTCCTC  
GAAGCTCCTTCTGT TTTACTTCTCAAT TAAAAGAAAGGAAATG TTTCCCTTCTTTCTTCTAAGAAGTTGGTC  
GGGAAAATTC CAAAATATTCGATGCATACTCAGCGATTGATCTATCGCTT GAAAAGAACCTATCCCCC  
TACATTGTAAAATAGACTTCTTCCGTCCTCCTCAGGTTGCTTGAATAAGCTTGCACACGGTTCTGTGTA  
TTTATATAGGCTTC CAAAATCTGCAAGAACAAAAGAAATGGATCTCCCTCATTTTAAAAGTCGGTTTACAATAG  
GTTTAAAATAGTCTTATCTTCTTGAGAAAATTTGGCTTGCAGCAATCATATCAAGAA TTTCTTGAATTGT  
TGGATT TTTGCGTTACAGATGCCTTGAGGATAGTATTC TTTGCGTAGCTCAGAGATTTCTCTCTAGAAGA  
C CAAAATGAACATATGCTCTTTCCGATATGTTCCAGCCATTTTCGATATTGGCACCATCCCATAGTCCAA  
TTGTCAAGGCTCCGTTCAAAGCAAATTCATATTCCTGTCCAGAACCTCCATTCGGGCTGTT GAAAT  
TTGCTCAGATAAAAATCGGTTGCAGGAATGATAGCTTCTGC TAAAGAAAATCTGTAA TTTGGC CAAAAGATG  
ACTTTTAGCTGATCGTTCACTTTTAGGATCATTATTAACAACAGCTGCTACATTATTAATCAAT TTTATGA  
TCAGCTTGGCCATAGCATAGCCAGGAGCCGCTTTTACCCTC CAAAATGACCGTTGTCCGGAACAATCTCTCC  
AGATCCATTACGGA TTTCAATTAT TAAAAT TAAATCAGCGGAGAATATTCATAAGTTGACGTTTATACTCA  
TGTATCCGCTTAATATGGCAAT CAAAATGGACTGAGGATTTA CAGTGACCCCAAGTTC TTTATAAAATTC  
GAGCTGCTAGTTCCCT TTTATTCTGGAT TTTAATATTACGCCACTCTTCCCTGAACCCACTATCTTCAGC  
TAAAAGAAATTACCTTATGTAGATGCGTGAGATTCTGT TAAATATTCTGTGCCTATCGTTCCGGTTCAATAAC  
GAACTTAACTTTTTATTG GAAAAGACCAACCAACGCTAGGTGTAATCCCATTAGTGACATTGA TAAATT  
TATCCGGGAAAAACTCAACAAAATCCT TAAATAGAGTACTTTTATAAGTTGCGAAT GAAAAGTGGATAC  
TCCA TTTACCTTATTCGTTCCAACAACCTGCTAGA TTTGCCATA TTTACAAATTTAGA ACTTCCCTCCTCG  
ATAATAGAAAAGAGCTCGACGCTTATCATTATCTCCAGGATA TTTCTGCGATACT TTTGCTAGCCAACGTG  
CATTAATTTTCATAAAATA TTTCTAAAATGACGAGGAAGAACCCTTA GAAAATAAAATC TAAAGACCATCTCTC  
TAATGCTTCAGGAAGAATCGTATGATTAGTATAAT TGAATATT TTTGTTGGTTGCATCCAGGCAACATCC  
CAATCCAGCTCTTCACGATCAACTAA TAAACGCATCA TTTCTGCAATGCC TAAAAGCTGGATGCGTATCAT  
TCAGCTGAACTGAGACTTT TTTACAGACAA TTTATCTAGAGATAAAAATGTT TTTAGTATAACGACGCAGAAT  
ATCTTGTATCGTAGCAGATACAAG GAAAATCTCTTGTCTCAGACGTAACCTTGTCTTCA GAAAATAGAA  
TCATTGGGATAAAATGACGCGAGTGATA TTTCTGCTAGAGCTATATCTTCGATAGCTCGAATGTAATTCC  
CGTGGT TAAAATAAC TAAAAT CAAAATCCATGACGCGATTGTGCTTGCACAAGCG TAAAAGAAATCACTGT  
ATCATTATT GAAAATCTGGAACAGGAACATCATAAGCCATAGC TAAAATCTCCTGGGAATCCACTAACTCT  
GCAACATCCCTACCTCTTGAGTCGATGCTATGC TTTACCTTCCCA TAAAATGTACGGGATATAAGTATT

CTCCTCGA CAAATCTCCCAAGGATTTTCATAACGCAACCATTTCATCGGGGACTCGACTTGAAAACCATT  
CTCTATCTTCTGATCGAAAATACCGTAATCGTAACGAAGGCCATACCCATAAGCTGGAATCTCTAGTGTT  
GCCATAGAATCAA GAAAACATGCCGCAAGTCGACCTAATCCCCATTACCGAGACCCGCATCATGTTCCA  
TTTCTACCAGTTGATCGAAATCGTAGCC CAAAT CAAAAGAGGGCTTC TTTTAC TAAA TCTAGAAGACCTAA  
GTT CAAAAGATTACTTTTAAA CTCTCCCTAG CAAA AATTCCATGGATATGTAGTACACTCGT TTTACA  
TCGTTATCATAATAACTGCTTTGTGTC TTTA ACCACCC TTTA GCCATCCATTC CAAA ACAGT TTTAGCAA  
CGGCTA TAAAAATATCTCTGGTTGATGCCGATTGAGGAGTCTGGACTACCCACAATATACCC TTTGAG  
GATAGCTTGCTTCATAGATTCAACATTGATCTTTGTCCGATCGAAA TACATAGAGGCTTCTCATGTAAAG  
AG TTTGTTTGCTTGTGAATAA GAAA TATTAATAT TAAA GAAA GA TTTCTATTCTCAACAGACGATACTG  
CAGAGGGTCTTGATATTCGG TAAAAAATCAAG TAAA ATGTTTCGCC TTT TTTA GTTAAGGAGGC TTTA TGG  
GTAT CAAA CCTCATGATTATGGCTGTTGGGGAAGTAGAGGGAACGTC TTTA CCTTACAAGATCTGAATAC  
GCAGCAAG CAAA TCAGAGCGCCGCTGCTTCTTCTCTCTGTTTC TAAA GTCGGAATGTGCAG CAAA AGTT  
GCTCGCTATGCACTAGGATTCCCTC TTTGGACTAGGA TTTATCC TTTCTATTGTTACATTTA TTGCGGCAG  
CTGCAACTCTGCCTCTCGAACTACAACGATTCTTATTATGGTTACC CAAA TAGCT TTTG CAGCCGCTCT  
CGCC TTTAAAC TTTA TGACCTATTCAAGCACGACGTGCCTACTTGTTCGATTACTT CAAAGGCGTAGTAT  
AATTCCC GAACGGTGTACAAGGAGGCGGCGCAATTGCCTGCCTCTACCTCTAGTCTTCTA TAAAACTA  
AACC TTTGATAAGCTGAT GAAAGTCGC TTTG TTAATTC TTTGATCGCACA GAAA CATCGCACTCTCTATC  
ATCTTCTTCTAGTT TTTGCGAGATAGCTCGAATGGAA GAAATCACTGTAGAGTGGTCTCGAGAGAACACT  
TCCCCAATT TTTA CATATGACAAA GAAAGCTTCTGTCTACACAAA AACATGGCGACCTGCCTAGG TAAAA  
CATATTCTCTGGACTGAGAACGACCTAGAACAC TTTCCGGAGAAA CGCCATAATATTGAGCTGTAGCACG  
AACAAATACCGGATGGAGT TAAA CGAATACTCTCGGCAGCCTGCAATACATCATGTAA TAAA GCCTCTATG  
TCTCCTTGA TAAA GCA TTTGATGT GAAAGCTT TTTA TAAGCAACTCGTTAGC TAAA GTTGTTAATGCGT  
GTAA CAAAGACTTCACATGGGATGATAGAGCCTGAATTA GAAA ATC TAAAGCAGTCTCCTCTATACGAAT  
ATTAGTT TTTCTATTCTTCTTTCTAAA AACTTT TTAATCCTTCTCTTGT TAAA GGACTAACGGGAATC  
GAAATCCCCACT CAAAGCGACTAATTAATCGTTCTTCCATAGCC TTTAAA TCTCCTGGAG CAAA GGTAG  
AAGAAA TCACGATCAACTTGCCCTTCTGTATGCAACGAATTGAATGTGTGGAAGA ACTCTTCTTGAGTAGC  
TCC TTTACCTGAGAGCACTTCTATGTCTTCAATGAACAGAGCTTCTACATTACGA TAAAACGCTCG GAAA  
CGCTGCATCTCACCAGAACGAATAGCTGACACCAGGTGTTCCG TAAA TAGCTCTGATGTAACATACAGAG  
TT TTTA CACCAGCTTCACGAAGTCTCCACAGCAGCCTGCATCAGATGTGTT TTTCCGGAGC TTTCAGG  
ACC AAA CAGATAAA TAGGGT TAAA AG GAAA ACC TTTGCCTTGTTCAGAAACCTTAG CAAATTCCTGAAGA  
ATTCTTACAGGTAGATCATTCTCCGGAGTCACAAGAAA ATTAG CAAA AGACATGTTCCGGATCAATGTCCC  
CATACTCATAGTGAAGTATGCAGTCT TTTCTTGTGGATCTGAGTATCCT TAAA CGGTGTAGAT TTTATC  
TAGGGAAGTCACGCGCAGCAATGGCTTCCATTATTATTAAT TAAA CTAGCT TTTA ACTTTA TGACGA  
ATATGCTCTTCGAACCAAGTTACTT GAAA AGAATC TTTTCGCTTC CAAATATAAGTTGCACGCAT CAAAGC  
ATAGGACCTTCAAGGACCTCAGCCAT TTTATTGACGGTATCCACTCCA TTTCTTTTCTTGAAG CAAAAG  
GAACTCTTCCCAAGCTCGCAT TAAA ACTATCTCAGC TAAA TAGT TTTGATAAAA CTATTCTAAT TAAAAA  
CAGTACTACTTACCT TTTCCGGTATCTCTATCTCTTCTATTGATAATTACTTCATGCTGCAGATGTTGT  
TCATC TAAAAT TTTGTTTGTTACCCATTGTTGGATAACTCCTAGTAACATAGAAGAGAACCAG TAAA TAT  
TTAACCCAGAAGG GAAA TTATAAAA ACAT GAAAG TAAA TAACAACGCCATCATTGTTCCCATAGCTTCTTG  
CTGACGTTGTTGATCTGACGCAGGACCAGATCG TTTACAGCA GAAAT TTTCTGCTGAG CAAA CATGACT  
ACACCTAG CAAA ATAGGAAGAAGATGGAACCT TTTCCGATAAAA CCATATAGGTG TTTCCCAA GAAAAGA  
GAACATCAGGAGCTGTCAAGTTATCTATCCATCCAGGATAAAA GCTAGCTCCCC TTAATAGAAA CGATGA  
CTTCAA TAAATCGAACATCGCTAT CAAA AATGGAA TTTGTATAAG CAAAGGAAGACAACCCGTTATCGGA  
TTAAC TTTATTTCATCTTATA CAAA GCCATAA TTTCCATTTGAGCTCGCTTAGGCTCACGCTTATA TTTCT  
GCTGAATCTCCTGAATATAAGGA GAAAGCTTTTG CATAACGACGCATAGACCCGGATAGACCAAGCATT CAA  
AGGATAGAG TAAA AGCTTCAGTACGATCGTTAATAAGATAATA GAAA TTCCCAAGAGCCTGTGAGGAAT  
TTAAA GAA TTTCA TTATGA CAAA TAATAATGCTG CAAA AGGCTCAGTTA TAAAAC TAAAGAACCCTCTGA  
AAGCAATCGCATCAATATACTCAGGAG TTTCTCC TTTA GAATTCGCGTTAGCTCTATC TAAA GT TTTTAA  
AGTAGGGTCCGCTAGAGGCCCTGCATATACCA TAAA TTGATAACGCCAGCTTCC TTAGG CAAA GG TAGC  
ATTGCCGTATAGCCAGGATAT TTTG AAGCAGGATAAGCTTGATC TTTCCGAGGAAGTTGA GAAA GCCGTG  
TAGGAACTACATTCCCTGGAAT TAAA AGAAGAAGCATAGCCGCTGGAATAGGAGTTCGAGGGGTTAGAAT  
TACCC CAAAGTACCCATTAGAATT CAAA ATCCATTGAGGAGTTGCGTTGTTCCGTACCAG CAAA GAATCC  
TTAGC TTTAGGTAAT TTTACAT TAAA GAGATCACTCTTATT TTTCTTACAGCGTGATACTTCACAGCTG

GAA CAAA AGCGTTGGACATAATCTCAACTTCTGGAACGCCAGATGTGATCCA CAAA TCTTCTCGTCCTTG  
AGTAG TTTGAATCTCTAACT CAAA GGCCTAAGGCTGCTCTCCAGCGAGTAGGTT TTTCTAATTCACCA  
TCCCCGCTCTCT AAAA AT TAAAGT TTTA TTATCGAAT GAAACAACAC GAAAGCCGGTAGCAACAGGAGAAG  
CCAATCTCTTCTCT GAAACAATA TTTAAA GCTTGATATTGTGCAGGCACTCTCTT TTTAACATCAGATAG  
CGTTCACGTCTGAG TAAAGGATAATAGCCTCCACAACAT TTTG CTATGTT TTTGACGTTGAGAATCGATA  
G TTTT CACTCCGGG GAAA GAGGCTTCTGAAGGAGAGTTAATTGCTAACTCTCTAT CAAA CCAATCTCAT  
TAACAATACT TTTA TTCTCTTCTTGATCAGAAG CAAA AGGAAGATTAATTCCCTCGATAGCTCCAC TTTT  
TTGAGAAA CTACAA TTTG CATGTATTCATTGGAGAGCATGTAGTAGCTACCAGATGCTGTAGGAT TTTTCT  
TTA TCAG CAAA GACTACAGCCCCTGCCATAGGGAGATC TAAA GACTCAACACACTCTTC TTTA GAATTAT  
AAA TACC TAAA GGTA CAAA TTCATTCCCGGTATTGA GAAAACTAATGATGTGCCGTAGATAGCGCCCGC  
TTTA TTCGCAATCTTCCATCCTTATATTCTCCTAG GAAA ACAAGAGGCTCCTGATTGCTAC GAAA TTCT  
GCTAC TAAA ACCGG GAAA GCATCTC TTTG ATTAGGGAGATATACAGA ACTTCC TTTT CAGAAA ACTTCTT  
GCCCAG TTTT TCCATAGAGG GAAA CAAGGATCCCTC CAAA AGTACTGGTCTGTCTATCAGACTCCAAGA  
AGTTCTCTGGAATAGACTTCAGGATGAGATCCCCCT TTTG TCAGCAGCAA TAAA CGATTCCC CAAA CGA  
ATAGCATACTGATTGACTGATTGCTCTCCTCAAGAGAAGCTGTCCAAGGTACTACTCAATTGCTCTG  
TTGAAGCTAATA TTTG CTCAGAAA TAGCTCGCTGCT TTTT TGCAAGATCCTGGCATGACTTCAAGTCTCG  
ATAACCGAAGAAA AT TTTG GCAGCC CAAA AATGCCGCGCTTACCAAG GAAACAAA TAATAACGTTTCG TTTA  
TTCATTCTCATCCGAGGTGGGTCTCCCTATGGGGAGGGAAGCCTCGTTCCTATCAAGGTTGC TTTAATT  
CCCTAAT CAAAAAAC TTTG CAGAAA GACAAA ACCTCTCCAATCTTGTGCGAGAATCGTCT TTTG CTTAC  
AAGAGATTCAACTCTGCTCTTCCGAACGGAGCTTCATACTATGTAAC TTGGCGTCAT TTTA TAGAGGGTG  
TCT TTTT CATGCACTTG GAAA ATAACCATCCCCCTCTCTACAT CAAA AAG TTTA ATGTAGAGTCGC TTT  
CAGATGTGGACGCTAGCAATATATATT CAAA GAC TTTG CATCATTTTTTT TTTA CTAGCAATC CAAA TGAT  
TCCAACCTCTAGAAA ACCCATCGGAATAGACAACCATTGCCCAATGTTAATATGTT TTTT TTCGCCAAGC  
CATGCTCCTTGGTGTGT TTTG AAAA AATTCAGCG CAAA AACGAATTACTGCTACCCCAAT TAAAGCGCCTG  
CTGCAC TATAGCCAGAACC CAAA CGAATAACACCACGATAG CAAA GCCTGCACAGAATACAAGAAA GCAC  
TAAA TAACCAAGGCC TTTG TAAAGCTGAACAGGATGTCTAGGGAT TTTG GCCTCCACCATT C GAAA AATC  
ACTCCCCAAGGCATGGATGTAGGGTTCTTAGAAT TTTT CTGATTCA TAAAGTTCCCCACGCGAATCAGCA  
AAGCTGCACAAC CAAA CACTGCTCCA CAAAGATCG CAAATGTAGGTTACT GAAA GCATAGGCAACTTACG  
AATATGAAGTCGCG GAAA ATACAGCTGCC CAAATCACCACAGAGATCACAGCTCCATGACTAGAAA GCCCT  
CCT TTTT CATATT TTTA TAATCTCAGAAGGAT TTTT CAAA ATAAA AACTCCCTCCATA GAAA AGAACGTAAG  
CAAGCCTAGCTCCAATGATGATAGC TAAA AGAGCTCC TAAAG CAAA AT TTTT CAGACTTGTTCGGAGTTC  
TTTT TTTT CTCTCCCTGTC TTTA CACAATGCTGTTGCCAGCTTGATGCC GAAA AAGATGATAAAA AAAATT  
CCTAGAGAAA ATAAGATCCGTACCACGATAAAA TGAAGCCCACTCGCGGAAA GATAAGAGAGTTCTAG  
ACTGGTCCCAATGTATCAGGTT TTTA TCACCTCTCT CAAAA GAAA AACTTTTCTAAA TAAAAAAGACTA  
TGC CAAA AATTT TTTG CTAGCAATCTTG CAAAAAAGATCTTCGCACGGT TTTT TCTCTCGTCAGCTATAT  
TAGTTGCTT TTTG AAAA TACTCATGCTAGAGTTCTCCTAATACATAAGTTCCCTCAGGCTCT TTTG CGCAA  
GCTTACAAGAGTGTGCTAGGGACA TAAA ATCGAATCAATTT TTTT ACTGAGTTGCGTTATGC GAAA ATT  
CTGGTACTTGCTTC TTTT CGCCT TTTG TCTTTA ACTACGACTACTC TTTT TAGCTGTGCTGTATCTAAT  
TCTGGCAGCTACAATGCTAGACTATACAC TAAA GGGAGCAAGGC TAAAGGAGTCGTCGCCATGCTACCTG  
TTTT TTTA TCGAACA GAAA AGTCTGCAGA ACTACTCCCTTGAA TTTA CAAGCAGAGT TTTT CGAAGAGAT  
TAGCAGACG TTTG CACTCTTCTGA TAAACTACT TTTA AT CAAA CACCACGCTTCAGCTGGTGTGCTGCA  
CAATTTTT TTTT CCTACTCCTAATA TTTT GCCCCGAATTAGCGACTCAGCTGTTGCCGTGCGGAATTCGTAG  
TTGCGG CAGAAA AT TTTA GAACAGAAA ACAACGGAAGATGT TTTAAA C CTTCTA TTTT CAGCATCTGTTTCG  
TGTGCGAGTGT TTTG ATATTCTGTCACAA TAAA GTCTCTATGATATAACCAAGAGAT TTTA GACCGGAGTCAA  
TCTCTCGCCTCTGGAAGCAACGATTATCATCGTTATGGCTGGCGTTC GAAAAACTTCGATTTCGACTCCGA  
TGGGCC TCAATGCATCAGAGATTA TTTA GAGAGATGTTGCTCGCGTAGAGGGATATGCTGCG CAAA CTA  
CTCTTGATATATGGTGGGTCTAGGACTTCTATTAGTT TTTG TTGGA TTTT CAAT TTTT CTTGCGAACGGG  
TTTT TTTG TATGGC CAAA GCCT GAAA AACATACCCA TTTA ACCATT CAGCTTAGTGTGCTTGGGGG CAGTGT  
TATTGCT TTTA CCGGCTCTGCTCCCCACCGGAGATCCTC TTTT CTCTA TTTT C TAAA GCCTCT TTTT CACGG  
CATC TTTG TCTTTA GTGCC TTTT TTTT TTTA CTATTGGGATTACCGGCTCCTATCACCCAATCTAT TTTG  
TATGCAGGAAGAACA ACTAGCTCAACTTCATGGTACTTGCCATAAGAGCTGGTGCTCGCATGTGGGTTA  
TTACCATTACCGCTACA CAAA TACTTGACGATTATTACAGCTTGTCTGCTGCCACTCAT TTTT G C CAAA CA  
ACTT TTTT C AAGAGCAGGTGATTACGGAA GAAA TTCGAGAACAGCTATCAACTAGACCGGACCTTCTCTAT

ATTTTC TGTATAGCTATGCTGATTCC TATTGCTGAA GAAATCTTT TTTAGAGGAATTCTC CAAA CTTTCT  
T CAAA AATACAT TTTCTAG AAG TAAA GCTGTTGTAACAAGTTCATTGATCTTTG CTATCACGCACATAGA  
AGCTTC TTTAGGTAGCTTCATC TTTG TGCCAAC TTTGTTTG TCT TTTCTTTATGCGCTGGC TTTATTTAC  
GAGAAGGTACGGCATATCGCCGCTCCTGTGACCCTGCATATCCTGTTCAATAGTTGCCAACTAGCGTTAC  
TGTCCTTA TAAAAAAAAGAGGGATGTGA CAAAAAGGATAGATAGAGAA TAAAAAAGTAAGCCAGAGAAAA  
CTCCTAGCA CAAA AGGCCTATCCTTAGGGCTGTACCTTCCGATCCTGACCCGGTTCAGAAGTCTCTCAT  
CTTAAGAGGTCCCCAGCTCACGGGATC TTTGGTACCA TAAATACAGT TTTCTCTCAAGTCTC TTTCCCTA  
AATCCTTATTAAGAAA TTT TTTCTTGCTGT TTTA TACGAGCCAGTATTCTTCAGCCTGTTCTAAAGAAA  
TTTGATTATGAGGAT CAAA AACATGAGGAGATCGACGACGCAACTTAGCCAAGGCTTCTA CAAA TACTTC  
TTCAGC TTTAAGC TTTCTTTCTC TTTCTAGCAAGAAGCACAAGGTTAATAC TAAA GTAAGTACGTCTCCG  
GCTTCCGAAGCGAT TTTCAACGAAGC TTTAT TTTCTTGTTACAGCATCAGCCAACTCCTGACACTCCCCTG  
CTATATACTGCAACATAGACTCCACACTCTG TAAA TTAGTCCAAGGA CAAA CTCCCTGTAAA GCCATTGC  
TCGC GAAATTTCAACCAATTGTAAGATGCCTT TTTCTTCCATAATTCATACTCCTT CAAAAAATGGGTG  
GTGCAAGAGTTAA TAAAAAACTAT GAAA ACCCTCTCTCAAGCG GAAA ATCCTAAGCTACAGTTGAGGAA  
CCCGTAGCCGAAG GAAAAAGTGGAA TTTCTTAGTATTT TTTA TACATAATGAGAATAATCCGGGTCCG  
CTCACAAATAACC CAAATCGAATGT TTTCTTTCAGCAATTGTTATTCTAACTGCAAT TTTGTCTTGTGCTC  
GGGG TTTGTTTCTTTATCGCATATAGC TTTA ATTCTCGCTCCCTTCTTCCCTTATTGCTCATTACAGTCAC  
T CAAAAAATAGGCAGCTCCGACAAA TTGCCAATCTTATGGCCTACCCCAATCA TTTGCTCATAACCCTAG  
TCTTCTTCGACATAGGGATTAATATTTGGAGTG CAAA ACTGCATAGCAACCTTAGTAGGGGATTTCGGCATT  
TCTATTGCTTACCGTAGGAGTTCCCTCGC TTTGACACTAGT TTTGGGAGAAA TTGTCCCTAAGGTTATC  
GCAATCCCTTACAATGCACGAATTG CAAA GATTGTAACCCCAATCATC TTTGCCTCAAC TAAAAGCTTCC  
GCCCTATA TTTGATTGGGCTATCTCGGGTATCAAT TTTATCGTTCA GAAAATGTTGGCCCGTCAA GAAAG  
TGAT TTTATTCAACCCCAAGAAT TAAA AGAAGTCTCCGAAGCTG TAAAGATTTCTGGAGTTGTAAA TCAT  
GAGGAAA GTCGTCTTCTAT TTTGCTATCTATCCATGGAAGAAGGTAGCATTAAAGAACGCATGACGCCCA  
AACAA GAAATCATT TTTATGATGTCCTTACTCCGATT GAAAATTTA TATAAACTCTTCTCTGGACC TAA  
ACAAA GCTATT CAAA GTTCTAG TTTGTAAA GGTGGTCTACAAA ATCTCTTAGGAG TTTGTTCTG CAAA  
TTGCTTCTTCTCTA CAAAGAAA AATTACAATCTGCCGAAGA ACTCTTGCCTCTCCTTCGTAAA CCTCACT  
ACATTCCT GAAA CAGTATCAGCTAAGACAGC TTTG TATCATCTAGCAGGAGAAGACTGTGG TTTAGGTAT  
TATCATTGATGAATATGGGTCTATAGAAGGATTGATTACC CAAA ATGATCTAT TTTAAA ATAGTCTCTGAT  
GAGGTAGCTCATAATCGCCCATCT TTTAAA CAATTCTGCTCACTCAGACAAGAATGTTGTTATTGCTGCAG  
GCACCTATGAGC TTTCTGAT TTTCTATGACCTG TTTG GAGTTGATCTTCTACTACAGCTAATTGCGTTAC  
CATAGCGGATGGCTGACAGAACAATTAGGAGAAA TCCCTGAAA CAGGAACAAA ATTCGCTTGGGGACAA  
TTTG TATTC CAAA TACTAGACGCGCTCCTAATTGTGT GAAA CGGGTGTATATAAG GAAA ACCCATG GAA  
ACTAACTCTCCCTT TTTCTGGTTAGGAGTGAACCTCC TTTGTATT TTTGTCCAAGGGTCT TTTCTCATGA  
TG GAAA TGGCTTGCATCATTCAATCGCGTGC GGTTGCAATACTACCTTAC GAAA AGCAATAAAA AAGC  
CTCTTACATTA ACTTCTTATTAGAAGACCTTATCGCTTAT TTTG GAACCGTAATGTTGGGAG TAAA TATT  
GC TTTG CAAATAGGGTCTGAGTCATCACGAACCTGTTA CAAA CTCTAGGGA TTTCTCCTGAATATGCTC  
CTGCAACG CAAA TTAT TTTAGTCGTCATT TTTGCTGAATTAATTC TTTAGCTATCTCTCG TAAA ATTC  
AGAAA AAATCGCCT TAAA AGGAGCCCCTATCCTCTA TTTCTGCTCACTATCT TTTCTATCCGCTCATCAA  
TGTGTCCGGTGGCATTACCAATATGATCTAC TTTA TTCTGAATATTAAGGAAGAGACGATCCACTCAACGC  
TTAGCCGAGATGAATG CAAA AGACATTAGAAA CTATCATGAAGAGCATGAT TTTCAATGTGATAGCTAC  
AAA TAT TTTCTCT TTTA AGCGCAACTTCTGTAGAGCAAGTATGTCAATA TTTGGAC CAAATCCCTATACTT  
TCAGCTACCGCTTCCGTACGAGATG TTTGCCAGCTCGTTCGTCGCCATCGTTTA GAT TTTGTCCCTGTTT  
ACCA TAAA GTTAAA AAGAATGTAGTGGGAATAGCT TTTCCAAA AACCTCATTAA TC GAAA TCCAGTGA  
CCCTGTTGTCCCTTACCTAAGCTCTCCCTGGTTCATAACAGC CAAA TCTAAGCTCATTATGCGATCCAA  
GAATTCGCAAGAATAGTTC TAAA ATCGCCATTGT TTTAAA TAATAATGGCGAGCCTATGGGAGT TTTAG  
GCTTACATACGGTG TTTAAA ACGTATTCAACACA GAAATATCACCCAAT TAAA ACC CAAA CCAACTTC  
TTTA ATTGAACGAAC TTTCTCTGGGAACACACC TTTG TCTGAAA TA GAAA ATGAGCTCGATATTATT TTT  
ATGGATAATGATTGTACAACAATTGAGCAACTCATGT TAAA ACTTCTGGATACTCCTCCAGAAGTAGGCG  
CCTCTATCATTATCAACGACCTACTGTTAGAGG TAAA AGAGAT TTTCTTGTACGGCAT CAAA ACTGTTGC  
TAT CAAA GACACTCTGTAACGATTACGCGTACTGCTGTAAGTGT TTTA CAACGCGAATTACCCCTCTGTGC  
TGCTGTAAGAA TTTCTTCTTCT GAAA GTAAA TAAC TAAA AGAAA ATCGTAGAGTAGCTACTGCAAGATCT  
TGAGGCAC TTTCAATTACTGTTAATGACT TAAA AACGTAGTGTCTCCAGAAGAACACGCAGAGCCATAAC

CACAAGCCACCCCTTCTAGATCTAAAAGCGATTTGCATCACTTCTCCCTCTAAACCAGGGAAAAGCTATTGC  
AGAAA GATTGCTAACTCGAGGCTTGTCTTGACAATGCACGATACATTCAGGGAAA GCTTCTTGATACGC  
GACTCAAATAGATCCCTATAAGAACGCATAGTTTGAGCTATGGCAGGCTGCTCGACTAATAACTTGC TAA  
AAATATAACGCAGGGAAGCAATACCATGAATATGCTCCGTTCCCGAACGAATACCTCCTTGTGTCCCTCC  
TCCAGAAAATTATTGGAGATATTTTGATT TTTGGAGATGTAAGAAGGACTCCGATTCCC GAAAAGAGCGTGA  
AACTTGTGTCCAGAAA AAGCAACCATTGAAACTCCCTCTGGAATGTGAATAACTTCTTTTCTACAATAG  
CCGTGGCATCCACTATCAAAGTAGTTGGCGTTC TTTAGCAAATTCGGCTATAGCTTCAAGATCAATTCT  
TACACCAACCTCACTATTCACCCATCC CAAAACGATGGCTGAGGTATCTGATTGAACAGCTTC TTTAATT  
TGTTCTAAAGAAA CAACGCACTCTCCAGGAATAGGGTCCAAGTAAGTCACGGAAA GC TTTGCTTGC TTTA  
AAGGTTGATCACTGCTGGATGTTCCATGCTGGAAGTAATAACATGGCTTCCGTAGGAATAT TTTGAAT  
TGCCAGGTTAAGAC TTTCTGTTGCTCCAGAAGTA TAAATCACCCGACAATGAC TAAACCCAGAGCTTT  
TCTATAAGAGTTGAAGTTTCTTTAACCAATTT TTTGGT TTTCTTTCCAAA ACTGTGAACGCTAGAAGGAT  
TCCCGAACCCACCTTCGCCTATGAAAAGAGAATGTAAA CACATCAAGACGCCAGGCTCTAAAAGAGCTGA  
AGCGTTCGTATCTAAGTATATAGTCA TAAAAATTAACGCATCCGAACCAGTATAACAGTAGCATTATCTC  
TACCGCCCCGACTG TTTGCTAAGGAAA TAAGGATATTTCCACCTTCTTCCAGAGTAGTCGTCTGCGTTAA  
TATATCTAGCATGTCATGATCAGAAA CAGCACTAGTTAGACCATCAGAA CAAAAA CAAATAGGTC TTTCT  
TTCTCATAAGACATCTCTCTAATATCAAGAGACACATGGGGACGACTTCC CAAAACATTTTGTCAGAACGT  
TCCTTCCAGGATACCTTTTTCACAC TTTGTT TTTGAAA GCCCATATCGAGAAGCTAAGTGATTTCGCAAGAGA  
ATGGTCTTTCAGTTAATCTTTTCTAGCATCTTATTTTCTTAATCGG TAAACCCGACAATCTCCACATGAAAT  
AGCCAAGCTTTTACCCTTTCGGAATTCATACAACCTCAAAGTAGTTCCCATACC TTTGAATTCCTCATTTCG  
ACAATCCCTGGCGA TAAATTAATAAG TTTACCTCTGATACTATAGTC TTTATAGACTCTTTATACTGCTC  
ATCTCCAAACCCTTC CAAATCTACTTTATGTAAA TCGACAAGCTGCATAAGATTACCAACAGCCTCATAA  
GAAGTACTGCTCCTGCACGATGACCTCCATTCCGTCTGCAATGCAATGAGCTGCGAATCATAGTTTA  
CCTGCCAAAATCTTTCGTTGTTGTGCCAAC TAAACCAACATCACTCAATC CAAAGTATTC GAAA TCCGC  
AACAAATCATCACGCCCTCTCCGCCAAGGAATTTTCATAGACGGTTGATAAATCAATCGCTTAAGATTCT  
CGGAGGTATAGCAAAGATTCTTTTAAAAAAGAAAAG CAAACTTTTATCTGTATAAAAAGGTTGTTAATCTG  
TTTCTTTTCAA AAAAAGTTTGTTG TAAAGAGGGTCTATCTCCAAAAGATGGGAAGAAGAAAATTTTATT  
CTCCCTTCCCCCATCAAACAGAAGTATTTTACTCTGCC GAAAAACAACACTTAAGTATAGTTGGGTAT  
CAAAGTTGCCTCCCTTTTAATAACCCGTA CTTAGAGGATTTCGTACAATGACAACGTGGACTTTTGAATCA  
CAATAATCTTACAAAATTCCTGACCCATGCTCAGCTAGAACCTTC TTTAGAACGAGAAA GCGGCTTAATC  
TATATCACAGTCCCTGCGGGAGAACATGAGCTTCCCTCTTTTTCGTTATTTCGTAATGAAGGAGAAGTTT  
TGCAACTTGTCTGCTATTTTCCCTTATCAAATACAGCAGAATCAACGTGATACCACAGCAAGGCTTTTACA  
TCTCGTCAACCGCGACATCGACATTCAGGATTTTGAATGGATGAGGAA CAAAACATTATTTTCTACCGT  
CTAGTTATCCCTTGCC TAAAGGGCGAGATTAATGAGGACTTACTACGT TTTACATTGATACAATCAAGT  
TGATTTTGTGATAGCTTCTTCATGCAATAGGATTGATCTCGACAG GAAACATGGATCTGGATGAATTGAA  
AAAGCAAG CAAA ACTAGAAAATAACCAATCCGATCAGCTAGAGCCTTAGAGGAAC TTGTGCCAGCTTTTAA  
TTTTTTATGATACAGAAACGACAGGTACGCAGATAGATAAGGATCGTATAGTGGAGCTAGCTGCTTACAA  
CGGGACTACGAGCGAGTCTTTCCAAA CGCTAG TAAACCTGAAA TCCCTATACCTGCTGAGGCAAC TAAA  
ATTCATGGTATTACGACTGCGGAAGTAGCCGACGCCCCAGATTC CAGAAGCTTATCAGAAATTTATCG  
AATTTTGTGGTACAGATAATATCTTGTAGCTCACATAACAATGC TTTTCGATTATCCTCTGTAGTTTCG  
TGAATGTCGTAGACACGGCTTATCTGAGCCTCAGCTTTCGTA CTATAGATTTCGT TAAAATGGG CAAA AAAA  
TATCGAACCGACTTGCCTCAGCATAGTCTCCAATACCTTCGT CAGGTATACGGATTCGAA GAAAATCAAG  
CGCACCGAGCATTAGATGACGTAATCACTCTTTTATAGAGTATTTTCAGCTTTTAGTGGGAGATTTGTCTCC  
TGATCAAATTTATGATCTACTAAA TGAGACTTGTCACTCCTCGCATA TTTAAAAATGCC TTTTCGGTAAGTAT  
AAAGGGAAACCTCTTTCTGAAGTCCCCTCTAGTTACATCGCCTGGTTA CAAAAAGGTGATTACTTGCTAC  
AACCAGAAAATAAAGAAA TAAA GCAGCCATTGAGGCCTATCAGCAATTGAAATGACTTTTTCAGCAGCG  
TTCTCACCTGTCTAATGACATCTTTCTTTTTCGGTCTTTCTTG GAAAAACA TAAAGGATTCCCTTCGT  
TACGCC CAAATCATGATCGCGGATA TTTCTTCTTTAAA TTATTACGCTTTAGAGACTCGT TTTCCCTAAT  
TAAAA TTTCTGCAAGCTTATACCCACAGATCGCTGATTCCCTATGATGTTTAAA TGTGGCACTACTCTG  
GGATACAAGATCGGGCC TTTAATTC TTTTCGAAA CAACTCGATTCCCAT TAAAAGCCTTGCTACCCAG  
GTGAAA CGACAACAGCACAGCTCTTTG CCGCCTCTTCTACCTCGAGCAGAACTGGTTCCCTAT GAAATA  
TCATGAAATCATTCCAGCTATTC TTTCTAATCGAGTAGATGGTGGAGCTGTGATTACGAAGAACGCTTC  
CTTTTCC TAAAGATCTATGCATAGTAGAAGATCTAGGTCAAC TTTGGAAA AAAC TTGGCATCTTCCCT

TACCTTAGGATGTATTGTTATCTCTAAAAAGGTATCTGATGACGATTCTTATCTGTAAAGTCATGCTCT  
TCAAGAATCCC TAAA AAAATC TTTG ACTGATTCTGC TTTAGCTATT CAAAAAGCTTCTGAGTACTCTCGA  
GATAAA AACCCA ACTACCATTCAACAT TTTATAGATACCTACGTAACAGAA GAAA CC TTTAACCTCTCTT  
CTATCGGACGGCAAGCTT TTTCTACATTATGGACGGCTTGTGTAATG TTTAAGCTCCTTCTTATT TTTG  
CTGATCCGGCAGAAGCTGCTAGAACACTCTCTCTG TTTCTTT TTTCTCTTAATAAGGAGAACT TTTATAC  
CTACCATACAGAAA AC GTTCTGTAGATGTTATGGTAC TAAAAACATGGGGTTACCGAGGAGTTGTTCAA  
GCATTAAGCCCCCTCCAAGTGGATATGACCTGTGGA TAAATGCAGGA TTTGCCGGAGCAGCCAATC CAA  
ACATACCTCTTCT TAAA ACTTATACGATTACCTCTG TAAAAAGAATTA ACTCCAACA ACTTCTGTGGAAGA  
AGA ACTTGAAGTAACCCCATCCCTAGACTCCCTCTAGCACAATGACATCAGTCAGATCTCCGTATAGA  
GATGGG TTTCATGAACA TTTACAGCTAGTCGATATGGAAGGATT TTTCATAG CAAA ACAGGCTTCGTTAG  
TAGCGTGCCCATGTTCTATGAT TAAA GTATCTTCTGACTACACTACGCGGAAGGACAAGACTTCT TAAA  
AAATAA CAAAGTCAAGCTCTCT CAAA AATTAGCGGAGGCTATC TTTCCGATATATTCCTCG TTTATTGAT  
G TTTAACACATCCCTTCCACGGACCATCAT TTTACGACGGCATTGAGTTCCAGTCTTAGCACCTGATA  
AGACCCACATTC TTTGAAA AGCTGGGCAAGAGTCTAATAACTCTTC TTTGGTTCTTCTGCTAT TTTCTT  
CCCTTGTCCAAG TAAA CAATCCGATCTACGTATTCGAGAGTGGAGAGCTTGTGGGCAATGATAA TTTGT  
GTACAACGGCCT TTTAACTGCCGACTATCTC TTTAACATAAT TTTCCGCTAATGGCATCCAATGCTGATG  
TTGCCTCATCTAGCAACAGAATGGAGGTGTTATGCAGCAATGCTCTAGCTATTGT CAAACGTTGCTGCTG  
ACCTCCAGATAAA AT TTTACCGGATTCTCTAATAAGCTGTGCACGCCTTGAGGCAT TTTAGAAACAAAT  
TCGTAGGCATGAGCTTGC TTTAAA GCAT GAAA TACTTCTTCTTC TAAA AAGGTTCTGCCACAAGTCAGGT  
TATTCCACACCGTATCATAGAA TAAA AATGGATGCTGCAGCACACAACCAATATG TTTCTTAAA GAATT  
TTTG CAGTAGC TTTGTATCGGAAGTGAATCAATTAACAGTTCCCATGAGAGACTTCATAAAA GCCTTGGC  
AATAAC TTTGCTATGGTAGATTTC CCAGATCCTGTTGGACCAACAATACCGATAGCCTCCCTTTT TTTA  
ATACTAAGTT GAAA TCCGATAATACGGGACTATCCTCTACATATC CAAAGGATACATTA CAAA ACTGAAT  
ACTATGTTGTAATCCCTGGAATTCA TTTAACT TTTCCAGAAA CATTGGACTGCTGC TTTGCTAGATCCAAT  
ACTTCA TAAA ACCGTTCTGCAGCAGCGCATCCCCGCATGATATTCGCAT TTTCCATCAG CAAACTT TTTAA  
TCGGATCATAAA TGAGATA CAAA AGACCA CAAA AGACCACAAGCTCCTCAGGTGGGATAT GAAA ATGATA  
CAAA CCGATCATAATGAC CAAAG CAAA GAACAACGAGGCAATAGTGTGCAGAAGAGGTCTTGGAAAT TAAA  
CTATACACAGCACTGCGCTCTTCCAATCGAGCAATCTCATCAT TTTCTGACAATACTTAC TAAAAGAAA  
ACTGCTCAGTTC TAAA TACTTTTACTGTAAGAATACC TAAAAGAAA ATCCAATAACGCAGCGCAGAATG  
ATCTTGACTCT TTTGAATTTCGTTTAGCCAATGCT TTTAAC TTTCTTTGCAATGATAACAATTGG CAAAATA  
AAAATAGGGAACGC TAAACAAA CACAAGCACAAA ATTTCCAAGAAA TAGACAAGCACACTACTAAGGCTA  
AAGTCATAGTGATAGGAGCCTGAATGTAATTCACCATAAGGGCATTAATAGCTAATGCAATCATAGATGA  
ATCTGCTATCACAGCACTACTTAGATTCCCATATCGTGTGCAT GAAA GAATGTCATCGGGAGCG TTTGT  
AAA GCTAAGAAGTAATC TTTACGTAAA GAGCAGCTCACACGAATAGCAATTAATTGTGC TAAA AACCTCT  
GAAA AAAATAGCGTTGTTGATT TTTCAA ATAGCAACA ACTACTAGAAA AAGCGCAGGCATTG CAAA CGAGA  
AAAGT CAAA ACAACCAGAGAGATAGGCG GAAA GCCTT TTTG TTATTGACTGAGAGCCTCCTGAATG TTTCC  
GCAATATAAGCATTGCTTGAGG CAAA GATAGCGTGTCTCCCTCACCAACAATATATCCCACTGTTCAA  
GAAGTTGATC TTTG GACAGCTC TTTCT TTTG ACTAAGGAAGCTCCCTCCTGCTTCC CAAA AAGAAGAAA  
CGTATCAGGACCTGTCTTAGCAATAAGACCTAGA GAAAAAATTTCTGCTTGAGACGTTATCGTTAGCCCT  
AATATGGA TAAA AGA GAAA AACCGAA TAAA ACTAAA TGCTTCTTATGCCTCAGAATCGC TTTCCAGAAGAA  
G TTTCCATATAGACCTATCGTTCCGAA TTTCTGATATCGTT TTTCTAGCAACTCTTCTACCGGTAGATCTT  
TCAA TTTAACCCATCTTGAAGGACATATTCTTGAACACTACGATATGTGGCCGAGGATTGTGATGAGC  
CCCACCTATGGGTTC TTTGATCACTGCGTCCACAATAG CAAA TCCCTAAGATCCTCTCCATGCATTTT  
AACATGGCAGCAGCATCACTGTTCTT TTTAGGATC TTTCCATAAAA ATAGAAGCACACCCTTCAGGAGAAA  
TTACAGAATAATACGAGTGTCTAGCATCGCTACAACATCTCCTATAGCCATTCTAGAGCGCTCCTGA  
ACATCCTTACCAATCACAATTACAATGATTGGGGTAGCTAATCTAGCTAACT CAAA TAAG TTTGTCGCA  
ATAGCCCAACCTTGACCTC TTTCTTCGGCTGTTAATCCAGG GAAA GCTCCAGGGGTATCAACGAGAAA GA  
TAATTGG CAAA CCGAA TTTCTCTGCCAT TTTAGCTAAGCGTAGAGCC TTTCTAAA GCCTTCGGGACAAAG  
CATCCCGAAGTTACGATGCATACGAGAT TTTGTGTCGCAACCCT TTTCTTGCCCTATAAGCAT GAAACGC  
TGCCCTTGAATC TTTG CGAACCTCCGACA ACTGCAGGATCATCTCGAACGTTTCGATCTCCA CAAAGTT  
CTA CAAA CTCTTGCACATTCTTTCGATATAATTCACTGTTCTCGGTCTCGAAGGATGTGCA CAAATTTG  
TACTC TTTCCAAAGGGGTGAGATCGGAA TAAA TTT TTTCTTTTAATCTATC TAAA CGCTTATCCAATTT  
TGAATCTCTGAAGAA GAAA GCAGGCTGT TTTCTTTA TTTTTTTCTTTAAACTCGGCGATCGTTTT TTTCTG

ATTCGACAACCTGTTTTTCATGAGGAAGTAGTTCACCCTAGCACGCTCCCTTCTTAATAAAAAGAGTTA  
TTTTAATACAAACAATGATCAAAAACAACCAAAACCAACTATTTGATTATAATGACC TTGTTTCACGC  
AAACAATTTTAATTTCTCTTAAAAA GAAATCAAGCCTTTTCAAATAAAATGTTATACTATTTGTGTGT  
AGGGAAGATTGATCAAAAATTACTTCCC AAAACCGATCTTTGCCCTGTAAAGAAA AAATTTCCATATG  
CGGACTAGAAGATAAAATCCGAACAGTCTCTTTTCTCC TTTAATCAATACGTCATAGGCTGGGCC TTTA  
TAAGAGTCTGGAGATCCTGTACGCAATTTTGGACCATTGCATACTTGACATTGCGATCCCTTA CAAAAGA  
TAGCAAAAACGCATCCTGATTTTCCCTATC AAAAGAAGAAGCAACATGACACTTTTGGCTCAGTAATGTC  
TATACGATAACATGAATTAGTGTAAACAAA GCATCTTGCAAA TAA GAAAAGCCTGTTCTCCTGGAAGAA  
GGCTGTGA CAAAAGCTCCTGCAAAAGATATTGATACTTCTTCGTCTTTCTTTGACATGAGAACTC TTTCA  
CTTGGCCGCATAAA CCAAATCC CAAA CATTCTCCTGGATCCCCAACGCAAGGACCATAGTTGAGAACCC  
CACATCTCCTATCAAAAAGCCCCACTCCGCTCTTACAACCACTACCACTAACATAAGCA GAAA AAGAA  
GGCGTCTGCGCATC CAAA AACCAAGAGACATATCTGTTAGCGTGAACCTGATCTTCTATACGGGCTTCTT  
TTTGGCAAAATAACAA TTTACTAACAGCTGTTT TTTCTGTTGGATCTAGAGCCTTCTTGACTCCACAA  
TGCAGG GAAAATGTTTCTCTCATGA GAAAATAATGCGTGT GAAAAGCTATCATT TTTGAACTTGCTCG  
TAGCTTGTGTCA TAAA ACTCTGCAATACGAGACAACAGCATAGCCATCTCAGCATGCTCCCCAGGATAAG  
GAAGGCCTCCCCATAAAAACCTGCTCGAC GAAA TAA TAAAGCCGCTCCAGACTGCGTCTGATGCATACA  
AAGGAACTGGTATCCTAAGTCTACCCCTTCTT CAAA GCTGCCAG CAAA TAAGCGGCACGAGCGATATCA  
TGAATATGTAACAATGGATGATGTA GAAAACGCTGTATAACGGTTCTTCGCAGCTTCTTATCCTG GAAAG  
ACTCTATGAGACTCTTAC TTTGAATAT CAAAATTCCTCTCAGAGAACGCCTCTAATACGCTCCTCTAACCC  
TAACTGCGATTCTACTAGCATAGTTAA TAAAAAGACGTCCAATGG CAAA AAATAATCTTTGAG GAAATTTA  
GAGTCAAGCTTGCTTACGCTGAAGCCTGACTCTACGATC GAAAG CAAAGCCGG GAAAAGGGAAGAAGACT  
AAGAAGAT TTTGTTGGTG TTTCAAT CAAACGTTTCATTCTTTTGCCAGGAGTGAACCTTCACAGCTCTTCT  
AGCAGGAATATGGATAGGTACTGCTGCATTTT TAGGGTTACGACCAACT TTTGCTTTCTCTTACAAC  
TGTAAGAACTC CAAAGTCTCT TAAACTCTAATCTATCCCTTGAACCTAGAGCATCTGTCATCTTATC TAAAA  
AAT TTTGATAACAGTCTCACGTGGTTAGGATGTAT TTTATGATCTTGAGATATCGTACTGATTAGTTT  
CTTCTTAGTCATCGTTGCCATGGTAGCTTGTGCTCCTAGT TAAAGTGGTAACCCTTGCCTCC TAAAT  
ACCGCAATATATGCGTATAATATGCATTCATCC TTTGGATTCAAGACTTTTT TTTATCT TTTTCATGAACG  
CACAAAATCTACCCACGAGTTGCACTCAACC GAAA CTTCTCCACTACGAATATCC TTTTCGAGCACT TAA  
AGGCTTGT TAAAGCCCTCCCTCCCCAGATTATTTATGCACTTTT TTTGCTCCTGAGCTTACTGATACA  
GTCTTGTCAACTTGTGCGATT CAAA TAAAAGCATGTATGCCTTCTGCAATACC TTTGGCTAAGTGCAGC  
GATAACGAGCATC TAAAAGAGCGGCTCGCTCTTTA GAATTGAAAGAAACCTGT TTTCCACAAGGACCGC  
AGGCATGGTTG TTTCTCGAATTACCGC GAAATTACCTTCT TTTAC TTTACGTTGCG TAAAGCTCCATTT  
TTTTGCATAAAAAGCCAAGATCGACTTACCTAAGCTCTCTGATTTTCTAGTCCTAATATGTT TTTATCAT  
TATAAAAATAAA TCTCAGTTCC TAAAGCAGATGTATTAGACGAGTGATTACAGTGGATACTAA CAAA AAC  
ATCAGCCTTATTCTGATTTGCTATTGCAGCTCGCTTACTTAGATCGACATATACATCCGTAGCCCTTGT  
ATTATCGTCTTATACCCCATGCGACG CAAACATCCTTGACGCT TAAAGCTATCGACAACGC CAAA GTTT  
TCTCTTTGTACCGTAATTCCTTATCTGCAGTTCCCTCGTCTTTA CCGCCATGACCAGGATCTATGACTAT  
AAGTTCATTCCTACTTACCTTAGGAATCCCCGCAGCATCAG CAAA ACAACTAAGTGGACTACT TAAAGTA  
AGCAGCAACAGCAATAATGT CAAA TTAACAAA GGGCTGCCAAGGCTTCACACACAACCTCTCGATCAT CA  
AAGACAATCGTCTGATG TTTGAAGATCTGATACCCCTCATGTCCC TTTCCCGCAACTAGTACAATATCTT  
TATCTGAAGCCATTGATATTGC TTTCTCTATGGCTAGCTTCCCTATCACTCTCAACAACATAATGATCAGT  
TGA GAAA CTTTACATATATCAGCAATAATCTGGTCTGGATCTTCTGTCCGAGGATTATCTGAAGTCA CA  
AAAGAAA AACCGTAATGCTCAGATAC TTTGGCCATAAGAGGACGCTTAAACAGATCTCTATCTCCACCAC  
ACC CAAA CACAATAATTAGCCGACCATA TTTAGGAAGGAGTTGTAA TAAAATCTGCATACATTGTCCAA  
TGCATCTGGAGTATGGGCATAATCAATA TAAACAGGGAATGGCCCCA TAAAATCGGATC CAAA CGTCTT  
TTAGGAGCTGATAA GAAA CGAACATCGCGTAC TAAATCAG CAAA GTCTCCGCC TAAA AATTGATGGACAA  
CAGC TAAA GATGCT TAAA ACATTATATACATTATGTTCTCCTATCAAGGATGTCTCACAAGG GAAAAC TTT  
CCCCGATAC CAAA TGTACATAAGAAGATCCTGATGAATACAGCTTCAATCTATCTGCTCGATAATCAGCT  
TCTTGATGGATTGCATAGGAGACTGCTCTTGCTGAGAACCATT TAAA AAGCTGGGCGCATACTCACAAT  
C CAAA TTAGACAACAGCTATACC TTTCTCTGGCAAGGAAGC GAAA AACTGCTTTT TAGCTGCAATATATTC  
TTCAAGAGACCCAT GAAA ATCT TAAA TGATCTGAAGTAATGTTAGT TAAA ACTCCAGCTAAGAACTCTGTT  
TCACGAACTCGACCAAGAGCCATCCC TATAGAAGATACTTCCATAACGGCTGCAGATAAGTTCTGCTTAA  
CCAT TTTAG CAAA ATACTTCTGCAA TAAA ATCGCATCAGGAGTGG TAAA GCTATCAACAATCCTATTTCTC

ACC TAAA ATGTGCTCTATGGTTCCAATAAGACCAGTTCTTATTCTGAACGCTCCATAAGTTCTCTAAC  
AAA CAGGAGACTGTTGTCTTCCATTAGTTCCCTGTAATTCCTATTACATCCAGATGC TTTGAAGGATTAT  
TATAAAA ACCTTGCTGC CAAA GAGGCTTCCAATGCTATAGGATCTTCTGCGATAATCTGAACAACCGA TAA  
AAAAGGATTGTATAGAGAAGAGAGA ACTGCAATCGCTCCATTGCAACAGCCTGAGAAGAATAGTCATTG  
CCATTG CAAA ACTGCCCTTGTCGAGCGAT GAAA ATATCACCAACTCCAACACAACGAGAATCTCGAGT CA  
AATTTCTAACAGGAATAGACTCGAC TTTCCCA TAAA TTTTAGCCGGAATATTCCGAAGAAGTTGGTCTAA  
ATGCATACCAGATCCCTAAGACACGCACACAAGGGCTT CAAA AAGCGTTCT CAAA TAG TTTA CTATACAC  
ATATTGTTGTCAAGC TTTGTCGACTAACTACGTCTGTGTCAGAGAAA GAG CAAA GACAAGAGA ACTCG  
TCTT TTTACTCT TTTCA CAAAAAAGTAACTCTTATATGGAG CAAA GAAATGT TTTGTTGTGAGATATAA  
TTAT GAAA TTGCTCT TTTCTTTA TTATTAG TTTCTCTCCCGCT TTTCTTATGCCAGGCTGCACACTCAT  
CC CAAA GCAACAGACCTCAACACATTCCTCATATC TAAATAAAA CTCCTA TTTGCGATTCCATTCCCTCA  
TATAGCAGC TTTAATTGA GAAA CTCTTACGATAGGTGTGTAGTTGCTCGTCTAATGGCACACC TAAAT  
AAGGCAGCACTCGAGAAGCTATTCTC GAAA ATACAGGAGCAGCACACCGTCCCTCCATATAGTTCTTAGT  
TCTGTCTTCTCTTACTCCATAAGCAGGATCGTCGATA GAAA CAAGAATAAC TAAA GAACTGCAGTATCC  
GATAAA GCAGCTATAGGAGTAAGCCCGA TAAA TGAAGCAATGTGCCGTTTTTTA TCATACTTCCCATCGA  
CTAATT TTTCTGTTGTCCCTGT TTTCCCTGCACTAGAATATCCCTTAGTAGCAGCACGAATCCCCGTCCC  
TCC TAAACATGTTGT GAAACGCATAGCACGAACAACATCTGCAACTATTTTTTTCA GAAA GAACTCGAAT T  
TTCTTTGGGTTTG AAGACAGTATTT TTTCTTCTCCTGAAGGAGAAA CAATC TTTCTAACCAAGGTTGGAC  
GTAT CAAA AACCTCCATTAC CAAA AACTGCATAAGCTTGAACCATCTGCATGCTTGTAGCCAG CAAATT  
GTATCCCATG CAAA GAATAAGGTGTGATAAAA GACCATTCCGGGAGATCCGTT TTTATG GAAA CGT TTT  
CGTGAAGGAACCAATCCTACAGCTTCTGCCGGCAATTCAATTCCAGTTCTTT TTTCCAAAAC CAAA ATCTT  
G CAAA CGCTGTTTCATACCAATCAGCACCTAACT TTTGTACTATACGATCTGCAAGTTGAGCCATATACAC  
ATTGGATGACT TTTGAATCGCCATGTACATA TTTAAGTATCGATTACTGACAATGTCT TTTAGAGGCATT  
TTTTGCCGTCCTG GAAA TACTCGTCTACTAACATCTAACGGTTCATAAGGAT CAAA AAGAT TTTCTCCAG  
CACGTT TTTGCATCTCTTCA TTTGCTAATAAGGCAATAGCAACAGTTATGGG TTTCTATAATAGAGCCCGG  
CT CAAA CACATCGCTAACAGCCTTAACT TTTGTATCTTCTATGCGATCATTGCAGTTGAAGTATTCCTTA  
TACTCTCTCGGAT TAAA AAAGGGATATTGCGC TAAA GCTAAGATCTCTCCTGTATGTGAATTCAGTACAA  
TAGCTCGCCACTACGAGC TTTAGCTTCTAACACGCCTAGGGCTATCTCTTGTCTGCAATCGTCTGTAC  
ATTGGCATCTATTGTTAGATAAAA TGTGCTCCCATCCCTAGGGAT TTTAGTCACTTATCAACGTC TAAA  
CGG TTTAAAGGAGAACGCAACAACCTGCGTCTCCAT TTTCCCTTCTAACAAA CGAT TAAAATAAGCCT  
CTAAA CCTCCTGTAGGGAATGCTTCTCCTGATT TTTCTATCTTTTATCTCCCGAAGGGTATG CAAA ACCTG  
TCCTAACAA TTTCCGAATGGATAAGAAGCTTGATAATCACTAA TAAA GAATAAGGCA TTTGACGGAAT T  
TTATG TTTA ACTGCGTAAGG TTTCCACCAACT TAAA ATCCGATCACGAATA GAAA CATCTAGAGAAA CGT  
ACAG TTTGCGATAACGCGAT TTTCTAT CAAA TTCCTACTACGGATACTCTGATAGTCCCCTTCGCCAACCAT  
AACAAACACCATAACGAGCAATCTCATCGCGATACTCTTCCGGAATAACGACAGCATCTAAGCATAAA TGA  
AATTTA GTGATATCAATAGCTAACGGGT GAAA TTGCTCTTTTTTCCGCC TTTACGCAGACTGGTATTAG CAA  
AAAAGGTTCCCT TTTGAAAAGGATCT TTTAACGC GAAA CTCGTGTTGATTGCGCCCTCCACAGCCCACCG  
CTCTCCATCA CAAA TTTGAAT TTTGTAATAACGA ACTATTAAGAGCGCGTATAGAGA CAAA ACCCAACA  
ACGATCAGAGTTAATGTCTACGGTGATTCTAAGC TAAA AACTGAT TTTCTCTTCGCTAAGATACTCT  
AGATACTGGTATTCTGGAAGAAA AGCTATCTGCAA CAAATGTTTCAGGGC TTTCTAA TTTCTCTAG TAAA  
AACTAAGCGCAACAT TTTCTTGTCTATCTGACGCAATTGAGCCCA TAAACAAGGGAT TTTCCAAA CGAAG  
TTTTGTAAGATCATCTGT TTTATCTATATACCGA TAAAGAGCGCAACA CAAAAGACT TAAACAGACAAGT  
AGTCGC GAAA ACCGATACCTATTCACTTATCTT CAAA ACTCT TTTCAAAA CAACGCAACTTAGCTGA  
ACGTGATCGAGGATTCATCCTGG TTTCTTCATAAGAGGGCATTATCACTTT TTTAGTCAATATCTTACCA  
AGCCCCCTAGCCTCAGCTTCTC TAAA AGCCCACTTAACAGGACGATCATC TAAA CTA CAAAA GAAA TAA  
CAGC TAAA CGCCACCAGGACGTAACCAACG GAAA GCAGAGTCTAA CAAA ACTTTTAATTGAGCCCCTTC  
CTGATTAACATAAAA TGCAGAGCTTGGAAATATCAATGTTAGTGGATGAAT TTTCTTTCCGCAATCGATAG  
GAAG GAAA GACTCCAGACGTAGCATCT TTTAGATC TTTAACGGT CAAA ATCTTTTTC TTTTTTCTAAAAT  
GCACTACAGCTGCCGACGACTCCTC CAAA GAGGCTCTTCTCCGTAGTTAC GAAA AA TTTCTCCAATCTC  
TTCTTCCCT TAAA GAATTAAGCACTTCACTTGCAGTCATTCTCGAGAAGTATCCATTCCGATATC CAAA  
GGATGATCTTCTCCTT GAAA AC TAAA TCCACGTTCAAGGTTG TTTA ACTGCATAGAGGATACTCCTAGAT  
CAGCAAGCACTCCATCATACGTCCCATCAGAAGTCAGTGTATCCACTTCTT CAAA AGAAGCATGTCGCAA  
GCGCACGCGATCCT TAAA AGGAAGTAATCTAT TTTCCGGATAACGCCAGCGCAGACAGATCTCTATCCGAC



CCGTCATACCGCTCTATCGAAGGAAATTCGGTTAAA AAAGCTTCTGCATGACCACCTGCACCAACAGTCA  
CATCA CAAAAGACTACTGGATTACGACCGGGAATAATGAAAGACTCTCTTTTAC TAAAACAGGAATATG  
AGGAATTGAATCGGTCACGGGGAACCTTCTGCA TAAAAGTTATTATCCATCCACTACTACAATAAGCCGC  
TTAGCTGC GAAAGTACAGCTTTCAA AAATTCCTTGTAGCTAAA GCAGAAGGTTGCAGTGTATCGCATG  
TTTAGT TAAAAGCACAGCTCTTCAATACACCT CAAACAGCAACTTATTACATCTAATACCT TAAAACCT  
TTGC TTTACGTTCTCCCCTCTACCATACTTGACTT TTTCCCTCCCCGATTATGATTGAGATTATGAGCC  
TCTCAAGG GAAACTTATGGTC GAAATTTTAACTATAGTACCTCGGTATACGA GAAACACAGCTCTACGA  
ACAAGCTTGTTAATGACTTCCGTAAAGAAATC CAAATGGAAGGCGCAGCGATTCTGGGACATAGCTAAGCA  
TGCT CAAATCTTAGATATGACACCCAAGCCTTCTGCGTTATCAACGCTCATG CAAACAAATAAA AAAACT  
TGCTGGGCGTCCT TTTCTCCTCCAACCAATTTTCA TAAA CAACGATTCTCCACTCCTTACTTAGTACCAT  
CTCTCGGCTCTCCTGATAAA CAAGACCAAGACATG GAAAAAATCTCTTCTAT TTTAAAAGTTCTAACTAG  
AGGTAAAT TTTCTTACCGCTCAACAGCTGACACGC TTTTAC GAAAAAA TAAAACGTCCTCTGAT CAAAAG  
AGAAA TGACAACAT TTTGAGCAGGAAGAGCTTGAAGCAGAAGAGGAAGTTTATGTACGAGAAGGCACAG  
TATTGCTTAGAGCATTTGGATCAAGGAATCAAGAGTTCTAATCTCCTTATCGATTATGTTATTTCTCGTAT  
TTTTCAATTCGTACAAGGTTAAGCGTATATGTTAGATAATGAGTG GAAAGCAAT TTTAGGATGGGGAGAC  
GAAGAACTCGAAGAGCTCCGCATTTCTGGATATTCGTTCTTCTCGTCAAGGGCATTATCAGAAA GCTATTC  
TTTTTT TTTGAAGCTCTCGTTATCTTAGACCCTCTAAGTGTATATGA TTTCCAAA CACTAGGAGGACTCTA  
TTTG CAGATTAGC GAAAATAC CAAAGCTCT TTTATGTCCTGGATCAAGC TTTACGTATGCAAGGAGATCAC  
CTCCCTACCCTGCTCAA TAAAAC TAAA GCTCTATTCTGTCTCGGACGCATAGAAGAAGCATCAGCGATAG  
CTTCTACTTAAACGTCGTGTCCAGATCCTATCATTGCAGACGATGCCGAAGCATTACTACTTAGTTATGT  
AAAACCCCCCTTGGTTGCTGTTGATAATGCATTTCTATCTGGGAGAAG CAAAAGTCTCTTCTTGAGA  
GATTCTCCTTCTATTATTGAGTATTAATAAT TTTGTTTCTGATTTTCAGGAAAAATGATAGAAAAACTTC  
TTGCTTAAAGCGTATT TTTGAAC GAAATGTATTGATTGCTTATCAATAGCAATGCTACATTTGCGGTTT  
TCTCCAGGAGGAGGTGCATTACCGAATCCTTAATTCCTCAAGCGA TAAAGAGAACCGCATGTTAACTTG  
CAATGATTGCAGCACGTGGGAGCAGTTCGTTAATTATAT TAAAACCCGCTGCTC TAAAACAGCC TTTGAA  
AACTGGATTGCTCCTATCCAAGTACTAGAAGAATCTAGC GAAAAAATTCGATTAGAAAATCCCAACATAT  
TTGTT CAAAGTTACCTCTTGACAACATA TAAAAAAGATCTTTGCTCC TTTGTGCCCTCTCGATGCCGAAG  
AAA TCCCTGCCTTAGAATTCGTTGTTGCAGAGAT CAAACGCTCTTCTCC TTTAGTAACTCCGCTCTATCGCT  
AAGCCTGCTACAGAAG TTTCTGAAGAGAATAAA GATTTTCAGCTTAAGCTTAATGGAGCTTATCG TTTTCG  
ATAA TTTCAATTGAAGTCCATCCAACCAATTTGTAAAATCGGCAGCTCTAGGAATGCTGCTCGTCCAGG  
AAGATCGTATAATCCTCTATTTATTCATGGTGGAGTCGGATTAGGTAAGACGCA TTTGCTTCATGCTGTA  
GGACATTATGTTGCGAACATCATAAA AATCTCCGCATACACTGTATTACAACCGAAGCTTTTATTAATG  
ACTTGGTTCATCATTTACGTGTAAAATCTATCGA TAAAATGAAA AACTTTTATCGATCGTTAGATTTTACT  
TCTCGTCGACGATATCCAGTT TTTGCAAAAACCGC CAAAATTTGAAGAGGAATCTGCAACACCTTCGAA  
ACTCTGATCCACTTGTG CAAACAGATTGTTGTAAGTGTGACAAGCCTCCAGGACAAC TAAAATATCAG  
AACGGATCATTGCTAGAATGGAGTGGGGCTTGTGCTCACGTTGGAGTTCCTGATTTAGAAA CTCGAGT  
TGCTAT TTTACAGCA TAAAGCTGAA CAAAAGGAT TAAAATATTCCTAAT GAAATGGCTTTTATATAGCA  
GATCATGTTTACG GAAATGTCCGTCAACTTGAGGGTGCAATTA TAAACTCACAGCATACTGTCTCTTAT  
TTAATAAGCCTCTAACAGAAA CAACTGTCCGAGATAC TTTAAAAGAGCT TTTCCGCGCACCTTC TAAACA  
AAAAG TTTCTGTG CAAAATGTTCC TTTGGCTCGACAAGTTGCCATGTATTTAG CAAA AACTCTAATTA  
CAGATTCTCTTGTGCAATCGGTGCTGCT TTTGG GAAA AACTCACTCAACAGTTC TTTATGCGTGCAAGAC  
AATTGAACAGAAA ATAGAAAAGACGCTCTGCTAAA AATCAGATTAGCTTATGCAAGAATAATATAGCG  
ATAGACTCACCACAACACT TTTGTG TAGTCTT GAAAAGC TTTCAATTAT TTTACAGAGACCGTCTTATGTGG  
GGAGAGGAATGTT CAAAAGACCTG CAAAAAATTTCTTTGATGAAGTC CAAACTCTGTATGAGGATAGTGG  
CGCCAACTCCACGAGTTACAGTATATATCCC CAAA GAACAGAACG TTTAGAAAATCATT CAAA TATTTT  
GAACCAGCTAAGCCCGCG GAAACACGATTGCTATCTCAAGAAGAACATTTCTCAATGGACTGATCAACAAG  
AAGGACTCGCAACTCAA GAAAGCTCCTTCCC GGAAGAACCT GAAA CCAC TTTAGGTGAGGGAGTCTCT TTT  
CAAA GGAGAATTAAC TTTGAGAGACTCCTTCGTATTGACGGGACGTTCTGAAGGTATTCTTGTCTCTAAA  
GGAAA GATTATTGTTGGCCCTCAAGGATATGT CAAA GCCAATATAGA ACTTGAAGAAGCTGTGATAGCAG  
GAGTCGTTGAAGGCAATATTACAGTAACTGGAAGAGTATCTCTTCAAGGAAGAGCTATGGTTACAGGAGA  
TATTCAAGCAGGAAGTCTATGTGTGGATGAGGGTGTACGCCTGTGTGGTTATGTCTCTATTCAAGGAGCC  
CCCTCTAATGAGCAAGAG GAAA TAGACTCATAAA AATCGCGTTGTGCGGTACTTGGC TAAAAA TTTCTTC

GCGCACTCTTCTAT TAAAAGGATAAGTAGAAA GAATGCATATGT TTTCTGCTGAGTC TAAAGCTTTTCTT  
TTC CTATAACCAAGATCTCT TTTGCAAGGAAC TTTCAAATATCTTGCTATAGACTCCACAATG TTTCTCT  
CTATGTCT TTTGAA GAAAAGATAATCCGATCAATTGAGCACTGA TTTAGTATTAGAGCTCT CAAAGCAGC  
TTTC GAGAAACTCTGCTCTCCACTTCTATTCCC TAAACATGCGCAACGATA TAAAGCTAATGTCTCAGGC  
ATAAGCTCATA CAAA TATAAAGAGAGATGCGGAGATAAGGCTGAACAAGTAGAACAGATCGCC GAAATCT  
CCCCATATTCAACG TTTCTAAA CACCTAGTACAACGATTATCG TAAATACG TTTACTACATCGCCGCCA  
ACAAGATAGA CAAA TCTCTCTTCTGGAGC TTTACAAA TGCAG CAAA GACTG GAAATATTTG TCGAATA  
A CAAA TATTAGAATCCTA TAAACAACCGAGTTT TTTA TTTG TAAA AAT TTTAATAA TTTGTTACGT TTTG  
AACGTGTAACGTTCTCAACCT TTTCTCTCAGACACAATGCTC GAAA AACTTGTGCGATTCCCT TTTGGAAAAT  
TTG TCG TAAAAG CAAATTTCAACACATGACGCTATCGCAGATGCTGTTGATACT TTTGCTTCGAGCCT  
CTACACACCCCATCTTCTCCACCGTTCTGTTAGAGATGCTGTTGACGTCAAGCGTTGGATGATGTTGGTTG  
TAATTGCGCTCATGCCAACGATC TTTG CAGCCGTCTGGAATTCGGGTCTACAAGCTCTGGTCTATCAATC  
CTCTAATCCACGAATCATGGAGGCATTTCTACACATATCTGGA TTTAAGAGCTATT TTTTCATTCTG TTTCA  
CAAGAGATCGGTATAGGATCCGTCTTT TTTGCTGGATG CAAAAT TTTCTCCCTCTCCTCTTCATTAGCT  
ATGCTGTAGGAGGAAC TTGCGAAGTTCTTT TTTGCTATTATTTCGTAAGCATAAAA ATAGCAGAAGGACTGTT  
AGTAACAGGAATGC TTTACCCGCTAATCCTTCTCCTACTATTCTTATTGGATGGCTGCCCTTGGCATT  
GCT TTTG GAGTAGTTATGGG GAAA GAAC TTTTGG GCGGCACAGGAATGAATATTCTCAACCCAGCCTTAA  
CAGGACGAGCT TTTCTATTCTTTA CATTCCCTGC TAAAATGAGTGGAGACG TTTGGTTGGCAGTAACCC  
TAGCAGAAT TAAAGAAA GCCTTGAACGATGAGCTC TTTGGCAGAGAAGAGCCA TTTTCGATGGAT TTTCT  
CAATCCACTTG TTTACAAATTTCTGAATTCGACTCCTCCATCCGT CAAACGTGTTACATCGATGCCATAG  
CCTCTAATATCT TAAATCTTGAACATGTTCTACCCAAGATGTTCTCCAGACTCAA TTTGCGACATGGGC  
AGAATCTTATCCAGG TTTAACAGTAGATCAAC TTTCTTTAGAACAAC TTTCAAAT TTTGTAAC TACTCCA  
ATAACCGAAGGAGG TTTAGGGCTTCTTCCCTGCACAC TTTGATTCTGCCTGTTCCCTTACTGAGGCTG TTT  
ATGGTATCG GAAAAT TTTCTACAG GAAACCTATTCT TTTGGAAA TATTCTAGGATC TTTGGGAGAGACTTC  
AACTGTAGCGTGCTTACTAGGTGCGGGCTTCT TTTGTTAACAGGAATCGCTTCTTGGCGAACTATGCTA  
TCT TTTGGTCTAAGTGCTTT TTTCTTTG CATGGTTC TTTAAAATCATGAGCATCTTAAACAACCGGAATG  
CTGGTGCTTGGGCTCCTG CAAAGTTC TTTATTCTGCCTATCGCCATC TTTGTATTGGAGGCTTAGCATT  
CGGGCTAGTATTTA TGCTACCGATCCAG TTTCTTCCCCTGCAATGAAGCTTG CAAAATGGCTGTATGGC  
GCT TTTATAGGAT TTTCTAACAATTTCTACACG TTTAATCAATCTGCATACCCCTGAAGGAGTTATGTTAG  
CCATCCTATTAGGGAACGTG TTTGCTCCATTAT TTTGATAACATTGCTCTTAAGCAATACAGACAACGGAG  
AATA TAAAATATGGCATCCAAGTCTCGCCATTATCTTAATCAGCCTTGGTACATTATCTTATTATC TTT  
GTTCTTAG TTTAATTGCTGGGACCTCCTGTCTTCTGTGTATTATGTCCTTGCACCTATCCAACAGCAAG  
CTGCGGAATTCGATCGCAATCAA CAAA TGCTAATGGCTGCACAAGTAA TTTCTTCCGATAACACATTTCCA  
AGTCTAT GAAAAGGGAGATTGGCATCCAGCCCTATATAATACT TAAA AAGCAGTTGCTAGAGATCTCCTCT  
ACTCCTCC TAAAGTAACCGTGACAAC TTTAAGCTCATAT TTTCAAAC TTTGTTAGAGTCTTGCTTACAG  
ATACACAAG GAAA TCT TTTCTTCATTCGAAGACCATAATCTCAATCTAGAAGAATT TTTATCTCAACCAAC  
TCCTGTAATACATGGTCTTGCCC TTTATGTGGTCTACGCTATCTACACAACGATGCAGCTTCCCTC TAAA  
TTATCTGCTTCCCAAGTAG CAAA AATCCAACAGCTATAGAATCTATAGTTCTTCCCTATAGAAGGT TTTG  
G TTTGTTGGGACCTATCTATGGATTCCCTTGCTCTA GAAA AAGACGGGAATACTGTTCTTGGTACTTCTTG  
GTATCAACATGGCGAGACTCCTGGATTAGGAG CAAA TATCGCTAACCCTCAATGG CAAAAAA TTTCAGA  
GG CAAA AAGTAT TTTCTAGTCTCAGTCTTGGAGAAA CAGAT TTTGCTAAGACAACCCTAGGACTGGAAG  
TTA TAAAAGGATCTGTATCTGCAGCATTAGGAGACTCACC TAAA GCTGCTTCTTCCATCGACGGAA TTT  
AGGAGCTAC TTTGACTTGTAATGGTGTTACCGAATCCTTCTCTATTCTCTAGCTCCCTACCGCGCTTTG  
TTGACT TTTCTTCGCCAACTC TAAA CCTAGTGGAGAGTCTCATGACCACTAA TAAA TCCTACTTAACCTAT  
TTTACAGATGCGTTGTGGATCAACAATCAACC TTTGATCGCTATCTTAGGTATCTGCTCAGCTCTTGCGG  
TTACGACTACGGTGACTACAGCTCTAACTATGGGATTCGCGGTTAGC TTTGTCACTGGCTGCTCCTCTTT  
TGTTG TTTCTTTGCTTAG GAAAAT TACTCCC GAAA GTGTTGCGGATGATCGCTCAGCTAATTATCATTAGC  
CTAT TTTG TATCTTAATTGACCAGTT TTTGAAA GCTTT TTTCTTTACTA TTTTCGAAA ACCCTCTCCGTT  
TTGTTGGATTAATCATTACTA ACTGCATTGTCTATGGGGCAGCA GAAA GTATGGCTAGACACG TTTCCACC  
TATTCCAGCGTT TTTAGATGGATTAGGATCTGGCCTCGGCTATGGGTGGGTACTTG TTTGCATTAGTATC  
ATTAGAGAGCTA TTTGCTTCGGAAC TATTCTAGGA TTTCTGTGTCATTCTCCT GAAA TTCTATACGCTTCAG  
CAGCACACCCTGATGGATAC GAAA ACCTAGGTCTGATGGTT TTTAGCTCCATCCGCATT TTTCTCTTTAGG  
AATCATGA TTTGGATCG TAAA CATTATTAGAGCTC CAAAGACAAA GAGGTAGCG TTTA TGTGGTTGGGAG

ACTATTC TTTAT TAAA TCTCTTAGGGATCTTT TTTA CAAGCCACG TTTA TTCAGAATAT TTTG CTGTCCAC  
ATT TTTA GGAATGTGTAGCTA TTTG GCCTGTTTCATCTCGCTTGTCAACAGCCAACGGCTTGGGGATGTCT  
GTGGCTCTCGTGCTTACAATTACAGGAAGCATTAACTGGTTGGTACATTAT TTTA TCA CAAA ACCGGCG  
CCTTGGCTTGGTTATCACCTGCATTAG CAAA ATATTGATCTCAGCTTCCTAGAATTAATCATG TTTA ATTGT  
TGTTATCGCAGCATTACACA CAAA TTTA GAAGCTGTCCTC GAAA GAT TTTT CAGAAA CC TTTA CCTAGCT  
TTG GGAATA TTTT CTTCCCCTTATTGCAG TAAA CTGCGCTATCCTAGGTGGAGTATTA TTTG GAATTACTC  
GAAA CTATCCT TTTT C TGCCTATGGTGGTATTCTCCTTGGGCTCAGGATGTGGCTGGTGGCTTGCATCGT  
TCTT TTTG CAACTATTAGA GAAA AATTAGCTTACTCCGATGTTCTCAACACTTACGAGGGACAGGGATT  
TC CTTT CATTACGACAGGACTGATGGCTATGGCT TTTA TGGGATTAACAGGAATTGATA TTTT CAAA CCCA  
CAACATC TAAA CCTGCA TTTT GTCATGAATATAGCCACTGATAGCCACAAC CAAA TACACATTCTAGCTC  
AGAAGAACCCAAGGCTTCATAAAA TGGCGGTTAATAGCCGCC TTTG CTAGGGTTC TAAAGAAA AGC TTTT CG  
CTGCG GAAA TCTTCGGTGAGTTGTAGAACC CAAA CCATCCTTCTGATTCTGTGGCATTATTAACAGGAA  
GAATATCATCTTCAAGAGCTGTGTTGACCTCTAACACTTCTCCA GAAA CAGGA GAAA GCACCTCAATAGC  
TGAC TTTG AAGATTC TAAA ATACA CAAA GCTCCTCCCCTTC TTTA TAAA AGAACCTACAGAAGGTAGATCT  
ATGTGCAAGATATCCC TAAA TGCTCCCGCAT TTTG AGACGATAAAA CCAAGT TTTA CTATTCGAGAATGAA  
TCGGTTCATCCATACATGATAGTCAGAATAATACT TTTG CCCC TTTT CATATTAGTCC TACTCAATCC TTT  
AACTAGGGTGT GAAA AAAAACTTCTTC CAAA TAGGGTCT TAAA AATTCTCATTCAAGTGACT TTTAGC  
AAA TAATAGCTTATCTAGGCTTACTGGATAATCACACAAGACTTG GAAATAGCAGTGTAAATAGAAA GGG  
CC TTTA TC CAAA TCGAATAACACATCGGATACTTACCTTCT TTTA AGG CAAA CATATCTTCGAACTCTT  
GAGGGCCCCCTGATCACCTCTA GAAA ACCTTTCATGGTT TTTT C TTAGTCCCC CAAA AAGATCTCCCTG  
CGCTAAT TTTT CTG TTTG GAAA GC TTTG ACAAA TCTAAC TAAA CGTCTCTGATA TAAA TCTTGGCCCTGA  
CTAT TTTG GAAA AGATCTTTCGAGATGCGT CAAA ACACGACTAATGCGCTCTTCTGCT TTTG TAT TTTT CTCTA  
ATAGAAC TTTT CTTA GCC TTTG CG CAAA ACTTC TTTA TACGG CAAA ACCTCATCCTTATCTGCGGACT  
GATTACACTAATGGAATAGAAA GTTTCATTATCTTGAGTATAGCTATCTACAGAATCTTGCTGCATCAGC  
ACATTAGC TAAA CGAACACCGTCTGAATACCTGGTAACACATGATCCTTACCTATAGACAAGAAA AGTT  
CTTCTCTTGGCGCTC TTTT CTTAGCTAATT CAGATTGAATCCGCTCTGGATCTGCACGAAGAATTGCTTT  
TC TTTACATAGGAATGGGC TTTT C TACGATAGTAGG TTTT CAAA TTTA AGATATCACG CAAA GAAGAGCTT  
GTTT C TAATTCTGGGAATTCTAAT TAAA ATTTT CTT CAAA ATTTT CAGGAT TTTG ATACCCTGGTAGACTT  
GCGCCATCGGCACATATT TTTT C TAGATCCGCTAGT TTTT ACCTCTGATAAGAAA CAGC GAAA CGT TTTT C  
AACCAGACACTCGGC TTTT ACTTCTGACCC TTTT C ATTTGGGAAGGCT TTTT GTAGGACATCTAAAACATGG  
ACAGAAG GAAA AGCTGT TAAA TGAAGGTAGGTCT CAAA AGCTTC TAAATCTTCT TTTG TCCTT GAAA ACTA  
AACTATCCGGTAAA TGGAATAACTCCACAGATACCGAATCT TTTT C CCAATGGAGAAGA ACTTCTG CAAA AG  
ATAGTAATC GAAA CTACAGCCCCCTTCCAGAGATAAAA AGAGCTTT TTTATATAA CAAA ATTTT C TCGATAC  
ATACCGA GAAA ATCAGACTCTTCTACCCCA TAAA AGCATAAAA AAGAGGCCACTA ACTGCTCGAATGT TA  
AAT TAAA CT CAGCATG TTTT ACTAAGTCTGG CAAA TGCATGCTGCGC TTTT ATCA TAAA AATCTTGGCGAGC  
TTCT TTTA AAGAAGGCATCCCAACCTTCTTT TTTG CTCATCTA TAAA ACATAACATTGCCTCTGTAACA  
GAA GAAA TGTACTTATCCC CAAA CCAATC TTTT C ACATT TTTA TATCCGAATAGACG TAAATCACGACCTT  
GAAC CAAA GAATTGTCGACTGGAAGATTGAACATCTGACGACGATATCCAGCA TTTG TCTAAGAACGTA  
GTGAGGGAATTTTT TTTT C TTTCTAAGAACAGCCTTACTCGAACAG CAAA CCCTTCTGGAGAGACTGGATCA  
GTCAATTGCTGGAATATATG GAAA GCCTCTCGTAATTGAGGCGCGGAAGATTT C CAAA CTCTCTGAA G  
AAATAAAA AGGAGCATCGAATCGCCGATACCCTTCGTAACCTCTCT TTTAT CAAA AGCTG GAAA TCCAGA  
CTTGTATATACTCAGGAAGAGCT TTTT C CCAACTTATTCGTTA GAAA ACCTCGGTTAA CAAA CCCTCA  
TTAA GAAA ATTCCTCCTAGGATTCCTG TAAA AGGATAGGCTTCATTGGA TAAA AATGT TTTT CAAA  
GAAGGAATCTTT TTTT C AGAATA TTTT C TACCCGAAGGAGTTCTATAGACTGT TTTT ACCAGATCCTAATTT  
GTTT GTTTT C TTAACGG TTTG ACCAACGCCTACGCCA ACTCCAGATAAACA AAA CGCCAGCGATAACTAGT  
CCGATAAACTTCT TTTG ATGCTGT TAAA AATGCTAACAAGAGACCCTTCTTT TTTG AGAACAACTCCTT  
TTAA GAAA AAAAAAG GAAA ACTACTTCTACAGAATCC TTTA CCGAAGAGA GAAA GAGATCCCTCTAGAATA  
TCTCATGGTACTTGTGCGTAAGATTATTATCAAGT TTTT C ATGGA CAAA GACCTAAGGGAGGATCTGTAC  
AGATCCCTCCCTCCTATTAGAAGAGTTAAGATGGCATGTATCTCTGTTCTAAGTACC TAAA CAATAATG  
TACAGGAT CAAA ATACCAG TTTA TAATGTCATCATGAGTCACTGA TTTAGAAA GTCG CAAA TCTTTT C A  
AA TACTACCTGAGC TTTAGAAA CCGCTTCT TTTG AATCAATCACCACAATGCATTCGTAATCGCAATCGT  
TACTCTTC TTTT C CAAA ATTTGTAATGCCTATAAC TAAA ATATGATCATCTACAAGCATGCACTTT TTTA TG  
CAGTTGTGATTAGCTACA TAAA ACTCGCTCACA TAAA ACTTTCATAGAGGCTCGACTGGGAGAATA CAAA

AAGCGTTCCCA<sup>CAAA</sup>AGCGGCCGAGAACC<sup>GAAA</sup>GTCAATGG<sup>GAAA</sup>TAATTAATTCGAT<sup>TTTC</sup>CCCAAGCAT  
AGCTTCTAGTGA<sup>TTTC</sup>GGGACTCCGATCCGTTCTCCATTGGTTAC<sup>TAAATAGA</sup><sup>TTTC</sup>TACGCCCTCTATC  
CCAGCAAGCAGCCATGAGACTATCATATAT<sup>TTTC</sup>GCTACCGGAA<sup>TAAAAAACATCTGCGCTATCCGATA</sup>  
GAATGTTGAGCTTGGTTAATCAGCCGAACATATTTCTCAGCAATCGTGTGTTGATTTCATCCGGTCCGG  
<sup>AAAAGA</sup><sup>TAAAATGCAT</sup><sup>TTTATC</sup><sup>TAAA</sup>GGTACAGATACAGCA<sup>CAAA</sup>GGCTCGTCTCAATCATAGCACAGAA  
AGAGGATCTAGCTT<sup>TTTC</sup>TATAGAAA<sup>GATTGATTGGATCAATGCCTC</sup><sup>TAAA</sup>ATCATCTAATTT<sup>TTTGTTT</sup>  
<sup>AACCATAGTT</sup><sup>TTTG</sup>AGT<sup>GAAATCCTTCCA</sup><sup>CAAA</sup>GCATAGTGAGCA<sup>CAAA</sup>ATTCT<sup>TTTC</sup>TCAGCAATGCTC  
CATATTTCTCCGAGACAATCGTTACATCTTGATCTCGCATAGCTGAAGGCCGAAGCACTCCTCCTATCAC  
AGCACGAGGGGAATCAGAGACTTC<sup>TAAA</sup>TCCACATCCCC<sup>TTTA</sup>GAACATTGAAGATCCTCT<sup>TAAA</sup>TTTGAA  
CCTCCGA<sup>TAAA</sup>AATGTACTTCCCATCAACAATGGACAACCTTAGTATGCGACTCTGTCACGTTAGG<sup>GAAAA</sup>  
ATACATTACAATACGGCGGCCAATCT<sup>GAAAACAGGTA</sup><sup>GAAA</sup>AACCTGTCAGGATAAT<sup>TTTC</sup>TTGCAGAGT  
T<sup>TTTAAA</sup>TTCTTCCGATCATTATCATCAATACATGTAGGTTGGACCAATATGTAGCTTACAAGCGCAGGC  
ACTTCTTCCATACGCTGCTCCAAGCGCTGAAGAAGTGTGGA<sup>TAAA</sup>ATCTCTCCTCCTGC<sup>TAAA</sup>CAAGGAC  
ACAATTTCTACAGTATA<sup>TTTAG</sup>CACTACTAATAGCGGCCAACAGGTGTTTCGTACA<sup>TTTC</sup>CATAGCCGTTATC  
ATGAATAAGAACCCTTAGCTTT<sup>TTTG</sup>TCTCCATCCGGAATAGCTATAGTGTGCG<sup>CAAA</sup>ACCATTCAACGAG  
ACAACACAAGCTA<sup>CAATA</sup><sup>CAAA</sup>TAT<sup>TTTC</sup>CGT<sup>TAAA</sup>AAAGCCAT<sup>TTTC</sup>CATCCTTAT<sup>TAAAT</sup>CCCCCTCCTG  
CAT<sup>TAAA</sup>GATCCGCAT<sup>CAAA</sup>GAGTC<sup>TTTA</sup>ACCTCT<sup>TTTC</sup>TAACCTCT<sup>TTTA</sup>AATACTGTTGAGGATGCTTCC  
ATCCCTAATGGG<sup>GAAAA</sup>AAAGCACTCTTCTCTACCTCAGGTCCGATCTTATCCACAAGGTCTGGAAG<sup>CAAAA</sup>  
TAT<sup>TTTC</sup>GATAGAAA<sup>TCAAGAGAATTACCAGATA</sup><sup>GAAA</sup>GATAGAGCCCTGATG<sup>CAAA</sup>AAGCCTTG<sup>TTTC</sup>CAC  
AGACC<sup>TTTG</sup>AGCCGCTCCTCCTACT<sup>TTTC</sup>TAT<sup>TTTC</sup>CTATAAGAACGTCGTAT<sup>TTTA</sup>GAAGTT<sup>TTTG</sup>CCACA  
<sup>CAAAA</sup>AATTAGAAGACTCTGCTCGATCAGTAGATACTTCAATGGGTGATAACGAACCTTCCAATC<sup>CAATA</sup>  
ATTTATTTGATTGCTTTCAGAAC<sup>CAAA</sup>ACGATTGACCGTATGATAGTTCCGAGGATAGAGTCTTGATATAA  
GGGATGTTCTGAAGACAC<sup>CAAA</sup>AGCGAGAACCGTAATCACTATTAT<sup>GAAA</sup>TGTAACACCACCACCTGTC  
GGACGACTTGCAGCGCTTACTCC<sup>TAAA</sup>GATTCCAGTTAGCC<sup>TTTA</sup>AGAATCTCTCAGGCTTAA<sup>TAAAGC</sup>  
ATCCATAAGT<sup>CAAA</sup>GG<sup>GAAA</sup>ATCCCTTCCCACTCATA<sup>CAAA</sup>TGAAGAATGACTTCTCCC<sup>TTTC</sup>T<sup>TAAAGA</sup>  
GTCTAGAAG<sup>CAAA</sup>CGATCCT<sup>TTTG</sup>CATGAGATCT<sup>TTTA</sup>AGGAGTTCTCTAATAGAATCAATGACACGCGTT  
CTCATTATTCAAT<sup>TAAA</sup>TATCTATAACCATTCT<sup>TAAATAAA</sup>CAGACAGAGAACAACCTTCTCCCG<sup>TTTATTTT</sup>  
ACG<sup>GAAA</sup>CATATTACATCAGAACAGTGATCTAA<sup>TAAA</sup><sup>TAAA</sup>TAAATGCCTGACTCT<sup>TAAAAA</sup>AGCTTCT<sup>TAA</sup>  
<sup>AAATT</sup><sup>CAAAAAA</sup>AGTCTGCTATA<sup>TAAA</sup>AAGTGCT<sup>TTTA</sup>ATCTCCCAATTCC<sup>TTTC</sup>CC<sup>TTTAC</sup><sup>GAAA</sup>AGTTGCA  
TCATTATCAT<sup>TAAA</sup>TGTCGTATATGCTT<sup>GAAA</sup>AATATTCACCTTGCCATTGAGGTT<sup>TTTTATG</sup><sup>TTTG</sup>AGAA  
<sup>TTTTA</sup>CCAATCGCG<sup>CAAAG</sup>CAAGTGATTAAAGTTGGC<sup>GAAAAA</sup>AGAGGCTCAACGACTCAATCACAACAT  
CTAGGAACCGAGCACATCTTGTAGGATTACT<sup>TAAA</sup>ATTAGGCCAGGTTGTGGCTGTTAATGTATTACGCA  
CTCTTGGTGTGACTTCGATACAG<sup>CAAAG</sup>CACGAAGTAG<sup>GAAA</sup>GGCTGATTGGCTATGGCCCCGAGATTCA  
AG<sup>TTTA</sup>CGGAGATCCAGCTCTTACTGGAAGAGTGAA<sup>GAAATCT</sup><sup>TTTG</sup>AATCCGCTAATGAAGAAGCTGCT  
CT<sup>TTTA</sup>GAACACAATTATGTTGGAACGAACATCT<sup>TTTG</sup>TTAGGTATTCTCAATCAATCCGATGGAGTGG  
CT<sup>TTTG</sup>CAAGTATTA<sup>GAAA</sup>AT<sup>TTTG</sup>CACGTGGATCC<sup>TAAAGAAA</sup>TCC<sup>GAAA</sup>AGAGAT<sup>TTTAAA</sup>AGAATTAGA  
<sup>AACAT</sup><sup>TTTA</sup><sup>TTTA</sup>CACTCCCCCTCTTCTCCATCACTCCTA<sup>GAAA</sup>TACTAATAGCTCTTCTTCTTCG  
<sup>AAA</sup>TCTTCTTCTCC<sup>TTTAG</sup>AGGAGGTACAT<sup>TTTG</sup>GGCGGAGATA<sup>TAAA</sup>CCT<sup>GAAAAA</sup>CT<sup>TTTC</sup>AGCT<sup>TTTG</sup>AAGG  
CGTACGGTTACGACTTAACAGAAA<sup>TG</sup><sup>TTTAAA</sup>GAATCGCGCCTCGATCCAGTGATCGGGCGTTCTGCAGA  
AGTCGAACGATTAAT<sup>TTTA</sup>ATTCT<sup>TTTG</sup>TCGTCGAA<sup>GAAAAA</sup>ATAACCCAGTCTTAGTTGGAGAAGCTGGA  
GTAGG<sup>GAAA</sup>ACAGCCATTGTAGAAGGCCCTCGCTCAGAAAATTGTCTCAGGAGAAGTTCCCTGAAGCTCTTC  
G<sup>TAAA</sup>AAACGCTTGATCAC<sup>TTTAG</sup>ATT<sup>TTTG</sup>GCTCTAATGATTGCAGGAAC<sup>CAAA</sup>TACAGAGGGCAG<sup>TTTGA</sup>  
AGAACGCAT<sup>CAAA</sup>GCTGTGATGGATGAAGTTTCG<sup>TAAA</sup>CATGGGAACATCCTCTTA<sup>TTTAT</sup>TGATGAGCTT  
CACACGATTGTTGGTGCAGGAGCTGCTGAAGGAGCTATCGATGCTTCTCATATTC<sup>TAAA</sup>ACCAGCTCTAG  
CTCGAGGA<sup>GAAA</sup>ATCAGTGCATTGGCGCTACGACCCTAGATGAATACCG<sup>TAAA</sup>CATATAGAAA<sup>AAGATGC</sup>  
CGCT<sup>TTTA</sup>GAACGTCGGTTC<sup>CAAA</sup>AAATCGTTGTTCAACCTCCTAGCGTCGAT<sup>GAAA</sup>CAGTAGAAA<sup>TTCTC</sup>  
AGAGG<sup>TTTAAAGAAA</sup>AAATACGAAGAGCATCACAATGTCTTCATCACTGATGAAGCACTCGTTGCTGCAG  
CT<sup>TAAA</sup>CTCTCTGACCAATATGTTTCATGGTCGAT<sup>TTTC</sup>TTCCTGA<sup>TAAA</sup>GCAATTGACCTCTTGATGAAGC  
TGGAGCTCGTGTACGAGTCAATACGATGGGACAACCTTCGGACCTGATGCGTCTAGAAGCTGAGATA<sup>GAA</sup>  
<sup>AAAA</sup><sup>CAAA</sup>ACAAGC<sup>TAAA</sup>GAGCAAGCTATCGGAACCTCAGGAATAC<sup>GAAA</sup>AAGCTGCTAGCCTTCGTGATG  
AAGAGAAGAAGTTAAG<sup>GAAA</sup>AATTAG<sup>GAAA</sup>TAT<sup>GAAA</sup>CAACAGTGGGAGTCCAATAAGGAAGAACATCA  
AGTTCCCGTTGATGAAGAAGCTGTTGCACAAGTAG<sup>TTTC</sup>CGTA<sup>CAAA</sup>CAGGAATCCTGCAGCTCG<sup>TTTA</sup>  
ACAGAAGCT<sup>GAAA</sup>GC<sup>GAAA</sup>AACT<sup>TTTA</sup>ACCTTA<sup>GAAA</sup>CGACTCTA<sup>CAAA</sup>AGAAA<sup>GTAAT</sup>CGGC<sup>CAAA</sup>GTC

AAGCTGTTGCTAGTATCTGTAGAGCTATCCGTCGTTCTAGAACAGGCATCAAAATCCTAATAGACCTAT  
GGGATCCTTCCTATTTTGGGCCAACTGGTGTGCGGAAGACTTTATTAGCGCAGCAAAATCGCAATTGAG  
ATGTTTGAGGAGAAGATTCTCTTATCAAGTGGACATGTCTGAGTACATGGAAAATTTGAGCCACTA  
AGATGATGGGATCTCCTCCAGGATATGTCGGTCATGAGGAAGGGGTCATCTAACAGAGCAAGTCCGTCG  
CCGCCCTTACTGTGTGTGTGTTGATGAAATTTGAAAAGCACATCCAGATATTATGGACCTTATGCTT  
CAGATTTTGAGGCAAGGGCGTTAACAGACTCATTTGGACGTAAGATCGATTTTCGTAATACCATCATCA  
TTATGACTTCTAACCTAGGAGCAGATTTAATTTCGAAAAGTGGTGAATAGGGTTGGCTTCGTTCTCA  
CATGGACTATGCAGTTATCAAGAGAAAATAGATGCTGCAGTTAAGAAGCATTTTAAACCTGAGTTATC  
AACCGTTTAGATGAGAGTGTATCTTTAAGCCTCTTGAAGAAGACTTTTCAGAGATTATCCATCTAG  
AGATTAATAAGCTGGGCTCTCGTTTACAAAATCTCAATGGATCTTAATATTCTGATTTCAGTGAATTC  
CTTTTGTAACAAAAGGCATTCGCCGAAATGGGAGCTCGACCCTTAAGACGTGTTGTGGAGCAGTAT  
CTGGAGGATCTTTGGCAAAAATGCTATTGAAAGAGTCTTGCCGACAAGAAGCTGAAAATTACGCGCGC  
GCCTCACAGAAGAAGCGGTTGTTCGAAAGAGAAGAAGAAGCTGTTCTGCTTTAGCTATAGAAGGCGA  
TGGCTCAGAGCCTATTACAGCTGATGAATCATAGGCACTTCAATCACTCCTCCTCCAAAACAAATGTCCC  
CCTGGTAGAAAGCTACCGTCTGTCCAGGGGTGACAGCTTTTCACAGGGACATCGAAAATCACTTTTACCGT  
TCCATCTTCAAAAGGATATACAGAACAATTTCTCGTCAGGGGATCTGTACCGAACTTTAGCACTACAGATC  
ATAGGCTCCTGCAAGGGAAACAACAATTAAGTTCCCTTAGTAAAAGCTCTTGTCGATAAAGTAAAGGAT  
GATCTTCAACCCTTACAATGAAAACAATATTCTTTTCATATTCTTGCTAAGAACAATAACAAGGCTTTTC  
CATTCCTCCTATGTTAACCCCTCGACGCTGTCCAATCGTATAATAATGGGCTCCTTCATGTGCGCCGACT  
ACCTGTTGTGTATCAAAATCAATAATGTCTCCAGGAGAGTCTGCTCAAACTGCTCAAGGAACTCTTAA  
AAGGCCGTTTACCAATGAAGCAATCCCTGTGCTATCTTTTTTTGTTGGCGGTAGCTAAAACAGCTTCTTG  
AGCAATTCGACGTACCTCCGTTTATACATACCTCCAGGGGGAAAAGTACATTGGATAAAGCATCCTTA  
GGAGTGCCACATAAGAAATAACTTTGGTCTTTATTGGGGTCTATTCTCTGGACAACCCAGTTCCATCAG  
CCCCCTCGACAATAATGTCCCGTGGTAAAAAATCACCTTTTAGCTCAAGTACCTTCTTCTGTAAATA  
ATCAAAATTTGATTTTCCTGATTGCATAACACATCAGGATTGGGAGTGTAGCCGTTTCGATATTCTCTTAGA  
AATCTAGAAAACACTCGCTCTTTATATTCTTGAAGAGGAACTGTGTAATATGGAATGGACAATTGTT  
CTGCGATCCGCTCTACATCGGAAAATCTTTGGTTGCAGTACACTCACCATTCTCGTCTGCTCTCCCA  
ATTTTTCATGAAGAGCCCAACAACATTATACTCCCTTGTCTCTTTAAGAGATAAGCAACAACCGAGGAA  
TCCACTCCTCCAGACATAGCAACAATGACAGTTTACGCACAATGAACCCAGAAAACGCTTTTCGTTTATT  
GAAGTTTGCACATTAACAAGGGCCATCATGTTAGCAAAAAATAGGATCAAAAAACCTATTTCTCAAGC  
CGCTCTTTTAAATCTTAATTAACAAGACAAATTAATTCAATTTTTCAAAAAAGAAATTTAAACATTAA  
TTGTTGTAAAAAACAATAATTTATTCATAAATAAACCATAGTTACGGGGGAATCTCTTTTCATGTTTA  
TTTATGAGCTCATCAACCTAGGCATACGCCAAAACAATTCCTTTGAAAGTTTACCATTCTGTTCTCCGAT  
AAGCATCCTCAAAATGCTAAAAGCTATGTGGATTACGGGGATAGCCCTCGCAGCTCTATCTCTGCTCGCTG  
TAGTCGCTGCGTTATTGCGGTCTCTGCGGGAGGAGCTGCCATTCTTACTGTCGTTGGTGGAAATGC  
TGCAATGTCTGGCCTCTTATCCGCTGCCACCATTATCTGTTCTGCAAAAAGGCTCTGGCTCAACGAAAA  
CAAAACAACCTAGAAGCGTGCCTTCCGTTAGATAATGCGACCGAGCATGTGAATTACCTGACCTCAGACA  
CCCCCTTATTTAATCAATGGGAATCCTTAGATGCTCAAAATAAGCAGTTGTCTCAGATTGACTTAACTAT  
TCAAGCTCCCAGAAAATAAATATTAAGAAGTTCTTGTTCCAGATACGATTCCATTAATCACTCCATC  
GAAGAGATCTCCGATCGCTTTACGAAAATGCTCTCTCTCTTCGATTAAAGAGAACATTTTATCGAGGAG  
AAGAAGTTATAACCCCTATTTAACCCCTCCTACTTAAAAAGAATCGTTTGCTGATCAAAATCACATC  
CAATATGATTAGGATGCTACAAAATCCGGTGGTGTTTTTTCCTCAAAGCCAATACACTAAGTCATGCC  
AGCCGCACACTATATACAGTATTGAAAGTCGCTTTATCCTTAGGAGTTCTCGCTGGAGTCGCTACTCTTG  
TCGCTTTCTTCCCCCTAGCCTGCCTTTATTCGCTGTTATAGGAGTATCTTCTTAGCATTGGGGATGGC  
ATCTTTCCTTATGATTCGGGGCATTAAGTATTTGCTCGAACATCTCCTCTGAATAGAAAGCAGCTAGCT  
AAAAGATATTCAAAAACCAATTAGCCCAGATGTCTGGGCTCTATGGTTTATTACCAGCATCAATTACTAT  
CACATCTACATGAAACTCTATTAGATGAAGCCATCACAGCTAGATGGGGCGAGCCCTTCTTTAATTGAACA  
CGCTAATCTTAAGGCAAAATTTGAAGATTTGACAAAACAATATGATATATTGAACGCAGCCTTTAATAAA  
TCTTTACAACAAGATGAGGCGCTCCGTTCTCAAGTAGAGAAAAGAGCTTACTTATTTCCAATTCTTAATA  
ACGACGAAAATGCTAAAACAAAAGATCGCAGCTCTTAGACTCAAAAATGATTCAAAATCTGAAATTTCA  
GGAGATTATAAATAAAGGACTAGAAGCTGCCAAATAAAGCAGAGCTGACGCTAAGTCAAAATCTATACG  
GAAGACGAAACCTCTGACAAAAGATTCTCTATATGGAAACCAAAAGAACTTGGCATTAGAAGAATTTGT  
GGAGAGTGCATGATGAAGCTTGAATGAAGAGCAACAAGCTCTCTTATAAGATTATATGAGTTATAA

AACCTCAGAATGTCAAGCTGCACTC CAAAAGTGAGTCAAGAACTGAAGGCGGCA CAAAATCATTTCCCA  
GTCTAGAAAAGCATGCTCTAGACAGATCTTATGAATCCAGTTTA ACCATGATGGATTTAGCTAGAGCGA  
ATCAA GAAACACACCGGCTTCTGAACATCCTCTCTGAATTACAACA ACTAGCACAAATACCTGTTAGATAA  
TACTAACGGTTCTTCA TAAATGA CAAAAGAAA AAGGAGAGCTGTTGCTGTGCTCTCCTTTTTC TC TAA  
ATATTCCTGAAA GACTAACCTTTTATGTTGTTGCGTTGAGCCTCCTCCTCCTGTCCCGAGGAGCCCGCAA  
CGGTAGAGTCTGTAGCATTAGAAA TGATAACAGCTCCTACGATCATAGCAATGACGGTAACCACCATAGT  
ACATACA GAAATACCGAAGTTAGCTCGGCGTTTC GTAACACAAGAAGAGCAAGGCCAGTCCGTCTCCGAA  
GAATCACACCGGTATTGATGAGCA TTTAGATAGGACATAACATTAGTATTA TTTG TAGAAGCTGTAGCTG  
CGAAGTAATTCTCTGGCTCCTTATGCGCCTG TTTG GTTGGAGCTGCGGCAACAGCTTCTGCAGC TTTCTC  
ATCAGCCTCAGGTTTC TCCGTCTTTGCTTTCTTTGGCTTTTGAAGAGCGGCTCGTTGTCTTGCTCTAGCA  
TTTA CAGAATTTTC ATTGCGTTTACACGTGTAGTCAAAGCTTTTC TCCGCATCATAGCGCAATGTAGAAG  
TAATACTTCCGTCTCTTTTAAGATTCTCACTTACCGCACAAAGCCGCACGCCAGATTTACGAGCAGTCTT  
TTCTTCCTGCTAACCACTCACGAATCAATTGACGTTTTCTTCTGGAGAAAAGAGAAGCTCGAGCAGCAGCT  
ATTGCTGCTTCTTTAGGACTCAATTTCTACTCTTAGCAAGAGAAGTATTTACAGGCTTTTC TTGAGAA  
GCTTTCTTTTATCATCTCTTTTACTATTACATAGCCAATC GAAA AATTTCTTCAGACTGAGTTGTTTG  
TCGTTT TTTAGTCTG TTTGAACCACTACTCGAGGCTCTTTACCTCGAGCCTTGTCTCTTTTTTTCGCAGTT  
AAA CGTCTCATGATTTCTAGAGAACAATCCATTTGTAATACAA GAAAAGAAA TCCTTTTC TCAAAG  
AAGCCTTCCATGCAGATTTTC TAGAAGCACATCTTTT TTTACGAAGTTT TTTAAGAGCCTGTCCAGAAAC  
TCCCCTGTCAGCCTGCAATGCCTCTTCCGCTTGTGCTTCCATAATAGTAGGAAGAG TTTGGCTCATCTGA  
CTTGCATGACCCATAGTATGGGT GAAAGTCAATAAGATC GAAAGCATAGCAAGTTGCGAAGTAAGCTTGT  
AACCCAGCATGACGGCAC TTTCTCCTAGATCCACCTTAGGGATCACCATAGCAACAT TAAAGCTTTTTTC  
ACAACCTGGACGTACAATTTCTTTT TTTATTGATAACTTAATGAA TTTGAGCTTCCCAATTTTTTA CAAAA  
GCTAAAAGCTGTGGCTGATCCGGATGCTCCTTAA GAAAGAGTCTGAGCTTGAATAGACATGCCTAAGTGCA  
CGATTTTATTACACAAGATT CAAATGA TTTCTATCTTGATTAGCGAATAAGAAGAACAGAGTATCAACAGG  
CTTACCCTCAAGCGCTCCATATTCAATGCTTTTGAGATAA GAAAACGGGAACAATAATATCGTACCCAACG  
TTAATCAAGAAGTCTTAGCATGAGG TAAAGCAATTCCTCTCCGATACCTGTAGACATAAGAC TTTCCC  
GATGCATAAGCATCTCGAATAGAACTACCGGATCCAACCTCGAACTTATTAGCTATATAATGAGCAGCATA  
CCGTAGGGCGCCTTCTTACTATCTACAAGAACATTT TTTAGAACCCTCCCTA TAAATAGCTCGATAT  
AGGCTATATCTAAGTGA CAAATCCTTGGACTCCCTTT TTTCTCTCGTT TTTCATCTGGAATAACCCAT  
GATTGTGGATAAGCCAGTCTTCTACTTCTTCTCTATT GAAACGCAACTCATCGTTAATCGTGTAAC TAGG  
GATTCCCTCCACAAGATACCCATTGTCGGATAGAATCTTCTGTACATCCAATAATACAGCTAACTGATCT  
AATCG CAAATCCATAACTAGACTCCT GAAAAAACACTCATAACTCTTCAACAG TTTGC ACTTGTAAAGAG  
TTGTGATCTTCTGGCTTTCATCTCG CAAAGATTGTGTTAATGCCGATAACAG TTTCCAGATATTTTGAAGGG  
GCATCAGATGGCCCTCCAATAA GAAAACAAGCCGCACAGACAACCCGTCTATAGCATCCCA CAAAATAC  
CCTCTGAATGGATGCCTAGAGCAA TAAA AAAATCTGCACCTCCATCGAT TTTCCATGAGGAATAGCTAC  
TCCCATAACCGATACCTGTAGACATAATATTCTCTCTTGCCAATAGAGCAC GAAAGAAA GCCTCCCTATCT  
TCCAGTAACCCAGCTCTGGCAGCTAGCTCC GAAAGTT CAAA AAGGATATCTTCTCTAGTATCTGAATGTA  
A GAAAGTGAT TAAA TCTGAT GAAA GTAACGAAC TAAA GTAACAGCTTGCTTATGGTCAGCAACGCAAGT  
CATCTTAACATTTCCAGTATGCC CAAATCCACCGGTTCCCGCGCCGTAGCGGTTAACTCTTCTTGAGT  
TTTCGACAAAAGACACTTGTTC AACCTTTGCTACAACAAGCTGTGCTATACGCATTCGGGTTCTACAATG  
AATGTAGCTTCGCCAAGA TTTGCTAAAATAACCCGAA TTTCTCCCGATAATCTGCATCGACAGTTCCAG  
GAGATTGAAGAACAATAACGCCGTACTTGCTAGCTAATCCACTACGAGAACGAAC TTGAATCTCGTACCC  
ATGAGGAA TTTCCACAGAAA TCCCAGTAGGAATCAGGGCTCTCTGCCCTGG CAAAATAGCTATAGGCTCA  
TTGATA TTTGCACGGACATCTGCGCCAGAAGCTCCAGAAGTAGCATACTCGGGTAAGGAGCTTCCAGACT  
CCAA TTTACAGAAA AATTTTCATAGAAGGCCCTCTTTTGAAGAGCCGCTATGATCT TTTATTTG TTATC  
ATCTGTCAA CAAAAAATCTCT TTTAATGGTCTTAGAGATATCTCTGGGGCAATTACC TTTGCCTCCAGAA  
TATGCC TGACAGCT GAAAAA ACTTAA CAAACTTTCTAAAGTTGT TTTGAGCTGT TTTCTCTCTACTACCT  
TATCAATCATCCCATGTTCTAATAGGAATTCGGAT TTTGAGCTCCTTCCGGAAGATCTTCCCCTATCAC  
CTGAGATACTACTCGAGGTCCAGC GAAACAAAT TAAAGCTTTAAGGCTCTGCGATAATCACATCTCC TAAA  
GAAG CAAAAGAAGCAGTAACTCCCCAGAAGTAGGGTTTCGT CAAAACG GAAA TATAAGGTAGCTTGGCTT  
CATGTAACCTTAGC CAAA GCAGCAGATGTT TTTGCCATCTGCATTAAG GAAAAAACAGACTCCTGCATCCT  
AGCTCCCCCTGAAGCGGAGACAATGATAACAGGCAACCGAGAGTCTATAGCCTTCTCTAT CAAA CGAGTA  
AGCTTCTCTCCAACAACAGCTCCCATGGAACCAGCCAT GAAA CT GAAA TCCATAACGGC TAAAGCAACAG

GATAACTTCGATTGTACAGGCCCGACTAAAACCCCTTCGCTATCAGGATTATCTTTACGCGCCTTCTC  
CAGACGATTGGGATAGGTATCTGTATCAACGAAATTCAAAGGGTCTTGCGAACGTAAATCCGAAAAATAAA  
GGATCCATGAATCTTTATCTGCCAACAATGCTATCCGTTCCGAAACTAATCCGATAGTGGTACGAAC  
ATTTGGGACAGCAATTAATAATTCTGTCCCAACTCATTGGCATGAATCATTTCGCTACAATGCGTACATTT  
TAGCCAGCCACTGAAGCCATCAGCTTTTATTTTTGAC TTTGATCTTTGGTTATCGTAAGAAAAATAAA  
CGCACAAAACCATCTCTTCAAAA AAATTGAGCAATAATTTTATTATAATTTTTTAACCGATCAATAA  
TAAAATTATTGCTTGCTCATTTCTACAAGCGATTCTCTATATAATCCCAATTAATTATGCTCGGGAAC  
TTTTTAGATAATCTATTCTCACATTTTATACTGGAGATAATATGCGTGCTCCACACATCTACTCCTAG  
GAGAGGGATCATCCCGTTCGTCGCTCTAGAGGATCCTGGTTGCTGTGGTCTGTACCACAAGCTCTTGT  
TTTTTGGGACAAAAGCTAACCATCCCCAGCCAGATCCTTGCACTGCAGCAGAAGAAGCAATAAAATTTT  
TTAAA AAATATCGAAAGAGCCCCAGAATTTTTCGATTAATTTTAGTAATTCATGACGAGGAGGAACCTC  
CCCTCCTTTCCCTTGAGGCGCAAGCATCTCCAAGAAAGAGAGTGGTTAATATGCCCTCCACCATTGAA  
CGCAGAGCAGGATTGATTGCGATTAGCCTTGTAAA TCTTGAGTAGCGTTTGCTACATCTAAACTTTTAA  
AGGCTCATTCAAA TTA TTTATATATCCTTGGTGATGCTTTTGATGATGCAGTTGCATAATCTCAGCACT  
AATTACAGGCTCTAAAGCATCGTAATCATAAGGCAATGCGGGAAGCATATAAGAAAGAAAGACCATAGCC  
ATCC TAAAAATAAGGTTACTATCCTCGCCACCTTCTCTATTTTCTACAGGCTAGCTAGATAGATCCCTC  
TAGATTATCAATAAAAATATTCACTGTCAAGAGCTATCCACATCTTTACGTAATGCTAAGAG TAAAAA  
AGGTGACTCTTGGTTTCTTTAATGAATTGTTGCAAGCTTCAAAACTCTCCTTTTCTCGAGCTTCACGGA  
CAGTTCGCTCTTTAGAAAATTCTGAAAAC TTTGCTTGATTTTCAAAATACAGCTTCATTTTTCGGCTCAGT  
TCCTGAAGGCCGTACAATTACTCTACAATCTCCTTCATAATAGAAAACAAAGCATCGACATCTTGGGTAAA  
GATAA TTTGTACGTAATATCGGTAAC TAAATCGCGTCTTCCCTGTATTGTAATTTTCAAAAGGCAATTA  
ATTTACGACTTGACAAA GACATCCGAAGAGGATCCTGTGTTTCCAACGATCCAACAGTTCTTGT TTTCCG  
CTGAGGTTGATCGATAGGAAGATCTATCGACTCTGTCCGGTTAGCATAATAGCCATAGACCTCATAAAGC  
TCTAACAGAGCATCTCGTAACGTACACCCTCGTATTT TTTGCTGCAACGCTGCCTCAAGAAATGAGCACCG  
CAGCAATCATAGCGTCTTTATCTTCTACATACGAGCCATACAGATACCATAAGACTCCTCTGCTCAAA  
AATAAA TCGCTCCATACCGGAACGCCATAATTCTATTT TTTACCTATATA TTTAAAGCCTGCACCAACA  
TTAACGATATTGGCTCCATAAGACTCTGAGATAGCTGT TAAAAGCTCTGTTGTTACAAGGCTCTTCACTA  
CTTTATCTTCCGCACC CAAAGGAGCCTTTTGAGACTCTTTACTCAAGATATGTGCGCCAATAAGCAAGC  
AATCTGATTACCGT TAAATCTATAAGGGCCTTCTTTCTCTAAAGAAA CCACCCTATTCTGTCCGAATCT  
GGATCTGTTGCGAT TAAACAAATCATCTTT TTTGCTCTACCATTGCTGAATACCCAATAC CAAAGCTTCTG  
GATCTTACAGGATTAGGAAGAACCCTGTAGGGAAGTCCCATCTGGAACCA TTTGTT TTTCAAC CAAAGA  
CACTGAAGAGAAA CCCC AATCTTTCAATATCCTCGGAATCATAGTTACTCCAGTACCATGTAGTGAGAA  
TAACTGATTTCGTAATAACGAACCATGCCGCGATTATCTTCTCGCATAACTGCAGTTTATGTAGAGTTT  
CTCTGATGTAATCTCCATATCCTCTTGAATCATGCGAATATATGGATGATCTAAA CTCTCTACAGCAGA  
GACCATCTCCACCTCTGGAACCTTCCATGATTTCTGATCCATGGGCGGAAGGACTTGTCTCTCTGTT  
GACATGTATAC TTTA TAACCATTGTAGGCAGGAGGATTATGCGAAGCGGTAATCATGACCCAGCTTTAG  
CCTGAAGCTCTCGCACTGAATAA GAAACTAACGC CAAAGGCTCTGGAATCTGAAATAAA TAAGCAAGAAT  
ACCGTTACCAGCTAAA ACCTTAGCAGTCTCTTGTCCGAACCTC GAAAGAATCATGACGCGTATCATACCCA  
ATCACAACACTAATCTTCTCATCTGGATATCTTCGC TTTAAGACTCGGGCTAAA CCGTGTGTTGCTCTCC  
TAATTGTAAAAACA TTTAAGCGA TTTG TCCCTATTCCTATGAGACCTCGTAATCCGGCAGTCC CAAAGGT  
CAACGTCTCAC TAAA TAACTCTCTCAATCGCTCAGGATCATTATCAAGCAGGGT TAAAACAGAGGTGTGG  
TCG CAAA CAACATCCTCAAGCCAAGA CAAAATGTT TTTGGCTGT TTTGAGGAT CAAA CATTCCCTCTATTT  
TCCTTCTAGGAATTTCTATAAGACAACCTTCCGATCAGAAC GAAACTCATCCACGCTCTAT CAAATAC  
AGATAAAGCGAGGACAAAACGGGACTATACGTCAGGCTTCTGTT TTTGTAAA AAATTTGCTTAACTTAG  
AAAGTGGGATATGCACAAAATC CAAAGAATTAGTTAG GAAATCCCCTGAGGAGAACCTAAGAATGATT  
GCTGTATCTCCTGCCCCCAGTC GAAACGCTCTGAGGATATTCTCCA GAAAAGAAA AGCCCCCAACCAG  
CTTTTCTCCG GAAA GG CAAAGCAGCACAGAACAATCACAGTCATCGAAGAGTA TTTCTTCTTGCTTTTG  
CACC CAAAGATCCCTAAC CAAAGCAACCCGTGAACGATGGGTAAGCTCAGCAGCTAAA TGATCTAAA CGA  
ACTCTCTTGACTATCATCTGCACTCCGGG TAAAGTTCGATGAACATTTCTCTCTCCAACGCTGAAGATGTC  
GATCC TTTAACCACGGCAACCTCC TTTAGAAA TAGCTTCAACTCCGCTTCCAACCTG TTTACAGTCA GAAAC  
AGGAGCCAACCCCTCGAATAGGATGTGCCCATGAT TTTGGAAA TAACGCTTGTGCTCTAGGTG TAAA ACT  
GCCCTCATACTCACTTA TTTAGGGCAA TAAACTC GAAAGTACTATAGACT TTTAAGATTA TTTTCGCCTAT  
AAA AACCCGATTGACTCTCAAGAT TTTG TATTCT TAAA AAATAGTTATGCAGCACACAGTAGATATCCAA

GCTATCGAATCTAAAATTTAATTTTACTTTTCATCCAGACTTCTTATTACAGCTCTGACACATCCTT  
CTTATAGAAATGAAATTTTCCTTCTGCTGAAGAAGATAGCGAACGCTTGGAAATTTCTCGGAGATGCAGTTT  
AGGATTAGTAGTTACGGAACATCTTTTCCTTCTTTTCCTTGCCTTAATGAGGGGCTCTTATCAACAACG  
CGAGCAGCTCTAGTAAATGCAGAAGCTTGTTCGAATACACAATAAATTATCTCTAGGAGAGCATCTCT  
TGATTGGTTCGCGGAGAAAAAATGCAAAATCATCGAGGAAAAATCTCTGCATACGTAATCTGTTTGAAGC  
TATTTTAGGTGCTGTTTACTTAGATGGCGCCTATCTCCTGCTAGAATAATCATAGTCCCTCTTCTACCT  
GATAAAAGAGTCTATTCTTCTCTCATGCTCGTGAATCCAAAAATCGTTACAACAATTCACACAAATAA  
CACAAAAGTGCTTCCCTCTTAAAAGCGTTGCCTTGGAAATCTGAAGACGGCTCTCCTGGTTATCATGT  
ACAAGTCTTTGTTAATGGGGATCTTTGGGGGAGAAGGCTTTGCAGGATCAAAAAAGAAGCAAAAAACTT  
GCTGCAAAACAGGCGTTATCAACACATGACAAAATAAATACACAGTGGACGTGTACAGAATGTGGC  
ACACATTTCTCAAAAATGGTTGGGACAATGTTCTGGATGTCTCCAGTGGAAATACACTAGTCGAAAGAA  
CAGCTCTAAAATAACACATCTTCTTACTCCTCTAGCTCTTCTATTTCCATAACCATAAAACAATGTGGA  
ATTTTCAGGAAGAAATACGAATTCATACCCAAGCTCAAGGCTGGAATCGCCTTCTAGGAGGAGGAACGGTC  
CGAGGTAGCCTCGCTCTATTGGGAGGAGAGCCTGGCATAGGAAAGTCTACTTTACTACTTTCAAAATTTCT  
CACAATTCGCGGCAGCTGGTCAAAAAGTGTGTAGCTTTGGCGGAGAAGAATCCGTGTCCAAAATTTCTATT  
ACGAGCCCAACGCTGCAAAATCTCTAGCAACAATATTTTCCTATTCCAGAAAATACTTTGAAGACATC  
AAAACAACAGATTGATAACATTGCTCCAGACATATTAGTTATCGACTCTATCCAGATCATTTTTCCTCCAT  
CCTTAAGCTCTGCTCCAGGATCGGTTGCTCAAGTGAAGAAAACGACCGCAGAGCTCATGCATATAGCAAA  
ACAAAACAGATCACAACTTTTATTATTGGACATGTCATAAAATCTGGAGAAAATCGCTGGCCACGTATC  
CTAGAACACTTAGTAGACACTGTTCTCTATTTTGAAAGTAATGTGCATGCTAATTACCGTATGATTTCGCT  
CTGTTAAGAATCGTTTCGGCCCAACCAATGAATTATTAATTTTATCCATGCATACAGATGGATTACGCGA  
AGTAGAAAATCCGTCAGGTCTCTTTCTACAAGAAAATAATGTAGAAAATACAGGCTCTACCATTATCCCT  
ATTGTAGAAGGCTCTGAAACTCTTCTGTAGAAGTTCAGGCTCTCGTTTCTTCATCCCATTTTCTAATC  
CTGTACGAAAAACATCCGGATTTGATCCAAAACCGATTTTCTTTACTCTTAGCTGTTTTAGAAAAAAGAGC  
GAATATTAATATATACATCCGATGTCTTCTTTCTATCGCTGGAGGCTTGAATCACACAACCTTCG  
GCAGACTTAGGAGCGGTGTTATCGGTGGTGTCTTCCCTATATAACCGCTATTTTACCATAAAATATACCT  
ATACTGGAGAGATCGGCCTAGGAGGAGAAATTCGTCACGTTTACACATGGAACACCGCATAAAAAGAAAG  
CATTATTATGGGGTTTAAAGGTATCGTGATGCCTTTTGGGCAGATAAAAGGCTTACCATAAGAAATTTCTG  
GATCAAAATGATATTATTGGAGTAAAACAATTAAGATGCTGTCCGCTTACTACAATGACCCATTTTT  
GCTGATTTTGTTTAGGGAACATTTCTTTACGTTTGGCATCTAGACAATCTTCTCTGGCAGTTCTGCAAG  
CTCACGAATGCCTGAGAAAACTACAGATATTTTTCCTCGATTATGGGGACAGATTATCACCACAACAAC  
ACAGGTGATCTTGATCAAGAGACACCTCTGTGTGCTGTAAGAAATACAGGTTTTTTTACAGATGATGTC  
GATTTCTTGGTGAATCTGGGCAATGTGATCTTGGTATACATTCGCTAAGGACCTTCCAGAAAATCCGA  
AGGCAACGGTGTCTCCATTACAGCCAGTATAGATCCTCGAGATATCCTCGTATTTTCATGAAAAATACCT  
TTTCGATCCCGTTACCTCGCCGTTTACGCATAGGGAGCTCCTCCGTGAGACGAAAAGAGCTTCTCTCTG  
CTCTATCCCTCTGCCATTATTACCGATATTTCAGGGACTATCCAGACTCGCTTAAAGCTGTTAGAAGAGA  
AAAATTTTGATGCCATAGTCATGGCTAATGCTGCGGTGTCTCGACTAGGACTACGTCTTCTTGCACAAA  
AATCCTCCCCCACCCTATCATCTTCAAGGACGTCTAGCCATCACTGCTAGCCGACATATACGGAGC  
TGGAGAGGTTTATTCTTAACTTGCGGCATCACAGAAGATGTAAGAAATATGTGTTTTCCTTAAATAAAGA  
TTGTTAATTAATAATAACACCTCTAATTGAAGCTTTAGGGTTAGTGAAAAATCTTTTAAAGGTTTT  
TTATTCCATGTAATAATTGTAATGATATCCGCCCTAACGATTGATGGGCGACTGCTGAGAGACCTAGAGTG  
ACCTACAGTCAAGATCTGAATACTACGTTCTCTTTAGCTTCACTGATAACGCTCTTCCCAATGTTTTAAAT  
AACTCCTCTCGTATCGGCAACGCAACTCGTTGAATAGTGAGGTGCACTCCGGAAGAATCTTAAATAATCTT  
GGTCCACTTGTCTTGTAAAAGACGGTAAAAGACCTTGAAGTAAAGTTTTCTTAAACCCCTTGGGGAACCA  
GTCAGTAATATGTACTGGCCCATATTTTGGAGATATGTGTTATGTCCTCAAATTTTCATCACCGGAAAT  
ATTCAACACCCTCTCCCAACAACCTGCCGCCCAATCCCCCATAAAACTGGTGGCCACAGTAACTTAT  
TGTTTGTTTGGCTCTGCTGCCTGTCATAGGATTAGGTGTCGCAATTTACTTATGCGCTAGACGCGCAAA  
TTATTGGAAGGGTAACGCAGCAATCGCAACTGCCGGTGGATTAGGTCTTATAACCATGCCGCTGCTTTG  
ATGGTTGTTATCACCCCTATAATCTTTTGTTTACGATACTTATATCAGCTTCTCTGCCAATTACCAGCTC  
ACTGCTGTGGAAGCTCTCATAAAATCGAAATCTAAGCATAAAGCCCTTTTCCTTATGAGGAAAAGGCTT  
TTTATTTCTTTATTTTTTTAATCAAAAATAATGTTCTCCATAGAAAAGATAAGCTTGTGATATTTTTCGT  
ATCGTCTTGGAGACTCATTTAAAACAACGAAGAAAGAAAGTAACTTTGAAAACAGCGTCATTTTCCTTCCCA  
CCAGACAAGATTATCTAAATAATCAAAATATATCACCGTCCACACATTTTCCTCGATTAAGGCTGACTTACCG



TATTTATACCGCAACGAGAAAATGCGCTTTAACAGCAACACGATCCCCAGTCAAAGCTAAGTAGCATC  
CCCAAAGAATAAAATGCTTCCGAATACTCTGCCAGTCTTTCGTCTAGAGGGAATCTATCATTTAATAGCTT  
ATAAGCTCGCTCTAGATCTCTATTCCAATAATGGGTCTGTATTATAAAAACGAGAATATGATCGCGCTCC  
TCTTACTGGCTGGGTCATAGATAGCTTGTAAAAGATCTATGAAAGACTCGATCTCTTCATC AAAAAG  
CCTGTATGTGGAATATATC AAAAGCATACAACTG CAAAGTAAATGGAGTCTTCCA TAAAGCTTCTTAGC  
TTTTTGATAATCCTTGTTCGG CAAAGCCTCCACCCCTTAA CAAAGAACATTAATTCGGCTACCTTTTGA  
TTGTGTAAAGACTCAGGGAATGTGATTTTCATCGGATACGTTTCGCTAAAGCTGTAGAGAATTGCA TAAATG  
CTTCCCTGTTCCCTGAAACTCCTGCAACATAAAAATAATCTGCAAGCGCTTGATAATCCC GCAATTC  
TGCTCTACGAAATAGTTCGGGAAGGAATAAGGAAAATCCTGTCCAAAACCTAAGGAAAAGCTCCATCTTA  
GAAGATC TAAACTG CAAAGGAGCCTTATCTACCTGACAGAACAAGGTAGCTTGTGCTTATGATAAATA  
TCCTAAGGAAACGCTTCTCCTCTCTAACACTAATCTTTTCTGGAGCGATCCA CAAATTAACAACATGAA  
TACTAGCGCTTCGCTGCGATGCTTGTGTAAACTATCATAACAAGCGGAAG CAAAGATGATCTTCTAATCGC  
GGAATCTCGGGGTGCTGTGAATATCTTTTAAAG CAAACAACAAACATCGTATCTCTTCTACAAAACCTTC  
CGTTCCCTCTGGTAAACTAACGC TTTGCCAAGATATTTCCAATGGGGCGCCAGCACCTCCATGAAGATAATC  
AAAAGAACTAAGAGCTTGCGTCAGATCTCCGCCCTGCTCCTCAA TTTGAGTTAATAAGGTCACTCCCAGA  
CGAAACTGCGCTTCATAAC TTTCTTTCTACCCG GAAAAGAATCTCGAATTTTACGATAAAAGATTGCAG  
CTTGATCATAACAGCTTTTCAGATAAGAACGCGTCAGGAACAGTAAAACAGCTGACTCG CAAAGCTCCTAT  
ACTTTTCGAAAATCGCAATATTGCTCATTCCCTTGTAAA TCTTGAATAATGACGCCTAGACGATTACCTAAG  
CTAGGAAGGTAGTCTATATGTAAAA TAAATAAAGCTTGTCTCAA CAAAGACTGCGATTCTGTTGTCTGATT  
TTTCTAT CAAAATAG CAAACAGATATTGCTGAGAAA TCATCTCTTGGGATTT TTTCTGAATCTCTATTCC  
ATTTTTGATAAGAGAGACCGTAAGTTCATGATTCTGACAGAAA ACCATAGTCCGTAACCACAG TAAAC  
TCTCCTCTTTTCAGCCTCCTTAGAAGGTAGGAAAAGAATCCCCATTCCTTCATGAACCTGCACCTTTTGTAA  
CGGTATACTCCACACGCGTAGAAGCACTTATTTTCACCTCGGAGAGCA TAAAATTATACCATTGAGCAGG  
GGAACCTGCTAGTACAGG GAAATAGCGTGAGAGTAGGATAGGGTCATAATATTTTCAACACGATTTTCTCC  
TTAGCCAT CAAAGTAGCTTTTACTGTCCACTCTGATCACCTGAAGATATGGCTG CAAAGCTTGGCGTA  
ACTCCTGAATAGAA GAAAACCTATCCGCAGGATTAATGGCGATTGCTTTTCATAGCAATTTGAGATAAAGA  
AGGCGGATTTTCCCTATAGGGTGACATCTCGATAGGAGG CAAAACAACATCTCTATAAGACAGCTTACGA  
CCTTTT TTTCTTCGATAAGG GAAAAGC TAAAGTCAACATCTGATAAA GAATGAGCCCTAGTGCATATATAT  
CCGTTT TTTCCGATGCTTCTACTCCCAACAAGCTTTTCGGGAGCCATATAATCTGGAGTCCCTACAATCTT  
GCCTGGAATGGTCATGCTGGAATAGCAGATATTTTCTCTCGTCGAAT GAAACAGCAGCTTCATCATCTGT  
TCTAGCTTTAACTCTTTTGGCATGTTTAAAGATAGCTGCTCCCCAATCAACGATAACAACCTCCC CAAACA  
AACCCAGTAAGATATTATCCGGCTTTTAAATCCCGATGCAACACTCC TTTAGAATGAATGTATTCCACCGT  
GGCA CAAATTTTAT CAAAATAGGAAGAAAAGATTTAACAGAGGTTT TTTCTTCTAGTTCTTTAGAAA GA  
ACTTCTTTCTGC CAAACACTCTTTTAATAAACTTTT TAGAGAAA ACCCTTCTATATAAGGCATTGTGTAAT  
ATACAGCCTCACCATCGCTGCATATCGAATATACAGGAACAATACCTGGATGTATGAGGTCTGCAGCAAT  
TTTTGCCTCTCG CAAAAGCGT TTTCTAAGCAGCGCATTTCCACTCAGATCCTCTCGGATCCTCTCAGA  
GCCACTCGACGAGAACACGCTTTGTTCATGGGC TAAATAGACTTCGCCATGCCTCC TTTGCCTATCAGCC  
TAATCAATTCGTATCGTTG CAAAAGAACAGCCTCTTTTAAAGCGATGCGAG TTTATCTAAAATGC TTTGC  
AACTCTCTCTGACTATTCCTTAACGAGTCTTT TTTAGCTTGTACTAAA ACTAGGATTTGGCGGAGTACGAA  
AATCTTCTACTAGCCAATAG TTTAGACACACTATCTATACTCTTTTC TAGGCGAGT TTTCTCTTTTCTAA  
ACGTACACGCTC TTTAGCAAGATGTT CAGGAGGAAGAATCACTCCAACCTGAATTCCTTCTACAACCCCT  
AAACTAAAATAACTGTCC TTTGGAGCTTCTGCAAGCTGCTCTACAGTT TTTACTCCTCC CAAAGCACACA  
TGATTGGAATACAGACATCCACCAGTCCCTTTTTC TCAGAGCTAATCA CAAAAGCTTG TAAAGGCTCTCT  
AGGATCTAATTGCA TTTACCCGGAATATTGCGAATCGTATAAAA CTAGCCTTTCTGCTATGC CAAATGAT  
TCTCGTAATCCTTGTG GAAAAGCTACATGAATAGG TTTAGGATATTTCCGCTACCATAACAAGCTTCAGAAC  
GCAACATGCTGACTGCATGCCCTGTTACAGAATCCCCCTTCCCATCTCAACAGTTCC TAAAGTTGCCTT  
GAGTT TTTGGAAAAGAG TTTCCGTAATATAAGGAACAATTGGATGTAATACTCC CAAAATATTGATCAAT  
AAGGTAGT TAAAGCTTACGCTTAGTTGCTCGCTGTTGATCGCTACCCTGTTTCC CAAATAAAGTAGGTT  
TAATGATTTCTAGATAAGTAGAAC CAAATCATT TTTAAAGAAAGTCATAAGC CAAAGAAAGCTATCTTATC  
AAAAGAGTAACAGTTATAGTGCCCATCTATAAGATCCAGCAACTCAT TAAATCTATCTAAGATA TAAAAA  
TCTTCCAATCCAAGAAGATCTTGGTTGACCCCTTCTTC CAAATCACGACTTGTTAACTCT GAAAATATGCC  
CGAAAATAAACCGAGCTCCATTCCATAACTTATTGATAAAGTTCTTATACTCTTCGAATAAGCGGTAGTC  
GAGATCAATTTGCTCACCCCTATTTTGCACAAGAACA CAAAGTAAGCCGAACCGCATCAGCTCCATATGCT

TCTATCATCTCAATAGGATCGATAACATTGCCTTTGGAATTCGAAAGTTTTC CCATTTAGCAACTACGT  
TCTTAGGAAGAGCTTTCCTTTATCATAATCACGTTTC CGTTCTCCA GAAACA TAAA ACCACTCCCCTTT  
TTCATCATATTCGCGATAAGACTTACC GAAAATCAACCCATGTAAA AAGACATCA GAAAATGGTTCAGTA  
TCGACCATTGCAGAGCACATCAATACCATTGCGGTAACCCAGAAA AAGAGAATATCATGTCTCTGTCAC TA  
AAACAGCTGTAGGATAAA ACTTCTTCAAATC CAAA CTGTCTTCATCAGGCCAAC CAAAACAAGTTAACGG  
CCATAACCCGGAA GAAA ACCATGTATCTAAA ACATCTGGATCTTGATACCAAGATTTCTGGATCCCGCATT  
ACCTCTTCTGGACCCCTTCTCCATCAAAGCAA FTACATTCTCATCGTGT TTA TTATGCCAGACAGGAA  
TACGATGCCCCAC CAAA GCTGTCTACTAATACCCAATCTTTA GATTATTTA CCAAGTAAGGTAATT  
CCGTACGAACTCTGGAG GAAA GATACGAA TTTCTTACTATTTACAAA TTCCCG CAAA GAGTCTC TAAAA  
GAATCAACAGAGA CAAA CCACTGT TTTGAGAGATAAGGTTCAATGATCGCCCCGTAACGATAG GAAA CTC  
CTACACGAGATGAATACGCTTCCCTTTTAAACGAA TAAA CCGAGAGCTTC CAAA GATGTGATAATAT TTTT  
TCGAGCTACTTCCCTAGA TAAA CCTGT GAAA ATACCTCCATTCTCATTAATCTCTCCGGTAGAAGTCAAG  
ATATTGATCATGGGGAGTTGATGGTTCATTCCCTGTCTTGTAATCATCCTTATCATGAGCTGGAGTGATTT  
TAACAGCTCCTGTTCCAAAAGATGCGTCTACG GAAA AATCTCCAATAATAGGGA TTTCTCGATTTACAAA  
AGGCACAACGACTTTTG GCCCCTAT TAAA TGACTGTATCGCTGATCCTCAGGA GAAA CAGCAATCGCAGTA  
TCCCCCAG CAAA GTCTCTGGTCTGTGTGTAGCAACAGTAATGAATTCCCTCTGAATTCACAACCTTGATAGC  
GAATGTAG TAAA GCCACCCGCTCTCTCCTCGTACTCTACCTCATCATCCGCCAAGGCTGTTTG CAAAAT  
AGGGTCCCAGTTGACTAAA TAATACCCTCTGTAAA TGACCCCTTATCGAA TAAA AT TTTAAAAGCCTTC  
TTCCTGACCGTTGGCGCCAGGATCCATAG TAAA CCGCTGACGAGACCAGTCACAAGAACAGCCAAGCT  
GTCGCAGCTGAGAAA GAATGACGT TTTGACTTTT TTTCTTCCAATCC CAAA CATGCTTCAAGAATCTTC  
TCTA GAAA AATCTGTTCGTGCTTACCAAGAGAAGCTTTTAGATGTC TTTT CACAACGT TTTG CGTGGA  
ATCCAGCATGATCGGTTCCAGGAACCCAA CAAA CCT CAAA TCCCTGCATACGCTTGTAACGAATGAGCG  
TGCTTGCAATGTA TTTACAAGAGCATGACCCATATGTAGGATCCCTGTAACG TTTG GTGGAGGCATCAC  
TATAGAATATGCAGG TTTCTCACTACTTGCAATTCGCTACAAA CATACCAGAGCGTTCC CAAAACGAATAC  
ACCCAG TTTT CAGAGCT TTTA GGGTCATACGCTTTA G GAAA TTGATCTTCGTTTCATGCCTTACTTCCATA  
TGTTGTGACTATTCTCGCATCTCTAATTAACCGATTGAGCTATGAGTACGAGGTGAC TTTAACGGAGAAC  
ATATTGCC TTTA GAGCTTGATTATGATCAAGCAAGAGGTGCCCTAAGACAACCTGAC TAAAAGCT TTTAAT  
GAAA TTACTTCCATCCATAAGTGATGGCTCCGACT TAAA ATTTCTTTA ACCATCT TTTGTCAAAGAACTT  
TATAAGAAAATGATACCTTGCCGATCTTGGAATCGTTCTCTTTGAGGGTATATACCTGATAGCCT GAAAG  
ATGTTGCACATCATAA GAAA ATTTG GCAGCCTCTCCATTACCGTAATATACCATAACGTGAAGAACCATA  
GGGAGAGAATCTCTAAA ACGTGAAGGCAGCCCCAAGTGACAACCTAGCTGCTGCCCTACAGACTCCGTAA  
CACATCCCCGATCTATACCTAGATGAGCTGCAGCTGTATAGTCAATTATCTATAAAA CTC TAAAACGAAGA  
TAATGCAGGCTGCGAGCATCCTCC TAAA CACAGAGCAGAGAACCGCTGCCACCCTAGAAATAACAA  
TAGCG CAAAAC GAAA G CAAA TAACG CAAAAGACTCAACAATCCAATCGAAG CAAA TGATTTA CCATAT  
ATTGCAGAGGAACGCGCATAGGCTTGAATAGCACTCACACAGCACTTCCCTTGCA TAAAAGCAGAAA GCA  
ATAACGCAGATCCTACAGCTATAACCATTACGATACCACTGACTGCAGAGACT TTTT CATCCTTAATTGC  
ATCATTCAGCAGTAACAT GAAA ATCAATCCG TAAA TGGAATGTGACGAGGGCATAGCAGACAGACCAATA  
ATCTTCCCGTGTCTTCATCGATTCGAGACATCACTGCGTGAGAAGCGACTCCAGCCATTCCACATCCAA  
CAGCGTACCAATCATTCG CAAA GCCATAGCCAATACAGGCCCACTACTGATACATCTATCATATA TTT  
CCTCTCACTAGACA TTTT CTATTTT TTTCAAAAACGCA CAAA AACCTTCTGTA TTTAAAGAT TTTG CGA  
CTTTTGATAAAA TTACTTT TTTCAATGGATG CAAA AAC TTTT CACCACCATCGAAGCTATAGTGATACCAC  
TCTAT GAAA ATTAAGGCG TAAA CCAATGGATCACACCTCCATAATG GAAA GCGCAATA TTTA CCGTGTGCC  
CGAAGATAATAATTAGAATTCCTACTGCGGG GAAA ATC TTTT ACTCATAACCATCACAGTATTTCCAAC  
CATCGTCCAGC TAAA CTCAGAGCGTACAACCG CAAA TAGGAT TAAA ACGTCT GAAA AACTTTGGATAACA  
GCCGTTATCTCATCTAGTCTCTTAATCCCC TTTG GATTACCCACC TAAA ATGGCAACCCCTAAGCCAA  
TAAA CGTTACATAATACCCTACCAACCCTCCTAATTCATAAGGAATATGTAGAGCATAATGAAT TAAA GA  
TACGGCTTG CAAA TAGATAGGCAGATACATATATGCTCCGCACA TAAA GATTACCCATCCTATAGAAGAA  
TACCGCTGTCTACAATAGCGTAGCATTTCCAATGACAGATGTACTACCCCACTAG CAAAGCTA TTTT CA  
T TAAA ATATTATCTA TAAA CTTATCG TAAA CAACGGC TTTA TATACTGAGTCCCCGCTACTAGTACT TTTG  
GGCTAGAA GAAA CTC TTTA GAGGAT TTTT TTCTCT TTTA AGAATAGGATAATCATGCACCAATTCCTTATAA  
CCCTTAGGACGCTCCTTACAGATAAATACTCCGCTTTT TT CAAA GCCA GAAA ATGTGTTAGTGAATACTCCC  
GGAAA GGGCTGGTGTAACTCACA GAAA CGC CAAA AAAGGATGTTGTAGCTCCTCCCCAACACACATCC  
AAGCCCTAATATCA TAAA CATCTGCAGAAA GCGT TTTA ATGCTATAGAGCGCTTAATCTGTTT CCGAGCT

TTAAA TGATAAAA AATAATGATGTTGC TAAAAAACTAATCCATATCCTGCGTCATTAATAATCATCGAGA  
AAAAAACGAAAAAGGAGAAAAAGACCATAATGAAGGGTCTTTA TCCGTTGATGCAGGAGTATCA TAAAT  
ATTAAC CAAA GACTCCCCTAATGCTCCCAGACCATGATTCTCTAAA TATGTAGGAATCACCTCATCTGGA  
TCAGGCTGCACCCGTTCTAGATAAAA TGCC TAAA CTATCA CAAA GTTTC TTCACTTCATC TAAA CGATCTA  
CAATCACCCAGCC TAAA GCGC TAAA AACCTTATCAT CAAA CAGATCTTCTGCACTAGCTTCTGCATGCTG  
TAAA CTTTG TTCATTGCATTGTTCCACA TAAA GCCTC TAAA AGATCCTCTCGATAAGCATATAACTCA CAA  
ACTCGAGCCTTCTT TTTACGTAAA AGAGCTTGAAGATGCCCTGCCCTCCTCTCTTAATTCATTGACAGAAC  
GCGGCGCCTCTATCTCAG TAAA GATATCCTTAGACAGA GAAA CTATCCCAATCACAGCATAGTAATCATA  
GTTGTACGCTGTTGCTAAGTAGAAA ACATTCTCTTCTTCGACTTC TAAA GGAGCTCCTTCTATATGTCTC  
TTA TAAA AAAATCGAACTGCTAAA CCTGTT TTTA ACGTCAACTCTCGGATTTTC TTCGGATGAAA AATCTC  
CAAGAGGCTTAACTCGAACTATTTCTTTA CCTAGAGCT TTTAAA GACTCTGTAAGAGTTGTAATCTCCTG  
ATTAAGAT CAAA GATCTCTTGAAGCAACTGCTCTGTTACC AAA TAGCCTGACTTCGTTGATAC TAAATCT  
GCTGGGGAACAGCTCTTAGTTAGCAGATTTAAA ACC TTTAATCCCTCAGAAA GC TTTTCGTACTTTTTC TG  
AATC TTTGAGTTTA CTT TTTGATAAAA AATTCGACAGCCCCAATCTCTCGACATGCAGAGAAA AATTCAGA  
CTTCTTACGTCCAA TAAA TAGATATTTA TCCACATCTACGCGCATGCAGACTACTCCTTATGCTGCTGAA  
TTTT TTTCTTAGCCAT TTTCA TTTGTCCCACATCAGTAATACTTCTATCACTTAA GAAA ATGGCTATCTT  
TTTAAGAGTTTG CGAAGTTGTAGGTATGAGTTT TTTCTCGAAA AG TTTACTCGAATAGAGACTCTCCGA  
AGTTCTTCTTC TAAA AGCAGCAGTCGTTCTTGAGCATTCTCAGCA TAAATCTTACTCACAAATATTTCT T  
TTA CAGATGCAAGAAGAGAGTCTAAC CAAA TAGGTGTATCCAATAACGAATACTCTGGAGAAGTAAGTAC  
AACCCGC TTTA GTAAGGGGACTTCAACGCCTGCGATATTCTCGACATCCTTTTC AAGGATATCGACAGAA  
AAACACTGCTCTACTGCATCCGTATAGAGAGGAATGCT GAAA AGCTCGG CAAA GCGGTACATTCTATCTC  
GAGCTTGTTCATTAGTCGCTGTAC TTTCTGCAGC TAAA CCGATTGCAGATTGAACCTCGGCCTGTAACAA  
AGCT TTTCTTTAAT TTTAATGTGGGCAAGTACATGCCAACATATTAAGCT TTTGT TTTCTCAGCTCTATAT  
GAATT TTTCTGTTAAC TTTATTTGTGAAGACATGC TTTAGGCCAATA TTTCTGAATTAACTGCTCT TTTAAT  
TCCGACTTCTTCAGAAT GAAA AC TTTGAGATAAAA AT TTTTCATCCTATATC CAAA GCTTCTTCAAGAGGA  
ATATTCACTTCTAAA CTCATTAAGCGAGCCT CAAA TAATTCAGAAA ACGCTAATAACTTT TTTATCCCAAT  
TAGAGAG TTTGAAA CCGATAGACATCCGCTCTGCAGAC TTTCTAGAGTCTGCG TAAAGACGAAT CAAAGC  
ATTTGCTAAGTCACCATGATCCTCTCGAGTCTTCTTACCAATAACCAACTGCTTCAGTCGAGATAATGAG  
CCAAAAGGATCTATTGATTGCT TTTCAAGTAGAACTGTCTTCTGTAATAAA ACCGTATTGTCAGGAA  
CTGGATGTGTGATATCATCCCAGGCATCGTAGTCACACTGAT CAAA GTAATTGATCCGCCTTGAGCAAT  
ATCTACAGCTTTTTCATAACGAACAGCGAGATCGGAATA TAAA GACCCTGGATATCCCCTATTTTGCTGGA  
ATCTGGTCCATTGTAATAGCAATCTCT TTTCAATGCATCAG CAAA AGCTGTCATATCAGTAAGCAGAACCA  
GGACATTTTTC TGCTGTTCCAATG CAAA AC GCTCTGCACAAGCTAAA GCCATATCTGGTATCAATACACA  
TTCAACCGGAGCATCTACGGC TTTATGGATGAACTTAACACATTTA TCAGC GAAA CCTAACCGCTGAGAT  
TCCTCGACGAA GAAA TTGTAATCAA CAAA TGTTAATCCCATCCCTCCAATAATTACGATATCTGCATCTG  
TTTGAGCAGCAATACGCATCAACAGCGCATTATGAT TTTCTCCAGAAGAGGA GAAA ATCGGAATTT TTTG  
AGATTTGACCAAGCAGTTGAACATATCAATCATCGGTATGTTCTGTTCTGACCATCTCTCGAGGCACAATG  
CGA CAAA CAGGAT TAAA TGAAGGTGTTGTAATAGGTATAGGCTCAC CAAA AC ACTCATCTTCATGATCAA  
TAGGT TTTCTCTGTCCAT TAAA AC GTCGACCTAA CAAA GAGTCTCCA TAAA TGACCTCCATGGGTCTTCC  
TAA GAAA ATCAC TTTG TCTCCTGTAGACAATCCAGAAGTACCACCGAACACTTGAAGAGTCACT TTTCTC  
GCATC GAAA CCG CAAA ACAGAAGCATACGATGAGCGCCCATCAGCTC TTTCAATCTGCACTAATTCACCTA  
AAGAGGGCGCCTTCTGCCTCCACAGTAATCAAGTCCCCTTGATATCCGTAATTT TTTG TATATATCG TTTG  
CATACTACGCCGCTGCACCAT TTTGCTTTCTAACAG TTTATAGATTACTTCCAGGCC TTTCTGATATT  
CTTCAGATAGGAA TTTCTGACCATTCAGCGTCTTAAT TTTACTTTTG GAGCTCTAAA AAGAAA CTGCGGGC  
GTTATCTGGACAATC GAAA CAGAATCTAGAGT TAAA GATGTGATTCAT CAAA GAAA AGAGCTCTATCTGC  
CGAT CAAA TGGACAGTAGCAGTCTCAGCAT CAAA TCGGTTTTG CTG CAAA TAACAGAAA TCGTATAGCT  
CTGAT TTTCAAAA AGA TTTCCATGTCTTCCATAGAAA TCCCTTCTTCCCCTACGACTTCTATTCG TTTACC  
AATTTCCAGCACCTTCTCCAAGAAGCGGGAGGCTTG TTTAACAGATTCTCCCCAACCCGGAACCTTT TTTTC  
TC TAAA ATTTCTGCTACAGAATCCAGATA TTTAGACCAT GAAA TCATTGGGTCAATAGAAGGATATCTTC  
TTGCATCTGCACGCGC TTTTCGAAA GACCACAGAAA GCTCCAACCACAGA TAAA GTTGTGTTGTAAACAGG  
CTCTTC GAAATTTCCCTCCTGCAGGC GAAA CTGCTCCACAGATAGT CAAA GATCCTTCCGACCCATCCTTC  
ATT TTTA CAGCCCCACCTC TTTCTATAGAAA GCGGCTATTTCGAGACGC TAAA TAGGCTGG GAAA GCCTCTT  
CCCAGGAATTTTC TTCTAATCGCCCA GAAATCTCTCT TAAA GCCTGTGCCCATCTAGATGTGCAATCAGC

CAGTAA CAAAATGTGCAGACCCATCTGACGGTAATACTCAGCAATTGTAATCCC CAAATAAA TAGAAGAT  
TCTCGAGCAGCTACAGGCATGGAAGATGTATTA CAAA TAATACAAGTTCTGTGCAT CAAAGACTGCCCTG  
TATGAGGGTCTTTGAGATGAGGGAACCTCTGTAAGATTTCTACAACCTCCCCGCACGCTCTCCACAAGC  
ACA CAAA ACTACAATGTCTACAGCAGCATA TTTG GATAAATGGTGTGCTGCAATACCGT TTTCCAGCTC  
AAAGGTCCAGGAGTACAGAACGTTCCCTCCCTAAGAACCGGAA TTTG TGTATCTAACACTCGCAACCCTA  
CATCCATGATCTCGTGAGAAGGAAC TTTCTCCCCCTTCAA AAAAGCTTGCTTGATAGGCCA TTTCTGAAC  
CATAGTGAACTCAAGCTCTTACCTGTTGAAGTACGTCCCTTAGCAACAACGGTATCGACAGTATAATTC  
CCAGAA GAAATCACCATGTGATGGTACTTCTCT CAAAACAAGA GAAAGGCACCATAATCTTGTGAT CAA  
AACGACCTTCTTTTACCGTTCCAAGTACATCTCCTCGA GAAA GTACAGATCCTACCGAAGCTT TTTGCGT  
ATAAGCCATACTG TTTCTCGA CAAA TGGCATTAACTGATTTCGCTCTTCT CAAA AATAGGCTTGTATCT  
GCCAATA TTTCCAAGCGATTCTGTAACCCAT CAAA AATTCCTGGAG TAAA CCGGGCCCTAATTCAGCTT  
CTAA TAAA TGTCCG GAAA AAGTTAC CAAAGCGCCACGAGAAA TTTCTTGAGTCTCCT CAAA AACTGGAT  
CTTAAC TTTTACCTTACGACTTCAATAA TTTCTGCTTTTCAACCAAGTATTGTCTACGCTAACATAGGCC  
ACTTCTCCCTGACGCACATGCCATCAACATGCACCCGCAATAAA TTTCCGTAAGCTTCTACGACATAGC  
CCTGCGTCG TTTGT TTTGAAGTTGCTACCATCTGATTCC TTTCTCCAT CAAA TTAATCAGTTC TTTCCC  
TTCTGAACACTCGCCCAACTACTACGAATGGCCAT TAAA ATGTAGTTACCCGAGAAA GAATTGCATCTG  
TGT TAAA GTATTTG TCTCGTGACATCTCTTCTACCTTAT GAAA TTCATAGAAA GAGAGAGTCTGATTCAA  
CATGTGTGGAAGACGCCGTAATCTCC TAAA ACATCTCTCAATTCGAAGAATTCATCAGGAAGCTCATAA  
TTAGGAGAATCTT TTTGCATCAACACATGCAAGACAATGGGATTCGAACATCTTTCATCCCTAAGGACAA  
AAGACACATCTTTCTGCATTACTCTAGCTC GAAA CCTGC CAAA ATAATTCGTAAA TCTTGCT TAAAGCG  
AAAATAGGTTCTAAGAAA TTCTGAAGGATAATCTTGATAGTGATCGAGAAAATCTCTAACTAACTCTGAG  
AAA TGCCT TAAA CGCTCTCGAGGAGT TTTATAGCGCAACAGAAAATCT TTTAAAAAGTCTTCAAAC TCCC  
ACTCATCCGACCACA TTTGAAGCCGCAACAAA GACTCCACATTACTA TTTGTAACGGTCC CAAA GAAAA  
GGGAATCGA TTTCCCTGCCAGAAA AAAG CAAAAT TTTCTAAA T CAAAAAACCGCGCAATATTACGTAG  
GACCGCAATCCTTATCTGTAAA G TTTAGCGCTAA TAAATCATTGAT TTTCTT GAAA TGAATAGAGAGGAG  
AAGATTCGGGTTGTTGAGGAGAAA GGAAGGAGGA TAAAAAATAACTGATTCATAACGCGCTCTTACAC  
CTTCAACTAAGAAA CTCTCTAGAAA GTCTCCAGAGATAGTCTTCT TTTCTCAACGCATACAAA AAAGC  
TCCGCGAACTCGGAGCTTCTATCGTCAACGAAT TTTCCCAATAACGAT TTTAAA CAACATAGCCCC TTAAG  
C CAAA GATCCTTTAGCAAGACT GAAA GATCATTTC CCGAAAATCT TTTCTGTAAA AATCTAGTCAA TAAAT  
CTAG CAAA ACCTCTGAGCTCATATC TAAA ACCCAATTTGCGCTCTTCAACTTTTAACTGAGCACCTCCAGA  
GAACTTGCCAACAGATAACCC TTTCTCTTTGAG TTTAGAAGTTATCTCT TTTCC TAAA GCCTCATTGACA  
GCTCGAGCTGACACATG TTTCCCTATATAGGCAGAAA GATTCCCA GAAATCCCCTGCGCATCAACTGCCT  
GTAC TAAA GCTTGCACGAGCTTAGCGCTGACTTCTGGATCTGTAGCCACATGATCTAACCATTCACC CAA  
AGACTCTCTGAAGATCTTCG TTTCTACTGCCTGCTTCAAGT TTTCTAAA GAACGC TTTCTGCCTGTACC  
AAA GCCGCTCTCCTTT TTTCTAGAG TTTGGTCAAGTGTCTCTTCCG CAGAACGAATAATCC TTTGCGCT  
CTTCTTGGCCTCCTCAACAATACGT TTTGCTTGTCTCTTGCATTATGAACAATAGAACCGGCTTCTC  
TTCAGCTGGT TTTAAA G TTTCTCTCTCG CAAAGCATCACATA TTTGCTTTAATTTA TCTTGAGCGCTGAGA  
TCTGCCATATCTGATACCAAGAAA AACAACG TTTATCT TAAAAAACGATCGATTATGATCCGGTTAACC  
CTTAAGATTAGATCATAACAACG TTTAAAAT CAAA CAC TAAA CCTTAT GAAA AGAGTTATCCTCTGCTCT  
CT TTTATTTGCAAG TTTCCCTATAG TTTCGAAGGCAGCCG CAGAAG GAAAGCCTCT TTTCTAGAGCTGCTC  
AATTACGAGAGAAA C GAAA AGATCTCCATGTATCAAG GAAA CCCTCTCCTCGTTATGC TTTGAAA AAACG  
TGC TTTAGAAGCTAAA AAAAAATAGGCCTTCTATTAGCTGGATAACCTATTCCAATGCTACCTATTC TTT  
CTTATCCCTAATACTTGGCAATGCATCGATGA TAAA ACGCAGCTACCG GAAA AATTAGATGTTCT TTTCA  
TTG GAAA GGGAGCAGGAGGACTGACGCCAACAATCAACAGCGCACAC GAAATCATCCA TAAA ACTGAAGA  
TGCCATATTGAGGAGAT TTTAGACTATCATCGCGCAATGAGAATACACTGGAATCTTCTATCT TTTGCG  
CACATTC AAGCTCCCAGTGG CAAA TTTACAATTAT CAAA ACG GAAA AAAACACCTCTTGGGGACGAGTCT  
TTTG CCTCCAAGGTGTGACAGTCA TTGATCACACAGCCTACATCCTTACAAGCACGTCTACCATAGATGA  
CTATCCCAACGTCTCCTTAGCTCTTC TAAA AGCAGCCTCCTCC TTTAAGCTCTCA GAAA AAGAAGAAGCT  
GCTCGTGGTGTATGCTAT TTTAGAAA AAGCTTTGAAA GATCTG CAAA ATG GAAA ATAGCGGAACGCTATCC  
TCTATGATACAAGACTTCTCCTCG CAAA GAATCGAATA TAAA TCTAACTCGCACAAAG TTTA CCCGCTAGA  
TT CAAA TT CAAA AAAACAGGGAATCGA GAAA ATAGCAGCT GAAA AGGAACGTCAATAC TTTGGCCTTGAA  
CAGAGACCGAGACCGCGGCTCACCGAGGAGGGCTTAGCTTCA TAAA TTCT CAAA CAAAGAGCAGAGAA  
TCGTCTAATAGCATCACACATCTCAGCAT CAAA CA TAAA TGAAGCTTCG CAGCAATCACACACAAGACAA

TTTCTAAATCAATTACAGAAAAGCTACGTTCCCATCACAACAATACGGACAAGAAAACATAACGCCT  
GTTCCTTTTTTCATGACATCCTTTTATTCAACACTGCCCCACATTATCAATAAAAACTATGCTTCC  
TGGGCTGCGATCTGTCTAAATAATTCGGTAACTGCAGACTCTAAAAATTTGAGTGTACCAGAAAAGATGC  
GAATACCTTCAGCTAGCTTCTCTGTTGCCATGGCATCTTCATTCATTAAGAACCAAAATACACTCTCTGA  
CAACTCCACAGGTTGAATATCTAATTTTTCGCTTCTTCCACGTAAGCTTTCTTTC AACAGGCTGCTGA  
TC TTTCTTGAGTCTTCTAATAAATTTAGGAGAAA CCGTAAAAAATCACATCCGGCTAAAAGCAAGCACTT  
GCTCTTTCGTCC TAAAAGAAGCCGCCATAATCTGAGTTGGAATATCAAATTTCTTATAGTAAGAATAGAT  
ATTTGCTACGGAAGCAACTCCAGGATCGGCTTCGATAGAATACCCCTTCTGCGCCATAAGCAGCGATCCAC  
CAATCA TAAATCCGACCAAAAAGGTGAGACCAATGTTACTTTAGCTTTTGCTGCTGCGATCGCTTGCA  
CAAGAT TAAAAAT TAAAGTACGTTACAAGCAATCCCTTGACTTTCTAAAACCTCTGCAGCACAGATACC  
TTCCAAGTCCAGGAATTTTAATAA CAAACGTTCTTATCTCCTCCCATTTCTCAAATAGTTGAGAC  
AAAAAATCGCTCGCTGAACCATTGCTTCTGTAT TAAAAGAAAGCCGGGCATCAA TTTCTAATGATACCC  
GACCAGGAACATGC TTTAGAATCTCCAAGCC TAAA TTAACCTGGATCTTATCTAAAACAAAAGTCAGAGT  
TTGAACATCATCACCATTCTGCCGGATGCCCCAA GAAATGGCTTCCGTCAGCATCGACTGGTACTTAGGC  
TCTTGAGCAACCTTCAAGAT CAAA GAAGGATTTGTCGTAGCATCTGAACCCCTAACGTCTTGAT TAAAG  
CGGGATCTCCAGTATCTCCAACAAGAACACTC CAAAGCT TAAACTGATCGAACTGGCTAGACA TAAACAC  
CTTGTC AATTTTGTACTCTAAGTGAAGCCTAC CAAAAA AACGATACTATTCAAGGGGGTTATGACTCAT  
ACCCCTCTCTTTCTCTAGTT TTTGGGCAGATC TTTAACCTGCCACAGACT CAAACTCGCTGT CAAAAT  
CAAA GACCAAGTCTTCTTGCTCTT TTTCAAGATGTTGCTTAATACGCTTGTGCGTAT CAAATCCTGTACC  
TCCAGGAATCATATGTCCCATGATCACATTCTC TTTGAATCCTAACAGATAGTCTGTCTTACTGCTGCAA  
GCAGGCTCTGTTAAGACCCGAGTCGTATCTTGGAACGAAGCAGCA GAAATAAAGGACTCAGTTCC CAAAG  
AAGC TTTAGTGATTTCCAACAGCACTGGAACAGCTTGGAGG TTTCCCTCCATCTTCTTCCGTGCGACG  
GTTCTCTTCATAGAACTC TTTCTTATCGACATCTTCTC CAAA CAATAACGTGATCACCTGGATCAGTA  
ATGCGAAC TTTCTGCAACATCTGACGAACAATAA TTTCTGATGTG TTTGTGTTAATGTCTACCCCTTGTA  
GGCGGTATACTTCTTGAACCTCATTAACTAAATA TTTCTGAAGCTCTCTAACACCA CAAATCGCAAGGAT  
CTCATGTGGAACAAC TAAACCATCCGTCAACTGCTGACC TTTGATTACGCTATCGCCTCGTTGTACGATT  
AAGTG TTTGGTTAGAGAAAT CAAATGTTTCTCTTCCATTCCCCTAATCTCATCTCGGACAACAAGAATAC  
GCTTGTCTTCTGAATGCC TTTGAAGTCAACAACCCCATCAATCTTAGCGATATCAGCAGCATCTTCAGG  
CTTACGAGCTTCTACTAACTCGGCAACCCCTGG CAAACCTCCAGTAATATCTTTTAGTCTTGATAGCCCT  
CGAGGCAATCTCGCTAAGAGCATCTTGGAGCGATACGTTGACCTTCTTCTACGGAGATAATTGCTCCAG  
AAGGAATAGCATACTACCGACCAACTC TTTCTATATTGGCATCAGCATATATAGCGATCTGAGGATGTAA  
TTCCCTCTGTGCTGT TTTACGATTAACTCAACAAGCCAGTATTCTTATTTCGCGACCTTCTCTGTGGAG  
ACTCCCTCTAC CAAATCTTTCGTAATGAACGAATCCTGGCTTATCACAGATAAATGGGATGTTATGAAGCT  
CTACCTCAGCAATCTCTGTCCCGCTGTAACAGCAGCACCATCATTAAC TAAAATCTTAGCTCCTAATTC  
CACAGGGAATGTTGCCAGACTTTCAATAGACTTCGTACTCAAGAG TTTCTTATATTCACCTAAGCTTCGT  
CCTTCGTCTTGAAC TAAGTGAAGAGCTCCCATCTTGTTAAGCACAAGATTATTACCTCTTGGTCTACGA  
CAACACGCAAGTCTAGG TAAACAAGAATCCCATCGCACTCAGCAACGATCTCTGGAGTTGAGGATGTGCG  
AGCAACCCCCCAAGGTGGAACGTCTCATTGTTAACTGAGTTCCAGGTTCCCCAATGGATTGAGCTGCG  
ATAATACCAACGGCTTCTCCTAATCCAAT CAAATGACC GTTAGCGAGATT CAAACCGTAGCATTTTAGCAC  
ATACTCCTCGACGACTTTTCACAAGTAAGAGTGAACGAATCTTACAC TTTCAATACCAGCGTCATCAAT  
AGCTTCAGCTTGAGCAGAAGTTAATACATCGCCAGCATATGCTAAGACGTTGCTCTTATCACCAGGCTGA  
TAAATGTT TTTTCGAAA CCGTACGTCCG TAAACACGATCT TTTAGAGGCAACAGTTCTTCAGAACCCTGAC  
GGATTGTCGACACCTCGATATGATTTAAAGTACCACAATCTCTCTCAGTAATAATGACATCCTGAGCGAC  
GTCTAC TAAACGACGAGT CAAATACCCGGAATCCGCTGT TTTAAGCGCGGTATCTGCCAATCCC TTTCTA  
GCTCCGTGAGAA GAAATAGAGTACTCTAGAACAGT TAAACCTTCTCGAAGTTTCAAGTAATCGGAGATT  
CAATAATGGCTCCG TTTGTTTAGCCATTAGTCCCCG TAAAGCACCTAACTGT TTTA ACTGAGAT TTTATT  
TCTCTGAGCTCCAGAATCAACCATCAAGAATAGCGGATTATG TTTGCTATTTTGT TTTCTTGATCTCA  
GAGTA CAAAGCATTAGACAAGAGGCTGAGACTTCAGT CAAATACTGATCGT TTTGGAATGCCGTTCCC  
CATCAGTAATAATTCGCTCCTCGTACTG TTTCTTAAACAATAGCAACCTTGTGTAAGCATCT TTTAAGAT  
TTCTTTCTTGAT TTTCAAGGAATCTTAACATCCTTCAGACCCATA GAAATCGCAGCTTTCTGATGTTGTA  
AAGCCTAATTC TTTAAGATCGTCTAGGAAGCGTACAGTAGCTTCTAACCAC TTTCTTATAGCACTGCA  
GAATCAATTCACTGATACGCTTACTTGGCATGCTATAGT TTTGGAAACCAAGTTC TTTAGGAACGATCGT  
ATT GAAA AATACACGACCAGGTGTTG TTTCAATAATCTGACCATCTATTGAACTTTAATTTCTCATGG

ATGTGAATCCCTCGTCCAGTTTCATCTCGACGAGAACCACAGATCTCATCCTTCAGAAATAAACCTCCAG  
CATTAGAGCTCGAAGCACTTCTACTTCGTC TTTAAATGCTTTTGTTTCCCTCCATGTTCTTCAGGGAA  
GTAGGTTGGATCAGCCATATAATAAGATACCCAATGTCATATCCTTAGAAGGAGTTGCAACAGGTTTC  
CCAGAAGATGGCAAATAATGTTGCTGGAGCCATCATCAAGACCTTAGCTTCTAACTGCGCCTCGATAG  
AGAGCGGCACGTGAACAGCCA TTTG GTCTCCATCAAAGTCCGGGTGAATGCTGCACATAACCAGAGGATG  
GACCCGAATAGCCTTCCCTTCAATCAATACTGGCTCAAAGCCTGTATTCCCTAATCGGTGCAAAGTAGGC  
GCTCGGTTTAGTAAA ACTGGATGCC TTTAATTA TTTCTTCAAGAACATCCCAA CTTCAGGAGCTCCCC  
GCTGAATCATCTTCTTCGCTGAACGAATAGTATAAA CACTACCCTGATC TTTCAATCGTTTGATAATAAA  
TGGCTCAAACAATTCAGCGCCA TTTCTTAGGCAAACCGCACTGAT TAAATTTCAATTCAGGGCCAACA  
ATAATCACTGAACGTCCGGAGTAATCCACTCGTTTACCTAACAA TTTTGTGCGGAAACGCCCGTTTTCC  
CTTTCAACATCTCTGA CAAAGACTTCAGAGGTCTATTGCCAGCTCCATAACAGGATGTCCGTGACGTCC  
ATTGTCAAACAGAGCGTCAACAGCTTCTGCAACATCCGCTTCTCATTTGCGGACAATGACCTCAGGAGTT  
TTTAGCCGTAATAATAGCTTTTAAGCGATTATTCCGGTTAATAACCTACGATACAGATCATTTAAGTCTG  
AAGTAGCAAACGCCACCATC TAAAGAAC TAAAGGACG TAAATCTGGGGGAACAACAGGGATGTTCTT  
CAATACCATCCATTCAGGACGGTTCGAAGAAGATA CAAACCTTCTACGATCTTCAGACGTTTAGCAAGC  
TTCATTCTCGCTTGCTGAGATTTCTGTT TTTCT TAAACGATC TTTAAGCTCTCC TAAAGGC TTTCCAAAT  
CTTCAGATTTGAGAAGATCATAAAA CAGCCTCTCCCTCCATTTTGGCAAC GAAAGCATC TTTACCCCATTT  
TTCAACAACCTTCTCGATA TTTTCGCATCATTGAGAAGTTGTTTC TTCACGAGATCAGTATTACCTGGATCG  
ATAACAACATATTCTTCGTAATAAA TTACACGCTCCAAGTCCGAAGCGGTCAATTC TAAAACATTTCCGA  
TTCTTGAAGGAGTTGT TTTGAAGAACCATATGTGAACAATAGGAACAGCTAACTCAATATGAGCCATTTCT  
TTCTCGTCCGACTTTTAGAAA GTGTGACCTCTACTCCACAGCGGTACATACAATTC TTTATGTTTGATC  
TTCTTATA TTTACCGCAATAACATTC CAGTCTTAGTAGGCC CAAAATCT TTTTCGCAGAAATAACCGC  
CTTT TTTTCAGGTTTAAATGTACGGTAGTTGATCGTCTCCGGTTTC TTAATTTCCGACAAAGACCCTTGT  
GCGAATAGTCACATCTGAAGCAATCCCAA TTTCTAAC TTTATCAAACAGCCCTTCT TTTACCAGGGCTGCA  
TCGTCTCGAGAACCTTCTCTGAACATTAAC TTTCTCTCCAACAAGTGT TTTAAGCATCTACTACCATAG  
GGCGAACATCAAGCCCTAGACCTTGCA TTTCTTTAAT CAAAACATTTGAACGACTCAGGCGTTCAGAACG  
AAGTAAGT TTTCTCC TTTAACGATCGATTCTGATAGATACGAGTTCTTCCC GAAACATCGTCGGACTTAACA  
GTTAGGATCTCTTGCAACATATGAGCTACCCATACGCTTCTAAGGCCATACCTCCA TTTCCCGAATC  
TCTGTCTCCCATCTGCGC TTTACCTCCAAGAGTTGCTGCGTAACGAGAGAGTAAGGTCTATAGAACG  
AGCGTGGATCTTATCAGCAATTAGGTGACTCAATTTCAACATGTAGATGTATCCAACGACCAC TTTGCTA  
TCGAAACGCTCTCCGGT TTTACCATCAAATAGATAAGACTTACCATCTTCAGGCAATCCCTGCTCTATCA  
TCATATCC CAAATACGGGACTCTG GAAACCTTCAAAGACCGGAGT TTTACATAGATACCTGCGGTTT  
TG CAGCATATCC TAAATGTGTCTC TAAACCTGTCCAAGGTTCAATTCGAGAAGCACCCCTAACGGGTT  
AAAATCATCTGTACTG TTTACCGTTAGCTAAGAAAGGCATGTCTGCTTCTGGAACAATCTTG GAAACCA  
CTCCCTTG TTTCCGTGACGTCCAGCCAT TTTATCCCCAACTTGAAGT TTTCCGCTTGAAGCCACG TAAAC  
TTTAAC TTTGTCGGATAACTCCATGATCTAAGTCAGCATCACCTTCT TTTATGTGCTCAGCTTCGGT TTTA  
TAATTGACTTC CAAACGCTGAACAGCTG TTTCATAGCTAGAAA GAATATC TTTCAAACATCATAATGT  
CACAAGGAGCAATCAG CAAATCAACTAGCGACTCTC TTTCTAAGAGTTTCGATAGTCTCTTGAT CAAAAT  
AGCACCTTCTTGAAC CAAATATCTGCCGAACGACGGTGTACAATCGCTGCAGGAGCTT TTTCAATTGAGC  
AATAGAGCCCCTAG TTTCTCTCTATGTTCTAC TTTCAATTGAGCCAAC TACTCTTATATTCT TTTCTGTA  
GATCCTTAAGATGCACAGCTTCTTCAACAGTTTCATCATCGCTCTTGGACAAGCGATCC TTTCTGCTGAA  
TAC TTTGACATCCATTACGACTCCTTCTGTACCAGGAGGAACCGTTAGAGAGGCATCT TTTACGTCCGCC  
GCCTTCTCTC CAAA AATAGCTCGCAA CAAACGCTCTTCAGGAGCTAGTTCCGTCTCAGATTTCCGGAGTGA  
TTTTACCGACAAGAATATCTCCCGCTTGACTTCAGCTCCAATACGGACGATAACCATCCTCTCCGAGATT  
TGC CAAACCTCTTCAGAAACGTTAGGAATATCTCTAGTAA TTTCTTCTTTACCGAGT TTTGTATCTCGA  
GCTGTTAACT CAAATCTCTATG TAAATAGAAGTGTACGCATCTTG TTTAATCAACCTCTCGGAGATGA  
TAATCGCATCTTCGAAGTTATACCCGTACCAAGGCATGAAGGCCACTAATACGTT TTTACCAAGAGCCAA  
TTCCCC TTTATCGGTTGCTGGGCCATCCGC TAAAACATCTCCATGCGTAACCACATCTCCACAGAACAC  
AAAGGAG TTTGGTTGATGCATGTTCCGGAGTTGGATCTTAAGAATTT TTTAAGCTGATAACGATCCTTAA  
GCGTTGGATTATTCTTCTTCGCTACGACAATCTCATAGCTATCTACGATTCGACTACCCCATCTTCCGT  
AGCCACAATAATAGCTCCAGAATC TTTGGCAGCACGTCCTTCTAATCCAGTTCCAACAATAGCAGCTTCC  
GT TTTCAATAATGGTACAGCCTGCCGTTGCATGTTGCATCCATAAGAGCTCGGTTAGCATCGTCTGTT  
CCAAGAAAGGAATCAGCCCCGTAACCACAGATACCAGCTGT TTTGGA CAAACGTTCCATATGCGTAACCGT

ACTTGTGTCGGCTTCAAAGCCTCTCCTTTGATCTAGCCAGCATAACAGGAGTTTAAACATATTATAC  
TCATCGAGCTCCGCAGAAGCCTGAGCAATGACACACTCTTCTTCAACATCTGCTGTCATATACTCAA  
CATCTGTACGATGCCATCGCGCAGACACGATAAGGAGTCTCTATGAATCAAATTCATTGATCTTAGC  
AAAGGAAGATAGTGAAGTAATCAACCCAATGTTTGTCTTTCAGGAGTCTCAATTGGAATAATCTACCA  
TAGTGGCTTGCCTGAACGTCTCGAACTCAAACCAGCTTTCTCTATTCAATCCCCAGGTCTAATG  
CTGACAGACGAGCTTGTGCGTCAATCTGCGACAGGGTTTGTCTGATCCAATACTGAGATAATTGAGA  
ACGGCTGAAATAATCTTTTCAGGACACTGACTAACCCTTTAGCAGAAATAATCTTTCTGGAGTTAGGGTA  
TCAGAAGAATAATCAAAGAGATTCATTTTCTCGAACGATCTTTCTCATTCTAGCCAATCCAGAACGAC  
AGTGATTTCTGAATTAGTTCTCCAACAGAGCGAACTCGTCCGGTTTTCGCAATGGTCAATATCATCGATAGA  
TGCTTTCTCATCGCCATTTCGCAACGAATCAAATAATTTCAACGCGCCGATAACATCTTCTTTCTCAA  
GTCACTTGAGATAATGTTTCTGCTCTAATGGGAAGCCTAATTTTATTTAATAATAACGTTCAACGC  
GGCTTAATAATAACGTTTAGCATCGAAGATAAATCGCATAATTGTGGATCGAGCATTAGCTAAAGTTGC  
AGGCTCTCCTGGTCTGAATCTGCGATAAATAATCTTTAAGAGCAGCTTCGTAAGAATCCGTAGGATCTTT  
GCGAGCATCTTAATAATTGGGTGATTTTCATCTGCGCAACAGCAATCTTCAAAGATTGGACTCCCGTAT  
CTAAGATGCGTTTTCGATAGCAGTACTTAGCTTCTCTCCAGCTTTCCGTAATAATAAGGAATCCGC  
ATCAACTACGTTATCAGCTAAACCTTTTACCAACTAACGCGACAAATCCTTCTCTGAACGTAAGGAACGC  
TCCTCTACAGAAAGAACTCTTCAATAATATCTGCATCTGTTGAATATCTTAAAGCTCGGATAAAGCTCA  
TAGCTAAATCTTTCTGCGACGTTTCTTCTATCAATATGGATATAGATAAGGTCATTAATGTCGAAGAC  
AGCTTCTAACCAACTTCTCGATAAGGAATAATTTTAAAGAAAAATAACAATTTCTTTTGAATGTTTT  
CTTTGTTCAAATGATTCCTGGAGAACGGTGGACTTGAGAAAAACAGACTCTCTCTGCCCATTAATAA  
TAAAGTTCCCTTATCAGTCATGATGGGATGGTTCCATATAGACTTCTTCTTTTAAATCCCCGTTTCT  
ATCAGTTAAACGGAACGAACCTTTTAAAGTAACACTATAGGTGATTCCCCGACGAATACACTCTTCTGGG  
GAGTATTTGGGCACTCCTAAGTTATAAGAGAGGTACTTAAATCGTAGCTTCATTATAAGACTTGATAG  
GGAAATTTCTCTGAAGACTTCTTCTAAACCAATGTTTTCTCGCTCTTTCAGCAAGCTTCCCGATTTGAAG  
AACTGCTTATACGACTTGATTTGAACCTTCGACAAGATTAGGAAGATCTAAATATCTTCTTTCTTTTGT  
ACGCTGACCCGCTCCGGGCACTTGAACATGCGAGCTCTCCTAAGACTTTAAGACTTTTGGCGATACCATT  
TCCTATTTAGTCCCTCTGTGATCTCTAAACAGGAATACGACAGATGCTTTTCAGCTAGGACAAAACAGA  
GCCTATCCAATACAGAGACACTGGATACTCCCTATACACTTGTCCATCCGACAAATACTATCACCTTGAT  
TCCATTAAGAAAACCAATTGCAACAATAATTTCTGTTTGGCGATGCAAAACATAAAGTTAAGTCCAG  
ACAAATCTGTTAAGACGTACCGGAACCCCTCTGTGCCAGCTACTGTGCAGCTAAACGAAAAGAGAAGC  
TTGCAAGTAACCCCAAAGCATTCTCTTTCCATAACAATTACAGCCCTTTAGCAACAGCCTTAGCACCG  
GCTTCTGTAACCTTCTAACAGTGTCTTCTGCATCACTTTTGAAGTTTTTTCTTTAACCGTCTTAGGTA  
ATCCTTCACTCATTTCTTTAGCTTCTTTCAAAGCTAATCCAGTAACCTTCTTAACAACTTTCAGAACCC  
GATTTCTTATCAGAAGGAACGCTTCCAGAATTACAGCAACTCTGTAGGCTCTGCAGAAGCAGGAGCA  
TCACCAGCGCAGCAGCACCAGCAACAGCTACTACAGGAGCGGCAGCAGTAACGTCCCCTTTCTTCCA  
ATAATTTTAAAGCTGAGACAATCAAGCACCGTCAAGCCGCTCAACTGTTCTACTAAAGTTTCCAACT  
TTCTGTTGTCACTTTGTACCCCTTATTTTGAAGTGTAAACTACTCTTGTAGTTTTTCTGCTTTCTGT  
GTCGACACAAGAAAACAACACAGAAAAGACTGAATTCATAATTCCTACAACCTTGAGACATAGGAGCAGCA  
ATGAGTCCAACAACCTGCTGTCTAAGCTCTTTCATAGAAGGCAAATTAGCAACGGCCTCAACTCTCGCC  
CAGAATAAGCATTATCTATTCTTCCAGCTAGAAAACCTAGAGAATCATTATGCTGTTTATTGAAATC  
TAACACTTGCTTTCGAGCAGATACTGGATCGCCATAGGCGAATACAACCCCAAGATGACCTTCGCTGTCT  
TCTGGATCCATTTCTACGCCAGAAGTCTCTAAAGCTTTTAAAAAATATTTTTTTCTTTAAACTTCAA  
CAGCAGAGACCCCGAAAGATTAATTTCTAAACTTCTAGAATGCGTAGCAGTAAACCCAGGTATCTCAA  
AAAAATAAACCTTGAGAAGCGGTATCTTTCTTCAACCTCGCGAAGCAGCAACTTTTCTCTTCTTTCT  
ATTTTCTCTTTTAAACTTAGAATTATAACGCAATCAACTCCCTAGTATCCACGGTAACCCCTGGCCCCA  
TGGTCGAGGAAATAGTGAAATTAACATAATATTGTCCTTTAGCAGTTGCGGGCTTAGCTTTAACTAAGGC  
TGCACACAACGCTTCAACATTTTCTTTGATTTGCGCACTATCGAAAGAAAGCTTCGCAACTCCGACGTTG  
CATAACCAGCTCGATCAGCTTTTAAATTCATTTTACCTTTTCTGCAGTTCCGCAATAGTTTAAACCAT  
CTGTTGTTACAGTTCCGGCTTTTAGGCGTAGGCATAAGGTTTCTTGGACCATAAACTTTTCTTAGCTTTCC  
GACCTCTCTCATATATCGGGAGTGGCAACCGCAACATCGAAGTCAACCCATCCACTTTGATTTTCT  
ACCAAGTCGTGCTACCAATAAGTCCGCTCCTGCTTCAATAGCCTCTGCAGCCTTATCTCCAGCAGCAA  
AACTAAATTCGCAACCTTTTACCTGTACCGTGAGGTAAAGAAAACGAACCACGAAATTTGCTGATCACT  
CTTCTTTGGATCGATCCCTAATTAACAGACACATCAACCGTTGATCGAAACGCACAGTAGGACACTGT

TTTAAAATATCTATCGCTTACC CAAA GAATACGACTTAGCTAAA TCGTAAGTCTCTTGGATACCACGAA  
TGCGTTTTTCATGC TTGTGCATAATTATGCAGCTCTTTAACTAATTACTCTACATCTACACCCATGCTTC  
GGCAGTCCCTTCAACCATTCTCTCGGCGGACTCTAAAAGAACGACATCCATGTCCTTCATCTTTTGCTC  
AGCAATTGCCGTAA TTGTGCTCGAGTTAATTTA CCAAC TTTGTTTC TATTAGGAATCTTAGATCCAGAT  
TCCAAGCC CAAA GCTTT TTTAATTAACGAAGAAA CAGGAGACTGTTTCATTA CAAA GAAA AAGTCTTAT  
CCGAGTATACAGTGATTACAACAGGGAG CAAATCACCTGGACGGTCTTGAGTTGCCGCAT TAAA CTC TTT  
GCAGAAATCCCATGATATTCACGCTGCAGCACC TAAAGCAGGACCAATTGGTGGAGCGGGTTAGCTTTTC  
CCTCCAGGGATTTG CAA TTTAATGAT TTTAATGATTTT TTTA TFCGACATATTCAACCCTACTCTACCTT  
AGTATTCCTCT CAAA ACGAGGGG GAAA AACGAAA AAGT TAAA TTATAAGAACATAGAGAATAAGAATACA  
CAGAA TTTCTTATTCTTACTCAC TTTCTTGCCCTGGCAGACTTCCTCTACCTGCCAGAACTC TAAA TCA  
TCGACGCGAGTCTCTCTTC CAAA GATA GAAA CCATAACGCTAAGCCGCCCTTTG TCGTGGAACTTTCCG  
ACACAACCCCAA CAAA GTTAA CAAA CACGCCGTCATTAAT TTTA ACCTGAGATCCCACTT CAAA CTTATG  
TT TTTG AACAACCC CAGATTT TTTCTCTTCTAGATCTGC TAAAAATATTT TTTATTTTC TTCTTCAGACAGA  
GCAACGGGAGCGCTCCCC TAAAAATTCAACTACACCCTGCGTCTTCTTCACATAAGACCAAGATTCAT  
CTGT TAAA TGCATCTTGACTAAGAGGTAGCCTGGC CAAATATACTTCTCAACGATCTTATGTTCCACC TTT  
CTTCAC TTCCATAACAT TCTCGGAAGGCAGGATGATCTGCTGAA TAAA ATCAGACATCCCTGAGGCTTCT  
TTAAAATCTTTC TAAA GACTTT TTTAC TTTCT TTTTC TTGAGCCG TAAAAACTTGACGACATAACCACT TAA  
ACATGAATCAAC CAAAGAAA AAGCTTGTTACTTTCACCTAACAAT GAAA GGGAC TTTTC GAAGAGC TAAATC  
CACACAATAGATG GAAA ATC CAAA GC CAAA AATATTCAT CAAA ACAATCTTGACGTATCTTTTAAGATCT  
CGCTTA TTTACCCACTCAATCTTCTTAA TTTCTTCGA TAAAGCTACCCG CAAA AGCTGCTTGT TTTT TTTG  
CAAA AGATACTTTCT TTAAGAAA TTTCTTCGGTGATCTTGCCCCATAAGCGAATCTTTC TTTTC AGTTACC  
TAATACGAGTGCGGAGGATTCGAACCCCCGACCGCGGGCTTTTG GAGGCCACTGCTCTACCATCTAAGCT  
ACACACC CAAA GGCAAGGCTTTTC AGCCTCGCCAACATATCACTTAA TTTATGCAATGATCTTAG AAAATA  
GTTCCAGCACCGATTGTACGACCACCTTACGAATCG CAAATCTCATACCTTCTTTC TAAAGCCACAGGGC  
TAATCAACTGCACTT CAAACTCAACGTTATCCCCAGGCATGACCATCTCAACTCCCTCAGGCAGAGTTAC  
CACACCTGTAACGCTGTTGTACGGAAGAAGAATTGAGGTCTATATCCTGTGAA GAAA GGGCTTATGTCTGT  
CCACCTTCTTCTTT TTTG CAGAACG TAAACAGCACACT TAAACCGTGTATGAGG TTTAACACTG TTTG GCA  
AG CAAA CAACCATCTCTC TTTTC CACATCGTTCTTACCAATACCTCTGAGGAGCAATCCAACATCTCTCTC  
TGCACGACCTTCTGGGAGTTCT TTTCTGAACATTTTC AACCCAGTAACAATCG TTTCTTTA GTATCTCTA  
AGACCGACCAACTGAAC TTTATTCG GAAAC TTTAACAATTCCACGCTCAATACGTCAGTTACTACAGTTC  
CTCGTCCGGAGATAGAGAACACGTCCTCAATGGGCATTAAGAAA GGCTTGTCAA TTTCTCTTTCTGGAGT  
AGGGATATTATCATCGACGGCTTGCATTAGCTCTCGAAC TTTCTCTATGTATGCAGCATCCCCCTTC CAAA  
GCT TTTTCAGAGCAGAACCCTCTGATGATTGGACACC TTTGTATCTTTCTCTCAAGAAGCTCAGCCAAC  
CCATCTCAACCAAGTCGACCAATTCAGCGTCTTCTTCG GAAATCATGTCAAT TTTA TTGAGAAA ACAAC  
GATGTAAGGAACCCCAACTTGTCTTGC CAAAAGAATATGCTCT TTTAG TTTGAGGCATAGCTCCGTCTGTT  
GCA GAAA CTACTAGAATAGCCCCGTCCA TTTGAGCCGCACCGGTGATCATGTT TTTA ACATAGTCAGCGT  
GACCAGGGCAGTCCACGTGAGCGTAGTGACGATTAGCTG TTTCTACTCAACGTGGGAAGCGTTAATTGT  
AATACCGGAGCTT TTTCTTCAGGAGTGTGTCAATAGAGCTATAATCAC GAAA ATCAGCCAACCCATCT  
CCAGACAACGTACGCGTAATAGCAGCTGTCAACGTAGTCTTACCATGGTCAACGTGGCCAATGGTCCCTA  
TGTTGATATGAGGCTTATTACGTT GAAAAG TTTCTTTTGACATCT CAAAATCTT CAAAT TAAA AATTAG  
TTTG CTACCGATATCT TTTG CCCAGAATAGGAATTGAACCTACGGCCACTTGCTTACCATGCAAGTGCTC  
TACCCTGAGCTACCTGGGCTTAGCA CAAAAGAGGAAGCAACCTAATTAGCATCGAAC TTTCCCGCAAT  
CAAA CTCTCAACCAGCCTCAACTAGT TTTCTCAACCCCTCAGCCGCAGA CAAA AGTGGCGCAGAATACAA  
CTGAAGATAATCTCGGTCTCGACACGAGCATAGTAACTT CAGACGCGGATTATTATCAAG TTTCTCTCT  
AAA ACTGCGTGACT TTTATTTATAAGGATAG CAAA ACAACCTTAACGATGTCTGTAGACAACACGAGCCTT  
CGT CAAATCATAAGTAGACAT TTTGACGGTACGCGATCTCCAACGAGCAAGCGGATATTACTCATACGC  
AT TTTTACCGCACAGATGCGCTGTAATGGGAACCCATCTCTAACATCACCC TAAA ATGCATGCCGGGCA  
ACAGCTCTTCCACTCTACCTTCTAGAACGATCGTATCTTCTTT TTTGCCATTCC TAAAAAACC TAAAA  
AACATCTATCTCTTGATCCCAGCAT TCAAACAAA AAAACAGGCC TGGGCACCCAATGAAGCTGCAGCA  
CCTGTTGTCTCCG GAAA ACTCGAGAGAGCGATTATATCGAC TAAA CAGAAA ATGT CAAA CAACTTGT CAA  
AAAACAGAAGGAAA AGTATCT TTTGACATTCTCTCTTGAGTT TTTGCGGGAATAA CAAATATTTT TTTAA  
TTTGTTTACAAG CAAA AACCCAATACCT TAAA CTTGTCTCTCTTAGACTCAATACTTCACAG TAAA ACTC  
CCCATCTTCCGAATGAGAAGCTTCGCTTCTGT TTTAGAAA AACAT TTTGAGACACTCTAGTTAGTCCTT



GCCTGAAATGTTGTCTCGGTATA TAAAGTAGAGTAGATAGGCCATGGT CAAA GCCGCTCATCCCCTACA  
TTCTTCTA TTTCCGGCGCGCTGCCCTTACATTCTTCGAGAGGGGGAGCTTATCACGATTCTCTAGGAGAT  
CTGCACCTCCAA TTTCTTTGACTCCGCCCCGATTATCCGTA CTACCCAGAGCCTGCT CAAA G CAAAA  
GTCGGGTACAAGCCGTAGCCAATACTATCGGAGACTT TTTACAAAGAAA CTGGAAGCACTTACTCTTGTA  
CATTCTTGCCTGGTCTCTTAT TTTAATTTGTCACAGTTCGGTTGCACTTGT TTTAAGCA TTTG GCTAGGA  
ATAGGAT TTTGAGCTGGTGTGTGCTTGGTATTA TTTCTGCTAA TTTCTAGATAAAAGAAA CAAA TACC  
CTCACT TAAACAGTC TTTGGAATATCACTAATCACGGATTACAACA ACTGGATCC TAATGGAAC TCGTCA  
GGTCTGCTTGCCACCGTTATTGCGTCGA TTTCTGCCCTTA TTTATGCCTCTCCTCAAGCTATCGGG TTT  
ATTATTGGAGCTTT TTTAGGACAT CAAA CAAGCTCGTTAGCTGT TTTATGGATACCGGTT CAAA TCAGGTC  
CAGGATATATTGCAGATCAGGA ACTG TTTGAT TAAA CAAGAAA AACGAATTCGACAAGCCATCATGCAGTG  
TCGGTTAATTTCGTAAC CAAATGGT TTTGCAACGCCGCTAGATATATTACAGAAA CGCGCCCATCGTCCG  
GGACAATCA CAAA CCATAACAATACGACCTCTTA CAAA CCGCAT TTTCTCTACCCGAA GAAATGGAACATG  
AGATCTTGGGCAA GAAA CCACAAGTAGTCATTGCTATGCTCGACAA TAAAATTGCTCAGCTCAACCAATC  
GCTTGTACA ACTCTATGACCGTCCAACACGAGTTATTGAACAATGATATTA ACTACCCTTCTGAACATA  
AAGCTTGTCTAGAAA AACAAGAGAAA GCTGTGGCTCTTCTCTTCCCAGAAA ACTTTG T TAAAAGATACTTT  
TTACAAA CAACTCTTACAGATTGGTCGCACAGCCAAGCCT TTTCCAAAAGAGTCTTGACAAA GAAAAT  
TTAGT TTTAGGTTGC CAAAGCGATC TTTA CCTCCATGGCGAGTT CAAA AATAACGCAGTGT TTTT TTTCA  
CCTATACCGAAGCTCTAATCTCTTCAGGCGTTGCTGTACTGTTCTCGGATATCTATT CAGGAGAAA CTCC  
CGAAA CCATTCTTACTTGCAAGCC TTTA TTT TTTGAGAAGTTAAGTCGACACCTATCCATGGGGAGATCT  
CGTGGAGGAGAATCTCTATTCTGAACATGCAACGTATAGCCGTTCAATATCTGGCTC GAAAA AACCTAAT  
GAGATAGCCAATGATTCTCATTGGCTATCTCCTCCTGCTCACAAGACTACTTAG TTTCTTCGACGAGCAT  
TCCTTACCAAGCGGAATGCTGTATAGA GAAA GTATAATAGCATGACCCCGCACCATATCATACGTATAAC  
ATTAAGCGTGC GCGCCACACCTGTTGTCTGAACATCAGTCTCA TAAA TCCCAGTAATAGATGGAAGAACA  
GGTCTGGTTGTGCTATTCCCCGAACATGTACTAGTATTA TTTA ACGACGGGGTAGTCGAATTGGCAATTA  
CTGTAGA TTTG GTGTAGAGGTATTGTTGCAAGGA ACTTCTCGACATATCTCTGGCAATCTTAAGC TAAAG  
CCGTCTATTCCGAGAAA CATTAGCTGCAC CAAA GCCCA CAAA CTACAGACACTA ACTCTACCGAAGTAC  
CAACGGCAGCATGTTGTCTAGCAGATATCGGTCTCTCCGATCATCCC CAAA TAGCTCTACCGCTTGACT  
TTG GATTCAGAGACCC TAGCCT TTTCTCTATATACACTCGGAGTTGTAATCCTCATGCCAATCCAA  
CAACTCTATCCATAAGGCAGGCCAATGCCTCTCGGCAATATC CAAA AGAATTACAGGTGTCAGAGTAGA  
CTCCATC CAAA AAAAA TAGGTTCCCTCAGGCAAGACTGGCGAGGATCAT TTTG AAGCAGCAACTGAATCGTT  
ACCCCGTAGCCGCAACTTAACTCCATAACTCCGACCAACCATGCCAAGAGGAGAATAACTTCGCAAGCA  
TCCTTAACATACGGGAACGTTGCGCTCTTCTTGACTATGAGTACACAATA GAAA GATTTCC GAAA GAAC  
TCCTCCACATAAGAAGCTGT TAAA TCCTGAATCCAACATATC TAAA GCTTCCCAAGATGCAGGGGTATAG  
GAATATGCAGCCTTGGTTGTAGTTAGAGTATGTCTACACAGAGTAGTCAA CAAA AGAATCAACCGTACAT  
AAGAAA AAGGGAAGGGATTGCTGCTCGCACAGAAGAGGTAATATCCTCATTTAAA GCTGCATA CAAA CG  
CG CAAA AGCAACACTATCTTCTGAGGATACTACTCGAACAAGTTG CAAA CGAGAAGAGTCCGAATCCTCA  
CTAGTAGGAGAACTCGCTGCAGA CAAA GAACTCAATCCTGCAAGCCGCATAAA TCCATACG CAAA CCAA  
GTT CAAA GCATGCATCCCCACTCCAGGAGTAATAC TTTGTGAGTGAGGAGAAA ATGGAACATGT GAAA C  
ACACCCATCTCTTCGGGCAGACAGGTATCCACTCATATCTAGAATTGCTCCACA ACTACCAGGACTTGTG  
TAGAAA TGTCTATTGTGCTTACTGTTA CAAA AAAATGATGGATTAATTCCAACAACCCGAATACGAGCAC  
GCTGTAACGGACAGCTAATCAACTGAAGAGCTCTCTCA CAAA TAGCCCTCCATCGCCATAG TAAA TCTG  
TAAA AACCGCCCATCAGACACCCTACT GAAAA ACCTATCCCAAGCTCTCAA CAAA GCTTGTACCGTAGGG  
TGATGAGCAGAAA TTG GAAA ACAGCCCGCCACCCCTAGTCTCTAGCGAGCAGGTTACAGGCCATTCAC  
CAGCATTAGGAATCGCAGTCACAGGCTGAT GAAA GAGTTCGCTCAACT GAAA GCTCTCTCCCCACACT  
ACGATGAGTTAACCCTAGCATTAACGTATCCTACTTCAA CAAA CGGTATTGATTGTCGTCGTCATCA  
TCATCAC TAAA ATCACATACACGCACTCCAGAACGCCTATTTCGAGCAGAATCAAGACT CAAA TCTATCA  
AA TCTGAAGAGGGACTGCTATCCCCCCCCAGTAACACT CAAA TGTCTGCAGTAGCCTGAATCTGCATA  
GAAGCAGAACTCACAGATACCCCATCTTCTGGTGAAGAACTCTGAACTCGATTCAGTGGTATTCTCTT  
CGTCGCTATGTATGCGACAATAAGGTGTGTC TTTA CTATTATTGGAACATGGATCAGGCATATCTTCTCC  
CTAAA GCGCCCCCTTTAAA ATTGTTA TTTAACAACCA CAAA TGCCTC TAAA CGACCCAATCCCCCAT  
TGCCATGAAC TAAA AA ACTTGTGATCGAGT CAAA AAAAAGCTC TTTG CTAGACC TTTAGGTCTAA CAAAG  
AGCTTTA TCATCGTTCGCAATTACTAATCTCTTCTGCTTAACCTCCTTCGGTCCACCCCTCAGTCAA  
AGAAA CCAACG TTTG GTAACAGGATGCATCA TTTG AGA GAAA ACAA CTTCATAGGAAGCAATCA TTTGC

GAA CAAA CACACCCAGAGAACTGCTGCTGCAGACCTGACTCTGAAATCAAAGCAAAAGCGTTTCTAAAAC  
TGAGTGTGTTTCATATATG GAAATAATTTTAAATATGGCTCAAGGTTTATTTCTTCTTAGAAAA TAAACT  
CAAGAGCTTTTCACTCGCTTAAA TAACTGAAAATGAGATCCTCTAATTCAACAATCTTGGGAACAA TAAA  
ACATTTTGGACCCAAGCTTGGTCACACCCGTCTCTAAGAAGTAGGCA CAAATACTATGTTGAA CAAAACA  
AGAA GAAAACGGATGAGCCCATGTC TAAAAGCCCTCTGTAGACCAGAAGGCTTGC TTTGACTTTGTAAC  
GATTA TAAA CTCTCTTGATTTTCGGTCTCTATCCTTAAGTACTGCTCGAACCCGTAACCGGAGTCCCTC  
GAATTACACCAGAGGATCTAGTTCTGATTACACAACACCTTGTACTAACATCGACTGATGAGCATCTAA  
AAACAATACACAATTTGTTACTTAAAACGACTTTTAGGCGTTCATCATAA TAAATAAAAAGAAA CCAAGG  
GAATAGTATCGATTTCAAAGAAAAGGCGCAACGA TAAAACAAAACCGTCTTAAATAAAAATTATAATACC  
CTGATAAGCTTTTGTCTTGT CAAA CATTAGCCACCTATGATAAGCTTCCCTTCTTCTATCCTGGGGCAAT  
AGCTCAGCGTTAGAGCTGCGGACTCATAACCCGTAGGTCCCTGGTT CAAA TCCAGGTTGCCCATTTCTT  
GTCTCCCGGTCTA TAAA AACTCTCCCTC TAAAACAC TAAAGTGTGAACTCGACAGTTCCTTAGCTGAGT  
TTA TCAATGCCTGCAT CAAAAAATATC TTTGCG CAAAATGCCTGGGCGCTCTACCCAGAAGACACATC  
AATCCCCCTGGGATTGAGAAGACTGATACCTTC TTTGATATTC CAAA GGTTGACTCCTCCACCAACATC  
CAATTATTATGTT GAAAAGGAGAGAATGC TTTCCAAT CAAAAGGAGAGCCTCTTTCTCCGCCAATGTGGT  
CGTATACAACAGTTACTGCATCGTTCATTGGGGCAGTGTGCAGAGGGCTGTCCATTAGAA TAAA CGGA  
TACAACATA GAAAATA GAAAATGCTCTCGTAACTGAGAAAATTTGAATAGAATATCCTCTCCAGACAAC  
TGGATACTGGTAATCCCTGTGCGCTCAGTAATAGC TAAAATTTCTTCTACTGAATGCTCTGGGAATACTC  
CAACAGGTTCCGAATTCCTTCCCTGTATAGCCTCTACGATATAC TTTGCTT TTTCTTCACTCACACATCT  
TCGAGAATC TTTAG CAAAATCATGCCAATGTAATCGGCTCCCGCTTTGGCAGCTTCCCGAGCATCATCA  
GGATGCGTAATACCA CAAATTTTCACCTTCATACAA CAAAGGGGC TAAAACCAACTA TTTAAG CAAA TTC  
ACAGAAA AAGTAAGACAAGAAGATCAGCATATCCAAGAGTTTATAT CAAAGCAATAGAAAATAAA TCAT  
ATAAAAATAAGCCTCCCTTGCAAGAAA TCGAGTATTACGCTTTTGATCTATCTTACAAAATACATGCACAG  
GTTATTAG CAAAT TTTATGTTTACAGACAAAGAAA CTACAGAAA ACCATTTCCA ACTTGGGCCACCT  
TCTCCACTCTGAGCCAT CAAAGCAA TTTGTTTTCGGTAATTG GAAAATGAACAAAACGCTTACCGAAGCT  
CAGACCTT TTTAAA AAG TTTCTCTCTAGTGACATTTCTGTCTAATCCC CAAATCATTACAGGAATCATTC  
CTCC TTTACACTGCTGTGCTAGCTTGTCAACAAGCTGTAAGCGATTCCCCATC TTTCTTGGAGCC CAAAC  
CACTCATGAAGCTGACTCAGGAGCTTTTACTGGTGAGATTTTCAGCCCCAATGCT CAAAGATATCGGAGTC  
GATTTTGTCTCATCGACATTC GAAAGACGTCAATCTTTTCATGAA CAAAATCCTGTACTTGTCT GAAA  
AAGCTGCTGCAGCTATCCATAGTGGAATGATTCCAGTTCTGTGTATTGGAGAAA CTCTAGAAGAACAAGA  
ATCTGGAGCAACTCAAGATATTCT TTTAAATCAACTGACTATAGGATTATCTAAA CTCCCTGAGCAAGCC  
TC TTTCAATTCTAGCTTATGAACCAGTCTGGGCTATAGGCACCG GAAAAGTAGCTCATCCTGATCTAGTTC  
AG GAAA CCCATGCT TTTCTGTAGAAA AACGATTGCTTCTCTCTTTTCCAAAGATATTGCGGAACGCACCCC  
CATTC TTTACGGAGGATCTGT GAAA GCCGATAATGCTCGCTCAC TTTCCCTCTGCCCTGATGTGAATGGT  
CT TTTAGTTGGAGGAGCCTCT TTTATCTTCAGAGAA TTTCTTATCCATTATACAA CAAATCGATATCCCAT  
AACTCACACGTACCTATGTCGATCACATCCCCCTCTATAGAAG TTTCTGTCTGACAGATTCTATTAAGA  
ATCT TTTAGAAAAAAT TTTCTTCGCGTAGTGGT TAAAGGAGAACTTAGTAACGTCTCT TTTACAAA CAAG  
CGGTCATTATAT TTTGCTAT CAAA GATAGCAAGGCTGTACTTAACGGAGCTTTT TTTTCATTTCCGTAGC  
AAA TAC TTTGACCG CAAAC CAAAAGATGGCGACTACGTGATTCTTCATGG GAAA CTCACAGTCTATGCTC  
CTAGAGGACAATAACCAGATTGTGGCCTATGCTCTCACCTTCTCCGGAGAAGGTAA TTTGCTGCAGCAATT  
CGAAGAACG CAAA CAACGTCTCGCTGCTGAGGGATA TTTCGATCC TAAACG CAAA AAGCCTCTTCCTTCA  
GGAGCTCGCGTAATAGGGGTGATTACAAGCCCTACAGGGGCTGTCATTCAAGATAT TTTACGAGTTC TTT  
CTCGCCGTTGTCACCAA TTTCAAGTCATCTTATATCCAGTGACGGTACAAGGAGCTACTGCGGCTCAAGA  
GATTTCTCAGGCTATTC AATTTTCAAT CAAAACAGTATGAGGGTCCACGCTCTTATCATCGCAAGGGGC  
GGTGGAAGTATCGAGGATCTCTGGCT TTTAATGAAGAAGAGCTAGT TAAATCTATTGTAGCAAGCTCCA  
TTCTATTA TTTCTGCTGTTGGTCACGAGACTGA TTTCACTCTCTGCGACTTTG CATCCGATGTTCTGTC  
TCCGACCCCTCTGCAGCAGCA GAAA TTGTATGTAAGAGTAGTGATCAATACCGCCAAGAAGTGC CAAAAT  
CTACGGCGCTACGTCTCGTCTCATGCAAGACAATTTAATTGCAGC TAAAAAAAACCTTCTCACTCATTTGGC  
AAAGACATCTTGTCTCAGTAGATTTCTACCACACAGCACAA CAAAC TTTAGATTACACCCGAGCGGCCTT  
AGAAA GAGGGATA GAAA CAAA CTGAATACTA TAAA CAACGATTTGCGCAATATAGACGCTGGTT GAAA  
AGCGATGT TTTGATTCGTATAGAAA AACATTTGGCGGATCTGAACCAATCTCTTATGCT TTTCTA TAAAAA  
ATAAAA TTTATACAAA AAAAACTCTC TAAA CCAGCTATACACTTCTTGTCT CAAA AATGAACTACTGAA  
TTTA CAGCACCGCACGCAGCACTCGCGGAATAT TTTAAGCCAGCTATCTAGGAGGCTGCATATCGCGATT

GCAAGCTCACAA**CAA**CTCACCAAGAGT**GT****TTTG**GTTCGTCTTCAGAACGAAC**TTTCTTT**ACAATACAAC  
ACCTGCTAACTAAGGC**GAAA**GAACGGTGCCAGGCTATACAAGAACAAGCTTCC**TAC****TAAATC****CAAAA**  
TG**TTTAAAA**AGAGG**TTTG**CCCAGCT**TTTGAC****TTTAATAAA**CAC**TTTG**TTATCATCTCTGCGGAATCT  
CT**TAAACAAA**GTGATCTTGTGCGGGTCTGCCTCCAAGACGGTGAAGCAGTTGTATCAG**TAAA**AGAAG**TTT**  
**GGCTTA**CAATGA**CAAA**AAAGGC**TAAA**AATGTG**GAAA**AAGTCCCT**TTTGA**AGACGCTAT**GAAA**CG**TTTG**  
AAGAGATCATAGACCTTATGAATCAACCAACCACGTC**TTTA**GAAGCTTCTCTTGCCTTGTATGAAGAGGC  
TGATCAATTAATGCGTATATGTGAGTCTCGCATTCAAGAAGTGAAGCAGTAT**TAAA**CAGC**TTTC**CGAC  
CAACGGAGCGAATCGTAGCCGGTCATGCAG**GAAA**TCCTCGGTACCTGAAGCAAGTCATCTGGACACCGTTA  
TACAGCGCTTCTGGT**TTTA**CAGAAGCGCTTGAGGACTGTCA**TTCC**GTGGAAGCTATCTTGGCTATCTA  
TGAG**GAAAT**GT**TTTC**CTTATTCAAGAAGGA**GAAA**CAA**TTTG**AACCATGTGGAACAGCTGAGT**TTTC**CAG  
CTACAAC**TAAA**CCCCGATGGTCTGTGCGCAGTAGATACTTCAGGCAATCCCATTAAGCATCCT**TTTA**TCC  
CTGGGGAATCTGTATGACCTACTCCCT**TTTG**CCACACATCCACTCTCCTCAAGATCTTCATGC**TTTA**CT**T**  
**TTA**GATAAGCTCCCTGTATTGTGTGAT**GAAA**ATTCGTAATAAGATTATTGAGAGTCTCTCTTAACAGGTG  
GCCACTTAGCTTCTAA**TTTAG**GGTGGAGTAGAGCTTACCGTTGCTCTGCATTACGT**TTTC**TCTCACCAGA  
TGATCAG**TTTA**ATT**TTG**ATGTGCGGCACCAATCCTATGTACATA**TAAA**CTATTAACAGGCCGCAACACAGAA  
GC**TTTC**TCCAATATACGACATGATAACGGACTCAGTGG**TTTA**CAACCCCCAAGAGTCGAACCATGATA  
TATT**TTTC**TCTGGTCATGCGGGCAATGCC**TTTCTTTAG**CT**TTA**GGGCTGGCCAAGGGTCTCT**CAAA**TAG  
CTCTTCGCATATACTACCTATTCTTGGAGATGCTGCT**TTTC**TTGTGGCTTAACACTAGAAGCT**TTTGA**AT  
AACATCCCTGCTGACTTATCGAAGTTCATTATTGTCTGAACGACAAC**CAAA**TGTCGATCTCAG**GAAA**ACG  
TTGGGAATATTCTCAAGGAATCTCCAGTGGATATATCCT**CAAAA**AAATAAG**TAAA**CTATCT**CAAAA**AT  
TCACTCTTGGATACAGAATCTTCCAAGT**TTTC**TACA**CAAAA**AGAAGAC**TTTA**TCGC**CAAA**GTAGATATC  
GCTCT**GAAATC****TTTA**TCCCATCC**TTTGT**TTGAACAG**TTTG**GCCTACATTACGTAGTCTTATTGACGGAC  
ATAACGT**CAAAA**AGCTTGTTC**CAAG**CTCTG**CAAA**TGAT**CAAA**GACCAGCCTCAGCCTATTCTGT**TTTC**ATGT  
GTGTACAG**TAAA**AG**GAAAT**GG**TTTA**ACTGAAGCT**GAAAG**AGACCCGATTTCGCTATCATGGAGT**GAAAG**CG  
CAT**TTTCCAAA**ATACCTCT**TAAA**AAAAACCTCTGGCAATGTTGAATTA**CAAA**CCCCGA**TTTC**GTCCCTC  
AACATGCCGGGAATATCCTATGTGACTGGGGAA**GAAA**TATCCTCAATTGCAAGTCGTA**ACT**CCTGCCAT  
GCT**TTTAG**GGTCTTG**TTTG**GAAGA**TTTC**CG**CAAA**CAATCC**CAG**ATCG**TTTC**ACAGATGTAGGCATAGCA  
GAAGGT**CAT**GCTGTCACAT**TTTC**GGCAGGAATAGCTCGTAGCGGCACCCCTGTATGCTGCTCTATATATT  
CTACTTT**TTTA**CACCGGGCTATGGACAACGTATTCATGATGCTGTATGCAAGAGCTCCCCGTGATCTT  
CGCTATTGATCGTGCAGGGCTAGC**TTTC**CACGATGGACGTAGCCACCATGGTATCTATGAT**TTA**GGCTTC  
TTATGTTCCATGCCGAATATGGTCA**TTTGT**CAACCACGCAACGCCCTTGTCTT**GAAAG**ACTATCT**TTT**  
**CTTCT**TATTATG**GAAAT**CTCCTTGTGCCATT**CG**ATACCCTAACATCC**CAG**CTAATGA**GAAA**GCTTCTAA  
CAGTTCCTCCCT**TTTC**TCCATCTTCCCTGGAGAGGCTGAGATTC**TTTG**CCAAGGAGATGA**TTTA**TTG  
TTGATAGCTCTTGGGCACATGTGTAACACTGCTCTAACCGT**CAAA**GAACATCTCTAGATTACGGAATCT  
CAACAACAGTTGTTGATCC**ATT****TTTA****TAAA**CC**TTTG**GATC**GAAA**ACTCCTACAATCCCTACTTACCCA  
CCACTC**CAAA**GTAAATCAT**TTTA**GAAGAACATTCTATTCATGGCGGCTTAGGGTCAGAG**TTTC**TCTT**TTTC**  
**TTAAA**CCAACATAATATTAAGGCAGATGTTCTCTCCCTCGGAGTACCAGATATG**TTTA**TCCCGCAG**GAA**  
**ATCCT****GAAACT**AT**TTTAAATTTG**ATTGGACTCACAGCGATCACATCAACGAATCCT**TTTC**TCAT**TT**  
**TAAA**TTCTCCACACCCATTCCATCGAACGCTT**TTTAAAG**CGTAGCGATTGCGGTTGC**TAAA**TAT**TTTG**  
TATAGTTGAAGGCTTC**TTTC**AT**TTTC**GGATATTCTAGAAGATATTCTACTACTAATACCGGTATCCCGAT  
**TTA**TGATCGCTAGAAC**GAAA**ATTA**TTTG**TACGATAGGCCCTGCAACGAATACCCCTGAGATGCTG**GAAA**  
GCTTCTCGATGCAGGGATGAATGTAGCTCGCCTTAAT**TTTAG**CCACGGGACCCAT**GAAAG**CCATGGCCGG  
ACCATCGCTATTCT**TAAA**GAAC**TAC**GAGAGAAGCGCCAAGTTCC**TTTAG**CTATTATGCTAGATA**CAAA**AG  
GTCC**GAAAT**TCG**TTTAG**GCCAAGTAGAATCTCCTA**TAAA**AGTACAGCCTGGGGATCGTCTTACTCTCGT  
TAG**CAAAGAAAT****TTTAG**GGATC**CAAAGAAAG**CGGGCTTACTC**TTTA**TCCAAGTTGTGTATCCCTTATGTT  
AGAGAACGAGCTCCTGTTCTCATTGATGATGGGTATATCCAAGCAGTGGTGGTCAATGCTCAAGAGCATA  
TGGTG**GAAAT**AGAG**TTTCAAAA**ATTCAGGA**GAAATAAA**ATCCAA**CAAA**TCTCTTAGCAT**CAAA**GATATCGA  
TGTTGCTCTTCC**TTTC**ATGACAGAGAAGGATATTGCAGACT**TAAAATTTG**GGGTAGAACAAGA**ACT**CGAT  
CTTATCGCTGCTTCGTTCTGTGATGTAATGAAGATATTGACAGCATGCG**TAAA**GT**TTTGGAAA**GC**TTTG**  
GTCGTCC**TAAT**ATGCCCATCATTGC**CAAAATA****GAAA**ATCAT**TTA**GGAGTA**CAAAA****TTTCCA**AGAGATCGC  
TAGAGCTGCTGATGGTATCATGATTGCACGCGGGGATCTTGGTATTGAATTGTCTATTGTTGAAGTTCCCT  
GGACTA**CAAAA****TTTA**TGGCCCCGAGCATCGAGG**GAAA**CGGGTCCGGT**TTTG**TATCACTGCAACG**CAAA**TGC  
TCGAGTCAATGATT**CG**CAACCCCTTCTTACACGAGCCGAAGTCTCTGACGTTGCCAACGCCAT**TTA**CGA

TGGAACCTCTGCAGTCATGTTGTCTGGAGAAACTGCCTCAGGAGCCCATCCTGTACATGCAGTAAAACA  
ATGCGTTCCATTATCCAAGAGACTGAGAAGACTTTCGATTACCACGCTTTTTCAGCTGAACGACAAAA  
ACAGCGCTCTCAAAAGTTTCCTCCTTATCTTGAAGCCATTGGGTTTCGGAATCCTCAAAATTGCAGAAAAGC  
ATCTGCCTCAAGCCATTATTGTGTATACCCAGACGGGAGGATCTCCGATGTTTATACTCAAAATATCGACCT  
TATCTCCCTATTATTGCTGTTACCCCTAACCGCAATGTGTACTATCGTTTAGCTGTAGAATGGGGAGTAT  
ATCCTATGCTAACCTGGAATCGAACCGTACAGTCTGGCGTCACCAAGCTTGTGTATATGGAGTAAAAA  
AGGAATTCCTTCTAACTATGATAAAAATTCTTGTCTTCAGCCGCGGAGCTGGGATGCAAGATACCAACAAT  
CTCACCTTGACAACCTGTGCATGATGCGCTATCCCCCTCTCTTGACGAGATAGTTCATAATCATTGAAAC  
CATATAGCAGGTATGCTTCTATCGTTAGACTTTCGGTATTACTGTAAGGAATTTAAAAAACATTACAG  
TAGAGTTTGTCTCGAGAGATCGTTTGTTCACCGGGTTTCGGATCCGAAAATCTTCTCTTGCCTT  
CAATACTATTTATGCGCGAGGAAAGAAACGCTACCTTGCTACCCCTCCCTCTTTCCTTGCAACCAAGCTA  
GACTCCTTACCAGATCCCTCCGTAAAAGATAGAAGGATTGTCTCAACCGTAGCCGTTAAGCAAACT  
TTTCGAACAACACGTACATGCGACAGTCCGTAGTACAACCAGAAATAACTCGTATTTAGCCCTACTTTT  
CTCCTTAGAGGGCCAAGCCTATGATCCGGTTACACTACCCCTCTAACTCTATACAGTAAGAAAAAATC  
CTTTCGAAATAGCTGCCATTCCAGATGGAACCTCAACTGACTTTGCTCGCTCCTCTTCCCGCCAGGGATG  
TTCTTACCGTTGAGAAATGTCTCCGTCAAGGGTTTACCAAGTCCCTCATTGATGAAGAGGTTGTTCTTAT  
TCATAAGTTTCTTACAACAGGCATTCCTGTTCCCGTCAACTCATTGTGCGATACGTTGATCAAAAATACC  
TCTAACACTCCCGGTAAAAGTCAGCTTATTTAACAACCTTAGACATCGGTCATGGTGAATGCTCCTTAC  
ACTTCGATAATCAAGAAACGAGTCTTTCACACAGGCGACTCTTCCAAGAACACAAACAACCTATGCGCC  
GCTATCCCAGATCTTTTTCGTCGCACAGTCAAAAATGATCGTTGTCCACAATGCCAAGGTTGAGGAATC  
TTTATATCCATCGATGATCCCTGTATCATCCAGCAAAACGCTCTCCATCGAAGACAACCTGCTGTCTTTC  
CAGGGAATTGCTCCACCTTCTTATATAGAACCATCTATCAATCTCTAGCTGATAGCCTAGGATTTAGTCT  
CAGCACTCCGTGGCAAAATCTTTCCTCTGAAATCCAACATATTTTTTTATATATGGAAAAAGGTTCTCTCT  
ATCCAGTAAAGCTGTTTGTATGGAACTTTAGGTAAAGAAACCCAGACACATAAGCAATGAAAGGTTGTGC  
TCAATGAAATTTGGAGAAAAAATTCGATTTTCAAAATAGCCTGCTCGCTACCTTCCATAAGGGACTTCCTA  
TACAGTATGCCCCAGATGTAACAAGACTGGACTCAGCGACTATGCTAATGCTACCCGATGGCATGGAAAA  
AGCTTTGCGAGACTTTCACCAAAATGCTCTTCAAGAGTTATTTATTTTCCTGAATCAACTTCCTAAGAAAG  
AGCTCGCTATTGAGGAAGTAATCCAAGGATTCAAAATCGCGACTTGCTATTCTGATAGATCTTGGTCTTCC  
CTACCCTTTCCTCAAGAAAGAGCTATTGATACTCTTTCGCGGGGAGAACGGGAACGTACGGCCTTAGCTAAG  
CATCTAGGTGCCGAACCTCATCGGAGTCATGTATATCCTGGATGAGCCTTCTATTGGGCTACATCCTCAGG  
ATACCATAAGCTTATGAATGTTATTTCGAAGACTCCGTGATCAGGAAAACACTGTCTTACTCGTTGAACA  
TGATGAGCAGATGATTTCTCTCGCAGACCGGGTCAATTGATATCGGCCAGGAGCTGGTATTTTTGTGGC  
GAAGTTGTCTTCAATGGATCTCCTAGAGAATTTCTGGCAAAAGAGTGACTTTTGACCGCACAATATCTCC  
GTCAAGAGCAACATATTTCGGTCCCTGCTAAACGTAACAACCTCTTAGGGACAATTACCTTATCTAAAGC  
CAATAAGCATAATCTTAAGGACCTGACAGTTTCAATTCCATTAGGACAAATGACTGTCTCACCAGGATC  
TCTGGTCTGGGAAATCTTCTCTTATCAACGATACACTAGTCCCTTGTGTGGAAGAGTTTATTTGAACAGG  
GATTCTGTCTCACTCTATCTATTCAAGGAGCCCTCTCTCGCCTTGTCCATATTAATAGAGATCTTCCAGG  
ACGCTCACAAACGATCTATCCCCTTGACCTATATCAAAAGCTTTTGACGAGGTTGTCAGTTATTTCGAGAA  
CAACCTCGCTGTAAAACCTTAGGACTCACAAAAGCCACTTTAGCTTCAACACGCCTCTAGGAGCCTGTG  
CAGAATGTGGAGGCCCTAGGATCTATAACAACGACTGATAACCGCGATTCCATAACCTGTCTTCTCTGTT  
AGGAAAAGGATTCCCTCCCTCAAGTATTAGAAGTCCGCTATAAAAATAAAAACGATTGCCGACATCTTGA  
ATGACGGCCTATGAAGCTAAAAACTTCTTTTATGATGAGCCTAGTATTCATCAAAAATCAAAACCTTAT  
GCACTCTGGGACTACAATACCTTCTCTAGGAAGACCTCTCTATAGCTTATCTGGAGGAAAAATCCAGAG  
ACTCAAGCTTGCATATGAGTTATTGGCTCCAGTAAAACCCCTACTCTCTATGTTCTTGTATGAACCCACA  
ACAGGCCTCCACACCCACGATGTCAAACAACTTATTTATGTTGTGCAATCCCTTATTCATCAAGGGCACT  
CGGTGATCATCATCGAGCATAACATGCATGTGGTGAAGTTGCAGACTATATACTGGAACCTTGGTCCCTGA  
AGGAGGAAATAAAGCGGTTATCTCATAGCTTCTTGCTCTCCAGAAGAGCTAATCCAATAACATACTCCA  
ACAGCTATAGCTCTCCGTCTTTCCTATCTTCTCTCAAGAACCTCCCTTATCTACCTGATCCGAGTCCCA  
AACTCCTGTACCCGCGCCATTACTATTGCAAAACGCTCACCAGTATAATTTAAAACATATCGATCTCTC  
CATACTCGATATGCGCTTACTGCTGTGACAGGTCATCCGCTTCCGGGAAACATTCCTTGTATTTGAT  
ATTCTGCATGCAGCAGGAAACATCGCTTACGCAGAGCTATTCCCTCCCTATATCCGACAAGCTCTCATAA  
AAAAACTCCTCTTCTGTGTTGAATAAAGTAACAGGACTATCCCTGTTATCGCGATAGAAAAACGAG  
CGCTCGAGAAATTCCAATCATTCTGTGGCTTCTGCATTAAGAAATCTCAAGAAATGCTAGAAAGCCTTTC

ACACGAATCGGCCATCCTTATTCTCCGATTTCTGGTGATGCACTAAGAACTATTTCTCCTGAAAAGATTG  
CTGAAGAATTGCTCAGCATTACACGAAAGGCTATGTAACGATTACTGTTCCTTTCCCTAAAAGAGGAAGA  
GTTTTTCTCTTATACGCAAGAGATGCTTCAGGAAGGTTTTTAAAACTTTATGCTAATGAACAGTTCTAT  
GATTTAGATGGGCCTTTCCCTACTTCTTTAGAGAACCAGCTCTAGTCATCCACCATGTCAAAATTTTAG  
AAAAAATCTGCCTTCTCTTTTGCTTCTCTTACTTTAGCCTTTAGTAAAGCTTCTTCTGTCTGTCTGCA  
TATCGAATATGCTGGAACAAGCTTATCTAAAACATACCGCCAAGGATTACAAGATGCTTCTGGGAACCTA  
TTCCCTAATATAGAAAACCCCTCTATCTTGAACCATGAGAGCTACTTATGCCCTCTCTGTCTATGAAAAG  
GCTTCCCTATCCACTTGTCTATTCTTCTCCTATAAGAAAAGTTTCTGCACAGCATAACCCCAATTTTCTTATT  
CACAAGCCTATTTCTCTAACCAGGATCCTTACCAGATCTATCCTCTTCTGAATGAACTAGGGATCCCTTCC  
ATTGCTCTATTCCAAAGAAATAGATGTTCTTTCTTTTGAATCTCTTTTGCTTAGGAACACAACAACATCTGG  
GATTGAATGCTCTTTTGCAAAAAGCAATGTTAATGGAATCCGAAGAAGATTTTCCCTCCCGACCTTATCTC  
CAAAACTCCGTGTAACCAATGTCAGGGTCTTGGCGTATACACCTACAAGCATTGCATCCGTATTCACAGC  
ATTTTCCCTATCAGAAATTTTACCAATCCAATGTGCGTTTCTTAAAAGCTCTTACTTTTCTGTAGAAGAGG  
AACCTCTCTTGTTCAGATATCCTTAGTAGATTGGACCTTCTAGATCGAGTTGGGTTAGGCTATGTTAT  
CCTCGGACAAGAACAACAGTCTTTTGAGTGACGGAGAGCATTATAGGCTTCTATTGGCAAAAAGCTTTTTC  
TCAGGTCTCACTGATGTTATCTATCTTTTAGAAGATCCCTTAGCAGGGATTACCCGGAAGATGCTCCTT  
GTTTGCTTGCTGTTATTAATAAACTCGTGACCAACCATAATACAGTAATAGTGACGGATAGAGAAGGCTC  
TCTTGCGGAACATGCTGATTACCTGCTTACCTGGGTCTGAACTGGTCTAACGGAGGCTATCTCTTA  
TCAACCAGCGCTCTTAAAACATCTCAACCGGTACTTTTGCAACACACGCTCTTCCGAAAGAAACACCACAAC  
TTTCTGTCTCAGTATCCACTTCTATGATCAAAATGAGAACCTTGCCTTCCCTTTTACAACGACTCTCGAC  
TATTTCTGGTGTATCAGGATCTGGCAAAACAACCTTACTAAAATAGCATTTTACGAACATGGCTGCGCTATT  
CTTGAAAAGGATCCTTCTGTATTCTCAGAAAATTATTTTTCTAGATTCTTATCCCAAAATGTCATCTTCTC  
GATCCGATATCAGCACTTATTTTGATATCGCTCCTTCATTAAGAAATTTCTACGCTTCTCTGACTCAAGC  
AAAAGCTTTTAAAACATCTCAGTTTCTATGTTTAGTCAAAATACCAAAACAAGGGCAATGTTCCGATTGTTGG  
GGACTAGGATATCAATGGATAGATCGAGCCTTTTATGCTATGGAAAACGTCCTTGTCCAACATGTGGAG  
GATTCGCTGTACAACCACTCATAACAAGAAGTTGTGTATGAAGGGAAACATTTTCCGCCAGTTATTACAAGC  
CTCTTTAAATGAAGTAGCTGAAACTTTTCTTTCTTAAAAAAAATCCAGAAACCCTTTACACACCTTAATT  
ACAAAATGGTCTTGGCTACTTATCATTGGGACAAAATATGGCCTCTCTGTCTCTAAGTGAAAAATTTGCCA  
TAAAATTAACATAAATCATCTATTCTTCTCCTCTAAAATCATCTACTTTTATTCTTACTAGATGAGATAGCTAC  
CTCTCTTGACAATCAACAACAATCCGCTCTGCTCGTCCAACCTCAACACCTTGGTGCTTTTAGGACATACA  
GTAGTGATCATAAGAAACCACCCCGCTTCTCTCAGCAAGCTGATTTTGGGATACAAAATGGGACGTAAAA  
CAGATAATCACATCTCTTTTGCAAGACCTAATCCCAATCTATCTTTTCACTTAAAGCCTCACCTTAAATAA  
AATTTGAGATACGCTTGCCTATTCTTGGATTAGCTAGATGCCGTAAAATTTATGAGACAGCTATAAAAA  
TATACTCTCTCTTTTACGAAGTTAGAGTAGATTAATACAGGGGAAAATGCGTAAACTAATCAGCAAGAG  
ATTAGTGAACCCATTCATAGTTTCTTTCATCAAGAATAGTATAGCATGATTCTTTTAGTTATGACCTCTT  
ATCAAGTTTCTTCAAGAAGGTACCGCCCGAACAATTTTTCGAGATTCTTGGCCAGGATATAGTCGTGTC  
TATACTCAAGAATTCCTGCGTCTGAATCGCGCAGCACACGCTACATATTTTCTGGTATTCTGTTGGACA  
GGCAAAACAACGTTAGCCCGTGTAATTGCTAAAAGCATTAAATTTGCAAAATCCTACACAAGATCAAGAGC  
CTTGTAATCAATGCGCTATTTTGCAAAAGAGATCTCTTGGAAACGTCATGGATGTTATCGAAAATCGATGG  
TGCTCTCATCGAGGAATCGAAGATATCCGGCAAAATTAACGAAACAGTCTCTCTTTGTTCCCTTCAAAATCT  
CGCTACAAGATCTATATTATTGATGAAGTACATATGCTAACAAAAGGGCTTTCAATTCTCTACTAAAAGA  
CGTTGGAAGAGCCTCCTGCGCATGTGAAATTTTCTCTTGGCACAACGGAAATTTGCAAAAATTTCTAATAC  
AATATCCAGTCGCTGTCAAAAATGCTCTTAAAACGCAATTTCTGAAAGAGCCATCATCGATAAGCTAGCA  
ACTATCGCAAAACAAGAAGGTACAAGAACTTTCACGAGAAGCTCTTCTCCCATGCTAAAAGCTGCTCAAG  
GAAGTCTTCGCGATGCCGAGTCCGCTTTTATGATTACGTAGTAGGCTCTTTTCTGAATCTTTAGATCCAGA  
CAGCACAGCTAAAAGCTCTCGGTATCTTTTCCGAGGATAGCCTATATCAACTTGCAGAAGCCATTACTACC  
CAAAATTAACGAACAAGCGCTAACGCCGTTTCTCGATGCTATGCAAAATGGGGGTTGCTCCAGCCCATTTTCT  
TTCAAGATGTAACTTTGCTTTTCTCGTAGTTTCTCTTAAAGCAATATCTAAAACAAATTTCTGTAGC  
GACTAAAATACTCTCCGAAATTTCTATTAAGAAATACTCGATTTTCTTAGGAGAATCTGCACGGCATATTAAT  
CTCGCGTTATTTTGAAAAACTTTTCTAGAAAAGGGTATTATTCGTCTTCTACGAAATTTACTCTCGCCCTA  
CATTCTCTCAGCTTGTCTCACAGATACGACAACCTGCACCAACTCAAAATACGCCCTATCCCTACTGCCTC  
AGAACTAGAATCTTGCCACCAAAAATCAAAATCAAGCAATACTGAGGAAACAAAATCATCACCACAACCA  
ACAGCTGTAGCAAAACTCTCCCAAGGAAGCCTGTTAACCCTGCTCATCAAAAATAAGAAAGAACTA

TCCATCAGGAAACACCACCCCTTCTCTCGATAAGA**TTTC**CCCTTCTGAATCCGCAGCCATCGACACGCT  
GTTACAA**TTTG**CTGTTGTAGAAT**TTTC**TGGAGT**TTTA**ACTAAGGAGC**CAAA**ACATGGGTAGCGGTTACGC  
**TAAA**AGAAAAAGAAGC**CAAA**TTAATGGAACGCCAATTCATG**GAAA**TGGAGGCCCTCTCTGAACA**GAAA**  
CGTT**TTTC**TGGAGAGGCTG**GAAA**TGGCTTGGTATCTGTAACATCAACG**GAAA**ATGTGACCTGGTTGATG  
TTCGAAT**TAAA**CCAGATTGTCTAGATCCTGAAGATCCTGAAGTAGTGGCAGACTTATTCGCGCAGCA**TT**  
**TAAA**GCAGC**TAAA**GCAGC**TTTG**GATAGT**GAAA**TGTCCGCTATG**CAAA**TGGGAATGCCGTTCTAATTT**TTT**  
**CCGT**TACACATACAGGAGTTGATGAACCTCTTCGTATGT**TTTC**GCCCGCAATAACTGCTTCGT**TAAA**CGA  
GAGCACTCCCTTGAGTT**CAAA**TCTAATAATCGCAT**TTTC****CAAA**GAA**TTTA**ATTGCTGGGATGACAGCTGATA  
ACTCC**TTTA**CCCCTAGTCC**TAAA**AACATAGGCAGAAGAGCAGGATCTCCTGCCATCTCTCCACATACAGA  
TACGGGAACATTCTTCTG**TTTA**GCCTGCTCTACAACATGATGAATCATTCTAATAACAGAAGGATGCGGC  
ACTTACTCCGCTCTCCAAGTAAGGAACGCTCTCTAGAAGTGCC**TAAA**GTATACTGAGCAAGATCATTAG  
TACC**TAAA**GCTA**CAAA**AGAACTCTCTG**TAAA****TTTC**CTCTATCATC**CAAA**CTGCAGAAGGGATCTCTAT  
CATGCTTCCCCATAAGATAT**TTTC**ACTGATCCC**TTTC**CAATAGCCGAA**TTTC**TTCTT**GAAA**AGCCGC**TTT**  
**ACTAAA**GCA**TTTC**TGAAGCATCTATCACCACAGGAATCAATACC**TAA**AGTCGTCCTATTCTA**GAAA**CAA  
TAGCAATAGCCTGCAACTGCTCCTTCAACTT**TTTC**TTGTTCTAATAACCACCGTACTGACCGATGAGA  
AGAG**GAAA**TACAAGGACACTC**TTTA**TCCTCTC**CAAA**AT**CAAA**CAAA**CG**CAATACATGAATATCTGAACAC  
TG**GAAA**CTGAACTAATTGAGCATATTGATCAGCTTGTCTTCAACACAGGGTAAGCGTCC**CAAA**G**GAAA**AG  
CC**TAAA**TTCTGAACGGAAGAGCCCAACACTTGTTCCTGGAGACTCCC**TTTC**AATCATGGGCAATCTTTC  
TGTACTTACTATCTGTGCTGAGAGAGATAAGAGGCAGATT**TTTC**CCTGTCTGCACCTGCACTGGAACA  
GTGACA**GAAA**CAGACGCTTGCTTACGATAATAAG**TTTG**TATCGTACTTAGCTGAGGAT**TAAA**CGTAATCT  
CTCCCTTATCCCATTAATGAGAATAATGTCCAC**TAAA**ACTCGTTAATAGTATCCATAACTCTGTAGT  
**AAA**ATTGGCAACATAAGGAATATT**TTTAG**C**CAAA**GATACAATCGCGGTATGCGAAGTT**TTTG**CGCCCTCT  
**AAAG**ATA**CAAA**GCCCTGATGTACTCGGGATTAGCA**TTTG**CGGCTTCCGAGGGAGTAAGCTCTTCC**GAAA**  
AGACAATAAGATTCTGAT**CAAA**CTCCC**TAAA**GAACTCTTATGCTGACAA**CAAA**GATGGCCAATCACTCG  
ATTAG**GAAA**TATCATGGATATCCTGAACTCGATCTACTGTGGTAGCAGTCGTCTTCTGTACAGCACATAGA  
GAT**TTTC**CTATCTCTCCCATGACAGA**GAAAAA****CAAA**CTCCGCATTC**TTTC**GATCT**TTTC**TAATTGTT**TT**  
**TA**ACCACCTCTCCGTGAGAAGAGGGTCT**TTTA**TAA**TTTC**TAGATGTGCCTG**CAAA**ATGGAAGCTATCTC  
TTGATATCCCTGC**TTTC**CC**TTTG**CTTCTT**TTTCTAA**AGCAGCTAGATCTGAACGAGATCTCTT**CAA**GCC  
TTGTAGTAGCGACTGATCTCATGTTCCACTTCTTCTTGAGGAAGAGTTAGCTCTCGTATCCG**CAAA**GAAG  
**ATTTG**CCCAACA**TAA**AGC**TTTC**CCTAGCCCTATTCAGGGACTATAGGCTCCCTACAATA**CAAA**CTC  
CTGTTGCAACTCCTTATTATCTTGACCCGTAACGCTCATTACAACCTCTCCGAATCCAGAAT**TAAA**AACCT  
CGGAGAG**TTTC**TGCATTACTCGAGAAGCAGAGGGCCT**TTTA**TATGAACAGCAACCTCGCCATTATAAGA  
AGCTCCTAACATAAGAATACTCATGACGCTCCTAGCGTTCACGGT**TTTC**CC**TAAA**TAGGTCAGAGTCGCT  
TCGCATCTTCCCTTCGAAGAG**TTTA**ACAATAGTACCAGCCGACGCACGTGTATCCAGAAGGATTC  
GTATCG**TAAA**AACTGCTGAGAGTTCCCCTATCTCCATAAGAGGACTTCTACAGGCCATGAAGA**AACT**GA  
ATCATTCCCCCACTCATAGTATTCTTCCCTGTACGTG**TAAAA****CAAA**ATGATGATAAGC**TAAA**TCCAAT  
**CAAA**AAAATACGATA**TAA**ACCCTTAGAGCTTCT**TTTCAAA**GC**TAAA**GAGAA**GAAA**AGCGTACTTTTT**TT**  
**TCTAAA**ACTAGCCTTCTAAGGTT**TTTG**AGATA**TAAA**AGATACTGTTCCAGCCAGAG**TAAA**AACGTATGATAA  
TGACTATCAG**GAAA**GCA**TTTC**T**GAAA**TGGCAAT**TTTC**CCATGAG**GAAA**TAAGC**TTTG**ATTATC**TAAA**CGCA  
CGTTATACGAAG**GAAA**ATACTGACGAATCTTAGCATCGATGATA**TAAA**ACAACGACTGTCCGCTATATCGTA  
CTGAGCA**TAAA**ATG**GAAA**TATACC**CAAA**GAACTACAATTATCTT**CAAA**G**GAAA****TTTC**CCTCTACTTAAT  
AAGCTTCTCTAAGAAGATATTGCGCTTGAGC**CAAA**TAACGATAAG**GAAAA**ATACCAATCTCCCCTTCTC  
GAG**GAAA**ATCCATTATGGATAG**GAAA**AAAAATGACGATACGTCTCATCTCCTAACTTAG**GAAAA**CAACTCC  
TACAG**TTTCAAA**AGGAGGCGCGCC**TAAA**TATACTATTCC**TTTA**TA**ACT**TATACCA**TTTG**CACATCATAA  
GGAGCGGAT**TAAA**CTA**TTTC**GCGTTATCCGAACGTC**CAAA**TGGCT**CAAA**GAG**GAAA**AAAATGAC**CAAA**TACC  
AGG**GAAA**TCAGTATCTCAACACCCAATGCA**GAAA**AC**CAAA**AATCTC**GAAA**TAGCTCGATACGATCTGCT  
TGAGACAGACCTACCAACT**CAAA**CCATCCTCTGGGCAACCGTGGAAC**TTTAG****CAAA**CACTTCTTCC**CAAG**  
**AAA**GCGTTCTGCGCATCTGCTCGAGA**GAAA**GC**ACTT**CTACCGGTTG**TTT**AGAACAAGCTGATGTTACGCT  
ATC**TTTA**TACCACTGCATTCCTAACCTCATTACATCGCCTATCTGCCTTACGGATAAGGCTA**TTTA**GTTC  
CTGCTCTGTCTT**CAAA**AACAACATCCTAT**TTTC**ATTGGGAGCGCCTACTGGTTAGCAGGCATGCTTGCT  
CATCAAGCTCCTATCTGCTGCGCACTCTTGATTGTAGCGCTACATCCT**TTTA**TTCC**CAAA**CGCTG**TTTGA**  
**AA**ACGCTCT**TTTC**CCTGAGTAT**TTGT****TTTG**GAGTCCCTCTACTATCTCTCC**TTTA**ATATCTCCAT**CAAA**  
CGCATCAGCTCTGTTGCTAACTC**TAAA**ATACAAGTGA**CAAA**AGGATCTGCATCCGGATAT**TTTC**TTAAT

AAAAAAAACACTCACTCACCGCTATTCTGGAACAGCTCTTTCCTTAGAAACGGAAGATAAAACAATCCTATC  
AAAACCTCCCTTGCTCCATCATTTCTACTATTCCACTTAGTGAGCATAACCGTGTATCACTTAGAAGGCTG  
CGTATCTAAATCTTCATGCCCTATTACTTTTCGCTCATCAAAACTTATAAAATACACCCACGCAATCCTCT  
ATTTTTCGTAGAAAFTCTTCGAACTATTCTCTTCTATTCTCAAAGAAAATTTCCGATTCTTTCTTCATC  
AGAGGATCCTCAACCTATTTTCAGACAAAGATATTGGTCGATTCTCATCCAGTTTAATCCTTGGCACTCC  
CCTCTCTTACAAAATATAAGAGCTATTCAAAAGCAAAAGGATTGTCCCATCTTTTTTCGTATCAGGATGG  
CATTTCTCACTATTTGCCAATACCTTCTTCTTTTATTAGGAACGC TTTC CCCCAA AAAAACGAGGTCTCT  
GGGTCTCTTTCTACTCTCTCTTCTCAA TTTCGTATTCCCAACCTCTCCCTCTGTATTTAGGACCTGGTT  
CTCTAGTATTCTATTCTGCCTGGCTCCTTTTTCATAGGACACTGCTCTAGCCTGAATCGACTAGGTATT  
AGT TTTATTTTTTGCTCGCTCTTTTTCCTATATCATCCCCAGCGTAATACTCAGTTT TTTAGCGACTT  
TAGGCATTTTATT TTTCTTTGTACCGCTATTACG TTTC TTTA CTCTCCCTGGGAATCATTATTCGGCAC  
TCGTTGGTTTTCTCTCCCTCTTCGG TTTGTATTACAACCTATCAATCTCTCTTGCTGCCAGCTTTT  
ATCGT TTTCCCAATGATTCTGAATGTTCAAATTTCTCC TTTAGATGGACTTATCTATAACCTGTTCTACC  
CTACACTCGTTATGCCCATCTTCCCTTATGATTCCCTTATCATTCC TTAATCCTCTCCTATCACACCTCTC  
TGAATCCTACATCTCCTGGATCCTTGATCTTCCCTTGGCTACATGCTC CAAACGTCCTTATCTCGCTTACA  
TCAGCTCCCCGAC TTTAGAGTGGATAACACTTGTCTCTATTATTCTTGTTTACATAGGGGCTCTATCCT  
CTGTGCGGAAGGCTGTAAATACAGCTGTAGATCACTCGATTATTCTC TAAATCTGTTC TAAAAAAAAGCG  
CTCCTGT TTTATCACTAGGAGCGCTTTTGTGTAAG TGTCACTTGTATAGTCTAAACTCTGCCAGTAGT  
TTTTGCTCTTGGAAAGATTT TTTCTTTTGTAGGTAGCACCTCAT TTTC CAATACCTTAGAGTAAGGAACAG  
GAGCATGCAACGCTCCTATCCGCTTGATAGGAGCGTCAAGATATCTGTAAGCTCTCTCTGCTAC CAAAGC  
AACCAGTTCACTAC CAAACCCACAAA ACTCTGAAGCTTCATGAACAAC TAATAACTTCCCTGTTTTTTTA  
ACTGACTCACATACAGTAG CAAAATCACAAGGAACAATCGTTTC CAAATCAATAACTTCAACAGAAA TCC  
CTAATTCTAATAGATCTCTGGCCACCTCTACGCTCATTACTAGAGACATTCCCAAGAAA CAATAGTTAA  
GTCTGTACCTGGATGCACAATACGTGCTTGTCC GAAAGGAAGAACAATAATCAGAA GAAAATACAGGCGTC  
GTACTAAATAAACCGCGTTGATACAAAGCTTTTATGCTC TAAAAATACCACCGGATTAGGATCTCGAATAG  
CAGCTTTTTAATAAAGCTTTTAGCATCCGCAGCATTGGAAGGATAGACCACCTTTAATCCAGGACAATGAGC  
AAGAAAAGCTTCTATATTCTGGGAATGATATGGTCCGCCTTGAATATACCCTCCGCAAGGAGTCTTATT  
ACAATGGGCATTTCCATTCTCCGGCAGAGCGATAGTAGATACTCGCTGCTTCAGAAAACAGCTGTTTGA  
TACCTGGC CAAATATAGTCTGC CAAATGAACTCTCTGCAACCGCTTATAGAAA CCAAT CAAAAGCCATTCC  
TACAGCAGCTCCGATAATAGTGGCCTCTGC TAAAGGCGTATTAAAACATCGGT TTTCTCCGAATTGCTCT  
GTCAGAGTCTTGTAAACGCC GAAAACGCCTCCCTTATTTTCCTGCGACATCCTCAC CAAAACAAC TACTC  
CAGGATCTCTCTGCATCTCTTCAAC TAAAGCCTCTGTGATAGCGTCACGCATAACTCTAGGCTCTAA TTT  
CTGTAAGGAGGCAG TTTCTAATGCAT TTTTCATAATCTATTAAAG GAAATATTGTAGGGAG CAAATACTTCG  
TG TTTGTTGCTCC TTTGCAAGG GAAAGGAGCAGACTCAGCAAGCTCACAAGCCTGATTAACAG TTTCTT  
GAAGCTCAGCC TTTATTTGCTCAATCACCTCATGCGCAACCC CAAATCATCAAGCAGAGACT TTTCTAA  
ACGCACCAGAGGATCTTGGCCTTGGCAACACGATAAA TCTTCTCTGAACGATACTTGGCCTGATTATCT  
GAATTACTATGAGACTCTAACGAACGACATTGACAATAACAAGAGCCGGAATATGTCGGTGTCTTGCAT  
CAGAAA CAGCCCGCT CAAAAGTCTGTGTCAACACAGATAACATCTCCACCGTCAACCTCATAAGTAGCCAG  
GCCTGAATAACTATTACC TAAAGCTACCAGATCTGCGCCACATTGGTCAG CAAAAGGAACG GAAATGGCC  
CACTGATTAT TTTGTATGGCTATCACTAGAGGGAGTTGATGCAGAGATG CAAAATTCAGCATCTCGTGGA  
ACTCTCCTTGAGAAGTAGATCCATCACCGCCGATACATATACAACTTCACTCTTCCCAGAATCTTTAAC  
ACCCAGGCACGCCCCGAGCCTG CAAAAACTGTGTACCAACAACACTAGACTGACAGCATATACGAAGC  
TT TTTATGGGAATAATGGTAAGGCATCATTCTACCAGCAGAATGATTCTGTGTAGTCCGAGC CAAA AAAG  
AAGCGAAGAT TTTCA GAAAGATCGCATCCCAATCC TAAAGGGAATCCTTGATCCCGGTAATAAG GAAATGC  
CCAGTCC TTTCCCGGAATCAAGCTTT TTTGCAGCCACAACACCTGCAAGCTCATGACCAGCGCAAGATAAT  
TGAAAAGAGCCACCGGAACCACTCTGGCGAGATAACAACAACATCTTCCGCTCTGAGAATCT CAAA GTCC  
ATGCCAACCTGAATACATTCTCAACAGCAGAGTCTAATTGGTATACGGAGTGTCTCACAGCAGCTCCCTC  
TCAGCTAAAAGATCCTTCT TTTCTATACAG CAAA GTCAGAAA AAAAACC TTTGAT TTTGTCTAA GAAACT  
CCG TTTCTTAGG GAAAT TTTCA GCCTTCTCCGTAGCAG CAAA CTGTCTCAATAAAA TCTTTTGTTCATTA  
GATAGGTGCTGGGGAGTCTCCACAGATACTCTTAC TAAAGATCTCCTCTGGAT TTTCCCATGCACATTGG  
GGAATCCCTGCCCTCTAAC TTTAAGA ACTGTTCCGCTCTGAATCCCTTCTGGGATACT CAAA CGGCAAGT  
ACCTTCC TTTAAGAGTGTGGGGAT TTTCTTCTTGATCCC TAAAGCCGCATCAA CAAATCCAATAGGAAGC  
TC TAAAC TAAATCATCCCCATGGCGCTC GAAAACAGGATGAGGCTCTACATCAA TAAA AACATACAGAT

CCCCTGCAGGCGCTCCATTTTG GCCAGCATCTCCATAGCCTTCCATCTTTAATCTCATCCCAGAATCGAC  
TCCAGCTGGGATATTAACATGGACGCTACGTTTA TCCTTGATACGTCCCTGCCACGA CAAA CTGAACAA  
GGATCTGTGATAACCCGACCTTACCACACTACAATCAGGGCAAGTAGAAGCCATGGA GAAAAAGCCTCGAC  
TTTG CACTACCTGACCAGAGCCCTTGCATCGATCA CAAACTTTTACACC TTTA GCAGTATTGGCTCCACT  
ACCAGAACAAGCATCACAAGA TTTA TAGCCT GAAA CAAGAAGTCTTT TTTCAACACCT TTTG CCGCCTCC  
TCGAAGGACAGCGTAATATGCACCTTCTTACTAGCTCCTTGTCGAGAAC TTTCTGAGCCTCCACGCATTC  
C GAAA GCTTCTCCAAGTCCTC CAAA AAGCCCTT CAAAGAAA CCGCCTCCATTACCACC GAAA TCGCCGC  
AAAAGCTCCCATAAA TGTTTCG CAAA GCGTCTTCCATATTCCCCATGCCAGCACCGCCGAATCCTCCAGCA  
CCAG CAAA TGGACCGTC TTTG CCGTAACGATCATATGACTCTCGCTTCTGCGCATCACCTAATACTTCAT  
AGGCTTCA GAAA CTTC TTTAAA GCGTGCCTCCGCTTTCAGCATCCCAGGATTCTTATCTGGATGGTACTT  
TA CAGCGAGCTTACGGTAAGC TTTCTTTATTTTTC TTCAGGAGTAGCAGTCTTCGCTACACCCAATATCGTG  
TAGTAATCCATGAC GAAA CACCACCTAA CAAA GATTT TTTCTAACGACCACGATA TTTGGCTGCCGCCTTG  
GAT TTTG CTCGTTTT TTTACAGAAGG TTTG TCGTAGAATCTATGAGACTTAGAAGT TTTCAAAAATTCCTT  
C TTTG TCGATTTTT TTTCTTTAAA ATTCTTAGAGCTCGATCTATAGGCTCTCCAACCTGACT TTTAACACT  
GGGCATGAATAACCTTAATACGTAATTGGTT TTTATTTAATAACGCGCGCCTAGCTCGAACGCACAAGAG  
ACCGGGGATTGTAACACCACT TTTATTTAGGCTTCAAGAGATACTTAGGTTGTATAACCTTCT TTTGAATT  
ATAAAAATTGCAAAA TAAG TAAACAAA ACTCTT GAAA AGTTGTTGTCC CAAAAG GAAAACACTC TAAAA  
AAGGAAGAGATGCTCCGGTAATC TAAA CACAACGGAAGAT TTTGAGACAGAA CAAA CTGC GAAA CAACGT  
ACTTACGGATTTCGATCGATACAAGGAACCACCTTCC T TACC GAAA TACGCGAA GAAA ATAGTTCTAC GAA  
ATACGTTGGATCCGGAGAGATCACATGACAACATCCCTTATCTAAA CAATACTCTAGAGCTTCAGAATAA  
GACAA TAAA ATTCCCGGAGTAGAAGTAGTATCTGTAAGCAGAAA ACCATCAAG GAAAGCTCTGAG TTTA  
AAGCTACAACCCACCCTT TTTCC TAGAGG CAAAAG CAAAGCCCTCTCTTCTTGACC CAAAGAAA GATA  
TCCTTC TAAAGAGCTATAGCCAAC TAAAGGGACATT TTTAGCCAGAGAGAGCCCTTGAG CAAAAGCAACT  
CCCCTCTAGTTGCA GAAA ATCCCCGGGACCAACAGAGACTCCAATACCTTG GAAAGG CAAATCCAGGC  
TGTT GAAA ATGAAATTTAACACAACCTCCTTGATCTGGCCCTGTAGG CAAAGACCATACTTC TAAA ACATC  
TCGACAATCGACATAGGC CAAA AACGGCTGAGAACC GGAAGTGTCTACAATAAAAATA TTTGTACACAGCC  
TAAA CTCTAGATTGAT TTTAGACAAA GGATTATAACCGT TAAA ACCGT TTTAATT CAAA AATTAATTCGC  
TGTCGC CAAAT CAAA ACCGACT TTTAC TAAAAAACTCA TTTATAATTTCGATAAAA TAACAGTT TTTCTATT  
CAACTTCTCT TTTGCTGCAATTGATAAAA AACCTGTCTATACT TTTCTCGTGTTAGATGC ACTAATTGTTGCG  
AT TTTG TAGTATATCGGTAAGAAGAAGTAATAT TAAA CATGTGCACACAACCCCTTGCTCTTCCAAGGAT T  
TTGAACTAGTTGCCAAGGACAATTGTGAACCTCGACGAATAATACAGACTCT CAAA ATCTAGATC CAAAT  
GCTTCAGAGGTC GAAA AACTTCTCGACGAATCCGCAGAGGCAGAAGA GAAAGTAGATGATCATACGCCCC  
CTTCAGAACTTT TTA TTTCTCCC TTTGAATAAGCGTCCTTTTTTTTCCCTGGCATGGCAGCCCCCTCTCCTTAT  
AGAGGCAGGCCCCCATTTATGAAGTACTTACACTATTAG CAAA ATCATCCAGAAA CACATCGGTCTTGTC  
TTAA CAAA AAAAGAAGATGCCAACACTC TAAA AGTTGGT TTTA ATCAGCTTCATCGAGTGGGCGTATCCG  
CGCGCAT TTTACGCATAATGCCTATTGAAGGCGGTAGCGCTCAAGTGTATTGAGTATAGAAGACCGTAT  
TCGCATCGTTAAGCCAATTCAAGATAAGTATC TAAA AGC CAAA GTCTCCTATCA CAAAGAGAA CAAA GAG  
CTGACTGAAGAGC TAAA AGCTTACTCAATTAGCATCGTATCGATTAT CAAA GATCTTC TAAA AC TAAA CC  
CTCTGTT CAAA GAAGAGCTACAAA TTTTCTTGGCCACTCTGA TTTCTACTGAGCCAGG GAAA CTGCAGA  
TTTCTCCGTTGC TTTA ACTACAGCAACACGAGAGGAACTTCAG GAAAT TTTAGAAA CCACAGACATGCAT  
GATCGCATAGA CAAA GCATTGGTCTTACT CAAA AAAGAGTTAGATCTAAGCCGTCTG CAAA GTAGTATCA  
AT CAAA AAATTGAAGCGACCATCA CAAA AAGTCA GAAAGAATT TTTCT TAAA AGAACAACT TAAA ACAAT  
AAAGAAA GAGTTAGGGCTAGAGAAA GACGATCACGCTGTTGATCTTGAGAAG TTTA TGAACGCTTCAAT  
AAA CGAGACGTTCTCAATACGCCATGGACGTTATCCAAGAT GAAA TGGA TAAA TTA CAAA CCTTGAGA  
CTTCTTCAGCTGAATATGCAGTCTGCCGCAACTATCTCGATTGGTTAACTATTGTACCTTGGGGCATCCA  
AACCAAGGAATACCACGA TTTGAA GAAA GCAGAATCTATCT TAAA TAAA GACCATTACGGTTTA GAAGAT  
ATAAAAACAACGCATCTTGAATTGATTAGTGTAGG CAAACTAG CAAA CGGTATGAAGGGAAGTATTA TTT  
GCCTAGTGGGGCCTCCAGGAGTAGG GAAA ACAAGTATCGGCCGAAGTATTG CAAA AGTGTTACACCGTAA  
ATTCTTCCGGTTCTCTGTAGGAGGAATGCGTGATGAAGCA GAAA T CAAA GGACATAGACGGACCTATATC  
GGAGCTATGCCAGG GAAA CTGTGTGCAAGC TTTGAAACAAA GTGAGATTATGAATCCTGTGATCATGATTG  
ATGAAGTCGATAAAA ATTGGCTCTAGTTATCACGGAGATCCAGCTTCGGCCCTTCTTGAGGTGTTAGATCC  
CGAA CAAA CAAA GACTTT TTTA GATCATTATTTG GATGTCCGCGTAGA TTTA TCTAACGTGCTCTTCATT  
CTAACCGCAAA CGTATTAGATTCCATCCAGACCCTCTACTGGACCGAATGGAAGTGTGCG TTTA TCTG



GTTACATTCTGGAA GAAA AATTACAGATAGCCAC TAAA TACCTCGTACCTCGCGCAAG GAAA GAGATGGG  
AC TTTC TGCACAGAATGTGAC TTTC CAACCAGAAGCTATCAAGCACATGATCAACAACCTATGCTAGAGAA  
GCTGGAGTTCGTACACTGAAT GAAA ACATTAAGAAA GTCTTAC GAAA AGTAGCTCT TAAA ATTGTT CAAA  
ACCAAGA GAAA AATCCTTCCAAGAAGTCGCGG TTTC CAATCACGC CAAA AATCTACAAGATTATCTTGG  
CAAA CCAGTCT TTTC TAGCGATCG TTTC TAT GAAA AGACTCCGGTAGGAGTTGCCACAGGCCTAGCATGG  
ACTTCCTTAGGAGGAGCAACCTTGTACATA GAAA GTGTTCAAGTCCCTTCTTCATCAGG TAAA GCGGATA  
TGCATCTAACAGGTCAAGCTGGGGATGTGAT GAAA GAGTCTTCA CAAA TAGCTTGGACCTATCTTCATAG  
TGCTCTAGAAGTTATGCTCCAGGACAACCATTCT TTGAAA AATCGCAAGTCCATATCCATATCCCAGAG  
GGAGCCACTC CAAA AGACGGTCCCTCTGCAGGAATTACTATGGTAACGTCCCTTGC TTTC TTTA CT TTTC GG  
ATGTTCTGTGCTTAATAACCTCGGCATGACTGGAGAGCTCACCTAACAGGCAGAGT TTTA AGGAATTGG  
AGGTATCCGG GAAA AACTTATCGCAGCAAGAAGATC GAAA ATTGAATAT TTTA ATCTTCCCTGAAGATAAC  
CGTCGAGATTACGACGAGCTCCCCGCATACCTTAA GAAA GGTCTCAAGGTACACTTCGTCACCCATTATG  
ACGATGTATTCAAGATTGC TTTC CCTGGGG TTTAAA TCGTGTCTCTGAGCTGTAAGGCTCAGAGAACCT  
TCTCTCTTATTCTCAA CAAAT CAAA G TTTAGTATAATCCGCTTCGAGACAATCCAGGAGGCTATTATGC  
AACTTCCGTCTATTATTAGTCT TTTC TTCTTCCC TAAA GCTCCCCATCTCCACT TAAA AAAACCTA TTTA  
TCAA CAAA CTGAACGCATCATCAATATAGCTTATCTTGTTCTGTTATCCCTATCTGTTGTAGGAATTATC  
TCTGGAGTATTCC TTTC CCTTAGCTTCCCCCTATTAGGCGCAGGCA TTTG TTTA ATCTCT TTTA GCCGTAG  
GTTCTGCTACTTGT TTTG TTTC CATTGCTCCCGGATATT GAAA AAATAAATTGCTCTAAGAGAACCCAA  
GGTCTCGATTACAAC TAGCTCCCCATTACCAACATTAATGCGCTCCTT CAAA TCGATTGGCCTTG GAAA  
GCAGCTCATTAGCTATCTGATAAAA AGGAGATC TTTC GTACAAGCTCTCCTTCTTGT GAAA GCTTCTTATC  
CTCTCTTA TTTATAAAA ACTTTTTA ACTAGAAA CTCTACCTGTTATCACCGACGAGCTTCT TTTC ACTCA  
TAACGAGCTTTTTCT TGTG TTTAGGCTTAGTGGAAGTTATAAATT TTTC TCT GAAA CTGTGGAGAGACATA  
AGAAA TTAT TTTC ATTCTCGTCTTA TTTATATC TTTG CACATCCCTACATTCCAAA ACCTCTTACCTTGC  
AAGCAAGAGGAAGTCGCTTGTAGGGCATAAA TGAT TTTA CCTTGAGAGATCTCTTCCCT TAAA GAGGATA  
TTGAATGAGTTATCGTGGATTAAC TATTCTAGGCTGTTCAAGTCAACAACCGACTCGTCACCGTAATCAC  
GGAGCATATCTACTCGTTGGAATGGGGAAGGGCT TTTATTTG ACCCAGGAGAAGGAACCTCAACGTCAAT  
TCA TTTACGCTAATATGCCCCACGGTAG TTTC TCGTATTTTC ATTAGTCAT TTTC ATGGAGACCATTG  
CTTAGG TTTAGGTTCCATGCTCATGCGCTTAATCTAGATAGAG TTTC ACATCCTATACACTGCTATTAC  
CCTGCTTCAGG GAAA AAATA TTTC GATAGACTTCGCTATAGCACTATCTATCAC GAAA CAAT TAAA GTTA  
TAGAGCATCCTATCGATCGTGAAGGTATCGTAGAAGAT TTTG GTAAT TTTC GAATAGAATCTCGCCAAC  
AGACCATCTTGTGACACCCTAGGGTGGCGCATTACAGAGCCTGATACAACAAA TTTATCCCT GAAAAA  
ATTAAA GCAGCAGGCTT GAAA GGGCCCTATCATGCAAGAGCTCATCAATAAGGGCCGGTAAA GGTAAATG  
ACACTATCGTCCA TTTG GACGATGTCAGCTATAACGG TAAA GGAGACAGCATTGCTGTTGTTGCGGATTC  
CCTTCTTGCCAAGCTATTGTGACTTAGCAA GAAA TGCTCGTATCTTATTATGC GAAA GTACCTA TTTG  
GAAGAACATTTCCATCTCGC TAAA AGTCATTATCACATGACTGC CAAA CAAGCTGCGGAACAAG CAAAGC  
GCGCAGAAGTGCAACAAC TAATTCTCACACATT TTTC TGCACGCTACAATACGACAGAAGAA TTTG TCCA  
AGAGGCTGGA GAAA TT TTTC CCAATGTA TTTG CTGCAGAGGAATTCTGTAGCTACGAGTTCCC TAAA AAC  
CCTAGTTAGCGCATATACTGTTG GAAA CAACCC GAAA GCTTCTTAGCTCATAAGTACAGCAGG TTTG GGA  
ATGATTACATCCT TTTA TGCATT TTTA GATTACC TAAAAA ACAT GAAA GCCTCCTCCCTTCATACATTAA  
GAAA TTACTGTATGGATCTCAGCTCTC TAAA ATGTTT TTTAGAAA AAAAAAGCGATCTATCTCCAACCTCC  
CCCCCTCTCTCCACGACAATACTACGACTATCTCCTCTCTCT TTTC TCTCTG TTTAC CAAA GACAAC  
ATCCGTC TTTATCTTCTAGAA CAAA TC CAAA CGCATCATT CAAA GCGCACCGTACGCCGTCGACTATCTG  
CTAT TAAA AGT TTTG CTAGAT TTTG CG TAAAAA ACCAGTTAATACCAGAGAATCCAGCG GAAA TGATTG  
AGGGCTCGCCTTCCCCAAGA ACTTCCCTCCCACTCACCTACGAACAAGTCCCTGCCCCTAATGGCTGCT  
CCAGAATTAGAT TAAA GTTACAGGATTCCGAGATCGCTG TTTA CTGAACTCTTCTATAGTTT CAGGTCTAA  
GAATCAGCGAGATTACCGCTCTGAATCGTGTGATATCGATTTC CAATCACACCT TTTACATATCCGAGG  
GAAA GG GAAAAA GAACGAATCGTTCCATGACAAA GGTAGCCGTCAGTGGTTACAAGACTA TTTAAA C  
CACCCAGATAGAGCTCTGTAGAACAGGATCATCAAGCTTGT TTTAAA TCGA TTTGGAAA ACGTCTAT  
CTACTCGCTCTATAGATA GAAA ATTTCCAACAATATCTCCT TAAA ACAGGATTATCCGGATCTATTACTCC  
TCACACAATCCGTCATACTATTGCCACTCACTGGTTAGAGCGCGGGATGGA TTTAAA AACCAATTCAACTC  
CTGTTAGGCCATACTTCTCTTGGAGACGACAACCA TTTA TACTCATG TTTC CAT GAAA TAAAAA ACAGA  
TCCACGAT GAAA CTCACCCTCACAAC TTAGAGGAGTA ACTACACCGG CAAA CTCTTGTACTCTAAGAAG  
GTC TTTG TTATCCT TTTG TCCATGAGTATTGTTCTTGA TAAA ATCGG TAAA ACATTAGGGACACGAGTCT

TATTCGACGATGTGCTGTCGTATTCAACCCAGGGAATCGTTACGGCTTAACAGGCCCTAATGGAGCTGG  
GAAA TCCACTCTAT TAAA AATTATTACAGGCTTGGTAGAACCTTCTCGAGGAACTA TTTT CTTGCCCAAG  
AAGATTGGTAT TTTG CGT CAAA ATATCGATAGCTTCGGTGACGTGATCGT TTTA GATTGTGTGATCATGG  
GAAA CTCTCGCTTATGGGAGGCTATGCAACGTGAGATGCCTTATACGCGGAAGAA TTTA CCGATGCTAT  
AGGAATGGAAC TCGGT GAAA ATTGAAGAGATCATCGGCGAAGAAGATGGTTATCGTGCAGAGTCTGAAGCT  
GAAGAGTTGCTTCTAGGTATTGGCATTCCAGAAGAATT TTTT CTCTCA GAAA ATGGCTACTATTCC TTTAG  
ACTTACAATTCCGCGTCCCTCCTATGCCAGGCTCTG TTTGGCCATCCTGAAGC TTTG CT TTTA GATGAACC  
GACTAACCACTTAGACTTACATTCTATCAATTGGTTAGGTAGT TTTT TAAA GACTATAACGGCAGCGTT  
ATTGTAGTTAGCCACGACCGCCA TTTT TAAA TACCATCACAACACATATCGCTGATATCGATTACGATA  
CTATCATTATCTATCCAGGCAACTATGATGCCATGGTT GAAA T GAAA ACAGCCTCTAGAGAGCAAGA GAA  
AGCTGACAT CAAA T CAAA AGA GAAA AAAATTGCGCAGTTGCGAGAG TTTG TAGC CAAATTTG GTGCCGGA  
TCGCGGGCAAGTCAAGTGAATCCCGTCTGAGA GAAA TTAAGAAGCTGCAACCTCAAGAGC TAAAAAAAT  
CTAATATT CAAA GACCTTATATCCG TTTT CCTGTGTCAGATAAAA ACATCTG GAAA AGTAGTCT TTTT TAT  
AGAAGGTATTAG CAAA ACATATGATGCAGATCC TTTG TTGTTCAACCCCTTCTC TTTAGAGAT TTTATCAA  
GGGGA TAAA ATTGGCGTGATTG GAAA CAATGGGTTGGG GAAA ACAAC TTTA ATGAAGTTGTTGGCAGGAG  
TAGAACAACTTCCCAAGGTCAAGTCAAGTTGGGGCATAATGTAGCCT TTTT CATA TTTCCCT CAAA ACCA  
CGCTGATATCCTGAAGGATTGTGGCGAA GAAA CACTATTGCAATGGTTACGCAGACG TAAAAACAGGGATT  
ACAGATCAAGAGGTTGCAAGCGTTCTTGG GAAA ATGCTC TTTG GAGGAGATGACGCC TTT CAAA CAAGT TA  
AAGC TTTG TCCGGAGGA GAAA CGGCTCGGTTACTAATGGCCGGAATGATGCTAGAGAATCACAATATGCT  
CATCTTGATGAAGCGAACCAACTTAGATCTTGAGTCTG TTTT CGT TTTA GCTTGGGCCATTAATGAC  
TACCAGGGACAGCTATT TTTG TTTT CCGATGACAGAACACTAATAGATGAGTGCAGC TAAA CTGCTGA  
TC TTTG ACAAGGGA ACTA TTTT CTT TTTT CGATGGCCGATGTCCGAGT TTTA GCTAGCCAGAAAAATA  
AATCGCTCATTGTAAGCAGGAAA TAATTGGAGTCACGTGGAAGCTCGGTTAGT TTTA GGATCTTCGTCAG  
AAAGAA GAAA AGCTGT TTTA GAGAGC TTTT GTATTCCC TTTATTTG TGTATCTCCAGAT TTTG ACGAACG  
CAGTATTG TTTA TTTCTGGAGATCC TTTT CAAGTATA CAAAGGAACTAGCTTGGAA CAAAGCTAACGTTGTG  
CGCTCTCAAGGGT TTTT CAGATGC TTTA ATTATCACTGCCGATACCGTTGTTG TTTA TAAAGGAGAGGT TT  
TCAA TAAA CCTGAATCTGAAGAACATGCTGTGGAGATGTTGCGTACTCTTAGCGCTCTTCTCACTCCGT  
CATCACTACGCTTGTCTTATG CAAA AT GAAA AAGTGTGTCGGCATCAGAAA ATACTCAAGTCTC TTTT  
ATTGACATCCCCCGCAGCATCT TAAA ACCTATGTCCGATCTT TTTT CTCTCTGAAGCGATGCGGAGGAT  
ACTGCGTACAAGATGGTGGTGGGTTAATCAT CAAA CAAATAGAAGGTTGTGTATATAATATAAAGGATT  
GCCTA TAAA AGCCTGAACCAGTTGCTCATGGAG TTTA ACATCAGCTTATGGGACTATCTCGCTAGCCT  
TCATTGG TTTT CTCTCT TTTA CACTCTCAGCCAGCTGTGAT TTTT CTTCCTCAG TTTT CAGAGAATCTT  
GT TTTT TTGC CAAA AATCAGTCCCTCAAGCTCTAGAAGCCTATCTCGAAGCTTCAGTAACCTATCAACAA  
CACGAT TTTT TCCGTATTACGCGTAATAGCAGAATCGTA TTTA CAA CAAAGC TTTT CTCTGAGGACACCC  
ACATACG TAAA AGTGCAATTATTGGAGCAGGGCTATCTGGTTCATCAGAAGC TTTA GAGTTACTGTCTGA  
GGCTATA GAAA CCGCAAGATCTCTATGAGCAACTACTCAT TTTAAA TGCTGCAACCAGCCAATTAAG CAAA  
ACTTCTGA CAAA CT TTTA ATTCAAGGGATTAACAGCTTCTCATCTGTCATCCGCTTAGAAGCTGCTTATC  
GTCTGCTGTAT GAAA AATAGCAAGGTAAGTGATTACC TTTA TTCT TTTA TCTACAAGTTACCAGAAGA  
AATT CAAA ACCTAGCGGCAACTAT TTTT TTACAAC TCA GAAA CAGAAGAAGCTGATGCTTATATTCATCGT  
TTG CTCTCTTCCCAATAACCTGACA GAAA ACTATGTTGCCTA TTTA ATTGGAGAGT CAAA CAAA AAA  
GAT TTTT TTCCAACACTACGCTC TTTA CTTACAAGTGCCTCTCC TTTA GATCAAGAAGGCGC TTTG TATGC  
GTTAGG CAAA CTGGAAGACTCTGGTAGCTATCCTAGAAT TAAA GCTCTAAGCTCTAGATCCAATCCTGAA  
GTAGTACTCGCTGCAGCTCAGACATTATTATTCTTAGA GAAA GAAGAAGAAGCTCTACCGATCCTAACCA  
ACC TTTG CCAA CAAA AACTTCTTCGAGCCCTGTATACCGCACG TTTT CTCTCGCAAGAGAAGGGTGAAGA  
GCTTCTTCTCCAATCT TTTA TAAACGCAACACAAGAA GAAA TTAGACTGAATACTGC TTTA GCACTTGT  
CATCAAGGGTGTACAGATCCTCAAGTCCCTCACTATCTAACAGAAA TCTTA GAAA GTAAA GTTCTCCATC  
GCATATT TTTA CCTACTCACTCGACAG GAAA AGCTATACAGTTCTG GAAA GAATGCACCACT TTTT CTCT  
CATGAGCCAAGAAGA CAAA ATGAGAACGTTGGCTATGTATCGGGTAGCGGAAGATACCATCCTCTCAGCG  
TTAC TAAA ATTACCAATGACGCTATCTTCCCTTACCTAGAGCGCATCCTCGCCTCA CAAA AAACTATAC  
TAGCAGC TAAA GCTATTGCTTT TTTA TCGGTAACAGCTCATCCTCAGGCAC TTTT TTTA GTCTC GAAA GC  
TGCATTAACCTGGAGACCCTATCATTGCGCTTACGCTAATCTAGC TTTA TATACAATGAC CAAA GAT  
CCTGAG GAAA AAAAGCTGTGCTATAACCGATATGCTGAACAATTAATAGAGGATACCAT TTTA ATTACAGATG  
CT GAAA ATCCGCTTCCCTCTCCAAGCTCTTCTTA TTTA CGCTACCAAGTATCCCTGAGACCCGCACACA

ACTTATGCTAGCTATTTTGGAAACCTTAGTTTC TTC CAAAACGGATGAAGATATCCGCGTTTTC TTTTC  
CTAATGAAAAAACCCATTACAAA AATATCCCGATCTTATCAGGATTGTTAATGAGAATAGTGGAGTGAT  
CTGGAGTGAAACGATT TTTCCACTT TTTATTGGAGTGCTGCTCGGCACAC TTTGCCGTCAGAAGGTC T  
TTC TCATCAACAAGCTGTT CAAA AAAAAA TTTCTTATCTGAGCCAT TTTAAAAGGCATTACAGGAATTATG  
GATGTTGAGGATGGGGTATTACATATCCATGATGATCTACGTCTTCAAGCCAA TAAA GCCTATGTTGAAA  
ATCGCACGGATTGTGGGAT CAAA ATCGTTGCTCATGGCAACGTTATGGTCAATTATCGCGG GAAA ATTT  
AATCTGTGATTATCTTGAGTACTATGAAGACACAGATTCTTG TTTA CTCACCAATGGCCGCTGTTCTGTTA  
TACCCATGGTTCATTGGAGGATCCACTATAACGATCTCACCATCTTCTATTATCATTCA TAAA GGGTATA  
TCTCGACTTCTGAAGGTCCTCA GAAA CATATTTGTTTA TCCGGAGATTA TTTAAA ATACTCTTCAGACAG  
CGTATTATCTATGGGACCCTCACGTC TTTCTATCTGTAATACGCCTGTGTTATTGCTTCCCT CAAA TCTCC  
ATTATGCCTATGGAGATTCCTAAGCCTCCGATTACT TTTTCGAGGTGGGAGTGGAGGA TTTCTGGGATCCT  
ATTTAGGTGTTAGTTATTCCCTATATC TAAA AAGCATTGTTCTACGAC TTTG TTTCTGGATAGTTTTT  
TAAA CATGGAATAGGTCTCGGCTATAACATGCGCT TTTCTCTCAG GAAA ATCCAAGCAATGCCA TAAAT  
AT TAAA AGCTATTACGCACATCGATTAGCTATTGATTTCATCAGGAG CAAA AGATCGCTATCGATTACATG  
GAGACTTCACTT TTTCCAAAGAACGAGCCCATCTTGCTGGTGAATTCCA TTTA AGTGATAGCTGG GAAAC  
AGTTGCGGATATCTTCC CAAATAACTTCTC TTTAAA AAATACAGGCCCTACAGAAGTTAGCCTATCATGG  
CGCGATAACAA TTTATTGGGAAA ATGACTTCCCTGT CAAA GTCAACTCC TTTCAAATGT TAAA CAAG  
AATTGCCTCAAGCAATTCTTCATCACCGACCAGTACGTATCAGGCGCTCTCGCAT TTTCTAGAGAATCG  
CTTAGAAGCTGGTTTT TTTGGAT TTTCA TTTTC AGTAGTAATATTCCAGGCTCTAAC TTTCTCATCATGGAGG  
TTCTCATCCGCTCA CAAA GTCTACTGTGGGCTTGTCTTCTTCTATAGGAACGTTAACCCCTTCGCTATCTG  
GAACTGCTATCTACTATACCCGCATGCTCTCCC CAAA TGCAGCCCATTTGTCAATTATCTGGATCGCTATC  
TTTTGATTATCGCGTTGC TTTACAAA AAGAATATCGGCATGCAAGACATATTGTAGAGCCTTT TTTGCTCC  
TTTTTAAA AACCACTCGTCTGTATTATCCTCTGATGAGCCTCATAT TTTCTCGAT TAAAGATGCTTTTC  
ACTCTATCAACCTTCTACATGTAGGATTGGAGT CAAA AGTCT TAAACAAA CATTCCTCTTTTC CACTCC  
TTCGCATCT GAAA CTATGGACGACCTATATCTTTGATGAACCTCACGCTAAGGACAC TTTCCCTAAA ACT  
GCTTGTGGTCTCTCTTCTCTTACACTC CAAA ATAC TTTATCCTTAGATGCGGAATGGATTTTGAAAA  
AAAGCCGATGGGATCATCTCAATGTAATCTGGGAATGGATTTTGAATGATAATCTCGGTCTTACT TTTAGA  
ATTTTTACATAGAAGTAAGTATGGC TTTATTAAGTGCCTAAA GATAACTACACACTCGATGTAAGCCGA  
TCTTTAGACACATTACTAGCCTCTCCTC TTTCCGATCGAAGAAA TTTGATTACTGG CAAA CTT TTTGTTT  
GTCCACATCCTCATTGGAATTATAATCTTAATCTTCTGTTATGGATGGCATCGTCCAGACTCTCCATCCTA  
TTTTA GAATACCAGATGATTCTGGGTCA TAAA ATCTTTGAGCACTGGCAGCTATTCTCTGTCTAC GAAAA  
CGTGAAGCTGATAAGCGCTGCTTCT TTTATCTAAA ATTAGATAAA C GAAAACAGAAA CACCGCCATCCTT  
TTGATAACAAA AAAAA CAAA CTAG TTTGTCCAACCAG TTTGTTTTTT TTTCTTATCGAAGCCTCTTTTC  
TACTA GAAA ACTTATCTTCAACATCTTGAAT TAAA TCTTCAACATACTGCTGAGGAAGAGGCTCTCTAT  
TCTCTCCCTTCCC TAAA TAGCTTGTGG CAAATGATAAGAT TAAA CATCC TAAACAAA AAGCTCCAGCTAA  
CCAAGCGTTACCTT TTTCAAATTTTC TGGGGTGGATACTC CAAA TACAGAATCTCCGGAATCGACACCG  
AAA GAAGACCCTAATCCCGTGTCTTACTCTCTTGAACAAGAACAAGTCCACACAGAATTAAGCATAACA  
AAAGGAATAAGAA CAAA AAAATGTAAA ACAGAGCAACCACCCTATCCTCC TAAA AAATTACTGGGGGAGC  
ATA CAAA AAAACTAGCACCCC TAAA CACGCCATTCCTATGCCATAGCATGGCGTAAGTATAAGCGAAGCG  
AACAAAAC TTTAAA GTCACCAGCTTCGAAGAGCACTTATAGCAAGTTCCTATGAACTA TAAA CCTCGTAA  
AATGCTGTATTTTC GACGAATCT TTTCTAAGTTATTCTTGAAGTGT TTTGT TTTG TCCTTGTCTGACATT  
CTATCAATATACAAGACGCCATGAAGATGATCAG TTTCATGCATTACAATTCTTGC TAAAAAGCCTTCTA  
AAGC TAAAGAAA ACTGCTGCCATCTAAGTT TTTCTGCTGATACTGTAATCTTATCGGGTCTAGCTACCTC  
TCCTCTTAATCCTGGGATGGA TAAA CACCCTTCA TTTCCATAAA CCAACTGCTCAGATT TTTGAGTAATT  
ACAGGATTAATGAATACCCTAG GAAA ATCACAGAAA ACAGTTCCCATCTTCTAATTCTCT TTTCTACTC  
CCATAATGAACAAA GAAA TAC TTTG TCCTACCTGTGGAGCAGCTAACCTACTCCCTTA TAAAAAGCCAT  
TGCTCACTCATATCGAGTACGAGTTGCCGACGCTCATCCGTGA TTTCCAGTTACAGGAGCCGCAAC TTTA  
CG TAAA ATCGGGCTATCGTAATACTCAAGATCTCTAATCATAATCCCACAGATCCCTATA CAAA GTCTCA  
AAA AGATAGGCCGTTCCGA TAAA CCTATGATC TAAA AAATTCCCTAGCGTCTTCTGACATAAA TTACAGG  
TTATTTCTCCGTGAAGTCGTTCACTGACTAGTATCGT CAAA GTGAA GAAAAAGTTTC ATTCATA CAAACA  
CCGAGAAGAGTGCTAT GAAATCCAAGACACCTAGAGCAGACATTGTGATG GAAA AGAAGATATTTGGAAA  
GAGAAGTCTTCC TTTCTGCTGAATAGC GAAA ACCTTC TAAATATCT TTTAATAAGTG GAAA ATTTTCAAAT  
ACTCTTC TAAAAAAATGGTCTCGGGTCTGGTCTTCTCT GAAA AACCTAACTGCTC CAAA ACCT GAAAGAC

CTTATCTTTTGGATACAGATTTTTCAAAGAATTGGCTAACAGCTTGCCTTTTGACCAAATGCCGCTCGA  
GTCAATGTAAAGAAGCTCTTCTATTTTCAGAATCAGCCAATGCAAACTGCTCGTGAACTCGCATATGGACAA  
CAGCCGAGTGCACACTTGGCTTGGGATAAAAACAATTCGGGCTAACTTTAAAAGCATATTGCACATCGGC  
GAAAAGCTTAAAAGACCGTTAACGAGCCGTAGTCCTTATCTCCAGGTTTGGCGGTAATCCGTCGAGCC  
ACCTCATCTTGATCATTACCGTAACCGTTTTCAGCGATATGGGCATTCTAGAAAAACTTGGTTAATA  
AAGGGGTAGTGATATGGTAGGGAAGATTTCGCTACTATACGTCCTTTCCCTTTCACACCTTTTATCCTCTAG  
GGATGTCAGAGGGTATTTTACAAGCATCCGTAATCTCAATATCCATTGGCAACTGGGACAGAGACTCTTCA  
AACATAGGGTCTTTTTCAGAGCAATTACATTGGCCCCTTGAAGAAAGTAGAACTTCAGATAATGCTCCGA  
AACCTGGACCAATTTTCAAGAACCAATCACCTGGCTGCACTTCTGCTGTTGTAAGAATTTTTCTTAAGAT  
GTTGCCGTCTACCAAAAATTCTGAGACAAAACCTTCTTTGCTCGCCATTCACTGATCTCAGAAAAGAA  
GTTAACTGTTCTATAGAACTCCGTGCCACCCTTCCCCGCTTTTFTAATAAAAAGAAAATAGCTGGGGAG  
CATCTTCTGCAAGAAGTTTAGTTATTGTAGCTGGATCAAAATCCGTACCGAGCATGTAACCTTATTTTATA  
GTTAGCCTCTTCTTCCGCCGCAAACTCCATCATAAGCTGTTGCTTCAACTGAGCTTCCATCTTATCAAGG  
GGATCTAAAGTTTTTGTAGCAGCATTAACAATACAAAAAGTTTCAACCCAGACGCATGTTTCGAGAACCT  
TTCACATCGCTCTTTCAGGAAAATTGATCTCTTCTAAAAGATTGTCGGTGCAGCAACGGACAACCTGAGCATC  
CTCGCGGAAGAATTTCTGAGCACATCAACTGCCCCCTTGAAGAAAGGACCAGCGCAGTCAATCGCTCT  
TTATCCCAAGAAGAGCCTTCAATTTAGACGCTCTTGAACTTTCCCTGCAATTTTGTGTGCTAAAACCTCCA  
AACCCAGCCTTAATAGTCAATACCCGATACGTCCATTGTGTGATCTGGGCAGCCTCGTCAGCAAGCTTTTG  
ATAAATCTCTCGCACCATCCCCGGAGTTACTTTTAAACATCACACGTGAACGTACCATCATCCCTTCTACG  
CGCTGAGCTACTAAGATCCGATGCACAACGTTAAAACGCTTCCGGAGTCATATCAAAAACCTTCGCGA  
AAGGAGACAAAATCACGACCGAACATCGTCTTCTTATTGATTCAGGAGGAGGTTCTATAAAAATCTT  
CTTAGCCTTAGCATCTGCAGCCATGAGAAACTCGTTAATTACCGTTTCCAGAACACAGGCCACATAGCA  
GAATAATATTGAGATCTTGCAGATACAGAATCTACCAACTGCGGGCAAGTCGAGTAAAAGAATATTCA  
ACTTGCGAATCACATCTAAAGTCGTGACGACAGTGTCTTCGTCTACCTTAAATAACACCCGATTATGGAT  
GGCTACTCCAGAAGGATTTTGTCTCAAAGGAACCAGACGAGAAAGCTCCCTCATAGCCAAAAGCGATTCCA  
GAAAAAATCGTGATCCCTAGATAGCAAGCTATAACAGCACGTTTCACTACTCGCATCCTTGATTTTGTAGT  
TTTTAGGTAGAAAACCTTAAGAATTTTGGGTTGTTCCCTCCCTTTTCTTTGGATCTTACCGCCTC  
CCTAGAGATGTGGCAAAACCCCAAACAGCAGCTTATATTCTAAAAGAAACCTACCCTCGTCCTAGGT  
AAAAGCTATAGGGGAGGAGGGACCCAGCCGTCAGAACACTTTTAAACAAAAGCGTTATATCCTCAAGCC  
AAAGGAAACAAAATGTATTTTGGGAATTTTTCACTTAAATATCGAAAAGAGGGGTAACCTAAGAGCA  
AAACACGCGTTTAGCTGAGTTGAGACATAAACTCATAGAAATGCTCTAAAGAAGTAAAACCTCTACCACA  
ATCCTTATCCAAGAGATAAAATTTTGTGGAAGCCCTCTTTTGAAGGAATCAATCGTTTCTCTCCCTCT  
GGAAGATATGCACTTAGAATCTCACGATCTTTGGCAGTCAACCAAAACCAAGGAAGTATGGGGAAGAAAA  
TCCCCTTAAAACAATCTAATACCTGTGCTCTATCCCTTCAATCCCATAAGAAATAAAAATCTTCTGATG  
TTGTTGGAAAAATACTCTTGGAGCTGCAAGCAAACTTCCCAGAGAGGAAAATTTATGTTTGGCCACTTT  
CCTTGAACGCATTGTAAAATGTCTCTGCGAACGTTAGATAATGTCGTTTACCTGAAATGATATGCAATT  
TCAACAAGCCTTGGCAAAGCAAAACGATTGCTCGATATAGCGTCCCATCTACAAAACAAGCTTCTTTTAT  
CAAACAAGGAAGAATCCCTTCCATCCGTGGAATAAAATCCCCCTGTATCGGCTCGAAAAGACACCAACT  
TCCTTCGCCAGCTCTTCAGCTAGCACCAACCACTTAGCCCCAGATCCTATTTTCAAAATAGAGCTAAAAGCTC  
CCATAATCATGGCAGCATAATCCTCTAATCCTGCAGAGTATTTTGGACTCTCCCTGTCTCCATCGACGCAA  
TAAACGGCCATTCTTATACAGATTGTTTCGCAATAAACTCTCCACATCTCTCTGCCACCAAAAACATTCT  
GGTCTCCTAGAAGAATCCCTGTTTATATCAGAGAAAAGATTCCCCAACCATTTTGGAAAGTAAAAGACT  
GATCATCTTTTGGAAAGCTTGGATTTCCTTCCCTATAGACACATAATTTCCTCGTGAAGCTTCTAATTT  
CTTCTGAAATCTTTCAAAAGAACAATGATAACGCTTCAATCTCTTTCTATTCATGTAAGGAAGAACG  
TGTAAGATATCCGTCCGTTACAAATTCCTTCCCTAGACACATCATAGTACTCGAAAACATCTCTGCTT  
GCTCTCCTAACAGAGAGCGAATCTCTTCCCAGGACCAGTGTACTGGCTATCAATATCGGTTCTCTGCCCA  
CTGTTGACCGTATTCAAGAAAGATAAAAAGATCCTGATTTTAGGATCCGTTAGCTCTTTAATTAATAATTA  
AGAACCCGTTTCGCTACAATGACGAACCTCCGGATTTCTCATATATACGCCGGCTTCAGTAAAAACAAGCA  
TCATAAGAGCATTGTCAAAGCTCGCTTTTCAAAAGCACGGAATCAACCAACGATCATCTATAGTGTAAAG  
GAAAACCTCCCGCTAAATGATCAAAGATGCCCCCAATTTGCCACAGATTGTAGAGATCTATTACGAAA  
AAAATAGCCCGACTATCTTGATACTCTGCTCCTACCCGCAAAAAGAAATAAACTAAGCAACCCAGGCAATG  
TCTTAGGAAATGACTTCACACCTCAAAATGCGCATCCACGTGCGGATAAAATAGCTTCTGTACCCCTCTT  
TAAGCATCTTCTTCTTAAACACTCTTTTAAACAAGAACCCTTCTAGAAAAGCGGCTACTTCAAGAAGT

C T T T C T G C C T G T T G A A C A A A T A C C T C T C T A T C C T C T C G A T C T T C C C A C A T G A T A T G T A G C T T T T C C A A C A  
T C T G G A C A A A G G A C G A G G C T C T C A T T T T C C C T G C A A A G C T A G C A T A T C C C A A G C T A A A G A A A G G C A A G A G  
A T T G G G G G T G A G G A A A C A T T C A G A G G C C A T G T T G G A G A A T C T T G T A C C T C T C C G G A T A C G G A A A G C A T C  
T G A G A T A A T T C G A A A T A T A G A T T T T G C C A G A T G A G G C A A T T C T T C C T T A T C T A C C T T A A T A C A A A C A A A T  
A C T T G T T T T A A A A T C G C T G C A A C T T C A G G G T T T T C A T A A T T T T C C T T A A G C A T G A C T T G G C A C C A C T T A G A  
G T G A G T G C A C C C T A T A G A C A A A A A A T C G G T T T A T C C T C T G C A G A A G C C T T T T G G A A T G C T T C T G C C G A C  
C A A G G G T A C C A G T C C A C A G G A G T A T G A G C A T A A A G A A G A A G G T A T G G G G A T T T T T C G G T A A T A A G T T T T A T  
T T G T G A A A G G C T G G T C C G T C G T C A T G A T A A A A A A T A A A A A A A C A A A A G G T A T A C T T T T A A T T T T A A A T  
C A A A A A C T A T A C T T T C C T A A A T A T T T T A C T C G A C A A A C C T A A T A A A A A A T G G T T A T A A A C A A C C C A A A A  
T C C C T T T T C C C T T C A T T T T C T A A T A A C T A A A T A G G G A A T T C T T G A T C T T A A A C T A T A A T A A G C G T T A C C A  
T A C G T C C T T T T A T T G C C G A G T C T C T T T A C G G A A G A G T G G C A G A G T G G T C G A A T G C A T C T G A T T C G A A A T C  
A G A A G T C C C T C A A C G G G G A C C G G G G T T C G A A T C C C T T C T C T T C C G A A T T T T C C T A A C T A T C T T A T C T G T  
A A C C T T T T A C C T T T A T T A G G C G T G G T A A A T A C G C T T T T T T G G T A A A A T G G A G G G G T T T G G A G G A A G A G A C  
T T C T T C T A A T C C C T C T T T C C T A A A G A A T T T A C A A A T T T T T T A G T T T G A T A G T A G A A A C A T A T G C C T G T A  
G T A C A G A A A C C T T C A G T T T T G G A G T A C G C T C C T G T T T C T C C T T C A C G A C T T C T G A T T C A A A A A T A C C A A  
A C C A C C G A T C T G G A G C C T C T T G T A T C A A G A T C T C C A T G A T T T T G G C A T G T T C T C T T C T A G C G G T C G G C A T  
T A T T C T C G C A A T A G C C T T G C T T G C T T C C C C T G G A A G T C T T G C C T A T G T C T T A G T A G C T G G T A T A T T A G C T  
C T T C A T G C C G T T T T A G C C C T T G C T T T A G G A T T A T G G A T T T T C C T C A T C A A C C A A G C A T G C A C T A C T G A G T G  
A A A A C T C C G G T A C C G A G C T G A T T A C A A C A A A G A A A C A C A A T A A A A C C C A C T C A A C C C A G A G A T C T T T T A  
T G G C T A C C C G A T T G C T G T A C C G C C T T C T T C A G C G T C A T C A C A A T C T T C T C C G G A T G T T T C C C C A C A T T C  
A T C T T C C G C T T C T G C T A A A A A T G C A A T A T A C A A C A C T A A A A C A G G G A A G A C C T T G G C C T G T C A T A G T A A G C  
C A A A T C G C T C T T T T A A T T A T G A G A A T T T T C C T C T A T T A T T G T G C T T G G A T T A G G A A T A G C G T T T T C T G G C A T  
C G A A T C C T A T G T T A G G A T G G A G C C T G C T T A T T G C A G C G A T T A C C C T A G T G A T C T C T T C T A T T A T G T G C  
T A T T G C A A T C T C C G T C T A C C A G A C T C T A A C T A T C C G A A A C T A C A A A G C G A A G T C C C T C A C T A G A A C G C  
C A G T C T G G C G T C A T C T T T A T A G A A G A A G G T G T C G A A G A C G C C C T T C T G T C C T T T G A G A G T C C A T T C G C A G  
G A T T A G A A G A T G A C C T C G T A T C T C C T A T C T C T C C A C C A C T C T C T C C T G A G G A T C G C T C T T A T A G A T C A T C  
T G G T G A T G C A A G C C G A A G C T A G A A G C C T C G A A G A G C A C T G C T A A T G C A G C T T G C T C T T C T A C C C T T A G A G  
G C C T T G G A C A G A A G G G C T C T C T T C G G A A A T C T T A T T T T C T G A T A A A T A A T C T T C G T A C A G A T C G T C C T  
T G A A C T A C A A G A G C G A T C T T C A C A A T T T T A C C A A T A A G A A A A G G T A A A A C T C C T A T T T T A A A A G C T C C G A  
C T A G A T C A A G A G A G T T T T G A A A C T C C A A T A C T C T T C A G A A A C A G G C A A G C C A T A A A G C T C C T A A A C A G A G  
G C T A A C C C T C C G C C A A C G A A C A A A A T C A T C G C G A C A A C C C A C G A T T T T G C T T C G A T C T T C C A A A C T T A  
C C A T A C A A C C A A G A A A T G A G C G C T A C T G C A G G T A C A A A G A A A A T A G A T A T C C A G C A G T A G G T C C A C A A A  
A C A C T G C T A T C C C A C A C A T A G G A C T A C A A A A G A C A G G G A A G A A C A A C C C C T C T A A C A A A T A G G C C A C T A C  
T G T C G T A A C A G C C A T C T G T G G A G T C A T A A C A A G C C C T A A A C A A A A T A C C C C A G A G T C T G A A A T G T A A T A  
G G A A C T G G G G T A A A A G G G A G A C T T A T A C T G A T C T T A G C T A A A C A A G C T A A G A A C A A G G A C C C G G C A A T A A  
C C T T C A C A A A A G G A T T A C T T A T G A G A G T T T T C T G A G T A T C T T T A G T A A T G C T C T T A G C A A C C A T A T C C C T  
T C C A C A A A T T C A C C G A A T C G A T A C T A A G G T A T C C G G C T T T A A A C C A A C T A C A G A C A T C C T T C A A C T T C C  
T C T G A A G T T T T G C C T A G A T A A G G A T A G C T A C A G A A G G A A A A A G C A G C C G C A C C A T A A T A T A A A T A T G G C  
G C G A A G C T T T T C T G G A A A C G A T C T C C A T G G A G A T T T A C C C A G A A A A A C T T T T C T C C A G T C T A A A T G A A A G G A  
T T T T T T A A T G C A T G C A A A A A T T T T C T T T G C T T T C C T A T T T T C T G C T C T C T T C A C A A G A T C G C G A A T A T  
A T T G C T C C T T T T T C C A A G C C A T T C T T T C T C G G C T T T T T C T C G T C C C A A G A T A A T C G T T C T T C T T T A A A  
A G C C A A C T C T C T T T C C C G T A A T T C T A A A T C T T T T C T C T C A A A A A A C T T G C C T C T T C T T C T T T G C G C T G A  
A A A G A C T C T G T A C A T T G C T G T A A A G C A T T G A G A A C G T C T T T T A T C A T G C A C T C A C T A A T C A T T G C G C T C T  
C T T C C A C A C G A T C C T A T C G T T T T G C T C A G A G A T A G G C T G T T C A T T A C T A G A C A A A G A A T C T T G A G T A G A  
A A C G T C C T C T A A A A A A T C C T C T G A A T C T T T T C A G C A A G G A T T T T T T T A A T A A T T C A C A A A A T T C C A A A  
G A A T C T G T T A C T T C A T C G A A T A A A A G A C T C A T A T A C C C A A T T T T C T T T G C A T A T T T C T T T A G A A T C T C A A  
T A A C A C G C T G T T C T T T C T T C T C T A A C T C C A G T T G A C T G T T G G C T G A T T C A A C T G C T G A A A T G A A T G T  
C A T C C T T C A T T A G A T C C C C T A T A A A G G C C C T C C G C T A C T T T C C A G T G T A A C T A G C A A G C A T A A G C A A  
C C G A T G G A A C C A A A C A G A A T G C T T T T C T C A T A A A A T G T A G T G A A A T C T C C C T A T T G A A T A T A G A C A C A A A  
A A C C C T T T A T T A C C T C T G T A A A A A G A C G T A A T A A A A G G G C A C A G T T C A T C T C A T T T T A G A A G A C A G A T A G G  
C T T T T C T A T C T G C C A A A T C A A A C T T A T T A T T T A G T G A T G A T C C T C A C T A T A T C A C T G C C G G C A T A C G C  
T G A G A A G C T C T G T T T G C A A A G T A G C C C T A C A A G C T A G A A T G T C T G C T A A C T C A T C T C T T C T C T G C A A A T C  
T C G T A T A G A A A G A G G T G G A C G C A C C G C A T C A C A C T C A A T C A T T T T C T G A G C T G C C A T T A G A G C T T T G A T C

CC TAAAGGATTTCGTAGATAAGTTGAGCCAAGAA CAAACTTTC TTCCAAGCTTCAATAGGACGACCTAGAG  
CAACATAATCTCGAGCTAATTCTGGC CAAACGTTAGCTAGTACA GAAATCACTCCAGATGCTCCAGATAA  
TCGCATATCTGGCCACAGATTGTCGTCACCA CAAACACTCTCAATCCTGACTCAG CAAAAAGCTCACAA  
GCCTGAGCAGACCCTCCAGAATCCTTAACCTATGCA CAAAGGATGTGATA CAAAAGATTTTACGACCT  
CTGGATA CAAAGACACGCCGGTACGAATAGGATTGTTA TAAAGAATGATAGGC TTTCTACTTACACT CAA  
AACCTTAT CAAACCAAGCTTTTGTCCATTAAGCCAGGTCTCGTAT TAAAGAGGAGTTGGAACAAGGAAC  
CCATCTATAGGCCATTTGCTGTG CAAATCAATCCAAGACATAG TTTCTGAACAGACGTTGCCGTCACTC  
CTA CAAATATCGGCACATTCAAGTTAAGCGTA GAAACAAAC GAAAGAATAGAAA GCTTCTCTCATAACGT  
TAGAGACAACCCCTCTCCTGTGCTAC CAAATAAAAATAATGCCGTTACCGGCGTGCTCTTGCGAACGAACG  
ACACTCTC TAAAGCAGC GAAATCTATAGACAAA TCAGCCT TAAAGGTTAATAACAGGCCCCCAAGACAC  
TCA TAAATAACTCCTATTTTAAATAGGCAATCGTGCAACAACCTCGGTTACAGCGACCC CAAATCCTTATT  
AATAAT TAAATTAATAACCGTATCCG TTTGACTCCAACA TAAACTGGAGTTCTGTGTAGAGCCT CAAAG  
ACTCTAGACATACTCCATGAAGCTAGCTTCGCTCCACTAATGCAAC TAAAGAT TAAAGGCCCTCACAAAC  
TTACTGTAC CAAAAGCTTCAAGAGCC TTTGTTATAGCCTGAGGATACTCTTCCAATCTATAGT GAAATA  
CACTCC TAAACTTTGAGCCATGACAACCTCCTGGAA CAAATCCCAAGCTTCGTACACAACC CAAAACATCC  
TCTAGTCTCACTAGAGGAGAATTGTATTCTA CAAAC CAAAGAGCTTGATTGACTTCAATGAGAGTGCTT  
TGATCACAGGACCCTCTGTACTCTCA TTTAATGAAGCG CAAATCCAAGTCCCTTC TTTGGTTACAT TAA  
TGTTGAAGTCA CAAA AATAGGCACCTTCGCTCGAACACAAGGC TTTAACATATCTTGGTGCAATACCTTA  
GCACCAGAACTTGCTAACTCCTGCATCTCTT CAAAGGT TAAAGAATCTATGAGTTGTGTATCTTTTCAAGA  
TT TTTGGGTCGGCTGTATGCACGCCA CAAACATCTGTAT TAAATACGCAACTCTCTTGC TTTACACAGTTC  
TCCTATCAGAGAGGCA GAAAAGTCACTCCCCCTCGACCAAGAACTGTAGT TTTCCCTGAAGACGTTGCT  
CCAAGGAAGCCTTGCATAAGT TAAATAGCATCTTCTGTAAATGCCAACTCACCCCAAGCAG TTTGCATCA  
AAGCT TAAATCTGGAACCGCCCG CAAA AATTGCGAGTCGGTGAGAATTACTTTGACGAGCTTCTAACCGCTT  
AAGCGGTAACACATAGGTACAGCAGTAGCTA CAAAT CAAAGTCGAAGA TAAATCCTCACCTATAGC CAAA  
ATCCTGGCTTGATCTTCA GAAAGAAGCTCTTCTACATCTT CAAATGTTCCAAGATCTCC CAAAAGATAG  
CTAGA GAAACCTCTATACCTAATTCC TTTGCTATTGATT CATGTC TTTCTCGAATCT TTTAGTCAATGC  
CGCTCTCTTCCC TTTAGGAAGCCGA CAAACTCTTCTAACCAATCCGTAACACCAGCTACTGCGCTAACA  
ACAA CAAAAGAAGGTC TTTCTTCTGTATAATCTCG CAAACTCGTCGAATAC TTTGGGCTGTGCCACAC  
TTGTTCACCAGAA TTTACACACAAGAGGAGCTGTTT TTTGTCTAAGCATAACGTCAGCCTCTCTTGATGAA  
CGAATCCTCCTCTATCTCG GAAAAGATT CATATTGCTAT CAAAGCTCCTGCAGCTCCTCGAAC CAAATT  
GTGCAATAAGATACACATCTTAATAGTTTCGCGTATTACCGCCGTAA GAAATGGGCCCTATATGTAATCGC  
ATATCATCATGAGCTAGATCC TTTGAACTGAGGATGCCAAGGAGAATCAT TAAAGAATAGGTAGCCG  
AATCCTTCTCATAACAAGAAGTTATCTTCT TAAATCGACCTCTGAT CAAACATAACGTGTACAGAGAT  
GACATGCCCATGTGCAACAGGAACACGATGTACAGACGCAGTTATA GAAAACCTCTGCAG GAAAACCTGGC  
TGTC TAAATTTTACAGTCTCTCGGAGTATCTTCTTCTCCTCCTAAGATATAAGGCACAGTG TTTT  
CAAT TAAATCTAAAGAG GAAACTCCAGGATATCCAGCCCCTAGCTGATTG TAAAGTGATAACATGCAC  
ATGCTCGATATTAAACAACAGCAGTGGCTTAAGAGCCAGAGCAATGCCT GAAACACAACAATTAGAATTG  
GTAATAATCTTACC TAAAAGGCTGTTCTTCTAACAGAGA CAAATGATCACTG TTTATCTCAGGAATTA  
AAATAGGAACCGCT TTTATGCATACGATAGGCGGTGGCATTAGAAAACACTATC TTTCCGAAGA TAAACA  
AGTAG TTTCTGCT GAAAAGCGACAGACGAAGGAAGACAAGATACAACAATA TTTGATTCTATCTCTTCA  
ACGGAGCGAATAGA TAAATCACGAACAGACTCTGGCATCTCCATTAATGGCTCTTGCCA TAAACAAGCAG  
ATTCGTAACGCAACGCATGCTTCTCAGAAGAAGCTCCTAATTCAGCAA TTTCCACTGT TTTATGAT TTTG  
TAA CAAAGCAATAAGCT TTTGTCCAACAAGGCCTGTAGCACCT TAAATCGCAATGCGCATCGTCATTCTT  
AGCT TTTAAC CAAACACCT TTTCTT GAAACAAA CTCTCATA CAAAACATCTGAGGTGTAATATCCT TTTG  
GCAAGCCTTCTCCATAATCTTCTCCAAGATTAGCAACACTCCATCA GAAAAAACACGTCGAGAAAAGAC  
TTCGTGCCGAATTA CAAAACGCTCATCTTCCCCTA CAAAAGATACTTCATGCTCGCCA CAAACATTCCTT  
AAA CGAGAACCATGCATTTTCTGAT TAAAGGCTCTGGCTCTTCTCACAGCTCTCTGCCTTCGCAGAACGGA  
TAGCTTCAGC CAAAGAAA TCGCTGTACCAGAAA TGGCATCTGC TTTAGCACGGTGATGTGTCTC TAAAT  
ACGAACATCATAAGAAGTGC TAAAAGT TTTGCAG CAAAGCTGCTAATCGCT TTTGTACATACGCCCC  
AACTCGTG TTTGCA CAAAACAACAACAGGAACATATCTGATAATGCTGATAAC TTTGTTT TTAACCCGC  
TATCATTAG TAAATCCTGTAGTTCCAATAATCACAGGCCTAGGTGTT TTTAACAAA AAGTCTAAAAGCAG  
CGACGTCACTTCAGGAGACGAGAAA TCAATAAGAATATCATTCTCTGTAACAACCTCTTCTAGCGAGGTC  
TGAGATCTTCTT GAAAACCCCTTTCC CAAAAAACAGTGAGGACGA CAAAGTAAA GCCTGAGTCAATAAGA

CACCCATCCTTCCAGTATCTCCGACAAGGCCTATGCTTTTTTTTCATAATACTATCAGCAACTCTCATCCA  
CCATTGTGGAACCTATAGGATCCTCTTAGCAAAATGGCTAAAAGAAAACCACTGCAGCAGTATAGTATAAGT  
GAGTAAATAGCTCCAACAGGAAAAGCAAAGCAAAATTCGCAAACTTGCTCTTTTTCCTAATTTATTTAGAG  
AAAGAACTTTAGATGTGCACCTGAATATTTTTGTACGATTCTACAAAAGAATCCCCATCGACCTCAAAA  
GACTCTGCAACAAGATCAACTATGATGTCTTCTGCATCAAAATCACATGCAGAAGCTCCCTGAACGATCA  
CACTTTGTTCGGTCTGAATATAGTCACGAAGTTTAATCAGCTGTTTCATACAGCCACTGAAATAATCGCTG  
AAGATACATGGTAATACTAATTCCATAAAGGACTCCTCCTATAGCTAAAATACCTCCAGATATAGGAGCT  
AATCCAGGAATTAGAGTTAAAGAGAGAACTCCCAAAACAGCTAGAAGGATTATGGTAGCAACTAAAATAG  
ATTGGAATCTTTCTTCCTTAGTTGCTCCATTACATACTCACGAATAGCTTGCTCTGTTTGAAAATCAC  
CGGTTTCCAACTAACTTCCAAGTTTCTCTTGCTCCTTCTTGAAAAGCAAGCTTGACGGCTTTACCCC  
CATCGTCTATTATCCAATTTCCCTTATCATGCGCGCTTTCAAAACGAGCTTCTCTTCTACGAGCTAAAATAA  
TCTGTAATCTAGCTTTTAGTTGATGAGCGACATGAACCATTCCAAGAAACACCATTGGAACAGCTGACAA  
TAATACAGCTCTTCTATAAAAATAGGAGCAACACTTGTACAGCAGGCAATCCCCCAATCCAGCCAAT  
AAAGTACAAGTAACCCCTGCTAGCAATAATAATCTGATAAAAATCAGGATCCGCTGTTGTTTCTTCGTTA  
AAGACAATGCTGCATCTATTTCTCCTTGAGGCAAAAGTTCAATAGAAGGAAGATTAGACTCTCTAGGATC  
GACTACCACCTCTATATTGTTATCTACCCGATAACTGAAGTCTGCTTGAGAAAATGTTTTTTAGTTTAGTA  
TCAACAAGTAAATCTTGATCTTGTGAGCTCTAGCAAAAGCTCTCCATTGCCCTAGAGTTGTGTGCAGCA  
TATTCGAGATCACATAAGAAATCCCTAAACTGATTAAGGAGGAGCCAACACTATAAGAGCTGTTGCGGC  
CCCTCCAGTTACAGCAAGAGTTCCAACAACAGCTAAAGCAATCCCTAAACACGCAAAACCAACTCCTAAT  
AGAACTAATCCATTCGCTAGCTTCCGTATCTTTGCTCCTTCTATGAGCATCTCTTCTGGAGTAAGAGCTT  
CACCCGATGCAGCTTTTTTTACTGAAAAAGCGCACATAGAGATAGTGAGCGAACCCCTGCAAAAGAGC  
TCCCTCTCCCTTTATTATAAGAAACATCCCAAGTTTCCGAGAGCGCTACCATATCCCCCAGGAATATAA  
GAAGATCCAAGTTTCAGCACAAGACCAGCTCCCGTTAATCCTGCACCAAGGAGAGCTGCGCTCTTTGCC  
TCTGTCTGAATGTCAATCTCGGAGCAACTACGGTCTTAATTCCATTAATAAGACTTCTTAACGTGGTAAC  
TCCACCGACAGAAAATCCTGAAAAGCAATCGCTAAAACAATCGATTGCGGAACCTCCAGGAGCTAGTATC  
GTTAGGGCGATAGCCACAATTGCTAATGCAACCCCTAATACAACAATACCTGCAATGAGCTCTGTGCAAT  
ATTTTAGCGTTTTCTTGATTTAGAACTGTTTCAATTAGGGAGATAAAATCGCTGATACAGAAAATCCTGA  
GTTCTGATTTGTACAGGAGAAAAGTTACTAAGAGCAATTAATCAACAGGATCACTACTTCCAGGAACC  
CTAGAAAACATAAAAACATAAAAATCTTTCAACAAGATTAATTATAACAACAAAATAAAATCCTTTTCA  
TAACAAAAAATAGAACTTATTTCCCTCGTATGATCTTAATATCATGCAAAAACCTCTTCCGAAGACTA  
CATTAGCTATTCAATTTTAACCTTTTAGAAAATAGACATATGGTCTCTTCCGAACCAAGCCCTCTTATT  
TCTCCCTCAATTCCTTACGGAGAAAATGCTGTTCCCTCCGTCAAAATCACATTCTCTACGCGGATCCTTT  
TTGCCCTCTATCAAAAGGACCTCTATCATAGAAACTGTCTCTTCTCCTCCGATTCCCAAACTATGCT  
TACAGCCTGTGAGAAAATGGGAGCTCACGTTAGAAGAATAGGAGACTCCTTACATATCCAGGGGAATCCC  
GATCCCATCACTGTCACCCACCCTATTTCCATATGGGGAATTCTGGTATCGCCCTTCCGATTCTAACC  
CCCCTTCTACTTTATCCCCACCCCCACTTTGATCACAGGATCCACACACTCAAAACGACGTCTATAGC  
GCCTCTTCTATCAAGCTTAACACAGCTTGGTGCACATTCGCCAAAACATCTTCTTCTATTCCTTT  
ACCATCCATGGTCCATTATCCCTGGCCATGTTACTATCTCTGGACAAGATTCCCAATACGCATCAGCAT  
TAGCAATCACTGCAGCTTTAGCTCCATATCCCCTTTCTTTTCTATCGAAAATCTTAAGAAGCTCCTTG  
GTTGATCTGACCTTAGATTGGCTACACTCTTTAAACATCTCTTTCCTAAGAGACCAAGATTCCTTAAC  
TTCCCGGAGGACAATCATTAGAAAATTTCTTATTCTGTGCTGGAGACTATAGTTCTGCTGCTTTTT  
TAGCTTCCTTTGTCTACTCTCTTCTTCTTAAAACCAACTATCTCCGTAATCTTCTTCTCAAGATTC  
TCAAGGGGACAAGCTTCTCTTCTCTTTATTAACAACCTTGGAGCCCATATTCTTATTAAAAACATCAT  
ATCGAAATGCACCCCTCTCTTTCTCCGGAGGTGAAATGATATGGATCCATTATAGATGCATTACCCA  
TCCTTGCTGTCTCTGCTGCTTTGCAAAAATCCATCGCGCTGTATAATGCGTTGGGAGCAAAAGGACAA  
AGAAAATCAATCGCATGAAGCCATGCCCATGAATGCAAAAATGGGTGGTCTGTCCACCCTACTCGT  
GACGGTCTATATATAGAGCCCTCGCGTTACATGGTGGGTTGTTGATTCTCATAATGATCACCGTATTG  
CTATGGCTCTCGCTGTAGCTGGAGTTCATGCCTCGTCCGGAACAAACCTCTGTAAACACACAGTGTAT  
AAAATAAGAGTTTTCCACATTTCTGTGATTGCAGCGCAGACACTACATGCCAACGTTCCGACACTACCAAGCA  
GATTTTCTTTGCGGTCTTCTTCTGTAGGTAACCTCGTTTGTCAACAATTAATCGCAATTTCTATCG  
CTGCCTTTTTTTGATAACAGATCACCTTCTTTAGATCGTTTCCATGGAGATTCTCCATAAACTATCTACC  
AACGCTATGGAGAAGAAGTTTGTGAGAGAAGATTCCTTGCCCTAACTAGTGTACCTGTCAATTCCTAG  
CATCGTAGCTTTAGGAGGCTGTACCCCTCTTATTGAACCATCTTACGCCATATTTTGGGGAGAAAACAT

GCTCTCTTAGTCTTACTCGAACTCCCCATCGCTACACTATGTCAACGCCTACAACATAGATCTATTCCTG  
AAA GACTTGCACATGCTCCATCATTAGAAGATGCTTTGTCTCAACGATTAGACAAA CTACGATCCCTCAC  
ATCAAATGCCTTCTCTTTACGAGCAGAGACTTCTCTGAAGCTGTGATGAGAGATTGTCAAAGCTTTTGT  
TTGCGTTT TTTGAGCACAAAAGAGAGCTCCTATGCATAATCAATATGGCTCCATATTTCTCTACTACT  
TGGGGAGAATCCCATGGCCCTGCTATAGGCGTCTAATTGATGGGTGTCCTGCAGGTCTCTCCTTATCAC  
CAGAAGATTTTC TTCCCGCTATGGCTAGAAGGAGACCAGGGCAACTTCATACTTCTCCTCGTCAAGAACC  
GGACCTAGTCACTATTTATCTGGAGTCTACAAAA CAAAACAACAGGAACTCCAATCTCTCTTCTTATT  
GAAAACAAGGATGTATCCAGCTCTTCTTATGAACATCTACAACACTGTTACCGACCGGGGCACGCACAAT  
TTGCCTATGAAGGGAAATACGGATTTGCAGACAACCGTGGAGGAGACGCGCCTCTGCTAGAGAGACCGC  
GTCTCGAGTTGCTGCTGGTGTGATTGC TAAAAAGATCCTTTTA TCTCAAGGAATC GAAACACTCGCATTC  
CTTTC TGGATTCCGGCACCTTAGAGAG TAAAAATTATCC CAAAC TTTTC GACTCGCTAATACAACAGGTTTC  
ATACCTCTCCTTTCTACACACTCCTTCTCAAGAA GAAATTCAGAATCTCCTTCTGCTTAATCCTGACGA  
CTCTTTTG GAGGTGTAGTCTCTTTTATCACTTCTCC TTTTACCTATAGGCCTAGGCGAACCTGTG TTTGGA  
AAGCTTCCAGCTCTTTTAGCTGCAGGCATGATGAGCATCCCTGCGGC TAAAGGA TTTGAAATAGGAGCCG  
GTTTCTCTTCATCACAAATGACAGGCTCCGCCTATCTAGATGCA TTTTATTGCTGAT GAAAGTGGGGTGTCT  
TCTTCAAAGTAATCGCTGTGGAGGAGC TTTTAGGGGGGATTAGTATTGGGCAGCCTCTTGAAGGCCGTGTA  
GCCTTCAAACCTACTTCTATCTATAAAA AACCTTGCTCCTCCGT TTTTAAAGATGGCACACCGATCGCAT  
ACCGCACCCCTAATCAAGGACGCCACGATCCTTGTGTAGCCATTCGAGCTGTTGCCGTTGTTGAGGCTAT  
GCTTGA TTTTAACTCTAGTAGACCTGCTTCTCCAACATCGTTGTACCCAATTATGATCGAACTCGTTACCG  
ACTCTCCTCACCTATTACCTAGTTGATTCTTTTACAAA ACCCTAAGCTGTTTG CTTCTGTTGTCTACCGA  
CTTCCCTCTCATT TTTATAACCAATACTAAGCTCAACACTCTTATCCTACCTCCTCTATTAGACTTGCT  
CGCTCACTAGGAT TTTCCGTA GAAACACTTACCATTCTGAAAGGAGAA GAAACCAAGACGGGCGATACT T  
TTCTATCTTTTG CACCAACAACCTGACAGATCTCAATGTACCTAGACAAGCAACTTTTAAATTGGAGTAGGTGG  
AGGCGTAATTTTAGATATAGCAGGC TTTGTAGCTGCCACACATTGTCGAGGGATGCC TTTTCATTGCTATT  
CCCACCAC TTTAGTTGCTATGATTGATGCTAGCATTGGAGG GAAA AATGGCATTAACT TAAATCATA TAA  
AAAATCGCATCGGCTCTT TTTATCTCCC TAAAGCTGTATGGATCTGCCCTAGAAA ACTCTCT TTTCTTCC  
TCAGCAAGAACTCCATCATGGAATAGCTGAATGCAT CAAACATGCTTATATCGCAGATTCTGCCATCCTA  
CCTCTGCTTCAAGATCCTAATGCT TTTAAAAAAGAAGACAAGCTGTCTCTTCTTAT CAAAAAGAACTGTC  
TCTG CAAAGCTTCTGTAGTACAACAAGATGTCAGAGACTATG CAAACGCG CAAATAC TAAAC TTTGGCA  
TACGCTAGGGCATGCTCTG GAAATGCTATTTATAGG GAAAATTCCCCTAGCTGTGCCATAAGCGTGGGA  
ATGGTCCTAGAAACAAA GCTATCTCTATCCTTGGGAGTTGCTCGCTCTCCAGCTATACTACATTC TTTGA  
TACAAGACCTTTTAAAGATATCAGCTCCCTGTTTC TC TAAAGATCTTTTATATGAGAGCG CAAATACCTCC  
ACATAATTGCGAT CAAATCCTCTCCGCTCTCACCTACGATAA GAAA AAA CAAAATACTCCCTTACCACCA  
TTTGT CATGATAGAAGAGATCGGACTAGCAGCTTCT TTTGATGGACGAT TTTGC CAAACTATATCT TAAAC  
ACATCTTACAAAAGTCCCTGGAGGAAGAATTCATGCTATGCACAACAATTAGTGGACCTTCT TTTCTG  
AAGCTAAGAAGCAGATACTACGCTCTTTTAAAAGAATGTCATTGCT TTTGAAATGCGGGTAGATCTTCT TTTCT  
TGTATCTTG TTTGAACCTCAA GAAACTCATGGAAC TAGCTCCTA TTTTCATTCTTGCATG GAAAAAACCT  
GAATCATGCTCACAAGCAGACTGGATAGATAAAATGCAATCGCTAGCTGAGCTAAA TC CAAACTATCTAG  
ACTTG GAAAAAGAT TTTTC CAGAAGAGGATATGATACGCATTGCAACACTCCATCT CAAATTAAGATCAT  
TCGTTCCCTTACATACTAGTGAGCATACCGACATTATACAACTCTATGCACATATGCGATCTTCAGCAGCT  
GACTACTA TAAATTCGCTG TTTCTCTTCCCTCAACGACAGATCTCCTAGATATCTGTAC CAAA AACGCT  
CTCTTCCCT GAAAATACAACTGTAG TTTGTCTAGGAGGAATGGGGCGCCCTTACGAATACTCTCCCGAT  
CTTA CAAAATCCA TTTACCTACGCAAGAAGTACAGGATCTTCCCCGTAGCTCCAGGGCAAT TTTCTCTC  
AAA CACCATA TTTCTACAATTTTC GCAAGCC TTTCTGCTCAATCCCCATCTGCGCTCTTATAGGAGACA  
CTTCACGAAGTATCGGGCATTTAAACCCATAATCC TTTCT TTTCCCAACTCGGAGTAGCTTGCCCATATAT  
TAAA CTCCC TTTAACCCCTCAAGAGCTCCC TAAA TTCTTCTCTACCATTGCGACGCAACCCTT TTTAGGA  
GTCAGCGTGACTTCCCATT GAAA ACTGCTGTTCTACCG TTTCTTTGA TAAA CAAGCTCCATCTGT GAAAG  
CTTCCGGATCCTGTAATACGCTAGTCATTGCGCAAGGA GAAA TTGAAGGACATGATACCGATGGCGAAGG  
GTTGT TTTCTGTATTGATGCAGCAC CAAATTCCT TTTAAA TAAACAACGAGTTGCTATTATAGGAGCAGGT  
GGAGCAGCTCAATCCATAGCAACTCGATTGAGCAGAG CAAACTGTGAACTTCTTATT TTTAACCGCACTA  
AAAGCGCATGCTGAGGATCTAGCTTCTCGTTGCCAGG CAAAAGCATTCTCGCTGGAGGAACTCCCTCTACA  
CAGAGTCTCCCTTATCATCAATTGCC TTTCTCCTTCTCCTTCTTGTACCATTCC TAAAGCAGTTGCTCCC  
TGTGTTGTGCATATTAATACAATTCC TAAA CATAGTGCCTTCACTCAGTATGCTCGATCTCAGGGAAGCT



CCATTA**TTTA**TGGTCATGAGATGTTACGCAGCAAGCTCTCTTACAA**TTTC**G**TTTA**TGGTTCCCAACGCT  
CTC**TTTC**AAGCA**TTTG**GAAAAAAC**TTTA**ATTCGTAGAGCTGCTGTCTTAGCTTCTCTTT**TTTC**CATCGCA  
CCA**TAAA**CATTTTT**TTTC**TATGCTGCTTCTTCGTC**TTTG**GAGGCTCTATGCGTC**TTTG**T**TTTA**TTCTTT**T**  
**TC**TATTGCTATCTCC**TTTA**ATCTCCGAAGCTTCGCAGCGCATTATTACTGT**GAAA**ACTATTTCATGAGATT  
GCTT**CAAA**CATCTTGTATGATGATG**CAAA**TTACTGGCTGATC**TTTG**ATATCGATGACGT**TTTG**TTGAGG  
GAGCTGAAGCTCTCAGCCATTCAGCTTGG**TTTG**AACGCTCCATACAAGGAATGCGGGCATTAGGAACATC  
CGAGCAAGAAGCTTGGGACACTCTATATCCTGATTGGCTATCTATTCAACGTCAAGGCTCTAT**TAAA**CAG  
ATAG**GAAA**CTGCTATTCTCTATTAATTAC**CAAA**GTTCAGAAT**CAAA**A**CAAA**ATCGTC**TTTG**CCTATTTCAG  
AGCG**CAAA**GTATGCGCGCAAGATGTGACATTAGAACAACCTTGCTAAGATTAACCTCTCT**TTTG**A**GAAA**GC  
GAATCTTCCCTATAACAGTCTCCCAT**CAAA**CATCTG**TTTC**CA**CAAA**AGGCGTTCTT**TTTG**GATCT**GAAA**TT  
CA**TAAA**GGACCTGGATTACAACA**TTTC**CTAGACGCCCAACCCTC**TTTA**CCAGAG**GAAA**GTCTATCTACATTG  
ACAATGAG**GAAA**TACAATGTCTTACGTATTGGAGAAGTCTGT**TAAA****CAAA**AAAACATCCCTTATCTAGGGAT  
TG**TTTA**TACTGCCTC**TAAA**TATCATCCCCAA**TTTA**TCTTCCAGATATTGCCAGAATACAATACCTATAC  
CGC**CAAA**AGCTCATTAGCAACGAAGCCGCAGCACTCTTATCTCGTCACAGGCTAGATAAGTAATTCCTT  
**TTTG**A**GAAA**GT**TAAA**CTCTGG**CAAAAA**AATCTTT**TTTC**CACTACACGGGTG**GAAA**AGCT**TTTA**TTAGAG  
GTTGTTGTGTCCTTCCGTTCGGT**TTTA**CTGACTGCTCTGCTCTCC**TTTC**T**TTTA**CGACCACCATGCAGG  
CTGCACACCATCACTATCACCGCTACACAGAT**TAAA**CTGCACAGAG**CAAA**ACCAT**TAAA**AAAGACCTCATCTC  
TCC**CAAA**CCTACCGAACAAAGAGGCGTGCAATACTCCTTCCCTTAGTAAGGAATTAATCCCTCTATCAGAA  
**CAAA**GAGGCCT**TTTA**TCCCCCATCTATGAC**TTTATTT**C**GGAAC**GCC**TTTG**C**TTAC**ACGGAG**TTTC**TGTTA  
**GAAA**TCTCAAGCAAGCGC**TAAA**AAATCTCTGCAGGAACC**CAAA**TTGCACTGGATTGGTCTATTCTCCCTCA  
ATGGTTCAATCCTCGGGTCTCTCATGCCCTAAGC**TTTC**TATCCGAGAC**TTTG**GGTATAGCGCACAC**CAA**  
**A**CTGTTACCGAAGCCACTCCTCCTTGGCTGG**CAAA**ACTGC**TTTA**AATCCATCTGCGGCCGTTACTATCTATG  
ATTCCCTCATATGG**GAAA**GGGGT**TTTCAAA**TATCCTATAACCCTTGTC**CACT**ATTGGAGAGAGAATGCTGC  
GACTGCTGGCGATGCTATGATGCTCGCAGGGAGTATCAATGATTATCCCTCTCGTCAGAACAT**TTTC**TCT  
CAG**TTTAC****TTTC**TCC**CAAA**ACTTCC**CAAA**TGAACGGGTGAGTCTGACAATTGGTCAGTACTCACTCTATG  
CAATAGACCGAACATTATAACAATAACGATCAACAACCTTGGATTCAATTAGTTACGCATTATCA**CAAA**ATCC  
AACAGCAACTTATTCCTCTGGAAGTCTTGGAGCTTACCTACAAGTCGCTCCTACCGCAAGCACAGTCTT  
**CAAA**TAGGAT**TTTC**AAGACGCTTATAATATCTCCGATCCTCTAT**CAAA**TGGAGTAACCTTA**CAAA**AAATA  
GATACAAT**TTTC**ACGGT**TTTG**CTTCC**TGGG**CTCCCCGCTGTTGCTTAGGATCTGGCCAGTACTCCGTGCT  
TC**TTTA**TGTGACTAGACAAGTTCCAGAACAGATGGAA**CAAA**CAATGGGATGGTCAGTCAATGCGAGTCAA  
TACATATCTTC**TAAA**CTGTATGTG**TTTG**GAAAGATACAGCGGTGTTACAGGACATGTGTTCCCGATTAAAC  
GCAGTATTCAATGCGGTATGGTCTCTG**CAAA**TTTATTTAACC**TAAC**CCACAAGA**TTTATTTG**GAATTGC  
TTGCGCATTCATAATGTACACCTCTCTGCTTCTC**CAAA**TGCT**TAAA**A**GAAA**ATAC**GAAA**CTGTAATCGAA  
GGG**TTTG**CAACTATCGGTGCGGCCCTATC**TTTCTTT**C**GCTCC**AGACTTCCAACCTACCTCTACCCAG  
CTCTTCGTC**CAAA****CAAA**CAATCTGCCCGT**TTTA**TAGCGTGCAGCTAA**TTTA**GCTATCTAATCTGTAGA  
TTAGCA**CAAAA**ACGCTTGCATCCTTGTGGTTAACCA**TTTAC**CAA**CAAAA**AGGAGGCCCTATGCCTTACG  
GAACTCGTTATCCTACATTGGCT**TTTC**ACACAGGAGGCGTTGGCGAGTCCGATGATGGCATGCCGCTCA  
ACC**TTTC**G**GAAA**CATCTGTTATGATTCAGCCTTATTACAAG**CAAA**AATC**GAAA**ACTTCAATATCGTCCCC  
TACACCTCTGT**TTTG**CC**TAAA**GAATTATTCG**GAAA**TATCCTTCTGTGGATCAATGT**CAAAA**ATCTTT**CA**  
**AA**CATGGTGTGCTGATTAGAAGTCATCATGGCAGGAAGAGGTGCTACAGTCACAGATGGCACACAAGCAAT  
AGCTACAGGAGTAGGCA**TTTG**TTGGGG**GAAA**GA**TAAA**AATGGAGAGCTCATCGGGGGCTGGGCAGCAGAA  
TACGTAGAGTT**TTTC**CCA**ACTTAAA**TCGATGAT**GAAA**TCGCAGAATCTCACGC**TAAA**ATGTGGT**TAAAA**  
AATCCCTTACAGCATGAATTAGATCTTCGATCCGTAAGTAAGCATAGTGAGTTCCAATA**TTTC**CATAACTA  
CATCAACATCA**GAAA**GAAAT**TTTG**GTT**TTTG**CTTAACAGCTCTCGG**TTTCTTAAA**TT**TTTC**G**AAA**ATGCAGCG  
CCTGCTGTTATCCAATA**GAAA**AGGAGGCT**TTTA**TGTTAT**TAAA**G**AAA**CGGTCTCCTACTAGCAT**TTTAG**  
GAACCTTAGCTCTTACTGGAATCGTGATCAGCTACATGATCGGAGGAGGTATT**TTTA**GTCTTCT**CAAAA**  
TATGGCGGCCTCTGCAAGTGCGGGGCGGT**CAAT**GTAGCGTGGATGC**TTTC**CGGAATCGGAATAT**TTTT**  
**ATAG****CAAA**CACC**TTTAAA**ACAC**TTTC**TATTATCCGCCCTGACT**TAAA**AGCTGGTATCTATACTTACAGTA  
GAGAAGGA**TTTG**GTCC**TTAT**GT**CGGA****TTTACA**ATAGCTTGGGGATATTGGC**TTTG**CC**CAAA**TT**TTTC**GGAA  
TGTCGGCTATGCCGTAATTACCATGGATGCCCTTAACTA**TTTC**TTCCACCATAC**TTTG**CTGGAG**GAAA**C  
ACAATCCGGCCATCTTATTAGGATCACTATTGA**TTTG**GATATTCAATTACATTGTCTTACGAGGTATCC  
GCCAGGCTAGC**TTTG**T**TAA**CATTATTGGCGTAGTCTGCAGGTTAATCCC**TTTG**CTCCTA**TTTA**TTCTCAT  
CACAGCTCGATT**TTTA**AGT**TTTC**GATC**TTTAAA**ACTGACT**TTTG**GGGACTGCTCCGCAACATACACTA

GGATCTATCGGATCTCAAC TAAA GAGCACGATGTTAGTCACTC TTTGGGCC TTTA TAGGAATCGAAGGAG  
CTGTAGTAA TTTCTGGCAGAGCTGCTAATCCCTCCTCTGTTGG GAAAGCCACTATCTTAGGAT TTTCAGG  
ATGCCTACTCATATATGTCCTGC TTTCACTGCTTCCCT TTTGGTTCCCTA TTTCACTATCAACTAG CAAAA  
ATAGCCGATCCTTCTACTGCTGGGGTACTGAACATTTCTGGTAGG GAAATGGGGAGAAGTCTTATGAATA  
CAGGACTATTAATAGCCGTCTTAACCAGCTGGTTATCCTGGACAATCCTTGCTTCT GAAATTCCTTACGC  
TGCAGCTAAGAATGGAACATTCCCAGAATGT TTTGCCATCGAGAATAG CAAA CACGCCCTTCTT TTTCC  
CTATTCATGACAAGTGGGTAAATGCAGATTACCATGCTACTAGTATA TTTCTCTTCTAATGCATGGAATA  
CAATGTTA GAAATCACTGGCGTTATGGTTCTTCTGCTTATCTAACTAGTTCCCT TTTCTTTGT GAAATT  
TAGTCTAAGTAAGAAGTATCC CAAA CAGGCCGCTAT CAAA GCTCGCATTTGCGATGATCACC GGCTATTG  
GGCTCACTGTACTCTCTATGGCTGATCTATGCTGGAGGATTGCAACATCTA TTTA TGGTCGCTATCCTAC  
TTGC TTTAGGGATTCCAT TTTA CGTAGATT CAGGAATCAGACA TAAA CAAGAAAAAAC TTTCTTGAATCG  
TAAAGAAA TCCCT GAAATGACGATCATGGCTCTTGGGCTCTACTCGCTATATT TTTA TTTCTCTGCTAAT  
AAAATCCATTTGTAGAGAGAGC TTTAAGTGCCCGTCG TTTAAT TTTCTTATCT TTTCAAAAGGAAC TGGT  
TCTT TTTCAAA GAGAATCAGTTC TTTCTATTCT TTTAAAATCCTCTTCTCTTATCCTCAATAG TAAA GCCG  
AAT CAAA CTTCT TAAAAAATCTTTT TTTCACT TTTAAGGTATT TTTA TGCACATAGCGGTT TTTGGAGCG  
GGATACGCAGGATTATCTGTGACTTGGCATCTTCTCC TTTA TACACAAGGACGAATTAGCGTTGATCTCT  
TTGACCCAACCCCTATTGGATCTGGAGCCTCAGGCCTATCTTCTGGCCTTCTTCATGGC TTTACAGGGAA  
AAAAAGCTATCAAGCCTCCGCTAG CAAA TCTAGGGATCACCACAACCATTCTCTCATTAC CAAA GCGAGC  
C TTTCTATAGGGGAGCCCATCGTGACATCCAATGGGATCCTCCGTCCTGCAGCCTCTCAGGAACAGGCCA  
CTAT TTTCATG CAAA GAGCACAGGAGTTCCCGAT GAAACGGAGTGGTGGGA TAAA GCTCGGTGT GAAAT  
TACAGTTCCTGGAATGGTCATTGCCGATGGACTCGGAGCC TTTACAT TAAA CATGGGGTAACCATTGAT  
AATGA TAAA ATATATCAGCGG TTTA TGGAAATGCTGTGCTAGCCTTGAACACAATATTACGATGAGCTGA  
TCGATGACAT TTTCACTGCAATCGCTGAGT TTTA TGATCACATTATTGTAACCTCTGGAGCGAACGCAGATAT  
TCTCCCTGAGCT TAAA CACCTTCCCTATCT TAAA G TAAAAGGTCAGCTCGTAG GAAAT TGGCTTGGCCAGCT  
GAGATCCCTATGCCACCATT CAGCATCAATGGCCC TAAA ATATATGGTTGCTGATACAACAAGAAA TACTT  
GTATATTGGGAGCAAC TTTCTGAGCACAACCAACCAGATGCCACTCCAGATGCTCAAGTTGCCATATCAGGA  
AATCATGCCTCCGATCCTAGCTCT TTTCCCTGGGCT TAAA GACGCTCAAGTCTTAATTATTACGCTGGT  
ATGCGCTCATCGAGCCCACCCAT TTTACCCATGATCAGTCGCGTACAA GAAAAAATTGTGGTAT TTTA GGAG  
G TTTGGGATC CAAA GGTCTTCTATACCATGGGCT TTTA GGAGATATGCTCGCCAGGCTCTATTACGGGA  
TTCCACGGCATATATAGCTAAGGAG TTTCTCTACACTCCAGAGGGAGCAGCCTAACTCTCCCTCTCTTC  
T TAAA AAAGAGAGGAGCCTTT TTTCTTTA CAAA GATACGCTAGCTT TTTCTCTGAAGAATCTCATCAAGAG  
ATAT TTTGCAT TTTCCACGGATAAA GGCATCCCAAGGAAGCCCTGGAATCACTTCATATTCTCCCGTTGC  
TAGCATTCGACAAGG GAAAC CAAA GAT TAAA TCTTCCGGTAATCCATAGGGATTGTGGTCCGAACACACT  
CCGGAA GAAA ACCATTCTCCTTCT TTTGGCTGATATATTGATCGAGCAGCCTCTGC TAAAGCTCGTGCTG  
CAGAAGCTGCCGAAGACTTCCCTCGTGCTTCAATTACTGCACTACCACGACTCTGTACAGAAGGCACCAT  
AATATTCTCTAACCAATCACGATCCGCTATCGTCTCTGCGATAGGACGGTCATTAATCAGAGCTTGGCTA  
AAATCAGGCACTTG TTTGGCGGAGTGAT TTTCC CAAA CCACAACCTGTGATACAGCCGATAAA GGTACTT  
CTGCTCTATGCGATAACATGCTATGCATACGATTCTGGTCCAATCGTAGCATCGCAT GAAAGTCT TTTCT  
CAATAATCTGGGAGCATGATT CATTTGCTATCCAGCAATTGGTATTCACAGGGTTCCCAACAA CAAA AATC  
TTTG CATCCCCTGGCTGTTGTGTT CAAAGCT TTTCTTGGCTAGCAACAATCTCCCATTT TTTCTTTA  
GAAGATCTTCTCTCCATTCTGGGCTCTAGGAAC TACCCTATAAGGAATGCCGCATCAATGCCATC  
AAA AGCATCATGCAATGATGTGCTTACCTGCACACGCTGTAATAGAGG GAAAGCACCATCATCTAGCTCC  
ATGCGCACACCAGA TAAAGCCC TTTCTGTTCCAGGAATATCGTAGATACGCAGATCGATGCCACAATCAA  
GGC CAAA AACATCTCCATGAGCCAGAGAAAATA GAAA GCTATAGGCTA TTTGCCCTGTTCTCTCTGTTAC  
TGCTACACTCACTG TTTGAGAAA CCATAAGCCACCCTCTCT TTTA CT TTTACAAA ACGCACATACTCTCAA  
CACTACG TTTGCAACTAATAAT TTTGGTCCCAACATACG TTTGGATGATAAAA AGAATCAAGTACCTAGA  
TTCCCTTAG TAAA AGCT TTTGG CAAA AAAAAGCTCATCTATT TTTCAATAGATGAGCCGACT TTTA ACTGAT  
AAGAAC TTAGAAA AC TTTATAAAA AAATAGGCCGCTGTGATCCTACCATATACTTGTATCCCGACCGCATA  
ACTTGTGTGCTCCTT TTTAGCAGC CAAA TAACCGTGGACATC TAAA AAACCAA TAAA CCGTGGCGGAATAA  
AGAACATACAGCCCC TAAAAAAACGAT TTTAAGAGAGAAGTGATAGACAGATTATAACATATTTAAAATA  
AAA ACTCTG CAAA CAAA AAAAC TTTGCCCTGGCCGCTCCTCGTAGAAA GCACCTTTA TGT TAAAACGT TAAA  
AGTCTTAACACACCTCGAGCTTCGG GAAA CTCTACAGGAGCATTCCTCCGACATGATGCCTATAA TTTGCG  
TTGCCAATTCTTTCCCTAAT GAAA CCCCTTCTTGGT CAAAAGAATTGATTCCCCAG CAAAACCTT GAAA

TGCAAATTTATGCTCATAAAAAGCCAAATAAACTACCAGCAATACGAGGAGAAA GCTGTTGCGCTACCAAT  
ATCGAAGAAGGACTGTTCCCTTTTAAACCTCTTATTCGGGTTTCGCATTATCTCTACCCTGAGCTAAAGCTA  
AAGATTGAGCAACAAGGTTTGCAAAAGAGCTTTTGAGATGATGAGCTTCCTGATAATACACAATCTAGCCC  
TCGTTGGTTATGCAAAATCCAATGAACCTCTACGGGAACAATATCTGTTCCCTTGATGAAGACTTTGGAAA  
AAAGAATGCTGACAGTTTGTCCCCACATCGCCC CAAATAATGGGTGAAGTCC TAAACTAATCTCCTTCC  
CTTCTCTCGAAA TACTTTTTCATTGGATTCCATTCCACACTGTTGTAAATGCGCTGTAAAAATA TTTCAA  
TCCTGTCAATAAGGAATCACTGCTGTTGTAGGATACCCTAACAGATTACGATTC CAAACTCCAAGCATC  
GCAGATAGAAGAGGAAGATTCTCTCTCATT TTTG GAGTCAGCGCATGAGCATCGATAGCAGCTGCTCCTT  
GCAAAA AACTCTA TAAAGCTTCGTAACC GAAAG CAAA ACCTAATACAACCTCCTCCTACCATGGATGTAGC  
TGAAAATCTTCCGCCAATACTATCC CAAAGATGGAATACTTCTAGATAACGACTCTTATCATCCATAGGG  
CTGCCTTGAGAAGTTACCGCTA CAAATGCTCTGCAATAGATAAA CTTTAT TTTGATAAGCCTGTCTGA  
ACAGTTCTTCA TTTGCTGCAGGCTC TAAAGTTGTTCTGACTTAGAAA CCAACAACCCAGTG TTTGCTC  
CAAA TCTATCTCCCGTAATACTTCTGCAGCATTATCCGGATCAATATTGGAGA CAAA AAAGATTCTCTTA  
TCAGATGGGCAAGAGCCTTGATAG CAAA ATACATAGCTTTTAGGGCCCAACTCCGAGCCCCCAATACCTA  
TCTGTACAAGCGTA GAAAATTTAGCAGCAGCTATATACAGAAA CTCTGCAAGACGAAGAGCTTCTCCTT  
AGAGTGTCTTGCTATCGCAGCAGCTTCTTCATGAAGATCTTGATCTCGAACCCAAGCGGTGTTGCCGTA  
TGCAATACAGGGCGAGATTGCTCT GAAAACCTTCTATACGATTCATGATGGCGCCTTGTGTCATACACT  
CCATCTG TTTGATCAATTCCTCTCTTTCAGTAAGTCCCTTG TAAA GCCTCTAAGCAGCGATCATCTACAG  
TTCCGTAGCATAACTATAGG TAAA TCCTTCTACAGA TAAAGAGTT TTTCTGAATACGCTCTTCAGATAAG  
CATCCTGATGCAGT CAAATCAATCGGATG CAAA GCCATCTCTTG CAAAGCAACTAATGACTCACAATCTA  
AAAAACC TTTA ACCCATCATGATTCTCCT TTTGAG GAAATGTGATACGAGAGACCTTC TTTCTTTTACTT  
GTACTATCTTTCTGTATCTTTCTCGGATTCCATT TTTGTAGAACAATCGATCT TTTCTATCTATTACTCTAC  
AATGTACTCCGAATATCT TTTCTG TAAATTTGTTCTGGTAGAAA GGCCTTAACCTATTAG TAAATCGT TTTCA  
TAATAATGTGAGATGACTAAGCCGGCATCACACAATCTGTAAA CAATCCGTATTCTTGTAAAGGAAGAT  
G TAAA GTCGCTTGAGGATACTCCTCTTGTACCATGTCCTCCATGGAGCGTAATAACTCTCGAATACCTTC  
TCCTGT TTTAGCAGAGACACATACGGGGTTAGGTGACATCAGCCGCAATCGAGAAGCAGTTACTCCATCA  
GCAACCTTATCCAT TTTATTCAATACTGTAATTACTTTGAGGCTGAGTGATTCCCTAACTCCTG CAAA ATAG  
CCTTTG TAGTCTCAACATGTTCCAATGCAAGTGGATGAGAAGCATCTACTACATGTAA TAAA ATATCCTC  
TTGTAATGCAGCTCTAGAGTACT TTTAAATGCCGCAAC CAAAGTATGCGGAAG TTTGCGAATAAA GCCT  
ACTGTGTCGGTCAATAACACTCGCTGACCACAAGG CAAAACACAGCGTCCGAGT TTTAGGATCTAATGTCTG  
CAAA CAGCTTATTCTCTGCATAGGTATCTGCTGATGTCAGTAAG TTTAACAGAGTACTTT TTTCTGAATT  
TGTATAACCAATCAATG CAAAGGTAGGAATCTGATTACGTTTT TTTCTGCTTTACGACGCTCTTCCGTTGA  
CGTCTACATTT TTTAGATCTCTAGATAG TTTATGTATCCGCTCCCGAACAATCTTCCGTTAATTCAA  
TCTGCTTCTCTCCCTCTCCCTTGA CAAAACCTCCACCCTACCTCCTGAT TTTCTGTCTAGAAA GATGCCC  
CCACATACG TTTGAGTCGTGGTAA TAAA TAACGCGCTTGCAGGCTCTACCTGTAATCCAGCTTCAGCA  
GTGAGAGCTCGACTCG CAAAAA TTTCTAAAATTAATCTGTACGATCTAATAACAACAACAGTAATCGTT  
TTTCTAAGTTCC TTTGCTGGGAGGGAGATATCTCTTCATCAATTAG CAAAGTCCCAATAGTAG GAAA TTC  
TTCTAAA ATCT TTTCTGATTTCTCTAA TTTCCCTTCA TTTAAATAAAA ATGAAGAAGAAGGAGCTCT TAAA  
AGCCATGTACAAGTCTCAAGCACACTAAGATCACAGGAATTGCGAAGAAA TGAGTCTCTCAACATACT  
CAGAAA CACGATCCTGCTCTGCACGATTTGTATAACA CAAA CAGC TAAAGCTTGCGCAGGATCTTGTTCT  
CTCTCTAGGAAG CAAA AACCTCCAACCTATTGCAC TTTGCCGCTCT TTTCTTCCCATCTCGATTATCT TTTCT  
TTCA TTTCTTTTCTTCCTTATGTCCA TAAAAGCTCCATGCCATCGTATGCACACTCTCGTGTAACATCCT  
TTTCCAAA ACTTTG TGAAGATAGTGACTCACATGTGTAATCACTAGACGAGAAGCTCCACCT TTTCTCAT  
TAGAAGATCCGCTTGTCTAAGGT TAAATGCGAAGGCGTCCGTGATC CAAAAGC TTTAGG CAAA ACTCCT  
AGGGAAGCTGACACAATGATCGTGTCACTCCTTGTAGATAATCTACAATCTGCTCATCGTAATGAGACA  
TATCCGT TAAA TAAGC TAAATCCC CAAAACGATAGCCCGTTACCTGACAATTCT TTTGAAA ATAG GAAA C  
GTATG TAAACGGAATACCTAAGAACTCTTGTCTCCGCA TTTCTCA TTTAAA ATAGTATAGCG CAAA GAA  
GCCGC TAAA ACTGTTATTAGGAGTCTC TTTCTGAACAAGATGCTCCTTAGT TTTA CATAGATAGTCATATG  
TAAA TGAT GAAA GAATAATCGGAACTGATTCTAGATGCGTGATATACCAAGAACGGAGATCATCGATCCC  
TCCAATATGATCATAATGAGGATGAGTAA GAAA TACACCATC CAAA CGAGGAACACGGTATCGCAATAGC  
TGTGTTCTAAGATCTGGACCTGTATCAATGATAAAA GTTT TTTCTCCTGACTCTGAACCCACACGGAGGAAC  
GCAGACGACATATTCTGCCTTGCGAACATACCTCACAGAACAGAAGGGCACAGGGATTCTTCCGGATC  
TCCTGTGCC TAAA AAAACAATCTTCCCCGAACAAGATG TTTCTTCCATAATAAGGCCTCTTAATCGT TTT

CTAAAATTAGTTGTTCAAACCCCACTTCTGTTCCTCAACTCTGCTAGCACTCCTTCTTTTCGGATCTCTTGC  
ACAGCTGCCTCGATTTTCCAAGGC TAAAGCTGGTCTGATCTGAAGCAACGCCAATCCCGTATCC TAAAACCC  
ACTGATCTTCAGGAAGATCTATGGTTGCTGTAGAAAAGAGCCGGGAATCTTTTCAAGACAACCTTGAGCGAT  
AGATGGCTCTAAAACAGCGACGGGAGATTTTACCATGCATGACTTCCATGAGTACTTCTAGAGTGCTATCA  
AAAGAGCGAATATGAACTTCA GAAAAGAGACTGTAAA TAGGCCTCTTGATAGGTTCCCTGTTTG AACAGCTA  
CAGAACGATATTGAGTGAGTGGCAATGGATGCTTATTCTCTCC TTTAAACAC TAAAACCAAGTGT TTTAT  
TTCCTCCCATAGTAGGGAATCATAAGAA TTTCTTCAATCTAGAAGGAGTAATGGACATCCCTGTTATG  
ACCGCATCAATCCGATGCTGT TTTAGGTTTGAATGAGTGCAT CAAAGGAAA ACTCCCGAACGTCAAGCG  
T TTTCCCCAGCTTGTTACTAATCTCTCTAGCCAAGTCTATATCGAAGCCTACAACCTCTCCTCGCTTATC  
AACAAA CT CAAAAGGAGGGTAGGTTGCATTAGTCCCTACAATAAA TT TTTTACTATTGGAGTCTCCCCCT  
TCT TTTAAA CAACCCGT CAAACAAA AACTACAGACAACCTGC TAAA AAAGCTATCCATGTTTTT TTTCTT  
TTA TGCACATACTCACTCCGACTCAATGGTCTAACGACAGGGACTATACCCAGCATGATTCT TAAA AAAA  
ATAAGAATCTATA CAAA AACTGCTCTGT TTTCTAAGGAGCCAATCTCTTGAACC CAAAGCCCTAACTCTT  
CGAGTTCACAAGGAAGAATATGTTGTGATCCATCACA TAAAGCTAGTTCAGGATGCTCATGGACTTCAAT  
CATCAGTCCATCTGCTCC TAAAGCTATTGCAGCACGAGCTAATGGTAACAC TAAA TCTCGTCTTCCTGAT  
GCGTGAGAAGGATCCACGATCACAGG TAAAGAAG TTTCTTCTTAATCCATGCGACAGTATTCAGATCCA  
ATGTATATCGAGTAGTTG TTTCAAAA AGTACGAATCCCTCTCTCA CAAA GAATAACTCCAGGACAAC TAGC  
ATGCTGTAA CAAA TATTCTGCAGCAGACAACCATTTCT GAAA TTGTAGCTGAAGGA TTTCTT TTTAAAATA  
ACCGGACGATGAC TTTGTCCTACTTCATCTAGCAAGA CAAAAT TTTGCATATTGCGAGCCCTACTCGTA  
AAAGATCTACATGCTCTGCTGTAA TTTCCACATCACGAACATC TAAA ACTTCTGTCTCCGTCAATAATCC  
ATGAACAGCTTTTGCTCGCTATGCCACACTACGTGATCGGGAGGCCAACCTT GAAAAGAATGCGGGTTC  
GTTCTTGCTTACGAATAGACCCTC GAAA AATATGCGCTCCAGCACT TTTAACCTGTAGCCC TAAAGTAA  
TTGCATGTTCTTGGC TTTCCAAGGTACATGGACCAGCAATAATGATAGGAGTCCCTCCACCTATAGACAC  
GG TTTCCGATAAAA CGAATAACGGGACTCCTATTCTGAAT TAAA TACATGAGGTAGCGGGACCCGTTTT TTT  
CCCATTAGATTTGT TTTCTTGT TTTCTTCTTAACTCATGAACAG CAAATCATAACACAGGGAAGAGA  
AAAGAAA TAGAAA GATT TTTCAAT GAAAAAAACGCCCTCTTCTCTTGAAGAGAAGAGAACGTTTAA TGAT  
GCTATTCTGATCCGTTAGACAACCTG TTTAATATCA GAAAT TACATCTATCAGCGTCTGAAGAAAAGCTTG  
AAATAGCGCCTCATCAGCATATTCATCTCTTCC TTTGAGTAGTTTCTACAATAA CAAAGCAAAC TACAA  
GTTAAA CACATAACGCCTTGTATAAAA GAATAATCTACATTTTTGT TTTTAGCATAT TTTCTCACAAA ACAC  
AATAG TTTCTATTA TAAA ACT TAAA CAAATAGATCT TAAAAAATAAAAAT TAAA TTCAAATGAAAACAATT  
TAATTTAAAACCAT TAAATTCATTGAAGACA AAGAAA AACTTTTGTTAAAATTT TTTCTGCTATACCGCAA  
AATGATTGCGAGGCTCT TAAAAGCAATGTTCCGATCTATCCCTGTTATCCCGGATACAACAATATTCCT  
GCATACAGTAACAGTACTTCTACTGTACACTGTGTGATGGCGTTGTATCACCTACCAACGTGGATATTG  
CTATTGTTGTACCTAA CAAA CCCACAGCTCACTCAGAATC CAAA CTGTCTGT TTTACGCTGT TAAA ACCA  
TCCTGT TAAAGGTCTGCACTCTGGTGGTCCAATTACTTCT TTTAAGAGGTCTGATCCCCTTTTATCCCCT  
CTGTTAGAAGAAA CTACCA GAAA ATGCTGAACCTCTGCGCTCGTGTTCATTGCC TAGACGTACTGACTG  
TATGCAGCACTTTGATAGCATCTCTCCTTGCTATTACTGGAGCTATCCTACAGTTCATAGTCGCAGCGCC  
AATCCCACCTTTATTTCCCTTGATCCTA TTTGCGGTGGCAATAGCCTTCTA TTTAGGAGCTTTCTTGTGC  
ACTCGGATCTCT CAAA AAGATACTCTGCGCTGGCAAGCTCT TTTCTAAA AACATCATCCGTTCTTCCCACA  
ACGTCCCTGTTACAGGCTGGGACGGAACGTTACACGCTACTTACGGAATTCCTCCAACCTGTTAT GAAA  
CCATTCATTGATCTGTATTCCATACGCCCAAGTTCATGGTGTGCTCCAAGGGTAGTTGT GAAA AAAACT  
GCGTG TAAACTTTCTGCGGCATA CAAAAAATCTT GAAA AACCAGCGCGGCCACTAGCTATTGATCCCTA  
TTTGAATAAGGCGAATACAGCTCCTGCAGCTGCCGATTG TAAA GAGGCCGCTTCTGCAGACAACGCTCT  
CT TAAA AAACATGTAGCGATTCTAT TTTCTGAATAAGCAATTGCTTCCAAGATAGTCAACTTGTCTTGCC  
AGCGACTATGTGGATA TAAACTGATCACTGCATGCAACCCAGCTTCTCCTCCTTCGCGTTG CAAA AAAAGA  
AAGAGCTTTCTCTAAGG CAAACG CAAA ACTCTCTTCTTGTAATGGTTCAA CAAA ATCCTCGCTATCCCCT  
TCTTCC CAAAAGACTTCAGAACA GAAA CTCCATCCCACCTGCTGCCCTGC TAAA TACTGAGCGACAACCA  
TT TTTGCTTTGCTGTACTGAGCTGCAACTAA TAAA CGAATGATCTTCTTCGC CAAA TCCCT TTTCTATGAT  
TTC TACCTGCAGAGGAGATGAAGCTA CAAA AATCTTCTGATCTTCA CAAA AACTGTTCAATAGCTCGA  
CAGGGCTCTATTCTATGCA TAAA AGAAGCAACAACATCTCCAGCTTCTTCTACCTTCTCTCGACTTACCA  
AAAGCGC GAAA GCAAGATTCCTCGAGAACGCATTCCTTGACT TTTGATAAAA AACGTCCAGC TAAATG  
AACTCCATGAATCCCTAATGAGCAGACCGCTTCTGAGGCAGCTTCA CAAAGGATGCTGGAAGTAGCTGAT  
AAA CCTTCTGTAAGCTTATCTTCTCC GAAAGGATCTCCCTC TAAA TAGAGAATGGCTGCAGCTTGCATCT

GAACACGAGCAGAAA GTGAATTACAAGCTAACTTTTGAACCGATTCATTATAGAAGATGACCGGAATAC  
TCTACCTCCTCTCAGAATGATCTGTAAAGTAGCTACCTGCACTTCTGGATGATCTGCAGCCAATAATGTA  
CGAATCTGTTCTTCCGTACACTTTTCAGGATATTCCTTTAAACATCTCACAGGTCATTAAGCTTGATCTA  
TGCCAGTTAATACACCCTATGAGGCCGAGTAAGAACACATAAAA GATCTCCAAGCTTCTCTTC TTTTCGT  
TCCATCTAATTGTGTATTTTGGACTACAACCTCGTAAATGAGGCACAAGATCTTGTATCTCCAACACGGCT  
GCAGCACGATAAGCAGTGATGCGTACTTGAATAGAAGAATCATTTTTCGCTAAA TCGCCACGGCGCGCA  
GTAAGCAACTAGAACCATAACAGCTACTTGTACAGCAATCTCACGTACGGTATCGCTATCATCAGA  
CAAA GCCTGCAAA ACAATAGGCACTAACCGATAGTCTCTCGCCATCCCTACAGCTAAA ATAGTAATTACT  
CGAACGGTAAGTGAAGAATGTCTAATATTTT TTTG TAGAAGAGAAGCTGCAAGATCCTCATGAATATCAC  
GATCTGCTTCCAATGAAGGAAA GCGTTCCTTGAGAACGGAGGAAGGCTCTCTCCAAGCAGAATATTCATG  
ATGTTTG GCTAAGGCTCGTAAA GCCAAGCGAGCTTCTAGTAAGGAACAATCGGAAGATAATGAGGTCTTA  
GCCTCTTGCGCTGCGGTACGATACTCA CAAA AACGCATTGCTTGTGGATGGAATTAGATCCATCCACAC  
AACACATAACGAGCAGATATACTATGCTATGGAGCCTAATAAGCCTCCACCAAGAAGATGAATGTGTAGG  
TGGAATACGCTCTGCCCCCTTCTAAGCCATTGTTGACAACAACGCGATACCCATTTTCTATCCC GAAAT  
TTC GAGCCATCAACTGAATAATCTTCCAGCTTCTGCAAGCAAGA GAAA ATCGTCGCCTTGTATATCCTG  
TAACTTCTCAATATGCTTCTTGGGAATAATGAG CAAA TGTACTGGAGCTTGAGGGAACCTTATCTTTAATC  
ACGATAAAA GTTTTC ATCCTCAAAA AACCCTTATCGCATTCACAGCTCCTTCTATAATGCGTT CAAA ATGG  
TAGTCATACTAATCTCTGCTGT TTTA ACAC TAAA TTCAGTGCTTCTTCAACTCTCTTGACTATCCCAT  
ACAGAAA GAAA TAGTCC TTTG TGACAAA AATAGCACCAGGAATTCCCGTAGCTTGAACCAACTGATCTC  
CAAGCAATCCTGCCACTCCTCAGG GAAA GGAATCCGGACTTCCATCCGGCGATC CAAA GTAGGTGGAAT  
GCCTCG CAAA ATCCATTGATCCGAGCAAGG GAAACTGAC CAAA AGCTGCCGGATGACTTTCTCCTCC CAAA  
GAGAAA AAATTTCTCCTGCCATGCTAACGGACGAT CAAATCG CAAACAAA CAC TTTCTTTTTC CATGACTT  
GTTTCA CAATATCACGACACACAGATCATAACAGA ACTTCTCTCG CAAACGAGTTAGTAAA TCGATTGC  
AAACCG TAAAG CAAAGAAA AATTC TTTGTCTGTATTTCTCCTTCTTC CAAA GGATTGTAGAT TTTGATA  
ATATCAGAGAAA GAACAGAAGCCTTC TTTAGAAA GAAACGTCCTTATCTTGCTCATCTACACCATGTA  
CTAACGTGTTATTTCAGATACTCGTACTCATCGTGAGAAA GAAA TCCAGACCATG CAAA TAATCCAGAAC  
CATCCCTGCGCTACTCCAAGATCCTGTGTAAGAAA CTTGGTGGTGATC GAAA CGTTATGCTCTGTAGAG  
TAGCGCCTCCTACATCACAGACGTA CTACATTGCGCCA ACTTTTG GGGATCTCTGGTACGAACGATTT  
TGTTCTCATCAACAAGAT CAAA CATGATCAATAAA GCGCAAGCCGTCACTTCATCTGCGT GAAA AGAACC  
ATCATGTGTGCCAACACTTCTTGAA TTTG CATTCTCATTATCCTCCGTGATCCCTCGACAATAGAACA  
ACAAA CAAA CCTCGGCCGGTAGTACCATATC CAAA AGCTGAAA ATCCTCCATCCTACTTGCAGTTTAGGA  
TTAATATCAAGCGTCCGCTGAAGGTAT TTTCTGTTTGAAGCCCTAGATCTTCTTTTACCTACATCATAT  
TTAAAA TAAATCC TTTACAAA GCTCGCATTAAAGCAGCATATAGCGTTC TTTAAA CTCTCTTTTAAAA  
TTTTTCTATAAGCTGGTCTTTCACACAGGAGATTCCAATGACGCTC TTTCA TTCTCATCATGATGCCG  
TCTCTCCAGACGGCTACCTATGTTCTTCCCTT CAGTTAGTTGGTACTGGCGTATACGAAGGAGAAA TCGA  
GATT CAAA ATATCCCTCTTATTTTC CTTGGATTCCAATTACCTCTCATTGCATACACCTTAA TTTAAAG  
AGCTCTCTAGCTCAATTAGGAATAGATGCCCTCCCTTCTTCACTGCGAATTGAG CAAA AATCAACATCGAG  
CACATATACATGCTCAA TTTACCGGTCATGGCCCATTTGCTGAATCTATGCTAGCCCTTCTCCAACCAGG  
AGATCGTGTAG CAAA ACTATTTG CTGCAGACGATCGCAGACTGGTCCGATCTCCAGATTACCTC GAAAGC  
ATGCTGAAA AATACAGATAAAAGCTGGCCATCC TTTG CTCTGT TTTGG GAAAAAATTAGAACACTTGATTT  
CTTTTGATGTGGTAGATGATCGCCTTGTGCTCTCCCTTCCCTACCTGCGGGGAGTTGTTGTTATGATTC  
GGATA TTTATGGACTCCTTCTCTTATT CAAA AATCACTTAGTAATCC CAAACTCAGCATTGCTCACTTT  
TTAGCTCTGTACCAACAGATTGTGGAAGGGCAACATGTCCTTGGCG GAAACCATATTTCTTCTGAT CAAA  
CAGAACCGCTGCACATCCGCACTGTA TTTGCTCGCGTGG TAAA TCAACTCCTCCCTCAAGGTCTCTCCCA  
CACTCTGCCAATAT TTTGGAACCAACCACTCGAGAATCCGGGGATATC TTTGAATTT TTTGGGAACCTT  
TCTGCACAGATAGAA GAATTCC TTTAGAATT TTTCACTATCGAACCTATAAAA GAACATTCTTACTTCT  
GTAATCGGGATTTA TTA CAAACCACCTTACAATCAGAAAGC GAAAT CAAAAAATATTC GAAA CAGCGCC  
CAAA GAACCTGT CAAAGCTGCCACCTA TTTAT CAAA AGGCAGT GAAA TCTCTTCCCTGCACACAGACTCT  
TGGCTCACAGGATCCGAGCTGCCATCAATATAGTGAGCAAGCAGATAAAA AACGAGTACACTCATGCTC  
AACCTTGCTATCC TTTCTTAGAAGCAATG GAAA TGGGCCTGATCAATAGCGAAGGAGCCTTACTCACTCG  
TTATTTTC CTTTCAGCTAGCT TAAA AGGAATGTTGA TTTCTACCATGTGCGCCACTATCTCAAA CAAA TC  
TAC TTTCAAGTTCCCTCTTATACACATG GAAA CTA TTTCTCTCATAATGACAGAGG TTTGCTATTAGATC  
TGCAGCAAGCAGATATGATGT TTTCTGGGCAGATGAA GAAA GCGGCCGCGTGTGCAATATA CAAA ACG

ACGCGATAAGAATAGCGGTATGTTCTGTGATCAAAAATCGTGTGAAGAGTTTCGATCAGCTTATTTTATT  
GCTATTTATGGCTCTCGTCTCCTTGAGAATAATTTCTCTGCTCAGCTCCATACCCCTCCTAGCGGGCTTAC  
AGCAAGCAGCACATACTCTTGGCATTCTGGATTCTCAAAGCCTACCCCACTTGCAGTCATCACCGGAGG  
CGGCACCTGGAGTTATGGCCACAGGAAATCGTGTAGCTAAAGAAGCTAGGAATCCTATCTTGTGGAACCGTT  
CTTGAATTAGAAGCTTCTCCAGCACAAATTGACCAACCTACCAATGAATTCTTAGATGCTAAAATGACAT  
ACCGCTACCTCAACTTATAGAAAAGCAAGAACACTTTTATGCAGACCTTCTATCCTTGTAGTTGGCGG  
TGTAGGAACCGATTTCGAACTCTACCTAGAACTTGTCTATCTCAAAACAGGAGCTAAAACACCGACTCCC  
ATTTTCCTAATTGGACCTATTGAATACTGGAAAGAAAAGTGGCCACGCCTACGAGATCAACCTCAAAG  
CAGGAACCATCCGTGGATCCGAATGGATCAGCAACTGCCTATATTGTATCACTTCTCCGGAAGCTGGAAT  
TGCCGTATTCGAAACAATTCCTAGCTGGAGAACTCCCTATAGGATACGACTATCCTCCAGCTCCAGATGGA  
TTAGTGATCGTCTAAAACAACAATTCCTTAGGATTTTCTTCTGTAGTGGAGGAAGATTCTGAGGAAA  
TTGCTCAAGTAAGAAGGCCTTTATAGATCTAGGCAAATAAACCTTTTCTACGAGAGGCCCTCTCCCGCT  
ATTAGAGTAACATCGCTTTTAGGAATAGATAAAAAAATTGCAAGTAATGCCACAACAGCATCATTGGCTT  
TACCTTTTCTGGAACTTCAGTTACCCGAACTCTTAATATACCATCTTCAAAACATACGACTCTATTCTC  
TCGCGCCTTTGTAGTGACCCTAACCTCAAAACCAAAAGCCTTCTAAAAAATATTCTCCTTCTCCTTA  
CTCAGGAGTTTAAAAAGAAACGCACCGTTTTTACGTTTCTCACACAATTAACCTAACCAACAAGCATA  
TCATTCTGGATTTCAATGCTCCTAAAATTCTTAGTCAAATCCGAAAGCCGACACTCGAGCGCTCTT  
CTCCAAAATCTTGTTTTCTCTGCTTCCGAGTTATAACGCGGCTGTCTCATAACCCACACTAACATG  
ATGAAACCTCTACGTTTCGGTTATTTCTTTTGCAGCAATCTATTTTACTTTGTTACAGGCAGCGTTTGCTA  
AAGAACCGAATTTCTGTCCCAGCTGCCAGAATAATTGGAAAGAACCTACACGGATCAACTCCCTGA  
AAACATCATTATGCTGATGATGCTTGTATCACTCTGGTTATGTACAGGCTCTCATTTGATATGCAATTT  
TTAGATAGCTGCTGCCAGGTCATCGTTGAAAACCAAACTGCTTACTTATTTTCTTCTACAGATGATG  
TTACGCGCAACGCCATTATCAACCTAATAAAGACCTTCCATTCATTCACTCCGTAAGAAATCTGCCAAGC  
ATCCCTATCAAACTGTCTATCATCAAGGCCCTCATGGAAAGACTTCTTCTCCAGAACAACGTTCTTTCTGT  
ACAAAGGTCTGTGGAAAGAAGCTATTTTGGTTACCACAGAATACCATCCTATTCTCGCCTCTTGTAGCAG  
ATCCTAGACAAGCAACTAATAGTGCAGGTATCCGTTTTAAACGACGAAGTCGTAGGAAACGTTGTTGGCTC  
TGCTACCTTCGGTGGAGATTTTATCTTCTTACGATTAATTTGATGCTCTCCGATTCATGGAGACATGGAT  
ATTGGTCTCCAAGGAGCTGTATTCTCTGTTTTCGACCTGGATCATCCAGAAGCTTGCATGGTCAACTCTG  
ACTTTTTTGTGCGCCGCTTTGTGCAACTTTGTCAGTGAACAAAATGGAGCTACCGCTTACACTATGGCATCT  
TTCTTCTCATCTTGGCGACGAATTTTATTCTTGGCAACCAGTTACCTCCAAAACGTTATAATCGAAGC  
GATGAAGCCGTCGATTTCTTTGCTTCTTTTCGTTACTCCACAGATCCGTGTTTATGGAGGTATTGGGT  
ATATCATTAGTCGAGATTCAACATTCCTGAAGATCCTTTTACTTTGAAGGAGGTATCGAACTACGTC  
TTTCGGATTACGGGAAGACAACCTTCATGCCAACCCGCTTTGCTATGCATTTTCGCTTTTGGAAGAG  
CATGACTTCTCTATAGACCAAACTTATATAGTAGGCATGGAGTGGTCAAAATTCAGGATGTAGGGAA  
AAGTGCAGCTGTATTGGAATACCACCAAGTTTCTCCACGAAGGACAATTTGTCCGAGAAGAATGCCA  
TTATTATGGCTTTCGATTAAGTTATGGCTTCTAGCTTTTCTCAGTGCTCTCTAAAATACGCTGGACAG  
ATGAGAGTCTCATCTTTATATTACCGTCCACCATTTGACTCTCCCGTGTTCATGGACTTTAGGTGGTT  
TATGAAAAGAAAACCTCACTTCGTATCATTAAAAAATTTATTTTCGAGATTTACAGAAGAGAGTC  
GCCCAATTTTCGTTTAGAAAATCCCCAACATACAGTTATTAATTTATCTATTGGAGATACCACCAACCAC  
TAAATGCTAGTGTGCTGAGGCTTTTGCCAGCTCTATTGCCCGTTTGAGCTCTCTACAACCTGTCCGG  
ATATGGACCAGACTTTTGACTACCTGCATTAAGCAAAAATTTATCGGAAGATTTCTATCGCGGCTGTGTT  
GATGCAAAAGAAAATTTTCATTTCCGGATGGAGCAAAAGCAGATCTCTCCGTTTACTATCCTTTTTGCTC  
CCAATCAACAGTGGCTATTCCAGGATCCTTCTATCCTGCATATCTCGATATCGCTCGCTAACAGGGGC  
AAAGGAAATTTATCGCTCTCCCTTGCTTGCAAGAAAATGCATTCTTCCAGAAATTTCCAGAGGACACTCAC  
ATCGATATTTATGTCTATGTTCTCCTAATAACCAACAGGGACTGTTTAAATAAAGACCAACTACGTG  
CGATCGTTTATTATGCAATAGAACACGAGATTCTCATTTTATTTGATGCAGCTTATAGCACCTTCAATTC  
CGATCCTTCTCTCCAAAAGTATATTTGAATTTCTGATGCACGGTTTGTGCAATAAAAATCAATTTCG  
TTCTCAAACTCTAGGATTTGTCAGGCATTCTTTAGGTTGGACCGTCATCCCTCAAGAATTGACTTATG  
CAGACGGCCATTTGTGATTCAAGACTGGGAACGCTTCCTTCAACCACTTTTAAATGGGGCTTCTATCCC  
CGCTCAAGAAGCTGGCGTTGCAGGATTTGTCATTTCTCCCTCAACTTGAAGCGATCCACTATTATCGAA  
AATAGCGACCTACTCAAAAAGCGCTATTGGCAACTGGAATTTGAAGTATTCCGGTGGGGAACACGCCCTT  
ATCTATGGGTCAAAACCACTCAAGCGAACATCTCTGATAGAGATCTTTTGGACTTTTCTTACGAGAGTA  
CCATATCGCAATTACGCCAGGAATTGGAATTTGGCCGTAGTGGTTCGGGATTTGTACGCTTCTCTCCTTA

GGGAAACGTGAAGACATATTAGCAGCCTGCGAACGTTTACAAATGGCTCCTGCTCTGCAATCATAAGGTT  
TGATAGCTTTTGC GAAATTTTGTGGCTATCTTTTTGTAGTTCCCTAGTTTGTCTTTATTTTCGTC  
TTGTTGTTTCCTTTTCGTTCAGAACCAATAACGCCTAGCATTGCTATCTTCTCTTCCCTTTTC  
TCTTAGTGAATGCATAGAGAGTTGTCAAAAAGAACTGACCAGCTTTTGGAACATGCCACTATCTCTCTA  
TTTAATGCTGAGGATAATGTAGTCAAAGCAA GAAA AATCGCTCGCACCCTTCA TAAAGACCCTAATGTTG  
TCATGATCATTACTTTAAGCCCCATTGCAACTAAA GTAATGAGTCAAATC GAAACA CAAAAACCGATCAT  
TTA TGCTGTTGTCCCTGCAGGAGAAGCTCTCCGATTCC CAAAAGAGCAGGTTAATATATACGGGGTTAAT  
GATAGCGTAGACA CAAACCAATGTTGTTTCGCGATTTCATGCGGTAACCAACAACGCGAATTCGTTGGTTT  
ATCTACAACCCACGAACCTTTCCTTCTTCCCTTACAGGAA GAAA TTA CAAATAAACTCCGCGCTCAGG  
CAT TAAAGTGACAGAACCTCCTA TTTCTGCAGCCAACATGTGCTCTCGCATTTCAGTTTATTGCA GAAAAT  
CGTCTTCCGCAGTCTTTTTCCTCTTTCTTCTTATCA GAAA AAAATGGGAACGACGCTCAT TAAAGCA  
TCT TAAAGAAA ATATTCCTCTGATCACAGATGACTCTTCCCTTGTTATGGAAGGTGCTTGTGCAGCATG  
TAGCGTTGATTATAAACTATCAGG CAAACAAA TAGCCTGTATCGTTCTGTTA TTTGCTCAGCAA GAAAAC  
AATGAAGAGCATTTTGAACCAGATTAGCGCAGAGCCGATCCTTTCCAAAATTACTTTCAATGAG GAAA TTA  
TCCGGTTCTTAGGACTTCCATTTAATATGGCTCCGGCTCACCAA TTTATCTCTTTTC CACTCTGCAGATAA  
TACTGGATTAGTGACTTTTACAAATCCCTTAATCCTACTAT TAAAATCCTCTATCATCATCG GAAACAGAT  
TCCGAATC TAAACTCTCATCTTGAGGCATAGAGAATAGAGTATCCTCTCCGGACAGAGCTCCCCATCCC  
GCAAGCGTCCCCTAGAGAACGAGGGTCTTCCACAGAAGGACTAGAACT TAAA TACGACGCGTAAGGGTT  
AATGAATGTGCCTGGACGCATGTAATAGTCTGTGTCTCAGACTCAACCTCTACCCTCCTCGATATCCAA  
TGAAAGAAACGCAAGATCTGGTAG TAAATGGCTCG CAAAGCACCCAT TAAATGCTCTTG CAAAACCTGAC  
AGGCTCTTCTTCTACAGAACAGCATGCCGTTACCTCCTCTTCAGAAGCTTGGTCATTAATGCT CAAAGG  
TCCGTCTCATG TAAACGTTCCGCAGAACGAGCTAAGTTGGAGATAGATTGATTAATAGAGCCGACCTCT  
CCGTTGGCTCGAAGTCTCCACTCCCC TTTCTCATTGACCTCTAATCCTAACTTATGTAAGCGAGCTAGAA  
CCGTATCGCTATCCTTACC TAAAATGGACTTGAGATCTTCTTGAGGAAGTGCACGAAGCGTTTATGTTAG  
TGTTG CAAAAGACCGGTTACTAGTCTGCGTGATGACGTATTCTCTAGCTAATCTTCTTAATGAATGT  
CGTTATGCGCAAGCCCATGACGAACAGAAA GGGAGCGGAGTCTCTGG TTTCTAGCTATCTCTTCTCGAT  
GAGAATTAGAACGATTCGTTCC TTTCCAGAGCGCTCTTA TTTCTTACCCAGGAGACTCTAGCTGCTCTTC  
ACTAGAA GAAATCGCTTGCAGTAGAGCTTCCATGTCTTTCATCCAG TTTCTGCACGTTTCGCGTCTCTTC  
TCCATTACATCCGCGATGATCTCAGCGACTTCAACCTCGCCAAGTCTCCTCCACACTTGGAGAAGATG  
CCATTGCATCCGACTGAATAATCGGAAGTGAAGCTGCTGAATATCTTCTGCAGAGGTAATCTTCCCTAC  
AGCAGG GAAAGAAA TAGTCTGACCAGAGGGTGTGACCCCTTCGGGATTCATCCCCTCGTTCTCCCTAGAA  
TTGGGAAGCCTCTCAGGAGAAGAACCAGATGTTCTTGTATAGAAGACATAGAGA TTTAAAAA CAAAATT  
TGCAAA AACGCT TAAATTAAT TTTAAGAAACAAACAAAAGAAA CATCAAGTTATTA GAAACAAA GAATC  
TGAAGTAGT TAAAATCCAATAAGAA CAAAAAATCACAGAGATTGATCTA GAAACACTCCTATGCTAAGA  
TGCTCTTCCACAC GAAA CAATATAAAA GCACCTTCCCTATGAGAACGTCCCTTCTGT TTTACAGA  
TCT CAAA AATGCAAATAAAGAAGCCTCCGTTCTTTCTACGAGCTTCTTCA GAAA GCAGGGTATCTTTTCA  
AAACATC TAAAGGGATT TACTCATAACACCTCTCTTCCAACGAGTTATCT TAAA AATGACC GAAATCAT  
TCGTGAAGAACTCAATGCTATTGGAGGACAAGAGGTCTGTCTCCCTCTCCTGCAACCAGCAGA  
GAAATAAACC GGTCGTTGGAAGGCC TTTATCTCG GAAA AATTACTCTATGTGCTTAAGGATAGA GAAAATA  
AGGCAATGTGTTA GCCCCTACCCACGAAGAGGTGTCTCTGAAATTCGTGGCTCAGTGGCTAACAGGACG  
AGAACAGCTCCCTATCCACCTATAC CAAATCGGAAC CAAATTCGAGAT GAAATCCGACCTCGCTTTG  
CTTATGCGTGC CAAA GAGTTCTTAATGGAAGATAGCTATACTTTTCTGACTCTCCAGAA CAAATGGAAG  
AACAGTATG CAAA GCTACGTCTAGCTTACCAGCGCATC TTTGATCGAT TAAATCT CAAATATGTAATGT  
TGCTGCAGATGGGGG GAAAATTGGTAAGGG GAAA TCTGAGGAATTCATGTTCTCTGTTCTTTA GGAGAA  
GACACGATCTGTGTGAGTGGGTCTTACGGAGCGAATGTAGAAGCAGCACAAGCAATCCCTCCATCCTATG  
TTTACGATT CAAA CTTCTACCTGTAGAAGAAGTTGCGACTCCTAACATTGCAACAATTGAAGACTTAGA  
AGTCTTT TTTAACACCC TAAA CA TAAAATACT GAAA AC TTTA GTTGT TAAA ACTCGC CAAAAGACTCG  
GAGAAA TTCTTTGCGATTTGTATCCGAGGGGATCGTCAGATCAACTTAAC CAAA GTTGCATCTTTCTAC  
AAGTTGATGACTGCGAGCTGGCTTCTGAGGAAGAGATCCTTAAGCATCTTCATGTT GAAAAAGGA TTTAT  
CGGACCTCTATACTGTCTATCCCCGTGTTATGCAGAC GAAA CAACGCGCCCAATGACTA  
GCAAA CAAC CAAA AAGACGTGCAAGCATGTGAACTGGGGACGCGATATCCCTCTTCCAGC TTTTCG  
GAGAC TTTCTTTTA GCAGAAGCTGGAGACCTTTG TCCT CAAA ATGGAGGAGCTCCCTAT GAAA TTTTCA  
AGGCGTCAAGTGCCTCATATCTTCAATCTGGGAACCCGCTATACGGAGAGCTTCTCCGTAGGGTTCCAG

GATAAA AATGGAGA TAAA CAGC TTTG CTGGATGGGACATATGGTATTGGAGTAGGGAGAACCCTTGCTG  
CATGCATAGAACAGCTCGCTGATAA CAAAGGACTGG TTTGGCC TTTA GCTGTAGCTCC TTTCCATCAC  
CATTCTCTATAACGGTGGTGATACGGAAGGAGAAGCCACCGCCTTACAAC TTTA TCAAAGCCTGAATACT  
GAAGGC TTTGAGCCTCTACTAGATGATCGCAATGAACGCCTTGGG TTTAAGT TAAA AGACAGCGA TTTAC  
TAGGTATCCCGTA CAAA TTGATCATCGGGAAGTC TTTCCAAA GTACAGGCTTATTA GAAATCGAATCACG  
CTCAGGA GAAA AATGTAATG TTTCTCCT GAAA ACC TATTGGATTGGTGCTC TAAA AATCTTCCCTTGT  
ACAA GAAA GATCCCTCCACTCCGAGAA CAAA ACTAGCACTC TTTA GTTGCAGCGC TAAA ATTCTTGACC  
GGTGGAGACGGT TTTCTTATAATGACACCGACTTATG GAAA ATAGAATA GAAA GTCCCAACTGCGAGCA  
TC GAAA AAAGATT CAAA GA TTTCTGTATGTTCTACTTATGGCAACTAAGCTCTACCTAGAGAGTGGCCAAC  
CAGTAGGCTC GAAA CTTCTTGAG GAAA CTTATTGTTCCGATCTGAGTTCGGCAACGATAC GAAA TTACTT  
TGCTCAGCTT GAAA CGAATGGATT TTTAC GAAA AAATCATATCTCCGGAGGGAGGATCCCCACAGATCTA  
GCT TTTCTGTATTATGCGGATCATAACGCGCCT TTTCTTGAGCAAGAA GAAA TCTTAGCAATCCAA CAAA  
AACTGACAGAGCTTCCGGAATACAG CAAA AATATCG TAAAGGATCTG CAAA AAGCCTCAGAGGTGCTCTC  
CGATATTCTGCAACTCCCTGTCTGCTTCTCTTCCACTCGT TTTGAAA GCGATTCCGTTATTAATATTCAA  
CTCGTAGCTATAGATGATCAACGCGTAGTC TTTGTACTCTCAACTGAG TTTGGGCAAGTTTTTA CAGATG  
TCC TTTGGCTACCTGAACAACCTACCTGAGAACTC TTTAAAAAGAATTGAGGGT TTTCTACAAA ATTACTT  
ACG CAAA CAACCTTCCGATAGTCTCC TTTCTCAAAAAGAAGAAGA TTTAGGGATGGTCTTGTATAATGAA  
GTTGTGGTCCGTTACCTTACTCGTTACTGCCAT TTTAGCGAGGAAGATCTGTAC CAAA CAGGCCATCCA  
GATTACT CAAA TAC GAAA C TTTCAA GATCCT GAAA CGCTCGCTCAAGGTCTCGC TTTCTTTGAAA ACCG  
TAAA CACATGTGTCAACT TTTAAA TACTTACCTGCATAAG GAAA CTCTACCGCA TTTATTGGTCGAGAG  
CTTACTGATATCGTTGGGAATACCGATCCTTCGTGTGCAGTAATTACTATTCTTATTACATGGACCCTA  
CTCC TTTAGGTGC TTTCTGGTGTACTAGGTCTATGAACCTGCCTTATCAACAGGTATTCGGCACACTGTC  
CTTATTACAGAACGAC TAAA AGTCATTCTAACT CAAAGTT TTTACAAG TTTAAA TTGTATTTCAGAAGA  
CCTTGCCCGACCGACCTTAGATGCTCA CAAA GACCAGCAGAGTTGACTCGGAGCTCTTCTATAAAA ATTAT  
TACCTGCTAAGGAGCTATCATGACA GAAACCC CAAA TACCTCGTCGGAAGAAA TTCAGACTAGCGAGCCT  
TCACCTGACAATGAACTCCAAGTGCTCCAGCAAGAAAACGCCAA TTTAAAGGCTGAGCTGCAAGAACAGA  
ATGATCGATATCTGATGGCTCTCGCTGAAGCAGAAA ACTCAAGAAAACGACTACAGAAA GAACGCACAGA  
AATGATGCAGTATGCTGTAGAAA ATGCTCTTATGGAT TTTCTTCTCCTATC GAAA GTATG GAAA AGGCT  
TTGGATTTCGTTCT CAAACCTCTGAAGAAG TAAA AAATTGGGCTATAGGATTC CAAATGATCCTTCAAC  
AATTTAAG CAAA TCTTTCGAAGAGAAA GGTGTGGTTGAATATTCTC GAAAGGAGA ACTATTTAATCCGTA  
CCTGCATGAAGCTGTA GAAATCGAA GAAACCACAACAATTCCAGAAGGGACTATCTTGGAGGAA TTTACT  
AAA GGTATAAGATAGGAGATCGTCTTATTCGCGTAGC CAAA GT GAAA GTAG CAAA ACTTCTGC TAAAG  
GAAA CTGACAGATAACGAAGAAA AAGAATAATTATCCTAGAAA TTAGGTGTTCAATATGAGC GAAAAAA  
GAAA GTCTAA CAAA ATTATTGGTATCGACCTAGGACGACCAACTCTTGCCTCTCTGTTATGGAAGGTGG  
CCAACC TAAAGTTATTGCCTCTTCTGAAGGAACCTG TACTACTCTTCTATCGTTGCT TTTAAA GGTGGC  
GAAA CTCTTGTGGAA TTTCTCTG CAAA ACCTCAGG CAGTAACCAATCT GAAAAA ACATTGGCTTCTACTA  
AGCGATTATCGGTA GAAA ATTCTCTGAAGTCGAATCT GAAAT TAAA ACAGTCCCCTA CAAA GTTGTCTC  
TAACTC GAAAGGAGATGCGGTC TTTGATGTGGAA CAAA AACTGTACTCCAGAA GAAATCGGCGCTCAG  
ATCCTCATGAAGATGAAG GAAA CTGCTGAGGCTTATCTCGGA GAAA CAGTAACGGAAGCAGTCATTACCG  
TACCAGCTTAC TTTAACGATTCT CAAA GAGCTTCTA CAAA AGATGCTGGACGTATCGCAGGATTAGATGT  
TAAA CGCATTATTCTGAACCAACAGCGGCCGCTCTTGCTTATGGTATTGATAAGGAAGGAGA TAAAAAA  
ATCGCCGCTTCGACTTAGGAGGAGGAAC TTTCGATA TTTCTATCTTG GAAA TCGGTGACGGAGTT TTTG  
AAGTCTCTCAACCAACGGGATACTCACTTGGGAGGAGACGACTTCGACGGAGTCATCATCAACTGGAT  
GCTTGATGAATT CAAA AAACAAGAAGGCATTGATCTAAG CAAA GATAACATGGC TTTG CAAA GATT GAAA  
GATGCTGCT GAAA AAG CAAA AATAGAATTGTCTGGTGTATCGTCTACT GAAA TCAATCAGCCATT CATCA  
CTATCGACGCTAATGGACCTAAA CA TTTGGCT TTTA ACTCTAACTCGCGCTCAATTCGAACACCTAGCTTC  
CTCTCTCATTGAGCGAAC CAAA CAACCTTGTGCTCAGGC TTTAAA AGATGC TAAA TTGTCCGCTTCTGAC  
ATTGATGATGTTCTTCTAGTTGGCGGAATGTCCAGAATGCCTGCGGTACAAGCAGTTG TAAA AGAGATCT  
TTGG TAAA GAGCCTAA TAAA AGGCGTCAATCCAGATGAAGTTGTAGCGATTGGAGCTGCTATT CAGGGTGG  
TGCTCTCGGCGGAGAAGT GAAA GACGTTCTGTTGTTGGATGTGATTTCCCTCTC TTTA GGAATTGAGACT  
CTAGGTGGGGTCATGACTCCT TTTG GTAGAGA GAAA CACTACAATCCCTACTCAGAAGAAG CAAA TCTTCT  
CTACAGCCGCTGACAATCAGCCAGCAGTACTATCGTCTTCTTCAAGGTGAACGGCCTATGGC GAAA GA  
CAATAAG GAAA ATTGGAAGA TTTG ATCTAACAGACATTTCTCTCTGCTCCTCGGGCCATCCA CAAA TTGAG



GTAACCTTCGATATTGATGCCAACGGAATTTTACACGTTTCTGCTAAAGATGCTGCTAGTGGACGCGAAC  
AAAAAATCCGTATTGAAGCAAGCTCTGGATTAAAAGAAGATGAAATTCACAATGATCCGCGATGCAGA  
GCTTCAATAAGAGGAAGAACAACAAGAAAAGAAGCTTCTGATGTGAAAATGAAGCCGATGGAATGATC  
TTTAGAGCCGAAAAGCTGTGAAAGATTACCACGACAAAATTCCTGCAGAACTGTAAAGAAAATTGAAG  
AGCATATTGAGAAAGTACGCCAAGCAATCAAGAAGATGCTTCCACAACAGCTATCAAGCAGCTTCTGA  
TGAGTTGAGTACTCGTATGCAAAAATTCGGAGAAGCTATGCAGGCTCAATCCGCATCCGCAGCAGCATCT  
TCTGCAGCGAATGCTCAAGGAGGGCCAAAATTAATCCTCGAAGATCTGAAAAAACATAGTTTCAGCACAC  
GACCTCCAGCAGGAGGAAGCGCCTTCTACAGACAACATTGAAGATGCTGATGTTGAAATTGTTGATAA  
ACCTGAGTAAGATGCTTTATTTCATCTTCTTAAGCAAGAGCCTTCTGAAAAAGGGGCTCTTGCAGCTTTT  
TTTTAAAATCCTTCTCCTCTCTTCTTTCTTAAGAGTAATTAATCCCCTTTGTTTCATGTATGCTAGATAG  
TACGTATCTTGACTGTTATGGCATAAACACTATTTCTAAGAGATGTTGCATCATCAAAAACCCGGCTGCC  
TACTAACCCAGACTTCAAGATGCAAAAACATTCCTTGGGGGTTTGAGAAGTAAGAATGTACCGGCAGTA  
CGACAGTAATGGAGTTTAGCTTGTGGGAAAAGCTAAAAACAAGAAATTTCTAAAATAAGAAAAGCAG  
GTTCTGGTTCCTGGTACCTTATTCGTCCATTCTAGAAAGGGCTTTGGATTGTTGATCCCCAGATCAACCGG  
AGTTATATCCTTTTGATATTTTCATCTCAGCTAGCGACTTAAAAGGTGCTTTTGATGGAGATCATGTTCT  
CGTGGCTCTCCCTTTTCTCTCGTGGAGGAGAAAAAAGAAAAGGGGTCAATTCATAAAGTTCTTTCTCGA  
GGGAAAACAGTCTTAGTAGGGACTATTGTCTCTCTTATCAATCCAACCTAGCTATGGTTTGTGTGAATA  
CCATAGGCCCTGAACATCCTTTTAAAGCCGAGCTTACCTAAAAGGACTTACAACCTGGGAGATCGGTT  
GTTACTAAAACCTCCTGTGTGGAAGGAGAATTATCCAGTAAAAGAACCCCTCCCTTGGCTATGCTGGAA  
TTTTATAGGCAATATCTCTAATGCTAAGACAGATTTTCTGTTATTAAGCCGAATTCCTATTACAGAAG  
AGTTCCCCGATGCAGTGGTACAGGAAGCTAGTCAGTTCTTACAAGACGTAACACAAGCGTTACACTC  
GAGGAAAGATCTCCGAGATTTTGTATGTTTACCATAGACTCTTCTCTGCTAAGGACTTTGACGACGCA  
GTCTCACTAATTTATGATCATGAGGAAAATATATCTAGGTGTTTATATTGCGGACGTCTCCACTACG  
TGACTCCTAAATTCGCCTTTTGATAGAGAAGCTGCTAAACGGTGCAACTCGATCTACTTCCCTGAAAAGT  
CATCCCTATGCTGCCCTCAGCCCCTTCTGACAATCTGTGCAGCTTAAACCTAATGTGGATCGCTTAGCT  
GTATCCGATTTATGACTTTTCTCTAAAGAGGGATTCTTTCTGACTACCGAATTTTGCCTAGCGTCATTC  
GTAGTAAATACCGTATGACATACGATGAGGTAGATGAAATTATCGAGAAAAACAGACTCACCTATTTTC  
TAAAACCATTTTTAAAGATGGCTGAATTGAGCCGTAATTTTTCTGACATCCGAGAACAACGTGGATGCAG  
CGTCTCGTTCTTCTTCTGTTACGATGTCTCTTGATAATTTACAAGAGCCTGTAGCCCTTATCGAAAACA  
AACAAAAGCTGCTCAAAAATCATTGAAGAGTTTTATGCTGAAAGCGAATGAAGTGATAGCCTATCACAT  
TTCCATCAGGGAATAACCATGCCATTCGACACATGAACCTCCTAATGAAGAAAGTCTCCTTGTGTTT  
CAAGAGACAGCAAAAGGCTATGGGCTTACCATTACAACAACCCCGCGCAAGAACCAGATTACCAATATT  
TATTGCAGGAAAGACTGCAGGCCATCCTTTGAGCCAATCCTTCTCAGTTTGTACGCAGTATGAA  
GACGGCTTCTTATCTACGGAAAACAAGGCCATTACGGTCTGTGCTTAGACTACTACACACACTTTACT  
AGCCCGATCCGCGGATACGTGGATTTGATCGTTCACCGACTGCTTTTTCATTCTCTCTGTAGAAGAAG  
AGCATCTTGAACAAAATTGTTGAGCCTGCTCATCCAAGAACGCATTGCAGCGAAAGCTGAGGGAGCTTT  
TGTAATAATTAAGAAGGCTCGCTTCTTGAATAAATTCATAGAAGAGCAGCCTGCAACTCTTTATAAAGCT  
TTCAATTATTACGGCATCCCCGGAAGGATCTCTTTTGTCTCTCCAGAATTTTGTTCATGAAGGTTTCATTC  
CTGCGGCCTAAACTACCTCAAGCGTACGTCTTCAAAACAATAAGGATTAGAAGAATTCCTGAACATTT  
GCGTCTGGAGCTGTTATTTCTGTGCAACTGGCTTCTGTACCTTGTCTCACACAGTCTATCGAGTGGACG  
TTGGTTGAAGCCACAACATAAGCTAAAGCAAAAGCGTACCTTAAAAGAAAAAACAGAATCTGTCACGA  
CTAAAGAAAAGAAAAGAGTTCTGCTAAAAGAAAAGAGGAGCTACAAAACGAAGAAGGGCAGTGGGAA  
AAATTAGATCCTTCAAAATTATTCTTACATGAATTTTTGTCTGAGCGACTTTCTCCATTGAAAAGAT  
TTTCTTAAACAAAACGTGCTTTACTTCTTGCAGAAAATCGGTAAACTTGGCGTTTCTGTAGGCAGACT  
CGTCCGCTCTTTTCTCAAACTCCCTTTTATAGGAAGTTTTTGAAGGCTTCTCAGATTTTCCGAGTT  
GGAGGAGACTGGCCGGCACTACAAGCTCATATCAAGGTAAGGAAAGATTTCATGCATGACGCCCTCAA  
AGTATTTTGCTATCCAAGAGCTCGATATAAAATGATCCGTCTAATGCGGGTCAAAAAGAACAATCAGA  
ACGAGCTCGTAAAATTCAAGCTTTAAAACGGATATCCGTGCGAAGGTGGAAAGAAAAGAACAAGAAAT  
GGAGAAGCTGAAAGATCAGATCAAAAGCGGAGAAAACGTATTCAAAGAAATTTCTGATCAGATCAATAAA  
TTAGAAAATCAGCAAGCTGCTGTAAAATAAATGGATGAGTTTAATGCTCTAACCAAGAGATGACCGCAG  
CTAAATAAGAGCGTCGCACTTTGGAGCACCAACTTAGCGATCTTATGGATAAGCAAGCTGGTAGCGAAGA  
TCTTCTTATCTCTCTGAAAGAAAGTCTCTCTTCTACGGAAAATAGTAGCAGTGCTATCGAAGAAAGAAAT  
CGAGAGAATATTCGAAAATTAATGAAGAAGGTCGTTCTTTACTAAGTCAGAGAACACAGCTGAAAGAAA

CGACAGATCCAGAATTA TTTAGCGTCTACGAGCGCTTGCTCAACAACAAGAAA GACCGAGTTGTTGTCCC  
TATC GAAAATCGTG TTTGCAGTGGCTGTCATATAGCTCTTACCCGCAACATGAGAA TTTGGTACGTAAA  
CAAGATCATCTTGTAT TTTGTGAACACTGCTCAAGAATTCTTTA CTGGCAAGAGTTGCAAGCTCCATCAG  
CAGAAGGCGCAACTA CAAAACGTCGTCGTCGCTACTGCAGTATAACGAACTAATCGGAAGAGTAAGGC  
AACCGCT GAAAACAGCTTT TTTAAA AAAGATGAGTACCAGAG GAAAGTCCGGAC TTTATAAGAAA AGATGC  
TGGAGAAA TTTCCAGGGGCGTAAGGCTACG GAAAGTGCAACAGAAA ACACTCCGCTATAAAA TTTGTATAAT  
TTA TAGACAGGCT GAAA AATCTTAC TTTAGGAGTAAGAGCTGCTAGG GAAA CTTAGCAGACTTG TAAA CC  
CCATCTGAAGCAAGA GAAA AAGTTA TTTGTTCTG CAAA CAACC TTTCTAAC GAAA GGCACAGGCTTT TTT  
CATAATCGCTTGAGGAGTACAGTAATGTGCTCCCTAGATGAATGGTTGCCCGCAAGCAAGA ACTTCCGTT  
CGTGCTTGTCGACAGAATCCGGCTTACTCGCTCTTCCGAGCTTTT TTTATTATAATAATCCTGCACGTGC  
TAACGCATGCATGTGTAGTAGCCCAACAAT GAAACGTTGTTGTTGAGCATCAACTACAGGAAGTACGGTC  
ACAGGA TTTCCAGATTCATCA TTTCTAAGCTCAATAGTACATCCGAATCCTCA GAAA TAAC TTTA GGGT  
TACGTGTCATGATCTGTTGTAACGGGTAAGC TAAA ATATCTCCTCCGTATTCCAGACAATCCTCTACGTAA  
ATCTCCATCTGTGAATATCCCTAATAAATC GAAA AGTCA TTTA CTACACAGACACCCCATATCCATAC  
GAA GAAA GTATAGGAAGAGACTCTGCAACAGTAGTTAATGGAGAGCA GAAA GGCAC TTTAGTTCTTGGGT  
ACAAA TAATCTTTGAC TTTCCCATTCGC TTTCAAGCCTATCTGTCCACTGGGATGGTTGCTCCCATAAATC  
CGACAAG GAAAT TTTCCGACAACGTAACAGTGTCA TTGCTAGAAGATCAGAAA AAAGTAATTGGCATGTG  
GTTGAGGTTGTAGGCATAAGAT CAAA AGGATCTAACTCTTCTAAC TTTGGCAGTACAACA CAAA ATCAG  
AAA AAGCGGC TAAA CTTGAGCAGCGGTGCAGCAGTGATACCAACA GAAA AATGGGTCTATTCTT CAAATG  
CGGAATCCATTC TAAA ATCTCTCGAG TTTCCACACTA TTTGAAA ATAGACAAA CGATATCTCCTGGAGAA  
ACAACCCC TAAA TCTCCATGGAGAAGATCTCCT GAAAGGAAA AAGGC TTTCTCCC CAAA AGATTGCATCG  
TCGCCACTAACTTACGGGCGATGCAACC ACTT TTTCTATCCCA GAAAAAATACTGATCCCTGATGACA  
AAGAAGTT TTTCTGTGAGCTGATGAACGCAATCATAAT GAAAGCTAGC GAAA TACTGAGAAA TAACCTGT  
TTTTGCTTAT GAAA AATATCTAAA CAAA AGGTTCTCTGCAATGCCTGGTACGTACATTACT TTTCCACGCTA  
TAT TAAA AAAATGTCTTCTAGCTCATCGTAACAGACTCTAAGCGATT TTTCAAAGCTGT TAAA AACTCTC  
CACCG TAAA ATCCATCCAATACTCGATGGTC GAAA GT TAAA GTGACATACATCAT TTTCTAATGGCTAA  
CGAGTCATCATCACGTACAACCACTCGTT TTTG AATTGTTCCGATCCC CAAA ATCGCTACTTCCGATAA  
CGAATTATCGGCATGCCAATAAGAGCTCCAGTCATAC CAAA GTTGGTTACAGTGACGCTTCCCC TTTCCG  
TTTCTGAGGAATCTAA TTTA TTAGATCGCGCCCTTGAAGAAA GATCCGCAAGAACCTTAGCAATACTTAC  
AAGACCCCTATCCTGACAATTATGAATAACAGGAACA ACTACTCCTTCT TTTATT CAAATTTA CAGCAACT  
CCTACA TTTA TAGCCTTCTTGAGGACAATCGTATCCCCGTC TAAA GAACCATTAAGCAGTGGGAAC TGCT  
CTAAA GACTTAGCTAAGCACTGTATAATGAAGCTGGTGATCGTGAG TTTCACTCCATGAGCAGCAG TAAA  
TCTCTCTCGTCCGCAGAGATGAGATTCAT TAAA TCTGTAACATCTACATCAACAACCAGAGAAGCATGC  
GGCACCTCTTCTGAAGACTGTCTG TAAA GAAGAAGCGATAGCCCGACG TAAA GGTGA CAAAGGAATCTAT  
TTTCTCT TTTA GAACAGATCGGATCCCTAGGTTCTCTTGTCTG GAAAGATAGCGTTCTACATCCTTACG  
AGTAATCCGTCCCCCTCTCCTGTCCCCGAGATCT TTTGTAATCTTGAAGATCTAACCCTTCTCT TTTGG  
G CAAA TCCTAATACTGCGGGCGAGAGCCA TTTCTGCTCTCTATCTACAGAATGATCTCTTCTCTAACAG  
GATCTCCACAGGGCTTT TTTA CAGGAGTATTCGCTGCAGCGG TTTCTCG CAAA CGCGCTAGAATATCTCC  
AGG GAAA ACCTCTTCCCCTTCTG AACCAGGCACTCCTC CAAA ATGCCAGCTTGAGAAGGAGCTAACTCT  
GTAGCTATCTTATCTGTTGAGACCTCAATCAATGGCTCATCTT TTTG AACAGGATCTCCGACCTG TTTCA  
ACCATCGGACAACAATACCTCCAGATGCGGTCTCCCCTATT TTTGGAAATC GAAA CTCGAACATGAATCT  
CCTTA TTTCTGAACTCGAAGGC TTTA GTATTCTGTTAACTCAATATGAGAAGAAGATGATCAACTGGCTT  
TTA CAGATAAAAAATGCCTTTTGAGGG TTTAATAACAT GAAA ATCTGTACACTCACCTGAAGGCGGTTAA  
GCACTCCCTATGTTACAC TAAA CATTT TTTGAAA CCACAGAAA AGACGCT TAAA CCT TAAAGAAA ACGAA  
GAGA GAAA ACCCTCTTCGT TAAA AGATCTCTAACCATGTTGAGGAAGGATATCCTCTTACCCTCATTAG  
AAGAGGAGAACTCACCTTCTCCATCTGCAATATA TAAA GTAACAAC TGCATCCCC TAGAATATTCATAGG  
AGTGCCATGATATCTCT CAAA CGATCGATCCCAGCTAAGACTGCGATCCCTTGATAGGGAGTCCCACA  
GAAGTGAGCACAGACCCTAACGTAATCATTCTCCTCCAGGGACTCCTGCACTTCTTACAGCAGAGAATG  
TCGCAGTCAAC TAAA AGAAG TAAA CTAGT TAAA GAAA GAGGACAATTATATGCCTGAGCAATAAA AAC  
TGCGGCCATCCCTT GAAA AATTGCCGTACCGTTCATGTTGACAGTCGCACCTAAGGGGAGCA CAAA ACCT  
GAAA CTCTGAA GAAA CGCCGAGATTT TTTGAAA CGCAGCGCATAGTAACAGGCAGTGTGTCAGAACTAC  
TAGCAGTCGATACAGCACAA GAAA TGGCATCCATCATCGACGA CAAA AACTTGC TAAA TGAGCTCCTGCA  
CCCTAATCGAACTAAGCCCCGAATATCAATATAGCATGACATATACAGGC TAAA TAATAGACAACAAGA

AACTTGCCTAATTGAAGTAGGACGGTCAGACCATGATTGCCAGATATCCAAGCCATACTTGCTGCAACTC  
CATAAGGAGCAAAAGACATAATCATATTTACCATGCGCAGCATAATCTCATTACACCCGTGAAACAAACG  
TTCCACAGGGCGAGCAGCTTCTCCAGCTAAGCGCATAGCAATGCCGTGTAACAAAACGAAAGATGATGATC  
TGTAGGATATTCCCTTCTACAAAAGAACGTAAAGGATTTGAAGGAAACACCTGAGCGAATGTAGCTAAAA  
AATTCATCCCTCCAGATGATCCGGACGAAGCAAGATCCACTGCATTAACCTTGAGATCACACCCCTT  
TCAGGACTGAAACACAGAGCAAAAGCTAACCAATACCAATAGCAACGGAAGTTGTGCTAGATACAA  
CCCAAACTTCTTAAGCCTATACGCCCTAATTTCTTCATATCGCTAATCGAAGCGATCCCACAAACCATAG  
AGCAAAAGACTAAGGGATATACTACCATGCTGAGTAGATTTAAAAGATATCCCACAAAGGTTTCACAA  
AACTGC TTGTCTTCCAGAATTAAGCCG GAAACAACCCCGATAATTAGGCCTATAAAAATTTTCATCCAT  
AATTTTCATGTAGTTACCCTCTTATTCTTCTGGATGGATTCTATTGCATCCAACATGGCCACCATTGCTCT  
TTTCATTGCAAAACGCAAGAAACCGCATGCGGACTTCTCCAACCGCAATGATA TTTC TTCAGCAAGCGCT  
CCTATT TTTACGCTATCCTTTTCTGTACACAGGATACCAACTCCTTGCGC CAAAATGAT TTTC TTA CAA  
AAAGTTCTAACTCTTGC TTGT TATGCCCACATGGTCAGGTAATAGATACGTACC TAAAACATGAATCCC  
TGCATCTCTTAACATAGCTAAGAATCC TTTAGGAAACCTAACCCA CAAAATACCCCCACACCTAGACCT  
TCCCAATGATCTCGAGGCATG TTTA CAGATTGATTCAAC CAAACAA TTTC C GAAA TCTGAGGCTCGATCA  
CGATCTTCTCTTCGGGGTGAATCGATCCAACCTCACGTTGATCGGAAGGCGAACATCTACCATTAATCAT  
GACGTAATCCGCTTCGCCAATC TTTC TGGGAAGTCTCGAAGTCTTCTCT TTGTG GAAAAAAGAGCCTCCT  
C CAAAAGGATCCGAACCATTCACTAATAACAATCTCTACATC TTTATGAAGGCGATTGTATTGAAA TCCGT  
CGTCCAACAACAAAACAT CAAAATCCCAGCACTCTTCTCCGCAAGGGTTTTTCGGTCTTTTTGTATCCG  
TACCGCCCCTGACGG CAAATGCTTGGCTAAGAG CAAAAGTTTCATCTCCAACACAAGAAGCGGTGTGAAGC  
GCTGGATTACAAATAG TAAACGCTTT TTTC TTAATAATA TTTC C TTTGTATCCTCTC GAAAGCACCGCAC  
AAGAAA GCCCTC TTTC ATGCAGTGCTTGGGCTAGCCATAACAC CAAAGGAGTCT TTTC CTGTCCCGCCAC  
AACGATATTCCCTACACTCACCACTGTTGCTTGTACTTGTAGGAGATTTCGCAATCTTATGTGCGCAGC  
CAAA CAGAGCCAGAAAACACTCTAGCTATGACTGCC CAAAGCCAGCT TAAACGATCAGACAAGGCTCCAG  
AAGTCGCAGATATGATGAGATGACG GAAAAGGTCTCGAATACCAGAAAAGAAACTGAATCTCATGGGCGC  
CCTACTCAAGTTCTTCC TAAACGAACAACCTG CAAA AACTATGACAACCC TAAAGGGCTGAGACAGACTC  
TTCGTCTCT TTTA ACCAAGTAGCCTTTC CAAACGAGGGCATCCTGAAGGATCGCATA TAAAACAT TAAAAA  
TCAAG TTTCAAACCTTGAATCATAAAAGATTTTC TTATACTTCT TTGT CCGAACGACCTCATAAGCAACAGC  
TGCAACAGAAGAAG GAAAGG TTTAATGAATCTGCT TTTC CCTAACATAGG TAAAGCTATGTTA CAAAACCTT  
CCATTCAACCAATCAGGCGACAGCCCATCTTTTTC TGAGC CAAACACCACAACCGTCCGTTGG CAAAAT  
CTTGAT CAAAATAAAAG TTGTGCTGATGGAGTTGTTGT GAAAACCTGCCATTCTTGTGTTGATGAAC CAA  
ATCCAAGACCTC TTTCAAAGAAGCTTGC CAAA CAGGCATAGTGAATACTGTACC TAAAGAGGAACGAATT  
ACATTGGGATTGTA TAAATCGACTACAGGATCA CAAA GAATGACTCCATCCACCCCTGCTCCATCTGCGA  
TCCTTAG CAAAGCTCCTATATTTTC CAGGTTTTTC TGCTTGCTCAACAAT CAAATAAA AAGGAGCCTGATT  
C TTTC GCTGCAATCC TAAAAACTCTTGGCAAGACAGCTC TTTC TTTCAAACAGCAATAAAAATCTCG  
GGATTCTC TTTAAA CGACAGTT TTTC CAAAATATCCTTAGAACAAATACAACT TTTC AATACCAAGCGAAG  
TAAGCTCGCGATCAAGAGCTATCTCCTTATCGGCAATTAGTTCTCCG CAAAATACATGCGAACACGGTA  
TCCA GAAATTAGGGCTCGATGAATCTCTC GAAA CCTTCTAA TAAA AAATATGTGCCATTACGTGCCCGC  
TGGCGC TTTAAA GCAAGAGCACTCTTAACACGGGCATTATT TTTC CCTATAAAA CTCCATTGCG CAAA CAC  
CCCTGAAGGCAACCGTTGATTCCCCTACCA CAAA AAT TTTC TCC TAAACGCCACCCTTGGAGAGGAAGC  
ATAGGAAGCGCTCTTCTAGC TAAA CAATG CAAA AACTCGGGAGTATGTCCCCTGTATGTGAAGTAATCA  
GCATATGCGA GAAA GAACTAGAGAGGAGCTGTGAACACAACCTCTAA TAAAGG GAAA AAATCGCGATCTAT  
TTTG AATGTCTCTCCATCAGGACCTCGCCCATAGGTAGGTGGATC CAAAAGAATGACATCATAAGTCT TT  
CCTCGACGAATTTCTTCTTCAAGAAG GAAAACACATCTTCTATAATC CAAAAACCCT TTTA TCTT GAA  
AAGCGTTCCCTTCCAGTTTTTTTGGGCCCACTTAACAGCTGC TTTA GAAGCATCCACATGATAAAA CTGT  
TGCTCCTTGTGAGCACA GAAAATAGAAGAAGCTCCAGTATAAG CAAAGAGATT CAAA ACTCTACATGAA  
GGCTTGGCTACAGAAGGTG TAAA TC TTTC CAGAACCAGCATGCTCGGG GAAA ATACCTACATGAC CAA  
AAGGAGTCAGCTTCAA TAAACAC GAAA CAGAATCGATGGTTATCCACCATTCTTTAAGA TTTC TGTTGCG  
ATACCGCCATTGCCCTTGTCTCCCATACGAA CAAA CTGAGCAGAATACTGCCCCATAAGGAGGGAGAG  
CTC TTTC GGC CAAA TAGCCGTGGCAGAAGAACGAATTAAG CAAA CATCCT TAAA TCGCTCTAG TTTC TTAC  
CGTCCCCTACTATCTAACAACCTCGTAATCCATCA TTTC GCTGATCTCTT TTTC GGCATG GAAA CGCATAATT  
GTGTCCACCTGCATT TTTC TCATCATATCAGGCTCCATATTACGTGAGCACCCACCTG TTTA TAACCCA  
ATGAGGTGCGCGCTCGAGTCTCCGGAAT CAAA CTAAC TAAA AGATGTCCCC TTTA ACTCGTGAATTTGT

CAAACTGATGCCATCAATAGCAATGAAGCCTTTC TC TAAAATATAAGGCAC TAAA TTAGCTGGAGCCTTA  
AAAAACATATAGGA TTTCTCTATGGCAATAATAGTGCCTATCCCACAGACATGCCAGAGA CAAAATGTC  
CTCCTATTTTCATCTCCTAATCGAACCAGCGTTC TAAATTTA CCATGGTTCCCACCGTATAATCTTTGAT  
GGTAGTCCAAGCCATGG TTTCTTCAGTCACAT CAAA AAAGAGTAATTCGTA CTGTCG TTTGACCAGAGT C  
AAA CATATGCCATCGACGGAGAAGCTACTCCCCGAACCACATCGATCAACTTGCAG CAAA AACTCCAA  
TCTCCATGGAATCCCCGAGATGGTGAATAAGATCTACCCGTGCGACTTCTTGAATAATGCCT GAAA ACAT  
AGACAAT TAAA TACC TTTGCTAGGTCGTGACAACAATACTT TTTA GCAATCTT GAAA AACTAGATACAG  
AAAAAGCCCTCTCCGGATCTGATCAAGG CAAA CAGCGGTTGCTTATAAT CAAA AAATAATTACTCCGA  
GACCGCCCGTAGA GAAA ACC TTTCTAAGAAGAGGTTCT TTTCAACACAAGACACAGGAT TTTA TCCATTA  
AA TAAA AACCGTGGTATCTTGAGCGTCTGCAGATATTAGGCGACT TTTGAAA AAAAATCACC CAAAT  
CACAATCAAGAATTGTGTTACTAGATCCCCAAGCTACCTC TTTCTTTCA TTTCTGAAGGGCCTATCGTA  
G TAAA CAAGGATCTAATA TTTGAAT TTTAGGAGGAATCTCCCATGCTATGCCCAT TTTGTAACCATGGAG  
AGCT TAAA GTTATCGACTCTC GAAA CGCACCAGAGT CAAACGCGAT TAAACGCCGTCGCGAATGCTTACG  
TTGCAGC CAAA GAT TTTA CAACC TTTGAAA CAGTAGAATTAAGTGTACAGGAT TAAA GCGAGACGGTCGT  
TAT GAAA ACTTCCAAGAAT CAAA GCTCGTCAATGGAT TAAA AGCAGCTTCCAGCCATACAAGAATTGGAC  
AAGAACAAGTACAAGCAATCGCCTCTAATAT CAAA CAAGATCTTCTTG GAAAA CAAA ATCGA GAAA TCTC  
TAC CAAAGAAA TAGGCGAACTAGTAAT GAAA TATC TAAAAAAGCAGATATGATTGCGTACATTAGGTTC  
GCCTGTG TTTACAGAAGAT TTTAAA GATGTAGGAGAGCTAATGGAAGTCTTATTATCTGCAACACCAGATG  
GT GAAA AACAAA CAT GAAA AGGAGAATTTGTATGCCCTAACGGACGAA GAAA TAGCCAAT TTTAAA ACAC  
GTCT TTTAGAAA TGAAGGCTAAGTTGTCTCATACTCTAGAAGGGAATGCTCAAGAGGT CAAA AACCTAA  
TGAGGCAACAGGCTATTCTCAGCACCAAGCAGATCAAGGCACAGATACG TTTG ATCGAACTATCAGCCTG  
GAAGTACTAC TAAA GAGTATAAAA CTCTTAGA CAAA TTGATCGTGC TTTAGAAA AAATTTGAAGAAGCCT  
CTTACGGCAT TTTG TGATGTAAGTGGAGAAGAAA TTCCGTTGGCAAGATTAATGGCAATCCCTTACGCTAC  
GATGACTGT GAAA TCACAA GAAA AATTC GAAA AAGGCCTTC TTTCTG GAAA CTAGTTACAATGCCGACC  
GTTCTCTCCAACCTTCTTACTCTCCTTCTCCTAGCCTCTATTGATTGGGTCT CAAA ACTAGTTGTGTT  
ACTCAAGAGCTGCCAGCTCTCCCTCACTCCTCAGCT TTTCTTTA TAGCTACGTGTGGGGACATT TTTCT  
TTTC TCATTATTCCCTCCTTCAATGAAGGAGCAGCC TTTGGACTC TTTGCCAATA CAAA ATCCCTCTTC  
TTAT TTTCCGCG TTTG CGTAATCCTAGGCCTAGCCTTATTCTTGAGAAT TAAA TATAAGTC TTTA CATAG  
AAGAACACGAATTGC TTTAACCTTGATCCTCGCTGGAGCTCTAGGGAATGTGGGTGATATCTTACTCCAC  
GGTAAGGTTGTCGACTTCCCT TTTCTTAGCTATTACTCCTGGCGC TTTCTTCTTCAATTTAGCAGATG  
CG TTTA TCTCTATAGGAACCTCCTTCTTATTGGTCACCTATACTTAC TAAAGAAA G TAAAAAATGCTT  
TTAACAAA AAATTC TTTCTTTCAAGGATCTCTCTAC CAAACAAA AAG GAAAAAAGGGATAATATAGGGTA  
AT TTTCAAGGAAT TTTAGTTTAA TCAATAT TTTA TGAGCGCG TTTCTGTCTTT TTTGACCGCTTTTCGA  
TGACTTTATTTG TGCATACATAGCA TTTGTTTGA TTTCTTGTCTGGAGT TTTGTTACATG CAAATCT  
AAATTTGCACAAT TTA CTCAACTTCTGCGTT TTTCAAGCTATTCTACCATT TTTCAAAA AGAAGCCTCGT  
CAAAA AAA GAAA AC CAAA A GAAA GGTGTT CATCCGT TAAA AGTATTC TTTG CTCCGCAGGAGGGAATAT  
CGGCATCGGCAACGTTGTTGGGATAGTCACAGCTGCTAGTGTGGTGGACCTGGAGCTCTCT TTTGGGTT  
TG GATAGCTGGAATCCTAGGGTCTATAGT TAAA TACTCCGAAGTCTATCTAGGTAT TAAATTCGTCAGT  
CTGATGCCAATAATGTGTATCATGGCGGCCCTATGTTCTTCTTGA TAAAGCCTATAGAACCCGCATTGT  
TTC CGTTATCGTTGCTGTTCTCCTCTGTAT TTTA TGGGGTAGAGATCTACCAAT TTTCAATTATTGCCAAT  
ACACTGGCCTCTTGTGGGATGTCCC TAAATTGATGGCCATTGCTTCTCTCCTTCTCCTGGTTATGTATG  
CTGTGCAAGGAGGCTTGCAGCGGATAG GAAAAATCTGTTCCCTAGT TTTACCCCTTCTCATGTTGGTCTA  
CTGCGGAATGGCTT TTTATAT TTTG ATTCAAGAAA TCCATACTCTTCCC GCGTATTCTCTAGTAT TTTCT  
CGGTCCGCC TTTA CAGGTCATGGAGCGATCGGAGGA TTTGCAGGATGCACAGTGGCTTCCACTATTCGTC  
AAGGACTATCTAGAGCAGCTTATTCAGGAGATATTGGTATTGGG TTTG ATTCCATTATC CAAA GTGAAA  
ATCTGCAA CAAA TCCCTCAGACACAAGCGCAGCTTAGTATCGTCGGAGTGATTGTGGACAACCTCGTATGT  
ACGCTAAGTCTTCTATCGTTCTTGTCTTGGAGTGTGGCATCGAGCAGGACTCGAGGGATCA GAAA TTG  
TAGAACAGGCTC TTTCTCCTACTTCCCTTACATTCGTGTATTCTTCCC GCG TTTCTG TTTGCTACAGG  
ATACACCACCATTA TTTCTATA TTTCTCTGTAGG GAAA AAGTGTGCGAA TTTCTATCTGCG GAAA CAAA GGA  
TC TAAA TTCTATACCGTCTATGGAATTATAGCTCTGCCCGC TTTCTGTT TTTCTTCCACAGGATACAGCAT  
TACTTGTATGTCTG TTTCCGGGAGCTCTATTGCTATGCCTCAAT TTTA TTGGGGTATTCTTAAATGC GAAA  
AGAGCTCAT TTTCTCC CAAA AAAGAGGGCG GAAA ACTCTCGAGG TTTCTGAGTCCACTCTCTTCA TAAAAG  
GAGAGAGAGTCA TAAA GCTGTTGATGAT CAAA AAGACGTGCCTTATATATGGTCCCTC TAAA CCCC T GAAA

ATTTTTAGAAAACATATAGGTGATTTTGGCCCTTGTAACCGTAATTTTTCCTATTATAGGAAGAGCTTTCCT  
GAAGAGAACTCTAAAAGCCTTCTTGCTCAAGGACAAAATTCCTCCAGACTTTTAACTTTC AATGTCATA  
TAATGATGGCTTGCAACCAAGAACTTCTTTCGCCTAGAGGCTTAGATTTTGCTCAGCAAAAATTCATTC  
TAATCTTACTCCTACGATATTTATCCATCAGACCACAATATTGATCTGCAAAAGTTTCTCCACTCACGCG  
CTTTCGTTGTAAGAACTTTGAAA AAAGCTGGGTACGAAGCTTACATTGTGCGAGGCTGTATCCGAGACC  
TGTGTTGAAGACAGAACAAAAGATTTTGATATCTCAACCTCTGCTAAACCTGAAGAAGTAAAACGTT  
ATTCAAA AATTGTATCTTGTAGGCAAAAGATTTTCGTTTGCTCACATCCGTTTCCAAAACAAAATCATA  
GAGGTCGCTACC TTAGATCTGGTAGCAACGAAGAAGACTCCTTAATTA CAAAAGATAATCTTTGGGAT  
CTGCCGAAGAAGACGTATTACGCAGAGACTTACGATTAACGGCCTTT TTTATGACCCTAGCGCAGAAAT  
TATCATCGACTACACAGGCGGTGTTGAGGATTTTAAA AAATCGCTATCTCAGAACTATTGGAGATCCTTTC  
CTTCGTTTCAAA CAAGATCCTGTGCGCATGCTGCGCCTAT TAAAAAT TTTATCTCGTTATGCTTTTACAG  
TAGATCCTAAA ACTCTAGAAGCTCTTCAAGAATCTCGTCACGAAC TTGTGAAAAGCTCTCAACCTCGAGT  
CTTTGAAGAAAATCATCAAAGTTTTGAGTTCTGGGGAGTCTACCATTTTT TTTCCAGCTAGCTTCCGAACAT  
CGCGTCTAGAGATTTTATTCCCTTACATGGCTAAGGCATTTAGCTTAAGTAAGACTCTGCAAGATCAGA  
CTTTCGCTTGCTTAACAGCATTAGACAC TAAAATTCAGAAAACGCTCGTTCTGTTTCA GAAAGACAC TTTCT  
GCTAGCGATCCTATTATTCCTATTGTTAACTTCAATGTGCGGTA CAAATATAGTCAATACCCAACGATG  
ACTATC CAAAGTATCTTTGACTATATTCGAAACTTT TTTGACTGAAATTTTTTTG CCGACTCATTTA CTAGTT  
GTTCCAAGAAAAATTTTCATCTTGACAACCTCTGCTATTGCAAAATGCAGTACCGGCTGACCCCATGAAATGC  
TATGAA GAAAGAAAAAAAATCTTTCTTCAATAGAAGATTGTTACGCCATGCCTACTTCCGAGAAGCTCTT  
TACTTACTAGAAA TCCGCAGTAAAAGTGTATCTAAAAGTAGAGGCTACCTATGGAGAGTGGCTTAAACATT  
ATGAATTAGCATCGGAATGACCATTCTTA TTTGAAA TTGGGAAAATCTTCTCCCCTATCGATTACTACA  
ATGAGTTGTTATGTTTCCCAA AAAAATTA CACTCTGTTTATACCTCTAGGACTATTGCCAACCTCTTC  
TTTGGCACAGCTTT TTTGTGTTCAATGTT TTTAACTAGAAAGAAA GGGTATTCTGTCGTTCCAAGATTT  
TTTGTATCTGTCCGGTACCGGCGCCGT TTTCATGATTTTGCCACGGA TTTATTCAAAGT CAGTATCCTAT  
TGCTTTGTTGCATTCGTTTAAATCTGATTATTTATTTCCGGAACCTGAATATCGCCTCTCTAAAATCCCCTT  
CCTGTTTCGAAAATAGCTTCTCTACTAGTCTCAGTAGCAACAGCGATCACGGTATCT TTTGCTATTGGAA  
CGCGTTACCTCCATCATATGACGTGGATGGCATCCC CAAATATCCTCCATTTG AATCTACCAGAAGCGAG  
TTTGT CATGGCAGCTGATAGGATGTATCGGATTGACGATCTTCTCATTGAGATTT TTTCATCCAGTGGTTC  
TATCTCGAATA CAAA AACCAATCCGCCCTGCCGCTCCTTTTTTGAAA GCAAGCCTACTAGGAGGATCTA  
TCTGCCTTCTCTATTTTCTAAGAACGGGGATCTCG TAAACGTGTTATGTTATGGATGCGGGTATTCCC  
TTCTTTTAG CAAATCTACGTATCGCTTACGAGAAGC TTTCCGCAAACCTTTTAGCAATAGCTGCTTTATT  
TCTGCGGGCGAACATAGTGGAGATAC TTTGGGAGGAA TTTAT TAAAAGAAATGCACG CAAAATACCCTG  
ATATTCATTGCTTTG GCGTGGGGGACCG CAAATGCGTGCACAGAAT TTTCATGC ACTTTTACTATGGA  
GAAATTTTAGGTTAGCGGATTCTGGGAAGTACTTTTAGC ACTACC TAAATTTATGGTACCCTATCAGCTT  
CTCTATAGAAAATATCTGAAAACAAA TCCGCGCACAGTGATTTGCATTGATTTCCCTGATTTTCA TTTCT  
TATTAATAAAAAATACGCTCTCGAGGATATAAAAGGAAAGATTGTTCACTATGTATGCCCTAGCATATG  
GGCTTGAGACCTTACG GAAAACAGT TTTGGAAA AATATCTAGACCTGCTTTTACTAATACTTCTTTT  
GAA CAAA ACTTATTCAAAGATT CAGCTCTGCGTACAGTCTATTTAGGGCATCCTCTTTTCTGAAA CAATTA  
AAAGCTTTTCTCCAATCTAAAATTG GAAAGATCAGCTCCATCTTCTACCAGTAAACCTTTTCATTGCAGC  
GTTTCTGTTAGCCGTCGCAGCGATATCCTGCGTAATCTAACCATTCAAGTGCAGGCC TTTCAAGCATCC  
TCTCTTG CATCCACACACCA TTTACTTGTATCGTCTG CAAATCCGGAATATGACCATCTTATCCTCGAAG  
TGCTTCAACAGAATCGGTG TTTGCACAGTCATATTGTTCCCTCCAG TTTCGTTATGAATTAATGAGAGA  
ATGTGATTTTGCCCTCGC CAAATGTGGA ACTATCGTCCTAGAAA CGGCTCTCAATCTAACTCCTACGATC  
GTC ACTTGCCAGCTCCGACCTTTTGATACTTT TTTAGCTAAGTATATCTTTAATATTATCCTTCCAGCCT  
ACTCGTCCCCTAATATCATTCTAGGCAGAACGATTTTTCCTGAATTCATAGGTGGGAAAAAGATTTTCA  
ATATGAAGATGTTGCTGCTGCTC TAAA CATTCTGAAAACATCTCAAGCTCAA GAAAACAAAAGACTCT  
TGCAGAGATGTGTATCAAGCAATCAATGAATCTGCATCCTCTATGAAA GAGTGTCTTCTCTCATATTCG  
AAA CAGCTTCCATAATAGATTAT CAAA GACTTATAAAA AATCTTGGATCGCTAGAAAAGCGCTTTC TGT  
ATAGTTCCC GTTCAAACAATGTCTTAAGATGTTTATA CAAA GGAAC TTATGAATCGAGTTATA GAAAT  
CCATGCTCACTACGATCAAAGACAAC TTTCTCAATCTC CAAA TACAAA CTCTTAGTACATCATCCTTAT  
CTTACTCTTATTTCCAAGTTTCTACTAGGAGCTCTAATCGTCTATGCTCCTTATTCTGTTTG CAGAAA TGG  
AATTAGCTATTTCTGGACATAAA CAAGGTAAA GATCGAGATACC TTTACCATGATCTTCTCCTGTCTGA  
AGGCACTAATTACATCATCAATCG CAAACTCATACTCAGTGATTTTCTCGTTACTAAATAAGTTTCATCA

GGGGGAGCCTTTCGGAATCTAGCAGGAAAAATTTCTTCTTAGGAAAAAATTTCTTCTGCGTCCATTCATTTAAACACATTAATATCAATGGTTTGGAGCCGGAGTCTTTCTGAATCCTCTATTGAAATTTACTGATTTACGAAAACCTTGTGCTTTTGATCTGAAAGCACAGGAGGAATTTTACTGCAGAAAGAGGACATCTCTTTAAAAACAACCACCACATTGCCTCCGCAATAATATCACAAAAGGAATGGTGGCGTTATCCAGCTCCAAGGAGATATGAAAAGGAAGCGTATCCTTGTAGATCAACGTGGAGCTATCATCTTTAACAATAACCAAGCTGTAACCTTCTCATCAATGAAACATAGTGGTTCGTGGAGGAGCAATTAGCGGTGACTTCGCAGGATCCAGAATCTTTTCTTAATAACCAACAAAATTACTTTCTGAAGGCAATAGCGCTGTGCATGGAGGTGCTATCTACAATAAGAATGGCCTTGTGCGAGTCTTAGGAAATGCAGGACCTCTTGCCTTTAAAGAGAACAACAATAGCTAACGGGGGAGCTATATACACAAGTAAATTTCAAAGCGAATCAAACAAATCCCCATTCTATTCTCTCAAAATCATGCGAATAAGAAAAGCGGAGCGATTTACGCGCAATATGTGAACTTAGAACAGAATCAAGATACTATTCGCTTTGAAAAAAATACCGTAAAGGAGCGGTGGAGCCATCACCTCTTCTCAATGCTCAATTACTGCTCAATAATACCATCACTTTTCGATAATGCTGCCGGAGATCTTGGAGGAGGAGCAATTTCTTAGAAGGAAAAAACCTTCTCTAACCTTGATTGCTCATAGTGGTAATATTGCATTTAGCGGCAATACCATGCTTCATATCACAAAAAAGCTTCCCTAGATCGACACAATTCTATCTTAATCAAGAAGCTCCCTATAAAATCCAACCTTGAGCGAAACAAAACCATTTCTATTCACTTTCTTTGATCCTGTGCATGGCATTGTGAGCATCATCTTCCCCTATACAAACTCAATGCTCCTGAGTATGAACTCCCTTCTTCTCACCTAAGGGTATGATCGTTTCTCGGGTGCAGATCTTTAGATGATGCTAGGGAAGATGTTGCAAAAGAACATCGATTTTTAACCAACCCGTTTCATCTATAAATGGCACCCCTATCTATCGAAAATGGAGCCCATCTGATTGTCCAAGCTTCAACAGACCGGAGGACGTATCAGTTTATCTCCAGGATCCTCCTGGCTCTATACAGATGAACCTCGTTCTTCCATGGCAACATATCCAGCAAGAACCCCTAGAAAATTAATGGTTTAAGCTTTGGAGTAGATATCTCTCCTTCTAATCTTCAAGCAGATCCGTGCCGGCAACGCTCCTTTACGATTATCCGGATCCCCTATCTATCCATGATCCTGAAGGATTATCTACGAAAATCGCGATACTGCAGCATACCATAACAAATGGAAATCTTGCTCACCTCTGATAAAACTGTAGATATCTCCAAATTTACTACTGATTCTCTAGTTACGAAACAAACAATCAGGATTTCAAGGAGCCTGGCATTTAGCTGGCAGCCAAATACTATAAAACAATCTAAACAAAAAATATTAAGAGCTTCTTGGCTCCAACAGGAAGATATGTCCTTGAATCCAATCGAGTGGGGCGTGCCGTTTCTAATTCCTTATGGAGCACATTTTACTTTTACAGACAGCCTCTCATAACTTAGGCGATCATCTATGTAATAATCGATCTCTTATTCCTACTTCATACTCGGAGTTTAAATTGGAGGAACCTGGAGCAGAAATGTCTACCCACTCCTCAGAAGAAAGAAAGCTTTATATCTCGTTTAAAGGAGCTACAGGAACCTCTATCATACGCTTAACTCCCTCCCTGACACTCTCTGGAGGAGGCTCACATATGTTCCGGAGATTGTTTCTGTTGCGAGACTTACCAGAACACATCACCTCAGAAGGAATTGTTGAGAATGTCGGTTTAAACCCATGTCTGGGGACCCCTTACTGTCAATTTCTACATTATGTGCAGCCTTAGATCACAACGGATGGTCCGCATATGCTCCAAAAGATCACACCTATGGGAAATGGGATACATTGGTATGCGAGGAACATAGGGCCTCTTATACATTCCTAGAAATATGATCAAACTATGCGCGTATTCTCATTCGCCAACATCGAAGCACAAAATATCTTGCAAGAGCTTTTACTGAAACAGGCTATAACCCAAGAAGTTTTCACAGAACAACCTTTAAACATCGCCATCCCATAGGGATTGGTTATGAATCTGCTTAGGGAATAGCTCTTTGCTCTACTAGGTAAGGGATCCATCGTTACTCTCGAGATATTAAGCAGAAAACCCATCCACTCTTGCTCACCTGGCTATGAATGATTTTGCTTGGACTACCAATGGCTGTTTCAACCTCTGCACACACATTTGGCAATCAATGATTTCTTCGCTATAAAAGCATGTTCTTATACATCACGGCATATACTATCAACCGTGAAGGGAAGAACCTCCAATAGCTTATCCTGCGGAGGCTATGTTGGCTTCTAATATAACCTTGGAGGTGAACATTTTAAAAACCTCTGTATCTTCCCTAGTAAATTAGGCAAGGAATACCTTGCCCTAAATTTACTTTCTGATTTATCTAACGCCATCGAGTTTCGATACATATTCAATAGGTTGTCTTCTATGAAATGGCTGTGAGCTACTGCGGTGTTGCTGCTGTCTCCCCTCAGTTTCAGGGTTTGTCTTCCAGAACCATAAAGAAATTAATATCGTCTCTAGTAACGCAATCTTTCAAAAATTTACCAACATTCCTACTACCAATAACAACCTCCACGAACTCAAACTCCTCTAGCTCTAACAGAGAGACTGCTTCCGTTTCTAAGGATAGTGACTCTACAACAACGACTCCTGATCCAAAAGGTGGCGGCGCTTTATAACGCGCACTCCGGAGTTTGTCCTTATGACACGATCAGGAACAGAAGGTTCCTTACTCTGTCTGAGATAAAATGACTGGTGAAGGCGGTGCTATCTTCTCTCAAGGAGAGCTGCTATTTACAGATCTGACAGGTCTAACCATCAAAAATACTTATCCAGCTATCCGGAGGAGCGATTTTGGAGGATCTAACATCTCCCTATCAGGGATTACTAAAGCGACTTTCTCCTCAACTCTGCAGAAGTTCTGCTCCTGTTAAGAAACCTCAAAAACCTGAAGCTCAAAACAGCAGGCAGAAAGCTCGGGTCTAGTAGTTCTAGCGGAAATGATTGCGGCTTCTCCTCCAGTTCCAGTAAAGCTGAACCCGAGCAGCTAATCTTCAAGTCTACTTTATTTGTGTCTACAGCTACTCCTGCTGCTCAAAACCGATACAGAAAATCAACTCCCTCTCATAAGCCAGGATCTGGGGGAGCTATCTATGTAAGGCGACCTTACTATCGCAGACTCTCAAAAGGTACTATTCTCAAATAAAAGCTATAAAAGATGGAGGAGCGATTTTGTGAGAAATGTTTCTTTCTGAGAATATTACATCAATAAAAGTACA

AACTAACGGTGCTGAA~~GAAA~~AGGGAGGAGCTATCTATGC~~TAAA~~GGTGACCTCTCAATTCAATCTTC~~TAAA~~  
CAGAGTCTTT~~TAA~~AATCTAACTACAG~~TAAA~~CAAGGTGGTGGGGCTCTATATGTTGAAG~~GAAA~~TA~~TAA~~ACT  
TCCAAGATCTTGAA~~GAAA~~ATTCGCATTAAGTACAA~~TAAA~~GCTGGAACGTT~~CAAAA~~~~CAAAA~~AAAAATCAC~~TTT~~  
~~ACCTT~~~~CAAAA~~AGCTCAAGCATCTGCAG~~GAAA~~TGCAGATGCTTGGGCCTCTTCCTCTCCTCAATCTAGTTCT  
GGAGCAACTACAGTCTCCGACTCAGGAGACTCTAGCTCTGGCT~~CAAA~~CTCGGATACCT~~CAAAA~~AAACAGTTC  
CAGTCACAGC~~TAAA~~GGCGGTGGGC~~TTTA~~TACTGATAAGAATC~~TTTC~~GATTACTAACATCACAGGAATTAT  
C~~GAAA~~TTG~~CAAA~~TAA~~CAAA~~GCGACAGATGTTGGAGGTGGTGTACG~~TAAA~~AGGAACCCTTACTTGT~~TAAA~~  
AACTCTCACCGTCTACAATTT~~TTTGAAA~~AACTCTCCGA~~TAAA~~CAAGGTGGAGGAATCTACGGAGAAGACA  
ACATCACCTATCTAA~~TTTG~~ACAGGGAAGACTCTATTCCAAGAGAATACTGC~~CAAA~~AAAGAGGGCGGTGG  
ACTCTTCA~~TAAA~~AGGTACAGA~~TAAA~~GCTCTTACAATGACAGGACTGGATAG~~TTTC~~TG~~TTTA~~ATTAATAAC  
ACATCA~~GAAA~~AAACATGGTGGTGGAGCC~~TTTG~~TTAC~~CAAAGAAA~~TCTCTCAGACTTACACCTCTGATGTGG  
~~AAA~~CAATTCAGGAATCACGCCTGTACATGGT~~GAAA~~CAGTCATTACTGGCAA~~TAAA~~TCTACAGGAGGTAA  
TGGTGGAGGCGTGTGTA~~CAAAA~~ACGTCCTTGCCCTTATCTAACCTT~~CAAA~~GCATTTCTATATCCGGGAATTCT  
GCAGCA~~GAAA~~ATGGTGGTGGAGCCTACACATGCCAGATAGCTTCCCAACGGCGGATACTGCAGAACAGC  
CCGCAGCAGCTTCTGCCGCGACATCTACTCCCGAGTCTGACCCAGTGGCCTCAACTGCTCTAAGCACACC  
TTCATCTTCTACCGTCTCTTCATTAACCTTACTAGCAGCCTCTTCACAAGCCTCTCCTGCAACCTCTAAT  
GAG~~GAAA~~ACTCAAGATCCTAATGCTGATACAGACTTATTGATCGATTATGTAGTTGATACGACTATCAGCA  
~~AAA~~ACACTGCTAA~~GAAA~~GGCGGTGGAATCTATGC~~TAAA~~AAAGCCAAGATGTCCCGCATAGACCAACTGAA  
TATCTCTGAGAACTCCGCTACAGAGATAGGTGGAGGTATCTGCTG~~TAAA~~AAATC~~TTTAAA~~ACTAGATGCT  
CTAGTCTCCTTATCTGTAACAGAGAACCCTTGGTGG~~GAAA~~GAAGGTGGAGGCTTACATGC~~TAAA~~ACTGTAA  
~~ATATTTTC~~TAATCT~~GAAA~~TCAGGCTTCTC~~TTTC~~TCGAACAAC~~CAAA~~G~~CAAA~~CTCCTCATCCACAGGAGTCGC  
AACAAACAGCTTCAGCACCTGCTGCAGCTGCTGCTTCCCTACAAGCAGCCGAGCAGCCGACCATCATCT  
CCAGCAACACCAACTTATTCAGGTGTAGTAGGAGGAGCTATCTATGGAGAACAGTTACATTTCTCTCAAT  
GTAGCGGGACTTGTGAGTTCTCTGGGAACCAAGCTATCGATAACAATCCCTCCCAATCATCGTTGAACGT  
ACAAGGAGGAGCCATCTATGC~~CAAA~~ACCTCTTTG~~TCT~~TATTAGATCTTCCGATGCTGGAACCTCCTATAT~~T~~  
~~TTTC~~TCGGGAAACAGTGTCTCCACTGG~~GAAA~~TCT~~CAAA~~CAACAGGG~~CAAA~~TAGCGGGAGGAGCGATCTACT  
CCCCTACTGTTACATGAATTGTCTGCGACATTTCTTAACAATACAGCCTCTATGGCTACACCGAAGAC  
TTCTTCATCCTCAG~~GAAA~~TTCTAT~~TAAA~~GATACCATTTGGAGGAGCCATTGCAGGGACAGCCATTACCCTA  
TCTGGAGTCTCTCGAT~~TTTC~~CAGGGAATACGGCTGA~~TTTA~~AGGAGCTGCAATAGGAACTCTAGCTAATG~~CAA~~  
~~ATAC~~CCCAGAGCAACTAGCGGATCT~~CAAAA~~ATAGCATTACAG~~GAAA~~AAATTACT~~TTTAAA~~AAACAGTTCTTT  
~~TATTT~~~~TTTGAAA~~G~~GAAA~~CCAAGCTAA~~TAAA~~CGTGGAGCGA~~TTTA~~CTCTCCTAGCG~~TTTC~~CATT~~TAAA~~GGAAT  
AATATTACCTTCAAT~~CAAAA~~ATACATCCACTCATGATGGAAGCGCTATCTACT~~TTTACAAA~~AGATGCTAAGA  
TTGAGTCT~~TTTAGG~~ATCTGTTCTTT~~TTA~~CAG~~GAAA~~TAAAGTTACAGCTACACAAGCTAGTTCTGCAACATC  
TGGAC~~CAAAA~~ATA~~CAAA~~TACTGCCAACTATGGGGCAGCTATC~~TTTG~~GAGATCCAGGAACCACTCAATCGCCT  
~~CAAA~~CAGATGCCAT~~TTTA~~ACCCTTCTTGCTTCTCTG~~GAAA~~CATTACT~~TTTAG~~CAACAACAG~~TTTA~~CAGA  
ATAACCAAGGTGGTACTCCCCTAGCAAGT~~TTTG~~TAGTATTGCAGGATACGT~~CAAA~~CTCTC~~TTTA~~CAAGC  
CAC~~TAAA~~GGGAAGACTATTAGCTT~~TTTC~~GATTGTGTGCACACCTCTAC~~CAAAA~~AAACAGGTTCAACA~~CAA~~  
~~AACG~~~~TTTAT~~~~GAAA~~C~~TTTAG~~ATATTA~~TAAA~~AAAGAGAACAGTAAGCCATATACAGGAACTATTGTGTCT  
CTTCTGAATTACAT~~GAAA~~~~CAAA~~TCTTACATCCCACAGAATGCAATCCTTCAACAGGAAC~~TTTAG~~GTCT  
~~TAAA~~GAG~~GAAA~~ACAGAAC~~TCC~~ACGTAGTCTCT~~TTTG~~AGCAG~~GAAA~~GAAGGGTCT~~TAAA~~TTAATTATGGAACCC  
GGAGCTGTGTTATCTAAC~~CAAAA~~ACATAGCTAACGGAGCTCTAGCTATCAATGGGTTAACGATTGATCT~~TTT~~  
~~CC~~AGTATGGGGACTCCTCAAGCAGGG~~GAAA~~TCTTCTCTCCTCCAGAATTACGTATCGTTGCCACGACCTC  
TAGTGCATCCGGAAGAAGCGGGTCAAGCAGGAGTATACCAA~~CAAA~~TCC~~TAAA~~GGGA~~TTTC~~TGCAGCAGCG  
CCTTCAGGTTCTGCCGCAACTACTCCAATATGAGCGAGAA~~CAAA~~GT~~TTTC~~CCTAACAGGAGACCTTACT~~TT~~  
~~TA~~ATAGATCCTAATG~~GAAA~~ACT~~TTTA~~T~~CAAAA~~ACCCTATGTTAGGAAGCGATCTAGATGTACCACTAATTA  
GCTTCCGACTAACACAAGTGACGTCCAAGTCTATGAT~~TTTA~~AC~~TTTA~~TCTGGGGATCT~~TTTC~~CCTCAG~~GAAA~~  
GGGTACATGGGAACCTGGACAT~~TAAA~~TTCTAATCCA~~CAAA~~CAGG~~GAAA~~CTTCAAGCCAGATGGACATTTCG  
ATACCTATCGTCTGCTGGGTATACATACCTAGGGATAATCATT~~TTTA~~TGCGAACTCTATCTTAGGCTCC~~CA~~  
~~AA~~ACTCAATGATTGTGTGAAGCAAGGGCTTATCAACAACATGTTGAATAATGCCCGCTTCGATGATATC  
GCTTACAATAACTTCTGGG~~TTTC~~AGGAGTAGGAAC~~TTTC~~TTAGCTCAACAAGGAAC~~TCTC~~~~TTTC~~CGAAG  
AATTCAGTTACTACAGCCGCGGAAC~~TTC~~AGTTGCCATCGATGC~~CAAA~~CCTAGACAAGAT~~TTTA~~TCC~~TAGG~~  
AGCTGCA~~TTTA~~GTAAGATGGTGGG~~GAAA~~AC~~CAAA~~GCCAT~~CAAA~~AAAAATGCATAATTACTTCCATAAGGGC  
TCTGAGTACTCTTACCAAGCTTCTGTCTATGGAGG~~TAAA~~TTCTCTGTA~~TTTC~~TTGCTCAATAAGCAACATG

GTTGGGCACTTCC TTTCTAATACAAGGAGTCGTGTCCTATGGACATAT TAAA CATGATACAACAATACT  
TTA CCCTTCTATCCAT GAAAGAAATAAA GGAGATTGGGAAGA TTTA GGATGGT TAGCGGATCTTCGTATC  
TCTATGGATCT TAAA GAACCTTC TAAA GATTCTTC TAAACGGATCACTGTCTATGGGGAACCTCGAGTATT  
CCAGCATTGCCA GAAA CAGTTCACAGAAA TCGATTACGATCCAAGACACTTCGATGATTGTGCTTACAG  
AAA TCTGTGCTTCCGTGGGATGCGCTGTGCAAGGAGCTATCATGAAGTGAATATTCTTATGTATAAT  
AAGCTTGCATTAGCCTACATGCCTTCTATCTACA GAAA TAATCCTGTCTG TAAA TATCGGGTATTGTCTT  
CGAATGAAGCTGGTCAAGTTATCTGCGGAGTGCCAAC TAGAACCTCTGCTAGAGCAGAATACAGTACTCA  
ACTATATCTTGGTCCCTTCTGGACTCTCTACG GAAA CTATACTATCGATGTAGGCATGTATACGCTATCG  
CAAA TGACTAGCTGCGGTGCTCGCATGATCTTCTAATTCTT TTTG GCCAGCCTCTT CAAAAGGCTGGCC T  
TTACGATCTCTTAATA CAAAGAAA ACCCCTCTTACATATCTCTCTAGGCCTT TTTG GGGCTTATA GAAAAC  
TTGATTTTT TTTCA TTTA TGATCTATTCAATACCTATCATCGTAGGTTGTTCAATTAGGTTA TTTAAA TT  
AT GAAA TTTCTGTGCTACTGCTGTA TTTG CTGCAGTACTCTCTCCGTTACTGAGGCGAGCTCGATCC  
AAGAT CAAATAAA GAATACCGACTGCAATGTTAG CAAA GTAGGATATTCAACTTCTCAAGCAT TTTA CTGA  
TATGATGCTAGCAGACAACACAGAGTATCGAGCTGCTGATAGTG TTTCA ATTCTATGACT TTTG GACATCT  
TCCGGATTACCTA GAAA ACATCTTAGTAGTAGTAGTGAAGCTTCTCCAACGACAGAAGGAGTGTCTTCAT  
CTTCATCTGGAGAAA AACTGAGAATTCACAAGATTCAAGCTCCCTCTTCTGGAGAAA CTGATAA GAAAAC  
AGAAGAAGAACTAGACAATGGCGGAATCA TTTA TGCTAGAGAGAAA CTAATCTCAGAATCTCAGGAC  
TCTCTCTAATCCAAGCATAGAACTCCATGACAATAGTTT TTTCTTCGGAGAAGGTGAAGTTATCT TTTG  
ATCACAGAGTTGCCCT CAAAACCGGAGGAGCTA TTTA TGAGAGAAA GAGGTAGTCT TTTGAAAACA TAAA  
ATCTCTACTAGTAGAAG TAAA TATCTCGGTGCA GAAA GGGGTAGCGTCTATG CAAAAGAACGAGTATCT  
TTAGAAA ATGTTACC GAAGCAACCTTCTCCTCCAATGGTGGGGAACAAGGTGGTGGTGAATCTATTTCAG  
AACAGATATGTTAATCAGTGATTGCAACAATGTACA TTTCT CAAGGGAATGCTGCAGGAGCAACAGCAGT  
AAA ACAATGTCTGGATGAAGAAA TGATCGTATTGCTCACAGAATGCGTTGATAGCTTATCCGAAGATACA  
CTGGATAGCACTCCA GAAACCGAACAGACTAAGT CAAA TGAAA TCAAGATGGTTCGTCTGAAA CAAAAG  
ATACACAAGTATCAGAATCACCAGAATCAACTCCTAGCCCCGACGATGT TTTAGG TAAAGGTGGTGGTAT  
CTATACA GAAA AATCT TTTG ACCATCACTGGAATTACAGGGACTATAGAT TTTG TCAGTAACATAGCTACC  
GATTCTGGAGCAGGTGTATTAC TAAAGAAA ACTTGTCTTGCACCAACACGAATAGCCTACAGTT TTTGA  
AAA ACTCGGCAGGTCAACATGGAGGAGGAGCCTACGTTACT CAAA CCATGTCTGTTACTAATACAAC TAG  
TGAAA GTATAACTACTCCCCCTCTCGTAGGAGAAGTGAT TTTCTCT GAAAATACAGC TAAAGGGCACGGT  
GGTGGTATCTGCACTAA CAAAC TTTCTTTATCTAA TTTAAA AACGGTGAAGTCTCAC TAAAACTCTG CAA  
AGGAGTCTGGAGGAGCTATTTTTCAGATCTAGCGTCTATAACCAACAACAGATACCCAGAGTCTTCTAC  
CCCCCTTCTCCTCGCTGCAAGCACTCCCGAAGTAGTTGCTTCTGC TAAAATAAA TCGATTCT TTTGCC  
TCTACGGCAGAACCGGCAGCCCCCTCTCTAACAGAGGCTGAGTCTGAT CAAA CCGAT CAAACAGAAA CTT  
CTGATACTAATAGCGATATAGACGTGTGATTGAGAACAT TTTGAATGTGCTATCAAT CAAAACACTTC  
TGC GAAA AAAGGAGGGGCTATTTA CGG GAAAAAAGC TAAACTTTCCGTTAACAATCTTGAAC TTTCA  
GGGAATTCATCCCAGGATGTAGGAGGAGGTCTCTG TTTA ACT GAAA CCGTAGAA TTTGATGCAATTGGAT  
CGCTCTTATCCC ACTATAACTCTGCTGC TAAA GAAGGTGGGTATTTCATTCT TAAAACGGTTACTCTATC  
TAACCTCAAGTCTACCTTCACT TTTG CAGATAACACTGT TAAA GCAATAGTAGAAA GCACTCCTGAAGCT  
CCAGAAGAGATTCTCCAGTAGAAGGAGAAGAGTCTACAGCAACA GAAA ATCCGAATCTAATACAGAAG  
GAAGTTCGGCTAACACTAACCTTGAAGGATCTCAAGGGGATACTGCTGATACAGGGACTGGTGTGTTAA  
CAATGAGTCTCAAGACACATCAGATACTG GAAA CGCTGAATCTGGAGAACAAC TACAAGATTCTACACAA  
TCTAATGAAGAAA ATACCCTTCCCAATAGTAGTATTGATCAATCTAAC GAAA ACACAGACGAATCATCTG  
ATAGCCACACTGAG GAAA TAACTGACGAGAGTGTCTCATCGTCTCT TAAAAGTGGATCATCTACTCCTCA  
AGATGGAGGAGCAGCTTCTTCAGGGGCTCCCTCAGGAGATCAATCTATCTCTG CAAA CGCTTG TTTAGCT  
AAA AGCTATGCTGCGAGTACTGATAGCTCCCCTGTATCTAATTCTTCAGGTT CAGACGTTACTGCATCTT  
CTGATAATCCAGACTCTTCTCATCTGGAGATAGCGCTGGAGACTCTGAAGGACCGACTGAGCCAGAAGC  
TGGTCTTACAACA GAAA CTCTTAC TTTA ATAGGAGGAGGTGCTATCTATGGA GAAA CTGTTAAGATTGAG  
AACTTCTCTGGCCAAGGAATAT TTTCTG GAAACAAA GCTATCGATAACACCACAGAAGGCTCCTCTTCA  
AA TCTAACGTCCTCGGAGGTGCGGTCTATGCTAAA ACATTG TTTA ATCTCGATAGCGGGAGCTCTAGACG  
AACTGTCACCTTCTCCGGGAATACTGTCTCTTCTCAATCTACAACAGGTCAGGTTGCTGGAGGAGCTATC  
TACTCTCCTACTGTAACCATTGCTACTCCTGTAGTAT TTTCTAAA AACTCTGCAA CAAA CAATGCTAATA  
ACGCTACAGATACTCAGA GAAA AGACACC TTTG GAGGAGCTATCGGAGCTACTTCTGCTGTTTCTCTATC  
AGGAGGGGCTCA TTTCTTAGAAA ACGTTGCTGACCTCGGATCTGCTATTGGGTTGGTGGCAGACACA CAA



AATACAGAAACAGT GAAATTAGAGTCTGGCTCCTACTACT TTTGAAA AAAATAAA GC TTTAAAACGAGCTA  
CTA TTTACGCACCTGTCG TTTCCAT TAAAGCCTATACTGCGACA TTTAAC CAAAACAGATCTCTAGAAGA  
AGGAAGCGCGA TTTAC TTTACAAA AGAAGCATCTATTGAGTCT TTTAGGCTCTGTTCTCTTACAG GAAAC  
TTAGTAACCCCAACGCTAAGCACAAC TACAGAAGGCACACCAGCCACAACCTCAGGAGATGTAA CAAAAT  
ATGGTGCTGCTATC TTTGGA CAAA TAGCAAGCT CAAA CGGATCTCAGACGGATAACCTTCCCCT GAAACT  
CATTGCTTCAGGAG GAAATATTTGTTTC GAAA CAATGAATACCGTCTACTTCTTCTGATACCGGAACC  
TCTACT TTTCTGTAGTATTGCGGGAGATGT AAAA TTAACCATGCAAGCTG CAAAAGG GAAAACGATCAG TT  
TCTTTGATGCAATCCGGACCTCTACTAA GAAA ACAGGTACACAGGCAACTGCCTACGATACTCTCGATAT  
TAATAAA TCTGAGGATTCA GAAA CTG TAAACTCTGCG TTTA CAGGAACGATTCTGTTCTCCTCTGAATTA  
CAT GAAAATAAA TCCTATATTCCA CAAAACGTAGTTCTACACAGTGGATCTCTTGTATTGAAGC CAAA TA  
CCGAGCTTCATGTCA TTTCTTTTGAGCA GAAA GAAGGCTCTTCTCTCGTTATGACACCTGGATCTGTTCT  
TTG GAACCAGACTGTTGCTGATGGAGC TTTGGTCA TAAA TAACATGACCATTGA TTTA TCCAGCGTAGAG  
AAAAATGGTATTGCTGAAG GAAA TATC TTTA CTCTCCAGAATTGAGAATCATAGACACTACTACAAGTG  
GAAGCGGTGGAACCCCATCTACAGATAGT GAAA GTAACCAGAATAGTGATGATACCAAGGAG CAAA ATAA  
TAATGACGCCTCGAATCAAGGA GAAA GCGCGAATGGATCGTCTTCTCCTGCAGTAGCTGCTGCACACACA  
TCTCGTACAAGAAA TTTG CCGCTGCAGCTACAGCCACACCTACGACAACACCAACGGCTACAAC TACAA  
CAAGCAACCAAGTAATCCTAGGAGGA GAAAT CAAA CTCATCGATCCTAATGGGACCTTCTTCCAGAACCC  
TGCATTAAGATCCGACCAA CAAA TCTCCTTGTAGTGCTCCCTACAGACTCAT CAAAATGCAAGCTCAG  
AAAATAGTACTGACGGGTGATATTGCTCCTCAGAAA GGATATACAGGAACACTCACTCTGGATCCTGATC  
AACTA CAAAATGGAACGATCTCAGCGCTCTG GAAATTTGACTCTTATAGACAATGGGCTTATGTACCTAG  
AGACAATCAT TTTCTATGCGAACTCGATTCTGGGATCT CAAA TGTC AATGGTCACAGT CAAA CAAGC TTG  
CTCAACGA TAAAATGAATCTAGCTCGC TTTGATGAAGTTAGCTATAACAACCTGTGGATATCAGGACTAG  
GAACGATGCTATCGCAAGTAGGAACACCTACTTCTGAAGAATTCACTTATTACAGCAGAGGAGCTTCTGT  
TGCCTTAGATGC TAAACCAGCCATGATGTGATTGTTGGAGCTGCA TTTAGTAAGATGATCGG GAAAACA  
AAATCCTT GAAAAGAGAGAATAACTACACTCACAAA GGATCCGAATATTCTTACCAAGCATCGGTATACG  
GAGG CAAACCATTCCAC TTTGTAATCAA TAAA AAAACG GAAA AATCGCTACCGCTATTGTTACAAGGAGT  
CATCTCTTACGGATATAT CAAA CATGATACAGTGACTCACTATCCAACGATCCGTGAAC GAAA CCAAGGA  
GAATGGGAAGACTTAGGATGGCTGACAGCTCTCCGTGTCTCCTCTGTCTTAAGA ACTCCTGCACAAGGGG  
ATAC TAAACGTATCACTG TTTA CCGAGAATTGGAATACTCCAGTATCCGTCA GAAA CAATTCACAGAAAAC  
AGAATACGATCCTCGTTACTTCGACA ACTGCACCTATA GAAA CTTAGCAATTCCTATGGGGTTAGCATT  
GAAGGAGAGCTCTCTGGAACGATAT TTTGATGTACAACAGATTCTCTGTAGCATA CATGCCATCAATCT  
ATC GAAA TTCTCCAACATG CAAA TACCAAGTGCTCTCTCAGGAGAAGGCGGAGAAA TTTATTTG TGGAGT  
ACCGACAAGAAA CTCAGCTCGCGGAGAATACAGCAGCTGTACCCGGGACC TTTG TGGACTCTGTAT  
GGATCCTACACGATAGAAGCAGACGCACATACTAGCTCATATGATGAAC TCGGTGCTCGTATGATAT  
TC TAAATAAATATCCTG GAAA GGCAGCTCTCGCAAGGGCTGCCTTCTAGGAATCCCTGCCTCCA GAAAAC  
AACTCTTGTCTCAC TAAAAAATCACAACAGAAT CAAA CAAA AAAAAGACACACTTGCAGAGGTGAGGG  
CCACGCGAG CAAA TGTGTCAGACGGAGAGAGGGATTTCGAACCC TCGGTACGCGTTAACGCACACACGC  
TTTC CAAGCGTGCTCCTTAAAGCCACTCGGACATCTCTCCAA GAAA CAAA CTACTACTCTC CAAA CAACT  
CGGTATCGCCGG CAAA AAGACAGTAGAAA GAACATTTCTTAGTT TTTAAGAT TTTA TCTCCAGCTTTT  
TC GTACAATTTTGCTTTTCTTTAAA AAACGTTCCTCACCCGTTTCTAAA GCTTCTCTGCTCTGAA  
CCCCATATTACT TAAAAAATTTATATGTGAATGA TTTAACGCGA TTTCC TAAA GAA TAAAATTG TTTGGA  
AGACAAGCCATTGAA CAAAATTACTCAACAATAGAATAATGGTTCGTTGTTAATAT TTTAAGATAATATG  
CG TTTACTCTTTTACTCCTCT TTTCTTTGGGGATCACTTGTTCCTATGGAGACGAGG TTTCTACTCGCA  
AGCAGAT TTTGGTCAGCATTGTCCCTATAAA TTTCTTGTGGAA CAAATCGCGGGGATACCTGTCAGGT  
GTTCTCTATTGTTATGGATAACCATGACCCTCATAACTATGAGC TTTCCGCC TAAA TATATAGAAAAGATC  
CGCCAGGTTGAAC TTTGGTTTGAATTTGGTGAGGGATTTGAAAAA ACTTGTGAGAGAATTA TTTCTGTGCA  
AGCAAGTAGATCTAGCAG CAAAATATCGA TAAAATTA CAAATGGGGCCTGCTGCCAGCGT TTTCTTAGTT  
TGATACCCACACCTGGTTAAGTCC TAAA AACC TAAA AATT CAAA TCCAGGCCATTACAGAAGC TTTA GTG  
GAGACCGCCCCTGAACAC GAAA CTCTGTACCG TAAA AACTGTTCTCTATTACAGTCTCAACTAGATCT TT  
TGGAT CAAAAGAT TTTCTTCTATTG TTTCTAGTACATCACAACGCAATGTTCTAGTTACCCACGGAGCT TT  
TGCTTATTTCTGTAGAGATTACGGC TTTATACAACATACTATCGAGCGAGCTAACC ACTCAGAGTTATCT  
CC TAAA GATGTTGTTCTGTGTAGAGCGAACCATTCTGTGATCACAACCTTGC ACTCTGTAAT TTTGCTCAAGC  
ATGCGGGG GAAA CGTAGTAGCGCCGCTTAGTACGGAAG TTTA ATATGACGCCTATTTCTATTGGATCCCTA

TGCTGAAGATGTCTTCAATAA**TTTA**CTAGCTATCGCAACGGCT**TTTG**CAAA**TCTATGA**CAAAA**CAAA**TGC  
TATTAGAGAATGTGTCCTTCCGCTATGG**GAAA**ACCGGTCCCCTAATTGTTGACCACGTCTCCTGCGAAGT  
CTATTCGGGGA**TTTC**ATTGGAATTATTGGGCCAATGGAGGGG**GAAA**AACAAC**TCTCACCCA**ACTCATG  
CTGAGATTATTACAACCGGTGTGTGGAAGCATCTCTACCTATTCTGTACAAGATCATCGCCCTCTATCCA  
TAGGTTGGGTTCCCAACATT**TTTC**CTATGATGCAGCA**TTTC**CTATCACTG**TAAA**G**GAAA**ACTGTTCTGTC  
TGGAAGGTTGGCGACACTGCCTTGGTATGGACGTTATACACAAGAAGATCATGAAGCTGCTGAAGAAGCC  
CTTCTTACCCTTGGATCTGATAGATTA**TAAAG**ACTCTTGCT**TTTC**CCA**TTTG**TCAGGAGGC**CAAA**TTCAAC  
GTGTTCTCCTAGCTAGAGC**TTTG**GCTGCGCGTCTGAATTCT**TTTG**TTAGATGAGCCACAGCCAATAT  
CGACCCCGTCAATCAA**CAAAAA**ATCTTACAGATTC**TTTC**CGCTCTGAA**TAAA**CACTGCACTATCCTCATG  
ATCACTCATGATCTGCACCACACAGCAGGTTG**TTTC**AATCGAGTCTT**TTTC**ATGAA**TAAA**ACTAACA  
C**TTTA**GCAGACACCCTACAAT**TTTC**AG**GAAA**GATTTCTGCTGCAACACT**TTTG**GGAGATGCCCATGATCTCT  
ATTCTCTGTT**TTTG**TTCCCGCCTCTTCTATTCCCTTCGCTGCTGGCGGCT**TTTC**GGCGCCTCCATTGCTG  
CAGGAATCGTAGGCTCTTATATTGTAGT**GAAA**CGCATTGTGTGCGATTAGTGGAAGCATAGCACATTCCAT  
TCTAGGAGGAGTTGGTATCGCCCTATGGCTTCAATACCA**TTTA**ATCTCCCTATATCCCCTACTACACGGG  
GCTATTGCTAGTGCTATCTTCGTAGCGATCTGTATTGGGAATGTCCATCT**TAAA**TACCATGAACGCGAAG  
ACTCCATCA**TTTC**TATGATCTGGTCCATTGGTATGGCTATAGGCATTATATGTATATCTAAGCTCCCTTC  
C**TTTA**ACTCAGAGCTCTCTGAT**TTTC**TT**TTTG**GCAATATCTTATGGGTCACCCACAAGATC**TTTATTTT**  
CTTGGGATCCTAGATCTG**TTTA**TCGTTGCTACCGTATCCAT**TTTG**TCACACACGATTCCTTAGCCCTATGCT  
TCGATGA**GAAA**TACATGGCGTTGAATCATTACTCCA**TAAA**AACTTGGTACCTATTGCTGCTTATCTTAA  
AGCAATTACGACTGTTGTTCTTATGTATGTCATGGGAGTTATTCTAATGTTGAGCATGTTAGTCCCTCCA  
GTATCAATAGCCTGTCG**TTTC**TCC**TAAA**ATGAGCCACATCA**TTTA**CATCGCATCTATCT**TAAA**TATCG  
TCTGCTCATTCCCTAGGAATTATGCTTGCTTATCTCCTAGACTTGCCAGTTGGGCTGTCTATAGCGATTCT  
CATGGGAGGAGCTTACTCACTGAG**TTTA**CTCTTGAACAGATCATAACAATGCATCTACCCCTTCTCCTGTC  
AGCCCT**GAAAG****CAAA****TAAA**TTCTTGATCAGGGA**CTGCTG****TTTA**AGAAGAGCTACACGTTCTTCGCGCT  
CATCAGGCAGTAGCTGATCGATCTTA**TTTAAA**GCGATGACCATGTC**TTTATCC****TTTAG**CTCTTC**TTTG**TA  
AGCCAAGAGCTCCCCATTAAGAT**TTTA**AGATCTTGTTCGGGTGAGTGTCT**TTTC**TATTCCAGAGATATCG  
ATTACGAATAACAGTAATCGCGTACGTTCAATATGCCGAAG**GAAA**TCCAATCCAATCCCCGGT**TTTG**CG  
ACGCTCCTTCAATAATTCCTGGAATATCTGCCATGATCCAAGTTT**TTTG**ATAGAGCATTCCCTCTTGATG  
AAC**CAAA**CCAATGAAGGATGTAGCGTGG**TAAA**CGGATAGGCACCGAC**TTTC**ACTTCTGTACGTGCAAGA  
GTGT**TAAA**TAAGGTTGAT**TTTA**CCAGCGTTAGGGAATCCAACGAGACCGATATCAGCTATTAAT**TTG**AGTT  
CCAGTTCAACCAAGCGAA**TTTC**TCCAG**TTTA**CCTGGAGTAGCT**TTTG**TTGGAGCTCGGTTAGTCGATGT  
**TTTAA**G**AAAA**ACATTCCTTACCTCCTCTGCCTCCCTGACAGACAACAATACGTTCCACCATCCTTG**GTG**  
**AAA**TCGTGTATCAATCTCCAGTGGCTGCATCCCGTAAGAGAGTCCCCTCAGGA**ACTTTTA**ATACTAAGT  
C**TTTA**CCG**TTTC**TTCTGTACGATTATTACTAGCACCGGCTTGCCCATCATCAGC**TTTAAG****GAAA**CGAAG  
ATTACGGTATTCTT**CAAA**TGAATACATATTTCGTCAGT**TTTC**GATAAGAATAGAGCCCCATTCCCCCA  
TTACCGCCGTAGGGGCTCC**TTTG**GGGAGATA**TTTC**TCT**TTTC**TCCAAGCTACAACACCATTACCGC**TT**  
**TC**CCGGCGCGCAACTCTAATGTAA**TTTG**ATCAA**CAAA**CATGACTCGTCCCTGGAA**CAAA**CAAAAAAGCCC  
TATT**TTTA**CGCGTAGG**CAAAA**ACAGAGCTTGAA**CAAA**CTGAATTA**TAAATAAAA**ATGA**ACTAAG**CTTG**TG**  
GGATAACAG**AAA**CGTAAGTACGATCTGTTTT**TTTC**ATTACAACGATA**CCATCCG**CTAATG**CAAA**TAACGT  
ATCGT**TTTC**CCCC**TACCA**ACG**TTTA**CTGCAGGATGCCA**TTTG**GTTCCCTCGTTGTCTAAC**CAAA**ATGCTT  
CCAGTAG**AA**ACTCTCTGCCCTGCGCCAAC**TTTC**AA**CCCA**AGACGC**TTTG**ATT**CGGA**ATCGCGACCGTTAC  
GGCTTGCTCCCTGACC**TTTC**TTATGTGCCATGACT**CAAAA**ATCC**TTTA**TGTTCCCTACAAT**TTA**CATAAC  
**CAAA**TCGCTAATCTT**CACCC**GAAGGTAAT**TTTG**ACGATGGCCGAT**TTTC**TTGTGGTAATCTTACGTTTT**T**  
**TTG**TACTTGTAAAGCCACAACCT**TTTC**TCCGCGAAC**GAAAGAAA**CTAATCTCC**TTTC**ACTACAGCGTTGC  
CAACTGTTGGAGC**CAAA**CGGAAGCT**TTTC**TCCGT**CAAA**AG**TAAA**TAATACATCTT**GAAA**AAGGACTTC  
**TTTG**TTCTCTTCA**GAAA**TTCCATCCAACAGTTTCGACGTCTATAACGTCACC**TTTG**CGAACCTGGTATTGC  
TTA**TTTC**CAGTCTGAATTACAGCGTAAGGCTCCATCAATTC**TTTC**CCTA**TAAA**C**TTTA**CTTGT**GAA**ACT  
CTCCATTCTAGAAGGAAGCGCCTGACTTGGCCGGAGAGCCCTGT**TAGCG**CTTAAGGACACACCATCCC  
AAGCGAACAA**CAAA**TATAACTACTTCCACTATATTC**GAAA**AGACTTGTCCCTTT**TTTC**TTA**TTTG**GGAC  
ATGAG**CAAA**ACAACACAAGCGGCTTGTA**GAAA**TCTTCTA**ACTCT****TTTG**CG**CAAA**TGT**GAAA**TCTGT**CA**  
**AAAAAA****TTTA**GAGAGTCTCCGT**CAAA**ACTCTC**TAAA**CGCCATTAGCGGACATA**CCCG**CATACTCATGGG  
ATGGCCAGAGCCGGGATCGA**ACCG**ACGACACAAGGATCTT**CAGT**CTCTGCTCTACCAGCTGAGCTATCT  
AGCCATACACGGGGCTAT**TTTA**GAG**GAAA**TACCCGC**TTTAAA**TCAATGAT**TTTC**TTAACATGCACCT**TTT**

CTTTGAAACTCGTTTAAAATTCTCGTGAGAAA AACCTCTTCTATAGACCGTTC CAAAAACGCATTAC  
AAGTTATAGAGGATTTAGCTATAGTTGCGCCTAGGATTCCAAGAGAGCGGGAATCCCCAGC CAAA GGAG  
CTTGTTATGAAA AAGCATTTTA TTACCGGCC TAGTTATTCTCTCCC TTTA GCGATTACCATTGCAGT  
CGTAGGGATGATTATGAATTTTC TTACACAACCCTTCGTTGGCATGGTATCCGATGTGTTC GAAAAATTT  
AGTTTC TATAC CAAA TACCGAGC TTTCTTAGACTTGGTCTA CAAA TTGTA CTCTATTCCGACT TTTCT  
TTACCACAGTTCTCCTAGGCTTCTTGCTCGCCTTATGAT TTTCAAATC TTTG TTGTCCGTGTACGCAA  
AATCCTGCACAGAATCCCAATCAT CAAA ACAGTGTATAAGGCTGCTCAACAGGTCATGACAACAATCTTT  
GGGTCTCAATCAGGATCC TTTAAA CAAGTGGTTATGGTGCC TTTTC CTAATAGGGAGGTCTTATGTATTG  
GTCTGGTGGCCGGAGAAGCTCCAACCACATGCTCACAGGATGCTGACGATCCTATGATTACCGTA TTTAT  
CCCAACTACTC CAAA TCCTACTTCAGGG TTTCTCAGCTATT CAAA AAATCTGACATTACTTT TTTG GAT  
ATGAAA ATCGAAGACGCC TTTAAA TATGTAATCTCTTGTGGAGTAT TAAACTCAGATCCCTGCGCTACCT  
CACC TTTCA TACACCACAGTCTTAGTCCCCCTAATCATTATCTTCTTT TTTAAA AAGAAGGGAA TTTAGT  
GGGAACCAGACTCATAGCTCTATT GAAA AAAAAACGGCGCTCTACTATTCTGTTC TTTTCATAAGCAACA  
GCAGAGTTGCTAT TTTCTTTTAAA TCCCTTCCCATTCAGGAAGGCAGAAGGATCTTGTTGGGTTAT TTT  
ATGACACGAATGAG TAAA CAAGCTCGCCGTAGAGCT CAAAGTC CAAA AAAACGCAAGCCCG TTTATGCTG  
TTCAGCATCCACAAGATGCTTCAAGAATTGCT TTTAAGGCCCACACTAACACAG CAAAAGGTGTTGGCGT  
TTTTG TTTCT CAAA TTGGTTAATTATTAGAGAAA TAACATGTCTAGACATCGTAGTTACGGGAAGTCCGT  
CAAGGGAGAGACTAAGA GAAACGTTCTTAAAGCGT TTTGAGCGCATCGAAGTGTACG TAAA TTAGGACGC  
TGGGACGATGCTACTGC TAAA AAAAGCCACAGGGCTTCTTAAAGACTCCTGTAATCAAGTAAGTTATATTTT  
TTTTG CTTAT TTTG GATCGATCTTCTCCT CAAA TT TTTATTTCTAACGAACAACAAGATGTTAGCATAGA  
TTTACAATCTGCTCAGCGTCTTGTGTTCTGTT TTTGGAACTA CAAA AAGTTTCTACAGATCAGGTGTAT  
GTTTAT TTTCTAGACGACACAGCTCTTGCTCAGCTCCATGACGAGCAAT TTTCTGATCCTTCCCTAACAG  
ATACCATTACTCTTCCCATAGATAAGCCTGGAATTGCTTCC TTTCTCATGTTT TAGGAGAAGCT TTTGT  
AAGCCC TAAAGCAGCTATGCGATTCTTGAACAATATACCGAAGCCAATTGTATCAT GAAA TCTCGCGC  
TATGTCGTCCACTCCTTACTGCATATGCTAGGGTATGATGAT CAAA CCGATGAAGA CAAACGCATCATGC  
AAGAACAGGAAGATGTATCCC TTTCTTT TTTAGCTGAACACCAGGCGTTATTACGTCCTGCAGTA TAAAA  
GTCTTCGCTTCCCTCTA GAAATCTCTATATCGA TAAA AATTTTATCGTAACATGCAAGTAAGCCTCGAG  
TCTT TTTGTGGACTCTCCCAATAA TTTCTTTTACAGGAGCTGGCTT TTTTCGCCCTCATCATGCTATATA  
TTCTGCTGGCTATTATCGTTCTTT TTTCTTTCTCGGCTCAGCAACTCACCGCAGAGCCTCTAT TTTACG  
ATACGGAGGAGAAGCCTTCCCC TTTCTCTTCTGTCC TAAAGTTCTTCTCTCC TTTGTTTAA TTTAC  
GGAATGCTTGGAGCCCCAGTCTACCAGTACATCCATAACTTCTTCTCTGTCTCCCTCAATTT TTTGGC  
TCAT TTTCTATCT TTTGGCTCTAGTTA TTTACAAA TTCTTACCCC TTTGCCAGGCTATTCCGGACGACTC  
CTTCAGCTA CAAA GTTTC CTCATCTACAGTTAAA ACCTTG GAAA ACTGTCTTGCTGGC TTTAAA ACACCT  
TCTATCACTGCTATGCAACAGACCCCTCCTCCAGAACCTCCCAATGAGCTATCCACGAATATCTCCTGTC  
TCAATCATATGATCGCTCGA GAAA TTATGACTCC CAAAGCTGACATC TTTGCTTTA CAAGGAGACACCCC  
GAT TTTCTCAAGCATCCCTCTAATCATAGACGAAGTTATAGCCGATTCTCTGTTCA CAAA GAGTATT  
GATGACATCACAGGAATGGTTCTCG TAAAAGATCTGTCACCTG TTTACTATAAGGATCCTCATACCTCCC  
AACC TTTATCATCGATCGCTATCCTCCCTTGTACACACCA GAAA TACGTAGAGCCTCTCTACTCTTACA  
AGAA TTTCTGT CAAA AACGTTGTACCTAGCGATTGTCGTTAATGAATACGGA TTTA CAGAAGGCCTTGT  
TCTATGGAAGATATCGTCGA GAAA TC TTTGGC GAAA TTGCAGATGAATACGATGACCAAGAAGATGTT  
ACTA CAAAAAATAG GAAATGCCTGGATTGTAGACGGACGCATGAACA TTTCCGATGCCGAAGAGTGT T  
TGGACTCCATATAGAACAT GAAA GTAGTTACGATACTCTTGGTGGCTATGTATTCCA TAAATTAGGTGCC  
GTACCT GAAAAAGGAAT GAAA ATTTACTATGAAGAT TTTGCTATAGATATCTTATCTTGCTCTGACCGTA  
GCGTAGAAAAAAT GAAA ATCACTCCAAGAAGAA GAAA GCCTTTA TCT TAAA TACA ACTACTTCTCAAT GA  
AACACTAG TAAATCACACTCTCTGTAGCTGTTGTCC TAAAATGTATAGCCATAGTAGAAGGGAGATTACG  
AAAAGGTGCTTTTGATCGTGATA TTTCATGCCT TTTCTGTGCAATCTCTAGAATATAGTGCAGCCCTTCTA  
ACTACTTAATCTTAGGAGTCTATCCCAATGAGTAAC TTTCA GAAA GAAGAACAAGGC CAAA CAGGCATC  
CTTCA TTTACAAGG GAAA ACTCGATGGTGTCTCCTCTCCAGCTGTACAA GAAA GTA TTTCTGAATCTCT TTT  
CCAATGGCAT GAAA AACATTATTCTGGACTGCGGAGA TTTAGATTACATATCTAGTGCAGGTATCCGCGT  
GCT TTTACAAA GCTATCACCAGTAGG GAAAAATGCGGG GAAA ATTGCTCTCACTTCTGTCTC TAAA ACA  
GTGGAACAGACTC TTTA TGTACAGGCTTT TTTG TCTTAT TTTAAGGTCTTCGACTCTGTGAATGAAGCTC  
TACAAGC TTTAG CAAA A GAAA ACAGTTAACCTTACCTTCAACTCGTCTCT TTTCAAGTGATGCGTAGTT  
AT CAAA GTTGTGTGGTCCCT GAAA AAATTT TTTGGTGTAAACATAGCCT TTTCTTTG AAGATCCTCTG TAAAG

CATGCGAAAGCAAAATTTTACAGATAAAAGGACTTCCTGGTTACTCGAACTTATATATTAGTTGCTATGC  
GCAGATCTGTTTGTACGTTACTCCTTCAGTTGCTAGGGCTGGTCAAATTTCTACCTGGCGTTTCGAATA  
TTCTTCAGCTAAATTTCTTCCCAGAGGCACATTGCTAAAATTTGACCTGGGAATAGACGGACGCCCTATA  
GACTGGGAGATTCTTCTATAGATCTTTCTCAACCATGTAATACAAATTTATTTAGAAACGCCTTCCGAGG  
ATATTGTGGCTGCAAAAGCTGTGTATGCTCCCGGAGGCTATATCCCTACTTTCGAATTTACTCTCCCTTG  
TGATGTGGAAGCTGGGGACACTTTCCTATTATTCTTGGCTCCTCTCCCAACTTCCCTCAAGAGGACTCT  
TCAGGTAATGGTGCTCAATTAATTACTCAACGCCGTAAACCCTTTCCTCTTTATGTTGACCCATCAGGGA  
AAGGATCTTTTGAAGATCCCAGATCTTCCACAATGGATATCAGAGGAAATGTATTAATAAATATCCGGAT  
TTTTGCTCCTTCTTATGTGATCAAAAACAACCGCTTTGATATTACAGTGCCTTTCGAAGATGAAATTTGGG  
AACTTAACCAATTTCTCCCAGAAAGAGACCCATATCGAGCTTTCGTACGAACATCTTCGCAAAACCTCA  
ATTGGCAATTGTTTATCCCTGAAACAGGCTTTGTGATCCTTCAAACCTGTATTTCAATGAACCAGGTAT  
TTATCGTATTCAACTACGCAATCAAGCAAAGAGAGGCTTTTACATCAGCGCCTATCAAAATGTTTTGCA  
GAAACCTCCTCTCATCTTTGTGGGGGCTTCTACATGGAGAATCTGAACGTGTGACTCTGAAGGTAATA  
TCGAGTCTTGCTTGCCTTATTTTCGTGATGACTGCGCGTAAACCTTTTTGCAACATCCTCTTTCGAAAT  
TCAAGATGGCCTGACCCAGAAACCATTAACCATTAAACCAAAACCGTTGCTGATTTTAATGAAGAAGAT  
CGTTTCATTGCCTTATCCGGAGCACAGTACCTTTCTGAAGAGCCTGGCGAGGGAATTCGTGAAGTATTGC  
TGATGAAGGAACCCTAAATCCCAGGAAACATAAAAGAAATGCAAACTATTTCTTTATCTAAGCTATATAA  
GCAATCAACTAGTCATGAGTTAATCTCAATCCCCAGCTTCACTGCTTCAAAGAAATTTGGATAACAATTTT  
AATAATTTTCATCCTGAAATTTGAAAGAGTTGTTGAAATTTATAATGCCTGGGGATGCTCTGAAAGA  
AAGCTGAAGGGAACCTTTTCCTATTAAGGTTCTATCGACTCAGAAATCCAGAGGGAAGCTGTTCTATC  
TGCTTTAAAGAGAAACCTGCGTTTTGGATTTCGTAGCCGGTGGTCTTGATGATAGAAATCTATAACATCAC  
TTTTTTGATTCCGATCAACAGCAATACTCCCCTGGATTAACAGCTGTGATCTGCAATAAAATATTCTCGGG  
ATTCCTTACTCGAGCATTATACCAACGACAATGCTATGCTACAACCGGCCTAAAGAAATTTATCGTGAAATTT  
CCAGATTACATCTGCTCCTATGGGCTCCGAACTCTCCACAGCCATTAACCAGGGCTCGTGATCAATAGA  
CATAATTTCCGGATATGTAGCAGGAACCTGCCAAGATTGCGTCGATTGAAATCATCCGCAATGGGGATATTC  
TCCATACCTTCCACCAGATGAAATAACTTTGAGTATGAGTACGACGATCTCTCTCCTTTTGCACAAGT  
CACTCTAAAAGATCCTCAAAATGGAGCTCCTTTTGTCTTTACTACTTACGAGTCACTCAAGAGAATGGA  
GCTATGGCTTGGAGCTCTCCTATTTGGATAGATCTTAAATAAGGCCTTCATGACTTCTTTATTTTC  
TACTCGTCTGTTGCGCTACAGCCCTTCTCAGTATAGGAGTAACAGCTGTTTTATAGGGTCTTTCTACT  
AGGAAGACCCCTATCTAAAGGATGTGGCCGAGCGACTGCTGTCAGAAAAGAAGTCTTGTCCCGTGA  
AAGCAAAACTCACAACTGATAACTACTATGACGACTCTTCCAGCTCGAATCCTACCATAAAGCGCATGG  
CTTAAACCTTATTTGATGACTATTTATCTGGAGCGCTCTTTCGAAAACAAGCTTTTACAATTAATTC  
TCGTTGATGCTGAGGATCAACAAGCTTTATGGAGCTTTGCTGATCTTATTTCGTGCCAATCGTGTGGTGA  
CACAGTTTCTACTCGTCGACCCCTTATTTATACCCTACAAACTCTGTGCTGTTTAACTGTACGTTTTGT  
TCTTTCATGCTCAAAACAGGGAACCTACAGGATGGTTCCTTACTCCAGATCAACTCGTACAATCTATAA  
AAGAAAACCTTCTCCATTACAGAAACGCATATTGTAGCAGGATGCTACCCCTCTTGTAACTTTGCTTA  
CTATGAAGAGCTCTCTCAAATTAAGCAAAATTTCCAGATCTACATATTAAGCGCTCTCAGCTATC  
GAGTATGATTATCTGTCAAATTAGACAATCTCCAGTAAAGAAATCATGCAACGCTTGCATCGCTG  
GCCTTGATTCTATTCCTGGTGGGGTGTGAGATCTTAGTCGATGAAGTCCGAGAGACCCTCTCGGAGG  
CAGATTATCTTCCAAGGATTCTTAGAGATCCATGAAACAGCGCATTCCTTAGGAATCCCTAGCAATGCT  
ACCATGCTGTGCTACCATCGAGAGACTCCTGCAGATATAATGACACATATGAGTAAACTGCGCGCTCTTC  
AAGAATAAATCTTGGCTTTAAGAATTTTATCCTCCTCAAATTTGCGTCAGAGAATAATGCTTTAGGAAA  
GCGTCTACAATAATGACTTCAAGACACTCGATTCTCCTGCAACTATTATTGCAGTTGCTCGACTATTC  
CTAGACAACATCCCTAATATTAAGCTCTATGGAATTAATTAAGGTCCTCGACGTTGCTCTACACTTGTAT  
CATGCGGAGCCAATGATTTGTCTTCCACTACCAAGGAGAAAAGGTAATTTGGAATGGCCTCTTCCAAGA  
GCCTATTCGTATGGATATTGAAGGGATGTCCCATCTCATAATACAACATGGTGCATCCCATGCTTAGTC  
AATTCAGACCGTTTAAACATTGGTTGTGTACGCTACGTTAACGCCTTACCTTTCTAGCGGCTTATC  
ACAAGCTCCAGGCTCTCCTTGCTTATGGATACCCCTACCAATCTGGTGCCATAACTCCTGTACAGAA  
ATAGATTATGCGTTAACCTCTGTAGCAGCAACATCTCTTCTTCTTACACAGAGTATCTTCTTTGGGA  
TCGCGGCTTAATAAATAAATCCTAAGCGTAAACTTACATGCTACTTCGCAATTTTTGCTAAGGAAGCTCC  
TCATATAGCGGCTACTAAAGAGAGTCTTCTTCTATTTTGTGCTACGAGTTCTATGCTAAAACCTATGG  
AATATTCCGTTCCCTTCCGTTACCCTACTTTCCTCGGACAGCATCTTACACAAGCTGAACACTATGATG  
CTTTATTATTGATAGGAGATACGGCATTACGCCATCTATAATCCAGGATTCACACTTATGACCTAGC

AGCTTCTTGGTATGACCTGACTGCAAAACCTTTTGTTTTTGCTGGGATTCTCAGCCTTTC TTCAACTATT  
TCATTTTCAGCTTCAACAGGAGTTCTCTTCCACATTGAATTATTTTCAGAATCA TAAAGAAGATATTACCA  
GCAAA GCAGCTGCATTAC TAAA ACTCCCAGAATCGCTTATGCAAGAATACTATACTTTATGTGCTATGA  
GCTTTC TGAAGAGGAT TTTG CAGGGTTAGAACAG TTTA GAGACTATTATGACCGACTTCCACGACAAGC  
AAATATC CAAATCATGTTGATTCTCTTGCGCCTACCTATGATAAA ATCAATGGTATTCTATCATTAGGC  
TTGCATATAGCTTGGAAACAATGC TTTG GTTTC TCTCTTAGGA GAAA CTAACCATCTATTAGATTTA TGTG  
CAGGAACAGGCCGGGTAGCCCTATCTTATGTCCAGA ACTATCCTCGAGCCTCAGCAACTCTTGTGTTGTT  
CTCAA CAAA AATGCTA GAAA ACCTC CAAA AACGCCACCCCTCAGCTCCATTCTCTATATTACGAGTGAC  
GTAACACACTTGGCGCTTCCGGATAATACG TTTG CTTA GCTTCTATGGCCTATGGATTACGGAACTTAT  
CCTATCCATTAGAGGCTCTTAGGGAAGTGTATCGAGTATTACAACCTGGAGGACACTTGGGTATTCTAGA  
ACTAACACGCCAGCAACATATAACCCAG TTTA CCTGCTACACAAGCTCTATC TAAA TCTTGTGTTCCCT  
AGCGTCGGCCGTT TTTA TTTCTGGGAACAGCTATGCTTATTCTGATCT GAAAGAAA GTATCCGGGATCTCC  
CACGCGATGCCGCTCTCGAAGCAATC TTTT CATGCAGCGCATTTA CGCCCTATCCG GAAA CG CAAA C TACT  
T TTTG GCACAGCAACCA TTTG GAT TTTA GAGAAG TAAA ACTAC CAAA CCT TAAA AGCAAGGCTTATGAAC  
GGCTCTTCTTACGTCCAG TTTG TTAGT TTTT TCGG TTTG ATTT C TCTTCTCGTCTGCTACTCCTC  
GTTGAA GAAATCCCAGTCTCTCCATCGCTATCGTAACCAAGCTTAGCGGATAATTC TCG CAAA GAAT CA  
AAACGCTCAGAAA ACTTAGCT TAAA TTCAACTGGTCTTCCAGACGCCCTCCTCCTCGCAAGTGTGCGAGGA  
ATTTCTTCTTCTGTAT CAAAT TTTT CAGAAA AAGTAAGCGAAGAAGGAGATGTTATCTCTGG TAAA AATAG  
AAAACGTCGTGCCG CAGAAGGGACT TTTG TATAGATATCGTTGATATGGTCTGCTCAGCTTCAACC TTT  
GCCGACTGTTT AAGAGTCTGCCCTCTT TTTG GACGAGGG TTTA AA GCCTCGTTGAATAGTATAC TTTAG  
ATTTGTTTAAAAGAAGCTGACGCGCCTGTGTTAACTC TTTT GATACCTTGGCATCGAATAGATGTACCTT  
CAGTTGTTT CAAA ATGTGCTTAGA GAAATCAAGGTCTTCTT CAAA GA CAAA CT GAAA CTGATTATTACGA  
AGCCACTCAATGATGCGAATACGAGAACGCTCAACA TAAA ACTGTTGCCACTTCTCCTGCTCAGTCTCAT  
GGTCATA TAAA AACTCCAGAAA CTGCTCTCGCGCATCTTAGACTGCACTATCTC TAAA AATT TTTCTTT  
AGTATCGATATCG TAAA TTTT TTTT CTTTAC GAAA G TTTT CATGATCTTCTTAA TTTT CTGAGAAGTCAAT  
TTTG GAATCAAGCAATACCGATCCGCAT TTTT TTCCAATTCCTGA TAAA TCTTATCTAGATCTTCTGAT  
CTTTA TCAAGATCTATGTACAAGA TAAA CCTTCTACCCGATC TAAA TAGAAA TCTCTCTCGTCATCAGA  
CTTCGAGAAGGCGTCCATCAGGCGTAGAACGCGTAA TAAA AGAGGAT TTTG AGGTACAGGATATGTCGTC  
ATAGGCTCCAGTATAGGGGATGCTCTGTTAGATAGCAACTCTCTCTTGTGTTATCCTCAAT TTTA TC CAA  
AACGTCCTTGATTTA GGCTCTAACACC CAAA GTTCTCACTACGATTCAATAGGCTCACAGGACCCCTC TAA  
AAATACCTTGCC TTTT CAGAAA AAATCTTAATCAGATTTT TACTACGAGAACACACCGCTATAG GAAA  
TCTTGTCTTAGA GAAA AGATATCCGCTGCAAC CAAA GCACTTGCCAACATCCCTGTCCACAAGATAAG  
TTTCTCGCTCACAACCTCGTCAATAAGTATAGACAAGCAGCAGATCATCCTTCTCCGCTGAA CAAA ATC  
TACATTTT ACACCTTCAGGAG CAAA ATCTTCATGATAACGCAA GAAA GACCCCATCTTGTACGGGAACC  
TTACT TAAA TCAGAAA C GAAA ACCACGACATGCGGAACCCCTGTATCAA TAAA AAATACTTGTCCGGCA  
TACCAGGCAACACATGCGTTAA TTTT CGCTCAGCTTT TTTT CAATCAGGTAATGTCATATCAACCAATAC  
CCGATTCATA GAAA AGA ACTTACCTTGG TAAA ACCACGTTCTG TTTT CAATA GAAA CATCTTCAAGTCA  
AAGCACTGGGCTACGTGCGCCATTGCGCACCGCAACCCATTCCC GCACATAGACGCGATAGATCCATCAC  
TAT TAAA AACAGTGAG TTTA GCATCTGCTATTTT CAGAAGACTCTACACA TAAA AACCCATCAACCATCTC  
TTCTTGGCATA TAAA AACAGAACATCCTCAAGAGAAGGCATCGATTCTCC CAAA AT GAAA CTG TTTT CTGCT  
CCAGAATA TAAA AGATATCTACAAGTCGT TAAA AGAGAAGAGAATCCCATCTAACAGTCA CAAA CTCCATT  
GCTTCA TTTG CACTCATCCACATATCTCGATCGATAGC TTTT CTATCACCTCTGGAGATTGTCCAGTTG  
CCTCGACATACACATCAATAATGCGTGCT TTTG TTTT AAAA TTTT CACGAGCATGAATATCCAAGTCCGT  
GGCTTGACCAGTAATGGTTCCCTCCAATAGAAGGCTGGTGAATCATAATGCGCGCATGAGGCGTAG CAAA  
CGTCTTCTGGAACAGCACACA CAAA CTCAATACAGATCCCATAGATGCTGC TAAA CCTGTAACAACCTGTAG  
T CAAA GGAGAAGAGATCAT TTTA TTTG GTCC CAAA CAG CAAA CCCAGCATCAACAGACCCTCCAGGGCT  
ATTAATGA CAAA TACAATTGGCTGCCAGGATTGGTGAGTTT CAAA TAC CAAA GCTT TTTG ATGGCTTCT  
GCAGCACT TTTT TCCGTTACAGGTTCGGAGA GAAA ATACGACGAGAATCCAACAAC TTTT TATCTATGA  
CATCTTGCAACTTATGCATCA TTTT CCCTTACGGCATAGAGTCTCCAC TAAA CTAGCG TTTT CAGATCG  
A TTTT AGGA TAAA GAGGGAATCTTCC TAA TAAA TCAGCCACACGTTGTCTCGCTTCTGAGCGATCCCTT  
CTGACAGCTCTCCCTCACT TTTA CTAGAACCCTCTCAGCATTGCTTCTCACAGTAATA TTTT GCAATAC  
TTTTCACGATAATATTCGCAACTTCTTCCA TTTT GGCCTGCCCATCCCTAGCGTTGTGAGAGCTGGAGTC  
CCTAATCGAATACCAGAAGTCTTCCACTGCCAGAGGCATCTGAAGGAATAGTATTACGATTTA CTGCGA

TACCTACTGAGGTAAACATATCTTCTGCAATACGTCAGGGACTCCTAGAGAAGTTAGATCAATAATCAA  
CATGTGATTATCTGTCCCGCCAGTGAGTAATCGTAGCCCGTTCCGCTGGAACACTTCAGC CAAA GTCTGT  
GCATTCCTACCAC TTTATGCGCATACTTCCT GAAA TTGATCGTCATAGCTTC TTTCAGAGCAATAGCTT  
TAGCAGCTATAACATGAGGAAGTGGGCCGCCATCATTAGAGGACAAGCCTTGTTCAAGGTA TTTCATA  
TTCTTT TTTAGCTAGAACCAATCCACCTCTTGGCCCTCG CAAA GTCTTATGCGTCGTCGTTGTCACGATA  
TCTGCATAAGGCATAGGAT TTTC TTCTCCTA CAAA CACACCTCCAGCAACCAAGCCTGC GAAA TGAGCCA  
TATCCACCCA TAAA ACAGCGCCACAGTCTTCTGCAA TTTC TTCAAGGTGG CAAA GTTGAATCGTCTAGA  
ATAAGACGAATACCC TGCATCAGAACGGTGGGCTTATGTTTC TTTC GCTATTT TTTC GCTATCTCATCATAA  
T CAAA TAATTCAGTATC TAAA TTCACCTCATAAGGGAGACAATGCATTAAT TTTA GACATGATATTCATGC  
GCACAGTCCCATGTGTCAGATGCCCTCCAGAA TT TAAA GAGGGGCC TAGGCA TTTC TGCTGAGCCATCTC  
AGCT TTTA ATGCTTCGTATTCTGCTCAGGCAGATCATTGATCGT TTTA ATATCCCAACTGTTGAACCGCA  
GGGCTCTGGATCTTCTGTGTAATGATCGACATGATCGCTAA TAAA TTCGCATCGGCTCCAGAATGAGGCT  
GAA CAAA AGCAC TTTC CGCAC CAAA TAATTC TTTC CCGTCTCTGCGCATTCCCATTC AATTGCATCCAC  
ATTCTCGCAACAGGAA TAAA ATCG TT TGAATGGGCTCCCTT CACAATACTTGTCTGTAAG TAAA TTCCCC  
ATAGCAAGTTGCACAGATAGAGAA GAAA AGT TTTC TGAAGCAATCATT TTTAAA CGAGATCGCTGACTCT  
TTA ATTC TTGTACAATGCTCTGTCTATAGATG GAAA AGCGTGTAAACAGATGATCTAATGATGC TAAA TA  
GGCCACTGATGC CAAA TTTC TGCTGACT TTTC TCG GAAA ATTTTC TCAGATATCTATCCAATAACGATGCC  
ATATTTTC CACCTCCACTGAT TAAA CCTTGCAAGACCTTG CAGAGGC ACTCCTTATCCTTACCCACTCTC  
TCTTATCC TTTA TGGGAATCTAATCT TTTC TATG GAAA GTC TAAAC TTTC TAGGA GAAA GAGGA TTTAT T  
TTA ACTATAACTACA GAAA AAGAAA CGATGCTTCCAAGACCATTACCAAGCGCCCATTTTTC CTAGTC  
GCTTACCATAAGGTGC TTTA ATACCATCGCAGCTTCAGTTGATCATATTCTTACAG CAAA AGTCAAGAAG  
CTTCC TACTAG GAAA AAAGCTTCTCTTCTA TTTAAA AAAA ACTCTAACAT GAAACCT TTTA CACAAGAGA  
TCTCCCTCATCGATCATGCCTCTGTACTTAGGCCTCAATCCATCCTCTGC TAAA CAATATTCTGCTGTT T  
TTC AGCCTATTATTTCGATAGTCCCTT TTTCAAAA ACAGTTCCCT CAAA TACGACATGCTAGGAAGTTCCCT  
TGTATCAGCTTCCCATAT TTTC TTAACAAGCCCTCTTCTACCGCTTGT TTTT TTTC TTCCATTAG GAAA  
AGAATCCC TTTA TCCCTGTT CAGGAA TAAATCCTTCGTTACCATAGGAGAAGCCTCTTCTTCTCGTG TAA  
AGGCC TTTC TCCC CAAA GCCAATATTGTG CAAA GCGCATTCCCTCAAGCAGAAGCA TTTC TTCCCATCCT  
ATCGACTCTTCCCTCCAGCTCCTCCCTACTCTATCCTCACTCTGTACTCGCTCGTCCCATTCTCGCTCT  
CTTCTA CAAACACTCCC TTTC TCCCTCCT TTTC CTATCCTCATTACACAGT TAAA CCCATTACACT TTTC CG  
TAAGTACC TTTC TTCCCATAAAA ACTATTATTCTCACTAGCCCTTCTATCGTTCTGTCCTATGCACA ACT  
ATTTCCCTGCCTCCCTGAT TAAA GAACACTGGTGTCTAGGAGAGATTAGTGCAGCAGAATT CAAA CAGATA  
TTTC ACACTCCTCCTC CAAA ATCTTT TTTC AAC TAAA GAACCGACAGGATGTTGATAACAATC TTTC T  
ATTTA TTTA ATGAAGATCTCTTCAAGAAGTTGTGAAGAGATCTTACCTCT TTTA GAGGGCATATAATTC  
CTGTCCC TTTC CAAGCACATGACC GAAA TCCCTCTTCT TTTC TTCTTCCAGATCCTGAATGGATATAT  
CGTGTAGGTATTGGT CAGGACAGTACCCT TTTC TCCCTGACGAAGATCCCAAGCCCTGCATATTAGGTG  
GCATTAAT TTTC GAAA AACTCCAGGATTCGAAGCTAATTCGGATGGAGATGTTGTCTTCCATGCTATATG  
TAATGCGT TTTC GCTGTAAACGCA CAAA GGTAT TTTC GGAGGACTGGCTGACGAGCT TTTC GAAA CAAA  
GGCATTACCGATAGCGTAGTCTATCTACAAGAAGCTGTCGCCTC TTTAAA ACCTACACAACGAGTCTCGC  
ATCTAGCTATTACTATAGAAGGGAAGCGTCC TAAA CTGCTCCCTCAGTTACCGAGTATGCGCAAGAGAAT  
AGCCGAGGTTCTTACATTCCTCTAGATTCATTAACTTACAGCCACTTCTGGAGAAGGCTTAACTGCC  
ATGGGACAAGGATATGGTGTTCATGCT TTTC CGT TTTA ACTATATGGAATATGTCGGTATTAGTATA  
CGTCT GAAA ACTAGTCTCTTCTGTGCAATCAGCTCTCGTACCGCTTAGGACCTAATATCTGCTC TAAA GC  
ACG TTTA ACTTCCGTACCAAGGATTTT TTTC CCA CAAACAAAAA GAAAGCTTCTTGTTCGTAGACTTCT  
TGTATAAGTTCTT TTTC TTGCTCTATAACATTCTGAACATACAA TTTAGACTCGGAATCTCTG GAAA AGG  
CTGTGAATAACTGGAGT TTTC CT GAAA CGATCAGCTCCTGGAGAAA ATCCCGGTAATAGAAGTTACTTTT  
CT CAAA ACGCTCTC CAAA GAATAGAATATTGGAGCCTACGTCTGATGGTATATTCGATGTTGTAAGAAC  
CCTTTG TACGGAGCGATACCTGTCCC TGCCTCCGATCATAAT TAAA GG TTTC CAAA ATTTTC TGCTCA  
AAG TAAA ATGCCGCGTCGGTTGTA TAAA CCCAC GAAA AGACTCTCCCTCTTGTAAGTCTTACA TAAAA  
AGCCGAACATAATCCATAGCGCAGCTGCGT TTTA CCTTG GAAA CTAACACAGCGCACGAGCAACTCTAGC  
TTCCCATGAGAACATGTTGGAGAAGAAGCTATAGAA TAAA ATCGAGGCAATAAA GGCATCGCACTCCGAA  
TAAA CTCTT CAAA AGGAATACGCGGCTGG TAAA CAAA ATAGCTTCAGC TAAA GACCAGGTATCGTCTAA  
ATCCCC TGG GAAA AAAGGTCTTAAACGAT TTTC GGAAT TTTA TCTAAGTCTACGTAAC TAGTAAGAAA TTTCG  
TGAAGAGGGAGAACAGAATCTGCATGCCGAGATACGACAGGAGACCTGGGGCCATACTG TAAA GCATCCA

GAACTGAATCGACTAATGTGGAAGGATTTGTTGGGAATACCCC CAAA GAATCCCAAC TTTA TAG GAAAT  
CTCAGAACGAACCGGATTACA TAAA ATCT GAAA AACAGGATCCGAACAAGTATCCCAATATCCGATGTG  
GAAGAA CAAAGCTCACGTGAATG TAAA AACATCCACTGAGC TTTG AA TTTAGAAA TAAAGACAT TTTA  
AAT CAAA AGAATTAGGCAGCCTTGATCTTAATATCTACTCCAGCAGG CAAA GACAACAT TTTCAA GCAT  
CAATCGTC TTTCTGTAGGATC TAAA ATATCAATTAATCG TTTG TGAGTACGAA TTTCAA CTGCTCAG  
AGATTT TTTATCTACGTGAGGAGATCGCAACACCGTATACACTTCTCTC TTTG TTGG TAAA GGAATTGGA  
CCAACAACACGAGCTCCAGTTCT TTTAGCAGTCTCAACAATA TTTG CTGTAGACTGATCGAGTTGCCCTT  
GGT CAAA ACCTTTCAAGCGAATCCGAATTC TTTG TT TTTGCTGCTTCATATATTCCTTACTTCTTAACAA  
TCTCTTCTTGAAT TTTCTGAGGAAC TTTAG CAAA GAATGCAGGTCCATAGTCGACGTAGCTCGACCAGA  
AGTTAATGATCGCAATGAGGTTCATATATC CAAA CA TTTGCT CAAA GGAACTTCTGCGCTGACCTGCGCC  
ATG TTTCTGGAAGATTCCTGACC TAAA ATCTTACCTCTACGACGATTC AAGTCTCCAATCACATCTCAA  
GATGATCTTCTGGAGTAATAACCGTTAC TTTCAATAAGGCTCTAAGATCACAGGAAGAGCT TTTCTACA  
AGCTTCT TTTACAGCCATCGATCCG CAAATCT TAAA GGCCATCTCACTAGAGTCTACCTCGTGATAGGAT  
CCGAACACAATGCTTACCTTGACATCGACTAATCCATATCCAGCCAGCACTCCGGAA TTTA ATCCCTCTT  
CGACCCCTTTAATTACAGCTGGGATGTACTCT TTTA GGAATTACCCCTCCGACGATCTTACTGACAACCTC  
G TTTCTTTTCCAGGTTCA TTTG GCTCAAT TTTCAAG CAAA CGTGAGCATATTGTCTCGACCACCAGAC  
TGCTTAACGTAT TTTG TTTCACTGTTACTTGT TTTG TGATCGTCTC TTTG TAA GAAA CCTGTGGCTTAC  
CAACGTTAGCTTCAACTCTGAACTCTCGGATCATACGATCACGGAGAATATCTAGGTGCAATTCACCCAT  
TCCA GAAA TAATCGTCTGTCTG TTTCTTCATTAGTAGAAA CTCG GAAA GTTGGATCTTCCTCAGAGAGA  
GCACT CAAAGCCTGAGCTAACTTCTCTATCCCC TTTAGACTTAGGCTCAATGGCCATATCAATCACAG  
GTTCTGGAGCTTCAATACGTTCTAGCACAATCTCTGGTTCTCATCG CAAA GAGTATCCCCTGTTACTGA  
GAAT TTTAGCCCTACACACGCACCAATGTCTCCGACG TAAA CTCGTCCCTATCGGTTGCTCGTTAGCA  
TGCA TTTCCAGAAGTCTTGAGATTCGCTC TTTCTTATC TTTGGTCGAGTTAAGAATGGCAGAACCCTTCT  
TCAA GTTCCAGAG TAAA ATACGGA TAAA AGTAATACGTCCAACATAAGGGTCGGTCATGAT TTTGAATGC  
TAAA GCAGC CAAA GGACCGTCT TTTGAAGGCTTCAAGGAGACTTCTTCTCCAGT TTTCAA TTAATCCCA  
CGAACATTCCCACGATCAAGAGGAGAAGGCAACCCTTCAACAATAACATCAAGAAGCTGTTGAACACC TT  
TATTT TTTGAAA GCACTTCCG CAAA GAACCTGGATTGAT TTTA CCTCAATCACTCC TTTACGCATTACAGT  
ATGGA TTTCTTCTTCTGTGATAGAATCTGGATTCTCCAGCAC TTTCTCCA TAAA GGCTTCGTTGC TTTCA  
TCAACGGTAGCTAGTTCTTCTAATAATTGCATTCTCAGTGTGCGCACTGCTCTTG CAAATCTTCAGGAA  
TCTTGCGCTCTTCCCA TTTAGCTCCTAGAGTCTCTTCAAG GAAA TACAGAGCTT TTTGAGAGAT CAAATC  
TACCATTCCCA CAAA TTGGCTCTCAGAACCGATTGGACAATGAACAGGAATAGCGTTAGCTCCCAGCT TT  
TCTCTCATGGACTCGACAGCGC CAAA GTAATTCGCGCCCATACGGTCCAT TTTATTTACAAA AGCAATCC  
GAGGCACTCCATACTTATTCGCCTGTCTC CAAA CAG TTTCCGATTGAGGCTCGACTCCAGAAA CAGCATC  
GAAA ACGGCAACAGCACCATCGAGAACTCGCAATGAACGCTCTACTTCAATAG TAAA GTCAACGTGCCCA  
GGAGTATCAATAATATTAATC TTTG CACCCAGCCA GAAA ACGGTCGTAGCAGCAGAGGTAATGGTAATTC  
CTC TTTCTTGCTCCTGTTCCATCCAGTCCATGGTTGCTCCACCTCGTGGACCTCACCGATCTTATGAGT  
TCTTCCCGCGTA GAAA AGAATGCGCTCTGTTGTTGTTGT TTTA CCTGCATCGATATGCGCCATGATACCG  
ATA TTTCTAATCGCGTC TAAA CCGAACTCTTGATCGTCTCATCGAATTT TTTG CCTCTCACACAGAA TG  
TTAAA CGTTATCTTACCCTTATAATGAG CAAA TGC TTTATTTGCTTCAGCCATGCGATGGGTGTCCTCG  
CG TTTCTTAATCGTAGCCCTTG TTTA TTGAAGCAATCGATCAACTCATTAGCAAGACCGACTTCCATAC  
A TTTCCCTGGCTTAGAACGAGCATGCTTGATAATCCATTGCATAGCAAGACAGCTTCTTCTATCAGGAGC  
CACTTCAACAGGAAC TTGGTAAGTAGCACCACCAACTCTGCGAGAACGCACTTCAAGAATAGGCTTCGCA  
TTCTC CAAAGCTTCTTCGAATCCTTC TAAAGGATCTCTAAGCCTAATCT TTTAG CAAA ACGCTC TAAAG  
CACCG TAAACAATC TTTCTAGCGATGCTCTTCTTCCCGTGAACATTAC TTTG TTA TAAA TC TTTCTAA  
GACTACGCTCCCG TAAA CAGGATCGCCTGGAATGACCTTCTTCTCAGCCGCATGTCGTCTTGACATA TAA  
ACTCAACCTCTTCGAT TTTCT TTTCTTTAGG TTTA GGAACCAGCCTACTTAGGACGC TTTG CGCCGTAG  
CGAGAACGGCTCTGT TTTCTATTT TTTACGGCAGCACAATC TAAA GCACCTCGGACGATGTGATAACGCA  
CCCCGG CAAA TCCTTAACTCTTCCGCCTTGAC CAAA ACGATGCTGTGCTCCTG CAAA TTATGACCTTC  
TCCACCGATGTAGGCAATCACCTCTTGTCCATTAGA CAAA CGAACCCAAGCAACCTTACG CAAA GCTGAG  
TTAGG TTTCTTCGGAGT TTTAGTT TTTA CCTGAAGACAGACCCCTCT TTTCTGAGGAGACT TTTGTAAA G  
CTGGAGAT TTTCTTTCTAGTTGCGCCAGACTGACGCTTCTTACGTATTA ACTGATTAATCGTCGGCATGTA  
CTCTTCTCGATTCAACCTCTCTTA CAAA CAG GAAA ATATAGAATAAGAATATC TTTGTTTG CAAAGGGTT  
A TTTCTAGGTCTAGTAAGAG TTTA TCGATCTCTATAACAAT TTTA T TAAAAACA TTTCTCTC TAAA AGAT

TTTC T TAAAACAAGCCTTCCCTAAA AATAATTA TAAAAAAGAGT TAAATCCTTGCTGATAAA ATGTT  
TC TTGAATACTGTTAGTT CAAA AACTT GAAAAACAAGACTTGTATCAT GAAA GTTGTGTGAATCCTACT  
CAAGAATATTCA CAAATTTTCAACTCCGGTATTGCCG CAAAATCAACGTGTTACGTTT TTTGAAA TACCG  
CAATGCTAACCTGCAGCCT TTTG TTCACGCTGTGTTCCGGCAGTCTG TTTA TTATTGGTCTT TTTCTCA  
AACCCTATTCTT TTTGCTGGAGCATT TTTGTCATCGGGATG TTTCTAGCCT TTTCTAGCACTCTGCATC  
TTTC TTATGGCTCTTATCTATAATGTGAAGAACTGGCTATCTCACAGACCTATTCCCTCTTCCACTAT TTT  
CCAATA TAAAT TTTCTTGTCA CAAA AAAAAATAACCCTCCGTTACC TTTCTTTCTGAGAAA AAAAAGT  
TTTT TTTCTAGAGCGAGTAGG TAAA CAACCAAGTACTTGGGTT TTTA TACAACAAA TACCGACTCAAG TTT  
GCGAAA CTCTGTGCAAGATACGAATAATCACGATTAATAGAGATATTCTGTAATGATGAGATTCTGCTCGC  
TTTTG TCTGCTAGT TTTA ACCCTA TTTCTCACAACCTTGCCT TTTCTAGCAGAGCCTCTTCGACGACAAGATG  
TCCG CAAA ACCGTAGATAAA ACTAGTCGAACATCATATTGATACGCAACAGATCTCTCCTTACATTCTCTC  
TCGATC TTTGGAAGATTATGTTCTGTTCT TTTGATTCTCA CAAA GCGTACCTTACTCAAGACGAGGTCTTC  
TCCCACGCTTTTCTAGAAGAAGCAACACATCCCCCTA TTTAAGCAATATCAAGAAGATAACT TTTCTTCTT  
TCAAGGAATTAGATACCTGTATCCAA CAAAGTAT TTTCTCGAGCCAGAGAATGGCGCTCATCTGGCTCAC  
TGATTCCATACGAGTAATTCAAGATGCCATGTCTCATACTATTGA GAAA AAAACCAAGCGCTTGGGCTTCT  
TCAATTGAAGAAG TAAAG CAAA GACAATACGATCTTCTTTCTTTCTACGCATCTATCTA TTTA GAAGATG  
CAG CAAA AAATCGTTATCAAGG GAAA GAACATGG TTTAGT TAAA CTCTGTATCCGCCAGATT GAAA ACCA  
T GAAA ATCCTTATATCGGCATTAACGATCATGGATACAGAATGTCTCCGGAGGAAGAGGCCAATAGCTTC  
CATGTTCTGATTAT CAAA TCTATTGCTCATAGCCTAGATGCGCATACCGCTTAC TTTAGTCAGGAAGAAG  
CTCTATCCATGAGAGCTCAGCTGGA GAAA GGCATGTGTGGCATAGGAGTCGTGCT TAAA GAAGATATTGA  
TGGGGTTGTGGT TAAA GAAGTCTTGTCTGGAGGCCCTGCTGATAAAA ACGGGTAGCCTTCGTGTAGGTGAT  
ATTAT TTTACCGTGTAAA TGGGAAA AATATTGAAA ACACCCCTTTCTCCTGGGGT TTTA GATTCTCTAAGAG  
GTTCTCCAGGATCCTCCGTTACT TTTA GATATCCACAGA CAAA AATAATGATCACGTCAATTAGTTACGTCTG  
TGAAA AAATTCTCTTAGATAGTCGTCTGTCTGACGTGTCTTACGAGCCGTACGGTAATGGCATTATCGGT  
AAGATCACCTTGCCTCT TTTCTATGAAGGAGAAA ACCAAGTATCGAGCGAACAAGATCTACGTAAA GCCA  
TTCTGAGAATTACAAGAAA AAAACCTGCTTGGCTTAGTTCTTTGATATTCGAGAGAATACGGGAGGATT TTT  
ATCTCAAGCCAT CAAA GTGTCTGGGTTATT TTTA ACGAATGGGGTTGTGGTTGCTCTCCCGCTATGCAGAT  
GGTTCGG TAAA ACCTACCGCACTA TTTCTCCT CAAA AATTTTA TGATGGGCCGCTAGCTGTT TTTG TTT  
CTAAA AGTTCGGCTTCGGCAGCAGAAA ATTGTTGCA CAAA CACTCCAGGATTACGGAGTAGCCCTGATCGT  
GGGAGATCAACAAA CTTATG GAAA AGGAACCATCCAACATCAGACTATCACTGGAAGCAACAGTCAAGAA  
GAT TTTCTTTAAA GTGACAGTGGGGAGATATTACTCTCTTCGG GAAA ATCCACACAACCTCGAAGGAGTGA  
AATCAGACATTGTTATCCCTCACGTTATGCAGAAGA TAAACTCGGAGAACGCTT TTTAGAGTATGCTCT  
ACCAGCTGATCAATACGACAATGTGATCAATGACAACCTGGGAGACCTAGATATCAACATCCGCTCCTTGG  
TTTCAA AATACTATTCTCCACAT TTTACAAA ACCAGAACCTGG TTTG GAGA GAAA TGCTTCTCAGCTTG  
CTCACAATAGCCAAGAACGTCTT GAAAAAAA CAAA AAC TTTGAGATT TTTGTCCAACACTT GAAA AAAAC  
AAACAAA CAGGATCGATCG TTTGGAAGCAACGATCTG CAAATGGAA GAAAGTGTGAACATCGTTAAGGAT  
ATGATCCTTC TAAA ATCTATATCA CAAA CTCCAGCTCAATAAAA ATCTGGGAGGAGGACTCTTTCTCCTC  
CT TTTCTATACATCATCTGTCTCAGCAGATCATCCA TAAA AACTGCCGCTATCATCT TTTG CCTATAGAGCA  
ATCTCTTATCATTTGGTCTGATCCACCAGACTA TTTCTTCTAGATAGAGATACCACTACCCCATCTATGG  
CATTCAACCTCTCATCAG TAAA CACTTTATTAGAGTTG TTTA TCTGCCATCATCGATGATATCTTCTGA  
AGCC TTTA ATATCTTCTTACATAAGCTCCATCTCTCCGGAGAACAGTATCCTTCCATGGATAAA ATTCCT  
ACGCAGATATTCACGCATCCCAATAGCAGGAATAGCTAGATAGATGGGAT TTTACAAA CGAAGCTGCCG  
AAA CTAGGAATATCGTAGCCATCAC TAAA AGTAGTCCATCACCACTAATCCCACCT TAAA TGCAGTGGAA  
AGATAGAAGATTTCGATATACGCC TTTCTAGTGTAAATGGTGCAGAACTAGTG GAAA ATCCTGTGCCGAA  
TTGGAAGATCCAGCTCCTTGAACAACGGGTACAGTGTCTCATAT TTTA CATTCTTT TTTGGTTGTGAGCA  
GGGAGTCTACA CAAA CACTTATTT TTTCAA AAACCCATCTAGAATATGCTCTGAGAAC GAAA ATGAACT  
CT TTTAT TTTCTATATAGATAA CAAA AAAAGCCGCCAGGAATCCCTGGACGGCACCTACACATCGATAAA  
AT CAAA GATTAATAGATGTGTGTATTCTCTGTATCA GAAA ACTGGAACAGTCAATGTATCGGAA GAAA GAA  
TCGCTTCCCCACGAGCATCTCCAGCTGATACTGC TTTCAATGTTACA GAAA ACTCTACAG TTTCTTTAGA  
ACCTAATCTAGGTAACGAATCGAATACTACTGTATTCGCTGTAATCGTTCC TTTA GTTGGTCCAGAGAAG  
GATACAGGTTGCAGTTCT TTTAGAGAA TTTAAGCAT TAAAGAAA CA TTTGTATCTTCTGCAGAACCCTCTGT  
TGGTGACA CAAA TACGG TAAA CAGTAT TTTCTCCTACA CAAA CAGGGTCCACAAGTATCTACTACGCACAT  
ATGAGTAGCAGCAACTCC TTTCTCAGTAAGTTGTCTGCTTCTGCGCAAGAAGTACAAGTACCACAGTCAGAG



CAGCTCTTCACAACAACATTA**TTTG**TGAATTGTCCAGGAG**TTTG**TGCTCTTACTAGAAC**TTTA**TACTGTA  
GAGACTCTCCAGGATTCAGTTC**TTTC**ACAGTC**CAAA**CTACT**TTTA**TTACAAGAAAT**TTG**AGCTCTGCAGC  
TTCAAGAACTGTGACTCCGGG**GAAA**GAGTGTCT**TTTA**ACGACGACATCTCGCAACACAAGATCTCCAGGA  
TTG**GAAA**CGGAGATCACATATTCTACAGGCTTA**CAAA**CATAAGACCAATCTGCTCCTGCAATACTTACTT  
GTACGCAAGGCTCGTTGATCACAGTTGTTACGCTTGCTGTATT**TTTA**TGTCCTCCACAGTAA**GAAA**CCAT  
TGCTATATTGGTAGCACGACCACG**TTTA**AGCGGA**CAAA**ACTCTACAGTAATTGTTCTGTGCTCTCCAGGT  
TGCATATCTCCAAGAG**TAAA**CGTCAGTACACGCTGTCCAGAAGAATGAGCGTAACTATCCGGAACAGGAT  
**TTTC**CAACAACAACGTTACGAGCTGTTGCTGTTCTTGGTTCACTACATTAAT**TTTG**TAAACTACTGGGCA  
ACG**CAAA**CAAGCATCTCTGGGCCCTTCTTG**TTTA**ACACAGATAGCAGGTTGTCCACAT**TTTG**TAACCGAA  
CGGATCTCTGGACAAGCGCATACTGTTGCAGCTG**TAAA**GCAGCAACCTTCT**TTTA**AGAGGTT**TTTA**CCATA  
CAGTAAT**TTTA**CTCT**TTTC**GCCTTGTCTTAAGCGGTCAAT**TTTCCAAA**CTAGCTTACCATCAGCAGTAGG  
AGTTGTGCTGGATCACTGCGTACGAACCTGCTTCACATGGTAATTGCTGAGTAATGATAACATCAACA  
CAATCCCT**TTTA**CCTGTAGCAGTAA**TTTC**CAACAGGATAGGGAGATCCTACCGTAGCATA**TTTA**GGAACAG  
CTTGTGTGAT**TTTC**CAACATTACGATCATCATTAAC**TTTG**ACTGTATACATTCTGC**CAAA**GCAAGAATCCTG  
**TTTA**GGTCTCTGTAGC**TTTAG**ACTCATGAACCGGAGCAACCTT**TTTAC**CGG**TTTA**CGGGAGTCTC**TTTG**CTG  
TGGT**TTTCT**TTGCT**TTT**GGCT**TTTA**TGAGAAGTGTGTCT**TTTC**GC**TTTGG**TGTCAGCTAAGCTAATAA  
CG**TTTG**TAGAGAT**TAAA**CTCTGCCATAGAGGTCTCTAACACCCCGCTAG**CAAA**T**TAAA**CTCGCCACACTAGT  
CACCGCAAGATCGTCACTGCTCGTCTGATGAG**TTTG**TTCATAGGATCTCCTATTGCATAGATTAT**TTT**  
**TTG**TCTGCCATCGGGT**GAAA**TTGTTATTAATACT**TTTA**CCCTCAACAT**TTTC**TTGTTAGCC**GAAA**TA  
GTTAGTAAGGAAGCCAACCTTCTTACTAATACTACATCTGTTGTGGGTAGGCTCTTAAC**TTG**CGCTACCTAT  
TGCTGCA**TTTG**CCGTCAACTGGAA**TTTC**TCTAGCTTGAGGGCCATGTT**TTT**CAGCATCTTGGTGCATCTCC  
CTCCGCAAGG**TTTG**CAAGCTGGGACATACCCGTTACAAGAGTTGCAACCACCGTCTACGTC**TTTC**TTCTT  
AGATTCAAGGTGAACATTGGATAGGTGCGCATGGATCTT**TTT**CGAAGCAACAGTCAACGATACGACAACA  
CTACT**TAAA**G**AAA**CAACACTACAT**TAAA**GCAGCGAG**TAAA**GCAGT**TTT****TTTC**CATAACT**TTT**CAGACTCC**TTT**  
**CTAGAAA**AGGGCTCTTGAAG**TTTC**TTTTATCGAT**TAAA**AGCAATTCT**TTTA**ATAA**TAAA**G**AAA**CTAGCCC  
TCATAGACAATATTACATTATA**AAAA**T**AAAA**ATTATATCAATTGTT**TTT****TAAA**A**CAAA**TCGTCTAATAACA  
GGTAATTAG**CAAA**T**CAAG****CAAA**C**AAAA**T**AAAA**ATA**TAAA**CAGCTCGGATT**CAAA**GAGATAAG**TTTG**CCCT  
**ACAA**C**AAAA**C**CAAA**CTTCGATAGAA**TAA**ATA**AACT****TAAA**ACT**TAAA**ATCTATCT**TAAA**CTATAGATA**CAAA**C  
AGACTA**ACT**ATATA**ACA**AGAATCGGAGGGAT**GAAA**AAAT**GAAA**AGATT**TTTC**CTT**TTTA**TTGTAGCTA  
CTGCTGCCCTCCTGACACAAGGGTGTCTCTATGAACCC**GAAA**AGGGAGTACATCTTAGCCAGAGTG  
CTCCCTCT**TTTC****CAAA**CACGCCGAACCTTAGAT**TTTC**TCTCTAGCTCAAGCAGTA**TTTG**AAATGACCTTC  
**TTTA**C**CAAA**GCACCACCTGTGTATCAAGTCTTGAAGAATTGTCT**CAAA**ATTAGAAGTCT**TAAA**AACTAA  
TGTCTTCAAGAGGCTGATCCTGCAATGC**TTTG**TCGACTTGCTGCTGCAC**TTTC**TTGGATACTCCTCCAA  
TAGAT**TTTG**GAGCATAGGT**TTT**CAGCCGTGCTCGCGTCTAGCCTTACCTAGTAATCCATCGAAT**CAAA**AAGA  
GGAAGTCCCTGT**TTTG**CACCAGTAATAGCCACATATAGCAGAGGGATTACAGCCTTCTTATGATGCACTT  
**GAAA**AGCCTCTGCTA**CAAA**T**TTTA**GATCCTTGATAGAA**GAAA**ATCT**TTTC**TCCATAGATCCTTCTCTC**TAA**  
ATACTTCACTAGGCTATA**CAAA**CATGACTGCAGCCTGCTCTT**TTT**TAAGCGAGGATGGTAATAACTCCTCT**T**  
**TTA**CTATATTGAGGAATCGCAGT**GAAA**AAGAAGCTGGTTA**CAAA**CAAC**GAAA**T**CGG**CTAACGTAGTAATAC  
GTGATTGACAGAGAGGAAGAA**TTTCA**A**TAAA**AACTCGTCATTCCAGAGCCACCC**TTCA**ATTCTTGTAA  
GAGACTCTCTGGAGATCCTT**TTT**CGTGGTTAAGATAGTG**TTTG**TTCATCCAGTCTAAC**TTAC**GGATATC**GAAA**  
ACGGCTCCGGATCTTCCAATT**CGTT**AGGAT**CAAA**CGCTTCTAT**CAAA**CGCTGCATGGAA**TAAA**TCCTT  
CATCCCTTCCATACTATA**CAAA**CTTAGGGT**CAAG**AA**TTT**CA**TGA**ACGCTTCTT**TTTG**TATCCAGCATC  
CCGATAG**TAAA**AAATAGAA**TTT**AGGAT**TTTC**TCTTG**GAAA**GCTTACTTCCATCAGGAT**TTTA**GAAGAAGC  
GGCATATG**GAAA**AACTGCGGAGGCTCC**CAAA**AGCT**TTTG**T**AAA**GAAGAAGGTG**TTTAG**GGTGTAGAAC  
TTA**CAAA**CTCTTCCCTCGCAACACATGGGTAATCC**CAAA**CTGATCATCAACTACATTAG**CAAA**GTG  
ATACGTAGGGAACCGTCTGAT**TTTA**AC**CAAA**ACTTGATCGTCAACATCTGCC**CAAA**AGG**GAAA**ACGACACGA  
CC**TTTG**CATTGATCTT**CAAA**AA**CAAA**CTTCTCCCGT**CAAA**AGGCAC**TTTC****CAAA**CGAATGGTATAAGGCTGTC  
CTTGCTCTTCTC**TTTG**TCGA**ACT**TCTCTGGAGATAGGTAACGATACCGGCGATCGTATCCTCCTCTGTA  
CCCAGAGTACTGGCAACCGCCCGCA**TTTC**CTGCAATCTT**TTT**GAGGAGTAG**CAAA**AACTTGTACGCACAA  
TCTG**TTTG**TAAAGAGGATCTCTGCGTAT**TTT**T**TTT**G**TAAA**TCTCTGTGCGTTCGGACTGCCGATAAGGGCCAT  
AAGCTCCTCCAACATCTGGACCTT**TTT**CGTCC**CAAA**CGAAT**TTT**CGCACC**ACT**TGAGGGCGGA**GAAA**ATA**TTTG**C  
TTCATAATCGTCCCGACTCCGAG**TTTG**ATCCGTATCTT**CAAA**ATCT**TTTG**CCCATTATAT**TTT**  
**CTTG****CAAA**AACTCAT**TAAA**AGAGCCATATAAGCAGTCC**CAAA**CTAGGATCTCCTGTAGGAGAAGGGG

CTACTCTAACGCGTACATTTTGGACAGTCATTTCGCTACTAACCAGGAAAGGAAACTTTTC TTC TTTATG  
AAA TGAACACCCCGTCCC GGTTTCTGTCTATGAATCAGGCA TAAAATCGGACCGTT CAAA GCCCTACG  
TTCC TAAACGATACCAGAGAGATTCTTCTGGCGACTTTTAA CAAAAC TAAAAATAACGAGTT TTTCCGGAG  
CTCTTTTTCAA CAAA AAAAAGAGCCCCCTCCGGAATTCGGAGGAGGCCCAAGCTCTCCCCTGCTGTGCC  
CTTACAGAGAAGGCTCTATCTCTATGAGATAAAAT TTTCTGCGTCTGCCAG CAAATCTGCGCC CAAAGCC  
T CAAAACCTTCTCTCATGGCTGCAAGACT TTTCCCTTTGCGCTCAGCTTCCTTCTTCAGATAATCG TTTCC  
GATATCTGTCTACTTCC GAAACGTGAATGACCCAAGCAGATCCCCGACGCTCTCC TTTCCATAGCACCAAT  
GCGTGTAGCATAG TAAATCTTCTGTTCAGGAACATCCAGCATGGACGCCACTTGTCCCACGGAA TAAAAG  
CC TTTCTCGTTAT CAAA CAGAAGCTCTCCTTGATAAGTGGATTTA GCTCGTGAATAACGATTACGTCTGT  
AATCCTCTAGATCTTG CAAATCTA TTTCCCAACGAGTAGTCTTCGATGCTTTTAA TTTCTTCTGT TTTAAT  
AGCAACATAGATAGCCTGACGAGTCACATTATGCAACTTGGCAGCCTGAGTAATCGATACTCT TTTGCGAA  
GTAACAGGAACAGCATTCTCTTCTTGCTGCTGAACTTGAAC TTTGCTGCTTCGACCCCTGTATCTTGT  
GTAAGCATTCCATACGACTGTTA GTCCTCTCTCGTCCACT TAAAAA CAAATCTTGGCCTGTCTTGTGAA  
TAATGGCTCTGTGACCTTCTAACCCCGTCTCTTAGAGCTATGCTTATTGAATCTCTAAGTCGGACAAGCC  
CTTTCCACTCTATT CATAACTTTCTCTTCCCTAG TTTAGCGAGCGCTTACTGAAAAATTG CAAAATCCTTA  
AAAAGAGAAGGTAATAT TTTCCCAA CAAAAA CTTATTAATCAAGTGG TTTGT TAAAA TAAATGCTATT  
TTTGAAACAAAGT TTTGTAAAGTTT TTTACAATAGGAGAGAT TTTGTCCTCTCCTCTACTCTGAGATGAC  
TAGAGAGGATAATACAGACTTCT TAAA AACC CAATC GAAACCAC TAAACAAA TTCGGGGTTAAGGA TTTAC  
AACCGAGGAATCTGTATAC GAAAATCCTGAATCAA CAAACGAATTGCTCCGCGAGCCGACCGCCTCATAA  
TACGTAACGTATAGGCGATATC CAAAGGTATATTC AATTCGCTTTGAGTAGACTAATCTTATCCCCCTG  
ACC GAAAGCCGTCCCCTCCAAG TTTCTCTCCCCTACTATT CAAATACAA TTTGACATGGTTCCCGGCTAAT  
AAT TTTGATAACGTACCTGTATGGCT TTTGTATAGAAGACTGGGGATACATTCCCT TTTCCAAAAGGCT  
CAAGAAGCTCCATAGAAGCAAT TAAATCCCGATTGATGCGAGAGAAA TCCATCCCAACATCTAAG GAAAG  
CGTACGCATTGCATCATCT TTTCTCAAAGAAGAACTCACTAGATGAA TAAATTT TTTCTGAATCCCTCG  
ACCTGATCTTCT TTTGATCATAAGCCCGGAGC GAAATCATGCCCGCCATACGATA GAAAAAAGGATTTCGC  
ATTTACGAAGA ACTCTAATAAAGG GAAAGATCCTATAGTACG TAAAGATCCC TTTCTATCCCATCTTG  
GAGAGCAATAAATTGCTACTGGCTTGTATAGGTACGCG TAAACGAGCAGAAA TAATGGGGATTACTCTA  
GAGTGCCAATTAGGAGAAGCTAATAACAATAGCTGATTGAGCTGTAAGCTTAGGATTTCGAGCTAGAATCC  
TTTCCACATCGCGCAGTACCTCGGCTTCTATTTCGCTGACGCTCTTGA TTTACAGCA GAAAGCTCTGAGAC  
GATCGTTCCAATATT TTTAGGATCTTGAGACAAAAGTAAC TTTACACCCTGACTTGAATCTGCCAACCTC  
CCTAAA CTATTGAGT TTTGGAGTAATTC TAATTCCCTAGATTGGTCGACGATACTCAGACTTATCAACC  
CTGATAATGAACACAGCTTT TTTAAGCCTAATCGT TTTCTCTTTGCTA TTTCTTTAATTCCATAAGAAAC  
TAAGATACGATTCTCTCCT GAAAGCCTCCCTACATCTGCAATCGTCCC CAAACTTAC CAAATCTAAAAAA  
CG CAAAAGGTCTAT TTTGCTTTTCAAGAAGCATCCTGTGGATCAATCTTCATAGGTTGCGCATAACCA  
ATTTAAA CGCGACTCCTACTCCTGTAAGCTCT TTTATTTGGATAAGGATT TTTATCTAA TTTAGGATTTAG  
CATTGCAATGCAATGCGGAAGCTTCCCTGTAGGCATATGGTGATCCGTAACGATCACGTCTATACCCTGT  
TTA TTTGATAGCCTGAACCTCT TTTCCCTGCTGTGATACCGCAATCCACAGTAAT TAAAAGAGAAA TACCAT  
CCTGCAGCATTTTGAGAAAT TAAA GAAGCTGTCTCTCCATGTTG TTTAAA CAATGTCCC GGAACAGCAATA  
ACTTGT TTTCACTCCAAGTATTTGTAGAAAT TCAACGATCAAGGTCACGCCTGTTATACCGTCTACATCC  
CCATCTCCATAGATCATCACGTGCTCATTATTTGCTTTAGCTTTGAGTAACCGTGCTACAGC TTTCTCCA  
TATCTAAGAACAAA GAGGTGGAGTGAATGAGGAGAGCTGGGGATACAGAAAATCTCGAATCTCTTGAT  
AGACT GAAATCCCCGAGATATGAGCACTTGAGCAATCGCAGGATGAAGAT GAAACTCTTTAAGATCTTC  
TTTAGAAA GACCTCATTATGCTTAGGGTAATCCCAT TTTGTCCAAGGGAGGATAAACTACCTTTTCCA  
TATACCTACCGGAG GAAACTCCTGT TAAAAAAAAGCTCCCTCCTTC TTTAGGAGGAAAGGAGCCCCATA  
ATCATCCCACAAT TTTAGGATCACATACGCCAAGCGTATTTCCATCA TTTACCGTAGAGAAT TTTGTTCT  
TCCTTACGCACCATGAATAAGAGAAGCGGAGGAGCTATGTACAATGAAGATAGCGTTCCCTAACAGATCC  
CCACTGTCTAATGAATG CAAAAT TAAAATAGAACC TCCCCAACGAATAA CAAAATGACCAGTACAGA  
TAGAGTTGTTGCCGTAGTCATAACTGTACGTCTAATGTCTTCTGCAATGCATCATTGAT CAAAATCGGC  
ATTGGGGTGAACAGTT TTTCCGCGGATCTTCTCGAATACGAT CAAAATAATCAACGATTGTT CAAAG  
AGTACCCTAGCACTGTCATCAATGCGCCTATTGCTTG CAAATCAATCTGTATTCTCTG CAAAAA GAAATG  
TAAGGCAACTAGCACAGCACAAGTCGCTAATAAGTCGTGCAT TAAAGCA CAAA TCGCACTGAAGGCATAT  
CTCCACT CAAAGCGCAAGCTAACA TAAAGTAAGATAATTCC TAAAGCTC CAAA TAATGCGATGACAGCCT  
GTGTACGCATTTTA TTG GAAAGCTGTCCACTTACCT TAAACCAGCTACCTCGAGAAGCAT CAAA TACCAT

AGAAGTAGTAGAACTTCCGGAATCAGACAATACTTGAAGAACTCGAGCAAGATGATAATCCGATCCTTTC  
TGTTCTGATCCAGCTCCTTCTA TTTGCTCAACTCTATCCAAGGCATTCTGAGATAAAATATATTTTGACTT  
TTC CAGAACTATCTGCTCTACGCACACGATAATCTCGAGAAGATAATCCGATTTGTTGGAAACGC TTTCT  
CAATACAGAACACATCTGCTCTGGATTGTACTCACACACATCGGAATC TAAAGTCAGTGCATATCCACCT  
TTAAAATCCATCC CAAA AACGGAATCCCAAGCAC CAAA CCCTAATCCTACACAACC TAAAACAAGA ACTA  
CTCCAGAAA ACTACCCA CAAACG TTTA CATTCT TTTA AGAAGTTATGCTTGATCCCA TAAACTTATTCAT  
CATATGCAATTGGGTCTCTCTCGT TTTCTGCACC CAAATGA CAAAGAAAAA TTTCTGCATAAA CAGGGCT  
GTGAACATGGATGAGAAAATCCCGATGAT CAAAGTGAGCGC GAAACC TTTGATAGGTCCTGTATCTAACA  
TCAGCAGCAATGCTGAAGC TAAAATAGTAGT TAAA TTAGAGT CAAA AATGGCACTGAATGCCTT TTTATA  
ACCTGCTTCTACAGACTCCGACAAGCTTCTAGT CAAA AGATATTCCTCTCGGATTC TTTCAAAGACTAGA  
ACATTAGCATCAACAGCCATTCCCATTGCTAGGATAATACCAGCTAACCCGGATAGAGTAAGTGGAGCAT  
C CAAA TATTGCATGGAAGCC CAAA TGAGCAATAGATTCAGCAGCACC GCTATAGAAGCAATAACACCTC  
AAA TCTGTAGTACACACTCATTAGTACGATGAGCACTACAAGTCCCAACACAACAGAGAGAATTCCTTGT  
ACACGCTGAGA ACTTCCCAACTCAGGAGAGACC ACTTCTTCACT TAAA ATTTCTGGGATGAAGGACATAG  
CTCCAGATTTAAGATCTGTAGC TAAA CGATGTACTTCTCTGTATGAGAAGTTTC CAGAAA CACTAGCATG  
ATC TTTCA GTGGAACATTC AACACGGGATCGCTGATCACGTAGCCATCTAATACGACAGCCATACGCCAC  
CCTCTCCCTCCAGAGAAAAGGCCATTT TTTGTACC ACTAACCCCTTCTTGG CAAAAC TTTGATGTCCAAG  
CAT GAAA TTGTTGCACAGGCG TTTCTCTACCGTCC GAAAAAGTGGC TTTATCCTTAACCC CAAA TTTAA  
AACATATCCCTCTCCTACTG CAAA TTCTGGACGGATATT TTTA AGAGAAGCTCCTTCTAAGGCATGATTT  
CTAAA TACAATCATGAGAGGATTAACCTGCTCTCTAGACTCTT TTTCAATAGCAATCATTGAATACTGTG  
TATC TAAA GAAGCAGAACC GCTTCTAGCTC TTTAGAAA AACTCAATCCAGCTTCTCTTAACTTCTCGAC  
TGCTACACGAACATTAGCTGGAGCTGAGCCATTATCCCATG GAAA AGAGCTCCCGC TAAACGATTGATA  
GCTTGAGGAGAACATTCGTC CAGACTACGTGCTG TAAAC CAAA GGTAATC TAAA AACGTTTG TACTTCGT  
AACGTAGAGGGCTTCTTGAG GAAA ATTGCTCATTCACTACATG GAAA GACATTTTG GAAGTCCC TAAAAT  
GTCTGCAGAAGAAA TACCTGCTGCTCCAGGAACGCTCACCTGTATATGATCACCTTCCC TTTGCATCCCT  
ACTTCGGATACCCCTAG TTTGTT CAAA CGGGCATATAACTCATCA GAAACTTTA TCAATCCCCGC TTTAT  
CGGTTAATAAGTTCCCTTGGTGATCTCG GAAAGCAATCCGAATCTG TTTCCCTCCTACAAAATCCGTGCC  
AAA CCG CAAAACATGCTCGCCTCGAGAATAT TTTCTGATATTCAA TTTCAAATCT CAAAGAAA ACATTC  
TTATGTGGAATTGCAGCTCGTAACCGAACCTGTGGATT CATAGAACATTGCGCTTGTGATACTGCTCAT  
CCCAACGA ACTAGCTCGGCATGCTGAGTCTTCTCAATACGATTTA CTACAGCTAACCGGTCACGCACATC  
ACGGACTTCAAGAGATGCCTTCC CAAAAC TTTGAA CAAACTCTTCTCCC CAAA TTCGAATGACACGTTGC  
AAA GGCTC TTTA ATCTCTAGAACACGATCCTCTCC CAAACTCCAC GAAACTGCATCCGTATGAA TAAAAC  
ATGCATA TAAAT TTTG TAGATCATGTTG TAAAAGAGCAGCTTCTCAGCACCGGCATGTTCTACTTCCG  
TACAATCGAACGTAGACC TTTAAA TACAATGTAAA CAGAACC TTTAGAAAAATGCCGACAGCTTCGCTCC  
GGCGA GAAAATAAA GCATCCTAAGGCATCGTATC CAAA GGCTCCCTACCATAACAGG GAAA TTTCTG  
TGGATAAA TCACAAG TTTCCGCAAGAGGACGATTCAAGACTAGTGCAGT CAAA GTTCCACTATTCGCTG  
A CAAA CTCTGTGCCCTTG CAAAACAAT TTTA CCGCTAGCCGCTCATCTCTAATCGGACAG CAAA AC CA  
AATTCGGTCTCTTCAACAGAACGATTC AAGCGAGTAGCTATGTGCTG TTTCTCCATAG CAAA CAGACGCT  
C TAAA TC TAAA CGCTCATTACCAACTA ACTGTTGACGATTAGCAGCTACTTCCGCGTC GAAA TGGAATAA  
CAACTTCCCATCGGCAGTCAAGGACATTGAG GAAA AACAAGGAGAGAGTTC ACTACAATCAACAACATTC  
CCTACGAC TTTA GGGCTAATCGAATTC CAACGTAAA TTACGAGAATG TAAAAGATAAGAAGCATCTTTAA  
GCTCCTCTCGAGCTTCCCTCACTTCCCTCATGTTG TAAAGCTTT TTTCAACCTTGC CAAA AAGGCTGTAAA  
ATCGCGCTCCGTCCCAAGCACCGAGATAGAAA AACTTGAGTCTTCTTGTAGGGAGCAATCGCAAGCCA  
GAA CAAA TGTTCCGTGTGACATGGATAACCT TTTCAATAGGCATAGAATCCCA TAAA GAATAGTATCCGC  
ACTCACAAGGGCGTCTGACTCGA TAAAATAAG TTTG TTGCGAGAT TTTCTAATCTTGC GAAA CCGTAAC  
ATC TTTA TCTTCATACGAGA CAAA GAAA GATCTTCTCTGT CAAA GAAGTCAC TAAA CTTCGG GAAATT  
TGAAACA CTGTCTCTCCAGTGA ACTCAGAGCTCCCTACAACATACAATCGTGCAGACTTGACAGGAACAG  
AAGGCTCGCCGTGCACTACATTATCAA TAAA TAGTGCAGCGTCTTCTGC TAAA GAAA ATGTACATTCAC  
AACTCCAGGAATACTTGGATGCTGC TTTATATCCCCGCGTAAT TTTAACGTGGA TAAA ATTTTC GCAACA  
CGCAGCGT CAAA TCATTCGGTGCATCC GAAA CTGTGCGGT GAAA CGCTCTATAATCTTGCAGCCCTCTC  
GTCCATCTATT TTTCTATT CAAA GGTCGTGAATAGTATAGACATGTAGGTAACACATGATA CAAA GC CAA  
AG CAAA AACAAGAATAATAATGCTGAGA TTTCTGCT TAAA ATTACGCTTCAATTATGAGGCTCTTTCGTTATT  
CGTGAATTCTGCGAATGCAGCTACTTAGCCCAACGCTCAAGCAACGGGAAGGATCTAGGCTCTT CAA

AACATATATGTTGACAAAAGAAAGCCCTCTCAATGACAAGAGAAGGAGCCCGGAGTCTCCCCATTTT  
GACGTCAGAGACAAATTTGGATTGGAATCTTTCTGCAATTTTTGGACAACACGGTAGCTTTCATGC  
TTGTCTACAAAACCAACCGAAAACCTCTCGCCCGGCGACTCGACCAGGAAAGCGTTCCTGGACCACCC  
CTTTGTTACGTCAAAAATAATTGTAGCTCAGTATGTTTTTGTAACGTTTATAATCAAGGGTAATCACGAG  
TAACTGAAGACTTCTAAAAAATCAACAGCAAACTGTTTCTCAAACTGCTTACTGAATAGGCGCTTCAG  
AAGAAGCTTCAAAAAGAAAGAGCCATACGAACACGCATATTAGCTATCTGGTGATACGCCAAATAAAGCAA  
CAATGAGCCCAAAATTACTAAGCCTAGTCTGGTAAACTGTAAACACGTACAAGAAAGCAAGAACGCTA  
CAGCCCAAAACAGAAATCCCTAGCAAAACGATCAATGAAGGCACTATTCGTTGCACCAATTCATTGACT  
GTACACGATCCAAGGAAGTGAAGTCTTTTCTTGACTTAGACGTTTGTGAAGATGCCCAAAAGCTGT  
AGGCAAACTAAACTCACTTCTGGTAAATTTTCATGTCTTATTTCTTGCTCATCACCGCAAAAAAGCCGC  
TATTTCTGTCTAACTAACCAATCTATCATGCCGAATAATCCGGACTTACTTGAAAGCTTCAAAAGCAAA  
ATAGAGATCTAAGGTAATTTGCTCTTAATGAATAACAAGAGCGTTCGTCCATTTTACCAAACTAAGCTGCT  
AAACCGCAACCATCAAAACAAAACCTTCAAATAAATAAATTTTATTTTGCTGATGCTTAAATAGATTT  
TAGAAGAAGTGGTTTCTACATTAGAGGAGACTTGATAATAATCATTATCTATGGGTACCATCCCTGCTC  
TGAGTTCTAAGAACCCTCTACCAGAGTCGCCACCTTCTCTACTAGCGATATGGGGATGGTTTCTTAGAA  
AAAGGGGGATATGGATCCCTATAATTTCTCAGAGAACAGCAAACTCCAGCCACTATAGAATATCAGACT  
GCGTATGTCTCTAGCTTTTAGAACAGGCGACCCCTAATTCAGAAAATCTTCCGCAAGGGAATTCCTCCCT  
AGACATATCGCCATCATCATGGATGGGAATCGTCGTTGGCAAAAGAAACATGAACAATTTTGTCAAAAC  
GTGCTATATCTGGCCACCGTCAGGGAGCTGATAGCATTCCACAAAATGTTGACACGGCTTTTACACCTAGG  
GGTAGAGGCTCTTACGCTAATTTGCTTTCTCTACAGAAAATTTCTCTAGATCGAAATCGGAGTCGAGAA  
TTATTTTCTTTATTTCAACTCGCAGTTGCGCAGCAAGCTCTCTTTCTTACATGATCGGGAGATCCGATTAC  
GGTGATTTGGCGACTTATCGAAACTTCTCAAGAATTAACAAAACAACATTGAGCAAGCCTCTCCGCGAC  
AGCTCATTACTCCCGCATGGAGTTAATTTTGGCATTAATTACGGAAGTAAAGACGAACCTGTTGCGCA  
TTCAAAAGAAATTACATCAGGATCTTGCAAGTAAAAAAATCTCGGTCAACGACATTTCTGAAGAGCTTATCA  
GCTCCTACTTAGACACTTCTGGCCTTCTGACCCAGATTTTGTCTTATTCGTACGGGAGGTGAAATGCGTGT  
CAGTAATTTTCTCTTATGGCAAAATAGCCTATACAGAACTTTATGTAACAGACGTGTTATGGCCTGATTTT  
ACAGCCAATGACTTGTAGAAAGCGATTAAAACATACCAACAACGATCACGGCGCGGAGGTAAATAAACGC  
TATGTTGATTCGGATCATAATTCATTTTTCAAAAGCGATTTGTGTCAGCGTCTGGTCTGCTCCACTCGATT  
CTTCTTACTTTCTTGTCTATTCTTCTCTGTACATCTTTATATCCAGCTCAGCCTTTATTGTAGGGCTTC  
TTTCTCTCCGCTTGGCAGCTCTAGGAACATATGAGATGGGGGCTATGGTTAGAATCAAGTTTCTCATTTTCT  
TTTCTACACGCTATAGTGCATTAGGATCCGCTATTTTCTATTGCTCTGACCTGCTTACAGCTCGTTGTAA  
ATGTATTTTCTCAGAGCATATAGACCTACTTCTTGGTTCCTTCTTTTGTGACGATTCTGCTTAGTAT  
TTAAAGTTCGCCATTAATAAAGTGGTCCCATAGGCTCAACTGGGCTCGCGTGTGTTTGTATGCTTTATGT  
ATCACTCCCTATCCGCTTGTTCCTCCACATTTTGTATGGGTTTGTGCATACCGATACTCCATTTGTAGGA  
ATTTGTGGGCGATTTTTCTTATCGCTACAACAAAAGCTCTGATATTTTGGTACTTCTTTGGAAAAG  
CTTTTGGGAAAAACGCATTGCACCAGTCAATAGCCCGAACAAAACAGTAGTAGGCTTCATTGCTGGTTG  
CTGTGGATCTATCTTGGTTAGCCTTCTTTTCTACTCCATCTTCTTAAAGCCTTTGCTGATCAGATTGCG  
GTGCTCGGATCCTCGTTGCTTTTAGTACTGTGTTGGGCGTTAGTGGATTCTTTGGAGACATTATCGAAT  
CTACGTTCAAAACGGGATGCACAGATTAAGAACAGCAGTATCTGGAGTCTATCGGAGGAATGCTAGATGT  
GCTAGACTCCTTGCTTCTTTCTGACTCCTATCGTTTACGCTATCCTCCTTATCACTCAAAATAGGACATTT  
TTAGGATGATCATCACTATAGATGGGCCGTCAGGAACAGGAAAAGTACGCTAGCAAAAGCTTTGCTCA  
AACGCTGCAGTTTCTTTACTGCAACACAGGTGCCATGTATCGAACGCTTGCCCTACGCTCGCCTCCAGCCT  
GATTGGCAAGAAGTCCATTAGAAGATTTTCTTGCTTACCTCCTTTTCTTTCTCCTTTTCTAAAAGATT  
CTCCTTTACAAGCTTTCTATGGAGATCGCCTTCTCACTTCCGAGTTAAGCTCTCAAGAAGTAGCGAATTT  
TGATCGCTCTTCTTAAGGAGCCTCTAGTTCGAGCCTACATGCAAACTTACAAGCAATACGCGACA  
GTAGGGAATTGTGTAATTTGAAGCCGCGATATGGGCTCGAAAAGTGTTCCTCCCATGCTGAAGTAAAATCT  
TCTTAACAGCTAAACAGAGATTCGTGCAGAACGACGCCTAAAGACCTCCCTCAAGGTTCTTGGCTAA  
AGAGGCTTTAATGGCAGAACTCATGCTCGTGACCAAGCAGATCAAAGAGAGTGGGATCCTCTTGTG  
ATCCCTCAAGATGCCATAGTTATTGACTCTTCTGATTTGACAATAAGCAAAATTCGGAAGAAATCCTAC  
CTTTGATACCCTCCCATTTAACATGATTTTTACTATCGCAAAAGCCTTGTTCGCTTACTGTTCCCTCTG  
TTTTACAGAAGAAAATCCTGAGGTCGAAAGCAAGCGCTACCGTGAAGGAGCCGCTATTATTGCAGCGA  
ATCATGTTTCTTTCTTGACCCCATCATAATCCCPTTAGCTTTCCAGGAAAATGATCAGCTAGCTAA  
GTCCGGACTGTTTCTTAATTCATTCACTAACAGGCTTTTCCGTGAATTAGGATGCTACCAATTAGCAGA

AACGCTGAAAA TGCTGCGGCC TTTAAA GCTGCTC TAAA TATCT TTTT CCATGGAGGGAGGCTCATCATTT  
ACCCCGAAGGAACCCGTCATGCCGACGGAGAAA TTCATCAAGG CAAA GTAGGCGTGGGTATGCTGGCTAT  
CAAA GGCAATGTCCCTGTTATTCCCG TTTACGTGGCAGGAAC TTTT GAAGCCTTCGGCAAGAAC CAAAA  
TTTC CTAAGCTTTG GAGAAC TTTG ACTACTGTAATAGGCTCGCCTA TTTT ATTCCAAGACCTCATAGATA  
ACCTGCTATTGA TAAA AAAGAGGCTTACCAATTAGCAACTGACCGCATTATGACCAAGATCACCGAACT  
TCGTACTTGGTTCCAACAAGGATGCATTGGA GAAA TCCCCTAGT TTTA TAGATTC TTATGACAACACTTC  
TTTC TTTT TGACTTCGCTATGTTCTGCAGCGATT CATCAAGCCTTCCCCTGAGTTGGAAGAGCTAACCTT  
AGACATCACTCCCTCTACTAAGGAGCAT TTTG GACATTATCAATGTAACGATGCAAT GAAA CTTGCACGT  
GTATTACG CAAA TCCCCTCGTGCCATTGCCGAATCGATCGTTGCGCATATTCCCTCCGCTCCTT TTTT CT  
CTATAGAGATTGCAGGAGCTGGAT TTTA TCAAT TTTT TTTT CAAA AGAATTCCTAGCTAGTCAGTCCA  
AA CTTTCT CAAA AGAATTAG CAAA TGGG TTTT GTGCTGCGTCTCCT CAAA AAGTTATTATTGATT TTTT CT  
TCTCCTAATATTGC TAAA GATATGCATGTAGGCCATCTGCGCTCCACGATTATCGGAGATTG TTTA GAC  
GATGCT TTTT CTTT TCGGCCATGACGTCTTACGCT TAAA ACCATATTGGAGATTGGGGTACAGCT TTTT GG  
TATGCTAATCACCTATCTGCAAGAGACCTCTCAGGAGGCGATT CATCAACTAGAAGATCTCACTGCATTA  
TA TAAA AAAGCTCACGCGCG TTTT GCAGAAGACTCTGAAT TTTA AAACGCTCCCAACATAACGTTGTAG  
CCTTACAATCCGGAGATGCTCAAGCTCTTGCACTATG GAAACAAA TCTGTTCCG TTTT TGAGAAA TCCTT  
TCAGACAATCTACTCGAT TTTT GATGTTGAGCTCCATACACGCGGCAATCAT TTTA TAAATCC TTTT CTA  
GCAGAGGTTGTGCGAGACTTAGAATC TAAA AACCTTGTACGCT TTTT TGATGGCG CAAA ATGCGTATTCC  
ATGAAGCCTTCTCTATTCCCTCTCATGATT CAAA AGAGTGATGGCGGATACAATTACGCAACAACCGATGT  
CGCAGCTATGCGCTATCGCATCCAACAAGATCAGGCCGATAGAATTC TTATCGTTACAGACTCAGGACAA  
TCCTTACACTTCCAGCTTCTAGAAGCAACGTGCTTAGCAGCAGGCTATCTTCCCTT TAAA GGGATCT TTT  
CACATGTAGGATTCGGACTTGTCTTGATACTCAAGGAA GAAA ATT CAAA ACACGTTCCGGAGAGAACAT  
CAAA TTACGAGAACTTCTCGATACAGCAGTG GAAA AAGC GAAA GAGTCTCT TAAA AGCACATCGTCCAGAC  
ATCTCAGAAGAAGAACTGGCATATCAAGGCCCTATCCTTGGTATTAATGCAAT TAAA TATGCAGACC TTT  
CTTCTCATAGAATCAATGACTACGTGTTCTCT TTTT GAGAAGATGCTCCGCTTCGAAG GAAA TACAGCGAT  
GTCTCTCCTGTATGCCATGTACGTATCCAAGGAAT TAAA CGCAGAATGGGATTAGAATCTCTGCCTCAA  
GAAGGCCTCTTGCTATT CATGAGCCTGCAGAAGAAGCGTTAGCACTTACTCT TTTT ACGTTTTC CCT GAAA  
TTTTG GACCTCACCTCAGAGAACTCTGTCTCA TTTT CTAACTGACTATCTCTATGCACTCACCAATAA  
GTTCAATAC TTTT TCCGCGATTGCCATATCGAAGGATCCGATTCTCAGCAAGAACGTC TTTA TCTCTGC  
GGACTTACGAACGAACGCTATCAACAGGTATGCACTTACTAGGTCT TAAA ACCTTGAATCACCTGTAAC  
ATATGAATA TTTA AGGGAAGCTCTTCGAGTCTTCCCT TAAA CATAACAGATACTGCGTCTCGCG TAAA  
ACCTTAGCTCCTAATC TTTT TAA TTTT CCTCGCCAATCAGTGTACCCTCGATCCAGCATCTCGGTATTCT  
CAATCCATGAGGCTCCGCCTTCTGCAATGAGTGCGGCCATGACATAAG CAAA TCCTGCGCG CAAA TCAGG  
AATCACTAAGTCTGTTGCCCTG CAAA GGAGTCGGACCATGAATGACTGCGCTATGAGGATGATTCCCTGTA  
GAATAGCGACACGACTTAGCACT CAAA CACTCGT GAAATAAA TCACAATGCGCTCCCATTTT TAC CAAA C  
CTTT CAAA TACCCAAGACGATTCTCATGCACTGTCTCATGGATCACCGAACAACCTTCTGACTGAGAGAG  
CAATACGG CAAA AGGTTGTTGCCAATCTGTAAT TAAA CCCTGGATGCACATCCG TTTT TAGAAGAACCCC  
CC TTT CAAA AGGCTTATCGTAGAAA AATT CGATCCCATCTCATGTACAGAGAATCCCCCTCCTATCGATC  
TTAATACC TTTAAA AAAGGGATCATATGCTCATGGCGCGCTTGTCTACGAAGATCCTTCCCCTGAGAAA  
TACCGCAGCCATAACC GAAA GAAGCAGCCTCGAT TTTA TCTGGAATAATGAAGTGCTCAACAGAATAGAAA  
TCCTGACATC CAAA AATTTT C GATGGTCTTATCATATCTGTTGTAATCTCCACGCCTGC TTTT TG TAAA  
AGACAAT CAAA TCAATGAT TTTT CACTTCAAGAGCAGCATTCTTAATAATCGTTGTCCTTGAGCCCCTAC  
AGAAGCAAGGATGAGGT TTTT TGTGGCTCCCACAGAAGGGTAGGGTAACGTGATGTGTGCTCCAACAAGA  
CCAT TTTG GAGCTGAAGCCCAATAGCCTTTCATCACTAATTACTATCTCTGCTCCAAGCTTCTTCAATCCTT  
CTAAA TG AAA TGTAGCGTACGAGGTCCTATAGCATCCCCTCC CAAA ATAGGAA CAAA AATCCCATAAGG  
ACAACGACGTAACAACGCTCCTAACAG CAAA ATAGGAATCCGATTAACACAA GAAA ATTGCGGAGGAACC  
TTGGACAA TAAA ATGCGCGGAGTGTAAT TTT C AATCACTTGCCTTGCTGATCCACTCTACAATCGCCC  
CTAAA ACCCGACAAA GATCTACCG TTTG CCGAACATCTTCAATATTAGGGACGTTCT TTTAAA ATCGTTG  
CTGATCC GAAA GTAAGGAGGCTACAAGTAAT TTTA GTTGTAGCATT TTTTAGCTCCTGACACGCGCACAGAT  
CCTCTTAAGACCG TTTT CT CAAA AACCTTGATACCAGGCAT TTT CAGTTCCTTCTATTGCAT TTTT TTCACA  
AACGTTACCCGGTATGCTGTTATT TTTT CACGAAAAC TTTT ATTTT TCTAAAAAAAACATCTTATTAA CAAA  
GAGACA TTTG TTTG TT TTTTAAAAA CAAACAAAAA TAAACTTTG TAG CAAA TAA TAAA AACAACCTTTTA  
AAATCTAAT TAAA TCGGCTGTTGTT TTTT ATTTAA TTTG TAGTTATGACGAATCTATATCAGGTGATCAA

CCTACTGTTACAACCTTTTACATCATCAACCACTTCGGCATCAGGTGCTTCCGGATCTCTGGGAGCTTCTT  
CTGTATCTACTACCGCAAACGCTACAGTTACA CAAACAG CAAACGCAA CAAATTCAGCGGCTACATCTTC  
TATC CAAACGACTGGAGAGACTGTAG TAAACTATACGAATTCAGCCTCCGCCCCACTGTAAGTGTATCG  
ACCTCCTCTTCTCCACACAAGCCACAGCCACTTCGAA TAAACTTCCCAAGCCGTTGCTG GAAA AATCA  
CTTCTCCAGATACTTCA GAAAGCTCA GAAACTAGCTCTACCTCATCAAGCGATCATATCCCTAGCGATTA  
CGAGCCGATAAGCACTACT GAAAATA TTTATGAGAATA TTTATGAGAGTATTGATGACTCTAGCACAAGT  
GGCCCA GAAAATACGAGTGGTGGTGCAGCAGCACTCAATTCTCTAAGAGGCTCCTCCTACAGCAATTATG  
ACGATGCTGCTGCTGATTACGAGCCGATAAGCACTACT GAAAATA TTTATGAGAGTATTGATGACTCTAG  
CACAAGTGACCCA GAAAATACGAGTGGTGGTGCAGCAGCACTCAATTCTCTAAGAGGCTCCTCCTACAGC  
AATTATGACGATGCTGCTGCTGATTACGAGCCGATAAGCACTACT GAAAATA TTTATGAGAATA TTTATG  
AGAGTATTGATGACTCTAGCACAAGTGGCCCA GAAAATACGAGTGGTGGTGCAGCAGCACTCAATTCTCT  
AAGAGGCTCCTCCTACAGCAATTATGACGATGCTGCTGCTGATTACGAGCCGATAAGCACTACT GAAAAT  
A TTTATGAGAGTATTGATGACTCTAGCACAAGTGACCCA GAAAATACGAGTGGTGGTGCAGCAGCAGCAC  
TCAATTCTCTAAGAGGCTCCTCCTACAGCAATTATGACGATGCTGCTGCTGATTACGAGCCGATAAGCAC  
TACT GAAAATA TTTATGAGAGTATTGATGACTCTAGCACAAGTGACCCA GAAAATACGAGTGGTGGTGC  
GCAGCACTCAATTCTCTAAGAGGCTCCTCCTACAGCAATTATGACGATGCTGCTGCTGATTACGAGCCGA  
TAAGCACTACT GAAAATA TTTATGAGAATA TTTATGAGAGTATTGATGGCTCTAGCACAAGTGACCCAGA  
AAATACGAGTGGTGGTGCAGCAGCAGCACTCAATTCTCTAAGAGGCTCCTCCTACACAACAGGGCCTCGT  
AACGAGGGTGTATTTCGGCCCTGGACCGGAAGGACTACCAGACATGTCTCTTCTTCATACGATCCTACA  
ATAAAACCTCGTTATTGACT TTTCTCTCCAACCCCTCATG TAAAGTCA GAAAATGCTT GAAAACCTCGGGCA  
TTTCTGCTTTCATTGATACAGATAGAAGTAG TTTCTATTCTTGTTCCTAACG GAAAATGGGACCAAGTCTGT  
TCAAT TAAAGTT CAAAATG GAAAAGAC CAAA GAAGATCTCGACAT CAAAGACTTG GAAAACATGTGTCAA  
AATTCTGTACAGGG TTTAACAAA TCTCTGGTGACTGGGACAGTCTGTAGAACCTATGATGTCAGCCAA  
AGCTGGAGTGGCCAGCGGAGGCAATCTTCCCAATACAGTGATTATCAATAA TAAAT CAAAACCTTGC GTT  
GCTTATGGTCTTGAATAGCCGGAAGCAAGTTCTGGTTATACACCTTCTGCTTGGAGACGTGGTCATC  
AAG TAAAT TTTGAG GAAAATTTTGA GAAAGCCAACGAC TTTAAT TAAATCAACTGGGAACTCAAGCCGG  
GCCTAGTAGCGAAGACGATGGCAT TTTCTTCTCCAAT GAAACTCCTGGAGCTGGTCTGCAGCTGCTCCA  
TCACCAACGCCATCCTCTATTCTGTCAATGTCAATGTCAACGTTGGCGGAAC TAATGTGAATATTA  
GAGATACGAATGTCAACACGACTAACACCACACCAACAAC TCAATCTACAGACGCCTCTACAGATAAAG  
CGATATCGATAACA TAAATACCAACAAC CAAACTGATGATATCAATACGACAGACAAA GACTCTGACGGA  
GCTGGTGGAGTCAATGGCGATATATCC GAAACAGAATCCTCTTCTGGAGATGATT CAGGAAGTGTCTCTT  
CCTCAGAATCAGACAAGAATGCCTCTGTGCG GAAATGACGGACCTGCTAT GAAAGATATCCT TTTCTGCCGT  
GCG TAAACACCTAGACGCTCG TTTA CCGTGGCGACAATGGTGGTTCTACAGAAGGACCTCTCCAAGCTAAC  
CAAACTCTTGGAGATATCGTCCAGGATATG GAAACAACAGGGACATCCCAA GAAACCGTTGTATCCCAT  
GGAAAGGAAGCACTTCTTCAACGGGATCAGCAGGAGGAAGTGGTAGCGTAA CAAACTACTGCCTTCACC  
ACCTCCAACCCATCAACTACAACATTAAGAACGGGCACAGGAGCTACCACCACATCCTTGATGATGGGA  
GGACCAAT CAAAGCTGACATAATAACAAC TGGTGGCGGAGGACGAATTCCTGGAGGAGGAACGTTA GAAA  
AGCTGCTCCCTCGTATACGTGCGCACTTAGACATATCC TTTGATGGGCAAGGCGATCTCGTAAGTACTGA  
AGAGCCTCAGCTTGGCTCGATTG TAAACAAA TCCG CAAAGAAA CTGGTTCAGGAGGAATCGTAGCTTCC  
GTTGAGAGTGCTCCAGGCAAGCCGGGATCTGCACAGGTCTAACAGGTACAGGGGGAGATAAA GGC AACC  
TATTC AAGCAGCTGCCGAGTCAACCAAGCCTTAG GAAATGTTGCAGG GAAAGTCAACCTTGC GATACA  
AGGC CAAA AACTATCATCCCTAGTCAATGACGACGGGAAGGGGCTGTGTTGGAAGAGAT TTTATTC AAGCA  
GCAACC CAAA AACTCAAGCGCTAAGCTCACTGATTGATACCGTAGGA TAAA AAGCAAAGGAGAACAGAC  
GAGCAGAACAGATAAGTTCTGCTCGTGAATGCCTAAGCCATATTGTGG TAAACATCGTCTACATCGTCA  
TGT TTTCTAACCATTCAAT TAAAGCGAGATTCGACTTCCCTGTCTCCTCATCAATCGACAAGGCGCAA  
CGGAACA TAAATTAACCTCTCTT CAGAGCAGGTCAC TCCCTTAGCTAA TAAAGCTTCCCTTAACAGAAGCT  
AAATCTGTAGGTTACAGAGA ACTAAGAAGAATCTTTCATCGTGC TATCAAATCCTCTCCACAGT  
CAATCACATGTGTTAACAAGGAAGCTTCGTCTATGGAATG TTTAGGCACATAACATGCCCC TTTACGAGA  
AA AATTATATAGAACGCTACCGGGCTCCAC TAAAGCCCCACCTCG TTTGTTAACGGCTACGCGCATATCC  
GAGGCTGTGCGGTTCTTATTGTGCGGTCATTGCTTCAACAATGATCCCAACTCCTCCGAACCCATATAATT  
CATAAGTGACTTCTTCATAATTCTTCTGATCTGCAGAAGAAGCT TTTCTTTAGATTACGTTCAATATTCTC  
ATTAGGAATATTCTGGTCTTGGCT TTTCTGAATGATCATACG TAAACGAGCATTCCGAT TTTCTGGATCCGGC  
CCCCCAT TTTA ACTGCAGAGATCAACTCCTTAATCGTTGCAG GAAA AAATCTTCCC TTTCTTGTGATCTG

CTCGTTCTTTTCGGTGTTTAGTATTGGCCACTTACTGTGTCTGCCATGCTTTC TTACCTATCGTACAT  
CTACTATCAGGAAA CCCCTGACAAA TTATTTTACCCTCTGTCCGCAAA CACACTCTATGTCTGAAACAG  
GATCCC CAAAAAGGGCGGAATTT TTTAAAAACAAAGTCTCAATAACCCAACCATCTTACA CAAAAGCA  
AGTTTCAGCTCTATGGAAACCTAGAGGACTCTCTCCATCGTAATTT TTTGCTAAA TACCCCAACTCATCC  
TTATAGAAA GTCTTCTGTCTTCTACTTCCA CAAATC CAAATC TTTCATATAGGTGAATAGCAGGATTCC  
CTTCATACACTTC TAAATACACAAGTTCTAAC TTTAACTGTGTCTTTCTAGATGCAGTAAGTTATTCAG  
AAGAGCCGTGCCAACGCC TTTGTTGC GAAACT TTTCTCCTACAATGATCGACAACAAGCTATGATGTGCG  
ACCTTGACATAAGGATTGAGTATCAACGTAGCTACTCCAGCAACTTCGCCATTGTATACCGCCGT TAAAC  
TACTGCGGCAGCGA TAAAAACTAACCCA GAAATTCACACTATCACGAA TTTCCGTTCTGTT TTTAAAGG  
AAA TCCTCGAAGAATTT TTTGGATCATCAAC CAAA GACGCATATAGTGTGCATCTTCAGGAACCGTATAC  
CGAATCTCTAATAATGGATCACGCATAGTGGTCATGTAA TTTCTCCATAATCAACCAGGTAGGC TTTGAT  
AAAAGCATCTAGAAGCTCCCCATCCATCATTGCTTGGATGTTGCCACTTCATATCCAGTCCCTTACATCT  
TTCCACCAGCGTATAAGGCTGAAATACATAATTACGAATCTGAGATCCCAGCTGA TTTCTTT TTTATTTT  
TTCTATCTATATTCTG TTTCTC TAAACGTTCTTGTAAACAACCTCTGG TAAATCCTAGCGCGCAGCATATT  
CATACAAGCTTCTCGGT TTTGAATTTGACTACGCTCATTCTGACATGACACTACAATTCCCGTAGGGAAG  
TGTGTAATCCGTACCGTGAATCTGTTACGTTTACATGTTGTCTCCAGCTCCGGAAGAACGATACGTAT  
CAATACGAATATCTCCGGGATGGATCTCAACTTCTAT TTTATCATCAATCTCTG GAAACACTTCTACTGA  
TG CAAA ACTAGTATGCCG TTTTCGCATTGCTATC GAAAGGAGATATGCGTACCAGACGATGCACTCCGCTC  
TCTGCT TTTAGCATAGCCGTAGGCATATTCACCGACGAGCTTCAGGGTGATATGCTTAATCCCAGCGACTT  
CCCCATCCAATCGATCGATCACTTCTACCCTCCAGCTATGACTACTAGCCCATCGCATATACATGCGCAG  
CACCATCTTACCAGTCACAAGATTCCGTTCCCCCTGCTCCTGCATTAATGGATA GAAAACAGGAA TTT  
CGATCTAACTCACCA GAAAGAAGTCTGAGTGT TTTCCATTCTGTTAT TTTTC TTTTCACAAAAA CAAATT  
CTTT TTTCTAATTTCTTT TTTGCATTTCTAAATCTTTTGAAGACTCTTCATCTTCT TAAAAAGAATTGTATCGT  
GGAAAC TTTGTTTT TTTAATTCAT TAAATCTGATAACTGTTGT TTTAATCGAGCGATCC TTTTCG GAAATT  
TTCCCTGCACGAGCAACATCGTCC CAAA AACCATCTTGACCCGCTGCTGTTCCAATTCCTTTA ACTCAT  
TTTC TTTTCCTCCGGGT CAAA GAGACCTCCGAGT TAAAGC CAAA CTTCAAG CAAA ACTTCCAATCGTT  
TGT CAAA ATTCTCATGCATAATCTTGCTAACCT TTTTCG CAAA ATATCCAACCT CAAACTCTTCTTT TTTCAA  
AGAGCTAT TTTCTTGCCAGTTAT TTTCCACTATTACGGTGGCGGTGACAGCT AAAACACGCTCATGGTAA  
CATGATCTTCTCTTAGGGATCAAT TTTCTTGCGTAATAGTCCGAGGAA TAAATCGT TTTCTAATTCGCTTT  
TACCCTCTTCTTGTGCTGAAGACTTGCTATGTTTT TTTAT TTTGACGATAAAA CCTAGTTAAGGCATAAAA  
AGTTGCGAAGGAAGAGCCCTCAACT TTTCTTATCACCTTCTTTA ACTAGGAGTCATCCATGAGT CAAAAT  
AAGA ACTCTGCT TTTCATGCAGCCTGTGAACGTATCCGCTGATTTA GCTGCCATCGTTGGTGCAGGACCTA  
TGCCCTGCACAGAGATCATTAA GAAA ATGTGGGATTACATTAAGGAGAATAGTCTTCAAGATCCTA CAAA  
CAAA CGTAATATCAATCCCGATGATAAAA TTGGCTAAA GTTTTTG GAACT GAAA AACCTATCGATATGTTT  
CAAA TGACAAA ATGG TTTCTCAACACATCAT TAAATAAAA TAGAAA TTGACTCACGTGTTCCCTCGTCTT  
TAAGATGAGGA ACTAGTTCAATCTTT TTTGTTTCGTT TTTGTGGGTATTACTGTATC TTTAACA ACTATCTT  
AGCAGCACCTCT TTTGACATGGG TTTGGGCCAATCACTTAGAGCCTAACCTATTGAGAGTAACCGG TTTA  
AATTGGAATCTGCC TAAAAAATTTGCTCATCTTCATGGGCTTCGCATTGTACAGAT TTTCCGGA TTTA CACC  
TAAA CCACTCGACGCCGTGATGCC TTTCTAAAAAAGTATCTCGCAAGATCTCTCTC TTTCTCCAGATAT  
TCTTGAT TTTACAGGAGAC TTTGTCTGTGCGCGT AAAAGTAGAAA CTCCT GAAA GAT TAAAACAT TTTCTA  
TGTCTCTGCATGCGCCCTTAGGCTGT TTTGCTTGCC TAG GAAA TCATGATTACGCCACCTACGTATCCC  
GTGATATTCACGG GAAA ATTAATAACCATCTCAGCAATGAATAGCCGTCC TTTAAAAAAGAGCT TTTA CCTC  
TG TTTAT CAAA GTCTATTCGCCCTTCTCGCAATGAA TTTGCAGATACTCTGAATCCA CAAA TTCCTAAT  
CCACATCTAGTCAGTATATTACGCAACTCTCA TTTCAATTATTGCATAAT CAAA GCGCGACACT TTTCCG  
ATACAATCAACATCGTGGGATTAGGCGATTTT TTTG CAAA CAATTCGATC CAAA AAAAGCT TTTACTAA  
CTATAATCCCACGTTACCTGGTATTATCC TTTCTCATAATCCCGATACGATTCACCATCTCCAAGATTAC  
CCTGGTGATGTTGTT TTTCCGGGCACTCGCATGGCCCT CAAA TCTCTCTTCCCTGGCCTAAG TTTGCCA  
ATACGATAACCAA TAAACT TTTCCGGGGTTA GAAA ACCCAGAGCTAGCTCGAGGATTATTCTC TTTCCCTGA  
AGAGAGTAGGCTCTTGTATGTAAA CCGAGGACTAGGAGGATGGAAGCGTATACGAT TTTGCTCCCTCCA  
GAGAT TTTGTTTAA TGAGGTGCCTCTATGAACCTTAGTTGTTCCCTCGTATTGTTAGGAGGAGG GAAA GGC  
GAGCGT TTTAATTCCTCCAAC CAAA GCAATACACACATCT TTTGTGGGGAGCCGCTAATTCTTCATGCCT  
TACATGCCTACCAACGCCCTACCG TTTGTTCAAGAAGTGGTTGTTGTCTGCGAAGAGCAGTACCGGGA ACT  
ATTTCTCCCCTATTCTGT TAAAA TTTG CGTCTCCCGGAC TTTA CGCCAAGATTCTGTTT TTTCTG GATTA

CAACAAGTTTTTACCCTTGGGTATGTATACACGATGGGGTTCGTCCC TTG TCTACGCGGACGAAGTCA  
TTGAAGTTTGCTCCGCTGCACG CAAA ACTGGAGCTGCAGCTTTA GCTTCCCCTGCAACGTATACTAT TAA  
ATCATGTGCACCCGTTCCGACCTTAGATAGAGATGC TTTAGCAGTTATCCATACTCCTCAATGCTTAGAT  
ACAGAAGTCTTGAGAGAAGGACTTCTCCTTGCCCGCCTATGGA TTTCTCTCTATCCGATGATACAGAAG  
CTGCTGAATTACTCGGCATAGAACCTACCTTAGTATTCAGCAACAGAGTA CAAATCAAAGTCACTTATCC  
CGAGGACCTCTTATTCGCA GAAA CTCTCTCCAAGTCTCTACCTA TAAA TAAGCCTTCCCATGA CAA  
AAAAAATTGTTTACAAA TCGCTTATCAAGGAACATCCTACTCTGGATGGCAATACCAACCTAATGCCCT  
TTC TATCCAAGAAGTCT TAAAAACAATCCT TAAAA AAAATAGCAGGC TTTTCGCA TTTCTGTAAT TTTCTTCT  
GGACGTACAGATGCTGGCGTGCATGCTCAGGGCCAGATTGCTCA TTTCCATTGCCAGACCATCCACAT T  
TCACGGATCCCAGA CAAATC CAAA AGATGCTCAACGCCCTATTACCTCATGATATTGTCATTTCGCGATGC  
TGTCATGACCGACGGAGA TTTCCATTCTAGAT TTTCTGCCATAGC CAAA GAATATCGCTATACGCTATCT  
CTACTTCC TAAA CCTCTCCCTCATCATCGCTATTCTGT TTTAGTCCCTCGTTA TAAA CTCAACATAGCGC  
GTATGCAAGAAGCAGCTCAATACCTTGTAGGCACACATGAT TTTGCTTCTTTTG CGAATCTAGGAAGAGA  
GTACTCTTCTACGATACGCACTCTCTATACTCTAGA TTTATCAGAACAAGAGCATCTCGTTACTGTCTATA  
TGCAGAG GAAATGGC TTTCTTTACAAA ATGGTACGCAATATTGTGGGAGCTCTTCTCGATATAGG GAAAG  
GGAAA TATCCTCCAGAACATCTTCTCGATATGCTAGCAAC CAAA GATCGCCG CAAA GGTCCCTCCTTCAGC  
ACCTCCGTACGGACTATC TTTA CACCACGTATGCTATCCTCCCCCTATCAGTGGTCTGCAAGCATGAA  
CACAATAACTCTAGCGAAGGGGAAGTAATAATACTCC TTTTC CAGGGAATAAGGACTGTG TTTGCTCTAGAG  
ATCGTCTGCATTGATAGCTACCATAGTGGCTGGGATTCCGGCTAATGCCTGCAATCCT TTTA CACTATC  
CTCAA TCCGATTACGTGATCTCCTTCTCTTA CAAA ACGATTCCATGCTAATCGATAGCTATCCGGGGCA  
GG TTTAGGACGTGCATATTCTTCTCTAGTTATC CAAA ATTGCATACACTCTAAA ACCGGATGTTCTTAC  
GGATGCGTAGCGTAGACTC TTTAGAAGAGTTGGTTACAACACC CAAA CAT TTTCTTCCAATAAGGAGAG  
AAACG TTTTC CACACCAGGCATCAGCTGTATCTGCTCACAAGATAGGAGATCATGTAACACCGATCTCTA  
TCTAAA AAATAACTTGG GAAAAAGGCTCGTG TTTC AGGGAACAGCTGTAT CAAA GCCTCTTGAAA TCGTT  
CCCTCCCTTGCATCGC TAAA GAATAAATATTGGCT TAAA AGAGAGTTCGACAGAGACCTTATACTCTGCCA  
TGCTCT TAAA CAGGCTTGATAAAA TAAA AGGCTCGGTATCAATTAATAATCCATCTAAGTC GAAAAAATAT  
ACCTCATAAGAATCTAGACGCATAGCTTCTCTCTCCTATCAGGGAT GAAAGTACTAGATCTTGTACTTT  
TC TCTAACGAATATATAAGCCTTT TTTCCATTACGCGG GAAAC TTTATGAACCTAATACTCCTCCTTACGT  
TATGCTATCGAGCCT TTTATCAGGGTGTCAACAGACAATCGC CAAA CCTCTTATATCGAGGCAGCCCG  
CATCACAAC CAAA GCTCAGGCTCACTGATCC TTTA CCCCCTGATCGAGCCTCGCTCCGCTCCTACATAC  
CACTGGCCTACTCC TAAA TCCCCGGTCATTACAAA CTACTC TTTCCACTGCCATGGCACGTCTGGATCAC  
TATCTACAGAA GAAA CGCTTGTCTTCGACTGCAATGGAAT CAAA CACCTAGC CAAA CCCTTTTC TATTCA  
TCCACTCCTAGTGACTATTGCACAATACTTATCATCATCACTTCCCTATTACTATTGAAGAGGGATATTGC  
TGTCCTATGCACATAAG TTTCTCCTA ACTTCGGATACATCCATATCCGAACAACATTG CAAA GG TTTAG  
CAGCAATAGTCTCTACTCAACAACAGTATCTCCT CAAA TGCTGGCTCCTATTCTCTAAGCTGTATAG  
AGGCTTGCCGCTTCTTC TAAA ACATTCACCCTCTCTCATAATACAATT CAAA ATGAAGAT TTTA TCATC  
ACCTCTACCTT CAAA AAGGG TAAA CCTGTGCTGGTTATTGAAGTTCATCATGAG TAAA TACCTCTGCTGA  
GCGTAT TTTCTCTAA CAAAAAACCTTCTCTCCCTTATAC TTTG TCCCTTAAAGGATA TTTCTGTGTCAGG  
GGAA GAAACTCTA TTTCTTCTTCTGT TTTCCAGACCTAGATGGTTATGCCGGCGTGGCGGAATGGTAGACG  
CGGTAGACT CAAA ATCTACTCTTAGCAGTAAGGTGTTGGTTTCGAGTCCAATCGCCGGCATTAAATCACAT T  
TCATGAT TTTATATTGCTAATAATTCGTAGGACCC TTTCTT GAAA GAGAACGCGAACAGGCAACTCTTTT  
ATGAAA GAATCCGCTCTTCTCCC TTTATTGAA GAAA AAAAAAGGCTTT TTTCTTATCAATCCTTGATCTAA  
CTCAAGTCGAAGCTTCGCTCTCTCCC GAAGATCTCAT TAAA GTATTACGGCAGAAA AAAACTCT TTTATC  
TTGTATAGAGAAA GTCGACCAT CAAAT TAAAAAA TTTCCGGGATAG TTTCTCT TTTAGCACTTCCCAAGAA  
GTGCAAGAAGAACTGGAAGAAA TCCGATCTGTTATTCAGCGCATTTCTAGAAA CAGACAAAAAAAAC TATT  
GTATAA GAAAAAGAGA ACTGGGAAC TTAGTGC CAAA AATCGACACTTGTGATTCTTGCCTTTCCAAATACCG  
AACT TTTGGCCATTTCGTACGCGAGTAACACAATCGTATAACGAAGCT CAAA CCATCCTATCTTCGATTCC  
CGATGGCATT TTTCTAC TTTCTGAATCTGGAGAGATTCTGA TTTG CAATCCCCAAGCCCGCGCTAT TTTA  
GGCATCCCTAAGGACATCCAGCTGGTCCACACGGAGGTTCCATGATTT TTTCCCGGATACTTTT TTTG GAT  
TCTCAGTACAAGAAGC TTTAGAAA AAGAAGTCCCTCC TAAA ACGATTTCGACTAACCCTATCTCAAGAACT  
CTCC CAAA AAGAGGTTAGAAAGTT TTTG TTAG GAAA AATATCTCTCACGGCTTCCCTTCTCCTTCTCATCCG  
GACCGGTCGGACTATAGGCAATTAGAACAAGCGATT GAAAAATACCGCAGCA TTTCCGAGTTAGG GAAA  
TAGCTGCAACTCTAGCACAT GAAA TCCGTAATCCTCTAACTAGTA TTTCCAGGATTCGCAACCTTACT GAA



AGAAGAGCTCTCTTCAGAACGCCACCAACGCATGCTCAATGTCATCATAGAAGGTACTCGCTCAT TAAAT  
TCTCTTGTTTCTTCTATGCTTGAATATA CAAA AATTC AACCTCTGAACCTTCGTTCTATAGACCTACAGG  
A TTTCTTTTCTTCTCTCATTCCAGA ACTCTCTTTA ACC TTTCTTCTTG TACA TTTA GAAGA ACCATCTT  
ATCTCCTATACAGCGCTCTATAGATCCTGATCGCTTGCATGTGTGATATGGAACCTTG TAAAAATGCC  
GTCGAAGCATCGGATGAA GAAATC TTTCTAGAACTACAT GAAA AAGGGT TTTCTGTTATCAATACCGGCA  
CTCTTCTCCTAATATCCAAGAAA AGCTT TTTA TTCC TTTCTTCACTAC GAAA CCTCAAGGGAACGGTCT  
AGGCCTAGCAGAGGCTCA TAAAAATCATGCGCCTGCATGGCGGAGATCTGGTTG TTTCAACCCAGGATAAT  
CGTACTACC TTTA CCATCCTATGGACTCCTGCTTAAAGAGCAGTTAT CAAATG CAAA ACACTCACCTCTGA  
AA AACCCCATGTGCGATAGAACACAT TCTTATTATTGACGATGATCCCCATATCCTGGCTCTTC TTTCTGA  
GATACTGGGCGCTCGGAACT TTTCA GTGTCTTCTGCTCCAGGAGT CAAA CAAGCTATTAAGCAGATCTCT  
AACTGTCC TTTCTGATCTGATTAT TTTCTGATATGAATATGCCTGATGGTTCAGGATTTGGATATTATCCAGT  
ATA CAAA ACAGCATCGTCCG CAAA CCCCTATCTTGGTCATTACTGC TTTCTGGA ACTATT CAAA ATGCTGT  
TGAAGCTATGCGATTTCGGAGCT TTTA ACTATCTGAC CAAA ACCGT TTTCCCCCGATGCCCTTTTACTTTA  
ATCGC TAAA GCCGAAGA ACTCCAAGCGCTACAACAAGACAACCTA TTTCTACAATCACAAGGATCCTCCA  
TCTCACATCCTCTGATCGCC GAAA GTCTTTCCAT GAAA CAGCTACTTGATAAAA GCTCGCCGAGCGGCTAA  
CAGTTCGCGAATATATTCGTACACGGAGAATCCGGATGCG GAAAA GAAAATC TTTCA TTTT TTTATCCAC  
AAGCACTCCCCTCGATCTACTAAGCCCTATAT TAAA GTCAATTGTGCTGCTATCCCCGATACTTTGTTAG  
AATCTGAGTT TTTCTGGGCAC GAAA AAGGAGCT TTTCA CAGGAGCAACCACGAA GAAA GTAGGAAGA TTTGA  
ACTCGCCACCAAGGCACTCT TTTA CTAGAT GAAA TCACAGAAA TTCCGATCCA TTTGCAAGC CAAACTT  
TTG CGGGCAATACAAGAACAAGAATTCGAACATATTTGGAGGAATAAAA AACCTCCCTGTAAA CATTCGAT  
TTCTAGCCACTTCCAATCGTGACCTTGAGGAAGCTATT GAAA CAAA GTTCTCCGTCAAGATCTCTACTA  
TCGATTGAGTGTGATCTC TTTA CACATCCCTCCCTTCGCGATAGAAA AGAAGATATCCTCCC TTTAGCT  
CATTACTACTTAGAAA AAT TTTG TAAGATGAATAATAAGCCTC CAAA AACATTGTC TTTAGAAGCG CAAA  
GAAA TCT TTTG GACTATT CATGGCCTGGGAATGTTGAGA ACTCTCTAACGTA CTGAA CAACTGTTAT  
TCTAGAAA ACGATCCTGCGATCACTCCTTCTATGCTCGCTCTCTTATAATGATTC TTAACAGGAGTT TTT  
CTTGAT TTTCA GAAGCT TTTCTGGTAACCTTGGGCCCTTCTTGTGCACCGATAGCTCAACTGGATAGAG  
TACCTGGCTTCGGACCAGGTGGTTGAGGTTCGAACCTCTTCGGTGCATTCCTC TAAA ACTTCT TTTCT  
AATTTT TTTA TTTCTAGTATAAGCGACCCGTTATAGCTCGCTAATCACAGAAGTCTT TTTAATCCTATGAG  
CACCCCTCCTACAGATGCGCATTGTCTCTTCGATCCTATTCTGCTG TAAA CCCGTCCCTCCC TTTCTCCGAG  
GAGCACGTTAGACAGGC TTTGCTCTCG TTTCTCATCCAAGAGCTCTCCTATCCCCAACACAGATCATTG  
TGGAAA AAGGAAT CAAA TCTTGATTTCCAGCATCACTCCCGCCTCTCCC TAAA AAAATGCGAGGAAGAGC  
GGATGTA CTTATCCTATCTCCCTCCTTACGTCTCTTCAGAAGGTGCTTCTA TTTCTTTTCCCATCCT  
CAGCCCCTACTATTAATAGAATG TAAA GC GAAA ACAGTGACCTCTCTCTCTTTCA GTCAATTGATTAGCT  
ATAACTAT TTTATCGGGGCCCTGTCTATCTTAATTAGCG CAAA CTCTCAGCTCACAGGTTT TTTATC  
CC CAAA GACAAA AACATTCGCTT TTTA CCAAGGGATTCCTTCATATTCTCAACTGATGA ACTTCTATATC  
CATACT TTTCATG CAAA TCACCCTTCCCGAGTGTCTAA CAAA CTCTCCCGCTGAGAAA CAACATGT  
TATCG TAAA AAT TTTCTCGCCAGCAGGGCTTC TTTCTGTCCTTCG CAAA AATGGAGCATCCCTATCCTGC  
GAT TTTCTGAGAGTCTCTGTTCCCA TTTCTTTTAGCCT TTTCA CGATTCAACAATCTCCTCC CAAA ATGC  
GAAA AGTCATACAGGGGGAGCTC CAAA ATCTTTCA CAACGAT TAAA AGTTTCGATCCACT TTTG CAAAG  
CGCAGG GAAA ATGATTC AAGCGAT TCT CAAA ACGCAATGGCAT GAAA AGCCCTCTCCCCATCTCT TTTCT  
CTTTT TTTA ACTTCTTCAACGAATTC CAGAAA CGCAATACCCTAATTTTT TTTCTCTCGATGTTCCCTAC  
TAAA ACTCTTACAACATGAGGGAAGCCTAGATCTATCGCGCTCCTGCACCTTATG TAAA ACTTCTTAGA  
ATCTTCAACTA TTTA CCGTTATGAAGGAGCTCTAT TTTGT GAAA AACATGCTCATGAAGAAA CGATCTCC  
TTCAGCCAAGAAGAAGACCATAT TTTA AGAGTGATCGTACAAG CAAA AAAATTC AAGAGCTCG TTTGTC  
TAGCAGAATTCCTATCGACATCGATA CAAA AATAGATGCCCTATCTCCTCCTTCC TTTCA GAAA CATC  
CGAGCCTTCTCTATATTA CAAA GG GAAA ACGCTTCTTAACGGG GAAA AATAACTCCTCCATTACGA  
GTCTCTACAT GAAA AGTTAGCGTCACAGGGGATTCCTAC CAAA GAATTCC GAAA AGT TTTCTTCCAAA  
AACCTCTTCTCTCTTGATTAGTGATCCCTCTGCAACTACT TTTA CTATTTCATATCAACCTGCGTATAGAC  
AACTACACCAATGTC TTTAGGTAACATAATTGTAATTGGCTCTTGCTCATTACGAATA TAAA TAGACGCA  
TTCTT TTTCTCACTCCCCTC GAAA ATC TAAA TCCATTCGTCAGGAGGTACAAGAAA GATTTA CAGAAGACA  
GTTCTGGACTCTCCC TTTAT TTTCTGAACGCAGCAATC CAAA AGATCCCTTA TAAA CCACGCTCTCCAA  
CTTAGGGAAGCTTCCCGTCACAT CAAA TTGTACACGTTTTTTTTCTTTCTGTCATGGATTTCCATAG TTTCC  
ATATCTGGATACTGCCAGAGAAA CAAA CCGATCCATA TAAA ACTGCTCTTCTTCCGCAAGAAA ATGCG

CGCCGAAAGCGGGTAAACTCAACGTTCCGAAGATTGTCAACAAACAAACTAGTATATGCACAATAACGCC  
TCTCTTCTCCATCACGAAAGAAACAAAGCTCTACGCATGCACAACGAACCTATGCAAGCAAAAACCTACCG  
TCAGCATACTAGAAAAGATAAAAAGATTATCAAAATGAAAAGCAAAAGAGGATCTGGATAACAAGGAAAT  
CTTGCAAAAGAGGGGACTCGAACCCCTAAGGAAAGCTCCACTACCACCTCAAGATAGCGCGTATAACCAAT  
TCCGCCACTTCCGCAAAAAGAAAGACATGAAGAACCAGCTTACTCTGATTGGACTCTTTACTACAAGTAA  
AAAACCTCTCAGCTTACAAATTCTATCTATTTTAAAGAAAATAATGGAGGGTTTATCAGAGAAAACCTCT  
TATCCTCTCTATCTCAGTATCTGCCATACTCAAAACAAAGTCTCTGCAAAAGGCTCTGCAAAAAGCCTAT  
CCCCATTATTGTAAAGAAACCACTGAATATGAGACACTCTTCCTTTCAACGATATAGATGTAATTTCTACCA  
TGCGCTGTTAGCTTATTGCACTGCTTCATCCTATCACTTGCACGTGCTCTTTCATCTTCTAAAAGTAAA  
CTACCCCTCAGTTCTATCCCAGAAATACGTGCTGATTTCTCAGAGGAAGTATGAAAGCGACAAAGCT  
GCTGTTTTCTTCCCTTTTGGCGTTTGGCGTGTCTGGGGCTGGGAAAGAACTGAAGAATTACAAGTGATCC  
GTGCTATCACCCCATCTGCAGTCAATCCTCTTCCCAACCCAGAAATCGATAGTTACGATTTTCCATTACGG  
AGAGAAACTCAAAATCCGTCGCGATAGGCTGGTTCTGACTAACTCGAACCTAAAATAAAAACCTTGCTATT  
TCTTTGATTAGCTCAGTCTATCAAGCTTACAGTTTTCGAAAGAAAGATTTTACAAAACGGTTGAAAAC  
CGAAAATCTTCCCAAGAAGTACTGCTTCAAAAGGAAAATTTCTCTATCCCCTAAAACGATTGCAAAAA  
AATCGGGGAAGTCTTCTAGATAAAAAGCTTCTGTGAACCTACACTCCGATATCCTTGATGAACCAGATTTT  
TTCTGGGAACATCCAGAAACTCAACCTTTTATCATCAATGTTTTAACTGCCTAGACGTCAATGCTCGCG  
TAAAAGTGTGAATCATAGACTTGCTATCTTAGGGGACGTTCTTGAATTTCTTAATGACCAACTAAACCA  
TCAACACTCCTCCGCTTTAGAAATGGACCGTAATCTGGTTAATCGCTCTAGAAGTGTGGTACACTACTG  
AAAGACGTGTTTAAACATCATATAAAAGTTATGCAAACTTCCCGATCAGCTCTTTTTCGAGGGCTTGT  
TCACCTGTACCGTTGGGCGATTTCTCCTTTTCTCGGGGCTCCTGTGCTGTTTTCCTACATGCTCTGAG  
TACGCTCTTGTGACATAAAGAAAATCCGCTCAGAAAAGCCTTTTCTCATCGCCAAGCGCTTACTCA  
AATGCGGCCCTTGGTGCATAGGAGGTATCGATCTCGTCCCTAGAAGTCTGTTGAAGAATATCTCAGTTC  
CCCTACCCCTCTAGCAGAATCCCTGACGACAGGACTGTGCCACACACCCCAAGAAAATTTCTTAGTATAGT  
GTGCCTCTCTAGGCAAAAGTTGAAATAAGGATTGTAAAATCGCTATCAGAAAACCTCATGCAACACCCAGTC  
CGGTCATGTACTAACAAGAGAAGAGCTGTAAAAGTTCTGTCTATCCACATAAGCTTTTCAGAAAACAG  
CGCCTCTGATGATCAGAAATCGCCGTTTGACGATTTTCTAAAACAACACAGGGAAAAGAATAAGTCTTCC  
CTCCTTGATAATCATTTCTTCCAGAGAAGCGACCGAAGCAGCTTCGATTTCCGCACAAAAGGAGAGA  
ACGCACATAGAGAAACTCAGGAAGATGCAAAACCGATACAGAACATCTTCATCCACCACCCCTGCTTCA  
CAATCACGCACCATAATACGAAAATAACCTCGTGAAGAGAATGGGAACCTCTCTGTAAGCAAAATCTGAC  
AAATCCGTGTAACCTCCTGATCATTAATATCCGGAAGTAACCAAGTACGTTTTCAGGACTTTTGAGTTTAA  
AAAAGTTAAAGGATGCGTCAGCATAGGAGCGATATCAAAAATATTTTTGATGCTCACCCCTAGAGCC  
CAAGATTTTAAATGGATGGCCGAAAACCACTCTCTTCCGCAACAAGGCTAAATAATCGGCAAAAGAA  
CATTTCTAGTCTTTCCAAAATGTCTTCAGGAATCTTCCCTATTCGTGAACCTTTAGCGGATGAGATCCC  
TGGAAAACCCCTAAATTTATAAAATATCTTTTCTAAATACGGTCGAAATAATCAAAAGCAGTAATAGGATA  
TTCACAATAGAATAAGAACGAGAGCTTGCCTGAGCCATTTAATCGTTTTTTTACTTTGCATAGCTCCTG  
ATCCTCTTCCCTCTATCCCATAAAAACCTCCTACATCCCTCTCCCTCAAAATACTTGCTACTATACACGC  
CACTTCGTAATACTACCAAAAAAAGCTGCATTTACTCATGCTCGTTCCCTTATCCCTATTACAAAAT  
TCTTCTTCTCCTCTCTCTATTGAGGAAATTTTACAAGCCTGTGATCGTATTGGAATCGAAGCGGAATG  
CTCAAAATGTTTTTCCGATTCCCTTAATACTGTTGTAACAGGAAAATTTTAAAGTGCCTCTCCTCATCCT  
GATGCAGAAAGACTTACTGTTGCCATCGTTTTTACGGGAAGGGTAAGCGCAAAATCATCTGTGGAGCTC  
CCAATGCCGAGCAGGCATCATTGTTCCCTATAGCCTTACCAGGAGCTAAGTTACGTAATGCTTCGGGAGA  
AATCACTACAATCAAAAAGCTAAAATTCGTGGGCTCGAATCACAGGAATGTGTTGTGGAGCAGACGAA  
TTAGGGTTCCCTCAATTACAAAAGCACAGCGTGGTATTTTTGAAGTTCCCTGCAGATACTCCTCTTGAG  
AAAATGCTGCATGCTACTTGTGGAGCTTCCCTAGAATGCTCGTTAACCCTAAATTTAGGCCATTGCGC  
ATCCTTACTAGGCTTAGCAAGAGAAATTTCTTTCTATCCCCTGTATCTCTTAATATCCCAGAAAGTAT  
TCTTTTGCCTCGCTTCCCTCAAGAACTTCTATTTTGTGATATGCACGATGCTGGAGCTTGCCCCGTATTCT  
ATTCCGTCAAAATCTCGGGTCTATCTTGTGACGATCCCAGAAATATCTGCAAGCAGCCTAACAGCTCT  
TGGACAATAACCTCTAACGCCATCGTTGATATTACGAATTATGTGATGCTGCTATTAGGTCAGCCCTA  
CATGCTTACGATAGCCAAGCGGTGGAGCAAAAGTCTCTCCATGCAGTACTCTACAGTCAGCTCAACCAC  
TTACTCTTCTAAAATCAAAGAAACCTATACCCTCCCCGAGGATCTTTAGTTCGTTGCTGATCAGCATAAT  
CTTAGGATTAGCTGGGGTCATGGGAAGTGTGCTGCATCTTCTTGCTCAGAAAATACAACAAGAAATCATCTG  
GAAGCCGTTACTTCCAACCTCAGGCTGTAAAGAAATATCAACGCACGATACAGCTGCACACAGAAGCTG

CCTATAGATTTAACCCGAGGAGTGGATCCTCAAGGCGTATTACCAGCGTTACATGCTGCTATCCATATGAT  
TCAATCTCTATTTCCGGATGCTCAAACTCTCTCTATTCAAAAAATGGAGATGATAGCTTTTTCCTTTG  
TCTTTAAGCGTTTCGCCATAAACGATTAAGAGACTTCTGGATATTGAGCTCTCGACCGCAAAAAGTTG  
CCTAACTCTTTCTTTAAGGATTTCAAAACAGCAGTAGAAGAGCAGGCCGTTTCGAGTCGAGGTCCCCTCTTA  
CCGTCATGACATTCAGGAAGAGACCGACCTTGTGAAGAGATCTGTGCGACCACACCATTTCGTTCAAAAA  
ACAATAACTCCCGACCTATACTCCGATCTATTCTTTGAAACGTGAACTCACAGCTTTCCTTAGCAA  
ATGGTGGGCTACAACAATTCTTTAAGCTGCTCTTGGTATACAGAAGTATCTTCCTTATCTTTGCAAGA  
AAGCTCTTTGATTCTGTACAGAATTCTTCCTGAAATTACGCGACTCCCTTCTTCCTGGGATGCATAAA  
AGTGCGGCTACTAACCTCCATAGGCAAGCCCCCTATGTTATGCTTTTGAAATTGAAATGTGTACTCGA  
AGGAGCAGAACCGTTACCAAGAGGAAGAGCGTGTGCTATTTAAGCTCTCTCGCCAAGTAATGGATGATTC  
CTGGCAAGGAAAACACCTCTCTCTTTTATACAATCAAGGATGGGTGAAAACCTATTATGCCAGTCA  
GGAGCTTCTATAGAAGACTTTCCTTCAACCCAGCCAGCATCCGAACTTTCACCCTTATCAGCAAGCTG  
CCTTGTATCAGAAAACATCTATTAGGCATCTTTGGACGTTGCACCCACAACCTATGTAGAAAAGCTCA  
GATCAACACGATGTAGTCTTTGCTGAGCTTTCTTTAAATGTGCTTTTGTCCTTAAAAAGAAAATCCGGA  
CCTCATACGTACCCTATCCAATCTATCCAGCCTCTTCCAGAGACATTACAATTACAATAGATAGAGATC  
TTCCAGCAGATCTCGTACGCAGAGAATTTTAAGTTTCGAATCTAAATGGCTTAAAGTGTTCATATTGT  
CAGTGTATATCAAGGGAGAGACTCTGCATCTCAAGTAAAAACGTTCTCTTCGGATGGTCTTCCGTGAT  
CACGAACGAACCTTATCCGGGCAGAAATAGAAGAAGAATACGAACGTTTAACTGCATTACTTGATAAGA  
AATTAGCCAACATAGGACAAGGCAACTCATGAAGCGTTTATTTTATCTGCGCCCTCGCCCCTTCTCCT  
CTAGCATATGGAGCTGTTCAAAAGGATCCTATGTTAATGAAGGAGACTTTCCTGTAATAACTACGGGATCA  
TTGTCTCTAAGCAAGAATGGAACTAAAGCTGGATGCGATGGCTCCATCACTAGAGTATTCAAGATGGAAC  
TACAACCTTAGAAGTTTATGCGCAAGGTGCTTTACATGGGGAAGTCACACGAACGTTTCCTCACTCTACT  
ACCTTGCCGTTATAGAACTTATGATCAGGGAAGGCTTCTTTCTAAGAAGACCTTCTTCCCAATGCTT  
TGCTGCTAAAAGAACGATTTAACACGAAGATGGGTCTTTCCTCCCTAACACGTTGCGCTGACAATAACAA  
CTCTGACACAATCACAGACCCCTGCTTTGTAGAAAACCTTATGGGGAAGAGTATTGGAAGGTCATTAC  
ACCTCTTTTAATGAAATACTCTTCAAAAATCCTTAAACGGCGAGGGAGTTCGCTCTACTTTTCTTCGG  
ATAGTATCTTGTGACAGAAGAGTCGTTAATGATGGCGTAATGGTCAAAAAACGACATTTTACTCGAC  
TCGAGAACCCGAAACCGTCACTCATTATGTCAATGGTACCCTCACGGAGTTCGGTTTACCTATCTTCCCT  
GGTGGGATTCCAATACGATTGAAGAATGGCGATATGGACATCAAGACGGCCTTACAATCTTATTTAAAA  
ATGGTTGTAAGATTGCTGAAGTCCCATTTGTACGCGGAGCAAAATGGAATCGAACTCCGATACAATGA  
ACAAGAGAATATCGCTGAAGAGATTTCTTGGCAGCACAACTCTTGCATGGAGTCCGCAAAATCCATGCG  
GCGGGGTATGCAATCCGAATGGTATTAAGAGCAAACTGTCTCGCAATCAAGTTTGAACGACTCA  
GTCCCGCAGATAATCAACCTTGGGAGCGTCAATGGCTGAAAAGTTCTTGTTGTCTCTCCAACGTCCAA  
GAACTGTTTGGCCAGGCTTGTCTCAAGGCTTCTTCAATAAGACTCCCCCTATTCAATATTATTTG  
CATTTCCGGGGAGATTCTATTTTTCACTCAAGGCTCTCTCCCGCTCCCGTTTTCCTGTTTATTCCTTG  
GACCAGGAGCACATAAGGCTATGGAAGGACTTGTCCGCTGGTGTGAAGCCTACGCCAAATAATGCCGCC  
TAACTATCTTTCTTGTATCTATCCTCTTTCAAGAGAAGCGCTGGCAATCCTACAAGAAATACGCCAA  
ATCCCCTTCCGCACTCGTCATACCTGTGAAGAGATTGCAGAACGCAAAAAACCATAACGGAAGAGGTGC  
TCATCGCCTGCCAAAGAAACCCCTTACCCTACTGATTCCTGCCATCGAGTACTTTCATTTCATGACTA  
CCCGGGCGGGGAAAGCTTTTACAAAGCCCTTACCGAATTTGAAGAACTCTCTTAATCCTGCATCTTAGGA  
TCTAACGCATCCCGAATCCCATCTCCAATCACAGCAATAGCCATTAACAACAATGTCAACATAATAGCGG  
GAGGCCATAGAATGGCGCTCTCTGATGAAATGCTGTGACTCCTTCTCGCAAAAGATTTCCCAAGATGC  
CGAACTCTCCTCTCCTAACCCTAAAAGAGTGGCCCTGCTTACAGCTAATCATAGCCATCATCGAGAAC  
GGCAAATAAGAAATAACCGGAACAATCACGTTAGGAAGGATCTGATGCACCATAATATGGTAATGGCTGT  
AGCACAAGTTGGTAGCAGCTAGAACATACCCTAAATTTCTTTGCTTTAAGGTTTCATACGCACATAGCG  
ACTAATACTGACCCATCAAGCATCCCAGCAATACCGAATCTAATATGAGAGATTTTTTTTGTGTAATA  
GCTACCACGAGCATAAGAAATAACAACATGGGCATGGTCTCCCAATTTCTGTCACTCGTGATAATAACA  
TGCTACCTTGCCACCAAGTAGCCAGATAACAATCCACAATGATGCCTATAAATAAGCTATAAAAC  
ACCAATCCACCAACAACGATCGCAATACGAATCCCAAGATCAGAGAAGCGAGTAAATCCCTTCTATTA  
ATGCGTGTAAAGCTGCCACCAATGCACATACTTGTTCATCTCTCGAGATCCGCCGGCATCATCTTCCAGT  
GAAAGCTGCTTAATAATGGATTCAAAACCATTTGTACCTGTTGACTCGGTTTCATCCAATTACGCTT  
ATCCATGATAAAGCTAATCGAATTAATAAGGCTTACGCTCTTCTAAAAGACTACGTAAGAAAGGCAAC  
TGCTCTCAAAAGGAGCCTTTTCTCAAGAGCCTCAACGCTGCACGCAACTCTTCTTGGGGATGTT

GCTCGTATATCGCCATATTCAGAGCATGTTCTGAACGTGCTCTAGCCATCAAA TAAGGACGGTAATCTTC  
CAGCAAA GTTCCCCATCCTTCAAA ACCTTCCGGATAGGAAGCTTTTA ACTTGTGATCTTATT TTTGAAA  
AAACGCAGGCTTGCTGTTTC GTTCTTCA TTTCTA GAAAACGCAGAGTCGGCATCGGAGATTGCTTACACA  
ACTCGTATGCCTCCC TTTGTT TTTCAAGATGATCGTGCTGCATCTTGCGATA TTTGCT TTTA CAAGCAT  
TCCCAGCTGCTCATA TTTACTCATATAAGCACGCTCAC TTTCC AAGTGC GTTCT TTTAGCAATTGTT  
GGAA GAAACTCTGTC TTTGGAGTTGT TTTCAATTCTGTTGCAGATGCTTAGCCCG TTTCTGC TTTAACA  
GCTCATCCCACAAGGATCTTGAAC TCTCCACTCAA GCAAAAGAGAATACCGCAATATGTATTCAGT  
CACTACACCTA GAAA CAGCTT TTTCCACACACCACTGAGATAAC GAAAGCC TAAAA TAAAAACGGCAGT  
GTGAGCATTAAGACAT TAAAAA TAAATCGATAGACTTAGTG TAAA AACCTGG GAAAAGCAAA TAACGGA  
ACAAGGGGGAATACCACTCCCCGTGCCAACGAACAAGAATCGG TTTACTAGAAGCGAA TAAAAGGAGCGTA  
AA TACCAATAAGCATAAGTCCA TAAA GAAC TTTAAA GCTATAGAGGGAAGTGCCCGTCTATTATAAGCA  
CGAAA AAATCGTTGATAAGATG TTTGGGTTCTTCATCTCACACCTTCCTTTCTTCTAGCTGTACACGT  
GGATCAAGAAGAACGTAA CAAA TATCCCCGATTAAGTAACCGATCAGA GAAATCACCAGTCCCATAAATTA  
CGGAAA ACATCACCACATTGTGATCACGA TTTA GAATCGCCTGATA GAAAA TTTCCGAAA CCATCGAT  
ATCAAA TAGTG TTTCCACTACTAAA GCTCCTCCAAGTAGAGCGCT TAAA GACGAGGC TAAA GAAGTGATT  
AACGTAGCTGCAGAGTT TTTCCCCACATGCCGAAC CAAA ATGTCATACTGAGAAA TACCACGAGCTCGAA  
GAGCT GAAA TATGGTCTTCTCCTAAGACTTC TAAAA ATACAGCACGACT TAAACGTGACTGTGCAGCAAA  
AGCTCCGTAAC TGACAGCA CAAA AAGGCAAGAAA CTGTGTAACACAATATCCGTCAGCT TTTCAAAAGAA  
GTCA TTTCTTTGAATA TTTCTGGAGATGAACACAGTCCACTGTAAGGCATAGAAA TGGACGTAAA TGGAA  
CTGT TTTATTTAGAAC GAAAT TATCAATAATCCAAGGACAGCAA CAAAGACAGGAATAGAAA TAAAT  
CAAAA ATAGAAA ATTGAGAAGATGATCTATCCAATGTT TTTA TTCACAGCCATGATCATACCGAACCT  
TGGCATAATATAAAA AACCAATCATAGGAAGCAGGGATAGAATAAGTGACGAACC TAAACGT TTTGATCA  
CTTCA GAAACGACCGTCTTATGACAGTCGTTGCGTAACGTTT CAAA ATCCAATCTAACGATACGA GAAAG  
GTACTTAG CAAA CCGCGTCTCTAA GAAA AAGATCCTCCAGAGATCTCTTCGCATTAATTGCCCTCTCCG  
CCCTCTTGCTCAACCCATTCTTGTAAACGCGGCAAC TTTAACTTCGATATTATCTTCAATCAAA CGCA  
CGAGTCTGCATTGCT TTTAGACACTT TTTGATTATATTTCGCGCTGTTCCCTCCAG CAAACGTGCTCCAAC  
AATCCCCTGACGAATACCTCCTCGAATGAATAAA TCTGCTGCAACATGTCGATAAA TATCCTC TTTGAA  
GAATCTTCAGCCTCTGCAAGCAGCGCCGGCATAATGAAC TTGGCACAATCTCCCAATACACCTTAATAT  
TGGTTATGCTTCTGTCTTACTCTTCTTGTGAATCGTCCCATCAATAATCTCTTGAATCCAGCAGGGAG  
TTCCGATCGA GAAA TCTGTGGTTCGAGTAT TAAA AAAAATAGGGAGAGTTAATCCGTAATGCTCTC TAAAT  
TG TAAA TAACGGTCCGGCCCTTTA TACGTACGAATCTTATCCGATCTCCAGCCTCACCTGGGCATCCA  
CACTATGTTCTCAAGCAGGTCTCCTGGAGCAGCATTTGAGAATCA CAAA ATTCACAGAGATGATAG CAAA  
GAGCGTTAAGGGAAT CAAA AGCAGACGT TTTAAGATATAGCGGAGCATCGACCCTCCT TTTATCTACCC  
ACAACATGGATAAA TTCACTGTCTCATCTTGAGCTCCAGGAAT CAAA TCCTGATGTTCTGTTGGCA CAAA  
AATATTT TTTACAAA CTCCTTATAGACAAGGGAGTACTGTCTTGAATAGAGAAA CGCGTAAGGAGATTCC  
TCATGAATCACCTCGT GAAAACGGTGATACAAGGCTTGGCGCTTATTAGAATCATACTCGTAACTGAGCT  
GTTTCGATGATACGGTCTGCTTCCTCATT CAAA ATCCAACAGCATTTGGCAGATCC TTTCTC CAAA GCTCC  
TTCCGAATGCCATAGAGCACGAGGATCTTCTGGAGGGGTTCC TAAA CACCATCCG GAAA GAATAGCATCG  
AAA TTTTCTCCTCGAGGGCTTGTGAATAATCCGCCATATCTAACCCGAGTAAGCAACACTCGATACCCA  
CCTC TTTACATAACCGTAGCTACATATTCGGCAATCGTTCGTGCTGTTACACT TTTACATAGTAGCATAA  
CCG GAAA CGGAAA GGC ACTACAAC TCCATCGATTAC TTTCTCACGAATACCATCTCCATCAGCATCGATC  
CAGCCCTCTTCTCTAA TTTACGTGCGGCTCTTCCGGAGAGTATTGCCATCCCTCTACATCTCTGTTGT  
ATGATGGAGAGCAGAGA GAAA AAGGCCACTCACAGAGACTCCACGACCATCCAAGCACTGCTCAATAAT  
GCGATCCCGATCGATCAACATATTCATGGCTTGTGCTACCGAACGATTGT TAAA GAAA AGA GAAA GACAA  
TTCCATCCGATGTAAGAATAGGACCGGTCTGATGAATTTTT TTTCTAAA ATTGCCTCTCCTCTAGCAGCTT  
GTTCTTATAAGCAGAGG TTTGCATGAAGCTCGCTAGATTATCGACATGGTTAGGAGG GAAA TACGCAAT  
ATCCACCTTCCAGC TTTGAAA TCTTGGAAAGAGAGAATCTGTACTATC TTTCATATAGATATAGCGCTTC  
TCCACAAGAGCCG CAAA CGGATTATGATAATTAGGATTACGAAC TAAA GTAAT TTTCTCATCATCCATCC  
CTG CAAA TCGGAATGCTCCACAGCTCACTATGTAATTATACGCCAATGTGAA GAAA AGTTTTG CGCCCA  
TACCGAATCT TTTGCGATACGTATCGGGATCAGAATCTTCTGGAACGATCTTCTCTCCA TTTGCGAAA TAC  
TGATACAC GAAA CAAGGTAACGGTTGGAGTGCCAATGTATTTCG GAAA GCAGAA TAAAGCACTTT TTTCT  
CTTCTCTCCCTGTTTACGTACAGTATGAGCTCTCCAACGAACGATTAAT TTTCAAA TCGT TTTCTAC  
CCGAACC GAAA CCATATCCT CAAA ATAAGATCTCATAGCCACTGCACGCA TTTCTGCAACATAGGGATTC

ATGACTACATCGTAATAGAACTTCACATCATGAGCGGTGACAGGATGTGGTCTTAAGAAGGTGTCTGCTA  
AAGTTATATTTTAA GGAACAGCGTAGGATCTATCGGCTCC CAAA ACATATTAGGACG CAAATAAA TATG  
AAA TTC TTTATCCCAGACCCATCCTCTACATAATGCTCTTCTATC TTTAAGGC TAAA CTAGGCG CAAAC  
TCCTCGTATTTA CCAACATGCTCAACAGC CAAA TTAGGAACGCACAATTCATAAAA ATCGAACGATATTA  
CAAA GCCAT TAAA CGGACTTAGGTATCAGGCCTTCTACTTGAGCTGTACG CAAA ATACC TTTC GGAAC  
AAA ACC TTC TTTA ACAACGAAGGGACCACTT TTTC AACATAAGGGTCTTCGCATAA TAAA TTAGGGAAC  
GCAGGATCTCCGCAATCCTTCAATACACTGATCTCTGGA GAAA CA GAAA AATCTATAGACTGGACCCAAT  
TTT TTTG CTGATGCGAGATCCGGACTAACTCAAGAACATCTTCATG TAAAGCCTTGAGTTCTCT TTTG AT  
CGA TTTC ACATCTT TTTC AAGTAGATCTGAAGACCAATACAACAGGAATAAGGACAGAACCAGTACTGTT  
CGTATAAT TTTA TCTATCATGCGTTGTCTCCTCTATTCGTT GAAA ACGCAC CAAA AAGTCTCAAGACAGG  
TCTAGAATACTCTTATCAATCTGGGT TTTGAAT TCTAGTAACTAGCGAATTATAG CAAA AGAAA AGCTT T  
TTCTCTTA CAAA CAAGATGATCGACTTACT GAAA GAAA AT TTTCAAAA AATATTTA GGAAGGAGCTGGT  
ATAGAGAATCT TTTA GAAAAAAAAGAGAGTT GAAA AT TCAACTCTCT TTTAGAAAA AACTATCGAATA  
GGATCTCTAG TTTC TTCTCCACCTTCTTCCCCTTCGCAAGCTAGG GAAA CAAC TAAA GAAGAAA CTTCTT  
TTTC TTCTTCAGTCTCATCAGCG TAAA CGGAACCAGCAGCGGCAGCAGAAGTTAACATTGCGAG TAAA AG  
TAATTT TTTC ATTGGCGTCTCCT TTTA ATAGGTAGA TTTC ACGAATAATCCGAAC TTCTTACT TTCTCTC  
CTC GAAAAAATGCTATA GAAA AAGATAAGCGGATCTAAGCTGTGTAAGCTCGGC CAAAC TTTAAGAA  
AATCAGAAA ATATAGGCAAGGAAA AGGATCG TTTC TGGATAGTTGTGATCAGAATAGATCCTTGCTAGC  
GCAAAAC TAAA AACTG TTTC AAGTGGCGATAA GAAA GTTGA TAAA GGGATGGAACCC TTTG ACTATCTAA  
GGCATAATCGATACGCGGAATCCCATGCAATGATTGTGTGGGATAG GAAAAACTAGCCGTATTCCCAAC  
ACAAA AGAATACCGATAAGTCTCCTGAA CAAA ATGCTGACTTACTACATCACT TTTC CCCAATG GAAAGA  
AAAAGC TTTC TACTGGGC TTTG AATGGCATTCTCCAA TAAA AT TTTAGATAA TAAA ATCTCTGTGTCTAG  
ATAAGGAGGAGCATA TTTA AGAT TTTC TAATCG CAAA CCCTGAAGAAG CAAA TCGCAC TAAA GGGCTTGCA  
GCCATATGACACAGCTCTCTTACTGAA CAAA AAGCTGATGATAC GAAA ATATTTTC GTCTCT GAAA AGCTA  
AAAAATCAGAGGGAGCAATTCGCACATCAATGGGAAGATCCTCTCCTTTC TAAA TCAGCCACATATCTCCA  
GGCAACTCCAATAACTGCAGGTATCTGCAAGTCTGAAGAAGAG GAAAGACATGTGTGTAGAAA TCAACA  
GAAGCGTGATCGAATGTAAGCATAAGGGCCTT TTTC TTAGGGAGAGGGTCTCCAGGCAACAT GAAA GAAT  
AGTGTGCTTAAAGAGAGGA CAAA AGGCTCACAAA CGA TTTGAATAAGTGAGGAAA CTTAGAAA AAGAAAC  
CTGTGATAAGCTAAGACTCGAAGCATGGATCAACTGAGGGAAATG CAAA AAGGATCTTCTGGGTAAA TCA  
CTATCTGGCCT GAAA TAATAGTAGGGGTACGCTCTT TTTC TTCAAGAACTCGCTCTGCTGTTTC CATAGA  
ACAGA TTTC CAGAAA TGGGGGAGGAGCTATGCATAG CAAA AATTC CAAATCAATAAA GGGCCCTCAGACTG  
CTGTAACG TTTA GATATAGTC CAAA CCCCCTCT TTTATAAAA ATTGCTCGTAATCTT CAAATCCTGG CAAAG  
CCTTCAATCCGTTAACTC TAAAGAAA AATCCTGATT CAAAGATTC TTTAACCTCAATCATGCGCAATAA  
CGTTA GAAA ACGTAGCATAGGGAAA TCCTTCGAAGAG GAAATAGAC GAAAGAAGTTCTCTAGACTTATCT  
AAA ACCTCTTGATACTGCTTGGTTGCATGCGCATCAGCTAT TTTC CTTCAATAGAATATGTTGAGGAGAAG  
GTAGCTG CAAA TCGTTCATGTTGATAGGCAAGCCCTGAATAATACGCTCCTCG TAAA GGGTCATTGTG  
TATAT GAAA ACATGAAGC TAAA AATCCAGCGTAC GAAA CAGCCTC TTTACCACCTCTTCGATACGCTTGT  
TCAAGCATAGGCATAGCCGTCTCTGGAGG GAAA ATTCCTCGGAATAAGCAGCTTCAACTGACCCG CAAA  
GCAACACCAAGCTATTCTGACGCTCAACACGATAGGT TTTC ACATTAACAACATATCTTCCCT GAAAGAAA  
AATAGA TAAA ACAACAAGG CAAA AGAGAACAACCGAGTAAGAA GAAA TCTTT TTTC G CAAA ATCTCGAAC  
ATGGTCTTACGCACCCTA TAAA AG CAAA CAGTCTTCACCAGTTC CAATGCATTAGAAA ACCCTGAGACA  
CCAGTG TAAA ACCGTCTCTATAGGTTGGTTATCTTCTCGA TAAA TATCTTGACTTGGTTCT TTTA CACAA  
GAAGAAC TTTAGATACAGATAGTGTACAATGGTTGTTAT TTTG GATGTAGGCCTT TTTAAGAAGGATCTT  
CTCTG TTTAAAAAGACGATTCC TAAA GCTTGC TTTC TCGTTATAAAA CAAGAAA CCACCCTAGATCC TTTG  
TACATCGAAC GAAA GAAACTCTATA CAAACTTTTATTTCCCT TTCTTTTATA TTTAAGAGTTTTTTTTTA  
CTAATGAATAGTCTTCTCCGACTACAGAGA GAAA TGAGTCTCCTATTTCCA TAAA AAAAAAATACCAAGGTA  
AAATATCTCTTAT TTTA CTCCCATCTACAGAGGATCCT TTTATTTTC AGGATGGAT TTTATGTCTGTTGTC  
CCACAGAGTCTTGTTCATCTCCTA CAAA CTCTATAGGAGGCTTAGCGTCTCTTGGCGAGCCTCTCTAT  
CCCCTCGCGCTCGATACGAAGTAGGGAGCCT TTTA GCTATTGTTGGACTCATTCTGACCTTAATAGGGGC  
TGCGAGCATTACGCAGTGT TTTA CAATCTGTGGCTACCCCCGCTATACT TTTC CC TTTG TTCAGC TTTC  
TCTATTGCCCC TTTG GCGACAGCTATTT TTTC TGTGATTGTGGGACTCGCTCTCCTCATAGGAGGGATCT  
TTCTTCTCCCTGTACAGCAAGAAA CGCCGCACTCTTCTCTTCGCTA TTTAGCTACTACCCCGTAGAACTT  
AATGAGTTT TTTA GA TTTC TTCAGGTCTACC TTTC TTAAGTTCG TAAA CCTGTAATCCCTTAGCATTC

ATTCCTGCTGAAAATAGAGAATCCCAGCTTCATTATTGTATTCGCGTCATGGGGTTTCAAATTC AAGA  
CAATCTCGTATTACGAA TTTCTTTC TTGGGCA TTTG TAGATCATGATAGCTATAGGCCAACTGTGTATG  
CACC CAAA CATTCCCTGGAGCGTATTCGTTAAGAATCTTGAATCTTCTGTAGCCCTATGCGCTGTTGCA  
AAAAACTTTTCTCTGAATATCCTCTCCATAACGTCTGGAGGAACCAATATTTCTGTAT CAAA ATCCGTGT  
ATTTCTCTGGGGTCTGCA TAAA GCCCGATAGTGATACGTAGGCATCTGCTAAG GAAA CGTGTGCACCCAA  
GTCTGTAGGAATTGCTTGGACAAC TAG TAAA TA CAAA TCAATTGC TTTCTG CAAA AGCATCTCTCG GAAA  
GAAA AATAATCCTTC CAAAA CAAA AACAGCTGAATTT TTTG ATAGAGTCGTAGGGAGGCACTAT TTTCA  
ATAAA TTA CAAA AAA CAAA AACTCTTGAT TTTG CATTACCAGAGATAGCTGTGTA ACTGCTGCAGCGAT  
CTCTGGGTGTTCCATCATGTT TTTCTTTTAAA AATTACCTGAGCTTGATGAA CAAAGTCCGCAAGG  
AG TTTAT CAAA GAATTC CGT TTTCTTAGATAGAATGTAGAGCCGAATGACT TAAA CATATAAA TATTGTAA  
GAA CAAA ACAGGCCAGG CAGAAGGCTGGTAGAAGAGT TTTCCAGA GAAA GAAA AAAG TAAAGAAA GAT  
TCCCAGCTCTGCGACCAT TAAA GTCATCCC TAAA GCAACCAA TAAA GTCTGCTTGAGCAGATAGCGCAAT  
AAGAGTCGATGCGT TTTCTTACA TAAA GACTCTAATATGGACTGAGCG TTTCTGTGA TTTCTATA GAAA TCC  
CGCACTCCTAA TTTGCCAGGCGTCCCAGA ACTAGC TTTCCATCTCT TTTCTGGAGAGGCACTATTAAG  
GAATA TTTCTTTAAGACTATATTCTTAGAGACAATACTGAACAGGCAT TTTCTTGAGAAGTT CAAA AGCG  
TATCCCCTAAGGCATTAGAAGCGGCTC TAAA GAAG TTTCTGTGGGAACTTCTGACTATTGCTGCTA  
GAGAGGATACCCATCTAGAAGAAGCATTGATAGCTGGGATACGAACCACACGATACTCCTTTTGCAGCAA  
TATAGGCACATACAGATGATCTA TTTCCATATAGAGTCTCAATATGATCC GAAACAAA TC CAAA AGGACA  
ATCACAATGTAGCG TTTCTTGGTACG CAAA GACTGACAGACCTCTTGAGTAGAGGGATCTAGCCAT TTTCT  
CAATCC CAAA CTTAGATT GAAA AGCAA TTTCTCCCCTCTAATTCACCTCGTAATGCTTTC GAAA GAAGCCTG  
ACATTGCTGAGCATAAGGATCTCC TAAACGAATATGCC TTTGAGGTAATCCGTGTACAGAAAA GAAA  
TAACAATCCTCCACAGCGATCTGCTGAGCGGT TAAA CAGTCTCGAATATGCTGTTGCATACACGAGACAA  
ACTGAGGATGCACTC CAAACTGCGTAATCCAAGAAA TGGGTT TTTCTGGAAGATGTTGTAAGAAA AATCG  
AATTATACTCCCTGTTACTGCGAAGGTGTAATGTGGGAATAATGGAATCCCAACTATGCTTCCCTGGCTT  
TCTTGTAAATGCCTGTAAGG TTTCCGGTGAGTCTCTGG TAAA TATCTAT GAAA AGGAATAACTGAAGCTT  
GCAATCTTGAGAGAGGT TTTGAGCTAGTCTCTCTGTATCTT GAAA AATAGGAGATCCCCCTCC TAAATA  
AGCGTATTGTGCGCTACATGAGGAGCTCGACGCTTAGCAATATAA GAAAACAATGGCCTATGCAACACG  
GAAGGAATCATTCCCTCCTGTAACATCTCGATCTGTCAATAGAGCTTGTAGAAA GCTGACAATCTCCTGAG  
AAGTCTTGGACCTC CAAA ATTGGCTAG TAAA TATGTTACCACAGTCTCT TTTAAA TTCCTTGTCTAAGG  
AAGCCGGGATTGCAT TTTAATGGCT TTTGTATCTTCTGATCGACGAAT TTTG CCAATCCTGCAT TAAAT  
CCTTCCAATAGGGAATCCGATCCTCCTCCTCGTAACACAAC TAAA CG CAAACCTCCTCATTAGAGGTT  
CTGAAGCGATTGCG CAAA CGTCC TTTA TAAGCCG TTTCTACT TAAA GCAGTTGCCTCTATTACAGGCACCAA  
TAACGCATCATAACGCTGAGTAGA CAAAGCTTCTAAGGCTACAGGAATATGCTGATAGGAATCGATCACA  
GCATTTGGGAACATTCTGTGCAATAAGAACGGATGAATCGAAT TTTA TATACTCCGATCAACT TTTCTTCTA  
AATCCTGGAGAGAATGATACGGAGAAT TTTCTAAA ACAACAAGCACAGGCCCGGTTAA TAAAACGGGATC  
TGAAA ACTGGTACCGAGCTAACAT TTTCTATTGAAGGAGAGGCTGAAG TAAA GGCTCCGCTAGTCTTCTTA  
TCATCTAAA TTTCT CAAA AAGATGAACCAATCTTGGTTCACTATAGAGATATTCAACCCTTCTTGTAAAT  
TAATCTCAGAAA TAAA TCATTCA CAAA GCGGTTAATTCCTGATGTA TAAATAC CAAA TTGTTGAGGGAA  
CCAAGTAGCATCCCTCCGACGAGAACCCTTTG TTTCTCTCTGGAACATCCGTAG CAAAACGCTACAATA  
ACCAAGAC TAAA AAGCTTAATGGACG CAAATACT TAAATTTCACTCTAACCTCAGAGATCAGACTAGATC  
CCCGAATCATATTCAAGA GAAA AAT TTTATCCACCCACTATGATTACGCTTTG CTTATGTAGAATGAGC  
CGAGTTCTCTTGCTGAATGTATTCT GAAAGAAA AGTCCCCCAGAT TTTCTACG TTTCCGAAGCTCTAAT  
CCCTGTACTAGAATCTCTTGCGGAGATGCGTTCTC TAAA AAGAGAATCCCATCCGGTCTAATAGGCTTT  
GTTGTACAACGTACGA TAAAACCTCTTGAAGAAA CGCGTTCTC CAAA GCATAAGGAGGATCTATA TAAAC  
GATAT CAAA AGAACGATTCTGTTA CCTAAGCGTAGCAACGCTGAACGAACGCTTTGCTTCAGGATATGA  
ACAGG CAAA TTGCTATCTAACAAA GCAAGATTAGCTCGAAT TAAA CGCACGGCTTCAACAGAGGAATCTA  
CAAA GTAGCAGATCTGCGCCTCTACTAATAGCTT CAAATCCCATAGATCCAGATCCTG CAAA CAAA TC  
CAAA AACCGTGCGCAACTATATGATTGGCACA AAA TAT TAAA AACAGCCTCCTTCACCACACCACAAGTA  
GGACGAACAGAGGGATTA GAAA AAGTC TTTAAA GACTTCCC TTTG AA TTTA CCA GAAA GAAT TTTCAACT  
GACAACCTGAGGAA TAAA ATCAACGTAATCGGCAGCCACGAGAGTGTACTCAATTCCTCGGATATTTCCA  
AATCCAGG GAAA GGTGCGGCACCTTATGTAAA TGCC CAAACAAA CAACGAGAGACGCGGCCATCCATCT  
CTAA CAAA TTAGAAA CTCGCCAGGCGTCCCCTCATTACTAACCGGAGGATAGTGCGTCATAAC CAAAAC  
ATCTTCTACAGAAGCGGGCAACTC TTTCCAGAGCTCGCTC TAAA CGACCATATTCTCGAAG GAAAAT TTTA

TCATCTTGCTCAGT TAAA ACTCTCTGAGGACCATCATGTTGCG TTTC CCAATGGAGG CAAATGTCAGAAG  
AATCCCA TAAACGAACCCCAACAATTGCCTGATGAGCATTAAAGCAACACGTATCCT TTGAAA GATAATG  
AAGAG TTTC TGG CAAA AC GTTTCGCAAG TTTC GCAGAAGAAGCTGAACTCCAATAATCATGATCCCACGG  
ATCATGTA TTGATCCCGGGGAGAGCTCC TAAAAAAC GAAAATCAACCTGAGCTTCTTC TAAA CGCATTG  
CCCAG GAAATATCTCCGGGCAGA CAAA CAATATCATCCGATGAGACGATATCTCTCCAGTGCT TTTC AAT  
TT TTG GTGATAACCCACCCAAGGCTCAC CAAA AACCTCCATAGT TTTC TCGGGGACTCCTAAGGATAGA  
TG TAGATCTGCAAGGG CAAAAATACGCAT GAAA CCTCTTGCTTGATAGAAGAATCAGCTCTTTA TTG  
CAACCACT TTTA CC TTG TCAACAGCTC GAAA GAAA AATCCACTCTC TAAA ATACGTAATTATCTGGGA  
TTG CGTTCCTCTAGGAACGATGATAATACCATCTCGAACAATAA TTTC CCATCTGGAGAATCATAATC  
CTTATGCCCTGCAGATTCTG TAAA CGCACACCG TTTC CTATACAGCAGT TTTC ATCAATAATGGT TTTA  
TGAA TTTC ACAGTT TTTC CCAATCCC TAAAGG GAAA GACTCAGAACCATAACGAATCGCTTCCCATCATGA  
TAGAACGGT CAAA CACAGATCCTTGCCCTATTACCCCTCGAACTCCAACGACACTATTCGAGACCTGGCC  
AGACTCAATCATAGCTCCTTCACACAG TAAAGAACTC GAAA ATTCTCGAATCT GAAA TAATTGCTCCAGGA  
AGATGATTATTTT TACATAGATTATCCCCCGTCATCATAACAAT TAAACCCACGAATATTGTGCGAAG  
GCCGTTGAGT CAAA GCCATATTAGCTTCGTAATAAGATTCTATAGTCCCAGATATCTGTCCAATAACCGTC  
GTACAGATATGCAACAGT TTTC CCGCGATGCAT TTG TCTATGAATCAGCTC TTTC CAAAATCATCTCCA  
G TTTC TTCTAGAAGCAATTGGAAGAGACAATC TTAC G GAAA AGA TAAATCCCCATAGATCCTA GAAAAT  
TCCCCTGCTGAGGATCGAGAC CAAA TTT TTTC ATCGCCGTGTACTTAGAC GAAAATG TTTC AAAATCTC  
TTCAC TTGAGG TTTC TCATAGAAA TCAATCAG TTTC GACTCATCGTCTAC TTTC AACACTCCGAATCGT  
GAAA CATCTTTA TCTGATACAGGCTGAGAAGCGATCACCATATCCGCCTGTGCATCGATAGCATAATCTA  
CTATCGAGCGAAAATCCATATTGTATAGTTGGTCACCTGACAAGAT TAAAAAATACTCCACACGAGAATC  
TTGTAGA TAAAGAAAGAT TTG GCGAATTGCATCAGCTGTTCCCTGATAC CAAA CTTGACTTCCATCTCGT  
CTTC CAGGGACCAAGAGATGAATCTGATCCTGCATGACTCCATGG TAAAAATACGTCT TAAA TAAGTGT  
GCTG TAAAGTATAGTAAGGTATTGCCGATAA CAAA AATCTTG GAAA ATTCTGAGG CAAA GGCATGAGA  
TATAGGCACATCAATAAGCTTGTATCTTCCCC CAAA AGATACTGTTGGCTTACAACGCCAACAAGTTAAC  
GGAGATAATCG TTTC CCTCTCCTCCGATAAGACAATAACTCCTACGTTATCTCGATAGAAA TCGGATC  
GT TTTC GATTGATCTGCTCTTC TTTC GTCCGTCTACCAGCCATCTGTCCCGCCACCA TAAAAAATAAT  
TTAAAAA TAAATTTAT TAAAAAAGCCAGACAAACAAA ACTGTAATTATTGCATGAATAA TAAATCGAT TTT  
ATTTT TAGATG TTGAAAAA TAAA AATTATCTAAT TTGACAAA AAACGGACCCATACCCTTTA TAGAGA  
TAAGAACTCTTTTC TGACTCGCCTATGCTATTCCACATC TTG TTGGCATACTTCCAAGAGCAGATTC  
TTCACCTTGAACCTCCTCTGCGGATCA TTTC TTTTATGGGAAA AGATTCTTAGGAA TTACAGT GAAAC  
TAAAGAAAGCTTTTC ACTCAGATGAAGTAGCGGAACT TTG GAAACAGCTCTACTACAAT TAAAGAGGGTG  
GCC TTTC GGAATATT CAAACCTATCAAGCCACCCCGATCATCATACCT GAAA TCTGATCGGATAAA GAC  
GATCTTAATCCTTCAAGGATAACAGGAATTCTGTATTGCTAT TTG TCTTTTCAAACGGCCTAGCAGTA  
AATGCATAGCATCTATTGCTGT TAAA CCAGCTATAGCTTGTGCGGAACAACCGAAC TTTC TCAAGCTCTCC  
AGGGTGGTACAACAATCTTCT TTTC GTGTTCCACTCTAAT CAAA TCGATAGCCGGATAGATTCTGCGA  
TCA GAAA GATGGCGGTCAAGAACCAACTCCATATTCCAGTTCC TTG AATTCTC CAAA GATCACTTCGT  
CCATCTTGATCCTGTATCAATCAACGCTGTGGCCAAGATAGTTAACGATCCTCCGCCTTCAATA TTTC T  
AGCTGCACCGAA GAAA CGCTTAGG TTTA TGTAACGCGCTAGCGTCTACTCCCCAGTGAGGATCTTCCCT  
GAATGCGGCTGCACAGTATTGTATGCACGAGCTAGACGCGTAATCGAATCTAATAGAATCACAACATCCT  
TACCGTGTTCGAC CAAA CGTCTTGCC TTTC GATCACCATTTC AGTAACCTGAATGTGTGATCCGGTTG  
TTCAT CAAATGTGCGAGGCGACGACCTCCCCCTCGAACCTGACGAATCATATCCGTCACCTCTTCAGGACGC  
TCATCAATTAG CAAA ACAATCAGCTCTGCGTCAGGATTATTCACAGCAATAGCATGTGCAATGC TTG CA  
AGATTACCGTCTTACCTGAGCGAGGAGGCGCAACGATCAATCCTCGTTGTCCCTTACCGATTGGAGCTGT  
TAAA TCTAATACTCGCTCTGT TAAA TTCTCT TTTC CCTATCTCCATGATCAATCGTTTATTAGGATGAAGA  
GGCGTTAGGTTCTCGAA TAAA ACACGCTCT TTG CCTTATCAGGCGTTGAGCCATTAATCTTATCCACTT  
TCAACAGCG CAAA ATA TTTC TCTT TTTC CTTAGGAGAACGGATCGTCCCAACGATGGTATCTCCTTT TT  
CAAA TC GAAA CGACGGATCTGCGCAGGA GAAA CATAGATATCTTCTGCGGAAGGAAGATAGTTGTAAGTG  
GGAGACCTAAGAAA TC CAAA ACCATCCGGGAGAACCCTCCAGGACACCTTCTCCAATCAAGAATTCATCAG  
GACGTT CAGATTTA GCCTTAACGA TTTC GAACACTACCTGCGA TTTC GTCAGAGAACCACATTC TTAAC  
TCCATATTGCCGAGC TAAA ACATTCAGCTCATTAATGCCATGCGCTGTAG TTTA GCAATCTTCGTAAC  
GCTACTGGTTGCGAGG TTTC TTTC TCTTCTGTAGCAACAGCACTGTCTTCACTAACTTCTTT TTTC CAACG  
ATAAAA GGGCCCTCGCGCCTCTTGTGCTCC TTTA CCT TTG TAAGACCTCGGCTGGACTCTCTTC TTTC AT

ATTGTTCCCTTTAAA GCCTTAAA ACATTGTTTAACTTTGCGACGAAA TTCTTC TTTC GTTCCATTATTCT  
CTATGACCACATCCGCTCGCAGGATTTTTC TTC TAAAGAA GAAA AGCGTGCACACCGAAGATC GAAACT  
GGTGTCCGAACCTCCAGTTTTT TTAAGAAAACGCTC TTTGCGTATACCCGTATCTGCA GAAAT TAAAATA  
ACCTGAT CAAACCAATCCGCATACTGAATCTCATAACAAGAG GAAA TTCCACAA TAAACAGAGGATACT  
TTTG TTCCTGAACCACGTGCGCATATTTTTC CTCAA CAAAACGACACACTTCCGGATG CAAA ATCTCTTC  
TAAA GACAGCAA TAAATCCCGGTTAC CAAAAACTT TTT CAGCAATGGCC TTTC TACTAAGAGTATTCTCT  
ATGATTATCTCTGGACC CAAAAGATCAATTATACGTTGACCCACTGAGGTATAAGGAACAAG GAAA CTAT  
GAGAAA CTTTATCAGCACTAATTACATAAGCTCC CAAATCTT CAAA AACCTGACACGCCTCAGT TTTC CC  
TGAAGAGGGATCTCCTGTAACA GAAA TCTTCAA TAAATCTAGCATTCGCCCCAATTT TTTC CAATTAAGA  
CATTACAAC TAAAGGAACAGACAGCTCCATTGCAGACTCCAT TTTC TCTTGAAC TAGACTTCTCATCTC  
TTCCAATTCTTCTGCAGGGACTT CAAA TAATAATTCGTATGAA TTTG CAATAA TAAACGACTT TTTAAT  
CCCCTCGACCTCA TTTC GTCTGAGATATTCAACATAGCCAAC TTAATTA ACTCTGCAGCACTCCCTTGTA  
TACGCGTAT TTTA CAGCAAGTCTCCAGAAGCAGCAGACTCCAGGAGAGCTCTCCCAATCGCTCAGAAT  
ACGCTCTCTCCCAGCATTGTGGTTAC TTTC TGATTCTTACTAGCTTGCTCTATCGTCTGTGTAA TAAAT  
TCTGCTGCTAGAGGATAACGCG CAAA ATAGGCATCCATTAATCCCTGAGCCTCAC TTACGCTAATC TTTA  
AAATTT TTTGATAATCCATACGCCTGCTGTCCATACACTAAGC CAAA ATTCACTGC TTTAGCCTGATAACG  
CTCCTGCTTCGTAACCTGCTC CAAA GGAACATTGAACACTTGCGAAGCGGTGAATGCATGAATATCCTCG  
CCAGAAT TAAAAGCTCTCTTCAACGCTCTCATCTGACTAAGGTGGGCAAG GAAA CCGTAACTCAATCTGAG  
AATAATCAGCAGC TAAA AATAATCATTGTCTTT TTTA ACTC GAAA AGCCTCTCG CAAA GATCTCCCTCT  
TTT CAGAACGCACAGGAATAT TTTG AAGATTAGGATCCTGACAGGATAATCTGCCTGTTACCGTTCCTACT  
TGGT TAAAAGTTGGATGAATTCGTTGCGTTCCCGCATTTGATCTGCTTAGG CAAA GCTCGAACATATGTAG  
ACAACAT TTTC TCTGTAGCACGGAACAT CAAA ATCTTGGGAATAATCTCGTGACGGTCTTCTAGAGCTTC  
CAGAACCTCTGCC TTTG TAGATTTG GCTTTA TCCACAGGCTCTATTCC CAAA CGTGATA CAAA ATATCT  
GATAACTGCTTAGGAGAT TTTA ATAT TAAATTCACAGCCAGT TAAA TCG TAAATTT C CTGAGAACATCTT  
CGAGCTC TTTG GTTAGATCTCTATC CAAA ACAGCTAATCCTTGACTATCCAAGGGCATTCCCACGATT  
CATGGCGAATAACACGGCTTCCAAGGGTGTCAACCGTCT CAAA AATATCT TTTAGCCCCCT TTTC TTCT  
AACTTCA CAAATAAA TAATTT TTTG ATCGCTAGTAAT TTTG AAG CAAA CATTCC GAAA ATTTGCGGGGAT  
CACGCGGTAGGCTCTGTACAGGAAGCAGCCGGCCCCCATTCCCTTAGAAAAAACACTGCTTCTTGAAT  
ATGTCCGGATTCCATTAA CAAA GTCTG GAAAGAAA TT TTTG CTCCGCCACTCAC TAAATGCTCTGCTAGA  
ACC AAA TCTGCTGTTACATGAACATCGATCCAGAA TTTCT TAAA GCGTGATTATCGCG TTTA GAGCGGT  
ATC CAAA AAATTGAGTCG TTTA TCTG CAAAAAAGTC TTTAAG CAAA GCAATCTCTTGTACACCAGATAC  
CTCTATA TAAA ATACCTGGTTGGCCCCAGCTAAGGCTACGCCGTGTAGCTG CAAA GAAGGGAGATGCTCC  
CCAGTATAAGCCGCACAATACCCAAC TCTCCCCCTTCAACTGTTT TAAA ACAGTCTT CAAA GTTACCG  
GATCTGTACAGTCTGTACC GCAATGGAAC TCGTAGCAG TTTC CGAATGCTTTA CCAGAGCCT TAAA TCC  
ATGCTG CAAATAAA AGGTATTCAACTGCGCTGAATCTATAGCTTGCGGAGAAAACG CAAACTCCTCAGTC  
GTCAACGGGAACCGGAGATCCATGTGTAACGTGGCAAGACG TTTA CT CAAAAGCAACGCTCTC TTTC TGAT  
CTTCTATCAT TTTG TTTA GT TTTG CCAGATAAA CGTTCGGTATTAGCAACTA ACTCCTCTACTGATT GAAA  
CTCCTTCAATAGAGCTTGAGCCTT TTTG GGACCACAACCAGAAA CGCCAGGAATATTATCGGAAGAATCT  
CCCCTAACGCCAAGTAATCTGCAATCTGCTCCGGAGGCACTCCGAACTGCAATAGTACTTTCGTTATATT  
GGA TTTC CTGTTT TTTC CAAGGAT TAAA TACGGAGACACGGCTGCTCACCAGTTGCAATAAGTCTTATC  
GGCAGTG CAAATACACACTT CAAA ACCATCTGCAACCGCTTT TTTA GTGATACTAGCAATCACATCATCA  
GCCTCTACACCCT TTTC TTCCAGGCACGAGATACCAAGTAATTCACAATATTGCTTCAC TAAA CGAATTT  
GCTCTGGAAGATCCTCTAACTGACGATCACGGTTACT TTTA TAGTCGGCATAAA GCTCTTGACGGCTCTG  
CTTATTATTGGGACCAT CAAATACAGCAACCACGTATTCGGGAGAGAGGTC TTTG ATCAACTTATC TAAA  
GAGCGAAT GAAA CCGAATACCGCTTGCGTACT TTTC TCCATTTG GACCTCGCATCTCAGGAAGAG CAAA AT  
ATGCCC GAAAA CAAA TCCT GAAA CATC TAAA CAAA AAGTTT TTTC ATATGCACCGATCCAGCCTCAAC  
CCATGTACCA CAAA GATT TTTG TTGCTGATCAGG TAAA GCCGTCACTTGGAG TTTC CCTGTTACAAGCGG  
GCTATTACTTAGATAGCTAGAAA AACGT TTTAAA AAATGGCCAGAACCCAATGACTCGATAATTG  
TC TTTG ATACCACAGGCTTACGCCAGTTCTTCTAAA GCTTGTCTTGAG TTTG ATTGATCGCATCCACCA  
ACCTTCTTCCAGAGCTTGCTTCGCAA TAAATACACGGGCTCC CAAA ACCTTTCGTTAGTTTTTC CTTAGA  
CAGCTTCGAACGATA TTTA ACAACATGATCCA CAAA CTGTTTCATA GAAA GCATCCACTATCCCCCTGGCGC  
TCGGCGTACTCTTCTCTGTCCATGAA GAAAAAGGA TTTAACGGCGC TTTG TCATCTCCCGCTGTAAGAA  
TAGCAG TTTC CACGCCATGTGTTGTAAGCCTTC TTTAACAT TAAA ATATGGGCCCGAACGTACTCCTAT



TGAACCAATCAGAGA ACTCGAAGTGGTTCCAATTTTATCGGCAATACAAGCAACATAATATCCTCCGGAA  
GCACAGAGTCCAGATA CAAAAGACGTGGACAGGGATTC CCCACTGTTTC TTCCA GAAA GAGAGTGTTCGC  
ACATCCGATCAA TTTCAAAAACCTCACCACCAGGACAATCTATTTTGACTAAGATCCCTTTTA CTCTCC  
TTTG TAAGGAGCTTCA TTTAAAAGGCTG TAAAAGCGGATTG TAAACGC TTTGCAGCGCCACTGCTAGCGATA  
ATAGCATCGTTAATATCAATCACTGCAATAATGGGAGCAGT TTTCCCAAGCTCTTGAACAACCTCTTGAG  
CGTTGGG GAAAATTGA CAAACAAA ACTCCGTCTCCCGCCCAAGAACAGAGGCCGATAGGA CAAA AATGAA  
TCCGGCAGCTCCTATCACACCT TAAAAA CAAA CCGCAGGCGGA TAAA AAACCTTTTA TAAAAATC GAAAA  
AAATTCCTCATG CAAA CCCTAATAAAA TCTATTAATCGCT TTTAGCATTAGAAACAAA ACGGTAC TAAAAC  
AGGGGGATTAT TAAAAAGAATT TTTAAATAAAAAAT TAAAAGACCTGGAATACTATACTCCAGGCTTT TTT  
CTTCTCAAGACTA TAAA GTTGTTCAGGTTCTTCTCGAGACTCAGCATCTAC TAAA GAAGAAGCCTCTCG  
CTCTTCTG TAAA ACATCTTCTCAGAAGCATTGACTCTAACAAGAGTCTCGGCTTTGGCTGTGTACTCT  
CTACCTAACCAAGCGATCA CAAA GATCCAACCTCC TAAAGCCAGCAACAACAATCGTAATCGCA TTTA  
AGCTAGCTGCAACGGACGAGAAGATGATCAGCAGTCTTGG TAAAC TAAAGAGCCCCCTGACTTCCCTAC  
TCTGGAGATCACCCCATCAATAGCCGCCTTACCCTAATTCTTCTCATCATCTTC CAAAGGAA TAAA CGCC  
ATCTCCTTGGTTTG ATC GAAA TAGGTGAACTTAATTGCTCTCGAGAAGACGTTCTGAACACCTCCTAACC  
AAGCAGTAAGA ACTAGCGGAGAGATCCCTAAGATCCCGC CAAAAATCATAGCATCCCT TTTA CAGCATA  
GATAGCGC CAAA GAACAAGGCTCCTGTAATCAATATGGT TAAAGGGGGTACCAAGGCGCAACAGTCCAT  
CCCCAACGGCGAATAG TTTGTCCAGCAGC GAAAATCCCTGCCAAA GCTGAGACGATTCTGTGAGCGTGC  
TAATCCTACTCATATAAGAAT TAAA TTCTACTCGAGAAGCAT TAAA TCCGACAGACTTGGTC TTTCCAAAC  
GACTT CAAA AAGGTGAATGAC TAAA TTGTAAGAGAGTACGACGACGGCGATGCCTAATAGATAGCGGGAG  
CGGAGGAGAAGAGCGAAGAGACTT TTTGCTTTTG CCTTCGACCGCTT TTTCTC TTTCTTAAGCTGAGCGA  
CCGACA TTTCTGCTGCCAACCCCTCTTCTAACATTGACGTCTCATCCATCAAGCGATCTAACTTCTGATA  
TAGATAGAGGATTACTCCGCCGGCCAGCACGATAAGTAGAGTGATATTGAGCAACATCTCATGCCAAGGA  
TCTACGGCCATAGGGAAGGCAATTACAGGACTTCTACCGAGCCA CAAAGAAA CCTCTCCAG CAAA AACAG  
AAGAGAGG TTTAATCCAGTATTAATAAGAGCG TAAA ACCGCCCTGCTTCGCGAACACTCGTAATATGGTT  
GGCTACCCCC CAAA ACAGAGTAGA CAAA ACTACGGA ACTCCATAACTCAGACATCACATAATACAGGCTA  
TAGCTCCAATATTGAACCATCACTA CAAAACCTCTTCCCCTGGAGGTAAGATGACTGTAGT TTTGCCG  
CCAA TTTATTTA GATGCAGCGCATCTCCTATGGGA TAAATCACTGTGGCGAACACG CAAAAAAGCC TAA  
AAAACCGCCGACT TAAA GAGATAAAA CACGGTACCTCTTGAATAACGTGACTCATCCATCCATAGATCATG  
GTGACGATAACGGCCCCAGGGACAATCCCCAGACT TTTCAAGAAA GGTATGACTTCCGCCCTGCTCTAG  
ACCCGACT TAAAACAAGGGAGTC TTTCTGTGGTC TTTAATAAAGCGTAGTTAACACCTA CAAAAAAGC TAA  
AAGAATAAGGGTA TAAATTTA GAGAATTCTGACCTGTATATGGG GAAAAGATATCCCCTGAACCTC GAA  
AAGGAT TTTACCTCGGAAGACATACACTCCTTCTAA TTTAATAAAA TATTGAAGAC TTTGG GAAA AATTT  
TTGTGATGCGAGGAACCTCGCACTCTGTT GAAATTTGGGATAATTACTGGATGCTTGGCAATGCATAATT  
ACAAGATT TTTAT GAAA TCCAGGGA ACTTAGAATACCGCACTTGTCTG TAAAATTCAAGTCTTGTACT  
CCGCTCCTCT TTTCTTTGGGCACCTACTC CAAA CAGTGCCGCTATAATC CAAA ACTCTCTC TAAA AAG  
TAGAGAGCCCCGAGGATCACTAAGGGAGCTAAC CAAA GAACCTGGTATCTCCATCCCTATCGTCACCC CAA  
ATAAAA TAAAGAATTGAACA ACTG TAAAAAAC TTTCCAAAAGACAATGCTCTGTAATCATATCCCTTCCA  
TCCTCGAACCCAGGATAGATAGA ACCCGAAGAACAC TAAAAAATATCTCTA GAAA AAATCAGAGCGAGG  
TGCGTAAGCCCTAGAGAGT TTTCC CAAAATAGAACCCACACAGAT TAAAAAATAT TTTA TCTGTGG  
CAGGGTCAAGAATGGAGCCCAAGCGACTTGTGGCATGTAGCGTCTAGCCAGATAGCCATCTAGAATC  
GCTAACCATCGCAG CAAAGATAACCAACAACCTTGTATAATTCTCTCTTGGCA GAAA AGAAGGGCTAAC  
CACACCCTGGA CAAAGAAA GGAGATTACAGAATTGTCTCATAACGTTGATTTCGGAAGCTTGTCTT GAAA  
TTCTTAGCCTCCAGCGCAATGACACATATTAT GAAA CATAGACACTC CAAAAGCAAGCAGAGAG TTTAGC  
TATGTTCCCGCCA TTTCCCCAGCTTATCAA CAAA AAAACATT CAAACAAACAAA AATTTCCAGAAA ACAC  
AATG TAAAGAAA CG GAAA GAGAGGGATTGCAACCCCTCGGTACCC TTTAAGGGGTACGGTCTCTTAGCAGG  
GACGTACCTTCGACCACTCAGTCATC TTTCCAAT GAAA CAACCGGCC CAAAAGCTCCGAAGGGA TAAAT  
TTA CACGAGAGTTTTTT TTTGAAA AGCATAAGAGTCAGAATCCTTGCTTCC TAAA AAAGAAGTTGACTG  
TC TAAA AACCCCGTCTCTAACCAA GAAA ACGATATT TTTCTTCCCCCTCCC TTTCTCTTGGAGATATAT  
TCCCCTATACCCTAACCTGGCCGAGAGAGCTTCC TTTA CCAACCA TAAA AATAATCCTCTAACTATGGCG  
ACCCAGA CAAAAAACCCTAACCCACTCAACTCCTCTCTTCTAATTCTAAGGAATCT GAAA TGATTG  
TGCTGGGGTGTATGTTGACCAGTGTCAATCA TTTG AACCTTGCTGCCAACCTTCTTCCAGGAAGATGATTT  
CTACTTCTTAGAGCATCGTATTATT TTTCTGTGTGTGCAGGACGC TTTCAAGTCTGACCGCCCCATGGAT

CCCCATCTTACGGGAGAAGAACTCAAAACGCCGAGATCAACTCAATATCATTGGAGGCCCTCTTATCTAA  
TCACTCTCTCTGAAATTTGCAGGGACATCTGCCTATATTGAAGAATACGCAGAAAATATCCGCTC  
CAAAATC  
TATTCTAAGAAAAATGATTCAAGCGGC  
CAAAAGATATCGAAAAAGAAAGCCGCTGAAGAGCCACGTGACGTC  
ACTACCGCTTTGGATGATGCTCAAAACTTATTGTTTCGCATAAGCCAAACAACCTAAGTACCCCTATG  
TCCTTGTTCAGACAAACTCAAAAGGAGTTGCTTCTTC  
TAAAGA  
CAAAATCCTTCTACTCGCTTTA  
CAAGA  
ACGCCAAGAAGCTTTC  
CAAGCAAGTGCATGACTCAAGCTCTCTATGCTCTCAGGCTTCCCCTCAT  
TTC  
TTAGATCTAGATAGAATGATTAGTGGGTT  
CAGCCCCTCTAACTTGATCATTCTTGCTGCTCGTCCTG  
CTATGGG  
GAAAACTGCTTTAGCTCTTAACATTGTAGAGAATT  
TTTGT  
TTTG  
ATAGCCGGCTTCTGTAGG  
AATTT  
TTTC  
ATTAGAGATGACTGTAGACCAGTTAATCCATCGCATCATCTGCTCGGTTCCGAAGTAGAA  
GC  
TAAA  
AAAATTAGCGTGGGAGATA  
TTTCT  
TGGTAGAGAT  
TTTC  
AACGCGTGGTCTCTGTGGTAAGAGAGA  
TGGAAGAACATACTACTCATAGATGACTACCCGGGGTT  
GAAA  
ATCACAGATCTTCGAGCACGCGCAAG  
AAGAAT  
GAAAGAAA  
GCTACGATATCCAA  
TTTCT  
TAGTTATTGACTACCTACAATTAATCTCTAGCTCTGGG  
AACCTAAG  
GAAA  
TTCTGATTGCTG  
GAAA  
CCAAGAAA  
TTTCT  
GAAA  
TCTCCAGAATGCT  
TAAAAA  
TTTG  
GCTC  
GAGAACTCAATATTCCTATTCTCTGCCTCTCTCAATTATCTA  
GAAA  
AGTAGAAGACAGAGCTAATCACAG  
ACC  
TTTG  
ATGAGCGA  
TTTA  
AGAGAAA  
GTGGAAGCATTGAACAAGATGCTGAC  
CAAA  
TTATGTT  
TTTA  
CTT  
CGCCGCGAATATTATGATCCTAATGAT  
TAAACCTGGAACAGCAGAGTTGATTGTGGC  
TAAAA  
ACC  
GCCACG  
GCTCCATTGGATCTATAACAATTAGTT  
TTTG  
AAAA  
AAGACT  
TTTG  
CTCGATTCC  
GAAA  
TTATGCTGGCTGTGA  
GTTCCCTGGAT  
TAAA  
CAAG  
TTTA  
TTCC  
CAAAA  
AATTGACAGCCATTG  
TAAA  
CTTCTTCCCATCGCCTGGT  
GA  
AAGCCGGCGATACACTTTGAGAAAA  
AAAACCTATGAGGATCGGGTGTGCTCGATTCTCTAGGCATTAG  
CTGAGTCT  
TTTCAAA  
AGACTTACCAATTATTCTTGGC  
TAAA  
CCATTAAGAA  
GAAA  
ACCATGTCATCTGT  
TAA  
GAAA  
AAACGAAGACTTAAGATCGCCAAGCATAAGCGT  
TAAA  
AAAAGACGTCGAAGAGATCGGCA  
TAAA  
AATAGATAGTT  
TAAA  
TTG  
TTTG  
GGTTCATGTGGACG  
TTTCT  
CTGTTGATTACGATGTGATAGTCATTGGCG  
CAGGACATGCTGGTGTGAAGCTGCGTATTGTGCTGCTAAGATGGGAGCGTCTGTCTTGTCTTGACCT  
C  
AAATTTAGATACTATTG  
CAAA  
ACTCAGTTGTAATCCTGCTGTAGGAGGTATCGGTAAGGGACACATCGTC  
CGAGAAA  
TCGATGCTCTCGGTGGGATTATGGCT  
GAAA  
TTACTGATCTATCAGGAATTCATTCGAATCT  
TAAA  
TCAAACT  
TAAAGTCCC  
CGCAGTACGCGCTCCTCGCGCTCAAGTTGA  
CAAA  
CAGCTGTATCATATTCA  
TAT  
GAAACGCTTGT  
TAGAACAGGTTCTGGGCTGCATATCATGCAGGGAACAGCTGAGGCACT  
TTTAGAC  
AATGGC  
GAAAAAGT  
TTTAGGAGTCTCTA  
CAAA  
AGAAGGTTGGCCCTATCTAGG  
GAAA  
ACC  
GTTGT  
TTTGT  
CTTCTGGA  
ACTTTTA  
TGCAGGACTTATTCACATTGGAACCCAGA  
ACTTCTCTGGGGACGATTGGGCGA  
TGCAGCTTCT  
TTTAGGTC  
TTTCT  
TGAAGATTTTAAA  
ACGCTTAGGGTCCCATTAGGACG  
TTTG  
AAA  
ACAGGA  
ACTCCTGCTCGTCTGTTAGCCTCATCTATTGATT  
TTTCT  
TGTAAATGGAAGAGCAACCAGGTGATCATAACG  
TTTGT  
TTTCT  
GTTTCATC  
GAAACGAGATG  
TTTGT  
TCTTACATTGCCACAGG  
TTTCT  
TTGTCACATTACTCATA  
CACTGAT  
CAAA  
CAAA  
AGATCTTATAAC  
CAAAA  
AATCTGCATCGTCCGC  
TTTG  
TATGGAGGGCGAATCGAA  
GGAGTTGGGCCACGATATTGCCCTCTATTGAGGA  
TAAA  
ATCGT  
GAAATTTG  
CAGA  
TAAAGACCGCCACC  
ATATT  
TTTA  
TTGAGCCTGAAGGACTTAACACACAAGAAG  
TTTA  
TGTGAACGGTCTCTCTACATCGATGCC  
TTTCT  
GATGTGCAGTACGATATTATTCGCTCGG  
TTTCT  
TGGATTA  
GAAA  
ACGCGATCATCACTCGCCCTGCC  
TATGCCATAGAATATGATTATGTT  
CATGGGAACGTTATT  
TTTCT  
CTTCT  
TTTAGAATC  
CAAA  
CTAATCGAAG  
GACTCTTCTTGTGTGGG  
CAAA  
TCAATGGCACAACAGGATACGAAGAAGCGGCTGCACAAGGCTTGATTGC  
TGGAGTTAATGCCG  
TAAATAAA  
GTCTTACGCCGCTCCAT  
TTTG  
TTCCGAGCCGTCAAGAGTCTTATATT  
GGGGTCATGTTGGATGATCTCACTACCAAGTACTGGACGAGCCTTATCGCATGTTCCACAGTAGGGCAG  
AACATCG  
TTTA  
TTACTGCGGCAAGATAACGCAGGCATGAGACTCTCTCACTATGGGCACTCCTTAGGACT  
ACTGTCTAGCGAGCGCTATGCTATGTTCCAAGAA  
CAAAA  
AAGCTTGTATAGAACA  
GAAA  
AAGAACGGTTA  
TCTAAGAC  
TTTCT  
GAAA  
ATATGGTGATACGGTAGTCCCATTAACCAGAGTTCTATGTCGTCCCGAAG  
TTT  
CTTATCAACAGCTTCTTACAGAA  
TTTCT  
CTGCAGATGTTAGAGA  
TTTA  
AGGTCCTATTGTAGGCGCTTCTTT  
GGAGATGGAGAT  
CAAA  
TATTCCGGCTATATCTCCCGACA  
CAAA  
CGTTAATTCGTAGTATGGAGAGATCC  
GAAA  
ATA  
TTTCA  
ATTCTGAGGATATTGACTACCACAGCATCTCAGCACTTAGCTTAGAAGCTAGA  
GAAA  
AGCT  
TTTCT  
TAAATTTA  
CTCCACGCACTATTGGGCTGTCAGCTAGAA  
TTTCT  
TGGGA  
TTTCT  
TGTGGCAGATAT  
TCAAGTGTCTCATGGTCTCT  
TTTGAA  
GAAA  
GATGCTCATTAATTGCGTT  
TTTGT  
TTCATTGCGAAGGGCTGCC  
TATT  
TTTAAA  
CAGCTCCA  
ACTCGAAGAAGCTCTTCTACGAACCTCTTCA  
CAAAA  
TTTCT  
TGTCTGG  
TAAAT  
ACACATCTTCCGGAAGCTGTGGTATTGGGTA  
TTTCT  
CCGCAAGCCTGAACGAGATCTTACGTTAGAACATT  
TAAA  
AGAAGACGGAA  
TCCCTATTATCCGTCGCTATAGCGGCGGAGGGACTGTTTT  
TTTG  
GATGCAGATAG  
CTTGATGGTCTCCTGGATT  
TAAA  
TTCCCCTACTCCATCTCCATCTT  
CAAA  
AGATCTCCTGCAATGGACT  
CAAGATA  
TTTA  
TGCTCCTATCTTCCC  
TACAGGATTTAAA  
ATTAC  
GAAA  
ATGATTACACTTTT  
TTTG  
GATA

AAAAAATTGGCGGAATGCGCAGTACATC CAAA AATATCGATGGGTTTCATCACACAACATTTCTTTG GAA  
TATGAATCC TAAA AAGCTTGCTCGCTACCTTCTACTCCT GAAA TTCAACCTTCTTATCGA CAAA ATCGT  
TCTCATGATGAA TTTCTA ACCACAATCTATGAACTT TTTGATTCAAGAGAAGA TTTCTTATCCAGT TAA  
AGCAATCTGCAGCAAGTAAGATGGTGTGGGAACAAGTTCTATA CAAA CACTCACTCCGATGCTCAGCCT  
TCCTCACC GAAA AGCTACA CAAA TCCTA TAAA AAAAAACACCCCCCTCTGCACGGTGCAGAGGGGGCTT  
GCACAATCT CAAA AACACTACGCTACAGAGTTAACTACTTCTGTCTTAG CAAAGAAA TAGCTTACCTCAA  
TAGCGGCATTCTCTAGACTATCGGACCCATGAACAGCA TTTA CTCTATCGATTC CCGAA TAAA GCTCG  
AATCGAACCTTCCGAGCTTC TTTA GGATTGCTTGC TCCCATCAACTCTCTGTTACGGGCGACAGCGT TT  
TCCCCTTGCAGTACCATTACTACAACAGGACCAGAGATCA TAAA GTCTACCAGTTCTTG GAAA AAAAGGTC  
TCTC TTTA TGAACAACA TAAA ATCTTCTGCCTCT TTTA CCGAGAGATGAACCAT TTTTCATGGCTGCAAT  
TCTTAGCCCAGATT TTTCAA AATAGCAATAA TTTCCCTATATGAGCCTTGCC TACAGAATCAGG TTTG  
ATAATTGATAGAG TTTG TTCCATGTATTCTCCTTGTGCTCTC TTTCTCCTGTGCCATAGCACGCACAA  
GCGAGTCATCTCTCCGTA GAAAC GAAATGAGGCTGAT TTTCAACACAATTGTAA GAAA ACTATAACTTA  
GCTCAGCAT TTTCA GAAA TACCTGC GAAAGGATCCCTGAT TTTCTAGCTT TTTCTTAATGCTATAGGAAGC  
AGTTCGGCTACTGAAGCTTCTTTCAGATAATTCT TTTA CAGCCTCGGT CATCATACGATCTGCTGCAAGAC  
GAGAGAACCCAAGATTCATTAGAGCTCCGATTCCTTC TTTGAAA GAAGAATTCGCTGTGAGGAAGGAAC  
TACGGGTTCTCTAAG TAAAGGGGCAT CAAAGTAGGAAGTT TTTGTTAAGATCCACCATCAGCT TTTCT  
GCTGTTTT TTTCCCTATCCCAGGAACAGACGCAATAGC TTTACAT TTTCTAAGCGCGCAATAGAACACA  
ACTCTTG CAAAGGGAACATATTTAAA ATAGATAGTCTGTTTTA GGGCCAATACCA GAAAAA GAAA TTAA  
TAAAC GAAA AACTCCC TTTCA GCGCGAGAGC TAAA ACCGTATAGAACGTGCTCAG TTTCA CGAATGACG  
CTATGAACA TAAA TCAGCACCTCTTGATGCATAAAA TGCGCG CAAA TCTAC TAAAAA ACCTCAGAAA GCA  
TAATAGCATATCCTATGCCGAAGC TTTCAATCACAACATAAGACCCATCAATATGAGT CAAAGTGCC TTT  
AATATACTCGTACATGAGTGCCTAATTCCTATCTGTTATAACAAGAGTCTTC TTTAAA TCCTGATAAGGAGC  
GAGATGTGCGTGGCACATGGC TAAAG CAAAGGCATCCGCTATATCCTCATTATCTTCTGC TAAAAGATCT  
GGAACACGCAATAA TTTGCTCACCATTAACTGTACCTGCTTCTTAGAAGCATTGCC TTTACCCACAGCAG  
CTTT TTTAGCCGATTTGGGAGCGTATT CAAATACAGGGACATCCTG TAAAGATGCCGCTAATAA TAAAAC  
ACCTCTAGCCATTCCCAGCTTAATGGTACT TTTGGGATT TTTATGGACGTA CTGCTCT TAAAAACAACA  
GCT TTTA GGAGACTCTTGTGGAAGAATTGTG GAAA TCTCTGTAAA CAACTGTTTA TAACGATGAGC CAAAG  
CTAACTTCTGAGAGAGCTTAACCT TTTCCAAA ACTATGTGGGTGAATGTGATATCGAT TTTCTACCTTAAT  
CAACGCGTATCCA CAAA CTAACGTTCCCTGGATCTATCCCATGAT CAAATCAGCCATGCCTTTCTTAAACA  
CTCGGCTCTTGT CAT TTTCTATA TTTGTG CAAA TTTTACACAATAAAG GAAA GGGTTACTAA CAAA ATCA  
GGAATCTCC CAAA AGGC TTTACTAT CAAACCTCTCT TTTTCGTAAA AAGCGATCTA TTTGCTCTTCAAGT  
ACTCGAATCTTATGTT CATAACATAGCCTACGGCCTTCGCTGACTTCCATCTGCTGAACAC TTTCAACTA  
AATCAG TTTCAACTCATCGATCACATCAT TTTGATGACGCGCTTGTGTAAT TTTCTGC TAAACGATT  
TTGCAACCAATGAT TTTCTGCCTGTAA TTTAGAAA TCTCTTGTCTGA TTTGCAT TTTCTTGAGATGCCAAT  
TGAGAT TTTCACTCACAGACCTGTGTTCCATCTGCTAATGATTGTTCTTTACTCGCAGATTGGAT TTT  
GCATCTGCTTCTTG TTTCTAAG CAAA TCTTCGCTCATT TTTGAA CAAACAC CAAA CAACATCTGACAAGT  
ATTCCTCCATTCCACAATATCAGAGTC TTTCCAAA GA CAAAACAGCTGAAGCATGGAACGAGAATATTCT  
TCGTATTGATCAGGAGAAG TAAA TGCACGAAC TTTGCGAAAACCGTAA CAAAGACAACAGACGTAGCTTAA  
CTAAA GAC CAAA GCCACAT CAAA GAGATACCCCAAGT TAAATAGCTCTCCTCATCTA TAAAT CAAA AAGG  
TATTATTGCTCTCAAGAACCAGAGAAA AAAGATGTGCTCAGAACAAGACTCGAACTTGCACGGGC CAAAGC  
CCAAGGGAT TTTAAGTCCCTAGTGTCTACCATTCCACCATCTGAG CAAAACGACGAGGACCC TAAAGAG  
TCCTCGCCACAGC TTTACAAGAAGTTCTAGCACGCACGACTG GAAA AGCTACAATGGATTGTATGTTAAA  
GTTCTAAA AAAAAAGCAATGAACTTCTTACTCTTCTGAA GAAA TACTGTCATGAACAGGAGTTCTTCTAA  
TGAAA GACTTGGCTGCTCTTGAGATTCTTCAGCAG TTTGATCTTTTCTTTAG TAAA AACAACCGTGTCC  
TCATCGGC TAAA ATAGACTCAATAACATTGCAAC TTTCTGCTGACTAAA GCGTTTAGAGACTCA TTTAAAT  
CCACTGAAGTCACAGGCTGAGACTCTTCCCTCGGGTTCTTCTGGACCATCA GAAA TCAATCGAGTAGGAGG  
AGGAAT CAAAGAAA ACCGTGCTCACT GAAA TCGCCTTCCCTCAGAAGAGGACTCTTG CAAA CATTCCTCT  
GCTACGGTGTGATCATCTCTTGAGAAGATCCAACAGCATCGGCAATCTCTTTA CTA TTTTCGACGACGTC  
CTTGTT TTTCTTATCCTTCCA TTTCTCATTCT TAAA CTCT TTTCTGTCTCT TTTCTTAGACATTTGAGC  
TACAGGTGTAGAAGCGGGAGCTGCAACAGTAGAGTCTGCAACTACCTCTTCTTCA GAAA CAATCGTATTA  
TCTTCCGATACA GAAA CTATTGGAGCCACCTTCGGCATC TTTAG TAAAGCTTCCC GACTACCAACAATCT  
TGACTCCAGCATC TAAA CCAACAGC TTTAAGGTTGAT TTTAGCATCCCGGAT TTTCTCATCACTTATAATC

AGATGCTGGCAGTAAA AACGGCTTACTATGATCACAATTACGGAAA AAAGTAGTCCCTCCAAA CGGACA  
ACCTCTATAGCCTCAACGACAAA AGGATCTTGGGACAAGTGTTC GAATTACGAATGGATAACTTATATC  
CTTCTCTAGATGTAATAACAGTCTCTATGACTGGATCTCTTGTAAA ATACACGAACGAACC TTTATTTAG  
AGT TTTCTTGTACGTACTCTAA TAAA TCCACTATGCGAGTTGCATAGCCTA TTTCA TTATCATACCAAGC  
TACCAATTTGAAA AATCGATCGTT CAAA GCAACCCCGGCTTGAGCATCGAATATAGATGAATACTCACAG  
CCAA TAAA ATCAGAAGAGACTACAGCTTCTTCCGTGTAGTACATAATATTCTTCATGCTCGTG TTTG CTG  
CATGCTTCACAGCTTCACAGATAGCCTCGTACGTCGTGGCTGAGCTCAACTAACAGT TAAA TCTACTAC  
AGAAA CATCTGCTACAGGCACTC TAAA GGCCATTCTGTTAAT TTTCTTTAAGCTCAGG CAAA CACAAC  
CCTACAGC TTTAGCAGCTCCTGTGCGAAGCCGGGATAATATTCTGAAA AGCTCCTCTACCCCTCTCCAAT  
CCTTACGAGAAGGGCCATCAACCACACTCTGCGTAGCTGTTGCAGCGTGAAGTGTGTCTATTAGCCCTTC  
TTCTATAC CAAA ATTATCCAATAGAAC TTTGGC CAAA GGAGC TAAA CAATTGGTAGTACAGGAAGCATT  
GAAA TGATGACGTCAGCTGGGT CAAA CTGCTGATGGTTAACTCCATAA CAAA CGTAGGGACATCGCC TT  
TCGCAGGAGCTGTGATCAACACTCTC TTTGCTCCAGAGTCCAAA TGC TTTGCAGCATCATCCCTATTGAC  
AAA CAATCCAGTAC TTTGACGACGACATCAACATC CAAATCCTTCCAAGGAAGCT TTTG AACGTC TTTT  
TCCGCTAAGAAA CGGATC TTTCTTTCTCCATAAC CAAACATCCATCC GAAA ATGTTGCTTGAGGAGCGA  
AAGATCCGTGTGTGGAATCATATTTAAATAAA TATGT TAAAAGATCTCCTGCGAC TAAATCATTAATAGC  
TACAAC TTTCTATGGGAGAATTCCT TTTCAGAATCTGTCT TAAA ACTAATCGCCCAATCCGTC CAAA ACCA  
TTAATCACAATTTCTATTGC TAAA TCCAGGTAGTCAAGTGT TTTTCGAAA AATTAGCATCACTATGC TAAA  
AATTCTATGATACACT TTTGAGCATTATCACCAACCTATT TTTGCAACTT CAAA ATGCGCGTATACCCGC  
CAT TTTCTCGAAGAAA ACCTGGTTGCTAACACAT CAAA TAAC TTTCCAATGACTCTTCTATCAACATTATA  
AGCAGACAAA TCTCCAGC TTTA ACTTGGCGAGCCTC TTTGCTAGTCAACGTATTATATCTGACCATAAGA  
CGCCCTACAGCTAATCTTCTTGCAGCTAAGGTATT TTTCTTAGC TAAA GTAATCAT TTTGTCTGCATGCC  
GACGCAACTCTTTG GC TTTAGGCAATGTAGTCTCTATTCT TTTCA TTGTGAAT CAAA GACTTCAACATATT  
AGCCAACATGCAACGGTTATGAGACGAAGTACGACCAACCC TAAA TTTT TTTCTAGCGTGTGCATATCT  
CTT TTTA TCCCTTGTATT TTTA CTGACCGAATTT TTTCCGCATACCACTTCATTT TTTCTTTA ACGTT  
ATCCAGACCAACAC CAAA CTGGCTGAGGTCCATGCCTAACTCTAA TTTCA TTTCTTTT CAGTTTA TTCTTA  
ATCTCGCAGAGAGACTTCTTCCC GAAATTTCTAAA TTGTAACAGACGAGGCTCTGGCATAATTACCAATT  
CCCCATCG TTTGATATTGGCATTAGATAAA CAA TTTGTAGATCGTACAGAAA GTTCTATCTCATTAAT  
GCC TAAA ACCAATTTA TGAAGAATATCGTCT TTTGT TTTCTTTCTCTACAGAGATTGCTTCTT CAAA AACG  
ATTCTCTTCTCGTCCATTT TTTTCGAAA ACAGAAA AATGCTTACT CAAA ATCTGTGTAG CAAA AGCTACAG  
CTTC TTTAGGAGCCACAGACCATCGG TTTCACTTGAACACT TAAACGATC GAAA TCTGTATCTTGTCC  
AACGCGGGTGTCTTCAA CAAA ATAGTTAACCAGAACACAGGAGAGAATGCCGCATC TAAA ACGATCTCA  
TTCATGCCTCTTTCTTCAAGAACGATTC TTTCAAGAAGGAGATCCTCTAC CAAA AGCAACTCGCAACA  
TAACCTCAAGTTGCATTGGACGCGTGACCG TAAA AATTACGTGCTCAGGATTGACCGCTT CAAA AGTTCC  
TTCTGTAG CAAA TCTCC TAAA GTAACTTCTTCTGCCCACCAGCAGCAGC TAAA TCGGATGCATCAACA  
GAAA TCGTAGCTCGTAACT TTTGAGAGCATCTTCCACCTTCACAATCTTGTAGAGGATACTTT TTTA AGCA  
ACGAACC TTTCAA ATTT CAAA ACGATATTGGTAACATCTTCAATGATCCCCCTACCGCCATATATTCGTG  
CAAA ACTCCTGTATAGAGAAA GAGACAATAGCAGGAGCTTCCAAGCCGATTAACAGAGCACGTCGCAAG  
GCGCTTCCCAAGGTGTGCCCCATCCCTT TTTCAAGGGATCTGCAA CAAATCGAGCTAC TTTA TCAATGC  
CGCCAACAGCCCCCTCCACAGGAGACATCTTACCATTAGGCAACT CAAATTTG TTATAAAG TAAATT  
GTGTGAACTATCCGACATCC CAAA CTCCTTAGCTATAACTACACTCTTCTGTCGT TTTCTTGGTGCACACC  
CGTTATGAGGGACGGGAG TTTCA TCTCGGATAACG GAAACGATAAGCCAGAA GAAA TTAGCGCTCGCAC  
AGCAGATTCCCGCCCTGCACCAGTTCCT TTTAAGCCTACTTCAACTTCT TTTA ATCCAGAACTCATAGCA  
GCCTTAGCAGCATCTTGGAGCGGCAACCGTCGCAG CAAATGCTGAAGA TTTACGAGAACCAGAATAACCAA  
CTTTCCAGCAGAAGCCCAT GAAA TCACATTACCAGCAGGGTCTGTTATGGTTACAATTGTATTAT TAAA  
AGTAGCCTTAACATGGACAACGCCGAAGGAATGTT TTTACTTGT TTTCTTTTACGCCTCTTT TTTGC  
GCTTGATT TTTAAC CAAA AACTCTCTCC TAAAAATTATTA TTTCTTCTTACCTGCAATAGT TTTACGTT  
TACCCTTACGCGTGCAGAA TTTG TT TTTGTTCTCTGACCACGAACAGG CAAAGAAA GTCTATGTC TTTG  
TCCACGATAAGCATGGATAGTAATCAGACG TTTGATATCAGATTGCACACGACGGCG CAAA TCCCTTCA  
ACAACGTAATCCGACTGTAAAAGAGCG TTTAGTCGACCAACCTCTTCTCAGTCAACTCTGCAGCTCTAG  
CTTCCGGGATTCAACTGCAATCTAGCAATAATCTC TTTAGAAA GAGCTGGCCCTATTCCA TAAA TATATGT  
AAGACTTATTTTAA TTTCTTTTTC GCAGGAATATCTATTCCAATGATGCGCGGCATACGAAGGGCCTCC  
CT TAAA GTAGTATAAGCATCTTAGGT CAAA AATTGTTATT TTTCAAGGTCTTCC TTTGGGGCGGTC TTTCT

TTTAAA ACTCCGTCATAACGCCGGAC TAAAAGGAAA GCATCAA TTTG CTTTCATCGTGTCCAAGATGACTC  
CGACTACGATCAGCATGGCTGTTCCACC CAAAAAGTAGCTAACGTTTCGCGTCAACTCT CAAAAATCCTTCC  
CAAAACGGAAGGTAATATAGCTACAACAGCTAAA AATACAGCTCCTAG CAAA GTTACCCTATTCATTGTG  
TATTCAAGATAGGTCTGGGTTGG TTTCCCTTGTCTAATGCCAGGAA TAAACGCTCCATT TTTCTTCATTT  
CAGAAGCTATTTG CTCTGGACGGAAC TGCCTAGCTGTC CAAAAATAAGT GAAAAATATAATAAGCAACAC  
ATAAA AAATGGAATACGCCACACTACCTGGGGACAGCATAGTCGCAATGCG TTTCAACCAAGAAGATTCC  
GAG GAAAGAAA CTGCCAATCGTAGCTGGGAACATGAG TAAAAGAGGAAG CAAAAATAACCGGGATTACTC  
CAGCATAATTAC TTTCAAAGGAAGATACGATCCCCCTCTACAACCTCTCTCCTTCCAATAATTCTACG  
TGCATGCTGAACAGGAATCTTTCTTACACCTTCAATAATGAGCACAGTTGCTATAAGAA CAAAGA CAAAA  
ACCGCG CAAAGAAT TAAAAGC GAAA CGATT CAAA TTCAGAAGGATCCTGAGATCC CAAATTTA ACTTGT  
TAAA TATAGACCC TAAAACGGAAG GAAAAGAGGCTAATATCCCGAGAGTAATGAT CAAACTGATTCATT  
ACCAATCCC TTTGTCAGATATTTG CTCTCCAACCCACATAAG TAAAAGAGTCCCTGTTGTCATAACCACA  
ACAGTTGT CAAATAAA ATACCCAAGGCACCC CAAA CAGCTTTAAGGACAACATTGCTGG CAAAAACAATCC  
CTGGAACAACAAGATTCATTTCGAGAG CAAATTTTGCAAAAAG CAAAGACTGTACACAGGCTAGAACAAG  
AG TAAA AAGCCGTGTCATTTCGTCCTAA TTTACGCTTCCCTTGATCCGGCGACTCTCGCA TTTCTC TTTGTC  
AGAGTCGGCAT TAAA GACGACAAGAAGCTGTACAATGATTGAAGCCGAGATGTACGGAACAACCTCCAAGAG  
CTATTACCGTCATTTGAG CAAAAGCTCCCCA GAAA AAATGTCAGCTAACT GAAACAAATTTTGCTAGA  
CCCCAGCAATTGGT TAAAAGTAGGCTACGGCGGGTCTCCGTTAATTCCAGGCACAGGGATAAAACACCCCG  
ATTCTACATAATGCAAGCAAGGAAAATGT GAAAAATATTTTTTTGTCGCAGTTTCG GAAATCGAAAACACTT  
GTCGCAATGTAGCCA TAAACTTTACC TAAAAGTTCTAGT TAAACAGCCTCGATAAGACTTTTTACTCCTT  
CTGACAGCACTATTGCAGCATCTTTCCAGACTAATTTCTTATCCAGAGCTCC TTTAAGGATTACTTTAAC  
ACGAGAAGTCTCTCTATGGATAACT TTTCTTTCT TTTTAAAGCTTC CAAAGATACTTCTGCGCCATTGTCA  
AAAATCTCATT CAAA CGTTGTGTTGTGATTTCTTCAACACATTTAT CAAAGCG TTTATGAGAAAATCCTC  
GTGTAGGAACCTCTCTGTATAAAAGGTACGCCTCCCCCTCATATCC GAAACGTCCTTGTATCCAGAACG  
GCTACCGTCCCC TTTGTGTCCTCGACCACTTGT TTTCCCGTGACCAGAAGAAGGTCTCGGCCAAGAGT  
TTCTGTTCTTCGCTTACGAGGCGAAGGATCTTG TAAACACTCTAACTTAATCATTGATAACGGCTCTCCTT  
TTCATAATATCATCTTTACAAGAGAGTGT CAGGAGAGC TTTAAAAGCCGCTTTAACCTGATTCATAGGAT  
TATTGGATCC TAAACTCTTTGCTACAATGTCC TTTACCCCGCCATCTCT TAAAATCAACCGAATACGAGA  
TCCTGCAACGATTCCGTTTCTGGCTTAGCAGGT TTTAACAGAAGCTCTGCTCCATCATGATTGACAAGA  
ACCTCATGAGGAATAGATCCTCCCTCAAGAGAATTGATAGAGACAAGATTT TTTTCGAGCAGCATCCCCAC  
CTTTACGGATGGCATCAGTTAGCTCGTTAGCT TTTTCG CAAATCCGAAGCC TAAAACGCCCTTTCTATCGCC  
AACT TAAAATAAGCGCA GAAAAAC TAAA CTTACGGCTTCC TTTAACACCTTACAACAACGGTTGACGACG  
AGAACCTTCTCTCCAGCTGATCTTCCTTATGAGAA TTTCTTGATAGCGTCATTATC TAAAACCTTCATTA  
AAACTGTAATCCACCCTCTCTGGCTCCATCAGCAACCATAGCTACTACACCATGATACTTATGAGCTCCT  
CGATC GAAAACAACCTCGATCTACTTGAAGGCC TTTCCCTAATT CAGCAATTTTATTTCC CAAAGCTTTTGG  
CATTATCCTGATTT TTTCTAGTTAATCCAGAAGTT TTTGCAACCTTAGC CAAAGTT GAAATAAA TGCTAA  
AGTT TTTCCCTTCAACATCATCAATCAGCTGCACA TAAACATGCTTA TTTGTCTTTACAACGGATAATCTG  
GGCTTTAAAGAACATCCC TTTAAGGC TTTCCGCACTCT TAAAAGCTCTACGAGCTTTCCCGGAAGTTTCT  
TATA TAAAAGAGCTTTCCATAGTTGACTCTAC TTTACCTCTATTTTTTACCAGTTTTTCGCTGCTTTCCC  
AGCCTTACGACGAACATATTCGT TTTCTGTAACGAATCC TTTACCTTTGTATGGTTCTGGAGGGCGTTT  
GCACGAACACAAGCCG CAAATTTCTCCAACCTAAGTCTTATTGATACC TTTAATGGAGATCAATGTGTTTT  
TCTCAACAGAGACTTCTAATCCCGTAGGAATAGGCATT TTTGTAGGGTGAGAAA CCCCTATTGACAGATC  
TAACAAGGACCCTTGTACTGCAGCTCTGAAGCCGACTCCGATCA TTTCTAAAACGCTTCT CAAA TCCAGTA  
TGGACACC TTTGACCATA TTTGCTATTAAGGCCAA TAAAGCCCTTGATACGACCAGGTCTGTCTACAA  
CGTGAGCCGAGGAGCAA CAAACACCTCATTACC TTTAACGGCAATCTCAACTTC TTTAGCCAATACCTG  
CGT CAAAGACCC TTTAGGACCTTTTACTGAGATTTCAATCAT TTTGAATAGAGACCTCTACGCCTTGAGGA  
AGCACAATAGGGTCTCGAGCTTTACGAGACATTCGTTACCGTCTAATCTTTTAA TTTGCTAC CAAACCA  
AACAAA GCAATTCGCCGCCAACATTCCTTAGCCCTTGCTACAGAGCCTTC TAAAACCCCTTGAGGAGTCA  
AAGAACGGCAATACCCATA TTTCCAAA TACATAAGGAATTTTTGCTGCAGAAA CA TAAACCCCTCTAGAA  
GG TTTAGACACACGCTTAAGAGCATGAATCACAGGCTACGATCTTCCCCGTACCG CAAAAGACTCTCA  
TTAGTCT TTTGCGAT TTTCTTCT TTTACTAAA AAGTGAGCAACGAACCCGTGCTGCTTGAGAATCTTAC  
TATTGCTTCAAGCAT TTTACTATGCTCGATATCAATGTA CAAA TGCTCTGCCAT CAAAGCAT TTTGGAATC  
CGTGTCAA TAAATTTGCGATTGAATCACTCGTCATTTCCATAACCGACCTACATCTCCCTTATTGAGCCTT

CTT**GAAA**CGCAAGCCATACACTCTAACAAGGTAAGGCACTCCGCATCGG**TTTG**TGCTGTAGTTACCCAA  
GTAATATTCATTCCCTGAGATCG**TTTA**ACACGATC**TAAAT**CAACTTCAG**GAAA**GAT**TTTG**CTGATCATCT**TA**  
**AA**CCAAGGGAATAACATCCTCGTCCATCTCC**TTTA**CAAGAGAATCCCT**TAAA**GTCTCGAATTCTTGGGGA  
GACAATATTG**CAAAA**AACGGTCCA**TAAA**GTACATACACGATTCCACGTAGAGTGACT**TTTG**CTCCGATG  
CCCTGACCCTCTCGTAACTTGAAGCCTGCGATAGAGTT**TTTA**AGCTCTTGTTAC**CAAA**GGTT**TTTG**ACCAG  
AGATAACCGCCAATTCCTC**TAAA**TGAGCCTG**GAAA**AGGTT**TTTA**TCC**TTTG**CAGCCTCTGCAAGCCCAT  
GCTTATTACGATCTTCTTAAGAACAGGGAT**TTTG**CATTACAT**TTTC**ATACT**GAAA**CTTATCTTGAAGAGTC  
**TTTC**TTATCTCTTCAGTATATAGT**TTT****TTTA**ACCTGCTCATATTAACCC**TTTC**TCTCTTTACCAATCGG  
TATAATGAAGAACTTCCATCGGAATGCTTATTC**CAAA**GCTCTCGTCC**TTTC**TCTGTAA**TTTG****CAAA**CA  
GTCTAGCAGGCTGATTATCGATACT**TAAAC**GTACGTTA**GAAA**TATGGAGAGGAGCCTCAATATTAATGCG  
CTTCCC**TTTAG**GATTCTCTTGAGAGCG**TTTA**AATAT**TTTA**CTCGGACATTGATTCTTCAACAACAACC  
TTATCCTT**CAAA**CAACG**TAAAC****TTTC**CCTTGCTTACC**TTTG**TCG**TTTC**CAGCAAGCACAT**TAAA**CAGTGT  
CACCGACA**CAAA**CACTACGTCTCTTACATACTATCTTACC**TTTAAA**TCACCTCGGGAGC**CAAA**GAGCTAAT  
CTTAA**CAAA**GCCTCTGTCTCGAATCTCCCTTGCTACAGGCC**CAAA**AATTCTAGTTCC**TTTAG**GATTGCC**T**  
**TTA**TCATCGATGATTACACAACCTATTCGTATCGAATCTTAGTGTAAGAACATC**TTTA**CGATGGATATCG**T**  
**TTC**GAGTCCGTACGATTACAGCCTTAACAACATCCCC**TTTC****TTTA**CGAACTATCAGGCTCAATATCTCT  
TACAGAGCATACAATCACATCACCGACCGTTGCATAACGTCGACGAGATCCGCCTAGAACC**TT****GAAA**CAC  
TTAA**TTTC**TTAGCCCTGTATTATCGGCAACT**TTTA**ACTGAC**TTTC**TTGCTGGATCATAATTGC**TAAAC**  
CACTACTAA**TTTA**CAGTCCGACAACCCGCCATCTCTCGT**TTTAG**AG**CAAA**GGACGCGTCTCTTGATTCT  
GAACAGTATCACCT**TTTC**ACATCCAACCTCATATGCGCATAA**TT**CTGCTAGAATCCCTAACCACCTT  
AGCATATTGAGGGTGCAGTATA**TTTC**GACTCGAACAAACAGT**TTTTTTTC**CATT**TTTG**ATGAGACT  
ACTACCCAAT**TTTG**GTC**TTTC**TACGGCCTCTCACACTAGCCATGGACTCTATCCT**TTTTTTTC**TTGT  
**TTTA**TTATTAGAGCAGGCAATGCT**TTTC**TTATACAG**GAAA**ACTGATGAGT**TTTC**ACAAC**TTTA**TTCT  
GT**TAAA**GCAGTTCGCGACG**CAAA**GCGAAGAGAGCT**TTT****TTTA**TTATCACGAAT**TAAA**CTCATCCAACCTCTTC  
AGAACTCTTCTCTTAAGCTCCGCTAA**TAAA**TTCTTT**TTTG**CTCCATACTATA**TTTC**CACACGCTT  
AAC**CAAA**TCGTGTTCTAATTCCTAAC**TTTG**CAGCAGCTCTTCT**CAAA**GCATCCTGAGCATCTTC**TTTC**CGAA  
**ACG****TTTG**CCACTTCGA**TAAA**ATACGTCGGGACGACAACAGCTACCCAGTGATCAGGAGCTCCCTTAC  
CTTTACCATTTCGAG**TTTC**CAGCAGT**TTTTTC**GTTACACTCTTATCTGG**GAAA**ACTCGAATC**CAAA**CTTT  
CCCTTTACGT**TTTAAA**TATCTGTTGATAGCAACCTGCATGCCTCA**TTTG**GCGGCTGGTAATCCATCCT  
CTTTCCAGAGTCTGCATTC**CAAA**TTCGCCGAAGTCA**CAAA**CGTTGCTCCCTTACTCAATCCAG**CAAA**CT  
GACC**TTTC**TGCTGCTTGC**GAAA****TTTG**TTCTG**TTTA**GGCATTAAACATAATAATTACACACCCCTTATAACC  
TGCTGCACTACGCAGCAGCTGTTGAAGCAGCACCTGCATGATTAGCCGCAGGAACGGCCTTCT**TTTC**AC  
CAAGATTAATC**CAAA**CT**TTTA**TGCCGATAATTCATAAGTAGTCTCTGCAGACGCTGTAGCATAATCAAT  
ATCTGCTCTGAGCGTATGAAGAGGCACACGACCGTTCTTATACCATTCCGACCGCAATCTCAGCTCCA  
GCT**TAAA**CGACCAG**GAAA**CCTGA**TTTA**ACTCC**CAAA**GCACCTGCATCCATTACAGATTG**CAAA**GCCTTT**TT**  
**TC**ATTGCTCTTCT**GAAAGAAA**CCCGT**TTTC**TATCTG**TTTG**GCAATACCGTCTGCGACGAGCTGAGCGTT  
AAGCTCTGGGCG**TTTA**ACTTCTGCAATCTCAACC**CAAA**CATC**TTTG**CCTGTTAGCT**TTTC**AGCTCGGCT  
**TTC**AGAGACTCTACTTCAGCCCC**TTTC**TTCCCGATTACTAATCCAGGTCTAGCAGTATGGATAGTAACTT  
CAAT**TTTA**ACCGCTCATA**TTTA**ACAACGAATCCCGCAGCACCTTGACAAGAAG**TTTC**CTTCT**CAAAA**  
TTCTCTAAT**TTTC**ACATCTTCAATG**GAAAT****TTTC**CGAATCTTGATTATTCCCATACCA**CAAA**GATCGC  
CA**TTTC**TTAGTAACCGCTGTGCGGAACCCTACTGGACATCCT**TTTG**ACCATACTTACTCCTACTGCC  
CTCTCTCGCCAACAATCACAGTTAGATGACTCGTGCGCT**CAAAA**ATTGGGGCTCTTCCCCACGACTCTT  
AGACTTCATTCT**TTTG**AACATTGGGCCGGCATCAACCCGA**TTTC**CTAGAAC**CAAA**GAT**TTTC**ACGT**TTT**  
**ATAT****TTTC**ATTGGACTCTGCA**TTTG**CAATAGCGCTATCCAACACTTT**TTTA**AGGCATCTTCCAGCCTTCA  
TCTGAG**GAAA**AGCTGAGTTGCTGTTGAGCTTCAACAACACTACGG**TTTC**TCATCAATCCTGCAGC**TAAAC**CG  
AGCC**TTTC**TTGGCTGAACCCGTATGTATCGGGCTGTGCG**TTTAAA**CATAACCTGTCTCCTTATGACTTAC  
CCTTT**TTTA**ACGGGATGGCTCT**TAAA**CATTCTTGTGGAGAGA**TTTC**CTCCAACTTGTGTCCAACCATAG  
**TTTC**TGACAC**CAAA**GACCGT**CAAAA****TTTA**ACGGCCATTATGAACCT**CAAA**AGTGTGCCAATCA**TTTC**AGG  
GGTAATCATAGAACGACGAGACCAGT**TTTG**ATTGGAGT**TTTC**TTCTC**CAAA**AGCGTTCATATCTCGGACC  
TT**TTTG**GAGAAGGTGATGATCA**CAAA**AGGACCT**TTTC**TTAGCGATCTACTCATAATCCCTA**TTTC**CTTCT  
ATCCTTAACTATCCACTTATTACTCTTACGCTTATCACGAGT**TTTC**AATCC**TTTC**GTGACT**TTA**CCCCAA  
GGGGTCTGG**GAAA**TGTATCCGTTATGACGCCCTTACCACCTCCGTGTGGGTGATCAACAGGGTTCATAG  
CTGTTCTCGAACTGTTGGCCGAATTC**TTTC**CATCGACGACGCCAGC**TTTA**CCGTCTACACACAGATT

GTGATCTGCATTGGAGACCTCTCCGACAGTAGCTCGGCACATTTCAATCAACATACGAAATTCGCCAGAA  
GGCATCTTCAAAAGTGACGTATCCAGCTGTTTTAGCGATGATCTGGGCTGAAAGTCCTGCAGAACGGACTA  
ATTTAACCCCGGAGCCAGGTCTCATCTCCACGTTATGAACGAAAGTCCAGAGGGATGCTCTTAAGAGT  
CATGCAGCATCCAGTTTTGAAAGGACTTCCTTCTCCAATAACACGATCGCCTCGCTTAATTCCTTTA  
GGAGCTAGAATATAACGCTTTTCTCCATCTACATAATTC AATAGAGCAATATAAGCAGAACGGTTTGAT  
CATACTCCACAGAAGCAACCTTCGCTTCAATACCGTCTTTATTACGTTTGAAGTCGATCACTCTATAATG  
ACGCTTACTCCTCCTCCACGATGGCGGCAGGAAATATGTCTTAAATATCTCGCCCTCCAGAGCTCTTT  
TTGAAAAGAAAGAAAGCTTTTATTTGACGAACACTTCTCTAGAACTAGATCCCCTTAACTCTCCTTGAG  
TAGTAAGCTCATCAAAAGAAGGCAGAATTAAGTGTCTCGTCCCGGAGTTACTGGCTTAAACTTTTAA  
CATGTTATTCTTCTTCTCCTTCTTTACTAACCAATAGAGTGACCATCAAAGTCAACAATAGCCTTCT  
TAAACCCTGCGGTTCTTCTTTCTTCGGCCTCGGAATATTCTTGTAGGTTGAGGTTTAAACACACATGGT  
GTTTACTTTTAAACCTTACACCCTTAGCAGAAATAATGCTTCTATGGCTTACAGCAATCATAGGCTTC  
GTGGCGTCCCAGCAACAAATAATGTGTACTTAGGATCTTTGACAGAACTGCCCTTCTTTTAACTTCTC  
CGTCCCAGACTCAAGCCTTCCAACATCTTTGCTTCTCGGTACATAATGTCTTTTGACAACATCATA  
AGGATCTTTTCATATCCTCGCTTCCCCCTTAATCTTTGTTGTAGAGACAAGACTCTCGACAAGCAATTC  
AAAGCCTTTTCTGAAACCAATAATTTCTAGCAGCGCAATATCGTATCCGCTGATATTCTCTCCGTAAG  
TAAATCCTCTTACAGCAGCAAAATACGCACACTCAGTCTCAAAATCTCATTGCTTCCAACATGAGCTAA  
GCTGTCAACGAACAATACCCACGGCATTCTACGTTGCATTCTTTAAGAATCTTAAAGCTTCTTTTGTCT  
TTAGGAGCATCCAAGCTGCTAAACAAACAGAGTTCTCTGCAACAATCAGCTTGCCTGTTTGAATTTT  
GAGCCAAAAGCAACC GAATAGCCGCTCTTCTCTCTTTTTGTTGATACGAATATGCTGATCAAAATTTTGG  
CTTAGGACC GAAACAATCCCTCCTCCTCGGAATTGAGGAGCTGCCAAGCAACCCGACGGGCATCCCC  
GTCCCTTTTGTCTTAAAGGCTTTTAGTGAATGGCTAACTCCGATCGTCTCTTGTGCAAGCGCTCC  
ACTGACGTTTGTGCTGAATGGCCACTAGATAATCTTTTACTGACTGCTCTCTCCCTTTCAGTAAAGAA  
GGCATCAGGCAATCAAACTTCCCAACTCTTTTCAGAAAATCAAAATTTTGATAATAGAACCATTAGG  
ACCTCTACCCCTTACTCCGCAAGAAGCTTCAACAACAACAGGATCCCTTAAACCAGGAATTGCTCC  
CTTAACGAGCATTACCCTTCTATCCAAGTCAACTTTTACGACTTCTTAAATCTTACCGTAACCCGATCA  
CATCCCATGTGACTTGGACGTTTACTTCCGGGGAAACATCGGCCAGGAGTAGATCGCATCCCAATAGATC  
CTGCATGACGATGAAATCCAGAACCGTGGCTTTTGTCTCCTCGGAAACAAAATTTTTCATCACCC  
TTGGAAGCCCTTAACTTAAAGAAATCCACAGATGTCAACGTTAGATACTCCGTCGAAAATTTCTAACC  
AAATTCATCGCTTAAAGAAACAGACTGAACAGCCTCTTCTGAAACGACAACCTTCTTTTAAACACGACAAG  
CACGTCCTCCGGACTTCTTAAATGTCCGAGTAGTGCCTTGGAGAAACGCTTTTCAATGGTTTCTTCTGG  
AGCTTGGACTACATCAGTCTCTAATTTGAACAGCATTATAACCATCTGAAGATGCGGTTTTCAGCTGGGCA  
ACAACGTTTGCATCTACGCTAATTACTGAACACGCAACAAGATTTTCATTCTTATCGAAGACATGCATCA  
TGCTTCTCTTTTCTCTATTAGGCTAAGCTGAGACCGCATATTTAATTACCTTATCACACAACCTGACAA  
CGCTTACAGACCGCCCCGGTGCCTAATTACACTTTTAGCAAAACGGCCATGCCCTCCACCCTGCAAGAG  
CGATTTCCACGATAAAGAAAACGCGGCTCCTTAAAGCAAACAAAAGCGGCGAATGGGCAATGGTATATGA  
CCTGCGACATCCACACAAGAGATTTTCTTACGCTAAGAAATCCACACCAAAATCGCAAAAACAAG  
CCTGAAAATCGTCTAGGTTTACTAGTGGAGCTTCTTGGAAAGAAACTTATAACGCTTATCCAAGAA  
AATTAAGGGACAGATTATCAAAAGGAAAGCATTTTTACAATAAGAAAGCTAAGCACTTTGTAGATAAA  
AAAGGCTGTTCTTTTAGAAAACAGCCTTTTCTTAAGAAATTTAAATAATCCCTTATACTCTGTTGCAG  
AAAGTCCACAATCCAATAACTGCAGAAGTGAACGTACATCCCGCAGCCACAATGCACGAATACCCATTG  
TAATAGGCAACGGCACCAATTTGAAACGCTCGGCAACGCATTCCAAAACTTCTCGAGCATAGTGAGGAG  
TGCATACTTGATGCGCGTGAACGTCTTGGCTTTCTCTCCAGCGACTCTCCTCTCGCAAGCATTTTCTCT  
CCCGACAATTGAGTGACGACTCTTCTCTCGCAATACGAGCGCAGCGGGCTTCGCAATCTGCTCTTTCCG  
CACTGATAGCGAGTCCAGAACCACCAAAACGCTGCATGGTTAGCCGCCATAATATAGCTAACAGAAGA  
TCCCATATTTGCCTTAGTTTGGGAAAGAAAGAAACGGTTGCGCCAGCATTTTGTGACAAACAGAATCGGA  
CGGATAGCTCCGAATGTGCGGAGGTAGGTAATTCCTCCGATGAAGCTACAGACAGCCGAGCCGCTCTGC  
GCTTATGAGACACAAGGATCTGCTACGAGCCCCCTCATCCCCCTTCTGCGGTTTCTGACTAGCAGCTTT  
CATGTAAGAGAAGAAGCTTTGCGCACCTTGAAGTCTTCTGGCAACGCTCCGTAAAGGCATTCCCATAA  
GCGAGAACAGTTCTCGCATCCCCTAATCTTTGACACTTGGGAAGCTGTAATGTGTGCGGAAGAGCCCG  
CGCTCCAGCTTGTCTCAAAATAATTTGCGGTCAATTCGGCAGCAGACTTGGCGACCTTAAACAGTCTTATC  
CATTCCCTTCGTCTTATTTACTACCTTGCCATTTTATTGCTGGGCTGTGTAAAGAAAGCTTTTAGAGCA  
TTCCCTGTACCAGACCCTAAACGCTCCACATATAGCAGCCATATTCACCTACCTGCTTCAAAATTATGTAC

ATACAAAATTTAGAGAGACATTATACCACTTCTATTACTTAAATCGAAAAAGGAAAACGCAGCAAAACCT  
TCTAGAAAGGCCTCTCAGACCTAGAAATAAAAAATATTTTACTATCTAGAGGCATCAAATCTTTTTTAG  
AAAAGCTTTGAAACCAACCTTGATGGCCGTAAAAAAATCTTTTGCCTTCATCGAAGCTTTTCCTTCTG  
GCTGAACCATACGCAATCGCAAAAGCTCCTTGACGGCAAGCGATCAGCAAATCCTCTCCAGAACTCCAAG  
GACTTCACCTGGATCTCCATAATTGCCAGAGAAAATTCATTCTAGCAGAGAGCACGCCGAGACGGCGA  
GCCTCTTTCCCTTGGGATAGATAGCGAGTCCAAGCGCCCGGAGCAGGCGAGACTCCCCGGATATGCGCGT  
ATACTTGAGAAGCTGGAGCATCCCAATGAATCCCTCCCTCTTCTTAGTTAATTTAGGAGCCAGCGTAGC  
CATCGCTTCATTTTGAGGAACATGGCGCACTGTTCCGGCCTCAATCTCTTGTAAGTCTTTAACAAAAGC  
TCTCCACCAGAGGGCGCTAAAGCTTCGGCTAACCCCTGCAGTCATATCTTCGCCAATGGCTACATAAT  
TCACATTAGCTATATCCCCAGTATCCATCCCAGCGTCCATACGGATCACCGTGTTCAGACAGAACTCC  
GCCATCCATAATAACAACGCTGAATAGGAGCTGCTCCGCATATGCGGGTAGTAACCCAGCATGAAGATTA  
TAACAACCGTATGTAGGGATATCAAAAGCTCCTGCCTTTAAATACACCCCGTATGCGACGACAAATAAAA  
CATCAGCCTGCCATCTCGTAATTGAGCAAGAAAAGCGGGATCCGTAGTCTTAATGGGTGAAGTAAAGG  
AATATTTTLAGACAAGGCTAACTGTTTTACTGGAGAATAATCAGCTTAGACGAGCGTTTTGCGGTTTA  
TCAGCTCGCGTAACAACACCGACAATATGAGTATGTGCATCAAAAGTGTTTTTAAACAGTAGCCGCAA  
ATTGGGGAGTCCCCAGATAAAACGACTCTAAGACTCAACGAAAGCTCCTTCTTTTTATCTATCGGCTCTT  
CTAAAGATGCTTCGCAATCCACGCCTCTCTCTATACCTCGTTTGGCTGGCGACAAAATTCACGAA  
ATGGCGCACTTCAGGGACTTCTCAAAATCTTCTAATACGCTCTCAAAAGAGGCTTGGAAGACTCGTCC  
GAGCGGAAAACCCGTTTAAAGTCTTAATCAATGCCAGACGGGTTTCAAAAGATACCTGCCGCCGTTGCA  
ATCCAACCTTGTTAATTCCCCCTAGAGCATAGGGATTGCCTGTCCCTATAGTGAAGGGGATATCACG  
ACGAATACCGCTCATAGCTCCGACCATTGAGTAAGAGCCTATACGAACTGGTGCACACCCACCATG  
CTACCTATAGTTACGCAATCTCCTACTTGACATGCCCGCAAGCTGTACATGCGTACTAAATACAACAT  
TATCCCTACAGAGCAGTTGTGTGCGATATGCGCCCAAGGCATAATTAACAATTATTCCTATAGAAC  
TGTAGTCCCCTCAATGTAGAGGAGTAATCATAGCAAACTCGCGAATTTTCGCAATGCTCACCAATTTCA  
ACAAAAGTCTTCTCGCCCTTAAATTTAGATCTTGGCGCTTATTTTCGATCATTGCAGAAGGCCAAATG  
TTGTTCCTCGGCCAATGGTTGTGAACCCGTCGATATATGCGTAAGATTTTGACCACTACATCATCGCAAAG  
CGTTACACTCTTTTTTACAATAGCATAGGGCTCTATCGTCACATTAATTTTCAATCCGCGCTCCATCTTC  
ACAATCGCTGTAGGATGAATGTTGGTCATACGCTTCTCTTTTATATGGACTCTTTTTTAAACAAGAA  
GCTGAGCTCTCCTTCAGCGACTACCTGAGAACCTAACAAAGGCTTGTGCAAAAGCCTTCCCACC  
GAGATTAAGAGAACTCGGCTTTTCAAGGTTAATACGTCTCCAGGTTTAAACAGGCTGACGGAATTTGCTT  
CTGGATACCTAAGAACAAAGCGATCTTTTATCTCGATCGTTTTCATATAATCCCTAACAACTCC  
AGCAGCTTGAGCAAAAGCTTCCAGTATTAAACTCCGGCATGATAGGAGCTCCAGGAAAATGTCCCGCA  
AAAAAAGGTTTCGTTAATTGTTACATTTTCTGAGCCACTACCGAACGAGTGTTTTAAATCGTAA  
GAAATTTTATCCACCAATAAAAGGGATACCGATGGGGAAGTAAATTTTGATGTCTGTATACCTAACACGGG  
CTTTTCATTCATTTGACTAATCCTGTTTATGCTGCAACGCCTCTAAAATTCGTTCCTCCCAATGCAATAT  
TGGAAGAATGCCCCGATCCCACGGCAATAACATGTGCTAAAAAAGGCGTTCCAACTAAGA  
CAAACTCTCC  
TATTAATCTAGTATTTTATGGCGAACAGGCTCATCAGGAAACGCAGCTTACCAAGCTAATCAGGCCA  
TCGCTTTTAAATAATACGGCATTACCTACACAGCCCCCTCCTATCAACCCTTTTCATGAGGAAGCAGA  
GTTTCGTGTACAAAGCAAAAGCTCCTGCAAGGAGCGAATTTTCCTTACGAAAAGATTCTTCG  
GAAAATAACCA  
GGAACGATATTGCGTGCCTATCGTAGAGTTATGCGAATAGTGCAGGGTATACGAAATTTTAACTCATCC  
GAGGAAAATGCTGCATAAATCGTATCCTGATACTGATAATAGACAGGATGAGCAAGCCTTGCATCTGGA  
CCGTCTGCTCCTGCTCTTGAATCCCTGCCTGGTCTATCAGGTCCAATAACCTGAGCACTACCATCACC  
TATGGGGAATTCATCTTTCGCTGCAATAGATACGCACATTATCCACTCCGAAGGAGTAGAGCGATGCCAAC  
AAGTGTCTACCGTAGATATAACACTACCATCTAAAGACAATGTGGTGCTACGTCCCCTTCCA  
CAAAAT  
TCGCCAATCGAGCGGGAATATACTGTTTCAAGCTGCATGACGAGAGAAAACCTACGCCTGTATTTTCCTC  
TGCGGGCTCTAGAGTAAGCATCGCAGCTTTTCCAAAATGCACTCCCACCCCGGAATAGCATACTTACGC  
TTTAACTGTTCTCTGAGCTCGACCTAACATGCAAAACCCTGACAAAAGAGACCCGTATATTATCCTTTTTTT  
TTTTTAGCAAGCAAGCGATATCAAAAATTAATACTACCTAGTTCTAAACACTTGCTATCTCAAAAAATGT  
TTGTTGGTGGGGTCTCTTTCTTTTCTCTATAAAAATAGGCAATCGCTCCGATAACCGAA  
CAAACTGCAATC  
AGTAACAGAGGAGCATACCCAGCCTTGCATATACAGTATGATAACTGTAAAGAGGGACGGAAA  
CTTGG  
GTACTCCTGTAGAAACTGGGCAAGTTCTCGATTCCAGGGAAGTATGCCGACAATTC  
TACC  
CAAA  
GAATC  
CACTGCAGCAGAAA  
CTCCTGTGTGACAGGCGGAATACAAGGTATACCAACTCTTGATTACGTAACATG  
CCATGATAAAAATGTACTAGAGGCAGCCTTGAACGCGGATACCAACCGTCATTAGTAAGATTTACTAAA



TATCGGCTTGTTGCCTTTTGTAAAGGGCGAATTGCATACC CAAA TGTCTCCTCATAA CAAATAGAGATCCC  
AGCTTTTATTTCGCTCTGTTATATTCACAACCTCCA GAAA ACTCTCCTGG CAAACGTT GAAAGGGGAAGAGCA  
AATTCTGGGAAA AAGGTTTGACACAAG GAAAAACCTATTTTCCTCCAGGGATGTACTCACCTCCAGGAA  
CAAGAATCCGCTTATCATAGCTAGTTA TTTCCCTTCTCGGATACGCATTAGCAGCATTATA CAAATG  
CAGTATTCCTCC TTTATTTTCCATCGTTCATTTCCATGATAACGGTGCATTGATAACGTTTCAGCTATC  
GCTTGATCCAATC CAAATTTGT GAAA AACTCGCCCCAAGATTTGTTAGGAAG CAAAC TTTCTAATACAG  
GCTGATTTTCATGAAGAGTATAGGCTTGTCTATGTAAGC CAAAAGGAACACTTACTTCTGGGAAAACGAT  
CACATCTACAGGAGTTTGAATAGTCTGGCA CAAA GAAA CAAA CCTCTC CAAA TAGCACTAGCCATCCTC  
CCTGCATGCATATGAGGACTATATCCAGGCTGCACGATGGCAACTCGAAGCACTTCAGAGTCG GAAA AAT  
GCTTC TTTAGGTATTCGTAATGCGCTCCGCTAACAGATAAGGGAACGCGCACAACGTCAACCA TAAACC  
TTTGGAAA AAGAGTGT TTTAAT TAAA CATGCTG CAAA ACAGCATATATTGGCAGCAATAACTAGAAA GCTC  
TGTCAGCCCATC CAAA AAGCTGCCGAATTGCCGGCCATAGGCTGTCGCTGTAAGAGGCCAGCCAATAA  
AAT CAAA GAAA CTCT GAAA GCAACCATAATAGCGTATTGCTTCTATCGCCACC CAAACCCCTGGAAG  
C CAAA CAAGAGCTCCCTATATTGCTTGGCACAACACCACACAAC CAAA CAAGAAA AACTAG CAAA TAGG  
GTGGCGAGATAA GAAA GCAGTATACCC CAAACAAA ATAGATGCTTGTCCCTACA TAAA GATCTTCAAGCA  
TCCAAGA GAAATGAGCGCCTTCGACAGTCCAAGTC CAAATAAA AGCGATGCAC CAAAC TTTCTTCCAAGA  
TAATTGCTCTAC TAAAG CAAA AAGCCAGCC CAAA GTAAGCTGTAACCG CAAA TACAATAACAACAGAA  
GCTACAACACTTACATCCGGCTGAGC CAAA CAGACCAGCACCCAA GAAAGGATGATGTATGACACAGGTT  
TAAACAC TAAAGGGACTCCCTTACTAGCTTACATTCAGATGAGA GAAA AAGAATCCCTTAGAAGTTAC  
TTAAA GTTTAAGCG CAAAGCTCTTCTCTGGTCTGCTTCCC TAAA CCGGCGTATTTCTTCTGAC TTTCA  
GGGATTAACCTGGAAC TCCACAGGGGAATTGTT TTTGTCTACCGCAAC GAAAAG TAAAGTATGCTGAGG  
TGATATGGCGATGTTCCCTGCTTA TAAA TATTTCTGCCAGACT TTTACGCCACTTCT TAAA GAGGTTCT  
CCAAGACCGATTACGGAAGCGCAG CAAAT CAAAT TTTTCGCCATATAAGCAGGAGCATAAAAACGCATA  
GCATCTA CAAAAGCAGTTACACAAA TACTTTTC GCAATGCCGTTCCGGCAACCACTAATGCCAATCGATCCA  
ACAGGCTCATCAATAGCCAC CAAA GATCGTGTATTTCGTA TTTAAGTCGTTAGGGAATAT TTTA TAGAT  
GTGATCGGTTATACAGCTGGCAGAAA CTTTTTCT TTTATCTTCTTTTATTATCCTTCCCTCATACACC  
TTCTATATGAGTCTAATAGCCTCTATCTTGACTAGTCTCAGAGT TAAAGGCCACCTCTACTCCCAGTC  
ATCTCTGTAATGGATAGTAGTCTCGGTATAGAAGAAAATCAAGAAA TTCCTTGGAGGATTACAATCC TAA  
AATGGGTTGTTTG CCTGAG CAAA TCCGGTACCCTT TTTCCGTGATTTGATCTCACTACGGATAGAAA  
AGTAGATCTTGGT CAAA ATCCATT TTTGAAGCCACAGTAGATATCTAATGGAATATCTGTAAA CAACC  
ACCC TTTATACTTCCCTAACGGCATGTATTTTCAT TTTAATAGGCTTAGACAAA ATGTGTGTCACCTGCGA  
CAGCGTACGGAACCGCTTAGTTAAGTG TTTGAATACCTAACATTCATTTTC CACATC TTTCATAGCTCGA  
TGATTTTCCTTGATGAGGAACATT GAAA TGCCTTGC TAAAGCTTC TAAAGAATTATTCGGACTATCTCCAT  
ACTCTTTAGCTAGACG CAAAGTATCTATCACATAATGATGCTTAGGAAGCAGAG TTTCCCT TAAA CGTTC  
GCTTTCTGTTGGAAA GAACTTGTAGAT CAAATCCTACATGGTGCCGACGATATGATCTC TTTCT TAAAG  
AAA CTTAATTCTAGAGAACACCTCAC CAAAC TTTG GCTTATCCCTAACATGGCATCAGAAA TCTTAT  
GAATCT TTTGAGATCTGCT GAAA CAGCTCGCTCCGGATGAATAA GAAACTCTACTGAATCAATAA TTTTC  
AT CAAA TG TAAA CCGGATTGCAG CAAA TCAATCAGCGATCCTTT TTTACATCCAATCCCGTTG TTTCA  
CAATC TAAACAAA CGAACTCAACATCCTTCAATAGTACCACGCGCTAATCGTTCTCCA TAAAAAAGCTCA  
AATCACAACCGTCTGTGACTCCTATACTTACTTCTC TTTGTGCATCCGTAAGCGAGCGCATCTGCACACA  
AACACT TTTGCGGAATTGTGGAAG CAAA TTCACGGCTTCTGGCCATTCGACA CAAA TAAGATCTTCTTCC  
TCTGCGTCTTG GAAA AGATCTGCTCCGTTCCATAATATCCATCGTCTCAAGACGATA CAAATCATAATGGC  
AAA CTTCTGCGCCCACCTGCTTCA TAAA CATGAAG CAAAGC GAAA GAGGGGCTAGCCACCTGATCGACAGC  
TGCTCCCT TAAA AACCTTGAACGATCCCTCTAA CAAACTCTGTC TTTCTGAGCCGTAGTCCCCTGAT  
AATAAA ACAACCATAACCAGGAGTTAGGTCCCAGCAACCCTAGTAGCTAGGTCTATAGTCTCTTACACG  
AGTGAGTTACTCTTCTGTATCTACCCATTGGCTAATGTACTTAT GAAA CGCTGTGTCATCCGCAAGGCTT  
TCGA CAAACTCAGCGATCT TTTCTCCTC TAAA GCAT TTTGTAATAGAGT CAAA AATGAGC TTTCTAATT  
GGAACTTATTCTGAT TTTGTACTTCTTCGAGAGTCATAGGACGTAAGTAAGAAGT TTTAAA ATCTCCAA  
GAGAGTTGG TAAA CTGTGGAACAACCTCCCTGTTACTGCAGAAGCATAGACAGTCTTAATGATTGGTTCC  
TTTG CCGGAACAATATAGGCTCTGATCACTTCAGGATCATCGGATAC TAAAAAACG TTTGACAGCTACAC  
CACTCTGACGCTCTCTATTCTGAGGGCAAGAA GAAA GCCAGTCA TAAA TAGCATCCTGAGGG TTTGCGTA  
GACGTTATCAG CAAA AACCTTCCCAG TAAACGGACAAA TGTAAA TACGC TTTGTCTGCTCATTACCTCT  
GGCTTACCAGAA GAAATTTGAATCTCTG TTTCTCTCCAGATCTTCTTGTCCGCTCTAACAACTGAATCG

CATCTTCTGTGCTTTTAAAAATGATTTTATCCCGAACAAAAACAACCGGACTCAAGCGCAAAAGACTGCTC  
TAAATAAAACAAGTACGTTGCTAACAATTCTGGGGATTTTTGCTTTTCAAAAACCTGGAGAAGTTTTGT  
TTGATACTTCCAGAAATATTCATACTTATCCTTACTTTTTCAGTTGCTTAATGGCAAACTGATTCCTCT  
TTTAATCACCAGCCTCCTTCATAAGGGAAGCCTTTCGCCCCATATCCCTGTTCTCTACCTACTCTCACTT  
CCTTGCAAAAGTATTTTACAAAAGCAAAACAGGCCTAACCTCCCCATGCTCTAGGGGTAGGGGCATCC  
TGAATCGACTACATGCTATCATGATTTTCGTTAGGCACAAGCTCATTACGTTTTCATAAAGACTTTGA  
ATTCAAAAGAAAACCTTCTATGTCGAGCAAGAAAATCATTTCTCTAAAAGCCCTTCGTACTAAGGGCTCAA  
AAATTTTGTTCATATAGCCTTGTCCTTTAGGTTGTAAAAGAACTTAGGAGATGTTTTATAGCCA  
CAAAAGAACATTCGTTGAGCTTAACCTTTATATAAACAGCTTTCCTCTATACTGGCCTCTCATGCA  
GCTATGGCGAACCAGGTAGACGCGCTAGATTAGGTTCTAGTGAGCTTTTGCTCATGGAAGTTCAAGTCT  
TCTTAGCTGCAAACTTCTTTTCAAACAACGCCCCGGACAAGGGCATCTGTCTTGACTTTTCGTAGAGGT  
TATGGCTAACTGGCCTTTCAGAATACGGCTAGCCCCGTTTGCTTGCAGTTCTTAGGGAAGCCCTGAAACC  
TCCTAGCAAGGGTTTACATAGATTTTAAATTAGGAACAAGTTTATGGTCCAAGTTGTATCTCAAGAAAA  
CTTCGCTGATAGCATTGCTTCAGGACTAGTCCTTATCGATTTTTTGCTGAATGGTGTGGCCCTGTAA  
ATGCTGACCCCACTCTGAAGCTTTGGCAGCAGAACCTCCTCACGTCACTATCCATAAAGTGGATATTG  
ATTTCTCCCCTAGACCTGCAGAGCAATACAGTGTTCCTCTATCCCAACGCTGATCCTCTTTAAAGATGG  
AAAAGAAGTGGAGCGCAGCGTTGGACTCAAAGACAAGATTCTTTGATCAAGCTCATTTCCAAGCATCAG  
TAGATGCTCTCTCTAGAAAAGGCCGAGAAAATCTCGGCCTTAACATGATTCAAAATAATGTTTGT  
GTTTGCGGAGCGACTTCATACATAACTATCCCTACTGAAGTAGTAAATTCAGGGATCGAGTCCCTTCA  
ATCATAGGAATGTAATAACACTGAGACGAATAAGCATCCAAGACGGTCTGCGACAATCCTTTTGATTCTG  
CGCAAAAGATATAGGTCCCATCTAAAGGCAACTCTCTCTCCCCATAATAGGAGGAACCTTTGTAGTTAG  
ACAAAAAATGCGCTCTTTAGGCACCCCATAAAGAGCTTCTTCTAAAGAATCTACCACGGATAAAGAAAGC  
CGTTCCCAATAATCCATTCCGGCTCTCTTCAAAATTTATCTGCTAAAGAAAAACCTAAGGGCCGAACTA  
ATATAAGTTAGCCCCATAAGCCACACATGTCTACCAATATTCCCTGTATTCTGAGGGATATCTGGATT  
GTGAAGAACGATGCGCATAAAAAATCCTAACGACTATTCTGTAACAGATACATTATCGTCGTTTGCTTCA  
ATTAACCTCACTTCAAAAATGAGTAGAGAGTTTGAGGTAATTGTCCAGCTGTCCGTAAGCTAAAATCTG  
GATGTATGTAAAGAAGTTCGAACCTCTCCTTCTTTCATCCCTTGCATACCTTGGGAAATCCAGGAATTAC  
TTTGCTCAAAGGCAGTAAATGGGCTCTTTATTTCTTCTCTGAAGAATCAAAAACCTTCCCATCGATGAAG  
CTCCCTGTATAGTGAAGCAAAGCTGTAGGCTTCCCAAAAAGAACCCGTCTGTACCCTCTTTCACAACAC  
GGTACTGTAACCTATTAGGCTCTAACTCAATAACCCAGCCTTCTCTTTATTTTCTTTTAAGAATTCTTC  
TGCAGAAGCTAAATTTTCGAGCATTTTGCTTCAAAAAGTACTTCTGCCATTTGTTTTCA  
TATTCTGTATCTGTAAAGGAGCAGCTGTCCATCTATTTTCAGATTGCATCCCTTTAATCACTTCAACAA  
GATCTAACGAAAATCTTCCGTTCCGCTCAACTGACGAGCCAAATAAATGCCCAAAAGTTCTTGATAACTT  
TTGATTGTCTGTCAATGCAGAGTCTTCTACCATGCTTTTCTCCGTAGCCGATGTTTGCGAACCCGCTCCG  
TTATCACATCCTACGATAGGCAGAGCGACTGCAAAATAAGCATCCAACCTTAATATATTCTTCATTCGTT  
TCTTCTCAGTTGCACCTGATTTCTCAGATGTGCTTTTTGAAAACCGTTTCCTAGGTGAAAGACATCC  
ACCCTTATCACATGCTGTAAAAAAGCCCGTTTCCGACCTCTAGAGCAAAACGATATTATAGTT  
TCAACCCAGTTCTTTAATTGAATCGGCAAAATTTCTGAAGGTGCCGACATCATCAAACTCTCTGCTTT  
CTGTGTTTTAGGGAACGCAATCACTTCTCGAATAGTTTCCGCTCCTGTTAGAACCATCATAATACGATCT  
AATCCCAGAGCAATCCCATAATGTGGAGGAGTCCCAAACTCAACGCATCAATAAAACCCGAACCTCT  
CTTTTACACTTTCTTGCAGACAGCTTTAATAAAGCAAAATTTTATTTTGCAAACTGGATTATGTATACG  
CTGAGAACCAGAAGCAAATTCATAACCAATTAACACCAAAATCATAGCTCGATGAACGAACAGCAAAAGGA  
TCTGAGTCTAAAAGCGAGATATCCTCGTCTAATGGAGCTGTGAAAGGATGATGCTCTGGACATAACTCGC  
CTTCTCTTTTAGCAAAAGCGGGAAGTCCGTGATCCATAAAAATTATATTGCGTTGAATCAAAAAGTTG  
ACGCTCTTTTCGCAATCAACCTACGCAAAATGATCTAATGCCTGGTTAGCAACAGCCTCTGGAGCTGCTATT  
AACAAATAAATATCTTGGTCTTTTGCTTCAAAAGCTTCAAAATTTCTTTGGAATACGTCTTCCGAAGCGA  
ATTTGCAACATTAGACGATACACCCCGTCTTGTTTTTAATCCATACTAACCCCATAGATCCATAGCG  
CTTAACGAAATCTGTATAGATATCTAACTGCTTTCTAGACATATCTGCTCCGCCCCGAACAATACTCT  
TTAACTGTCCCACCGTGAGCTAATGATCTAAGAAAATCGAGAATGTGAATTTGCGTGCATATTCACAAC  
AATTTTGGAGGCGCAAGCCGAAACGTAATCTGGTTTGTTCCGTTCCATAGGAGTCTTAGCTTCTTGATA  
CGTCATCTCAGGAAAGGTGCCTTTAATCAATCCCCTTTCACAGCAATAAAACGTGTAACAAGCTCTTCT  
ACCCTGAAAAGAGATCCTCTGGCCACCAAAAGCTCATTTCCATATCGATCTGTGTAAACTCAGGTTGAC  
GGTCCGCACGCAAACTTTCATCACGGAACAGGTCGCTATTTGGAAATACCGATCCAAACCTCCAACCAT

CAAAAATTTGTTTAAA CAACTGTGGAGACTGTGGAAGAGCATAAA AATTCCTGGATAGATACGGGAAGGG  
ACTAAGTAGTCTCTTGCTCCTTCCGGAGTAGATTTTCCTAAGATAGGCGTAACTACCTCTGTAAAACCTT  
GTTTCATC CAAA TACTGTCTGCAAGCTAACATAAC TTTATGTCCGCACATTAATCTGTCCAAAATATCGCC  
ACGGCGCATATC TAAA TAGCGATAAGTTAACCGCAGTTCTTCG TTTA CATTAAATGTGTTTCATCA GAAATG  
GAAA AAGGAAGATTCTGTGCCCGAGACAACACTTCCAAGGAA GAAA CCTCTACCTCAATAGAACCTGTAA  
C CAAA TTCGGGTTCTCCATCCCCTCTAACCGAGCA CAAA CAAGTCCCTCCACA CAAA GCACCCACTCTGA  
ACGGACTTGATCCATAAGCTGATGAAGTTCTGGGT TTTCTCTTGCCGACACACTATCTGAGTAATCCCA  
AAGCGATCTCG CAAA TCAAT GAAA ACAACTCCCCATGGTTACGGTAACGATGCACCCACCCAGA CAAAC  
GAACATGTTCCCCACATGATCAAGGGACAACCTCATTACATTTA TGC GTTCTGTACTTCA TAAA CCAACC  
TTTG TTCTACATCTTGTGAGCCCCGTGAGAAGCTTTGATG CAAA GACATATC TTTA ACTATAAAA TTGTTT  
CGTTGCTAATTCTTGTTCGCCTAAGAGA CAAACAAA ACTGACTTGTGATCGGCAGCATCTTTAAGAGAC  
AATTTAAGGCTTCTTATGGCTCCAATCTACTTCTGTGCAATGCC TAGGTTACG TAAA CGATTTGCCATG  
AAAAA CAAA ATGCATCTGCCTGCTCATCCATAGGAATTAATCGCAACCGTCGCGTAGAGGTGCGA TAAA GA  
GTTTC CTTGCTCTAATAGCGTTTG GATTACTC TTTT CAATCCCCTC CAAAAC CAAA AGCTGGCATAGAA  
GGCCTCCAGACTGCGCAACCAATTCATCATAACGCCCGCCGCTCCCAATGCATAGGAGCGCTCTCCCA  
CAACAGTCACCGCTT CAAA TACAAGATCCGTATAATAATCCAACCCTCGAACTAGCCTTGATTGATTGC  
AAAAGGAATCCC TAAA GCC TTTA ATTGGGCTAATACTGCAT CAAA ATAGCT TAAA TCCCGATCATCTATG  
TAATC CAAA ATTGAGGGAGCTTTTC AATGAATTCCTGGTCTTCTGGCTCCTTAGAATCTAATATACGCA  
ATAAGTTCGCATGATATC TTTT TTAGCTCAGAGGCGATAACCGGTCTAGATCCTTACGGAAGAACTCCCG  
CAAA GCTTCGTCATAACGAGCCCGAGTCT TTTG CCTTCC TAAA AAAATTCACATGGA TTTG CATATGCTGA  
AGCCCGACCGCTGCA TAAA AATCCATAACAGAGAGACCTCCGCATCTCGTAAGGGGTGCCGCACAC  
CGATAGCTTCTAGACCGAACTGATGATGCTGACGGTAACGTCCAGATTGTTGCCGCTCGTAAC GAAA CAT  
GGG CAAA ATATAA TAAA ACTTATTATC TTTG CGCATATCAGCAGAATGATCCAACAATGCACGAACAAC  
GCTGCAGTCCCTTCTGAGCG CAAA GT CAAA GAACGTCCCTTT TTTA TCTAAGAAGTA TAAA CTTCTTTT  
TTACAATATCACTGTGTTCTCCGACGCG TAAA AAAAGTCTCTGTCT TTTT CAAA AACTGGAGTTCGGATCTC  
AT CAAA TCCATATAA TTA CAAA TACGATGGGCTGCATGCTCAACACGTTTC CATAGAGAAGAA TTTCTC  
CAAA GATTT TTTG GGCTTGTACATAGG GAAA AATAT CAAA AACGCCT TTTG GCAATGCATTACTCATTG  
TGTATAACCGGACTATTTCTCAC GAAA AATGTTTC GTGATCTCACCTT TTTAAA GTTCTTTTT TTTG CGCAA  
AGAACGAGACCACTATGTTACAC CAAA AGAGTTTTC AGGACTACTC GAAA ACCTGCTCCTTTTCTCTA  
TTA TTTCT TTTATTTG ACACACCTTACTCTCCGCTTATCCATCCACAATATGCCGCATCCTCACCCCTAC  
TCCCTCTC TTTA CACAG CAAA TGTATTGTCTTC TAAA AGCTATTAAGC TAAAT GAAA GAAGTGTGACGA  
CATTACTACAATTGTCCAATATGATGCCGGGCTGGTCTAGCCTAGACTGATAG CAAA AAACGAGGTCTT  
AGAAGCTGATAC TTTCTGTCTCAGTATGCATTTGTATT TTTCT TTAAGCTTCTAGAG CAAA CACACTTGAAT  
CGAGCTAACACCTATGAATCTATGGAC CAAA ATT TTTC AGCCTCCTTGCCACAT TAAAGAAA TCAGTGGC  
CCGGAGTTGGT TAAA AAGCAGTACAAGTACTGGAGAGTGCATCTTCTACAGCATGTTCTTAGGGTACG  
TGTTCTTCTAC TTTA CAAG GAAA AGC TTTACT TTTG CCATGCCAACCTTGATCGCTGATCTCGGG TTTGA  
TAAA GCTCAGCTAGGGATTATCGGTAGTACTCTCTATATCACTTACGGCATTAG TAAATTTG TAAGCGGT  
GTCATGCTGACCAGTCCAATCCTCGCTA TTTT CATGGCTATTGGATTGATTATTACTGGTATCTCTAACA  
TCTTCT TTTG GTCTCTCTTCTACAATCCCTCTG TTTG TATTGTTCTGGGAATTAACGGTTGGTCCAAGG  
ATGGGGGTGGCCTCCATGCGCACGATTGTTAACTCACTGGTATTC CAAA TCAGAGAGAGGAACCTGGTGG  
AGCG TTTG GAGCACTTCTCATAATATAGGGGGAGCGTTGATCCCTGTTCTTACCGGAGTTGCTATTGACT  
ACACGGGGTGGCGCGGCGTTATG TTTA TCCCAGGGATTA TTTG TATTATCATGGGA TTTA TCTTAATCGA  
TCG TTTG CGAGACACTCCGCAATCACTCGGGCTCCCCGCTATA GAAA AATTTAGAAA AGAAGAGGATGCG  
CATCCACATGAA GAAA CAACTGCAGATATCTTAGAGGAAGAGGCAGAAA GAGAGCTCTCTA CAAA A GAAA  
TCTTG TTTA CTTACGTA CTATCTAA TAAATGGCTATGG TTTCTGTCT TTTG CCTCCTTC TTTATTTATGT  
GGTTCGCATGGCAG TAAATGATTGGAGCGCTCTCTATCTAATC GAAACAAA AGATTATTCCACAGTAAA  
G CAAA TCTCTGCGTATC TTTGTTT GAAA TTGGCGGATTA TTTG GTATGCTATTAGCGGGCTGGCTATCCG  
ACACGATTTCCAAA G GAAA ACGTGGACCAATGAACGTAGTCTTCTCGCTAGGATTATTAGTTTC CATCTT  
GGGATTATGGGGTACTCGTGATTACTTCG TTTG GTGGATAGATGGAACATTCCTA TTTATCATTTGGTTTT  
TTCCTTT TTTG GACCA CAAA TGATGATTGGATTGGCAGCTGCAGAATTGTCTCA TAAA AAAGCAGCTGGAA  
CGGCTAGCGGC TTTA CAGGATGGTTCGCCTACTTCGGAGCAGC TTTT GCCGGATATCC TTTA AGGGAAGGT  
GGCTCAGGATTGGGGCTGGCACGGATTC TTTG TTGCGCTCTTAGCTTGTGC TTTG ATTGCGCTGATCCTT  
TTC TTGCCAACATGGAATGCATCCGAACAGAG TTTG A GAAA ACATAGTCACTAAGTGAAGAGCTGT TTTG

ACCTGGATTCCATTACATTGCCACTCTCAGTATTCCATCTTGATGCAACATGCTCAATCAAGAAGTTTG  
TTGC CAAAGCAGTGAATAT CAAA TTCCCGCGCTCGCTCTTACCGATCACGGGAA TTTGTTTG GCGCGGT  
CGAAT TTTATAAGACCTG TAAACAAA ACGCGAT TAAA CCTATCATCGGGTGTGAGCTATACGTGCGACCC  
TCTTCTCG TTTTGA TAAAAAAAAGAAC GAAAAAGCCGAGTTGCCAACCATCTCATCCTTC TTTGTAAAG  
ATGAAGAAGGGTATCGCAACC TTTGTTTG CTCTCCTCTCTTGCTTACACAGAAGGTT TTTACTATGTGCC  
TCGCATAGATAGAGATCT TTTGAGCCAACACTC CAAA GGACTTATCTGCTTATCAGCCTGTTTA TCCGGA  
TCGGTTGCTCAAGCTGCATTGGAATCTGAAGAAGA TTTAGAAA AAGATCTTTTA TGGTATCAAGATCTGT  
TTCAAGAAGACTTTTTCAGTGAAGTACAACCTCCA CAAATCCTCAGAA GAAAAAGTTGCTCTATTTG AAGA  
AGCTTGGT TAAAA CAAA ACTACTATCAATTCATTGAGAAA CAACT CAAAGTAAA TGAAGCTGT TTTA GCT  
ACTTC TAAACGCTTGGTATTCCCTCAGTTGCTA CAAA TGATATTCACTATTTGAATCCGGACGATTGGC  
TCGCTCATGAAGT TTTACTCAATGTTCACTAGAGAGCCTATTCGGACAGC TAAACAAAATACTTACAT  
TCCCAATCC TAAACG CAAA ACCTATCCTAGTAGGGAAT TTTAT TTTAAA TCCCTCAAGAGATGGCAGAG  
CTATTTG CAGCACATCCAGAGACTATTACCAATACGTGTATCGTTGCCGAGCGCTGCCACCTAGAGCTTG  
ATTTTGAAA CAAA CACTATCCTATCTACGTCCAGAAGCTTTTACAAA AAAAAAGGATCCTACACAGAAGA  
GGAGCGCTA CAAA GCATCCTCAGCCTTCTTAGAAGAAC TTTGCGAGCAAGGATTAACCAG CAAA TACACA  
CCCGAGCTTCTAGGACACATTG CAAAGAAAT TCCCTGGGGAAGACCTCTTACGCTGGT TAAAGAACGTC  
T CAAA TTGGAATCCTCTATTAT TATCTC CAAA GGGATGTGCGATTACTTGTCTATTGTCTGGGATATTAT  
TAACTGGG CAAA AGATCATGGGATTCCTGTTGGCCCCGGTCGAGGCTCTGGAGCGGGCTCTGTCTATGCT  
TTCTCTTCTGGGGATTACT GAAA TAGAACCGATTGCTTTCGACCT TTTCTTCGAACG TTTTATCAACCCGG  
AACGGATATCGTATCCCGATATCGATATCGATATCTGTATGATTGGCAGAGAGCGGTTATTAACCTATGC  
TATAGAACGTCATGG TAAAGATAATGTAGCC CAAA TTATTACAT TTTGGCACCAT GAAAGC CAAAATGGCT  
ATTAAGGATGTGGGTAGAAC TTTA GATACCCCTTAGC TAAAGTGAAC TTTTATCGC GAAA CATATTCCTG  
ATCTTAATGCTACCATTACTTCGGCATTAGAGGCTGATCCAGAAT TAAAGCAACTATATGTAGATGACGC  
TGAAGCTGCAGAAGTTATTGATATGGC TAAAAAACTAGAGGGATCTATCCGCAATACTGGAGTGCATGCT  
GCGGGAGTGATTATCTGTGGAGATCCTCTCACTAACCATATCCCGA TTTGTGTCCC TAAAGACTCATCCA  
TGATTTCTACTCAGTACTCAATGAAGCCAGTAGAAA GCGTTGGCATGCT TAAAGTGGATTT TTTGGTCT  
AAA AACCCTAACCGGCATTACATCGCCACACAGGCGATCTA TAAA AAAACAGGCATTCTACTCCGGGCT  
GCCACGATTCCTCTAGATGACCAGAATAC TTTCTCTCTTTCATCAAGG TAAA ACCATGGGGATCTTCC  
AAA TGGAATCTCGTGGCATGCAAGACCTTGT TAAA AACTTACGCCCAGATGCG TTTGAAGAAA TTATAGC  
GATCGGAGCCCTCTATCGCCCTGGCCCTATGGATATGATCCCATCA TTTATCAATAGGAAGCATGG TAAA  
GAGAATATTGAATACGACCATCCTCTCATGGAACCTATTCT TAAA A GAAACT TTTG GAATTATGG TTTACC  
AAGAACAAGTCATGCAGATTGCCGTTTATTAG CAAA AACTCT TTTGGGAGAAGGGGATGT TTTACGCCG  
CGCTATGGG GAAA AAAGACCATGAACAGATGGTCAAGGAACGAGAGAAA TTTG TTTCAAGAGCCGACGG  
AATGGCATCGACCC TTTCCATAGCAACGACTATCTTCGATAAGATG GAAA AGTTTG CTTCCTATGGATTTA  
ATAAGTCCCATGCCGACGTTACGGTCTTATAACCTACACAACAGCATATCT TAAA GCCAACTACCC CAA  
AGAATGGCTTGCCGCCCTTCTCACTTGGCATTATGACGATATTGA GAAA GTCGGGAAGCTAATTCAAGAA  
GCTCACAGCATGAACATTTCTGTTCTGCCTCCTGATATTAATGAGTCTGGACAAGAT TTTGAAGCCACTC  
AGGAAGGGATTGCT TTTCTCTAGGAGCTGT CAAA GCGGTTGGAATGAGCATTGTGGATAGTATTGTTGA  
AGAGAGA GAAAAAAACGGCCCTA TAAA AGTCTGCAGGA TTTCTGTTCAACGCGCAGAT TTTAAA AAAGTC  
ACTAA GAAACAGCTT GAAA ATTTG GTGGATGCAGGAACC TTTG ACTGCTTCGAACCTAATAAA GATCTTG  
CGCTGGCTATCCTTAATGACC TTTA CGACACGTTCTCTAGAGAAA AAAAAAGAAGCTGCTACAGGAGTCTT  
AACCTTTT TTTCACTAGATAGCATGGCTAGAGATCCTGT TAAA ATTACTGTCTCTCCT GAAA ATGTTATC  
CAACGCTCTCCTAAGGAGTTGTT GAAA AGAGAAA AAGAATTACTTGGAGTATA TTTG ACTGCCCATCCTA  
TGGATGCTGTTGAACACATGCTCCC TTTCTTATCTGTAGTCCCAGCTCGAGAT TTTGAAGGACTCCCTCA  
TGGAACCATATTTCGTACAGTC TTTCTAATCGA TAAAGTCACTAC TAAA ATTTCTCTGCAGAGCAGAAA  
AAA TTTGCACT TTTA CAAGTCAGCGATGAAGTCGATTCATATGAAC TTTCAATCTGGGCCGATATGTACG  
CCGAATACCATGATCTATTGGAAGAAGATCGTCTTA TTTATGCCAT TTTGGCTATAGATCGACGTAGTGA  
TTCTTGGCTATCTTGTGCGGTGGATGCGAGACTTATCTACCGTTAATGATTCAGTAATTGCGGAATGC  
GACGAAGTCTATGATCGACT GAAA AGTCA GAAA GTATACTCTTCAAC GAAAAAATCAACCGGAGCCAGT  
CCTCAGCAATGA TAAAGAAAGTAGAAA CTAGAGAGATCTCTCCCGTAACCATCTC TTTAGA TTTAAATAA  
ATTACGCCATAGCCACTTATTTA TTCT CAAA GGGCTGATACG CAAA TATTCTGGATCTCAAGCACTCTCT  
CTTGTATTCA CAAA AGATAATCAGCGGTTGCTCTATCTCTCCAGATGCAGATTT TTTCTGTAACAGATG  
ATATCTCTTCTTCTTCAAGAAA TTGAAGCAACCAATATCCCTGCTCGGTTCTAGCCACTACAGTATA

ACTA TTTAAAAGTGAGATGCTCCCCTC TTTGGTAAGATCTCTACATAAGTCTCTTGCC TTTAACGCAC TT  
TGTCGTGGCGATCCAGACAATGGTCTCC TAAATCCTATACCCGAC TAAAAAAT TTTGAGGCTCTCTAGCA  
AACGAAGGCGGAGCTACTCCACCTTCA TTTCAAGAGAGATCTAT GAAAAAAGCTATGCGCGGAAG GAAAA  
AGAAA AAAAGAGGTCTGTGCTA TTTG CAGTATGTAGGAGC GAAA TC GAAAGG TTTCCCTGTAATAGCATT  
AATATACTCAACACGAACACTACTATCCGAAGCTGCAATAGAAA CCTTATATACCGGAACGTGAATCTGT  
TCAGAACT CAAAA TAAAGAAA TTATCGC CAAAAATCA TTTCCACAAGAT TTTG AATACGATCCTCTGGAT  
ATACCACGGAACATACCGTAGATCC TTTCCGGT TTTG CTAAC CAAA CAGGAGATGAATTGAATACAGTCAT  
GCATCCCTTAATTGGCTGAGGCTGCTG GAAATGACTG TAAAT CAAA TTATCATGAG TAAATATTA TTTCC  
TTCTTCTGACATGCACGAATCACACGATCGGCACGAACATTACGCATAGACAATGCTTGT GAAA GAAC TT  
CTCTCGATGCAGATCCTCCCATAACCAGC TAAAACTGCATAAGCTGCACATCTTG TTTCCCTGCT TTTAA  
CATGAGGCATTCTC TAAA TCC TTTA GAGTATGTCCAAGATCCAGTATTCAACACCATCTCTCCATTAGAC  
AAA CTC CAAAGCATAGCTCCTTCGTGACTTCCAGCAGC TTTA TCTTCTTCCCC GAAA AACGTACACGCA  
TAAGGACATGAGGAA CAAATAACAATTCTGCAGACGC TTTGTC TTTGG CAAA CATGGCTAAGACCTGTTC  
TTCCGATACACGTC TTTCAAATACGCATAAGCGCTCATTACCT GAAATCTTACGAACTAATTGAGA ACTT  
TTTTCAACGAGTTCGATTCCGTAATCCATAGCAAA TTG TTTGATTCTATGTGAATAAGGGATCTTATCCC  
AAAACACAATAGAAC TAAAAATAGCCGCAATAAAAACAAC TTTCTTCATAACCCAACCTT TTTATTTATT  
TTAA TAAATAAAAACAGCGATGC CAAATAAA TTTT TTTGTT TTTGC TAAACAAA AGCTATAAGAGAT TTTG  
ACAAA TTCTCTT TTTCTTT TTTATGATGACGC TTTG TTATTATTGTCCCTGCGCTAGCTAT GAAA GTCA  
TTTTAAGAGCGC TTTGCTTTGTTTCTTGTGTTGCCCTGCGGATGTTATGCGCGAGTGCCCTCT TTTGAACC  
TTTCCGAGGCGCTATCGCCCCAAA CCGGTACATTC TAAA CATTC CCCAGA ACTCTA TTTCC GAGATGGGA  
GATAAA TAC TTTCCAGC TAAAAAA TTTAAGCAAGCTCTTCTTTG TTTTGAATGATAACACATCA TTTCC  
CAGAACATGCTCTTCATCC TAAAGCACAG TTTCTTGTAGGGCTCTGCTATCTT GAAA TGGGCCATCCTGA  
CTTAGCGGA TAAAGCGCTA ACTCAATATCAAGAGCTCGCCGATACAGAATATTCTGAACAATTATTGCGC  
ATTAAGTATTCTATCGCA CAAAG TTTCCGCTAACG GAAAGCG TAAA AATATCGTTCC TTTTGAAGGG TTTCC  
CTAAGTTGTT GAAAGCAGATACAGATGCTCTGCGTATT TTTG AAGAAA TTGTGACAGCATCTTCCGACGC  
AGACCT CAAAGCTTCTGCTCTCTACG CAAAGGTGCTCT TTTG TTCGACC GAAA AGAATATTGCGAAGCG  
AT CAAA ACTC TAAAAAAAG TTTCTCTTCAG TTTCTTTCACACTCTCT TTTCTCCAGAGTCTTTTA CCCTTA  
TTG CAAA AATCCATTGCTTACAAGC TTTG CAAGAGCCCTATAATGAACAGTATCTTCAAGATGCTCGGAT  
GAATGCAGCAGC TTTACG TAAA CAACACCCTAATCATCCTAGCAATACAGAAGTAGAGA ACTATATTCAT  
CACATGTGCGAAGCTTACGCTTCTTGTATATTTCAACCGACGCT TTTATGAG GAAA AAGC GAAA AGCCT  
CTTCTG CAAAAA TTTA TTA CTCAATAGCTCTAGAAA ACTTCCCTGATACCTCCTATGTCGC TAAA TGCAA  
TAAA CGATTAGAACGGCTCTCT TAAACAAATGAGTTAAGCGAAC CAAAGG GAAA CTCTTGCATGCT GAAA  
ATGT TTTG GTTGAATAGCCTCGT TTTCTTCTCGTTACTACTATCAGCCTGCGGCTATACAGTGCTCTCCC  
CCC ACTATGTA GAAA GAAAT TCTCGC TTTCCGAAGGCATCTATGCTGCCCCTATCGAAGGAGATTCATT  
AGGAGATCTCGTATCCTCTCT TTTCTTACGAATTA GAAA AGC GAGGACTCCACACACGATCTCAAGGAACC  
TCTTCTGGTTATGTA CT CAAA GTCTCTCT TTTCAATGAGACTGAT GAAA ATATTGGATTTCGCATACACTC  
CC CAAA AACCTGAT GAAAAACCTG TAAA ACACCTTATTGTCTCTAATGAAGGGCGCTTAGCGTTATCAGC  
AAAAGTCCA ACTAAT CAAA AACCGCACACAA GAAA TATTAGTGGAGAAA TGTCTGAGAAAATCGGTTACT  
TTTGAT TTTCAACCTGACCTCGGAACCGCAATGCTCATCAGCTAGCTCTCGGACAA TTTGAAA TGCATA  
ATGAAGCAATAAA AAGCGCTTCTCGTATATTGTATTGCAATTAGCAGAGACTATTGTACAACAGGTATA  
CTATGACCT TTTCTGAAGGAGAGCAAGT TTTCCAGCAACATTACAAGATC TTTATCCTATGCTCGAT TT  
TGT CAAA CGAGCAGGCGTCCACTGTAACGTACTCAGAAAAACTATCGAAGCTAGAGCTTGTGTGAA  
GAACTTCTCT TAAA TATTATCACCCATGCCTA TAAA GGGCTTCC TCCACAGGATGGATCCGTAATCT TT  
GCACA GAAA ACTCCAGATGCTCT TTTAGTTCCGGATCACAGATCATGGCCCAGCC TTTAATCCCATAACCGC  
TTCGCCAGACATCATGCGCCTGGATCTACCTATTGAG CAAA GAAGAATTGGTGGACTAGGGATA TTTCTA  
G CAAA AACTCGGTGGATGTT TTTG ATTATGAGAGAGTTAACGACA CAAATGTTGTCACTCTCACTCTAT  
ACACA AAACCTCACAACCTCATAGTCTAATCTATCCATCTATTGAAGGCGGGCGTAATGCCCGTAATTCTT  
TTTCTGTATCCTGGATATCACA CAAA TATCTTTCGCAACGCCTCTAAGAT TAAA ACTCGAATTATTATAC TT  
TCCTGATGCTT CAAA AGCTAATTCAGGAGAGA ACTCTTACCCTGG TTTAAA GCGATGTAGCCGCGAGTA  
ATTGCC TACCATCAACTAATGTAGGTACCAACCACACAG CAAA TTTGTGT TAAATAAAGTGAG TTTAT  
CTGAAGATTCTGATACGATGAAGTCATTAACAGCACTGTCAGCAAGTTCCCTCAGCCT TAAAATC TAAAGC  
CGAACGAGCTAAGACATCAGATATATCCA GAAA GCCTTCTGGAAA AGCTGTGTTGTGATTGGTAATTGAG  
CGACG GAAA AAATCCTC TAAAAAATC TAAACTCACTGCCGTTTCTCC TTTCTCAAGGGTAA TTTG TTATT

GAAGGCACCGTCAAGAGCTTTTTTGATATTCATAAGTCGAAAATTCCTTAGAAAGCAGACCATCAGCAGGTT  
CCATGCGTACTTTTFTTCCTTGTTGTGTCGGTTCFTTAATCTGCTTGGCTCCCTTTTFTTCCTCTCGFTTCCTTT  
GTACGCAGATCCCCATACTGTTCTTACAAAAGGAATCGCAGCCGAGTCGTTTCATGCAGATTCCGGAGCA  
ATTCTGAAAGAAAATAATCTGGATCACAGATTFTTCCTGCAAGCATGACCAAGATTGCAACCGCFTTAC  
TCATTTTAAGGCAGTATCCTGATGTGTTAACTCGFTTCATCACTACTCGCAGAGAGCCACTGACTTCTAT  
CACTCCTCAGGCFAAACACAATCCGGATACCGAAGCCCTCCCATTGGCTAGAAACTGATGGTATGACT  
ATTCAACFAAAAAGTGAAGGAAGAGGTGTCTGGATGGGACCTTTFTTCACGCTCTACTTATTAGCTCTGCAA  
ATGATGCTGCCAATGTTTTAGCAGATGCCTGCTGCFAAAGCGTCTCTGCTTTTCATGCGCCAACTTAATGA  
GTTFTTGAGGGAACCTCGGTTGCFAAATACTCATTTTAATTCTCCTCATGGACTCCATCATCCTGATCAC  
TACACGACGGCTAGAGATCTATCACTCATCATGAAAGAAGCTTTAAAAGAGCCCTTTTTCGCAAGTCA  
TTCACACAGCGTCTATACCATGGAGGCCACCAACTTAAGTCCAGAAAGAGTTCTGTCTTCCACGAACAA  
ACTTCTTTCTTCTCTTTCGACTTACTTTTATCCACCTTGTTTAGGAGGGAACACAGGAATAAAAAGT  
GCAGGGAATAATATCATTTTCGCTGCAGAAAAGAACAATCGCTCAATTATTGTTGTAGCAGCAGGATATT  
TTGGCCCTGCTGCTCAACTATACCAAGATGCTATAGCTCTGTGCGAAGATCTATTTAATGAACAGCTATT  
ACGATGCTTTTAATCCCTCCCAGTCACTATCCTGTACCAACTCGATTTTGGCACGTGTGACAGCTCCG  
GTAGCACAAGGCATTTAATTACGACTTTTATCCTTCTGAAGGAGATCCCCTCTTAACCCFTTTCCTTAGAAC  
CCAATAAGATCTCTTTCCTCCATTCGFAAAGGAGATCTTCTAGGCCATTGGATTTTATCCACCCCTACTGG  
AGAGAATCAACATTCATCCCATTCCTAGCAGAGAGCGATATCCTCCCTACTTTAAAAGCAACGAATTTCTT  
TTAATGAGTCTTCGTATACTTACCACCTTATAGAAGTTACGTTCTTATCCTACTCTTTGTTTGGATCTATC  
GTAGAAAAAGCAACCTCGTGCAGAAAAACTTTTTCCTAACCCCTTTTTCCTTAACTCTCTATCTAAGA  
AATCTTTAGCGGACTTTTFTTCTGCTTTTFTCTAAGATTTTCGCGTTGTTAGAGAAAGTCTTTTFTTCCTGT  
CCCGTCTTTTCTCAAGAGCTTTTGTTCAGATTGCGTAAAAGGACTCCTATGTTCAAAAATCTTTTGTTC  
ACTTGTGCTGCTCTTTAGTCTTACCCCAACCGGGCTCTTCTCTGCTGCGCCCATCTCCGCACACCCATC  
TGTTACGAAAAGCTCTCATTGCGGCAACTATTCAAACGTTTCTTCCAGAAACCTCTCATAATAAAAAA  
GAGCGTACTACCAFTTTCFAAACATGTAAGTCATGCTCTCAAACGTCCTCCGAAATATGGAATGATTTTAC  
AAAATCTTCTCCTTATTCTCATGCAATTCGAGCAGTTTGGCAATCAAGAAGTAGTTCCTCGCCGTATGA  
AGAAAATCCFTTTCGFAAATAATAGAAAAGAAATTCATTTTCCTATTATCCGAGCAACAGGTTTCTGAACTT  
ACCGATATACTCGCTCCCAAACAGGAGACCTATGATTCCTTTTCGCTTCCATCATCTCTACATTTTGTCT  
CGATAGTTTATTCTCTTCCCCAATAGGAGAAAGCAACCGTGTAGCTGCGTACTTTAAAAGAGCATCCCTCT  
CTTGGCTCGAAGGACCGTCAATGGATCAATACTCGTATTTTTACCATCTTACGTCACCGCCGTTTGTAG  
AAGCTTTTGTCTTAGCAGAGGGGAAAGAAATCTCTGCAAAAATTAGTTGAAAAGGTGGAAGAGGGAGT  
CACCFAAATATTGAGCAATTTCAACACCTGCCTTGGCCTGTCTGCTACTCCATATCGGACGATCTAGCA  
GAGTGTAAACAACGGATTACGGCGAGGAAGAAGCTATCCGTCTAGCFAAATATTTTGAAGAAGCTC  
CTTGCTCCATTCGTGFAAATACTCGACGAATCTCTGTAGATAAACTCFAAAGGTTCTGCCFTTTCCTTG  
TCAAAGAGGCGGCTCCTTCTTCAATGCGTTTGTAAAACCGCTATCCTCTGCAACACACACGAGCATT  
CGCAGAGGGCTCTTTGAAATTCAGATGAATCCTCTCAAATCATCAAAATGCCATTCTAATFAAAGATT  
CCGATACTGTTTAGATTTCGTGCTGGGGCTGGAGGFAAAGCTTGATCTTTCACAAACGCGCTCGCCA  
CGTGACCTTACATGATAGCCGTCCGCAAGCCTTAGAGGAGGCTCGTCACCGCTCCCGCGATCAGGAAT  
AAAAATTTTACTATTCATCTCAACCTCTGAAAAAACACAGFTTCTCTAGTCGTGGTTGACGCTCCTT  
GCACTGGAAGTGGCGTCTCCGCGACATCCAGAAAAGAAAGCTTCTCTTCTCFAAACAACTCCTCCATAA  
CAATTCGATTGCTCAAGAAAAGATTTTAAAAGAAGCCTTAGCTTATGTCGCTCCACGCGGACGCTTGGA  
TACATCACCTGTTGCTTATGAAAGAAGAGAAACATAACCTCTTGGATGGCCTCCCAAGGATGGA  
AATGCGTGAAGAAGTGAATAATCCGCTAGTTTCCTGACAAGGGGATGCTTTTTCCTGCTCGCATTTTAT  
CCGATCTCGCTCGCTCTAGAATCTTGATCTTAAACCATCAGTGCAGGTAATAGGACGAGGGCTAACGG  
ACGFTTCTTCTAATTCATCTTTATTCFTTCCAAAAGACTTCTGTGACTTGGGAAGGATGATATAACCTC  
GTATAAGFAAAAATATCATTFTTATCATGCATAAGAAAACACAATCACATTCTCAFAAAGGACFTTTC  
AFTTGTCTATTGGAGGATCGATCTTTGCTATGTTCTTTGGAGCAGGCAATGTGGTATTCCCFTTAGCCT  
TAGGACACCACTTCTATTATCATAFTTCTTACGCTTGTGGGTATGATTCTGACAGCCGTAFTACGCC  
TTTATTAGGTCTGTTGCGATGATGCTGTAATCTGFAAATTACCGTTCATTCFTTGTCTTATTGGAAGA  
ATGCCTGGTATGGTGTGATGGTTGCAATTCATGCAATTATTGGCCFTTTCGGGGGAATTCCTAGAATA  
TTGCTGTGCTTACGATACGCTAGCCTCGTTGGGAGCAAAACATCCATTAATTTCTTCCCTACCTTG  
GTTTAGTGTCTTCTTTGCGTACTTGTTTACCTCTTCGTTTTCGCAAGCTCAGCAAGCTGATTCAATGGCTG  
GGGTCCGTTTTTTCCTGTCTATGTTAGGAACTTTAGCCTGGCTGATTATCAAAGGACTCCTACTGCCTG

CTCATGCACTTCCCTCAGAAAAGCGTAACCTTTTCGAAGCAACAAGCCTTTGTTACAGGACTTTTCGGAAGG  
TTTTAACACTATGGATTTATTAGGAGCCTTCTTCTGCTCCATAGTCCTTGATCAATTCAGCAACTT  
ATGGTGCAGCAGAAGCATGAGTCTTCTGAAGAAAACC TTAGAGTTTCACCATATTTGGGAAGACTGAGA  
AATACAAACTTGCTATGAGTTTTC TTTTAGCAGCCGCGCTACTTAGCCTTGATATCTAGGC TTTGCCTT  
CTGTGCTGCCCGTCATGCGGGAGCTCTGATAGATGTTCAAAGAGGGCAAATTTCTAGGAAGAA TTTCCGGCT  
CTTGAGTTGGCCCCAATAGCTTTTAAACAGGGCTGAGCGTCTTTTC TTGCTTGCCTAACCACTGCAATTG  
CAGTAACAGGGATTTTCGCGGATTTTATCGCGAGAGTCTGTTTC TTCTCAAAAATGAGTTACTCCAATGC  
TTTTAATCGTTACTTTGGTTTCTACATACCTAGTATCGATTCTTAGT TTTGAGAATATTAGCAAGATTCTC  
ATCCCAT TTTGGAAATGAGCTATCTGCACTCATAGCATTAACTTGCGGTGTTATTGCGAAGAAGC TTT  
GGGATTTTCGCCATGTGAAAAC TTTATTTTATCTTGTT TTTGCACTTACGATACTCTATAAGCTGTCCGT  
TTAATAGACTTAGTCGAATGTTTG AAGCCATCCCTTACTGAATAAGTAAGGGATGTTCTTTTGTCCGGA  
AAGCAACC CAAA AAAACGCC TTTAGAAGACACCTATCTACTCC TAAA CACTCGTTCC TTTCTGCC TAGGTC  
ATGCGCAAGCATGGGAACGTAACAGAGATTGATTCTTATGATTC TAAA TTCTTATCCATG TTTTCGTCAT  
CAGGCTACCCG TTTCTTACAAGATAATCGAGACTCCATAGCCG TTTCTTTTCTAAA AACACTTACAAAA  
TCACGATTCTGATGAAGACTCTCCGGATGGAGAATGGATCAGCACTCTATCATTCAACGATGAGGAGCG  
TTTGTCG TTTGCAGCTTGTAGCTGCCAGATGGAGACTGCTGCGAGCACCTCCTTACCGCTACCTTAGCA  
GCTTACGACCCAACAGAAGGAGCGCTTCTTCATGT GAAATTTGAATCCTCTT TTTGGTGGGGGTTAT TTT  
ATCAATTATTCTAAGTAAGGCTCCTCTACACGCCCGGGAGA CAAA GTCTATAACCATAACAATCCCAACA  
ACTTTTCAGTCTCTCTCCAATGCC TTTCTGCAGAAGCCTTAACTTATTGGCTGCCTATTGTGCACACCTCT  
CCAGAACCT CAAA CAATATCTAAAAGAAACATTCTCCAATCCGCATTATAACCGAATCGCACGAGA ACTAT  
TCATGTTCTCT CAAA AAGGAGCCTCTTTTAGTTATCCAAGAAA ACCCTCAAGGATTCCCTTC TTTATTCTC  
CTTGCACTGGGAAGGAATAGCTCTATCTATTGAAGTCTTAGATGTTGATACCC TAAAAGCATTGTTCCCA  
TTACTGGAATTCTCA CAAACCTCTTTA TATAGTGGAGAGCCTTATCTTCTTCATAACGTCCACGTGGTCC  
CTGAACAAGCTAGGATCTATTTTACAAAAGAATATCCGCTCTCCCTAAGTCCAT TAAA GAATATCAAGA  
GACGGTCTGGGCCCTATTAAGTATTTTCGCCGAAG CAAAAAATGCACCTCTATTCC TAAAACACTCTCC  
CTCCCCATACATATTATCCCCGCTCTAGACCGTCT TTTTAGAGAACA TTTACTCTCCCAACTCTGTTATG  
AAACTGAAGAACGCCCTATTCACTATGCTATTCACTTCTTAAGAGACGCCTCTCTCTCATT TTTTCGCATA  
TCTAGAAA CACCAGGAGATCTGTCCGAGGGGCATATTATCTATCCAGAATTCTGCTACATTCCTAATAAG  
GGTCTATTAGCTGTATCTGGATTATTATCCCCAGAATCTTCGTTACCATAACGCTCCGACCATATC GAAA  
ATTTCTTGGATGAGTATGGGCCTTTTAT CAAA GAACCTGGATTG CAAA CGT TTTCTAACCAATCCCCGGT  
AGGCTCTCTGTCTTATAACGTTACTGAACAAGGAGTCTTCTATTTCCATTATGATACTGGGAACGCTGCG  
GATATAGA ACTCCGT TTTGG TAAA TGGACGTATTATCTCGACAAGGATTCTTT TTTAAA CAGCCGATTAG  
ACTTAGCTCTTCAAGATGGATTGACGATAGAAGCTCCACAAGTCGCGGATT TTTATTCTTACACATGAAGT  
AGCTCT TAAATCTATCCCCAACTTCT TTTGCTGCACAACCACCTCT CAAATCCATTCTG TTTGAAGTGCAT  
AAAGAGAAAAAAGGATCTGGAATCTATTTACAGCCTATCT TTTGAAGGATTGGAACACGAATCTTGTGCTG  
TGT TTTG GTCAATT TTTA TATCTGC GAAA ATGTAGGC TTTAGTTTG CTCCCTGCAGCCTTACAAA TGCTCTG  
T CAAA TTCTTACAGAGATTCTGCGGATCAAGTCGCTGAATTT TTTA TTACAAT TTTCAAAAAGATGATCGC  
ATGGTGTCCCTGATCCTCAATTAGCTCTTCCAGAGCGTGTGAGCTGAATATCTGGCTATTACAGAC  
CCCATCCGTCTTACCCTTCTCATCTAAAATA GAAA T TAAAACCAATATTGGATCTATTCC TTTAGGGAC  
AGTATTACAAGC TTTGAAAGG GAAA AAAGACTTCTTATT CAG CAAA GCAGGATT TTTGAATCTCGATAAC  
TG TTTATTTG TTTTCCT GAAA CAATCTTATCGTCTCAACGCTATGATATTCAA GAAA ATACCCCTCATCA  
CCATGGTGACAGACATCTT CAAA TTAGATGCTCTGGCACCTATGATAACAGACCC TAATATTCAAGCTTC  
GGAAGAAGAT TTTGGCGTAT TTTCTCCCAGTT GAAA TCCGCATGTCTGCCTCCTATTCCCTG TAAA CTTATTT  
TCCACGGATCACAAA CTCCGTCCCTAT CAAA ATAGCGGCTTATTATGGCTGTGGTT TTTGTATAACCATC  
GGTATCTGGACTGCTGTGCGAT GAAA TGGGATTAGG GAAA ACACACCAAGCCACAGCT TTTACTAGATAT  
TGTGGCG CAAA CTG CAAA AAATCC TAAA TTTTGTGTTGTTG TCCAACAAGTGTGTTGCCGCATTTGGAA  
CATGTATTAGCTTCGCACTTACCTCAAGCTTCTCTTT TTTCTTCCATGGTCCCTCA CAAACC TAAA ACTC  
TCCCTGATTGCGATATACTCATCACTTCGTACGGGAC TTTAAGA CAAA ACTACGC TTTATTTTA TAAGGT  
ATCG TTTACAGTTGCGGAT TTTGAT GAAATTCATACAGT TAAAA TAAATCGAGC CAAATCCA TAAA ATT  
CTTTGTCGTTTAGATGCG CAAATGAAGCTAGGCCTCACAGGAACGCCTGTAGAGAATAACTTGATAGAAT  
TCAAAGGACTTTTG GATATTAT TTTAC CAAA ATTATCTCCCTTCGGATGCCCTCTT CAAA CGATTGTTTAC  
ACATAAAA ATGCATCC GAAACAGATGAAGATATTA TTTCTTCT TAAA GACTTACTACTTAAGCTTACTCGG  
CCATTTA TTCTAAGAAGAA CAAA AAAA ACTCGTCTACCAGAGCTGCCT GAAA AAGTAGAATCGCTGATTC

CTTGTCGACTCTCACCAGAACAATCTCAACTGTATTCTTCGAC TTTGGAAAAAGAAA AATGC CAAA TCCA  
ACA ACTC GAAAAAGAGGAGGATCCGGCTTCTGTAACTACTTGCATGTATTTG CTTGCTTAACCAACTG  
AAA CAGATCTGCGATCACCCTGCAGTGTATTTCAAAGATCCTGAATCATA CAAA AACCATTCCTCTGGGA  
AATGGGCTGCTTTTGTGAAATTACTCAACGACTCTCTGGCTTCAGGATA CAAA GTCGTTGTCTTCTCTCA  
GTACATC CAAATGATCCGCATTATTGC TTTGTATCTGGAAGAGCATGCTATCGAATATGCTCTAGTACAA  
GGGAAA TCC CAAAATA GAAAAGAA GAAA TAGACCG TTTCT CAAA TGATCCCAATTGTCGTGTC TTTA TAG  
GTTCTTACTTGTCTGCAGGAACAGGGATTAACCTAACGGCTG GAAA TGTAGTGATCATGTATGACCGCTG  
GTGGAACCCGGC TAAAGAAAATCAAGC TTTGGATCGTGTACACAGAATCGGG CAAA AAAATACCGT TTTT  
A TTTACAAA CTAGTAACGGAAGATACCCTCGAAGAGCACATTCACTACTTAATAGA GAAAAAATGCGCT  
TACTGAACCAGGTA ACTACAACCAAGATTCCAACATCTTGCATGT TTTG AATCGCGAAGACTTAATTAC  
CATCCTCTCTTA CAAA GACGAACATATGCTATCTGAAGAGGTGCAAGAAGACTCGGGTGATTCG TAAAAA  
AAGAAA TGATTGACCT TTTATTCTTCTT TTTA CGTATTACCTTGATTT TTTT CTCTAGGAACTATAATT  
CGGGAGGGGGTATCGTCTTG CAAA CAAGGGGATGTTGCGAGAAGACATACAGATGGCAGTATGGAAGCCA  
TAAA AAGGCC CAAA GACTGT TAAA GAGGTGATCTCATGCCATTCG CAAA AGAAGCAGATCTACAGCGTAC  
GTGTG GAAATGCGAAGGAAGCGTATCGGCCTGCATGCCTCAATGTCCCTATTGCAGCGCT TTTT CTGCAA  
GATCCTCCCCTGACATCTAAGGGGTTCTTCTTCTTGCCACATTACGTTCCCTTCTGAAGCTTCT TAAAAA  
ATGGAGACAGCGATCTT TTTG CTGTCTCTTCCGAAGATTGGGAAGCTGTACTCAATAGC CAAAATACGTT  
TGAGGAGCCTGTTCAAGAGCCTGCCCCCTCCAGTGGGACTGGCTACAATATTGGCCGACTGCAGCTCTC  
TTCTTGGGTTGCGG TTTT CTTACCT TTTT CGCTCATGATTCTCTTGT TTTT GACAGACTCTGGACTCGTTC  
TCTCCTGGC CAAA GAATCGCTCATACTATGCATAGTCTGGGATTCTGCTTGTCTTATCGTGGGTACCG  
CTCTCTCCCTGAGCATT CAAA TAACACTCTTACGTTCCCTATTT TTTT CTCTCTGCTACCACTTCTCCTC  
ATTGAGAT TTTA TCCACCCAGATGTACAATCCGG GAAA TGAT TTTG TCTGAAGACCTCTCT TTTT CTTT  
CCTA GAAA GGCCTTGAAGGAGAATCCTTCTCCTT CAGATAATCATCTCATATGGATCGTTGCAATCC TAA  
ACACTCATTGAAGAG GAAATGTTATGAATGAAGC TTTT GACTGTGTAGTTATCGGAGCGGGGCCAGGGGG  
CTATGTTGCAGCAATCACTGCCGCTCAAGCAGGACT CAAA ACTGCGCTAATC GAAA AGCGAGAGGCTGGC  
GGAACCTG TTTAAA CCGAGGGTGTATTCCTTC TAAA GCCCTCTTAGCAGGAGCTGAAGTCGTTACC CAAA  
TACGCCATGCTGACCAG TTTG GGATT CATGTAGAAGGATT CAGCATCAACTATCCCGCTATGGTA CAAAG  
GAAGGATTCCGTAGTCCGTAGCATCCCGATGGACTTAATGGTCTCATTTCGAGCAATAAGATCACTGTC  
TTCTCTGGAAGAGGCTC TTTG ATCTCTTCAACAGAAG TAAA AATCTTAGGAGAAA ACCCTTCTGTAAT CA  
AAGCGCACTCCATTATCCTAGCCACCGCTCTGAACCACGAGC TTTT CCCGGGATTCCTTTTTC CGCAGA  
ATCTCCTCGGAT TTTA TGCTCAACAGGCGTGC TAAA CCT CAAAGAAA TCCCT CAAA AAATGGCCATTATT  
GGCGGTGGTGTGATCGGTTGCGAATTCGCTTCCCTATTCCATACTAGGCTCCGAAG TTTT CTGTGATCG  
AAGCAAGCTCT CAAA TCCTTGC TTTG AATAATCCAGATATTTCAA AACCATGTTGTA TAAA TTCACCCG  
ACAAGGACTCCG TTTT GTACTAGAAGCCTCTGTAT CAAA TATTGAGGATATAGGAGATCGCGTTCGGTTA  
ACTATCAATGGGAATGTGCAAGAATACGATTACGTTCTCGTATCTATAGGACGCCG TTTG AATACA GAAA  
ATATTGGCTTGGTA TAAA GCTGGTGTTA TTTG TGATGAACCGGAGTCATCCCTACCGATGCCACAATGCG  
CA CAAA CGTACCTAACA TTTA TGCTATTGGAGATATCACAG GAAA ATGGCAACTTGCCCATGTAGCTTCT  
CATCAAGGAATCATGTCAGCACGGAATATAGGTGGCCA TAAA GAG GAAA TCGATTACTCTGTCTCCCTT  
CTGTGATC TTTA CCTTCCCTGAAGTCGTT CAGTAGGCCTCTCCCAACAGCAGCTCAACAA CAAA AAAT  
CCCCGT CAAAGTAA CAAA ATTCCCA TTTT GAGCTATTG GAAA AGCGGTGCGAATGGGCGAGGCCGATGGA  
TTTG CAGCCATTATCAGCCATGAGACTACTCAGCAGATCCTAGGAGCTTATGTGATTGGTCTCATGCCT  
CATCACTGAT TTTT C GAAA TTACCTTAGCAGTTGTAATGAACTGACTCTTCCCTGTAT TTTA C GAAA CTAT  
CCACGCACATCCAACCTTAGCAGAAG TTTG GGCT GAAA GTGCGTTGTTAGCTGTTGATACCCATTACAT  
ATGCCCCCTGC TAAA AAATGACCGACTCAGAATCTCCTACTCC TAAA AAATCTATACCCGCCAGATTCCC  
TAAGTGGCTACGCCA GAAACTCCC TTTA GGGCGGGTA TTTG CT CAAA CTGATAATACTAT CAAAAA TAAA  
GGGCTTCCCTACAGTCTGTGAGGAAGCCTCTTGTCCGAATCGCACCCATTGTTGGTCTAGACATACAGCTA  
CCTATCTAGCCTTAGGTGATGCCTGTACACGTGCTGCGGCT TTTG TGATATTGACTTCACTA GAAA TCC  
CTTACCCCAGATCCTGAAGAAGGAGC TAAA ATTGCTGAGTCCG CAAA AGC TTTG GGACTCAAGCACATT  
GTCATCACTATGG TTTT CCGTGATGA TTTA GAGGATGGAGGAGCCAGCGCTCTGTCCACATTATT GAAA  
CGTTGCACACAGAATTACCAACAGCAACTATTGAAGTCCTAGCCTCTGAT TTTG AAGGTAACATTGCTGC  
CTTACATCACTTACTGGATACGCACATTGCTATCTATAATCATAATGTA GAAA CAGTAGAACGACTCACT  
CCA TTTG TCCGTCA TAAA GCTACCTACCGAAGATCGCTTATGATGTTGGAGAATGCAGC CAAA TACCTCC  
CTAACCTGATGAC TAAA TCAGGTATCATGGTAGGATTAGGAGAGCAA GAAA GCGAGGTCAAG CAAA CCTT



AAAAGATCTTGCTGATCATGGCGTTAAGATCGTAACTATAGGCCAGTATCTTCGTCCTTCACGCAGACAT  
ATTCTGTGAAAAGCTATGTGTCTCCCGAGACTTTCGATTATTATCGCTCGGTAGGAGAGTCGTTAGGAC  
TC TTTATTTATGCTGGCCATTGTTCTGTTCTAGCTTTAATGCGGATTCTGTTTTGAAAGCCATGCGCCA  
GCGGGAACCTCAACCTCTTCGCTACTTCCGAA CAAA GATTAGCCACATAACCTGTTTCATTTTGAAGCAT  
TCTCTGCA GAAAAAATGTTCCCGATTGGCACTAATCTCCCCATTTGCTATGGTGAGT GAAAAGGTGTGCG  
TGAGTTATGTTTCGTTATACTC TTTCTCGATCCTTATTT TTTA TTTGGCTCTTTTC TTCTGCTCGGCTT  
GTGATAGTCGTTCCATGATTACACACGGCTTGTGAGGACGTGATGCTAAT GAAATCGTAGTGCTTCTAGT  
CAG TAAA GGGGTGCTGCACA GAAA GTTCCCCAAGCAGCGTCTCAACAGGAGGATCTGGAGAACAACCTC  
TGGGATA TTTTCGGTTCCTGCCGCA CAAA TTACAGAGGCTCTAGCTATTCTGAACCAAGCTGGGCTTCCAA  
GAAT GAAAGGAACCAGCCTTCTTGATCTATTCTC TAAA CAAGGGCTGGTCCCTTCT GAAATGCAAGAAA  
AATCCGCTACCAAGAAGGTCTTTTCAGAA CAAA TGGCTACGACCATTA GAAA GATGGACGGTATCGTCGAT  
GCGAGCGTACAGA TTTTCCTTTTCCTGGAAGAAGATCAACGGCCGCTAACGGCCTCTGTATATAT CAAAC  
ACAGAGGGGTATTAGACAACCCTAACAGTATTATGGTGTCTAAGAT TAAACG TTTAGTTGCGAGTGCTGT  
CCCAGGACTATATCCCGAGAACG TTTTCG TAGTCAGTGACCGAGCTTCTTATAGTGACATTACTATTAAT  
GGCCCTTGGGGACTCTCCGATGAAA TGATTATG TTTTC TGTATGGGGGATCATTCTAGCTAAGCATTCCC  
TTAC TAAA TTCCGCTTGT TTTCTA TTTCTTAATCTCCTTCTCTTCATTC TTTTC CTGTGGGCTACTCTG  
GGTCA TTTTGAAAAACACACACACTGA TTTCTGCTCTGGGTGGAA CAAAAGGATTC TTTGATCCTGCCCT  
TACTCACAGCTCTC TTTTACTCAGAATAAGCCAGCTC CAAAAGAAA CTCTGGAGCAGCAGAAGGTGCAG  
AAGCG CAAA CCGCTTCGGAACAACCCCT TAAAGAAA ATGCAGAAAACAAGAAGAGAATAACGAGGACGC  
TTAAGTGACAGCGAATACC TTTGGATTCTTAATATCCTGATGAAGCAGG CAAAAGCTGATGATTTAGCT  
CAG TTTTCG CCGGAACATCTTCTACTAGATTCTCCGCATCATCAGGATATTCTCTGCAGTCCCTTATCTT  
TC AATATGCGTTGGTTAGCAACCATTATCCTTCCCTGGATTAGTGTGCTAT GAAA GAATTCCTCCCT  
TGTGCAATCGCAATTATTAGCTTGGTTACCTCTCCCTCTAACGCAAGAACTACTCCCTCTTTTAGATTCT  
GGAGTTACCCCTGCTA CAAAACGCTGCTTAGACT TTTGGAGC TTTTC TACCTACTTGACTTACTCAGTAAGA  
AAGTACGTCCTCCAGGCATTACAGAAGAGATT TTTTC TCCCGCTTCTCC TTTTC AATGCTATGCTGTACTA  
TGTAGCCCTAC CAAAATGGCCTTGATCAATTGTCTAGGGC TTTA TACCTTAGCTCAAGAAAATGC GAAAC  
GTAGTCGATCGTGTAGTCATTGATCGCGTGCAGCGTGTGCTATCC GAAA CCGAACGGATGTTTCTAAATT  
ATTG TAAAACACATCCTAT GAAA CATCTGGAACCTACGGCCTT TTTAGCCTCTTGGGAGGAAGATCAAGC  
TTTACGTCATTTTCATCCATGTTCAAGG TTTGCGCTTCTTAGCTCGCGCTCTAG CAAAAGAAGATAGCTCT  
TTCC TTTGGTATTTTAATTCGCAGACTTGATGTGCGAAGAGGCTATAT TTTTCGAAA AAGCATTGCAGAGTT  
CGATAGATAGTCCCATAATGAGTAT TTTTCGAGAGCGCTTAGAACACTGTATCAGTATTCTTGTGCAATA  
AATCAGAGAGATCTTCTCACTGCTATTACACTCCCATATATA CAAA AAAAGAAGCAC CAAA TAGCATTG  
TAGATTT TTTTC TCCGATGGCTATGT TAAA AACGAGAGCGATCGAGGGTCAG GAAA ACCTCGATCTCTGTG  
TAAA AAAGAATGCGATCCTTGTCTGGCTATCCCTAG TAAATGACATGCCTCATCGGTTGGGAA TAAAGT  
AACGAG CAAAAGGAGCGAGGTTCCCTGCCTGTTGGC TTTG CAAA GGATCCCTACCTCGTCAGAAGGATGA  
AATT TTTTCAGTTTAATATA TAAA GACCAAGAGGTCGTCCCTAA TAAA AAAGTTCTCTCCCAGACGCCTA  
TACTGCGGTGTTAACTGCCAAGAACCTTCTGGA GAAA ACACAAGAAGATTGTGAAGCTTATACACAGAAT  
ACTCATGAAGAATGCG CAAAGCTAAGGGAAGAGGCTAAGAATCAAGGCTTCCAGGAAGGAAG CAAA GCTT  
GGAG CAAA CAGCTCGCC TTTCTTATTACAGAAA CACAAGCGATGCGAGAACAGAT TAAAGCCTCCCTCGT  
GCC TTTAGCGATTGCTAGCGT CAAA AAGATCATCGGCAAGGAATTA GAAAC TAAA CCAGAAA CTGTGGTT  
TC TATCATTTTCAGAGTC TTTAAAAGACCTCACGCAGAA TAAA CCGATTGTCATCCACATCAATCCTCAGG  
ATCTCGCTATTGTGCAACAACATCGTCTGAGT TAAA AAAACTCGTGGAAATATGCAGATGTGCT TTTACT  
CTCTCC CAAAGCCAGTGTATCCCCGGAGGTTGTATCATT GAAA CAGAGACCGGAATTG TAAA TGCTCAG  
CTTGATGTGCAACTCGCTGCCCTGGAACAAGC TTTTC TCTGCCATCC TAAAACA TAAA AAACCTGCGGACG  
CTTCTACAACAGATCAGCCT CAAA GCAAGAAA GACTAGGTATTGGAT TTTATGCGATTGATTGTTTCGAAT  
TTTC TTC TTTCTCTGCATTCTTAGCGCTCCCTATAGCTTCGCCAGTACTTGTTCGCGCAGCACAAAGCGCC  
TCTTCTTGCTTCCGTGCGCGACCGCTCCTCAGCAAGAACTTCCAGCATCTCCA GAAA AAACT GAAA AGC  
CT TTTTC GTTGTCCATCTTATCGACCAACGGTAGAAGCTCAACACCTGCTACCTCCTCAAGAAGATCT TTTTC  
CTCCGGAGCCT TTTTCAGAAA CGTATCCAGATTTGACTACGCAAGCCGTTATCCTTCTA TTTTC TTGCGTTA  
TCTCC TTTTCCTGGTTATGCTCCTGACCTCCTA TTTAAA AATCATTATTACACTAGTTCTTCTTA GAAATG  
C TTTGGAGTACAA CAAA CACCTCCTAGCCAAGTCC TCAATGGGATTGCTCTCATTTCTATCGATCTACGT  
TATGTTCCCTACAGGAGTGGCTATGTATCACGATGC TAAAAAAGGTATCGAGTCGAGTGCTGTCCCTCGA  
GATCTTT TTTTC TGCAGAAGGAGCT GAAA CAGTATTTG TTTGAA CAAATC GAAA GAACCTCTGCGAT

CCTTCCTTAT TAAA AATACACC TAAA CCTCAGATC CAAAGCT TTTACAAAAT TTCACAAAAGAC TTTC CC  
TCCAGA ACTGCGCAACAATTAACGCCTTCTGACTTCATGATCATCATTCTGCT TTTCATCATGGGACAG  
AT TAAA AATGCT TTTGAGATCGGAGTCTTGA TTTA CCTCCC TTCTTTGTCATCGA TTGGTACGG CAA  
ACGTCCTAGTTGCTATG CAAATGATGATGC TTTC CCTCTATCCATCTCTCTCCCTCT TAAA CTGCTCCT  
TGTAGTGATGGTAGACGGATGGACCTTGCTACTAGAAGGGTTGATGATTAGC TTTAAA TAAGAGAC TTTC  
CTATGCTGATGCTTGCAACAAG TTTC AAA TC GAT TTTGTTTG AATATTCATATGAAGCCCTCTTATTAAT  
TCTGATCA TTTCAGCTCCTCCTATTAT TTTGGCTTCTGTGCTGGGATTATGGTGGCTAT TTTC CAAGCA  
GCAACA CAAATTCAGGAG CAAA TTTC GCTTTTG CTATTAAGCTCGTTGTTCAT TTTC GGAACGTTAATGA  
TTACTGGAGGCTGGCTGTGTAGCATGAT TTTA CCG TTTGCTGCGCAGAT TTTC CAAA ATTTTACAAA TG  
GAAGTAGATTGCCATGGCTACGCTTCCCGAGGTTT TTTCAGGGCTCGGCTCTTCC TATATCGATTATATA  
TTC CAAAAGCCAGCCGATTACG TTTG GACTGTC TTTC TTTTG CTAGCGGCACGCATATTATCTATGCTGT  
CGATCATCCCGTTCTTAGGAGC TAAA CTATTCCCGTCACCAAT TAAA ATTGGGATAGCGCTCTCTTGAT  
GGGATTGCTGCTACCTCAGGTGATACAAGACTCTACGATCGTCCACTACCAAGACCTAGATAT TTTC TAT  
ATCCTTCTTATTAAGGAGAT TTTGATTGGCGTACTCATCGGC TTTC TGTCTCT TTTC CCTTCTATGCTG  
CCCAGTCTGCAGGATCC TTTA TTACCAACCAGCAAGGGATACAAGGATTAGAAGGTGCTACCTCTCTCGT  
ATCTATAGAACAAA CTCTCCTCACGGGATCT TTTATCATTAT TTTG TGACTATCGT TTTC TGGCTTGCA  
GGAGGACATCGCATTATCC TTTC TGTCT TTTA CAATCGCTTGAGATCATCCCTCTTCATGCTGT TTTC  
CTGAGAGCATGATGTCGCTACGAGCTCCTATGTGGATCGCGATAT TAAA AATGTGCCAATTGTGCTTGAT  
TATGACCATA CAGTTGAGCGCTCCAGCAGCGGTGGCTATGCTTATGTCAGAT TTTA TTCTAGGGATCATC  
AACCGAATGGCTCCTCAGGTACAAGTCATCTACCTAC TTTC TGC ACT GAAAGCC TTTATGGGATTGTTAT  
TCCTAACACTGGCTTGGTGGTTTCA TTGT GAAACAAA TTGATTA TTTC ACTCTGGCATGGTT CAAAGAAAT  
CCCTACTATGCTCTTCGGAGCTCATCTCC TAAA GT TTTGTGATA CAAAAAAAAGA ACTCCCTC CAAAA  
AAGAGGGAGTTCTTCACACCACGTAAGTGTAGTC TTTGTTGCTATATGGCCTTACTCATGACGAGAAGTC  
GTGCT TTTATGCTGCCCTTGAGCAAG TAAA ATTACAATAATACAAA GCACGATAAAA AGACAGAA CAAACG  
AAGGAGC TTTGATTAA CAAAAGAGCGCAACCCCGCATA CAAAGCATT TTTAATAGGCCCGTT TTTAGC  
GTAATAGCTCTGCAGAT TTTGTAGCACAGCTAATATCTCAGGAT TAAA ACCCTAAGACTATCCCGGAGGCA  
ACAAA TAACCTCCGACCCAAGATACGCAGTTCTGCTATAATCC CAAAAACAAT CAAAGCACCACCGATGG  
CTTCGCAAGCATGTCGAGAT TAAA AACCTCTTCATCCCCCGACC TTTGGATTTGTGTG CAAA TCACGCAC  
TT TTTG TTTTA GAGAAC CAAACTTAGAGGCCGATGGTTCTTGTGAGGAGCTCTCTT TTTGCATCTCGTCC  
GCCATAAGCCATACTGATTT TTTCT TTTTAT CAAA TTAATCTCGTAC TAAA CAATTAT CAAAAGATAAT  
TTAAA TATAAACATA TAAA AAACCATTTAATTAGTT TTTCTTCTT GAAACGCAACGACTTCTGTTAACCCCT  
TCAT TTTCTGGGTCTACCACAAA AATATAATCCCAGCAGTCCCTAATGTGTAAT CAAA AACCTCTTAT  
TCAG TAAAGAAA GAAGATCATATCGATGGAGAATTACCTGCGT TTTGCTTTGCAACTCTGTGCG GAAATC  
CGTCTAGT TTTAAA AA TTTC TAATGCAGCAGCTTGCCATAAGC TTTAATAGCCAACCTCTGCTGTCGC  
GCGCTCTCC CAAA CCTCTTGCCGTACACGTTCTAATTCAGAATAAGC TTTAGAATTATTGAT TAAA TGCTT  
GAAGAATAACGGGATCTGTGAACAA TAAA TTC AACCTACCCTGATTGGTATT TTTC TCTTCATAGTTGAG  
AAAATGCAA TAAA GAACGCGTTGTCTTAGTGCCT TTTAGCATCTTGTACAACCAACCGGCTTCTCTTCA  
GGGAGGACTACCGTCTCAAGACAATCCGAACCAAGCTCTCGAGCTCGA GAAA TAATCTCATCCT TTTGAG  
CAAG CAAA GCCTCTATAACACGATACTCCGCACCTTGAGGAATGAGCTCTGACTGCACATACAGTCCCTG  
TAGCAACCTAG CAAA AATAGCATATGCTGAAGAAGGATCTCCATAATTCTCCGGAGACTCT TTTCAG CAAA  
GAA TAAA GATTGAACCTAGAATTA TTTG GCGGCCGAGAAA AAGGGA TTTC TAACAGTCGATAGCGCTTCT  
GCCGAACAACGACACTATCACGCTCCTTATCTTGCCTACGAGGCTCTGCTCT TTTC GCCTGGGAAGACAA  
TCG TTTC GT TTTA TCTCTGTAGATCACTTCAGAAA TAGCAGATTGTTGCGCAGAAA AAGCTACTTCTTCC  
TTTC TTGAAGT TTTG CATAG GAAA TTCTCTTACGAGTTCCGGCAGCATC CAAA GATACCACGGTCACCA  
ACGAGGT TAAA CATAGTAGTGT GAAA TAAA ATGCATAGGCTCTATCTACCCACAG CAAAAATATAG GAA  
AGAGTTCTTGGTGGCAAGGCCCAACCTTCTTACTAGTGTAAGTACACTCTATCTGGTCCCTCTCCTA  
GACCTTGATATCTAAGAAC TTTC CATTCATAGAAA GAACATGCGTCCATAAG GAAAT TTTC TCC TGACG  
GGCTCCTCTC TTTC ACTCGCTACTATTAGAGAAA TTTC CTGAGTGATGGGGTCATAGTGTAAACGTCCCT  
TGCACAACACCTGCTAAGTGAGGATCGACATACACTCCCCGATC GAAAGAAA AAAC TAAC TCTTCC TGAG  
CTTCCATGGCAATAGTGGATAAA AAGGTACCTCT TAAA AATCGATACGTCTTGCTCTCATTGAGAAA GAT  
TCTATACACGTGCTC TTTC TCT TTTA TGAGATATCCATATCCTCCGTGTCCAATACCC TAAA GAACCGAGC  
AG CAAA CTGATAAGCACGCAAGCGATGAGAAGTTCT GAAAG TAAA AATGCTCG TTTC TTTTTTA TC TTTC  
TAAA CATAAA CACCTCTGTGCAGCGGCTCCCT TTTC TGGCCAGGGAATAAGTCCACCGTAGCGTCGACC

GAACA TAAAAGCCTGCCGTCTGCGTTACGTT TTTCTCTTAGGAGGGATAGTGTATAGCTATAAGGGATCT  
TGATAGCTTCTCCCTGCTCGTATACACATACACCCCAACAAGCTCTCCTTCCCC TTTTCAGGGAGAGAGC  
TTCTCTATCCA TTTGCTGAAATATGGCGTCTCCACCG CAAAAAACAGTAATCGATGCATGCAGGAAGC  
TGTAAGC GAAAAATGTCTTCTT CAAA CGAACGAGTGATCCGTGTA TAAAACACCACACTAGGAATTAACA  
CTGTG CAAAGAAGGGAGAGAGAAA GAAGCACCTCTACTAG TAAA AAACAACGT TTTCTTTG AAGGCCAT  
TTTCGTCCTTACCCTCGCTGTTTATTCTTAC TTTCTTAGAGAACACAACAATATCGTACCCCTTGT  
ATTTCAT TTTAACAAAGAAGATCTTCTCCCAAGCATC TTTAAGAAG TTTCTTTCTTCTTGCACCACGCA  
GAATCTTC TAAAATCGCTTCTTA TTTGCGATGACCTCT TTTAGAGA CAAATTTTC CGGAAGCATATTCCA  
TCATAAGGACGTCATACACGCGAGCGCAAT TTTGCTCTG TTTGGAAGAT TTTCCCTT TTTGCAAACTCCC  
TCGCATAT TAAAAGCCAAGGCTCCACCAATAATACCAATGAGGGTAATGACAACCATCATTTTC CACTAAC  
GTAATGGATTGT TTTCTTTTT TTTGT TTTCTTTCACAG TTTCCCTCTGTAGT TAAAACG TTTGAATACCG  
CTTGTTAACGGAAGAAGGATTGATAACATAATCAATCCAATAAAA ACCGCCTAGCAACACAAGAACTATGG  
GCTGACACCAGGCAGTTACCCAAGTCAATACCC TTTGAATATCCTCGTTA TAAAATTTG CGCGACATGCGC  
GAATACCACCGCAAGATCCCCGGATTCTTCTCCTAGAGCAACCATCCAATCACCAGT TTTGGCGTCCAT  
GTACGATGAGATAGCTCACGACT CAAA GATCCTCCACGAACAACCTGCTTGGATCACTTCTTGTAGCTCTT  
CGCG CAAA AAGTCTTGTGATACGGCCTCGCATCCTAATGTCAGAGCTTCGAT CAAA TCCCGCTCCTTG  
CAAAACAGCAGATGTGACGGAA CAAAATCGACAAAATCCTAT TTTAATCACCAGACTACG CAAAATAGGG  
ATCTTCTTGATAAATTGCCTCTAGAGTCTT TTTCCCTATCCGTTT TTTCCAGACTATGCGTAGGGATATCG  
CTCCACCTATTCTCCAG CAAAACAAGAAA CTGTACCTACAAAACCATGTACTGCACGAGAAAACAGC  
T TTTGTGAGCCTTGTCTCATCTCCATATCTT CAAAAG TTTCTTTCAATGTAGGAATGACCCCTATTAGAAA  
AACACCACAACAGCACAA GAAAATACCAATAAGATCGCTGGATAACTCAATGCTGCAGCAAGACT TTTGG  
ATAGTT TTTCTTCTCTTCCAACAC TTTAATAATATTCAT TAAA GCGCCTTCTAGAT TCCCAATACTCTC  
TCCAGAACGCACACTATTCTGAT TAAAAGAAT CAAA AATATGCGGGAACCTCGCTAGAGCTTCTGAAAAG  
ACCCACCGGAACGTAGAGCTTCCAT CAAA GAAGTGAGAACCCAGCCAGCGCATGTCCCTGATACTGAT  
CTCGCAATGAAGT CAAA GCATCGTATAAGGAGATCCCCGATCGTAATAAATACGCTAATTGCTTAG TAAA  
AATAACCAGCTCTGTAGTTGTGACACGGTAG TTTCTCTCTCGCACC TTTGGAATGTCCAGAATGCGAGCT  
CCTTGAGCAGCAAGAAGCTCTCTTGCCTCTCGCTGATG GAAA GCCTCTACAAAAGAACGTCGTTT TTTCT  
CGGACTGATCAAGATATGTG CAAAGAAA CCTAGCCATATCCCCCTCTGCTATTCTGACCGT TTTGCCACA  
CG CAAA ACTTCG GAAA GGGTTGTCTCCCAGCAAGAGCCAGTTCTACTCCATGCTCTAGCAGAGGGCAAT  
ACCCCTCTCGCTCCGCAACACCTCG TAAAATGTGGTAAGGTCTCCC TAAAGCAA TTTGAGAACGGAGTGT  
TGTGGTTACATCGA CAAA CTATAGATCCCTTGTCTTCC TTTGTATCCGGAACGGAAGCACTGTGAACAT  
CCACGTCC TTTACATAAAGGAGC GAAA GGATCCTTCCCTAGAGCTCTTAAT TAAA GCCTGTTCTTGCACAT  
CGCCACACAGAATTC TTTGCAATGCGTA CAAA TCTACGGACGAGTCGTTGAGCGACAGCCCTATCAT  
TGTGCGGATAA TAAA TAAGGCTCTACTCCCATGTC TAAAAGACGCGGGATTGCA GAAA CAGCATATTC  
GTATGAAGAGTAGACACTACCAAGTGCCCCGTCAATGCCGCTTGAATAGCAATCTCCGCAGTCTCTTGAT  
CCCGGAT TTTCTCCTACCAT CAAA ACGTCTGGATCTTGTCTTAA CAAA TGGCGAAGTCC TTTAGAAA AGGT  
TAGTCTTAT TTTAGG TTTTCACAGCAA TTTGAGCGACACCAGGGAG TTTATACTCTGGAGGATCTTCTATG  
GTCATGATATTAG TAAA AGGACCT GAAA GGTGTTGTATGACACTATA TAAA GTGGTCGTCTTCCACTTC  
CTGTGCGACCTGTTACTAATAGAATCCCTTCCGGAACCTCTATCGCT TTTCTAAA GGAGGTCTCCAT TTT  
AGGAGGCATACACAAGCCGCGTATATC TAAAATTACATTGCGCTTATCCAGTATGCGCAACACCACCCGC  
TCTCCATGAATGACAGGGACCGTACTGACACGCATATCGATCTCTTGTCTCCTAGTTGCAACTTAATGC  
GACCATCTTGAGGCAGTCGGTGTTCGGCGATATCGAG TTTGGTAAGCAC TTTAATACGAGTAATAAGAGC  
GGCTCG TAAAATGGTTCGGGGGAGCGTGGCGATCGTGTAGAACCCTGCTATGCGGTAACGAATACG TAAA  
AGATCTTCCACAGGGT CAAAATGAATATCCGAGGCTCGCTCTTCAATAGCTTCTTAAAGATCAGATTGA  
GTAACCGCACTACAGGAGCACTGTTCTCTTGAATCTCAAGAAGTCTGTGGTATCAC TTTCCGATTCAGG  
CACTACAGCTTCTGCATAGACTGTAGCATCTCGGAAGC TTTCCGTCCTTATCGCTATATAGCT TTTGC  
AATCCATGAATAA TTTCTGCTTCTTCTTGA GAAA CCAAT GAAA GAGGTT TTTGCGTGATCAACCGCACCT  
CATC CAAAGCCTC TAAAAGGAGTTTT TTTCAAAATGCCTTG CAAAACGATCTTGTGCGC TAAA TCCCTAC  
AGGCAG CAAATAAT TTTCTTTAAA AAAGAGTAGGGAAGCCGATCTAACAGATCTTGCATAGTGCC TTTA  
TTCCCGTCCATCATACTCCACCCTTCTCGAGAGCCGGAGGATCTTCTCCCCATACGGTAGACTCT TTT  
CTTTCTATAGCCTG TTTAGCAGCCTGCTGTCTGCTAC TAAAAGCTCTGAG GAAA TCATCGTTCTCCCCGG  
GGCGAGCAGCCAG GAAA GCACATTCTAAT TTTCTTCTGTCTCACTAGGATTATC CAAAATCTTCGGAGT  
GATAAA CATAAA CATCTCTGTTTG TGAGTCCGAAGCAGAATCCATAC CAAA TAAT TTTCTATTCCTGGC

AACTCTCC TAAA AATGGAATCCCGTCACGAGAATCCATAG TTTG ATTACAACGAAGCCCCCAATAATGA  
CCG TTTG GCCATCTTGAATCCGAACCTTGTTCGTAATA TTTCTGCGTGTAACATCGGGACGATCCGCATG  
A TTTCTCCCAGTCGAAT CAAACGTGATGTCGGTCTC TAAAGTAA TAAAGCTCTCCCATCCTCTTCTCCG  
ATATTAATAACGGGAAGAATCTTAATCATAATCCCGTATTGAGCTCGATTGTATTGGGC TTTA TCCTTAT  
CAGAA GAAACTACAATGACA TTTCTTCCACAATCGCAATCCTCGCCGGG TTTG GTTCATAGTCACGAC  
GGAAGGACTTGCAATTAACGGACATCCTCTTGCGCCATGA GAAA CTGATAAG CAAAGTCATAACTAGGA  
ACAATCCCT TTTG CTCCACCT TTTG AACAGGAATCCAGAATGCCCCACTTGCCAC GAAACGGCTTGCG  
TTCCCTGCTTACAAA CCTCTTCTCC TAAA CGCAATAGGTTCAATCCAGAT TTTA CGTTGATTGGATAGT TT  
TCTTTCAAAA AAGCAGAACCTCTATACGCACCATTTT TTTGGGCACATCCAG TTTCTTCAACAACATCTTG  
ATCTTGGG TAAA GCTTC TTTCTCAATAACCATAATCAAGGTTCCGGTCTTGGAATCTGCAATAAA ACTCC  
CATA TTTGCGAGAACCTTCTTTTA CGGAGCTCCTCAGCGACGTATCTATATGTACCCCTAATCCATTCTGA  
AGAGGATCCCGC TTTA CTGAGACTACGCCAGTATCACAATACTAGATGCCCCAGAAGCACCATTTGAG  
AAA ATATCATGTACTTGA GAAA GAAGCGCTGCAAGCTCCTGAGGATCTGAGTG TTTGACATGATAC CAAA  
ATACCGT TTTATCGGTAGGGCTCTCTATCCCCTCTTCTAGTTCCCGAATAAGATCTATTGCCCTTCTGAAC  
GATGGGAAGAGCTCCACTTAAAGAAA AGCGAGCGTCCATGGT TTTGTAAAGGGACCCT TTTAATCCCACT  
CCAGAAGAATCTTCTCCCTCTTTAGC TAAATCTTCTCG GAAAGCTGC TTTCAAAA ATAGCCAGCA TTTCTG  
AGGGTCTATT TTTGATAAAGAAA CAATGCGATGCTCTTGTGCAATGTTGTCTGATTGTAAGAATCATA  
GAT TTTAAGGAGTTTCGTAATCTCGCTGACAGCTC CAAATAAC CAAAC TTTCCCCCTATAAAAATCAATT  
AACATGGTATCGCTA TTTGCGAACTTGCG CAAA GCTTGTACATCCGCTCGTGCATC TAAATT TTTAGAAG  
AAAGTA CAAAAGCAATATGTCCGTCATAGGCAAGCTATCTAGCTCTTGTCTAGATC CAAA GATACC TAA  
AACACCAGACTCTTCCCTATTAGT TAAA TACAGCTCCTTAATCCAAGGACTAACCTGTCTGATCCCAATA  
CCCAGCCGAT TAAAAG CAAAAGACAAA CATTCTC CAAA TCCTTC TTTAGGGACCCTAGCTTAGACATGG  
CTGTGATACGCATCGCCCCAACAT TTTGAGGAATCACATAGATACTCTGTTTCACTCCGTAATCACTGAC  
CAGATTA TAAATCGTAG TTTCTGGATGATT CAAA GGCATAGTCTTCGGGATCCCCCCCC TTTCTGCA  
ACCTCTACTGACCA TAAATCTTCCAATGAACGTATCCGTTG TTTAGCGCCGATCAATCGGCTTCGCAACT  
CGTCCCATACCGCCTGCGAAGTCTCTCCTCGAGAACGGAGAGAC AAAGCTTCTTCGTA TAAA GAT TTTGAG  
AACATCA TTTG CCTC TTTCAATT CAGCAT TAAA AGAT GAAATATGC GAAAAAGGGGCTAGCGATTCCGTT  
TTTC CTCTAGAGAAGCCAATTT TTTCTGTAATCGTGATG GAAA AACTAGGAACCGT CAAACTTCC CAAAC  
AAAAGTCCCTAGAAA CCCATAGCC CAAAATATT TTTACCTAAGATCCTCCCCCTATACGAGAATTTT  
CGTCCCGCTCTCCTGACC TAAATGACTCTGTGCAACAGTCTCTAGAACCTGCTTAAAGCGG TAAA GAGATC  
GTCTCAACAACGTGCGCTGAGTAT TAAATACATGTCC TTTGAAA CAAATTCCTCGTCTTCTTATCAA  
TTCT TTTCAAAAAC TAAAAGAGGGCTCCGAAGCTTACCTGATAGGTAATCTTCTAATTGTCTTTTGAAGT  
TACCCTCTCCAGCGCTCCCCTGTATGGATGACCCAATCATCTGCA GAAAGAAC CAAACGATCTTTCCCT  
GCTGTAATAATAGGGCGAGACCATGTTTCGCATACCCA CAAAC GAAA ACTCCTTACCAACTCTGCGATTT  
CAATAGGAGAA GAAA CTTG TTTCAACAGCGTGATCTGCTGGCTCATCAACCCATCGATGCTCCACAGCTC  
AATCACCATCATCCGATCATC CAAA CGTTGACTTCGAGAAGAGGGACTCTAGTACCATCTCCTTG GAAA  
GTCTTATAAGGAACCCATCGATCCTGATCCCA TAAA AGCACATCTCCAACAGC CAAA TATTGGCTATACG  
CTTCCCAGATAAA GACTC GAAA TCTACTCGTTC TTTG GCAGCCTGTATGACATAATCTGCCCTCCATG  
CATAAGAA GAAACTTATCCCCTCCACACAGCGGATACGCTGC TTTACAGCGATACTAGGCTCCACTCGC  
ATTCCCCAATTTCCATGTCTGCGAACATCTAGGTGCCATGGA TAAAGAAAAATGCGCGCGCTCCTTAG  
GAGAAGAGACAGCCCCCTCC TAAA GCGCC TTTCAATACGAACAACAACATC CAAA GAACGCCCCGTCGAAGA  
AGGCCGACACTCCAACCATAGAGGGGTAGGCTCAGCAC TAAAACAGAGTGTTC TTCGTCCGGCCCTTGT  
CGAA GAAAACCT TTTCCCTAAAAGAAA CTCTTGAATCGCATTAGTGGTCGCAAGCTC TAAA AAAAAATT  
TACCCTTCGCGCATCCGGACGCTTATTACAGCCAAGGAACA CAAA CTGATTCCG TAAATCCGGGAGTTC  
TTCTCGATAGAAA AGTCTTGTAGCGCCCAAGCCCC TGAACACGCAGGCTGCTTCTCCTCTGCTGTAAGA  
GGAGAGCATACCCCGGCGATCGCGCTATCAAGGCGGCGCCTCTTATCCATTGA TAAA AAAAA GAAA TGAA  
GTTGGCGCATAACAACAGA GAAACAAA AAAGAATGTATAAAA GTAAC TGATTTGAGAAA AAAAAATCAATT  
TTTACAAA GAAAATAA GAAAAGCCGTTTTTTTG TTA AAAAA CAAA AAAAAATCGGCTTTTATAT GAAAT  
AAA TGATAATTATCTCGGAAGAGACC TTTCCGGTTTG TTA AATT TAAAT TTTCAATTCACACCTATCAGAT  
CGTATCTTCAATCCGGATCCCACCTACACCAGG GAAA TATACCCCCGGCTCTACAGTCACAGCCATATTC  
AATTGTAGCGTGGCATCC GAAA AAGGCGATAACCTAGGGTATTATGGACCTCTCTTCCCACGCCATGCC  
CTAGCCCATGAATGAACGC TTTCTCCATTCATGTGCACG TAAA ATACGCACAGCTTCTTATGAACATC  
CCGACAAGGCACTCTGCCCGACAGA ACTCTATGGCTGCACGCTGAGCCTCAGCAACCGCAACGTATCCA

TCCAATAGCTGCTGTTCTGGAGCCGCTC CAAA TGCCACCGTTCGAGTCATATCTGAACAATATCCTTCAT  
AG CAAA CGCCAATGTCGATCAACACCACATCCCCCTTTTTC AAA GATCGATTGTTGGAATTGCATGGGG  
GAAA GCCGCATTCTCAC CAAATGCAATAATGGGAG GAAAAGAGACCTTTTC TATACCAAGTTAGCC CAA  
AAGACGTGAAGCATCCGAACCAGTCTTTTTC TGTAATCCCTGGGCGTAATGCAGCCAGAA CAAA ATCAT  
ATCCTGCAGAACCTA TTTCCGCAGCTCGAGTCATTTT TGGATTTC TTCCGTGCTTTTCACACAACGTAA  
CTTCTCCGCAAC TAAAC TTTGCGGAGAAA ATGCATACCCGCTGTTTCATTTCGTTTTTG TGCTATCCCGTAA  
GGAGTATACTCGCTGT CAAAGCCTATCGTTTTTA ACCCTGTATTTTC GATATAACTGCCGAGTTCCTGAT  
CCACACTTTTAGAATAAGAAA CAAGCACCACGTCTGGATACGAGCATAGAGATCTTTATCTAATGGAGA  
CACAAA CAATACTGCTTCATCACGAGTGATCAA TAAA ACTCCTGATCGAGCCTGATCTTG TAAA AAGTAG  
CTAATATCCTCGTC TTTCTCTAT CAAA AAAGCATCAAGTGC GCGCTCCACTAGAGAATCTTGCAGTCGTT  
TGATCGGATTTTG ATTTCATATCCTATCTCCTACA TAAA ATCGTCATC CAAA ACTAACCGACGTATCATCT  
CTCCGTCAAACGCTTTTTCAGGCTTGCCAAGCTTCCA CAAA ATATCAAGCCAAGCATAATCGAATGCTCT  
TGCA TTTCTAGAGAAA ACCAACTTTTG AACAGTATTTTCAACGAGTTGTT CAAA AGACTCCCCTACATGC  
AGAGCTCCTTCTTGAGCTAGCGCAACAATCCATTC TTTTCAGTTCTTCTTCTTGAA TAAA AGGCGGCGCAC  
TTTC TATTGC AAAACTGTCTGGGCTAATACGCGATAATTTCGATTCC TAAAGCAGTCAAAGCTTC CAAA CG  
CATCTGTAAA AAGTCTGCTTCCAACCTTAGTCATCTGTACAGATGGAGGAAG TAAA AACGTTTGACAGGCT  
AACCTCGACTC TAAA CGCTCGGATAA TAAAGAAA CA TAAA CAAA TGTTTACGCGCAGCCTGTACAAA TA  
CAACATGGACCCCTTCAGAATCTTCGAC TAAA AGAAC TTTTACCTAGGGATGTAA GAAAGCGTACTTTTC TC  
AACAACAGAAA GAGAACTCGAGGCAGAGTCTCTAGACACAATCGTAGCCATCTCTGT TTTCAA TAGGGT  
TGCTGCGAGAAA GTAGGACAAGAAA GCGGGGCGAGACAATCGCAGGACGAATAGATGGAACGCTGATCC  
CCTCAT TTTCTATAGGGATTT TTTCTGTAGGGAC TTTCAACACAATCTCTTC CAAA GAGGATGATCGACG  
CAACAACGCCTCT GAAA TTGCCTCAACAAG CAAA TTACTAATCTGCCCTTCTGTAGTAACCGCACCTCT  
GTTT TTTGAGGATGCACATTGAAGTCGCACCACATAGGCGGCAAGAATAACTTCAATA CAAA TATAGGGT  
AGCGTTGTGCTGGGATCATCCAAGCATAAGCTTCCGCTACCTTTT TAGATATGAAA GACGACTCTACAGC  
ACGATTATTAAT TAAA AAGCCGCTGTCCCTGCCTAGTAGAACGATGCTGGTTAGGAGAGCC TAAA AATCCT  
AGCACCCGAAGATCCCCTTGCTGCTTATCAAT TAAA GAATGCTTCTTGAA CAAA AGACTCTCCAAGACTA  
GCGCTACACGCTCTATGAAGCCTTG TTTCTTAGCCACATGGAGTTCTTGACGACGCTCACTAATCCACGT  
CCACCCAATGCCTTCTGAAGAAA GAACACTATTTTC CAA CAAA CGACGAATGGCCAACCGATCCATCTGC  
GGAGATT TTTGGAAA GATTGTGCGCATGGGAACATTG TAAAAAAGGGAGTGGACCGCAATAGTCGTTCCCT  
GCTGTCTAGGAGCAGGCTCGCAG CAAA CAGGCTCGCCTTTTTC AATCAACGCTT TAGACCCCAATCCTCC  
TGCACGAGCCGATGGATCTCCAT TTTGGAAA TCGAGGCTATCGAGGGCAGAGCTTCTCCCC TAAA CCA  
TAACTAGCGAGA GAAA AGATATCAG CAAA ATGAGCGATC TTTG AAGTGGCATGACGTTGAAGCGCCACC  
GCACCTCTTCTGGATCCATCCCCACTCCATTGTCTCGCACACAATCTGGCCTTACCCCCACCTAGAGT  
TTTGATATGAA TTTCATCCGCGCCTGCATCTAATGAATCTCAATCAGCTCCTTAACTACAGAAGCTGCA  
TTTTCTATGACCTCACCAGCAGAGATCTGGTTAACCGTTACACTATCTAAT TAAA CGAATCCGAGAAGGCG  
ATAACGACA CAAA GCATCTCCGCTATGAT TTTAAGAC TTTACTATTCAGCGAGAGACAGCACGAGA GAAA  
GCGTGAAGTCCAAGCC TTTCCGCGCAGGAGTAACG GAAA AATTGCAAGGCAACGACACACGCTGCTGCAC  
GATGTTAACTTACG CAAA AAGAATTAGTTATGTTTAT TAAA AG CAAA ATAT TAAA AACGTTTTTATTA  
TCAACTTGT TAAA TCAGATCGTTAGAA TTTAATATGTTAGTAGTAA TTTG TTATTTTATTTT TTAGGA  
ATTATCGCGATGAGCACTCCATCTTCTAATAATTC TAAAAAACCTTCGGCCTCT TTTAATAAAAAATCAC  
GTAGCCGCTTGCCGAGATTGCTGCA CAAAAAAAAG CAAAAGCTGAGGATTTTG GAA CAAAAATATCCTGT  
TCCTACGGAAGAGGAGA CAAA ACAAGTTCTCATGGACATCCTACAGGGGTTAAGCAACGGATTAACCTT  
CAG CAAAT TTTAGGCTCTCCGACGTCTCCTTGAAGAGATCTACACCGTAGCATATACCTTCTACTCCC  
AAGG GAAA ATATCGGAAGCTATCGGTCT TTTCCAAA TCTTAACAGCCTC CAAA CCTCAATGCTA CAAATA  
CATCTTAGGTCTTAGCTCTTGCTATCACCAGC TAAA AATGTATGATGAAGCCGCTTTTG GTTTC TTCCTA  
GC TTTTC GATGCTCAACC GAAA ACCCATCCCTCCTTACTACATCGCCGATAGCTTGATGAAGC TAAACC  
AACCCGAAGAATCTCAAGACTTCTCGATATTACGATCGATATGTGTAAGAACAAGCCGGAATA TAAAGT  
TCT TAAA GATCGCTGCAGCATTATGAAGCAATC TTTAGATGCCGTGCT GAAAAAGA GAAATCTG CAAA  
GGCTCT GAAACACAAGCCTCCTCTCC TAAAAACA CAAAAGC TAAA AAAGCTGCTTCTAACAAGAAA AAG  
CAAAG TAAAAGCAGGGAC TAAA CCATGAGTAAA AACATAAGCACAAGCAAGCACACACTTCTTCC CAAAC  
CCAAA GTAGAACCTGCGTATGTTTCGAAA AAAGAATCTCCTGCT TTTG CAAGAATTG CAAAATGCGATGAT  
TTC TTTTCTCAAGACTTGCC TTTAGCGCAGATGTTCTCAGAAA TACAAGATGAGAAA CAATTAGC CAAA  
ATGATGGCAGCACTCAGCGGAATGTTAGACTCTCTTCTGTC GAAA CCTTGA CAAA AGGGGTG TTTGACA

ATCC TAAAGAGGAAGCCCAGTTATCTCAAGAAATTTCTAGTATATTCCTCGGCT TAAAACACCTTACGGA  
AACCG TAAATAAA CATATTGCTGATGA GAAATAATCGTCTCGTCTTA CAAAAGATT TTTAGAGAGGTTAT  
ATGTCCC TTTTATCTTCTTCGTCTCCGATAGTAGCAACCTTAAGAATGTCTTGTCGCAAGTCATAGCTT  
CGACTCCTCAAGGCGTTCCTAATGCAGATAAA TTAACCGACAATCAGGTTAAGCAAGTTCAACAGACGAG  
A CAAAATCGCGATGACCTAAGCATGGAGAGCGATGTCGCTGTTGCCGGAAGTCTG GAAAAGATCGCGCA  
GCTTCTGCTTCT CAAA TAGAAGGACAAGAAGTTATAGAGCAGCAAGGATTAGCTGCAGG GAAAAGAACTG  
CATCTGCCGATGCGACATCCCTAACC CAAAGCGCATC TAAAAGGAGCTAGCTCGCAACAATGCATAGAAGA  
TACTAG CAAATC TTTAGAGCTATCTTC TTTAAGTTCGTTGTCATCTGTAGATGCCACGCATCTACAAGAA  
ATT CAAA GCATCGTATCCTCTGCTATGGGTGCTACTAACGAGC TTTTCTTGACGAACCTTA GAAA CTCCAG  
GCCTACC CAAA CTTCAACGACACCTCGTCAAGAAGTAATG GAAA TTAGCCTTGCAATTAG CAAAAGCAAT  
TACCGTCTTTGGAGAGTCAACGCAAGCAGCATTGGAGAAGTTC CAAA GTACGCAGTCGCAATCTGCGAAC  
ATGAA CAAA ATGTCTCTAGAATCTCAAGGCCT TAAA ATTGAT TAAA GAGCGTGAAGAGTT CAAA AAAATGC  
AAGAGATCCAG CAAA AGTCTGGAACCAACTCTACCATGGATACCGTTAA CAAA GTGATGATTGGGGTTAC  
CGTGGCTATTACTGTGATCTCTGTAGTATCCGCATTATCACTTGCGGTCTTGGCTTGATCGGAACTGCT  
GCTGCAGGAGCCACAGCAGCCACGGCTGGAGCTACAGCAGCAGCAACGACAGCAACTTCTGTAACCTACAA  
CAGTCGCTACACAAGTGACTATGCAAGCAGTCGTGCAAGTGGT TAAA CAAGCTATTATTCAAGCTGT TAA  
ACGGCTATCGTCCAAGCTAT TAAA CAAGGGAT TAAA CAAGGGAT CAAA CAAGCCATTAAGCAAGCTGTT  
AAGGCGTCTGT GAAA ACCCTTGC TAAA AACGTGGG TAAA AT TTTT CAGCGCAGG GAAA AATGCTGT TAGCA  
AA TCGTTCCT TAAA CTCTC CAAA GTTATCAACAC TTTGGGAAG TAAA TGGGTAACCTTAGGAGTAGGAGC  
TCTTACAGCAGTTCTCAACTCGTATCCGGGATTACTAGTCTGCAGCTGTCAGACATGCAGAAA GAAGCTG  
GCC CAAA TT CAAA AAGAAGTCGGAGCTCTCACAGCTCAATCT GAAA TGAT GAAA GC TTTT ACATTGTTCT  
GGCAACAAGCAAG TAAA ATTGCAGC TAAACAAA CA GAAA GCCCTAGT GAAA CGCAACAGCAGGCGGC CAA  
AACCGGAGCTCAGATAGC GAAA GC TTTGTCCGCAATAAGTGGCGCCTTAGCCGCCGCAGCTTAACCTATTA  
ATTT TTTGATGGAGATCGTGTGTTATGACAACAGGAGTACGTGGAGATAATGCTCCAGATCCCTCATTGT  
TAGCTCAGCTCACC CAAA ATGCTAAGCTCAGCATCCGCAGCTTCAACAG GAAA AACGGT CAGGTAGCCGG  
CGT TAAA CAAGAAA ACGTTGACGCCAGT TTTGAAGACTTACTGCAAGACGCTCAAGGAAGTGGGGGAAGT  
AAA AAGGCTACTGCCAAT CAAA CAT CAAA AAGTA GAAA GAGT GAAA AAGCACAGGCAAGTAGCGGAACAT  
CAACCACAACATCCGTAGCTCAGGCTAGC CAAA CAGCAACTGCACAAGCCGTTACGGTGCACGCGATTCT  
TGGA TTTA ATAGCGATGGATCCGCCACCCTTCCCTCCCTACCGGAACAGAAGTCAATGGGGTGTCTTA  
CG GAAA GGAATGGGAAC TTTAGCGCTCATGGGACTGATTATGACCCTACTCGCGCAAGCAAGTGC TAAAT  
CCTGGTCTTCGTCTTCCAACAA CAAA ACCAAGCTATCCAGAACCAGGTAGCTATGGCTCCAGAGATCGG  
AAA TGCTATTTCGGACACAAGCAGGCCACCAAGC CAAA GCTACGGAATTACAAGCTCAGCAGAG TTTGATT  
TCAGGATTACGAACATAGTAGGATTCGCGGTCTCTGTAGGAGGAGGATT TTTA TCCGCCCTCGAAGAGTT  
TGGGAGGGT TAAA ATCTGCAGCCTTCACTAAT GAAA CTGCAAGCGCGCAACCTCTGCGACCAGTTCCTT  
AG CAAA AACAGCCACTAGCGCACTGGATGATGTAGCTGGTACAGCTACTGCAGTTGGAGC TAAA GCCACT  
TCTGGAGCAGCTTCTGCAGCTTCATCCGCAGCTA CAAA ACTTACG CAAA ACATGGCA GAAA GCGCCTCGA  
AA ACCCTCTCT CAAA CAGCTAGTAAGAGTGCAGGAGGATTATTTCGGTCAGGCATTGAACACTCCTAGCTG  
GTCT GAAA AAGTGTCTCGTGAATGAACGTTGT GAAA ACGCAAGGAACACGCGCAAC TAAATTTG CAGGG  
CGAGCCTTGTCTTCTGCTATGAACATCTCA CAAA TGGTGCACGGTCTCACGGCTGGGATCGATGGGATCG  
TCGGAGGGGTGATCGGAGCGCAGGTAGCCCAAGAA CAAA GAATGGCTGGTATGGCAGAGGCTCGCGCAGA  
GGAGCT CAAA TCTCTTAACTCAGTTCAAGCCCAGTATGCTTCGCAAGCCCAACAAC TCCAAGAGCAATCT  
CAACAGAGT TTTA ATTCGGCACTG CAAA TTTACAAA GCATCTCGGACTCTGCTCTG CAAA CGACAGCCT  
CTATG TTTA ACTAATCGACT TTTCTTTCTCGCTCTTATTTGCAACTCAGCTT CAGAACCCTAGGCATCCTA  
AAAGGGCCCTACGGTT TTTCTTTA CTCTGAAGTCAGCACATATCCTTGGC GAAA TTCCTCATGG TAAATA  
AGCCGACAACCCAACACCATAAAA ACCTACAG CAAA CAATAGCCCAGGAGG GAAA CTTTCTCCAAGAAGCA  
ACCAAC CAAAAAAGCTAG CAAA TAGAGGCATCAC TAAA TTGCAGAAGGACAGGAAGGTTGAA GAAA AAGA  
ACGCAATAACTTAG CAAA CAAGTTATAG CAAA T CAAA AAATCAC CAAA GCACCTATCGCCTGT  
AGAAA TAG TAAA GGGT TTTT CACAGGCACAGGGTTC CAAA CTTCGGTGACAGCAGAATGTATTAACGACA  
ACACCCCTGCGATGACCATAGCATAACGATTAATCGCGGTGATGGATAGCGACTCACATCTTCGCCCTAA  
T TTTT TGAG CAAA GTCCAACCATAAGAA GAAA GACAGGTAGCTGCTATCAATAAGAGTTCCGGTAATCCT  
AACTGCCATCCCCACTCAGCTACATCTTCGCTACCTC CAAA CAGCAGGTACACAAGGTAAGTACTGACTAACC  
C TAAA CTTAATCCCCAAGCTTT TTTT CAAGTAACAACCTCTTAAGCTGGACGTAAGAA CAAA AAGCGGC  
TGT GAAA GGT GAAA ATCCA TAAATAAA GCAAGCTGTTGAGGAT GAAA GCCTCTGCAATCCAAT TAAA TTCC

AATACATTAGTTAAA TAGAAA CCGATAACGGAGAGCAATACTATAGGCATGATAGCTGGACGCGGCAGAC  
GAAGAGACTCGCGTTTACATAATAGCAGCC CAAA AAGAACTACTCCGGCCAATACCATTGACTCCCTGT  
CACAAATAAAGGAGCTGCAGCTTCCATTGCCGACTTGCTTAAAG CAAACGAAGAGGACCAGATGAAAGCA  
TTCAGGAAAATTAAGAAAATAGCCATGTCACAACAGGGTTTTAAA CACACAGGTTCGTAGAGTACAAGCGA  
ATAACAACGCCTTGACCGCCACCATGAACCGTGTGCGACGGATCTACGATCCGTTCTATAGAACAACCAA  
GCTTGTGCTAGCTGTGCAC TAAA AAAATAAGGATCTATTGTAGGGCATCTCTT GAAA AAAAACCAGGTT  
GAAAAAAGTTTTGTTATGGATCTCTATAACAATCTCC TAAAAGAAGTCCTCCGAACTCAGATTCTCATTT  
TATCC TTTATAAAA ACCCTTTTGCTTAGTTCGGT GAAACGCTACAATGG CAAACACTCCGCG TAAA AAGAG  
ACGATTC TTTGCAGCGG TTTGCAG TAAA TTT TTTATTTATGGAGAAGGAATGATCCATGTAACCTTGCAAT  
CAAGAAGC TTTGAACTACCAGAAGGCGCCTCGGCGATGGATCTTG CAAATAAGATGAAACAATCTCATT  
GCTTTG TAGGGGCCCTTATTAATGATCAA GAAA AGGATCTTTCCACCACCTTACAAGACGGTGATACCGT  
TCTATTCCCTCACTGGGATGATCC TAAAGGTAGAGAAA TCTTT TTTA CACACTTCAGCACATATCTAGCT  
CAAGCCGTTCTACGCTTATGGCCTTCGGCACAGCCAACGATTGGTCCAGTCATCGATCAAGGGTTCTACT  
ATGAT TTTGCCAATC TTTCCATCAGCGAAGAAGA TTTCCGGCTATAGAAGCTATGGC CAAAACGATCGC  
AGAA GAAAAAATTCCTATCTCGCGTCAGGT TTTCCAGACA CAAAGAAGCTGCTCTTGCCTATT TTTCTCAA  
AATCCC TTTAAAGCAGAGCTCATTGCTGAGCTTCTGAAGAAGTA GAAATTTCCGCGTATACGCAAGGAG  
AATCTTGGATTTA TGTCGAGGCCCGCACCTTCTTCGACAGCTCCTGT TAAAGC TTTCAAGCTATTACG  
CACATCTTCTGCTTATTG GAAA AGTGACCTTCTAGAGAATCGCTGATTCGAATATATGGAGTCTC TTTCC  
CCTACGACCAAGGAACT GAAA GAACATCTTCATCAGCTAGAAGAAG CAAAAAACGCGACCATCGAGTTC  
TTGGAA CAAAGTTAGATCTGTTCTCTCAA CAAA CTGTTCTGCTGGAATGCCTTT TTTCCATCCTCGGGG  
TATGGTTG TTTGGAACGC TTTAGTTGACTACTG GAAA CGCCTTCATCAGCGTGCTGGCTATCAG CAAATC  
CAAACTCCCCAACTCATGAATAGAGGTTATGGGAGATCTCTGGCCATTGG GAAA ATTA CAAAGAAAACA  
TGTATACCCTCACCGTAGATGAAGAAGATTATGCAAT TAAACCCATGAATTGTCTGGCTGCATGCTGTA  
CTAT TAAA ACCCAGCTACACAGCTACCGAGAATTCCCCTTACGGATTGCAGAAA TCGGCCACGTACATAGA  
CACGAGC TTTCTGGAGCTCTATCAGGCTTGATGCGAGTGCCTAC TTTCCATCAAGATGACGCACACGTAT  
TTTTAACACCTGAGCAAGTTGAAGAG GAAACACTCAATATCC TAAACCTTG TTTCCGAACCTCTATGGAAC  
TTTTG GACTCGAGTATCACTTAGAAC TTTCCACTCGTCTTGAACAAGGAACCATTGGAAGCGATGATCTT  
TGGAAC TTTGCAACAGAGGCTTTTGAAAAGAGCTCTCGT TAAATCG CAAAACCT TTTATCATAAGCCAG  
GAGAAGGAGCCT TTTACGGTCCAAA AATCGATATCCATGTAAAAGATGCGATCAACAGGACTTGGCAATG  
TGAACGATTAGTTAGATATGTTCTTCCGGAACGATTTCGACCTGAAGTACA CAAATGCACAAGGAGAG  
AAAAGTACACCTATTATGCTCCATAGAGC TTTGTTGGATCTATTGAGCGATTCTTAGGCAT TTTAATCG  
AACAT TTTCAAAGGACGTTCCC TTTGTTGGCTAAGTCCAGAGCATGTTTCGATTATTACCGTCGAGATCG  
CCACGAGGCTCGTGCCCAAGAATTGG CAAAACA TTTAGC CAAATGGAATCATGTTCTCTGTTGATTCA  
TCTAATGAGTCTGTCAGTAAGAAA ATTTCGCAATGCG CAAAACATGCAAGTGAATTACATGATCACCATTG  
GAGATAAGGAATTAGAGACCCACTTACTAGCAGTGCGCACACGAGACAATCGTGTGTTGAACGATATCGC  
TGTCGAACAGTTCTCTCATGTTATTCTTGAAGAGCTTCGCTC TTTATCCTTGACTCCTTCTTATAGAAG  
GCCGGGCTTG CATAGATTCTGCCTATGCAAGCCATTA TTTCTTTTACACATCCTCGCCAATCTCCTTA  
CAAA CGATCATGGA TTTCAAATAGCC GAAACC TTTA TAACATGTTTCGCTGTAG CAAA AAATTC TAAA TAA  
GAATAAA ACAAGCAGGCCCAGGGCTC TAAAATCTCATCGAGTTAACTATAACGATTTTTCTTCCCATGGTA  
GTTGCTACAGTAATCCTGTTCCG TTTACAAAAGACTTATCCC TAAA AATAGACT TTTCTACCGGAGGGAT  
ACTGTACCCAATAATATA GAAAAGAGGTATCTGGAGAGC TTTCTTAC TTTATTCATCTCCTTTAACCTCA  
TTCGTCCATGCTTATGGA CAAATCAATA TAAAAGGAAT TAAAGCAAC TAAAAAGGAGCGAGGCTTCCCTCC  
CCTACAAGGGCTTCACTCGTGA TAAACATGAAA ACAATCGCTGTTAATAG TTTCAAAGGCGGCACAGCA  
AAAACCTCTACAACCTCCATTTA GGAGCCGCATTAGCGCAATATCA TAAAGCACGCGTCTACTCATCG  
ATTTCCGATGCACAAGCGAATCTTACGGCAGGATTAGGCCTAGATCCTGATTGTTATGATAGCCTTGCCGT  
TGTTCTACAAGGA GAAA AAAACATAGAAGAGGTCATCCGTCCTATTGATTCCCTCAGGATTAGATCTCATC  
CCTGCCGATACTTGGTTGGAACGTGTGGAAGTCTCTGGATC TTTAGCTGCTGATCGTTATTCTCATGAAC  
GAT TAAA GATTATTC TTTCTAAGATAGAACATCGATACGACTATGTCATTATCGACACACCTCCTTC TTT  
ATGTTGGCTCACAGAATCAGCTCTAATCGCTGCTCAGCATGCACTCATCTGCGCTACACCAGAATCTAT  
AGTGT TAAAGGCTTA GAAAGGCTTGCCACC TTTA TTCAAGGGATCTCATCGCGACACCCTCTCAATATTT  
TAGGAGTCACGCTATCTTT TTTGGAATTACAGAGG GAAA AATAACGCAGCCTTACAGAGCTAAT CAAA  
AACGTTCCCTGGGAAA CTCTTAACACGCGCATACGCAGAGATATTACTATCTCAGAAGCCGCTATCCAT  
GGGAAA CCTGTT TTTCTCCACAGCCCC TTAGCGGAGCCTCGGAAGACTATC TAAA ATTAACCTGAAGAAC

TGCTATTTTGTTAAGGAACATCTAACGTTATGGGAAATATTAAAACCCTTTTGAAGAATCGCTTTAAGA  
AACCTACACCCGATAAAATGGAATCCCTCGCTAAAAGCGTTTGAAGGAGAGCTTTTCCTTTCTAAA  
TGGGTTTACTAATCCTAAACTCTCTTCGCAAGAGGAAGCTAGATTCGGTCAATTACTAGAAGAGTACTCC  
TTTTCAAGGAAATCTCCATAACGATCTCCAACAACGTGTGTACTTATCTGCTCAGGTAAAAGATTC  
ATCATCAAGCTGTCTTCTCCATGGTGAGCGAATCAAAGAAAGTTCGTGAATTATAAAACCTATCGAGA  
AGGAGCTTTTCAGCTTGGCTCTTACTCACCTATGGGAATCGGCAGACACCTTATAATTTTCCTGTTTAT  
TACGAGCTATTCTCAGCTCTTCCAGACACTCTTAAACTCGAGTTAGAAAGACTGCCTCGACAAGCAGTGT  
ATACACTAGCTTCTCGAGAAGGCTCGCAAGAAGAAAGAGGAAATATCCGTAACATCAAGGTGAAAC  
TCGTGGAGAACTCCTAGAAATTATCCGTAGAGAAATTTTCGCTACTTCTACCGATCGACGTCAATCATCC  
CTTGCCCAACAAGCTTTTCCTTTTTTTGCAAAAGGAAACAAATTATTACAGCGATGTACAGACAATTTCTC  
AAGAAGAGCTCCTCTCCCTGGAAAATTTGATTAAAAGTTACAAAAGTTACAACCTAACCCTTTCTAA  
CACTAAGGTATCCCGTAATGACGACGAAACCAAAACCTCTAGAAATCGATAACAACACGTTCTCTGCTTT  
GGAAGGCAATTTAAAAGAATTTTGCCACGCTATTGGGTATACAACGTTTGAAGAAATTTCAAAATGTA  
GTGTTTAACTGCGCACAAAGGACAACAGGAGCTTGCAAAATTTTATTTGAGATGTTGATCAATGGGAAGT  
TGTTGCAAGAGCTACCTGCAGGACAGAAACAATCTGCACAAAGTCTAATTGTACAAATTTATGATGCCGAT  
TCGTGTTGCGAAGGATATCCATGAGCGCGGTGAATTCATCAATTTTCATTACTTCCGATATGCTAGCTCAA  
CAGGAACGCTGCGTATTTTAAACCGACTCTCTCGAGTTGATGGGCAGGAAATTTCTACTCATGACGGATG  
TACAAAATACCTGCCATCTCATCCGCCACTTACTGTCTCGTCTGCTTGAAGCGCAAAAATCCTATCGG  
AGAAAATCTCCAAGAAATCCAAGAAGATCTCGATTTTACGCGCTCACTTTGAAGAATTAACGAA  
TCTGTGTAATCTATTCCATAACAATCATCTTTCTAAAGATGATGTTACACAGCCCTGAATCAGACTATTT  
TTAAAAGCAGGCTTTTAGGGCTTATTTTTCGTAATAATCCAGAGATGCTTGCATCGATAAATTAAGAA  
TTAAAGAAAAGCAAGGAGCGAGGTTTTCCTCGTGAGTCAACTATGAAAAAAAACGCGTTCTTAC  
CGGAGATCGCCCTACTGGGAAACTTCACCTAGGGCATTTGGATCGGCTCCATTATGAATCGTCTCCAGCTA  
CAAAATGACTCTCGCTATGATTGTTTCATTATAGCAGATTTGCACACGCTAACTACTAAAACGCGCA  
AAGAAGAAGTCTTCAATAGATAATCATATTTATGACGTTCTTCCGACTGGCTTAGCGTAGGAATTA  
TCCTGAAAATCCGCAATCTACCTGCAATCGGCTATCCCTGAGATTTATGAATTAAATCTCATTTTTTC  
ATGCTTACCCCGTTGAATCACATTATGGGTATTCCTAGCATCAAAGAAATGGCCAGCAATGCTTCTCTAA  
ATGAAAGAAAGCCTATCGCATGGACTTATAGGATACCCTGTATTACAAAGTGCAGATATTCTACTTGC  
TAAAGCACATCTTGTCTCTGTTGGGAAAGATAATGAGGCTCATGTAGAGCTGACTCGTGATATTGC  
TAAAACA  
TTCAATCGGCTCTATGGGGAAGTGTTCAGAACCCGATATTCTGCAAGGAGAACTGACAGCCCTTGTAG  
GAACCAATGGTCAAGGAAAATGAGTAAATCCGCGAATAACGCCATTTATCTTTTCGGATGACG  
TAAAAGAC  
AGTACAAAGAAAATACGAAAACATAACCGGATCCTAATCGGATTCACGCGACAACCCAGGAAGAGTG  
GAAGGAACCCTTTATTTATCTACCAGATCTTTTAAATCCTCATAAGGAAGAAGTAGAAGAGTTAAGA  
CTCGTATCGTCAAGGATGCATTAAGATGTAGAAGTAAAAGCTCGTTTAGCAGAAAGAAATCAATCTTT  
CTTAAATCCTTTCGAGAAAACGTAGTGAATTAGTTGCTCAGCCTAAATTTCTCGAGGAAGCCTTGCAA  
CAAGGAACGAAAATGCGTACCGTAGCTCGAGAAACATGGAAGAGGTGCATGACCATCTAGGATTA  
GCCGAAAATGGCGGACTATTCTAGCCTCTTCTAAATAAAAATCTTAACAACATATCCATTGTGTGGGAGG  
AGGAGTTCTGAAACAGCAATTTGTATTACATGCTCTTTTCCTCCCTTGTGGAGATCAGCCGAAGCAATT  
CGCAGACTATCCCAAGGATTACAGATGGAGTCCCTGCACAAGTTCCTTAGGAACCACTGGATCCGAA  
AGACTTTACCATGGCAATGTTATTGCTAACGTGAATGTTCCCACTCTGGTACTTGCTCATAA  
TAAAAC  
TCTCGTGGCCAGCTGTACCAAGAAATTTAAAGCCTTCTTTCCAGAAAATGCAGTCAATATTTTATTTCC  
TACTATGATTACTACCAGCCTGAAGCCTATATCGTCTCGTAGTGATACGTACATTGAAAAAGCCTTCTTA  
TCAATGATGAAATGATAAGCTCCGCCTTTCAGCAACACGTTCTATCTTAGAACGCCGAGATACTCTTAT  
CGTTTCCTCTATTTCTTGCATCTATGGAATAGGATCTCCTGATAACTACTCTTCTATGGCTCTCACATTA  
GAAGTTGGTAAAGAATACCCTCGATCGCAACTCTCTTCTCAACTCGTACGCATGCACTATCAGGCCCTCT  
CTACACCACAACGGAGTGCCTTTCGTGAACGCGGAAGTGTCAATTGATATCTTCTTGGCCTATGAAAGCGA  
TCTTGTGTACGACTCGAATTCATGAACGATACGCTTAATTTTCGATAGAGTATGTGGATCCATTAACATG  
ATCCCCCTCCATAACCACCTCGTCCATCACTCTCTATCCAGGGTCGCACTATGTAACCTCCGGAAGCTGTT  
GAGAACAAGCGATCCGCACAATCCGAGAAGAACTCGAGCAACGCATGCTTTTTTTTGGAAAGGACGTCCTGT  
AGAACAAGAAGCCTCTTTCAACGTACCACGCATGATATCGAAATGATTAAGAAATTTGGATTTTGCAAA  
GGAATCGAGAATTATCCCGGCATTTTACAGGGGCGCTCCTGGAGAGCCGCCAACCTGCCTCCTAGACT  
ATTTCCAGATGATTTTCCTTTAATTATCGATGAATCTCACAAAATCTTCCACAATTACGTGCTATGTA  
TCGAGGAGATCAGTCTCGCAACAGTCTAGTAGAATATGGATTCGACTCCCGTCGGCTTTTCGATAAC



AGACCGCTCACCTATGAAGAAGCTCGTCGTTATTTTCATCGTGTAATTTATGTATCCGCAACTCCTGGAG  
ATCTGGAATTCAAAGAAATCGTGGACATATCATCGAACAAATCATTCGCCCTACAGGAATTCCTGATCT  
CTTACCAGAGATTCGCCAGCTAAAAGGACAAATCGATGATCTCTTAGAAGAAAATCCGTCAACGGCTCCGT  
AAAGATCAAGAAAATCCTTGTATCTCCGTAAAAAATAGCTGAAGATATCGCTGCCTCCTCG  
CAGAGCTAGGTATTGCTGCTGCATATCTGCACTCAGGAATTGAAACAGCAGAAAAGAACGCAGATCCTTAC  
TGATTTGCGATTAGGGAATATCGATGTATTGATTGGTGTCAATCTTCTTCGTGAAGGGATTGATCTACCA  
GAAGTTTCATTGGTAGCGATTCTTGATGCAGATAAAGAAAGGGTTTTACGTAGTAGCGCTCTCTTATTC  
AATTTGTGGACGCGCAGCTCGTAATATTCATGGGAAAGTGAATTTGCTATGCAGACCGCATCACTCCATC  
TATGGATCATATGCTCAAAGAAACAGAACGACGCAAAAATACAGCTCGATTACAATCAACAACATAAA  
ATCACTCCGCAACCTATTATTAACCGATCTTAGCTAATCCGATTACTAAAAGAAAGCTGGTCAAGAAAGAA  
CTCGTTTAAAATGCAATCTTCGAAAGAGTTGGAAGCCTCTATAAAAACCTATGAGGAAGCCATGTATCA  
AGCAGCTCAGGAGTTCCAATTCGATGAAGCTGCGAAGTACCGTGAATTTGATGAATGCAGAAAAAACAG  
CTCCTCTTTTCAAAAAGGAGAAGAAAGAAATGGGGACTGAAAGGATACCACAGAATTTGAATCCCTCGCTA  
TGATCCTTTTCTACTAAGGGAATCTCCCTCCGAGCCTTCTCTTTGTATTGCGGTCATACATGCTCATCGG  
AGGAAATTAGATAAAAACGAGCGAACTGCTTTTCATTAACCGTTCTAGACAAGGATCTTGTATGTTGATG  
TCGTCATCTCCGATATAGAAGCGAGAGAAATTTTAGATTCTCGAGGCTATCCCACATTATGTGTAAAAGT  
CATCACTAATACAGGAACCTTTGGTGAAGCGTGCCTTCTTCTGGAGCATCTACAGGCATCAAGGAAGCT  
TTGGAAGTGCCTGACAAAAGATCCTAACGTTACCAAGGAAAGGGTCTTACAAGCCATTTTCTAATGTGC  
AAAAAGTGTGGTGCCTCGCTTTTACAAGGATTCAGCGTATTTTGACCAAAATTACAGCTGATGCGATTATGAT  
TGATGCTGATGGAAGTCCGAACAAAAGAAAAGTTAGGAGCTAATGCGATTCTTGGAGTCTCCCTAGCATT  
GCAAAAGCTGCTGCAAAATCTTTACAGAGACCTTTATATCGGTATCTTGGTGGATCTTTTCTCGCATGTGC  
TTCCCTGCCCCTATGATGAATCTCATCAATGGCGGTATGCATGCTACAAATGGTCTCCAATTTCAAGAAAT  
TATGATTCGTCCAATTAGCGCTCCTTCTCTAAAAGAGGCTGTGCGGATGGGAGCAGAAGTCTTCAACGCC  
TTAAAATAAATCTTACAGAATCGACAGCTGGCTACAGGTGTTGGTGAAGGCGGATTTGCTCCTAATC  
TTGCCCTAATGCCGAAGCTCTGGATCTACTCTTAACAGCAATCGAACTGCAGGATTCACACCTAGAGA  
AGATATTTTCTTTAGCTCTCGACTGCGCTGCTTCTTCTTTTCTATAATACCCAAGATAAAACCTATGATGG  
AAATCGTATGCAGATCAAGTGGGTATACTTGCAGAATCTGTGAGCACTATCCTATAGATTCTATCGAAG  
ATGGGCTAGCCGAAGAAGATTTTGGAGGCTGAAAATCCTATCCGAGACTTTTAGGAGATCGTGTGCAACT  
AGTTGGAGACGACCTATTTGTGACGAATCTGCATTGATTGCTGAAGGAATCGCTCAAGGACTTGCCAAT  
GCCGTTCTCATCAAAACAAACCAAAATGGAACACTTACAGAAAATGCAGAAAGCTATTCGTTTTAGCAACTA  
TACAAGGCTACGCTACCATTCTTTGCGATAGATCAGGAGAAAACAGAAGATACTACCATAGCAGACCTTGC  
TGTCGCTTTTAAATACAGGTCAGATTAACACAGGGTCTCTTTTCCGTTCTGAGCGTATCGCTAAGTATAAC  
CGTCTAATGGCAATTGAAGAAGAGATGGGTCCAGAAGCTCTATTCCAAGATTCAAAATCCCTTTTCTAAAG  
CATAGGAAAATCTGAAAATAAGCTGGGAAGGGATTGCTTATAAGATCCCTTCCCCCCCCCTTTGCTTG  
AGGATTTTCTCTGGGAGAGTATGTACAACTTTATTAAGCTCCTCTGGGAAAAAAGAGAAAATGACCAT  
CCCTATTCATGAGAAATAATATTCATGATCTCCTTACACGCACGATAGGTTTTCTGTTATGGCTTATC  
TGTGTGGCCGCTATTATGTTCCCTTAGGGATCAATATCTTGCAATTGAACCTCAGCAATACAAAGAAA  
CACTCTCCTCTATCACTTCCGATCTGCGAGAAAATGCTTTATTTAAAGCTCACACTTTTACAACAAACTAT  
TCCTTTAAATATTGATATCCTGGCTCTCTTTTCAGAAATTTTGTATCTAGACAGAGGAGTCCCTGCTGAA  
CCGGATCTTGCTCTAAGTAAAGAAAATGGAGAAGATCTTTTACTCCACTTATAAAGAGATTTTCTCTAGTAA  
AAAAAGAGGCTGATGGGAACTTTAGAGTCTGTTGCTTCTAGCCGCATCGAACAACCTTGGTAAAAACTATAA  
CCAAGAGATTTTCTATCAGATTCTCAACCAATTTCTCGCTACTTTGCGACATTCCGGTCCGATTCTCAG  
GTTCTGGCTGTCTTACAACGAATATTTTTGATATCAGCTCTCAAGAAGTCCCTGGCGTACTCTATACCC  
TTTTGGATACCAACTATTTATTAATGAGATTACTTGCAGCTAAAATGATCCTCTCTCCGTAAAAACTGCAAT  
TCTCTCTAAAAATGGCATCATTCTTCAAGCAACAGATTCCTCTTTTAGATCTTGTATCAATACAACAACG  
GTTTTCTAAAGAGCAATTTTGTGATGTTTTCTTTCGCGATGATATCTGCCCCCTCATCTCTTACTACGCC  
CCCCTTTAAATCTCGATCCTCTTCCCTTATGGCGAGAAATTTGCTTTTCAATTTTGCATTTGGGAACACAGAAAT  
GTGGGGATATATCCACTCTCTACCTGAGATGGATTTTCGCGATATGACTTATGAAAGAAAATCTATAATT  
TTTGTCTTCTTTATGCGGACGAACCTTACTGTACTTTGCTTATTTTTGTGCGTACTTTTAGGAAGCATTA  
CAGCTTTTTAGTTGCAAAACGCCATCCAAGCCTATCCGGAAGCTGGCTACGGCCATGATGGAAAATCG  
TCGCAATCAACACCATCCATATGAACCCGATTCTCTGGGCTTTTGAAATTAATCATCTAGGAGAAAATCTTT  
AACTCCATGGTGCAAGGCCTTTTCGCAACAGCAATCTTTAGCAGAAAATAATTTTGAGATCAAAACAGCATG  
CACAAAATGCATTACGACTAGGAGAAGAAGCTCAACAACGCCTGCTTCTTAACCAGCTGCCTGATTCGGC

AACTACAGAAAATCGCTAAAGCCTATATTCCTGCAGTTACGGTAGGAGGAGATTTCTTTGATATCTTTGT  
ATAGGCGAAGGTCCCAAGCTAAAATCTTTCTAATCGTTGCTGATGCTTCCGGGAAAGGAGTCAATGCGT  
GCGCCTACTCCTTATTCCTGAAAACATGTTACATACCTTTTGTAGTGAGCTCTCCTCTATTCAAGAAGC  
CGTTCAAACAAACAGCTGCTCTCTTCTATCAACAGACAGCTGAATCTGGGATGTTGTAACTACTATGCATT  
TATTGTTATCATTACGCAACACGAGAACTAGAACTATTTCTTGTGGCCACAACCAGCGTGTCTCCGAG  
CTCCTAATGGAGATATCTCTTTCTGTCTGCATCCTGGTATGGCCTTAGGATTTTTACCTGAAGTTCCTCC  
TCACCCGTCTTACACTCTCGTTCTTGAAGAGGAGTCTCTTTTAGTGCTCTATACCGATGGGGTGACTGAA  
GCAAGCAATAAGCATGGAGAGATGTTGTGAGAAGAACGCTTAAAAGCATTAGTGGCTTCGTTGACGAAAC  
AAAGTGCCGAAGAAGCCATCCAATCTATCATGTTCTCTATTAAGTCTTTGTGAAAGATTGCCACAACA  
TGACGATATCACTTTACTCGTTTGTGAAATACCTAAGGAACCTTCCGCTTATTAGTCTTCGCATATCTTA  
AAAACCTCCCTAACGAATCCTTGTAGATTTTTTCTTTCTACTTCTTTATCGTGCCGTTAAGAAGCTTTT  
TTCAGTTATCTTCTCTAAAATATATGTTTTAGGTGCGGAATGAGACAGACATTCACAAAAGAATCCTTC  
TTTTCTTTTCTTAGTGATTCTGCTCCTCTCCTTCTCAATCTCGTTGTCCTTTCTTTCTTTTCTCCTCGC  
GGCTGTAAAACAACGATCATTAGGATCTGCATACCCGCACAATGAACTTTAAATTTAGAACTCGAAAAG  
AAAATCGCCATTCAAAATATTTTTCTGAAACGTTTAGCGGAAACGTTAGCATTAAAACCCTCACAACT  
CACATGATTTTTTCTACTGAAGCTTATAGTGAGATGATTGCTCTCGGAGATACCGATTATCCCTCTGCCT  
ACTTTCTTCCGCTAACGATAGCATCCGTACAAAAGAACTCCTCGGGATCCTTTTGTTCGTTATATAAAAAGCT  
CATCCAAGAAATACGTGATAAGCTTATCCAAAATCCTGGGAATGCTAGCCTTATCTCTATTTCTGAAACGC  
CAGACACCGAAGATCATTACCTTGTTTTGTGAGAACCACCTTCTATCTACGAAGACCCCTCATTAGCCGG  
CTGGGTAATTGCTTTCTATTCTGATGCAAAAACCTACGCAACTATCTCTTCCATAACAAAACAACTCCTATCAA  
GATCTTCTTTGTCTATCTCAACCATAAGGGAGAAGCTTCTCTTTTCTAGACTCATCTCCTTTTCAAAAATGGAG  
CTTTTCTCTCTCCATGGAAGGATATCCCGCTCTCTCTTTCAGAAAAGCTTCTTATCCTTTTAGAACCTTC  
TCCTGAATTAATTTAAAGCTAAAAGAACTGTAAAAGTTTCTCATACACGGGAAAACTTTCTTAGCCTATTTA  
TCTCCTTGGCAGCCTATACCACATACCCATTCTCTTGGCTGATCCCTCTATCCACTTGCATTACACAAG  
CCTTACGGCTTCCCATCAACGTAATCTTATTCTATATCCTCGCTTTTCTTTTGTATGGGATGGGTGCTCTC  
TTGCAC TAGCAACGATTAATTCGTCCCTTACAAGAGCTTTTCTGTCTAGTATGGAATCCGCGTGAAAGGC  
AACCATAAATGTCCGCTATGAGCCGCAACCTTATGGCTATGAAATCAATGAAGTGGGGAATATTTTAACT  
GTACTTTACTTCTTCTGCTGAACGTCAAAGAAAAGCTGAAATAGAATATAATTTCTCGGAAATTTATTACA  
AAAAGAGCTTGTCTTCTCTCTTCTTCTTAAAAGATACCCTTCTCTGTCAACGTTTCAATTTCTCTCCAGGA  
GGAACTTTCTCTTTTGCATTATTTTACAAGGAGAACAACAAACCCGGATATTTTATGTTGGGTGGCCACTC  
CTGAAAAGATCGCCTCTTCCGAGTGATTGGAATAGCTGGAGATATCGGACTGCCTTCTTATCTCTACGC  
ACTCTCTGCCCGCAGTTTATTCTTACGTATGCAAGTTTAGGCTACTCATTACCTTCTATTTGCCAATAAA  
ACGATGCGAAGCTTTGATGAAACAACGTAGGCAATGAAGCTTCTGTTTCTATAGCTTGTCTTGAATACG  
ACCCTTCTTCCAAGTCATTGTCTGTCTAACAGAAGGTGCTAATCCTCAACTCTATTCAATAAACGACA  
AGAACATCTCCTCACGATGTGAGAACAACAACGTATTGAGACCGGAGATATTCTTGTTTGCCTTACTGGA  
GGCCCCACATCATTCAGTACTTGAACAACTCCCTATAGAAGCATTACTAAAAGATCCTCTCGCTCCAC  
TCAATTCAAAACCTTTGTCAGAGATGTTAACAACGATGCTGAGAAGTAAAATCAACGCAGATCGATGG  
AGCTGTAGGCTTTTATCCCTTATCTAACAGTCTCTCTCTAACTAATAAAAAGCCCTTTCGGCAATCCACTT  
CGATAGCCTGGTGGAGGGGCCATTCGTAATCTATGGGATTCCGATACAACGCCCAAGGATCTCGAACAG  
CAAAACCATCGTTCTTTATTTCTGAAAGGACGTCCACCAATCCTAATAATAATAATAATAATAATAATAATA  
CTCTTGGGTTCCAGGATGCAAAAATAAACCAAAATACCGGTAAGCCCAATTCGTATCACCAAAAAGAAGC  
GGAGCTGGATAGGCTAACCATAGTGACGCATAGCAGCAATCAGCCTCATAGAAAATGATCTTCTTCATGAT  
AAAACAGCTGATACCCAGCCATTAAATAAACCTTTTATACAGATGTCTGAGATCCGAGGAAGATAATAGCGA  
ATGCTTCCCTACATCTCTTCTAGTAGGGTAGCGAATCGATCATAGGATATCCGAGAAAGAAATCCCATAA  
TAAGAAAGAAAGATCACTGATAATCTGGGGTAACTGCTGTTCAGAAAACATAAGGCGCTTCATGTACGAAC  
GGCTCGCTAAAATAATTTCTGTAAAAGTAGCTACTACTTTCTCATCATGAACAGTGCAGTGAAGAAAACGCGA  
GCTCTTTTCATAGAATTCAGGAATAGATAACGAGAGATCATCAAAAATATAAGAAATCTTGGGTAAGT  
TCTTGGAGATAGTACCGTGTACAGAAACGTGTAAATAAACGCATATATTGCCGATTTATCTGAAAAGAGTAC  
GCTTCAAAAATCCTGATGCTTAGAAAGCCACACATCTCTCAGCCAAGTATAGCTATACCAATCATTAGT  
CCATGCATCTCTAAAATAACGGAGCTCCTGCCGTAACAAGAAACACATGCGAAGGGGCTGTGCTAAATAA  
GAATGATCCCATTTTCTACATAATCTTTTCACAGCCTCAGGAAGATCTTTTCAATGCATCAGCAAAAATG  
CTGCCAACTCATGCGGATCCGCAGGCAATTTTTCTTAGTTTGTACGAGTGGTTTCTGAATTTTCAAAAATAATC  
GCCTACTAAAGTCTTACTGTTCTCCAAGAAACATAAAACCAAGGGGTATGCGTAACTTGATCTAAATGC

TG GAAA ATCCCCTGTGGAATAGGACAATTATAAGC TTTCAAGATCC TTTCCATTGCAGCCTCCT GAAAAC  
GAGGCTCATG TAAA GCCGATACAATACGATG CAAAAGAATAGAAG TTTCTT TTTCTAATCCA GAAACATT  
ATGCTTCGCTAGGAGATCTCCTTCTATAGAAG TAAA AACTCCGT CAAAGCATGAA TAAATTC TTCGATA  
GAA TAAA TCGGCTCCACGTGTTAGGATGACTCCTCCCATAGG TAAA TAATATAC GAAAGCCCGCAGGAA  
CATCTTGATAATTCCCA GAAA ACTCTCTAA TAAA AGCATCGTATACGCTACG GAAA TAGTTAGGGA TTTT  
TCGTGAA TAAAAAGACAAGAGAAA GTCTGGTAGCATGATCATT TTTT CAGCTTCTCTTGCGCAGCATTC  
CAATCTTG TAAA GCTTGATTCAAT TCTTGTC GAAA ACGCACATGATCCATAGCCAGAA TTTT GCTATCTT  
G TTTA TTGATCGGATTACGCATCCGAC TTTT CACATATTCTAACTGCGCT TTTT GCTTCTTGATATGTCTC  
TTCACATTGTCTG CAAA GGCTTGTGTCGTAGCTACTTCTTCTGC TAAA AATCTACGTATAA TTTT CACGT  
AAA CCATCCTCATCATCACTGGTCCAACC TAAA GCAA TTTGTAAA TGCTGGTGGTTGTTG TTTT GACTCG  
CATCTGCTAACGTTGCTAACGTATATCCCACGA TTTT CAATAATACATTCTGTGTATCACGA TAAA TCC  
CAGT TTTT GCTTGTCTGTAAGATTC TAAA TAGCTAAGTACACGTTGACTATTCTGTAGACA TAAA ACCGTA  
CCATCCCCTCGCTC TTTA CCGAAA CCTTCTG CAAA ACGGAAGCTTGCCTGTA GAAA GAGAAA GCTGAT  
AGTGATGTAA CAAA CTATCCTGAATGACATCATGAGCTGTTATCTTCCCATGAATATCCTGAACT TTTT  
ATAGA TAAA ACTCATTAGCTAGTAGCG TTTT GACCTCACCTGCGATATCCCCTGTTGTTG GAAA ATGCCA  
GAAGCTACGAATGCTGCTTG TAAA TCTGACGAAGCAGCAAGAGTAGCCACAGGATTGGGATATAAAA TCCA  
TTACA CAAA TAGGCT TAAATAAA TCTCCTACACACGGTAGAAGATTGATCGGAACG GAAATCTCTCGATC  
ACCAACGATACGGGATAT TTTT CCGGAAGATAA TAAA TCTT CAAA TCACGAATAAA TAATAATGGATAC  
TCCCAGTGGATAAGAATTGCTAATGCTGTTGC GAAA CAAGATCCGACATCTTGTGCG CAAATAGG TAAA TA  
ATGCGAC TAAA GCGGCTTACAGTACATGCCGTACGGTTACTGTCTCACTAGCGGGCAGCGCTAACGTATT  
CCGAAT TAAATCTTGAACCTAGCGTAAGAAGGTA CAAA AAACCTTC GAAA ACGATT TTTA ATTTT TTTGA  
TCATCCCG TAAA AACTCCAGCATC TTTA ATACATGCTCACGAATCGGCCCTTCTCCCTGGCGATACGGTC  
CTAAGGATATAAAA CA TTTT GTCAACAGCTGAATAC TTTT CAACAACCTCGACTAAGTTT CAAA TCTCCTT  
TTCATT CAGGATATAACTGGCTAACTTCTTGC AATAGCAAGATTTTT TTTT TTTT TAAAGCAAC TTTT GCTA  
TACGTTGT GAAA TCTTGCAGGTTCTCACCAC CAAA ACCTCCTCCAGTAAGGAAGCTT TTTT TTTA TTAG  
CTAAGGAAT CAAA TACA GAAA CATC CAAA CGAGACATGACGAAGAAA GGAGTTT TTTT TCTCCC TTTACC  
ATGGAA TAAA ATTGCGATGCAATCTT CAAA CTTAAGAGTCCCATCTC CAAA AACTCTCTGTTATTCC  
TCTGTTTT TTTT TTGAATAACGAG GAAA ATAATGCTCG CAAAGAAA AACGGGAAA CCTCACATCCCATAG  
CT GAAA TGCT TTTT TGT TAAAGGCAACT TTTA GGACATACTCGCACACAATTATGAGCCTGCCACATCC  
TTCTATTCTCGGGTACCCATCAATGCTCGTAACCGACTCTCTCGACG TTTT TCTCCAGGATAAGCGTTA  
AAATAACGCGCTTGGCGCAATAGCGGCTGGCCCCA TAAA ATCACTTT TTTT CATTTA CTTGTGGCAGGCTT  
CCGTGCAACAGCCACAAGTCATACACATCGA CAAA GAGTACAT TAAAG TTTT GCTCTTCTTGAGAGAT TTT  
AGGGCTGCGCCTTCCCACAT TTTT TCTGCAGAAA TCCATCCTTGAATCTCTT CAAA TTTT TGAACATA  
ACAGAGCGATCTACAAT CAAA TCTCGCAC TAAA GGGAACTTAGAAA GAGGGGCTAACTTGATCTCTCTTT  
TAGCATCCATATGCTCATGAATTAATGCAAGCTTGTCTTGGAAATACCATT CAC TAAA ACTGCACA  
AGAGCCA CAAA CCTTCTTAGACAAGCCTGTTCC CAAA CAACAGGATCCACACGCTCTCCATGAATA TTT  
ACAGGATTCT TTTT CA TTTT CATGAGAGCACTGATCACATTCTCCCCTGGGTGTAGTTCCAAC T CAAA AC  
TTT CCAATATTA TTTT CCAGGAACGCCCTCTA TAAA TATT CAAA TAAATGTCTC TTTT CAAA TTAGCCTC  
CTATATCGG GAAA TGAATATTGCTGGAATATTCTCTAGCACGACATCT TTTT GCTCCCTGTGAGTGTAA  
TCTCGTAATTCTGGATT CACATGGCGGGTATCTAC TTTT CTATAT GAAATTTT TGGCTCATCTACAGAAT  
ATGTAGCGATCGTAGTT TTTA ACCAATTCACATCATCTCG TTTT CGAAA ATTCTGG TTTT GTAATGAGACCC  
TC GAAA TTTGTTT TTAATAAA GCTCCTGTGCTGATAGCTAGTGCAAGCTCTAACATAGGTTCCA TTTT GT  
CGAA CAAA ATGAAA CGT TTTA TTTC CAAATCGAGAAGAATCGTGTACC GAAA CTTTT TTTA TTCTTTCTC  
TAAA CTCC TTTA ACTTGTGTAGAG TTTT TTCAAGAGCCTTGTCTCCCT TTTT CAGGTCACATTACTGAC  
CATGACTCGCGGATCTCTTCATG CAAAG CAAA TGCAT TTTT CCTCCTTGACGAGAGAGAATCTCTCGA  
GAGATCTCTTGCTCTTGTG CAAA GCTTGATTAAGATCTTGTGGGAATAGATACAACTTCCGAACGATT  
CCA CAAA TCGTGCCGCTTCATCTCCTGCGACTAACCAGCGTA TAAA CACGCTAA CAAA GAATTAGCTCC  
TAAA CGATTGGCTCCATGATATT GAAA ATCTGACTCGCCACAAT TAAA ACAACCTGGGATATTCTGTCATA  
TGTCGATAGCGACTATCGCGATCCCTATCGTCACTGGCAGGCCAATCTACCCAGGCGCCTCCCATAGAAT  
AGTGCACCGCAG GAAA AATGCGCATAGGGACTTT TTTA GGATCTT CACCTG TAAA TTTA TGATAGATATC  
TAAA ACAGCCTCTAGCTTATT CAGAGTCTCTACAGGTAGATGGGTACATC TAAA AACACTTCGTGACGA  
CCATCAATACCCAGACCTGCCTCACATACCTG TAAA ATAGCTCGCGCTCCGACATCTCGACTCAC TAAA AT  
TGCCGTAAGCAGGATACATCTCTTCTA GAAA ATACCAAGGCTTGCCTGTCTCTCCGAAGGGCGTCGCGA

ACCATCAGGGAAAATAATCGTTTTGGATGAACACCTAGGCACCCAAACTCTTCCTCCTTACCACGAACC  
GATTCAGGAAATCAAACGCAACTTATCTAGTCCAGGAATTGCTGTCCGGATGAATTTGAATAAAATCAGGAT  
TCGCATAGTGCATGCCTTGCATGAATAATCGACCATTTGCAGCTCCTGTACAGATAGTCGAGTTGGTAGA  
CATTTGAAAAATGACACCCAAACCACCCGTTGCAATAATCACCGCATCACCTTGTATAACCTCTAAACGG  
TGATTGAATTAAATTCATGACGACAACGCCACAAGCTCTTCCTCCGTATTGGTAATCAATCGAACAAATT  
CATGATTTTCTCTTTAATGATCTTCCCTTGCCATTCACGACGACGTACCTGCTCATCCATGGTGTACAT  
CAACTGCTGCCCTGTGGACGCTCCACAAAAGACTGTGCGATGATAGAGAGTCCCTCCGAAACGCCGCACA  
TCGAGGTTTCCATCTGCATCACGGTTAAATGGACACCCGAACCTATCCAGCATATGAATAATGCGTGGAG  
CGGTTAAACACATTTTCCAATACAGGAGGCTGATCTGCTAAAAAATCCCCTCCTTTATCGTATCGTAAGC  
ATGAATGTATGGGGAATCATTTTCTCCTTTGAGATTCAAGGCTGCATTAATTCCTCCCTGTGCACATACA  
GAATGCGATCGCTTACCTTAGTTAAAGAGAACAGCTCTACTAAAATACCACGATCTGCAAGTTGCATAG  
CGGCAGATAGCCCAGCAAGTCCCCCTCCAATGATAATGACTCGACAACGCTGATTCATCATAACAAATAC  
ATATTCCAAATTACGCTGATACCCATAGCCATCACAAACACACATCCCTACGTAACATAAGATCTGACATA  
ATCGGAGATAGCGGAAGAGATAATGATTCCCCATCGCGAGACAAACGTCCATACTCCATTAAACCCATG  
GAAAACAGCAGCTATAACAAAAAAGCGTATAGAAAATTGCCATCCATAAAGATCCTAGAGCATTTCTTACT  
GCATAGAGAAAAGCTTTCTTGCTTCTGGAGTAAAAAATGTACGACTTGTGTGATGCAAATAAAGCTCGGT  
CTTTTTCTTGTATAAAAACCTGCTCCGTAATTTGAGGTCCCTCCCTCAGCAAATGGAACATTCATAATGAAGAA  
GCCTGTTGTTCCCTGTACAACAGAGGGATATCGAGCCGCATCAAAAGAAACAGCATAAAAAAGTCTTTCT  
TGGATTGTAACCTGAATAGGATACAAGACAAATCGAAACTGGATTACATGAAAAGCCAGCCCCGGCTAATA  
AAATCCATGCCGTCATCTCTGTAGAGTATATGCCAGATTCCCTCCCGTAACGTAGGTGTTCTTCCATCTG  
AAGAGGAAAAAATTCCTCTCCCTCGAAGAAGATAGCTAAATCCGATGATGGAATGAATACCAAGCGGAAG  
AGCTAAACAGGTAATCTCAATTACCTTCTAGACCAGGAATTTTGTGAAACAGATCACATAAGGTAATGAAC  
CCTTGGCTTTTAGGCTAAGAAAGAAGAGGCTAAGATATTTGTAAGGAGATGTTTACACACAAAAATAAAGTAA  
ACACACATCCCGATACGGAATGAATACATCGTATAATGAAACGAATGTAGGAAGATTTTTGTTACTATCTC  
CCTCCTCATATGAACGCCTCCTTATTGCGCGTCCCTCATGGTTCCTGCCCTCCATAAAGAGCCCTCCTC  
AAACATCATGATGAACAGCGCACTTAATCGCGACGTTAACAAACAGCAGCTATATCCCTCAACTGAAAGG  
CTTCCATCCCTAATTCTAGGAACCTCGTAACCAACGTTGCACATTTGTACTAACAGCGTCTTGCATTTCA  
TAAACAGAAATGCCTTTTATCTCAGCAATACCGCTAAGGTATGCACAATATTTGTCTGGTTCGTTTCT  
TACCTCGTAAAGGTGTAGGAGCTAGGTAAGGAGCGTCTGTTTCTCACTAATAATCTCTCTAAAGGAATCTT  
CTCTACAAGATCCTGCAAGCTTTTAGGCATTTTTAAAAGTCACAATGCCACTAATAGAAATTATACCAATCA  
CGCGCTAATAACTCTGTGCCTCTTATAAGTCCCTGTAAAACAATGCAACATAACCAGGTTTAGGCTCGCT  
GATCCACTCGATATACATGATCTAGGATATGGAAAAAATCTTCGAAAGCTCCTCGGCAATGCACAACGAG  
AGGGAGTTCGTGCTGCAAAGCTAGTTGTAAATAACGACAAAGAACTTCTTTTGTGCTCTTGTTCAGAG  
GCTTGCACAGCAAATAAATAATCTAATCCAACCTTCCAATAGCAGCGAGTTTCCATCTTCTGCAGCAC  
GACCAAAATTCCTGAAAATCTTCCCTTATATCATCTGCGCATCTGGGGAGGAGTCCCAGCAACATGATA  
AAACATCCAATCAGGATAGGCTTCTGCATAAGCAAAAGACCGTAACAACCTCAGCTTTTGTTAGTCGTTACA  
TTAACTACCCTAGTCACTCCTGCGGTTTTGCCCTCGTAAAACGACATCTCCAAAAATCCTCTATAAACTCTT  
CGGATGAAAGATGTACATGTGCGTGCATCTCCATACTTCCCTCATAATCAATCTTTCTCAATCAAAG  
ATCATGAAGGAAGAAGCCCTTTTAGGCGGAAAATGTTTCTTACTTGAATCGTTCTACTGAGGAAAAAACCATC  
TCTTCCAAAGAGATTTGCGATAATCTTTCTTGGAAGAATAAGCGGAGCTTTGTTCCCCGAGGGTAATACA  
CATAAGAAGGTACACTGGCTCGGCCTAAACGAGCGAGTCTTCTGTAATTTTGTGATCTTTTTTCTGTCCA  
ATCTGCTTCTAAAGTAACCTACGCCCTTAGCAGCAAAAGCTTGCATATTGGCATGAAGAAGAGGCTTATTG  
AGTTGACACGTTAAACACCACTTTGCAGTGAAATTTACAAAACCTGGAATCCCTTTTTCTCGCGTAAATCAG  
CTAGCTTTTCTGGGAGAAAAAGATTGCCAATCAAAGCTATGTGCAGGAGGGACGTTCTCATCAAAAATAACG  
GACACCTATAGAGGTAATCACTAAGGAACTAAAATACAGGAAAATGAATACAACGGAAGCAAGAAGCCGC  
TGATTACGCGGAGATACAAGGGTCCCCATCTCCCTAGAATCCATGCACCTACAGCAGCCAACCACAATC  
CTACAAGAAGAATAGTTACAGCGGTTGCACTCGTCTTACCCCAAAAATCCAGATAAGCCAAGTTGCAGT  
AGCAAGCAACATTAAACCAGTCAACTGTTTAAACGTACTCATCCAAGGACCAGGTTTAGGGTAAAATGGCT  
AGCATCTTCGGAAAAGAAGCAAATAATAGATAGGGACTTGCCATTCCTAATCCTATAGCAGTAAAAATTG  
CCAGCTGCTTAACAAAAGACACTGCCATAACTAATCCAAATACAGAGCCAGAAAAGGCCAGTGCAGG  
AGTTGTAACCAGGGTAGTCAACATCCATTGAAAAAAGCTCCCCAGATCTGATTCCTTACCAGATGCC  
CCTCCCTCTTCTTGAATTTTCTCCCTAGGCTCAGACAAATCAATCCCATCTCAAAAACGCCTAACGAAC  
TCAGAGCAAATAAAGAAGAAGACAATAATTAAAACGGCACAAACATGGGTTCTTGAAGCTGGAATCCCCA

TCCAATATTTTCCCCTAAAACCTTTTAAACAAAAACGCAAAAAAGCGAGTCCCCTAAAAGCTTACAATAGCT  
CCCTAAAGTAAACCAAAATCCCTCCAATCACAGAGGAAGAATGGTGATCTGCCGCCGATTTTAATTAAACTAA  
ATACTTTTCAAAATAATCAGAGGCAATACACAGGGCATGATGTTTAATAAGATTCCACCAATGAAAGCCAT  
AAGAAGAATAGAGAGAAACCCCCAGCTCAATGCCGAAAGCTGTTCGACTTGATTCTCTTCTACTTGATAC  
GAAGCGACTACTTTCCCTGCATCATCCTTGAATATAAGAATCCCTGACAACCCAACACCCTTAGGCATAT  
TTCCCTCAGGATGTTTCAACTTCCATATGTACGTAGTTCGCTTGTCAAGAGGAACCTCTTGAGCATAAGC  
AAAATCTCGCGTGTTTTCAGCAATGAACCATGCCTGGGTTGCCCGATCCGCCTTTCCTGCTGGCACAAGA  
ACATCTAAGCCATCAGGCTGATAAGAAATCTTTATGGCAGCATCAAAAGGTCGAGGTTGAGCCGCTAACG  
CACGGGAAAAGGTGAATGTCTCTTTACTATTAGGAATTAACGGCCCTGATCTATAGGAATCACAAGAAC  
CCTTGACGAAGAACCTGGGAGACAAGATGCACCGCAAGACAACCATTCAACTTGCCTTTTATCTCCAAT  
GGACGCGTTTCTATCTCTTTAGAAAACGCGAATATCCGCAACCACCATTGTAGAATGTTTATAACCAAAAT  
AAAACACCCCATCTCTTTCGAAAATCTCTGGAGTCGGCCAATGTTCTCCAGCAACCTACATCTTGATGG  
CAAAATCCCAAGAAATGCGCAAAAGGCATTCCAAGCTTCCCTGGATTTTTCCAGTAGATATGCTCTCCTTCT  
GGAATAGCAATCAATACTCCGATACGAAGCACTTCTCCTTCAACAGCTTGTTCGCCTTACTAACAAGTT  
CTACTGTAGGCGTAGCTCTTCCACTATTTTCTTCTACACCAAAACAAGACGTATAGCTGAACAGCAAGCA  
AAGAAAATAATCCATACCATTGCCGAATCATAAAACACAACACTCTCTCCGGTTTAGCAAAATCATCAAA  
CAGAAGAGTTGTTTTTGTTTTGTCAATTCATTACACACAAAAAAGGATCTTGGTCTATAACAAGAAATTT  
GTTAGGATCGTCTAGGAACCTCGTTGGTTAGGTCTACGTCCTTATGTTCCAACCTCGTAAATAATCCCATCA  
TTCAGTCCTTTCAAGAAGCCGATCTTTTGGAAAAGTCAATTTTCTTTTCGCTGTTGCTCTTTTCGATATG  
TACATGGACAGTCCCTTCATCAGAAAATCTCTCCATTCAAAAGAAATTTCTAAAATCAGGGAATCTTTAAAA  
GAGTTTTTAATAAAAATAATCGTCATTCTCTCTCTCTTTTAGATATTCATCCTGAATCCACGCCTTTTACAG  
ACCTCTATTTTACTATCAAAACGTGGAACCCTGGAATTAAGATAAGAATAGACAGTTGGCTCCAGAACG  
AACTCCTTTGTCTTTCGCTGGAAGATATTCATCGTTGGAAACGCTTTTAAATGCAGTGATGCCGAAATAT  
AGAGCTCTCTTAAATAAAAATAAATTCATTCCAGCAACGACCATTAGTCTCGCTCCTTTTCTAGGACTAT  
TAGGGACCGTTTGGGGATTCTATTAGCTTTTGGCACATTAGTACCGGACAAGCCAATGGGACGATCAT  
GATGGAAGGCTTAGCAACAGCATTAGGAACAACATTTGTAGGGCTATTTTGTGCCATCCCCTCACTAGTA  
GGTTTCAATTATCTACGCGCCACGCCTTCCAAGTCTCTCTGGAATCGAGCAAACTGCTTTTCTTTTAC  
TTAACTCTATTGAAGTCAAAATATCGAACAACTAGCTTATGAAACGCTTTCGTTTACGAAGATCTAGAAGAA  
GACCCTAGTGTCAATCTTACTCCTCTGATCGATATCGTCTTTGTAATTTTGTATGGCGTTTATGATCGCCA  
TGCCCTTTATTAATAATGATCGTATCTCTTTAGCCACAGGATCTTCTCACACCAAGCCTTCAAAAACA  
AGAGTCTCAGCAAGCTGAAATTAAGTGTTTTCGAAAACCATACCATTACTCTCAATGACCTTCTGTGTCT  
CTCCAAGAGTTACGCTCGCAACTAACAGTCATCCATCGCGAACACCCTAATATAGTTCCGCTGCTCTTAC  
AAGACGGTGATACAGCTTTTCAAACTGTATCAAGAGATCAAAATCGACTATCGAAGAAGCCGGATTTTCAGGA  
ACTTCATATTGCTTTGAAGAACTAATATGCAAAATTTTCAATATGCCCTTTTCTTTGCGCTCTATAA  
TCATCCATATTGCTCTTGGAGGAATGCTCTTTTCTCCGCGCCTCAAAAAGAAGCCTCGTCTCTCCCC  
TTTTAAAGAAGTATCGTCCCTACCCCTGAACCATAAATCACTACCCTTTTACAGACTCCCTCTCCA  
CAACCTATTCGTAAAACCGTAAAACAGCTCCAGCTCCCGAGAAAAGAGCTGCAAAACCTCCCGGATCT  
CTAACCTCAAAAATCTCCTCAAAAACCAAAACGAGTCTTACGCCGCGTAATGAGACACTAGAGAA  
AAAACAAGCTACTCTCAAAAATTAGCTCAACTAGCTAATCAGCTGGCCGAAGAGGCTGAGACACAAGAA  
TCCCACATCGCACAAATTTTCTTGGCTGCTCAAGCGCAAGTTCTTACTGAAAACACATCCTATCAGCAAG  
ATGCCTTCTGTGCTTTTATTTTCAAGCAGTACGTGAGTCTTCTTTTCCCTGGAGAGGTTTCGCCATAA  
ATTTTCTAGAGAAGGCGCTCTTCTCCATTGCTCAATCTTATCTACTATTAGCCATGCTGATAAAACAAT  
ATCCTGAACCAAAATTCAGAAAATTCCTTTTCAATCTTTTCTTTAGCGCATACAAAACCTCGAAAATATCG  
TTTTTCTATATTAGACTGCAGGGAATTTCTGCTTGTATGAAAGGCTCCGTTGTGTTTCTCCGTTCTCTTCTC  
TGCTACTTTTGTCTCTCCCTTCCACTCTCCACTGTGAAGATTTTGGAAATTCATGTACGATCAGAAAGCT  
CTCTCCTTCCAATCGCAGTCTCTTTTGTCTCTCATCACAAAAGACTCTCGTCAAGCTTCTTATCTTGCATC  
CCTCCGAGACTTATTTTGTCTCGCAATTTTGGCTTTAGGAGACCTGTTGGCGCCTACAAAAGAGCTGGCTCCG  
CAAAAGATCTTTTATAGAAGCGTCTATCCAGAAGTATTTTCTTTTAAAAAAGAGGGTAAAGGATCTC  
AAAAAATTTTCTCTCTAGAGCTCTCTGGAGATCCTTCTAAAGATCATCAAGCGATTCATGAGGCTGCAGA  
TCGCATCCATTTTCTTCTTACACGCGTTCTTGGAAATTAGCTCAGGAAAATTAATTTTTCCTATGTGCT  
ACAAAATCTTCCACAGAATTAAAAACAAGGGGAACCTCTGGTCCGTTGATTACGATGGACAACATCTTTTACC  
CACTTACCAATGAACATTCCTTATCTGTAACCTCAACCTGGATGCATATCAGTCACATTCCTCCGCTTATAT  
GTATGTTTCTCTACAAATTAGGGGTCCCAAAAATCTTTCGAAATACTCTGAACCAGCCTGCAGGAAAA

ATCCTTGCTATGCAAGGAATCAGTTTATGCCGACTTTCCTCTCCTAAAACATAAACTCCTCGCCTTTATTT  
CTGATAGAGACGGCAATCCTGATCTTTTGTACAATCATTCTACTAGCTACCGGAGCAATTGGCACACC  
AAAAAACTCCATAATGAAGCTTTTGAACACAAGGAAACCCCTCCTTTAGCCCTGACGGCACCCGTTTA  
GTTTTTGTTCATAAAAGACGGAACGCCTCGTATTTATCAGATGCAATCTCTCCCGAACACATTTCTC  
CTCGCTTACTAAATAAAATATCGAAATAGCAGTTGCCAACATGGTCTCCGGATGGTAAAAAAATAGC  
CTTCTGCTCAGTCATTAAGGTGTCCGTGAGATTTGTGTGATGATCTGGCTTCAGGAAGAGATGAGCAA  
TTAACTACATCTACTGAACATAAAAGAAAGCCCTTCTTGGGCTGCGGATAGTAACCACCTTGTTATAGTG  
CCGGATCTTCCAATACATCCGAACATTTCTGCTGAGCCTAATTACAAAAAAGTAGGAAAATTTGTTAT  
AGGATCAGGAGAGAAACGTTTCCATGCTGGGGAGCATTTCTTTCACACATAATAAGAAACCTCATGA  
GAAAGACTATTTTTAAAGCGTTTAAATTATTATTCTCCCTTCTTTTCTTTCTTCATGCTCTTATCCTTG  
CAGAGATTGGGAATGCCATGGTTGCGACTCCGCAAGACCTCGTAAATCCTCTTTTGATTTCGTACC  
TACTCCGATGAAAGAAATCAACAAGCTTTTGTGAAGATTTTGATTCAAAAGAGAGCAGCTGTACAAA  
CGAGCGCACAGAGTACCTTTTCCGAAATATCACTTTCTGCTACAGATAGTTATTCTATTAAGGAGAGGA  
TAACCTCACGATTTGCAAGCTTAGTTGCTCATTTGTCATAAAATCTCCATAAGCTACGCTATATATAGAG  
GGCCATACAGATGAACGTGGAGCTGCAGCTTATAACCTAGCTTTAGGAGCTCGTCTGCGAATGCTGTAA  
ACAATACCTCATCAAAACAAGGAATCGCTGCAGACCGCTTATTCATAATTTCTTACGAAAAGAATCC  
TGTTTATCCAGGCCATAATGAATTAGCTTGGCAAATAATCGTCTACTGAATTTAAGATCCATGCTCGC  
TAATCGCTTATTCTTAATAACCCTTTTAGGGTTAAGTTCTGCTGTTTTACGGCGCAGGTAAGCGCCGCT  
TTGAGGCTATTCTAGCCGAAGTCGAAGACACCTCCTCTCGTCTACACGCTCATCACAATGAGCTTGCTA  
TGATCTCTGAACGCCCTCGATGAGCAAGACAGAAACTACAACAGCTTTTCTGTCACACAGGATCACAACCT  
ACCTCGACAAGTTTACGCGACTAGAAACGAGCAAAAAGCTTTTGGCAAAAACACTGGCGATTCTTTTGC  
TCCGTCCAAGATATTCGGTCTTCTGTACAAAATAAAATTAACAAGAAATCCAACAAGAAAAAAAATTAG  
CACAAAATTTGCGAGCGCTTCGTAACTCTTTACAAGCTCTCGTTGATGGCTCTTCTCCAGAAAATTATAT  
TGATTTTCTAGCTGGTGAACCCCGAACATATTCATATTGTTAAACAAGGAGAGACCCTGAGCAAGATC  
GCGAGTAAATATAACATCCCCGTCGTAGAATTAATAAACTTAAATAAACATAATTCGGATACTATTTTTA  
CAGATCAAGAATTCGCCCTTCCGAAAAGAAATAGCTGCTCTTTCTAGATAATAAACAAAGTCTGCTGT  
AGGATCCCCAATTAAGGAATAACTAGCATGTGGGATGAAATTTACTGTTGCAGTGTTTGGCGAAGCAGA  
GGAGGGAAGCTTTGAGTCCGCATACCTCTGCTCTTACTAACAGATCTACATAACAACCTTGGTCATGGA  
CGAGACTCGCCCTCAGGTATTTCTGCTGCTGTGCAAGCTATTATGCAGGGATACGACATACTATTCTTTA  
GAGTCAAGGAAGAAGGCTTCTTTATTGATAGCTATTTCTTTTGGCCTTCAATTTCTTAACTCAGACTTC  
ACTAATAATATCGTCGCCTTAGCATTTGCCTGGTGTGCGAGACTTCAACATTATGAAGCCTCGCTGGCT  
CTCTGCAAAAATTAATAAGCCTTCTTCTTTCTAGATCAAGATCTGTACGACTTTCTTACTTTCAAAG  
ATGCTTAATCCATCGTCTGGAAGTATTCTTTAATCCCTCTTCAAGAGCCATTTCCACGCTCTCCAGA  
ACGCCAGTTAGCTGGAACAACCATCCGTGGTCTCAAAGAAGATCAATGAATCAATAACGCAATTC  
TCGTCAATGGAACGCCCTAAAGGAAGATCATTGATAACCGCATGACGAATAACCCCATGTTTATCGATAA  
GGAAAGTAGCTCTTAAGCGAGCGATCCTTCAAGATTCAAACACCAAAAGCTTCTGATATTTTAAAGA  
GGGTCGCTAACAGAGGATATTCTGTTCCCTCTATCCCTCCTGCATCTCTCGCTACAGTGAGCCAACGA  
GAATGTGTCTCAATGTCGTCAACGGAGCAACCAAGGACGACTGCACCATGCTCTTCAAATCTACCAATC  
TATCTTGAAGAGCATGTAATTCTGTAGGACAAACATAGGTAATAATCTTTAGGATAAAAGAAGAGCACTAC  
ATACTTACCACGAAAGTCTGCTAGAGAGATTTCTTTCCTTCTCCAACAACCGGCTTACCAAAAA  
TCCGGAGCCTGTCTTCCAATAATGATCCCATAGTACTCCTCCTAGAAAGAAAACAACGCACCAGAGAGGA  
TTTGAACCTCTGACCACCTGGTTGCTAGCCAGGTACTCTATCCACTGAGCTACTGGTGCATAGAAAATA  
TAGGGCAGAAGGATACCGTGCCTTCTGATAATGATCAAGAAATTTCTCCTCAGAAAAGAAAAACCTTCCA  
TTAAAGAATGTTTTACAGAAAATAATTGTTATTCTTCAAGATTTCTCTCTCAACATCGGCTCCTGTG  
AAGCTATAAAGAGCGCAGATGTTAACAACAGACCAGTCTGCCCACTGCATGACTTAAAGCATGCTGAAT  
ACAAGAGGCTCCATCAAAATCCCTTGCAAAACAATATCTTCCAATAATCCAGAACTCCGTAAATCCT  
ACTCGCCAGTCCGCTTGAAGAAAGACTTCAAGAAATACTTCTTCTTCCACTCTTCCGCTACGGGTAACGA  
TGGCACGAAAGGCTTCTCTGCGGCACTAAGCACAGCAAAGAAACCAAAACGCTCACTAGGAGAAAGAGC  
AAGCGAACAGAAATTTCTCTTGGCGCTCGAATGAATGCGCACCCACCTCCAGGCAAGCATCCTGATCGT  
AAAGATTCTGTGATGGCTCGTATAGAAGAGGTGATATAACCTATCTCCTCCTGAGGAATACAGTCTGCAG  
CAATATGAATACATACTTCGCCTGAAAGAAAGCCTTGCCAATCTCCTTCTCAACCTAGCGCTAGCCTCTTC  
TTCTGTGAAAAACTCAATTTATCCTGTAAAAAAGCACAGTGTCTGCCACTCTCTGCTTATTGTCTGTT  
TCTCTAGGGACAATAAGACTGGTAGAAGAAACAATAATCCTGCTACAAGCCTAATCGATTTGCGATTC

TCTCTTCCTCGCTGTCTTCGAAATCCATTTTCGTAGAGCAATGTAGCTCCGGTTAATACCGCAATGTCCTC  
TAAA GATTCCC GGGCGTGCTTCCAGATACTTTCACAGCACAGACAGG GAAA ACCCTCTCTATTTGATTTC  
ATTTTCAGCATAGCTAATAATTC TTTATCAAAAGCTTCTGCTACAATCACAAGCGGTGT TTTCCCTGCCT  
GAACAAC TGATTGAA GAAATGT TAAA AAAGATGGGTT CGAATAATGCAGCGGATGTTCACTCAC TAAAAT  
ATAAA CCTGGCTATATTCTACCGTTCCTGT TTTCCGCATGCGTAA TAAAGTAAGGAGAAGCATATC CAAAA  
TCCCACACAGCATGCTCTTCGGCATGCCAGTATG TTTCCAGATTCTTCATGTTCTTCTACGATATAGTAAC  
CGTTCTTCCCTCCATAACCCACTGCGCTAGAT TAAAACAGAAGCGA TTTCCGCTAT TAAAACGTCGCGCGAT  
ACTGGATACATACTGTATGTTCCAGATCGCTTAGAG GAAATG TTTCTCTATAAAA AACCTCTTGGATT  
TTCTTTTC TGCAAGAAGCATTCCCGGATGGAT TTTCCATGAGGATC CAAA CCTTTCTGGATACCTGTCATGC  
CCTCCGCTAATAACGCTTCTATTAG TAAAGCTGTGGTT TTTGCCCCATCTCCGAATCGCATAAGGATTCC  
CAAGGCAGTATCTCGGATGAG TTTCCATACCTATAT TTTCAAAGACATCCG GAAA CAGAATATCCTTCAGC  
ATACTCTGACTATCTTGCCTTGTCCGCGTATCCTGGACATTGTGAACAATCGTGC TAAA CCCATAAGGAC  
CGATTGTCTGAGAAA ACATATGAGATATTACACGCGCGCGGCGTAAGACTGCCTG TAAA CCTTGTCTTG  
GTCTC GAAA ACTATTAGACAAA CCCTATTCTCTATCAGCTGCAGTCTTGGATATA GAAAGGCGA TTTAT  
TCTTGT CAAA CAACCATC TTTGGATATCTATCAAGCATATTCTGGGAGAAGGAAGGGTTGTGCGTGTCT  
ATAAA TTGTT TTTCTACCTTCCGCACACATAGTTCGTAACGGCCATGTGATATACTT TTTGTGTAAA CAGA  
CATT CAAA AATTCGAATGCCCTAA TAAATTTTGAATTGCCTTACGTCGAGGCACCTAACCGATCTAATAA  
TAAGAAGGCTTGTCTACCTC TTTAGGGTATAAAGT TTTCAAACCTCC CAAAATCACAC TTTGTG TTTCC  
ATAGGAAGAAA TTG TTTAGGATCTTGAAGTACGAC CAAA ACTCCAGAACACAT TTTCCAT TTTAAATTTCC  
CAAAA AACCGCTCATACTAAA AGGAA GAAAATGGACGCTGGTAGCCGCGCT TTTATTTAACTCCTGAGC  
GACCTTACACCCATCCATCCAGGGAGCCCC TAAAAC TTTAAAAGGAAGCGTATAGCCTATCCCTATG TTT  
GTGACAGA TAAA GCTCCTATAATACCTGTTGTAGCG TAAA AATATGCAGACTGCGCATCTGGAATCTGAG  
GACTTGTAGGAACC CAAATCAATCCTGTATCAG CAAA AATCATGGAGCGCTTCCACCCTCGCATAGGGAC  
AACTGTCACCGAGGCATTGGGTGCATATCGAGCTCGATACAAT TAAAGCTAGTTCACCTGGTGT CATCCCA  
TAGCAATAGGGGATCGCAGG GAAA GCCTC TTTATCAGGGAGAGGGCCATCGACAAGATTCCCTCCCATAG  
GATTGGGACGATCCAGAACAATTAATTCCTTCTTGTGCTCGCAGATGCT TTTACGACTTGAACAATGC  
AGAAA TGAATGAATAGGACCGCACACCAATATCTTGTACATCGTACA CAAA AACATCGCAGGCCCTCAATG  
ACTTCAGCAGGAATCTC TTTAGAAG CAAATAGAGAAA TGAAGTGGATATCTTCTAAGATAGGATCATATC  
CTGGTGTCTCAGCAATGGATGCCC CAAAATACCCATGTTCTAGTGTGCAT TAAAGCACTGAGCTTA CAAAC  
CCCT TTTATGCTTGT TAAA AACACAAA GCGAATGTTCCCTTGTGCTGATTAATGGCTGCACTATGAGAAATC  
AATGCAACCCGCTTGCCACGTAT TTTCTCAAGATAT TTTCTTCTT GAAACACGCGTTCCAAGCCTACCT  
GTACAAGAGCATAGCTCACATTAG GAAATAGTAGCGCAAGGATCACTAGCTTACAGATTGT TTTCCATAAT  
CTCC TTTGATCTCTC TTTGACAAGG GAAACCTTATCTTCTGATT TTTGTTTT TTTGATCTACAGCAAC  
CCTGTTG GAAACTTCT TAAA AAAAAAGCTTAGT GAAAGAAA ATCTTATCGCCGCTATCATCCTGCCC  
ATACTCTCTATACAGAGGTGCTGT TTTCTTTTTTTGTCATC CAAA GGGAT TTTAT GAAA ATTCTTATAGCC  
AGTTCTCATGGATATAAGGTGCGC GAAAC CAAA GCT TTTCTAAAA AAACTAGGAGAG TTTGATATCTTCT  
CGCTGTAGACTACCCATCCTACCAACCCCTAAG GAAACTGGC GAAA CCCCAGAA GAAAATGCTATTCA  
GAAA GGCTTATTTG CAGCT CAAA CCTTTCCGTTGTGGACTATTGCTGATGATTCTATGCTTATCATTTCCA  
GCT TTTAGGTGGACTCCCAG GAAA ATTATCCGCTTCT TTTGCTGGAGAACAGG CAAA CGATAAA GATCATC  
G CAAA AACTTCTTGAGAACATGCGTCT TTTAGAAA ATACAATCGATCGATCGGCTTAT TTTGAATGCTG  
CGTCGC TTTAAT TTTCTCCT TTTGGAAA GATCTT CAAA GCTCACGCCCTTTCGGAAGGAACCTATTGCG TTT  
GAGGAACGCGGTTCCCTCAGGG TTTGATATGATCCT TTTGTTTGTAAA ACATGACTACAAG CAAA CTATG  
CCGAATTACCAGAGGCAAT TAAA AACCAAG TTTCTCACAGAG CAAA AGCATTAGT CAAA ATTACAGCCCTA  
TGTG GAAA CGGTTCTCG CAAATCACTTACTCGCGGG GAAAGAGAGTCTC TAAA GACCTCTC TAAA CTAGA  
ACGGAT TTTCTTGATCTCTGTAAGAATCTGCTCCGCTCTCGC GAAA TCCGCTTCGAGCT TTTGCATTGACC  
AAA GCTCCCTCTTGAAGAT TTTGTGTTGC TAAA GGCATCTCTATACTCACTGCGGAT TTTCCGAGTTAAGC  
GATGCGTAGGGCT GAAA GAACACGTCGAATCCCGTCGATCATCTATCTTCCAATTAATCATCGTCT TTT  
CCCTGTTT TTTAAGCAGATAATTAAT TTTGAAA AGTGGCAACACC CAAAGAACCCTCTATGTGCAGCCA  
ATGGAGACGGATGCGGGCAAGCAAGAACC GCATGTTGATGCTTAGTCTG GAAA AGCAGATTACAT TTTG  
CCGCGCAGCATTCCCCA TAAA CAAA GATTACGTGCGTCTAT TTTGAATCAA TTTAGTTACAATAGCA  
TCGG TAAA ACGTTCCCATCCTCGTCC TGCATGAGAGAAGGCTTCCCTGCGCGAACC GTAAGCACGGTGT  
T CAAA AGAAGAACACCTTGATCTGCCAGGCTTG CAAA CACCCAGATT CATTACGAATCCC TAAA TCGGT  
ATGGAGTTCTCT GAAA AATATTACG CAAA GATGGAGGTAATGCCTGCCCTCTAGGAACAC TAAA ACT CAAA

CCATGCGCCTGCCCTTCTCCATGATACGGATCTTGTCCAAGAATCACTACCCGCACTTGATCGAAAAGGAG  
TACTCCGCAAAAGCAGCAAAAATATTTTC TTTT TTTA GGGTAGATC TTTG CTTGTGCGTATTCACTTTTAA  
AAAAGCAAGCAACTGGGACCAATAAGGCTGAGACCATTTCATCTTTAAGCTGTTCTTGCCAAGACGGGGG  
AGTTGCTCTATAGTAAAAGCCTCGTGCATACACTCTCCTTAATCTAATGCATAGAGTATATGCATTCTCG  
AAAATTTTC TTTGAAACCCGAAAATATATATTACATACATATGCTTACATCCGAATTAAATGCAGCACAAG  
TTACCGCCGTCACGGCGCCACTACAACCAGTCTGGTCTTAGCTGGAGCTGGAGCTGGGAAAACCTCGAGT  
AGTCACTCATCGAATCCTTCA TTTA ATAGAAGAATCCCGGCTCGATCC TAAACAAA TTTA GCTATTACG  
TTCACGAA CAAA GCAGCTAACGAAC TAAA AGAACGTATCCAATCGCAATGTCGTGAGCTAGGATATTCAG  
ACGTACCTATGGTAAGCACATTCCATAGTCTTAGCG TTTA ATATCTGCGACGCTCTATTCA TTTG TTAGA  
TAGACAGTCAAT TTTG TTATTTA TGATCAGAGTGATTCTGAAA AATTAATTAAGCAATGCTTACGCAAG  
CTGAACCTCGA TAAA AAGC TTTG CAATGCAATGCAA TTTA CTATCTCTCAAG CAAA AAATCGCTTGCAGA  
GTCTGAAGATCTCGATTC CAAA GAATATCCAGACCCTACTCGCACC GTTA TGCTGAATACCAAGAACA  
GTTACGTGCTGCGAACGCTCTAGA TTTG GATGATCTGTTATTCTTAACA GAAA AACTGCTGCGCATACT  
GAAGTCCAGCAAGAATACGCTAATCATTG GAAA GCCTTGTGATAGATGAGTATCAAGACACCAACCAG  
CGCAATATCTCATTGC CAAA CGTCTTGCTGCAGCTCATAACAATATC TTTG TCGTTGGAGATCCCGACCA  
ATCTATATATTCTTGGAGAGGCGCAACATCTCTAATATCT TAAA TTTGAGCAAGATTATTCGCAGGCT  
TTAGTTGTTGCTTAGAAGAAA ACTATCGTTCTTGTGGACCATCCTAGAAGCCGCTAATGCTCTGATT  
AAAATAATTCTGCACGCTTAGAAA AAACATTGCGTAGTG TAAA AGGCGCTGGAGA TAAAAT TTTCTGTTT  
TACAGG GAAA AATGACCGGATGAGGCAGAGCAAGTCTTAGAA GAA TCTCTAATCTTCATTCTTA TAAA  
GATATCCCTCTCTGACAT TTTG TAT TTTA ATATCGAACGAAC TTTG AGTCTCAATCGTTGGAAGCGGCG  
TTCTTAAGCGAGGTTATCCCTAT GAAA TTATAGGTGGCA TTTG CTTCTACAAGCGTAGA GAAA TCCAAGA  
TATTCTTGC TTTG CTTGCTTAT TTTG TAATAACTACGACATGGCAGCC TTTG AGCGAACCATTAGCCTG  
AAA AAATGCGGTATTGGAGCTACCACATTAGCCGCTCTTATGAACTATGCCAAAATAACAGACCTACCTA  
TATTGCAGGCTTGTGGGACGTATTAGAGAAA AAATCTATCCG TTTA AC TAAA AAACAACAGCAAGGGCT  
TTTC TCTTAT TTTG ACTCAT TTTG CAT CAAATGGAGCAGCTATACG GAAA CTGCGATCTTCATGAATTCATC  
AAT GAAA CGATCCGCATCACGGATTACCTCTCCATCCT CAAA GAAGATCCT GAAA CCTATGAAGATAGAA  
AAAACAACCTTAGAGCAATTATTAGCA GAAACG CAAA ATGGGG TAAA AGCAGT GAAA ACTTGCTGGTTT  
CCTAGAAGATCTAGCTC TAAA AAGTTCCGAGAT GAAA CAGCAAGTTCCCATGATCGCCTCAAGCTCATG  
ACGATCCATAACAG TAAAGGGTTAGAG TTTG CTGTAGTCT TTTG TGGTAGGTCTTGA GAAA ACCTTCTTC  
CTCATGCCAACTC GAAAGGTATGCAT GAAA ATATTGAAGAGGAACGGAGATTGTGTTACGTGGGAATTAC  
CCGAGCACAAGAGTATCTCTA TTTA TCTCGAG CAAA AACCCGATTCC TTTG GGGAACGGAACGCACCATG  
GTCCCAGCAGAT TTTA TTAGCGAGCTTCCGAGGGCTCT TTTAAA TTTGTTTAACTTATGTTGCATCAGC  
AT CAAA CAGCATCTGTAGCTC TTTG TCCTGCT TTTA CATCTTCAACAGGGACTGGATATGCTACAGATGCC  
AGTTGCTGAACTCGCAACAT TTTG TGTTCCAG CAAA TCACTATCAATCCCTGT TTTG ATCTCGATAGCTTA  
GATTCTCTCCAGAATCTT TTTG GT TTTG CCTATTAGCGAACAGCATCCT TTTA CAGAAA CTCTATCCG  
CATACTTCTTCGG CAAA TTGATACCAAT TTTG CCTCTCTCAGGAACGTACTATAGCTCAGTATATTGT  
AGGCAACCTCTCCCAGAAGGACTCT TTTG TAGAAA ATCCTAGTCTTGTGGCTGCAGAT TTTAAA CGTCTCC  
GAACACCT TTTG CACAAGGTATGGCAACGTATCCAACAATTACATCC TTTA GAGGATCGGAGCGCCTTCCC  
TACAGTCTACTGGGTATCGCTACTACAGACATCTCCCATAAGGAGGC TTTA GCTATTATTGCAACCA  
TTTC CCTAGATTAGCTCGTTGTGA TTTG ACTACTATCGTAG GAAA ATGCATGCAACCACAACAGAGATT  
CTTACA TTTG TTAGACACGCT TTTG CTTCCATCCCTTGGTGTCCAGCAGCAGGCT TTTG CCGAGACACTGC  
ACCCCTGCTCCAGCGCTTCTGATGCCTACC TTTG CTTCTCGC GAAA ACTCTCTTGGGATGCTCTAT  
TAA TAAA GATTGTCTCCCCTCTATTAGACTCAACGACACCGTACTAGATATCTATCCTTCTCTCTCGT  
GAAGA GAAA GACCACCTATCGCAA CAAA TCCGAGCAG CAAA ACAATTGCTTCGCAATG TAAAAAACGAG  
AAGAAA CGTTATTGGCTATCCTTCGAGTTCTCATCCCTACCAAGAAGAGTTCTTCT TAAAAACGCAC  
CTCTCC TAAAGCTT TTTG TG TAAA CAAA TAGCTCGCGAACTCTCTTTCATGAAGCTACCG TTTG TCGT  
GCCATTGATAA TAAA ACGTTAGCAACCCCTGTTGGATTACTCCCTATGCGATCGCTA TTTG CACAAGCGG  
TTGGATCCTGCCCCGATCAATC TAAA GCAACTAT TTTG CATTGGATCCACCAGTGGAT TTTG TACA GAAA  
ACATCTCTATCTGATGCAGCTATTAGC CAAA AAAATATTGAGAAGGGCATCCCCGCGCACGACGCACA  
GTAGC CAAA ATATCGTTCGCAACTGAATATCCCCCTGCGCACCAACG CAAA CACCTATGCTCTGT TTTA  
CAACAACACGCACAGAGAATTCTCGACATACTATCTAATCGGATATG TAAA GCTGC TTTA CATCCCTTGA  
ACTA GAAATAAA ATG GAAATAAA AAGCCAGAACAAGAGAAGTTGTTCTGGGCTGACAGAAGCTGTCAGA  
TCAT TTTA ATAAGATTGATGACAACACTACAACAAGTTCTGTGGATC CAAA AAAGAATC TAAAAAGCCATA CA



AA GATTGCGTTACTTCTTGCGATGCCTCTAACAC TTTATCAGCGTCATC TTTGAGAAGCATCTCAATGAG  
CGCTTTTCTTCTCTAGCATGCCGCACATCCGCTTCTTCATGTTCTGTGAAATATGCATAGTCTTCAGGA  
TTG GAAAATC CAAA GTACTCAGTCAATCCACGAAT TTTCTCTCTAGCGATACGTGGAA TTTGACTCTCAT  
AAGAATA CAAAGCAGCCACTCCTGCAGC TAAA GAATCTCCTGTACACCACCGCAT GAAAGTAGCTAC TTT  
CGCT TTTGCTGCTTCACTAGGCTCATGAGCCTCTAACTCTTCTGGAGTAACTCCTAGAG CAAA CA CAAAC  
TGCTTCCA CAAATCAATATGATTAGGGTAACCGTCTCTTCATCCATCAAGTTATCTAACATAACTTAC  
GCGCCTC TAAATCATCGCAACGACTATGAATCGCAGA TAAATA TTTAG GAAAGGC TTTGATATG TAAATA  
ATAGTC TTTGGCATA CGCCTGTAATGCTCTTTA GTAAGCTCCCCCTTCGACCA TTTACATA TAAAACGTG  
TGTTCTAGCATATGCTTAT TTTG AATAAT TAAATCTAACTGATC TAAA AAATTCATA TAAACACCTCCATCA  
TTTC TTTCTTTGACTCCACGTAACCGCTTG CAAA AAAGGTCCGTATAAGTCCCTCTG TTTTCATCTATGCGC  
AAA GAACAATACTCTTCTCGAGAAGTAGGATATGAATGGTAGACCATATTAGGTGCCGTCTATCACCG  
CTAACGGTG TTTGCTCATTCCCCTCTCCATA CAAA CAACAGCCGCAACTGCTAAGGCATCTACAAGATT  
AC TTTGCGTCATCTGTAAGGGACGACC GAAACAATCTAGCGATCCTATATAGTTGTGTAATGGAGAAAT  
CCATACCAACACAGCCCGATACCCAGTACTCCACGCCGCAATTGGAGTAGTATGGCTATCTGTAATGATTA  
CGCTAGCTCTTTC ACTC GAAAATAA TTTCTTAAACCATTCTCCGATGCGATTACACGATCCC AAAATATC  
TTTAGGATATAAAA CAAAAGGCTGGTCCGTATTGATTCATCAATCCCTGCAGAAGGAAT CAAAATACCT  
TCTTT TTTCTGTTAGATATATCCCGCT TTTCTCA CAAA CAAA TAAGCATCCGCTTCTTTTTTTATCAACT  
CTGC TTTGCACATTC TTGCATCAGCGACAGCGCCTTCACATAAAA CTCACAATC TTTGAAGAGACA ACTAC  
CACACTCCGTTCTTGCAGAGGCGG CAAAGCCTCTTGCAAGATCTCTTGAAGCGAATCATGTG CAAA TACT  
TTACGTGT TTTGATCGGAGTTAT TTTCATAATAA TAAATACT GAAA TCCTCTGTATTACAAA TACATTCC  
TTCTTCCATCCTGATAATCGCGTGATAGGGAAAGAAA GTATCGCCCCAATATTTCT TTTTGGATATGTGTGA  
CAAAA CAAGCTTTCTAGAAGGT TTTGTTG GAAAAAAC TTTCAAAGAGCTCCGCTCCCCAAT TAAAACCGG  
ATGATT CAAAGATAGTGTCCATACTCTG CAAA GAA GAAACTCCTATGCATTGTGGTGGATGCATCCTG  
CGAGAAAAGACAACGATATCCC GCCCATGCTTATACTTGTCTGGAAGAGACTCCCAAGTCTTTTCGTCCCA  
TAATGATGGGATGAT TTTGGAATGG TTTCTG CAAA AAAACGTAGATCTTCGGGATAACTCCAAGGGAGCTT  
GCC TAAAGCTCCCATCACTCCTCTGGGATCAATAGCAACGATACCTGTTGCTTGGATCATA CAAA CATA  
CAGCCCAAGCAGCAGCGGCTAAGGCACGTCTGTTACCTTCAACCTGATGCACACGTAGATAATCAACTCC  
TCGATCATGAAGAGATACAGAACAGCCGATCG TTTCCCAATCACGATCGTCACTAT TAAATCGGCCAAC  
ATACT CAAAACAGAT TTTCTAGAATGGCCTATTAATACAGGACACTC TAAAACACGT TTTAAA CTGC TTTA  
CTCCATCCATCAATAACATCGACTGAACGGGAGCTTCC CAAA TCCTATTCTGGATC GAAAACA ACTTG  
CCA ACTTGTATC TAAA CTTACTTGAG CAAATTGTTCTAACTGAGACTCTCCCCAACGCAACATTTGCTCA  
ATAGGAGATTCTTCATAA GAAA GTACACAATCTGGTCTTGGAGGCAGCGAACACGAATGATTTA TTAATA  
GCCGTAGCC CAAA CTCTTTCG CAAA TGAGCCAT TTTCCAAA GAGCCTCCAGAAA CATCATTGATCCAACG  
AATCG GAAA TACTTCAACAGCTCGTCGAATAATCTCTGGAC GAAA TGTATCGATAGATAACATCAGGGCAT  
TGTTGAGCAGCCCCCACCCTCCGCTAA TAAA CG CAAAACAGGTTCTAGACGCTCCCACTCTTGTCTA  
CGCTTCC TAAATCT TTTACACGAGGATTGGTTGCTTGC GCCCTAAA TCAATAATAGAAGCTCCTTCTGC  
AAA GAGTCTCTCAGCATGGGCTGCGGCTCTGCTCGCCTCCAGAAA CAATCCTGTATCGGAGATCGAGTTA  
TCCGTAATATTAACAATACCCATAA TTTGGGTAGCAGAACC GAAA CTGCCTAACGCATCCTCCTCTGTCA  
ATGGATAAA TAGCAGCAAGCTCTG CAAACGT TTTCCATTACAAGAAGATCCTTC CAAA CG GAAA CGACG  
ATACGGACATAAAA GAAGCCATCATA GAAAGAATAAAA AGGTC TTTCTAATACCTTAGGATGTGGGATTGTA  
CA TTTG TCACTATGATAA GAAA AAGCTTCGTCTCCATA GAAA AGCACATCAATATCAATCGGTGAGGCC  
CCCAT TTTAAA GAAGCATCTTGTC CAAAACGAC TTTCTATCATCTTGA TTTCTTCAATCAACTCGTCTGG  
AGATAGCTGCG TTTCCCAATAACTACAGAGT TAAA ATAAGGAAGATCCCATTC TTTCCGGAGCCCCTTCT  
AACAA CAAAGCCTTCGTCTC TAAA ATCACAGAACTT TTTAAATTTCCGGATCCCAGCCTTC TTTAAA CTG  
CATAAGCGGTCTTATATGCTCATGCCGTTACC TAAATTTGGAACC CAAACT TAAACAAACAAA ATTTCCA  
ACTAGTCATGGCACCTCTCTACTTATGCT GAAA CTTACAGGACTGAGTAGATCTGGGATCGGAGGACGCT  
CTTTACTTACTCGCAAGTCAATCCTA GAAACTTGTCCAGC CAAA GCCT TTTCTATTT TTTCCAG CAAAAC  
CTTAGC TAAACGTTCAAT TAAAGCACAAGGATTATTCGTTGCAACTTCTTCAATAAGAGAAA CAAGCTCT  
GCATAACACACGCTATCAGAGAC TTTG TCCGTGGAACAAGCC TTTGGCTCTTC TTTAAAAAAAAGAGATA  
AAGAAA CAAGAACGGGCTGCGGATAATGCCGTTCTTGTCTGAGACTCCTATAGATACC CAAA CGC GAAA  
ATCCGCTATATC TAAA CGATAACAACACTCCTTGTAGGCAGCAAGACTAATT TTTATAACT TTTAATC  
TTACCCGAACCAATTT TTTCTTCTTCCAATAGATCTAGGAACGCTCGCAACTG TTTG GAACGGATAGGAT  
GACGCATC TTTCTG TAAAGCTTTA GCTTCAATTTG GCGAATCCGCTCTCGTGTACATTGAATGCAGAACC

CACCTCTTC CAAA GTCTTGGGACGACCATCAAGAAGAC CAAA CCGATGAAT CAAA CAAAACGCTCACGG  
TCCGTAAGCGT TTTCAA AACTTC TTTCAT TTTA TCT TTTAACATGGAATACCCTGTTGCCTCCGCTGGAG  
ATTCAACAGCAGTATCTTCCAA GAAA TCTC CAAA AGAGCTCTCCCACCATCTCCGACCTCTGCCTG CAA  
AGAAA TCGGGTGTGAGCTAT TTTA TAGA TTTC TCGAACACGATCTGGAG TAAA GCCCAATTCTCTCCG  
AGCTCTTCCGGAGTAGGCTC TTTC CCTG TTTC CATCATTAATTT TTTAGCTCCACGAAGCAC TTTA TTGA  
TGG TTTC TATCATGTGAACAGGAATGCGGATCGTTCGTGCTTGATCCGCAATAGCCCGTGTAAACAGCCTG  
ACGAATCCACCACGTGGCATAAGTT GAAA AACTTGTATCCTCTACGATACT CAAA CTTCTCAACAGCCTTC  
ATCAAGCCCATATTACCTTCTTGAATCAGATCCAA GAAA GACAGCCCTCTGTTGGTATATTT TTTC GCGA  
TG GAAA TTACCAACCGTAAGTTGGATTCGACCATCTCTTT TTTC GCTTCCTGGCTCTTGTCCATCCAACG  
CTGTAACATCCGCACATCTTT TTTAAA CTCTTCAAGAGTGCCTCAGCCGCTACCTCACGCTTGTGAAGC  
TTTC GCCGCGCCGAGCAAG TTTC GCTGCGG CAAA CTTA TTTC TCTCAGCTCGCGC TTTC CAAA TCATTGA  
TTTC GCTGTTCTAACTGCAAGAATGAATCATAAGCCT TAAAA ACCACCTCTCC GAAA CTTTCCGTCACATT  
ATGACGACAATG GAAA CACCG CAAA TACGCTTGTGTACGGATACGGCA TTTC TCCAGCTCGTCATTCAAC  
CTTGCTGATCTGGCTTGGACAACGCCGGATCT TTTAAA GCAAGAAGCCGCTCTTC CAAA ATATGCATCTT  
CTTC TTTC AATAAAA GAGATGAG TTTC GGCAGAAGATTAAGGAAGTGTGTCTTATCTTCTACTTCTTT TTTC  
AGAAA CGATCTTAT CAAA TCGTTC TTACCATTGATGAGATACTGCGCGATCGACACAGCTTCC TTTC GTA  
GAATAGCGGAAGCG CAAA ATAATTC TTTC TAT TTTC GAACTTGAGCTT TTTC TATTCTCTTGA GAAA TTTC CA  
CCTCTTCTCTCTAGTAAGTAGAGGAACGGTTCCCA TTTC TTTC CAAA TACATACGAACAGGATCATCTGG  
CGTTCCTTTCAGAACGCTTAGCTAACCTTCTAGCTCT TTTC GCTTCCTTT TTTC TTTC TTTC TGTCGCTCT  
ACATCTGCTTGGTTT CAGGACTTGAACATCCATTCCCGCCAGAAA AAT TAAAA CTTGATCGATCTGTTCTG  
GCGTATC GAAA GAAGGAGGAAGAA TTTC ATTGA TTTC TTTC CATACTGATGAACCTTGATCCTTAGCAAG  
AGTGACTAACTCTTCTAAC TTTC  
GTATCCATGCGCATGCTGACA AAT TAAAA CTAAG GAAAA ATCGGCCTA GAAA GTGACAG TTTA TCTTAAG  
AAAA ACA GAAA TCTAGGGATTTTAGA TAAAA AAAAA AGCCTGTTGATCAGATTTA GGCCTAGAAA ACCC  
CTCCGCTCT TTTC TACTTATCCCTAAA TATAG GAAA GATTTGTAAA AAAACTGGCT TTTC GAGGGTACA  
AACCCCTAGTATATGTTGAG CAAA AGGACCCTTATCTAACGTGACTACACAATAATAGAAGGGAGTCGCC  
C CAAA AGCT TTTC  
CCCATTGCGGAATCCCTCAAGAACAACATCGCTCTCTCTG TTTC AAAA AATCTTCTAATCCGATCCCGT  
CCAATCGT TAAACAAA GCATTGG CAAA AAGGACTC TTTC GCG CAAA GGGAGCATAAATAAATAGCATCCCT  
AGAT TTTC  
TTCTTGATACCG CAAA GCTGT CAAA GAATCCGCCGCTTCCGTTGTCTCTACAC GAAA AACAAT TTTC AG  
AAA CTCTAATAACAGCTGAGCCACTACATCTCGAGAAGCTACTGGC TTTC CTGG TAAA TTCGCTTAGCC  
CCCA TTTC CAATTGCAATAGATTACGTTAGTTCGCACATGAGGCTTGTACT TTTC CTTC CAAA TTACCAA  
TATAAGCCTGTCTCTTATCCAGCATGCTATGCTGCTCCA CAAA GGTGCTTGATATTCATCATGCAGCTC  
TTGCTGATAAGCAAGCG TTTC TTTC GAGCTCCTGAAGCAATCTTGAT TTTC TAAA AT TTTC TCATTACGT  
TCACGAACGGCAGCTTCCA ACTGCA TTTC TAATTGCTGGT TTTC CTC TTTC AATCTTCGGGACAACCTCT  
CCATATGGTCGTAACGCC TTTC GCTTGAATAAA GACTTCTCGAGCTTGTCCCAATTGCTCCACCAACTT  
ATCATTTGTGCAAT TTTAAA CGATCCG TTTC  
CCTTCGCTTGTCTGTAG TTTA CGAATCT TTTC GCTTCAAGGAGCTGCCAGCGGGCAGCAAC TGCC  
GCTCTCGCCTCCCAATCGCGAACAACCACC TAAA GAAGAAA CAACAGGGAAGA GAAA GGAACCAACCA  
CCATTGCTGCTCGGA CAAAAAAGGCCA ACTCCCTATAGGCAGGAGAATCGC CAAA ACGGGTGGGAGGTAA  
TGAAA GTATCGC GAAA TACAATAATGATTTT TTTC TTTC TTTC TTTC TTTC TTTC TTTC TTTC TTTC  
TATT CAAAA ACCCTTGTACATACTATTGGTCTTCCCATCACATACTGCATGCC TGAGTGCATCCCCA  
AACTATATCCCTA CAAA TCGCGAAT TTTC GGGATTGATCATTGTTTT TTTC GAAT TTTC GAATATCAACTGT  
TTTA GAATCTACTATGATGTTGGCAACTACT GAAA CTTCTTTAAA ATAGGTCTC TTTC CCCCCTTCT TT  
ATTTTATCTATCCTATT TTTC TTTC TAT TTTA TTGTCT TTTC ACC TAAA ATCTCCACGTGTTCCGTC  
GGTTACCTGTAAGGCTGAGCGGATGACATCGTTACTGCGGACACTTCTGTT TTTC TGTCGGTCTCTGGA  
GTGACACTTCCAGAGATGACG TAAA GTTTC GGATACAACATCTATCCTACTCTCATGTCATGCC GAAA GT  
CACAGCAGATCGCTGTGAGGTGTCGCG TTTC  
GGGAGAGATTATGGCACCAAGAAA ACCGAGCAA GAAA GTCGGACCT CAAAAACGCCCTTCTGCAGAGAAG  
AGAGTTATCACTTCTAA GAAAAAGCAATTACGTAAT CAAAGCTT CAAA CAAAAGTAAGAACTATATT GA  
AAAA TTTC GAATTGGCAGTGCAATCGGGTGTGTTGGAATCCATTTC GGCAGGGTTCGTTCCG TTTC CAG  
CATCGCAGATAAAA GCTGTAAA ACAGGCATCTTTAAGAAA GGTAAA GCTGATCGAGT TAAA TCCCGCGCT

TCTGAACGCGCTTGCCCCGAGCTTAATTTTTC TATTC TTTCTAATTAATCATCTTAGGTC CAAAAG  
CTGATGAACACGCTCAC TTTCTGAGGCTTTTGGATCG TTTCTTGTCATAAA GATTTTATTTGCATCGA  
TTTAAAAGCGATTTCTTTTACAATGTCTTCCCGATATGCCTCCTTTTGAGTCA TAAACCTTTGGTTTCA  
CAAGATTTTTACG CAAAAGACCCCTTAATTTTTTTT TTTGGAGG TTTCCACAATGGCAGCAACGGTACCCATA  
GCAAGCCCAGTGGGCAGACTACTATCTTCCGCAACCGCAACTAC TTTGCGAGGCAACGCAACATCCCTTC  
GCT CAAA GCTCAGCTCTGTTAATGA TTTGTTTGACCTCATATCCTCTTCCTGCACCTTAGCAAGAGTGAC  
ACCAAGGACCACTGTCTCTGAGACGCAACAACAGCAGCTGTCCACTATAGAGACCACATTGGGCTCAGCT  
AAAAGTGCAAGTAATGCTGTTCAAGCAGGGTGTGGAATTGTACAATTACTAACC GGTTATTCTTCA  
AAACGAATCCTGATGGATC TTTCCACCTAGATCTTG TTTCCGAA CAAA GAACCCCTCTGTCTCCACTATC  
ACTTCTCAG CAAA GTAACCTCG TTTAGCCAG CAAA GTTCTAGGAACCGT GAAA TTCATGGGCTCC CAAACT  
TTCCCTGT TTTA ACCAGTTGGGTGCACACGCAACTGGTATTGGCTTATCTGCTTCTGCG TTTGGAAGTGTCA  
GCTCCGCCTTCGATGTCGCA GAAA ACTCAAGAGAAGTTCTCGGGAACCT CAAA CAGAA TAAA CTTACAGA  
AGGAACATC TAAAGAAA ACGGCTTCATGGCACGTCT TAAAGAGCTCGTGCAAGTATGTTCAACTTGCTT  
TG CAGCATCTTGGACTTGCTGGCTCAGGC TTTCTG TTTTCATCAGCGATGCAGT TTTCTACAGCATTTATGG  
GAGTGCACACCGCT TTTATTGTGGGTATCTTCTGCTTCCCTATCTGC TTTGGGAAA GTTTATTC TTTCTAT  
CGCTT TTTAAGG TTTGCAAA CACCACATCCTTGAAGCTCGCAGGTACATATCTGCGAGCTTTTT TTTAAT  
TAGAA TAAATTTTC CGCTGCTAAA TGAGACAAA ATCCATTGAGA ACTTGCATAGAGGTAGAAA CTAACGT  
CCATTCTGTTGAATGTTCTGTCAT TTTGGTT TTTGCAAG TTTAATTGTTGCGTTTG GCTCTGTGTTAGATAA  
TCGTGCTGATCCG TTTGTACTAGCGTATGCATCGGCCCAATCCTCCT GAAA GACTGGCATTAT CAAATC  
CG TTTACTGCATACCCTTC TAAACTTGCCAATGTC GAAATCCAATCTGTAGGTCCAGTTATCTTATA TTT  
ATCCTTGTCGTAATTGTTATC TTTCTTCTCAACCTCATAATTAAGACTTCTTAACAGAGAGTC TAAACT  
GCTAAC TGTCCACGATAATACGAA TAAAGATAAA TACAGATTGGCTTGCCTGCGCATGCTGTTGCTT  
GTGCATCCGTTAC TTTA TGCCCTTGCGC TAAAGCTTCCACTCTAGCTAG TAAAGCTTCTC CAAAACCTC  
GGCGGATAACAGCTATTAATATCCCTAACGATATATTCGTGTTCCCTTAGC TAAAGCCCCATGAAC TCA  
AAGAAA TCCCACAGAA TAAATCT TTTCTTCTCTGCT TTTCTACAAGATAGGAAGAAA GATTGTAG TAAA  
CGGATGAGGTAGAGAAGTTATTAGTAATGGACAGGAGGTGTTAACAGCGTTAGCAGCGACATTGTTGAA  
GTTCACTTCTTGAAT CAAAGGATT CAG GAAA TTCTCCTGCTTAGGAA TTTGTGTA TTTAAAATGAGATGG  
ATAAAAAGCAGAACC TAAACTCGTAGAGTGCATCCAGCTATCTACAGCCTGTGCACG TAAAGAAGGTGTAC  
TCCCTGTAGAAGTAT TAAAGAAGC TTTGGCTGGATCTAATGTGTGCGTAAGTCTGATTAAGAGTATTGAT  
TTCTGATT GAAA CGTATTGAGGTATTCTGAAGC TTTCCCTT GAAA TTCTGTAAGTAGAC TTTGTGCTTCT  
CTAACAGCAACAGTAAGA TTTA TTTTCTGTAATTACGGTGTGTA CAAAATTAC TAAAATTAGCTCGGC  
AAA CATTGTTGGTACTTGTAAATATAGTTAGT TTTAAGTTCTGTTATCATCAGGCAGCG TAAAGATT CAAA  
AAACTTCTCTTT TTTAAGTTCTGTTCCA TTTATCT TTTGAC TTTCTGGAGTACAGTATCTTCGCTCACGATC  
GTACTAGCCATCGTACATT CAGCCACTTCGCAATAAGCTGCCATGTAAGATATAACGTGGGCTAATG TTT  
GTGCTGTATGGGCATTGTTAAGT TTTAAAAATTTA TCCACATATGCGTTATAAGACTAATCCCCGCACT  
ATC TAAA ACATCAGTTATCTGCGAGAGTGTATAAGCCCAGCATAA CACTCCATAACAGATGTCAAGCGT  
ACAGAAG TAAATTTCTGGTTGTCAATTGAGGCGCT TTTA CCCCTTCAGCATACTCTCTAACGATGCTTGTG  
CTTGTAAAGAGGATGTCTTT TTTA ACTTCTAACTC TTTAATTTG CTCTTCTACATTAGAACGTACAGATTG  
GAGATTCTGCGTGGCTTGTG TAAA GGC TTTA ACCACTCTCCCTTACAGATT CCTGCATCTTGCTGCTG  
AGATAGTAATCCATCACCTCTGGAGGAGGTAAGGCTGCTTGTGTG TAAATAGTATTGATATCAGTATCAC  
T TAAA TTAGAAGATTGCTTCG CAAA AGGAATCAT TTTCAACACAGAATCAATGACTTC TTTAGATCCACC  
TAAA GCGGTTCAACCTCCATAGCATTATT GAAA GCTTCCATCCAAGCTTGAAGCACTAAC TTTGCGTTA  
GCATCG TTTATGTTCTC TTTCTG CAAA GAATCTGGAACATCCAGACC TAAATT CAAA CACTGGTCCAGCA  
TCTCCTGGATAT TTTCTCCTATGCTTGCTCGATG TTTCCACAAA GCTTCCCTTTA CATGTGTGT CAAA GTA  
CTCATCAACATAACTTCTCATAATCAGC CAAA GACTTCTCTATGACCTGATCAGAAGCACCTTGAGCT  
GTTAGCTGAGCTGTAACACGATC TTTA CCTTCTTGAAGCTCTT TTTCTTGTTT TTTCTTGATAACAGTCT  
TGATAGATT CATCTGAAGGAGCATAAGCACTAG CAAA AACGCTGGCCTGCTCCGTATCATTAAGAGAATC  
CTTCTGCTGATACGACTCCAT TAAA AC TAAATTCGACGATACACCAGCTACTTGAGT CATAGGTACCTCT  
GGCAGTCTTCTATCAGAGCATT CAAA CTATCTGTAATGGTAGT TACTAATAC TTTA GCGGTAC TTTGCT  
TAATATCTGCAATAGTACTACCA GAAA TAGTACCTGCTGCCGGAGTGTGCTGCTCCTGCGGCTCTTCTTAC  
CCCCAGTCTCCTCCAG GAAA TACTCTGTTAGAGGGATTGACCACAGAACCAACTCC CAAA TATCCAGCT  
TC CAAA GCTACAGC TAAA CGTCTTAGTACA TAAA GTCCTGAG TTTA ACTCCTCCATATCAATGGCTGGCC  
GTGCTTGGTT TTTAAA ATCCGAGCAAGGATTGGCGAG TTTA ATCT TAAATAAA CCTCTCCAGATACAGT

AGTTGGCC TAAAA TTTAAATAGTAAGAAGACAT AAA AACAAAAC TAAAAACT TTTATGTTT TTTAT TTTCT  
TATTTAAAAAAGTTTT TTTCTATG TTTGTTTTTATAAAAATT TTTATGGTAATCTTT TTTATAAAAAGACAT  
TAGTTGAGATGTGTTCTATGAACATATTTAATAAAAATTA ACTCTG TTTCAAAAAGATTACACAAA AATAGA  
AGAATTA TTTCTTCTACGCATAAGAA TAAAAC TTTCTGCATGAATCAAGTAATGCAG TTTCAAAAACA  
GAAA TAGAGCGTAGTGCTATT CAGAATGT TTTATCTCT TTTAGA TTTAGATAATGATGT GAAA GGGAAA  
ACGAACAGTTAGTTGCTTCCCTATCTTCTAGCGCTCCAACGACCAGTCTCAGCC TTTAGATGAATCAGC  
TGTAATCACATACGATCCACCCTCTTCTAATCCTCTGTATAACGCTTC GAAA CAAGCCTGGGTACACAAT  
GTATTGGTTGGC TTTCTCTCTGTCTG TAAACGAAGC TAAAACAAA AGCTACG GAAA TCGCTGGGCAA CAAA  
ATCCTCCA CAAA CAGACCTTAAGCCTCTGACAGA TTTGTTTGATTTCGTTAACTACTCTAGTAGATAAGGC  
TAATCACAGAGA ACTATCTAACGAAGACTTAGAGACAT TTTATCTCTTCCCTGACCAGATCT TTTCTGCT  
ATT CAAA TTTCCGTTTCAAG GAAA TCAAAAAGTACTCTTTTCTAATCAATTATTTGGATTCT TTTG GCG  
AAGATGCTTCTATAGAACAAGTT TTTG CAGACATACGAATTGAAGGACTTCAGGATACTCTGAATATGGT  
CCAATCACGACTGTCTGCCACAGAATTCGAATCC TTTAAA GAATTACAGATGATCATAGATACTCTCCGT  
GAGTATGTTGAACCT TTTAATGACGAAGGATTTG ATACCAT TTTA CAGACGAG TAAA GATCTGTCTTCCG  
CTATCATCAATTCTTCTCTCTCCAGCAACGATAAGATAGA ACTCTGCCGTAATATTTGCCGACC TTTA CAG  
AGACCAAGTGTTATCTAT CAAAAACTTAGATAACGTATTGAATGAGACCATTTA TA TAAACGCTCGCAAC  
AGCTCTCTGTTCT CAAACATTTG CAGTCTCGTTGAATTCATCATGGGGAGTTTC GCTCCTATCGGAC TAA  
ATGAGACTACTATAGAGGTAACGAACGCATCAATTGCTGGAGCCCTGCAAGCAGTGC GCGCCATTGACAC  
TCG TTTCCATGAACTA ACTCCTGAACAGAAA AATCTCGTCAAT GAAA CGGTCAA GAAA CTTGATGACTTC  
TCAGGAGGTA ACTACATCGGTGCCG TTTGGGCTTAC TTTACGCTGCAACAGTCATCTCCTCT TAAAGACT  
CTGTGACAACAGATGAAGT CAAA CAAGCGTTAACTCGCAAGCTAATACTATCGTCTCGGATT TTTCTTT  
AGCC CAAACGT TAAA ATCTACGATTAA TAAA ATTTGTACAAGAAA ACGGGGAAT TTTAAGCTAAGTTGAT  
GGTATAGAGAGACAATATACTAT TTTCCGCCCCGCT TAAAAACGATAACAAGTTCTAAC CAAAGCCACTCTTA  
ACCCAATCCTTCTTAACT TTTGGATCTATAGGATTTCTGCCAACATTAC TTTGGCAGCAA TAACCATGC  
AGAAA CTTCTGCTAGAGCCTTT TTTAAATTTAGAGCTCTAGCGCAAGTAGAAA GTA CAAA ACTAGATGGA  
ACT TTTACAAGGAAGTGAGA ACTTCTTACAGAAA TAAATCAATTAC GAAAAGACCTGT TTTCTACCAAC  
TCCTTGCACAATCCTAT GAAATTCGCTCTCTTCCCCTTCTTCTG CAGTTGCTTCGGTCTTATAGATCG  
CTACATGCCTCAAGAGATTGATTACTTAAACACAGAT GAAATCGGATCTGTATTACAGTAACTTCGGCTCT  
AGTGTG GAAA TGCTATGATTGAAGCTATTGCTCAATTCGTGAATGGAGCTACCTACTTCAAT TTTGCGA  
GCT TTTGTTGGACAACAACCTATGACAGCTATGGCTCAGGATACCTTCTCTGGCTC TAAAGAGACAGCTGA  
AG CAAA ACTCGCTTTAGAAAAACAACAGCTAAA CTCTACCTGCAATATGCTACTCAAGCTCT TAAAGGTA  
GTCCAAGAACAGATGGAACGAGTC CAAAACGATAAGGTTATCACTAACGAACAGAGATTACGCATCACAG  
ATGC TTTAAAAGGATACGCAGACAACCTCAACGCCATTAGCGGTTCT TTTAGTCTATTACAGGTGTACCT  
GAATCCTCTCAGCGTGGGAGTTCTGTAATGGCAACCAGAGGCAACGATAACAGGAA CAAACCC TAAAGGA  
ACT TTTCCACGTGTT CAGAG GAAA AGATCAGTGGCAAGCAGCTTTAGAAA TTTCTAGAAGATGCTCTTGTCT  
CAGGACTTCCCTTAATATCATCAGCGGAGGACTGTCCCCTTACAAGCAAGTGTGCAATCTGACCAACA  
AGCCTATGCGGATATGGGGCAGAACTACCAACTG GAAATG CAAA TGCATATGACGGCCATGCAGCAAGAA  
TGGACGGTAGTAGCCACATCTTTACAAA TTTCTTAACTCAATCTATCTTGGTTTA ACAAGAAA ACTGGCTA  
GTTAGA CAAATAAA GCAGCT TAAA AATTTTGT TTTAAGCTGCT TTTCCCTCACGATTATTACTGAAGCT  
ATCTTAAAGAGATTACGCGTAATCC CAAATAAATTTGATTTAATAGCTGAAGAGATGTTGCTACCACCAT  
CCACTCCTGTTGCATAGAAGTGAGATGCATTTG CAACTCTAACT GAAA ATTCTGTCCCATATCAGCATAG  
GCCTGCTGATTGAGTGTACCAGAGCTTGCATTTG GAACATTCCAATATTAGTTGGGCTACCGACTTCTC  
CGGATACCACAGTATCCTCT TAAA GTCTG TAAA ACTAATCTCCAGTTCT TTTCCGT TTTCTCCTGG TTTACC  
ATT TTTAACCT CAAA AACACCATCCACACCTTCAACAGTACTCACTGA TAAA GGGGCAATTGAGTTTTC  
AATGATGT TAAA GAATTGTTGATTGCGTTAAGCATATCGGTATACTGTGTCAACTCTGCATTAATTTTTC  
CTTTCTGCTCTGTAGATAACTTGTCAATCATCAGTAACCGCAC TTTGTTGATTAGTGACGGTAGCTTTAGC  
TGCTTTCTGTAATTTCTA GAAA CACATCTACTTGT TTTCTTTCTTCGTCTAACTGGC TTTAGCATTATCT  
GCAGACCCTG CAAA AATATTCTCCCCTGT TTTA CTTACAACAGGAGGTTGCCCAATATAGTTAG CAAAAC  
CAAA GTAGGTTGCGGAG TTTACATA CAACTAATCGCATC TAAA ATGGTGTTGCC TATATCCGAACCTTT  
ATTTCCGTAATACAGACGAGACGAGATCTTTTCTAAA AACTCCACTTCC TTTGGCATGTAGTGGTCAATC  
AATACAGAAGCAACGGCAGAAAGGGAGCGGAGAAGCCTCTACTTCTTAG TTTGTGCAATAGTTTTC CAG  
CATTCAACTCTGTCTGCATCTTGGTCAAGAATAGACTCTTCTGTCCCCTTGAACCATACG TTTGTGAAT  
CATATTCTTCTCTGAATCAGCTTGCAGAATGAATCGATCGCACTCTTGCT TAAA TACCTCTGCTTGAA

AGCGCTACTGCTAACATCGTTCCTAGCACTTTATGAAATCCATCGCCTAGAGCGATCTCATCACATACCG  
CTTCTCCTGAATCATTATAGGAAAATAACTCGTATCGATCCCCGTTTGCTAATGTGACAAAGCCTTGTA  
AGAACAAACCTGCAAAATGTCTTGCATTTTGCCGTCAAAACAAAGTTATTACTCAAACCACTTAACGTT  
TCTGAAAAGCTTTC TTC TAAACCTTCTAAGAGACCTGTTTCTTTA TTCTGGCAATTAACAACAACCAAAT  
GCGCACAGAGAACTCC TAAAAATTCGTCTAACTGCTGTTGTTGCAACGATGATACCGCAGCATTCACCAT  
TTGCTGCTGCTCAGCTGT TAAAAAGTCAAACGT TAAACCTATTGCACGCACAGTGGGAAGAACACTTACC  
ATCATGGCAGGGTTCAG TAAAAATACGCTCCTCTTCACTAGTAGGAGACAATGAGTGCATAAGAGAGGATA  
C TAAAGAAATCACCTGCACGAAGTAACCATGTTGCCTAGAATTC AATAAGAGCATCTTGTTGAGACT  
ATGATACGCTTGTACCGCATCCACTTGTCTTGGTACATAGCTGCTATTGCTTGACAGAGATCCACCTTC  
TGACTTGCCTTCAGCTCAGACTCCACGATCTTAGCA GAAAGATACCCACCGACTCGAGCAATCGCCTCTA  
TATGTTCTGGACTGAGATGAGATTCACCTCGTGCCTGTATAGAG GAAATTTCTTCCGAGACTTCTTGAA  
TACCCGAAACTCTTCTTCTGTCAAACGCTCTTTAATCACAGATAAAATCGCTTGGAAAGTCTCCAATCGT  
ACCTGGGCGAAGGACTGCTCTAAAATCTCTTCCGTACCAAATAATCTATCAAAGATTGGATCAATTCTA  
GCTGCCGCGTGTAGATACAGAAGCTTTCTGCAAAACTCGCATAACATCATTCGAAAGAGAAAGAGAGA  
ACGAATATCTTCCGCAGACAAAACGCTCTTGCTTGTCTGTAGGGAAGCGGCATCCATACGGATAGCAAGT  
AAATCTCCCCGTTCTTCTTCCGTAAAACAGGATGTGTCCACTAAGAGTTGATC AAAATTTTACGAATAC  
CCTGCACATAATCGTACTGCCAAC TTTGTTTAAATGCCTGTAAAAATAGGCATGCTAGAATCAGACTGAAC  
TACAGCTTGTGCAACAACCTGATTTTCAGATTGCAGGGAAGCCATCGGTTTTTCTTGGATGTGTGGGCTC  
TCTATAGAGCGTCTGTTTGCTATCTACATCCAACCTGTTCCAGTCGTTGAATCAAATTTTGATATCGCT  
GGTCTGCTT TTTGATCGAAGGAAAACAGAAGAGCTTTTAAAGCTTCTTGTTCATTTTGAAGTCTCATA  
TTGAGCAACCTGAGATACTATTGTTGCAGAGTCTGGTTTGCAATCTTC TTTGCAATAGCCTCAAGAGTG  
CTATTATAATCCGT TAAAGATCCTTGTGTACGATGAATACGGTTCATTGCCAACTCTCTCAACTCTACAG  
TTGTACTTGTGCGGAACCTATCCCAATAATATTTTTTTTACAAC TTTCTCCAGAAGAA TAAAAAGCAT  
ATTTTCTTCTTTTTGAACTAAGAACTTATTATTGAAAAGACTTCTGTAGACACGAGATTCC TTTGAAAAG  
AAAAAAGAGCCAAAAAAGAAATTC TTTTGGCTCCCCCTCAATTCACAAACTTCAATCACACGTTAAGA  
AAGATAACCAGAGAATAGAGAAGCAATGTTTACCAACACCTGTTGAATGAAAGCGGGCTGT TTTCTAAAC  
GCATCTCTTGAGATTCTGCGAGACTACGTTCCCATCAACAAACTCTCTTTTCAATTGTGCAGCAAAC  
TCTGCAAGCTATCCACAGAATTCTGAACAGCAGGATACC CAAATTTGTTGAGCTTTGCTAATAGATGCCGT  
GAGCTTCTGCATAATCTCTTCTTGA TTTGCTTGCAGATTGCTCACAATCGTAGACAT CAAAGAATCCAGA  
ACCTGTAAGCGGCTATATACATCACCTAACGTTTGCTATCTCTGACAATAGTTTCTGCTGCTCTTTGGC  
TAGCATCTGCACTGCGTCTTGGACTTTCTATGCCAGAACGAGAAAACGCTTCTGAAAACGCGGGGATTTGC  
AGTTTGACTAATAGCTGACTGCACGCGCTTCTGCTTTTCCGAAATA TAAAGAGTTCAGTGT TTTGTAAGCA  
GAATATCCATCGGAAAGTGTCTGCTGCATAAGAGCTGGAAGAAGTCAAGAAAACGCTGTCTTG TAAAGCT  
GT TTTACATTATCTGGACAGTCCAGCTGTTTCTGCGGAGCTTCTCCAACTTGGCAGCTGC CAAAAGC  
CACTGTCCCATAGCTGTAGCT TAAACCATCTGCTGATGGTTG TTTCAAAGCTTGCAGCAAGAGCATCTTTG  
ATTGCTTGTATTTTGGCTGGGAGCTCGCCATCCGCACCAACAGTTGATCTGACATCGCAGTCAGCTGAG  
CCTCCATAGCTTGTAGCTCT TTTAGCTGTTGCAGGATTG TTTACAT TAAATTTGTTGCATCATAGATC GAAA  
ACCTTGCAATGCAATCGCTGCCA TTTCAATTGTCTACATCATCAAGCAACAAG GAAATTCCTTCTGAATTG  
TTAGAGGATTTTCAACGCTCCTGCCCACTTCTGCGGAAGCAGCTGACCCACTCGGACCAACGATAGGAA  
TATC CAAACCACTAGGTGTGATCG TTTGAATATCTTGTGTGCTTGATTAATCTGCTCCTCAGCTTT TTT  
CAC TAAAGGCGAGTCCGCTATTTCTTGATGTTCTTGC TTTAACTCG TTTACCTTCGT TTTAGCAGCATCA  
ATTAATTTTCTTCGTGGCTGCGATATTATCTGGGCTATTACTTTTCCGTGCTTGAAGAAGTGCAGCCTGGC  
TTTGATCCCCAGCATCCACAATAGACTG CAAAGCTTGTCTAACTTAATTCCCCTTCAGAAAATTC TTT  
GATAACCTTTTCCACATCTGTAAGAAGAGCTTTTA TAATTAGAGA TTTGTTCTTTTAAGCTCTTTAATAATT  
TGGTGTGCAGAATCTTGTGATCTCTAACCGACTATTAATCGCAGGAATCTGATCCGCAGAGTCCGGTTG  
TTTTCAACGCTTCTGT TAAAGATTTAATTCTGATTTTG CAGCGTAACGAG TTTAATTCAGCTTATCAATAGT  
ATCTTTTTGTGCTTCGAGCGCTTTCTTAATATTA TTTAATTCTTCGGTATGATCGTTACTAGGATCTGAA  
TTAGCCTCCATATCTTGGAGAGCTGCCAT CAAATCAGCCAT TTTCTGTTTCTGATTCAGCAAGTGTCTTAG  
CGTCTCTAATCCACT TTTCCCGGTAT CAAAATTCGATTTAGCCTTATCATAATCT TTTGCCGCTACACG  
TGTAACCGTAGAGGTAGAAGTAGAGGCCTCTAATTGAGAGAGAGAGTCTGTTGGACTGGAATT TTTAATTC  
AAGATGGCATCACGAAGAGAGATTAATGCATTC TTTGCTGAGGA TAAAAAACTCCAGCTGCTTACAGAGG  
ACGATGCTGAAGAAGTCCGCTTCGGACGCCTTCGTGGACTCTTTTGGTTTCCGAATTAGAAGCGATTTGCCC  
ATTAATAATTGGATTCATCGAGCTCTGATTAGAA GAAACTGATTCGTGCTCCTGATTCATACAATA TAAA

AAAA TAAAAAACCTTACT TAAA TTA TAAAAGGCAA TAAAAAAGCCACACCCGTTAT TTTG GGTGTGG  
GCTCT TAAAAGACTATCCCTTAAGGGATTAGAATGAA GAAAT TAAA CCTAGGTCATACTTACGATAGGTG  
AAGTCGCTACCAAGGTTATCGTTAGCAGGCTTAGAATAAGCAGCATAGGCTCG GAAAGAAACTGAATCTG  
TCAGACCCATAACGAACTGATAG GAAACTCC TTTA TAGTTAG TAAA GCCGTTAGATTCT TTTA GGATCCAA  
TCCTTG TTTGATAGCTTGAG CAAA CCAATAT TTTCA TTTGGTTTC CGCGACCAATACCCGCAACATCAAT T  
TC TGGAATCGC TAAA GCTTCAACATACTCATAACGAACTGTTGCAGACCAGTCTCCAGCTCGTCGAACAC  
CGCCTAGAGAGCAGCCGATGAACCAAGCATGGT TTTCC TTACCATTTCGTAATT TTTG TTGCAGGAGTTGT  
TGTTGATTG TTTTC CAGTTCTCTGGTA TTTCCGCTAATGGAT TAAA GAGATAGGCTCCGTAAGTG TAAA GA  
TTT TTTGTTTG TCCAT TAAA ACCATGGCATAGCTGTGCTCTTCCCAACCAACCATTGCCATAC TAAA TAAT  
CGTACTTGGTATTAGG TTTAGCTGGTTGTGCAGTGCTTGCCTGCTGGATCATTCTGTT TTTG CTGTTAA  
CGTATTCCAGTCAATAACACTCGT TTTCAACAAC GAAAT TTTCTGGAAG TTTATTTAAA ATAGCTTCCACG  
ACCCAAGCATACTC TTTCTCTGCCATATTCACG CAAA AGGACCACCATGAACAATCATAGT GAAA GGAA  
G TTTCTACTAATACGTGCGCAGCGTA TAAA TGAATTCGGTC GAAA TTACTAT TAAA CTGAACGTCCGA  
AT CAAA AATATCTCCCAATCCAGAGCGACCAATCTCTG CAAA TACTTCTGCCTGCG TTTCTGGGTT TTTG  
TAGAATCGGTATCCTAAGAAGGCACGATTAATATCTAACCTGCTGCAGAAGATTCTCCGCCAGCAATCG  
TTACCCAATTCAT TTTTC GAAGTCATCCAATCTATTAGCAGCGGTGTAATCCACATA CAAA TTGAATTCAT  
ACGATAACGATTGATAGG TAAA ATAGG TTTAGTAGGAGTCTGAGTTGTCTCAAGATCCTCT TTTG CATAA  
ATCCATCGAGCGCGGACATCTCCAGC TAAACG TAAAGCTCCATCGCGCTTACGAG TTTCTACAAA ACCCT  
TGGAACT CAAA TAAGAATC TAAA TCTTCAACAGACCATAGCTGGCTATCCATCGAACTAGCCTGCG CAAA  
AGCCAAG TTTGTAGACCACAAAGCTAA TAAA AGCGCGCCTACAAA CCG TTTATAAAA AGTATTT TTTTCATA  
ATGTCCCTTAG CAAA G TTTGACATCTCATACAACCGACCCATGG TTTG TATTTTA TTATCGAGAAGTGCTC  
ACG GAAA TCTCTCTTCCCTGGGACGCTTGATTTTT TTTTCG CAAA CGGTTACAAA TCTCTTACTTACATAAGC  
ATGATCGTAACCAAGC CAAAAACTATAGCTCAGGAAGGATTTTT TTTAAAAATACAGTTCTATCTTGGGA  
AGAAA AAGATGTCTAAGAGACTAGCTTACAGCTAG TTTCTTAGGATAGACTGATGCC TTTTC CAGTATT  
GGAAA GAAGTAAGATTCAAGATCTTCTGTC TTTAGTAATTTAGCTAATC CAAA CAATACCGATAAGAA  
AAGTGCCGATTCTG CAAAAAAGACTCCACACTGATC TAAAAAAGACAC TAAAAGGT TTTGTTGGGACTGTT  
AATGGCTCGA TAAA CACTACGTACGTGGTATGCGTTACTATGTTTACACCAATCGTAATAACCGCTGCTA  
GAATGTTGTAATGACAGT TTTCCACTCTCT TTTAAA TGTTCTCCACATCAATCC TTTGTAAGTAGGAAG  
ACTCTTACCAGCACAATACCATAGCATCGCTAACTGACCCACGACGC TAAA GAAGTGGCGTAGGC TAAA  
ACAGCAACCTG TTTGCAAAC TAAA CATCCGATCACATTAAGAACCATATTTACTACGGCAGCAATGATCC  
CTACTAGCATCGGAAC TTTGTAATTCCTTCTTGCATAGAATAGAGCCGATACGAGAGGAGC TAAA GCCAT  
AGGGATAATACTTCCACTATAACCTTAGAACTCTTACAATAGCGTGCACAGCTGTTGTAG GAAA CACT  
CCGTGCTCATATAACACTCGTACCCAGG CAAA CAAA AAGCAATAGCCCCATCGTTATAACCACCATAA  
CAGCAACAGTGAGCTTCAAC GAAA ACCGCAGGAGATCATATCCTTGTGATGTTCTTGTGATCTTGAACACA  
ACGA GAAA TCGCAGGTAGCAACACTGTGAAGACTCCAAGAC CAAATAAA TGGACAGGTAACCTGCTGTATT  
CGCACGGAATACATCAGATACAGAGGTCCTACCTCATTGATATATCGCGGAGCCACATATCACATAGTA  
AGTTCAACT GAAA GATTCCCATGGATAACAATCCTAGAGACAGTGGGGCAATAAGAGCACGGATACTATC  
CCGCTCCTGAGGAACCTC TTTACT TTTG TCC CAAA AACTTCATGACTCCAGGAAGCGTAATAGCCCATTC T  
AAA ATGAAGCCTACGACAAGGACTACAGCTAATC CAAA AATACGA TTTCTCGGATCATAATTCGGTGC TA  
AAAAGACCCTTCCAATCCACAACACATTAACAACAGAAGGAGCAAGTCTACGCT GAAA AACTT TTTCTC  
ACAATGCAACAGCGTGAATTCACTGTATACATCATCA GAAA GATCCCAGGAGGTAGCAATATGATTGTT  
AAAATAGGGTAT CAAA TAGGCTTCCGTAAACGCAAGAACAC CAAA CACAGAGTCCTAATTCATAATTA  
AAGTAAA TAATATAGCGCTGTAA CAAA AGAATCTC GAAAAGCT TTTAAAGAAA AACGTTGCTCGAGAAAT  
AT TTTG CGCACG TAAA AACTC GAAA TGCGGAATAAA AGCGAGTCCAAGAATAGGCCACC TAAA AGCTTT  
CT TAAA AAAAAGATCGTCC GAAA AGCCAGC CAAA AAGATGCTACTAAGGGATCGGCTCC GAAA TATGTAG  
CCATAACAAT TTTCTCGTAACATCCAGTAAGACGAC TAAAAAACGTTCCGGACAG CAAAT TAAA CAATGA  
GCGCACTAGCGATCCTTCATCATC TTTCTCATCACTCTCCTCTT TTTATGTCT TTTAAGCCTT TTTAGG  
CCC TTTATACCGAATAACGGCTAGTGATATT TTTCTGATAATGCAATAACTACCATTCTCGCTATTT  
ATAG TTTCTTTAATCAAGAACCTCTGGCAATCTTCTATCATGAATGACTAGATAGAGAACGGGCTATGTT  
TATACTTCTCCTCCTCAAGAGCC TTTACTAGGAGCCCACACGCTCTGCTGCTGGAGGACTTCATAATGCT  
CTTTACGAAGGGCGCGATATCGGAGCAACCACCGTTCAGCTATTCAGTGC CAAA TCAACGTCAGTGGAAAGC  
GACGCGCACTAACTCAA GAAATGGTGGATCAGTTCCGCATAGCAC TAAAT GAAA CTTCTCTATCTTACAT  
CATGAGTCATGCTGGTTA TTTAAA TAACCCTGGAGCTCCTAATCCGGAGATTCTA GAAA AAAACTCGAGTG

TGTATGCACCAAGAAATAGCGGACTGCATCTCTCTCGGCATTTCTTTTGTCAACTTTTCATCCGGGAGCGG  
CTCTTTCTGATTC TAAAGAAA GTTGCCTCGATCGTGCTATCACGAGTT TTTCA CAAA TGGCCCCCTTT  
TGAAA ACCATCCTCCACTTGTGTCTTCTT GAAA CAACCGCAGGCCAGGGTCCCTAATAGGAAGTTCT  
TTTGAGGAAC TTGCTTACCTAATTCAAGGGAT TAAA GCCCTCATACCCATAGGTG TTTGTCTAGATACCT  
GCCATATT TTTG CCGCTGGTTACGATA TTTTCATCGGTGCGGGATGGGAGCAAGTACT CAAA CAT TTTGA  
CGCAGTGATTGGATTATCTTT TTTA CGAGCCATTCACT TAAA CGATTCTGTCT TTTG CTCTCG GAAA AAAC  
AAA GATCGTCATGCCCTATTGGAGAAGGTTGCATAGGCTCAGACAGTT TTTG CTTCCTTATGCAAGATG  
AGCGTACCCGCATGCTACC TAAA TACCTAGAGACTCCTGGAGGACCAGATCTGTGGAC TAAAGAAA TCCG  
TTACCTA CAAA AAG TTTG CTAAA GTCAACAGAAGGAGTT TTTCTCCTCTCTCT TTTAT GAAAAAAAAGCCT  
CG CAAA AGCGAGGCTT CAAAGAACATA TAAA TCCTTGAAC CAAA TGATTATGTTCTGTGGGATA GAAA CT  
CACAAA TAACAGAAA CG TTTA CTGG TAAAGGAAGTTGAGAAGCGA TTTGATCCAGTTCTGGAGCAACAAC  
CAACTCTCT TTTAAA AGCTGCT TTTA TC CAAA GATAGATAGGCAGGAAGAGAGC TTTGATCTTTG TTCTCT  
AAA GATTCTGTAACGATAGCTAATCTTT TTTGATT TTTCTTTCAAAA GAGATCTGCATTCCAGGACGAACGA  
AGAACGAGCGTCTATCCACCTT TTTCCGTTACCAATACGTGCCCATGAGAAA CTAAGTGTGAGCAGC  
AAAGATCGTTTTTTG CGAATCCTAGTCTATAGACGATGCTGTCT CAAA CGGCACT CAAATTTCTCTAGGAAC  
ATTTGCGCAACGTTTCCTTGCTTA TTTACGACCTC TTTATAAGCCTTAAGTAAATGCTTCTCTAAGATCA  
TTCCGTAGCAAGCT TTTAATT TTTGCTTTTCTTCTAAGTAAAGCCGTAGTCAGA TTTCTTT TTTCTTTG  
CATGCCGTGCTGACCCGGAGGATTGGGC TTTCTCAG CAAAGGG TTTGACCTCTCC CAAAGATGTTAGCT  
CCAAAACGTCTCGCTATTCTGTT TTTAGGGCCACAATATCTCGCCATGTTTCTAGTCTTATTTTA TTCCTT  
AAAAAACATCGCTCGCTAATTT TTTATTGGGAGACGTTGTTGAACGCGAGTTCCCGCGCTTGACAAAAT  
ACAAAAGAGCATTCTAGTTCTATTTT CCAATTTTC TACAACGGATTTTCCTAGATTCTCAGTGT TAAAAAA  
CTCTTCTTATTTTAAAAATCT CAAAAAAGGTCGAT TTTA ACTAGCTGT TTTGTTTAGAAA GATACT GAAAA  
GGTTTC TTTTATTTCTTCATCAAACTC TTTGATCTATTCTTACCATCTCGTATACTGCCTCTCAGCCA  
TTTTAAAAAGTT TTTAACA AAACT TTTGAGCTTCTCGATT TTTAATCTTAAAGATAAGT TTTTCAGCATATA  
GGATGTCTTCATG GAAA AGAATTATTATGCT TTTAGCGTATTACTACT TTTGGTCCCGTAAGCAACCCTTAT  
GAAGAAA TTGCTTTA CACAAGCAATTATT CAAA ACTATGGATG TTTCTTGCCGGA TTTACATCTCTGAAG  
AAGGGATTAACGGTCAG TTTAGCGGCTATCAGCCAGACGCAGAACGCTATATGGCTTGGCT GAAA CAACG  
CCCAGAT TTTG CCTCGAT TAAA TT CAAA ATCCACCATATTGAAGAGAATATCTTCCCTAGAGTTACAGTG  
AAGTATCG TAAA GAACCTGTTGCT TTTAGGATGCTCTGTGATACAA CAAAACAAG GAAAACACATTTCC  
CTGAAGAGTGGCAT GAAA AACTCCAAGAGAATCGTTGCTTAGTCTTAGATGTTGAAA TAACTACGAGTG  
GAAA ATCGGTTCAT TTTGAAAATGCTGTTCTCCCTGATATT GAAA CGTTCCGAGAA TTTCTGATTACGCT  
GATCGTCTAGC CAAA GAGCATGATCCTG CAAA AACTCCTGTCTATGATGATTGCACCTGGAGGATTTCTGTT  
GTGAACCTACTCCGCTCTTCT TTTA GAGAAAAGGCT TTTAAGAAGTGTACCAACTGGATGGAGGCGTGAT  
CGCCTATGGAT TAAA AATGGGAACAG GAAAATGGAGAGG TAAA CTC TTTGT TTTTC GATGACCCGATGGCT  
ATGCCATCGATGAAGCGGATCCTAACGTGTCTCCTATTGCTCGTTGCTCTCT TTTG CAACACAGATTCTAG  
ATACCTACTACAATTGTG CAAA CACAGACTGTAACAACCTC TTTATTTG CTGTGAGTCTTGTATCGCTAC  
CCATAAA GGATGTTGTT CAGAAGAATGCTCTCAAGCTCCTCGTATTCGAGC TTTCTCTGCAGAGAGAGGA  
AACAAA CC TTTCCGTAGAAAACACC TTTGTCCAACAATTGAACAGAGCTGTTGCC TAAAAGAACAAGAAA  
ACCAACCAGCATAAA AAAAAGAGACGCCACGTTCTGTGGGCTCCTCTTC CAAA GTCTTCTGCAGCCAGG  
TTAGCA TAAA AAGTA TTTATTTTC CATCCA CAAA ACACATTTTTG CACAACATCTCTAGCGGCTCCGAACA  
CTCTAATCCCCTCTCCTGCAATAGGTGGAGATT TTTA ATACAGGATT CAAA AGAATGGTCTAGCAACTCT  
TTTGCTGCCACCTCTCCGAATAATAACGCATAGTTCATATG TTTCTCTTCTGATCATCTTGACTAAGAT  
CGGCAAGATCATCGCGTA TTTGGAAA AGTAACC CAAA ATGTTCCGG CAAATTCAGCTACT TAAA GTGGAGCT  
TTCCCGTTCTCCTCCTC CAAA CAACCATCCTGATACGCAAGCAA TTTCAAAAAGAGCTCCTGT TTTCTTT  
TTAATAATCCCTAATACGTTCTCT TTTG GAGAAA TCAT GAAAAAATACATCTTCATATTGTCTCCTC TAAA  
TTCTCCTACGC CAAA ACGCAACTCAATCAGCTC CAAA ATATCTTCGTAAGCCTCTTCCACATCTTGTT  
ACAA GAAA CTACAGCT TTTAGCGCT TTTGCATTCTTACGAATTCGTGCATAAGCAGCTGGAATAAGAGCA  
TACGAAGCCAGGAGAGCCGAAGCTTCAT CAAA AGC TTTGTGAACCGAAGGCTTGCCTCTACGCATATCAT  
CATCGTCCATACCGCAAGTCATCGGCTATTAACGTAGATGTATGGATATACTCAATAGCAATGGCGGT  
ATCCAAGACATCTCGCTC TTTA TGGATACCTCCG CAAATAAA CCAACAAGCAAGGGACGAACCGG TTT  
CCCCCTCC TAAA AGGGCATACTCTATTGGGTCTCTTAATCCACCCTGAGTGTTACC GAAATCTCC CAAAG  
AATCGCGAAGCTTTT TTTCTACT TTTGATCGA TAAA CGCT GAAA TAATCCATATCCAAGCAACTGCCTTC  
TT TTTCTCATCAACC TTTGTTTG CAAA AGGTTG TTTCTTAG TAAA TGG TTTGATTAGGAAGAATCT TTTGT

AGCACTGGCTACATAACATCCTGGATTAAGTACGGTATTACACCCAACACTTACTCCTCTACCTAGGAAA  
GCTCCTAACTTTTTC CGT TTTG TATCATAACGCTCTCCAGAATGATGGAA GAAA ATGGT TTTG CCATCTA  
ATC TAAA G TTTG CACAACGAACCTCTGCCCTAGATTCACTCTGGAAC CAAA AACAGAATCTCTACATA  
AG CAAA GTGAGCAGC TTTG CCGTGATGCC TAAA TAGCTGTT TTTA ATCTCAGAACAGTGTCTATAACG  
CAATGTGAGCTAGTTATTACACCGCTCGAATATATGCACCATGACGCACCTGCGTATAGGGACCGATAA  
TACAAGGACCA CAAA TATAAGCCCCAGATTCTACGTAAGCTCCTTCTTGGA TTTG GATAGTCTC TTTA TT  
T TTTA GATACACCCCTTCTTCAAGATGCCCATGGATTCTT GAAA AAGTATGAGAAGCTAG TTTG CTCTCT  
AACAAA GT CAAA ATAGAC CAAACAAA TTCAGCTTGGCTTACGATCTCTGGA TAAA GAAA CTCTTCTGGTG  
AAAA TAAGGAGGCTGAT AAA ACCATAACTAAGCTCCTGATACAAGCATAGCTAGGTAT TTTAAA CACCCCC  
TGGGGT TTTA GAAA GC TTTG TATCTTGGTGGAGAGAATTT TTTA TCTCCATCATCT GAAA ATAGATACCC  
AACACCTCGTAAGGTGACAATTCTACTTCCATAAGCTCCTAACTT TTTCT TAAA GAAGCTATGTGTACG  
TCTACATTCTTGGCTACAATCG TTTG GCATGATTCTTAAT TTTCTTCAAGAAGATGT TTTG TAAACAAA  
GTTGTCC TTTG TTAATAAGAAGTCG TTTCAAAA ATACCAGACTCCGATGGTGT TAAA TGAACACTCCCTTC  
TGGAG TTTCTACTGTGAGCTTCAATACATAAAA ATACATTAGGCC CAAA ACGAATAC TTTCCGGAACAGAA  
TGTAGCGAATGCTGA GAAAGAAA CAAGCTGATTGCGGAT TTTAAA ATTCTAGGAGTAATAGGCCGAATTA  
AATAC CAAA ACCACGATC CAAA AGATCAACACTAG TTTCTTCAT CAAAAAATC TAAA AGAAC TAAAC  
AAA ACTACCTTC TAAA GAT TTTG GAGAACGAATCTCTCTTGGAAAGCAATGAATATTCGCAGACAACCAAG  
TCTGCGGACAGTTCTTG TTTA TATTGCTGCCAATAGTGCACCGATACTCTT CAGGATTAAGCAAT TCTT  
TTGTTTGAAAAA TAAA TCCCAATGTTCACTTACTAGTAACACATG TTTAGGCCCCGCCATA TAAATAAA  
CCCATTTGAACTATTAGATTACCTAATAACA CAAA AATAGTTT TTTCAAAGAGCCTCA GAAAAA AAAACG  
ATATCTTCAGACTTTT TTTCAAG TTTAGACTACACTTGTCTGTGA TAAACAGCTCATTCTCTGC TTTAT  
CTAGTT TTTGATC GAAAAAT TTTGAGAGAAAAT GAAA ACGTTAATTGATAACAACATCGTCAGATT CAAA  
ATATTTCTAAAAC CAAACAGGGTAT TTTGTTAAT TTTCAAGT TAAAGGAGAGAGAGGGGGGGCTTCCTT  
TACAGCTTCTATAGCCGTTGATATCGATGCAGCTGATG TTTCTGCAGGAGATTCTTTAGAAA CCATTATA  
GAACGCTGTGCTCTTATTGGTATTCGGGAATTTCAA AATGCGAG TTTCAAG TTTGAAGGAATTA TTTGTT  
TATAACAGG TTTCCAAA AACTTATATTCGTTGTAT TTTAAATAGCTTGACT TTTGAAAGTT TTTACTGTAAA  
ACTGTGGTCCGTTAATACCCCTTA TTTCTAT TTTCTGGATGTAGCGCAGCCTGGTAGCGCACTTGCATGG  
GGTGCAAGGGGGCGGAGGTT CAAA TCTCTCATCCAGAAC TTTCTTTAAGACTTT TTTACGCGATTCTTGT  
TGTAATCTTCTAGGTCAGTCTCTGAGTAGTCGACAAA CTTCAGAACAGCTCGTAAGCTGGAT GAAACT  
GAATAACCTCTCTAGCCATATCTATAGCAAT TTTACGATAGCT TTTCA TGCCCTGTGGTTGAGAGCGTAA  
CTCACAAA GCCACTG CAAACCTCTAGCGTTGATATG GAAAAGCCATCGAATATTGTAAGCT TAAA GGAAC  
ACATATTGTGCTTCTCTGGGAACCTTCTGCTATTAGACGATACGCTTGATCAGCTT TTTCCATAGCTC  
CTCTGAAGGGAGCTTCCATAGGAGTGTGATCAATTGTGAAGGCATCGTGTAAACCCAAT TTTGTCGT CAA  
AAGCTGTC TTTCTTGAGTTAGGATACGATGTC TTTGTAAATCCCGATAGGCTC CAAA ATCCGCTGTAATA  
T CAAA AG CAAA CTGACACATTCCAATCCGCGAGGGGA TTTGTGCGCCGATTCTCTCG GAAA GAAGCTC  
CCGACTCTAAGATACGCATGAGATCTTATTAGGAATATTGCGA CAAA ATCTAACAGCTCTGCATAAGT  
GTGTCCGAGTAGGGGAACATGTAGGCTGCAGCAAT TTTGTATAACCCGCTCGGATCTCCGTATACTAAT  
TTTACACCAGCCTC TTTCGAAAT TTTCTCTCTTCCCGTAACGATGTG CAAA ACTT TTTAATTGTTCTT  
TTAAA GCCCGACGGTAATCCACCATAGCTTGGTGATGATAATGATGAGACTCTGCGCGGCTTA CAAA AGA  
GGGAATTAT TTTCA TTAATTCTGTTAAGGACTGCTCTCCAATATTGCGTACCTCAAC CAAA CTATTGTCT  
TG CAAA CGGTGTAGCAAGTTCTGC CAAA ACCGGCCATTAC CAAA AAAACC TAAAT TTTGTGAGTGTGCTG  
CAGGTAA CAAA CCTCG TAAACAGTCTAATAC TTTAGCTCGTAAA GAAA CTGTATACGCTGATTGAGAAA  
TTCTGGATCTTTA GGGTATAG TTTCTC GAAATGGGAACGAACCTGAGGGATAAGATCGGAGTATGTGTTG  
AATAG GAAATCACAAGTATC CAAA AAGACGTC TTTAAA GGGCCGAGGTCAT CAAA ATAGGGTCTCGGTAAT  
ATAAA TACTCCCGTTAACTTT TTTGATC GAAATAAA CGTATCTAGACGATT TTTCTAGGGGGGACCCTCC  
AATCCGAGCATCTTC TAAA ATTT TTTGCTGCGAGCATGGATACTTGTTCAGAGCAAGATGCGCTCCTCCC  
AACTCTCCAACAGAATCATCAC CAAA GTTGTCTAAA ACGCGACGATAGAAGTCCACAGCTT TTTG GATTC  
CCAAC TACAATCTTGTGGTCAATCAAG GAAA TTACCGCCTTCCCATC TAAA AATTC TTTCAAAG  
AAGCGTTCGCAACCCAGAGTCGATCTGGAATAT TTTGAAA TAAA GCGCC TTTA ACCACTTCTGGAAGG  
TTTTTCAAAG CAAA TATAGGCGAGTC TAAATTCGTCA CAAA ATGCGA TAAA ACGCGCTCTTTGCTCCTCAG  
AAA ACCACCCTCT TTTGCTCAACATAAGAAA ACTCCTATAAAA GCAGATTAGCCTACCACACATAA CAAA  
CACT CAAA GTTT TTTCA G CAAA AAGCTTGTGAAA AAC TGTGACCACCTG TTTACAAA TAGGCATAACT  
TTTTGTTATAAAA CAATTTAAA CAAGCTGTGAAA CAAA GTTATGAACATTATTTTCACAGCTT TTTCTCTCG



AAACAACAATGTTATAACAATTTCCACATCCCCTAAAGAAGAAGAACTAATAAATATCTCTACGAATC  
TTCTTCTAGGGGGTGGAAACTTTTGATAAGGTACAACCTT
