# Supplementary material
Source: PubMed Central journal article supplement (PMC8373233)
Supplement: iai.00108-21-s0004.pdf [file iai.00108-21-s0004.pdf]

C. trachomatis L2/434/Bu dCas9 (GRRT or complement) or dCas12 (TTTV or complement) sites

ATGACAAGGCTTCCATTAC TAAA ACGACCTCGCA GAAA CC GAAA AAGTGCAGCCGTTTCGATCTATAATTC  
AAGAAA CCCAACTC TGTTC TAGTGACTTGATCTGGCCATC TTTC T TAAAGATGGCTCTGGAATTC GAGA  
AGAAA TAGAGAGTATGCCTGGAGTATACAGATG GAG TTTAGACATGGTCTC TAAA GAGTTAGAGAGAC CA  
AA TACGATAGGAT T GAAA GCAGTT ATCC TCTTTCTGTAATTGATGCTAATAAAA AAAGAACA CAAA GAT  
CC TATGCGTCCC ATCC TTACAACATTG CAAA TAAA GGGATTC AAGCGA TAAA AAAATCT TTTC CAGAATT  
ATGTGTCATCAGTGACATAGC TTTA GATCCT TTTA CAACCAGTGGTCACGATG GGAT TTTTC ATAATAAC  
TACGTTATCAATGAT GAAA GTGTCCGTGTATATGG GGGTATCGCTGTCATGCATGCG GAAA TGGGAGCAG  
ATATTGTTGCTCCTAGCGATATGAT GGATGGGAGAGT GAAGCAT ATTC GAGAGCAGAT GGAT CAGATGGG  
G CAAA TCAACAC GGGTATTC TCTCGTACAGTGCAAAATATGCATCTGCATTGTATGGCCCA TTTC GGGAT  
GCTC TTTC TTCACATCTTCAGTCTGGAGATAAGCGTACATATCAAAAT GGATCC TGCCAATGTTCAAGAAG  
CGTTGCTAGAGT GTCAGTTAGATGAAGAAGAAGGCGCTGATATGGTGATGA TAAA ACCCGCAGGTT TTTA  
TCTAGATGTAATCGT TAAA GCGAGA GAAA ACACC ATCTTCCGGTGGTAGCCTATCAAGTCAGCGGGGAA  
TTTTCTATGATTATGGCTGCTTGCCTTCATGGGT GGT TAAA CAAA GAAA GTGTAA TAAA AGAATC TTTAT  
TAGCGATTAAGAGAGCTGGTGCAACAGCTATAATTAGTTACGCAACACCATGGGT TTTAGAATGGCTAGC  
TAAA GATGCTCTTCCC CAAA AGAGAAGTGTTC CAAA AAGAAC CAAA TGCAGCACCGAGATG TTTA CGAGG  
AGGTTACCACATTC TCT CAAA CGTAGCG TAAA AGAG ATTC CAAA ACGATAGAGAACATCTCGGCTTAGA  
AGGAT CTATGAAT GTGGGGAGAGCAAAATCTTCTGGAGCAACTTCTAAGAGCCCTAGGCGACACGCTTCT  
TCAAAGT CAAA TG TTTC CAAAGC TTTA ATAATAAGAGCTACAGGAACCGGGAT TGCT GAAA CACGCTCAT  
AGATTTTCAGCATCAATAATGGGCCGTT TTTC TCCATGCATGTTGGT ATCCAT ATCC ATGAAG ACCCGTTT  
TC TCTT GAAAAAACCAGATAGATAGGTTCTGTGTGACTGTAAG TTTA TTCCAACCTAAGCGCAAGAAA CTG  
AAA GATTCACGAGT TTTAGGAT TAGGAAG GAGT GTTATGGTATGGTCTCTCATACC TAAACAAGGATTTT  
CTTCTTT TTTA CATAATCTTCTGTAAAGGATCTCCA GAAA TAA GGGTAATCTCATCGGAAGAG GAAAAT  
GTC TTTA GGAAGAAGATCAGAGAAA CTAGCGCC TTTC GCAGTAATGAGATAT TTTCCAAAAGAAGGAGGA  
AGAGCTGATCC TGCTAAGGCAACGA CAAATTTGTCC TAAA ACAAGCCT TTTAAA AATAGATGCCCTATAG  
ATAACACCTCTTGAAGCTAATAG TAAA CACAACATCTCTTTTC G TTTC GAATACGAGCGATGTGAT GAAT  
GTGCGTTGAAGGAG ATCC TGATGGGAAGGGGCCATCTATTGTGTGTAAGTGGGCTAT GGATACGAGATCC  
TGGGT TGGGAGAGT TAGTCTGTCTGTAGAAA TGATATGAGGCTTCAGTCCAAATAGT CAAA CTATTGCCCT  
GAACTCCACAACAAAAATGTAATAACCATCTTCT CAAA AAGAAA AAAGACTGAGATGTTTTTC CACAGA  
AGGGGT GAAAGGGCGATT ATCC GCTAAGTTAATAAAA AACATCTCGAGGAGATTGTGTTGGAAGAGCTGGG  
ATATCAAAGGTC CAAACAAAAAAGAGC GAAA AGACCTTCCCTT TTTAAA AACTTC TAAAAGATCTT CAA  
AAGTCAAAGATTGAAGATCATAAGAAA ACTTAG CAAA A GAAA TACCAGGCTTCTTCTGTATGACGATCTC  
TAAA AGAGCACG TTTATTTCTCTAC GGATCTCTACAACCTCTCCATCAACAGGAGGTAAT TAAA ACT  
CTGAAA AAAGCTTGT ACTCAGCCAGGGGAGAACCAGCAGTAACCTGGTCTCCTG GAGTAACCT TTTA CCT  
CTAAA GGAAGGGGAGC GAAAGGCCTCAA ATCC ACG GAAA CATAGGTG GGGTCCACCTTACCGCAAAA ACC  
CGATTC CTTCGGAGCTCCC TTTAAA GACAGATCTAATCCGCGA GAAA CAACTAT TTTC ATATCTCGGGAT  
TATAGAAGTT TTTA TAAGGGAATCC AATTTTT TTTC TTACTTTT TTTC TGAGAGGAGGAT CAAA TCTTTC  
AAA GCGTTGGAGA CAAA TGGGATGAGT GACCAATATCATTGGTTACTTC CAAA ATAAGCTCTTCAG TTTC  
TTT CAAA TATTC ATTGCAAGAGGAAC GAATGT TTTC TAGAGCTCGCC ACTCTTCAGGAGAAAAGTTATCT  
GGAT TATTAGCAAATACTTCCA CAAA TTCGC GAGT CATTC CCGTCTGTTGGAGAA TTTCCTGCGATCT CA  
AATCTAATTC TT GGAT TT TTTC CTGTGTTT TTTC GATCAGCA CAAA GTAGTCCAGATCGTTGTGTCGTCAGT  
AAGAGTTGCTCCAAAGGAG GGGT CGAAGTCTAT TTTATAAA TAGAGA GAACAAA TTTTATAGAAT CTATA  
ATTT CAAA AGCG GAAT TATT TTTC ATAACAAAAATCTCGATGT TTTATTTAATAA TAAA ATT TTTC TTGT  
TT CAAA TGATGTAATATTGCTCTTT CAAAT TATTC GGGCGTATA TTTC CGGACTAAA AAGGGGAGCCATCG  
TGGAT TATCTAGAAA AGCTGCAGTCC TTAATAGAAA ATC ATCC TTTC GGATTTT TTTAG CAAA TGGGAAGA  
GTACTGT TTTA ATGATGTCGTTAAGGGGACGAGCTAGTTGTCTTACTG GAAA AAATCAAGGGCTCAACT  
ATAGCCCAGCA CAAA GGAAGATTGCT GAAA GTGTA ATTC TTTA TGGGAACAAC TTCTGAAGGAGAAG  
AGAAA GATAAA GTACTC TCTCTGGTT CAAA ATGTCCAACAACAACAGTAAGAAT CTGCTAGAAA TAGC  
TCTTCAACAGG TAAA AAAATACGAAG ACTCAGCCAATTACAAGGAAGC TTTA C GAATAGTTGG CAAA CGA  
GACG GGAT CACCT TTTC TCATTGTCTCGGACGT CAAA C CAAA CTATGCACCTAAGTGAAG GAAA CAAA  
TT TTTC ATCAAGGTGGTTGGG GAGT TGGAGAAA TCATGGGAGT CTC TTTC CTTCACA GAAA GTTCTTGT  
TGAG CAAA AAGGGGT TCTTACGGC GAAA GATATCTCT CAAAAA CAGC TTTC CGTATGTTAGTTCC TTTA

AGAAAAGATCACTTTT TAGCAAGAAGG CAAA GTGATCCAGATGCT CAAA AAGCG CAAA CTCGCAAAGAGC  
CTGTAGCAGCCATA GAGTGTCTGT TAAA AGATTTA GGACCCAA GAATGC TAAA GAGATCC GAAA CGAGCT  
GGTGGAGCTTGTGATTCCTGAAGAAGATTGGAGT CGTTGGTGGCAATCTGCTAAGAT TAAAAT GAAA AAA  
GATGCGC GAATTTA GCTCCTGCGTCTT CAAA GATCC TTATGTATTCGATCC GAAA GGATTTCTCAA  
TTTC TCAATTACAAGCCTC TTTA TCTGGAAGCAATGATGCGAAT AAGAAGATCACTTCTTGTATGCT CA  
AATAAGAGA TTTA GGAAGTGAGCT GAAA GATGAAT CTAATCGACAATCGGTCA TAAA GAGT TAAA AGCT  
TTA GA CAAA CCGCTGATTC CGC CAAA TTGATCC AAAGAGCGATGTTGTTATCA GAG TTTCTTGGAGAAA  
AAGCTCCG GAGTTA GAGTAT GAAA ATATTGCAAA ACTC TCTGAAGATCAGTTATTC GATATTGT GAATAA  
CATAGAG ATTC TCTC TTTA CAGAA GAGT TTTCTGGC TTTAATCCACTC ATGTTCTCCTG CAAA GGTTCCT  
GTGTATACCAA ACTC TTTCTCACAACAAGCACGTCTATGCTTCGTGAACAGGTC TTTA AGGTCTT GAATG  
CAGA TAAA GAAGCTCGCGA GAATAT TTTAAA AAAAGTT CAAA CTATGATTGAGCAGCC CAAA CTTTATCC  
AGAGCTT CAAA CAAA GTTA CAAA CTCGTGTGGTTGATGGAGAAGACGG TTTACAAA CA GAGTCTGATAAG  
AAG GAAA TCGAGCGGCAAATGCTTGCTAGCGCATTGGAGCTTATGCACAAAGTCGCTACAACGCC TCAA  
AAGAT TTTAGG GAAA AA ACTCTATTC ATT TTTA GTTGACAACGGTT TTTAGTTATTC GTCAAATCATAGA  
TCAAGCTTCTATA GAGTATCT TAAA GAG CAAA TTTA TTATCTTCTAAGTGCCCGCAA TTTACTC AAGGG  
GATCTGGGAGT TTTAAGAAG CAAA GCAGAAGTTGTGCAGCCAGCTCTTAAGAGAGGG ACTCTAGAAGAGG  
AAGAAA ATATTC CAAA GACTACTTCAGATAGT TTTA CTCGTAT GAAA AACAACTACAATCTCTGGTAGG  
GAAA GAGATGGTAGA GAATGCTAAG GAAA TAGAAGATGCTAGAGCCTTAGGAGA TTTAAGAGAAA ACTCT  
GAATACAAA CAAA CTCAGAGAGACGGGCTAGACTACAGGAA GAAA TTCGTGT CAAA TCTGAG GAAA TCA  
ATCGAGCAAAAATCTTAACTAAA GATGCTGT TTTACAGATTCTGTTGGAGTGGGTGTGTAAGGTTGTTCT  
TGAAA GTGACCAAGGAGATAAGG CAAA CTACACTATATT GGGTCCATGGGATGCTAATCCGGAT GAAAAG  
ATTTTA TCAC TAAA ATC TAAA CTGGCCAA GAAA TGTTG GAAA AGCTGTTGGA GAAA CTGTACTG TTTCT  
AAGGCAAGAAGCACAAGATCAAG GAAATTTCTTCTATATGGGAT TAAA CAGAAA TTGGAGCATAGCGGGA  
TCGAACCGCTGACCTCAACAATGCCATTGTTGCGCTCTACCAACTGAGCTAATACCC CGAGGGAA GAAAC  
TAGGTTATCATG TTTA CACGATTTA GGACAACAAGCTGT CATCTTACTG GAAA AAAAGACAGTAAGCAGC  
AGTGCCTATAGAGAGGT TTTA TTGT GAGTCTT CAAA AACAGTTACCTTCCTTTTC TCC GGATTC TATTC  
TTGG TTTAGCGCAGGC TTTCAAGAGGATCC TCGTGAGGATAAGATTAATTTA TTACTAGGTACTTACGA  
ACGG GAAA GAAA CGCTATGGGGG TTTCTCGAGCGTTA GAAA GGCTCAGTCTGTTTTT CAAAACGATGAG  
AAA GATAAAA AATTATCT ACCCATCAAAGGATCGTCTACCTTTTTA GAA GAAA TGGCAGCTC CAAAT CAAA  
GAGAAGTGGATGCTAATCGATGGGT TGGTGTGCAGGCAATTGGAGGTACAGGAGCCTTACATTTA GGGGC  
TTCTGTATATGCCAACGCATC TTTA GCGGGTAAAGTGTATATTC CTTCTCAAACATGGGGGAACCATTC  
AGGATTT TTTCTCATCAAGGGT TAGC TTTAGAGTATTATCC TTACTATGATCAGGAGACCAAAGA ACTGG  
ATTTA CAGGGAT T GAAA GCTGT CAAA CGATCTGCTCCTGAGACTTCATTAGTTCTGTTGCATTGTGCTG  
TCATAATCCTACAGG GAAA GATATTC CTC TTTCC GAGTGGCCA GAAA TCATTACGATTATTAAGGAGCGG  
GATCTTATTC TTTCCAAA ATATGGCTTATTTA GGT CAAA CTAGTGGGATAGAAGAAGATCGTCGTCCTG  
TGCAACTGTGTATAGAAGCTG GGGT TACTACT CAAA TAGCAGGAAGCGCTAG TAAA AATTTTTC GTTATA  
TGGTTCCTGTGTA GGATTT CAAA GAGCTATCCATCAAGATAAA CAGGATTTAAA CCGTATTTTATCC TTT  
TTA GAAGAACAGATTC GTGGG GAGTACTCATCTCCGGCTAGAGAAG GAGTTGCTATCGTACTTCTATAT  
TAAGCAATCC TTA CTACGGCAA GAATGGGAGCTT GAAT TGAAT GGCATTC GGCAGTC CAAA GAAGAGAT  
TCGTTC GAGT CAAA TGATTGCCATGC GAAATGTAGCGGGGCACTC TTTTCGA TTTCA TAGCTTCTCAGAAA  
GGATTT CAAAGGTATCC AGGTT TTTCAAGGAACAAGTGCTGTTCCTTAGAGAAGAGCTTGGTA TTTACA  
CAACCGCAGGCGGAAGATTC AATTTAAA TGGCATTAC GGATAAAA AATA TAAA TCGTGTT ACTC ACGGT CA  
AACTCAGGCTTAT GAATACCC TCGGTCCGTATCA TAAA CGCGTTCGGTTCATTACGTATCTT CAAA TTGC  
CTTCGGGAT TATTGTGAGTTG GAAT CTTCTCGAAGTGCTTAC GAGTCTATCCAGGATACATTC GTTCGG  
GTGTGTTCCAAA TTTCTTCCA TTTCCGGCAAGGGT CTGATTC TCAGGCCCTTGTGAA GAAACTC AATGCT  
TTTTATT GAAAGAAA AAATTCG TTTATTGGAAGAGCGT ATTC TTTCTATGGAAGAGGCAAAACAGTCTCC  
GCC CAAA TTTTCAGAAA TTTCTATCC TCGTAT TTTCAATCTCCAT TATGGGAA GAGTATC TTTCC GAGAT  
CCAGCACACTGGGGT AGTTCTTGT TGGATTAATATAG GAAA GCGACAGGGCGT TAAA AA GAATTC TCCTG  
TTG CAAA CCGTAAGGTTGTTGTG GGGT TGGTGGAT CAAA TTGGTGAAGCGCAGTCTCGTGTACGATTCAT  
CACCGATGT GGGTATCAAACCTTCTGTTATGGCGGTTCTGTTG GAAATTC AAACTT GGGTGTGAAA GAT  
CAGCTACGTACATTAGCTAGGAACGTGCTAATCTTCCGGCATCTGCT CAAA CAGATAGTGATAAA CAGG  
AAGC TTTA CATCTCTTGCAGGCTCTAGA GGATTC TTTA TCTCTATCAGAACAAAATGAT CAAA CTC TCG  
TGGAAT TG CAAA TGGTCGTGGGGATCC TA CAAAGAAA CCGGAGGCTTCTATACTTAGCGGTAGCGAT CAA

AGT CAAA TAGATGG GAAA ACTATCGAAGTTGGAGATGTTCTTGTGACCACAGGAT TGGATGGTGT TTTCC  
CTCCAGGACTTCTCGTTGCTACAGTCAATGAAGTCTTCC TAAA AGTGAAGGAT CTTGTTC CAAA AAGAT  
AAA AGCACA ATCC TTAGCTCCAGATTGTTCTACGGT GGAT TT CAAA GTGTTACCACCAATGGAT TTTAAT  
CCTAATGATCGTCTGATATT CAAA G CAAA CAAA G GAGTAGTTAGAAG GGG TTTA GTTAACGTCTGGT  
TGCAAAA ATCC ATTGCCCTTGTC ATCC AAGCCTC GGAT AAA TACGAAGGCCA TTTCTACTTGCAATGAT G  
AAT TAAA TTGGTGTAGGAACCT TTTCTGCTGCT TTTCTGTACAATCTCTCCTGTCTATCTAACCC TTGACG  
TT GAAT ATAGAGATG GAGT TGATCTGGG GAAT AGCAAGAGG TTTCTATCTCCTAA GAAA GAAGT TTTCTCAG  
TCGATGA TAAAAAATCG ACCCTTATGTTCAAAAAATAAGTCGACG ATTCCTTGCCACA ACTCTCCTTCTT  
CTTGTAGTAAGAAA G TTTCTCTACACGTATGTTATGA GGAT GTATATTCCTGAGAGCAAAGGATCC GGA  
AGAAA AAGGAA GAGT CGTT GAAA AGACCGTATAGATTT TTTCTGCAATAATAG ACTC GTATCC TTC TAAA  
GGAGT GTT TTTCAATAATGTCTGAGC TTTATT GAAA A TTTCTTCAAACAAGCAGCAAATTC CCTGCTA  
ATGATTC TAAAAG TTTA T GAAT CAACGTTCCCGTTAGAGAGCCTCCAG GAAATAAA AGAGAAGGTGACAG  
TTCTT GAATAGGTTCC GAAAAGTGAAG ATTC TCTACCGTAGAAGA GAAA GAGTGAAT AGTTCGAGAAGGG  
AGATGTGGAAGA GAAA AGTATG CAAA TTGAGGAAGACGTTCTCT ATCCGGAGT TAGAGAGC TTTCTAGGAG  
GTTGGAAGCTTGAT GAAA ATAGTTCCGGAGATGAGGAAGTCAAGG TTTCTACT TAAA TGAGGAACGCTATG  
ATGT CAAA TAACAT TAGCATAGTTAGCAAGAGCA GAAA GTTTT CAAA TGCTTAGTGAGCG TTTCTCTATA  
GGAGAAA ACGGAATAAA TAAGAAT TT TTTAGCTCTTGTGCATGCGACATACAT TTTCTCGCATATGAACAG  
AAG GAGT TTTCTCT CAAA CAAA TTAAGGCAAGAGCAAATACTACATCGTATTC GAGCCCT CAAA AAGA  
GT GAACGGTCGTAATT TTTATCAT ATTC TCGTCATTAGATTGCGACGA GAAAGAAA GCTCTTCATCATA  
TTCCCTGTAATCA GAAT ATTGATGAGATGTAAGAG CAAA TGATGG GGATTC TCTGTAGT TTTATCAAGAT  
ACAAGCATAGCGCTTCTAATTC TTG GAAA ATGATATCTCCAAGAG GGG CAAA CAATAATG TTTCTCCTAT  
GG CAAA AGATAAAA ACGT TTTCTCCCATCAGCTTATAGAAGGTAGCTAATAGAGAAT AGTGGTAGAGATGT  
CGATTC AGAGT GAAA AACAAAGAAGAAA ACGT TTTA AGATGCTGGT GAATCTCCGTAGAG GAAA GCT GAA  
ATAGCCGGCTCATCAAATGGCTT GAATCT CAAA TTGATTC TCTGGGTACAGAAGGGCTTCCAATAGTAG  
AAT CAGAAGGTAGGG GGATTC TGTGCGATCAAAAATACGTT TTTCCAAA CAGTAGGCCATGG GGAT GGTG  
CTGT GAGT GATTAGCTT CAGAGCCTGT GGATAGTCTTGTACTAGAACAGCCATA TTTCTCAAATG GAATGG  
AATACGCTGATCGAAGATAAGAAGCTGT TTTAGAAA TCCATAACG TTTCTTCTT GAATGTCTTCTGAGGA  
GAAGAAA TGAATAGGACTGAACTCT GAGTAGGAGATCTCCGAGCTCCC TTTAGAAT GTAAAAGGGT GATAC  
AGAAT GT CAAA TG GAGTCTCTAGAAA CGGTGTGGGAAGA GAAA ACAAATGGTTGAGACCTTGATAAGCT  
CTGGGGTGGATCGGTAA CAAA TATC TAAA ATAAGCTGAGCTTCT CAAA GGAAG GAGTGT CAAA CTTGCAA  
GTATGTGGGGAGGCTGCAT TTTCTCCATTCATAAAA TAGACTGT TTTA GGGTCTCCGATAAGAAA AAGGGAT  
CCTGAATAGTCTGGAGAAGCAAAGAG TTTAGAAA AGATCTGCCACTGACG CAAA TCAGTGTCTTG GAATT  
CATCGATCAAGACTAGCT GAAA TTG TTTACGTAGTGTGTGAGACGACAGTATCGTTGTGATCTAGAAGAGA  
TTCTAAA GTAGCTATGC TTTCTATCATGG GAATAGGAT TGTGCGCAGT GAGT TTTCTAGATGTTGTGCACG  
CT TTTA AGTAGCGTATG GAAA ATAGGTTCTT CAAA GCAAAAAGGAT GAGCTAACTGT ATCCAATCTTG GA  
AAAAAGGATCTAAA GGAGAAGCTGGAGCACTTAATTT TTTCTTATTGCGGT TTTCTCCTCT GAAA CTTCTG  
TACC ATTC CTGG GAAA AACAGCAT ATCCAAA GAAT AAGGAT TGG TTTCTGAAT TGTGACAAAAGCAGGG  
AGT TCCCGCTCGATAGAGAGATCGC CAAATTTAAA ACGAAGAGAGAAA GCTTGCA TTTCTCTCGAGAGAGA  
GAGGAGCTAAGTGTGAGTAGCAGGAG ACCCAAGCT TTTAGTT CAAA CAGGGT TATCGATAGAGGCGAGAG  
CGC TAAACAAA GTGTGGAAGTGAATCTTGAAGTAGTCTCTCTATTAGGTGGCGTG CAAATT GGGT AGTA  
GCGCGGTGATGATAAGATAAGAAGGCGTATTG CAAA GGAGAGAGAACCCTGTCCCAAAGATT TTTA CGTA  
AGTAGTCTAGGATATACTGTTGTATGG CAAAAGGCTCTGAGAAA ATGGAAGACGGCT GAATAGGCTGTAT  
CCAAGGGAAGTGTGCTCCAGTG TAAA ACGACAAAATCCAT GAATAG TAAA GATGTTCA TTTCTATC TAAA  
GTGGCCAGGCTATTAC GGATCTTCATG TAAAAGCTGT TTTACT CAAATTTCTGAGGAAGAGATATAGGGAG  
GTAAGG GAGTCCC GGATGAGAGAGT GCTTGGGA GAAAAGACTC AATGCTTG CAAA AGGCTTGCTT GAAT  
ACGCAGT TTTAATTC ATTGGTAGCTGCGTTGG TAAA TGTAACCACCAAATGTTT CAAA TCTGTTCGATC  
GAGCCTTCTAATAACGAGCGAA GAAT CACTTGTTCATGGT GAATGT TTTCTCCAGTTCTGCGGAAGCTT  
CTAA GAAA AATTTCT CCA GAAA CAGAAGCTGTTGGT GAAA AATATCAAAGAGCTCATATCAGT CAAA TT  
GACT ATCC TGA TTTATAAA GAGA GAAA GAAGCTGCGAGAGCACGTCATTAGAGAGT TCTGAGCAA TTTCT  
TTCTGTATCACGATTATGGAACCACAAA ACTACTTGTTAGG GGGT CTTCTTCGCTATC TAAA AGTTTT  
TTTA TACTGTGACGCT GAAT CAGTTTT TTTA ATGTATTC CCAGGCTTGAGCAGAAGGAAGAGGAACAG  
CTTGAT CAAA TAAGAGATCATACAGGT GGATCGCGC GGATCAAGTAAG ATTC TGGAGAG GAAA AAGGAGG  
GAGGAT AGGCTCAATGTCATGAGGTGTAACGCGGA GGATGGTAGCTTC TTTA GGAAGTAGATGAGAGGCT

TGTAGTAACGCTAAGGATAGGTAAGGATTCATAAATAAGATTCAGTTCAAAGGCATCTTTAGGGAATCCAT  
GAGTFTTCTGAGTFTTCTAAAAGGCTTCTCCC GGATGCATAGAAAATAGATATACCCCTCAAAAACATAC  
GCCATGAATCGTCCCTTGAAGATGAATATTTTTTAGGGGAGAGATAGGAGTAGAGGAGGGACTTGTGA  
TCATTAGGATGGAGTGGGTCGTGAAAAGTTGATCGGAAAATACAACA GAAAAGGGGGTGTAGCAGGAT  
CTTCTGCAAAGTTCTAAGCGTTACTTACAGAGTCTGTACATCGGTGTATAGAGATCTGTAAAAGGC  
TGAAAATAATTAGTAGTGGGTAGAGGAGTTTTA GAAGAGAGAAGGTGGTTCCAAAAGCTTTAGCATCG  
TGAGGACTAGGAAA GACTTTTCTGATTTAGAAAATAGTGC CAAA GGATGAAA GAAAAGCCATGTTGCG  
TGCTTAGGAAAAGFTTAAAGGATCCAAAAAGCCAAAATTAGATGTTGTAGGGATAGGTGTGAAGGTAA  
CGTCTTAGTTGTATCAGACTTAAA CAGGGATGGGGCCTTGT CAAA TAGCGGGGAGACTTGAGCCATCCGG  
TAGTAAACCTGGTAAGACTGATGCAACGGTTCAGAA GAAAAGTFTTCTTTAGCA TAAAGTTTCCAGAAA  
GATGTTCTTCTTGAATAGGCACAGCATCCAACAAATGTTTCAAAGCAGAGCTCGGTAATGCTGGATTC TT  
GGATGAAGAGAGATAACTAATATGGAGCTGGTGTCAAATAGAAA CGATAGTCTGTA GAAAATGTAAGTTA  
TCCTCATCTTCAAGTGGAGGAAAATA GAAAATCTTCTTGAATGAGAGAA GGATCAATAAGAAA ACTGGTAT  
CGAGTGAGTGATCTTTCAAACAAA CTCCAAGAA TAAAAGTATACCC TTTAGGAAT TAAA CTGAGACTATT  
TAAA GACCC TACAAAAGGCC CAGGTTGATTGTACAGTTGGCTATGACCAGGAATATGTGAGAGGAAGTCT  
AAGCAAAACTCAATGAAAATGGT TAAAGAGCAAGAAGAGCGCACAAAAGGTTGTAGTGT CAAA GATAAGG  
AAACTAACAAAGCATACTCTTCCGTAGAGAGGAA GAAAATAT TTTCTAAAGCA GAAAAGATAAGACGAGA  
GTGCTCTTCGTAGGTCAAATC TTTAGATTCATGTAAC TGGCTGTGACTTGTGTAGTGTGTGAAGAAGA  
GGAACGACAAC TCCCATGTCTCAGCTTCATTAACGCTACCAGTATCATCAATAAA CGGATATTCATCCA  
AAATACGATGGATGAGTTGAGTAAGAGGAGAGTCTT CAAATGATAAGGATTTTCAATAGTGCCTAAGTTT  
ATGGGTAAAGGAAGCCATTCAAATAGTCTCTAAGGGGAGAGAAGATCAGGATGAGAAAAGGATACGAAGT  
AGGTCGTTCAAGAGAGCC TTTAGAGAATAGAAA GGTCACTACTAACAAGAGCTTGT TTTAGTGTGCGGG  
CAAATGTTTTC TCAGTTCAAAT TAAATATAAAGGAAGATGAGGTTCAAAGATCCCTCTTAACAAGTTTC  
GTATTTAGAAA GATTAGAAGAGAGAA TAAAGATTTCTGAGCAGGAACTCCAGAATGGAGAAGCTGAGAA  
ACAAGC GAAAATAATTGATGGACTTCTCGGGATGCGGAAGGAGCTTGTCTTACAAAATAG CAAA CGGTG  
AATTAGAGAACAGCT CAAAATCTATAGGTTGTAAA TG GAAA AACTGTCTTTTA CAATGTGTAAAGAA  
AAGTT TTTCTGATGGGT TGAACAGTCTTCGTAGGGAACGCTATAATC TAAAAAAAAGT CAAATAGCGAC  
TGCGACAAATGAGCAAGGTTGGCTAGTAATGCTAACC GATCCGTTAATACATA TTTCTCCCATGTTCTTT  
GATGTGTTCTG GGATTC TCGGG GAAAGTGTGCCATCGCTTTATCAGACAAAAGATCCCC GAAATAGGC  
TGCGCTAGGAGAAA AACAGTAAAAGTGCACAGG GAAATATTTTC TAAAGCAACAAGAAGGAGGCTACA  
TGTGGGGAAGTTGTGGATACCC AAAAATATGCAGAGAACAAGGATATTCGGAGGATGATCCAGAATCG  
AAGAAA AAATGGTTCTAATGGAGTATAGGAGTCTTTAAGTTGTGCAAATAAA TTTCAAATAGTAAGGAT  
GTTGGTCGAAGGCTCTGAGAAAACGTGTAAA ACTT CAAAAAATAGAAGAAA GTTCAAATAGATGGGAA  
TAA GAAA CCTCGGAAGAA GAGTTGAAA GAAGATTC TTTAACAGGTTA TAAATAGTTAGAGGGAGGGTAA  
TGTGATCGGGGGTAGAGAGGTCGACGAGACGCGTCCCGTAAA TAAGTACAAAACAAAAGCGTCAAAGA  
GGCAAAAATATGTGTCCCATGAAGATGTGATTGGATGAAGCC TTTACCAATTC TCTTCGTAGCCAGTGA  
TCTGTGTCTGAGCTCGGCACCA GAATCCATCGT CAAATCATGG GAGCAAAGTTGATAGAGAACAGATCTT  
GAGCAAG TTTAGCCAGCAAGACTTCGGATAGTTGC TAAACGTTGCTTGGCTGTGAGATAGTTCA TTCAT  
CGGTTTACATTCATGGGTATTATTGCGAGGAAA CGATC TTTCCGTGCATTGGTCTTACACATTTCTT  
CAATTA TAAATGACAATCTCTATAAGTTTCTTTTAGTTT TTTCTTGTGTAGAGG GAAAAC CAAA GAAGA  
AAACGCTAAAATTC TGTC TTTAGTTAGTTTCTTT CAAACTCTCCGTTACAT CAAATTAGCCCCCTTTTCA  
GGTAGCAAAGCAGATAGGTTTCAAAGAGAAAATATTAT TTTATTCACTCGGGT CATC GAAATCTCAAATG  
CTATTC TAGGATATA TTTCTTCCACATCCATTC CGTTGTAGGAGGATAT CAAATCTTAGTATTGATGCC  
TTGCCATTC TGCTAT TTTCCGGCCCTGCAAAAATGG GAATATTACCAGAGATGCTGCCTATTGAGGAGCTA  
TCCAAAGCAAATGGCGCAATGACAGCAGCTACCTATTC TGGAAAGTAT TTTAGGGTCTTGTTTA GCTCCTC  
TTATGGTGGATTTA AC GAAAGAT CAAATCACAATAAGTTAC GAGT TATCGGCCTG TTTCTGTGTAGTCTC  
TTCTGT TTTAAG TTTATTTATTGCGTTAGGCATTC GTGCAAGTAATG TAAAAA TAAAGGACAGAAA ATT  
GCTTATGTAAGC TTTAGAAATC CAAAGCAGGTC TTTCAAGAGACGCGCAATATTGCTTATCTGATGATTT  
CCGTATTCCTTGTTCCTTCTTTCTTCAAATTTGGGGCCTACGTTCAATTACAAATC ATTCCTCAAATAGA  
ATTTAC TTTAGGATATTC CAAACATTATGGCGCGTATCTAT TTTCTATTGTAGCAGTAGGTATGGGAGTT  
GGCTCTTACATGGCAGGATGGATTTCTG GAAAAGGATATCAAATTAGGGT TTTCTCCATTAGCAGCTATTG  
GTGTGGGCC TTTCTATGATGGTCC CAAACTTGCTGTCTT TTTCTGATCACC GCGGTGCTTAT TTTACTCTC  
AAATTTAGGCCCTTGTGGAGGAA TTTATCAGGTTCC TTTACATGCCTATATTC AATTCGTACGCCAGAA

CATAAAAGAGGCCAGGTATTAGCTCTCAATAAATTCATTAGATTTTTCAGGAGTTTTATTAGCTGCCGGAC  
AAATTAGATTATTAGGTGCTGGCAAAAGATTAACGCCCGATCAAAGCTTTTATATATGGGCTCCTTAGT  
TGCAAACTAAAATATACTTTTCGCTGTGGATGTAAAAGAGCATGTGTATCGTCTTCTGCTTACTCGTGT  
TTAAAGAGACAAGTGGGACCAGCTTCTCTTCTCCAAGGCTGAAGAAGTCTGGTGCCTTTCAAAATGCCCG  
CAACCTCCTATAAAAGAGACGCGACGTATTTTAGCATTATTCCTAAGACCGTAAGAAGCTGTGTGTTTAT  
TTTAGATAAAAGCTCTGCAACCAGGATGGACTTCTTATTTAATACCGCATTGTGTGCCTACTATTTCTCT  
TATGGCGTGAAGGGCAGGCTCAAAAGCAATGGATCGATCGGCAGGTGGTAGAGGTTAAGGCGTTGTGA  
AGAGACAACCCCTCTTTAGGCGTTGTATGTCTTGGGAATCAAGCGCAGAGTCAAGTCTTCTTTCTCAGTT  
GCAAGCCTCAGGATTTGGCTGTGCAATCGGGGACATTAGTTCAAGATTCCTGAACTGAAATATTCCAAACAT  
TTAGCGAACTAGAAAAGAGTGTGGCGCGTAATTAGGTGAAGTAACCAAAATAGACAAAATCTCCAGCGCAC  
ACTTTTCAGCTTCTCTTTCTAGCAAAGTCTTCTATCACAGCTAAGGGCTGCGTAGCAAATAGGCGAATT  
TCTCTATCTGTTAAGCGTAGTAAGACCCAGAGAGGTTCTATACCFAAAAGTTTTCGAATTTTTCCTCAA  
CTTTACGAAATAGGACAAATGTTTCGGAATAAGCGAAAAGAAAAAGAACATATTAGGAGCAAGAATACAAGA  
AAGGCCATCCAAAGGAAACCAAGGGAAATAAAACGCTCCAAAATAAACGAAAACAAGAAATGCGTT  
TCTCCTGCTGATCGGAACAGGGGACCAAAAAGCGTCTCCAAAAGTGTTAGAAGTGTGTATGCCAAGA  
CCTCTTCAAAGATCGGTTCAAAAAATTCATACGCACAGCATGAACAGCTTCGTGAGACAGCACTTCTTTC  
CAAAGAAAAGAAACCAAACAGAAAAGAGCTTCAAAAAACCCCTTGCCTAGTTGAATCGACACTCTGTTA  
TCGGTGATCCATGTACATCCCGCTTCCAGGCATCTAAACTTTTCATTAGAGTACACTACCTCTAAAAGAG  
AAGGGTTCACATCGAAGAGTTTCTGGAATTCATGGGAAAAGGGTGGGATGTACAGGAGCTTCTGCTAA  
TGCCTTTCTACCCGAAGAAAAGAAAGCTTGTTTTCTTTCAGGGCCAGCAAGGAATCCCTTCAAATTT  
AATTGTAATAAAATCATCGTAAGGATCCGAAGAGGGGGAGAAAGAAAGAAATTCAGTGTATTCAGGCTG  
CTCTCAAAAATGTTGGTCTACAATAGGAGAAAAGGCTCCGGATCTGTCAAAAAGAGATGAGTTTCTGAGAC  
TTCACCATACGTAAGTACAGGTTTCAAACCAAAGAATAGCGGTGTCCAATAGGTTGATGAGGGAAAAGAT  
CTTGAATAACACGAAGAGTTTACGTAACAATGGGATCAAGAGAGCAAATGTCCCTTGACATTTTCTGAG  
ACCCAAATATCATTGGGTCCCAGGAAAACCTCATCGTCTTCAAATTTCTTGGCTTTAGCAGGCAGGTCAAATA  
TGACACAAAGCTTTTACCTATAAGCTCTCAAAAGAGCTTTCTTGAAAAGCTTGAAGAGTTTCTTCGCA  
GTTCTTCTGTCAATTTTATTCGGCGGATAGGTTAACACCCCGTTTAAAGTCCCTGACAAGGCTTCTCGTT  
AAGGCCTTACGATATAGGATCGTGTAATTAAGGTCAAAGGAAGAAGCTGAGTTTCTTATGTTGCTATTC  
CACAAGCGCGCTTCTTCCGCTCTTCCGAAGAGAAGAGCGGCCTAGCTCATCAATGCGAATAGCACCTGGG  
CTCTGCTTCCGGATAGTATGTCTGAAGTATTGAGAACTCTTCAAACCTTACGAATTATAGGATACTTCTGC  
TTCGTTACAGGAAGTCTCAAAGAAAACGGCTCATAGGAAAAGAAAACAACATTCCTTCTCAATGCAAACTGC  
TGTTTCATTAACAAGAAAGTGGGTGTGAAGAACCGTAATTTTAAAGAAAGAGTATTAGAGAAAAGCG  
TCCTCTGGAAGGAAATAAAATCAATAAAAGTAAAAGAAGGGACTAATATAATCGTATAAGAAAAGT  
TTTTTTTTTTAAAGAAAGCTCAAAATGCGAGAGACTAAGATCCCGCTTATTGGCATTGTGTATGAAAAA  
TCCCTAATCATTGTTGAATCCCAAGCAAGATTAACCAAAAGGTAAGTTGTTAGGAGAAGGGTTTATTC  
AAAACCTTCTCTTGGGGCATATTGTTGATCTTCTGCAAAAGGGCAAAGTATTGATATTGAAAATGGACA  
AATTCGGACTACCAATTTTAGAAGGAAGGAAGAGGTTATTCGAAAACAAACGCCGAAGCAGAAA  
TGTGATGTAGTTATCTCGCTCCCAGTCCAGACCGAGAAGGAGAGGCTATAGCATGGCATATCGCGAATC  
AGCTGCCTAAGGATACATAAATTCACCGTATTTCAATTCATTCATGCCATTACCAAAGGAGCTGTTACCGAAGC  
CAAAAGCATCCTAGGAAAATTGATATGGCGTTGGTCAATGCACAGCAGGCACGACGCTTTCTAGATCGC  
ATTGTGGGATACAAGATCTCTCCGATCCTAGGTCGCAAGCTGCAACGTTGGTCTGGGTTCTGCAGGAA  
GAGTGCAGTCTGTAGCTCTAAAATTAGTAGTAGATCGGGAATATGCTATAGAACGACAAATTTCCCGTCA  
ATCAAAAGATATCCGAGTGCATCTAAAAGATCCCAAACCCAAAAGACATTCCTGGGCTCAAAAATTCC  
GTGAATGGGAAAGAAATGGGAAAAGAAATTCCTGAAGGAAGACTTCTGATGAAGTGTATTTAATTGATT  
CTAAAAGAAAGGACAGATGAGATTGTCGCTCTATTAGAATCAGCTACATATGTTGTAGATCGTGTAGAGTC  
TAAAGAAAAGAAACGTCACGCCTATCCCTCCGTTTATTACTTCTACGTTGCAGCAAGAAGCTAGTCGTCAT  
TACCGCTTTCTCTTCCAGAACGATGAACATAGCGCAGACTTTATATGAAGGGGTAGAATTTAGATAGTC  
AAGGTGCTGTGGGATGATCACATACATGCGAACCGAATTCCTGACGTACGGATCCGTAAGCTGTAACA  
GGTGCGCAATATATCGAAGGTCATCAAGTAAGGAATTCGTTCTTCTTCTCCGAACGTGTATGCCACG  
AAAAGAAATGGCACAGGATGCACACGAAGCTATACGTCCTACAGATGTTACAATCACTCCGGAATCGATAC  
GCAGTAAGTTAACGGAAGATCAGTACAAGCTGTATTCAAAATATGGAAGCGTCAAAATGTCATCAAAAT  
GATATCCGCGATTTACGATACACTCGCATTCGATTTACGACGAAATAAGGATATCGATCTGCGTGTACA  
GGCTCTTGCAAAAAATTTAAAGGGTCTTAGCTGTTACGAAGAGAAAAGAGATGAAGAAGGGGATGAAG

AGGAAAACATTCATCTTCCGAAGCTTAATGAGCGAGATGTTCTAACAAAGGAAAGAGTTAGAAGCAGAACA  
ATCGCATACCAAGCCCAAACCGCGAFTTACAGAAGCTTCTTTAGTGAAGAAGCTCGAGAAGTCAGGAATA  
GGGAGACCTTCTACCTATGCCACTATCATGAATAAAATCCAGAGTCCGGAATATACGTTGAAAAGAGGGC  
AAAGGCTACGTCTACTGAATTAGGAAAAGTAGCAATCAGTTTGTAGAAAAGAAATTTCTCTCGTATTAT  
GGATATTGGTTTTCAGGCTGGCATGGAAGATGAGTTAGAAGTGAATGCTGATAATAAAAACCTTGAAG  
CAGCTATTACAAGAATCAATGAACTCTTTCTTCTCAATAGTCACGGCAGAAAAGAGGGCCTTTATCC  
CTCGTATTGTGACAGAAAATAGATTGTCCAAAATGTCAAAAAGGAAAATTAGTAAAACAAAGGCATAAAA  
TCGCTATTTCCAAAATTGCTCCGAATATCTACTTGCAGACTATAAAAATTTCGGAAGAGGAGCTGACGTT  
GACAAAACGAGTATGCGGAAGATCTCTTGAGGATGCACCCGCGCTCTGTGCGGAGGAAGAAATGAAAG  
TCCGGCATGGGAAACAAAAGAAAGTTTCTTGCTGCGAGAAGTATCCGAAGTGTCACTACATTGTTAATCT  
TTTCAAAAAGGGAGAAGCTGGGGCTGAGCCTGAAGCGACAGTGCATTGTCTCTGCAGAAAGGATGTACAGGA  
CACCTTGTGAAAAGACGCTCACGATTTATAAAAATGTTTTATTTCTTGCTCCGAATATCTTGCATGTAGCG  
TGATTGGTAACTCTGTAGATGCTGTAATTGAAAAGTATGCAGGAACGCCATAAACTCTTATGAGAAAGAA  
ACCAAAAGCGAAAATAATCAATAGCCTCTACCAAGGGAAGGGCTGCAAAAACAGTGAATAAAGCTCAGCA  
ACAACAAAAAACGAGCTACCAAGCGTACACACCTTCTGCTGCTTTTAGCAGCGGTGATTGGTGCAGATC  
CTGTAGGGCGTCCCGAAGCCACTAAGAAGCTATGGAGTATATTAAGGAAAAGGATGTCAATCCCTTCA  
AAATAAAAATAATCATTATTCCTGATAGTAAAATTGCAGGGAGTGATAGGAGCTGATCCAAATCGACATGTT  
GCGCTATCTAAAATAATTAAGCGCGCACTTAATCAAGGAAGAGTAGGGGCAAAATCATGACTCGGAATAG  
AGGATATTCGAGAGAAGCTCCTCTTCTTCCGTGAGTTCTTCAAAGCCGTCAATCAGTTGATACACCTC  
TTGTGATGAAGACGCTTTAGCTAAGTTGGCTCGTAGAGAACGTACTTTAGGAGAAAAGATGAGGTAATGC  
CCACACAGTTTACGAGTATCTGTTAGTAGCTTCTCTTACAAAATAATACTCTTCTATCCATTGTAGAT  
GCTGTACGAACGCTTGTTTTCTTGTAGAAAAGATGGAGAGGAGTAGGTCCCTGTAGTTAGGTAATCTT  
TACAAAATTTTCGATCCAAGGAGCTCCATAGTACCTCGAGCAACGAGGACACCATCAATGCGTAGTC  
TCTAGCATCGTTCAAACGGCTTTCAGGGAGAAAACATCGCCATTCCAAATACTGGAAAATCATCACCAG  
CGCTTGTCAAATCTGAGAAATGAATTCGAAGTTGCTTGGCCCTTGATATCCCTGGGAGCGTGTCTTCC  
ATGTACAAAGACAGCACTGGCTCCGCCTTCTTTAATGATGCGGACAGTCTCTTCCACATTGATGTGGTGC  
AAATCCCATCCAGATCGAATCAAAACGGTTACCGAACGGAACGAAACCACTTCTACCATCTTCTCAACCACCT  
TCCCGATTAATTCAGGGTTTTAAAGCATGCCTGAACCGCTCCCATCTTTAGTAATGCGATCGGTGGGGCA  
TCCGCACTTAAGATCTATAAGATCAAATCCCTAAGCCTTCTAAAATTCAAACAGACTCTCCGGCAAGGTGC  
GGACGCTGCCACAGAGTTGTCCACCGATGGGACGCATAGATTCAGCGAAAATCGAGTAGGCGTAACGTGC  
GTTGAGGACAATAATGGAGGCTTCCATTTTTACCAATTTACAGAACATCAATGCGGGCCGATATTCAGC  
CGACATACGACGGTAAGGAAAATCAAAAATCTTGTAAAGGGGGCGTAGACTACGGGAGACTTAAGAGGA  
AGGTTTTTTATAAATATTGAAGGAGCCATGGTGATTGAAAATATTCAGAACAATGAAACGTACGATTTT  
TAGAATCATAAAGGGCAAACTCCGAGACAGAGGAGCGATCATAGGGCTGATGTCAATAAAACCTATA  
CGCGAACGAATTTATGGAAGATACGGAGATAGGGAGATACCCAGCGACGAATGATACGATACCACCTGTG  
TATTGTGGCATTCTGGCAGCCAGGAACAAGAACGTAAACCAAAATTAATAAATAATGTTTCTTGAAGA  
AGTTCTAAGTAAATAAGAAAGCAATTAATAAACTCTGTTATAATTAATTAATGTTTCTTGAAGA  
TGTTTATTATTTTAAATGAGCACTCTTCATTTTAAAGAATAAAGAAAACGCATAATGGATTTAAG  
CTGCCTATTTACTGCATAGGGTAACCCAAAGTGCAGAAAACGTTACCAGGATAGCAATTTTACAGAAA  
CCTGTAAAGGGTGGTCTCTGTGTCTGCTGCAAGCTTACCAGAACAGGCGGTTGTCTTGGCCAAAACG  
ATTTCTTTCTTCAAAGGTAGTTTATCCCTTACAAGGACAGGAGACTTTAGTAAAAGTGTGAGCTCTTCT  
TTAAAGAGCAAAAAGAAATTTTAAATAATGGTGTATGCGGAGCAAGAAGCAACCGCAGCATTTCCCTTGA  
AAGAATTTAGTGATTGCGCATGATTTAGGAGAGTGGAACTCGGCTCAGGAGCGCGTAGTAACACTATGGAT  
GTTACAAAGACAATCTGTTGCGTTAGCAACAGCTCTCTTGGAGGAGAAGGGGGGACAACTACGCACATTT  
CTTGTGCGAGCCAAAGATCTGTTTCTGCAATTGCAACAGTCTCTTCTTCCGAATCTAGAGACTTATTTT  
TCGTATACGAAGGTCTTGATGAGACAGTCTGTTTACAAATGCAAGAAGGCTCCGTATTACTGTCTCGTTC  
CTTTAAATAATGACTCTGAAAGCTTATTAGACGATTTATTTAGCTTCTCAAACATACGTTCAAGAAGTATAC  
ACCGCTCTTTATCAGAGATCCACGGCGCTTATCTATCTAGTTCTGTTACGTACCAAATGAGCCGTCGGG  
CTGGCGTTCCTGTGATCATCAGTCTTTTATTTCTCGAGCTCTCTCCAGACCAAGAAGTGTATCGTGATGC  
GGTGGCTGCCCGTTCTCAGGGAGTGGTAGCTGCCATACTTGTTCTCTTACAGTTGGGGAGATTTCTCT  
CGGAAGGCATGTAGCTATTGGATTAATAAAGGTTGTGGAGCCCTTCTAAACTCGCTCAAACGAGCGCG  
TGGCTATATTCATAGGCGGGGAGTAGAGTCACTTATTTAGTCCAATAAGCACAACAGATAATTTAGAGA  
GATCGTCTCTGAAAAGGAAATAACCGTGCTTTCTGGTCCGACAGCAGGTAGTGAAGAAGTCTGTGAT

TCGGACCACAGTTGGGAATATGAATACCTCCCTACGGTACCCACGAATCAAGAAGTGATGGAAGTGCTTG  
GACGAATGACTGC GAATCTCCCTTCCGTTTCATTC TCCCATTA CAAATA TAAA TTAGAAGATATTCCTTC  
CGAGGAGCGTCC TTTAGGGGGATATCGGGCTTATA TTTCTTACAAGGTGCAGCTAATGATGAAGAC CAA  
ACATCT TTTATAGATCAGTTATCAGCTT GGATCGGTGCGCGTGTTC TTTCTAAA AAGCTGGCAGATCGCC  
AACAAAATGTAC GAATCGCTCTGCAAGGGAGG GGAT AATGCGACGCTTAGGAGT ATGGGTGCTGTACTA  
TTAGC GAGTGGGGCTGCTTCTCTTCC TGAATAGGAGCATGGTGTGGCGTCAGCGTACAGCAGAGGCTT  
GGGAAAATTTACTC ATCGATATGAGAGAT TTTCAGTC TAAA CGAGAGCGATCTTCTCAGGTAGCAATCAA  
GAATGCGCGGCT GAAA GCAGCGCA TAAA CAAGC GAGTTTCCCAATT GGAT TGCCCAAGGAGAGA GAAT CTC  
GT TTTCTT GAATAAGGAGCGAGATGCTCTAGC TAAA CTTCCTGCAACAGCCT GGGT GGTGAGAAGTCGTG  
CAGTCAAGGATCGGAAGGC TTTCTTAGAAGATAACCGCTTGTTCATGGCAGGAGCAGAC TTTA GGAGA GAA  
AAGCACGTTGT TTTCTTTCCAAAAGAGCTCCAAATAGATGACGAGGACATTC CTGTATTATTAGGAT TG  
CAAAATCC TAAGTAT ACCCAAAT ACCATTGTT TTTCTTTCTTACTGG GAAA TGACGAAGCAGGTGTCAT  
CATTAG GAAATGAGGTGT GGGT CGTTCACGCGGAGGCTTGGGGACGATGTGTGTAAGTAGAAGCTTAAGA  
TGGTG TTTATGT TTTCTCAAACGTGTC GGATGGGT GGACGCTG GGG TTTATGATAAGCTCCGACTGACAG  
GCATTAACATTATCGATAGGAATGGTC TTTCTGAGACGATCTGTTC TAAAGAAA AATTACAAAAGTATAC  
GAAAATCGATTTTCTCTCTCCTCAGCCTTACCAAAAGTTCATGCGTACATACAAAACGCAGCAGGC GAG  
TCGGTTGCTTG TTTAACGACGTACT ATCCGAAT GGCCAAATCC GACAATATCTC GAGTGT TTTAAA TAATC  
GTGCT CAAA GACGTTATCGT GAGT GGCATAGTAATGGCAAATTC ATATCCAGGCAGAAGTTATTGGAGG  
GATAGCAGACAAA CATCC TTCCGCAGAAGCCGGATGGTTGTTTCGATGGAACAACGTATGCACATGATAGC  
GAGGGGCGGTTAGAAGCTGTTATTCATTAT GAAA AAGGCTTGCTGGAAGGGATTTCTGCTGATTACCACG  
CGAATGGGAATGTATGGAAGGAATGTCCTTACCA TAAA GGTGTTGCTCATGGAGACTT CAAA GTCTTCAC  
CGAAGAAGGAAG CAAA TAAAGAAA CAACTT CAAATAAAGGGCAGTTGTCT GGAT GTGCATTACGCTAC  
GAGCCAGTTACAGTCATTGTTGT CAGAAGAA GAATA TAAA CAAGG GAAA CTGCGCAGTGG TAAA TATT  
ACGATCC TCTTACTAAGGAAGAAA TCGCGTGCCTAGT GAATGGCAAAGG TAAA CAAGTAATTTATGG GAA  
ATATGCGATTATAGAG ACCCGACAGATTGTACATGGCGTTCCTCACGGGGAAGTCTTGTTACAAAATGAA  
CATGG TAAA TCTCTGTTGCAAGCAT ATTC TCTAATCAATGGGCAGAAA GAGGGAGAAGAAGTATT TTTCT  
ATCCAGGCGGAGAAGGTAGAAA AATGTTATTAACATGGTCCCAAGGCATTC TACAAGGAGCTGT GAAAAC  
TTGGT ACCCAAATGGCGC CAAAGAAA GTAGCAAAGAACTTGTGCAAAA TAAA AAGACTGGGATTC TCATG  
CTATACT ATCCCGAAGGACAAGTGATGGCTACCGAG GAATATGTAGACGATCTTCTCA TAAAAGGAGAAT  
ATTTCCG GCCGAACGACCGATATCCATATGC TAAA GTG GAAA AAGTTC TGGGACAGCGGTCTT TTTCCAG  
TGCTACAGGAGGAT TGT TAAAGAAA GTCCCTATGAAGATGGGAAGCCTGTT ATTCATTAGACAT GAAA  
ATATTGTAGAGCA GAAA CGTTG CAAA CGACGAGAA GGGTTAGCGAAGCGGAGCAGC TTTCTGTCCAGCG  
CAGAGATGAAGCAGCTCGTGAGCTGATGCAT CAAA TTATGCAGACA ATTC CGCAAGGC CAAA TGTATCC  
TAT ATTCCT TTTCTGCTCAGAGTTGGAT GTTCGAG GGAT CAATGCATGGTTAGCGCAAGAGAACC GACTCC  
TCCTACC TAAAATGCAAGGGATGGATATCGTTCCGATAGCTCTTCT TTTA CCAAGATAGAGAGT CTGTA  
TTCTCC TAAAGA CAAA AATCAGATAGAAGGAGAAGAGATCGAGGCACAACAGATTGCAGCGGCCCTTGATT  
CTGCGATAGTC CAAA ATCAGAACAAG TTTCTGTTA GGATATGGCGGAGGCTACTACGATCGTTT CAAA  
CTAAGT ATCCGTATA CAAA GACAATAGGCGTGGATTTAAA GAGCAGCTGTTGGCGTATCTTCCAAGGGA  
AGAGCATGATGTTCCCTTAGATCAGTTATATCTCACT TAAA GAGCTGT TTTA CGTA TAAAAGCTCCCTC  
CTCT TTTCTGCATCTGC ATTC TTTT CAAAAA AAGAGGCCTC TTTCTTGT ACTC AAGAATAGAGAGAA  
ACCTCCATTC TAGA TAAAAAAGAGTGTAGTTTT CAAAAATTC TAGCACTTGACTGTTGTC CAAAAAT  
ATTGCAAAC TGACGCCAC GAAA TATAAGAGGTGCAGATGGCAACCTCT TAAA GTA GAGTCTTCTAGACA  
GCGCAACAAGG GAGT ATACATGAGCGTTCCCGACC GAAA AAGGGC CAAA GAAGCGGCCATTGCTTATATC  
GAAA AGCAA CAAA GCGCAGGATCTATCAT GAGTTTAG GAAA GCATTC TT CAGCTCATGAGATATCAACTA  
TTAAA ACAGGTGCATTTGCGTT GGATTTAGCCTTAG GAATAGGCGGGGTTC TAAA GGAAGAAT TG TAGA  
GAT TTTCTGGGCCA GAGTCTTCAGG GAAA ACAACTC TAGCGACGCATATAGTGGCCAATGCTCAAAAAGATG  
GGAG GGGTGGCGGCTTATATTGATGCCGAGCATGCC TTAG ACCCGAAT TATGCTGCGCTTATTGGAGCAA  
ATATTAATGATTTA ATGA TTTCTCAGCCTGACTGCGGAGAAGATGC CAAAAGTATTGCAGAGCTCTTAGC  
GCGTTCGGAGCTGTCGATGTGATTGTGATTG ACTC GGTAGCAGCATTAGTTCCAAAGAGC GAGT TAGAA  
GGG GAAA TTGGAGATGTCCATGTTGG CAAA CAAGCTCGCATGATGTCGAGGCTCTACGCAAATTAAC TG  
CAACCTTAGCACGAACCAATACTTGTGCCAT TTTCTATTAACCAGATTCGGGAGAAA ATAGGTGT GAGTCA  
AA GTAATCCAGAGACTACGACTGGAGGACGTGCACTGAAGT TTTA TTC TTCCGATTC GTATCGATATTCGT  
CGTATTGGCTCCA TAAA GGGAGGAGAAA ACTTCGATATAGG GAATCGTATCAAGGT GAAA GTAGCAAAA

ATAAA TTAGCTCCTCC ATTC CGAACTGCAGAA CAAA ATATCTTG TTTAATGAAG GGAT TTC TTCCGCAGG  
GTGTATCATTGATCTCGCTGTC GAAA AAAATATTATCGATAA GAAA GGATCGTGGTTCAACTACCA GGAT  
CGTAAGTTAGGCCAAGGTCGAGAGGCGGTTTCGAGAAGAGCT GAAA AGGAATAAG GAGT TGTTCACGAGT  
TGAACGCCGTA TTTAT GAGT CTGTACAGGCTTCACAAGCTCCAGCGGCAGCTTGCCT GGATTCAGAGTC  
TCGCGAGGTAGCAGAGGCTGC GAAA TAGA GGGT GTATTC CCTATCG ATTC TAATCAAG GAAA AGAAGTT  
TTC TTCT TTCCTTGGTAG TTCCT TTCCTCCCCGTC CAAA TTGTGGTTCTCTACATAGG CAAA GTAATT  
CCCGAAGCTGTAGAGCCAAT TTCATAATT TTC CAAAAAAGGC TAAA ATTT CAAA GTG TAAA CTC CACG  
GATC CAAA GTGTGCGACTTC TTTA TAGTGTGAGGTTAGATAAAA AGAGACTTCAAA GAGT AAGGCACCTA  
GAGATCAAGCAT TTTA ACAGCGAGAAGGC CAAA TGGTTCGCGT TTC TTGTTAGTGGTT TTC TCC TTT  
CTTG TTC TCTGCAGGCGAAGATCATATGTATTT TTC TTCGAGAGACG ATTC TCCATCGCATTATGA  
TCATACACATCGAACTGTTGCAAGATTAAGAGAGGGAAGTACCTTGT CAGAAGGTC TTC CATGGAACAA  
GAGCAGATGTA TTTA CTGTGTTGTCAG GGGT TCTCGTTACAA ATTC AAA GAAA G TTC AAGAAT CAAA G  
AAA TTT TTC TCGCATTGATAAAA GAAA AACTTCTGCACCT CAAA T CAAA CAGCGT GAGT TGT TAGAAGG  
GCGGATTC TCAATGCCATTTT TTTAAA TAACC TTC ATTAATGGCA GAAT GTATTGCG GAAT TAGAAA GG  
GTATCTGGATCAGAAGCTCATCT TTTAT TTT TTTAAA GCGTTACATGCACATCGTACCAAACAATATAATC  
TTGCGGTGGATGTGTT ATCCCGGTGG CAAAGGCATGTAGATCAGACTAAGCCTC CAAATTTA GATACGAA  
TGCTATGAGCTAT TTC TCCTTATGT TTTA GAAGAGATAGCAGCT GAAAGCCTGATAGGTGCCAGAAGG  
TATGCGGAAGGGC GAAT CGTTATTAACAGTAT TTC AACAAAATCT TTC TAGA GAAT ATGCTTGGTCTG  
TAGACATGTATAACCGTTGGTATTAATGCTAGGACAGAGCTACCTTCTGGAAT TACAAGAGG GGGT GCG  
TAGCGA TTTA CTTCG GAGTATTAT GAAACGATTC TTT TTTA TCAGAAGCAAAT GAAAGGT CAAAATGCG  
GGAGCATACAAACCTT TTC CCA GAAAGCATGCTGTTTCTACGATCATGCAGCATATT CAAA TCATAC  
CAGAAA CGCAGCTCCC CAAATTCATGGATGCGTTGTTAATGTGG GAAA ATAGCTATGTCC ATCCGGACTA  
TTC TTTAGTCTTAGAAA GGATGAAA CCGCTGT TTTA CAAGATGGTATACATACGCAAAAAATCTGTCAG  
GCAATTGCCGATTC AAAAAATCAAAAAAT TAAA AGAAA AACTGATAGAGCTGTT CAGCGATGAACTCGTTT  
CAAA TG TTC TCAAG GAAA CACAGTGTGCGCTGACCAGTACTTAGCTCTGTT GAAA ACCTAGATCC TCG  
CTCTTCTTGGGGGCATAAGTTGTTAC TTC CGAGAAGGAGATTGT GAATATGG CAAA CGAGGATGATGCA  
CAATACTC GCGAT TAAA AGACTATCTACTGTTATGGGAGGAGCAAGATATCGCTGATGTGATCGGCAAC  
AGTTAGTGCATTATCTATTC TTCAGTGCCAAGCA TTTA TGAGAGAGGAGGCCAGGAGGAAGCCTGCC TACG  
CCTCT TAAAGGAAA TCC TATTAT TTC TCAGAAT GAGAAGCCTGTCTTAATCGCACGCTTCGTCGGTT  
AAGCATT TTTA ACCCAGGCT TTTA GCTATGCGGAA TTCACGCA TTTAGTGTGGATAGAGAATTT TTTAG  
ATGAGGTC GGAT TGCCCAAGACTC TAGCTAGCGATGCC GAAA TTGC GAATGT TTTA GCAGATGCGCAATA  
TCTTT TTCCTAAA GCGGATTATCGTCTCTGTATTGTATAGTTCTTGGCTGGCGCGTGTGGCTCCTTCA  
ACAGAAGCCTTGCAACTACTT GGGT TAAGCTTAGTAGAGCAAAAA GAAT ACACGGAAGC CAAA GAAGTAT  
TTC AAAAGCTTCC TTTA GGGGAGGAT GCTTGG AATTC CCAAGTACACAAAGCTTCTCT CAAA TGCTA TAA  
ATACATAGCAGCAGCAAAAA GAAA AATC TTC CCGT GAATGTAAA TCAGCACGTTCAAGATATTGTAC  
CATC CAAA TTAGCACACATATTC TTCCTCCCT CAAA ATATAGCT CAAA CTCAAAGCA TTTA TCC CAGGA  
AGAG TTTAGTCAGGAAGCAGAAGC TTCCTTAGCTACAGC ATCC GCATTATTGCGTTGTGGTT ATCC TTAT  
T TTC TA CAAA TGATGAGACGATTCATCC CACGCTCCAGGGAT TTC AAATAAA CAACTCTTCCAATGGT  
TCCAGCTGTTGTC ATCC CGCA TAAA AGAAGAACTG CAAA AAGTTGTTAATCATAAA ATTTA TCTACGCTC  
ATTA TTCCT TTTA CGGGAGAAGGTG TTCATAAAA TTGCATAGATTGGCGGGAGCCGTTCCACGTACACC T  
TTAATT CAAAAGAGATTGCTCTGCTCTCAGAAGAGCAGAACCAGGTA CT GAAA ACTGTAT TAAA TTC TT  
GCTTCTCTCTCG CAAA TGGAGGACCAGGAACAGGCAAAACATT TTTA GCTGTT CAGATG ATTC GGTGAT  
ACTTGGCAAATTC CTCAGCGCAGATCATGGTAGCTTCTCCAACGGG GAAA GCTTCCGCTCATCTGCAT  
AGCGTATTAACGTCTCAGG GAAT CGTTGGAGATTC TGTAGAAGTCGTTACGATTCATAAATT TTTAAAAG  
ATATGCGTAGAGGGCGCTCCCCTGTAGATCTACTATTGGTTGATGAAGGCTCGATGGTGACCAT GAAT CT  
GTTACATGGACTGAT TAAA ACCATACGAGGA GAATCC CGAGGG GAAA CGATCTACGCAGATAGAAT GGTG  
ATT CAAAGGGATGC GAAT CAGC TTC TCCAATAGGTATTGGAGTGG GAAATCC TTC CATGAAGTAGTGT  
CTGAGT TTTCTAAA CAGGCATGCTT TTTATCTACCAGCCACCGAGC TAAA CATAAG GAATTACAG GAAT  
AGCGAGCGCTGTTCTGCGCAAGGAGCTG ATTCCT TTC AACCC CAAA CCTTCCC GACAAGAAGCT ATTCGG  
CGATTGTCT CAAA CT TTTACACAAGCAGCAAAAGAAG GGGTGTGCTTATGTGC CAAA ACTCCGATGCGCC  
AAGGAC CAAAGGGT TT CAAA CAGTT GAAT CGGTTGTTG TTTAATGAGATGCAGGA GAAA CATCCACGGC  
ACCTATTC CTATCATCGTGACA GAAA GATAT GAAA CGTGGGGAT TAAC GAATGGAGATACAGGAGT TTTA  
GATCC TGTAAACGGAACAATTGCG TTCAT GAATGGGAGATTC TGCATCAAGCAGAT TTCCTTATT



CTTACAAC TATGTCATGTCTGTGCACAAAAGTCA GGGTAGTGAATATGATCGTGTGATTGTTATTC TTCC  
TAAA GGCAGTGAAGTC CAAAATTC GGCAATTC TCTATACTGCAATTACAAGAACCAAACAACACGTTGAG  
ACAAA GGCTGATCGAGAAGCTTTA GAGGCGATCAT CAAAAAAGAGGGCGTTATTAATTAGAGCTGGCAC  
ACTT CAAACTCCTAG TAAAAGATGAATGATTCAGAAA GAAGGAGCGGACGTTATGGACCAGTTATCACAG  
ATACATCAAGAGCTAGCTCG TTTA GAA TTTA TCAATGATCAACTGCAGTCG GAAA GAGCGTAC ATCCATG  
A TTTA TTGTGTGCGATAGGC TTTT CTGAA GGGT TAAA GACGATAGCCGCGATAGCTAACGAAGTGC TTTT  
CGAAGAAG ATTC CCAAGGTTAACTGGGC TTTA ACAT ATCCCGCAGTATCTTTT TTTT GG TTTT TATTATT  
AAGACCTGGGCGTTGTGCCAGGTCTTGT GAAA AACGGGACGGCATTAA GAAT TAGGA GAAA GAGT CTCC  
TAGATAGTGTGACGTACCATA GGA CAAA CGATCATCTGAGCAGACG ATCC TTCAAAGAAGAT TTTT CCG  
TCAATGATAAGGTAACAACGATCTGCGATAGATAA GAGT TCT CAAA CGTTATGGTCGGTAATTAAGATAC  
CAATACCGGACTTGCCA GAAT CAAA ATTAGGTA CAAA ACAT CAAA AAT GACCAGA GGATCC ACGTTAGC  
AAAAGGCTCGTCTAG TAAA AGAACGCTA GGATTC AGAGCAAGAACACACGCGA TTTT CAATCGGCGACGT  
TCTCCGCCGATAGCGAGCCGGC TTTT TTATGTAGACTAGTAGTCAATTGAAGATCATCAATGAGAGCAT  
TTA ATAGGTGCG CAAA TTCT TTTT GTGT TTTA TAGATAA TTTT CAGAACGCAAATTAGGT TTTT TTTA AC  
AGTCAGCTC CAAAAA ATAGTAGGTTCTTGCGCTAGGT ATCC GATT CCGAGGCGCGCTCGATAGTCCATA  
GGTTTT CAAATAATATCTGTATT CAAA AACAGAAT TTTT CAGAAT CAGGAC GGAT CAACCC TACAG CAA  
AATAAAA AAGCTGTGGT TTTT CCCGCTCCGTTAGGGCCTAACAAACCC CACGA TTTT TCCTGCATTGACTTG  
AAAAGACACATCATTGGTCACAGG TTTT TTATTGTATTT CAAA ATGAGGTTGCAAAC GGATAGTACTGAC  
ATAAAA AAGGAT TAGTT TTTA AGCAAAGAGAGAGAGGAC TTTT ATTCCGCCTTCAGCCATCCCTCTACC  
CA TTTT TGGTTCGGCATCTGGAGT GTTAATAGAGAAA CAACAATTATACACGCTCAAAGAATAATC CAAA  
TAATTAAGAAGTCTCCAGTACCTC TAAAAAACATAGCGCGTTCCGCGG TTTT AG CAAA TAGAC ATCC TG  
TTAGGTGCGATAA GAGT TCTCGACAGTG TAAA CTGTATTGGAGAAA TGTAAC TC CATA CAGGACTTATC  
TATGGTGAATAAAA ATAATTGCT TTTT TGGAGAGATG ATTC GCTTGGGACTCCAAGTTT CAAA AT TTTT  
AAAAATGGCGGAGCTGGTGTACG GAGT CTTGGTGTACAAGCGTG GGATTGGT TAAA ATCTCCCAT CAAA  
CAACCGCTAATGCAGTTACGCAAGCACATAATAT TAAA ACTACCACACACCAGATGCCAT GAAAAA GAAA  
CTTCGTCATACAGAAA CAGCATCCA TTTT TTGAAT GTAGGT GAAA AGCTGTACCC AAGCAGGAAGCAATC  
GTTT TAAA TCTTTT AAG GAAA GCATAGAAGCAGCATCACT TAAA GC GGATGATGGGTTC GGATGGG TTTT  
TAT GAATAATCC TTGTACGCCAGCGCTATAGCAGAAC GAGT TAGGACAGGGATAAA TTCCGTCTGGCCA  
CCAC CAAA GCTATGTAGTGTCCCGTAGTTGTACG GAATGAGT TCCATCGAAGACAACAGGGAACCC AA  
AGCGACGAAGAACTTCGATAGAACGCATATCAGAAA CAAGATTGTTGT ACCAAAAGAACAACCGCGCTC  
TGTTAAGATGAT CAAA TTAT TTTT CTGTGGACAGTAC CAAATCAATAGGGCCTTGCA TTTT CCAAGGAGAA  
AGGAAT TGGCCTTT CAAA ATATTAACGATCGCTTGC TTTT CCCAGCAGTCACCAGAAGATCTG CAAA AC  
GACA TAAA AAAGCTGGGACTT GAAT AATATCACACAC TTTA GCAGCTCCCGTTCATCTGGAGAATG  
CACGTCGTAAAGA TTTT AACATCTAGCTCTTC TTTA AT TTTT GCCAGTG CAAA CAACCCGAGTCTGAGT  
CCGGGCTCGATAATTGTGTAC GGAT GAACGATTGGC TTTA TCGTAACTGCT TTTA AAAAATCCAATGAA  
CAGAAGAAGCATAACGGAGCAACAA TTTT TTTA ATCGTCGCGCTG TTTT CAAA ACAGAGTTGTCTTCAAT  
TACACAAGGGCCTGCTATCAAGAGCAT CAAA TTTT CG GAAA CA TAAA AAGGGTATCC TTTT TTA GAGTGG  
AAT TGGCC TTTA GTCAGAGT TCTTAACGATCTTCTCAGCTGACAGAAA CAAA ACTATACACCA CAAA CG  
CAAA AT TGGTACGA GAAA CCTTG TAAA ATCC TAGGAAGAGGGCTTT TTTA AAA GAG GAAA TAGT GAATCCA  
AG GAATGGGT TATGGCAAGGATTC GCGGAT TAGCAG CAAA AACAAGCATCTCAAG GAATAGAAGAAGG  
AAGAGT GCTTCCA GAAA ATCGAAGTCTAAGGTATAGTATCTTCCAGCACTATGG GAGT G TTTT CTGTCTG  
TGGACCGATAGCTCAGT GGAT AGAGC ATCC GCCTTCTAAGC GGAT GGTGCGAGGTTT GAATCC TGCTCGG  
TCCGAGACACATGCTT TTTT TTTT AGAT TTTA TCTCC TTTT TCTCGT GAAA AATACT CAAA ACTC AAG  
TAAA ATACAGAAA AATC CAAA ATATGGGG GAGT CTCTTGTATGGACACGCAATTC ATAGCGAGT CCGTCT  
GTTT GAAA CCAAGAAGTTACTTCTG TTTT CAGGCAAAG TAAA AGAA GAGT TGATGTCCCCATCAAATATGA  
CT CAAA AAGGGCCAGTTCTGTT TTTA GACCAGTTGCGGCAAGCTCTTATCGAAAAATGGGAGAACA GAA  
AGGGCAGGAGATGTACGCCG TTTT ATACAGTC TTTA CTGA TTTT CAC ATTC ACAACGGTTCA TAAAGAA  
ATGGAT CGAGCACAACGCGCTTCAA GAAA ATGCGTTCCGTATACAGAGATTGATG GAAATTC GCTACTT  
CTTAGCACG ACCC CTCTCGAAGAAGAGGTGTGCAGGCTTGCTAATAACAGGAAGAACTTCTTG CAAA AT  
GCCGAGAAA TA CAAA ATTC CGA CAAA TTACAAACAACTA TTTA TTTA GCCAAACC TTTA AGCAGAT TTTT  
CTATGACTCAGGAGG CAAA GGAGT TGCATGTGCAACATGTGATAAG TTTA ATT GAAA CAGCAGTTCGGGAT  
TC TTACAGATCATGCCCGAT TTTA CTAGCCTGTGAAGCCCGCAGGTGGTTCTTCTC GAAA G TTTA GAT  
AGT CAAA TTAACA TTTT TTAACGGTTCGGAAGGTT GAA TAAA ATCT TTTT CGAACCGTATCATAGAAGG

TTTC AAAAGACGAAGTCCTGT TTTA AGGAGGCTTG ATTCTG GAAA TCCCTGCTCCAACGGCTGTTT TTTC  
ACAAA TAATTGATGAACAATTAACAGGACGCCTTGATAAGGGCTGGTCTCATATAATGGAGCGT ATTCA  
CGAGCTT TTTA TCAGCAACAAATT GAGT TAGGGCGTGTCCGTGTTAATGGGC GGGTGTATACGCGTG TTT  
CCC ATCCGTTATCC CTAGG GGAT GTGGTAGAAGTG GAAT TGATAGAAGAGGAAGA ACCCTCTTC TTTAAT  
CCCGGAAGATATTC CTCT GGAT AAGGTATATGAAGACGATATGAT CAAA GTCATTA TAAA CCAAGAGAT  
ATGGTTGTCCATCC TGCTCCTGGGCATACGCAAGGTACGGTGGTGCATGC TTTA TTACAT GAAA TCGGAG  
AGCGTCT GAAA CAA GAGT TCCCCGAGGAGCCATGGCGCCAG GGAT TGTACATCGCTTAGATAAAA GATAC  
TTCCGGCTTATTGATTACGG TAAA AACTC GGCGAGCTAAGGCTC TTTA TAGTGAGCTT CAAA CTACCAA  
CAGG TAAA AAAGC TTTA CGTAGCCA CAAA CATTAATGCTCCGTCTCAGGAACCT ATTCA TACTCGGAT AA  
CGCGTC ATCCCT TAAA AC GAAA GAAA TGACTGTGC TTTCTACACATGCTGAAGGCGGTAAGGAAGCCAT  
T ACCC ATTGT CATGTTCTAGCTAC GAAT GGACGATTAAGTGTGGTTGCTCTAT ACCC A GAAA CAGGCAGA  
ACC ACCAGCTTCGTGTACATATGAAGCACCTGGGCACACCG ATTCTCGGAGATCCCG TTTACGGGATCC  
CCTCTA TAAAT TTTC GTTATGGTCTTGACAAAACA AATTGCATGCC TATAGCTTGGTT CAAA CTCATCC  
GGAGAGT GCGGAGC GAGT GAAGCTAGTGACAAAGCTTCCAGACGATATGACTTCC TTAATAGAAAAGGAA  
TTTA GAGAAGGTGCTCTATACT GGAT GGTTCTGTGATTGG TTTAAA ATCACTAGGTAGT CAAA TTTT  
TAAGTAAGAAGTATAAAA ATTAGATTA TAAATACTATT TTTA TT TTTC TTTC ACACCTTCAGAAA AAGCT  
TGTGTA GGACAAA CTTCGCAT GAAA GAGT TTTA GCGTACATTG TAAAAAATCTTGTGATAAGCCAGAG  
GAAGTGCATCT GAAA GAGGTGCAGGGAACCAATACGATTATCTAC GAAT TGACTGTTGCTAAGGGAGATA  
TCGG TAAA ATTATCGG TAAA GAAGGACGCACTATTAAGGCT ATCC GTAC TTTA TTGG TTTC CGTAGCAAG  
TCGAGATAATGT GAAA GTCAGCCTA GAAA TTATGGAAGAGCGG TAAA CGTATACG TTTACAGCTT CAAA  
GT CATTGTTAGAGAAA GTCTTAGCGCGGTAT TTTC TAACACCGTT TTTC TTCTCGAGAAGACTGTAGTC  
TT CAAA GCCCGAGAG TTTA AGGAT CTCAAGGGCC GAGT CACGT TTTA GAAGTTCTCTTCTTGATCGAGCG  
CAGCGAGTTCT CAAA TTTC TTATGAGCGGAG ACTCTCTCGGTAGGTAGGT CATCAAT CAAA CAATT CA  
AATC TTTC GATGCCC GAGTTGTCTGTAGG TTTC GAGCAGCTTCTTGATGTAGAGA ACTGTGTATTT TTTC  
AGTTGGCTCAGATCTT CAAATACGCTACTGCG TTTC TTTC TAAGCATGCCAGCTCCTTCTCGTAG GAAT  
TTTC ATCAAAACAGAGGAT TTTT TTTA ATAGTTAGAGCTGCTAGTTGAGCGGTTGCTTGCTTATCAGGAGC  
CGGGAGCGTGTCAAGAAA TGAGGT CAGAGCTTCCAAAACAGCGTTGT GAAT GGC ACTTGATGAAGGAGAC  
GTC TTTC TTTAGAAA GCATGGAGCGCACGGTATCG TAAAGCTTATG TTTA AT GAATAGATATTC TAAAG  
T CAAA TGGTACAGCTCGCGGCTTAAG GAAT CTCTAGTAT GAGT AATTCTTTT TTTA AGGTAAT CAAAGAG  
AGT CTGG CAAA TAAGCGTAGGAT TTTC GCTGATCGTTG TTTC CCAAGGT TTTC CCTGG TAAA TAGCTGTT  
GGCCGAGAGGTTAAGATAACCTGAC ATTCTGTATGTGTATATAGAGGGCGTAACAGATCT TTTA GCGT GGA  
TACC TTTA GGGAG CAAA ATCTCGATATGAGGGAGGTCCGTAGAGAAA TCTT GAAT CGAATCGAT TTTA AT  
GATTCCTCGT CAAA CTGCGT TTTC GATAGAAC GAAT TAGAGT CTCTGTAGTTGTGGAAGGACAGAT TTTC  
AAA ATTAGCAAGGT CAAA TCATTAATAATCAATTGTTGCGCGCAGAACAAT GGAT CCTAAGCCATCTT  
GGTAGTCGGAAGC ATCC ATCGTGCCTCCTGAAGGGAAGT CGGGAAGGAGA GAAA ACGGTTGGT CATT CAG  
TATAGCTA CAAA TGCTTCTAGTAGATCACAAAAGTTGTGAGG GAAA ATT CAAA TAGTC ATCC CTACTGCA  
ATGCC ATCC ACGCCATGAAG GAGT AGTAGAG GAAT C CAAA CAGCTAAGATATCAGGTTCTTGCTCTCTC  
CATCGTAAGAAT CATGGAAGGT CATGAG ATCC GTAT TAAAAAGTACCTC TTTA GC TAAA GGGCTTAGCCG  
CGCTCTATATAACGAGCCGCTGCATGAGGAT CTCTGTGAGA GGGT TACCAAAGTTCCCTTGTGTCTCT  
ATCAGGA ACCC TTTACAAA CAAAACGACAAGAGCTTCCACGATAGGCGCATCACCATGCGGGT GCAGCG  
CCATCGTACGTCTGCGATATTAGCCACCTTATGCAT TTTA CCATC ATCC ATACG GAATAAGGTCCAAG  
AAGCCTTC CAAA AACAGGCTTGAGGCCATC TAAA ACATGAG GGAT TGCACGTTCCAAAATGACGTAAGAC  
GCATACTGTGT GAAA TGAGT TTTAAA TAGGTCCGAGAGGTGCTCATAAGTTCCG TTTA TAGCTAGAGGTT  
GGTAAACAG ATTCTCAATAATAAAA TAGT TTTC TCTCT CAAA TGT TTTC CCTATGTA GAAT TG TAAA AGT  
GTGTCGAG GGGT TTTC TGTATCAGGAAGA GAAA CTG GAGT TAAGCGCATGTCTGCGCCGA TAAA AGA CAAA  
ATTC TTTA GGA GAAA TTCTCCTAAGCC CAAAAA C GAGT AAT TTTC AAGAGACG ATTCTTT TTTA CCGAT  
GTGTTCTATGGT CGA GAGT TTTC TTCTTCT GAGT AGCAATA GAAA GTGGC ATC CAAA TGCGGTAC TTTA  
AAAGAG GGGT TTTC TAGGATAAAA TAGGTGGTTGCTTGCAACAAGAGGAA GAAA GGTT TTTA GGA GAAA G  
TAATCATAAGATTAC GAAT ATGCATACCATCAAC ATCC GCATCTGTTGCTAAGATCACCTGGTTGTATCG  
AAGAT CAAA TAGAGAGT CAAA TGCAGGCCGAGGGCTGTAGCAAGG TAAAAAGTTTCGT CATT TTTA TAG  
ATGG TTTC TTC CAAA GAGGAAA AGACGTT CATAGG TTTC CCTCTCAAAGAGAACACTGCTTGTGTGAGCG  
GAT TTTC GCGAAGCTA GAAT CGAAGCGGAAGCCGATTCTCTTCAGTAAT GAAA ATAGAG GAAT TTTA CC  
ATACAGA GAAT TGTCTGTGAGAT GAAATTTA CAATCC CGAAG TTTA GGGAT TTTA TAGTGGAGT TTTT CA

AATTTA TC CAAA AGCTCTTGCTTGA GAAATTGCGC ATTCTTCC GAGTTT TTTC GTT GAG CAAA AT TTTCT  
CTT GGATCC GTTCCGCGCTGGAAGGATTCTT TTTC AAAGAAGAGACACAGCTTCT TTACCGCG CAAAGC  
TAACTC TGC GC GGATATTC GTATTC CCTAG TTTA TT CAAAG CAAA GGATTC AAAAA TAGGAGAAGCAAT T  
TTA ATGGCGATACAGCCAGCAAGTCCCTCAC GAAT ATCTTGAGAG GAAAAGTTT TTTC CAAAAA ACTCAT  
TAACGCCCTTGACTAT ACCCTC TT TAAA GGCAACGAGAT GGGT TCCGCCATCAGTTG TTTC TTGGCCATT  
TA CAAAG GAAA AATAT TGTTCGGAAGACG TTTC TGTATGGGAGAAA GAAA TCGGAGATCG GAGTATT GA  
AACGTAATAGGG GAAT ACAGAAGAG GGG CAAA CACTTCTTCTTCAAAAAGATCAAGAAGACCAC GAGTGG  
AAA CAATACGTTCTCCGTTATAAAA TAATTGTCAGTCCG GGAT GGAGATAGGTGTATTGACGGAT TTTC TT  
T TTTAGAAA CTC CACTTG GAAAGAAA AATTC TC GAAT AGTTTCATGATCGGGAGAGAAA ACGACTTCTGTA  
CCGTCG GGAT CTT GGGT AGCGCCCTGTTCTGTGTGTAAGA GAAT GCC CAAA GAGAAA GAAGC CAAA AGGA  
ATTT CAAA TTCCGCACAGAACGTACAGA GAAA TGTTCGATAAGGCATTAACGGC TTTCAGTCCCACGCC  
A TTTAATCCAACA GAAA AATG GAAA ACATCCT GAGT GTA TTTC GCGCCAGTATTGAT TTTAGAAA CACAA  
TCAATCACCTTCCCCAAGGGAAT GCCGCGCCTTCATCAC GAAT AGACAGTTCTGTGTGCGTCTCCTGTTA  
TGT GGAT GGTATGTC CAT ATCC CATGACAAATTC ATCAATAGCATTATCGACTACTTC TTTAAA TAACGT  
G TAAA TGCCGTCTTCAGCTTGAGATCC GTCGCTAATCTTCCAATATAC ATTC CCGCGCGTAGGC GGATA  
TGATCC AAGGAAGC TAAAGAAA TGATAGAAGATTC GAATACGCAGTTTTT TTTC GCATAAGAGT GTGTG  
GAAT AAGACAAAAG CAAAATTCGGGT TCTATAA TTTC TGAGAAA ACAATCAGCTAATAGTTATGCTCTCT  
TTAGAAA AATAATGTAAGGCGTAGTA TTTC TT TTA GTCTTCTGTCTACTAAGCAGTGTGAGCGGTGAGG  
ACTTGAGATACTAAGATTAAGCCGTG GAAACGCCTTT TTTAACGGTT TTTC TAT TTTC GTCTCCAGACTA  
CAAAAATTT TTTC AATGCAGAGAACGAAGAGAGT CTCAAAAATATTGGTATAAAA AATAC GAAA CAAAGAGA  
ATAAGCCAACCGAGAGAAGAAGCATAACAATCTT TTTCTTTAGAAA GG GAAT GATGAGAGGGAGCTTAAGG  
AG TAAA GAA GAAA CCGTGATGGTTAGGGAAGGGGAAGAACGTATAGGTAATA GAGT CAAA TTGGCGTTA  
TTGGCGT GAGT TATCGAGAGACTAC CAAA CAGCAACGAGAGCAAGTTCTTCATAT TTTACAACAAGCACA  
GGGGTCT TTTC GTCTGAAGTC TTTC AAGAAGAGAGGGACTATGT TTTATTGGCTACGTGCCATCGCGTC  
GAGT TGTATAGCGTCGCGCCAGCCGAGCTACAAAATTC ACTGGCACAG GAAATAAA GCTCTTAGGTGTCT  
CGCCTTATTT TTTA TC GAAATCAAGATTGC CAAA CACA TTTAT CAAA TGTAGCAGGC GGGT TAGATAGCTT  
AGTTC TTGGAGAGACGGAGATTC AAGGACAAGT GAAA CGTGCCTA TTTACAAGCTGCTAGAGAGCAAAG  
C TTTC TCAAACCTCCAT TTTC TC TTTC AAAAAAGCCCTTAAGGAAGG GAAA GTA TTTC GAGC GAAA GGAG  
GCGCGCCTTATGCAGCAATCACT ATCCCTATTC TCGT GGAT CAG GAGT TACGAAGACGTCAAATAGATAA  
GAAGGCCTC CAAA TTA TTTATAGGCTATTC TGAGATCAATCGTCTGTAGCTTATCA CAAA CGAAGGCAA  
GGAT TTTC TTGTATCACCT CAAA TTCTCGTCAGCAGCTGCCGACGTTATCTATGCGTCAGGTAGTAAGAG  
AGGAGCTATGTT TTTC AAGATCC TTATCGCGTCGTGTT TTTA GGTTC TTTAGAAT TGCAGTATGCTCTGCC  
AC ATTC C CAAA G GAAA GTATCTG GGATATCC CCGATC GGAT TGT CAAAAT CAAA CTGTTCCCTCGTGCT  
CTGCCTTCGCATACGGTATTC CCTCACCGGTACAT GGATATGGACCAAATCAGTGATTGGTTAAGAGAGC  
ATC GAAA GGAAGTGA ACTCAGCACATCTCGACAGCTTGAGAGAGGTTGCGTACCGTTATTGGA ACTCTCT  
AAA TCAAAGATTAGAACGGCATGACTGTGTAGGAGCGAACGCCTAGTTGGACTGTCTCT GGGT GTG CAAA  
CAAAGTACAGAGCAAACA GAAT GAAT CTCCTGTAAAGGCTATA GAAA ATAGCAAG GAAATGGAGAGCGA  
TCG TTTC TAT TAAA AGCCTTGAGACTCT TTTC TCTTCAGCTTAGTTCTAGAC TTTC TAAA CTGTGAAC T  
TTC AAGTTGATTTACAAA TGTATTAGAGGTACGTTGCCCTATTC AGCC TTTC ATTC GGAAGCTTGCAAT T  
TCTCTAATATGATG GAAT GCAAAGCCTTGATA GAAA GCAGGGGAGGG GGAT CTGTTAAGCTGCGCTTAAC  
CTAAGAACGAAGAGAGGGGAAGGCTTCTCTTGTGA TTTC TTGGAT ACATACT TTTC GCACA TAAA TGACTC  
CAAA ATGCAGTGGCAGATGTCCCTGCGTGTGTGCGATACGAGAGCTGCTCT GAATGAGTTGA CAAA TG C  
CGG GAAA ATGTGT CAAA GGAGATGTC TTTAGAAA TCAAAGAAC GAGT CGTTTCGTGCCGATTTT TTTC T  
AAA ATTC CAAA TGC TT TAAATT GAAA GGGAT GAAA GAGAAA ACA GAAA AGGCTCCACTATCGAGATGAG  
AAA TCGTT TTTC TT TTTAAGTAGGTATTGGCATA ACTCAGCATAAGATCAGCGGGGCC ATTC CAATAG  
CTAGGGAGG GAGTA TTTC GGACCC AGAGCTCTCAGTTAGAGATGAGCACGTGAACACATGTTG GAAA AAT  
TGA TAAA GAAT CAAA TGCCGTATATGG GAGTGGCTTCC GAAT TAGAATTC GATGCCGAT GGATCC TATGT  
GCTTCCGATTAGCAGCCTTGTGC GGAT GCGCGTTCGTCA GAAT GCTGATGAG GAAA TTATCATCAGTGCT  
TT CAAA GGAGAGATTC CCGCA TTTA TGGATATA GAAA AAGCATATGCTC GAAT GATGGAAGGCAA CAAAC  
AAA GCCAGGAGACTGGGGGAGCTGCC TTAGGGCTTGATAGTGATGGGCATGCAGTGTCTCGTACGGC GAGT  
CCCAGGAGAGGTGTCTCAAGAAGAT CAAA CAAGTTATATAGAGAGT GTCCT GAAT TATGCTGAAGCGTGG  
CTAGAAGA TTTA GGACT GAGTAAA ACGGAGCAG GAGT AAGGGATGGGT ATACGCTTAGTTATTGATAAA G  
GGCCCTTGTCTGGAAC TGTCTTAT TTTAGAAA ATGGGAC GAGT TGGTCTCTTGGCAGTGATG GAAA AGC

TAGTGATATTCTCCTGCAAGATGAAAAGCTTGCTCCCTCTCAGATTCGCATCACTTTAAAAGATGGCAG  
TATTA TTAGAAAA TTAGATGCTTCGAGGCCGG TTTC GTTGATGGAACAGTTATCACTGCCCTGT CA  
AAT TAAAAGATGGG TTTC CAAA TAATGGGAAGCTGCCAAGTCTCGTTT TTTAAA GGGGAAGAGGTAGA  
AGGAGATATAGAGT TATCGTTCCAGACAGAAGGTGGTAATGAGGGAGAGCCTGCAGCGCAAGGCTCTTCA  
AGCG TTTC GTCCGAAGCTCC TAAA AAGGAGACAG GAAA TCC AAGTCTTCCTTCGGAGACAAAGGCTTCTG  
GAGAAGTATCTAGTTCAGCAATAGC GAAA GAACAA GAGT TAGCGGCGTCCTT TTTA GCTTCTGTGAGAA  
GGAGCCTGGAACACCAAAGAAGTCTCTGAGCCAAAGGTCTCTTCAAGAAGGACAG ACTC CTCTGT  
ACAGGA GAAAAAA GGAT CTTGAGCTTCC CAAA GCAAGTCAAGAACAACC TAAA CAACTACTC CATCAG  
GCAGTGGTGAACCA ACCAATCTCAAAACGC GAGT ATGGAA GAAA ACAGAACATCGCCGATCAAAATCA  
GCAGCCACAGC TTTC TTCTGCTTCA GAAT CGGGT TCTCAAAGTCCC GAAAATCAGGAGCAACAACCTTCT  
CAAACGCCTCCCC ATCC CCG GAAA CTC CAGAGCCGT CAGGAGAACCTAATAGCGCTACGGAA GAAA ACT  
CGCCATCTCCAATGGA GAAA GCTTCCGTAACAGAAGAAGGCAGCTCAGGGAC GAGT GAAGAA GAAA AAGA  
GGGT GAAGAAGATACTGCT GAAA GCGCAGCAAATGAAGAGC TAAA GGCAGAGGCTTCTCAAGAAGAAGAG  
AAGAAA GAGGAAGA TAAA GGAGAGGTTCTTGCTCCC TTTAATGTTCA GGAT CT TTTC CGT CAAA ATCAAG  
GAAT CTTCCTGCTGAGATAGAAGATCTTGACACA GAAA CAAGTTGCGGTTGACAAA ACGCAACCATCAGG  
ATT CAAA TTGAAGGTTCTTGCTGGTGC GAAT ATCGGTGCTGAATTC CA CAAAGATAGTGG GAAA ACCTAT  
ATCGTAGGAAGTG ATCC GCAGGTTGCAGACATTGCTTAAAGTGATAT GAGTAT TTC GCGCCAACATGCGA  
AGATCATTATCGGCAATGATAAATTC AGT CAAA ATTGAAGATCT GGGT AGTAA GAAT GGCGTGATTGTTGA  
AGGGCGCAAGATTGAACATCAATCTACGCTCTCTGCCAATCAAGTTGTTGCTCTAGGAACAACGTTATTC  
TTACTTGTGCGACTATACTGCTCCTTCCGATACGGTAATGGCGACGA TTTC TTCTGAAGATTAT GGGT TAC  
AAA GTCGTCCGCAATCTCCTGAAGAGATTGCTGCCAGAGCTGCGGAAGAGGAAGAAGAGAAGAGAAAACG  
TGCTACGTTGCCAACAGGTGCT TTTA TATTAACCTTGTTTATTGGA GGGT TAGCTCTGCTC CAAA GAATA  
GGAACAACCTT CAAA TTCCATACGAAGGAAGTAG TTTC TATAGATCAAATCGA CAAA ATTC ATGATATTG  
AACATGTA ATTC AGCAG TTTC CAACTGTACGG TTTC CGTTCAATAAGAACAATGGACAGTTGTTCTTAAT  
TGGGCATGTAAGAAA TAGCATTGATAAGAGC GAGT TAC TTTA CAAAGT GGAT GCTCTCTCG CAAA TCAAG  
TCGGTAGATGATAACGTGATCGATGACGAGGCAGTATGGCAAGAGATGAAC ATTC CTCTGTCTAAG AATC  
CAGAA TTTAAA GGTATCAGCATGCAATCTCCAGAGCCGG GGAT T CAAA TAATCAGC GGGTATC TAAA GAC  
AGAAGAACAAGCAGCTTG CAAA GCTGATTATC TAAA TCTACAT TTTA ATTACC TTTC ACTATTGGATAAT  
AAGGTGATTATC GAAT CACAAGTCAT GAAA GCTCTTGCTGGACATCTTGTGCAATCAGGT CAAA CGAACG  
TTCATGTGTCTTCCCAATGGTGAAGCTGT CAAA ACAGGATATATCAATAA TAAA GATGCAGATAAAT  
CCGAACGTTGTGCAAGAAGTCAAGATATTGCAG GGATTC GTGCGGTGAAGAAT CAAATCGT CAAA CTG  
CCTGCAGAAGAAGGTGTTATTGATC TAAA TATGCGGT ATCC AGGCCGTTATCGGGT AACCGGTT TTTC AA  
AGTGCGG GGAT ATTAGTATTAATGTTGTAGTTAATGGCGTAT TTTA ACTC GAGCGGATAT TTTA GATGG  
AAT GACGGTAACAAGC ATTC AACCCGATTGTATCTT TTTA GAACGGGAGGGGT TAAA TATAAAA ATT GAG  
TACAA TAAA TAGGCAGTTCGAGG TTATTTAATTC TTCCAGGTAG GAATAAA TCTATG TTTA ATATG SAA  
AATTC GGCAGC TAAA GGAGAAA AAGCTGCTCGTCAGTTG CAAA ATCTTGAACAAGACATGCACGATGTAG  
CCAAAGCCCACGAAG TAAA TGTAATGTACA GAGT AAGGTGCAGACGCTGACATCTTCTCTTCGAGAAGG  
GGCT TTAAAAGAGT CT CAAA GAAA CAACAACATT ACTC GCG GGAT ATGTAGCTCTTCAAAGGTGCTA  
GGACGTATCAACCG TAAA ATGGTGAATG TAAA CGG TAAAAGAGA GGGT ATCTATGGCGAGCGGAAGTTG  
TTCGGCT TTAA TTTC AACCCAGATGCT GGAT GGCATG TAAA TACGTTCAGG GAGT ACAACAATATCTA  
ACAGAAT TAGAAA CATCC ACGCAAGGAAGTGTAGACCTAGGGACAATG TTAA CAAA CAATTC CGCATGC  
AAAT CAAA TCTCAATATATGGAGT CTGT ATCCAATATCTTGACTGCGGT GAAT ACT GAAATGATCACCAT  
GGCAAGAGCTGT TAAA GGAAGTTAA TAAA ATAAGAGAT GGGT CATGGCAGA CAAA GATGTA TTAAA GAA  
GAT CAAA CATTGTTG CAAA AAGCAG GAAT GGTTGCTATCAAACAAGG GGAT GAAGCAAGCGC TAAA GCGT  
TAT TTC AAGCATTACAAGTATT GGATCC TGAGCATAACAGCACAT GAGT TAGGAT CAGGATTGTTGC CAA  
ACATAAAA ATGGAGCTCACAAAAGCAGAAGT TTTA TTC CGTGCTATTGTT GAAA AAGATCCCGAGAAT TG  
AGT GCTAAGGCATT TTAT CACTC ACACCTTATGATGATCGTTCTTCAGCAAGGAAGTTC TTTC GAAGTGC  
GTAGAGA GAG CAAA GAGCGCTGCTTACAGTTAGCTGATCAGGTATTA GAAA GTTGTGAAGTAGAGT CTAC  
AAGAGC TTAGCTAAGTCTGTTCT GGAT TGGCATGAT GGAT TAGTTGC TAAA AGTGGTGGGCC TTAAA T  
TAGG GAAA GAGT GGGTATTC CATGATAGATCC TCTTAAGCTT TTTC CAAAT CAAA ATGGGGAT AAGGAG  
AGT GCTGCGGT GAA TAAA CCTTCAGCATCTCCTATGCCAGC GAAT TAAG TAAA AATGTTGCCTCATTCT  
C TTAGGGGGT GGAGGTGCTGCGTT GGATTC GACAGTGTCCACA GAAA AGCTATCGTTGATGGCTATGAT  
GCAGGATAAAAATTC GCAGTTGATCG ATCCT GAGT TGGAGGAAGCTCTGAACTC TGAA GAGT TACAAGAG

CAGATCCA CAAAT TAAA AAGTCG CAAATGGGATGCACAAACGCAGATGCAAATGCAAGATCCCGACAAGT  
TGGCCTCTGAGCATGTAGATGCTTTAGGAGTCATTGTTGATTTAATCAATGGGGATTTTC AAGCGATAGC  
TGAACATACACAACAGACGGTCAAGCAGGGTAAATGGTGACGAA GAAA AATCTGTACACGCAAGATAGTC  
GATTGGGTCTCTCAGGAGAA GAAAT CAAAAATCGTGC CAAATTTGTA TTTCTCCGATCGTAATGGA GAAA  
GAGAAA CATTAGCCGATTTTCT TAAA AGTTCAGTATGCCGTTCAAAGAGCTACACAACGCGCC GAGTTACA  
AAACCAGTATTC TAGGTGCCACGGT GAGTAGTG TAAA AACGATTATGACA ACCCAGTTAGGTAAACATGGA  
AGAGATAACGACC GAGTTTAATACGTCATGACG GAAT TGCCGGACGTGCAATTAACCGCAGTTGTGGGA  
CGTATTATCGAAGTTGTGCGGGATGTTAATCAAGGCTGTTGTTCCGGATGTTCTGTGTCGGTGAAGTGTGCT  
TGGT GAAACGTCACG GAGTGGAGCCTCTAGTTACAGAGGTAGTCGGT TTTA CGCA GAAT CAAA TCTTCC T  
TTC TCC TTTAGGGGAGT TGACAG GAGTGAGT CCTTCTTCGGAAGTGATGGCTACT GGAT TGCCATTGCAT  
ATCC GAGCAGGAGAA GGGT TATT GGGT CGTGTAT TAAA TGG TTTAG GAAATCC TATTGATACAGAGACAA  
AGGGACC TTTA GAGAAT GTCGATGCCA TTTATCC AATT TTTAAA GCTCCACC GGATCC GTTGCATCGAGC  
TAAA TTGCGTACGATCTTGTCTACAGGCGTGCCTGTATTGATG GGAT GCTCACTGTAGC TAAA GGGCAG  
AGAAT CGGAAT TCAA CAGGAGCCG GGGT TGGTAAGTCCTC TTTA TTGGGCATGATTGCTCGTAATGCTG  
AAGAAGCAGACATTAACGTAATTGC CAAA ATTGGAGAGCGGGACGAGAGGTTCCG CAGTTTATA GAAA  
TGACCTTGGTGAAGAGG GAAT GAAA CGTTCATTATTTGTTGCTCTACTTCTGATCAGTCGTCAGCTG  
CGACTC AATGCTGCCCTACGTAGGAAC TGCATAGCA GAATA TTTCCGAGATCAAGG TAAAACGGTTGTAT  
TGATGATGGACTCAGTAACACGT CAAA CGCGAGC TTTACGTGAAGTG GGGT TAGCGGCTGGAGAGCCTCC  
TGCTCGTGTGGGTACACGCCTTCTGTAT TTTCCAC CAAACC TAAA CTGTTA GAAA GAGCAGGAGCCTCT  
GAT TAAA GGAACGATTACAGCAT TTTA TACTGTGTTAGTGGCCGG GGAT GATATGAACGAGCCGGTAGCGG  
ACGAGGT GAAATCC AT TTTA GACGGGCATATTGTT TTTCC AATGCATTAGCGCAAGCATATCATTATCC  
AGCGATTGATGTGTTGGCTTCTATTAGCCGATTGCTGACAGCTATTGTTCTGAGGAACAACGTC GAATT  
ATTGGCGTGTAGAGAGGT TTTAGC TAAATA TAAA GCTAATGAGATGTTGATTCCGTATTGGG GAATATC  
GTCGAGGATCGGATCGTGAAGTCGA TTTCCGAATCGATCATATCGA TAAAT TAAA TCGATTCC T TAAA CA  
AGACATTCAT GAAA AAACAAATTATGAGGAAGCTGCTCAACAGTTGCGAGCAATATTC CGGTAAGTCTGG  
AAA ATAGTAGGAT TGTGTGGTTAGAT ATCC TTTA GAACCTGTCTTATCTATTAAGAAGGATCGTGTAGAC  
AGAGCAGAGAAGGTTGTTAAGGAGAAA CGCAGACT TTTAGAGT TAGAACAAGAGAAA TTGCGTGAACCG  
AATCGGAGCGTGA TAAA GTTAAGAAT CACTATATGCA GAAAATTC GCCAGCTCCGCGAGCAATTAGATGA  
CGGAACAACCAGCGATGCC ATTCT TAAAAT GAAA CGGTATATCAAAGTAGTTGCGATACAGC TTTCTGAA  
GAAGAA GAAAAGGTCAATAAGCAGAAA GAAAATGTGCTGGCAGCAGCAAAGGAGCTG GAAA GGGCTGAAG  
TAGAGCTGACCAAACGACG TAAA GAAGAAGAAA AAAC TCGACTGCA TAAAGAA GAATGGAT GAAA GAAGC  
TCT GAAA GAAGAGGCTCGCCAGGAA GAAA AAGAGCAAGATGAGATGGGGCAGTTGCTTCATCAATTACTT  
AAGCAAAAACAACGG GAAT CTGGGGAGA ACTAA TTTA TGGAAT TAAATAAAA ACTTCG GAATC CAAATTTA  
GTGCAAAGATTGATCATAATC ATCC ACGTACAGAGGCTCATGAGCCTAGAGATCAAAGAGAAGTCC GAGT  
GTTCTC TTTA GAAGGAAGATCTTCGACTAGACAAGA GAAAGCAGATC GGATGCCAGGAAGAACCTCGTCA  
CGACAAGAGTCTTC TAAA AGCTCTGAAGA GGGT GCTGTTTATGAGAGTACAGCAGGCGTCTCTTC TAAA G  
AAGAAGAAGAGAGCAAAGGAGAC GGATTC TTCACTGGTGGCAATCC TAC ATCC GGAATGGCATTAGTT GA  
AACTC CTATGGCTGTAGTGAGCGAAGCTATGATG GAAAC GAGTACGATGACGGTAAGTCAGGTAGATCTA  
CAATGGGTAGAGCAATTGGTAACATCTACTGTA GAATCCCTGTTAGTCGCCGATATCGATGGCAAGCAGT  
TAGTAGAAA TTGTATT GGATAATAGCAATACAGTACCTGCAGC TTTCTGTGGAGCTAACCTGACTC TGTT  
ACAAACAGGGGAA GAAATTTCCG TTTCTCT TTTCCGAAT CAAATAGACCAAGCTCAGCTTACAGAAGCTACA  
CAACTC GTACAGCA GAATCC TAAGCAGCTAGTCTCATTGGTG GAGTC CAAAAA GCTCGTCAGT TAAA TC  
TTACAGAGT TGGTTGTAGG GAAT GTAGCTGTTAG CAAA CCTACGATT GAAAAAATA GAAACTC CAAA CA  
TATGATTGCTGCAACT ATTCGGCATCATGACCAAGAAGGAGATCAAGAAGGCGAAGGTCGTCAAGATCAA  
CATCAAGGCCAGCATCAAGAGAA GAAA GTAGAAGAAGCTCATATATAAGGATATCC CATGGCAGTTGCAG  
CAGAGCCTAGTAGTAATTGGT TAAA AGCTAGAGAC GAGTTACTAAGTTC CAAA CAAGAACAGAAGGAAG  
AATGT TTTCTTTTC CTGTT TTTCCAAAGCAG GAGTGTGAGCAGAAA CTC AAAGA TAAA TTC CATATGGAA  
GAAGTGAAT TGTC ACAAAGTCTCGAGGGCTTCTGTCTGTTGCAGCTGCTGTACAG GAAT ATGGGGAGC  
GTAT CAAA CTCCAACCGTT TTTA GCAA ACCCC CAAA AATCTGGG GAAT TTTA CATAG TTTCTTCGGAAGA  
AGACAAA CAAGCTCTAATAGGAACGATT TTTAATGATAGTTCCCTTAGCTTCTTACTTCTAC GAAA AAGAT  
CG TTTA TTAGGAT TTTCA TTATTAT CAAA TTGCAGAGATCTGCAAGCTGCTTCAA GAAA GTCCTTGGATTC  
CTTCTATGTCTG TAAA AGTAACAGGAGATGTTGCTT TTTCTGCGCGTGC CAAA GAGGGAGAGTATCATGT  
GATCC AAGTCTCTTGTG TTTA GAT GGATCTTGTATACGGT TTTCTATCTTAGTGCTT GAAA CTACAGCG

CAGAGCGCCTGTAGATTCTTAGAAGA GAAAGATCAGGCT CAAA ATATGCAAAAAGTCGA CAAA CAAACCC  
CAATTACTCTCGCTGTAGAAGTAGGCT CAAATCAAA TTTCAGAAGAAGATTGGCACCAGGTTGTTCCCTGG  
TAGT TTTAT CAAA TTAGATGCTTGTCTGTATG ATCC AGATACAGGAGATGCTGGTGC TTTC TTGTCCATT  
CAACGGACCCGTTTT CAAAGTGGACGGTT TTTA GATAAGCAGTCG GGATCT TTTAAA ATTACAGGATGTC  
AAGAGATGCAACCAGAAGAGGCGCCTGAAGAACCTAGTGAAGGAGTCCGGCAACTC CAAA CCTTCGGC  
AACAAAAATCGTTGCTGAAGTAGCTCGCTATTCTC TTTC CGTTGGA GAATT CAAAAA CTAGGACCTGGC  
AGTGTATTGCAATTGATGGTGTAC ATCCAAC TTTA GGCGTAGATATTATTCT GAAT GGAGCTAAGGTAG  
GGCGTGGTAACATCATTGC CAAA CAAGATGTTCTAG GGATTTCGAGT TTTAGAAGTATAAGCCT TTTA GTA  
ATAGAGAGT CCTCTGTC ATTCTACGTGA GAAT TG CAAA CTTGCCGCTA TTTC ACAAGCGGCAAGGACCTA  
GCAAAATGCTAGAGGTATC GAGT TCT GAAAGCATTGTCACACCGTAAGTT TTTA TGCTCAGATC GGGTGT  
ATCC TTCTCCTCCTCTAAGACGAACTATCTCCTAACACGGGAGCTCAGTCGTAAGGTAGGGT TGACTGTC  
TATCAAGGTGT GGAT GAGC ACTC TTCTCGTCTGTGTTTAT TAAA ACATTGGTATCGCCAGGAATTCATG  
ATCGACGT TTTC TTCTGTC TTTC GAAGAAGAAGCAA GGAT TATGCAGCTAGTAACGC ACCCAGCG CAAAT  
TCGCTTGGAGGATAGAGGA GAGT GTGAGCAGGGACGCTACTTGG TTTC GGAATACAT TTTA GGGAGT TCT  
CTGCGAGATAGTATTCT TTTC ATCGCAAATCTC CAAA GATAAAA GCGA TTTC TATTGTC TTGCAAGTAGCGC  
AAGCTATCACGACTC TGCATCGGCATG GGGT TTTA CATCTCGATATCAAACCA GAAA ATATCGTGTCTCTC  
GCAATCAGGCGAGATCAAGCTCATTGACTATGGGC TTTC CGCTTGGCAATTC AATCATTGGGGAT CTCCA  
GCATATAT GAGT CCTGAGCAGAGCAGACAGGAACCGCCCTCTCCGGC ATCC GATGTGT ATTCC TTAGC CA  
AA TTGGCCTATGAACTGATCATGGGGCAGCTTGCATTAG GAAA GGTATATGTATCGTTACTGCCTTCTAA  
GATCAGCAAAAT TTTA ATACAGGCATTACAGCCATCACCGGCAGCAGCT TTTC ATCCATGCAAG GAGCAA  
ACAGAAGC TTTA CAAGATTACTTATTGCACGATGTACATGAGGAT TATCGTAAGAAA GACCATGTTGTTG  
CACAGATAGAACAGTGGCACAATCAGAGAGCGTGGCTATCTCCA GAAA AGTTATCTGCTCCGGAAGAGAT  
CTGTGTTCATA TTTA CTCACAAAAGAGCCCTGTTA TTTA CATAATA TTTA CTATGATATGCTTACATCT  
GGAAA CGTAGCAGAAT CAAA GTTCTGCTACGCTCCAG GAAA CTGTAGT CAAA CGCTTAGCATGAT GAAAC  
AG TTTC TTAATCAACGAGAGGAGAAA GCAAAAGAT ATTCAAACAGTAATCAAAGTAT GGATACTCTGTG  
CAAAACCATGCATATCCCTACAAATAAA GAAGGGA TTTC TTGTTGCTGT TTTA TATT TTTC CTAGAAGAA  
CTC ATGTGCT TTTC TTGTGG GAAA ACTGATTTCTCGT TAAA AAAGCAAACAGGGG GGGTGC AACGA TTTC  
AAGCG GAAT CGCAAG GAAT TGGGGAG GAAACTC CCCTAGAGATCC ACGAACAGTCCTT CAAA TGGGAGCC  
TGGAGATGAGCTTATCGTACAC ACCC CAAAAGCTAGAGACAAA GTATA TTTA TATTGCCCTTC TTTC CTG  
AAGTTGCAAGATAGAGGGCAAATAGATAT ATTCTGC GAAACAGATAACCTGCAGAAGG GAAT AAGGCAGA  
AGTATGACAGAAGTC TTTATCC CTCAACACTTATCAGCT TAAA AAGAGT CCGGTGAACATAGTGACGTCG  
AACATAGGAAGCAAGAT TTTAAGAAT CATTCAAATAACAAGAAA TTAGGCCTCTGTCTGCGTTAGTTG  
TTCTAGATGCGGCGTTGTTAAGTGT GAATTC ACGATCTGGCGAAGGCTTAATAGGCCAGTCCGCTTC CAA  
ACC GAAT TATCATGAGGCAGAACAGCAGATCGCTGCTTGCCCT TAAA AATATTGCTAA GAATTTA GCAAAG  
AAA AGCTCTCCAGGGGC TAAA CCTACAGTAGGAGCTCCCTCTCCTGCACGGCCAG TTCTGT TAAA GGCAG  
CTCCTGCAAAGCCACAAGCTCCTGTGCGACAAAACACGGCAT TTTAAA AAGAGCCATCAGAT TTTC TCTCC  
TAAT TTTA CGCAGTCTTCCCAACAGGT GAATAAA CTTGAG GAAA GAAGACGTCC CAAAGAGTCTCGATAC  
TTACAAGGCGCGGCTAAGCAGGCAGCTGCTGCAAAG GAAAAAAGGCTCTTGAACAGGAGGT ATCC AAAC  
AAGAAGAAGAAGCTTC TAAACTC TGGGAAGA GAAA CAGAGT TATGCTCGTCTGCTGT GAATGCCATCAA  
TTTC AGTGTAAGAAA GCAATAGAAGAGCAACAGAAA ACCATTTC CAATCCAG GAAA TGACCAGACTCTT  
CCTGGGAA GAAA GATCCACATAC ATCC GGAGAACCTGTT ATCC AAACGGTACAAGACTGTTCTCAGGATC  
AAGAAGAAGAGAAA AAAGTTCTAGAGCGAT TAAA CAAACGTTCTCTGACGTGTCA GGATCT TAAA GAAGT  
CGGATATACTGTCAAT CAAAAGGACA TTTC TATCTTAGAACTGCTCCAG CAAA TGAGCAAGATCTCAGGA  
ACGAA TTTC GTT CAAA ATAGCAATGACTTGCAATTC AATGTCACTATCG TTTC TCACG ATCC TACTTCCG  
TAGATGA TTTAGCAACG ATTCTGTTGCAAGTCTT GAAA ATGCATGACTT GAAA GTCGTTGAACAAG GAAA  
TAACGTATTGATCTACCGCAATCC GAAGC TTTC CAAGC TTTC CACGGTAGTCACAGAT GGATCAGCAAAA  
GATACTTGTGAAGCTGTAGTAGTTACAC GAGTA TTTC G CAAA TACAGCGTCAGTCCTTCTGCTGCGGTAG  
GCATT ATTCAACCGCTGCTCTCTCATGATGCAATTATTAGTGCTTCC GAGT CTACGAGACACATTATCGT  
ATCAGATATAGCAG GAAA TATTGA GAAA GTCCGG GAGT TATTGCAAGCATT GGAT AGCCCAGGCACCCT  
ATTGACATGTGCG GAAT ATGATGTGCAG CAAA CAAATCC CGCTGC CAAA GTCAGCTATTGTG CAGGAT GTTC  
TCGGTGCCATGGCTGAGGAAGAGGCT TTTC CAAAT TTTATT CAGCCTGGGACCAA TAAA ATT CAAA TTAT  
TTC CTCGCCACGATTAACAGCAAAGACA ATTC AATTATTGGAGT CCTGGAC ATTC CAGAAA TGGCACAT  
ACGTTAGACGATGTCACAAGTCTGCTGCTGC CAAA GGAAGCTCTGGAGCTGCTA ATCC TAAGAG CAAAC

GCTTCTTCATGTACAAAT TAAA ATATCAAATGGGGCAGCTATCGCTCAGGCG ATTC AAGATATT GGATA  
CAATCTCTACGTGACAACAGCAAT GGAT GAGGA TTTC ATCAACACATT GAATAGTATTC AATGGTTGCC  
G TAAA CAACTC CATCGTTGTCATTG GAAATCAAGCTAACGTCGATAAGGTCGTTAGCTTGC TAAA TGGGT  
TGGACCTCCCTCCAAAACAAGTGTACATTGAAGTATTG ATTC TAGAGACAAGCTTAGAGAAGTCTTGGGA  
CTTCG GAGTACAATGGGCAGCTCTTGGAGATGAACAAGGGAAGGTGGCATATGCTTCC GGAT TGTT GAGT  
AATACAGGATTAAC GGATCCCTCCGTAATCAATCTCTGCCTGTAGCACCTAACCCAG GAAA TATCTCAT  
TGCCAACACCTGGTCAGTTAGCAG GGAT CAGTGATATGATGTAC GGATCCTCTGCATTCGGACTAG GAAT  
TATTG GAAA CGTTCTCAGCCATAATG GAAAATCGTATTTAACATTAGGGGGGT TATTGAGCGCCCTAGAT  
CAAGATGGCGATACCACAGTGGTACTTA ACCCTA GAAT TATGGCGCAAGATACACAACAGGCATCGTTC  
AAA TAGGACAGACG ATTC CGTTCCAGACTAC GAGT ACGGTGATTC AG GAAA CC GGAT CTGTTACACAAA  
TATT GAATACGAAGATATCGGAGT CAATCTTGTGTAACTTCGACAATAGCTCCTAATAATGTAGTCAC T  
TTA CAGATAGAGCAAACGA TTTC T GAGT TACATTC GCGCAAGGTGTGCTGACTC CTGTAACAGA TAAAA  
CACAAA CAGCTACGAGACTACAAGTTCC GGATGGATG TTTC CTCGTTAT GAGT GGGCATATTC GTGACAA  
ACTGACAAAAATTGT ATCCGGAGT GCCGTTACTCAGTTCCTCTTCTCTGATCAAAGG ACTC TTTA GTCGG  
TCTATCGATCAGCGTCA GAAAC GAAA TATTATGAT TTTC ATTAAGCC GAAAGT CATCAGTAGCTTCGAGG  
AAGGAACAGCGTTATCAAACACAGAA GGATATCGTTATAACTGG GAAAGCGAAA GA GGATC TTTA GAGGT  
AGCCCCTCGTCACGCCCT GAAT GCCAGCATATTC CTAAGGTCCAAGCAGAAA GTAAT TTTAAA ATGCTG  
GAAA TAGAAGCG GAAT AATGTTATAA GAGT TGCAAGTTGGTATTC TAACGCCATG GAATAGCTTCTGACT  
CTAGTG CAAATACACAGGGGGGAAGTCAAGATGGACTG GAGT TAGCCGATCTCCGTTCTCTTGGCTT T  
TTA TG GAGT TAGCC TAAA TAGCTCAGTTGGTAGAGCAACGCATTC GTAACGCGTAGGTCGTCGGTTCGAT  
CCCGGC CAAAGGC ATTC CTAGGCAG GAGTAATTC GATTAGGGT AGTCGCTTAGATAT TTTC ACATACAGGC  
CGTCAATATCTAGGTTGAAGGAGGCAAGTAACC ATTC CTTCTGCCCTCTCTCAG ATTC GAAT AATCAGT  
CGCTCTGCCTG GGGT CAAA TTGCC TTGGCC GGAT CTGGGCGATCACTTCCT TTTC AATGCTTCTATTTCG  
CAGTATCTTGGTTATACAGAGCAAGGTGACCTCTGCGTAGATCC CAGAATAAAGGATTC CATAAA GGGTG  
GT TTTC ACTATCTTCAATCCACTGCAT ACTCATTC CTAATTGTATCCAGCTAGTGGCATCCAATGCCTCT  
TGCAAATC TAAA CAACA GAAT GTGT CAGCATCCCCACAGAACG TAAA ATGCGATTT TTTATTTCTGTAG  
GAT TTTC TTTC ACAAGCTGG TTTC TAGCCTC TTTC TCAGCAGATAAA AT TTTC GACACTACTAGTCTTAA  
TGAAGATAGGAT CTGCTCTTCTGATAGCCCTAAGGAACAATATTGGACAAGCACAAGATATCTCCTAAT  
GATTC TTGTGATAACGGCAG TAAA GAAGAGCTAGCGA ACTC ACGTTGATAGGGAAC TAAAAGCTCAGATA  
ACGCATCTCCATACTTAAGAGCCGGAACATGAACAAAGGCTCGCGCTATCAGCGCTGTTCCACAACGTAG  
GGGATCAGCGGT TAAA AATCC AAAATCTGAA GAAA AAGCAAAAGACAGAGACTGTTG TAAA CGTATATCT  
AAA TCGATCAGCTTCTG GAGT AATACTTCCGGCTGCCATACAAAATCTACGCCAT GGATCACTACGTGGT  
CAGGTAGATTAATGCCTGCTAACAACGTGCCTGCCTGAT TTTA CAATTAGAGCCTCACCTTCCAAACA ACT  
CCC TAAA TGATATG GAAA CAATAATGTTCTAA TAAA C ATTC TCGTTGCCAGATAGGCAAATC TTTA AGG  
GGTAAA ACAAG AATTC CTCACCTTCGATAGCC GAAA ACTG CAAA GCTATAGTCTTAACACATCAGC CA  
AAT TTTC CTTA GAAA GACAGGGAAC GAACAAAGAAA CAGAAA GAT TTTC TAGA TAAA GAGAGCGTGCAAT  
AGGGCGTGGCGTCTCTGTTCTCAA GAAT GCTTGATCGTTGCGATAGCAGTAA GAAT ATGATTAGGGAGC  
ATCGGTAGT ATTC TGATTT TTTA GCTGATTAATCTGATCAC GGAT CTCTGCTGCTTGTTCATAGTCTTCG  
CGGCGCAGAGT CTCTTG TAAA GCCTCGTG TAAA GCAATAAGGCGCATAGCT GGGT TGATGATTGGTTGTT  
CG GAATTC CCCAAACCTCGACCAATAT GAAAGTTA CAACT TTTC TCTGATGTATAGGAT GAAA TCGCCTG  
ATAACGCAGGAGCCT GGATAGGAT AAG GGATTTAAA AGTGCATAGCATAGATGACAGCCTAATAGGAGC  
TC ATCC GTATCAC GGATACACCA TTTC GT TTTA CAATTACCGC ACTC TAGAAT GAGCGCTTCAT GAGTAG  
GGGAGGCTAGAAT CGTCTCGGATCGTAATAGCGAGAG GGAT ATGGACAACCTGTACATAACATAACATCG  
AGAGGTAATGT TTTC AGAAATTTTC TG TAAA ACAGATAGTGGC GGGT TGCTGACAATTATAGCAAAGAGCA  
GGAG ACTC TTCTGTATGATCCATATC GAAAGCCGTGCAGATACAACGAGGTAC TTTC AGCAATAACAGAA  
AAAAACAAAGGAAG GAAA TCTT CAAA ATGAGGAGGGAAGATCTCTTAGA GAAAGAAA TGGGTCTTGAAGG  
ATTC GAACCTTCG ACCCTCTCAT TAAA AGTGAGATGCTCTAACCGCTGAGC TAAA GACCCGCA TTTC TT C  
AAA TAATG ACCCAAGGGGATTC GAACCCCTGTTACCG GAAT GAAA ATCCGATGTCTGGGCCAGGCTAG  
ACGATGGGGCCAGGAC GGGTCTAATGTTATCAC TAAA CCCTTTT TTTC TGCAACTC TTTC TGTTCTCTAA  
CGCAT TTTA TTTTGA GAATAGGGAAGTTGCACAGAAGCATAACTACACCGTAGCTA ACTC TGCTTCTT C  
AAAT CAAA CAAGCTCTTCTA CAAA CTTACAAA ACTTATCTGTGAGCTCTTGAAT TTTC TTCTCTAAGCT T  
TT CACAGC ATCC TCTGTTAGGTTGTC ATCC TT TTTC AGCCTATCAT TAAA AGTCCGTC GAATATTAC GAA  
TAGCAACCTTCGCTTCTCGCTCTTGGCTTCAGCTGCTTAATTACTTCTCGTCGGT ATTC TTCCGTAGG

CTCCGGTACGTTAATCCGAACCGTGGCTCCTTCAACTATAGGTTGTAGGTTTAAACAAACTGCCAAAATT  
CCCAAAGAAATCGCAAAAACCGTCCCTGCATCGTAAGGGGAGATTAAAAGTTGTGCGATATCAGACACGC  
TAATCGATGCAATGTCTGATAGTCGCATGGTTGTCCCGTATACCTCAACAGTAACCGTTTCTACCAACGC  
TGGGTGCGCCTTTCCAGTTCTGAAAACACGGGTCTCTTTTCTGAAAACACGTTAACACTCCGGCCATCTCT  
TTCTCCGCAGAAGCTAGTGTATAATTTGCTCCTTCCGCAGAAGATATCACTGTACCAACAGTATTAAA  
GACTGCCTCCTCTAAA GAATGTCTAGCAAAGCTAAA CATCTTTA TGGGGATTCCTGCTTCCATACACAAA  
GATATGGCAGCCGGATCGATCGCTCCCAATCC TTGGGAGAGAAA GTCTCTGTAA GAAA TATGATCGTACC  
TTACTGCATCAGCGCATTCACGAGGATCTTGGTCATACACCCCATCCACGTGCATAGTCGCTTTTAGTAA  
AACATCGACC TTTAATTCACAGGCTCGAAAGCTGCACCTGTGTCCGTTGTTAGATAAGGAGCTCCTGCT  
CCCATGGTGCATATCACAAC TTTA CCC TGGCTTAGGGCGTCAGATGC TTTCTGC GGAT TATATAACTCTG  
CTAACTGTGGGCATGACAAAGTCGATGTCAA TAAA TTGGGCACATCC TCAGTCTTCAAAGCATCC GCTAA  
CGCCATTC CATTAATTAATGTGCGTAAC ATTC CCATCTGATCAGCC GAAACCC GATTAATCTGCAGGCTC  
TGGC CAAA TGAGAGACCGCGGAGGAT ATTGCCCCACCGATTACCACCGCGACCTCAACATCTGCATTGC  
GGACGACT TTTAATTC CGCAATCAATCGGGAGAGTCT TTTCTTCACTAAT CAAA TTACTAGAAT CTCCATC  
AGAAA GAGCCTCTCCAGAGATCTT GAA TAAA ACTCG TTTCACTC GTTT TTTTCATCATCTCGCCA CAAA GT  
TATGCGCCCAT TTTTCAGAAGACAAA GTGCTCAACTCTGAGTGGCTCACCCTAGCT CAAA CAGCTCTAT  
CAATCAGACCTTGAAT TGTGACTTCAGGGTCT TTTAATGAAGGCTTGTCTAA TAAA CAAGCCTCTTGAAA  
AAAGGC TTTAATTTCCCTTGAGTAA TTTCTCAACTACTTCTTG GGGTTTCCAGCCACTTGGGAAGAAA  
AATACTTCTCGTTCTCT TTTCTAGAAA TTTCTTGAGGAACGC TTTCTTTA CTTAAGA ACTGTGGCTGACTTG  
CGACAATATGCATAGCAATGTCT TTTAGCCAAAGCCTCTTGATTC TCAGACCCAGAAA GAAAACTATAGC  
CACAGCT TTTTCATTTCCATGAGAAA TAAATCCCTACAC CAAA ACCA GAGTAAACAGGCGTGTAGAAA GCT  
CGGCTAATGC GGATATTC TCTCCAACCG CAAA CATCGTGACAGC TTTAAGCTCTTCCACAGATAAGGAAG  
GCTCTTGAGAGGACATTACGCGAGC TAAAGCTTCAACATCGTAAGCTTGTGGTCAAGAAGATCGGACAA  
TAAA CTGTAAC GAAT GCTCG GAAA AACTGTTGTAGCAACAAAATCAGTTTCAACGTTGACTTCAACA  
AGTGCTGCACCACGTTTCACTCAACTCTGTCAGCAATCAGCCTTCTCAAATTTCTCGGTGCTCTTT CAAAC  
CTGCAGAGGCAAGACCAAGCTTACG TAAATAAAA CAACAGCATCTTCTAAATTTACCTTAGCATGCTCTAG  
AGCCTCT TTTACATTTA GTCAGGCCCTACACCTGTCTGTCTTAAA TT TTTCAATG TTTTCATGGAGAAG  
TCGCTCA TTTCAATGCCTCGCAATTTGCAATATCTGCCAGAG TAAA ACCCCTCT TTTAGAAGAAGCTTC  
ATCTTGAGCTTCTCCTGTTGGAAGAGGAAGCTCTTCAACAGCTTCTTCCGCAGGCT TTTCTGCAGGACGC  
ACCGGAGATAAAA TTTTCGACGCC TAAA CG TTTCTTCGCATCAATAACAGCGTCT TTTAAGTGTATTAACAA  
TCAGACGGATACTCTTAATGGAATCATCGTTGCAAG GAATAACGTGGTTGATTGGTGTGGATCGCAGCA  
AATATCCACTAAA GCCATGACAGGAATGCCAAG TTTCCAGCTTCTGCAACAGCAATGCGCTCATAGCCC  
GGGTCAATTACAATCAGAAGCCCTGGGAGAGAGTTCATATGACGAACGCCTTCCAGGTTGTTGAGCAACA  
AACGATGTCTT CAAA CTAATAAAA GCGAGCTCTTT TTTCTGTAAGACCA GAAT TAGAAGCCTCAAGATCCAA  
TTCAATTC TGTTCATGTCTTACAGAG TTTCTAATGGTTGCCATGTTGGTCAACATGCCGCCCAACCAT  
CTCTCTGAGGCAAAA GAATTCGCCACATTCGATAGCAGCTTCTCTAATGATCTGT CAAA CTGTGTTT CAAA  
TTCCAACAAAACAAAATAGACCTCTCTGATCGATAGTTT CAAAAAT GCAAGAAA CAGCCTT TTTCAACTG  
ACC TAAA GT TTTA GCCAAGTCGATGATG TAAA GGCCATTTT TTTCTTCAAAAA TAAA AGGCTTCATCTTG  
GGATTC CAGCGACTTGTCTGGTGTCCAAAATGTGCCCC GGATTC TAATAGTTCT TTTAAAGT GAGCAAA  
AGGGAAGTTCCAAGC CAAA TTCTCTTT TTTATGTGTTAACAAGGCATCTGAGAGACGCTCAGATTTTCAGA  
CTTGGGAGTCATACAGGAG TAAA AAAGCGCCCGATCA GAAT CGAAC TGACACCGGTAGCTTGGGAAGGCTA  
CAGCTCTACCATTGAGCTACGGGCGCGTCAAGTAGACCGATATAGTATTG GAAA AGAGGGTT TTTATGC  
AATCTTCT TTTAGAGAAA TTTA GAT CAAA TTGGTAAGAGAGATAGGAGGGAGATC GAAAGTAAGAACAA  
AAAT CAAA CAAAAAAACTGG ACCC GACCGAAGTCGAGCCCA GAAA CACGGAT AGTGTATTAAACGTTA  
TTAACAAAGATAAAA CTGCCAAAG TTTAACAAAAT TATACAATTAATTAGAAGCG GAATTTGTGCA TTTAC  
GTGAGCAGCTCTCTCATCGATCAAGC GAGTCTCAACTGTAAGTGCCTA CAAA TCTGCATCCACAATAGTT  
GTTCTACTGCAATACCGCAAGAT TTTCTAGATTTCTATCTGTTCAATTGCAAG GAAA CGA CAAA CATGG  
TATCTCCGAGCTG ACCCTCTGCGCTAGC TTTACATCGCCAGCTCCAGCAATAGTT GGGTT CAGAGT GGT  
AACATCAAAGACAGTTGTAGCTGACTTCGGCTGAGCAATAC GAAT CGTGTCTGCATCAAACTTGCTCGA  
GACCA TTTA ACTC CAATGTAGGGAGT GAACAT ATTC AGTCTGTAAGAGAGAGC TAAA CTGCTTGCCATT  
CATGGTAATCAATAGAGGCATCC TTAGTTCTGTACACCATCTGTTCTCTGCTTTAAGATCAAGAGGGAA  
TTC TTGCCCTACAT ATCC TTTA GGCTTATTGATAG TAAA CT CAGCTGCGTTACAGAGAACG TTTAATTCT  
TCGAC TTTAGGCTT GGAT TGAGCGTATTG GAAA GAAGCGCC TAAA GTGCGCATCC ACATTC CACAAG



CTGCACGAGCTCCAGCACTCCAAGCAAAGTAGTATCTGTATACAACCAACAACAGATTGATCTAAGCT  
CATACAAGTACAAGCTTACTATCTGAACTGTAGCATGGTTCTCATTATCTCCGAATAACCCAACTAAG  
TTGAAAGATGCTGAATTTCTTTAAGATATCCACTGGTGGCTCCTAATGTACAGAATACATCAAAACGAT  
CCCAAATATTC AATGCCATGTAAGCAGCAAAAATAA CATCTCAGCATCC TGCATATGTCGGCCGTAAGC  
AGGATTC TCTCTTGCTGTACAAGTGGATGGAGCTGCAGCATTGCCGTGTAGCAGTTGTAGGCTTGGC ACCC  
ACAAA GAATTC TTTA TTC ACATCTG CAAA CAAAACACGGTC GAAA ACAAAGTCACCATAGTAA ACCC ATAC  
GCATGCTGATAGCGTCACACCAAGTGGTGCAAGGATCGCAA GGATCTCCGCC GAAA CCTTCCCATAGAAT  
TC CGTCGATCATAAGGCTTGGTTCAGCA GGATTC CCCACAGGCAGAGCTTGCAAGGAGGAAGCAGAACTC  
AAAGCGGCAAACACTAATACCGA TTTC AAGAGT TT TTTCA TTC TTACCTC TAAA TTGTATAATTAGCTCT  
C CAAA TGCTCGCTATCTT TTTT TGGCGGCACTGCGTCCTAGT TAAA GCCAGACAAGATGTCCTGTAGCAA  
TTAATGGCCTGAGGAATGTCTTGAAG TAAA AGCAGCCTTAATCGAGAACATGTCGTTCAATGCTCGAGA  
CCATAACAAAAT TTTCTT ATTC TCG TAAA GTTGATAA GAAA AACGTTTCGTCGCCAGGAAGAAGCCCTTAAG  
CGCTCCTGATTTA GCGA TAAA GCAGAGAGCCATT CAAA TATATCTT TTTA TGT TTTA TGTCTTGGTT C  
AAACGAAA AAAATCGCTCTGAAA CCGAGAGCAAAGCCATGTTGGCAATATGTTGATTGTTGA GAAT GAG  
AGGGT CAAAAGT TAATTACAAAACAGTTCAATT TTTA TGAGT TGTAA TTTT CAAAACCTAAGATT CAAA  
TGCAAA GAATAGCTCGAAGATGGGG CAAAAGT TAAA A GAAA AGAGGAGATT CAAA TAG GAAA ATCTAAGA  
ACAAA T CAAA ATAGAAA TCGTT TTTA T TACTACAAA GAAAGTGT TTTAAA CGGTCGACCAATAAA AACA  
GAT TAAA CTAACCATATAT GAAA A GAAA ACGACGC ACCCCACT TTTCTGTGCCA GAAA AGGCTAACAGACT  
ACTTGTGGGATTTA TTATTGCCAAA TCTATCATCAC CAAA CGTATATGGCATGTTGCTGTTGTGCAGCAT  
GAGAAA AAGAAGGAAGAAGCTTATCGTCTCAGCGTAGAAGTGTTCCTGAGCATTGTGATCGCGCAGGAG  
TATGTGATCGT CAAA G TAAA ACCTGGCA GAAA ACGT TTTA CAATATAATGTGGG GGATCTCTTATCGAGC  
GATACGTGATATTC CGACGCGTG CAAA GCATACAGATGAGCAAGG GAATAAGAGGCTTGTTCCTGTTCTGT  
AAGGATTACAT TAAA AAA CAAA CAGATTT CAAA GCTCAAGAGCTGCATATGGACCCTGA TTTTCTTTGAAG  
ATACGATCCATGCCAAAGCTTCTGTATTAGGGTCTGTACCTTAC ATCC TTCAGACTAATGTATCTGAGCG  
TACTTT TTTAAGGCTCAAGATGCTGGAGAAGGAT TGGCCAGGAT TGCATGTC GAATCTTCGGTTCGCAGA  
CATTATCC TGAAGGGCGCACAGTAGCTGA CAAA TTGGGGTATGTCGGACCTATTAGCGCAGAAGAACATA  
GAAA AATTACGAGG GAGT TAG GAAA CCTAAGAGAAT GCATTC GTGCTTATGAAGA GGGTGAGGATCC TAA  
ATTTCTGCAGGAAT ATCGAGCGTCGATCAAGTACGCAAGCT CAAA CAT GAGT TAGAGATGCATGCCTAT  
GGAT TAAA CTC CTTGATCGGCAAAT TAGGTGTAGAAGCTT CAAA TGATCGTAAA TTAAGAGG CAAA ATAG  
GCAAGCGATCTATGCTGGTAGATCGAAGAGGGAAT TTTATTC AGGAGATGGAAGTTCCTTCTGTGTTGGAAG  
CCCAGGTAGAACA ATCC AGTTAACGATCTCTACAGAGCTACAAGCT CAAA CT CATGAGCTCCTTGCAGAA  
CATGAGCGAGGTGAGGTG TTTACGATTATCGACAGTGGCGTCAGCAACAATA CAAA CCGCCTTT TTTCC  
CTT GGA TAAA AGCGGGCGATTGTGCTAT GGATCC TAAGAAT GGGCAAATTC TAGCGATGGCCTCTTC  
ACCACGTTATGACAATAATGAC TTTA TCAATAT GAAA ACTCTCCTAATCAGGAG GAGTGTCTGTTCTCTCT  
GTATTGCGATGGCTG GAAA ACCTT GAGT ACATCGGAGAAGTACA AAA ATAGACCGGTTCC TTTA CGAAGAG  
AGCGATT GGATCC TCTCAGTG GAAA ATAT CAAA ATGAAGAGCTCTCTT TTTCTGATCGAGCTTT TTTAGA  
T TTTA T CAAA CCAGACACGTC TAAA GTTAAGCAGATGCTATGCGA GAAAGGTTCTATTGGGC TTTCTATT  
TATCTGCAAGGAACGATCGAGCAGCT CAAA GAAA TG CAAAAGT GTGAA GAAAAA GAGT GTGGTCTCGTTC  
AAA ATGTTCTATTCC C TAAA GA GGAT GGGCATGAGATTATCGGAGAGGTCACATCTCT TAAA CGACAGAA  
ACAG TTTAAAGCTATCC TTGCT GAAA GAGAAGAAGAGGTACAAGCT TTTCCGCGAGCGTCTTGGCTCTATT  
CAAA CAGATCTATCTGCCAACTACGA TAAAATTC TA TTTCT GGAT CTATTGCGTACGGCAGTAGATCCAG  
AAA AAGTCTCTATCTCT TTTATTAGCAGAAA TTGGCCATATGTCTGTCTT GGAT CAAA TAGATTATCAAGG  
GCA TTTCA TTGC CAAA CGGAAA TCA CAAAC TAAA CTGATGGAGAAT GCATTTA TCGATCATGAT TTTACC  
GCTTGGCGTGAAGAGCA TTTACACAG TTTA TTAAGCA GAAA CGCGATGAGGAGT TGGAGAGGAAGCAAC  
GAT ACCCAACCC CTTATGT GGATTA TTTA GTAGAAGAGCGGTCTCGGCAATATGCTCTTT CAAA CCGAGA  
GCATAT GGATTC TTTA T TACTTT TTTA CTGT CAGAGATAGAGCC TCTCTTGGTA ATCC CTATTATCAG  
GAGATTGCTTGTGGCGCCAAGAACTACGTTCTGGCGCCT ACCC TGC TTTAGAAT GCGGAGAGCATTACG  
ATTT TTTA CATAAGCA CAAATCGCAGACCTCTTATGA TTTA TGCGAACTG CAAA CAGCT TTTTGA GAGTT  
TTCTGAGCTTAAGCGTCTCTATATGGACAAT ATCC ACTAACACTGACGCGGAACATAGAGCAAATAGAG  
CAGGAT CTGATCGCTCTT TTTA CCC ATTGTATGGTTATGGGCATCTATCTGCTCATGC TTTCCGGTCAAG  
CAGCGAC TTTAGGGT CTATT TTTA AGTTAGTATCTGCTT ATTC CGTTCCTGTGCAGCATCTTTCTGACCA  
AGAAGA TTTATCTAAGTTATTGGTGATCGTAGATAAGCAATCTCTGGGGCTGCGTTCGGGAAGCCTCAT  
GTT GGATTT TTTAAA GACGGCTCTCCTATTGCTTC TTTCTTTAAA GGAG GGATTC TGCCTGGGAAT GATT

ATTC TGGGAGAGGGT ATATCGATCTGATCGCAGC CAAA GAGATGTCTAGCAATCC CTATTTTTTC TCTTCT  
CGTTAGTGAATATC TTTC TGATCC TGAAGATTTA TGCGAGGCAGC TAAACTC TTCGGT CAAA GAGAAAA  
ACAGGGATAGGACTTCCTGGAGAAT ATGCTGGAA GAGT GCCTATCGATGTGCGATATAACCGTTCGGGT  
TATATGCGACTGCTATTTGGGCAACATACATTAGTGGTG ACTCC TTTC CAAACCGCAGTGATGATGGCGAC  
GTTAGTTAATGGAG GGAT TGTCTATCAGCC GAG CAAA ATACAAGGT GAGTGGTATCAAGGAAGTT TTTC  
CCAGAACAAGCTAAGAA GAAA AGA GAAAT TTTC TTGCCAGATTC GATCGTCGATCTA TTTC AGAGAGGTA  
TGCATAACGTGA CAAA GGGT CAATACGGGACGACGCGGTT CATGCGTCAACGG CAAA CTCCTGAACGATT  
GGCTCGTATTATTGGCAAACGAGCACAGCAGAAGT GATTGCGC GAGT AGGGT TAGATCGTGAGCGAGGA  
CGCATGAAA TT GAAA GACGTGTGGTTCGCTGCGGTA GGAT ATGAAGATGAAGCGTTATCTC ATCCGGAT  
TTGTTGTTGTTGTGTACTTACGGCTAGGA GAG CAAA GAAGGGAT GCTGCGCCTATGGCAGTGCGTATGAT  
AGAGAAA TGGGAAGAG ATTCG TAAA AAATC TTTC AGCTAATTC GTGATTGGCATGGTT CAAA CTCCTGTA  
AAAGGTAAGGTATTAC CAAA ACAGGGAACGACTATGGAAGAGGCG GAAA AGCA TTTC GCGAAA GAGTT CA  
AATGTT CAGGCATTAA TTATT CAAA AGTGGT GAGT ACGAGCAAGCAGAAGAGAGATT GAAA GAGT CCTT  
AGAGT TAGACTC GGAAGCTGGGCTAGCCTATTGTTATCTGGGGAT TATTGCGTTA GAAA CAGGACGTACA  
GCTGAGGC CAAA G CAAA GTGTAAGCAA GGGT TAGAAGCTGAGCCTGGAGACAGCTA TTTC CGTTATTGTT  
ATGGCGTGGCT TTTC GATAAAA GCCGATCGCTTAGAAGAAGCGATCGGGCATTATCAAGTGTATGCA GAGTT  
ACATCC TGAAGATATA GAATG TTATTTAG TTTC GGAGTGCATATCATCG TTTC TTGCGTTATGAAGAA  
GCGATTGCCTGT CAAA ATC GAAT TGCGCAGTTAGATCC ATGGAATCC TCAAGGTC TATACAA TAAA GCGG  
TCAT TTTC ATCAGATATGGAGGATGAGGAAGGCGCTATTGATTTA TTGAAT CTACGGTGAAGAGAAA CCC  
TCTATATTG GAAA GCTT GGGT TAAA TTAGGTTA TTTC TTTC TA GAAA TAAGA CAAA GGAT CGTGCAACG  
GAAGCGTATGAGCGTGTGTGTCAGTTGCGTCTG CAAA TCGGATGGCATTACAATCTTGGGT TATGTT  
ATTTA ACCTAGATA TAAA ACGCGATTAGCATT GAAA GCG TTTC AAGAAT CAAA CTGT TAAA TGCAGAAGA  
TGCGGATGCGCATT TTTC ATATAGGAT TAGCTCATAT GGAT CTTAAGCAAATGAGCAGGCATATGATGCA  
TTTTA TCGAGCTCTGGGGATCAATTTA GATCACGAACGTTCCGACTA TTTC TTGGGATATTTA CATCATA  
TGCAAGGC GAGT CT GAAA AAGCAGAAA AGGAAC TTTC TTT CAAA GTTGC TAAA GAAT CTGTG CAAA CTC  
CAAA TTACAAAA ACCGTAAGCAGCTCGGTT TTTC T GAGTAAA AAGGAGACATTAT CAAAA CAAGCGAA  
CCCTTT CAAA CTAGCAAT ACTC TCTCTGACCGTCTAGCGATTT CAAA ATTT TTTC AAAAA CAAA GTTGT  
AGAAA AATTC ATTTTT TTTC CGATCC GTGGCCAACAAGTTTT TTTC TTAAGGGCTG CAAA ACAGTCCTT  
TCCTT GGGT CTAGGGAGAGAC ATCC TCT TTTC CCTAGGCTGTCT TTTC TTTTT TTTC AAAAA GGTGTT CAAA  
AAAAATATCTC GAAT TGCAGTTCAGGACAAA CAAA CTTTT CAAA AGACAGAGGAGATAATAGGCTCTTT  
TCTCACGAGCTCC ACTC CAAATAGAGTGGCATCC TGAT GAAA GAGGAGGAT CATGGACGCACCGGTAGAT  
AAATTTTC TGCAGCAGCAG GAATATCC CTATGGACAAA TACTC CGATACAGTCGGAAGGGT TAGCGCCAG  
GTATTAGTGAAGA ACATATAGAGCAATTTGGTTCA TTTC CGCGGCGAGCC TAAA TT TTATTAGAT TTTC CG  
GT TAAA AGCGTTTC G CAAA TTGGCAAAGATGGAAGAACCTACATGGGCTCGCCTGCGTT ATCC ACCTATC  
GCCTATGATGACATCGTCTATT TTTC GGCCCCAAAACAAA GAAA CCC CTAGG GAAA TTAGAAGACGCAG  
ATCC A GAAA TTTC GAGACATTTAAA AAATTTGGGC ATCC CTATTGATGAGCAAAAAAGGCTTCTCAATGT  
GCAGGATGTTGCTAT GGATTTA GTG CAAA ATTC CG TTTC CATAGGGACGAC TTTC AAAAAAC CAAA GAA  
GATGCTG GAGT CAT TTTC TGTTCA TTTC GGGAGGCAATCC ACAAT TATCC TGAT TTTC AGTGAAGCGCTATT  
TAGGATCC GTAGTGCCAGCTCG GGATAA TTTC TTTC GCGGCAT TAAA TTTC TGCAGTGT TTAGTGAC GGGTC  
GTTGCTGTATATCC CTAAGGGAG CAAA CTGTCCGATGGAGATATCTACATAT TTTC GAATCAATGATAAA  
GAGT CCGGACAA CAAA AGCGGACGCTCATCATTGCGGAAGATG ACTC CTATGTCAGTTATTTA GAAGGAT  
GTACAGCACCTTC TTTC TCTTCGCATCAACTGCATGCCGCTGTTGTTGAGCTGGTAGCACATAACCGTTC  
GGTT ATCC GCT ACTC AACCGTACAAAATTTGGT ATCC TGGAGATCGTAAGACGGGGAAGGGAGGCA TTTC  
AAT CAAA TTACCAAACGG GGAT TATGTGCAGGAGAGC ATTC TAAA ATTTCTGGTCTCAGGTGGAAGTGG  
GTGCTGCGATTACTTG GAAA ACCCGAGT TGTATTC TAAA GGGAGAGAACAGTGTAGGT GAGT TCTATTC  
TATAGCACTA ACTAATGGGAAGATGCAGGC GGAT ACAGGAACAAAATGTTACATATTGG GAAA GGCTCT  
TCATCTACCATTG TTTC TAAGG GAA TTTC TGCAGAA GAGTCTCACAAATAC TTTC CGTAG CAAA G TTTC GA  
TTTC TTCTCAGGCAGTGGGAAGTTGTAATTACACGCAGTGGGACTC TATGCTTGTGGAGAGCGCTGCGG  
GGCTTATAC GGATCC ACAATTTGTTG TAAA CAATGGAGA GAGT TGCCTGGAACATGAAGCTGCAACTTCT  
AAA TTACGAGAAGATCAGTTGT TTTC TCTTCGTAGTCGA GGATTC AATACGGAAGAAGCGGTTAG TTTC  
TGGTACATGG TTTC TGTAGGGAGGTTATAGAGCTATTACCTCTA GAG CAAA CTCGGGAAGCAACCAAGTT  
ATTAATGATTAAGTTA GAAA ATAGTGTAGGCTA GAAA TGCTTCATCTATGTGATGTACATGTATGTTGTG  
AAGAAA AAAAGATCTTGAAGGGCTATC TTTC TCCATTCATCC TGGCGAGCTACATATTATTATGGGGCC

AAACGGCGCAGG GAAATCCAC TTTA GCTAAGGTGCTATCTGGAGATGA GAGT GTTGAGGTGTCTTCTGGG  
ACAATGACGTTGGCTGGGCAGGAT TTTA CTGGAGCTATCTCCAGAAGAGAGACTCATGCAG GGATG TTTA  
TTAGT TTTCAAC ATCC TCCG GAAA TTC CTGGGGT GAACAACCGTAT TTTCT TAAA AGAAGCTTGTAATGC  
CTGCC GAAAAGCTCGCAATCAAGTGGTGTAGATGATGCTGCT CAAA AAGAGCTGCTTACGCATCTGGAA  
GAGGTATAT GGATTC CCG GGAT TTC ATTTTT TTTCTAATAG GAATGT GAATGAAGGATTC TCCGGAGGAG  
AGAAA AA GAAA AACGAAC CAAA GCAGATGTTGGC TTTA GAGCCTAAGATGGTGGTTC TGGATGAACCCGA  
CTCAGGTCTTGATGTCGATGC CAAAAA GGGACAAA TTCTGT TTTA CAACGCTATCGTCAACAGCATCCT  
GAGACCGCTT CAAA TATCGTAACGCATA ATCC TAGGT TAGGTGATCTCCTGCAGCCAGACCATGTACATA  
TTCT CAAA AATGGACGCGTTGTCT TTTCTCGGAGACATGCATCTTATGGAAGAGCTA GAAAGGAA GAGTTA  
TCAAG AAT TATTAGATGTCGTT ACCC AGGAG TAAA CTATGTGGGGG ACTC ATCAGCAGAGACAGATTCAT  
CCCGATGCACGACTGGCAGACGTTACACGCTCTGTATGGCGTCAGTATCAACGCGATCACGTA TTTCTGAG  
AAGCTTGCTCCTGGTTGAAG GAAA TGACACAAGAAG ATTTCTTGGAT CTATTGTGTAGGAGGATGTGAGAT  
TGGAGCCA TTTCTCCTGAAGAGAG ATCC GCAACTTGTGTACAAA TAAA TGGATGT CAAA CGCCTTC TTTA  
TCTGTATTGCCTGCA GAAATCATCGTGGCCCC TTTA CGCGAAGCGCGTGCTTTT TTTCTAGAAGCACGATG  
AGGAAGATGTTGTAGAA GAGT TGCATTC TTTA CTTCGTGGAGAAGAAGGGACAGTTATCTAT ATTC CTGA  
AGGTAGAGAACTGCAAACACC TTTACAAATACAGCATCACTATGCTGTAGCGAGGAA GAAA ATAAGAAG  
ACGGTGAGCGTCCCTATATAGTT CAAAT TTTA GGGAAAGGGAGCTGCCA TTTCTGATT GAAATGG GAATGT  
CTGCCCTACC GGAT AACGTATATCTT CAAAGAAA AACGCTCTG TTTCTAGGCGAGGAAGCAGAGCTTGT  
CAAAA ACCATGAAGCCGCTTCC TAAA GGGACAGAAA GAAT CATATGGGCTCATCATGTAGAAGTCGAACGA  
AGAGGGGCTTGCGCATTG ATCC AAGACATGCGTTCAATGGG GAAA GGCTGGTTCCG GAATAGCTT TTTCT  
T GAAA GGAGAAGCTGCTCATGGA GAAT CTCTAGTTAAGGTATTAGGTGGAGAT TTTCTAGGTGTGCATAA  
CACGATGCATCATGATGACCGAGAGACTTTCGCGTCAAAT ATTC GCTCCATCTTGAAGAGGGGAGC  
TTCTCC CAAAAGGGAGGCATCTATATTAGTCTCGCGGGACGCTATCTAATGCTTATCAGAAGCACGATA  
CCC TCTTATTAAGTAATCGAGCTTCTGC ATCC ACA TTTCTCTCGGTTGGAG ATTC TCACTGACGATGT TAA  
AGCTTCGCATGGAGCCACTGTGGGCTC TTTAAA TGCGCACCT CAAA ACCTATCTTCGATCTCGAGGATTT  
AG TTTA ATAGAAGCCAAACAGGCTCTACAAAAGAGCTT CAAA ACGTTAGATATAGA GAAACCGTAT TTTCC  
CAAACTGCAGAAA CAGGATC TTTA CCATGTATAATGT GAAAAAAGACTTCCCTATT TTTAAGAAT CAGG  
GGGATCC TTATG TTTACAAAGATTC TGCAGCTACGACACATAAGCCTCAGTGTGTGATTG ACTC TATAGT  
GGAT TACTATAGTTCTTCATATGCGACTG TAAA CCGAGCTC TTTA CACAGCGTCTCATGATATCACC CAA  
ACACATTGGCAAGTGCCTTCAAAGTAGGTTCTGT GGAT CGGAGCGCAATATGACCAA GAAATCATT TTTA  
CCAGGGAACTACATCTTCACTGAACCT ACTC GCTATTGCAGCTAACGATAGTTGGTTAGCTGGAGGGAC  
GGTTGTGAT TTTCTGAGGCGGAGCACCATGCTAATCTCGTATCATGGGA ACTC GCTTGTCAACGTTCCGGA  
GCTACCA TAAAAAAAAGTGCCTGT GGATGATGAAG GGATGGTAGATTGTAACCATCTCGAGCAACTAT TAA  
ACAAGGCGTACAGCTGGTAAGCTTAGTTCATGT GAGT AATGTATCGGGGCGAGTTCTTCC CAAA CCAGA  
AATTGCTCAT TTTA GTGCACCGTTACGAGGC TTTACAAA CTGTAGACGGAGCTCAAG GAGT TGG GAAA GGG  
CCTCTTAATC TTTCTGAATGGG GAGTGGAT TTTCTATGCCT TTTCTGGTCATAAGCTGTATGCTCCTACTG  
GAAT TGGTGTCTATACGGCAAAAAGA ACT CAAA GAAT CGCTTCTCCTGTTGAAGGAGGAGGCGATAT  
GGTGATCGTATATGAT CAAA AAGAGCTGTCGTATCAAGAACCTCCGTTGCG TTTCTGAGGCGGGG ACTC CA  
CATATTGCAGGAGT ATTAGGAT TAGGTGCGGCGATTGATTA CAAA CAGGCTCTTCTTT TTTCTGATAACAG  
ATCG TTTA ACAGAGCTT ACTC A TTTCTTATACGAGCAGCTACTTACAGTTCCAGGT ATTC AGATCATTGG  
CCC TAAA CAGGGAGCTGCACGAGGTTCTCTGTGTAGTATCAGT ATTC CTGGTGTGCAAGCTTC GGATTTA  
GGTTT CAAA ATTAGACGGGAGAG GGA TTTCTCGTACGTTCTGGGCATCAGTGTTCACAGCCAGCTATGGTGC  
GTTG GGA TTTAGGACATGTTCTGCGAGCCTC CAAA GGTATCTATAATGATCAGCAAGAT ATTC TTCT TTT  
CGTAGAAGC CAAAAAA GATAT TTTA CGAGCATATCGTTCGTAATGCGCTTCCGT TTTCTAAGAGAGATGCG  
GAGTGGGCATCTCTGA CAAA CATTATAAGAT CAAA TATCTT GAGTT CAAA ATTC TGAGGACTGTCTGT  
AGAATACAACGAAT TGGGCTGT GAAT TAG GAAA ATATTGTGAGT AGATTACCTAGCGAAGATACACT TTT  
AGAAGTGAATATAGAGGAC ATCCGGGT CAGCCCT TTTCAACCTCGACGTACA TTTCTTGAGGAAGA TTTA  
AAAGAAT TAGTTC TTTCTATCAAGACGGTAGGACTG ATTCATCC TCTGTAGTTAGGGAG ATCC GTAATG  
GGGATAAGGT CAAA TATTATGAGT TAATAGCTGGTGAGCGTCTGTTGGCGCGCTTGAATTAGCAGGATA  
TAAA ACGTCCCTGTTGT CAAA AAGCAGGTGCTAGCTGATGATATGGCAGCAGAGGCGACT TTTA ATAGAA  
AATATCC AAAGGG TAAA CCTGA ACCC TTTAGAAA TGGCAGAAGCT TTTCTGACG CAAA ATTGTTGTT CAAA  
GTCTT ACCCAAGATAAGGTTGC TAAA AAAGTTGGGAAGAAGCGTTTCGACAGTAGCTAATTATCTGCG CAA  
ATTC TCTTCTTCAAGAGGTCCAA GAAA AAATGA ACTCTGGAGAGATCTC TTTA GGGCATGCCAAAGTC

ATCTTATCGTTGGAAGATGAAAATCTTAGACAGATTCAGAGTCAAAAATTATCTCCTGCAAGTTAGCAG  
TACGCGAGGCAGAGATGGAGGC TAAA CGTCTAGT GAAAGG TAAA GGAGCTTC CAAAAA GAAGACAGTTC  
TTCACAACCTTCTTCTCGACTAGGGTCAAATCAAGAACGGTTAGCAACAACC CAAA GCT ATCC TGTAACG  
G TAAA GCCTCAGGGAAGACGCATATGCGTATCATT CAAATAGAAGGAGAGGAAGCGTTAGAAGC CAAAG  
AAA AAGC TTTAACAACATCTTCTTCTGAAGCTATCTTAACT TAAA GGAACCTGCACGTCTCGGCGTCCCT  
CGG GAAATTCAGGTAATTGTGAATGGAGCAGCATTC GTGTGTAG GAATGCTGC GGAT TACAAAAGA TTTT  
TTCCGTAGCCCCAGTCTCTACGATCTGCC CAAA TACATGATAAT GAGTTCCGAACAAAATGAACGGACG  
ACTGCAAGATCATGG GAAATAAA TAAGTAGGT GAGT CGCGCTTGTGCTGTAACGAAGTTAGCATGTTCA  
GAATCTGTGCTTGCATAGATAGATC TAAAGCAGAAA CAA TTTT ATCACAGATAATCAGTTGTGGGGCTCC  
TAACAAAGCTCTAGCAATAGAGATGCGTTGTAGCTGTCCCCCAGATAACTGGTGTGGTAA GAA TAAA GG  
TAATCTGTAGAGAGCCCCACCAGAGA TAAAGCTT TTTT TACTGTAGCACCAGTTCTTC TTTAGAAA CTA  
AACGATGATAGAGT AGGGAATGACTTAACGTGTC GAAA ATGGT TTTA CGCGGATTTA AGGATGAGCGGG  
ATTC TAAA CACCATCC GCACCTGAGAATAAGATATTGCCTTCTTT TTTA TTATGTAGAGGGATGGCC  
TTGTCATTGAGTATCAGATGGCCAGAAGTTAATG GAATGAGCCCTGCAAGCCCCAGAGC TAAAGTAGTTT  
TCCAGATCCAGACTC TCCTATGAGACCGATAAT TTTA TGTCTAGGAAGGC TAAA GGACACCTGA TTTAA  
AGGCGTAGTAGCCACTTT TTTT TTCT GAAACCAGAAA GATCGCTTGTAAATAATG TTTAGTCAAGCGGCTT  
GCTTGGAGGAGAAGA GGAT TATTC ATGTAACCAGCACCTCACACGATGATGATCA TTTAAA GATAGGGAG  
TCCGG GGAT TTTT AAAGCAAATAGGCTGAGC TTTA CGGCAACGAGGA GAAT AGCAACAGCCCTTAGGAA  
GTCTTGTGTAATGAGGAGGCTGTCTGCAATAGGAACAAAGGCTGCTGTCTATATTGTGAAGGACGAGA  
AGCTAAGAGATCTTCTGTATAA GGAT GGGCAGGA GAAT GAAA GATCTCTTGGACAGAA GAATATTC TGCC  
ATACGGCCTGCGTACAAAACAAAGACATCGTCAGCCA TTTT GGCAACG ACTCCCATGTCATGAGTAATGA  
T TAAA AGACTCATCC CAGTTTTTTT CAAA TAATGT TTTA AGCAGTTGTAGAAC CAAA ATACTGCACA GAAAC  
ATC TAAA GCCGTTGT GGGTTCGCTGCTATTAATAAGTCTGGAGAGGTCAGCAAGGTCATAGCGATAGCC  
ATGCGCTGAAGC ATTC CTCCAGATAACTCGTGAGGATACAATTTA ATGCAACGCTCAGGATCTTG GAATC  
CTG TTTT CCGCAATACAGCTAACAC CAAACTCATGAGCCATTTA TTC GAAATTC CTAAGTGTGTGCGAAT  
GACTTCATGGAATGTTGTTCAATAG TAAAAACAGGATCAAAGGAAGCAAGAGGATTCT GAAA AATCATA  
GAGATT CAAAATCCAAACAGGAC TTTT GCACAAA TATTCTTACGATCGAGGAGATTC TCTTTA TAAAAA  
GAGCCTCTCCT GAAA GAGAAAAGCTCTCTCCGGGAGAAGCTGCATAAGAGATTGTGCTGTAATGGATTT  
CCCTGACCTGACTC CCAATAATAGCCAGAGC AAA GCCTGG GAAA ACATCAAAGGACAAAAGAGTCCACA  
GCTAGAAAATGATACAGATTTTCTA TTTAGAGATAC GAAA GATT TTTA ACTTGCAGAAGCGGCTGAGCAC  
ACATAGCTATGTATCTCTACTACAAA AAGGGGACCTCGAGCGT GAAA AATCTTAGAAA AAAACAAAAA  
T CAAA GTTCTTAGTAC ATTC TAGATTGCAAATATATATGAAGGAGGTATAT CAAA GGAGCATT TTTCT  
CAAAGACAAT TAAA AAAGGCTTATATGCAAGTCTAGCAAG TTTA TTC GGTCAATCTCCT CAAA CTCCAT  
TACAAGCACATTTA GAATTAG TTTT TTCGACTATCAATGTTCT TTTT CCACT TTTT AGCGCTCT TAAAGA  
AGGCGATTAT GAAA GGGT TGGGGT GTTGGCTCAGCTCG TTTT TCAAAGAACGGCAAGCTGATGGTATG  
AAA AACGATGTAAGAAGACACTTGGCTTCGG GAGT A TTTT TTCTGTATCGCGCGACGCTGTGGAGA  
TCA TTTT GATACAAGATTC CTTAGCAGATTGTGCTGAGGATATCGCAAT CAAA TTGACAGT GAAA GAGCT  
GCAGT TTTATCCA GAA CAAAAG GAGT GTTCTTC GAG TTTT TGCAAAGACTGTGCAATCTTTT GAAGCT  
GTTGCGAAA ACTATACGAGAGAT GGAT CGCCT CAAA GAATCTTC TTTT GGTG GAAA TCGGGCAGACAAA  
CTC GTGT TTTA GT GAGT GAAGTATCTAACCTGAACAT GAGT GCGA TTTA TTGCAGAGG GAAT TAATGAA  
GGTATTC TTCTCTGACGAT CAAA CTATAGGGACAAA GGACAAA TTCTCTGGAT GCAGATTATTAAGGG  
ATATCGGGGATATCTAATAATTC CGA GAAACTAGCTTATCGAGTGAGTATGACGCTAGAAGA GAAA TAGG  
CATGTGGTTGCTGCTGG CAAA TGTAGTTGTAGGC GGATTC TACACAGCTTGAACATAGGCGCTAATGAT  
GTAGC GAATGCTGTGGGACCAAGTGTAGGAGCCGGTGCCTAACTC TAAAGCAAGCCGTTCTTATGCGAG  
CCGTC CAAAAA TTTT TTGGAGCAGTATTGTTAGGAGATC GAGT TATCGGCACCATA GAAAGTGGGCTGGT  
AGCTCCTTCCGGTCATGTGTTGTC ATCC CAAGACTATGTC CAAA GGAT GGCTGCAGCGCTTCTTGCCACT  
GGCGTGTGGTTGCAGATCGCTTC TTTT TGTGGAT GGCCAGTGTGACAACGCATGCTATTGTAGGCGCAG  
TGTTGGGCTTCGGTATC ATCCT TAAA GAGGAT GCGGTATCTACTG GAATTC TTGTGGCCGAGTG CAAA  
CAGCTGGTTAGCATCTCCATTATFGA GGATAC CAAA TTTT CTCATCTTCTCT TTTATTCG GAAA GCT  
ATCC TATA TAAAAA GGATCCCGTCTCTGCTATGGTGCATCGCGCCATTTTTA TCGGCGATCATTATT C  
AAA CATTAGGACTAGTCTTATCC T GAGTGGTGCAGTTGCTCCCGTTA TTTTCT TTTT TCCAGCGTTGCG  
TATTG CAAA TGG TTTA TCTCTT CAAA CTTT TTTT TTCACGATATGGG GAATACGCTTC TTTAAA CTGCG  
ATTC TTCTCAGGAAGTTCTTCTTGAACATTATTAGATCGGTTGTT ATCC AAAAGCACCGATTATGGG

GTAAGTATCTTATAGTTGAACGCATT CAAACTTACTTACAGATGATCATTGCATGC TTTATGTCT CAAAC  
GCAT GGATCC AATGATGTTGCTAATGCGATCGCTCCTGTTGCAGGTA TTTACCGGAC ACTCTATCC CCAA  
AGTTATTC TTCAAAGTTCTCTTAGTG TTTATGTC CAAAGGAGGACTAGGTTTAG CAAACGGAT TAGCAA  
CATGGGGCTGGCGTGTGATTGATACTATCGG GAAA AAAATTACA GAATTGACTC CATCACGAGGCT TTTC  
CGTAG GAATGAGT TCCGCTATCACTATAGCGCCGCTTCCTCCTTAGGATTC CCTATATCTACTACGCAT  
GTTGTTGTAGGAT CGGTATTGGGGAT TGGGTTCGCAAGAGG TTTACGAGCCATTAA CAAACGGAT CAT TA  
AAGATATTGTGC TTTCGTGG TTTA TTACAGTTCTGCTGGAGCGGCGC TTTC TATCGTATTTTT CAAATT  
ACTGCGCGCACTAT CAAATTAAGCGCA ACTCTCTATATGCAGACTATATGCAGAC TAAA AATGT CAAATC  
TGAGCG ATTC TTCATGTGGCACTGAGA TAAA GGCTT GAGT TTTC C CAAACTTAGGCCTATAA GAAA ATTT  
AGGTTAAGGAT CAGATAAGCAT GGA TAAA ATTATCGATAAGAGACC TTTC TCTTGAAGG GAAA AAGTACT  
AGTTCGTGTAGAT TTTA ATGTTCTTAT TAAA GATG GAAA GAT TTTA GATGATGTGCGT ATTC GTAGCGCA  
ATGCCTACG ATCC ATTATCT CAAAAA CAAGATGCAGCAGTCAT CAAA GTGAGCCA TTTAGGACGCCAA  
AGGGAGGCGTACAAA AAGAGGCAT ATTC ATTAGCTCCTATTGTTCTGTGCTAGAG GGGT ATTTA GGGCA  
TCATGTGCCTC TTTC TCCAGATTGTATAGGAGAAGTCGCGCGACAGGCGGTGCGCGAAC TTTC TCTGGT  
AGAGT TCTTCT TTTA GAGAAT GTACG TTTC CATAAGGGGGAAGAAC ATCCTGACGAGGATCC TAGT CAAA  
CTATTGAGCTTGCTGCTTATGCAGATT TTTA TGT GAAT GATGC TTTC GGGACATCTCATCGTAAGCATGC  
TTCTGTATATC GGGT GCCACA ACT ATTC CCTGACCGGGCAGCCGCAGGCTTCCTTATG GAAAAA GAAT TA  
GAAT T CAAAGGCCAGCATCTATTAGTTGAGCC TAAA CGTCC TTTC ACTGCTAT TTTA GGAGGCGC GAAAA  
TGCTTC GAAA ATAG GAGTAATCGAGGCGCTAC TTTC GTGCGT GGAT CATCTCGTATTAGCTGGGGGTAT  
GGGGTACACCTT TTTA AGGGCTAT GAAT CGCCAGGTAGGGAATTC ATTAGTGGAAG GAAT CAGGGATCCCT  
TTAGC GAAA AAAGTATTAGAGAAA GCTCAAGCTCTGG GGGT GAAG ATCCATCTTCCAGT GGAT GCGAAGG  
TCGC TAAA CAGTGTG ACTCTGGAGA GGAT TGGAGGGAGCTGTCTATACAGGAAG GAATCCCTGAA GGATT  
AGCAGGT CAAA ATATTGGGGCACAGACAATAGA ACTAT TTTC TAAGGTGATTC AG GAGTCGGCAACGATA  
T CAAA GAATGGTCTGTGCG GGGT ATACGAAGTCCCTCCT CAAA ATCAAGGAT CGAAGGCAATAGCACAAT  
GTCTCGCGAGCC ATTC TTCTGCTGTGACTGTGGTTGGGGGAGGCGATGCGGCTGCTGTAGTAGCTCTTGC  
AGGGT G TACTTACAGATCTCCACGTATCTACAGGGGGAGGCGCTTCCTTAGAATTC TTAGAAA AAGGT  
AGTCTTCCTGGTACG GAAA TACTATCTCCAGCTCAAAGC TAAA TATCTGCGTATGC ATTC CAAA TTAATG  
AAA AGCCCTGTTTA TCGGGGCTTTTT CAAATTTAAA AGGAGGTCT GAATTC GAGA TTTAGAAT GATTAAG  
ATCC CAAA CAAAAAGATA ACTCTTAACCCATTGTT TTTA ATTAATTAGAAA CTAAT TTTC GTTCGTTT  
AAA AACAGAACAATTGTT TTTC T TAAA AAGAAGTT TTTAAA ATTTA TAAAAATAGTTGGAAT TAAA AGT  
TATTGCTTCGGCGGAGGATTTA T GAGTATTC GACCTACTAATGG GAGT GAAA TGGATACCCGTCTATTA  
ATCC TTCTAACGATAATCAAGACGGTCTTGTGCAATCGACCTCTGGGCCTAATTACGGAGGCCATACGGT  
ATCTTCTCGAGGAGGATTTCAAG GGATATGCGTAC GAATAGCCGA TTTATTCCGTA ACTGTTTC TCTCGT  
AATAGAGGCACTACT ACTCCATCTCGACCTGTTATC ACTCAGGCAGATATTTA TCATCCGACTATT CAAA  
GACAAGGAGCTCAACCTATTGTCTCTACAGGAGATAA GAAA TTAGATAGCGCAATT ATTC AAGCAGACA  
ACGTGCGCAGAA TAAA CAGAC CAAA GCTACACAT ATTC CAAAGTAAGCTAGGTTCTATGGAGGGACAATCT  
CCTCAAGATTA TAAA GCTGGTGCATAGTGCCTAAGATTGATGCTG TTTACTC CAGGC GAAA C TACTG  
T GAGT AGCGAGCGGGAACGTCAAGCGTGCCTTAC GGGT CGGGAT CTCTGGGAACAGGCTGCAGGAGATCT  
TGCTACCAATGG GAAT ACAGATGGGCTTATGTTAATGGCTAACCTATCTGTGGGAGGGAAGCATGTGCCT  
GCAGGGCA TTTA AGAGAATACAT GAAT ACTG TAAA GGGTACG TTTA CTGATGAGAACGAGGCTACAGATC  
CTACGGTAGATGCCAT TTTAGAT TTTAGCAGCAAAAATCGATGCGACG GAATTC TCTAGTCTTGGTT CAGG  
GCCAGTC ATTC TTAATTATATAG GAAA TTGTGGACAAGTCGT TTTAGAAAACGAGAAGATGAACCAGCTT  
GT TTTA GAAGATCAAAATGGGCAAGATCCTCAACGTGTTCAAGATA ACTCAAAA GAGT TACAAAACTGT  
TAGAAA ATGCTC GAAA AACAGATCC T GAGT TATA TTTC CAAACACTA ACTGTCATAACTTCTTCTGT TTT  
CTTAGAC TAAA GAGAAGGTATACGGTGTTCGGTCC TTTC AACTATTAAGAGGAAGTAGTAGT GAGT AGCA  
TAAGCCCTATAGGGGG GAATTC TGGGCCAGAG GGAT TTTC TAGTGCATCTCGAGGCGATGAGATTGATGA  
TGTACCAGATAGTGAAGAGGGAGAGCTAGAAGAGCGG TTTC GGAT CATGCAGAGT CTATCATTACCGAG  
AGCTCG GAAACGCTG TTTC G TACTACTTCTTCATCAG GGGT CAGTGAAGATCTTCAGCAACACGTTAGCT  
TGGAG GAAT CTCCACGACAACGAGG TTTC CTTGGAC GGATCC GTGATGCAGTAGCTTCTA CAAA GAAGCG  
TCGTGTTGCACGAAG GAAT GAAA ACTATGATGT GAAA AAAGCAGAAGAGCAGCAAG GGAT TGTGCAATAT  
CTGCAG GGATTC GAAA ATGCCTGC TTTA AC GCGTGCCTATCGCCATCTCCGTGC TTTC AATTC TGCATGCT  
TACGTACGATTCGT GAGT TTTC GCTACCATT TTTC GTGCTTTA AG GGAT GCGTATTATCGACATTGTAC  
ACGTTCTGGGAT CAACT CAAATGGAGCTGA TAAA GACTCTTTA GAAGTCTTGTGTTGCGGTGGG CAAACTC

AAA CGTATGGCTACCTTACGCTCT CAAAACATGTCGGTGG GAAT TACGAAGATCGATTAG TAAA TAATG  
ATGCTCCGGTGACAGGTGCGGGGAGA ACTC TTGTTGATGATGCTGTAGACGATATT GAATCGAT TTTAAA  
TACGAGAACCAACTGGCCTCAACATGTCATGATA GGGT TTTTC TCGTGGTCTCGTTCAATTATGTGCG ACT  
CCTTATAATGCGACTTCTCAA GAATG TTTCAAGTCGATTGTTTCG TTTAGAAA AAGAAG ACCC TTCTTCAG  
ACT ATTC TCAAGC TTTA TTATTAGCAG GGATA ATAGATCGCTTGGCGGA GAAA GCCCCTATGGCTGCAA  
GTATGT CAAAGAT GCATTGCGTGTTCGAACTTCGGAGCTCATAGGAGA ACTCATT ATTC TCGA CAAA CTT  
CCTCCTGTATGGAAGGTTGGCCGCGGAGGCGT ATTC CCTCCTGT GAAT GAGCAGCTCGTTGTGCAAATTG  
TTAATGCAAACGTAGAACGATTGC ATTC CAC TTTTC GTCATGAGCCACAAGCTTA CAAA CGTATGATCGA  
AGG CAAA GTAACCAA TTTCTT TTTTC TTACCTAGCGAGGAAG ATCC TTCTTCGGTTGG GAAT ATCTAAGAA  
CAT TTTTC TAATAGGGAAGA GGATAAA TAGCGT GAAA TAATACTGATTATGTGAA GAAT AGGCAAAAAGAC  
C TAAA TCC TTATATGCTATTAG ATTC TCG TTTTC CCTACAGATTATTA TTTA CGTATCC TAGAAT TAGTCA  
TCC GGGAT GCTTCTTG TAAA TTGGTATATAACCGACGCCTGCATATGTTGGAGGCG ATCC CTCTTGATCA  
AAAAC TTTTC TACTGATCAAGAGGGG GAAT CAAGTAT TTTA CGAGAAGTGATTAGCGAGCTACTTGCGCAT  
TCTGGG GAAAGTTATGCGA TTTTC AGCTCAATTACTTGCCGTAATCGATA TTTTATTTAAA ACAAGAGCAAC  
CGTC GAATTC ATGGTTCGCTCGAATC TTTTC GGAAGAGAGAGCGGGCTA GAAA ACGACAAAACAATTAATAA  
GTTGCT CAAAT TAAA AAGT ATCC TATTT CAAA AACGCCAACGGCCTGTTAAGAAGGTC GAAT CGGTTGCC  
GATTC TAT TTTA CAGAGATCAAAAAG GAAAT TTTTC GTCTTGGGACGAT TTTA CACATGATGTGCAG ACTC  
AAAAATCTGGTAGG GAAA CAGACATGCCAGATTC ATTGCGAGGAC GAGTGGAAAGAAGATGCTGCTTCGCA  
AATGATCGTAGAGGTTCTGCTAGCCTT TTTA GATAATCAAGATATGTACCTCTCTGTAAG TTTTCGAAATT  
CTTC GAAATTT TTTA GAAGAGAAGGTGTTGTC GAAA AGGAGCTTGCTCCTCGGTAGTACAGGCAATTA  
AGAAGA TAAAAGACAAA TATTTA GTCAGCCCTGAGGA TTTTC CAAACG TTTA TCGGAGGCGTGATTACCGA  
ATCACTCTTTTC AAGAGGAAGATCAACTCGTTGTAGGATGTATGAT TTTTC TCTCAGGAAGGGAGAGA ACTT  
CAAAATTC TTTG GAAA GGATATCACAGACATACCCACATGATATGCTCTATACGCAAGCATT TTTA GCAG  
AAGTTGTGTTGCACGTGGTGCAACACCAC ATTC ATTTAAA TGCAAAGGT TAAA CTTACTTCCCCAGAGCA  
GGTAGGCAGTCTGTACAGCATTAGAGACCATAGTCTCAAGCTTGGGCAAGGATGATGC GAGT GTTATTA  
ATGCGCTGGTTGCTCGATTATCAT CAAAATGTGTATGCGCACC TAAA AGAAGAAA TTC TACGGTGCCCGC  
CACGACCGCCTT CAAA GCAAATG ATTC CCTCG GAAT CAGGAGATGGAAC TTTTC CGTAAGGAAGCTCGTTA  
GTCTGTCTGTAAGAAA GAGCAGATAGGACACACATCGATGTTGTGGTGGAGCGCTGGACAATACGCTCTT  
GCATAGTAGATGAGTTG TAAATGCAA TTTTC GGAGAGTGC CAAA GTCCAAAGA ACTGTAC TAAA TCTT TTT  
CTACAGCTGAAGGACTCCG TTTTC GTAGAAAAGTTGCCAACGATGTGCTAAGCGAAGGAT ATGTGTATCTAC  
AGGGAAGGTAT TTTTC TCCGTAAT TAAA TGCT TAAA AAAACAGAAGCTGTT TTTTC TGCCT ACTC CTGGAAGA  
GCTGTTA ATTC TGGAAGGGTGTGAGGAGGTTCTTGATGATAACG ATCC ACAAGAAT ATGTGATAGAGCAT  
GAAT ATACGCAGC CAAA CGTTCTCCTA ATCC ACAAGGAGCAAT GAGTGAATAGA TTTTC AGAAGGAGCCAG  
CATACTCATAGATTGTGCATCTGGTGC TTTA GCAAAGAGAGAGG GAGTGACAGAGTTTCACAGC CAAA TCT  
GTC GAA TTTTC CAGA TAAA AGGATAGCAATGAG GAGTT TAAA GG GAG CAAACC ATCTGT TAAA GAAGCG  
CAGGAT TAGG GAAA AGACGG TTTAAA GTAGAGATAA TAAATGCACGCTTAGCTGTACATTTA GTGACTT  
CATAAGAGGTTAT TTTTC CTATACAAAAC TTGCT GAAA ATTTTC CCTAAGAC ATTC TCAGTGACTTC GGAT  
CCAGA TAAAT TGCCATAGA GAAT GCAAAGCTTGTCGGAGATC TAAA GCGATAC ATTC ATTAGGAAGATGTT  
CTG TAAA TCCATTC AACGCAGCTGT TAGGCATGTA TAAA CG GAAT GAAGCAAGCTGTGATGGCGCGCAGA  
GACT TAAA AAGATCTTAGAAGAT TTTTC CTAAGTGCCTAGTATTGAGCCATT CAAA CAAAGCTTGT TTTAAT  
TCCAGCAATCC TTCTCCAGT TTTA GCAGATACA GAAACAACTG GAAA GGAACCTCTA CAAA AGGAGGAG  
ATACGATATCACACTT ATTC CAAAG TAAA ATGGTGGCT CAAA ATACAAAATAGTAGG GAATTC TGGAAG  
TGGCTGCGACGC ATCC ACAACCC AGAGAATTC CTCTGCTTG ACTC ATGGCTTCTCGGGCACGAGCAATC  
CCTTC TTTTC TCAACCAAAT TTTTC TG TTTTC TCTTAG ACCCGCAGAAT CAATGAGACGAAGATT TTTTC CCTT  
GCAAGACCCAGT TTTTC TTC TAAA ATATCACGAGT TGTCCTG GAAT ATCAGTGACAATCGCTCGGTTTT C  
AAA AGT GAGCGCA TTTA GGATGGAT GAT TTTTC CTGCA CAAA GAAGCCCTGC TAAA ACAATACTC GTTCTT  
TGAGCCAGACGTTGTCCTTCATCAAAACTAGAAA GAAGCTCGTCTGTGATAGATAGAGCTTCCATA ATTC  
GATG TTTA GGGAGC GAAT CTT CAG TTTTC TATATCTTCTTCAGGGAAGTCTGCTAAGACTTCTATATAAGC  
AAGAGCTTCTATAAT TAAA GAGGAGATAGAGGAGATCGCTTGAGAAGTATGCCCTTG GAAT TGAT CAAA  
GCTATAC GAAA AGCATCGATATTATCAGCAGCGATTA ACTGTTGTATGGCTTCCGCTT GAAT AAGATCGA  
T TTTTC CATT CAAAAATGCACGTTGC GAAA ATTC ACCAGGAAGTGTGCACGAGCTCCCTCCGCTAATAG  
AGCG TTTA CAA CAAA GGAGCAAAGTAACTCCATGGCATT GAAA TTC TACGATGTCTCTCCCGT G  
AAA GATCGCGGGGCGCGCATCACTAAGACTAACGCTTGATCAATACAGACAGCATTATG GGAT ACGGTGC

CTAGGTGGGCTGTATGTGATGCGTAACCCGCAATGTTGCCAGAAA AAATACGATCA GAAATAGAAA TAGC  
ATCCGGTCCGGAGACGCGAACAATAGCAATACTTCTTCTCTGGAGGAGTTGCAATAGCTGTGATCGTA  
TCAATTCGAAGCATGGGTAGCAGCCTTTAGGC TAAATAAAGTGCTGAAAAGGAAA TGATTATACTCAAAG  
ATGATCTTTC TAAGCAAGAAGGGCTAATCGAAGAAA GCGGGTGTTCATA TAAA AATT TTTAAATAAAA  
GAAGCTTTT TTTAGGAGTTCGGTATCCTGAAA GGGCAAATGTT CAAAAGAAA GAGAAA CTTC TTTA TAGT  
TC TTTA TGC CAAA TGTG TAAA AGGCTTCTATAAGAAGAGCAAATCAGCCGCTTGCAGAGCAGGAGATAAG  
CATGGCAGCGCGG GAAA TGTATATGTTAATCGC GAAA CAGGGAAGGTAGAACAGGAACGTATCATCTGT  
TCTTCTCTGG TAAA GTTT TTTA TT GAAA CGA GAAT AGGGAGAGCTCTGT ACTC TGT TTTATGTAA GAATA  
GCCTGT TTTCCCGTATCGTAGGCTGGTGTCAAAGACTGC GAGT GACGCGATAT TTTA T TAAA CC TTTCCGT  
TACAAAATATCGTA CAAA CATAGAAGA GAGT GCTTCTCCTCTGCACGACTACGCGTCA TTTA ATGATTTT  
CAAA TAC GAAA ACTC AAACCAGATGCTCGACCTATCTGCCAGGGAGA GGAT ATCTGTGTGACTC CTGCTG  
ATGGTGCCTATCTTGT TTTCCCTTCCATGGCAGATCT ATCC TTG TTTA CCA T TAAA AATAAGCCGT TTTCC  
TTTAGAAA GTTT TTTA GGGGATCC GCAATTGGCTCACCAATATGCGCAAGG GAGT ATGGCAATCGCTCGA  
TTAGCTCCT CAAA ATTACCATCGCTTCCAC TTTCC TATAGC GGGT ATTGCTGAGGCACCGCGCCGTATCA  
ACGGCCATCTTT TTTCC TATTCATCC TCTTATGCTTAAGCGGAAT TTTCC GAAGTG TTTA CGGAGAA TAAA CG  
CGAAA TTACCATAATTACGTCAAAA GAG CAAA GTGAGGTTGCC TACGTGGAAGTAGGGGCGT TAAA TGTG  
GGT TCT ATCC ACCAAACGT TTTCC TCCGGTAGTTATGT GAAA AAAGGTGCC GAAA AAGGTTTT CAAA CT  
AAA GAGGATCGACTGTTGTTCTATTA TTTCCAGCCCAAC GGAT TATC CAAA ATGCAGATCTAGTTGGTTA  
TTCTGCTCAGGG TTTAGAAACCC GGTGTC GAAT GGGACAATCGTTAG GAAA ACG TTTCC TCTTCA TAAAA  
TAAA GACT TAAA ACGTTTTT CAAA GTATTGCAAGAGAGAGAAA ACTC AGAAGTTGTGCATTATGTGGCTA  
ATCGTAGCATGGAC ACTC TTGGCTTGT TAGCGATGGC TTTA GTC TTTAAA GCTTATAGGCATGTTATCA  
GCTTCCGAGCTACGT GAAT CAAGTGATGCG GGAT GTGCGCTT GAGCGTAGA TTTAAA AAGT GGCGGT  
CGCA GAAA TGCGCTTGCCCCG ATCC T GAAA AAACGTCAATATCGACG TAAA TAT TTTATTCGAATATATC  
CGTATTC TTCGAGAGCTCGAACGT CAAA AAGAAGCT GAAA AGCT CAAA GGAGAAGCTAAGAAAT TGAAT  
TAGCAGGCGCCATTT TTTCC TTAGAGGTTGCACATAAGGCT TTTCC CGGCATGGCGCCTA TAAA GAGGCTGC  
ACATGCTT TTTCC TCTTC TTTCC GCTGAGCTTATGGCGAGCGAGAGGTCGCTCGCTACACCAT TTTCC TCTG  
GTATATCTTGGAGAAGTAGATGCTGCTTGT C GGAT CATTGAACCAT GGAT TGGTCCACTTGTCCACCAAG  
AAGTC TTTA ATTAGCGTAGGACATATCTAT CAAA CGACGAAGCGCTATGCAGATGCTATCGA TTTCC TATCG  
ACGTGCACGGTCTT TAGGATCTTGCCCTATCGATGT CAAA TACAAC TTAGCAC ATTC CAAA CGTA CAAA C  
GGCAGTATGTCGATGCTGGATGCTC TTTA GAGAGCT TTTA GGGGATCCGG TTTATAAAGACGAAGCGA  
TG TTTA ATATCGG TTTA TGTGAGCAAAAATTAGG GAATTC GAAA AAGGCTCTGCTGATCTATCAAAAATAG  
TGAGTTAT GGGT TCGCGGAGATGC CAAA ATGATGCGGTATGCAGCTCTTGC GCGGC GGAT CAGCAAGAT  
TATCAGCTCGCAGACTGCTGGACATTAGC TTTCC GTTGTCAAAGTTATGCTGATGATTG GAAT TGCT  
GTGTTCAATTAGG TTTA GCATTATGCCA TTTAAAAGAAA TATGCCGAGGCTGAGAAGGTATA TTTA AAGT  
GATTC AAAAGACTC CGGAT TG CAAA GTTGCTTG TAAA GCAC TGGCTTGGCTCGCAG GAGT CGGACATGCG  
ACGATGA TTTCC TGCTCGAGAAG GAAT AGCTTATGCTAAGCGAGCGCTGCAGATCAAACGATCTCCGGAAG  
TACTCGAGT TATT GAGT GCTTGTGAAGCTCGAGAAGGTAAT CAAA ATGTTGCTTATGAT ATTC AGGCTAT  
TTTA GCCGAGCGAGATACGACGGCGAAGGAACGTGAGCGACGGTCACAGAT CAAA AA GAATTTA CGACAG  
AAA CTTCTATAGACCAACAGCATATAGTAGAGG TTTCTTTA CTGCTAGCTGCCTAGCCTT TTTCC TCTCT  
TGTAAGTAAGCCCAATATAAGATCTTAGCCCTCGTATTGCTC GAGT GCTT CAAA T TTTCTT TTTCC TCTAG  
GAAA GTCTAGAAT GTGCCT GAAT GCAC GGAT TTTCC TTTCC TCTC GAGT AGCC TTTCC CTGAGAGAG CAAA T  
GCG TAAA AAGATAATTATCAAAA GAAA TAGAAA AGAACCATCC TTGTTGTATAGGCGCC TTTAAA TAAG  
AGAGTAGGTTCCG TTTCC AAGAGCATGTATTGAACATATGAT GGA TTTCC CTTAAGCGTTT TTTCC GGATCCTC  
CCAAGAGA GAAT AT TAAA ACGATTC CAGAAGTTGGTTGAAGAGGTTAATGCTTGCATGAGAAA TTTCC TCG  
TCCCTGTCTGACGACGAGCTTCGC GAAA AGACCC CTCAATTGAAGCAAAGATATCAAGACGGG GAGT CAT  
TAGA TAAA CTTCTCCAGAGGCTTATG GAGT TGT TAAGAACGTATGCCGGCG CAAA GCAGGA ACTC CGGT  
GGAGGTATCTGGGT ATCATCAGCAGTG GGAT ATGGTTCCCTACGATGTGCAG ATTC TGGGTGCTATCGCT  
ATGCA TAAA GGC TTTA TCACCGAGATGCAAACCGGGGAAG GAAA GACATTAAGTGCAGTATGCCGCTGT  
A TTTAAA TGCTTTA ACAG GAAA GCCTGTTCACTCGTTACGGT GAAT GATTA TTTA GCTCAACGAGATTG  
TGAGTGGGTAGGTTCTGTGTTGCGTTGGTTA GGAT TGACGACCG GGGT TTTA GTC TCCGGGAGCCCA  
GAGAAGCG TAAA GCTA TTTA TCAGTGTGATGTGCTATACGGAACAGCTTCG GAA CAAA GGT TCGATTATC  
TTCCG GGATAATTC GATCGCCACAA GAAA AGAAGAGCAAGTAGGTCGCGGTT TTTA CTTCCGCTATTATTGA  
CGAGATAG ATTC GGTGTTGATTGATGAGGCTCGA ACTC ACTC ATTATCTCCGGGCCAGGAGAAA AACAT

AATCCCGTGTATCAAAATTAAGATCGCGTAGCGGAATTAGTGTAATTCCAAAGGAAAATGTGCAACC  
ATATTGCTATTGAAGCTAGAAAGGTCTTGGATCCTTTTTTAGGAACCGATGTGCTTCCTAAAGGATAAAA  
GGTTATGGAGGCAATCTCTGAAGCTTGTGCGAGCCTTATGGTTAGTTAGCAAAGGAATGCCGCTCAACAGA  
GTGTTGCGTCGTGTACGAGAGCATCCAGATCTTCGTGCTATGATCGATAAAATGGATGTGTTCTATCATG  
CCGAACAAAAATAAGAGGAATGTCTAGAGAAGCTCTCTCTCTATATATTGTAGTCGATGAACACAATAA  
TGATCAAAAGTTAACAGACAAAGGAATGTTGCAGTGGATTGAGAAGATCGGTGGTGTGTCAGAAGACCAA  
ATGATGATGGATATGGGGCATGAATATGCTCTGATTGAAGAAGATGCAACGCATTCACCAGCAGATAAGT  
ATAATCGTAAGATAGCTGATTCGAGAAAGGATACGCAAAGAAAGCCGAGCTCATGGGCTACGGCAGCT  
GTTAAGAGCACACTTATTGATGGAAGAGACATCGATTATATTGTGCGCGATGATCAGATCGTGATCATC  
GATGAACATACAGGACGCCCGCAACCAGGACGTCGTTTTCAGAAAGGATTACATCAAGCGATTGAAGCGA  
AGGAACATGTAACGATCCGTAAGAGTTCGAGACCTTCGCGACAGTTACCTTGCAGAACTTTTCAGATT  
ATATGAAAATTAGCAGGGATGACAGGAACCGCAATCACCGAATCTCGAGAGTTAAGGAAATTTATAGT  
CTCTATGTGCTGCAAGTCCCTACAATTAAGCCTTGTGCGTATAGATCATAATGATGCCTTTTATATGA  
CAGAGCGTGAGAAGTATCAGGCTATTGTTGCTGAGATCAATTCGCGCATCGTTCCGAAAAGCCGATTCT  
GATCGGGACAGAATCGGTGGAGGTGTCTGAGAACTTTCCTCGTATCAAAAGCCGAAAATCGTATTAATCAT  
ACTGTAATCAATGCATAAAACCATGCGCAAGAAGCGAAAATTATCGCAGGAGCTGAAAAGGTTGGCGCGG  
TTACGTTGGCTACGAATATGGCTGGTAGAGGGACAGACATCAAGCTGGATGAAGAGGCTGTGGCTGCTGG  
AGGACTGTATGTTATCGGTACGTCACGACATCAATCTCGACGATTGACAGACAGCTGCGTGGTCTGTTGT  
GCACGTTTAGGAGATCCGTTGGTGTGCGAAAATTCCTCCATTCAGAAAGATAGATTGATGAGGCTTCAA  
CCTCTCCAAAATCAATACATTGATTCGCCAATTCGTCCTCCAGAAGGTGAGGCGATGTCGGATCCAT  
GCAAAATCGATTGATTAAAACAGCGCAAAGCGTGTGAAGGACGTAACATAACCATACGTAAGCATAAC  
TTAGAGTATGATGACGTCATGAATAAACACGACAAACCAATTTACGCCTCCGTAATGATGTACTTCATG  
CTGAAGACTTGCAAAATGTTGCTAAAAGAGCAGATAGAACATGTTGCTTTAGCCCTTAGCCTTTCGATTT  
AAAAGATGCTCATGCGGATCATTGCTCAAACTAAGATAGAAAGAGTGGTTGAGTTATTCGTTCCCTGTG  
AAGCTAGATGATCAGAAAATCCGTCGACTCGGTGATGTAGATGCGGTAGCAGACTACATAGGGGATTTAT  
TAATAGAAGCCTTCGATGTTAAGTTCTCTGCGATGCTTGTGAGTTTACAGAGATTATTGGGTGAGCAGC  
AAATGCTCAGGGGATATGTAATGACATTCCTCGTTCCGTGATTAATTCATATCGATGAGGAATGAAA  
GTGCATCTTGTAGATATGGACTTATTACGTTCTGAAGTAGGACTGCGTTCGTTGGCAAAGATCCCTT  
TAATCGAATTTAAGAATGAGTCTTCCCTGCTGCAAAAGGGCTGATTCGCGATATTCGCATTGCTATAGT  
GAAACACTTATTCGCTTTAGAATTATCATTAAACACGTAGCGATAGACCAGATAATGCTATCCCAACAGTA  
GCCACGGCTTTCATAATCATGACAATTTTCGCCCTATGGAGTTGACAATTGTCGGTGAGGAAGAAAGT  
CGTAAGAGGCTTGTCAAACCTAGGCAATCTCCTTAATTGGAGATTGCCTTTTCATTTAGAGAGTTCGTTA  
GGATTCGAAAAGAGCTAGGGTGTATTGTTATATGAAAGTAGACCAATTTAGACCAGGATTCCTCCGTCATG  
GTGACGAATCCAGAAAGAGCGATGATTATCACCTATTAAGAAATGTACACGATGTTCCCAATTCATGCG  
GTCATGCAAATGATGATATTGTCTAAGTTGGCATCAAGGCTGGGAAGTCTCAGGAGCATGAATCAGCT  
TTTCACATTAGTGGTGGTAGCAAATCTGGCTGAAGAAGTTGATCGCAGTCATATTCGGCTGTAGTGAT  
CTTTTAGGAGGAATATATAACCCCTTCCCAACAACCTTGGTAATAGCCGCAGTATAGGCATAATTA  
TGATCACTAATATAGAATGACGAATCGCACCAATTAATGGACTTCCCTAATAACAATCAGTAAGTCAC  
CATTTTCGATCATCTTCTCTATATACACCCCTGTATCATGGTAGGCATCTAGAGGTCAAACTCTTATC  
AGACTCGCAGATAAGATGATCTAGTTCATTATCGGGCTCGAATTCATCATAGGGTTCGTAGTGCATAGGG  
ATTAATCTCCAAAGAAATAACTAATTTTAGTTTTATTATTTCTAAATAAAGATTTTATTTTPTTACA  
AATTAACAAAATTTCTTGCAGGTCAAACCAATATTCATAATCAAATGGAACCTATATAAATTAAG  
CTGCTTTTAAAGTGTTTTTTAAATACAACCTCGTAAGGTTTCGTCAGCAGACTATTGGAATGATAAAG  
CAAGAAAGTAAATGGTGTGTCGTCGTTATGAATCGCATAGTAGATGCGTAAACGCAACCATTAATGACC  
TGCAGGATGGTGTCAAAACATAGCAGAAGCTAATACCTTGTAACTAAGGAAGTCGAGAGTCAAACTCGTTG  
CAATAGTATAGATATCATCAATAGCAAAAAGACAAAATAACAGATTGCGGCGTTGCTTGGCTGAAATACA  
AAGTATGTGCGCTTGACCTATATAGGGATCCATTPTTCGCAAGCTTGAACATAATGTTCCATGCGAACA  
CCAAACATTAAGTCCCAATTTATTTACGAGAATCACATGAGGTTTPTTATATCTCGCAATCATAGATAGAA  
TCCGCTTATCTTGATAGGAGAGCTGCTGGGTGCGATCGATCACTAATAGGCAAATGTCTGTTCTGAAAT  
GGCTTTTTCGTTGAGAGAAGACATCCATTCACAGAGTTPTTATGCTCTTAGTTTTCPTAATCCG  
GCAGTATCTATAAAGACGTTTCPTTATTGTTATGCGTATAGGCAACATCGATGTTGTCTCGTGTAGTCC  
CTGGAGAAATATCCGTTATACAGCGCTCCTCCTAAGAAGAGCATTGATAATGGAGGATTTCCCTACATT  
GGGATGCCCAATCAACGCTACCPTTAACGGGCGGTCTACAGGGGCTGGCGTCCGCTGCGCAACGAGC



TCTTCCAGGAAAGAAGCTTCTTCTTGTGATAGGGATTCATTTTCAAAAAGAGTTTCATCAGCAAAGGCAT  
GCAAAGATATAGCAGCCTCTTCCAGAGGGGAGCTCGTCTTCTTGTACAACATCTTGTCTTCTACAGAAGG  
TACAGGGATCTGCGGATCTGACGGATGCGTTCCAAAGATAAATCAATATGCTTATCATGGCTAGCCGAT  
GTGGCAATCATATCAGAGATTCCTCAATCCAATAAATTCATGAATGCGCTGTAAATCCGCTGGGAATCCG  
CTTTATTCATAACAAAGAATCAAAGGCTTCTTCAACGGCAGGAGACGCTTAGCCAGCTCTTCATCTTGCAA  
AGTGATAACCATCAGGATATCTACTACAAGCAGCAGAACAGAGGCTTCCCTCTGCTGCTGCATAAAGCTTGT  
TGATGAACAAAATCAAAGAATCGGTGCGTAGACTCTTGGTCTACGCCCCAGTATCGATAACATGGATAA  
TAGAATCCAGGCTCGAATTTCTCCATACAAACGATCTCGGTAGTTCCCTTCTTGAAGTTTACAATCGC  
ATAAAGAGCTTACATAAGCGGTTGAAGAGAGAAGACTTCCCTACATTGGGTCTTCCATAAATAGCAATA  
CGCATAAAAGGCTCTATTAATCCAAAGTTGAATAATTAGGAAAGAAATGATAAAGAGTAAAAAATTAAT  
CTAAAAGAACAAAAATAAATCTATTTCAAGATGTTTATCGGAGAAGAGAGTTAATTTCCAAAATCCCTTGC  
TCTTCAGTAGAGATAAATTTTTCCTCAATCCGAGCACTCGTGTCTATGGATAGCGCTTCAGCTTCTCT  
GAGTAGTTCCCTAGTAACCGACCCGGAGTAATTCCTTCCGATGAGATCTTGCGCCAAAACAAGAGGA  
GCTCCTGACTGGATTCCTTCTATGAATGCTGCAAGACGTGTTTTTAGGTCATGTATACGAGCAAATAA  
GTTCTTGCTCGTCTGGTGAGCGCTGCATCGACAGGAAGAGCGAAAAGCAGCAAAGAGGAGGTCTCTGAAGC  
AAAAAATGTGCCCAAAAAGCTTGTTCATCAACAAAAGATAAATAATGAGGAAGAGCTGCGTACCAGTCT  
TCCAATAGTTTAAGCTCAAAATGGATACGCGTAAGCGAGAGAAGGCTTCTAGAGCTTTTCTTGTCTA  
CTTCTCGAATAAAGGTAGCAACAAAGCGATCTCTGGAATCTGGAATCATGGATTTCAAAATGCAAAAGC  
AATTGCAGAGCGTAAATCCACTCGAGGATACTTTTAATTCAGGGAATAGGATAGGAAGCACTTTTAAC  
AAAGTAAGTAAGTCAAGACTCGTAAGGGGCTGTCCGAGCATTCTTCAAAAGCTCTTGCCAAATTCCTT  
CAGGAGCGACAGAAACAAAGTAAGGAAGGCAGCTCCTTAATGATGGCTTGTTCGGCAACCGGATCTAAAGC  
AAAGCCTAATGTGCGCAGCAAACGAATGGCTCTTAGGATACGGAGTTTATCCCTAGGAATCCAAATCAA  
AGATGGCCAATGGCCCAGATGATTTTCTTTCTAAGTCCGCTCTACCTTCTACTAAGTCAATAGTTTCT  
CTTCAAAGGGATCATAGTACATGCCATTGATGGTAAATATCCCTACGAATAGCATCGTCTTTTCATCGATGC  
AAAGACAATCTGATTAGGATGTCGACCGTCTTATAATCTTATCGCTACGAAAAGTAGCGACTTCAAT  
AACTGCCATTCTCCCTTACAGCGATAATGCCGAAAGCCGCGCCAATAAGAAAGAGTATCCGGGAAGATTG  
TAGTGACAATAGTAGGAGAAGCATTAGTTGCTATGTCTACCTCTTCGATGGGGCTCCTAAGAGCATGTC  
TCGAACGCTCCACCAACGAAATACGCTTGATACCCAGCATTGCGTAATTTTCGAACAATCTTTCAACA  
ACTTCCAATGTGGACTGGGTCTGCAATTCCTAAAAGTTAAGCAATCGCCTCTGGTGAATTTCTGAATAAT  
GACCGGAGGTTTATCAAAATGTGATAGTGTCTTCTCTATACGGATGGCTTCTACCGTAGGGTTCGGAAGG  
ATCTCGAACATAAGATCTCTGAGAAGATTCCTAAGATCATTCCTAAGGCTCGGGCTCCGGTCAAAGCTT  
GTTTAGCTTCAAAAGCTATAGCAATAAGAGCCTCTTTTTCGAAGATTAACCTGACGTTTTCTTCTTCAA  
TAACTCTGTGTATTGCTTAACAATCGCGTTAGCTGGCTCCGTAAGAATCTCAACAAGCTCATCAAGAGTG  
AGTCTTTCACAGTTGACAATAAATTAACCGCCCGATAAATTCGGAATCATTCCAAAGTGATCAAGT  
CTTCTGTTTCTACTCAAAAGTAGATGATCGGATTCGTTACAGCCAGATCGGTTTCTTCGGAGAAGCC  
TATCGTTGTTCTTCCGAGTCTTTAGCAATGATTTATCCAGGTTAACAAAAGCTCCCCCACAATGAAG  
AGAATATTCCTCGTATTTACACGAATATACTCTTGGTTAGGATGCCTTCTCTCCCTTAGGAGGGATAC  
AAAACAAGTTCCTTCGATGATTTTCAAAGGGCTTGTGGACGCCCTTCTCCAAGAAATCTCAGTAAT  
GGAAAATAGCAGTTGTGCGACCAATTTATCGATCTCATCAATGTAAATAATGCCTCGCTCTGCTCGC  
GCTACATCATAATCTGCTGCTTGCAAAAGCCGTAACAATATTTTCTACATCTTCTCCGACATAACCGG  
CTTCAGTTAAGGTAGTCCGCTCTGCAATTTAAAATGGGACATCTAAAATCTTAGCTAATGTTTTAGCGAT  
TAAAATTTTCCAGATCCCTGTTGGCCCTAGTAATAATACGTTGGATTTCCATAACTCACTTGTTATCC  
TGCATAAGAGCACGGATACGCTTATAGTGGTTATAGACGGCAACCAAAATCGTTTTTTCGCGGCTCTT  
GTCCAATGACATAAGAGTCGATGTGGCGCAAAATTTCTTTAGGGTTAACACTCTCAGACTTGTGGAGA  
GCTTGTGGAAGATGTTGCGATCTCCTGTGTTGCGGGAGCTGGAGTTTATCCAGGATCCAGAACACAGC  
TTAATAACAATAGTCGCAAATGTACACGGATGGACCAGCGATTAGCTTCTCAACATCTTCTCAGATCGTC  
CACAAAAGAACAGACCCGAAGATTTTTTCAAAATCATAACAATTCCTAAGACGCAATACTCTTATCTCA  
AATCTCTTTAGCAGAAGAGATCACTTTATCAATTAACCCATAAGCAATGCTTCTTCTGCTCCCAATAAG  
AAGTCTCTCTCTGAGTCTTCAATGATTTTTCCTACTGATTGGCCAGTGCATTCGCAAGAAATATTGGAGA  
GGTGTTTTTCATGTAAAAATTCAGCAGCTTGCAGTTGAATGTCGTCAGAGGTCCCAATGATCCCTCC  
TGAAGGCTGGTGAATCATCATGCGGCTATGGGTAGGGCATAACGTTTCCCCCAAAATCCCTGCAGATAAT  
AAAAGCGCTCCCATAGAAGCGGCTTGTCCAATGCAGTACGTAATTCATCACAGCCTAGAAAAGAAATGG  
TGTCGTAATTCGCTAACCTGCTGTGATATATCCCTGGAGAGTTGATGAAAACAATAATATCCCTTAGT

AGGATCTTCAGACATAAGAAATAGAAGCTGGGCTATGACCGTATTAGCCAAAGGCTCTGTAAATTCCTTGCCAAATCATGACTATGCGGTCATTCAGTAGCCGAGAAATAAATATCCATGGCTCGTTCGCCGCGACCGGTGTCTTCAACAACGTATGGTACCAACGTCATATGTGTGCTTCCCTCTCAAATCAAAAATTACAGGTGTGCTTACGTTATGGCTACTCTTGACCCCTAGAAAAGAAAGATCCATATCTAATTCAAAATACACCTACGCATCAAATGATGAATTCATGTTTAAGTGTCTCTTGGGTCAAGCGTATTCCTGCGATCAAAATTAAGAAGGAACAACCTCTAAAATCTTTTTCCTCGGATGAAATGCTTCAATTCGTTTACGATAAGTCAATCGATCACGAGCAACAAAGAACTACTCTGGATCATCTCATTAGAAATATCTCAAAGAGGGTAGCCTCCAAAACGTTCTCTGGAGCAACATCCATCATATATGAGGTCTTCTCTAGAAAATAGACAAGCCTTATTCGAGAACTTCAAAAGTTAAGAACAGAAGCTTACAGCCTTCCCTTGCATCTGCTTTCGCTTCTCTAGTAAAGCTTGTTCTCTCTAGCTCGGAATCGGAGCAATAAAAACATAACGAGCGTTTACAGTTTTCCTAGAGAGAAGTTCTTCGCTCTCGCAATAAGCTCTCTGGTAAATCAAAAATCTATAAGCTGAGCTAAAGCATCCCTCTGCATCAGAGAAACGTTCAAAAGTGCTGAGCTTCTTTAGCTTGATTTCTAATTGTATGCGAAGCTTATTCCTCAGATCTTCCAAAGATTCCTGCTGTAGTTCTCGAGCTTATTCATCGTCCAATTCGAGAGATGAAATTCATCACAGCGTTGACAGTGAAGGTAAGAAGATCTCCGTTTAGGAAAGGATGAATATCTTCAGAACCATTCCTCTCTACACGATGCCCTGTAGACAGTTCAAAGAACTAGCTTTTAAAGAATCTGTTCATATCCCTTTCGCTAATCAAAAAATATTTTATTTCAAAAATAGCTACTGGAGTGAATTCATCACACCCCTTTTAGAGACATATAGAGATAAGGAGATAAAGTCTCCTTCTTGGGAAGGTCTCGTGACAGGTGTCAAAGTTGCAAAAAAGTAAGCAACATTTTAAACCCATTCCTAAAATCTTCTCAGAGATCTCAAACACAGGTTCAAGGATCAGGCAAGCTTAACTGCTCCCATGGTAGAGAAGGAATGACAGGGAATGCTTCGTACAGGAAAGAAAAGAGAGCCTCCGTTTACCGGTGCAAGTATCAATGCCGAGGAGCGCACAGCTCAAAGAGATAAAGGTATTCATCACACAAAATGAAAGAGCTTCAAAGAGGCTCTAAGGAACAAACGTCGAGGTTCTGCTCCACTTGGGTTGAATAGCGAGACTCAACAATATTATCAGGTGCTTTTCCAAACGAAATCCCTGGTAAACAACATTTTTCAAACGGTCTTCAGAGCTTCTTATGACACTCAAATGTGACCAAGGGATTAGCTTGGACTCAAACAGACACAACACAACCAGCATTTTCTTCTATATTTATAGAAAACAAATCATTAGAAAATCTCGTGAAGACACAGAATACCCAAAGTAAGTTATCCGGGAAAAGAGAAGCGGGTGATGAGGCTTGAACCTCACGACCTTACGTTGGCAACGTGGCGCTCTACCCTGAGCTACACCCGCGAGAAGAGGAGCATTCATAGATAATCTGGGGAGTTTTCGCAATCCAAAATTGTAGGTTTTCAAAAAACGTTGAAAAAGGTTTCAAAGAAGGTGAAGAGTGGTAAAAAGAAATTTGGACTGCAACAGCTTTTAAAGGGGAAAATAGAGGAAGAAGAGCGTCAAATTTTATTGATTTAGCGGAAGTAAAAGGTACAAGTAACAGGTCTGTCAACCCCTATGTTTAGAGGAGAAATGCTTAATTTTCGTAATTAAGAAGAGATTTTACAGCTAACATACTGCAAGATGAAAAGAGTTACAACCTCAAGGAGCTGTGGTTAGTGCCAAAATCTTATCTATGAATGGCGAGACGGTGTGATTAGCGCACAAATTCGTGGTGTACGATAACGTTTACGAGTGCAAAATGAAGTAGATCGAGCGGAATCTGACACCGTGGATTCCAACTGCGATTGTTCTTACAATTACGACTGTCAGCATGTGCTTGCCTTGTATTTTACTTAGAGCAGTACTTCAATGAAATGGTAGTTACCTACTCTAAGGAAGCAGATCTTTCCTTCTAATGAGGAGGTGAGTAAGGAATACAAGAGACTCAAATCGTTGCAGCGATTCGAGAGGAGGAACGAAGAGATCGGGAACACCAAAAAGAAATCCCTTCGGGAATACAATCATGCTGCTAATGTTTTAAGTAAAATCCCTTCTCTTGCCTTAGATGAGTATTCGAGAAAATAGTGCAGAAATTATTAAGTCTGCTTTCTGACTCAGCATCAAAGGATGATTTATCCAAAATGTTGAAATCAATGGCAGAAAGCGGAGGCTCTCAATTAGGAGAGAGAATGTTCAGGGGATCTCAAATGGAAATTAAGAACCAAAACAAAGTCAGTTTCCTCCGCTAAGATGAAGTTCCACTTAGATTACAAAATACGCCATACAAAGCGTTATTAATGAAACCAAAATTTGTTGTGGATGAAGAGGAATACAGCCTGAGCAAGCAGTTCTCTGGAATCCAATATCCCTGGATATTCATAAGAATGTTATACCAATTCCTTGGCCGAGATTAAGCGTGCTCAATTAAGAACTCAAACAGGGTTGCGTGATATAGCTATCCCGGAAGCTCTGAAAATTCCTAAAACGAGAACGCCAAACAGTATTCGAAATTTATGCGGAATGTCCAATGTGCGAGGCTTTAAACGTTTTCAGTACATTGCCATATACAGAGGAATACAAGGCGCAAATGATATTAGCTACAAAGATGGAGAACTCGAGGCGAGACTCTTTTCCTTACGACGGGCAAAAATTCCTGCAACTTCCTTCCAAACAGTATCAAGAAGTTTCGACTCAAATTCGTCCTGATGGATTTTACGTCGGAACCTAGTTGAAGAGAAAAATTCAGAAAGGATTTTCTGGCAAATCTATGACGAGCGCGATGGAGCTTTTCATGTAAGTGAAGAAGATTCGAAATTTATGACAGAGACGATCCCTAATAACCAGCATCGCATCATAATTAATTGTCCAGAACTCTGCTTGATCAGTTTATTTATGATGAAACTGTCCAAATCTCATTTTCGAGCAGGAGAGGATATCAACTACTAC

GAAGCGGAGTTAAAAGTTCATGGCTTGCTGAAAAGGCATCAGTTTAGACTTACCAAGGATGTGTGCAGTG  
CGAAGAAGCGCTTCTTAAGAGTTGCCAAAAAGGGCGGTCAATTGAAAAGAGCGCGGCGAGGAAAAGCTTC  
TGCTTCGAAACTTCCATGCATCCTTGTCTCGATTTAGAAAAAATCGCACCTGTTATTCAAATTTTCAAT  
GAAAATTGGGTCCAAGTCTAGATGATCAAAATTGAGAAATGTCCTTTATGGAGTCTATCTGGAAATTCGC  
CGGAATCTTTCAAAGATCTTCTGTGAAGTTTCTATGACAGAAGATCTCGCTGAAATACAGAAACAGAT  
TCGTGGAGAAGTAGACCAAAAGTCCAAGAGGTTCTTCTCAAATTCAGGCAACGTTAAGAGGCTATCAG  
AAAAGAGGGTGCATGGTTAGAGCGTCTGCGTAAGATGCATCTTAATGGAATTCCTGCGATGACATGG  
GATTAGGGAAGACGTTGCAGACCATTATTGCTGTGACACAGAGTTCGCTTGGAAAAGGGCGGCGGATGTTT  
TCTAATCACAAAACCCACTTCTCTTGTGTACAAGTGAAGAAAGAAATTCGAAAATTTAACCCAGAGTTT  
AAGACTCTCGTAGTTGACGGTATTCCTGCTCAGCGACGTAAGCAGTTAGCTTTCATTAGAAGAGTATGATG  
TAGCGATTACTTCTTACAAATTTATTGCAAGAAAGACATCGATATCTACAAAGATTTTCTTCAAAACTACGT  
TGTTTTAGACGAGGCGCATCACATTAAGAATCGAACTACCCGCAACGCCAAATCGGTAATAATGATTCGC  
GCTTGTTCATCGCAAAATTCCTTACAGGAAGTCCGATTGAGAAATTCATTGGAAGAGTGTGGAGTTTATTCG  
AATTCCTCATGCCAGGTCTCCTTAGCAGCTATGATCGCCAAATGGGTAAATACATTCGTATCGGTAACTA  
TATGGGGAATAAAAGCGACAATGTGGAAGCTTTAAGAAGAAAGGTTGCGCCTTTTATTCTTCGCAGAATG  
AAAAGAGGATGTTCTAGAAGATCTACCTCCTGTGTCTGAAATTCCTTATCATTGTCATCTCACAAGATCAC  
AGCGAGAAGCTTATCAGTCTATGCGGCTTCGGCGAGACAAGAATATCTCGCTTAGTGAAAACAAGAAGG  
TTTCGAGAGAATTCACATTCATGTGTTGGCTACGCTTACCCGATTAACAACAGACAATAATGTCATCCGCA  
ATTCAAAAGCAAGGATACCTCCAGAGCCAGGAGATTCAGCAAAATATGACATGTTGATGGATCTGTTGAGCT  
CATTAGTGGATTCGCGCCATAAGACAGTTGTCCTTATGTCAGTACACCAAGATGTTAGGTATTATTAGACA  
AGACAAGAAAGCTAAAGGATTCCTTTCGTATATCTGGATGGTCCACCAAGAAGCAGATTAGAGATTGTT  
CAACAGTTCAATGAAGATCCAGGTCTTCTTGTCTTTCCTTGGTTTCTTTAAAGCTGGAGGAACAGGATTA  
ACTTGGTTGGAGCTGATACTGTGATTCATTACGATATGTGGTGAATCCTGCTGTGGAGAATCAAGCTAC  
CGATCGGGTGCATCGTATTGGCCAGAGTTCGTTCCGTCCTTCTTCTTAATAACTAGTTACATTGAATACAATC  
GAAGAAAATAATCCGAGCAAAAGCAACCGGAAAAGGGTCTTGTAAGAAAAGTGATCAATTCGATGATG  
AAGTCGTTTCTAAGTAACTTGGGAAGAAGTGTCTGAACTTCTACAGATATAATTTATGAGCCATAACC  
GCAGCTTATATAAGATTAACAACAATACTAACCCTCTGTATAACAAGGCGTTGGGTCTGTTTCGATCGTGT  
ATTTAATTTTTTTTTCGCGGAATGTTGGTATCGACCTAGGGACGGCAAACACCTTAGTTATGTCAGGAGT  
CGAGGGATGTTTCTTAGTGAACCTTCCGTTGTGGCTGTAGATGCACAGACTCATGCGGTCTTAGCCGTAG  
GTCAATAAGCGAAGGCGATGTTAGGGAAGACCCCGCGGAAAATTGTAGCTGTTCCATGAAGGACGG  
TGTCATTGCGGATCAAAAAATAGCAGAAGGGATGCATAAAGCCCTCATTAACGAGTGACTCCTGCTCGT  
AGTATGTTTCGTCCGAAAATTCCTATTGCTGTTCCCTCAGGAATTACCGGTGTTGAAAACCGCGCTGTTG  
AAGATTCGCAAAAGCATGCGGGAGCACAGGAAGTAACTCTGATTGAAGAGCCTATGGCAGCAGCCATTGG  
CGTCGATCTCCCTGTACATGAACCTGCAGCAAGTATGATTATTGACATTGGGGAGGGACAACAATAA  
GCTATTAATTCCTTGGAGGAATGTAAGTTCGCGTTCAAAAGTATAGCAGGGATGAGTTCGATGAGT  
GTATTATTAATTATATGCGCCGCACATACAATTTAATGATCGGTCCGCGGACAGCAGAGGAGATCAAGAT  
TACTATAGGTTCTGCTTATCCGTTAGGTGATCAGGAATGGAGATGGAAGTACGCGGACGCGATCAGGTA  
GCTGGGCTGCCTATCACGAAAAGAAATCAATTCGTAAGAAATTCGGAGTGCTTAGCAGAACCTATTCAGC  
AAATTATAGAATGTGTACGGTTGACTCTAGAGAAGTGTCTCCAGAAGCTCTCTGCAGATTTAGTAGAGCG  
TGGAATGGTGTAGCCGGAGGAGGAGCTCTGATTAAGGGTTAGATAAAGCATTAAAGTAAAACACCGGG  
CTCTCTGTTATTACAGCGCCGCATCCACTTTAGCGGTCTGTTAGGTACAGGGAAAGCACAAGAACATC  
TGGATCAATTGAAAGAAAGAAAGAGGTTTATGATGACCGGGGATGGATATCTAAGATAACCCATTCA  
GGATTAATAATCTTGGATAGAAGAAGTAATTGCCAAGTGTACCTGACGACGTAAGGTTATGCGATGGTT  
CAGAAGCCGAATACCAACAGCACAACAGCAGATGCAAGGATGCTGGGGTATGACCCCTCAAAATCCGTA  
GCTGCATCCTAAGTCTTCTCGTTCGTTCTTCTCTTAGTGATGTCGCTCGTGTGAACAAATTAATTT  
ACAAAATACCAAGACTCAAGAAGAAGCTGGTCCAACAATAACTGGAGAGATCCCAAGAGATGCGTGCAG  
AGCTGCACGCATTATCCGAGGGTGTATGCGAGGTGCGCACTCTACATTGTGCCCTTCAAAATATGGGGCC  
CAAAAAGCTCTCCATTTCCAAAATTTGGTGTGAGATTACAGACTCTCCTTATGTTGTATGTTCTATGAAG  
ATCATGACGCGTATGGGAGCTTCTGTTTAGCGATGTTGGGTCTAATGGGACCTTCTATAAGTGTTTAC  
ATAGTGTAGGGAAGCCCTTAGCTCCTGGAGAAGAAAGATGTAGCATGGCCTTGTGATCCGAGCATATGCG  
TATTGTCCAATTCCAAGATGACAGTAGTGTGATGCTCAAAAGTAGCGGATACGGAGGCAACGCATTGCTA  
GGTAAGAAGTGCCTAGCACAACGTTTAGCTTCTTAATTTAGGACATCAACAAGGTTGGTTAGCGGAGCATA  
TGTTGATTATTGGGTGACTAACCTGAAGGAAGGAAGAAGTATCAAACTGCGGCGTTCCCTAGCGCTTG

TG GAAA AAC GAAT CTTGCTATGTTGATGCCTAAGCTGCCAGGGT GGAAGGTG GAGT GTATTGG GGAT GAC  
ATTGCTT GGATTC GTCCTGGTAATGATGGGAGATTATACGCAGT GAATCCAGAA CAAAGATT CAAA GAG  
TGGCATTAGGAAC TTCAGAGACTACAA ATCC TCACGCAC TTGCCACTTGTTCATGCGG ACTC ACTATTCAC  
GAACGTAGC CAAA ACTGCTGATGGAGATGTATGGTGGGAAGG TAAA ACTACCACGCCTCCGCAAGGTATG  
ATTGATTGGAA GGGT CGAGCTT GGGT CTCTGGAGGGGAGCCTGCAGCAC ATCC TAATGCGCGT TTTA CAG  
CTCCGTT GGATCATTGTCCTTC TTTA GATCCGCAATG GAATAATCC TCAAGGGGT TCC TTTA GAGGCGGT  
CATT CAAA GTGGAAGACGTACAGAGACC ATCC TTTA GTATATGAGGCGTTAAGCTGGGAGCATG GGGT G  
ATGATGGGGCAG GGAT GTCCTCAACGACA ACTGCCGCGATTGTAGGG GAGTT GGG TAAA ACTGCGACATG  
ATCC T CAAA CTATGCTTCCAT CAAA TGGCTATAACATGGCAGCTTA TTTC GAGCATTGGTTGTTCG CAAA C  
TAC TAAA GG CAAA CAGTTGCCTA GAAT T CAAA GTGTCAACTGGTTCCGTAAGGAT GAGCACGGGCAGTTC  
A CAAA GCCT GGGT TCTCA GAAA ATCTTCGTGTATTA GAATGGAT CTTCGTCGTAC GGATGGAGA GGATG  
CCATTGCGCACC GTACTC CGGTAGGAT TTTA CCTACAGCAGAAGGGCTTAATACATCGGGGCTTGATCT  
ATCC GAGGATGC CAAA CGAGC CAAA TTGACTGTAGATGCGCAGGGT TG GAAA GCTGAGGTCAGTAAT ATT  
CGGAAGTATTGTTGAT TTTT CGGAGCTGATATGCCACAGCGC ATTC TTGAAGAAT TATCCAGAATA GAAA  
GCGAAT T GAAA TAAT TAAA AAGAAA C GAGT CAAA ATT ATTC TAG TTTA GATACTATTGTT TTTT TGT TTT  
AAAA AACATTT TTTA TT TTTAAA ATTA GAAA AACAATAGT TTTT T GGATGATCTCGTGTCAATACAACCT  
ACATCC A TTTTCT TTAAC TAAGAAT ATAACGGCAGC TTTAGCCGGAGAGCAGGTCGATGCTGCTGCAGTGT  
ATATGCCGCAGGCTGTTTT TTTTCTTT CAGCAACT GGATGAAAAAAGCAAGGGGCT GAAA CGGGC TTTAGG  
AT TGCTCGAAGAGGTTGATCTAGAAA AA TTTA TACCGTC TTTAGAAA AATCACCTACACCTATCACTACG  
GGAACAAC GAGTAAAA TTTT CGCTGATGGGAT TGAGATTGTTGGAGAGC TTTT TCA GAAA CAAT CAAAG  
CAG ATCC TAATAAA GCTGCAGCTCAGGTT CAAA GAGAGGGGCTTG CAGATAGT CAAA ATGATTGGCTCAG  
ATTATCT GAAA ATGGGGGGATTC AAG ATCC TACAGCAATAGAAGAAGAGATTGTTACTAAGTATCAAACA  
GAACTCAATACTC TCGCAATAAA CTCAAGCAACAATC TTTA ACAGACGAT GAGT ATACGAAGC TTTATG  
CTATTCCTCAAAC CAAA T TAAA GAGATA GAAA GCT TAAA GAAT GAAA ATAATGTGAGGTTAATTC CCAA  
AAG TAAA GTCACTAACT CAAAGCAGAAT ATCATGCTCACTTACAAC TC GGTAACCTCGTTATCAGAACCT  
GTTGCCGATGCGAT GAATACGACTATGACG GAGTACTCTCTTTA TATTGAGAGAGCTACAGAGGCTGCCA  
AGTTGATACGGGAGATAACCAACACGATCAAAGACAT TTTTCAATCCAG CAAAGGAT GTGCGTGAACAAC  
AGGAAT T TTTA GGT TAAA AGGAGCT GAGTATAACGC TTTA GAAGGCAATATGATT CAAAGCTTGCTTAGC  
CAAA CGGGTCTATTC CGGCAGTTAAT GAGTCTACTGCAACAGTTGATGAGATAGGCGCAC TTTA TCCTA  
AAA ATGATAAA AACGAAGACGTC ATTCATACTGCTATTGATGATTATGT GAATTC TTTAGCTGACAAAA  
AGCCAATGAACAGGTCAA ACTCAACGGTCTGTT GAG TTTA GTATATGCTTATTATGCTAGTACT TTTAGGT  
CAAA CTAAGAAGGAT GTATTC AATAATGCACAAGCTTCT TTTA CAGATTATACTAAT TTTCTAAA CCAAG  
AGATCC AATATTGGAGCC TAGAGACTTCAAGT TTTA ATATCTCCAATCAAGCATTGCGAACC TTTAA  
AATAAGCCTTCGGCTGATTATAACGGCGTATATCTT CAAA ATAA TAAA GGAT TAGCGACTAATCTC TTT  
AATCC TAC ATTC TTC CAAA ATGTTGT GAGTCTCATGACAGCTG ATCC TACGAAGACTATGTCTCGACAGG  
ATTACAATAAGGTGATTACAGCCTCG GAATCC AGT ATTCAGAAGATTAATCAGGCTATTACCGCTTGGA  
ACTAGCTATTGCA GAAT GTGGGAC TAAA AAAGCGAAGCTCGAACC ATCCAG TTTAAA TTAT TTTA ATGCT  
ATGGTCGAAGCGAAGAAGACCTTCGTAGAGACCTCTCCAATACAGATGGTCTATTCATC CAAA ATGTTGG  
ATAAGTATCTTCC GAAT CAGCAGTACATATTAGAGACATTAGGAAGTCAGATGAC TTTCTCTAACAAGGC  
TGCTCGGTAT TTTAAA TGATATCATTGCGCATGCAGTTAGCTTCCAACAGCTAACGCTATT ATTC TTTA  
GGGATGTATCTTCGACAAATGAACCAGCAGGAA TTTT CTGAGGTGA TTTT CCGTGCTAACGATACTGTGA  
AAAAAGAGATAGATCG GAGTCGTGC GGATCTC TTTT ACTG TAAA AAAGCTATC GAAA AGAT TAAA GAAT  
AGTGACTTCTA TAAA TGCGGATACT GAAT TGACCTCATCTCAGCGTGCAGAGT TATTAGAGACGTTAGCT  
AGTTATGCT CAAAA CAAA GAAT CTCTATCACAACCTCTCTAATG TTTA CGTCATGG TTTT TAAGGTAC  
AGA TTTT TGCGTAAGCATGCCTGATGAAGTGGAT GAGGCT TTTA CTGCTAAGATT GGATCGAAGGAAT  
CGATACTT GGATTC AGCAGCTTACAACA CAAAAA GTGCTGTGATTTGAAGGTGGGCGTAATGGTGTGATG  
CCTGGGGGAGAGCAGCAGGT TTTA CAGAG TTTA GAGAGCAAGCAGCAAGATTACACGTCGTTCAACC GA  
ATCAGCAATTAGCTCTACAAATG GAGT CTGCAGCG ATTC AACAAGAGT GGACTATGGTAGCAGCAGCCTT  
AGCATTAAT GAAT CAGATT CAAA CTAAGTTGATCC GTAGA TTTAAA TAAA ATCGT TTTAGAGGGCAAAA  
CGATTATGA GAAA CCATCCGATTC CAGAAGGACAAAAGTAT CAAA TTCCAACAATAGAGACTGCGGCTCC  
TCGAGAACGCAGAGT CTCCCCTGCAGAAGTAGCAGCCGACTACACGCAGTTGCATGAGGCGGCAACGTAT  
CTTCAAGTA TTTT AAGAT TTTA TTGAACGATGCGCATCAGTTAGGAC TAAA TAAA GAGT TCGTAGA GAGCA  
AA CGTCAAGAT TTTT TAAA AACAGGCTCCGAGATGTC CAAA ATGCAAGCTCTATGGACTGAAGAG GAGTCA

AAGAGAAGCGCGTAAAAGAGAGAAGAGCTCCAGCAACAACCTAGAGTCCAAGGTACTAGGTCCTCAG  
GCATTGACGACTGCTAAGGAGTTGCATCCGTGGATGATAGTATTGTGAATAAGATGCCTTTTCAATCGG  
CTCAAAACGTATATCCTTCTTGATAAGTATATTCCTGCACAGGAAGAGGCTCTGTATGCATTAGCAAGAGA  
GCTCAATTTTTCAAGGTATGCACAGACATTAATTAAGCCAGTTTTAGAGTTAGTGAAAAGTTTATAAAC  
GCGCCTATCGTTTCAACTTAGGCTCTTACATTGGGCAGACAGCAGGAAGTGCGAACTTTAAATATGGCT  
ATCAGATGGTCTTGGATCGTTATGAAACAGAGACTGGCCAGTTGAAGAAAGGATATTAATAATGCTGAA  
TGCCAAGCAGCAGCTGGCACAGATTATTAAGAACGTAGAGGCAAATAATTCATTAACGACAGAGCACAAG  
ACTCAGCTCAAGGATATGGCAAATGGGTATATTCAGACTTTAGATGTCTGTATCTCCAAATGCAAGAGC  
TGCTACTGGATGCGAGGATATCAATTTATCCCTGGTAGAGATGAATACAACCCGCTTATGAGATTAT  
GGGATCTTCTTTTTCGTAGTTACTTTACAAAATTTGGAAGGGAAGGTTGTGCGATGGGGAGATCAATAAT  
TCCTCTGGAAGAAAGGAAAGGTGGGCTTTTAACTTCATTTTCTTGCAGACGTACAGAATCAAA  
GAGATTTAGCACAACGAATCAGTTGATGTTAGAACTACAAATGCGAGCTATGCATCAGCAATGGAGTTT  
AGTTACAGCCTCTCTGAAACTCTTACATAATGTATATAGAACATTTGGCTTCTAGCTAGACATGAGAGAA  
ATCTTCTTTAATCTCCCTTGAGGGGGAGGTTAAGAGAAGAAGGGTTCGGGGGGTGAATTTGAATCCCTC  
CGGAGACGTTACAGCGCGCTGGCTTCCCCTCTTCTTACGTTGTAGAAGAAGTTATCGGCGATATA  
GCAAAATCGCTCCGATGCAGATGTTTCACGATGAGAGCTGGTAATTTTACGAACTTTAAACAAAAGGTTA  
GTGAAGCGATCTTCTAATTTCAAAAGCTGTGCTCGGAGCTTGGCGAGAAACTCCCTATAGAAAACG  
CTAAGTAAGGAAGAACGTAGTCAATCACATAGGTAGTAAGACCTACGCAGACACTCCACTCCTTGAAGTT  
CAGTTTCCATCCGAGTCAGCGATGAATACTTCTGGATTAGCTTGACTGCAAACAATGATGTAGTCAATA  
GGCAAGAAGCATGGCGATAGTCTGCACCGACGCTTACAAAGGAAACGCCATCTTTCATATGACTTTT  
TCAAGCTAACATCCCAAACAAATCCGTAATTGGACTGTACTTCAATCATCCCGTCCGTAACCTCTGATTC  
AGAATTGAGAGGTTCCGAGGTGAAGTCTCGATAGGCATTCATGGGAAGGCGGTAGTATTGTTTCAGTCTT  
CCTACTTTTCACTTCGAAACTCACATCAAACAGAGGAATCGCGCTCAGCGAACGATCAGGAAGGAAAAG  
CTGCAGCTACACAGCAAAATTGAGATTACAGTTTACGAGATCGAAATTTCCGCTCAAAGTTGTGCAAGT  
AATATTAGGAGAAGGACCAATCCAGCTGTTGTCACAGAGGTAACGACAGGGACATCTTTTACTGAGCT  
TCTTCTGAAAAGATATAATCTCCGAAGAAGCAGAGCTTACAGGTTACCGGACAGTGCAGGATAGTACATCAT  
AAGAATTACATAAAATCGAAAGAACAGGCATTTTTCTGTTCAATATTAATCCCGGATGACTGAAAACGC  
CGGATTCCTCCGAGGCATAGCGTCTAATGAAGTAGATGCGATCCCTAAAAAAGATAGGAAAGTCAAACGG  
AGATAGTTCACTAGCTTGCTACTCAATTTAGTCAAGGGCCTTTCCAAATGGTCTGGGACTGAATCCGTATC  
TTTAGCAAATGCCAAAAAATTTGACAAAGGAAAACATCGTCTCTCTAGCAGGGAAGGCGTTTATGCTT  
TTCTCATTGAAGAAGAACCTTATAAAATATTCCTTCTCAAAATATCACGTTGGAGAAGCTGAGCGATCCCTTC  
CTGAATATCGAGATTTTCGTAGAGAACCGCATAGACGCTGGTGGTAATCGGCATGTCTATTCGTGGTGT  
GTAGCAAATAATGAGCAGAGAGAGCCGTGTACACCCCTTCGACCACCATAACCAATTAATTTTTCGCTT  
GTTTTCAGGAGTCCAGGCTTCGGCTAGCAAATTTCCAAAGAGGGTATTTCTACTGAAAGCAGAAAAGCAGGT  
GGTACAGAGGTTCTCTAGACCTGCGAGCCATTCAGGTATCTGGACGGCATCCCATGATGGTGGCAAAT  
TTACGAATTTTCATGCAGACCTCGGGTAAACAAGTCCAGATTTAGCATTATCCCGAAGCGGAATCCGTTCAG  
AGATTCACAGGCTATGGCGATTACATTTTTCAGTGTCTCTCTAACGCAACTCTTTTAGGTCGTATT  
AGGATAGACACGAAATGTAGGGGTGAGAAAAGCTCGATGAACAAATTTTAGAGTATCAGGGTTATACGCA  
CTGATAACAACCGAGCAAGGGCATCCACGAAGGACTTCACTGGCAATAGAGGGCCACTGAGATAGCCTA  
GATGTTGCGCGGGGACGGCCAAATAATTTCTAAAACGATTTTCGCTTAGGAGTAAGCCTGTATCAAAATTC  
GATACCTCAAAATGTGATTACTAGAGGAACGCGAAGCTCTGTCAAAGCCTCAAAGTTGTGTTAGAACAGGT  
CTCATTCCTGCTGAGGTCATCTCTACAATCATCGTCTCCATCTAGAGCTTCTTCCATGTGGTATG  
TGAAAGAAAATTCATGAGGAATGGAGATATGAGGAGCTGCTGGGTGTCGACGTTGCACAGACAACGTTC  
GATCAGTGCAGGGTTTCTTGCCCATCCACTACACGATGACCATTATTAGCAAGAAGATTGGCGAGGAA  
AATCCACCATGCCCATTCCTAGGTAGGCTATAGTCTCTTTTCATGAGGCTCAATAATTGTTTCTGAA  
AAATATCTTAGTTTCCACTCTAAGGAAGTATGGGAGGAAGGGTAAATAAAATCCGCTTCTAATTCAAAT  
ATTGTAACAAGAGAAAGTTTCTTTTCGTAACAGCAGTAAATAGAGCATGTTCTCTCAAACGCATAGCTT  
CTCGAACCGTTGCAGGGCTATGGTTCCTTACATAGTTCAAAGAGGAGCAAAGCATTCGTGGCGAGGATA  
TACAATGGCTTACTGTGTTGCTATATTGGAACAAATCAAAAATAAAATTCCTTCAACTTCCAAGCATT  
TTTTCAGTGGTAGAGGATGTAATTGCTTAGCGTGTTTATTCGCCAAATAAAGAGGAAGAGGTTGGTATG  
CTGCAAAATGCTAGAAAATCCATAGATAGACAGTACAAGCCGATAAAACGAGTTTATAGGTGAGATCTCC  
CTCTGTAGTTTTCGCGCAACGTTCTTTAGTAGTGAGTGTGGAGTATTCACAACCTGCAATTTCAAAATCAA  
ACTAATTCGATTAAGACTCCAACATCTTCTTGTGCACCAAAATCGTAAAGTAGTCAAAATAGTGACATCAT

TGTGTTCCGCTGCATGAAAGCCAACGAGTTCTCTATCAAAGGCAATGCTAAGGGATTATCTATAGGGAT  
TACACTAACCAATTCATCCCTGCTTGATGCCAATTAATCCAGATTCCTGAAGATTGTAATAATGTGGAT  
AGACAGCCATTCCTGTAGGTCCGAGAGATAGACGATCTTCAGATTCCTAGGAACAGATCTCCGGATAAAG  
AAAAGGAGAGGCCAGAGCGGCTGGCAAAAAAATCTACTTGGGAGGGAGACAAATTAATAAGTCGTTAGT  
AGCAAAGTAAGAGAGGGTCTGTTATGATTAAGAGGGGAGGTCATAATCGTAATGGCAATGGTCTCCCT  
ACCCACAACTAGCCGCGGTACCTTCTCTGCAACTAGTTGATAAAGAGGTTTTCCTTACAGAGGAAA  
CAGGATAGAGCCCAGAGGCCCATCAAATTTAATCGCGATCCCTGGCCACCAGCTAATACGACGCAACC  
AACCTTACCTCAGCAATAGCTGGAAGCCCAGCTGGGCATAAGCAGGGTTGTGCGCCAGCATAGTGTACA  
GGGGATAAGGGAGTATATTCCTTGATGAGAGGCTTGAGGATCAAAATAGTAACGCTTGCTGACGAAAGAAA  
AAGGAATATCGACAAAGCGACAAAGTGCCTAACCGTAGCCCAATTGAGGGGATAACGAAGGCCAATA  
CTCTAAATAATGCTCCTGTTGAATAGGAAGCAGCTGATCCAATAGAAATGATAAATCTACATACGAGGAG  
TCGGTCATTGTAGGTGGCCTTAGTTATTCGCGCTCTTTATAGGATAATTAATGTCATGGATCTTTTCGAT  
AATTTCCTCAAGTCTAGTTGTTCAATATGTCGCCATAAGCATCTTTCAGAGACGTTCCTCAGGGCCTGA  
TGCTGTTATATAGAGAAGCAAACTCTCAAATAAATGTTCTAATGTTGGTCATATTCATGGGTATATG  
ACCGACATAGGAATGCAATGCTTGTAAAGGAAATTTTCGCGATGTGCTCCTGTACAATTTGTAAGCG  
ATGTTCTATTGTGGAGAGCGCTTTTTCCTACTGTTTCACACCGTGTACGTTTCCTGAAAAGCTCAATAGTG  
AGCAGTTTAGACAGATCTTGAGGTTTTCATTCATGTTTCACACGTTGGCACAGTTGTTCAATAGTTTCA  
TGAATAGCTGAGTAATGAGAATAAGGTTGAGATAAATTTGTTTCGAGGGGAGCAAACGAATGGCTC  
TATCGAGGTGAGCATCTTGTCTGAGACATAAGCTCCTAGTTGGATGATATCAATAGCTTCATGATAGGC  
CAAAAGTAAGGAGAGAAGCTCTTGAGCTGCAGCATAATGATGAGGGAGAGCTAACTGACGAGAAGACCGC  
GAAAAGCTCGTTAATACATTGATAGGAGGAGAAAGAAAGCTTTTTCCTGAGGGGAGAGAAAAGAAATGCC  
CATCCAGAAGAGATTTTACATAATCAGTAAAAAATATCTGGATGGCAACGTAATGCAAAATGGCAAAAA  
AGATGTGATAGATCCTTTATCATTATTCACAGCAGCTTCTAGGAACCTCTGCAACATGATGAAAACGGAT  
GCAGCATAGTGGTGTGTAGATAGTGTCTCTCCTCTCGCGATCGCTACTTCTTGAAGGGATTCTATCCATC  
TAGATAAGGAATCCATAGTAAATAATACGCGAGCTCCTTGATCTCGAAAATATTCGCGATTGTGATTGC  
TGCGCGCCTGCAATGACCAAACTAGCTGCAGTTTTCATAAGCGGTAGAGGGCGATGATAACGGTACGTTGA  
GCGGCTAGGCCTTCCAATGTTGGTTGACATAGTCGCGCACCTCACGACCACGTTCTCCTATTAGGGCAA  
TGACATTGATTGTCTGTTGGGAACCCCAAACTATCGTAGACAGAAGAGAAGATTTTCCTCCTCCAGGCTC  
TGAAAAGATGCCTACGCGTTGTCTTCTCCTATGTAAGGAGGGCGTCGATTGCGCGGATACCTGTAGGG  
AATACCTCTTGGATCGGAGTACGCGACATAGGAGAAGAGGGAGAAAGAAAATAGAGGGGAAAGGTTTCGTT  
TAGGGAGCTGAGATCCATCCATCTAAAAGGTTCCCGAATCCATCAAGGACTCTTCCAAAAGATGGTTGGA  
TAGAGGAAGAGAGGAGGCGCTGCGTAAGGGAACACTTCCGGCTCCTATGGCAAGATAGTATATGGGAGTC  
AGAGCGAGTAATAATGTCGTGCGATTGTGAATGCCAATTACTTCAGCTAGAATAGGGTCTGACCGAGATA  
GAGAAACAAAACAGAGTTCTCCTAAGCATGCGGAGAGCCCTTGAGCTTCCAGAAGAGATCCATGATATGCG  
TGATAAAATCCACATTCGATACGGGCGCCATTGATGGATCAACAAGGTTTCCTCTGTAAATGAGTC  
ATACCATGTACGTGGTTAGGGGATTCCTTGGTTTTCAGGATCTCTCGTACGTAATGCAAAATAGCTGATG  
CCGCCTTATGAGTGAGTACACTTAGTAGATGGGACAGCTCTTCCCGATGTCTTGTCTCAGAATTCCTG  
AAGGGAGTTCTATTTATAGCTAGCTTTCCTTGCAAAAAGGATCTGCAATGAATTCGATATTCAAAAGTAA  
GGGAACATCGTGAAAGGATTAACCAATTAGATAGGCAAAAAAGATCTTCAGGATGTAACCTATTTCATG  
GGAGAGACGGCATAAGTAGCTAAATGATGTTGCAGAGCTGCGGAGATTAGGAGAGCAAGTTCTTCTGTAC  
AGGCAAGCTTTCGTACAGAAATTTTCACAGACGAGGACAGCAAGTTCAAGAAGCTCAGGTTCAGTTT  
CTGAGATAAATTTTCGATTCAGAGAGAAGATGGACAGATAAATTAACGGAACACCTGAATAAGAGAAAAG  
AGCTCATGGGAGAGAGCTTCAAACTCAAAGAGAGGTGTTTCATGGGTAGTTGTGAGTTATCTAAAACAG  
CTAGGGAACGAAGATGAGGAGAAGCCACGTAATCCCTCAAGTGTTATGTTCTTAACCTCAACACAGCAC  
TCTTCAATTCCTCAGGAAGTTATTAAGAAGTTCTTCCGCTCAAACTGAGTCTAGATAGGAGAGAATCAA  
TGCAACTTTTCCTGGGATTCCTCTTTCATCATCTCTATCAGCAAAATATAATTAATGCTCTGTATTTT  
TCTTTCGTTGAGAGACATGGTCATAGGTATGAAAAGCAAGATAGAAGGTAGCAAAGCCTAGAATTCCAA  
GGCTTAGTAACACAATAGTAATACTCAAGACAATCGAGGATAGGCGAGAAGTCAAAATGTGCTACGGGT  
TAGGAAAGGACAATATCTACAGACGGATGCAATTCCTGAGAATGCTGAGAGAATCTCTGATATGCGAG  
AGCAACTAACACGTCACCTTTAGGAAGGATATTGAGGTAGTCCCTATCGACGAGAAGTTGCAAAATGGC  
CTTCAATCCGCTACAGGAATATAGTTTAAGGCAAAATGCGCAAAAGGAAAGAAATCGCAAAATAGTGAGC  
TAATGAGGTAGTGAGTAGGGTATTACCAAAATTCGAAGAGCGGGGAGTAGAGATTACCATGCTGATCGGAC  
AAGGTGATATGTTCTTAGTTAAACCCAGGGACGCTGCGTGTGAGGTAATCAGTGATTGAGTGCACGAGTG

ATGGGGATAATGTCTGAAGCCTGAGGAAGAGAAAAGGATCACGGAGATTTCTGCTAAGGAGTCTTCTTCTTG  
GGATAGAGCAACCGTTGCTTGGAGCACAGGCTCAAATAGAGTCAGATCTTTTCTAATTGCTCTTTCCAA  
ACTTGGATTTCTATCGATTGAAGATTCCTTAAATGGGAGAGCTTCAGCCAATGTGAGGGTTTTCTCTG  
TAGAGGCTACAGTAGGGTAGGCTGAGGAGAGGATGGTTTATACAACATGATGAAGCCAATAAGAATAGC  
TGCAAGAAGGTAGCCTTAAAGATTTAGTGGAGGCGATCTTATTTTATAGAAAAGCGAGGTAGCACCGGCATT  
CTCCATGAAGTAAGTTCTTACAAAAGCTCCACGTATAGGTTGAGGAATAGAGCAAAGGTAGAGCCCGCTA  
AGTATCCTGCAAAAAGAAAGGATGAAAAGAAAGGCTTCTTCTTGTGAACAAGAAAGAAAATTAGCATCCGG  
GATGACCAAGAAGCTCAAAGGGGCTCTCAATTAAAGAGCCCTCAAACTCTTCTGTAACAAAAAGAGGCT  
ATTAAACAATAGGTTATCTAAAGAAAGATTTTCGATAGGATCAAAAATCAGTTTAAAGGGATTTAAATA  
GTAGAGACTGTTTCGTCCTACTTTTATTTCTAAATAAGGATAGACATGAGCTCGAAAAGAGCTGCCCTATCGA  
ATTGAGAGTAGATCCTACAGAGGATAGACAGGACGAACAAATTCCTGAGTAGGCAATGGTTACAGTAAGC  
CCTTCGAAATGAACGATGCGAACATCTCCGGAATCCACGGCGACGAGAGGTGCTATTTTCTCTTTTCATCA  
TAGTATTCATGCTGAGAGCTGTTCTCATGGGAGAGAGCTCCCCACTCTTCTGTGGAGTAGGGATTCCTC  
TTCGCTAAGCTGAGATAGTGCATCCAAAAAGGGAAAAGGGCTGTCATTCACGGGAATATCCACACATTGT  
TCAATAGCAATGTCTAAGGCATCTATGACTAGATGGTAGAGAGGAGAGAGGCTTCTAGGAAAATGGAAG  
GGTGCGCGTGTCCGCGACTTCTTGGTCTAGATCATTAATTGTGATTTTATACGCTTCGGCAAAAAGTTT  
CCCAATGACTAAAAGAGCAGGTGGCTTCAGCGAGTACAAGGAGATAAGGGTGTCCGAAATATTGAAATTTA  
GCTTCACGGATTATGCCATTGGTCAAACTTACCAGCCAGTAGAACAGCAAAGTGTTTCCCATGAGTAGGT  
GCCCTTGCCTTCTATGACAAGTTGTAATTTCTTATCCCTTGGTTCATGCGATAGGGCTCCGCCATGTTT  
AGGTTGGAAGAAAAGCGTAAGGATCTTGCAGGGAAGCTCCCCATAAGGGAAAAGGATAAAATGGAATC  
ATCATAAGGATTGAGTAACCAGTGGTTGTAGGTGAGAGATCCCTTCTTGTAAAGCGGTTGCTAATGCAGA  
GAAGTGTGTAGTAGGAGTACGTTTCAGTAAAGATACGTTGTAAGCGCTGTGGCATAAGAAGGGAGAGATG  
CCCGAACCAATAAAATCTGCGATAGAGGCTGGAAGCGTTCATAGCCTAACCTTACAAAAATATTTTTCT  
GGGAAAAGAAAATCCTAAGGACTCTGCAGGGATACCAGGAATAGCAAAGACAGCGACATTAGGGAGACG  
AGGGGCACTGTCTTCCAAAAGGAATTCGACTTGAGGAATAGCGGAAAAGAGCCTGTTTAAAGAGCTGCTCGA  
GAAGAAAATAGCAGAAAGCACAAGAGAGGAGAAAAGCGTTGTACGTTCTGACAGGCAAGAGAAAAGCTG  
CAAGAGAAGTGAAGCAGGTAGGGACTTGTGGATTACTAGGAAGCCATAAGGAAAATATCAAAATTAAGC  
GGGAGAAATAAACATCGCTCCTGAGGGACCAATCCACCAAGAGACTGTGAAGAAAAGTAAGGATATCT  
GCTTGATAGAGTTCTGCGGGTAGCGGCATCTTCCTAAGATATCACTCAGGCTATGTGAAAATTACCC  
CGCGTCTTTTACATAACGCAGCAAGCTCAGGGATCGTTCCAGAAATCCTGTGCATACCATTGCAGCAGA  
TATGAAAACAGCAAGGTCCGCGGGAAAAGAGCTTCTGCTAGATCGGATTCCTTTACGCGGCCGTTCAA  
CTGGTTACCAATCATAGGTTGTCCTAAGTCAAAACGACGGCAGAGAGCATTGATGATAAAATTGTTGCT  
CGCAAGAAGGAACAAGAAGGTGATTACGCCCTGGAAGGCATCAAAAGTTTTCAGAAAGCGGCCACGAT  
AATGGCCGTGACATTCGGGTAATGAAAGATAAAATGAAAGGTAAAAGCCTTCTCCTGACACCCGTGTGAGC  
AAAAGGGCAGAAGCTTCAGCTTCTGCTTGTAAAGTCAAGATGGAGGTAACAAAGCCTGTACGAAAATACGT  
CTGCGTAACGTTGAAAAGCCTCTTTACCATTTTGGAAAGGAGGATGGCTTGTGTTGTTTAAACCAAGA  
GAAGGAGCGTGTTCGTGAATTCAAAATCCCGTCCATTCGTATACAATAGGCTGTCTGTTGGCACTCCA  
AAGAAGTACTTGTCTTCAGATAATTTTCTAGGTTCCATAATTAAGGAGCGCAAAAGAAATCCCGTGAGC  
AGAGATAAAATATTTTTCCCTTGTGAAGGAGAGGAAAATTCCTCTTGAATAAGGGGAGGGTTCGT  
TGCCCTGTATCGAAAAGACTTTCGCCCTGAGGAGGGGCAATGCGGTAGCTTCGGCGCCACAGTTTAACTT  
GTTCTTCTCCGAATGAAACAGCGACTTCTTGTAAATTTTCTTGGAGTTCTCCGTACATGCGTTTATT  
GAGAGCGCTAGATTGAAAAGAGGGATCATCTGCTCCAATTCCTTCAAACTATGAATCCGGCTCATGTCTG  
GGGCGTCTTCATGAACGATATAAGGAACTTCAAAAGAGCTGTGGTTAGTCATTGCTAACAGGGCTGTCA  
TCAAATTTCTAACCAAGGTGGAAGTGAAGATGCAATCAATAGGAAGATGTTTAAATAGATTCCTCAGCGGC  
AATAGCCTCTTGAATTCCTTGTGGCTAAGAGGGATGTCTACCCAGCCTGTAAAAGATTTTCAAAATTC  
CATAAGGATGGCCATGGCGTAGCAAGATAAGAAGCGTCATAGAGAGCAAGATTTAAGGATGATTACGAA  
AGGCTTCATCTTCTTTCGAAAAGGATATCCAAAAGAAATTTTAACTTATAAGGGAGGGGGGAACTC  
TTCAAAAATGAGCCTCTTAGAGAGGAGAACTTCTTCTGGACTCTCTACTGAAATCTTGATATGATGGGG  
TCGTTTAAATTTTAACTTGAATCTAAGAGAGTTCCCGGTGTTGTTTCGGAGAGAAGTTTCTTAGATA  
GTCGCTTATTAGTGAACCTCAAATATTAAGCAGTCAAAAGACAAAAGGACTGGCATGGCAAAGGTTTCG  
CTCAAATAATTTAAAAGCATCAGCAGGAGTTGCTTCGCGAAGAAAAGTGTGATGAGATCATTAAAAGGGT  
CTGTTACCGTTAATGGTAAGGTGGCTACAGGCCCCCAAAATGACTGTTGATGAGGAGCAAAATTCAGTAGA  
GGTAGGGGACAGCGTATCGGTGCTGAAAAAGTGTATTTCTATGGTGCAAAAATCTTGGGTATCCA

AACTCTTCTGAGCGTAAATTTCTGGATCAAAGTTAGTGATTGACCTGTTGTGCGACTGCCCTTACCGGT  
TGTTCACTGTGGGCCGCAAAGATAAAAGACCTCAGGCTTAATCAAAGTTACGAATGATGGAGAGTTCGC  
TAATCGGGTGATTCATCCCTCTTTCGGTATTACCAAAGAGTATTTATTGAAGGTAAGTCGGGATGTCACA  
GCGCGAGATTTAGAGACAAAATGGCAGGGACTGTGATTGATGGAAAAGTGGTACGTCCAGTTTCAGTTA  
AGAAAATCCGCCGCGGACTATAAAATTATTGTGAATGAAGGAAAAAACACGAATTCGTCTTCAAAC  
AGAGGCTGCAGGGTTACAGCTTCTGGAACAAAAGGATTCGCATAGGGAGCTTGGTATTAGGGGGCTTA  
CCTTATGAAAATATCGGGAGTTGACCGATTCTGAGTTAGATAGTTGCTTATCAGGAAAATCTGTGGCTC  
TCGTCGCTTAGATTAAGAAAGAGTCAAAATCCTTAAGAACAAGAGGGAGGTCTTTCCTCCCTTTTTTC  
AAATTTAGAGGTACACTCAGGAATTAGGGGCTTGTAGATAACAAAATCCTGGGAGCGGATATGCTTTCAA  
GGGTATTTTTAGCAAAATGCTTAGGAGGGTTATTCGGGGTTATTGTGCGCTTGGCTATACAGCAAAGGCT  
CTCAAATATCCCTGGCGACAATCTCTTCGGCTTGCCTAAAAGAGAGAGGTTTACAAGAGATCGCAG  
CGTTGCAAACATTCCTCTCCTTCGTTTAGAAGAGGAGATAGCCTTTTAAAAGCAAGGCTCCTCCTATTC  
CAAAAAAGAAATTTCTAAAAGCTAGTGATGCGGATGGAGTTACTTTCTATGAGATGGAACGATTTTACT  
CTCCGATTGAAACAGACATTAGCATCGTTGCAAGAAAAGCAACATCAAGAGGCTGTCCAGCATTTAATGG  
AAGAACTACTTGCATGAGAATGCGTTTTCCTCAAAGGCCAAATTTTCGAAAAGCCGCGGAAACCTA  
TACGACTCTTACGGTCAATCCGGTAATCCGATTTCTGGGAAATCTTTTCGTTTTCGCAAATCTCCTTT  
CCGCCTTTAGATGAAGCGATATAGATACGAATAGGAGCTGTACGAGACGAATGAAAGAAATCTATTATGA  
AATAGCACGTACGGAATCAACGAATACGACAGCAAAAGAAGGGCTTTCCAAATGGGATCCCTATGCTCTC  
ACAGTGATCACGACCAGAGAACAACGGCGGGAAGAGGAAAACAAAAGAGGGTCTGGCACTCCACAGATC  
AAGATCTCAAAGCTTCGTCAAATTTCTTTTAAAGTGTGAATAATGTGGACAGTGCCAAATTAATTTCTGTAT  
AGGGACAGAAGCCGTGATGCGTCTCGGGGAATCGTTAGGCATTCAGAAGCTGTCATGAAATGGCCTAAC  
GACGTGTTAGTTCAGGGGAAAAGAACTTTTCAGGAGTGTGTGTGAGACCATCCCTGTTAAGACTGGAACGT  
GTGTCATTATTGGTATCGGTGTGAATGGTAATGTGGGTGCTGATGAATGCTAGGTATTAATCAGCCTGC  
AACGTCCTCCAGGAATGATAGGGAGGCTGTAGATATGGAAGAAGAGCTTAAGCGGCTCACGAAAGAA  
ATCAAGCATCTTATCCAGACGCTACCGTTATGGGGCGAGAATAAGGATAGTTAGTATCAAACAAAGCGT  
CGACTGTAGATGCAAAATAAATACCAAAAGAACCATAGTAGAAAATACAGAAGAACCTCCATAAGAAA  
TTAACACCAAGGGGACTCCGGTAATAGGCAGGAGACCATCATCATGCTGACATTGATAAGTACGTGCAT  
GACCAGGTGTACGGTCACTCCTCCAGCTAAAATATCGTCCAAATCATCAACCGGACAGCCACAGTACGG  
CAGCCGAAACAGACTAAGTTGTAAAACAACATAATACGAATAAGAGTCTTAATAGTCCGAATTCCTCTC  
CTATAGCAGGGAACACAGAGTCTGTATATCCGTAAGGAAGCCAGCCCTCCCTGCGAATTCGCCAGATTT  
CCATCCCTTGGCCTTTTAGCCCTCCTACTCCAATGAAAATAGAGAGGCTCAAAGTGTGTTGGAAGGG  
CTGAGCCGTTCTGACTGATATTCCTTTAATACTTTAGAGCATAAGGTTTTACCCTTGTGTCATGAGGGATAA  
TCCAGAGAAGATTAGTAGAGCAGAACATGCCAAAGCACAAGCACAGAACAGACAAAACACTAGTGG  
AGGATAGATATTTCCGAGATAAAAATGGTAAGGGCTATTGGGCATAGCACCAGGCTGTTCCAGATCC  
GGTTCCTTCAAGATAAGCAGAAAAGGAATCCCAACAATAATACATGCAACGAATGCTGTGCTTTTGAAG  
AAATCCGTGCAAAACGCATCTCTAGAATATAGCTTAGCATAATGACAACGGCAAGCAAGCATATTCGGA  
AGGTTGGACGCTAAGATTAATAATGGGTATGCGGTACCAGCGGTGTACATCAAAATACAGCGGGCACGAAA  
AATAGTCCAATAAGACTGAAAAGAAATCAAAGAATAGAGAACCCAAAGCCATCTCAAAATTTGATGGTAGT  
CTACATACAAGCAAATGAAGTAGGCACACCATCCTAGAGCAAAGTATCCAACTGTTTCAAATCTCAAAGC  
AGAGAACAGCCCTCGTGAAGTGTGGACTAACATAGAAGAGGGATCTTGAGAAGAGATCACAAATCACACTT  
ATGCTCATAAGTGAATGATGACTACAAAGACCCACAAGTTCACTTGACGCAAGTATCAAATTTTTCCTA  
TAACAGGGATGTTATTCGCGTCTTCCCAGGAAGGAAGTCTTGCTGTTCTGCCTACAGATATTCCT  
TCATTATACAACCTGTAAGCGGTGATGTTTTTTAAAAGGCGAAGAGCGTTAAGTCCCACGATCAGGT  
GCCCCCTTATGCAAAATCACAGCAAGCCATAGGGGATCACTCCATCGATGCTGGTCTTCAAATAAAT  
AAAATAATTGCTAGAGCTAAAGCAAGATCAAAACGAAACAATCCGACGAGTTTCCAAAATTTAATCAATAA  
GCCAAGGGAGAGAAAGAAAGCCCTTGGTTTAAAAGCACCACATCCGCGGCTTCTATGCTGTTGCGCTTCC  
AGCTTCTCCATGGCGATTCCTACAGTAGCCTGAGCCAAAGCGGGAGCGTCATTGATGCCATCTCCTATC  
ATCATGATCTGCCGTGATTTAGCAAGCTCTTGAATTTTCGAGAGCTTGTATATCAGGAGTCAGGTCGTAGA  
ACACCTCATCGATACCAGAAGTCGAGCTGTATTTTCGGCGCTGATACGATGGTCTCCTGTGAGCATAACA  
TACAGGATACCCATTCCTTTTCAAATAGGATACGATAAAAACAGCATCGTGGCGTGGGACATCCCGGAAA  
TAGAAAAGGGAAAACAGCAAAACCTAAGCAAGCTATAGAATGTGTGCGCCGCTTCTTGGACTTGTGAG  
CGGTTCCGGAAGCTGTTACGGTATTCCTCAGGAACGTAACGTAGCGCCGTCGAGACGCGCCCTACAAA  
GGCTTGTCTCCGTAAATTCCTCCGCTTACGCCCTCTCCTGGTATCGTTGTGCATTTGTGCTGCTGGTAGC



GACCGAACTTGCTTCTCAGTGAGGTAGTTGACAATGGCTTGAGCAATA GGATGAGAGGACGACTGCTCCA  
TAGCCAATACGCAA GAA TAAA ACAGAGGCG ATTC TGGACCAAAATCTTCGC ATCC TGAACAGGT TAAA TC  
TCCTGTAGTAAGCGTTCCTCGTCTT ATCC ATA ACTACA GAAT TGCAGGAGACTAGACGATCTAAGACTACG  
CCGCCCTTAAGCAAGACACCATG TTTA GCACAAGCATTAATAGCGCTAAGATAAGCAATTG GAAT AGCTA  
TGATAAGAGCACAGGGAGAAGCTGCAAT TAAA AATGCTAGAGCGCGG TAAA AGGCACCGTCTGGTCCGAG  
GAAA GGCAGTGTGT GAAT AGAGAGCCTCCTATAGCTATACATGCTGAGATAGCGAAGATGGTTAGAGCA  
TATGTTGAT GAAT AGCGGTCCAAACGTTGTTGTAA TTTA GG CAAA GAGC CAAA CGCTTGAACAACCAGAT  
TGATGATGTGAGCAATCGT GGATTC TGCACCGATGCGGAGGACCTGGAGATCAAAGCTCCCTTCTAAGTT  
ATGAGCCCCTGCAG GAAT AGT ATCC CCAATGCCACAAGA TTTA GGAT CT TTTT TCCAGTTAGATGCATG  
AGATTAATAGAAGAGGCTCCGT GAAT AAT TTTT CCATC TAAA GGAACAACCTCTCCACTTT TTTA CT CGGA  
TAA TTTT TCCAAT CAAA ACGT CAAA CAC TAAA ACTT CAAA CAG GGATCCGTCTTGCTGAACG ACCA AGC  
TACAGT GGGTGC TAAA TGT TTTA AGGAAGCGAGAGT ACT TTTA GCC TTTT CCGGAGACCATCGCTCCTAAG  
GATTC CGAGATGGCAAAGAGGACCAAGAGCAAAGCTCCTTCCAAAGCCCCTCCAATGAAGATAGAACC  
AGGCTGCCGATGTCATGA GAAT ATCAATG TTTA CGGTTCTATCC A GAATATCTTCAAAGGATTTA ATGAG  
AGCGG GAGT TCCCCTAG GAAA AAAAGTAA GAAT GAGAAG TAAA GAGGAGAGAGCCTGATATCC TATCCAA  
TGAGAAA GAAGCG ATCC TAAGTA TAAA GCCAAGGAGATATAGGCAGAT TTTA AGGT TAAAT CAAA GCTTA  
AACGACGTTTT CAAA AGAGAGCAGAGGGCT ATTC TCTCCGCC ATCC CTGATTC AAAAAATCGCTGAG  
TAAATTC TCGAGAAA ATGGAGAG GAAA AAAGTTGCGGAGACATAGGCCACCTACTAA GAGT ATGAAC TAAA  
ATAATC GGAT CAAAGAGCAGCAGAGGCTAATTGCAGTAA TAAA C ATCC TACTC CCCAGACAATGGCAGG  
GGT GATCGCGTTT TTTA TCAGGCGGT TTTT ACAGC GAATAAAA ACGCCTATCATGAAGGAAGC TAAA ATC  
GCTGCGATTGTATAGCTTACAGCAAGTGTAAATTGGGGCAAATAG GAGT AATCC AA GAATCC CGCCAAGCG  
CTTTA ACG TTTT CTGCTTGAGG GGAT GAGGAT AATCTTCTAATT GAATATGCAACTCTTCTCGGAGCAT  
CGTACTTAAAGAGAAGAGAG GAGT CGGAACACACAAAATCGAGCA CAAA TGAGATCAGCGGCTCCT GAAT  
CCTTGA CAAA CATAAA GCACCGCTA ATTC TATGCGTTCTTGTCT GGG CAAA TCTCGATCTC TTTCTTTT  
CCTGTAACATA TTTT TATGCGTCAGTTCTATGTAGGCCATGCTGCTTGAGCTCGCTTACAGCTGGTATA  
AAAAATCCAACTGATCC CAGTTGC GAAT AGGAT TTTT CATAAGAGGTTACTG GGAT TGCAGGGACTAGA  
AAGAAGATGGTGC GAA TAAAAAATAGAACAACACCACAATCAATAGCATCACAAGTCAGGTGATACCAAT  
AACCTTTT CAAA TCTGATGAGGCTCTCC CAAA CAGAC TTTA TGCAAATCTTGAAC TTC CAAA ACATGATC  
CTCCGAGATAAGTTACCGAAGTGCTCGT ATTC TGATGCCATCGTGCCGCTCCTCTAGC TTTT TATCTCA  
CTATAAGTTATCTTACCCT CAAA GGTAGGAGAAT CTCTTGGTT ATTC ATATAGGGCGAAGAACAGAAG  
GAAT GACGACAGAGCC ATCC GCTTGCTGATAAT TTTT CATAA ATAGCGACCAACAATCTTGGCGTTGCCAA  
TCCAGAGCCGTTT A GAGT GTTAACGAAGTGCAA TTTA CCTTGAGCATCTCGATAGCGTG TTTT GGAT CGT  
CGAGCTT GAAA ATCTCCGCA TTTAGAAA TAGAGGAGACTTCATAGAACGCTT CAAA TCCTGGGAGCCACA  
CTTCTGCATCGATCGT TTTT TAGCAGT GAAT GACATGTCTCCTGTG GAAA GTAAG GAAAGCTGATAGGG  
GAGT TGCAGTTCAGACAGA ATTTT TCCACAACATGAAGCATT CAAA ATAGACA ACTTCTTCTTGTTC  
GGAGT AGT GAAA GCAAAC ATTTT TAC CAAA TGGAACTGATGG ACTC GCACAAGTCTCGTTCTGAGCTC  
CTCCAGCGCCAGCCTCTCTGCGGAAGCAGG GAG TAAA TGCAGCATAACAGAGAGGGAGATCTTGCTCAT T  
TAGAA TTTT TTGA GAAT GAATCC ATTGAGGACGACTTCTGCTGTCG GGAT AAG GAAA AGAGACCGATCT  
CCATCC TCAACACGGTAATACTGTCCATCGAACTTAG GAACAAA TCCTGAACCGAAGAGA GAAT ATCTCG TT  
TAA CAAGTAAGGGAGGGAGCCACAATT GAAA GCCATGTGCTTGTCTG TTTATTC AGAAGATAAGTAAGCAG  
AGCCC ATTC TAGAAGA ACTC CTTTATTACAATAAGCCGGCCAGCCAG ACCCTGTAGT CAAA GCAGGGAGT  
TTAAA GTC TAAA CAAA CAACGCTTCATTAAGTTGCATATGGTG CAAAGGAGG GAAA GAAAAGTAGGTA  
CCTCACCGTGGCT TTTA ATCA CAAA G TTTT CTGT TTTA TCAGGA GAAA CTGGAACATCTTCATCT GGATA  
ATTAGGCAGTCTCGCATGAGATCTTCTAGAAGTGCTTCTGTCTTTGCAAAGTTG TTTT CAAATGCAACG  
AGT TGATCTGCAATAGT ATTC ACTTCTT GAAT CAAGGCGTCAGCAT TTTT GTTAGCAAC TTTA GC TTTAT  
GAAT CTGACCAGATAATACCTTACGC CAAA CAAGCAGAGCTTCT GAATCCGCC TTTA ACTGACGCACAGT  
TTT TCC AAGTCTAGGAGGCGTTC TAAAGAAA TAGCG GGAT CT TTTT CAAA AAGACGGC TTTT GCACTCT  
CAAA GTTCTTGGCTATTAATCGTAT ATCCAAC ATCC TTGCATCTC TTTT GCTATCTGATT TTTT AGGTT  
GAGT ATATGGAAGT CAAA TCTGAGCAACA ACTGTT TTTA TGCGCAAAGCCGTTGCCTTAGGAGAAA AGG  
GAAGGAT CAAA CTCC ACCAATCC TT GGGT GGGAT GTGTGATTG TAAAGAAT GGTTGTGTGATAGGTGA  
AGGTTGGCATCAAG GAAT CGGTTCTCTCATGCAGAGGTGTGCGCAGTTCAAGATCAAAAATGTTT TTTA  
GAAGGAGCTGAGGTGTATGTC ACCC TAGAACCATGTTGTCA TTTT GGTAGGACGCCACCTTGGCT GGATC  
TTTAT TAAA AGTAAGGTTGCTGCAG TTTA TGTGCTTACTAG ATCCGGATCC GCGTG CAAA TAAAA

AGGCGTAGCCCGCAAACAAGCAGCAGGGATTC CCGTTTATGTTGGGTAGGAGTCAGGAGGCCAAACT  
TCCAAACAACCTTATCTGTATCAACGAGAGCGGGATGCCATGGGTAGTGATGAAACACAGCAGCTTCGC  
TAGATGGTCAGACCGCAGATCGAGGAGGATCATCGCAATGGATTTCCAGGAGAATAGCTCGGGCGGATGT  
AGGGAAACTTCGTGCAAGTCTCAGGCTATAATTGTTGGGGCTCGTACCGCAAATTTAGATAATCCGCGC  
AAATCGGCACGGTTCCTCATGGGATTTATATGAAAGACAGCCATTAAAGTAGTGTTAGATAGTTCGCG  
GAACAGTCCCATTA GAATCTAGGGTATTCGATCTCAGCTCAGGAGTACGCTACAAACTACGACTCAACA  
GTGCCCTAAAGAATATATTCAAAAATTGAAAGA TTTAGGAGTAGAAGTATGGGAATCTTCTTCATCAG  
GTCGATCTCAAAGGGCTCAAAACGCTATCTGGCAGAGAGAGGGGTGTTTACAGGTGCTTGTGAGGGTGGCG  
CGCAGCTACACTCCGCTTTCTGGCAACAGAAGCTCGTCAATGCAGGGTCA TTTATTGGGGGCCGAAGTT  
CAAAAGTGATCAAGGGCAACCTATGTTGCGAGATCTCAGCTAAGTCTGGTTACAGCAGAACATGTAAGG  
ATTACAGAACTTC TTTAGTTAGGGATTCGTAAAA GACATGTCAAA AATGCAAA GAGCAAGAGAGTGTAG  
ATAAGAAGGGTTAGGGTTCGCA GAAAGTAGAGGCAAA TGTATACTCTGCGCACAGCGAGGGGAT TATAGA  
CAAAGAACGTTTCCACTGGCTAAGT TTTCTCAAAAACGGGGTAGATTGAGAATGTTTACATATGAAGC  
TGGGATAGCGTTCGGTACAGCAAGCGA TAAAAGATGTCGCTGAAGG GAAACAAATCATAGTTATTGATGCA  
GCATCTCGA GAAACGAAGGAGACTTAATCC TTGCCGGA GAAA AAGTCTCTACAGA GAAAATGAGT TTTT  
T TTTATCC CACACGACAGGTATTGTCGTGCTCGCTCTCTCGAGAGCAGGCCAAAATC CAAAGACTTGCC  
AGCCATGGTTCAAGACAACCAATGTGCG TTTAAA ACCGCTTTTACCG TTTCCGTAGATGCTTCTTCAGGA  
GTGACTACAGGTGTGTCTGCGAGT GATCGCACCAGAACTGTGCAAT TGTAGCTGATCCGGCAGCGACAG  
CCGAGTCC CAAATTCGACCAGGGCATGT TTTTCC CAAATCAGTCAACCTGGCGGTGTAGTTCAACGTCC  
TGGGCACACCGAAGCTGCTATGGATCTCATGCGCTTGCAGGTATGCAGCCGTGTGGTATT CAAACTGAG  
TTAGTCAATCCAGACC ACTCTATGATGCGACAGCAGGTA CTCTGCT CAAACTGAGCAACATGA TTTAA  
CTGTTATTACTGTAGATGACAAA ATTACTTATCGATATACCTATGATTCCTCGTTAC TAAAATCTCATC  
GGCGGATTACCTAC GAAATACGGAGATT TTTT AATCTATG TTTATGAGTCAATCATCGATGGGACCCAG  
CAT CAAACATTAGT TAAAGGAGAT ATCCATGAACAAGAAGCTGTTCCAGTGCCTGTGC ATTCGGAATGTC  
TGACTGGGGATATTC TGGGGTCTTGTCTGTGATTGTGGAGCACAGCTAGATATGGCGATGCGGTACAT  
AGCAGAAGAGGGGCTGGGAGT TATTGTGTATCTTCGAGGCCAAGAGGGGCGCGGTATCGGT CAAAGACAT  
AAGATCCGCGCATATGCGCTTCAAGA TTTAGGGTTATGATACTGTTGATGCGAATCTTCAATTAGGGT TCC  
CTATAGATGCTCGTGAATATGGCATGGCTGCTCAGGTTCT TAAA GACCTTCAGTTGACAAGCGTGAGACT  
GATCACCCATAATCC AAGAAAATTT CAAAAGTTACAGCGGTTAGGAATACACGTTCTTGACC GAAT TATC  
AAA CCGTCAAGTAT TTTCTACC GAAAATGAGGGGTACAACGAACAAAAAGGAACGCATGGGGCATTTGGT  
TAGATCTGCCCGTTCTGGATGATGTGGAGGAGGAGTAT GAAACCGTT GAAAGGATGTCCTGTGCTAAGG  
ATGTGCGTGTAGCTATTGTTGGGT CATG TTTCAATTCCTCTATCGCTGATAGGCTTGTGCTGGGGCGCA  
AGAAA CTTTT TTTGATTTTCGGAGGAGATCCTTCTCT TTTAACAATTGTCCGAGTCCCTGGGGCG CAAAAG  
ATTCCTTGTGCGATTAAGAAAATTAC TTTCCACCTCAGGACAG TTTCATGCTGTAGTTGCTTGGCGGAGTGT  
TGATTCAGGGCGAGACATCGCATTATGAACATATAGCAGATAGTGTGGCTGCAGGTGTTAGTCGCCATC  
CTTAGACTTCTGTCTTCCATTACAT TTTCCGTGATTACTGCTCCTAATATGGAAGCGGCTTGGGAGCGC  
GC GGGTATCAAAGGGCCCAATTTA GCGCTTCAGGCAT GAAACACAGC TTTAGAAA TGGCATCATTATCTC  
CTCTGATAGGGAAG GAATAAAACGGTGTAGAAA AAGAAGAACGCCTGATCAAATCAGGCCTTTTT CAAA  
TTA TAAATGGATACTAACGGTTCAT TTTAAGT GAA CAAA AACAGCGAC ATTCCTCG GAAAAGATATCCAAT  
CCTTGGAAGAAGCTGCAG TTTCTGAGAAATC TAAAACAATTTCTTAGAAA GAA CAAACTTGT TTTAGCA  
TTTCTTTATGCGC TTTCCAGACTC CAAACTACTAGCGATA GGGTAGTTGCATAAAACAACTGAGATCGAGC  
TTCTGCATTGGTATTGCCACGGG CAGTTCCGCTCAGTTC GGATACAAGTGTAGGCA ACCCTCGCAGAGAA  
AGAGCCAAC GAATCGCCCTTATTGGTATAGAAA CTATTGACCAAAGT ATCCGCTTCTTCTGTAGGAAGGG  
T CAAA AAGCTTGTGGT TAAAATCGCAGCTTCGGAAGGAGACAAGTTCATCAAGGTGGCC ATTC TTAC TAA  
AGCCATCTCGGATCGAGAAGAGCCATCAAATCC TAATCGATTAGCTCGGTAAG TAAAATAACGA GAAAAG  
GCCTCTTCTACAGTAGCGTATTGTTGCAACATGGACTGTAGAGGTGCGAAG CAAATGTGGAAT TGAGAGG  
ACATCC CCGTGTCTCCACAGGAATCC AAAGCATAGAGGTACAAGTCCAGAGCTAAAAGAGCTCGTTGCCA  
GCGCCAGCAGACAGAAGCT GAAA ACTTG GGGTGTTCGTCAGCGA GAGTAACTCATCGTAATTCGCCAAT  
TTTCTCAAGGAGAAGAAGA GAGT TTTCTGCTCCGGAGAGAGGCGAGCAAATGATGGGCTTAGCTCTGGGA  
AGGTGTGTAGTACATGCAGAGCCTTAGTG TAAA AAGTCTCTC CAAACA TTTCTGA GAAATAAGG TTTAAA  
CGCAGCAACAGCCTTAGTTGAACAGCCTAAGTGACGTAAGACGATAGCTGTCTCTAACACT TTTACAGAG  
TCA TAAAATTCCTTAGGG GAATTTAAA AATAGAGT TAATTGCTTATGCAATGCAAG GAAT TGCT TAAA TG  
TTAGAGGGGATTC GCTGGTCTGTAGTT GGATCAGTTGAGCATAGGCTTGGCGGGA ACCCTGGATTAATAA

ATGTAAGTGAATCAAACCTGCGCACTGCGATATCGAAAACGAGGGACCTTTTCAAAAGAAATAAATGTTGGAGAA  
AAGATGGCTCCTGAAGGAGATTTTAAAGAGGCTCCCGTAGAGGACGGCTCTACTAACCAAAAAAGCTCTG  
GATATTGGCGGACTTCAAATTCAATCCAAACTTCTGATCCAAATCAAATGGTTCGAGCTAGGAAGCGTTCC  
GCGAGTTGAGGTGCTGAGAAAACAGGGACACTAGACAGTGTGACAAGGAACAAAAGACAGTTGCAAAAG  
GTAAGGTTTATTAACATATGATCCCTCTGCTACTCCGGGCTTCATCCCTTCTTAATACGGATAGAGGG  
GTAACCTTGTAAGAGCTTAACGGGGAGTGTGTGGTTGATATCAATAGCCGGTGGCAAGCCTATAAAAG  
GGCGTTGCATAGAGTGTATTC AAGAAGCAAACACCCGTAGATTCTCTGGATTC CCCGAGAGATTC TACCG  
GCTTCATGCTAACATGATTTCAAAATTAGGGGCAAGGTTCTTGCAAAGATCTTTTCATTCCTACCCAGAGA  
GGATAGAGAGGGATGTTAAGATTTTAAACAAAATTGGGATGTTGAAGCGCCTTTATAAACTATTTAGTTA  
ATAAGA CAAATGCTATAATACTACAAA TTTATT TTTAATCAAAGCAGGTTTATGAAA AAGTTTATCTATA  
AGTATAGCAAAGAGCTCTCTTGTGCTCTCCGGGCTCTCCGGAT TGAGCAGCTGTTGCGCCAACCTCTTA  
TGGATCGACTCTTGCAAAAAATACAGCCGAGATAAAAGAAGAATCTGTTATACTTCGCGAGAAGCCGGAT  
GCCGGCTGTAAAAAGAAATCTTCTTGTACTTGAGAAAATTTTTC TCGCGCAAAGAAA CTTAAAGAGAAGA  
CAGAGCCTGTGTTGCCGAAC TTTAAGTCTTACGCAGATCCAATGACAGATTC CGAAAGAAAAGACC TTTTC  
TTTCGTAGTGTCTGCTGCTGCTGATAAGTCTTCTATTGCGAAA GCTATGGCTCAGGGGAAAAT TAAAGGC  
GCATTATCGCGTATTAGAGAGATCCATCCCTTGCATTGTTACAAGCTCTTGCAGAAGATCCCTGC TTTAA  
TTGCTGGAATGAAA AAGATGCAAGGACGGGAT TGGGTCTGGAATATC TTTATCACAGAATTAAGCAAAGT  
TT TTTCTCAAGCAGCATC TTTAAGGGGC TTTACGCTTGCAGACGTTGCCCGCTTCGCGTCGACCTTAGGA  
TTAGACTCGGGGACCGTTACCTCAATTGTTGATGGG GAAAGGTGGGCTGAGCTGATCGATGTCGTGATTC  
AGAACCCTGCTATA TAAAGGCCATTC TAAAGGCCCCCTTCCCCCGGATAGGAGAAA GGGGGCTCAAATAT  
TTTC CGCTTACAAACCTCCGAAGCGGGT GAAAGCATAAGAGTAGTAGGACAATGTTACAGTT TTTAAAGC  
AAATCAATCACTT TTTA ACTTCTTCAAATGTATTC CCAAATTC CAAACAAA GGAGGGATACTA ACTTG  
GAAA TACGAGGGCTACAG TTTA CTTC TTTAGGAATGAGCTTTTC GCTTGATGCTGAATAATCAACAGGAA  
CAAGCTGGTGCAGAAGGAGAGGGGGTCTCGCGCTATGAAGCTGTAGCAGGTATGTTAGCAGGGAAC CAAA  
GTACAGGGAATATTGCAGGGATGGCGATTGCTGTCGCTAGTGGAGGCCCTGGGGCATTAC CAAAGATATG  
GATCGTCACTCTTCAAACCTGCAATAGTCCAGTATGCAGGCGCTTTTCCTTGGATGTAAGTACC GCCAGTTC  
CAAAAGGAATCC CAGGAGTATATCGGAGGACCGATAGCTTGCCCTAGGATATAAAAATGGGCAGCCGATTC  
TGGCTGTTGCCTCAAATGTCGCTAGCTTGATCACAGCATTTTC TGCAGGGAATTTA GTTCAGGTTAACAG  
CATTATCTCTCAAATGCTGATGGGGTCTCAGCGAAGATCGCAGTAGGGATACTGCTCGCGCTCTCTGTT  
TACCCAT TTTAGCTGGCGGAAATACTCGAGTCTCCGCTTCTCTGCTAAAGCGATTC TTTTCGTAGCAG  
GATTCATTTTCCTTTTC TCCGTTATAGTCAAAGCTATGCATTGTGATAAAAATTC TTCCTGC CAAACAGCT  
CGT TTTCTCTTCTGCTTTAGGGTGTCAAGGCTGGATAGCCGGGGT TGGGGGCTATACATTAGGACAGGTA  
ATCTCTACAGGAT TAAATCGTGCTATTATGGCTACAGACGGTGAAGCGGAATGG TTTCTATTC TGCAT  
CTAATTC TAAAGCACGAATCC TGTGACAGACGGAT TAGTCACTCTCTTACCTCCGTTATCGTTGCGGT  
CGTATGCTCTATTACGATGATGGTCTTCTTGTGACAGGAGCCTATGATTC TGGAGAGTTAGGGGT CAAA  
ATGGTTATGAATGC TTTCAAATCTTCGTTAGGCATGTTGGGCGGAAGTGTGTTCTTATATCCATGATCT  
TG CAAA GGTATACTACAGCTCTGTCAATG CAAA CTTCGCGA GAAA AAAG TTTA GAATATATGATCC CAGG  
GAAGCGCGTAACCTATTGTTGAAGGCTATTTA TATCGCGATAATCC CATGGGTGGTGTCTTAGGAATG  
CAG TTTATCTGGGCGCTATCCGATCTAGGTTCAAACGGGATGGTTATT TTTAATTC CATCAG CAAA ATCG  
CCTTGTTCAGAGAAGTAATTGCC ACTCGGTATGAGGTAGCCCTTCTCCG TAAA GAAGCGCAAGCCCAGTC  
TGATCC ACTACGACAGTAGTACAA GAATAGGGCCACGC TTTA CAGAGCATGGCCC TAAA TACAGGAGACC  
TCAATTATGCAACTCACCTACAAGCTT TTTCTTACGGCCGTCCGATTC TAAA AAGTATTC GTGTCAGG  
GCGTTGGATCTCCCACCGCTGTCTT TTTCTGATGTCCCTAGAGAGGC TAAA AGTCTTGTCTTATTGT  
TGAAGATCCAGATGTTCTCCTAGTGTTCGAGA GGATGGGT TGTGGATACACT GGATAGTGTATAATCTT  
TCGCCTGTAGTCTCTAATCTTGCAAGAAGGAGCACAAATT CAAA CTGTCCAAGGGT TAAA TACTGCTGGAG  
AAA TAGGATACTGCCCTCCTTGCCCTCCAGATGCGAAGCATCGCTATTACT TTTA TGCTTATGCGCTCGA  
TGTTGTGC TTTCCGATGAAGAAG GAGTGACCAAAGAACAGCTGTTAGAAGCTATGGACGGACATATCATA  
GCTACGGCAGAGCTGATGGGCACATAT GAAAAAGAC TAAATCAGAGATTATTC TTCTTGGGGAAC GAATT  
CCTCTCGCTTTTA CGGTGCTTCCAATACAACGGACCATAGTGATAGCAGAGCTCTTCCCCAGGAAGAAT  
GTC CAAA ATTGCCC GAATGATAATATGGAATATCC CGT TTTCAAAGGCCCGATCGCTTCTAGATTAGGG  
TTGTCACTGTGATTAA TAAACC GAGT CACATTTCTTGTCATCC CGCTATCAATAGT GAAATAGCGGAACG  
AATAGCGGGGACC GGGTAGCG GAAA CAGTAATCGT TTTCATCTAGCCAAAGAGCCTGTCTTCGACGCAA  
AATCC CTGTATATTC TCCGATGTAGCTCCATGCCG GGATGGATTC ACAGCAAAGACTCCATATCC TACA

TAGGAATTAATCCAACAGATGGCCACTGGAGGATTTCAAAGAGCGCGGAGATGTTGCTTATGGAGCTGCC  
CTAGCCA AAAAGCTAGAGAGGAAA CGGC TAAACGTTTTC TTCTCGATAACATAATCGTTGAAT GCGTTG  
CAAA ACCGCAGCAT CAAA GAAT TGTAATTCAGGAA GAAATGAGAACTGCAAAAAGTTGTTCAACC TTCGT  
ACGGGATAGGGAATGGCTGAGTCAATCCCTCCGTGTAACGAGAGATACAAAAGTGTCTTGAGTAGAGTTAG  
TGGTCATACAAGGCTCGGAGCAGAAAAGAAAATA GGATCTGTAATGCCAGAAC CAAAAGCAATTACGGGA  
TGAACATCTGTGATCTCTTGAATGGCAGACGTCCTGTATTC AAAAGCTTGCTCTGCCGATTACATTCGA  
GAGAAA GATGTGCAAGA TAAATCTTCAAATTCGAGGAGTGAGAACGCGTTGAAGTAGAGCGCCGACTC  
CGCATTCGAGATATGGCCTTGCTTGCTGAGAATGCGTTG CAAA CAGCTCTCTGGTCGTGAGGATCGGAGA  
ACCAATTC CGGATCATGGTTGGATTC TATGAGTAGGTAGTCGCAATCACAGAGAAGGTGTGTAATCC AAG  
AGGTGACCCATCC TAAATCCGTGCAAAAACC GAGTTC ATACCA GAATATTGAAA GA TAAACCC TACGGG  
ATCCACTGCATCATGCGGAACAT TAAACG CAAA CACGCGGAGATCTTC TAAAGAAA AACGATGCCAGTT  
GTAAA GAT TTTAAA TGTCGGACACAGATC TAAAAGTTGCCGTAAGCTGCGCGCTG TTTCTATGTTACATA  
TAATGGGGTTCTATAGGT TTTAA TAAA ACTACGAAGCCCTGCAATGTGATCCGAGT GTTCATGGGT AAC  
AAAAATCCCTTGAATATCTTCAGGGTGAATGCCCATAGAATGTAAGGCCTCGGTAACGGCTTG TTTACTA  
ATCCCAAGATCTATTAGTAATTTA CATGACCTTGTTCC TAAA TAAGCACAGTTCCC CAAAGAACCAGAGG  
CTATAGG GAAAAAACCTTCCATGGATTAATCGTCTG CAAAATAAATGGACTAGTA CAAAACGCGG TTT  
AGCTCCCTCTGAGGGCCCCACGATTC TAGCTTCTCTAACTGGTCAATGATGCTAGCCGCTCTAGCGTAA  
CCAAT CAAAAGT TTTCCAAAGAGGAAA GTTGTGCGAGGCA TTTCTGTCTG TAAAACAAGAGT TTTA GCTT  
GGT TAAA TAATGGATC TAAATCTTCAGGATCC ATAGAACCTGGATCGTCATAGGTAT TAAAAGAAGGGAT  
CACATA CAAA CATGG GAATCTTGAACA TAAATC TTTAATGAC CAAA TTGATGTCGTCATCGCAAAATATAG  
GCGCCTTGAACACGAACAGGCGCAAAAGATCC TGGAGAAA CTACTAGCATATCC CATTCCCATCAAGT  
TTTC GGCTCCGGGCTCATCAATGATAA CAAAAGCTATTCAC CAAA TTGGCAAC TTTAAA GCGGATTC GAGA  
AGGGAAG CAAAC CAAA ATTAATCC TGTGATCACATCTCGAGAAGGCGTTGTGTTGCTAAGATTAGGTGG  
ATTCCTACAGCTCTAGCCATCTGAGCTAAGCGTACAATAGGCG TTTGATATCATGAGAGGAA GAAA GAA  
GTAAA TCAGAAA GCTCGTCAATGATGCCAACAATAAA CGGCATTT TTTCTGGGATCTCTTTATCGTACGA  
AGCTTCGATATCCACATTGCGAGT TCGAGAAT TAAA GGATTGGATG TTTCTAGCCC TAAAATCGAAGA  
ATTTCTATAACGTAGTTCCA TTTCTCGAACAAGCCAAAT TAAA GCGCTATGGGCTTC TTTAGATTCTGTGA  
TAACAGGAGTTAGCATATGAGGGAGT TGC GAGTATCC TGTAACTC TAC TTTCTTAGGATCCACGATTAC  
GAGT TTTATGTCTGTAGGGGGAGAAGTCATAATAAGAGACATAACAATCGTGTAAATGCAGACAGATTTCT  
CCAGATCCAGTGGTTCCTGCAATAAT TAAATGGGGCATGGTTGCCAAATCTGTCCAAAAGTTATCGCCAT  
TAGCT TTTCTCCCGAGAAGAAGAGGAACCTGGAGT CGTTGTGTCTCTT CAAA GTAATCTTCTAA TAAATC  
TCGGAAGTTAACGGGCTGAGGATCTGGATTGGGGA TTTCAATTCCTACCGCAGC TTTCCAGGGATAGGG  
GCGATGATGCGGATGCTAGAAAGCTTGCAAGTTCAATGCAATATCAT TTTCTAAA GC CAAAATTT CAAA TA  
C CAAA ACTC CAGTGTGGGGAGGACTTCAAAGGCGCAAGGGT GGGCCCGAACAAATGTTCCCAATAGC  
AGCTTCTATTC CAAAGCTAGCCAATG CAAA CTG TAAA ATAGCAGC TTTCTTT TTTAATTC TTCCAAGAGA  
GATTC TGGGCGGCGCAC ATTC CGCTT ACTCAAGAGATGGTATTGTGGTAAGTCCGGGGCGTCTCCTGCTA  
GTACAAATGGGGATGGGGTAGG TAAA GGCTTGTAAGATG CAAA TGCAGGAGCTGAAGCC GAGTCTTTCTGG  
CAAAAGATTAGGAAGATCAGTTCTTT CAAAAGGCGATAATGTTCTT CAAATC GGATGCGGTGGGGT GAGA  
AAATGGTGCGGTTCACAGAG GAGT CATCGTGTAGATC TTTAT TTTCTCAGAGGAAGC GAAATCACCGGG  
TTGGAAG CAAAAGCA TTTCTTT TTTAGCAACAGAAGGCGAAGATGGAACGCGAAGAGAGGGTTCGGGGAC  
ATAAGACTTATTGTTAACAAGATTT TTTAAAAGCTT CAAACAGGCGTTCCAACATGCG TAAAA CAAA TTC  
AAAAGAAA TTTA GGAGATCGTCTAGGAGAGCTTTTTTT TTTAACACAAAAGA TTTAGGATAGATAAAA  
AGATCGGCATAGCAATATGGCCA GAAA GATTAATCC TGTTCCCACTGCACCAATTAACAGT TTTAAAGA  
AAAAGAA TTTCCATCGTACAGTAAG TAAAACG GAATGCCCCCTAGGTACGC TTTAGGAGGTTGAAGATCC  
ATGACAACCATGGGCACTCTGTAGC TAAAAACTGTGGAAGGT CAAAAGCTGGAGAAA TCATAGACAATA  
ATACTGCGCAACAAAACCGAAT TGCGCCAAAAGCTGCTGCT TTTCTAAAAGC TAAA GGAGCTG GGGT TCT  
CTTCATA TTTAGAAA GAAAGCC ATCC AAAATTTA GGGGGATTAAA AAGGCAGCGACACCAAAGTTATAT  
AGCAAGAAGGAGCTGAGAGACCAGCC GAGTAAA CCTATCCAGT CAAA TGTGTAAGGTTGATTATGTTGGA  
AACTC CATAGACTTAATCCAGAGAAA CAGGCTAGGGCTAGATACACGCATGT TTTACAGCAAAGACTGC  
AAA TGGAGAAA GAGAAA CGCTTGC TTTCTTCCGTTCT TTTCCATAGTTCTCTCTCTTATCTAACTGAT  
AAGGACTCTTAACA GAAA TAGCGCTTATATGGAGGTGTTAGCCTATCATTGCGGAAGCTCTCAACGATCC  
TAGCACTC CAACGCACATGTGTAGCTTGTTATAACAG GAAAA TAAA GAATCGAAGTAGTCTT TTTAGG  
AAA CTA TAAA GAAGGGCGAACGACG GGGTTCGA ACCCGCGACCTTCGGAACCACA ATCCGACGCTCTAAC

CAACTGAGCTACGTTCCGCATGGT GAAACTC CCCAACTAGCAGAGCGTGCAGGCGCTCTACGTTGGG GAA  
AGAGAAGTATAATGAAGAGATTGTT TTTATGGAAGATCAAGGT GAA TAAAATC TAAA GCGGTGTT CAAAA  
AA AAGGAAGCGAAGATGCAAAAAAAAAA GAATTTTC GACAAAAAATCGAAGAGAGGAA GGGTAGGATGAGC  
AAAAAAAAA GAAA AAAAGAGAG GAAA AT CAAA TTTATAAAAA GGGT TGAGGAT AGTGTGTGAGG GGATAA  
ATTGAGAGGTTAA GAAA AA GGGT TT CAAA GG GAGT TGA TAAA AAATAGGTGCA TAAA AAATAGG GGGTAG  
CATAAGATGTAGC TTTCTTTTC GAACGAAGGTTGAAGGAAGGCTCTTACGT GGAT GAGAGGGCGCGACAG  
AGT GGAAGGCTGAGAGGCTGGAAGCT TTTCTTAACAATGCAAATGAGATAGAAT GCAGGCCAGTATAGAT  
GCTTGTGA GGA TTTCTTAAGAGATTAAGGAACCC GTTAA TAAA TCAAAGTATATATT TTTCTGAGAA CAA  
AATCTTGGTTT CAGATTGAACGCTGGCGGCGT GGAT GAGGCATGCAAGTCAACGGAGCAATTG TTTCTGGC  
AATTG TTTAGTGGCGGAA GGGT TAGTAATGCATAGATAA CAAA TCCTTAACTTGG GAATAACGGTTG GAA  
ACGGCCGCTAATACC GAATGTGGCGATA CAAA GGC ATCCGAGT AACGT TAAA GAAGG GGAT CTTAGGACC  
TTTCTGGTTAAGGGAGAGT CTATGTGATATCAGCTAGTTGGTGGGG TAAA GGCC TACCAAGGCTATGACGT  
CTAGGC GGAT TGAGAGATTGGCCGCCAACACTGGGACTGAGACACTGCCAGACTC CTACGGGAGGCTGC  
AGTCGAGAATC TTTCTGCAATGGACGGAAGTCTGACGAAGCGACGCCGCGTGTGTGATGAAGGCTCTAGGG  
TTG TAAA GCAC TTTCTGCTTGG GAAT AAGAGAAGGCGGTTAAT ACCCGCT GGACAAA AGCGTACCAGG TAA  
AGAAGCACCGGCTAACTC CGTGCCAGCAGCTGCGGTAATACGGAG GGGT GCTAGCGTTAATCGGA TTTATT  
GGGCG TAAA GGGCGTGTAGGCG GAAA GGTAAGTTAGTTGTCAAAGATCGGGGCTCA ACCCCGAGT CGGCA  
TCTAATACTATT TTTCTAGAGGGT AGATGGAGAAA AGGGAATTTCTACGTGTAGCGGT GAAA TGCGTAGAT  
ATGTGGAAGAACACCAGTGGCGAAGGCGCT TTTCTAATTTATACCTGACGCTAAGGCGC GAAA GCAAGGG  
GAGCAAACAGGAT TAGAT ACCC TGGTAGTCCTTGGCG TAAA CGATGCATACTTGATGTGGATGGTCTCAA  
CCCCATCCGTGTCCGAGCTAACCGGTTAAGTATGCCGCCTGAGGAGTAC ACTC GCAAGGGT GAAA CTCAA  
AAGAATTGACGGGGGCCGCACAAGCAGTGGAGCATGTGGTTTAAATTCGATGCAACGCGAAGGACCTTAC  
CTGGG CAAA ACATGTATATGACCGGGCA GAAA TGTCGT TTTCTCGAAGGACATATACACAGGTGCTGCA  
TGGCTGTCTGTCAGCTCGTGCCGTGAGGTGTT GGGT TAAAGTCCCGCAACGAGCGCA ACCCTTATCGTTAGT  
TGCCAGCACTTAG GGGT GGGAACTC TAACGAGACTGCCT GGGT TAAACCAGGAGGAAGGCGAGGAT GACGTC  
AAGTCAGCATGGCCCTTATGCCAGGGCGACACACGTGCTACAATGGCCAGTACAGAAGGTAGCAAGATC  
GTGAGATGGAGCAA ATCC TCAAAGCTGGCCCCAGTTC GGAT TGTAGTCTGCA ACTC GACTACATGAAGTC  
GGAAT TGCTAGTAATGGCGTGTGAGCCATAACGCCGT GAATACGTTCCC GGGCCTTGTACACACC GCCG  
TCACATCATGG GAGT TGGT TTTA CCTTAAAGTCGTTG ACTCA ACCC GCAAGGGAGAGAGGGCGCCCAAGGTG  
AGGCTGATGACTAGGAT GAAGTCGTAACAAGGTAGCCCTACC GGAAGGTGGGGCT GGATCACCTCCT TTT  
AAGGATAAGGAAGAAGCCTGAGAAGG TTTCTGACTAGGTTGGGCAAGCATT TTA TATGTAAGAGCAAGCAT  
TCTA TTTCA CAAA TGTGTAA GAGT TAGCGTGGT GAGGACGAGACATATAG CAAA TGATCAAGTATGTTA  
TTG TAAAGAAA TAATCATGGTAACAAGTATA TTTACGCATAATAATAGACG TTTA AGAGTACAAA TCTT  
TTA GGTGAAGTGTGTCAT GGAT CTATA GAAA TTACAGACCAAGTTAATAAGAGCTATTGGT GGAT GCCT  
TGGCATTGACAGGCGAAGAAGGACGC GAATACCTGC GAAAAGCTCCGGCGAGCTGGTGATAAGCAAAGAC  
CCGGAGGT ATCCGAAT GGG GAAA CCC GGTAGAGT AATAGACTACCATTGCATGCT GAATACATAGGTATG  
CAAAGCGACACCTGCCGAAT GAAA CATCTTAGTAAGCAGAG GAAA GAAA TCGAAGAGATTC CCTGTGT  
AGCGGCGAGC GAAA GGG GAATAGCC TAAA CCGAGCTGATAAGGCTCG GGGT TGTAGGATTGAGGATAAAG  
GAT CAGGACTC CTAGTTGAACACATCTG GAAA GAT GGAT GATACAGGGT GATAGTCCC GTAGAC GAAA GG  
AGA GAAA GACCGACCTCAACACCT GAGT TAGGACTAGACACGT GAAA CCTAGTCT GAAT CTGGGGAGACCA  
CTC TCCAAGGC TAAA TACTAGTCAATGACCGATAGTGAACCAGTACTGTGAAG GAAA GGC GAAA AGA ACC  
CTTGTTAAGGGAGT GAAA TAGAACCT GAAA ACCAGTAGCTTACAAGCGGTCGGAGACCAATGGCCGTAAG  
GGT CAAGGTTGACGGCGTGCCT CAAA CATGATGAGCCAGGGAGT TAAGC TAAA CGGCGAGGTTAAG GGAT  
ATAC ATTC CGGAGCCGGAGC GAAA GC GAGT TTTAAA AGAGCGAA GAGT CG CAAA G TTTAGACAC GAAA CC  
AAGTGAGCTATTTA TGACCAGGTTGAAGCATGGG TAAA ACTATGTGGAGGACCGA ACTAGTACCTGTT GA  
AAAAGG CAAAGATGAGT TGTGAATAG GGGT GAAA GGCCAATCAAAC TTGGAGATATCTTGTCTCTCC GA  
AATAAC TTTAGGGT TAGCCTCGGATAATAAGCT CAAA GGGT TAGAGCACT GAATTC TAGCGGGGGCCTAC  
CGGCTTACCAACG GAAA TCAA ACTC GAATACCAGAAGC GAGT CCGGGAGATAGACAGCGGGGGCTAAGC  
TTCGTTGTGCGAGAGGGGAACAGCCAGACC GCCGATTAAGGTCCCTAAT TTTA TGCTAAGT GGGT AAGGA  
AGTGATGATTC GAAGACAGTTG GAAT GTTGGCTTAGAGGCAGCAATCA TTTAAA GAGT GCGTAACAGCTC  
ACCAATCGA GAAT CATTGCGCCGATAA TAAA CGGGACTAAGCA TAAA ACCGACATCGC GGGT GTGTGCGAT  
AAGACACGCGGTAGGAGAGCGTAGT ATTCAGCAGAGAAGGTGTACC GGAAGGAGGGCTGGAGC GGAT ACT  
AGTGAAG ATCC ATGGCATAAGTAACGA TAAA GG GAGT GAAA ATCTCCCTCGCCGTAAGCCCAAG TTTCTC

AGGGTCAAGCTCGTCTTCCCTGGGTAGTCGGCCCCAAGTTGAGGCGTAACTGCGTAGACGATGGAGCA  
GCAGGT TAAATATTCCTGCACCACC TAAACTATAGCGAAG GAATGACG GAGT AAGTTAAGCACGCGGAC  
GATTGGAA GAGT CCGTAGAGCGATGAGAACGGTTAGTAGGCAAATCCGCTAACATAAGATCAGGTCGCGA  
TCAAGGG GAATCTTCGAGGAACCGATGGTGTGGAGCGAGGC TTTC AAGAAA TAA TTCTAGCTGTTGAT  
GGTGACCGTACCAAACCGACACAGGTGGGCGAGAT GAATATTC TAAGGCGCGGAGATAAC TTTCGTTA  
AGGA ACTC GGCAAAT TATCCCGTAACTTCG GAAT AAGGGGAGCCT TTTAGGGT GACTATGGAACGATAG  
GAGCCCCGGGGGGCCGAGA GAAA TGGCCAGGCGACTG TTTA GCAAAAACACAGCACTATGCAAACCTC  
TAAGGGGAAGTATATGGTGTGACGCC TGCCCAATGCCAAAAGGT TAAA GGAT ATGTCAGCTG TAAA GCG  
AAGCAT TGAACCTAAGCCCTGGT GAAT GGCCCGGTA ACTATAACGGTGCTAAGGTAGC GAAA TTCCTTG  
TC GGGT AAGTTCCGACCTGCAC GAAT GGTGTAACGATCTGGGCACTGTCTCAAC GAAA GACTCGGT GAAA  
TTGTAGTAGCAGTGAAGATGCTG TTTA CCGCG GAAA GGAC GAAA AG ACCCCGTGAACC TTTA CTGTAC CA  
AAGTAT TGGTT CAAA G CAAA TTATGTGTAGGAT AGCCAGGAGACTAAGAACACTC TTCTTCAGGA GAGTG  
GGAGT CAACGTT GAAA TACTGGTCTTAACAAGCTGG GAATCTAACATT ATTC CAT GAATCTGGAAGATGG  
ACATTGCCAGACGGGCAGT TTTA CTGGGGCGGT ATCC TCC TAAA AAGTAACGGAGGAGCCCAAAGCTTAT  
TTC ATCGTGGTTGGCAATCACGAGT AGAGCG TAAA GGTATAAGATAGGTTGACTGCAAGACCAACAAGTC  
GAGCAGAGAC GAAA GTCGGGCTTAGTG ATCCGGCGGTG GAAA GTG GAATCGCCGTCGCTTAAC GGATAAA  
AGGT ACTC CGGGGATAACAGGCTGATCGCCACCAA GAGTTCATATCGACGTGGCGG CAAAGCACCTCGAT  
GTCGGCTCATCGCATCC TGGGGCTGGAGAAGGTCCCAAGGG CAAA GCTGTTCCGCAAT TAAA GCGGTACG  
CGAGCT GGGT TCAAAACGTCGTGAGACAG CAAA GTCTCT ATCC TTCGTGGGCGCA GGATACTTGAGAGGA  
GCTGTTCC TAGTACGAGAGGACCG GAATGGACGAACCAATGGTGTATCGGTTGT CAAA CCAAGAGCATAG  
CC GAGT AGCTACGTTCG GAAA GGATAAGCATT GAAA GCATC TAAA TGCCAAGCCTCCCTCAAGATAAGGT  
ATCC CAATGAGACTC CATGTAGACTACGTGGTTGATAGGTTGGAGGTGTAAGCACAGTAATGTGTT CAGC  
TAACCAATACTAATAAGTCCAAAGACTTGGTCTT TTTA TGATTGGAAGAGCC GAAA GGCAAAGACAATAA  
GAAA AA GAGTAGAGAGT GCAAGTCCGTAGAAGACAAGCT TTTA AGCGTCTATTAGTATACGTGA GAAA CG  
ATACCAGGAT TAGCTTGGTGATAATAGAGAGAGG GAAA CACCTGACACC ATTC CGA ACTC AGAAGTTAAG  
CCTCTGATCGCTGATGGTACTATACACGA GAGT ATGGGAGAGT AGGTCGTCGCCAAGCATT TTTA TTATAT  
AAGATCTTAGTCATAGAC TAAA AAGGAGAAGGGGTAGCCGCTAACGCAGCT ACCCCT TTTCT TTTCTC  
TAAA ATACCTTCTCTCTTCTTCTTGTGTAATCC TAGTCAAATTATCTCTAATTC TCTACTATCTTCTTC  
CTT ATCC TTTA GAGCAT TTTCA G TTTA TCAAATA TTTCTCTT TTTCT ACCCT TTTA AGACTTTA GAATAC  
CATGCTCCTTAGAAT GGACAGAGGGATCC TGGGAT CATAACGGAA TTTCAAACAGAGGCCTGCTG GAAA  
GATCAAAGCATGTATGTAGGCTGCAGATGACTATACATGCAAGGAAT CGAGAAA G CAAA TCATTAACA  
AGAAG TTTAGCTCTT CAAAAA GCCTTGCCACAGTCTGTATGCTGATAGCAAGGGCTTATTAATTAACGC  
ATGA GAAAGAAA TTAGAAGCTATGAAGAAGTGTGTTAGAGGCTCTTCTTG GAGT GATGGAA GAAA GTTA  
GC ACCC TTGTAGCAGGTTAACTTCC GAAA TCATC TAAA ACAATAGAAGAGCGCTCAACACCATAATTATC  
TAACACGGTTAAGATGCTACTATTATGCAGAGCAGGACCGCAAACGTAATATAGATAATCTTCT GGATTG  
GGGAGATG ACTC AGTTGTCCAAGTTC GAAA GC TTTAAA CAAGAAA TTGGTT TTTA TAGGATCATTC TTAT  
CCCATCC TTGGTC TAAA TCTTCCCTG TAAA GGCTGAGAGAGAACCAAGTGATAGTGGAAGTTGGG GAATTC  
TTTC TCTAACTTCTCAT ACTCTTCTTGGTAGATAT TTTCTTTA AGAGAACGTGCTCCATAACCACAAAGTC  
AGTCTCTGTCA GAATG TTTATTC AACAG TAAA TCAA GAATATGGCTTCTTCCAAAAGAAGATCC AGCAC  
CTCCTATTAGGAAGATAACAGGACGGTTGTTCTC TTTCA T GAAA GACTCCCATAAGGCC GGATACCAT  
TACCTTATCACC GGG TTTCAGAGA GAATATATACGAAGAGCAGACTC CCAAAG GGATGGTC GGGT CGGGA  
GCTTGATCCACAAAAGAAGGGGT CGCGATCCGGACATT GAA CAAA ATCAAAGGAAGTTCTGCT GGATAAG  
AAGCTAGG GAATACGC TTTATTC GCAGAGT CGGTATC TAAA GATAGATTATCAATAACTTGGTC GAATAG  
ATG GAAA GTCTCCAATCACTATAGTATTGG GGATCC ATAGTCTGCTTCCAGTCCGAAGTATTGGT TTTA  
TAAGGAGGAACGGTAA CAAATAGATAGCCTCCAGG TTTAAAAG GAATAGGGCGGAA GGATCTACAGAAA  
GAACAAGTTC CAAA TAAA GGTAGCAAC ATTC TCG CAAA ATACAACAGT ACCC TCCCAAGAAGAAGCATT  
GAAA TAACGGTCTTCTACTTCTAAGCAGAGATCGTGTGTGAC TTTG CAAA GCAG GAAA GTCTCCATCCT  
TGTTCTAATTGCTGCTTA GAAA AGGTAGAACGATCTG TTTCTAATGGTTCATCAGC ATTC CAAA TAATGC  
GGAC CAAA CATTGCTTACAAGCAGC TTTCCCTCCACAAGGAGAAG GGATAGCGATTC CTGAATCTAATAA  
GGAAGATAGCAATGT TTTCCCGCTGTCTACAGTCTTAGTGAGG GAAT CATCATTTATTGATT TTTAGCTTA  
CAAGGATGCAC TTTA ATAAGGAA TTTCTG GAAA GCAGGATAACGGCGACAAGAAT AAGGTCTAAA GAAC  
AAAATGCTGCAGAAGCGACAAAGATA GAGTACAGGCCT GAAA GCCAAGTCATAATTA TAAAAATCC CTGG  
AA TTTCAACGAGACTGTAGCGTCAAGTTATAGGTT ACTCTA TAAA AAATCAACG GAGT TTTTAAA GT TT

TAATTACAAGGAAGCAAAGCCCAAGGACCTGGGC CAAACTGAAA GGAGCTCGTT TTTATTTCTCAGCTTTA  
AGAA TTTCTGAAA TAGCAGT TTTA GAATTTCAAT TTTCCCCGAGGCAATGTTGAGAATGACTGTGTGTT  
CTC GGATTTCCGCAATGGTGCCAACGATTC CCATAGCAGTTAC TTTATCTCCAACAGCTAACTCGCTTT  
TC TTT TTTCCATAGCTTGACGACGTT CAAATTCTGGACGCCACAAGA TAAAATA GAAA AAGACGATAGCA  
ATTC CTAACATGACTGCAGGTTGTCCAAACGTTGCGCGTTGAGGA GAATCC GTATCAGCAAATAGAGCTG  
GGCAAC ATCC TAAA AAGAACA GGATAC TAAAAAACAGACGC GAGT ACATCGAGGTGCCT TTTA TTAGGGT  
TAAAAA GGATAGGTTAACACAGGAAGATAGGG GGAT CAATCC TTTCCAGAAGAACAGCATTAG GAATA  
AGGC TTTCTTGT TTTA GAAA GCC TTTCTAAGAGCACAATAT TTTCCAAATGATTAGTATGCG GAAA CTG  
ATCAATAGGCTGCATGTGCCGTAGCTGAT ATCC TTGCTCTACAAGAACAGAGC ATTC TTGGACAAA TGTA  
AGAGGAT TGCAGGAGACATACAAATTTT TTTA GGAGCCATGCG TAAA AGGTAT TTTA AGGC TTTA TCAA  
ACATGCCGCAACGAGGA GGAT CGATGACTACAATATCTGGGGAAGGAAGGT TTTCAATCCG CAAA CAAA  
TTGT CAAA CATCTTCCAAAAACACTTCCAT ATCC ACG GAAT TAAGCT GAATAT TTTCTTGTGCTGAAGCA  
ACAGC ATCC GGGACTAGTTCG ACTC CAATAATTTT TTTACGTAAGGAGCCAG TAAA ATGCCGATAGTCC  
CAGCTCCGCAATACAGATCTAAGA GAGT CTCTTCTCCGCAAGGAT CAAT GAATTC CAAA ATAG CAAA AAT  
GATTT TTTCTGCTTGGAGGC CAAA TGGCTG GAAA AAGCTTCTTGGAC GGAT ATGGAAGAGACTAGAACGG  
CCATCTATCGATAATTGTTG CAAA AG GAAAGGAGCTCCGTATAGAT GAGTTGTCC GAAA AGGTTGTGGAG  
AGT TCCGTGCGGAGAGT TTTCTTCCAGAAA ATCGAAGTAATCGGTAGTCCA GAAT CTAAT TAAA GATTG  
TTGCC ATTC TTGGATTATATTCAGAGGTACAGC GAATTC TTCTCTTCTGATGTAGTCAGAAT AATCATA  
AA ATCATTAGAGATATTGCC TACC GGACTGTAATAGTGCACAAGGAGCC TTTATTTA ATGGT GGATAGT  
ACGCAGACAGGTCA GGAT GGGCAGTCCACCACGAGC GAGT GATATTAAGGATATCC ATGGCACGCTCATC  
AATCAT TAAA CATTCCGTAATTG GGATTCCTTT TTTAGGT CAAA ATGGAGAAAATAAA ACC TAAA GTTT TT  
TC TCCATCAACCG CAAA G TAAA AAGAAA ATTC CAT TTTATTTCTTCCGCGAAGAAGAGGAGAACAAG GAA  
TTACAGGGAGAATAT CAAAGGATGGGATAAGAGGTGCAAATAAA TTATGGAGCGCAAGCTCT CAAA TTTT  
TAAA GAGGATGCATATTC CACAAA AGGAGATGAACAGCCTCCACAGACGCCAAAATG TTTA CAGTTACGA  
TAACAGGAGAGCAACTT GAATCC TAAAGAAA GTGAAA AGGTT TTTCTCCTCAAAGGAGGTGTGAGGTGTGAC  
TTTTACAAA CAAGGACTTGCC CAAA CGAGAACG GAAA GGATAACAAAAAAGAGAAG GGAT CAATGAGA  
AGGG GAAA GAGGGCCCTGTTGATAAA AGTGCCCTCTATAAAAAAGA GAAAGCGCTAAA ATATTATTTT CA  
AATTGAGC GAGT TTT TTTCTGCTGT TTTAACT CAAA TTTTAGGGGCGGCTTTT CAAA TTGG CAAA ACC CAA  
ACT TTTA GTAGCACAAGTTCCTT CAAA TACAAGCTTT TTTAGCTACTGTT CAAA TAGCGCGAACAGGCTTCT  
TAGCAGCAGCTTTA GCTTT TTTAGCAGCGGC CAAA CTTTTTTTTC ATTAAGCCCATTT TTTCTGCT TTTAAT  
GGACTC TTTACGATATACCTTCGCGTCT TTTCTAA CAAA ATAGATTC TGTACGAACTC CAAA TGCTGCG  
GCT TTTATTTCTTT TTTCTGCTTTAAGCAAAT CAAA TTGGATAC TTTCAACAAGTCAGTCATTTTT CAAA  
CCGTATCT TTTAGCGCCAT GAAA AAAT ATCC TCTAGTTGTTGT TTTAAA CTATTTT TTTCTAGT TTTAATT  
TTTAATTAG CAAACAAA TTCAAATTC ATGCAACCAT TTTCTAGAAT CTAGGTAA GGATCC TAAAGCAGCT  
TTACAAA ACATCTCCTTGTACCCTCTG TTTA TCAATAGGTTATT TTTCTCTGTTAATAGAAA AATTTT  
TTATAAA ACTATGTGCTGCATA GGGT CTGAATA GGG TTTCT TTTA ATAGAAA GCGCTGAACCTTG TTTAG  
AAA A GAAAGAAA GGAGCTTGTCTCTTGTTAGAAGATTC TTT CATAGATCT TTTCA GAATGGAT TATTAAG  
ATGCCCTCATGATGAGAAGTC CAAA CAGTCTTC CAAA AAGAG GAA TAAA CAAGTGTTT TTTCA TAT GAAT  
ATTTA TAG ATTC ATCTCTGGAAGCTGTT CATGG TTTCTGATAGGTTGGG GGAT ATGCTTCGGAGCTGACG  
TGCCAC TTTCT CAAA GGCACCAATGCGCAGACGTT CGCAAGGCGATGCAAGAGGGCAAGCCGCT CAAA CC  
TATT CAAA ATGCG TTTA TTTCTGTCGTATCGT GAAT GACAGCTCATC TTTATCTGA GAAA GATTGG GAAA CA  
GCAACATGGTTAA CAAAT GAAT ATATACGAGG GAG TTTAAA GCGGGGAGAACAA GAGT TATGCTCGGAGC  
TTG TAAA ACCTCTGT TTTCTTTA GCTGTAATGCCTCCGAGT CAAA AGCTCGTATTAAGCAAGTGTGGCA  
GGT ACTC AATCC TCAAGGAGCTTC TTTAAA GGACTTAGTCCG TTTACTG GAAA GTAGC GGAT GCTCCTCT  
TCACCGCAAGATCATCTCCTAC TTTCTTTA TATAATATGACACTGCATAGCAGTTATGAGAACAA GAAA G  
CAGAG ATCC TT CAAA CAAGAGAACAAAAAATTATCAGGACGC TTTACG TTTA TGCGAG GAGT TGCAAGA  
AA ATCTGACTTCAGGGC CAAA TTCACCTC TTTCAACGGTATATGAGGTGGAGCAAGCCTTCT TAAA GC GA  
ATCTCCTTAGCCATACGGTGGGAACAAGAGAAGGAGCTGCAAGGGAGCCCTCTATA GAGTTGCTATTGG  
CCTATTGTAGTGCGGAAGA GAGT TACGCAGAGGCTGTGGAGCAGTTAATCAAAAAAATA GAAT TAGGAAG  
CTTAGACCGATCAAGAAGTCGACGCAAT TTTACAAA CACATGCGTTAAG TAAA CTTCATGGGAAGAG  
ACTC TTGGAGAACACGAACTGGAGGTTCTCATATCAGGAGGACACTATCTCACATCGA TTTA TTTCTCAAC  
ATGCTTACT TTTCTGCTTCTCGAACAATAT TTTAAA AAATCTCAAATACA GAAA TATCTCGCTTATTAGA  
TCAAAG GAAA ACCGTC CAAATTGAG ACCCATAA GAAA TATCCA GAAT ACCTCTTC TTTCTAGGCAAGTAC

TGGT TTTACTTGC GGA TTTCTCTCGTGCAGAAGAGGCTT TTTCTTCTGTAATTCGGTATGCAGATCGAC  
TGGGAGTGTCTTTA GCGGAAACTTATGAGTATTTAGGGTGT TTTAGCTTGTACAAAGGGCACTATGCTTC  
CGCTAAA GAATTC TTTCTAAA GCTTACAAGGGTGGGGAGAGAGGATGCCGGTATA GGATTTGTATCTA  
TTGGCAGTCTTAGAAA AAGATCC TAT TTTATGTCAGCAGGT CAGAGAACAGGTGTC TTTATCC TTTTCAC  
ATCAG GAAT TTTAAA ATGGATGGATAGAAATTTCTTACCTGAGCCAGG GAAA GAAGGCTCTTCTTTT TT  
TAAGGTATTGGGAAGCTCGCGTTC TTTATCTGAAGAA GAGT TTTATGGAT TACTGC TAAAGGAGATGATT  
AGTCGTCATCATAGAGAGAAGCTCTCTTGCTCTCTTATAACAACGGCTAGTGTACGACCAGTT GGATCGAG  
AGATACAACTTCGGTTGACAGAAA CATTAAATTC AAACAGAAGATCTTCTGGTGAGACGCAAGCTCTCT TTT  
ATGGAGAGCTCTATATGAA GGATCG CAAA TATCTTGGGGTCTGCTCATCAGAAT CAGACTTTACAAAAG  
AAAAGTAT CAAA CAGTGTT TTTCTGCTCTGTGCGCAGCAGGACCC TAGCGCAATACAGCAAATAGCAGAAG  
CTT TTTCTTCAGGAGCCTC TTTATGGCAATCC TC CAAA AGGATGGTGTGGGCAGTTAGTCATACTAGT GA  
AAATCC TATATCGAAGGCATATTC GTTAGGCATATCTGATCGGCC TGGGGAGATCGACTGTATCT TTTA  
CAGTATTCATTAGAGCAATATC TTTCTGGAGATACAGAATTATTAGAGTATTTAACACAATTC CCAGAAT  
TATTC CCGAACTC GCC CAAATTTGCC CAAAGTTTA TTA CAAA CAGGCAAGAGGTGAGGGAGATCC AATTCG  
AAA GATCGCTTGGTTAACAAAAGC TTTAGAGACT TTTACGGAAAATTC CAAA TTAGCAAAGGAGAT GAAA  
GCTTGGGCTCC CAAA TATTATTTAATGCGAATGGAT TTTAGCAGAAA CCTACCTATA TTTAGGGGAATGTGT  
CTAAA TCACAAACTCT TTTCTGAAGCGATCCAAGAA GAGTGGGGATGCTCCGCACC ATCC TTTATG TAAA GTT  
GATAG ATCCGCCGCAC ATCCGTGTGTC CAAA GAGATGCGT TGGG TTTCTGGGGCTTGCTCATGTGTATGAA  
GCTATAACAAGCAACTGAACAAA GAAA TGCGTTATTAATCAGCCACATT GAAA AACG TTTCTTTTCAAACGC  
GACCAAGACAG GAATATATTGGGAAGATGTTAAC ATTCACGAGT TCTCTATGCAGAGA ACTATTAGCAGA  
TGCCTCATGGTAG TAAA GAAGCTATAGC TTTA TAAGCAGACGCTGTAGCGCGGTGAGACCTGGACCTGC  
AAAATTC TGCCCTACAATT TTTA TATTGTGAGGAAG TTTAGATAGAAGGCGTTGGCGGGAT TGGATAAAT  
CCAACATGGTGTGGGAAGTCCCTCTCGAGGAGA GAATAGTGA GAAA GCTTGGGGAGGAGTG TAAACAA  
ACAGGT ACTCAGAAA TAGCTGCTAGTGA GAAA GCATACGCTTCTTCTTGGTGCCATCGACCTTC TAAAAG  
AAGAGAGACTATTGTATTAGCCGCTCGGGTTGAGGGAACACTTCCGTAT TAAA CACGATCCCTAATAAG  
GGAGGCGTATCAGC GAAA AGCATGCCAT ATCCATGAGGGATAGGGAGGGATGCATGCC ATCC TAAA GATA  
CACAAGAGAGATCC CAAGATGAAGTCG CAAA CTTGATAAGCTTGG TTTACAGGGATCTCTTCTAGACAGGA  
AGGGAGATCGTGCACGG ACCCAGCA TAAATGAGCATATCTCCGTTA TTTCTCCTTGAGGAGAT GAAAGA  
GAAAT TTTCTCCGTTCCCAACTGAC GGAT CAAA CTGAC GGGTGCAGAAA AATACCAGGTAGCAGGCAATT  
TATCATGCAAAGCCT GGGTTAGC ATCCATCC CAGACC GCAAGGTAGC TAAA TAAGGGCCTGTGCG TTT  
CTCT TTTAG GAAA ATC CAAA AGATAACTACGTAACAACG ATCC TG CAAA AGCTTCTCTTCGCGTTAATTCT  
GGGT AAGCCATCTGTGCAGACAATATAGCTATGCTCTGCAC GAATAGCAATGCTAATGGGAT TTTAAA  
GAT TTTCTTCTAAGCTTGGAGAAGCTGTGTCT TTTAAA GAAGGCTTCCACGGAGCTGTCTTG CAAA TAAGG  
ACCGCAAAGAAA TCC TTAGCAAAGAGAGAGGGAGAT CAAACAAAAA ATAGTCCAAGGCGAGACT TTT  
CGGGT TTTATTATTATAGT GGATAAAA GCGGTT TTTA GCCTCTGGAGAGCTATATAATAGCTCGTCTGCTA  
GGCC TAAA GACT GAAT GAGGTGAA GGGTGTGTTGCCATCATGAGC TAAAACAAAACC TTTAGGGCCCAT  
ATTGAGG GAAAACCC TTGTTG TTTCTCTGTGACAATTAGCCCTCCAGATCGAG ACTC TTTTCTAGAATA  
GACAAC TGCACATGAGG GAATCG CAAA TGTAGCCACCACGCGGCA GAAA GGCCGGCAATACCTGAGCCAA  
CAATGAGAGCATG TTTCATATAGACTTC GAAAAAAGAGGTT TTTCTACGATGTCTTCAAAAAATAATGG  
TCAAAGGCTGTGGCAATG ACCCGTACAAAAGCTCTCCAAGAG GAGT TACTTG TAAA GAAGAG GAGTCTT  
GCC GAATTAATCC TGC ACTCTCC ATCC CGCACAGCCGATCATAGCTATCTGCAAAGTATCGATCAAAGCG  
TTCAT GAAA CCGTTGTTGCAACTC CAG TTTAGACAAT GAAA AAGAACACATTA GGGTAT GAAT CACCCAC  
AAA CGGAT TTTA TCATCC TGAGAAA GAATCTTGCC TTTACAGTTGCTAG CAAA CTAGCCTGAATAGTCT  
CAGAATATTCACGAAGATCC TTAACAT CAAATAAA TAGATCC CCGAAT GAAA CTGGTTGCCGATATAACC  
AAAACCTAGAAGATCTTCTTCAGGAGGAAGAGAGTACCCTTG GAAA TTACGAAT CAACGT CAAA TTCTTA  
AGGGCGATAGTTAGAG GGATCATCC GGAAGAGAAA AATGATCTAGACCAATAGCCTGGTAGCCTTCTT GGA  
TCAGGGTATGCCGAGATTGGGAA TAAA TC GCGAAT TTTCTCTTCCATGGAAGGGAGATC TTTA GTGCGCAA  
AGCCT CAAA ATGCGGCTTAGCCCAAGGTACATGAGCGAAGGAGAAA AGGGCTAGGCGGTCTGGCCGCATA  
TCTAAGATATGTTCAATGG CAAATTTAAA ACTAGACTGTG CAAATTTA GGGAGACCA TAAA TGAGGTCAA  
TATTAATACCTGT GAAT TTTA AGTCTCG GAATAGTTGATAAGCTAAGAGCGATTC TTCGTAAGATTTGGCG  
TCTACGAACAGCTTCTTGAACTTCCATTGGGTATCC GAATACCC AGACTCACACGAT TAAA ACCTAGG  
TTATGAAG GAATAGAGG TTTATCGGC ATCCCTCTCTGAGACTTCGAG GGATCGAACTC TATGGCAAAGTTCTT  
CGATATT GGA TAAA TCAAAAAACGAT GGATAT GAGT GAACAAAACGTTCAAATTGAGCACGCGA TAAA CG



ACTAGGAGTCCCGCCACCAAAGTGAATTC TAGAGACTGGTTTC TTCCCTCCTAATAACGAGAAA GCTAGG  
CGCA TTTC TTGGAT TAACGTCTCTATGTAGTGATCTACGATTTCTGCT TTTC TA TTAAAACAACAGTAC  
ATCCGCAATATAGACACATAGATTGGCAGAATGGATGTGGAAGTA TAAAGAAA GAGGATCTTGCTCCTG  
AGCAAGCCTCTCCAAGCCGTATAGCCATAATCTGAGGAGGATTC CCAGTCGACGATGGTG GGGTAGCTC  
GTATAGCGAGGAGCTGGTTGATGCAGCCCTTTTA GGAAGTTGAAA TTGATGT TAAACATGATAACAACAGC  
CTGTACAT TTTC TATTGGCG CAAA AGGTAAGATACCATGCCCTAAA TT GAAAATATAATGCGATTGCTGT  
TTTAAGGGAGCAAGATAAGCTTCAAGGTGAGCAATCAGTGCGTCTTGGGGAAGTAG TAAAAGAGCAGGAT  
CGAAATTTCTTTGGATAGATCCGGGACTATGTATCTGACGG TAAA CCTCTGGGAGCTCTACGTGATAATC  
GGGATGTAAGGTATCTGCTCCAATCGCATATAGAGACAAAAATTC TTGG TAAAAGCATCGGCAGAACAGA  
CTAATAGGAGGATTC CCTGTCTGCTTGA CAAAACGGAT TAGCTTGGTATTGGGAGCAACTACGTAT CAAA  
CAAAGAGGTGAGGAGGCAGTCG TAAACTCGAAGATTC AAACAATT GAATCGCTGCAGCTCCAGCTTGACAC  
CTGCATCTGGAGATAAGTAGCGGTCCCTA GAGTGA TTTCATCCAA TAAAGC TTTAATCTGTGCGGATAT  
TGATAGAGGAATGCAATTGT TTTA GGGTAGTCTCTAGATGCTCCCCCTCTATTAGATAACTGGCGAGAG  
TAAAAGGAGAAGCGGCAAAGGCAATCAAAGGGACCGTGAGACG TTTC GTTAGTTGCTGGATAGCTTCCAG  
TAGAAA TGAGAATG TTTC TTGAGGATCT CAAATGAAA ATAAGAGGTTTCATGAGGG GAATAGCTAACCTCT  
GGCCAGGAGCAAATCGATAATCGACA GAAAACCC TTCTAGAATAGAGA GAATATCAGCAAAGACAATAG  
CGGCATCTACTCCTAA TAAAGAAGGCCCTAATAGCGTTCGCTTCTACAATAGACTCAGTATCCAAAAA  
ATC TTTC AAAGAACGG TTTC TTTC AGCTCTTGATATTGAGGTATATATCGCCCCACTTGGCGGAGGAAC  
CATATTGGCGGACGTTGTTGATCTCGAGGGGAGATGG TTTC ATAAA ACCCGGTCATAGGCATCC TCTACC  
TCTATTA CAAAAGG GAAA GCCTTTTC TACAGACTC TTGGACTTCT TTTAC TAAAAGTTCCGGTGTGCGTGA  
TAAA GAATACGGTAACGTTT CAAAA CAAACAAATC TTTA TCATGATACTGCT GGATATATAATGCATTC  
CCTGTTCC CAAAATACTG GAAA GGTGATATTC CTGCGCATTAACC GAATCCGTGCTAGAGCAAATAACC  
AGGAAA TAGCTTCTGGAGAAGGTCCAACCTATCC CGCAGCTCTTCTTCTATAGCCTCTAGCTCCTCTTC  
AGATTCGGCGTTTC CAATTT CAAAATAGAACTC GATGCGCATAGAAGCAAGATCTATATAGTCTTCAGGG  
ATGCGCGCATGATAAG GAAACTCAATTT TTTA TATCATCGTGGAAGAGCATGGGT TCAAATTTA TGCTTCA  
GGGCAGCCACAGCTTT TTTCAGTAA CAAACAATATAGGT TAAACCC AACAGCACTAATATGCCCGGATTG  
GTCGGTACCTAAAATA TTTC CAGCTCCGCGGATTTTC CAAATCATGAAGAGCTAT TTTCATCCCGCCACCG  
TACTCCTG TTTATTC AATGCTTCTAGGCG TTTA GAAGTAGGTCCGGATAAGCGATC TAAATGAGGGACAA  
GAAAATAACAATAAGC TTTC TTATTC CATCGTCCAACACGGCC TTTC CAAAATACAAATCAGCCATAACC  
GAATTTA TCTGCGTGGTCTATCAAGATCGTACAAA CATTAGGAATGTCGATAACCAT TTTC AAT TAAA GCC  
GTTGCGACAAGCACATTGG CAAA TT GAGT TTTAAATTTATAAAA ATATACTTGTAGTTCATCGGCATGCA  
TCTGTCCATGAGCTACGCCAATACGCGCTTCCG GAATCAATGTTTC GAATGG TTTC TCC TAAA CG GAAAAT  
ACT TTTC GATGCGATTGT GAATAACG TAAA CCTGCCCTCCACG TAAA AGCTCATGGCGTATTGCTGCAGAT  
AGGG TTTC TTCA GAATGCTCCATGACAAATGTACTGACGGGAAGTCGATC TAAA GGAGGCATTGTAATGA  
GAGAAA GGTCTCGAGCTCCAGAT TAAA GAGAGATACA GAGT TCTTG GAATTGGAGT TGCAGAAA CAGTAAG  
ACAATCGATTGTGGGGAAGCGTTC TTTA GAGAATC CAAAGCCTTCACTC CAAAGCGTGTGTTCTTCATCA  
ATAATAAGTAGGCCT GGATTAT GAAA TTCTATGGC CAAATTAATGAC TTTAT GAGTG CCAATGAGAATGT  
CAATACGTCCTTGGGCTAT ATCC TCTAATGTTTT TTTCATCGT TTTC CCTTGA GAAA AGCGGGACAATAG  
TCCAATGTGATGGGCAGCCAGCC ATCCGTTGG GAAAAG TTTC AAAATGCTGGTTCGCTAAGATCGTA  
GTAGGGACCATAACGATTACTTGTGTTGTCATCACACACAGCT TTTACGGCTGCCCGCATAATGATTT  
CTGT TTTC CCGA ACCC TGCATCTCCACAAATCAGCCG ATCC ATTA TTTATCAGACATCATATCTGCATA  
AATCTGATCGATAGC TTTAAGCTGATCTGGCG TTTC TTCATACGG GAAACTTTTC GGCAAACAAA ATTACC  
TCTTCTCCGTGCGGGG GATAGAT TAAA GAATTC GCTGTAGAACGCTGAGCTTCCA CAAA AATCAGCTTTT  
CTGCATACAAAATCACA GAAT TTTC TGAGAGCTCCCGAGATCGTCGCCAC CAAA CTCC ATTC AAGTGATG  
CAAATCAGGAGCTT TTTC TGAAGCACCAACATAGCGTGAGATTAGATAAGCTTGGTCTGAAGGGACATAG  
AGGCGAGC CAAA TCTGCAT ACTC TAAA ACTAGATAATCTG TTTC AATATTGAGATGATTAGGCTT TTTC T  
CTATACCAATGAAT TTTC CAATTC CATTGTG TAAA TGGA CTACAGTCTCTCCTGGGACTGGAATATACAC  
TTCTTCCGTTGTAGTA GAAAAATAGTTCCGTTGTT CAAATCTACGGAGGAC CAAA CTGCTGCAAAATTC  
GAAA GG GAAA ACTGCAGCAAATCC AGCTTCTACTAACGCAAAACTGGAGGAGAGAGTGTAGGATGGTCGT  
AAACAAA AGTG CAAA GGATACAGGCTGCTGCGAGATCATGAGCTTCT TTTAAGGAT CAAATATTGGAACA  
ATACAAAGC TAAA GAGAGCGTACGCCAGCACAAAA ATCC TGGAAAGGTC TTTAAA AATGCAAG TAAA GGG  
TCAA CTGCCACTAG TTTC TATTAGTGCCGGA GGATAGATAAAA AGG TAAAGAAA CTC CAAA TACAGAGA  
TCTTCTTAT GAAA AGCCTCTATA GAAA ATCC TGTATCC TTATGC GAAA TGAGATTGGGGAACGTTT TTTC

TTCAAAAATAGAGGAGTAAATTC CAAAAGAATCCGCTGACATAGATCCTGAATGGGCATAAAAACGTTTC  
GGAAGAGATGCTAAGATGCCTGCAATATCCGAAA AATTATCTTCAAGAGACGAGAGCCCATCAAAGATAC  
AAAGCGGGAACGC TTTAAAATAATCCAAAAGTGAAT AAGATAA CAAA TCTGTAGGAATGATTGCCGTCGC  
AGGAGAAA TGGTAA CAAAAGACAGC TTTCTGTAGAGAGTTGATCCGAAGGGTGTAAAGAGC GAATAGAG  
GAAA CGCGATCC CCCCAGAATTC AATGC GAAAAGGTTCTGGAGAAGATAGGGG GAAA ATATCAACAATCC  
CTCCTCG GAATGCAAAGTCTCCTT TTTCCCTAGCTAGAGCTTCATGTCGATAACC TAAACT TTTA CAAAG  
ATC GAGTAGGGTATCG GGATCCAGTTCTTCTCTACTC GAAGTTCGAGATGATCTC GGATCATAGATTCT  
GGAGAAGGAGTTC TTTCTAATAAAA GCCTTCAGTGTGTGACACAGATAACTGGAGC ACTCTGTT CAAA CA  
GAGAATACAGAATATGGTCTCTT TTTCCACCGCATCAACATTC ACCAGCTTGGGGGA TAAA TCTATTTTC  
TGAAGCAGGGAACTC AAGAGGCGATTCTGCCAATA GAGTGGTCAAATCTTC GAAT TAAA TCATCAAGT CAA  
ACCGGTGTGTAATAACGACGATAGAGC TTTAAGTTC CAAAATAGT CAAA CTATGACAAAAGACCTTG  
CTCCCGAGTGGAGAT TTTCCACTAAGGACGGGAGCTTCGTGTCT TTTAATAAAGGAAA ACTAGAAA AATC  
TATGCTAGTTGGGT C GAAATCCATTGTCT TAAA GT CAAA TTAAGAAA CTCTACAAA AGGTAGCTCCGCGG  
AACTACCTTGTGCC GAAA TCGCT TTTCCGCCACAACGCCACCATATGGAGCAAGAAGCTCTGCAAGTAA  
GGTGTGTGCCTGAACGCCTCGT CAAAT TAAA TCATCGGAGACTC TAGACAAGACAATGTAGCGACC ATTC  
T TTTCTGTGATCCA TAAAGAAA TGAAT TGGTAG GGATTTTC CTTATGTATAGCA CAAA CGTAGTGT T GAA  
TTCCAAA TCCTTCTCCTCAGT TAAA TAG TAAA CTAAGTACGAAGTATCACAGAT TTTCTCACAGGAAGT  
TAACAGGGT TTTTA CTTGTTGCTGAACAAGCTGAT TTTCCAAATCAGCAACTTG CAAA GC TAAA TCC TTT  
T TTTCTTCCATTACACTGC GGAT CAAA ACAAGGAC CAAA ATC TTTA GGAGATT GGATAACGGTAGCTATCT  
CATTTAAA TCCACATCTTGTCCACGAGCAATATTC TCGGCGTCTTCTCCTGTTGTTGCTTCTATACGACG  
GATTCCTGTTGCAACAGCATGTT CAAA GTAATTC T GAAA TAGCCAATATCTCCAGTTGCCTGAGCATGC  
GTTCCCTCCACATAGTTCGTGG GAAAATCC TGCCAAAACAACACGAACAATATCTCCGTA TTTATCCCGC  
AAAAC TG CAAAATTTCTGAAGAGCTCATTACGTCA GAATACAAAAC TTTCTC GAATCGTTACCGGATCAT  
TTCTCTAATTTTCTCATTACAGAGG TTTCTATTGCTAGAAGATCC TCTGGTGATAGCGC CAAA TTATGA  
GTAAA GTCTAAA CGAATTT CAAA AGAGTCGACATAAGAACCTGCCTGAC GGATATGTTCTCCAAGAGTCA  
TTTCAAGAGC CAAA TGTAGAAGATGGC ATCC TGTGTGATTATTAGCGTTTT TTTTCGAAGGT CAAAGTT  
TACCTGTGCGGTGACAGCCATTGCTGTTGTCAAAC TTTCTTGA GAAA G TTTTCCTTAGATGAACGATGAGT  
CCTGC TTTAGGGGCAATAGTATGAGATACCAG GAAA GTTCTGATTCACAGAAA TTTCTCCAGAGTCTC  
CTACAAA GCCACCTT TTTCCGCG TAAA ACGGGGTGGTTCGTAAA ATAATTGCTCCTTCATCTCCTTCTTC  
CAGTGATGAAGCAA TTTCTGTTACTTAATAATTC CTTCAATAAAA GGTGTGCGCAG GAAA GAGTATCGTAT  
CCGATAAAA CTCGGAAGTGTAGTT GGATCTAAA TCTTGAACACAGAAT CACTGTCATTCTTAGTTTT TT  
TCGTGTTTT TTTTCGAGAGCGTTC TTTAGCTTCTACTTCAAGCTTCTCAAAGGTATCC ATATCTATTCGCTA  
GTTATAATCC CAAA CTAGTAGGGCAA TTTCTCATGATAGGAAGCCCGTAAGTATC CAAAAG CAAA AAGGCA  
TCTTCTCCAGAAA TCTTAGCGGAAGAAGCTGAAGA TTTTCAGTACTTGTGGAGTAGATTCCACCTCTCT  
GCAACGT CAAAAA GAAA TGCTCTTCTTGTGGTCAAGACTTCTT GGACAAA TGTGACTGATGCAGAGAG  
TTCAGGATATGCTTCTCCATTAC ATCCACTAGTGAAGGAACCACATCGGCCA GAAA AGGGCGATTGAAT  
CC TAAGCGT TTTTCGTAATTGACAGCTCGGCGGA GAAT TTTCT TAAA ACATAGCCTCGTT CAGTATTCC  
CTGGTAACAGCCCATCAGCTATTGC GAAAGAAA GAGAAC GGATATGGTCCGCGATC ACTCGGAAGGCGGC  
TCCT CAAA CTTCTGTTGGAGAGTATGTTGTCCC GGATAAAT TTTCTAT CAAAAGAAA TGAGATGCTTAAAG  
ACGTCTGCTTC GAATACGGTT CAAA TTT CAGCTAATAGAGAAA C TAAA CGTTCTAAGCCGGCACCTGTAT  
CAACACACTTCTTCTGCAAAGC TAAA AGAGT CCGTCCAGAAGTCTAT TAAA CTC CAT GAATACGAGGTT  
CCAATACTCTAAGAAGCGTCTCCATCAACGTCTTCAAGAGGAGAAGCGGC TTTCCAAATT TTTCTCCT  
CGATC GAATAAAA AGCTCGGAACA GAATCCGCAAGGTCGGTATCC GCCATACTCAGAAA TTATC CAAAT  
CTGT TAAA C GAAA AATTC TGTCTGTGCGGAAGATAT TTTCCCAAAGAGC GAAA GCTTCATC ATCC TTTTC  
ATGCACGGTGGCA TAAATAAAATCAG GGAT CAAAAT T GAAAACAGAAA GCGGAGACTTCCAAGCAAAG GAA  
ATAGCGTCTTG CAAA AAGTAATCACCGAAG GAAA AATTC CCTAACA TTTCAAAAAGGTAAGATGTCGGG  
AGGTGTGTCCAACAT TTTCTAAA TCATTATGTT TTTCCCCGCGCAC GAATGCATT CAAA AGATGTCGTTGC  
CCTTGTGTA ACTCGTCTGCTC TTTCCCTAG GAAA ATATT CAAA AACTGGTTCA TTTCCCGCATTCG TAAAG  
AGTATGGAAGGAT CATTATGCGG GAAA ACAGGAGAAGATGCTACAGGTGTATGGTTCCGGTTAGCATAGA  
ATTTTAGAAAATT GGATCGAAGAGT GTT ACTCAACATGGGGAGACCATTT TTTA ACTCACAACAATACAA  
AAAGA CAAA TCCAAAAGACC GAGTCCACTAG TTTA AGGGAACAAAAG CAAA GTAGGGACTT CAAA AAGAGAA  
GAGGCCCTCGGCTTCAAGAAG GAATATACTAGT GGAT ACTCATAATTAGAACAAGCCAAGATGTAAGCT  
TGTTCCGAGCGC TAAA AAAAA GAAT TTTCCGACAAAAAATCGAAGAGAGGAAGGGTAGGATGAGCAAAAA

AAGAAA AAAAGAGAG GAAAAT CAAA TTTTATAAAA AAGGGTTGAGGATAGTGTGTGAGGGGATAAA TTGAG  
AGGTAA GAAAAA GGGTTT CAAA GG GAGTTGATAAA AAATAGGTGCA TAAAAAATAGGGGGTAGCATAAG  
ATGTAGC TTTCTTTC GAACGAAGGTTGAAGGAAGGCCTCTTACGTGGATGAGAGGGCGCGACA GAGT GGA  
AGGCTGAGAGGCTGGAAGCT TTTT TTAACAATGCAAATGAGATA GAATGCAGGCCAGTATAGATGCTTGT  
GAGGAT TTTCTTAAGAGATTAAGGA ACCCGTTAA TAAA TCAAAGTATATATT TTTT TGAGAA CAAA ATCTT  
GGTTCAGATTGAACGCTGGCGGCGTGGATGAGGCATGCAAGTCGAACGGAGCAATTG TTTT GGCAATTGT  
TTAGTGGCGGAA GGGT TAGTAATGCATAGATAA CAAA TCCTTAACTTGG GAATAACGGTTG GAAA CGGCC  
GCTAATACC GAATGTGGCGATA CAAA GGC ATCCGAGT AACGT TAAA GAAGGGGAT CTTAGGACC TTTT GG  
TTAAGGGA GAGTCTATGTGATATCAGCTAGTTGGTG GGGTAAA GGCCTACCAAGGCTATGACGCTTAGGC  
GGAT TGAGAGATTGGCCGCCAACACTGGGACTGAGACACTGCCAG ACTC CTACGGGAGGCTGCAGTCGA  
GAAT CTTTTC GCAATGGACGGAAGTCTGACGAAGCGACGCCGCGTGTGTGATGAAGGCTCTAGGGT TG TAA  
AGCAC TTTTTC GCTTGG GAATAAGAGAAGGCGGTTAAT ACCCGCT GGA CAAAAGCGTACCAGG TAAA GAAGC  
ACCGGCTAACTC CGTGCCAGCAGCTGCGGTAATACGGA GGGT GCTAGCGTTAATC GGATTTA TTGGGCGT  
AAA GGGCGTGTAGGCG GAAA GGGTAAGTTAGTTGTCAAAGATCGGGGCTCAACCC GAGTCGGCATCTAAT  
ACTATT TTTT TAGA GGGT TAGATGGA GAAA AGGGAA TTTT CACTGTAGCGGT GAAA TGCGTAGATATGTGG  
AAGAACCAGTGGCGAAGGCGCT TTTT TAA TTTA TACCTGACGCTAAGGCGC GAAA GCAAGGGGAGCAA  
ACAGGAT TAGAT ACCCTGGTAGTCC TTGCCG TAAA CGATGCATACTTGATGT GGATGGTCTCAACCC CAT  
CCGTGTCCGAGCTAACGCGTTAAGTATGCCGCTGAG GAGTAC ACTC GCAAGGGT GAAACTC AAAAGAAT  
TGACGGGGGGCCGCACAAGCAGTGGAGCATGTGG TTTAATTC GATGCAACGCGAAGGACCTTACCTGGGC  
AAA ACATGTATATGACCGCGCA GAAA TGTCGT TTTT CGCAAGGACATATACACAGGTGCTGCATGGCTG  
TCGTCAGCTCGTGCCGTGAGGTGTT GGGT TAAAGTCCCGCAACGAGCGCA ACCC TTATCGTTAGTTGCCAG  
CACTTA GGGT GGGAACTC TAACGAGACTGCCT GGGT TAACCAGGAGGAAGGCGAG GGATGACGTCAGTCA  
GCATGGCCCTTATGCCAGGGCGACACACGTGCTACAATGGCCAGTACAGAAGGTAGCAAGATCGTGAGA  
TGGAGCAA ATCC TCAAAGCTGGCCCCAGTTC GGAT TGTAGTCTGCA ACTC GACTACATGAAGTCG GAATT  
GCTAGTAATGGCGTGTAGCCATAACGCCGTGAATACGTTCCCGGCCCTTGTACACACCGCCGTCACAT  
CATGG GAGTTGGT TTTA CCTTAAGTCGTTGACTC AACCCGCAAGGAGAGAGGCGCCCAAGGTGAGGCTG  
ATGACTAGGATGAAGTCGTAACAAGGTAGCCCTACCGGAAGGTGGGGCT GGAT CACCTCCT TTTA AGGAT  
AAGGAAGAAGCCTGAGAAGG TTTT TGACTAGGTTGGCAAGCAT TTTA TATGTAAGAGCAAGC ATTC TATT  
TCACAAA TGTGTAA GAGTAGCGTGGT GAGGACGAGACATATAG CAAATGATCAAGTATGTTATTG TAA  
AGAAA TAATCATGGTAACAAGTATA TTTT CACGATAATAATAGACG TTTAAGAGTA CAAATCT TTTA GGT  
GAAGTGTTCAT GGATCTATAGAAA TTACAGACCAAGTTAATAAGAGCTATTGGT GGATGCCTTGGCAT  
TGACAGGCGAAGAAGGACGCGAATACCTGC GAAA AGCTCCGGCGAGCTGGTGATAAGCAAAG ACCCGGAG  
GTATCCGAATGGG GAAA CCCGGTAGT AATAGACTACCATTGCATGCT GAATACATAGGTATGCAAAGC  
GACACCTGCCGAACT GAAA CATCTTAGTAAGCAGAG GAAA GAAA TCGAAGAGATTC CCTGTGTAGCGGC  
GAGC GAAA GGG GAATAGCC TAAA CCGAGCTGATAAGGCTCG GGGT TGTAGGAT TGAGGATAAA GGATCAG  
ACTC CTAGTTGAACACATCTG GAAA GAT GGATGATACAGGGT GATAGTCCCGTAGAC GAAA GGAGAGAA  
AGACCGACCTCAACACCT GAGTAGGACTAGACACGT GAAA CCTAGTCT GAATCTGGGAGACC ACTC TCC  
AAGGC TAAA TACTAGTCAATGACCGATAGTGAACCAGTACTGTGAAG GAAA GGC GAAA AGAACCC TTGTT  
AAGG GAGT GAAA TAGAACCT GAAA CCAGTAGCTTACAAGCGGTCCGAGACCAATGGCCCGTAA GGGT CAA  
GGTTGACGGCGTGCCT CAAACATGATGAGCCAGG GAGT TAAGC TAAA CGGCGAGGTTAAGGGATATAC AT  
TC CGGAGCCGGAGC GAAAGCGAGT TTTAAAAGAGCGAAG GAGTCG CAAAG TTTA GACAC GAAA CCAAGTGA  
GCTA TTTA TGACCAGGTTGAAGCAT GGGTAAA ACTATGTGGAGGACCGAACTAGTACCTGTT GAAA AAGG  
CAAA GATGAGT TGT GAATAGGGGT GAAA GGCCAATCAA CTGGAGATATCTTGTCTCTCC GAAA TAAC  
TTTAGGGT TAGCCTCGGATAATGAGCT CAAA GGGT TAGAGCACT GAATTC TAGCGGGGGCCTACCGGCTT  
ACCAACG GAAA TCAA CTCCGAAT ACCAGAAGC GAGT CCGGGAGATAGACAGCGGGGGCTAAGCTTCGTT  
GTCGAGAGGGGAACAGCCAGACC GCGGATTAAGGTCCTAAT TTTA TGCTAAGT GGGT AAGGAAGTGAT  
GATTC GAAGACAGTTG GAATGTTGGCTTAGAGGCAGCAATCA TTTAAA GAGT GCGTAACAGCTCACCAAT  
CGAGAAT CATTGCGCCGATAA TAAA CGGGACTAAGCA TAAA ACCGACATCGC GGGT GTGTGATAAGACA  
CGCGGTAGGAGAGCGTAGT ATTC AGCAGAGAAGGTGTACC GGAAGGAGGGCTGGAGC GGAT ACTAGTGAA  
GATCC ATGGCATAAGTAACGA TAAA GG GAGT GAAA ATCTCCCTCGCCGTAAGCCCAAGG TTTT CA GGGT  
AAGCTCGTCTTCCCT GGGT TAGTCGGCCCTAAGTTGAGGCGTAACTGCGTAGACGATGGAGCAGCAGGT  
TAAA TATTC CTGCACCACC TAAA ACTATAGCGAAG GAATGACG GAGT AAGTTAAGCACGCGGACGATTGG  
AAGAGT CCGTAGAGCGATGAGAACGGTTAGTAGGCAA ATCC GCTAACATAAGATCAGGTGCGGATCAAG

GGAATCTTCGAGGAACCGATGGTGTGGAGCGAGGC TTTCAGAAA TAA TTTC TAGCTGTTGATGGTGAC  
CGTACCAAACCGACACAGGTGGGCGAGAT GAATATTC TAAGGCGCGGAGATAAC TTTCGTTAAGGAAC  
TCGGCAAATTATCC CCGTAACTTCG GAATAAGGGGAGCCT TTTA GGGT GACTATGGAACGATAGGAGCCC  
CGGGGGCCGCAGA GAAATGGCCCAGGCGACTG TTTA GCAAAAACACAGCACTATGCAAACCTCTAAGGG  
GAAGTATATGGTGTGACGCTGCCAATGCCAAAAGGT TAAA GGGAT ATGTCAGCTG TAAA GCGAAGCAT  
TGAACCTAAGCCCTGGT GAATGGCCGCCGTAACATAACGGTGTCTAAGGTAGC GAAA TTCCTTGTC GGGT  
AAGTTCGACCTGCAC GAATGGTGTAAACGATCTGGGCACTGTCTCAAC GAAA GACTC GGT GAAA TTGTAG  
TAGCAGTGAAGATGCTG TTTA CCC GC GAAAGGAC GAAA AGACCC CGTGAACC TTTA CTGTAC CAAA GTAT  
TGGTT CAAA G CAAA TTATGTGTAG GATAGCCAGGAGACTAAGAAC ACTCTTCTTCAGGAGAGTGGGAGTC  
AACGTT GAAATACTGGTCTTAACAAGCTGGGAAT CTAACATT ATTC CAT GAAT CTGGAAGATGGACATTG  
CCAGACGGGCAGT TTTA CTGGGGCGGT ATCC TCC TAAA AAGTAACGGAGGAGCCAAAGCTTA TTTC ATC  
GTGGTTGGCAATCAC GAGTAGAGCG TAAA GGTATAAGATAGGTTGACTGCAAGACCAACAAGTCGAGCAG  
AGAC GAAA GTCGGGCTTAGTG ATCC GCGGGT GAAA GTG GAAT CGCCGTCGCTTAAAC GGAT AAA AGGT AC  
TCGGGGATAACAGGCTGATCGCCACCAAGAGTTCATATCGACGTGGCGG CAAA GCACCTCGATGTCGGC  
TCATCGCATCC TGGGGCTGGAGAAGGTCCCAAGGG CAAA GCTGTTCCGCAAT TAAA GCGGTACGCGAGCT  
GGGT TCAAACGTCGTGAGACAG CAAA GTCTCT ATCC TTCGTGGGCGCAGGATACTTGAGAGGAGCTGTT  
CCTAGTACGAGAGGACCG GAAT GGACGAACCAATGGTGTATCGGTTGT CAAA CCAAGAGCATAGCC GAGT  
AGCTACGTTCC GAAA GGATAAGCATT GAAA GCATC TAAA TGCCAAGCCTCCCTCAAGATAAGGT ATCCCA  
ATGAG ACTC CATGTAGACTACGTGGTTGATAGGTTGGAGGTGTAAGCACAGTAATGTGTTACGTAACCA  
ATACTAATAAGTCCAAAGACTTGGTCTT TTTA TGATTGGAAGAGCC GAAA GGCAAAGACAATAA GAAAA  
GAGTAGAGAGT GCAAGTGCGTAGAAGACAAGCT TTTA AGCGTCTATTAGTATACGTGA GAAA CGATACCA  
GGAT TAGCTTGGTGATAATAGAGAGAGG GAAA CACCTGACACC ATTC CGAACTC AGAAGTTAAGCCTCTG  
ATCGCTGATGGTACTATACACGA GAGTATGGGA GAGTAGGTCGTCGCAAGCAT TTTA TTATATAAGATC  
TTAGTCATAGAC TAAA AAGGAGAAGGGGTAGCCGCTAACGCAGCT ACCCCCT TTTC TTTTC TC TAAAAT  
ACCTTCTCTCTTCTTCTTGTGTA ATCC TAGTCAAATTATCTCTA ATTC TCTACTATCTTCTTCTTATC  
CT GAAA TAGAG TTTA AGA ACTC TAGGGACTTAA TTTA TTTTATTC TCCTTATTATC GAATTTTC GTTCT  
ATATT GGGT TAAGC ATTC GTATAGGTATCAACTTCTGC TAAA G GAAA AAACATGGCTGGCAATAGTGATT  
TA GATATAGACATCTTAGAAAAGATTGCAGGA ACTAT TAAA CAGTTGAGCATAGAAA GT ATTC AGAAA GC  
ATCTTCAGGTC ATCC AGGAATGCC TTTAGGAT GCGCAGAGCTCGCTGCTTAT TTTA TATGGTTACGTATTG  
CGATATAATTC TAAA GATTCTCGATGGGTGAATAG GGAT CGCCAAA TTCTCTCTGCTGGACATGGTTCTG  
CTCTTC TTTACTC GTG CAAA CAT TTTA GCAGGATTC GATGTAAA CCTAGAGGAT CTGCAACAAT TTTC GTCA  
GCTCCAATCTCGAACTCCCGGGC ATCC AGAAT TTTA GAGAAA CTGATGGTGTAGAAGCCACTACAGGACCT  
CTAGGACAAGGAGTAG GAAATGCTGTTGGAATGGCTC TTTTCAT TAAA AATGTTAGGAGCCAGAT TTTA ATC  
AGCCTGC GAATTC TATC CAAA ATGCAAAAGTGTATTGCTTAGCAGGAGATGGGTGCTTCATGGAAGGCGT  
GAGT CATGAAGCTGTAG TTTC GC GGGTTC TTTA GGCTT GGATAATCTCGT CAAA ATTTATGATTATAAT  
GAGATTAT TTTA GACGGG ACTC TTCACGATGTAAGTATTGAGGAT ACAAACAGAGATTC TTAGCATATG  
GCTG GGAT GTG CAAAAA CTGACGGACATGAT CAAA AGAGCTTGCATCAGGT TTTC ACACAGATCAAGAA  
AAGCCAATGCAAACCTACGTTGATTATTGCACATACTATTATTGGACACGGCTCCC TAAA GAAGGAACC  
AA TAAA GCACAT GGGT CTCC TTTA GGAGAGGATGGTGTGCTCAAAC TAAAAG TTTC TGGCATCTCCAG  
AA GAAA AGTT TTTC GTTCCTTCGGCAGTGAAGATGTT CAAA CTGCAAACAACAGGAAGGTAA GAAA TT  
ACAGGAAG AATGGCAAGAACGCTTCC GAGTCTGGTC TAAACAAGCTCCCAGCAACATCAAGAATATCTT  
CGATTGATTC AAGAGATCTCGATTCAAGAACTC GAA GAAAT CAAA AATCTTATTGATATGCCAGAGTCTA  
TAGCCGGGCGTGCAGCTTCC GAA TAAA GTC ATTC AGGTATTAGCAGAGGATATTC CATCCCTCGTAGGGG  
ATCGGC GGATCTCTCTAGTTCAGATGGTACCTGGATAGC TAAA GAAGGA ACTATTAGTGCTAGCGAT TTT  
CTTGGGCGGAATATTC GCTATG GAGT GCGCGAATTC GGAATGGGCACGATTATGAAC GGAT TAGCGTATA  
GTCAAGT ATTC CGTCC TAAA GGGGA ACTTT TTTA GTCT TTTC CGATTA CAAA CGTTCCGCGATTC GATT  
AGCAGCATTATC TAAA TTGCCGGTAA TTTA TCAGTTC ACTCATGATTC GATT CAAA TTGGAGAGGAT GGA  
CCTACACATCAGCCTATAGAGCAAATCATGTGCTGCGGGCT ATTC CAGGGCTAAGAGTGATTC GTCCCTG  
CGGATGC GAATGAAGT GAAAGGAGCATGGTTAGCTGC TTTAGAAA GCGCTGGTCCAACAGC TTTAAT TTT  
ATCTCGACAAAATCTACCT ACTCT TAAA GAGAC GAAA CGTTC TTTC AGAGAAG GAGTAA GAAA GGGT GCT  
TAT ATTC TGGT TAAA GAGGAAGGAGATCGCCAGACTATACGCTGTGTGCTTCT GGATCCGAGGTGCA CA  
AA GCTATAGAGGTTGCACAAAGTCTTATGGC TTTA GATAAGCGTGTGC GAGTGAT TTTC ATTC CCTTGTG  
GGAGCT ATTC GAGAGACAAGACGTT GAGTATCGC GAATCCGTAATAGGAGGAGAT TTTAGGGT TCGGTG TT

TC TATAGAAGCAGGTACCGCCTTGGGTGGTACAAATACATCGGTAGCAATGGCTTAGCCATTGCCATGG  
ATGGGCAAAGAATGTCCGGAGCTCCCAATGAGGTGGCAGAGACTTGCGGTTTC ACTGTGGAT AATATTGT  
GCAGAGAATCCTTTC TGTTAGAAA TCCCGTCA GAAACTC CAGCAA TTCAGAAA GAGAAT CATCGGCT  
TGCCCAA ACTC CATGTGCGGCAAGCCT CAAATTTTC TTGATTC CTGGCCTGATTTTC CAAATAGAGAGG  
CAAACACCTCAACGCCTGTTAGTATATGCTC CAAAGTGTGAGAGTTTAGGACTGCCGAAGTGC TTTC CTT  
AGTPTTAATTC CATCTTTTC GCAAAGGTAGATCC GATATCAGCAAAAGTGCTCC TAAA GGAAGATTC CTT  
CGGTATCC TGCAGCAAATAAGGTGGCAC ACTC CATCTCGACAG CAAAGC TTTA TTTTCATATAGT TTTC  
GACGGA ACTCTTTA T TAAACTC CCAAACC GAAT GTTAGTCGTGTGGGTGATGCC TATATGGTAAGGGAG  
GTTCAAAGCTTCGAGAAT ATTGGTGATCATTT CAAATACGACAAAATTAGCTAATGCAGGGACCTCTGGG  
GGGAAGTATGCATCTGATGTTCCATCTTTTCGGATGCTAGCAACAGGGACAAAATAATCTCCTA CAAAGT  
AGTGGATCTTAAGCCTCCGCACATGCCAACATGATCGCTGCTGTAGCATTGGGAAG GAAA GAACACAG  
ATCTACGGTAAGAGCTGCTCCTGGAGAGCCTAA TTTAAA ATCGATGATTGAGGTGT GAA CAAA AGGCGCA  
TGCGCTGCC GAAA ACATGGATCC TCGA GAAA CAGGGACCTGATAGA TTTC AGC GAAA ACATCC ACGTAAT  
ACCC AAAATTAGTAAGAAGGAGATAGGGCTGAACTC TTGAAT GGTAGAGCCGGTATAGCGCTCTAGCAT  
GTCACAGGCGATTG TTTC TTCGCTGATTTTT TTTA TGTGATGGGT CA TAAA TCACAGATATTATAATGGT  
TAGA GAAT CTTTT TTTC TAAA AACATAGTATGAAGATGGAACAAGTTGTTCTCGTGAGGGT AATAGTTGG  
GCTACT TAAAAGTATAGT TTTC TCAA CAAGAAA GAGG GAAA GCG CAAATTTTC GCGACATTC TTCTGGAC  
AAAGCTTAGAAGAGAACGATAACATGGATGGAGAAA AGATAAC GGGT TAAGCGTGT TATGGTTCTGTGTA  
GCACTAGT GAATTTTC GTGTAGGAT TGCGCGTTGAGATCGATGGACA ACCCTATGTAAT CAAA CAGAACGA  
T CAAA TTAAGCCAGG GAAA AGGACAGGCT TTTAATA GAAT CAAAGTCAAAA ACTT TTTA ACTGGGCGTGTA  
ATAGAAA AAACGTTCAAATCAGGG GAAT CTATAGAAA CTGCCGATGTACGGGAGCAGCAGATGCGTCTTC  
TGTACACAGATCAGGAAGGGCTACG TTTA TGGATGACGAGACCTTCGAACAAGA ACTCATTT CAAA GGA  
CAA ACTC GAAA ATGTTCCGCAATGTTATTAGAAGATACAATATATACGTTGGT CAAA TACAACGGGGAT  
GTGA TTTC TGTTGAACCTCCGATC TTTA TGGAGCTCACTATTGCA GAAA CAGCTCCTG GAGT CCGTGGGG  
AT ACTGCATCAGGAC GAGT ATTGAAGCCTGCAACAACCAATACCGGGGCAAAGATTATGGTCCCTAT TTT  
CATTGAAGAAGGTGAAGTTGTGAAGTTCGATACCGGAACAGGAAGTTAT GAGT CTCGTGTATCAAAA TAA  
AAATTAGAAGGGGCATTACGCCCCCTTCTCAAGAAGCGTTCCGCCAC TTTC CGAA TAATTGCGAAGGT  
TCAAGATGCGCTTGAGGCTCTAGGTAGTCTCTAGTCG ATTC TGGCATAGCAGCCAAT TTTC TCT ACCAGG  
CT TTTC TTT CAAA TG TTTC TTGCTGGGAGATAGCTCGGTACGAAGTTTT TTTAAA AGAGT CGCTTCTGG  
CGATAGTTCTAACACTTTTT TTTC TTTC ATCGG GAGT CCTTCCAGGTTCTGTT ATTC TCAAGTT GAGT GCA  
GAGGA TTTATAAA GAGATGGTAG TTTC TTCGATA GAAA TGGTTAACG GAGTAGAGG TTTC CTTAAGG CAA  
ATTAATGCCGCTGTGCGA CAAA ATATCC CCCTTCTGGATGTAAGTCTATAATAT GAAA GCGTGCA CAAA  
AGGGAAGTGTAGTGAGCCGCT ATTC ACTACCAGAGGAGGAGATGATC GAGT TCTACATAATGATCATG  
TCCATGTAGATAACAAGCGTACAGAAGGA GAATTC ATCAGTAG GGAT TTTAGAGGGGCATAATT GAGTAAA  
TCATGAGC GGGT CTGTTGTGGGAGATAGAGGAT AATGGTTAGCCACAATCACGTGTTCAGAAGCGGGAA  
GAGAA GAAAGAAA TTGTTT TAAA GCAAG GAGTTGA GAAT CAGTCACTTCTCC ATTC GCTGTATACCAACC  
ATTGAAGCAAGAACAATCGAGAAGAACTAACCACCATGTGG GAGTGAGT TTT TTTAAA GCGGATACGGT GA  
G CAAA AAGTTC TTTA TTAG GAAA ATAG GAATAAA ACG CAAATTT TTTC CAAAGCCCGATGGGTGTATACAT  
CATGG TTTC CTGGAATATATACACAGGAGCTACAG ATTC AACCGGA GAAAGAAA TTC TTTAGC GAAA CG  
GAATTC TGTATCGAGAGCGGTGATGGTCATATCTCCAGTCACACAGACACTATCTGCTTCAAGCTGCTTA  
ACGAGTTGAGG GAAT CTCTGAGAGATTGCAAAAGCTT GAAAG GAAA CGCCTCCTATAAGTTGTCTTAGAA  
GTCCCT TAAAGCG TTTA TTGAAGCAT T GAAA AGGAT TTTA GGG GAGT ACACAGAAGT GAAT GTCGGAGCA  
ATGGAT CAGTC TAAA GCGGTGTGAAGCCTTG CAAA GCATAGAGAAGCGATGGTTAATAGAGAA ACCGATT  
TA TTAACAAGAGCAT ACCCTCGGTATGATAGGC GGAT AGTTAG TAAA AATTAAGTTTT TTTC TCT CAAAC  
TGCAGGAGT CGGTG GGGTAGT GAAA GAAGCTAAGAGAAGATCTACAGCGGTATGCAGGGAACAA GAAAA  
ATATCTAGCACAGC ATTC CAAAGGTGCAATGATTC CTGCAGAGATCATGTCTTCTA CAAATTGAGATACAA  
CATTGAAGCCGAGACTTG GAGT CCCTAGAGAGCAG GAG TTTA TCAGCAACAAGT TTTC CATCC ATATACAC  
AGAGT TAACCAGTTGTTCCAAGA GAGT GCGGCACGCGGTCTGTAAA ATCTGAACAGCAGCTTGTCTTCT  
TGAGAAT GCTCTGAAGAGGAAGAGAGGCTCTGAGT AGCG TAAA GAAGAGCCGCTCCGCCTCCAAGAC GA  
AA CCAGATTC TTTGTT GAGTTTA GCGT CAAA AGAGCTAATTC ATGTAGGGGAGCTGTGTCTCTGCTTAC  
CGGAAT GATTGCGATACTGT TTTC TAAGCGATGT TTTC TTTTT TTTA AG GAGT TTTC GGGATG TTTC GTCT  
TCT GAGT TGTGTATAGCGTGATC GAGT TGTCGAACT TTTAG TTTC ACTACTTCAGGAACCAGATTC TCAC  
AGACAAGTAAGGTATGATCGCGAGATAGTTCTGCCAGGTAC GAGT CCTAGTAGAGGCAGTTCTATAGG

AGGCTTATTAGAGAAAAGCGGCGAGGAAAAGACCGTTGTCCCTGTAAGCAAAGCGATGTCTTCTAACAGAG  
GTGGTATCGGGGATGTGCTACTACTAGAACATCCAACAGTCCCCTATACGGCAAA CAATGCAGGTTAGCTA  
GTGGGTGGGAGCTATCTCCTTACAAAAATGATCAGAGGAGCAAA TTCTTTCGGAGAATTT CAAAAGTAA  
GGGCAGAAAAGGAAAAGACAATGGATTTTCTGATCTGTGACAAAAATTTTAGGAGCTACAATAGGATTT  
TCATGAAAAGAGTCATGAGGGAAA AATGACGGCATTCCGATAGCCCTCAAACGCAAA TATTCCTTCCACCA  
GGTGTAGCGTAGAGCCGCTTC CAAAAGA TAAA GCAACAGCTCCTTCATGTCTGTATAGGCAACGGCTTC  
AGCAAAAGCCTCTCCAATAAGAGGATCAGGAAGATGGGAACGAATGAGCCCCGAGCACT CAAA AAGCATCT  
TTTAGAGAAAAGAGTGC GAATGCAGATAGGCGCACACCGCCTCTT CAAAAGAGGGCGAGGGCAGAAGCTA  
AAAGTCGAGGAGAAA GTCCTTGATCGA TAAAAGGAATCGATGCC TTTAAAAAGGCTCG TAAAAGAAT AAC  
AGAAGAGATCACTC CATCAGCATGACG TTTATGGATCCGT CAAA CTAGAGATCGAGCAAAATAGACTCCA  
ATACGTTCCGAAAAGGATCA GAAA GTTCTATACGCGAAA GAATATGATAGCCTCTCCC CAAAAA AAATCTT  
TCGAAGAAGAGGAGTACGCGGGGCCA TAAAACCCCTTTACTA CAAA ATACGCCCTTATCAAGGCCGTG TAAA  
CAGTTGATGAATAGTATTGCGATGCATCTCATTGTTGTGCTGAGGCATAGCGGGGTATCCTGTAACGGTT  
TC TTCATACCTAGAACA CTACTACCAACTC GCCAGTTAGATCACAACGAGA TTTAAGAAGGTGGC ACCCGGAA  
TCGAACCGGGGATAGAGGCCAAA CAGGCCTCGGCCCTTACCGCTTGGCGATGCCACCGGGAGATATCCGAG  
TGTACGCGATGTTATGAGGAAAAGTCAATAACAGTGTGCATTTTC TGGGATCTTTTT CAAA TAAGCAGGA  
TGAA GAAA AAATTTTTCCTGAAGCTTT TTTATGT GAGTGAAAAGCG TTTCTTTA GAGGTTGAAT TGATAA  
TGGATATAGAATAATTT TTTAAGACTGCTAGTAGAGGAAAGAAA AGA GAATCTT TTTA GGAGATGGCGGGG  
GAGTGCCTTTC TAAA ATCTA TTTCCAAAAGATTT TTTAGTTGTTGGTATTCGGCACGAAGCCAAGGGAT  
CTGTTATGCGCCCTAT CAAATTGGAA GAATGGTCTTC CAAA TTATTAGGTATG GAAA TCCCTCGCTCGGG  
GAA GAAA GTGACAGGAGTTGCTATTGACAGTCCACTC GTATTGCCTGGGACGTGTTT CAAA CTCTTCCCT  
GGGAATCGAACGAGTGGCCACCTATT TTTAAA ACAAGCAGCACAACTCTGGAGCAGTTGCTGCTGTAGTCG  
CAAGCGATTATCATGGTCCAAGTTACGGTCTGCAGTTATTGCGTGTGGC GGATCC TCGAGAAGCTTTTACG  
GGCAGCGGGGCGT ACCCAAGGAGCTCT TTTCCATGGAGAAGTTATAGGAATCACTGGATCTGTAGGGAAG  
ACA ACTAC TAAA AAT CAAA CAAATCAGTTGCT TTTCTTCTGTCTA TAAA GTC TTTA T GAGTCCCAAAGCT  
ACA ATTCGCAGTTGACGCTGCC TTTA AGCGTT TTTA ATGGCCGATGGGGATGAGGATTT TTTA CTCTAGA  
GATGGGAGTTTCTGAACCTAATAACATGAAGAATCT CAAAAGAGATCATTGAGCCTACAATCGGTGTGATC  
ACACATATCGACGTGCAGCATGCTATGCATTTTCTGGATAAAA GGGCTCAAGGTATCGTCGAGGAAAA  
GCTTGCTGTTG GAAA GATGTGGGTGTCAGCTCATTCT TAAA GACTCTTCTTGG TTTAGTTTT CAAA CAAA  
AAAGAATTCGACAGCAGAGCGGT TTTCTTTTCTATGAGCAATGAAA CGGCAGATTT TTTATTATCGAGCG  
ATTCATTC CGAAGGAGTCTTATTAGTGCTCCTGATGGGGACATT GAGTTGCCCTGCCGTATTTCCGTATT  
CTCCAGCGTATATGAAT TTTA TTATTGCAAGTGC CAAAGCTTGGATTAC GAAT GTTCCCATGGATCG TTT  
AGAGCAGGTGAGTCAGTCTCTGTT CAAA CCTGCCATGCC TTTG AACAGCAAGAGCACAAATGGTATCCGA  
GTGATTAATGATGCATATAATGCTAGTCTGATGCAATGCTAGCTGC TTTA GATGCTGTTCTCTGTTCCCTC  
CAGAGGGAGGTAAGATCATT TTTA TCC TTGGGCATATGGCGGAGT TAGGACGATATTC CGATGAATGCCA  
TATTGCTGTAGCTAG GAAA GCTGTGACAAAAGCTCACATCATCTTT CAAATTGGAGAGAAA TGGTCCCT  
GTTAGGGATATAGTTCGTGATGC GGATTGCCAGATTGGGTTTTA TAGCGCAGTGAGCGAGATTATGGATA  
CCGT GAAA GCTCTCGTTCAACAGGGAGATGTTGTGTTGT TAAA AGGTCTCGTAG TTTAGAACTAGAGAC  
TTTA TTACCATGCT TTTGATTTT ATAGG TAAA AGATCAGAA TTTCTTT TTTAGAATAGAAA TAGTTAACT  
TTCAAGTCGCTGTAAGATGCTCTT TTTA ACTTGCCCT CAAAAA GCTTAAGTTTA AGATAGAGAA TTTCTT  
ATAAGAGCTTCCCATAA TAAAACGAGAAAACAGATGCTGCCTCTAACGTATGTTGT GAAAGCCTTTTCTA  
TTGGCTGTTTT TTTAGCCTTTT CAAA ATGAAACC CAAAATTTCTTGGT TAAAAAACAAGGT TTTCAAGA  
TCATATTCACAAAGATCACTGC GAAA AATTAGAA GAGTTACATAAAA GACAAAGCATATATCCCTACAGCT  
GGAGGGATAGTT CAAA TT CAAA CATCTGTGTTGGCGGTTCT TTTATTGTTCCCCATACAGC CAAA GTCTA  
CATGGT CAAATATTGGA ACTATTC TATTATGGGGAGCATTAGGATGGTGCATGATCAGAT TAAA AATCG  
GCGTAGAGTAGGGCATGGGTGCTGCTAAA CATAAG TTTCTTATACA GAATTG CAAA GCGGCGGGGGTG  
GTTCTTCTTATTATGTTTCGCATA TAAAGAAA GT TTTCTTAGT TTTCTATCTTCTT TTTCTAG GAATCG TTT  
CCAAA CCACATCATTTGGTGGAGCTATCTACTCAGT CAAA CTATTGCAACATTGGCTATTGTTGGAACGAG  
CAATTCAGTCAATCTCACTGATGGATGGATGGACTTGCGGCAGGAGCTATGGTGATAGCCTGCTTAGGG  
ATGCTTGCTGTTGCTTGTACTAATGGAGCTCCTTGGGCCTTCA CAAA TTGTGTTCTTCTAGCTACCTTAG  
CTGGAAGTTGCTTTGGATTT TTTA CGTTACAACAAGTCTCCTGCCCGTGTCTTTA TGGGAGATACAGGATC  
CAAA TT TTTAGGAGCCATGCTCGGTATGTGTGCTGTATTATTACGAGCAGAGTTTCTTCTCTTG TTTATG  
GGAGGGATTCAAA TTCTGGAATCACTATCTGTGATTTGTACAAGTCGGAAGTTA TAAA TTAAGAAAAGAAC

GAGTCTTTCCAAA TGCCCC TTTA CACCATCATTATGAGTATAAGGGGTATCA GAAA AGGCTGTAGTGAG  
GAATTTCTTAATTGTCGAGCTTAA CAAA TGTAGTAGTTGGATCATTGCAGTACAAA TGGATTAGAGGAGA  
GT TAGATGGGAT TGGAGCGTGTGTCGTTATCGGCC TAGGTGTCTCTGGGAGGTC TATTGCGCGT TTTCT  
AGCTCAAAAAGGTGTATGTGTATT GGGTGTAGACAAGTCGCTTCATGCACCTTCA GAAT TGCCCGTATATT  
CAG GAAA AATA CAAA GAGAACGAA GAGT TCCCTTCACAGGT GGAT TATGTTGTTCGTTCTCCAG GAGTAT  
CCAAGGAGCATCC TTTGGGTACAGGCTGCGATAGCCTCGCAC ATTC CTGTCATGACAGAT ATTCAGTTAGC  
TTTTCAAACAGAAA AATTTACAGAAA GA GAGT CGTTAGCAATCACAGGGACTACAGGTAAGACAACCACA  
ATATTATT TTTAGAAT ACTTATTC AAACGGTCTG GGATTCCTGC TTTCGCTATGGG GAATGTAG GAATTC  
CTAT TTTAGATGGTATGCA GAATCC TG GAGTGC GGAT TGGT GAAA TCAGCTC TTTC CAGCTCGCTGATCA  
AGAAA AATCCTATCC TGTCTTATCTGGAG GAAT GATTC TAAA TATCTCAGATAACCA TTTA GATTATCAT  
GGGAA TTTCTCT GAGTAT TTTCAAGCCAAGCAAAA TCTTGC TTTA TGTATGCGTAA TCCCGATGACC CAA  
AGGTAGGAGATGAGCGTT TTTA CGGCCACTTGTA TTTA GAAGAAGTACAGAAGTATATGCG TTTA TTAGA  
TAAAGAAA GTGCAT TAAA ACCATTGTACTTGCATGATAAGTACAAC TACTGTTGTGCCTATCTGCTTGCT  
AAAATAGAATTC CCAATATCC GAAA CTAGC TTTA TAGAGGCTGTGGCTACT TTTA ACAAGCCTCCTCACA  
GGAT GGAATACAAA GGGCAAAAGCAAGGCATACATTATATCAATGATAGTAAGGCAACCACGGT GAGTGC  
TACAGAAA CAGCTCT TTTAGGGGT TGG GAAT CAGGCAATTGTGATT CCGGAGGAA GAAATAAGGGATGC  
ACGTTCTCTTCGTTCTTCCCGC CAAA CAAA AGCTGCGAAGAGT GTAGTCGCTATGGGAGAGT GCGCTC  
AGGAGATCGCTCGAGATCTAGAA GAGT TCCCTGTAACCGTAGT GAAA AATTTA TCTGAGGC TTTA CTATG  
TGCTGAAGAGCAAGCAGTGCCTGGAGATGTGATTGTATTGTCTCCGGCTTGTGCTAGC CAAAATCAATTC  
CGTAGCTATGAAGAGCGAGGGGCAATG TTTAAGCA CAAAGTTG GGAT GGAAGAGGTTCT TTTA GAATCG  
TAGAAA CACGATGATTGTAGCAACTACTGTGAAT GCAGTGTATTGGCAGTGTG TTTATGACCGCGCGC  
CATT CAGAGCAA GAAA TAGAGTATCC TCA GAAA ATAGCTCCTAT TAAA ATCTTAGAGCCGTTCCGGTTG  
TTGATAAGGCTCCAGAGAAGTTAGA GAAA AAGCCTGAGGTGATTGCGAAGCCTTCTCAGGTGCTTA GAAA  
TCC TGTGCT TTTCTAAA GCTGAACTTGTGCGCAA CAAA CGGACAAAA ATCC TAAGACAGAGAAGGAATCT  
AGCGGGGGCTC TAAA AAGATTTT CATCT ACCCCTGTAGAAT CGACACTCCTGTGCTCCAGAAA TTTCTG  
TTGTGAACGCTAAGGTAGTAGAGAAA ACTCCT GAAA AAGAG GAATTC TCTACTGTTATTGTTAAGAAA GG  
AGACTT TTTAGAACGTATAGCTAG ATCCAATCACACTACAG TTTCTGCATTGATGCAGTTGAAT GACTTA  
TCTTCGACACAGTTACAGATAGGACAAGTGTAC GAGT TCC TAAA AC GAATAAGACAGAGAAGGAT CTTT  
AAGTGAAG ACTC CAAATCC GGAAGATTACTATGTAGTCAAGGAAGGAGATAGTCC TTTGGCCATTGCATT  
GAGT AATGGTATTC GCAAAGATGAGT TGGTGAAGT TAAATGGAT TAGATGAGCAAAAAGCTCGTAGATTA  
CGTCCAGGGGATAGATTAC GAATTC GA TAAA TCTCTGGAAT TATTAT GAAA TGGTTCCTGAT TTTCTGTT  
TATTAGGAATTT TTTCTCTCGGACTGATCATGGTG CAAA ATACCTCATCAGCAGAGGT CAAA GATCGAGC  
CAAA TCGTGTAGTACACAAAAGCTCTGATCC GGCAGATTACTTATCTT GGAT TGGGACTTGGTATCGCT  
TCACAAA TGTACATCTTAGGAT GGAAGGATTTCT TTTAAA ATGAGCCCTATGTTGCTGAT TTTCTGAGGGA  
TTACTCTTGT TTTA GTTCTTATTC CAGGTATTGGTG CAAATAGAAA TGGAGCTAAGCGTTGGCTGGGAGT  
GGGCGAGTTAAC TTTA CAGCCTTCT GAACAAAT TAAA TATTTA GTTCCATGTGTGCTATC GAATGTTA  
ACAAC GAAA CCTTCT ATTC GTAGTAGT TTTAAA CGATTCGTAGC TTTC GTTGCTCTGTTGTTA TCCCA  
TTATGTTGATAGCGATTGAACCGGACAAT GGAT CTGCGGCTGTGATCTCAT TTTCTTAATTC CAGTTT  
TATCGTAACTGCAGTACGATTACGTTATTGGCTGGTTCC CAAA CTATGTGTTCTGTGTATTGGAGGCACA  
CAAA CCTATCGTCTCCCTTATGTTG GAATCG CAAA CAAGTTA CCTAC ATCC TGAAT TAGATAT TAAAG  
GAAGAGGTCATCAACCTTACCAAGC TAAA ATTGCAGCA GGAT CTGGAG GAGTGC CAAAG TAAAGGTTCCAGG  
AAA AGGAT TACAAAAATTA ACTTATCTTCCAGAAGCTCAGAAT GATTACATTGCTGCTATTTA CGCAGAA  
GAGCAA GATTTA TTGGATGCTCCTATTGATTC TTCTCTATATGGATTTATTTA TAGCGGGTATGTCA  
TTGCAATGCGAGCCTCGCT TTTA TCTGGAGCGGCTCTTGCTA TTTCAATCACTGTGATTATTGGATGCA  
AGCT TTTA TTA ACTT GGGT GTTG TTTCT GGGT TATTACCTAGCAAGG GAGT GAACCTTCCATTT TTTAGT  
CAGGGAGGCTCTTCTCTAATTGCTAATATGTGTGGCATG GGAT TGCTATTAAGGAT ATGTGATGAA GAAA  
ATCAACAAAATCGTATTGGCAGTGGGGGAAACAGGAGGGCACAT TATCCCTGCTCTAGCAGCAAGAGAGA  
CT TTTA TTT CATGAAGACATAGAAGTCTACT TTTA GG GAAAGGAT TAGCTCATT TTTAGGGGAT GATTC  
AGAGATTGCCTATTGTGAT ATCC CTCA GGAT CGCCTT TTTCCAAA CGTGTCAATC GGAT GTTCTCTGGG  
GCTAAGCAGTTATA TAAA GGTATGTGCGAGCTCTACAAAAGATCAGAGAT TTTACTCCTGAT TTTAGCAA  
TAGGACAAA GGAGT TACC ATTC CTTACCTGCTATGCTTGCTTCTATAAGAAGTAGGATTCCTCTT TTTCT  
GCATGAACAGAAT ATTGTTCCCTGG GAAA GTGAAT AAGTTAT TTTCACT CAAA TAAA GGTGTAGGGATG  
TCT CAAA CAGCAGCAGGGGAACA TTTCT CATTGCCGAGCTGAAGAAGTCT TTTCTCCCTATCAGAAA CTGT

CTGAGCAGATCGT TTTCCCTGGAGCTTCTCCTGTCA CAAATGTGGTAGGAGGATCC CAAGGAGCAAAAAT  
TTTAAA TGATGTTGTTCCAAAAGCCTTGGCTCGT ATTCGAGAAA GTT ATTCGAA TTTA TATGTTTCATCAT  
ATTGTAGGGCC TAAA GGAGACCTTCAAGCGG TTTCTCAAG TTTA TCAAGATGCTGGTATCAATCATAACAG  
TTACCGCA CAAA ATCACAATATGCTCGGCGTACTACAGGCAAGCGA TTTAGTGATTAGTAGATCTGGAGC  
AACGATGCTTAAT GAGTTGC CAAA GGTTCAGGTGCCATTC TTATTCCTT ATCC AGGTGCTTATGGA  
CATCAAGAAGT GAATGCAAAATTC TTCACGCATACTGTAGGTGGAGGGACTATGAT CAAA CAGAAGTA TT  
TAACAGAA GAAA G CAAA AGTAAGCAGGT TTTA CTTGC TTTA GATCC TGCAACCAGT GAAA ATAGGCGCAA  
GGCTATGC TTTCCGCACAACAGAAGAAGTCT TTTCAAATCACTGTATCAG TTTACAAA TGAAT CTCTATAG  
GCTCATGAT GAAA AGCTTGT TTTA CCAC TTTA TTGGTATTGGTG GGAT TGGAATGAGT GCTTTA GCACAT  
GTTCTGCTCGATCGA GGATATAGCGTATCGGGAAGTGATC TTTCCGAGGG GAAA GTGGTAGAGAAGCTGA  
AGAA TAAA GGAGCG GAATCTT TTTAGG GAAT CAAGAAGAACAT ATCC CTGAAGGCGCTGTAGTTGTATA  
CAGTTCAAGTA TTTCTAAAGAAA ATCC TGAAT TTTA TCAGC TAAA AGTAGAGGGAACCGTGTAGTTTCAT  
CGAGCC GAAT TATTAGCCGAGCTTGCTCAAGATCAGA TTTCTATT CAAA TTACAGGAAGTCATGGGAAGA  
CAACAGTCTCTTC CAAA ATCACAGCCAT CAAA CAGGAAGCAAA GAAA AATCCGTCC CAAA CTATAGGAGG  
CAAAA AT CAAGAAGGCATCAATGGTGGTTCGGGAT CTGAAT AT CAAA TTGCTGAAGCAGAT GAAA GCGAT  
GGGT CTATTCGGTGTAT ACTC CAGAGT TTTCTGTTATTAC GAAT ATAGATGATGAGCATCTGTCTAAT C  
AAA AAGGAGATCGAGAGCTTCTTCTGGCTTC CAAAAA GAC CAAA CACTCAAGACTC AGCAGATCTGTTG  
GTATAATGGAGATTGTCCTCGCTTGCCTTCATGCTTGCAAGGGCATACT CAAA GAT TGGACTC TTCTTGT  
GATCTACAT ATTC TATCTTATTATCAAGAAGGAT GGAGACTGTAC TTTACAGCAAAGTATCAAGATGTAG  
TGTATGCAGATATAGAAGTGCAATGGTTCGGCATGCATAACGT CAAA AATGCTGCAGCAGCTATGG GAAT  
AGCTCTGTCATT GGGT ATAGATGAAGGTGCTATAA GAAATGC TTTCCAGAGGGT TTTCCAGGAGT TCAAAGA  
CGATTACAAA GAAA GAATTC TTCTGAGACC TTTCTCTT TTTA GAAGATTATGCACACC ATCC TTCAGAGA  
TTTC TTGTACATTACGTGCTGTTCTGCTGTTGGACAGAGACGTAT TTTAGCTA CAAA CCAGCCTCA  
TCGTT TTTCTCGATTAAGA GAGT GTATAGACAGCTTCCCGTCAGCA TTTAAA GATGCTGATGAAGTCTTG  
TTAACAGAAGTGTACAGTGC GGGAGAGGAGGCGGAAGATATCTCGTACCAAGAGCTTGCTGAAGCTATTA  
GTCAA GAGT CGATAG TAAA GTGTACGCAT ATTC CG TTTTCAT GAGT TGCAGAGACA TTTAGAGCAGTCCAT  
CCGTGTACACGATGTGTGTGTATC TTTAGGTGCTGGTAATATTGT GAA CAAA GGAGAAA AGTTAAGAGAT  
CAAA AGCCTCAAAA ACTGCACCTTAG GAATTA CAAA TGGAGG GAAA TCATGCGAACACGAGAT TTTCCGTTT  
TATCTGCAAAAA ATATAGC TAAA CATC TTTCAAAATCC TTTA TGATGT GAGT TATTT TTTA ATACTCG  
AGAAGGAT TATGGGAGAGCGTCTCTTATTAGAGACTGCTGAAG ACTC AGG GAAA TCCGTT CAAA ATCCA  
GAAA TAGCTCAGAGACTA GAAA AAGTAGACGTAGTGTGCCGATACTACATGGTCCCTATGGTGAAGATG  
GAGCTATGCAAGGA TTTCTAGAGACTATTGGTAAGCCTTATACAGGTCCTGCTATCGCTTT TTTCTGCGAT  
AGCAAT GAATAAA GTG TTTACTAAGCGC TTTAT GAGT GATTTA GGGATTC CTGTCGTTCTTATCTCCCT  
TTA ACATTAGCAGGAT GGAAGCAAGAACAAGATAAGTGGTTAGCACATATTGTAGAGGCTT TTTCA TTTT  
CTATG CAAA T GAAA TCTTCGCAT TTTA GGAT CTAGTATCGGCGTCTTCAAGTTCATAATGTTATA GAATT  
ACGAGATGCCATTAATGAAGCT TTTA TGCGAGATAACGACGTG CAAA TAGAA GAAA ATCGCTTAGGTTGC  
AAA GAAA TAGAAG TTTCTGTCTTAGGAGAT GGAT CTGGTGCG CAAA TCATTGCTGGTCTGCATGAGCGTC  
GTGG GAGT GGAGGT TTTA TAGACTATCAAGAGAAGTAT GGGT TAAGTGGCAAGTCTAGTGCAGATCGT  
A CAAA ATACAGATCTCTC TAAAGAAA TACAGGAACAAATACTAGAAGCTGC GGA TAAA ATTTA CCG TTTA  
TTGCTAGG GAAA GGGT CGTGTGCTATTGACTTT CAAA TAGATGAAGAAG GAAAT TTTCTGGTTATCTGAGA  
TGA ACCC ATTC CTGGAAT GACA GAAA CGAGCCCA TTTCTTACATC TTTCA TTCG TAAAGGGT GGAGTTA  
TGAACAGATAGTCCATCAACTTGTATTGATGGGCTGCAACGA TTTA ACCAACGCCAACGCTTGATATCA  
ACGTCT CAAA TAGATCAAGCGTTCGCT ATTCAGTAAGCTCCAACAAGAGAG ACTC CAAA TTGGGCAATCA  
AGCTAATCATGATGATGAGAGCAGCTACAACCTGGGCATACACCTGCAAGAGATCGTACAATGACCGAAG  
GTTCTTCTTCGATGCTAT TTTCCAGCAAAGAA GAAT CTCTTC GAAA TCTTCGGCAGAAGCTGCAGAGAT  
ATAATC TAAA GACAAA ACTTCTTCATCTGTGAGAGAGCCGT TTTCCAGGTTGAGCAAGCTCAACAAG GATTT  
TT TTTCTGCAATCTAGCGCTACACGT TTTA GAAT GGTTCTTAGCGCTTGATGG CAAA TCTT TTTCTCC  
CGATGATC TTTCCAATATCTT CAGAAGCGGCAT GGAT CTCCAGCTTAA GGGT TGCGCTGGC CAAA TCCTC  
GGAT GACC GAAT CTCAACGGCGTTG GGAT CCGGTAAC TAAAT TTTA ACGATGTACGCTGCAAAA TCTTCC  
ATAAA ATCCAATGTAAA ATGAGAAA TAAA AACCTTGATAAGAGT CTCTTGCCCAAGATTGTGGGAA GAAT  
ATAT GAAAT TCTAAA AAAGCGTCAATAT TTTCCGCTTATAGGCCACTATGGGCTAA TTTATGGT GAAA AAT  
TC TAGAGATA GAAA CCTCTTCA TTTA CG TTTAAG TAAA AGATAGTCTTCGCAACGAAGGTCGCAAA TGC  
AGCTTGTGAGGAGAGAAGGCTCCTAGAGAGAGT GCTTGTGATAGTGTGGATTC CAGGAAG GAAA GAG



TC TTTAC GAAAACGTAAGAGT GTTCCAGAAGATAAGGAT ACCACAAATTC TCCC GGATAATGATCGA CAA  
AAGATAAGTCAATGATGCTAGGAGGATCCATCTGTAGTTGATCTATTAGGCTCGTGACAATAGACAGTGC  
AAAATGTGGAATGCGTG CAAAG GAAA GAGCTTGTGTC GAAAAGAAGACTGTAGGTAGTTCTAAGGATTA  
AAAAGGGCAAAGCTGGGAAGG CAAA TCCTTCATAACCTAT GAATGTAT GAGCAAAATTTCT TAAA AAAG  
CTAATG GAGTATGCAAAGCATAG GAAA TAGCTAAGCC TTTA TGATCAGGAACCTTCTCAATA GAAATAAA  
AGAAA AA ACTCCTAATTCATTTAAA AAGTGTCTGGCAGACTTCGTG GAAAATGTCTG TAAA GCTGGAGGG  
GAATCAGCAGAAA GATGCAAGATATCC GAGAAA AAAGGCTCAGGAAGGCAAGGAGGCTCCGTACAGGTAA  
GAAA CAATGTCTTAATAGGCGTTAGG GAGTGTCTT GAAATTTAAA AA ACTAGGCA GAGT CAGCCATAAGCC  
GATGGG TAAA AAGACGAGAACGCTAACGAAGATACACAG GAAA GCGTAGGGAAGAGAA TAAATTC GGCCCT  
TTA GCAAAAAAAGACGCCATATATGTAC TAAA AAAGAGGGGGAGCGGGGGGCAAATAACCTCTAACG  
TGCATCTAGAA GAATC TAAAAAGAAT TGCTTT TTTAAA TAGAAA AAAAGTGAGAAA CC TTATTGGAAGA  
TAAA AGGTAGAGACTTCTTCCGTCAA GAATTTT CATCATTAGATTACAAGCT GAAT TAGAAGGCGAGATTA  
TGGAA TGGATAGCAAGA GAGTACAAAAATATT TTTA TCG TTTCTTTAAA AGGGGATAT GGATGCTGTGAC  
GGTTCCTGCT TTTA GAA GAGTTTC TAACAAAATCC ATTGCAAAAGGACGTGTTAATGT CAAAT TAAA TATG  
GAGAAA GTTTTTTA TATGAGTAGTGCAGG TTTA CGCACACTGCTCTCATTAGCAAAATTAACACAAAATC  
ATAATGGGAAGC CAAA TATCTGTTGTCTTAGAGATGAAGTTGCTGATATTATTC GTATCGCAGGATTGGA  
TAAA GTAATCACCATCCG TAAA GCAGAACAAGAAT CT TTTA GCGATT TTTAAA CTATGTCCTCATCATCC  
TCTTCGGGAGCTGCAACT GGATTC GCTGTATGTTT GGATCC GCAAAAATCTTTTTC AAAAATG TTTAAGC  
GGACAGTG ATTC TGTTGGCTGGGCCAACAGGAT CTGG TAAA ACAGCGG TTTCTCT TAAA TTGGCGCCTCT  
TGTGGACGGAGAGATTATCTCCGTAG ATTC TATGCAGGTGTATCAGG GAATGGATATTGGAACAGCAAAA  
G TTTCTCCTAGCAGACC GTAAGGAGGTTCCGCATCACTTGATAGATGTGTGTCATGTCCAAGAGTCT TTTA  
ATGCTGTTGATTTCTATTATCATGCAGTGCAGGCATGTCAAGATATCTTGTGCGGTAA TAAA GTCCCAT  
TC TCGTAGGAGGGACAGGTT TTTATTTTC CATACT TTTCTATCAGGTCCGCCATCTGGGCCTTCTCCAGAT  
CAAA TATTGCGGGAGCAGCTTACATTAGAAGCGCAGGAACGAG GAATAAGCGCTCTATATCAAGAATTAG  
AGCT CAAAGATCC TG TTTATGCAGCCACTATTACCAAGCATGATAA GAATAAAA ATTATTCGTGC TTTAGA  
AAT TATTCGAAA AACAGG GAGT AAGGTATCTAGTTATGCCTGGCAATCTACCG TAAAT GAAT CAAAAGAG  
TATCATTTGTCGGGGGT GGCTTTTATCTCCAGATCC AGAGT TATTGCGCCATAATAT TTTAGAACGATGTG  
ATCAGATGTTAGAAGAAGGGCT TTTA GACGAGGTGCAGGCTCT TTTAGCTGCTGGATCAAAGG GAATTC  
TTCCGCATCACGAGCAATT GGATACAGA GAATGGATAGAGTCTTT GGATTTA GGAAGCCCACCAGACTTA  
CAAA AGATCACGAAGCAAAAATTTA TTACCAATACGTGGCGTTATACTAAGAAA CAGCGTACCTGG TTTA  
AGAGGT ATTC CAAATTTAGAGA ACTTAGGCCATGG GGATGACTCT GGATGATATGGCAAAGAAGATAGC  
GCAAGACTATTTTCCAAAT GGGTAAA TCCTCATCTAGC TAAA GAGAGCGGGCGG TAAA AGGTATCTCGTT  
CTACAG GAGTAAA TCC TGCTTGAAGTAGCATTGCGCAGATCTCCTTCTCAGAGC CAAA CAGATCC CAGCC  
TGTGCA CAAATGGACAC TTTCTATCAAGTATTGTGCCACCGAAGTCGTGCGCTCCA TAAA AGAGTCCCTTA  
AC ACCCTCTTCTTCCCTTCCCCAAACCATGATGCTGCGATGTGGTCAAATATCT TAAAAAATTC TTG  
CCACCGCAAGAAT GCGGTAATA GAGT TCGGGAGACGCTTGGTGAGGGACGCGTCTCCCTAGTGTGTATT  
ATTAGG TTTATAACTC CAAGGGAT GAAGC TAAA AAATCCAGGATTC TCATCTTGCATCACGAAGAG CA  
AATAGATGTAGCA GAATATCTTCTGGC TTTCTACATGGCCAAACATCATGGTTGCTGTTGAACGGAATC  
CTAAGCGATGAGC GAGCAAATG GAAT TGTATCCAGCC ATCC GGCCCCATTTT TTTA GGAGATA CAAATTT  
CCGAATTC TTTAGATAAGATTTT GGCTCCTCCTCCAG GAATAGTGCGTTGACCAGCTTCCCAGAGACGT  
TCCAAAGCTTGTTCGGTAGAGATCC CCGATA CAAA AGCAGCATGTGCGATTTCTACTGCA GAAA AAAAGT  
GC GGGTG TAAAGAAG GAAATTCCTTT CAAATGATG GAAACTAGAG TTTCTAAGTAGTCAATGCCAA CAAA  
TGGATGA ACTCCTCCTTGTAGCAAAAACGGT CAAA ATGCCAGCTTGAACATAGCGCTGCATTAATGTTCGG  
AATTCATCAAAGGA GAGTAGATAGGCATCGGAAGAACGCGG TTTCTG TAAAATGCGCAAAATGCACAAT  
CTAT TTTA CAAATGTTCTGTAGTTAGGAT TAGCATCAAGGACATAGGTAATAGTAT CAAAAGGGTAGCG  
TTG CAAA CGTAAT GAATCTGCAT GGATTCGAAGCTCTTCCAAGGGG GAATAAAGAAA AAGGCG GAGT CCT  
TCCTGGAACGAAGTCTTGTCTGGAGATCCCA TAAA ACCGTTGACGATAATGCATTTGCCAGAGCAAAC CAA  
AACTACCAATTGTTTTT CAAATCAAGACTCACACTAACCAATAGTTATCATAT GGATATTC CAGAACAGG  
GCTCAAATACACCAGAAGTAGAGCAAGCAGCTTGTGCAATCAAGAAGCGGCA GAAA ATGATCGTGC TAA  
AGATAAGCTCTCTTCTT CAGAGATCTCAGCAGAAGCTGTCCAGAGT TGC GAGT CAATGGAAGCT CAAAAG  
CAAGTGGTTGCAGAACGCAGCTCAATTGAA GAAA AGAT TTTACAAA CATTAGAGCAGATGGGAGC CAAAC  
TAAA AGGTGCGGAT CAGAACAGCGA CAAA AAGCTGTTCTGGAAT GTGA GAAA GT CAAA TCTACC TTTATT  
CCAGCAGTTGGAGGATCC TGTT CAGCGAGCCAATC CAAA GGGGCGTTACACT GAAT TAACAAGGGAAGGG

CGTTATATCAAGAC CAAA CAAGATGAAGAAGGCGC TTTCCTAGTAGGACAGATTGAGCTGGCTA TTTC TT  
G CAAA GAAT CTGGTGTT CAGGGAT TTTC TCAAAAACAGAGAAA GAAGAGATCTCTGAGGA GGAT CGAGC  
TGCGTTA GAAA TTC CTAG CAAA TCTGCACA TAAA GAT TTTC TACAAA TCTACGCATGCAGATCTGCGCTGG  
TTAGGAAG TTTC TCTTCTCAAATTATCAA CAAA A GAAA AGAGCTTAT GAAT ATTAGCATGCGTATGCGGC  
T GAAA AGCCAGTTT TTTC AGAAGTT ATCCGT TTTA GG GAATAAGGTA TTTC CTCGTA GAAA GAAT TAAC  
CGAGAAGGTGAGCGA ACTA CAAA CTCAAGATGTGGAAGCT CAAA TA GAAA GATATT TTTC AAGAGCCTCT  
AGAGAGT CTCTTAAGAAGTCCGTCTT TTTC TTAAGAAA A GAAA TTAAGAGATTGCAGCAGGCTGCTAAGT  
ATCTATCTA TTTC TTCTG GAGT TT TTTC TTTCGACACG CAAA GGACT GAGT CAGTGTTG GGAT CAGCT TAA  
AGGCTTA GAAA A GAAA TCCGCCAGGAACAAAGCCG CAAA GCTGCTACTTCCGCTGA GAAT ATGAAGGAA  
GTTCAAGGGCG TTTA GATCAGGTAGAAGTCTT TTTA CAGGAGAACGAAGAGGTCCATAAGATCC GTAAGG  
AGATAGAGGCAAT TTTC TAAA CAT ATTC GAGGAAT CTCTCTGGTTCATGATGATGTTGTTCTATTGAAGGG  
CCGT ATTC AGAC CAAA TTAGGAGAGGTCCGAGAGAGAGAAGCTGTCATTGA GAAA GAAA TGAAG GAGT TG  
CAAGC TAAA GCAGAGCAGGCTAGGGCAGAAGCA ATTC AAGCACTG GAAA AC GAAGTGCAAAG TTTC TGTG  
ATCAATGTAATGAAGGAGATCTTCTGAAGGGGC TAAA GAGCGTTGTCAGGAGCT GAAA GAAGCTGTGAA  
GAAGATGGCTTATCTGCCTTATGCGAA GAAA GTAGC CAAAGAT AATCAAATCAACGCTGCGCAGAGAAGC  
GTTCTTGACGGCTAGAAGAACAAATGCTAGCTTGTCCAGAT GAAA AAGTAT TAAA TATGCGGCAGGTTT  
TGGAACAAA GAAT GCTGCGGCG TAAA GAGCTCAAAGC TAAACAAA AGTGTGATAA GAAA TTATTAGGGGG  
ATCC GGCCCTCGAT CAAA ACCGTGC CAAA CAGTATAGTGTATGGTGAAGAGGATA GAAA GGCCCTTGAA  
GAGCTTGATGCAGCCATTATC GAGT T GAAA AGACAAATACAGCAG CAAATTTAAA AGCTGATAATGGAGG  
AG TAAA AACAAGTAGTCAAAGGTGAAGAGCCT CAAA GCTATTTTT TTTAAA TTGT TTTAAA GAGT GGCA  
ACTTAGGACTG GAAA ACATCTATGTATACAGCGT ATCC TAGATGGTTAGG CAAA TTCTACTACAGGTT T  
TTA TGTTCATGATGAGAACGATCGCAAATGTTGC GAAA AAAAGCCTTAGCTC CAAAAAATAAAA AATATGT  
CCATAA GGAT AGCAGAGAAGTCCTAATCTTGCTCTGGCATGGAAGTTAGCTT GAGT ACGGTGACTAGGTT  
CAAAA GAAA GCTCTTCAAAGAGT AGGGAT CTCGCTAGAG GAAA GAGGCTATT CAAA G TAAA GAATATCC  
ACGAGAGCTAGGGCTCAAAGGGAT TTTC TCTCTA GAAAAAAGCTCGACCTTATCTTAGATAATCGGTT  
ATTC TCAGGCCAGT TTTA TGATTCTGT CAAATTTAAATTTA TTGAAGGTAATTGT TAAA GCTATTGATAA  
CAAAAAGGCCGTA ACCCTGTTGT TTTAGACGTTCAAACAT TTTC CCAATTAACAGATTAT CAAA TT CAA  
ATTGAAGGGAACGTTGGGGTTCACAT TAAAGCTATAGCTGACACAATTATAGAG GAGT TAAAAAAC TAA  
AAGTCTATCCATT GAAT GTGGAAGGACTTAGTCATAGTGATT GGGT TGTATTGATTAC GGAT TTTA TTGT  
TATCCACTTA CAAATTTTC TTCGGTACGAGAGCAGTATTG TTTA GAA GAAT TGTGGAAGGACGGAGCAATC  
ATTACGCTGATTGTCTAGCTTCT TAAA GGA GAAA GTATGAACAAAAACGTGTAGTCTGTTACAG GAATG  
GGGAT CGTCTCCTGCTTGGGAAT GAAGTAGAATC TTTC TATGATAGCCTGTTGGCGG GAAT TAGTGGAG  
TGCGAACAATCACGTCT TTTC CCTGCGATGATTATGCTACGCGT CAAA CTGGCT GGAT AGAAGAATTTAA  
CTC AGAGCCTTACTTAGA TAAA AAACAAGTTAGAC GAGTTGATCC TTTA TACTTATGCAGTTGTAGCC  
GCAAAGAAGGCAATAGCTATGTCCGTTGGAT CAAGAT ACTC TTCCCGCAGATTC TCATCGTTGTGGGG  
TGATTATTGGTTCTG GAAT GGA GGAT TACGAACCC TGGATGAGGGGATT GAAA AACTATCGGCTG GAAA  
TAGAAA ATTATCTCC ATTC TTTA TTC CTTACATCATTAC GAAT ATGGCTCCGGC TTTA ATCGCAAT GGAT  
TAT GGGT TAATGGGACCTAATTATTC TA TTTC AACAGCCTGTGCAACAGCCA ACTACTGTATTGATGCCG  
CTTATCAACACCTCATTGAGGGT CGAGCAGATGTTATCG CAAA TGGAGGAACTGAAGCGGCTATTAACCG  
TGTGTTG TTTAGCT GGATTTA TTGC GAAT CGCGCATTTGTCAGAAA GAAA TGATGCTCCAGAACAAGCTTCG  
CGCCCTTGGGATAG GGAT CGAGACGGT CAAAT CAAA GGGGAGGGCGCAG GAATTC TTGT CAAAGAAA CCC  
TTGATAATGC CAAAAA AGAGGGGCTCCGATT CAAA CGGAGGTA CTGGCACATA TAAA ACCTGCGATGC  
T TTTC ATATTACTGCTCCTAGAGATGATGGCGAAG GAAT CACTGCCGTGATATTGGGAGCCTT GAAT AAG  
GCTG GGATTC TAAA GAAC GGGTGAAT TATATTAATGCACACGGAACGTCGACGCCTCTAGG GGAT CTAT  
CAGAGGTATTGGC CAAA AAGAAA GCT CAAA GAAGCCACGTCAAAA ACTTGC GAATGAATTC AACGAAGTC  
GTTGATAGGGCACTGCTTGGGAGCTGCAGGAG GAGT AGAAGCTGTTGCAACC ATTC AAGCC ATCC AGACT  
GGGAAGTTGC ACCC AACAAATCAATGTA GAAA ATCC GATAGCAGAAA TAGAAG GAATTC GATGTGGTTGCGA  
ACAAAGCTCAAGATTG GGAT GTCGATGTAGCTATGTCAA ATTC T CAAA GT CAAA GCGGACACA ATTC AAC  
GATATTAT TTTC GAGGTATGAACCTT CATTATGAT GAAA ACTAAGCAC GAATATTC T CAAA GCGTTATTC  
CTATCAGATTT CAAA GT ACTCC GGAT AGAAGTACCT TAAA GGCTTGT TTTA TCTGCCATACAGATGG GAA  
ACATTG GGGT TTTC CCTAAGGGGCATGCTGAG GAAA AAGAAGGCCCTCAGGAAGCTGCTGAGAGAGA ACTT  
GTAGAA GAAA CTGG CAAA GGAT TGTTAATTT TTTC CAAAAATA CAAA TG GAAA ATT ATTC TTTA ATG  
ACAAAGAA GAAA TC CAAA TGCG TAAA GAGGTA ACTTAT TTTC TTGCAGAGGT TAAA GGCGAAGTACATGC

TGATCC TGATGAGATCTGTGATGTGCAGTGGCTAAGC TTTCAAGAAGG TTTA CGCCT TTTAAATTTCCCA  
GAAA TTC GTAATATTTGTTACGGAAGCAGATAAACAAA TTCAAAGTTATCTA CAAA CTTCA TAAA GTCCCC  
TAGGAT GAAAAAACTTGGTTAGGAAGGGCCGTTGTG GAAT CTCCACAACAGCCT TTTCTTTTTC TGTC  
GATTTA CATAAAAAGATTGCAATAGTCTTCGTGAGCAAGAC GAAT GACTT CAAA AGCTTCTTT CAAA CCG  
TATAAA CCTACAA TTTCAAT TTTA GCTGGT CAAA CTT GAATTAAGC TTTCTGGAGT AGC TTTA TAGGTTA  
AGAAA TAGTGTT GGAT CATGTCCAAA ACTGTGCCTGGGC ATTCAGAAA TATCTTCTATATTGCCATAGAC  
TAAA TCATCTTCTAGAACAGCGATGAT TTTATCATCGGCTTCTTCC GAGTC TAAA ATAC GAATCC CTCCG  
ATAGGACGCGCTTGAAGA GGAT GTTCCCTTGTGTAATATTTT TTTCCGTTAACACACAGATATCAAGAG  
GATCGCCATCGCC CAAA ATATTC TCTCTGTTAC CAAA TTGACCACTGT ATTC TCCA GAAA GATCTCCACA  
ATAAGTCTTAGGTAACAGCCCGTATAAGCAAGGACAAAAGTTA GAAA ACT CAAA TGCCGATCC ACT TTT  
AGGAT ACCAG TTTCTTTATCC AGTTC GAATTTA ACG GAGT CCGCTG GAGT GATTTCTATATAGCAACAAA  
GAGATTCATAATCATCGCGTGTAAATACTGGCCATGCCAAGGAT GAGCTATGGAT AATGGTGT TTTAGA  
CATAAGATC ACTC TCTAT TAAA GTGT TTTATGCGCAATTATCC TGCGC ATCCGGCTT ATTCGTCCAGATA  
GT TTTA GTCTTCTGTTCTCGCAG TAAA ACT TTTA TTTATCGGCAGCC TTTCTT CAAA CTTTTATTC TTG  
TCATTGT GAAA AATGTT GAAA AGTTACTCGTGGCAATCC TTTCCAGACAGGTTT CAAA TAC GAAA GACGAG  
AGT GATTGTACTGCAAAATAATATGAGCCGGACGTAGGATAT GAAA TACTC CAAA CAAATAGAAGACCTA  
CATATTGAAGGAT ATGAACAGGT CAAAAA GTTACTTGCAGT CTGTACAGTTAGTTGCTGTAATTGCTA  
TTCATCAGACAAAAGTGGGCCAGC TTTAGGAGGC ATTCGTGCC TCCCTTATCTTCAA CAAA AGGATGG  
TTTA CAAGATGCTCTACG CAAA TCAAAAGCAATGACATACAAAGCTCTTCTCAGCAGTACAGAAA CCGGA  
GGCGGAA GAGT GTCAT TTTCTTGCCAAAAG GGAT GACTAGTCC TACAGAAG GAAT GCTGCGAGCT CAAA  
GGCAAGCTGTAAA CTC TTTA CAAGGGAAGTACATTGCGCCGAAGATGTGGGGT CTCTGTTCA GGATGT  
CATGATT ATTCGTGAAGAGACACCGTATG CAAA TGGTCTTGTAAACAGTCAGTGGAGACCC TTCTA TTTAC  
ACAGCTCACGGCGTGT TTTATGTA ATTC AAGAAA CTGCAGATTACC CAAAGAAA AC GGATATACGAGGAA  
AACGTGTCGCTGTACAAGGGT TAGGAGCAGTCGGACGTAAGTTGGTGCATGAACTGTT CAAA CCGGTGC  
AGAGTTAATCG TTTA CGACACAAG GAAA GATCTTCTCGATGAAGTAGTGAC TTTA TATGGCGCCAAGTG  
GAT GAAA ATATCATCTCTTCGGAT TCGCATATTC TATGCCCATGTGCCTTAGGTG GAATTATTAATTCGA  
TGAGTATCGATCAGCTGCGATGTGCGCTATTGTTGGAGCAACCAACAATCAATTA GAAAATCC TGCTAT  
AGGCAGAGAAT TGGTTGCTAGAG GGATTC TTTA TGCTCCAGACTATCTTGTAAACGCAGGAGGCTTATTG  
AATGTCGCTGGTTCCGTAGGGCGAGCTT ATTCGCC TAAA GAAGTGTAAAGCAAGTGAAGGCCTGCC GA  
AAATACTTCG TAAA TTATACGAACAAGGGGC TAAAGAAA ACCGAGACACAGGGACGTTGGCTGATGCTAT  
AGTTGAAGAGCGCTTAGCTG TTTA TGCTTAGTAGCAGAGACAT GAGTGGCAAGGGGGAGCATGT CAAAAG  
TAGCTTGGTGACGTAG CAAA TATAGAGTCTC TAAA ATCGTGCTATGCA CAAA CTCGTTAGCAGAAGCAAG  
AATCAAAGGATGTCTATCTAGATA TAAACAAA GATTA GAAA AAGGGAGAGGATTC CCCGATATATCTGTA  
ACGAGCCTCCAGCTTCTTCTATAA GAAA CACACCGGGAGCATGGTCTCTGTAGTGGGCTCGTGAGGGG  
AATACGGGATGC GAAT GAAGAAGTCTACCGTATTATCTGCAACCC AAGCGTACAAA CATTGACTATCTGC  
TCGGATAGGCTGAGGATTC CAAGGGAGGTG TTTA CTGAGAATATGTGTAGC TAAA TGTTGATGG TTTCTA  
GCTGATAAGGAGGCTTACAGAA TTTA CAGGTAGGCTG GAAA TCTTCGTGCAGGGAGAAGGGGAAG GAAT  
GGGTAGGAT TACAAATCGTAAGTCC TCGCC CAAA GCTGCC GAATAGAT CAAAAA GAGT TATT TTTAGA  
AGAAGGGCAAGCGATAACGGAGAGAACAG GGGTATGTTCTG TAAA ATAGA GAAA GAGCGATGGC GAAA CAA  
CGTTG CAAA ATGAATCC CGAAGTACCGTCGATA GGGTCCGTTAACCAAATAGTGAA GAGTGGGAGC TTT  
CCGGAGAGAGGGCCTGATACAAATCTTGACAGGAGAC CAAAGGATCGAGCTGCTGCGCAAATGTAGGAC  
AAAAGGGATCCTAGGGT GATCCGTGGCAGGATTGAGAG TTTCTTCTCCGACCAGCGG GATATGCGGAAAT  
AAA GATGTCAGTT CAAA G TAAA AATAATATTGGATAGCGTAATCAGCGG GAGT AACGTATGTCTGGTCAG  
GCTT TTTCCAAAAGG GAATAAATTTA TGAGCT TTTCCGATAGCGCATCAGTGACAGCATAGCCTGCATGAC  
AACTG TTTCCGCAGCTT CAAA GCAGTCATTGAGGAGGGAGAACAATAAGCT TTTCCGCTGGTTGCAAAGAG  
GTAACAATC ACTC ACTATAGGGAGC GAATGTTGCTGTAGTGAGAGGAC ATCC TAACCAGAGAGATAG TTT  
CTTAGCAAGAGCAGAGCTATTGTA GAGTTGCGCAAATAACTTT GGA TTTCTG TAAA GATTATTAAC GAAAA  
ATATGAAGCCACGATATCTT CAAA ATAA TAAAT GAAA GAATAGTCT TTTCA GAATGCAAACCTGTAA  
CAAA GATATG GAAA TATTGCACTC CAAA GTGCAA GAAT AAT TTTA TAAA CCAAGAGGAAGTATGAAGAT  
AGGGT CAAA GCGTAGACTGTATGAGGTGTGTTATACTTCTCTTATA GGGT GCGC CAAAAA CTTGCTAT  
CGTGTATTAGTCGAAG GGATAGAGT CTATTAACCA GAATTC CCAGAAGGGAGC TTTATTTCTTTCTAATC  
ATGTAGCAGAGATAG ACCCTGTCAT TTTAGAGCACGTGT CAAA GT TAAAG TTTCCAGTGCGACCTATAGC  
GGTAGATTA TTTA TTC AATAATCC AGTGG TAAA ATGG TTTCTTGATTCTGTAAGAGCC ATCC CTGTGCTT

TCCGTCGTCCTGGAAGGGATGATAAGCGCAAACTTGAAAGGATAGAGCGCTTTTATGTATGCGTGACCC  
AAGCGCTAGATCGTAAGGAAAAGCTTGCTTCTTTATCCATCAGGACGATTGTCTAGAAATGGGAAA  
GATCGTTAATCAGCAGGACGCTACACTATCAAAACCCGGCGAAGGAATGTGATGTATTCCTTAGTTAAG  
ATCACAGGACCAAAAGGAAGTTCTTTTCACGCTATAGAACAGGAAGCACACCAAATTAGGTAAAAGTG  
TTAAAAGGGCGGTGAAAGCCTTGTGCGGTGCGGAATTTTCTTCATGCCCAAACGCGAGGTACGGGTTTC  
GGCAAAACCTGCAGATTACTCGGTATGAAGCAGTTCCCGACAAAACAAGAATTC AATACTTTCTCTCG  
GATTTGGTTTAATCAAGAGGGGGGGGAGACTCCTTTAGAGGTCCCTACGCATAGGTAAGAGATGCGAGAT  
AATAGGAATACAGCTAGAAGTAAACGCGGAAAATTACGATCAGAAA AAACCGTTTACGCAGTTTCAAAA  
AGCCAAAAGCAGAGATGACTACGGCGACGGTTTCAAAAGGATGAGCAACTTGGAAAAGCTTTCTACAATCA  
AGTGATAAGGCTGCAAAAGCTTTTAGCGACACGTTTAGCAAAATATCCCTGATCAGCATATTGGAATATG  
ATGCCCGCATCAGCAGGCGCCTATATGCTTATCAAAACACGCTTCTTTTCAGGGAAGATTCAGTGATGA  
TTAACTGGAGTCAAAGGGTGTGCGAGAAGTAACGGCGTGCCAAACCTGGTTGGTGTGACTCATGTGATTAC  
AGCAAAGCCTCTTATGCAAAAATTGGCGCAGACGCATGGAGAAGATGCAGAATATCCTTTTTCTTAATT  
TTTCTAGATGAGGTTGTAAGGAATATCTTTTCTAGAGAAGTGTCGAGTGGGTACAAAATGTCCATAC  
CTCAAAAATGGATGATGCGCTGGTTTCGGAGTGCAAAATAAAGACCCTGAGGATGTTGCTGTCATTCGT  
CACGTCAGGAACCGAGAAACTCCAAAAGGGGTTCCTCTTACTAATGCCTCACTACTTGCTAATCAACGG  
GCCTGTTTTCGATTGCTTTTCTCCGAAAAGAGATGATGCAATGATATCCCTTCCCTCCCGTTTCATGCGT  
ATGGGTTC AATTCCTGTACGCTGTTTCCAAAATATCCGGGATACCTGTTGTTCAAACTTATAATCCCAA  
ATATGCGAAGAAAATAGTTGAGATGATTGATGAAGCAAAGGTCACAAAATAGGAAGTACGCCTGTTTTC  
CTCAGTTATATTATTAATGCTGCTAAAGAAAAGCAGACACGCTTCTTCTTGCCTGTTGTTGTTG  
GAGGAGATGTTTTC AACTCTTTATATCAAGAAGCAAAAAAC TTTCCACATGTTCAACTGCGTCA  
AGGATATGGAACTACAGAATGCTCTCCGGTTATCACTATTAATACTGTGAATAGTCCGAAAATGAGTCT  
TGCGTAGGCATGCCTGTTAGAGGTATGGAAGTGTAAATGTTTCTGAAGAAAATAAAAGTCCCTGTATCAA  
CCGGAGTAACAGGATTTGGTCTGACACGAGGAACCTCTCTATTTAAAGGATACAAAAGGAGAAGACTTCGG  
ACATGGATTCATAGAGTTAGCTGGAGAGACTTGGTATGTCACCGCGACTTGGGGTATGTAGATCGCCAT  
GGGGAGTTATTCCTTAAAAGGACGACTCAGTCGTCAAAATGAAGATTGGGGCAGAAAAGTGGTAGCCTTGAGG  
CCATGGAGAGTATTATTATGGAAGGATGTGGGCAAAATGCTGCCGATCATCCCAAAGTGGCAAAAGCCCT  
CCCAGGAGAAAAGAGCGTCCAAAACCTATTCACGATATTC CCAACTTCTGTTTCGGAAGTAAATGATATC  
CTAAA AACTCCAAAACAGTAACCTATTGAAAATTTCTTATCACCATCAGGTAGAAGCGATTCCTATGT  
TGGGGACGGGAAAAGCTGATTACTGTTCTTAAATGCAAAAGCAAACGATTATTTAGCGAATAAGGACT  
GCTCCAAA AATGATTATAGCTATGAGGAAAATGGGTCAAAAAGGAAGCTCTTTC TATTGATTTTATCACT  
AATGATTTTCTG GATTCCTCTCGTTTAGATAGCTTAGTTCATGCTGTTGAGGCTCGTTATCGGC TTTATT  
GTAGAGACAAGCCTCATGCGCAGTTAGGTTATGGAGTTCCGCGCCTATTTTAGGCTCTTCCCTGCTGTT  
AGATGGGTAGAGCATCAATAGCGCACTTTCATGGCGCTCCAGAAGCTCTTATCAAA CCAAGTGGTCAA  
ATTGCGAATACTGCGACAAAATGCGCATCTATCTCCGTAGCGGATATATGTGCTATGGGACGAGCAGGTGC  
ATATCTCCGTTTCTTACAATCTATCTGTTTTCAAAATCGGGTGGCATCAGAGTTTC CGCCATAATGATCT  
GGATCATCTAGAGTCTTTATTAGAATCTTGTGCAACGTTGGTTTC AACGAGTATTTATCCCTCGTCTGT  
TCTGTCTATTCCTTTAAGGGTCTCAAACTCCCAAAAGACAAATAGTGGCATTGTCTCATCAGTATCACG  
CTCAGTTGATAGTTGATGAAGCGCATGCTGTGGATTA CAAAAGACGCTGGGAAGGATCAAAATGCCTC  
GTTAGGGTATGAAAATTTTATTC TGTACTCGTTACCTCAGTAAAGC CAAAAGGATCCGCGGGTGCAGCT  
TGGTTATCTTCTTGCATAGGAAGCAGGACAAAATCAAAGAACCTATGGTAAGTCTTTCTACAGGAATAC  
CTCCCTA CAAATTAGTATCTATACAAGTTGCATACGAATTTCTCTCACAAGAAGGAGA ACTTGCAGAAC  
ACGATTACGTGCTATTCGTGACTATCAAACTCAAAAATCTCTTGGGCAGCAGCTGGACAAAATGCAACCG  
CTCTCTCTCCCTGGATCTCTGAGCAGGAATGATCAAAAATAGTTGCCACAGGCATTCGTGTTGAG  
TCGCTTGTCTCTACAGGTAAAAGTACTGCGAGCCAA TTTACATGCTTTCAATAACGAACAAGAAGTAGA  
TATCAAAAGTTTCGTTGCTTGCCACGGAGCAAGTAACGTATCAGAA GAATGTCGTAACAGGATCTACATCA  
ACAATGCAACGCACPTTAGAGGACAATCAAAACAGCGGCTAATGCCTCTTGAATCTGTTTATTCGCCACGA  
GGATGTTGCAGTCAAATTAGAAAATGATAGTGAATAAGTCTTTTAC CAAAAAATGTCACAAGGAGA  
TATTTCCATAAGAGAGGCTTGAGAAATCCAAATCAAATTTAATCAGTGTGTGTACACGCTGAGTTTCCTT  
AAAGTATAATCCGAGCATTTTCCAAAGAAAATACAGCGGATTAGTCGTGTGAACGGAGGATAGTTACATA  
CTTTTCTCCCTAAGATCTCTTCCCTGTAAGAAAAGCTGGGAAATCTTGTGCTAAGGCATGAGATATAGTCA  
GTCAAAAGGAAGAAAATGCAAAAGATAGA AACTTCTCTTGGAAAGGTGGCTGCGTCTGAGCGTCCAGTGACT  
TGAGTAATCAGTTGAAAAGACTTGTTCGCTGCTCGAAAATCTGGATATATAGACCAAGAGTCTCCGCTTA

AAACTACAGAAAGAGT CACGGCAGGAAAGTGCATACCT CAAA CAATCA CAAA TGTGCCAATAAGAAATATC  
GGC TTTC CCTGTAGCAAATTG TTTAAC TAAAGCATCATGACTTCCGCG GAAT CGTGTGGTGTCA GAAT CT  
AGCCGTATAGTGC GGGCTGTTGGGAA GAATTC TCGGAGAAGAGT CTCAATTT TTTC TGTTCCAGTGCCTC  
GGTATTGAAGTGT CATAGTGCCAGGCATTGAGGGCATGAGGTAATGGGC CAAA AGAGGC GGGT GTTGCA  
AAGGTGACACAAGA GAATCC GCTCAGT CAAAT GAAA TGTC GAAT CATGT CACAATGAGGACAT TTTC AAG  
GTGTACTTACATGATGAGCAGGAT ACATTAGTATG GAATCC GCGACGATTGAA GAAA ATAATGGTCTGTT  
CTCCTACTTCCAAACGTTGCTCGATGCTCC GAAT GACCG CAAA AGAGAA GAAA GGCTT TTTC GAGT TT  
TTTC TATCTCCAAGTTCATGTGATAA GAAAGAC TTTA GTAGGAGT AGACGTAGAAGCTCTT CAAA AGAGA  
ACG GAAA GCGTGTA TTTC TTAGATAAGGCA CAAA TGTAAC TTTCTAAA CTTG GAGT GCGCTACCTAGGA  
TGACTGTAGCATTGGTCAT TTTC CCTCGCATGACAGCCACATCTCGAGCTTGA TAAA AAGGAGGCAAATC  
GC CAAATTTA TAGGCGTGTGCTGCTCTT CATCC ACAATAAT GAGT CCTAAGT CAAA TATAGGACA GAAA  
ATGGC GGAT CGAGGGCCTATAATGATGTTAATTAGGCCTCGAGACGCCTTGTGCCAGGTCTGTGTACGTT  
CACTGTCACTTAACTTGTAGTG TAAA ACGCCCACTTCGGAACCAAAGTGCAT TTTAAA AAAG GAAA GCGC  
AAAAAT GGT TAAA GCTACCTCAGGGACAAGAA GAAT CACGCTCTTCCC TAAA GCTCTAGC CAAA GAATG  
ACTTGCAGATACACTTCAGT TTTC CCGCTCCCTGTC ACTCC GAAT AGCAGACAGG CAAAAA TTGTTCCG  
CAACGAGCGATTGCGAGATGGTATTGATTGCATCTAGTTGTTCTTGATT GAGT GTGGGGGTCTCTGGGAG  
GAAA TAATG GAGT TGTTGCTCTT GGAT TTTC TAGATCTGCTGAGT CGACAATGC GAATGAAT TCAA TTTT  
ACCAAGGCATCCAAAAGTT CAAA CAGATACCTCTGTT TTTC TCATCAGCTCAGGGG GAGTGAGAGGC CAAA  
TCGT CAAAAGTAG TTTA CGCAGAACAGCGA CAAA CTGTGGGT TATCAAGCGT CAAAAGTATTTTC TTGTGT  
ACGCTCTGCAT CAAA CCC TAAA AATACATTGTTCTGATGCTTAGTT GAGT GCG CAAA CCGGTATACCGTG  
GGT AG GAAT AAGGAT ACGGCGCTTCCAGAGGACAAAAGTAATATTGACTGATCCAAAAATCAAATCGA  
TAAGGTCTTGGGGAA GGGTAATGCCTTCATAACTGATATC TAAA ATAGGCTGGATTACATGAACAAAATC  
AGAAGA ACT TTTAAT CAAA AGCACAATGGCAAT TTTA TACAAA TCA CAAATCAGT TTTCCAAA CAGGGGA  
ACCTTAACAACAG ATCC TACAGTTACTAGGT TTTC CAATTCAGCAG GAATGCCGTAGTCTAGGAT TTTAT  
TGATA CAAA CATTGACTATGACTTCTGCATAGAGGCG GAAAGGCTGGT GAGTAGGGTCCATAAAA TCTCTT  
TTTAATGCT GAAT CTT TTTC ATATTGGGAAGAG GAA TAAATGGGT ATGCAGGTTACT TTTATCGTGC AAAA  
CAGGAT CGTGATAGTTCACTTGC GAAT TTTA TACCTGATTGTTGTAAGGGCGC TAAACAAAAAGGATG  
AGGG GAAT GAC TAAA ATCAGACAAAGTTT CAAAG TAAA AAAGAACGAGGCGAGTAG GAAAAAT TTTC TGT  
GAAA GAAT TTTA GCTAAGCGAT TAAAGAAAAGAAT CTCATGTTCTGAGATTC ATGGACAAAAATGCCAC  
ATGAGGCCCTTGCAGGTGCTTGAAT ATAACGT TTTAAA GCAGGATAAT TTTCTTTC AGTAGTTCTTCATG  
AGAGAGTCCAGGG TAAA TAGGAACACAGGCCCAG GAGTG CAAA GATTC TTTA GGAT GGGAAAGGTGGGGGA  
ATAGAAGTTGTAACAGGGT CAAA GAGT TTTC TACCGGAAGAGCTTGC GGTTCTAAGCCTGGG GGAT TAA  
GAATAGGAGCCGT GGATGGAGATAAGTCCTCG GAAA AGGTAAGAGGTTCTTCTG GAAA ATATAATGGGAC  
CAGTATAGACGTGGCG GGGTAGGGCT TTTC TGTGTAGCGAT TAAA AA TTTC TT GAAA AACAGTAAGT GAA  
TGATGGCGTGTCAACAGGTGCACAGGTTG TAAA GAGAGACATTGTTCCGGAG GGATAAGGTTATCAGCC  
CAGAC GAATTC ATTGCA ATCC ACGCATCATTGTTATCATAT TAAA GGCTAGAT TAAA GCAATTC CTTACAA  
T TAAA CAAAGAGA GAAA ATTATGA GAAA CTGTTATTAGGGAGCTTGTCTCATCGCATGTATGGCGGTCAC  
AGCTCCTTGT CAAA CTGCAAAACGTCGTGCTGC GGGT TCGCAGAAGATCAATA GGGT TGCAGAGACCGGA  
ATTC ACTGGATGCTTATCAAGATGC CAAAAAT AAGGCAAAACAGGAAG GAAA GCATGTAGCCGTATTTT  
TCACAGGATCCGATTGGTGTA CAAA GTGTATGA GAATGCAGGAT CAGAT TTTA CAAACAGCTGCAT TTTC  
CGAG CAAA TAAA CAATA CAAATGTATGGTGGAGATAGAT TTTC CCTCACAACAAAGAACAAACTGCAGAA  
CAAAAAGAGCAGAAT CGTCACAAAAAA AG TTTA TATTC TGTAGAC GGATTC CCTACCC TAGT TTTC CTCG  
ATTC CGAAGG TAAA GAAGTCGCAAAAATGGGACAAA AGCCTGGAGGCGGAGAGGCATATGTTA TAGAT T  
AAA GCAAGCATTACATATCTCCT GAGT ACGCGCGTAATTC TCTTT TTTAATAAGAG GAAA AACGTGTTCC  
ATTC TCGGAT TTTC TAA GAAA GAGAAA ACGATCC AGT TTTC TC TTTC TAT CAAA GAGAAA GCAAGCTGCAT  
ATCC TCTCTTCAAAT TTTC TCAAG CAAAATGTAGCATGAT GAGT CTGCTTAAGAC TTTA GTGATTGTC  
GTAAGAA GAAA AATATGCTACTATT CAAAAGCCAAAGGACGGTTGATGTCTGTAGAAGTT GAAT ACTTG  
CAACACGAAGATTA CAAA TATAGAACAAGCAAGC TAAA GAAA TCAGAGACAAA GGCA TAAA TCC TT ACC  
CTTATCAATACACTGATTGTCTTGAAGTACAG GAAA TTC GTAATCAG CAAA TAGATAAC GAAT TAGGAGA  
TAGCGAAGCGGCT TTTC G TAAA GAGACACCTAAGGTGCGT CAAA CCGGACGACTTGTCT TTTC CGTTCT  
ATGGG GAAA AATGCT CAAA GGCAG ATCC TCGATAATGATGCAAAGATTCAAGTGATGTTCAATCGAGATT  
TTTC TGCAGTGGCAG GGGT TAGCCGCG GATGCTGGGAT TTTC TCCGAT TAAATTTA TTGAGAA GAAA CTTGA  
TCTAGGAGACATCTT GGGT CTCGAAG GGGTATCT TTTC TTTACTCACTCAGGAGAAT TAACGGTCTCCTGTT

GAAA CGGTAACGTTGTTATG TAAA TCCTTAA TTTCCAAACCTGATAAGCATGCA GGATTAGCAGATAAAG  
AAA TTCGCTATCGCAAACGTTGGGCAGATCTGAT TTCCTCAGAGGATGTGCGTAAGAC TTTC TTAACAAG  
AAGCC GGATTC TTAAGTTG ATTC GTGAGTACAT GGAT CAGCAGAGCTT TTTA GAGGTG GAAA CTC CTATC  
TTGCAAACCGTCTACGGAGGAGCAGAAGCAACTC CTCAAATTACCACGCTGCAAGCGCTACATGCA GAAA  
TGTTCC TAA GAAT TTC TCTAGAGATTGC CAAAAA AA ACTC CTTGTTGGAG GAAT GTCCC GAG TTTA TGA  
AA TCGGCAAAGT TTTC CGTAACGAAG GAAT CGATAGAACGCATA ATCC AGAG TTTA CCATGATAGAGGCT  
TATGCGGCTTATTG GGAT TACAATGATGTAAT GAAA TGTGTG GAAA ACCTTGTG GAGT ATATCGTACGTG  
C CAAA AAT AACGGG GAAA CTC AGGTT CAGTATTC ACA TTTAAA ATCAGGACCTCAGGTTGTTGAT TTTAA  
AGCTCCAT GGATCC GTATGACGAT GAAAGAAA GTATCTCTGTCTATGGCGGCGTCGATGTAGACTTACAT  
GCAGATCAT GAAT TACG TAAAAT TTTAGAAA CACAAACATCTCTTCCAGA GAAA ACGTATGTT CATGCCT  
CACGAGGAGAGCTGATCGC CAAA CTA CAAAATGAGCTGG CAAA TGATAAGCTCATCGCTCCGCATCACAT  
TACAGATC ATCC ATTA GAAA CAACGCCAC CAAATAAA ACATTGCGTTC TGGGGAT GAAA CTC TGGTAGAA  
CGA CAAA AGAGT TCAA TTTA G GAAA AGAGT TGTGTAATGCTT ATTC GGAAC TCAATGATCC TTTA CAAC  
AAC GAAA ATTGTTGGAAGAGCAAATGCG TAAA AAGGC TTTAAA TCCTGACAGC GAAT ACCATCC TATAGA  
TGAA GAAT TTC TAGAAGCTC CAAA CCAAGGAAT GCCTCCTGCAGGAG GACAAA GAAT AGGTATCGATCGA  
TTGGTTATGATGTTGACAGACGCTGC ATCC ATTC GGGAT GTCCCTGTT TTTC CCTGTTATGCGGCGTATAG  
AAGCAAAAAAAGAT TAAA GTTT TTTC AC TTT CATCC CGGT CAAA CCATCTTCAATGGCAAACCTCGGGA  
TAAGATCTCATCACGTAGACGATCC GCTTCCCTGCCAGTTC TTTACT TTTC TAGCAGCCTCTC CAAA CTCC  
ACAAGAAGTAACACCTCTTCTG GAAT ATCTGGTTGT GAAAAGGGCAA ACTC CAAGCACTTGATCTATCT  
TTC TTAGTAAGGCGA GAAT ATGTTGCGGCTTG TTTAGAAA ATACGGAAGAGT CTG TTTC TGTCT GGAT  
ACCAGTATGTTGGTCAATGCTGCTG TTTA TTTC CGAATAAA ATCAA TAAA GCGGC TAAA GAAGAGGAG  
ATATTC AGGT CATT C GTCAAAGAAGTAATGAAGG TTTCTAAA AAC CAAAACAGGCTGTAGCTACTTCAG  
GGTGTATGATGTCATCAGGATACGAA GGATCTTCCAGCCTACAAA TAAAGTCTCTTAAGCG TTTA AGTGA  
CTGGCGAGAAGCATGCAATCC TTTCT GAGTAAA TTTA ACTGCGTCTGTAGTGCCTTGCAGCAAGAGA  
TAACGACTTCCCTCTCCA GAAA ATCC TTGGTCCAGCAAATCTCG TAAAGT GAAA AAGTTCCCTAAGCT TT  
TAGACAT TTTC TTCCATCAACGAGGAGGTGATGA GAAT GCAGCCAATAACGCACAAAGGG CAAA TGTGA  
TAAGGATTCGGAT TGTGCGATCTCAT TTTC ATGGTGAGGGAAGATATTATCTACTC CTCCAGCAT GAATA  
TCGAG GGAT TGCCCAAGAAGGGACATAGACATAATGGAAC ATTC TAAA TGCCATCC CGGGCGTCC TTTC  
CAAAGGAC TTTC CAAAAAATCTCTCCATCGCGATCAGGAT CATAAGC TTTC CA TAAAACAAAGTCACA  
CAAGTT ATCC TTATCAT ATTC ATCTGCATCGATACGTGCGCTA TTTC TGAGCTCTTC TAAATTTA AGTGA  
GATAGAGCTCCATAGTTAGGGAAC TACTGATG GAAA AATAGACAGATTGGTCTTGGCCTATGTAGGCAA  
CCCCTTGATTGATAAGTTGCT GAAT AGCTTCAATCA CAAAAG GAAT GTAGT GGGT GGCATGGGGAT AAGC  
ATCC GC TTTC AAGATGTGCAGAG TTTCTAAA TCTGCAAAAAAGCAT GAAT ATAAGGCTGGCAATACT TT  
TCAAGGGAACAACCTTT TTTA CGAGCTCCAGC TAAA GTCTTGT CATCGACATCTGTGAT ATTC ATCACGT  
GATAAA CCGAGTATCC TAAAAGAGCAGG ACTCT TTTC AGTAGATCTTC GAAT ATATACGTGC GAAA ATT  
CCCTATGTGTGCGTAATCATAACCCGTAGGACCGCAGGTATAGAGCTTGACAGGAT CGTTAACAGGGAGA  
AAACGTTCCCTTCTCTCTAGATA GGGT GTTATACA GAAATAAA TCTATAGCAGT ATTC ATAC GAAA AGGCC  
TTGTT CAAA TACTGTTAGAGC GAATCCATCC CTT CATGATAAGCAACCT TTTC TCCTTAGTCTATAGAAT  
TTTC CACAGAGCGG GGATTC AGCATTC CTTGT TAAA GAATAGAAA ATATTC CAAAATCAGAAGCATAGC  
TATGTCGT TTTC AAGAGAGAAT CCAA CAAACT TTTA AT GAAAAAA GAATATACAC GAAA AGTGTTC GA  
AAAGCTGC CAAA GGAGAGGG TTTC TCTGGGT TTTC GATGGTGTGCTTA TTTC TAACGAACAAGTAAGGAG  
TAG GAATTC ATGTCTTC TTTA C GGAT TGCTAGAAGTTGCTC TTTC AAGCAGAAA ACTC TAAA GCTGCC  
TAGT TTTC CAAA GACTAGGTGCGTCTCAGGTATGCGCT ACTC CTTCTA ATTC CAGAGAGATTGCTTGGA  
TG TAGATTATCAAGAAGCTAGGGACGA GAGT AGAGA GAAA GA TTTA CCCATGTTGTTGTT TTTC TCTGGC  
TCTGATTG GAAT GGTAGTTGTAT GAAA ATCC GTGATGAAGTGCTAAGCTCGTC GGAT TTTC ATCTCAGCTG  
TTGCTGACCAA CAAA TGTGCGTAGTTGTCGA TTTC CCTCGTCATACA GAGT TGCGAG ATCC TCTCA TAAA  
CGAGCAAATGAAGA TTTAAA GAAT AGACTGTATGTCAATACCTTCCCTAG CAAA GTATTGTTGTCCCC  
GAAGAACGAGCGATCTATAAGATC GAAA GT CAAA GAAAT GAAA AT GGATCGAAT CTAGGAGAGAGCTTGT  
GCAGAGT CATTGCTAATGACCAGGAAC TAGAACAAGT TTTC CC ACTCATCC CTACACTATCTTCGGTAGC  
GTTAC GAAA AACTATCAGCTCGCTGAAGAGCTATCGC GAAA AGA TTTC ATGGCAACAGCTCTTGAGCAG  
GGGGT GTTGTGCGATGATAGCTT TTTC CTATCC GAGAAG TTTC GGCAGCTCGTTGAAGC GGGT GAATGG  
ATTC AGAG GAGT GTCGTGCTGTGA GAAT CGGTTGCTA GAAT TAGATCCTGAGAAT GAGCAGCTCACGCA  
TTTC ACAGTGGC TTTA ATT GAAT TTC AAGAGT TAGC TAAACGTTCTCAAGGGCAGTCGCACGT GAAT GTT

GCTGAAGTAATCGCACC TTTAGCA GAATATCTTACACAA CAAA GAGAACAGGAT AAA GAGAACCAGTGA  
GACTTGAGATGATTA TTCTCAATATTATCTCGATGCTGGGCTCCCTAATAGTGCCTAGAGCAGCAAA  
GATAGCT CAAAAAT CGGCTCCGCAAGAT ATCCAATCCAGCA TTTC CCGTTCGT TAGTGCATATAGAACAC  
CAATCC TAAATATA ACTCACAAATCTAGT ATTC CTCCCC ATTC CATGCCTCTATAGCGTGAAT GGT  
TT TTTAGGATTTCTACCTCAGCATCT GGATGAAGAGGCGAGGGGCAAAGCCTCAGGTATGCGCTGAAGAAG  
TTCTTCTGATAG TTTC AAAAAATCTGGCTGC GAATTTTC CTCTCGGA GAAATAACCACCTGACA ACCGGA  
AGACAAA GGCCTACATGTC TAAA AGCCTCTCGTACG ATCCGCT TAAA ACGATTGCGTTGATGAGCT TTTC  
CAAA TTCCAAA ACACAGTAATTC CTAC TTTA CTGGTGTTT GAAT GACGAGAGGGAACG ACCG TAAA GT  
CACTTGATCGGCACGACAACAACGTCC ATTCCTCTGAACA TAAA CAAATTG TTTA CG TTTCAG TAAA CGA  
GC ATTC TTAGG TAAA GTTAACCGACTC AC GAATAGAAGATCT TAAA GATCAATTAAG GAAT GTCTACCAT  
GACGGCGACGGCG ATTC AAAAGA TTTC TTCCGCTT CAAA TAGCCATGCGAGCTC TAAA TCC TACG GAAT  
TC TACGC TTTC TCTTACTAGGTTGATAGGTGCG TTTC ACAAT ACTC TCCTAAT ACTC TTGAAGTC TTTAG  
GGACTC TGCCCCAAAGAGACTAGGGAC GAG TTTAAA GGATCTCACC TAAAAGATCAATACAGGGCAACAA  
TT TTTA TGATTTTC TTGAGTAAAGAAA GTAGTTCCAT TAGTAGATA GAATTC TGAGCAAGTCTCTTATTGT  
CAAAAAGTGAG GAAA GGGTAAA T CAAA TTCTCTAGTTGTTAATCC TCCTTTA TCC GGGAAAGGCTCTTG  
CAAA CAATTC TGTGTATGGAGCGTGGGCTAGTGCCTTAG GAAT GCGTAGAGAGCAGAGATCACTGTAAAG  
AAACT TTTACGGTT TTTAGTTGTGCTGCGGAT TTTA TAGCAAAA GGGTACTTCTTGTCCGGTAGGAGGAG  
GCTGT CAAA CTAGGGGCTCTCA TTTC TAAGTAT TTTA TGTGGTGAGGGTGTAGTAA GAAT CAGTCTCTTT  
TTTAAGAGCCCAAGTAAGGCATATTATGAGAGT TAGTTC ATCC ATCAAAGCAG ACCC CTCAAAGGTGAC  
AAGCTTGTTTCGTGTAAGGGACGTC TTTATGTTATTAACAAGAAA ATCC CAACCGTAAGCAGCGTCAAG  
CAGGGCCTGCTCGTAAGAAGTAATATATAGAT TTTA GGTGAGAACGCATGGCGAAGAAGTCAGCAGTAGCT  
AGAGAAGT TAAA CGTC GAAAATTAGTAGAAGCTAAT TTTC AGAAGAGAGCAGAGCTTC GAAA ACTTGCGA  
AGAG TTTA TCTGTTAGCGAGGAA GAAA GAGAA GAGCTCGGGAAGCTCTCAAT TAAA ATGAGAAGAGATAC  
TTCTCCTTCTCG TTTA CATAATAGATGCCTATTAACAGGCCGTCTCGT GGATACCTTAGAAA G CAAA CT  
ATCTCAAGAACAAAT TTTAGACAAATGGCTTCTATGGGAGAT ATCC CAGGCGTTGT GAAAGCAAGTTGGT  
AGGACTTGTGTTGAGCCCCTT GAAA GGGGCTTTT TTTA CTCGTC TTTACTGTTTCT GAAA GTTCCGGTA  
TATTC TTTACCT TTTC CCAGTTAGGC ATTC TTTC TTCCATACCATAATTC TTGGGGATCG ATCC CCT  
TTCAGGAGAGTG CAAA CATTCT TTTA AGAATGCGGTGAGCTGTACGATG GAAA TAGGACCGACATTAGTA  
CAGTC TTTATTTA AGTAGAACCACT TTTC TGTATCAATCGCAAC CAAA ATTC ATTGTATCTGGGAT GAAA  
TAA TTTC T GAGT CCTC TAAA GTATTC TG TAAA AGGAATTC TTTCG GAAT CTTGCTGTTCCATGGAACGATT  
ATCTTGTGTAGAAGAAGGAAGAGGAGGGA GAAT TAATAGGAAGATAATGGCAAAAATACCAAAAAAC ATT  
CTGCCAAAACCAGCCTATTAGATTGCGATTTT TTTATTAGCTAGGTACGCCGTAAGC ATTC CCAGAC  
AGATGTACAG TAAA AAAAAGGT GAAT GGAAC ATTC CGGAGTTCATGGGAGGGCTGCCTAAT TTTA AGTT  
CGTTG TAAA TAATCACATTATTTCTTAGAGCAGCT TTTC TCGT TAAA AAAAAGATCATCATAGTACCTTT  
TTC TCGA GAAA CAAAACAATCAG GAAT TACT CAAA CTTAGGAT GAAGAACAACAAGGAAG ATTC CAGAG  
GCAATGCCAAA GAAA AAAGTAAGGAAGAACCAGCGGACAGGACGGCGATGCTTCT TTTAGCCAGTAAGT  
ATCC TAAGC ATCC AGGAAT GATGCCTCCTAGAGAAT CTCCTAGCTTGATGCTGACTAGTGTCAAACCAT  
CATTAGCAAGCAGA TAAA ACAGCTCAGTATATCTATACGATATTGCCTAT ATTC TATA CAAAATTCAT  
AAA AAATAATGGGT TCGC TTTC GTT CAAAAAAAACAATATTAAC GAGTAGATGATTTCTTTCTAAA  
AGCTCCTGTCTACAAGTTAGGGAGCGTT TTTAGAAA GAGAGCAGC CAAA ATCTGTTATTGACTTAGATT  
GCAGTAACT TTTA CCC TCGTCTCCAGTAACT TTTC TTGG TAAAAAAAAGCT CAAAAA GTGTTGCTGT TAA  
AAATTT CAAAGCATA GAAATAGAGCT GAATAGAAGAGACAAGATCACGAGAAT GAGGCAGCCGAGGAT  
GGAT AAGCAAAGAT TAAA ATTAGATG TAAAAGAGATT GAATTC CCA GAAACAGTC TTTAGTCGCGATATA  
GAGACCCGTGTGATTC AAGTGATC ATTC TTCACTGCTTAGCAAAAATCGATGGG TTTCATTATTAGGCG  
GGAATCTCATTGACACGCTT CAAA GACGCGATATC GAAAGAAT GAAA GGGATCTATGTTGAGCAGGATAG  
CAAGAATTC CAAA GTAAA GGTTC GAGTTGAAGT GAAT GTGGACTACG GAGTTTC TATCCCT GAAA AAACA  
GAAGAAA TCCAAGGCTGTATTGTATCC GAAA TCTCC GAATATACG GGATGTCATGTTGCTGCGGTTTCATG  
TTGTCGTCAAAGGAT TAACGC ATCC AAAAGCCAAAGGAT GAAGAAGTTCTGCTATTTGAAGTTATTGAAGA  
ACCTTG TTTAGAG GAAT TGCCCTTCGGCAGAA GAAT ACTTAGAAGAAG TTTC TGTGATTC AAATGAA GAA  
TAAA AGGCTCTGTATAGAGCCTTTT CAAA GTTAGGATCCTCGGTATGTTATTTCGGG CAAA GCGCCTTCT  
TCCT GGATCCGTT GAAT GTCT CAAA CTGTGATTC CCTGTACGGTT TTTA ACTC TTCTCCGAAGCGATGA  
ACACACG TTTC CAGCT TTTAAA CT CAAA AAGTAGACGT CAAA TTTC ACTTCACCGATTCCAG GGAT TTT  
T CAAA TAGTTAGCACTGCT CAAA CATGTT TTTA CGATAGTGTT GAAT CGC GAAA CCGTGGGCTTCATCT

CGTAATAGCTGAAAGAACTGAAGAATGCGGATGTGGATGAAGAAAGGATTCCTTGGGGGAAAGTTTCAC  
AAAATAGCTTTTCTTGGCGCAAGCTCAAACTGTGATTGCCAGATTCCTTGGCGATGGTTACTACGGTAAT  
CCCTGTAAATTCAGCTCCTCTAAAATGCGTTGCGCTCGTTTAAAATTGATTACGTCCACCATCGATTACT  
ATTAAGCAAGGAGTCTGTAGTAAGGGATCGGAAACGTCTGTGTTAAGACCTCTTCAAAGCAGCCAAGT  
CATCGCCATGAGAAGTAATAGAGAAGGTGCGATATTGCAAGGAGAGAAGAGATCATTTTCGAAAACAAT  
GCACACACCGACATTATGCTCACCTTGTAAAGTGTGCATTGTGCATAGCACTCAATGCGATATGGATACTGG  
CTTAAATTAAGAAAAGTGTGACAGCTCTTATAAGGAGGAGTGATAGAATTGAAAGGTTTCGCTTGTTCAG  
CAGCATTTTATGAGCAAGAGCAAGAAGCTCTTTTCGATTCGTGTTTCGGGCAGCGGATTCAAAAGCGG  
TTCAGCAGTGTATGATAGAGGGGAGCTCTGGACTGCTTAAAGATACAGGAACAAATATTTCCTTGGGG  
ATACGAGGATTTTCGATAATATTGCAAAATGAAAGAAATAAGGCAGAATCTTCTGAGCATTTT  
CTGGGAAGATAAAATAACGAGCGCCAAGTAGTTTCCTAGAACGAGGATAGTACAGAGACAATAGCGAG  
AGAACCCTTCTATAAAGGCCTAGTACATCGATATCATATGCTTGAATTTCTAACATGCTGTCAAAAC  
ATAGCAAAACGGATCAGGGTGAAGTGCATACAAAGCTGCGGCATGTTCAAACCTCAAAATCTTGAGAGG  
CTTTTTCATCGCTTTTCTAAGTTAGATATTGTGGAACGCACATCTCTTTAAGAAACAGAATGGCCAA  
ATCCAAAGTTTCTGTTATTCGCAAGAACATAATCTTACACAAGGAGCTAAGCATCTTTTCAATTTCA  
TAGAGGACGCAAGGACGTTGGCGAGTTCGAGAATTCGATCGGAGCATGTCCTCAAAGGGAACCAGAGGC  
TAATGACTTCTAGCAGGCATAGCAGGCTTACGACTGACATAAGGCCCAATTAACCACTGTTTTTTT  
ACCTGGGGAAAGAGCCCGTGTTCGTATAGCTTCAATTCATAGGCCAAGGATGTTCCAGGGATACAGATAGG  
CAGAAAATATGTTTATCGTCCAAAAGAAGGACGTTGTAGCGAGGCTGATATTTCAAAATTAAGTTGT  
CTAGGAAATGGCCCTGTTCACAAAAACAACATCGTGTCTATATCTGTAGTTTTTTTTCATTAATAA  
AGGGATGCGTTACGGGAATCGCTTTTCTCAAAAAGATATGAAAGAAAGTCGATTCGTAATTTTTCGCC  
TTACCTACGTAAAAGAACTGTTTCTTGGGAGTCTTTCTATTAGATAGACCCAGGAGAAGAAGAAAAGTCT  
TTAAAGAAAATCTCTATGCGCAGCAGAAAATCGTAAAACAAAAGAAATAAATGACCAGTTGTTG  
AGCTTTTTTCAGGCTCTGGGCGTAGATCTGGGCCCTTCAATTTGATGCAAGATCTGCTGTCTTGATACA  
ACGGAAAGAGGAAAACCTGCAAGCTTAGCGACATGAATGCCAAAACTTTTTTTCGAGTGCCCTTTTACGA  
TCTCGTACATGAAAATAGGTTGTCCGCTATTTTCTTAACCATAGCGTGAATAATTTTCTACATGCTGACA  
GTGCAATTTCTAATTCGGTAAGTTCCTTATAATGGGTAGCGAATAGTGTTCAAAATTTTTCATCTGTA  
AACAGAAGGAACCTTACTACAGCTTGGGCAATAGCAAGCCCATCATAAGTACTTGTCCCTCTACCGATTT  
CATCAAAGATAACCAATGATCTATCTGTTGCATTGTGCAAGGATACAAACCGTTTCGCCATCTCTACCAT  
AAAAGTAGACATCCCTTTAGAAAAGTTATCTCCAGCGCCAATACGTGTAAAATTTTATCTACTATACCA  
ATATGAGCAGAACGTGCCGGTATGAAAGATCCCAAAAAGCCATAATGACAAGGAGTGCAAACAAAAGCAA  
TATAGGTGGATTTCCAGCCATATTAGGCCCTGTGAGGAGGATCATTCGTGCAAGGCACTGTGCATCAC  
TGTGTCATTAGGAATAAAAGTCCCCTTATCTAGTAGGGTCAAGGCGACGGATGCATTCCCAAAATAATG  
GATAAAAGCATCGCTATGGTCAACGAGGGGGCGGATAATCATATTCGTCAGCTAGTTCTGCCAGAGATA  
CCACATAGTCTAAGTCTGCAACTGCAGTGAAAAGCAAAAGAATGAGATCTCGATGTTCTACGATATAAA  
ACAAAGCTCCTTAAAAGAGCTTGGTTTCTAAAAGCAAAAGTAGCTTATCTTCCACGCTAAAATCTTCTCC  
AATGTTGAAGTCTTGGCTAGTGAATCGTTCGATGTAGCCGTGATTGCCGACGGATAAAATTCCTTGG  
GAAGTTGGGGGGCTAGATTGCTAGCCACTTCAATGTAATATCCTAATGCCTGAGCATAACAGACCAAAAG  
TTTCTTAATGCCTGTTTCATTTCAATACGTTCTTGGTATTCAGGAATCCAGGATTTAGAATTTTCCAAA  
ATGTTTCTTAGTTCGTAGAAGATCTGGATGATAGTGGCAACGAAAATATTCCTTCCGACACTTTTAAAG  
GAAGTTCTTGGATAAGCTCTGTGATAACGTTTATAAGAGAGCATAGAGGGGGAGCAATCAAAAACCTT  
ATTCCTTAAAATTCGGGTAGAGCACAGTCAAACAAATGTCTGCAATGTGTGTACAAGAGAGCAGCGAG  
TCTCGAAGCGTTCCAATATCTTTTCGGAGTAGCCAGACTAGTTGAGATTTTAGTAGCTAGACGTTCTAAGT  
CTCGTACACAGGACAACGACGTTTAAAGATTTTTCGAAGATCTTCTGTGTAAAGAAAATTCCTACT  
GTCTGTCTAAGAGTGAATTTCTTTTAAATCATAGAAAAGGATGATTAAGGTAATTTCTTAAATAAAGC  
CCCATGTTGGGTGGAGGTTCCGTTCCATAACTTGAAGCAAAGATCCCTTTTCATGCTCACCATGAATAGGAG  
ACAGTAGTTCTAGACAAACAAAAGGAGCTTTATCAATAAGTAAATGTTTCTGTTGTCCAATAAATCAAG  
AATGGAGAGATGGGAAATAGGAAGAAGAAGCAAAATCCTGAATATAAGACAGTAATGCTCCGGCCGATTA  
ATAGCAGGGACTAGTCCCTGCAATCCAAAACCATCTAAAAGAGGAAACTTGAACACAGTATATAAATTTCC  
AAAATGTCAGACTGATCTCGAAAAGCCCAAGAAAAGTATTCCGGATAGTGTGATACGTAAAATGCTGTTGAG  
TTGTTTATAACAGCTGCATTTTCAAAATAAATCAAAAGTGGCTCAATAACTCTGTAGGAGCCAGCCGA  
CAGATCGCCTCAATAAGGTCCTTGGTATTATCGTATTCAGCAACAAGGAAAGTTCCCTATCGACAAGTCA  
AAAGCAGGAGAGACCATAGAGAGACCTACTTGATTGATTGCAAGGACATAGTTACAAACTTTTTTCGAGG



CAAAGAAGAGGATAA GAGT GCTCCAG GGGT TATCAATCGGTTGATTGTCCGAGGAACGAGGCC CAAA CTC  
CCTTCAGTATTATCGGCCTGCTCAGCAATGGCTACCT TAAA ACCGCGGCTTACTAGACGGTCCACAT ATC  
CATCC AGACAAGTTGCTGGAT GCGGCTCATCGGCAC ATTC TGCTCTGTGT TAAA GTAATATCTAGATC  
AAA AGCTA GGAT CAAAGCATCGTCAAAAAATGCTTCA TAAA ACTC TCCAAGGC GAAA TAACAATAGACAA  
TCACCAGCTTGCTC CAAA CACTGATGCCATTGCTGCATCATTG GGGT TAG CAAA TGTGTCATAGC TTTAT  
CTAGTATTGCGTGATC GAAAAAATTT TTTATTC GTAGTAGGGGAACAGGCTCTTATGTATCAGAGAACCT  
TC GAAA CGC GAGT GTACAACGGTGT GAATT CAAA GG GAAT ACAAGAC CAAA GGAAGCAAAATTC TTAAG  
AGAAA AAG GAATCC ATCAGGGAGAAA GAAGCACAC ATTC CCAA GAAA ATTATAGTGC GTTACCATGGC GG  
ATCC TTTA TCGCCGAAGAGCGGGCATCGCGTG TAAA AAAATATTGTACGATGCTTAT ATTC AC GAAT AGT  
GGAT CATAAGAGAAGAGCAACAAG GAT TGGAGCTAGGCTAGTATGTATTACACAGAAGAGAGCTTAGA  
GACTC TAAA ACATAGTATTGATATTGTTAGCGT CAAA GGGGAAT ACGTACA TTTAAA GCGCAGCGGTGCA  
GATTACAAGGCTTGCTGTCTCT TTTT ATGATGAGAAA ACACCGTCA TTTATCGTGT ACCCACTAGAGGCC  
ACTACCATTGTTAT GGAT GTGGAGAGCATGGCGATGCCATTAAT TTTT TTAT GAAA CAGCAG GGATATTC  
TTTC TCTGAAGCGGTACT TTTT TTAGC GAAAAAG TTTT ATGTTGATCTTGTGTCAGAACTAGAGAGACC  
TCAGGGCAAGATTC TAAA GATAGTCTTCGGCGTATTAACAGAGAAGCT GAAA AGGTTT TTTT AATACTGTT  
TA TTACA CAAA CCGGAAGGGGAAGAGGC TTTA GCCTA TTTA TATAAGCGAGGGT TTTT TCCCGATACGAT  
AGATCGT TTTT CAGATTGGTTATGCTCCTGAGCAAAGATTATTTA TTC AAGCGATGGAAGAGCGCAATA TT  
TC TGTGAAGCAGCTA GAGTGGGCT GGGT ATCTCGC TAAAGACTGGTT CAAACAAA CTCAGAGAAT CATGT  
TCCCG ATTC AAGATGC TTTA AGGCTATACCATT GGAT TTTT TTCTCGGAGGTTCAAAGAAGGTGGGCGTGG  
TG GAAA ATATATTA ATTC CCGGAGACCAT TTTATTTAAA AAATCTC GGGT ATTATAC GGGT TACAAT TT  
TC TCGTAAGCGCATCGC TAAA GAGCGGAGAGT GAT TTTA GTTGAAGGTCAGGCAGATTG CAAA CAAATGA  
TTGAT CAAA GCTTCAACTGTAC CAAA GCTGCTCAAGGGACTTC TTTT ACAGAG ACTCATGTGCAT GAGTT  
AGT TAAA TTAGGAGTATCAAAGCTTA TTTA TTA CAAA ATGG GGAT GCTGCTGGA GAAA AAGCATCGTTA  
CGTGTGGGGAT CAAA TCAGGCTGCAGGGAT TACTGCTATAGTCTGTCCGCTCCTTCTGGGCAAGATC  
CGGATTC TTTTTTA ATGCAACGAGGGCCTGAAGAGT TACGAGAGCTTCTCGATAGAGGAGAGGATTATCT  
TTCT TTTT TAG CAAA GCATAAG ATTC ATTC TTATGAACAG TTTA CTC CAAGAGAAA AAGCTC GAGT AATC  
GAAGAGGTA ATTC AACAGGTGCGTTGTTGGGGAAGTCCATTACC ATTC ATGAGT ACTTGAGGCAGTTGG  
CTTC CAAA GTCAAGGTTCCAGAACCTGCTGT CAAA AGCTATC TTTT TTCCATTACGTCTGCTGCTGAAGA  
CAAAG GAAA AAGGTCTCCGCAAAGAACCTTCCTCAGAGT CTGAGCAAACCTTCTACAGAAG GAAA AATT  
TC AAAAAAATTTT TCCGAGGATGAT TTTA GAAGCTGACGTGATACGGTG CAAA TTA CAAA CTAAGCCC  
AAGAT GAG CAAA TCCCGCAACGG TAAAGCAGTATC TTTT TCCGGAAGAGT TTTT ATTGTGCAGAAT ATCG  
AGCTATA CAAA TTATGGCTAT GAAT CACTACAATGATCGGC AAACACTGCCCTCTATGGACGAGATGATG  
TC TTTA GTTGTGGTACTGAAGCAATG ACTC TTCTTGTGCCAGAC GGATGAAT ACCGAACCTATGAGAG  
ACATTGTTGTTCAATCG ATTC GAAA TTATTGGACAAACATTGGCGAGACA GAAA GCGTAAGCTATGTCA  
TCAGAC GGGTAAA GG TTTA GATTC TTTA CAAAGATGTTCTGTC TTTT CCGGAGAGAGTTAAGG TTTCT  
TTA G TTTT TTAATTATAAGAAT CTTAATCAAGT TTTA ACAATATTGCTTATTAG TTTT CAAA TTATAGA  
ATATTAGCTCGTTAGTTCTCAA TTTA TT GGGT TTTA TGAGAAGTCTTCACTT TTTA TTAACAGCA TTTAC  
TTTC TCCTTGT CAAA TGGAGCAGC CAAA ACCGCTTCATCTCCTAAGACATT GAGT CAAA TTGCTGCGGAA  
GCTGCTG GAGT GGGCGCTGCACGTCTTCTCTGTTGCTTCCCTACTAG ATTC TGCCCATGAAGTTGCTA  
AAAGTGCTGGGGT GGGT ACGGCTCTGCCTAT ATTC TAAATGAACTACAAA TTTA CAGAGCCAGGAATT  
AGAA GGGT TACTC GCTTCTCAA GAAA ATATTTA GTT GAG TTTT CAA GAGTCTATAGACTGGGAA TTTT TTC  
CCGGTTTT TTTA TTTA AGCAGCTATT CAAATTACATTGTGATAGCCTTGATCGCAA AATTC TTAT TTTA  
GTAGAAGAG GAGT TCTCTCATGAG ATTC TTGTTAGC TTTATTC TCACTGATACTAGTTCTTCTGCGACT  
GAGGC ATTC TCAACAGA GGAT AAGCAGTGTCAACAAGAAGCAGAGGAAGACTGTAGTCAGGTAGCGGACA  
CCTGCGTAT TTTA CAGCTATGCAGA GGG TTTA GAACACGCAAGGGACGAAGG GAAA CTC ACCTTAGTAGT  
ATTGTTAGATACTTCT GGGTATTC CTTCGAGACTC TTGCTTATGCAGCCCATGCTATG GAAA GTTCGTTG  
CT ATCC ACA CAAA CTGAT CAAA TGGTTC TTTT TAGGAGGGAAGCAGTCCACTGA TTTA TCC TCCGGTTC  
CAGATCC TATGGTTGGCGAGATAGCGTTGTTCTTAGAAGC TTTT TCAGATCAAACA TTTT CATCACAGCC  
TGTGATTGTTACCTTAGCTATTGGGGCTTCTTCTGCAGAGATCAT GGAT ATTACCAGATGCCGTCAA TA  
AA TCC TGAACAAA TT GAGTAGTTAAGTCCACC TTTATAAAAAAAGGCCTTCTCAAAT GAAA AGAGAAG  
GC TTTT TT CAAA TCTGGAA GAAA CTTGTT ATTC TTACAGAAC ATCC CAAGCATAGAAA CC GAAA CACT CA  
AAAGCTGCTATCAGCAGAGCAATACGTTGG TTTT GAGT GC TTTT ATCATCGCTAGCGACACGCACA GAGT  
CTAAA AAGAGT TCGGTGC CAAA TGCCAACTC TTTT AATAGATGTAAGTAGTC TTTT GAGCTTATTGG TAA

AGCAGTAGTTTCCTCTACAAAACGATCCAGAGCCTGCAAAAATAACAAATCTTCGGCAGATTGTAAGGAA  
AACATCTGCTCTGTAACGGAGAAAGGATAGTGAGGCAA GAATTTTCTTTAGCCTGTTGTGCGTTGCAGCAA  
TGGT TTTTCAGTATCTGAGTATTC TTCAGTTCTTGGATAGACTGAGCACCAAAAATGATAGT TAAAAGGATT  
TTTA GGCAGTTATCTGTAAGGACTGTTGCTATAATCTCTTTA TCAAATCC TAGTGA GGAT AAGATCGTT  
CTCAACCGTCCCCAAACAAATGTATTGAGCAAACTTAAGACTTCTTCTGGAGACCATACTGTATTAGGAA  
TAGAGCTCGGGAAGTGTC GAATAAGCCGTGCAAA TAAATCTTCTATATCTACAGAGC CAAAAGT GGTGTA  
GAGAA GAGTAAGGATTTTC CAAAGACTGGCGTCGTAGGGCATAA GGATCATGAGAGGAGGTGGGGAGAAGC  
CCTA GAATGAAGCAAGAGAGCAGGTTATCTATTC TATC TAAAATACTTAATAAA GCCCCTGTAGTGGAGA  
TGTTGGAACC TAAA GTAATGTGTTGCAGATGTTCTCCAATAGCTAATGCAGCTGCTCG GGATAGAGAAGC  
AT CAAA TAAGTAATATCTTCCCATAATTC CCTGTAGTTCTGGGAATTC ATTGACAACCGAAGATACAAGA  
TCTGC CAAA CAGTAATGTATAGCGGTATCAATATCC TC TTTA GCGCATAAGGGGAG GAGTGCATAAGCCT  
CTTCTAAGTGTAACTTCAAACGAGAAGT TTTATCCGC TAAACTACCTAAGGATTC AAAATAGGTGACAGA  
TTTAAG TTTCTCTAC GAATGAGGAAA GAGGGGT AAGCAAATCTTG CAAAATAAGAAA TTC CCATCC GTA  
AGTCGTGGAGC TAAA GCTTT TTTTCATTGCCCTCAACGATACTGTCTGTAGGAGAAT TATCACACAGGATTA  
AGAATCGATTGGTGA TTTCTCCTTGCATAT CAAA GTTGGGAAGTACCGTTGATGCT GAATCATTTTC AGC  
TATTAGTAGTTC TTTAGGAAGAGAACAAAAGCT GGGTCAAATGCGCACTAATAACAAAC GGATGCTCT  
GTAAGGAAGACTG TTTCTGTAACAAGGTGTT CAGGAGCAATCGCCACGA CAAAATCC CCTGTCAAATTTCT  
GCAGCCCTTG TTTAATGATTGCCCGACGTTCTT CAAA TGACACGATAACACAAGCAC TACGCAACGTATC  
GACATACATGTTGCT GGATGGGAT CGTCAATTGACGATTGTCCAGCTGACGATGTCCCCAAGAAGTATTG  
CCTGATGATAC GAATCC TAAA GATATAGGGAGAA CAAAATCC CCATATAGCGCAACCAACCAGC GAATAG  
GGCGAGCAT ATTC CACGCCACCATT ATCC CAGGTCATTT CAAA GGG GAAAC GGATGGATCGAAT CAATTG  
AGGGAGCTCATTAACAA GAATAGCTGCAG TTTCCAAA CGTTCTTCTG GAATAACAA GAAATAGGTAATCG  
GTACCATTGATAGAACGAACACGACAAATCGCAGAAGGTTG ATCC AAAGCACTTCGGTGAGAGATCGATA  
ATCC ATGTGAGGGGAA GAAT TGTTCCTTGAGGAGACACGGAGCCATCTGTCA TAAA TAATAAG GAAAG  
AGGGGGCCCTTT TTTCTCAGATTC CGGAC GAATCGTTACATGACTAAGACCTTCTATGCACAATGCCAAT  
CGTCGTG GAGTGCCTAATACTTCGAGATG CAAA TAAGCAATGCCATGGTTCGGCAAG GAGTTTCCAAA CGA  
GCG ATTCGAGTTGTT GAATTC CAGTAGGGACAAAGGTCGCTGGCA ACTCCTCGCTTCCAATTTTC GAGCAG  
AAA GTCTTCTGGCTGGCAAATGTTG GGATTTTCCAAA GTGTTACTGTTGGTGTGGAAGGAG GAGTTTTA  
AGGAGAG GAAACCC TAATGACTC CCGCCATGCCACATACTTATCTGCAGCAGCTCGTGCTAGTTGCCGTA  
TCTTGCAATATACCGCTGCGTTCTGTCCAGAAA TT ACCCCTCGG GAATCTAGCATAT TAAA GGCATG  
GGAAGC CAAAATGAC GAAATCATATGCTGGGAGAGGGAGGCCCTTGGTCTAGAGT TGCCAACGCTTCTGCA  
GAGAAGTCATCAAAATGTT TTTA ACCACATGGTAGTGTGGCAGTCTCAAATTTGTATTGGCTCCAGGCCCT  
GTTCTGCATACTGTGTGATGTCTCCATAAGTAAGAGAACC ATTC CACATCACATCGTAGACG GAGTTCTT  
TTTC TGAAGATACATAGC ATTC GCTCAACACCATAAGTAA TTTTC GCCGCTAATTGCATC TAAA GG TTTA  
CTTCTACAGCTTGAAGTAGGTCAGTTGTGTA TTTTC CATACCA TTTAACCATACTTCCCAGCCTAGCC  
CCCAAGCTCCAATAGTAGGAT TTTCCAGTCATCGTGAAC GAAA CGGATGTCATGATCTAC TAAATTTAA  
TCC GATGAC CAAAAGAGATTC TAAG TAAAGG GAAAGAAAAT TTTTC AGGGACAGG CAAAAGGATCACCTGT  
AACTGGTGGTACT CAAA TAATCGATTAGGGT GTTGTCCATAACGACCGTCTTGGCGGGCCGAGAAGGTT  
CGATATAAGCTGTT C TAAAAGGTTCCGGGGCC TAAA GATTGCA GAAA GTTGCT GGGT TAAAATGTCCCGGC  
TCCAAC TTTCAA TCATATCC TTGAT GAATGATGCAGCCTTGTTCGCTCCAAAAG TTTAGAATAGCTGCC  
ATCATGGCTTGAA GAGT TAAAAGGTTGTGAGGACA TAAA ACTC CTAGATATCTGAGAAAAGAAGAGCCT  
TACGGACACGGAATACGGCTT GAAA TAGGAGCCGGGCTCTGCAGAACAAGGAT TAA GAAATCC TTGATAT  
TCCTAGAGGAACATACTAGTGGAAGCTGTATTAAT TGAACAAGGCGA GAAATGCCCTG TTTA TAAGA GAA  
ATCGATATTGCAATAGAGAGAACTAGTGCTAAGTTT CAAAAAAG GGATTTAGAATGTATTTA TTC CAAA  
TATAGATGG GAAA GACTGGCGA TAAA TTTCTA GAAA TGCTAAGAAT GAGAGAACTAA GAAAGTGAGCAGTC  
ACGAGAG GGATT CAAA CCGTT TTTA CAGAGAGGAGGAGCCGGATAGATCATAACATGTGGTGCTGACTTT  
TTTCAA AAA GAAA ATATCTGGTGTGAAGCACTAGACTTGG GAATTC AAAAAAGA TTTCTTGGGGAACAGAT  
GAGAGT AAGCTTACCAAACCTTCTGACAGTT TTTCTGTCTATTTA TCACACCGATT TTTATGATTC TTTAC  
T TAAAAGGTCGGTGGTTC GGGTGTCTGCCGATTC CTGCCTTATGTTCTCCTCTT CAAACTGATCATT  
CGGAAA TCACGGAT GCTGTAGAT GGATATATTGCGA GAAAGT TTTCCAGGTAACAGATCTGG GAAA ACT  
TCTAGATCCCATGGCTGATAGTGTATACCGTA TTTCTGCTGTACCTCACGTTACACA ACCCCCGGT GAAT  
CTTCTCTCATACTTGTG TTTA TTTCTTAGCTCGAGATTC CGTTATTAGCAC CAAA CGTACGCTGTGCG  
CTAGTAGGGGACAAGTATTAGCTGCTAGGATGAGT GGAAGT TAAA AGCTATTC TTTCAAGCTATTAGCTT

CTT**TTTC**ATCAT**TTTC**TCGATGTTCC**CAAAT**GC**AAAAGGC**ATTATCTCCACAGACGA**TTTAGAGT****TTTC**  
TCAACAGTGATAGTGTC**TTTAGTAGCCT****TTTATTC**TA**CAA**CTCTG**GAGTTGAGT**ATA**CAAAGGTGAATA**  
**AAAGT**CACTTATTACA**GAAAAATGACTCGCCGGATGGC****GAGT**CATAGGGAAG**TTTATTG****TTTATAAATTT**  
**CTAAA**T**TTTA**TTGGCGGCAG**TTTC**TAGGTCTGAA**GAAAA****TTTA**GACAAGCACGTACAATATGTTGCCA  
CTTGTCATGGTTGGTACGGTAGGTTGTC**ACTGCTTCCAAAAGCATG****TTTCGGAATTC**ATAGAAGTCATGC  
**GGAT****TAAA**GAAG**GAAA**ATCCATTG**GATTC**CA**CAA**CTACAGTATCTGCTAGTCCCTCCTGTAGCTCTTACTA  
ACGGTACAGTCCC**GTAA**CGC**ATTC**CAATCA**CAA**TGTGAGCCACATGGTTC**AAA**CATAGAAG**GAAT**GCA  
GATCATATCTGCAGCGGC**GAAAA****CAA**T**CGT**GCCAGCACATCACTATAAGT**CAAAA****GAATCC**TTACATTA  
GGG**GAATTC**CGTAATG**ATTC**TTGAAGA**CAA****CAA****ATTC**TT**CA**TGCAAT**TGATTC**CCGTAGCAGGTACCTA  
TAATAATGAGCGTGTAAAGCGT**TTTC**TAGTGCATGGAG**GAAT**GGCCTG**TTTC**CA**TAAA**GTGAGGACC**TTTC**TG  
CTCAGCA**ATTC**TA**GAAA**TAATGCACACGCAAGGAG**GAGT**GTT**CA****TAAA**GAGAGGCCTAAT**TTTC**GTACAAG  
GCTTT**TTTATTC**TCGGC**TTTA**GCTT**CAAAAAA**ATTGAAGGGGTCT**GAAA**AGCT**TTTAGTGTAGTT****TT**  
**TC**GC**TAAA**TTGG**GATCC****TTTC**AGGCC**CCAA**ATTGTCGTG**CGATTC****CATTC****AAA**ATCCCGCGGAGATG  
ATGTTGTCTAGCAGTAATGGCATCGT**GAATTTTC**GTAATCG**GAAT**AATCTT**CAA****GAA****TTTCCAAA**CGGTAT  
GTAGGA**GAA**ACCGTAGT**CAC****GAAA**TCTGAACAGTA**TAAA**GCTCCT**TTTAGCAACACACAAG****CAAA****TGGAT**  
CGC**GAAA**TAGTTGGTACTGGCTGATA**TAAAATTCATTC**CAAGAGGAGGCTTCTAATA**TTTC**TCGTGTTGT  
ATAGCCTCGATAACC**AAA**ATTATGTAG**GGG**TAA**GAACA**ATCT**CAA**TAATTGAGAGCAGGGCTGTTG**CAA**  
**AGT**AGTCCAGCAACTA**ATCC**TGTATGCCAATCGTG**TAAA**TGAACGATATTGGCTCCTTCTT**CAA****GATGT**  
AGGAGGCCGAGCAGCA**GAAA**AAGCGCA**AAA**ACGGAAGGCATCATCGCTTGTGTAGATTG**TTTC**CGC**ATT**  
**CTC****GAATAACTC**TGGCTGTGTGTC**GAG****CAAAA**AT**GAGTTAC****TTTAAATTC**CTTCA**TAAA**AGTAGG**GAAA**  
GCAGTTGCTTCTGCTCTCCAG**CAAAAAA**TAAGATAATT**CAAAA**ATCGAG**CAAA**AGATCTTGTTC**CAAG**  
GCAAAG**TAAA**TAA**TTTAGGGT****TAAA**GGGAT**TACC**ACTTCCGTTGTGTGATTAGCGGC**TAAA**GCT**CAAC**  
TAGTCCGTATAGCGCTCTCCAGGCCTCCGGC**CAA**ATTACCGGAG**CAAA****ATTC**GATAGCTGTGT**GAATA**  
AT**TTTC**ATTAGCAAGCT**TTTC**G**TTTC**GTTAAT**TAAATAAA**ACTCGTTAATTAT**TTTC**T**TTTA**CA**AAAA**ATA  
ATCAAGATGTT**CAAA**TTATAT**TTA**ATTACT**TTTATTTA**ATGGATAG**TTTC**TGCTCATAGAAGGTTGTTGT  
GGTGGTAAGATGCCCT**TAAATG****TAAA**AAAC**CAAA**ATT**CAAA**AG**AAATTC**TCTACCGATA**TAAA**AAGGTCT  
TGTGAGGTAC**ACTC**GGTCTCTTCCATTGGGGTGTGG**CAAG**CGGTAAAGGCAGCGGTT**CAAA**GTACCGCGC  
ATCGGAGGTT**CGAATCC**TTCC**ACCC**CAGAGTTGTCT**TTTATTC**CCCTTAGGCTGG**TTTA**ATGC**GAATC**  
TCTTATT**GAAT**AGGAGAGAT**TTTC**GATTGGGGCTATCTAAGGGAA**CAAG**AGGCTTGATAATAATCAGAGG  
CTGCAAGTACCATGGTAGGCCTTGTCTGGAGGG**GATTTTC**TT**CG**TATGTGCCAT**TTTA**AGGCCGTCTGGT  
ATAGCGGTAGGACCGTTC**ATCC**GGTTGAGG**GAAA**AGAAGCCCTAAGGCC**ATTC**CAAGGCCCT**TTTAG**CT  
CAAGGTAATGGAG**GAAT**AGCAT**TTTA**TGG**AACTC**GTAGTT**CAA**AGTCGTGAGACTGATAAGAAGTCTGTTA  
TTAA**GAAA****ATTC**GTCAGCAAGGTG**GAATTC**CTGCTGTCT**TTTATTC**CGGGG**GAAA**AAGCTTAGCTAATAT  
CGTTGTAGATGCGC**GAGT****TTTC**AGTAAG**TTTC****TTTC**TAC**CAAAGAAA**GCGGGC**TTTA**GCTTCTACTGTG  
TTCACGC**TTTC**TTATGAAGGACGA**GAA**T**CAA**AGC**TTTAGT**CAAAGAT**ATTC**AGTACCATGTAACGACTT  
ATGATGTA**ATTC**ATCTCGAT**CAAA**AGAATTAGT**GGAT**GGT**CGC**GACGTTCCGGT**GAAT**GTTCC**ATTC**G  
TTGCATCAACACGGTAGATTGTGTTGGG**TAAA**ATTAGGAGGAT**TTTA**AGACAAGT**GATTC**GTTGC**ATC**  
**CGAGT**TG**CAAA**TAAGCC**AAA**AGATATTGTTCCATT**CAA**AGAGT**GGAT**GTT**CAGT**CC**TTAG**GGC**TTTC**TC  
AA**ACCC****TAAA**ACTAT**CGGATA****CAA****TATTC**CTGAAG**GAAT**TAGACCTGTCACTTCTT**TAAA**GAAGTTGC  
TGTAACGGTAGCACGACGATAAGATTATCATGG**TAAA**GCTAGTTGTTGGCATAG**GAAATCC**TGGACGACA  
GTATGTCTGGACAAGGCATAACATAGGT**TTTC**T**CAA**TTGG**ACTC**GCTAGCATCACGTTTT**TTA**GGGGCT  
**TTTC**GTGAGGCCCCACGTC**TTTA**TGCTTCG**CAA**CGAAGGTAG**GAAATTC**CAAGCGAGGCAGTTGTTCTTA  
TGAAGCCCACTTATGTCAATCTTACTGG**TAAA**GCTGTCTTAGCTGCCAAGAAGTT**TTTC**GATG**TTTC**  
CATGGAAGAT**ATTC**TTGTTGTAGCAGACGACATCAATCGG**GAATTC**GGT**CAAA**TGCGT**TTTC**GGCAAGAT  
TGTGGCTCTGGTGGGCACAATG**GAAT**TAA**GAAT**ACCACGCAGAT**TC**TGCAAT**CC**AATCATTATTGGCAAC  
TACGCTTG**GGGT**AGGAAGGCCTTCGT**ATCC**TGGAGCTGAAG**GGGT**TGCTGATTATGTATTATCTAGTT**T**  
**TTCCAAA**AT**GAAA**AA**GAAAA**AT**TAAA**TGACTT**TTTAGAAA**AAG**GGAT**AGAAG**GAAA****TCC**TTCCCTGGCTA  
GGTTGTTAGTCTGACGG**GGATTTA**CTGTTCACTT**CAAAAA**AAAAGTTCC**TGAAA**AATAATCAG**TTTC**GA  
TAACATGGAAGCGCTTCTTATAG**GAGT**AGCTATCTCTAGTTATTGGAAGAAGCAAGGTCAATGCTTAG**GAG**  
**TT****TTTA**AT**GAAA**AAAAAACAGGCCAAC**TTTA**TGAGGGAGCCTATGTT**TTTA**GCGTGACGTTAAGTGAAG  
ACGCTAGACGTAAGGC**TTTAGAAA**AAGTTACTTCTG**GGAT**CACCAATTATGGTGGCGAAGTTCT**GAAA**AT  
**TC**ATGATCAGGGGCGCA**AAA**AGTTAGCTTACACA**ATTC**GTGGTGCTAGAGAAGGCTATTACTAC**TTTATT**  
**TATTTTC**ACAGTAGCCCCAGAAGCTATCGCAG**GAAT**TGTGGAGAG**GAGT**ATCA**TTTAAA**CGAAGATCTTCTTC

GATTCATGACTCTTAAAGCAAGCGCTGTGAAAGAAGTTTGAATTCGCTACATTGCCAGAATAATAGTT  
AAGGAGAACGTATGAATAGACCTGTTTATAATGAACACAGAAGGAAGCGTTTCGCTAAGAAATGTCCTCA  
AATTTCCGCGGGTTGGAAGACCATCGATTACAAGGACGTTACCCTCTAAAAGGTTTATTACGGAAGA  
GGAAAGATTC TTCCAAGAGGAT TACAGGGTTTC TTCTCGCTCCAAGCGCTGCTTGCTCAAGCTGTTA  
AGAGAGCTCGACATGTAGGGCTCAAACTTTCTGAGGAGAAGATTAACCTAAAAGAAATAACGGATG  
AAACACAATTACTTTATTAGAGGATGTCGATGGCTTAGGGCGTTCCGGCGATCTTGTGTGCTAAGC  
CCGGATACGTTAGAACTACCTGCTCCC TAAAAGGAAGGCAGTGGTTGCTAGCGCTGGAATCTCCGCAA  
ACAAGCAAAGTTGCAAGAGCAGCGCAAACTGCAAGCTGCGGCCGATAAAGAAAGAGTCTCTTCGCAAGCA  
GAGATGCTTAGAAGCATCGTCAAAAGATTTCCAAGTTCGTGTAGATTC TGAGAATAATATGTACGGTTCCG  
TAACCGTGAATGATATGATTAGTGCTGCTGAGCAACAAGGTGTTGTTCTTACACGTAA GAATTTCCCTCG  
CTCTCATAGCGGTATTAAGAATCTCGGAAGACACGTAGTTGGACTGAAAT TAAAAGAAGGCGTGACTGCG  
GATCTTCAAAAAGAGTTCGTGCTGATCACGAAATCATTGAACAAAAAGAATCTCAAAGCGCAGAAGAAC  
AAGAAGGT TAAACTTCAAACAAATTGGGGAAAGAGATTC TTTTC TTCCACCTCTTTTTTTTATTT TTT  
AATTATGCAC TTTCTTTC TCCAGCAAAGCTTAATCTCTTCAAAAGATACTTGGCAGGCGGGAAGATGAT  
TTTCATGAAATAGTCACACGCTATCAAGCGATAGCCCAAAGGGATCAACTCTCCTTATCAATAAGCTCTC  
GCGATTCCTCCAAGTAATTAATGCTTGTCTCTTGAACGCCTAGTAATTC TATATGAAAAGTGTGGC  
GCTTTTC CGTCGGTACACAGGCATTACAACGCCTGTTAGTTGGCGTGTAGTCAACAGATCCCTGTTGGA  
GCAGGCTTGCAGGAGGAGTAGTAATGCAGCAACTGCATTGCAAACTTTAAAACCAATCTTCAAAACAG  
GACTATCTGATGAGGAAATGCGTTCCTTAGCCGAACAGATTGGCATGGATACTCCTTT TTTCTTTCTAC  
AGGAGCAGCCTTAGGAGTGGCCCGTGGGAGAAAATAATAGCTCTAGAAGAGAGTGT TTTTCAGATAGATAT  
GTCAAA TATTTTTC TAGTGAAGGAGT TCTCACTAGTCGGGCTCAAA CCGTCGTACAACCTTCGGACTGTT  
CCTCCA GAAAAAATTTAGAGTATACGCAAATGACTTA GAAAAGCCTGTT TTTTCGGTTGCGCTTAGA CAA  
AAAAGAAAAGAAA CATTGGCTAGAAA GCCTGTGGGCGGAACCTTCTGTGCATATAGGGCTAACGGATCA  
GGGGCAACCTTACAAATCCGTTACCCAGAAA TCTTAGAGGAAG ACCCTTCTTATGCAGCTCAGATACAAA  
GAGCAGTAACGTTAAGCGGAGGAT TATTGACTTCTCCGATACGAAGAGATCC TACAGCTTGGTATAGCAT  
CTATTC TAAAAGTGCACCTGCAGCTACATAAGATACTCTGCAAGGAGCTTC TTTATCCGGAGCTTTAGAA  
ATAG TAAACTGTCTATTGGACTCAGAATCAAA GAAGCAGAAA GAATGCTTGATGACGCAGCAACAATC  
GATCCATCATAGAAGCAAGCTTATCATTATCGTTCTC TAAAGACAGCATAATTGTGTGTTGCATATTC  
GCTCCTTA TAAATCC TGCCTGTTGTATCCCTAGTACAAAATACTTGATTTTT TTTTCGATA GAAA AAAAC  
AGCTCTGCCCCCTACAGAGCCCT TTTAAAGGGGGACAAAATACTTCTT CAAATTAGCGGAACAAGCAAA  
ACAT TAAACGGTGGAACAGCTC TAAAGAGCCAAAATAT ACTCAGAGATACAAGAGAAGGTAACAATGCTGA  
TAAA AATAATTTAAT TAAAGAGATGTCA GAGT GCGG GAAAGTTGGTGCAGAAAT AAGGTATCCACAATA  
TTGGGCATATTAGACAC TAAAGTGAGCCCTCCTGCAGACATACTCCAACCAAAACCAGG TAAAGATAAC  
AATCA CAAACCATAGG TAAATTGTGAACGATATGATTC ACCAGAGCATTGTCTAAGAAGATT GAAA ACAT  
ATATGAGGTCATCATATAGCC TAAATCTGACATGCCGTGCATGAGCTCAAGC ATCC ACCATTC CTGAAGT  
TCTCCAATATCACT ACTCCAACATAGAACAATCC TAC GAAACAGACT CAAACTGT CAAAATAAGGATGTT  
GG TAAA AAATCGT GAATCGCT GAAACCC TAAGTA GAAAATAAATAAAA AATCC TAAA AATAAGG GATGTC  
GCGGCTGAGAATCACACAACCAACAAGAACAACAT GAAT GAAAATAATCCACGAAGGAAGGCGATCATTC  
ATCATAGTTGTACTGGGATGGT TTTAGGGAACCT TTTAAATTC TTTTCGGAATAAA CAGAAA AAAATTG  
TTGTAGAAA CCAAGAA TAGCAAGAAT TAC TTTCAACAAAATGACTGATAATGAAGCTG CAAATCCATTT  
AATTTCTGGAAGAATAGTCAG TAAAGCTCTTGAA GAAAATGAAGAAGT TAAACCGCTGATC GAAA TATTG  
GAAAATAAATAATCC CATAGTTGCATAGCAAACTTGGGAGAAGGAGA GAACAAATAAAA ACTGTTTAGACA  
ATAGTGTAGCTGCAATAATCATCGCTCC GGATTC TTTAAGGAAA AAAGCGGATAGCGGTGCTGCAATCAT  
AATAGTCCACCACCAACAATGGG GGATGTTTC CTTATT CAAACGATCGTTGCAAAG ACTCTCTGAGAA  
AAGTATTCGATAGGTCGCGATTC AAGGAGAATCAGCATAGCGATAA TAAAAGGGAGAAGACATAG TTTTC  
GGCTATC GAAATAGGCCATGGTTATGCGATAGCCTTCTGTATA TAAA AATAGACA GAATAGCG GAATCGC  
CCAAAGAACGAAGACCAGTTCAACGCGACTAACGATGCGCAGAAGCTCACTTAACCAAGGTACTGACGC  
CAGCGTTCCTG GAAA AATCATCTT TTTATGCTGAG ACTCTTCGTATAATCGTGTTAACCATGGTGTAAGAA  
AGGTAT GAATCACCAGCA GAAAAAATA GAATCGCTG ACCCGATGCGTAATCC TGAGAGTAATG GGGTAA  
AATCATAGAAA CTCAAGATAGAGGGCTATCGTC TTTATCACACTAGAGGGAGGCTTGTATT TAAAGG  
TAATAGCTAGCTCACTCCTAGCTCTCTATCACTA TTTTCGGATGCACA TAAA GAAGCAAGAGGTT TTTCTC  
GGAT GAAGAACCTCTTATCCGAGAAA ATGTAAGTACAAGAAT GTTATT TTTCTGCGACGAGTTGGCTC  
CATAGACGAGGAGT TGGATTTCT TGGCCAAACT CAAACTCAAAAATTCTTACAGTACTT CAAAAATA

GCTGTAATCCATAGAACGGGCAGCAGCTATTTCAAAGTCTGGGCGAGAAAAATCCTGTTTTTTTCGTTTCA  
AAAGCTATAGAGAATAAATTTTTCGCCATAGCTAAAGGTGTGGAACCTGGAAGCAATATGGACTGGATAT  
ATGTTTCTCGAAGCTGTTCAAAGATCTCTTCGGACAAGCCTGCAGATTTCTGGATCAGTAGCAATCTCAA  
TATAAAGAGTTGTGTTCTATGCACAAGCTCCTCAGGAGAATAGTTATTGGATCGAATATAGAAAAGTCCA  
CAAGGAGTTTCTGCGAATTCAGATATTTGAACCTACCATATACCCAAAGTTGTTGCTCTGTACGTAAAT  
CAGAGAAGTACAAGTTATGGATCCAAAGATAACAACATACTAGTAGCTACAGAGTCTTATATTGATGGG  
ATCTTCGTCAAATTCGAGCAGCAGCATACTTTCAGAGAGAAGGATATTGGAACGAAAGCCTAAATAGAA  
GAGAGAGGTTTTCCAAAGGATAATAGCTAGGAGCAGCATAAGGAGACGAAGCTTCTGCAAAGTTAGAGA  
GAGTCGATAATAAATTTGGAGAGATCTTGAGCCGAGAGCGTTTCTTAGTGCATAAGATTCTACAGCTAGTTC  
TTGGAGTAGTTTATTCGTGAAGTTCGCAAATCTTTCGTAGGAGAGGGTGTTTAAAGTATTGAGCTTATCT  
TCTAAGGAAACGGTATCAACAAGAATCTGAGAGTATAGTTTATTGAGACCAGCTCTTATAGGGCAGGCAA  
TAAGATTCCTTCTGATATTGTTCTGATAGCTGATCAAATAATATAGAAACAGACTTTCCTCCACAGGAAG  
ATCTCGTAAAGAAGACAGTAAAGCATTGATAAGAACAGGAGAGGTCTCAGTATATCCATAAAGAGAAAGA  
TCAAATCTCTGTGCTCCAGGAGATACTGCAAAAAGTCAATTCAGCTTTTAAAGCATCGTCATAACGTTTTA  
TTAATGTTTCATTAGCTAGTAGACTATATAGGCTCTGTAATACTAAAGAACGCACATCTGTTCTGTTGAAC  
AAAAGGAGAACGGATGCGCAATCTCATAGCTATTTTAGGAATCGTATAGAAAGAGTCTTACACAAGTATAT  
AAAGTGATCGCATCAAATCATAGGTCAGCTGCGGAGAAAAAGCAAACCCCTTCGTGTTGTTTCTCAAAG  
ATAATAATTGGACTGCAAAGGAAATAAATTTATTGGACAAAGAAAAGCAAATCCTAAGGAGGAGGAGTC  
CTGTATAGGTGTGAAATCTAAGGGTTTTCATAGAAAAGTGTCTGCAAGATGGGATCATAGAATTCATCT  
GCATTCCTCCAAGAATCTCGGTAGGGTAGCAGATAAGATATAACGTGCCTGTTGAGGGTCTGCTAAATAATG  
TAGCAAAGGCAAATTCATCTTCTTGGGAGTATTCGGATAGACAAGAGAGCGATAAGGGTATGTTGCTAA  
TGGTTCAGAAGTAAATTTGGGGACCATTCGTGATAGTGTGCGAAGTAATCTCGCAAAGCTGCTGTAAGTA  
TATTCTAAAGAGTTGATTTTCTGTATCTCTGGCAAGGAGTAGGCAGGAAGTCGTTTATGACGAACATAAT  
CAAGAAAAGCAAAGTTAGCTGCAAAAATCTCAAATATTTCCGCTTCCCCCTTATTGGTGGTTTTATAAAG  
AATTTCAAATCTTGTGATTATGAGAAGTGCTGTAAAGTTCTGCTTCCATCTCAGTAATGAGCTGTTCT  
TTCAAAGTAAAGCAACAAGACTATTTTCTTTTCTACTAGATAAAATAGAAATCAGTGACTGAGCCCATC  
CTTGTAAGGACTGTGGAGCATCAATAAATGCCAGTAAATAGCTAGTTGTGGAGAAGGTTTCGACAGCCTT  
ATTGATGAACAGTTTATTAAAGAGCAGTAGTATCTTGTGTCCAAAGAAAAGCGTTCAAATGGTGTGTACTGT  
GCAGATATAGGGATTTTCAGAGAATAGGGACGCGATATACGGCACTGCGGTGTTCAACGGAGCTGTAGTGT  
AAAATTTGCTGCCATATTTTCTGGAGAGTAGTGGTGGCAAACCATGCAAACATATCTTGAGTAGTGAC  
GGAGTTGAGGGTAGAGAGATTGCCGAGCCAAAGCGTTTAAATGGGTGATTTTTAGGAGCTATAAGTTGT  
TGAATACGATGCATACGACGAGAATCTTTAGTTGGATGCATCGCAAATCTTGTCTCAACAGCATGAACTT  
CAAATTTAAATCTTCTTGGCGAAGAGAGGTTGATAAAGAGATGTACAAACTGATCCAGAGCATTATC  
TAAATCTGCATTGTTACGGAGAATAGGAAGCAGGTTTATCTGGTAAGTAAATGCGTTATAGATACCC  
CCATGTGTGCTTAGGAAGGCAGGAAATCTCTGAGGGCTCGGGATATTTTTCATTCCTCGAGGAACACAGT  
GTTCTGTAAATGGGCTAAGCCTGGGAATTCGACAGGATCTGCATTAATTCCTGTCAAACAACAAAAGC  
GGCTCCGACTCAGCAGCATGAGGGGAGGATACAATCATGAGAGAGAGTCCGTTAGGGCATAGAATTTTA  
GCAATTTCAAATCTGCTAATGCAGGGTCAAATAGTCAAAGGGTTTTCATCTCGAATCGCAAAAAAGG  
ATTCGAGCAAGCAGTTAGAAAAGAAGGAATGCAAAGAAGTAATAGGGATAGGGAACGTTTATATTCAA  
AGGGTCATTGGTAAAGGTCATTGATAACAGGAAGGTGTTGTCCAATTTATTTCCGCAACCACCAGGTTGAGG  
CTTTTATCAAAGGCCAGGGTTCGTCAAGTTAATAATTTCCAAATAGAGATCGGTCACGATAGAGAAGG  
CACGAGAGGCTCTTAAAGCACGTAGGGCGTGTTATCATATATATCCGCTTCTTCGGAAGAACAAGCTC  
ATCGAGCAACAGTTCTGCTCCAAAGTTAAAGCAACGGGGCAAATGAGATCACGCGATGTTCTCCGATC  
GCTTCTCTATTGTGCGAGGCGGAGGAAGAATATCATAGGTTTTCATTGCTAAAGGGAAAGAAATGAGTCG  
TTTTCCTCGGAGCTCAAAGCAAGGAGCGGAACATCTTACTACTGTCAGGATGAAATTTCTGCAGGGTACAA  
TTCCTCTTGAAGATTTTACGATCTCTTCTCCGGAAGGAGCAACAATAAAGAAATTTCCCTCTTCGCTA  
AGAAGCATTTTTAAATGTTCTCATGCTTTCAAAGTTATGCATGAGCTTTCTTCTTTTCAGTTCTGGAGGGT  
GATTGATGTGTCTTCAAATAAATAACACAGAAGATCGCATCCCATGCTAAAGAGTCCGCTAGAGGATC  
TGAAGTATCCGATCCCTGCAACAAAGATCATGCTTTTCATGAGTGTGGATGGGAGGCTCCGAGTAAG  
CAGTACATGAGCTGGGGTCTGATTCGTCTGGTGGTTAGCTAACAGCACCAGTTGTGTCCAGCTTGG  
TATATTCCTGAATCTGATCCAATCGCTCAGGATGTAGAACAAATGATTCAAAGTCTGCTAATCAGCGCAG  
AAAAAAGTGCATGCCAAATTTGTAAGATCAATTTGGCAGCGAATTTTCAAATGGTAGGGAGGAAATA  
ATAGGATTCCTAAGGTCATCAATAATGACCTTAAAGCCATTGAGAACAAGAGCTTCCGCTTTCCTCAGCGG

AGCATTTTTATGATGCAGCCTCGATGTAGGCAAAATAGCAAACAAAAACTCAAA GTACAAAGGCTCTGG  
TAAAAGCTGATCTTCAAAGCCTGATA TAAACAGCAAAAAAATGCATCAACACACCTATTTA TAACTCA  
ATTCTTCTCCTGTAATCAATGAGAAA AATTGGTAGTGGTTAAGATGGATAGAATCGGACGTATTGCAA  
ATAGCTTAGCTTTCAATTGCTTAGCCAAGCGAATGAGTTCGACATCGTCCTGCTCTTGTTTCATATAGTG  
GGCGATTTCCGGATGAACGACCAAAACACAAGTTCGTGTGCTCCAAA TGTTTAATAATTTTCTTCAGGTCA  
CGCTCAA TTTCTATGAGGATAC TTTCAAGAGTCAAAATGATCGCGTTCCTTACAATATGGACAGGTGG  
TAAA TAGGGTCTGCATTAGTGA CTACGA TTTCTCTGGC GAGTCA TTTCTACTAGCCCAAATTCATCAT  
GCTCAAGATTGTACAGCGCGCAGCATCATATTTCA TGTGCTCTTTAATCTTTCCAAAACACGACGCTGA  
TTCTTGGCGTGA TTTCAATATCGA TAAAATCTATGATCACAAGTCCGCCAATA TTTCTTAGACGCAGTTGTC  
TAGCAA TTTCTTCTGCGGCTTCTAAGTTAA CAAACACTA GAGTCTCTTCGACTCAT TTTCCAGCTGTGT  
GCTACGTCCAGAGTTCACATCGATCGTGTGCATAGCTTCTGTCAA TCAAAGAAGAGATATCC TCCGCTA  
GACAGCCAGATT TTTCTCTTGGTAGCGGATCGA TTTCTTTCTCAATAT TAAAGCGTTCGAACATTGGAA  
CCGAATCGCGATAATACTCAATCTTTA CCGTCTGTCTGGAGAATA TTTACCCCAATAAGCG CAAACATT  
AAAATAGGTCGCGTAATCGTCTATTAACAAACGCTTGTAGCTCTTATCTACACAAGTCATCACAGCTTTT  
TTCA GAATATCTGTCTTCTCGTAGAGAAGAGAA GGATGATCTGGA GAATAAAATTTCTCTAGGATACCAA  
ACCAAGTATTTCAAGAGATCTTGAGCCTCGTTAATTAGAGTCTCTGTTGAAGCGGAGATACTCGCAGTCCG  
ACAGATAAGACCCATATCAAAGGGCA TTTCAAAAAGAGCGAATTAAC TG CAAAAGT TGAATCTCGCATCAGA  
GGGTCTTCAATCTTACGAGAAA CACCTCGGTGAGGG GAATTCGGTAGAAGGACTAAGTAGCGTCCAGGGA  
TTGAAA TATTAGAAGT GAGTCGAGCTCC TTTCTGCCCTATAGGTTCCCTTCACTACCTGAACAAGTACGGG  
ACTGTCAAG CAAAAGTAGCTCTTCTATAGGAGCTTCGGAGG TTTCTTCTGGCCGGGT TCTGCGTGATCT  
GCATCA GAATCTATATCGAACATCTGTTTGAATTT TTTAGAATTCCTAATACGTCCGAGATATGAATAA  
AGCCATTC TCCCGCTCATCTATGTTAAT GAAAAGCGGATTGAATG TTTCTG TAAAATGTTAGTTACGCGACC  
TCTATATATGTTCCCT TTTAACTGGC GAATTTTT TTTCTTTCAATGATCAAATCAAACAATTGGCCATTT  
TTTTAA TGC CGTAAC GAATCTCTTTA GACTCTATA TTTAGTAAGATATCGT TTTCCATGGCGTTCC TAA  
ATGCTCTGCGCTCTACAGGAGT CCTCACCTGATTCGAGGATGGG GAGTTAT TTTAAAATTTA TTAAGCA  
GAAGGC GGAT TATAAGTTCGATTAG TAAAAAATTC TACAAAAATGCTTGTGTTGAATAGTTTAA TTTAG  
AACTGACAAATTTCT TTTATTGTGAT TTTCTATAGTGACAAC TGCCA ACTCTTATTC TTGTTGGCAATCC  
GCTTTCTCTGTG TTTCTGTTGCTCAGCGACAGGAT AAGAAGGCTGTTCCCTTATGCTGCAAACACTTTT TTT  
AAAACCTTATTTCTATAACCCCTATT CAAATCTAGAAGCAACCTA CAAATTAGGGGAAGTATGGG GAAAA  
CCTCAA TATCGATAAGAGTTTC GCGGTAAGATA CAAAGAAGAAT TATAATTTA GAATGAAAGTTGAAA  
GACGCGGAAGGCTAATTGAGAAA AGACGATAACGT GAAATTTTA TCTTCATCGAT TAAAATTTCCAGGGG  
ATAGAGAAGATATTCATGCTTCGATCC CACCTCAGGTAT CAAACGATTCGGAAGAAGAGGGTATGTGTT  
CCCTGTG GAAATTCGGGGGAGTCTAGAAA TGGTAAGTGGAGAGCAGTGGTT CAAATCCTTAGAAATTTCT  
ACGATAC TTTCTCTTCGCTGTAGGACAAATGATGCTCTCTGTTGAATGGCCAGTACAGGGCCTGATTC  
AACAAATTAATTCATGTTTCAGATGAGAGATCGGGGGT CAAAATGCCGTGACAAA ATTCGGGATGAGTT  
ATTGTTAGAGGGGGATCGT TTTCAAGAGTGCCAGGAAGGAGGATGTCCTGCAAGAGAGTTTATCAA AAAC  
TTCAAAAAAAAAGGCGGGACGTA ACTCTTTA GAGAGA GAAAAAAAACCTTCGACTTCCCAAAAACCTTT  
TTCTCTAATATAC TTTCTGTGTTCCGGGAGAA GAATAGAGAGC GAGTCTTCTCTGGTATCGT TTTCACTG  
CGAAGAGAGGGGGTGTCCCTGTCTGTGCGGGTATAT CAAAGG GAGTCGTTCCACAAAATGCATCGCTTC  
AAAAATCC TGGGGATCC CAGACTTCCTTATTGGGGAGGGTAGCTATCTGCAGTCTATAGGAGAAGTTAG  
GAATGGCAGTACCACGTAATCGTCATAGCAATGCTA GAAAGAACATCCGCAGAAGTCACCATGCAAAGAA  
AGCATGTTCCGCTGCGGTGTGCAGTAATTGCAAGCAAGCTTTA TTTCTCATAACAG CAAATGCTTCTGT  
GGTT TTTA CAAAGGCAAAGCTGTTATTACGGTTGAGAAGTAATCCAGCACG TAAAAGAAATTCATGAAAG  
TGCGTCTAGGCGTAGATATGATGGGAGGAGATCATG ATCCTCTCGTTG CAAAAGGAAGCACTGGGAGAAGT  
TCTTC TTTCTGCAACAGGTGAACAGCCAGTAGAGT TCACTGT TTTCTGCTACGTC GGATGTTACCACCAA  
TTAAT GAATTC TCCGCTGTCTCGTTCGGTTC GGATCGTGACCCGAGAGGAT CAAATCTCTATGGAAGATT  
CCTTATTAGCTGCTGTTCCG TAAAAGCGGTCTCGATGGCTCTAGGAT TGGATGCATTGCAGCAAGGGGA  
TCTTGACGGT CAAATTTCTTTCAG GAAATACAGCAGC TTTAGTGACGCTTGTCTGTTCCAAAATACCTATG  
ATTC CGGCTGTTCTTAG ACCCGCATGTTGG TTTCTGTTCCGACTCTTTCTGGACAAA CGGTTAT TTTAG  
ATGTCGGAGCCACAGTGTCCGT GAATCC TGACGAGATGGTAGGT CAAACTCGTATGGG CAAAGCTTATCG  
GCAATCGTTGTCTCTAACAGTAACCAGCCG TTTACTCTTTGGGT TACTGAACATTGGTTT CAGAAGAACGC  
AAGGGAAC GGATTC TCA TAAAACAGACC TTTCTGTATGCTTCGGAACATC CAAAGTAGCGCTTT TTTAGGAA  
ACATA GAAAGTGGCGATGTC TTTA GCGCAAAGTAGACATTGTGGTTACAGAT GGGT TCACTGG GAATGT

CTT CAAAAAACGGCGGAAGGGT TATTC GATTTTC TACGACATATTC TCGGGGATCG CAAAGAAA AATCG  
ATTAAGATGCAG CAAA ATTACACAATCT ATCC TGGTTCTATTATCAGTGGCTTATCTAGACTAGTGAT TA  
AATGCCATGG TAAA TCTCATGGAACAGC CAAA TTCGGAG GAA TTC CGGGGCGATTGA TTTA GCACGAGC  
TAATG CAAATAGTCGTATTGCAGACAGG CAAAGTGATAACGTAG TTTA GCTTGATCACCTTTTC AGTGGC  
CTAA GGGTCTGTTC TTTATAAAA AAATC TTTCTCAAAAAGCAGTCAGCATTGTAC ATTC CACGGTCTAAGC  
TCTAATGTCGTCTCTGGAGCTTGTCTAT GGGT CGT CAAATC CAAAT GAAATCACAGGCAGAACGCGTTGT  
TGGACCGATTG TTTTC GGTACGCTAG CAAATCAAAAAAGTGCTA TTTTC GCAGG CAAAAAAT GAGT TCCGAG  
AAA GATA TAAA AAGCACCTGTTCTAAGT TTTCCAAA TCTGTAGTAGCAGCT ATCC TTGCCTCTGTTAGC G  
GGT TAGCTAGTTGCGTAGATCTTCATGCTGGAGGACAGTCTG TAAA TGAGCTGGTATATGTAGGCCCTCA  
AGCGGT TTTATTGTTAGACCAA ATTC GAGATCT ATTC GTTGGGT C TAAA GATAGTCAGGCTGAAGGACAG  
TATAGGTTAATTGTAGGAG ATCC AAGTTC TTTTC CAAGA GAAA GATGCAGATACTC TTCCC GGGAAGGTAG  
AGCAAAGTAC CAAA TTCTCAGTAACCA ATCCCGTGGT TTTTC CAAGGTGTGGACCAACA GGAT CAAGTCTC  
TTCCCAAG GGGT TAA CAAA TAGT TTTA CGAGCAGCAACCTTGATTTC TCCC CGTGACGGA GAAT CTTT TTTA  
GGTATTGCT CAAA TTGGGGAT AGTAGTAAGGCTG GAAT CACATTA ACTGACGT GAAA GCTTCCAAA TCTG  
GAGCGGC TTTA TATTC TACAGAAGATCTTATC CAAAAAAGATTAAG GGGTGGAT TGGAACAAA CATCATG  
TTCTTCTCTAGAACAGGGGGGAGCTTGTGCAGCTCAAAGTAT CAAA ATTCATGATTGTCAAGGAT TGCAG  
GT TAAA CACTGTACTACAGCCGT GAAT GCTGAG GGGT CTAGTGC GAAT GATCATCTT GGACAAA GAGGAG  
GCGC TTTCCAAA TTAC GGGT TCTC TTTTC TGGAGA GAAA AGTCTCTATATGCCTGCAGGAGATATGGTAGT  
TGC GAAT TGTGATGGGGCTATATCT CAAAAAGGAAA CAGCGCGAAC CAAA CTAATGGAGGAGCGATTGCT  
GCCTCTGG GAAA GTGCTT CAAA TCGCTAATGATAAAA AAGACTTCT TTTATAGAGAACCAGC CAAA TCTG  
GAGGAGCGATTGCAGCCTCTTCTGATATTGCC TTTTC AAAACTGCGCAGAACTAGT TTTTC AAAGGCAATTG  
TGCAATTGGAACAGA GGATAAAA GGTTCT TTTA GGTGGAGGGGCTATATCTTCTCTAGGCACCGTTCT CAAA  
CAAGG GAAT CACGGGATAACTTGTGATAAGAATGAGT CTGCTTCGCAAGGAGGCGCCATT CAAAG CAAAA  
ATTGTCAGAT TTTTC TGACAACGAGGGGCCAGTGGT TTTTC AGAGATAGTACAGCTTGCTTAGGAGGAGGCGC  
TATTGCAGCTCAAGAAA TTG TTTTC TATTCAGAACAATCAGGCTG GGAT TTTTC CTTTCGAGGGAGGTAAGGCT  
AG TTTTC GGAGGAGGTATTGCGTGTGGAT CTT TTTTC TTCCGCAGGCGGTGCTTCTGT TTTAGGGACTATTG  
ATAT TTTTC GAAGAA TTTA GGGCGGAT TTTTC GTTCTCTCGTACT TTTA TGTACGACCTCAGAT TTTA GGACAAT  
GGAGT ACCAGGGAGGAGGAGCTCTA CAAAGT GAAA ATATTTTC TC TTTTC TGAGAAT GCTGGTGTGCTCACC  
TTTAAA GACAACATTGTGAAGACT CAAACTTC GAAT GG GAAA ATTC TGGGAGGAGGAGCGATT TTTA GCTA  
CTGGTAAGGTG GAAA TTACCAATAATTC CGGAGGAA TTTTC TTTA CAG GAAA TCGGAGAGCTCCACAAGC  
TCTTCCA ACTC AAGAG GAGT TTTTC TTTA TTCAGCAAAAAGAAGGGCGACC ACTC TCTTCAGGATATTC T  
GGGGAGGAGCGAT TTTA GGAAGAGAAGTAGCT ATTC TC CACAACGCTGCAGTAGTA CAAA AGCAAATC  
G CAAA CAGTGCAGCGAAGAAGCGACATTATTAGGTTGTTGTGAGGAGGCGCTGTTTCATG GGATGGA  
TAGCACTTCGATTGTTGGCAACTC TTCAGTAAGA CAAA GTAATAATTACGCAATGGGACAAG GAGT CTCA  
GGAGGAGCTCT TTTA TC TAAA ACAGTGCAGTTAGCTG GAAATGGAAGCGTCGATT TTTCTC GAAA TATTG  
CTAG CAAA GGAGGAGGAGCTCTCAAGCTTCTGAAG GAAATTGTGAGCTAGTTGATAACGGCTATGTGCT  
ATTC AGAGATAATCGAGGGAGGG TTTA TGGGGGT GCTA TTTTC TTGCTTACGTGGAGATGTAGTCA TTTCT  
G GAAA CAAGGGT A GAGT T GAA TTTAAA GACAACATAGCAACACGTC TTTATGTGGAA GAAACTGTAGAAA  
AGGTGAAGAGGTAGAGCCAGCTCCTGAGCAAAAAGACAATAATGAGC TTTCTTTC TTAGG GAGTGTAGA  
ACAGAGT TTTA TACTGCAGCTAATCAAGCTCT TTTTC GCATCTGAAGATGG GGAT TTTA TCACCTGAGTCA  
TCCA TTTCTTCTGAAGA ACTG C GAAA AGAAGA GAGT GTGCTGGAGGAGCTATT CAAA CAAAAC GGGTTC  
GTATTGTAGATAACCAAGAGGCCGTTGT ATTC TC GAAT AACTTCTCTGATA TTTA TGGCGGCCATT TTT  
TACAGGTTCTCTTCGAGAAGAGGAT AAGTTAGATGGGCAAATCC CTGAAGTCTTGATCTCAGGCAATGCA  
GGGGAT GTTGT TTTTC CG GAAA TTC CTCGAAGCGTGATGAGCATCTTCTCATA CAGGTGGGGGAGCCA  
CAAA TACTCAAAA CAAA ACGAT TTTTC TCAGAATACAGG GAAT GTTCTGT TTTA TAACAACGTGGCCTGTTC  
GGGAGGAGCTGTTCTGATAGAGGAT CATGGTAATGTTCT TTTA GAAGCT CAAA GAGGAGATATTGTT TTT  
AAA G GAAA TTTCTTC TTTTC AGAGCACAA GGATCC GATGCTATCTAT CAAA CAGG TAAA GAAT CGCATATTA  
CAGCCCT GAAT GCTACGGAAGGACATGCTATTGT TTTTC CACGACGCATTAGTT CAAAAAATC TAAA AGA  
AAGGAAA TCTGCTGAAGTATTGTTAATCAATAGTCGA GAAA ATCC AGGTTACACT GGATCTATTC GATT T  
TTA GAAGCA GAAA G TAAA GTTCCCTCAATGTATTC ATGTACAACAAGGAAGCCTT GAGT TGC TAAA TGGAG  
CTACATTATGTAGTTATGGT TTTAAA CAAGATGCTGGAGCTAAGTTGGTATTGGCTGCT GGATC TAAA CT  
GAAGAT TTTA GATTC AGGA ACTC CTGTACAAGGGCATGCTATCAG TAAA CCTGAAGCA GAAA TC GAGT CA  
TCTTCTGAACCAGAG GGGTGCAC ATTC TC CAAAGAT TGCGAAGAAT GCTCAAACAACAGTTCTATGGTTG

ATATCCATACTA TTTC TGTAGA TTTA GCCTCCTTCTCTTCTAGTCAACAGGAGGGGACAGTAGAAGCTCC  
TCAGGTTATTGTTCTGGAGGAAGTTATGTTTCGATCTGGAGAGCTTAA CAAA GAGT TAGTTAACACAACA  
GGTACTGGTTAT GAAA ATCATGC CAAA TTGAA GAAT GAGGC TAAA GTTCCATTGATGTC TTTC GTTGCTT  
CTAGTGATGAAGCTTCAGCC GAAA TCAGTAACTTGTCGG TTTC TGA TTTACAGATTC ATGTAGCAACTCC  
AGAGATTGAAGAAGACACATACGGCCATATGGGAGATTGGTCTGAGGC TAAAA TTC AAGATGGA ACTCTT  
GTCATTAATTG GAATCC TACT GGAT ATCGATTAG ATCC TCAAAAAGCAGGGGC TTTA GTATTTA ATGCAT  
TATGGGAAGAAGGGGCTGTCTTGTCTGCTCT GAAA AATGCACGC CAAA CTCATAATCTCACTGCTCAGCG  
TATG GAATTC GATT ATTC TACAAATGTGTGG GGATTC GCC CAAA GTGG TTTC CGA ACTCTATCTGCAGAG  
AAT CTGGTTGCTATTGAT GGAT ACAAAGGAGCTTATGGTGGTGTCTCTGCTGGAGT CGATATTC AATTGA  
TGGAAGAT CAAA TTCTAG GAGT TAGTGGAGCTGC TTTC CTAGG TAAA AT GGAT AGTCAGAAG CAAA ATGC  
GGAGG TTTC TCGGAAGG GAGT TGTGGTCTGTATATACAGGAT TTTAGCTGGATCC TGGTTCTTCAA  
GGACAATATAGCCTTGGA GAAA CACAGAACGATAT GAAA ACGCGTTATG GAGT ACTAGGAGAGT C GAGTG  
CTTCTTGACATCTCGAG GAGT ACTGGCAGATGC TTTA GTT GAAT ACCGAAG TTTA GTTGGTCCGTGTGAG  
ACCTACTT TTTA TGC CAAA CATTTCA ATCC TTATGTCGAAGTATCTTATGCTTCTAT GAAATTC CCTGGC  
TTTA CAGAACAAGGAAGAGAAGCGGTTCT CAAA AAGACGCTTCCCTTACCAATATCACCATTCC TTTAG  
GGAT GAAG CAAA AAT TGGCGTTCA TAAA AGGACAGT TTTC AGAGGTGA ACTCCAAA GGAATAAGTTATGC  
ATGGGAAGCTTATC GAAA AGTAGAAGGAGGCGCGGTGCAGCT TTTA GAAGCT GGG CAAA ATTGGGAGGGA  
GCTCCAAT GGAT CTTCCTAGACAGGAGCTGCGTGTGCTCTG GAAA ATAATACG GAATGGAGTCTTACT  
TCAGCACAGTCTTA GGAT TAACAGCTT CAAA TGGAGGATTTA CTCTACAGATAG TAAA CTAGGATATGA  
GGC GAAT GCTGGAT TCGGATTGATCT TTTA AT GGAT TGGAAGAGCTAACAGCAACC ATTC TATCCCTAAT  
CTCCCATCAGAGATTAG GGAT TTTT TTTA TTAGCTAGTCAATAAGTTGAGGAGAAGATAGAATC TTTC TT  
TTTT TTTC GCTAG GAAA CAAA CAAA TGCAGAAA TAGGTCTGAGGCTGTTTT CAAA GTCCATCTGCATGA  
CGATCA TTTAAA GGAGATTC GATGACT ACTCTTCCCAATACTTGTACTTCAA ACTC CAATTC TATAAA TA  
CTTTAC GAAA GATATC GAAA TGGCAAAGCAGATCC AAGGCTCTCGGAAGGATCC TCTTGC TAAA ACCTC  
AT GGAT CGCAGGAT TGATCTGTGTTGTTGCTGGGGT ATTGGGACTTCTTGTATAG GAATAGGAGGATGT  
TCTATGGCTTCC GGAT TAGGAT TAATCGGTGCTATAATTGCTGCTGTCGTCGTAGCCGTCGG TTTA TGCT  
GCTTGGTATCAGC TTTA TGCTTGCAAGTTGA GAAA TCTCAATGGTGGCAGAAA GAG TTTA AGTCTT GGAT  
AGAGCAAAA ATCC CAG TTTAGAAT TGTAATGGCTGACATGCTCGAAGCAAATCAGAAA TTGCAATCAGAA  
GTG GAATTC CTTC AAAAGGTTGGAGCGATGCTGCCGAGTGCACAAGGAAGATGTGACGAAGTATGAGC  
AAGTTGTT GAAA AATATGGTGA GAAA ATTATGAAGCTATATAAGCAAACAGGTGTTCTTACCATA GAAA  
AGTCAATCTTCAGAAA GAGAAA AAAACTTGGCTGGAAGAGAAA GCT GAAATGGAGCAAAAATTAACAACC  
GTTAC GGAT CTGGAGGCAGCAAAAACAATTAGAAGA GAAA GTGACAGATCTAGAGT CAGAGAAA CAAG  
AGT TGCCTGAA GAAT TAGACAAAGCTACAGA GAAT CTGATGAGATGGCTCATGAAGCGATG GAATTC GA  
AAA GAAA AACATGGTATCAAACCAGGAAGACGTGGTTCGATATAGAAGAAGAC GAAT GTCTAATTC GTT  
GTTTT TTTA ATAGAAGCCTGGCCTGTAGTAATAAGACCAGGCTATTTTT CAAA GATTC GTTAATCTCGAC  
GAC TTTC ATCAATAATGGACT GAG TAAA GTCTT GAAT CTC CAAAGAAA TATTT TTTAGCCAGCAG CAAAGT  
CTGTTCTGCAA ATTC TCGTGTGTGGTGTAGAGT CAAAAGT AGGGCTCGGCC TTTC TTCGTGCC GGAT  
GTCTTGACGCGGAGAAGCTTT TTTC TGA CAAA CATCC CACT TTTA GGGAG GAAA AGACTAGTAAGTAGTG  
TAGCTAGGA ACCCTCC GAAT AGGACGCCCTCGCAACCATAAGCAACA TTTA TTTTT TTTAGGTT CAAA GCT  
TCTGAAC ATCCT TTTC TCCACAAAAGGTTAATCTTTT TTTC TTATCAAGAGCCATGCGCATAGGGCTA  
TAGCGGCAAG CAAA GCTCCACAAAAGTAGGCGGCTGCTGCAACTAT TTTCAGAGTCTTCATTATCC TCAAG  
TTCGTCGCTAGCTGAGACAT TTTC CGGTCGGCATACTTCTTGCCTAACC AATTTA GAATAAA TTT CAAA  
CCAATCAATAGAGGTGCAAGCCATCGAGCTTCGAAGTT GAATAGAGAA GAAA TTC GACTGACAAG TTTC A  
TAATCTTATGGAGCTT GAGCAGTAGGCAGATGG TAAA GGCAAAAATCAAGACC ATCC TAAAGAAA GCAG  
AAT GCAACAGGCAAC TAAA GCTTCTATCAAATAGG GGGTCA TAAA AACAAAAAAA TAAATCATTTAGTTT  
TCGATAATTAT TTTC TTACTTCTTA TTTAAAAAGT GAATGGCCG CAAA AATT CAAACAAAGTTATAAA TA  
GTAAGCTATTGAT ACCCAGATTGATG CAAAAGGAAA TGTCTTAAGAAGGCGAAT TGCAAAGAT CAAA ATA  
AA AATAGG GAATA TTTA TCTCT GAAA ATCAAGGAT CAGTTAGT CAAA AGCCAAA GGATATTC TTAGGGAT  
AGAGCAATGACACGTGATGTGAGCCAGCTA CAAA GAACTGACG GAGT GCGAGGACGGGCAAAC CAAA AGC  
CTATGACGGTG GAAA CTCTGTTCCTTGGTAAGGCCATTGCAG GGGTGTATTAGA GAAA CATGCCGG  
TAAGCATCGCGTAGTTGTTGG TAAA GAT ACCCGACTC TCTGGAT ATATG CAAAAAA ATGCTCTGATAGCA  
GGTCTTACTTCTATGG GGATAGAAA CCTGATGTTGGGACCT ATCC CT ACCCCAG GAGTGGCA TTTA TTA  
CTC GAGCTTATCGTGCAGATGCTG GGAT TATGA TTTC AGCATCGCACA ATCC TTATCGAGATAATGGAAT



TAAGATTTTC TCTTCGGATGGATTC AAAATTGGCCAGGCAGTGGAAAGAGCGTATCGAAGCCATGGTTGCT  
TCGAAA GATCAAA GAAA CTTCTGATGATCATGCTGTTGGTAAA AA TAAAC GAGTCAAAGATGCAACAG  
GAAGATATATTGAGTATGCGAAGGCTACCTTCCC GAAA GGGAGAACGT TAAAAGG CAAA CGTATTGT TTT  
AGATTGTGCTCATGGAGCCACTTATC GAGTAGCTCCTTCCGTA CAAA AAGAAT TAGACGCAGAAGTGATC  
TGTTATGGGTGTGAACCTTCGGATGTAATATCAATGCA GGGT GCGGAGCTTTA TGGCCTTCTACC ATTC  
AGAAA GCAGTTATTGAACACAAAGCAGATGTAG GAAT TGCATTAGATGGAGACGG GGATCGTCTGATCAT  
GGTTGATGAGAAGGGGCATATTGTAGATGGAGATATGCTGTAAAGCATCTGTGCAAGTGA TTTAAA ACGA  
CGACAGGCTCTACCTGATAATCGTGTAGTGGCAACAGTGATGACCAAT CAAA GTGATTGCGTTA TTTAG  
AAA GTCTGG GGATACAAGTTACAA TTTC TCTGTAGGAGATCGACATGTATTGCAGCATATGTTG GAAAA  
TCAAGCTGTGCTTGGAGGAGAACAAGCGGGCATATGATT TTTC TCGATTACAATACAACAGG GGATGGG  
ATCGTATCTGCTCTTCAAGTGTGCGTATTATGATC GAAA GT GAATCGACATT ATCC GATCTTACAGCAT  
GTATCG TAAAGAGT CCTCAAGCGCTAATCAATGTCCCTGTGAC GAAA AAGGTGCCCTTAGAGT CCTTAGC  
TAATGTACAAGGGGTGCTCAAAGAAG TAAAAGAGGTCTTGGGGGATTC TGGACGTAT CAAA TTAAGATAT  
TCTGGTACA GAAA ATA CAAA CAGAGT TATGGTCGAGGGGAC TAAA AAGCATCAAGTGGACTC CCTTGCTA  
AGACAATTGTTGATGTTGTAGAAGCC GAAATTGGAGCCGGGATTTCC GAATAAA AGGATCGATATGTGTG  
GGATA CAAAGATA TTTA GGAGAAA AGAACGCTGTACC TTTA GT CAAA GAAGGGT TGTCTGAACTCGAGTA  
TCGTGGTTATGACTCTGCAGGGATAGCAACTC TTATTGAAGGCCGCTTG CAAA TAGAGAAGGCTGTAGGG  
CCTGTAAGCCAGTTATGTTCTGCTG TTTCTTCTGAT ATCCATTC TCAGGCAGCTATAGGTCATACGCGAT  
GGGCTACACACGGAGAACCTTCCCCT TTTAATGCAC ATCC TCATATAGATAT GGATGCGAGT TGTGC CAA  
AGTGCATAATG GAAT TATTGAGAA TTTC CAAAA ACTCAAAGAAGAACTGGAAGAGCAGGGCGTAGTATTT  
TCATCAGATACCGATACAGAGGTTATCGTACAACCTT CAAA CAAGGCGTTACAAAGAGACAAGAGA TTTAA  
TTC AAAGTT TTTCTGTG ACTC TCAAACGCTTACAGGGGAGT CAAA CTTGTGCTCTCATGCACCAAGATCA  
TCC TGAAGT TTTA TTATGTGCTGCTCAT GAAA GTCTCTCATCC TAGGAT TAGGAGAAGACGAGGTT TTT  
ATTTCTTCTGAT ATCC ATGCTTT TTTAAA ATATTC TGGCTGTACACAAACCTTGGCTTCAGGAGA ACTAG  
CTGT TTTACGTATAGGGAAGTCTATCGAGACGTACAAT CAAAAGT TAGCGCGT ATCC AAAAGGAAGTGGC  
TTGCATAGACCATACAGAAGATTC CAAAGATAAAA AAAGGG CAAA ATTATTACATGCTCAAAGAGATCTAT  
GAGCAACCTGAAGTC CAAA AGCGTATCTTACATCTCACGTGTGAAGAGAACAGT TTTA CAGAAT CTTT TT  
TAAAAGGGTTCTC CAAA GACGAGATTCAGAGCTTGCATATTGTAGCTTGC GGCTCTTCTTATCATGCCGG  
CTAT TTTAGCCAAATATGTGATT GAAT CTATCGCTTCC ATTC CGGTGTATGTAGAAA TTGCTTCAGAGTTT  
CGTTATCGTCAGCCATATATAGCAGAGC ATTC GCTAGCT ATTC TCATCAGTCAGTCAGGAGAAA CGGCAG  
ATACGTTAGCCGCTCTTAATGAGT TCCGCAAGTTGAGCAAAGCACGTGTTCTCG GGACAAA TAATGTACG  
AGAGT CCGCTCTTGCTTCTC GAGT CGACCATTGTCTG TTTA TTGAGGCG GGAT TGAAGTGG GAGT CGCT  
TCTACAAAGGC ATTC ACAGCTCAGCTGTTGCTGTG ATTC T CAAA GG TTTAAGGCTAGCAAACCATCGCC  
AAGTCATTGCTCAGGAAGACTTAGCGCAAGCAATACAAGGTCT GAAA GACAAA CAAA CAAAACAAGACT  
TTTC TTAGATAGTTCT ATTC ATGACTGGCGTTGCCGACAAATTGAGGAGAC GAGT TTTATTTTC CTAGGG  
CGACGT TTTATGT ATCC AA CAAA CATGGAAGCAGC TTTAAAAT TAAA A GAAA TTGCTTACGTAGAAGCAA  
ATGCTT ACCC TGCAGGA GAAA TGAAGCATGGCCCTATTGCTCTTATTAGAGAGGGG ACTC CCGTGATTGT  
GTATTGTGGAGACCGCTCTGTATACAC TAAA ACTATAGGAGCGATCATGGAGGTGAAGGCTA GAAA GGCC  
TATGTGATCGCTCTTGCTCCG GAATCC AATCG GGAT ATCGCTGCTGTCTCCGACGAGCAGATCTAT ATCC  
CCGATAGCCACGACCTTGCTGCTCCTATCTT ATTC ACGATAGCAGGCCAGATCATGGCTTACACCATGGC  
TTTA CAGAGAGGAACCGAAGTAGATAGACCTCGGAAC TTGGC TAAA TCTGTTACTGTAGAG TAAA ATCTA  
CAGTTT TTTC TCTCTTGAT GAAT AGCATAAGCGTCTGTATCTTAGATG GAAT CGAGAAGTCGCAATCCA  
TGCGACTCTC TAAA AAAGGTATTC TCATGA TAAA CAAAATGTTGGGCGGAGCCTTGCTTGTGCGCAGGAAC  
AACCATTGGCGCCG GAGT ATTAGCCGTCCCCTG TTTC TACCTCAGAAGGG GGATTC CTGCCTACGACGTTA  
CTC TATATTGTTTC TTGGTTCATTGCTGTGGCTTCC GGGTATTGCTT CAAA GAAGTATTGACCTGGACAC  
ATTC CA GAAA GAATG TAAA ATATGGTCTCTATGGCA GAGTATAC TTTA GGCCATAAA AGCAAGATCATTAT  
GTGGTTGGTATACCTACTGCTCT TTTA TTCCCTCTTGGTGGCTTATT CAAA TGATGGTGG GAATATTC TC  
ATGC GAGT CATG GGAT GTGCGAGTTGGGATACTC CTT GGATTC GACATGCTATGCCTGTAGTATTT CAAA  
C CAAA TTTTC CCCATTATTAATGGC GAAA ACATCC ATTATCGATCAATGTAACAG GGGT TTTTC GTT CAAA G  
CTTAG GAAT CGC ATTC GCTATGT CAAA CTATTTCC G TTTCCCTCTTAT GAAA AC GGA CAAA TTAGTAAGA  
TCTGCTTGGGGAGCTAC TTTAAA AGGATTTCC CAT TTTATT CAAA GCA CAAA GATTTCC AAAACGTTGTTC  
CTACGTTGTATCACTACAT GGAT AAGAACG TAAA AGATGTGAAGAAGGCCATTGTTATTGGAAGTTCGAT  
TCC CAAA GTTCTGTACATCA CAAA GGAAGCCATTGTGTTAGGAGCCGTTCC TA TTTCTTTCT TTAGAACAA

GC GAAA GTAGAG GGAT GGACTGCTATTGGAGCATTACAAACAGC CAAAAAATGCGCGGCTT TTTA TGTTG  
CAGGG GAGT TTT CAAA GAT TTT CAAA CTTTAATTTT CTCA TTTA TTGGCGTCTC CAAA GG TTTAAA AGACTT  
T TTTA TAGATGCT TTTCAATGGGATGAGAAAAAGCG TAAAGTG GAAA TCTT TTTT TTAGTT CAAA TTTTC  
CC CAAA GTGTGGGCTGT TTTCTATCC AGGCATTGT CAAAAAATG CAAA GAGT GCACCGGCGC TTTA GGTG  
AGACGATAGT TTTA GGAG CAAA CCCCATTGATGGTATG GAAA GGGCGCTACG GAAAGAAA CGTTATTA  
CGG TAAA CGCATT TTTCTG GCGG GAAA GGGACTC TCTGGTTATGTCAGGGCTAGTGCTTCTTAACCTG  
GTGTTGATTGCCAGAAG TTTCTAGGCTATTAATTC CTTCACTTCAAGTCTCAAGCTCGC ATTCAGGATT  
TC CTTA TCGAGC TTTCTG TAAA CAGATC GAAA TGAT GAAA GCGGACTG CAAA CTAGTTGTT TTTCTC  
CATATAGTATAGATT GGATCGTATTGCGTAATGAGAAA GATTC CCCTATCGACAT GAAA AAAATAGGGGA  
GGAGGATGTGTATGCG GAATAAGTGTGTAGGAG GAAT TTTAATTGTTGCGGGGACTGTAATAGGTGCTGG  
TGTGTTAGCCGTTCCAT CAAA ACAGCTGTAGAA GGGT TTTTC CCGCGTGGTGCTATATGTGCTCGCT  
TGGTTGG TTTTC GTTAGCCTCAGGTTATGGCTATCTGGAGGTGTTAACCTGGTGTAAAG GAAA TAGACAGG  
CTAACTTATGCTCTATGGCTGAA GAAA CTC TAGGGA GAGTAGGACGTATAGTGTATG TTTAGTCTACCT  
G TTTCTAT TTTACTC TTTACTTGTAGCTTATT CAAA TGATGGAG GAAA ATTC TTTCTC GAGT GATCGGA  
GAGAGCTT TTTCTCCTATCC TTGGAT GCGACATGTCATGCCCT TTTATTTTCTCCCTT CAAA CACC CA  
AACTGATGGCAAACACTTCTGTATTGATTATTGCAATCGGGG CAAA ATT CAAA GCCTTATCCAAA TTCA  
AAGGCT TTTCTGCGTATT GGGTGTGCGCGTATACAGGGAGA ACTGCTATTGCGAGCTTCCCTGGT TTTCC  
TCTCTTAATAGCTTGCCAT TTTCTTCTTAGCA CAAA GATTTT GAATGTGGTGCCCTC CAAA TATCACT  
ACTT GGATGG GAATATTCGTGAGGT TAAACGTGCTATTC TAATAGGGAG CAAA ATTC TTTAATTC TCTA  
TATTGCTTGGGAAGC CAAA GT TTTA GGGACGGTTCCTTAGTCGACTTGC TAAA AGCTAAGGATTTAGGG  
TGGACTGCTGCAGGAGCTCTCAAGGATC TTTAAA GAATTC TGCTT TTTATATTGCCGGGAATTA CAAA  
GATTT CAAA CAAA GTTACTTCT TTTA TAGGGACTGCGTTAGCAT TAAAGGACT TTTATATAGATATTT  
TAAA TGGGATGCTCGTAAGAAA CGGGTATC CAAA TTCTT TTTA GTTCAGGAT TTTCTTTA GTGTGGCT  
ATTT TTTATCC CGAGATTGT CAAA TCTGT TTTA CGCTATGCTGGGG GAATAGGGGGAGCTTGCATGTGCG  
TGTTATTC CAGTAGCCATGTTATG GAATGGACGCTATGG GAAA CGCGTTC CAAA G TAAA AGGATATT  
GCCAGGAG GAAA GACCGTCTATTAATTC TAACAGGATATACTGTGT TAAA TCTTGCAACCCGTATTAT  
GCGT TTTAGAAA GAAGTTATG TAAA AACTAT TTTAAA TTAGGAGATCTCCATG GGAT TGTATGATCGGA  
TTATGCGCAGGATTC CCGCTGCCAGGGACCTTCTCTTCCAGAGTATAT GGGTGGAT GACGGCAGGGCTA  
GCTGTGACTGCTCTAACATCTCTAGGGT TATACGCAACAGGAGCGTACAGAGCGCT TTTCCCTATGTGGT  
GGACAAA GTGT CAAA CAACGCTGG GAGTGTCTTCTAT ATCC AAGCCAGATTC CAAA ACTTTCTGTCC  
TGCTGTAATGGGAT TGTT CAAA GCCTACTCTATTC TAGAAGGGAT GTTC CAAA GAACATTGGTACCCGTA  
TACGCCGCTCAA CAAA GAGGCG GGGT AGTGTGGCCGCA CAAA GGTCTGCTGGTATAATCTTC GGATGT  
CAGCAGCGTATGGAGC ATTC ACTAAGAATGAT TTTA ACACAAATTC ATAGAAT CAAA ATGTTGGCACTTGT  
GGGCTGGTAGTGATATCTTAGCCTT TTTA ATAGTGTCTCTCTTCCAGCCTATGCCGTTGTTATATCTG  
TTAA CAAA TACTTAGG CAAA ATTATC CAAA TAGGTCGACAGTAGT GGAT GCGCAGTCT ATTC GTCGTG  
TTGCTCGTAGCGTAGG GGATCATGGAGATCTTAGTTATAAGC TTTCCAAAATCATGGCTCTACAGATGTA  
CTGCAATGTAATTATGATAT CAAA GTA CAAA TTGCAGATT CAAA CCTCTTCTGACAAGAGACGG TAAA GG  
TCGATC GAAA ATAGAT TTTCTAG GAAA AAAAAGAGGTA TTTA GAGT TCC TAAA TACCTCTTT TTTA TGGG  
TGAAGAAGGAGG GGAT TTTCTAG TTTCAACATCC AGTAATTTA TCTA GAAAACGGTCTATGGCAAAGGT  
TC GAAA TCATGAAT TG TTTCTCCATAGCCTACGAACC GAGTAG GGAT CAAAAGT TCATCTGCGATACGGA  
AGAGAGAGCCTCC CAAA GCAGAACC TCCACT CAAA T GAAAATAAGTCCATTGATAGGTACGGCTTCATG  
GAATAGTTGCACCTGACT CAATGTGTTGCTTCCAGAGTAGCATCGATCGTCATCAGTGTCTCATGCGGA  
GCTCCAG GAAAAGC CAAA TTGCAAACGGTAGCGAT TTTCTGAAGTTC TTTAAGAAGATTCGTGTGTGTGT  
GTAACCTTCCC GAAGTATCTATGATCACATGATCATAGTCCCTAGCGACTGCTGCAGAAATCC CATCAA  
AGCTATCGCAGCAGCATCTCCTCCAGG TTTCCCTGAGA TAAA CCCACAG TTTAAGG TTTCTGCCAACAA  
CGCATCTGGTCC ATTC CTGCGGAACG GAAA GTATCAGTAGCTACAAT TAAAACCT CAAA GT CAAA GAAA  
GATAATAGTGAGCCAG TTTCCGCAACTGTGGTTGT TTTCCCGAGCC ATTCGTTCTTAGGACAA GAGTAGA  
AA AAGGACGAACA GAAA GAGGCTCTCGTTGGGGGAGCTTA GAAA TAATC CAAA ATAA GAAA GAGC GAATA  
AGCTC TTTCACTGCCGTT CATCA GGAT TTTA CATCGCGTAATTC TTCGAAAAAGCTTCTGTGCTAGCT  
TAGGGCCAAAATCTCCCTCATACAAGAGAACTTCAGCAT ATTC TAATAAGTCAGAA GAAA GCGTTC TTT  
AAA AAGAGAGCG GAGCAAATTT C GAAA AACTTGAACACT GAGT AATCAAAGTTGATTGAAG TAAA AAGA  
ATAA TAAA AGATAAGGAG GAAA AAT TAAAGGGT TA TTTA TGCATCTTCAT GAGT ATCAAGCTAAGGACCT  
TTTA ACTGCTTATCAACTTCC ATTC CCCCTATCACGTAGCGACCTCCGTACCTGAAGTAGAAGCAGCG

ATTC AAGCCGAACAATG GAAAGCTGGTGTGT GAAAGCACAGGTT CATGCTGGAGGAAGAG GAAA AAATG  
GAG GGGTGGTTATTGCGC ACTCTCCGGAAGACTTATTAGCAGCAGCTGATAAGCTACTGCATATGCAAT T  
TTC TAGTAATCAGACAGCAGGGT TGTCTCTTCTGTTAA TAAA GTATTGAT TTC CCC TTTA GTAGAGATT  
GCTTCG GAGTATTATCTTGCATCGTCATCGATA GAAA ACATCGTTGTCCTGT CATTATGCTATC TAAAG  
CAGGAGGTGT GGATATCGAGGAAGTCGCA GAAA AGCAGCCGGAT CAGCTGCT TAAA ATGACACTACCTTC  
TTCTG GAAAAA TTTA TGGTATCAGTTACGCCGTATTGCTAAGTTCATG GAGTGGAT CAACCTATTGCC  
GATCAAGG GAATCGTATC ATTCGCCAGTTATTACAATGTT TTTA T GAAAAGGAT GCTTC TTTA TTAGAGA  
TTAATCC ATTGGTACTTAC TAAA GACGGTCTCTTGT CATTCTGGAT GCCAAAATGACGATTGATGACAA  
TGCTC TTTA TCGAC ATCC TGAGCTAGCAGACTGCTATG ATCC TCTCAG GAAA ATATTCGTGACGTA  
GCTAAGCAGTTAGGCC TTTCA TACATTGCTCTAGATGGAACAATC GGATGTTA GTCAATGGTGCA GGAT  
TAGCGATGAGCACCTTAGATATTC TGAAGTTATATGGCGGTTCTGCTGCCAAT TTC TTAGATGTAGGAGG  
AAGTGCTTCT GAAA AGCAAATTC AAGAAGCTATCTC TTTA GTCTTATCTGA TAAA AGTGTGCGCGTGCTC  
TTTA TCCATATT CAAA GGGGGAT TAT GGAT TGTGCAGTCGTCGCTTCTGGACTTG TTTCTGCTATGCAAG  
GACAGAAAAGAAA CGATCC TACTGTAAATTCGGTTAGAAGGGAC GAATGTAGATAAAA GAAA GGGCATGAT  
TATTAACGCAGGAATTC CTTGT GAGT TCGTTACATCC ATGAGCGAGGGGGCTGAAC TCGCTGTGCAATTA  
AGTCGTTAGCTGGGAGA GAAACTGTGTTA GAAT TATTAAGCAA GGATTTA CCGATTATTACACA GGGTAT  
TACAGG GAAAGCA GGGTCT TTTCA CACTACACAATGTGTGCTTACGGATCTAAC CAAATTGGAG GAGTT  
ACTC CAGGAAAGGGT GGGAGCCAAT TTTAGACTT ACCATT CAAA ATTC TGT CAAA GAGGCTAAGCAAG  
CAACAGGTTGTGCTGCTTCGATGATT CAAATGCCGCCACCG CAAA CTGCAGAAGCCAT TTTT GAAGCTGA  
AGATGCTG GAAT TGAGCTGATAGTCTGTATCACAGAAG GAATTC CAATCAAGGAT ATGCTTGAAGTAGCT  
TCTCTTATG GAAA AGAGCGCAAGCTC TTTA ATTGGGCCAACTGTCTGGAGT GATCAAGCCTG GAGCAA  
ATAAAA ATTGGCATCATGCCTGGGT AT ATCCACCTTCTGGGAAGGTAGGAGTGG TTTCTAGATCAGGTAC  
ACTTACGTATGAGGCTG CAAA GCAACTTACGCAA GAAA GATCGGACAGAGTGTGTGTATCGGTATCGGA  
GGGGATCC TTTAAA TGGCACATCT TTTA TCGATGCTCTCCAAGAG CAAAAA AGGATAGCCAAACAGAAG  
CTGTTCTTATGATTGGAGAGATTGGTGGAAAGCGCTGAAGAGGAAGCTGCAGATT GGATACGTC AACATAG  
TAGTAAGCCTGTGATTGCATTTA TTGCAGGAGCTACGGCTCCCAAAGG GAAA CGTATGGGACATGCAGGA  
GCTATTA TTTT CAGG GAAA AGTGGGGATGCT TTTA GCAAACAAGAAGC CAAA AGACAGGCAGGGGT TACCG  
TTGTAGAATCTCTGCACTGATTGGAGAGGCGGTTGC ATCC GTTC TAAA ACCACGTTAGTTTT TTTA GATT  
GGAGAATCATCAGAGT AGTCTCCTTGA CAAA CATCATTAGAT CAAA TATGCTGCATATCTGCTTGT TATG  
GTGCA TAAA ATGAAA AAAAAAGGGCC TAGACGCCAGATCGCTTATCAAG GAAA AGATGAT GAAA AGAT  
TATTATGTGTGTTGCTATCGACATCAGT TTTCTCTTCGCCAATGCTAGGCTATAGTGCCTCAAAGAAA GA  
TTCTAAGGCTGATA CAAATCTTGCAATCC T CAGGAGATCAAGAGG TTTTACAAGAAGATCTGCTCAA  
GAAGTATCCCGAGGAT TTTCTC GGGT CGCTGCTAAGGCAACGCCCTG GAGTTGTATATATA GAAA AT TTTT  
CTAAA ACAGGGAACCAGGCTATTGCTTCCAG GAAA CAAAAGAGGC TTTTCAAGAGA ACCCTCAA ATTA  
TTTTA ATGACGAAT TT TTTAATCGATTT CAAA GGT TGCCTTCGTATAGAGAGCAGCAGCGTCCGCAGCAG  
CGTGATGCTGTAAGAGGAACTGGGTTCATTG TTTCTGAAGATGGTTATGTTGTTACTAACCATCATGTAG  
TCGAGGATGCAG GAAA AATTCATGTT ACTCTCCACGATGGACAAAATACACAGCTAAGATCGTG GGGTT  
AGATCC AAAACAGATCTTGCTGTGATCAAATTC AAGCAGA GAAA TTACCATT CAAA ACT CAAA GAAT  
TCTGATCAGCTGCAGATAGGTGACTGGGCTATTGCTATTG GAAA TCC T CAAA GAT TGAAGCAACGGTCA  
CTGTCG GGGT CGTTAGTGC TAAA GGAA GAAATCAGCTACATATTGTAGAT TTTT GAAGAC TTTA TTC AAAC  
AGATGCTGCCATTA ATCC TGGGAATTC AGGCGGTCATTGT TAAA CATCAATGGTCAAGTTATCGGGGT  
AATACTGCCATTGTCAGTGGTAGCGGG GGATATATTG GAATAGGG CAAA CTATTC CTAGCTTGATGGCTA  
AACGAGT CATTGATCAATTGATTAGTGATGGCAGGTAACAAGAGGCTT CAAA GGAGT TACCTTGCAACC  
GATAGATTCTGAAT TGGCTACTTGTACAAATTG GAAA AAGTGTACGGAGC CAAA GTGACGGAT GTTGT T  
AAA GGTCTCCAGCA GAAA AAGCGGGCTGCGCCAAGAAGATGTCATTGTGGCTTACAATG GAAA AGAAG  
TAGAGT CAAA AGT GCGTTGCGTAATGCCA TTTT CCTAATGATGCCAGGG ACTC GTGTTAT TTTAAA AAT  
CGTTCGTGAAGG GAAA ACAATCGAGATACCTGTGACGGTTACACAGATCC CAACAGAGGATGGCG TTTCA  
GCGTTGCAGAAGATGG GAGTCCGTGTTCAGAACATT ACTCCA GAAACAATAA GAAA CTGGAT TGGCAG  
CAGAT ACCCGAG GGATTC TGGTAGTTGCTGTGGAGG CAGGCTCGCTGCAGCTTCTGCAGGCGTGCCTCC  
TGGACAGCTTATCTTAGCGGT GAATAGGCAGC GAGT CGCTCCGTGAA GAGT TAAA TCAGGT CAAAAA  
AACTC GAAA GGAGAGAAT GTTCTCCTTATGG TTTTCAAGGAGATGTGGTGCAGTT CATCGTCTT GAAA T  
CAGAC GAGTAGTCTTGGCCTTATAT TTTAGGAAGCTAGTCTAGTATGGGG ACTCAATC GAGTCCCTTTTT  
TT TTTAATAAGAGAAGCCTTCAGAAA GAATA CAAA TGT GGATATAAGAGCTCTAACCATGTAGGCTGTCT

TTC TTATTGTTAGGTA GAAAC GAAA TAGGGGAGAGCAAACAACCTTCTCTATTATAGAAGATT GAGTGGGA  
TAT GAAA ACTGG GGAT ACCTATA GAAAT CAAA TAGTCAAGTT GAGT CAGGAT CTCCCAGATCGAGAGC  
AAGCTAATTGAAGTGAACAT ACTC CGACCGGGCAACGATCATGATGATCGT GAAT GATGATGAT GAAA  
ATGTGTTCAATA TTTC TTTC GGACTTGCCC GCAAG ATTC TAGTG GAGTGGCTCACGT ACTC GAGCATAT  
GGCCTTATGTGGGT CTGAGAGT TACCA ATTC GGATCCTTT TTTC TCAATGACAAGACGTAG TTAAAT  
ACCTTCAT GAAT GCGTTCACAGGGGCTGA TTTC ACTTGTTATCC TCGGGCTTCTCAGATACCAGAAGATT  
TTTA TAATCTACTC AGTGTGTATATTGATGCCGT TTTC CATCC GTTGTAAACAGAGAACAGCTT CAAA CA  
AGAAGCTTGAGATATGAACGGACAGAGGAAG GAAA TCTCTTTACTGGGAT CGTCTTCAAT GAAAT G  
AAA GGGGC CAAA ATGTCGGGA GAAT CTCGGCTCAGCGAAGCGAT GAAT GCCGCATTTGTTCCCTTCGGTCA  
CTTACGGTG TAAA TTC GGGAGGAGATCC TAAA GCAATTG TTTC GCT GAATTTAGAAA CGGTCCGCGCTT T  
TTAT GAAA GTCAGTATACGCTCAGTCGTTGTCTTT TTTATT TTTA TGGGAATAT TAAA CCTAGCCGTCAT  
TTAGATTTTC TTAGAGGA GAAA TTGCTGAGACGTGTAGGGAAGGTAGAGAAGCAAAGTGTAACTC TTCCTC  
TGCAGAAA CGTTTC AAAGAACCTGTACGTGTGATT GAAA GAT ACCC TTCCGATGGGGCAGATGAAGATAA  
GGTGCTT CAAA GAT TAGCTTGGCTTACTTGTCAAT CAAA ATCAGCAAGATCTTCTTGCTTTA CATGTT  
CTGGAT CTAGT TTTA ATGGGAAC GGAT GCAGCTCC CAAAAA TCTCGATTGCT GAAA CTGGAT TATGTA  
AGCAAGTTGATAT GAGT ATTGACAGCGAACTTCATGAGATCC CTGTATATATTG CAAA TAAGGGAT GTTC  
TCATTC AGGAAGTCA GAAACTG GAAA GTCTAAT TTTA GCTAG TTTA GAGGAGATCC TTCAAGAGG GAATT  
CCGATGCA TTTA GTTGAAGGAGCTGTGCATCAGCTA GAAT TAGCAAGGAAGGAGATCGCAGGGTATTCTA  
TTCCTTATGGAT TATCATTGTT TTTC CGAGCAGGTCTACTAAGACAGCATGGAGG GAAA GCGGAGGATGG  
GT TAA GAATCC ATAC CAAACAAA CTAACTTGCGAGA GAATATCC AAAAGCCAGATTATCTACCAGATTG  
GTGCGGAAGTAT TTTC TTAGATA ACCC GCATTATGCTCGCGTCATC TTTC TCCCAG ATTC TCAGTTGATTG  
CCCAAGA GAATAAA GAAGAACGTAATGTTCTACACACA ATTC AAATGCAAAT GAGT GAGGAAGAAT TAGA  
GAGAGT AGAGGCAG TTTC TAAGCG TTTA GAAGCATATCAGTCGCAAGAAGAAGACAAAAATAAAGTGTTA  
CCTCTA CAAAC CAAA GACAAAGTTCCTTCTTAGG GAAAGAG CAAA TGTTAGAGAAA GAAGTACAAA CAG  
AAGGTGAAGTCTTCATCATGACTG TTTC ACTAATGATATTATT CAAA TGGAACTCGTT CAAA ATCTTC  
AGCTC TTTC GGGCGAA GAAT TGCCATGGTTACGCTTCTCGTT CAAA TTCTGTTACAGTTGGGAAGTGGG  
AAT CGCTCTTACAAGAGCACTTG GAATTTTC TTTA GAGCATACTGGTGAGTGGATGTCC TTTAT GAGT  
TCTCTTCTCAAGCTACAGATACTGATCG ACTCTC ACCCTCGATCAGT ATCC GTGGTAAGGC CAAA ATCTC  
CAAAGCA GAGT ATCTGTTCCAAGTCATAAGAGAAA C TTTAACAACAGTAGATTTTC TC GGATATTGCGAGA  
CTC AAAGAGCT TTTA ATGCAGCATGCA GAGT CTCTAACAAATAGCGTGAGAAA TAGCCCAATGGGATATG  
CGGTTAG CAAA GCCTGCTGCAAT TAAA TCTATTGCGGGAGGCTTAGCATATCAGATGGCAGGACTTCCTTA  
TGTC AAGTATATCC GAGAGCTGCTCAGTAAT CAAA ACTCTCAAGCACAG GAAA TTATAGATCGGTTGCAA  
ACGC TTTA TAAGAAGTGT CAAA TTGGAAGACGGCAGCTTGTATCAGTAGTAG TAAA GCTAATTATCAAG  
TTCTACATGATCAGCGATTT CAAA G TTTAATTAGATGAGAGATTAGA GGGTGGAGAGCTCTG GAAA AATCC  
TGTTCTTGATGTGCT GAAA GATTC TCGAGGCATTGTA ATCC CCGCTCGAGGAGCTTACAATGTATTGGCA  
TTTC CTCTAGGCTCACTTGCTTATGATC ATCC AGATGCCGAGTTC TTTC TGTGTCAGCAGAGGT CAAA  
GGAAT GTCAT TTTA CATGC TAAA ATTC GTGAGCAAGGAGGCGCTTACGGCTCTGGCGCTAGTGCAAACCT  
AGGGCGAGGTGCTT TTTA TTGCTATAGCTACCGAG ATCC GGAAGTGGCTACTACCTATCAGGTATTGCTC  
CAAG GAATTC GTGATATGGCTGCGGGAGA TTTC TCAGAAGAGGAT GTGCATGAAG GAATTC TTGGTGTTA  
TTC AGAATTTA GATGATCC GA TTTC TCCAGGAAGTCGT GGATCTGC ATCC TACTATCGTTCGCGGAGCGG  
TAAGGTGCC TTTC GTTCGTCAAGC TTTC CGTCAGGCTGTGTTATCTACAAC TAAA GCACAAA CAAA TGAG  
GTTGTACGTAATCGTCTTGAAGGATGCC TTTC CGAAGCCTCA CAAATTTCT CAAA CTGGAGAA GAAA TGC  
TACA GAAA AGCGC TAAA GAGCTTAATGAAGC ATTC CAAATAGAGGCTGCAT TTTAATAAAA ACCAAAAGT  
TATTGG CAAA AGGAAGGAGGCTTCAGATAAGAAGCCTCTGG GGAT AAGC ATTC TGCCAGATCGC TTTC GG  
GACAAGGAACCTTCGGA GAAT GAGGTA GGGT GCTTACCTGAGAGAGT GCTTCGAT TTTATTGTGGGAAGA  
AGAGAGCTCTAG CAAA TCAAAGTTC TGA GGAT AGGGAGAACTC TAGCA GAAA GACTAGAAGACATGTCA  
TTATAGCTATGAACAGCTTGCCCTAAGTG CAAA CCTACCTTATG GAAA TGGTCAAACAG TTTA TGC ATTC  
CAAAA ATAGAGGTCT TTTC CTAGTTGTCCAATTTCT TC GAATCTGAT CAAATAAA TTTCTTG TTTC CAAAC  
ATGTGTGACCGTT TTTA TAAA GCCAT TAAA GTCACAGGGCTG GAAA GAATCACATTAGATTGCTCTGCA  
TAGTCCATTAGTTCAGGAGCACAGC GAATAGCATCAT TAAATAAA C TTTC TCCAGGAA GAAA GAGAAT GA  
CAAA TTC AGGGGACTGCTCGAACTT ATCC CAATAGCT CAAA GT TTTA GAGT TTTA ATATGGTCT TTTAT  
TTTT TTTA CTAGATCAGTA GGATCC GCGTGATT ATCC GTAAGGTACTC TTCAAGAAA ATGGAGT TTTA GCA  
TCAATAACTAGACTGCGAT CAAA CGGCAAAC GAAT GACAATGTCTGCTCGAGAAGAAG ACTC ACTGGAGT

CTACTGCAAACGTGCTGTAGTCACAGTATTTCAACATGCCGAAATTTCAAGGATTCCTCTAGTTGAAT  
TTCACCCATCTTCCACGAGATCCAGGATGTTTCAAATATTGGTAAGAGCCTGTGTTTCGCTCTAAC  
TTCTGTTCTGCAGTGAGTAATTGAGAGAGTTGTTCCAAAAGAGCTCCGCGGTCTTCGGCTTGCTTAGTTT  
CAAAATTTTCTAAGTCAAACAAAAAAGCAGATAAGGTATTATGCACCGAGCAAGAACAGAGGTAATGGC  
TTGAGTTTTCACAGAAAAGAATTC TTGAGATTCGTCTTCATGTCTCTAGCAAACGCCTGGGATACCGAA  
GTCAGTTTATGAGAGAACTCCTCCATAACAAAATTCCTTGACTTCGGCGAGTATCTAAAAGACACAAA TAGAA  
TAGCCTTGCTATGCTCCAGATCACGAATGATTTCTGATTGTGCGGGATAGCTTCAAAAGTAAAAATTTTAAA  
GGAGAAGAGCACTCCAGCGCTATTCCTAATGAAAAGAATGTAAA GTATAGACACACAGCAAA CGACAGC  
AAA GAAATAGCGAAGACACCCATATACTAAGAAGAAGATCTTTTATTAA TAAA GAAA AAACAGGAGCAA  
CAACTAGCACGTATAACCAAGAGACAAGGAAA AATACTTGTGTGAAATGGTCCACTAGTCCCAGAGAAGAA  
GAGACAAGCCACTAACCCGATTC CCAGAATAAAAGCGATGAGGAAACGC GAAAATGGAAGTGT TTTAAT  
CCAGG GAAA CGCCAGGTG GAAATCAT TAAACAGCCACT GAGTAATAGGCCGAGAGAGACGAGAAGA ACCC  
GAGCTCGTTCAGGAAGGCTGTTCAAGGTATCAGAGGCTAGTAGCACGCC TAAA GAGACTACACATGCTGC  
AGCGGCAGGAATAGGAAGTCTGT TAAA TG TAGTTGCTTT TTTCTCCCGTAGCGGCAAAGAGATTATAGCGT  
ACTAAGCGAAGTACTCCACACAGAGAGTAGATGATACAAGTCACCAGGAGGAAA GAGGAACAAAAGGTTT  
CGCCGTATTCCTCCATTC AAGCTTTTAAATCGCAAT TAAAAGGAGGCGCTATGCCAAAAGTGATAGCGTCAGA  
CAAA GAATCGAAGTGAGCACC GAAA GCAC TTTTCGCTTTTATAAATTC GTGCGACAGCTCC ATCC GAAA AA  
TCTGCAATCATAGCGCTAATAAGGAGTAGAGAGAGCCCTGTAAGCGGTGCATGAGCTCTAGTGAAGAGG  
AAGT TTTCAACACGCT CAAAAAATAA TAAAAGAGTCCGCGACAAAGACCAAAGCTGTAATGGCATTAGG  
GGTCACAACCTCGGCGCTTACCACGAAGGTCTATTTCAATTCGATTCATATCTTCCCTCAGGAATCGCGGAA  
ATTTATTACAGAAA TCAGTGGGGCTTAG TTTATTTT CAAATAGAGAAGCTTCTTT TTTATGGCGTGAACAA  
ACATTTATGCAAACAAATATACATCTCC CAAA ACTTGAAC TTTCTAGTGCCAAAAGGAC TAAA CAGCGC  
ATATTT TTTACATC TTTCCAAATAAA GCCTAAGGTGATGTTACACAAAACATGT TTTCCGACTACACAG  
AAA ACCCACAGATAGTTATGGTTATTGCGTGT TTTCCCTGAGCAAGT GAAA TGATAGAGAGGTAAGCTGC  
TTCTTCAAACAAGAAA AAAAGCACAAAAAGCTAGATGT TTTATGTAGGACATCATGCT TAAAAG CAAAC  
TCTC GAAAAGAAA TT TTTTCATCGCAG TTTATGCTATT TTTCAATTGCAGGAAA CGTTGCTAGCTTCTATA  
TATGGTATACAAGAGCCGAGAC ATTCACAATATCTT GGGTT TTTAGGGGCTCACAT ACTCAAAGGATAAT  
ACTCTGATT TTTAAGTATAAGATAAGGGCTCTCTCTACCGTTTT CAAAACGGATAGGGGACTAGAGGGC  
TCCAAA CTTCAAATAGAGAAT AATGCGTATTC AATGT TTTACAAGGATAGTTATGGTCGATCTACAAGAA  
AAGCAATGCACAATTGTTAAGCGCAATGGAATG CAAA TTCC TTTGATCGGAACCGTATTT TTTAGGCTT  
TAGAAGCAGCT TTTGAGACACTCGCAGAATTGATGATCATATGCC CAAACCTGAAGATCTGGAAA GTTC  
CATACGCTCGATAACGCATCAGGTAGT TAAA GAAGTGTGTGCAAAAAGATTACAGATGGACAAGTGGTTACT  
GTAGAGCGTATCC AAGATATGGTT GAAAGCCAATATATGT GAATGG CAAA CAAGATGTTGCTCGCGATT  
ATATTGTCTATCGCGATGACCG TAAA GCGCATCG GAAA AATCTTGGCAAAGCCT ATCCGTTGTTCGTCG  
TTGTGGGACTGTTGTACAC TTTAATCC TAT GAAA TTTCCGCCGC CAAAGAAAAGC TTTCCGAGCTACC  
GATAAGACTGAGGGGATGACTC CAAGTCTGTGCGAGAG GAAATCAATGC CAAAACGCAAAACATTTGTTCG  
CG GAA TAGAAGAAT GTTGTCTCAACAGGATAGACGCATTGATATCGAGAAGATTC AAGATATTGTTGA  
ACAGCAACTAATGGTTGTTGGGCATTATGCTATTGCAAAGAACTAT ATTC TTTA TCGAGAAGCTCGCGCT  
CGTGTTCGTGATAACAGAGAAGAGGACGG GAGTACA GAAAAGACTATAGCAGAAGAAGCT CAAAAGGTGC  
TCAG TAAA GACGGTCTACCTATACAATGACGC ATTCGCAGTTGTTGGCTCAT TTTAGCGCGCGCTTGTAG  
TCGT TTTCCAGAAA CGACAGATGCGGCGCTGCTTACCGATATGGC TTTCCGAAA TTTCTATTC CGGCATC  
AAA GAGTCTGAAGTAGTACTGGCCTGTATTATGGCGGCTCGTGCCAATATT GAAAAGGAGCCTGATTATG  
CCTTGGTTGCTGCAGAGCTCTTACTTGACGTTGTATATAAGGAAGCGTTAGG GAAATC GAAAATATGCTGA  
GGATTTA GAACAAGCACATCGCGATCA TTTCAAACGCTACATCGCAGAAGG GGATACCTATCGTCT GAAT  
GCTGAACT GAAA CATCTT CAAA TTTA GATGCGTTAGCCGATGCTAT GGATCTATCTCGAGATCTACAGT  
TTTC TTACATGGGTATTC AAAATCTGTATGATCGTTAT TTTAATCACCACGAAGGTTGCCG TTTAGAAAC  
TCCCAAATTT CAAA GATGCGCGTTGCTATGGGGT TGGCATT GAATGAGCAAGACAAGACTTCTTTGGGCT  
ATTACTT TTTATAA CAAA TTTCCGAC ATTC CGATATACACCAGCTACGCCAACCC TGTTCAATTC AGGTA  
TGCGGC ATTCCTCAGTTAAGCTCTTGCTATCT TTTCCACTGTACAAGATGA CAAA GTCAATATCTATAAGGT  
CATTGCTGATAACGCTATGCTATCTAAGTGGCAGGAG GGATAGGTAATGATTGGACGGCGATTC GTGCA  
ACAGGGGC TTTAAT TAAA GGAACCAATGGAAGAAGTCAGGGAGT AATTCCT TTTA TTAAGGTGACAAATG  
ATACAGCAGTCGCAGT GAATCAAGGTGG TAAA CGCAAGGGAGCTGTATGCGTCTA TTTAGAAG CAAA GCA  
CCTCGACTACGAAGA TTTCTTT GAAT TGAGAAA GAAT ACAGGGGAT GAGCGTCGACGGGCTCATGATGTC

AATACAGCTAGCTGGATTCAGATCTTTCTTCAAACGTTTACAGCAAAAAGGGACATGGACTCTATTCA  
GCCAGATGATGTTCCGGGATTACACGATGCTTATGGGGAAAGAAACAAAGCGCAAAATACGAAGAATATGA  
GCGGAAGGTTGATACCGGAGAGATTCGGTTATTCAGAAGGTAGAAGCTGAAGATCTGTGGAGAAAATG  
CTCAGCATGGTTCAAAAAACGGGACACCCATGGATGACTTTTAAAGATCCATCCAACATCCGTTCCGGCTC  
AAGATCAATAAGGCGTGGTGCCTTGTTCCTCAATCTGTGTACGGAGATCAAATTAACCTGCTCGGAGACAGA  
AACTGCTGCAAAATAATTTAGGATCGATTAACCTTAGTTCAACATATCGTAGGGGATGGGTAGATGAGGAA  
AACTCTCTGAGACGATCTCTATAGCAGTCCGTATGTTGGATAACGTGATTGATATTAACCTTTATCCAA  
CAAAGGAAGCTAAAGAGGCGAACCAAACTCACCCGCTATTGGATAGGGGTGATGGATTCCAAGATGC  
CTTGATAAGCTAGATATAAGCTATGCTTCGCAAGAAGCTGTAGAACTAACTGACTACAGTTCAAGATTG  
AATTCCTACTATGCGATTCAGCTTCTTGTCTGCTCGCTAAAGAACGAGGCACTTACAGCTCTTAATAAG  
GATCGAAATGGGATAGAGCAAACTCCCTATTGATACGATTCAGTTGTTAGCGAACTATCGAGGAGAAGC  
AAATCTCCAGATGGATACGTCATCAAAGAAAGATTGGGAACCTATCCGTAGCAAAGTAAAGAGCATGGT  
ATGCGACATTGTCAGCTTATGGCTATAGCTCCGACAGCGACGATCTCCAACATTATAGGAGTAACCTCAAT  
CTATTGAGCCAACGTACAAACAACAACAAATGAAGTCTAACTAACTCCGGAGAATTCACGATTCCAAATGT  
GTATTTAATTGAGAAGTTGAAGAAATAGGTATCTGGATGCTGATATGTTAGATGACCTAAATATCAA  
AATGGGTCTTTATTGAAATCGAGCGTATACCAGATCACTTAAACATATTTCTTGTACAGCTCAAAAGA  
TTGAACCAAGAATGGATTATCGAATGCGCGTCTCGAAGACAAAAATGGATTGATATGGGGCAATCCCTCAA  
CCTTTACTTTGCCAGCCAGACGGGAAAAACTGTCGAATATGTAATTTAACGGCTTGAAAAAAGCAAA  
AAAACCTACGTATTATCTGAGATCTTCATCAGCAACGACCGTTGAAAATCTCAAAATAGATATTAATAAGA  
GAGGAATTCAGCCTCGTTGGATGAAAGAAAGTCTGCTTCGGCAGGAATATTGTTGAAAGAGCGAAGAA  
AGCACCTGTCTGTTCCAAAGAAGAAAGGGTGTGAAGCATGTCAGTAATTAATCATAATAATTAACAAATAA  
ATTAACGGTCTTATGCAAGCAGATATTTTATGATGAAAACAAGAAACGCGTTAATCTAAATAGCAAGCGT  
CTAGTGAAGTCAACCAGGTCGATGTCAACCAACTTGTTCCTATTAAGTACAAATGGGCTTGGGAACATT  
ACAAAATGGCTGCGCAATAACTGGCTCCCTACAGAGATCCCATGGGGAAAAGACATCGAATATGGAA  
GTCGGATCGTCTTTCTGAAGATGAGCGGCAGTCACTCTCAAAAATTTAGGTTTCTTACGACCCGAGAG  
AGCTTGGTTGGGAATAATATTGTTCTAGCAATTTTAAACATGTAACATAATCCGGAAGCGAGACAATATC  
TTTTAGACAAGCTCAAAAGAAGCGGTTACACGCACACATTCAAAATATACAAAATGAGTCACTCGGAT  
AGACGAGAAAGAAATTTCAATGCCTATAACGAGCGTGTGCGATTAAAGCCAAAGATGATTTCCAGATG  
GAAATCACTGGCAAGGTATTAGATCCAAATTTCTGCACGGACTCTGTTGAGGGTCTACAGGAGCAAAATTA  
AAACTTAGTAGGATACTACATCATTATGGAAGGGATTTCTTCTATAGTGGGCAATGATGATCCCTTCT  
CTTCCACAGACAAAATAAGATGATTGGTATTGGAGAACAATATCAATACATCTTAAGAGATGAGACAATC  
CACTTGAACCAAGTATTGACAAATCAACGGGATAAAGAAGAGAACCCGGAGACAAAGACTCCAGAGT  
TACAGCAAAGAAATGTCGAATTAATTAAGCGAGCTGTGATTTAGAAAATTGAGTATGCGCAAGACTGTCT  
CCCTAGAGGGATCAAGGATGAGAGCTTCGATGTTTCATCGATTATGTGCAGCATATTGCAGACCGTCCG  
AAAGAAAGAAATCGGATTAACCTAATTTATCATAACAAAACCCATTCCTTGGATGAGCAAAATAG  
ACCTAAATAAGAGAAACTTCCAAAAACAAGGGTTACAGAATATCAACATGCAGCAAGCTTAACCTG  
GTAGTCCGTGATATCAAAATAGGAGAAACCTCAACCATAAGTGTGAGGCTTTTTCAATCATAACGGCAAC  
CTGATAAGAAATTTTATGATTTCTAGGTTAGAAGTAAATGTAATTAATCCATGAATTTTTTTAATTTCTC  
ATAATATCTTGTAGCCCTTTATTAATGAAATGAGAAAGGCTAGTCACTCTCCTATGACTACTGTAGAGTG  
GTGAGGCAAGGGTGGAGCAGGTGTAGCCTTCTGCATACGAAGTATTTCTGTGAAACCAAGACAA  
AAAACTTCCCTATTCAAAGGAAGAACGCTCTCCTCAAATAGCAAACCATGTATTTATGTACCAATTAC  
TATTCCTGATACGAAGAGCAAAATAATGCCTACTTGGCAAGAGTTACAACCTAATAATGGCCCTACAAAT  
GTGAGTTATGCTCAGGGAATGGGATGGGTAGTGAACAAGCATTAAGATGCTTCCGTTAATTGGAT  
TGCTGTTGAAAACGTCAAAATCAGGGTCCGTAAGAACAAGTCAAAATGGGTAAATATCGCGTGAATAAT  
CTGCTTATTGTCTGTGGAGAAGCTCAAACCTTTTCTCCATTATGTATCAGATGCATCGTTCAAAAA  
TTGTAGTCAATTTCCAGATCCCTGGCCTAAGTTCTGGCATCGAAACATCGGCTATTTCAAGATCTTT  
CGTTCAAGACATGATGCGTACTCTAGTAGTTGGTGGGCAATTAACCTTTGCAACAGACGATTATAACTAT  
CTGGTAATGCGATTACAGTGTGTTGAAGTACCCTTCTCCAGGTCATAAGAGCCCTCATTACATCAATG  
TCAAAGACAATTACGGAGGATCCCTGGTTCGAAAATTTATGGAGATCTAAAGGACAGGAGATTTCTGTAC  
GGAATTCATCAAGAGAGTGGGATATAGCTGACTTGAACAGCTGACCTTACGATGTCAACGTGACGCTC  
TAACCAACTGAGCTAATACCCCATGTGACTCGCATCCCTTATAAAATGATGTGGGATCTTTTCTTCAAGAGG  
CTTATGATGTTAACAGGGATAGATATACTTTTATGTAACATAATCAAGCTGTCTCATTCTATTCTTCTGAC  
AGGTGGTTGAGCCAGGAGATACTATTGTTGATGCAACCTGTGGAAATGGTAAGATGCATAATCTTCTGGC

TCAGTTATTACGAGG GAAAGGTCG CAAAGTTG TTTACGATATTC AACAAGAGGC CAAAGATCGAGCAACC  
GCTAAC TTTC AAAGC GGGT TATTAGCTGAGGAACGAGCGATTATTGAGATGAAGCTCTGTTCACAT GAAT  
ATCTTCAAGAGCAGGGAGCTAAGCTC TTTCATTATAA TTTAGGATA CAAACCTAGCGGAGATAAGCAGAT  
TACTACATGTAGC GAGTCCACAGTTACCAGTATCTACAAAGCATTAGAAT TAGTCGCTCCTTCAG GAATA  
GTCAGTGTG CAAA TTATCC TGGGCATCAAGAAGGAGCCGCA GAGT TATGTTGTGTGGAGCAAGTGGCTA  
CGGATCTAGATCC AAGTATGTGGGAAGTATGC ACCACTATTC TG TAAA TAGAAG GAAT GCTCCTAGGTT  
A TTTC TT TTTC GCAGACGACAAGGCTAGAGGC GAAA GGGATGATACGGACTTC TTTA TGTAAG GAAA TA  
CCTTGTTT TTTA AGAGT TT CAAA AAT GATCTCGATAAGCTCTAGGAT GTCTGCGGTACAGGCAT TTTC CGG  
TATTAATAAT GAAA TTGCCATGTT TTTCAGATATCTGCCCGCTCCTATCTTCA ACCCT TTTAATCC AGC  
TCGATCAATAAGTGTCTCTGCAGACAAGCCTTCA GGATTC CGGAAGATACAGCCTGCGGAAGGGTATTCG  
TAGGGT TGT TTTA GAAT GCGTCTTCTAT TAAA GC TTTAGCTCG TTTA GCAGCCTGA GGATCC TTAGTTA  
GCT GAAA TGTCGTGAGGCA TAAA AGCTGGTTTTT CAAAAA AGGGGAAGTCCGATAG GAAA AAAGAAG  
CT TTTC CCTAGGTATC GAAAG TAAA ATTC CT GAAT GGTCAATAA TTTC TACGTTGATGAGAGAAGAGGCT  
GTGTTAGCTAGAGT AGTGCCAGC ATTC A TAAA CACAGCTCCACCAACGGTTCCTG GGATTC CTACGGCAA  
ATTC TAATCCC GAAA ATCC TTGAGAA GAAA GCCTCTTCCCTAACAGAGCAAAGGAAG ATCC T GAAA GGAC  
CTTGA CAAATGT ATCC GAGAGGAACTC TTGTCC TT GGATATTATTATACAAAGACAAGGCCATCAAATCCT  
TGATCATCAAAAAGGCAATTGGATCC TTTC CAATAATAATATAGGGCAAG GGGTGGGT GTGGAGATAGG  
AAA AGACGGT TAAA GCCTC ACTC AAAGAGGTTA ATTC CT TAAA GTAGCGAGCAGGCCCTCCAATGC GAAA  
AGTG GAAA AGCGGCTTAATGGAACAG ATTC TTGAACA GAAA AAGG GAAAGAGT CGGT CATG GGAT ATACA  
ATGCAAAAGTTGACTGTTCAAGGGAAGCGACACAAGCCCAAGATATCTTGGACG GAGT CGCTCCCTT AC  
TC TGTC ATTC TAATGTGATAGATGGTAATGC TAAA GA TAAA AATATAGGTAT TTTA ACCACACATAGAAGT  
GGGCTCGAGAG GAGT ATCTAAGGCTGGGGCT GGGT GGTCAAAAATAGA ACCCAAACGGCAA GGAT AAGA  
GAACTCCTTCC GAATAAC TAAA TTT TTTAATAAGGC GAGT CG TTTC TGCTATTAGAACGGCTACAGGAA  
CAGGACAGCAATCTTGGT CAAA TTGATGCTCAAAGAGCATCATACGAA GAAT ATTGCGTTCGATAATCGT  
TAAGCGAGCAAGAGT TGTGGTTC GAAT GGTGCGATCGAGCAAAGCATCTAGATCAGGCTGGTTCGCTC GA  
AT TGCTCGACAAAACATCAAGGCGTAAGCAGC ATTC TTT CAAAAA CAGAAGCTTCGGTCATCAGCAGGC  
TAACGAGAGAATCC TCTCCTTCT GGAT CTATTTTC CAGAGCGTATAGCGCCTG TAAA ACGAGCTCGCGTAA  
TT CAAA CAAAG GAAA GGTGCGCTCGCGCAACAGGGGCACAAGC CAAATCAGAAGCCATTACTGACATG  
ATCACACC TAAA AAA GAGT ACAACGCTATGCGCCCTGTAATACGAAGGCTCAGCC TTTCCTCC TTTC TTA  
GGGCGCCAAAATGGAAGGAAGGCCCC GAGTATATAT GAGT CATTATT TTTAT GAAA GAGCGGACCTGCTT  
ACCAGGGCGATCGA GAGT TTTT CAAAAAATAAAA AAAATGT CAAA TATGAAGGTTCAAAGGTCTACACAT  
TTCTCTTATGGAAGAAG GAGT GAAGT TTTA GCGCAATACTTGATAATAATCC TCATCTATAGGTACCA  
TGTAGAGTCTAGAGCGGAGGCGTCTAGATTATGTGCG GAAT GC GAAA GATTG TTTA GACCAGAAGGAGA  
AATCC CTCTTCTTGGGAA GGGT GGTGTTGGTTTTT TTTA GGCTCTCCGTGAGGATTACTAAT TTTAG  
CAGGGT AGATGTGGC TTTAAA CCTAA GAATAAAA TAGGCAGATACGAGCTCCTA GGGT ACGTGAATAGGT  
TCCG CAGGAGAGCAGCTAGGCATATT GAGTATAAAA AGAGGCCCTAGA TTTA GCCAAGGAAGCTGA TTTAG  
ACCTTGTGAGGTTGCTTCAA ACTC AGAGCCTCCTGTGTGCAAAATCATGGACTACGGGAAGTATCGTTA  
CGACATAAC TAAA AAA GAAA AAGATAGTAA GAAA GCACAGCACCAAGTGCATCAAAGAGGTTAAGCTT  
AAGCCTAATATCGATGATAACGAC TTTC TTAC GAAA GCAAAGCAAGCTAGAGCC TTTA TTGA GAAA GAA  
ATAAA GTAAA GG TTTC TTGTATG TTTC GGGGGCGA GAGT TGGCTT ATCC CGAACACGGGCATAAGGTTGT  
TCAAA GAAT GTGT CAGGCTTAGAGGACATAGGT CAAAT T GAGT CAGAGCC TAAA CT GAAT GGCCGTT C  
AAA ATCTGTGTTATTGCTCCGGGAACAC TAAA AACTAA GAAAAAACAG GAAA AAGTCCATGCCCAAGATG  
AAA AGCAATAAGTCCGTTGCGGCGG TTTC CAAAT T GACTGGTCTGGTCAAT TAAA AAGAACTC GTCCG  
GGAAA AGACACAAAT TATCAAAAAGATCTTCGCAACA GAAA CCGAACCTGTCTAAA CAGCC TTTA GT GGA  
TCAAGGTCAGGTGGGCATGTATAAGC GAAT GATGCTCG TTTAAA GATAGAGGGT TTTA GATATGGTAAGA  
GCAACTGGTT CAGTAGCTTCTAGATCGCGTGC TAAA CCGT TTTAAA ACAAGCAAAA GGATTC TGGGGAG  
ATAGAAA GGGACAC TTTC GTCAAAGCCGGTCTCTGT TATGCGGGCTATGGCT TTTA ACTACATGCACC G  
AAA AGATCG TAAA GGTGAT TTTC GAAGCC CAAA GAT CACTCG CAAA AAT GTGGCTTCCGAATTC AT GGA  
TTGTCTTACAGCCG CAAA ATCAATGGTCTCAAACAAGCTGGTATTC ATTTAAA TA GAAA AATGTGTCTG  
AGATGGCT ATTC ATG ACCCTCAA GGG CAAACTGTAGTAGCTACTC AAGCTAAA ACTC GC CAAA GAAGCAGC  
TGTT CAGGGAT AGAGT TTTATGACAATTCAAGAGGAACTT GAGGCTGT TAAA CAGCAG TTTA GTTGTGAT  
GTAAGCCTT GCGC ATTC TTC TAAA GATCT TTTC GATGT GAAA GTAAA ATACCTGG GAAA GAAGG GAAT CT  
TTC GCGGT CAAA CTGATCAGTTGAGGAAGTGCCCTATAGAGCAGAAA GCGACTGTTGGCGCTTCCATTAA

CGCTTGTAAAGCAATACGTGGAGGAAGT TTTACTC GAGAGAGGCAAGGCCGT CAAA GC TAAA GAAGAAGCA  
GAA GAGT TCCTTAAGGAGAAGATAGATATCAG TTTA CCTGGTAGCGAAGAAGCTGCTCTTGGTGGTAAGC  
ATGTTATCAAGAAA GTCCTTGATGATGTTGTAGATATC CAAA TTCGC CAAAGAT CAAA TGTTCCGGGAAGC  
TCCTAATATC GAAA GT GAAAAAACAATT TTTT TCTTCTTAA TTTT GAAGAAGATC ATCC TGCTCGACAG  
ATGCAGGATAC TTTT TA CAAA GATCC CACCACGGTCTTGCCTACGCACACGTC GAAT GTGCAGTCTCGGG  
AGT TAGCGAGAAA CAAACCTCCTGTTA GAAT TGTCGCTCCAGGA GAGT G TTTT CGTAATGAAGACG TTTT  
TGCGGTTTCGCATGTGATT TTTT ACCAAGTAGAGGC TTTT TGCGTAGA TAAA GATA TTTT TTTT AGAC  
TTGACATCGATGTTGGCA GGGT TTTA CCATATCTTC CAAA GACGCAAAGTG GAGT TGCGGTTTA GACACA  
GCTA TTTT CCT CAAA TCGAGCCAG GGAT CGAGGTAGACA TTTT TTGT GAAT GTCATGGAGCC GGAT GTTC  
CAAA TGTAAGCATTC TGGTTGGTTGGAAGTTGCTGGAGCAGGAAT GATTCATCCGAAT GTCTTGCGTAAG  
GCAAGC CAAAATCC AGAAGAGTATTC TGGGTATGCC TTGGGGATGGGT ATAGAGCGTCTCGCGATGCTCA  
AGTATGGTA TTTT CGAT ATTC GATTG TTTA GTGAGAACGA CAAA CGGTT TTTA CGGCAAT TTTT TTAAGG  
AAGAAT GGCAGAGCGG TTTA ATGCACCTGTCTT GAAA ACAGGAGACCT GAAA GGGT CCGGGGGTTC GAAT  
CCCTCTTCTCCGC ATTC CTT TTTA CGAGAACCT CAAA GGGT AA GAGT TGAGGCTCTTCTCTGAAGGGT  
TTTT CAAA TTCTTAGTTAT CAAA TTATAAGCAAAA TAAGCGCTTATAA TTTT TTTT ATTTAGTT TTTAT  
AAAA TAAA ATA CAAAAA GCTAAT TTTATTTATAAAA TAACTAGAAGACAATCTT GAAATAATAAAA AAGA  
CTATT TTTCACTAGCTCTCGGGGAGGCATG GAAA AGACTCGTAAG CAAAAA AAGC TTTAGAGAATTTA  
GAGCAGT TAAAAAAGA TTTT TTACGATT ATTC CAGTGGGAACGCTGAGGCATCGTCTCACAACAAGGCTC  
TCTCA GAAA TGAAGAAGGCTATGCATTATATAGATCACTA TTTT AAGCAAGCAGGAGCTCTCTCTCAAAA  
AGATGTAGATAAAA GTGAT TAAA GAGACAGACTT CAAA ATTGCTG GAGTGCAGGAT GTCT TTTT TTTT TA  
GAGGATCG TAAA GAAGAGGTGTACCGGTCTCTGTCTCAAGATTATCGTCATCTGAACCACACTTATGATG  
TAACTCGTGAACATCT GAAT AATAAGATGGTAGAGCCAAAAGAAA TAC TAAA TGGCTC TTTA GAGAAGCTG  
CCAGGATCGAGAG GAA TTTT TTAATAACCTTGTCTGAAG TAAA ACG GGATCGTTCTTATGAAGT ATTC TAC  
ATGGCAAATGAAGATAATAAGCGGT TTTA TACCGATGCT TTTA GCGCAAATTATCTATAAGCAAGGGAAGA  
TCCAT GAGT CGATGCAT GAAA ATGATCCCTTAAC GAAA ACAATTGTGTGGAAT AGTGTGAGATCAC GAA  
ATTAGCTTCTTCCCTAG TTTA CACGAATGATATGCCA ATTC GGTGT TTTA TCAAAAAGCTCTTAC GAAT  
ATGAGT GCC GAAT TGACGGTGAAT GTACATAACGCATTGATGGC CAAA TTTT TAGCTCGTTATGAAGCTA  
CAGCAGT GAGT CAGCAACCTAGAAA GAAA ATCTCAGTTAT TTTA ATGACTT CAAA CAT TTTT TAAGAAA  
AGCTGCAGCGCT CAAA AATGAAA AAGATCTTCTTGAT TTTA CAAGAAA AACATTC GAAA TCACTAGTATCC  
TCATTGAGCGC TAAA TTATATGATCACACTATTGAT CAAATAGAAGCTGCTAACTATAT TTTT TAAA TA  
TCTCTTC GAAA CTT CAGCCAGAAGAAG GAAA AAGCC TTTA TCTGCAGGACAGTATGTTGCT GAAA TTTA  
TGAT GAGT TACATCGATTGTTCTCCAAT ATCC TAATGGGCCATT ATTC CAAAGCTATAGATAGAAT GCTT  
GACCCATACTT GAAA GAG CAAA ATCC CAT TTTA TTAGGC ATTC TCCCATGCCTGAAGGTAAGCTTATAC  
AAGGAGATAAAGGAGATCAAAGTACTTCGTACACCAAGCCCTG TTTT GCAAAGCTCT ATCC TTTA TGCTAA  
CTGTAATGGAGAGT TCTTACAC TTTT TAGATGC GAAA ACATGTCAGGGAGACAAGAT CAAA GTAATCAAT  
ATTC AGAAT CGGTTGTGCG GAAA AGATCGTGCAGAAAGTGCATTATTGAA GAAT C CAAA CAAGATT ACT  
CTTCTGTGTATAT GAGT GCATTTT CAGAACCAGAAGATTT CAAA TAT GGAT TGGAGCAAGTGCATGGGGA  
ATTA GAAA CG CAAA CGGATTTT TTTT TCTCGTACAGCAAGAAT TTTT CAAACC TAAA GCCCAA GGAT AC  
TGTGTTCTCCAGAA GAAAT GAAA GAGCGTATGG GAGT GTTCTTAGAAGGTATTGTTCTTTC CAAA AAGA  
ACGT TTTT TTCTCAAAGAAAAAATCTT ATTC AAAAAATGATAAAA GT CAAACTTCTACA TTTA ATCTATTA  
C CAAA TTGTT TTTA ATCTGATTGAGCAATTGGATCC TAATACGTTAGTAATTATGTCCAAAGAT GGGT TA  
GATTATGCATCTGTC CAAATTTT CCGT CAAACATTC CAAAAA ATCGAG GAAA TTGGGATGAAGACAG CA  
AAAAGC GAATGGTTGCTAGAAT GTTAGCTCCACATTAGTAGCCAGAGATCGGCTAGTACAAA CTCAACA  
TGTGGAACCTATT GAGT AAGTT CAAA AAT TG TTTA A GAAAAAATCGCCACAATC TAAA AGACCTGAGAAGC  
CTCT TTTT CTATGA TTTA GAGGGGTGGCAATTC CAGGTA TTTA AGCAAGT TTTT GATAAGCA TAAA GGG  
TAAT TAAA AGCATAAA GCCTGCAG GAAT TAAA CATCACCTGGAGAGCCGGTAAGACGCTATTGTTAGCGAG  
AACC ATTC CAGC TTTT AGAACAACAAA GAAA ATATTAATGGTTCCAGAGGGACTAGATATGCCAAGTA  
AT CAAA GGGAGCCGAT GAAA ACGTAAGCAAAGATGGGCAGACAG GAT CACAGCTGCGATACATAATAGTG  
GCGAGATGAGCATATAG TAAA ATAAGGTAAGCAAAGATA GGATCC CAAA AGGCACTGTAGTTAATAGCCC  
AAA TTTT GCTGCATGCCAAGGAAT GGCTTG TAAA AATGCAGAGAAA CTACAATCTTCTCTGTTAT GAAA  
ATCTTGGAGAAA GGGT TGTCGTAATAGCT GAATTC CAATTC AGG GAATTC TTTT ATGTCAAAGAAGCTGTG  
TCAAAGACACTTCGTGAT TTTT ATCTTCG GAAA AATAGGACACTTCAAGCCGATAGGAAGCGATGGAGT  
AG TAAA TGCAAGTTT CAAA ATTGCATAGATCGT TTTA AGGCC TTTA ATCC AAAACACGTTA TTTAGAGTA



CGGCTCTGCGATTAATGGAA GAAA AAATAAGAACAG CAAAGTC TTTCAGATAGAGCGCAG GGATTT TTT  
CTTGGGCTTT TTTCTAAA GTGCC CAAATCCATATGCTC TTTAGTTACC GAAATCT TTTCACAAATCGGATG  
GAGCATTG GAAATTC GCATACAGAAGAA GAGT AATTAGGGAAC TAGATATAACTAGTGGAC GAAT CAAA  
GT TTTCAGG GAAA GCCCTGAAGCCTGCAGTAATA GAA TTTC TCT CAAACTCTGCATG GAAAATAGTGTA  
TTGTCAAGCAATTGCAAC GAGT TGAGGGA GAATGAATCTGCT TTTA GAGAGA CAAAAGAGAGATAG TA  
AAGCAGA GAAA GCTGCAGAGGAGCTCCGGCAATCGCTGT TTTC CCTTCTCG GAAA GCATGTAGT GAAT GA  
T GAATAGAGGCG TAAA ATATAACCGCTAG GAAAAA TAAA GAAGAGAGC GAAATCC AAAAGCGAGAAA GAA  
GATAGCG TTTC CAGATAACCATATCTATGCATGCCCTTGAT TTTC AGTGTATATTCTCCAAGAAA AAATA  
AGCCATGAGAGGAGCTGTG GAAA GA GAAA CAGCATTACAGCT GAAA TT GGATGGATAGTATT TTTC CCTA  
CGATAAG GAAAATAAG ATTCAGTATAGG GAATAAGGCA TAAA TTAGCACGGGCTTGCG GAAA CGTGGCTT  
ATAAGTTCTTAGGGCTA ATCCAGA GAAA GTCATAGTACTACATAATAGGCCGATAGCA ATTC TACG GAGT  
A TTTC TGC TAAA TGCAAACGAGCATCTT GGAT TAACTG TTTC CAAGGCAAATAGTCTGTAC GAGT TTTC A  
TATACGA TTTC CCAGC GAATAGCGTGGCTGTAAT TTTC GGAAT AAG GAATTCATCC AGAGT TTTC TAGATA  
GA ACTC GTTGGGAT TAGATGTGCGAGCCTCT GAAAAGAGAGGGAT CAAAGAAA TGACTAGGACATT TTTC  
GCCTGAACAGAATC TTTATTCC ACATCAG GAATAATCGTCTCAAT GAAA CCAATATT GGAT ATCTCTTGAT  
TGTGT TTTAAAGCAATAATTACATTGTCAAATTTA CT TTTC CCACAGTGATCTATCGCAAT GAAT ATGCG  
ATCGT TTTC TTT TTTC TGCAAGG CAAA TAACAAAAGTGCCGG GGAT GTCATAGCGATA CAAA CGATTGCT  
TTCCCTTG CAAAAA GCGGCAAATCGAAGCTAACTC GGAACATGTATA GAAA TTGAAGCAACATAATACTC  
CTGAAGCAATCAAAAACAGGGAAGATAATC ATTCCTTGAGAAGCTCCAGAAGCT TTTAAA AAGGTAA CAAA  
GTTATTATCGGAGAG TTTAC GAAA TAAGG TAAA GGCCGAGATAAAA GCAAGATGCTGGGAGTATAAAA GGG  
AGGAGATAGGGAA CAAA GTAGGCAGTGACTTTAAA AACTGTGCATAAGGAACATC TTTAGCAATATAAC  
TGACAA TTTC TTGCAGAGA ACTGATGATA GAAA TGCAAGATTAGGCTAAGCGTACA GAAA ACTGTGGTT TT  
TAAA TAACG GAAA ATAAGAAC TTTC CATAGAATAGGCATGATG ATTC CGTAATA GAAA ATCAGTTGAACG  
TTTTA GCTAACAAA ACTATGCGCATA GAAA AATTGTG TAAA TCTGT GGATAGTTAAGAACGATGCTATGA  
TA ACCCG TTTACAAA GAATGATAAGCAATTAGAAGTTTTTT TTTC TTCTTTA GACAA GAAA AAAAAATA  
CTTGCTAGCTCTGTCTGGAGGTAGCG ATTC CAAA TT CAAAATGTACTTGCTTAAGTCTCGAGCCAT TTTC  
TTTA CTGCTGTGCATGTTGATTAT GGATGGCGAGAGACTTCTTATCAGGAAGCAAGTGATTTA GCTGCTT  
TA TGTGAACAAGAGCAG ATCCAT TTTA TTTA GATCGTCCGGAAGCTACAG ATCC TAT GGATTC TCGTGA  
TATAGAAATGCAGCGCAGCTATCGTTATGAAT TATTC TATCGTTATGCAA GAAA AGTGCT TTTC A  
GGGT TTTC TTGGT CATCATGCG GGATGACCAAGCAGAAAACG ATTC TAAAAC GGGTATTC GAAGGTGCC  
ATCTAGGGAATCT TAAA GAATGCTGACAGGTGATGTACAGAGACGTTGCCCTATTGCGTCC TTTA TT  
ACAC ATTC CTAAGCATAAGATTGTAGAAGCTCTTGATAGTCACCAAGTTCAATATGTTCAAGATATCACA  
AATTGTAATGAGCGATT CAAACGTCAC GAATGAGAGCGCTTA TTTCCTTA TTTA CAAGATGT TTTCG  
G GAAA AATATAAGGG ACCC CAAA TTTC ATTAGCAGGAG ATTC TGCGGAGCTGAGAGAATA CAAA GATCA  
GCAAACAGCTCCTTT CAAATTAC GAGTCGTTGATAATGAGAGAGG GAAA TTGTTACCTATAGAGCAAGAG  
TTAC TAAA AACACCGTT TTTAGCT TAAA TGGGTATGCAAACAGTT TTTC CTGAACGAAGGACTAGTTGCTT  
CAAAAAGTTTTTTA CAAACGG TTTA TGATCATCTTATGACAGGCTCTACAGCAAGATTACGGCTTCGTAA  
TCGAACAGT CAAA G TAAA AGCTAGGG GAGTAATCATA GAAA GTATATATTGATAGTGTT CAAA GGGCTTC  
CCTAGT GGGT TCAGCAGATTGCT GAAAGAAA AACACTTCTGTTT TTTATCTCTATAATTAGAGG TTTAT  
AAA CAAAATAA TAAA ATAT CAAA ATATATTGAATAATTATCTGCCTG CAAA ATTAGCATTGTAGT GAGTT  
TTA TGGC TAAAGATAAA AAAACAAATCCAGAATCC AAAAAAGT TTTC CTACTGCTTT TTTCTTTCTCTT  
GTTTCG GAGTGATT CAAA GCGTAGTCACAGTTCAAACCT TTTC TCTGC TAAA AAGGCTTCGGTAGGCTTC  
AGTCATCA ACTC GAACATCTTGTTAACCT GAAA TTACTCATTC CAGAAGAGAGT CGCAAGACTGCCTTGA  
ACGATAA TTTAGTGTCA TTTAGTGGTCG TTTC CGCGAGGTGGTCCCTGCTGAAGGTCAGGTTCCGGTATCA  
ATATCTTGATCTTATGAACGTAAGCATCAGATCGAC CAAA AGCTGGAAGAGGC GAGTAAGTC TTTA ACG  
GT TTTA TCAAAAAGAGTGCGTAATGCGATCACTGGT TTTC AGCTA TTTC TGGAA TGCCTATCC CTGAAG  
CAGGCTATACTA TTTC TCCTCGAAC GGATGTTGGGCTCTCTGT TTTA GAACC TTTAGTGGTTA CGGCCC  
TGTAGATGCTCAAATGTTGAACCTTGCTGCGCTA GAAA ATC GGGT GCGCTC CAAA CC TAAA TCTACAGAA  
AGTCTTAGAGTT CAAA GTTCGGAT CTCTATGCATTAATTGG GAAA TATCTTTTC CCAAGCTCTGGTATCG  
GGTCTGAATCCT TAAA AAAAGAAA TCAAAGA CAAA CATCAGCAAGTA GAAA ACTC CTTAACTCAGGTTAT  
AGAAGG GGATCAGGCTGTTGC CAAA TA TAAA ACTGTGCTTGAGACGTTGCATA GAA TTTC CTTAGCACTA  
G TTTC TCCTGAAGAAGGG ACTCG TTTC CATCAATTACGCTCTGTACGCTATATCGTGAAGA TTTC AACC  
GATGTGTCAAATTATTAAGGGAG GAGT GATGAG ACTC AAGTGCAGCTCGATAAGTTGAGAGGC GAAT TAGT

CCAAGCTG CAAA GTA TTTCAATAACCAAGAACTC TCTTCTCGAGC CAAAGAGAAA CAAG ATCC TGAAGTG  
TTTA GTCGTTGG CAAA AAGGCGC TAAA CAGGAAT GGCAGC ATTC TCTTCAAATAAA TC TTTA TCA TTTA  
GAGCTCCAGATCAACCGCGTAA TTTAGT TTTA GAGAAGAC TTTCA GAAGTGAAGAGCCAACGCCCTCATT  
CTC TGGTTA TTTA TTC ACT TTTA TGCCAATTAT CAAA GTTCTGCTG TTTA TCTAC TTTATCT TTTCTCGT  
CAGGTCAAAGGGAT GAACGGTCTGCTATGTCGTTCTG GAAA ATCTCCTGCGCGCTTGTAGCAAAGGAC  
AAAACAAGTAACT CAAA CGGAT GTAGCAGGGAT AGAGGAAGCCAAAGAAGAACTC GTTGAGATCGTAGA  
TTTC TTGAA GAATCC TAC TAAATTTA CTAG TTTA GGAGGGCGT ATCC TAAA GGAATTC TTTCTCATAGGA  
GCTCCAGGGACAGG GAAA ACATTGATAGCTAAGGCTGTCGCTGGTGAGGCTGATCGACC TTTCTTCTCCA  
TAGCCGGTCTGAT TTTCTGTT GAAA TG CAAA TTG GGGT TGGAGCAAGTA GAATCC GAGATATGTTTCGAGCA  
GGCGAAGCGTAATGCTCCTTGCATTATCTTCATTGAT GAAA TCGACGCAGTTGGAAGACATCGTGGTGCT  
GGTATTGGAGGTGGTCATGACGAGAGAGAGCAG ACTC TAAA CCAGCTGTTAGTA GAAA GGAT GGT CAAA  
GTACTAACGAAG GAGT ATCC TTATGGCTGCTACCAACCGGCC GGAT GT CAAA GACAAGGC CAAA TTGCG  
TCCAGGACGT CAAA ACCGTCGTGTTGTTGT GAAT CTTCCTGATA TAAA AGGTGCT CAAAAA TTC TCGCT  
GTCCACGCCAAACGCATTAAGCTAG ATCC TACTGTAGATCTTATGGCGGTTGCGCGTAGC ACTC CAGGAG  
CTTCAGGAGCTGA CAAAGAAA ATCTTCTTAAACGAAGCAGCATTATTGGCTGCTA GAAA AGATCGTACAGC  
GGTGACAGCAGTTGAAGTTGCAGAAGCTCGAGACAAGGTTCTGTATGG TAAA GAACGTCGTAG TTTA GAG  
AT GGAT GCTCAAGA GAAA AAAACAACGGCATAACCAG GAGT CAGGGCATGCTATTGTAGGGC CAAA TGTTG  
AGCATTCGGATCC TGTAGATAAGGTGACGATT ATTC CAAGAGGCTTATC TTTA GGAGCCACGCA TTTCTT  
TCCA GAAAAA TAAA TTAAGCTACTGGAAGAAA GAGC TTTA TGATCAGTTAGCGGTTCTTATGGGAGGC  
CGTGCTGCTGAACAGAT TTTCTCGGTGATG TTTCTAGTGGAGCGCAACAAGATATTGCTCAGGCAACAA  
AGATTGTACGGAGCATGACAAA GAAT GGGGAAT GAGCGATCA TTTA GGAAGTGTAGCTTATGACGAGCA  
TTCCGAAGCGGCTCCTACAGGATACGGATCC TACCAT GAAA AAAAAT TACTC TGAAGAGACGGCCAAAGTT  
ATTGATAATGAACT TAAA ACTCTATT GGAT GCTGCATATCAAAGAGC CAAAGACATCATCAACAGTCATA  
AAGAA GAGT TAGAGCTTATGACACAGATGTTGATA GAATTC GAGAC CAAAGATTC TAAAGATGT TAAAGA  
AATCATGGACC ATTC TTGGAT GCTGATAAGAAA CGGGCTCGTATGAAGGAAGAAGGCATGCTGTATAAG  
AAGAT TTTCTGAAGATCTTCCACCGCCGCTCCTCAA GAAA ATGTGCAAGATGGGAC GAGCAAAAAG TTTA  
ATACTAGCACATAACTTCCCTTCTGGAGG TTTA GGAGAGAGCCCT TTTATTAGGGCTCTCTTTTT CAAT  
GTGTGAG GAAA GCTAGCGTCTAAC TAAA TGTCTCTAAGTAAGGAT GCAAATAGGG GAAA TAGCGATT TTTCT  
AGTGTGAGAAGCTTAGTTACAAGACAA TAAA AAAGGCTAAGAAA AACCT TTTCTTAGCCTTGTT TTTCAA  
CGAATCGCCTATAGAAGACTAATCTTCCAGCGTTGCCTTATGGCTCAGCTTCAACTGGCCTT TTTCTGTTA  
ATGCTAAG GAG TTTA ACAGCAAGCTTGTCTCCTTC CAAA ACAAGTCAGAGATATTGTCTACTT CAAATT  
TAGACAATTCAGAAA TATGACAGAGCCCTTCT TTTCTCTGGGAGGACTTCTAC GAATACTC CAAATGTTGC  
GATAGATGTAACACGGCCATTAT TAAA CTTTACC GACTTCAACTTCTCCAGTTAATCC TTCGATAAGTTCT  
TTAGC CAAA TTAATCG ATTC TTGGGT GCTTGCTGCTATGTTAATGACGCCGTCATCATTGATGTCAACT  
GCGCACCAGAACGCTCGATAA CAAA AC GGACAAA TTTCTCTCCGGACCAATGACCGTTGCGATT CAAA  
GGTATTGATCTGCATAG TTTCAATGCGCGGAGCATA TTTAGAAA CAGTTCCTTAGGGGAGGCCAGA  
TGTGTACATAAGATTAA GGATATGACTACGCCCTG TTTAGCTTGGCTAGAGCTTGTCCATAATCTTAT  
GAGT GATTC CCTCTATCTTGAT ATCCA CAAAGAAA GCTGTAATACC TTTAGCTGTTCCGGCTAC TTTAAA  
GTCCATATCTCCTAGATGATCTTCTATGCCG GAAA TATCAGACAAGATGATGGCTTGATCTCGATCTAAG  
ATTAAGCCCATAGCAATACCTGCCACGGGAGC CAAA ATAGGA ACTC CTGCATCC AT GAGTGCAAGACAGC  
CTCCACATACGGAT GCCATGGAGGAAG ATCC ATTAG ACTC AGTAATATTAGATTC TAGGCGAAT GATATA  
AGG GAAT CGTGATGTC CAGGAAGAACATGACT TAAA GC TTTCTCAGCTAA TTTCCATGTCCAA TTTCA  
CGTCTTCTGGGGAACCA ATTC TGCCAACTTCTCTACGGAGAAA GGAGGGAA GAAA TACTGTAGATAGA  
AGCGAGCGGCTCCATCTCC ATTC AGATCTTC GAAT CGCTGCGCCATAT TTTCCCTCCAAGCGTACATAC  
GGCCATGC CAAA CGTCTCTCCGC GAG TAAA TAAGCAACTTCCGTGTGTTCTTGGAAAGCAAAG GAGT CTCT  
ATGGAAA TGGGGC GAAT CTCTGTGGTGGTTTCGTCATCTACAC GAAT ACCAAGATCTT GGATAAGAGCTC  
GCACAAA ATTAGAT CAAA CTGTCT TAAA TGCAGCCTTAACGTTCAACAAA GAAA AATCACTGT TTTCTTCT  
TTGAACCAAGTTAGCAATAAC GGATTC CTCTAATTC TTTCTGAGGCTTGCTCTAGAGCTTCT TTTA TCTCTA  
AAAGACAATGCTT TTTCTGAAT TTTCTCTAA TAAA ATCT GAAA CTACAT CAAA TACGTCTTCTGGCATAT  
CAAGAACGGCAGAGAAGTTCT CAAACAAA CCGATAGC TTTCTGCCATGCTTCAATAGCATCGCATAT TTT  
AGCTATATAGG CAAA CCAAAAGCAATAGCTTCTAGA ACTTGCTCTTCTGT TAAA AAGTCGCAATGTCCT  
TCAATCAT TAAA ACTGCAGAAGCTGTTCTGCCATGACGAG ATCC AGCTTGGAGGCACTTAACTC ATCTC  
TGGTT GGGT TAAATG ACCCAC TTTCTCTCCGACGAGCCCAACGCGTAC ACCCGCAATGATACAAT CAAA AGG

AACCTCTGAGATAGCTAAAGCGGCAGAAGCTCCGCAAATAGCTAGAGGATCAGGTAAAGTTTTC CCGTGC  
TAAGACCAAACGTAGGACAAGACTTGAATATCTTGCATGAGTCTATTAGGAAACGACGGACGCAAAGAGC  
GATCTATTAGCCGAGAAACAAGAAATTTCTCTCTCGGAAGGCCGTCCTTACGTTTAGAAATCC TCCAGA  
GGTCTTCTGCGGAGGAAAACCTCTCTTGATAGTCTACTCTGAAAGGCAGAAACCGACAGCCTCTGAC  
AAGGAGGCTGCACACGCTGAAAGAAAACCCAAAGTCTCGTTCATCAAAACGAGAACAGCCCCACTGGCCT  
GGCGAGCTATTTTCCTGTCTCGAAAATTAATGTTTTATC CAAATCTAACGCAACA GAAAAAGTCTCAA  
AGCCATGGAGTTGTCC TAAAAACGAAAAGGGTACTATTTTCTCAAATTGAGGCGAGCAAT TAAATTTT  
ATATCTTTTCAGTATCAGTAGAATTTAAGTACTCTAGGAGCTTTTCTCTGCCCCTACTAATTTTAGCAA  
GCTAGACGAGAATCAAAATCTTTTAGGAGATCTTTTAGGTGCTCCTT GAGTTCCGTTATGTGCTCAGTCA  
GAATAGCAATCTGCACATCTGCCGAACCTGTGTCTTTTTCATGAAGTTGAAATTTTTTAGTAAATTTTC TTC  
TTTAGTGCCCTTATCCAAAGACATTCGATGTCTCCTTAAATACAAAAAATGCCGTAATGACCAATTATAC  
CTAAGAGGCAAAATTAATGTACATCTCAAACTAGAGTAAGAAGTTTTTTTCTCTGTGCAGAGAAA TATAA  
GATGTCGATTAGGTACCAATAGTATGTTATGAGGGGTTCAAAATTTAGAAAAAATCAAATAATTC TTA  
ATGCAA GAAAACCTTTTTTATC GGGT TATAGCTAATTTTATGTGTATA GAAAAGA TTTATT TTTTCATGA  
AGAAGGCTCTAGATGAGGCTAGGAAGGCATATGAACAAGATGAAGTCCCTGTTGGTTGTATCATCGTTCA  
TGGAGATAAGATCATCGCTAGAGGACATAATAGTGTGAGCAAT TAAAAGATCC GACAGCACATGCT GAA  
ATGACAAA TATTAGTGCAGCAGCA GAATATCTAGAGAAT TGGAGATTGAAA GACACGATCC TCTACTGTA  
CTTTAGAGCCCTGTCTCATGTGTGCTGGAGCGATT CAGTTAGCACGTAATTCCTAGAAATGCAAA GGGGC  
CCCTGACAAACGTTTAGGAGCTGGAGGGAGTTGGT TAAATGTTTTTTTAGAAAAACATCCTTTTCATCAA  
GTAGAGTGTGTTCTGGTGCAAAATACCAAGAGTCTGAGCAGTTAATGAAAAACTTTTTTTTAGAGAAGA  
GAAA GGCTAAGGATGAAGGAAGAAA TTC TCGCGCTACTTGTATCA TTTATATACGGAGCAGGAAA GACGAT  
TAATGTCGCTAGGGACGACGATTGTTCC TGGATGAC GAAA GAGGATCTTTTACAGCCTATGGATTATGA  
TGA ACTTGAGGAGAAACCTTCTTTTAGA CAAAAGAAGGAGTCAAA AATGGAATAGGAGAGACTC GAGCC  
GCATTATATTC TTTTTTTTCTGATCTAGAAGACTCCTCAAA CGTG GAGTCTTCTAGCGATACGAGCCTCT  
GTAAGGAT TAGGAATATTTTTTTTAGCAAAAACATATTGCCAAAGCCATAGACAGTACCGAACCAAGT  
AGGAT TGCATAGGCGCCGGACAGAAT CAGAAT TAGGAAGTAGAAA TGGAGGAGTAGAACAAAGCTCCAT T  
TTC TAGA TAAAGAGATAGGGAAAAGAGGAGTGT CAGTCTTTTTTTCTGGATCTAG GAAAACGCGACAAT  
CAAAAGAGCGCAGAT TAAACTTTCTGGTCCGAAGAAA GCTTGGGTGCTTCCAATTAACCATAGAAA GGCC  
CAAATGCTGATACCTGCAATACTGACTTGGGTAGT GAGTAAAACACAAAGCTACCTGTTCCGAGTTTCC  
GAATAATTACATCTGTTGCTTTTATAAAAGAGGATGAAATCCAAAACATTC CGCATGAGTAGGCGTTGCGT  
GATCTCAAGGCTGCGAAGATCC CCCAGCTTTAAGGTATCTGCTGTTACGAGAGGATAGGTGAGCCATTGC  
CAAAAATAATGTTGATGAATTCCTTTTACAGAGAGCGGAGCCATTC TATAGGCCACGCACTT GAAAAA  
AATACTGTAAGAAA AATGCGATGAAA GGAGCGGAGCAAGAAGTTACTAGTACTAGAAGGGGAAGCTGTTT  
TAGGGCTTTCCCAAAAAGGGAGCAAACAAA TACTTATCGGGAAAGATAACTCTCATGAAGGAGAGGCCCT  
TTTTA CAAAAGTGTGATGATTGGCTCTATTATCTAGGCTCTGTTCAAAGCTGTCAACCTTCTCTCAAATC  
TCGCAAGGCAAAATTA CAAAGGTGCATAGGAAAACCTGTGCACCC CAAGATATTAGTCCGAAGGAGACGTT  
GTAAGGCAAACTTTAATCGTTAGATCGATGAGAGAGGTAAGGAGCGCG GAAACTGCTTGAA GAATTTTCA  
TAGATTC TGTGGATGTGGCGTTCACCGATTCAAAGTTAGCTTGAGCACGTTGTTGAGCTGCGGACAGTTC  
CTGTTGGATGAGT TCTCTA CAAACTGTAATCTGTTGGTTCGATG CAAAAAAGCCTGAATAGTGTGTGA  
TTCGTGTATTCGTGTCAGAGCCATTTTT CAAAATTAGGTCAGGAACATATAACAAGGGGATGTTGATTA  
GTTCCAAAGTTTTTCCAAATGTTCCAGCGTATTTTCTTGTAAAGACAGCCATAATAGCATGGCTGTAATC  
TGTCGTTGCGACGGAGAGTTTCAGCATGACTGCAATGCAGAAA TACATAGCAGACTTCAAATTAATCTCT  
ATGGATGTAGGCTCTATTAGAGTAGAGTCTGGTATGACAGTATTTTTTTTCAGGAA GAGTGGGGATGATTG  
CACTACTCATTGGATACCCCTTTTAGATATTCGCGATCAAGCTAACGA CAAATGAGAACG CAAAATGAG  
CGCTGACCGACTGTAGGGACTGTTGAATAATATTAATATTCGTGTTCAAGTTACTG GAAATCACTTGA  
GAAGCA TTTCCAAGACCAGATA CAAAGT CAAAATCGCTTGTCTAGATGCTCCGACTGCTTGGTTAACCG  
ATTGTACGT CAAATAAA TAAGAGGAGT CAAAAGAGTTTACTTGGTTT CAAAGAATGGTAGTGTATTGGTA  
TAGCGCTTCTTCAATTGTTCCAGGAATG CAAACGCGGCAGCATTAGCTTGCAATTGCTCTGCAACTAGAGAC  
AAGTTAT CAAACGCGACGAGAACAGACTGG TAAA TGTAG TAAA CAGTAACGATGAGA GGGTTAGAATCCT  
TAGCAAATCGTGTTATAATCTCATCAGCCGTTGCA GAGTTCGTTGTTCCCTGTAACCGGAGGTGTTTCAGC  
TAGCTGTAATACAGCATA CATTGGTTC TTTATGCCACATACTTCTGCCTCGAAT TAGTTTC TTTGGGTAA  
GACAG GGGTTTATTTAATTGGTTAACTGTGCTTCCACG GAGT TCAATGT CAAAATGAAGGAGGAGT TCT  
GTTGAGCGA CAAACTGCATAATGTTGATG CAAATAGATGCGTGAGAGA GGATAATCTGTCCAT CAAATCG

GGCAGTTACTAATTGGTCTTGGATA CAAAAGCGTTGTGCAGAATAGT CAAA GTTCTGGT CAAA TACTCGT  
GTGA TTTCGTCTTC TTAGCTCCAGAGCCAACGACAGCGTA CAAA CAAAATTCG TTCTTTGG TTAAATT  
GCTGTTGGATATTAGTATTGTCTG TTAGCTGCTTAGATTGCGTGAGAATCGTCTCTTGACGTA TTTC TAC  
AGCTTC TAAAAGAAGA GAGTAAA TGCTGAACAA GAGT TCTGCTATTGGAGGCGTCCCAAAGGCTC TAAA  
GGAGGTAGCGAGGAGACGTATTGTGTGTCTCCTACCTGTGAGGTGGTGCTGACAT ATTC TAAA AAATTT  
T CAAA GTT TTTA TTT TTTA TTTA CCAGCAA TTTC TCTC TTTA TAAA AATAATAA CAAAT TTTAAA AAT  
AAGCCGCTTATTTA AGCCTC TTTC TTTAAGTGCTAACAGCCTTGAGAGAG GGGT ATAGGCT TTTC TTCT  
GTTCAAATC GGATA CAAA GACAGCCC GCG ATTC TTCCC TAAAAA GGAT CAAA GAAG GAAT TAGCGGAGGA  
AGGTTACATATTATTAATCAAGTG TTAAAGGTT TTTC GCAGAAGGCTGCGA GAAA TG TTTAAAT GAAA CC  
TGT TTTC CAATGAGGGGGCTGTGTGGCA GAAACTC AAGACTGCGAGCGATT GGAT TT TTTAAA TGGTGAT  
GATATTAGTGCTTATGTAGTGCTAAC TTGTGGGCA ACCCTCGGCTGAAGG GAAA AT GAATGTGAGATGG  
TGTATGAAGGGGAT CGA GAAT TGGTTAGCTT CAAA TTAACCAAAGCGTTAGCTTC CAAA GAGCAGCCC TA  
AA CAAAAAAGAGGGGT TCTAATGGGATTC GGAAGTGTGAGAGG GAAA GAAA AGCTGTGAAGTCC TTCTTC  
CTAAGGCCTCTACA GAAT CTTGAAGTAGGGCTCT TTTC ATTACCTATAGTGTATTGTTGGGGGAGATTG  
GGTGTGTATCTTCAATCTCTTCCG TTCTTTA GTAGCTGT TTTA AGTATTGTAGGCGT TTTC GTTGTCT  
AG TTTC CTCTTCCGTAGTTGGGGCTATGGGCTCTCTGTTGTAGGGGCTATATT TTTC GGGCTGGCTCA  
AA TAACAA TTTC CCTGTGTCTGTTT CAAAGGGA GGAT TGTTAACTGTCTCT TTTA TTATTTTC TTATGGGA  
TTC TTCTGCTGAGT GTGTC CAAA GTTGAAGGACATATTAAGGAGAAGGCTGTATC TTTATCAGAGCTGAC  
GGCATCGACAATTC CCTTCAAGACTC CTATAACCGCAAGTGAAGAAC CAAA GAAA AGGAGCTTCTT  
GCCCA GAGTAAGATAACTGC TTTA GAACAAGAGC TTTC TGTTTC GCATGAGCAACTC CAAGAGG TTTC CA  
GGAAA TATACGCATACAAGTGAAGA TTTA CAGATTCT TATTGATCAGAGGGATAGCTGGTTAAAAGATTA  
CATGACTCTCCATCAA GAGTATGTGCGTGTAGTTGCTGGAGATGAAGAGAATGTCAT TTTC CCTTG GAAA  
GTC TTTCAGGGTAATTCT GAAA AGGATTC TGGTTATCAGCAGC GGGT TCAGGATGCTGAACATAAGATCG  
CTCA TTTAGAGAAGCTCTGTGAAGAG GAAA ATAGCGGAAGCGCTATGCTGAG GAGT GCTTGGATAAGGC  
CTTAGCAGATTTA TTAGAGTCTACTC GGCTTAGG GAAA TTC TAGA GAAA GAGATCTTCCAAAAGGATGAG  
GAGATCGCATC CAAAAA CAAGAGATTGCAGCG GAAA AGCT CAAA AGTCTTCCGTCAGTGATGACAGAG  
CGCTTATAAGGGT AAGTACCTGCAATTAAGGGAGCAG TTTA CGGTTAAGGATTC TTTC T GAAA AAAGC  
TAGACGGAACGCTTCTTAGCTCAAGAGCAACT TTTA GT CAAA AAGCGAGC TAAA GAAGAAGAAGCCTTG  
AACAAA TCTACAAC GGATAGTT TTTC TATTATTC AAAATCT CAAA CTACA AATTGAGGC ACTAGAAGAAG  
AAGTTACTTATCTAGAAGAGT TAGTACTTCAACAACGAATCGGTAATCAGAATAGCATGTTCCCATTTGT  
GCACTAGGCTGGTGCATGTTCGTGCCTCCAATGG TTTA TTGGGTCAATAAA CCTTTC TTCTTTTC  
CGACATTGATCATAGGCTCGATAGTGAAGATC ATTC CAGGTGCTAGAG GGAT TTTA CAAGAG TTTC TATG  
GTGTGCCACAAA GGAT TTTC AT GAAA CTGACTC CCACTC CGTGTCCAACAACTGGTCAACAACAGAG  
AAGCCATA TTTA GCTGCACAAT TTTC AATCACTTCGCCAATTTTC ATACAGAGGAAGGTTAGGTTGAGAA  
TAGAGATAGCAGCATTAAAGAGCTTCTAGAGAAGCTTACAGACT TTTC T CAAA ATCTCAGAGACTTCTCC  
AATCATCACC ATTC GGCTGCAATCTCCATAGAATCC ATCGACAATGCAG GAAA CATCAATGTTCATAATG  
TCCCAT CAAA TAACG GGATATCATTTGG GGATTC CGTGGCAAATGACTTCA TTTA GTGATGTACAGATTG  
TT CAAAGAAAAGGC GGATGGCCATAATTAAGAGGAGCTG GAAT GGCATTATGGCG TTTATGTA ACTC TCG  
AGAGAGAAGATCTAGTTTCG CAAA TAGTT ACCC CTTCCTTAGCAGCTTCGCA TAAA GCATCGA GAAT ATGA  
GCTGTAAC TTGGCAAGC TTTA C GAAT CT TTTC TATCTGTTCTGGCGT CAAA ATAATGATATCATAACGAG  
AGGCG TAAA GTTGTCTG TAAATTATCAAGGGGACGTTCTGG TTTA GTT GGGT AATGGCAGTG TTTC CATT  
CAAA TTACTGCCGCACCAGCAA GGAT CG TTTC TTTC ATAAAAGGAACCCAAA GAGT GATTTTC TGATTTTC  
CCTATCTCTTGACATAGAGAAGAGC TTTAAGGTGTAACATATAAT ACCCTATATT GAAA GCCGTA GAAA G  
AGCT TTTA ACATAAGATTGCCCGCCATCAAAGCCAACTAATAACCAATAATCGTTCCAAAGCTAACAGT  
CCCA CAAA GCCAAATAAGCGATTGATAGAGCTA GAAA AGAGAAGCGTGATCAGAGA GAAT AGCCAAGCAA  
GCACAATAGCTCCAGAACGA TTTC T CAAAG GAAA ATACCTTCTCCATATGGCC TAAA GTGATGTAAT  
CATTGCTGGGCTGTGATAACAGG GAAA GCCAGAGGGAA GAAA AC GGGTTCGTC TTTA TCTTTTC TC TAAA  
G TTTC TGATTGAGAAGGAAGTGCC TTCATCATATCAATGGCTATGGAGCCAAGCAGTAGGCCTCTGT TAA  
ATT GAAA AGCAGG TAAA GTGATCC CTAGTAAGCG GAAA AAGCCTCGACCAAAGTAAC GAAT AGTAGCAG  
CAAGAGCAGTGC GAAA ATAGATTC TCG TAAA ATGATGCGTTGCTGTTT CAAAAAGAAA AATTT TTTAAT  
AATGCAA TAAA AACGGGAAGAGAGCCCAAAGCAT TAAA AAGAGCA TAAA AAAG TAAA GTAAGAC GAAA TA  
GT GAAT GTAGCA TAAA TACACGTGC TTTC TTATAG GAAA G CAAA TTGTAGGCCAGATACCAGAAGTTGAG  
CGCTACAATCACGACAGCTAGGCCTAGGATGG CAAA TGTTGCGATGATCG CAAA CGAGCCGGCCTT ATT

CGCTG CAAA AAGAACAATTGTGGTTATTGTCATCATTAGCCAGGATAGACACAGCAGCGCACAAACAATG  
GAAA AAGGAAGTTGCTGCATAGCTAAGGGGCGCAAGCACATAGCCATGAAGGCCGATCATGAGAGGAA  
GGGCTATGGGAGCTACTTTTAGGTGACTGGATAACGAAGGAATTTTACTCCAAAGGGATGCTTGAGTATT  
CCGAA GAATAGCCCGCATTCCTGTGAACATAACCC CAC ACCCTCCGACAACAGTAGCTGCGCATGCTGGT  
G CAAA CAAAGAGTAAA GGAGCCCTGATAATAGAGGATAAAGAACAAG ACCCGAGAAGAGCAAAAAGAC  
TTTC CCTCAAGAGAAGCAGCGC CAAA CTTCTTTTAGATAAAATTACCTAGGATTTGTATTAAGAACC  
ATTAGTCGTAGAGTCTGCTGCTAAA AA TAAA ATACAGC CAAA AGACAACAAAAAATGACCAGTCCATG  
AGACG CAAATAAA GAGGTTGGTGGTTATATATT GAAA GAAGGGATCTTTTCAGTCC CAAA TAACTGAGGGA  
TCCCGAAA TCGTCACACAGAAGTGTAGTTCAAATGAGATTTTAGT GAAA CCTAATAATCAACGA GAAA G  
AGCAACATT CAAA TTGACTAACGA ACTC GTAGTGT GAAA CAAAGAGGTTGAGT TAGGAAGAAGCTATTG  
TCTCAGATGCATCACTAATCAAGG TTTC AATA GAAA AAGTATCGATGGAAGCTTGCAGATCAGGGCAAGT  
TGTAGACAATGTTAC GAGTAGAGATTCTAGCAATTC TCGTGA TAAA GGTTTCT GAGT CAAA GCCAACAA  
GGAA GGGTAACTTCCATTGAGCCTGCTCATC GGATAACAC TTTAGGAGAGTCTTTTAGTTCGCTTCTACGT  
AGATAGC GAAA GCCTCTTGG GGATATTCACGAC GAAA TCC AAACTGCGAGATAAA GCTT CAAA CAAGCC  
AAAGAGT G CAAA AGGTGTCATCGCTGGAG ACCCTTT TTTCCCGCAAATAAGGAGCTGCGGGCCTGTAGGG  
GATCCATAAGTGTCA GAAAGAAA ACAACCGGTAG GGGTTCCCTTTTAGGCGATAGTGACGCCCTCAACAT  
TG TAAA AACCTCCATACAAGAAA TCAA CAAA ATAAGT GAGCATAGGA GAAA TCATATCTGCGCTGACGTT  
CAAAA TTTCTGAAGGAACCACATGATGCTTGGC TAAA GCCTCTAGCAGATTAGGCAGGTTCTTGGAGTCA  
TTGAGGCAAAGCCTAGTACGCGTCCGTTAAGATCTTCAAGTT TTTCAACGCCCTTCATTTT TTTCTATAGA  
TCAGACCTTGCAAGGAGCTGTGCGATAAGTCTGCCTGCTACTTGAACAGGAGCTCCTCGAAGTGCAGT TTT  
CAAT ACCCTAAGCTGTGG TAAA GCGTGTAACTTAC TTTCTCAAGAAGCAGATGAG GAATAGAAGAACAA  
GTATCCGTATTTT CAAA TAAGGTTAAG GAAATCC CTTTCATCTACAAAAATCC TT TTTCTACACCTACAT  
AGAGGG GAATGTGATTAGGATTCG GAGTCCAATCC AAGAGTAGAG TAAAGGATTTAGTAGGGACGGGAGC  
GGCTAAT CAAA GATCGTCT TTTAAGTAGAAA AGACAGGGCAATACAGTAATTG GAAT TAGAGCAAAG ACC  
CATTT TTTCCAAAAGATCT CAAA GAAGTTT TTTCCATTCTAAAGAAA AAAAAAGTGTGCGCTCAAGAA  
GTAAA ACCTATAAAA ACAGACTTAGAGT CAGCACGGTTAGGACAAA TAAACCC GCTAGAGCCATTGCCAT  
GTCATAG TTTCTGCGGC TTTCCAGAATAAGAATACCTAGACCAGATTGTGTTGCA ACCCATTC TCCAGCA  
ATGGTCGCAAATCC TCGGCACTCATAGCAAT TTTAAGCCAGAGAAA ATATGTGGCAGACCGTTAGGAA  
TTCTTAATTTTAAA GAGTTTCTGCCAAGTAGTTGCTTGG TAAAGAG TAAA TTGTTCTAAGAGTTCTCAGG  
AGAAT TTTTAATTC CCTGATGAATGGTCAGAGC TAAA GGGAAA AAGATGCTAAGAGCTGTTGGGATGATT  
ACTGCTCTTGTCCCCAACCAACCAAGAACGAT TAAA GGGGCTA GAGTGAACATAGGAAGGCATTGCA  
CCAGAACACACAAG GGGT GCAACAAGCCTT GAGTAGAAG GAAA TAGAAGCATGGTAGCA GAAA AGAGGAT  
AGCAAGTAGTAATGC TAAA AAGAATCC TCC TAAA ATGCCTTGGGCTGTATAGCAA GAATGCTGGAATAGT  
ACCGG GAAA GAATGGATCCCTGTGCTAAGTACCTTCGATGGAGGAGGCATA TAAA GCCAAAACCTCGGAT  
AGT CAAA AGCACAAA ACTCCAGAGT CCAATCAAGGGAAGGATGAT GAGTAAA TAGCTAATAAA TTT TTT  
CATAAA AATAGAAA AAACGACTTCATGAAGGAA GAAT CATAGGGGAAGAGAGCATATGCGGCAAGAGAAT  
GATAGCTTAGGAAT TGTGTTGGTTCCGAAGACAACTA CAAA GAGCTCAGACGGGACGTTCCGAAGAGT  
T TTTCTCTTATGG TAAA GAATCTATGCCTCTT GAGATT ATCCATGCATTAG TAAA AAT TAAA AATGTGC  
TGCTAAGGCGAACGGAGACTTG GGGT GCTTAGATGC TAAACGCAG GGATATGATTGTTGCTGCTACAGAT  
GAAA TTC TCTCCGGAGAA CAAA ATGAACACTTCC TTTAAAGG CAAA GCAGACAGGAAGCGGC ACTCAA  
GCAATAT GAATGTCAATGAGGTGATTGCTAA TTTAGCAATTCAGCGTCATGGGGGAGAGCTTGGAAGTAA  
ACATCCCGTGCATCC CAATGATCACGTGAATAAA CCCAGTCTCAAATGATGT TTTCCCAACGGCAATGC  
ATATAGCTGCGGTACAAAGTA TAAA AGGATC TTTAATTCGGGTATTGGAACATTTAAA AAAAGTTGTTGA  
TGCTAAA GC TTTAGAGCAA ACTCGAGATA TAAA AATTGGAAGAACGCA CAAA ATGGATGTAGTTCCAATG  
ACTCTTGGGCAAAA GAGTTTCTTGGGTATAGTTGTCAGTTGCATAATTG TTTA GAGCGGATAGGATTTTC  
TTTA ACTCACCTCTAT GAGTTGGCTATTGGAGGGACTGCTATTGGAACA GGGT TAAA TGTTCCTGAAGGA  
CAAA TAGAGAAGGTGATTCAGTA CAAA AGGAGGGAGACAGGAGAGCCC CAAA TCCAGCTTCGAAC TACC  
AAA CTGCGTTATC GAATCATGATGC CAAAGTGCAAGCTCAC GGATCATTGACTGTGTTAGCTTGTGC CAA  
AGT TAAA ATTGCTACAGATCTAAGTTT CAAA GGGT CAGGACCTCGTTGT GGATTAGGG GAAA TTTCTTT  
CCGGAGAACGAGCCA GGATCTTCGATCATGCCTGG GAAA ATTAACC GACGCAAAGCGAAGC TTTA CAGA  
TGG CAAA TTCTCAAGTAATCGGGAACAACCAGTCCATTATTT TTTCTGGAACAAAAGGGA ACTTCGAAC  
GAATGTCAT GAAA CCCGTCATTATCTATGAT TTTCTACAGTCAGTGA ACTTATTAGCTGGTGTATGAGA  
TCG CAAA CAGATTGT CAAACAAA CGGACTCAAG TAAA TAAGGGCAACTACAGCAAATGTAGAAA GAT

C C A A A A T G T T G G T A A C G G C G T T A G C T C C C A T C A A A G G G T A C G A T A A A T G T T C A A A G A T T G C C A A A A A G C  
T T T T C A T G A A A A C A A A A G T C T T A A A G A A G C G T G T G T C T C T T T A G G C T T C A A A T C T G A A A A G A G C A A A A T  
G A G C A T G T A A T T C C A G G A T T G A T G G T A G G G A A C A G A G G A C A C G A A T A G A T A C G A G A A C A A G T A T G T C G C C  
C G C C C A A G T A A T T C A A C A C G G G G C G G G A G A A G A T C A G A G A C T T G T T T A T A C A A G A C A T C T A T T G A G A A G  
A C T T A C T C T C T A A C T T A A T A A G G G C T C A A A C A A A C A A T A A C G C A C C T T T A A T G C A A A A G A A G A T A T G G T C  
T A C T C C G A T C A A T T C A T C T A C A T G G T A C C T T C T C A A A T C A C T G A G A G G A G T T T T T T C A C G C C A G C T A A G  
A G A A G C A A T G T T C C T T G T C G G T C G C A T T C C A A G A A G A A C T C T T C T A G A G C G T G C A T G G C A G A T G C A T C T A  
T T G T A G G C A C T C G A G T C A T G C A A A G G A T A A A T A T T T T A G G C G G C T T T T C T A T T T C A T T T A A T A A G T T T T  
C A A A C G A T C T G C G A T G C C A A A G A A A A C G G T C C G T T G A T T T C A T A A A T T T C G T A A A A G G T G G T A C T T C A  
T T C A A A C T A A A T A G C A A G T C A T C A A A A G G T T G T T C G G A T T C A T C A A A A T A T C A A A C T G T G G A G A T A A C A T  
C A G A T A G A T C G C T C A C A A T T T C A T G A A T A G A A A G G C T G C A A G C A T C A T G C C T A C T T G T A C T G C A G A A G T  
A A T C G T A G T C A T T A C T G T A A G A A T G A A C A C G G T T A G C A G G A C A A G A A C G T C T T T T T T A G G A G C T G T G A A T  
A G A T G A A T G A A A T G G T G A A T T T C A C T C A T A T T C C A A G C A A T T A A A A T T A A A A C A G C T G C T A G A C A T G T T A  
G A G G G A T T T T A A T A G T T A A G G G A G C T A G G A G T A G T A G G A T A A A G A A A G A C A G A T G G C A T G G A T T A T T C C  
T G C T A T A G G A G T A C T A G C G C C G C A C T T G A T G C T A G C C G T T G T T C T T G A A A G C G A G C C T G T A A C A G G C A T G  
C C A G C A A A T A A A G A G G T T C C A A T G T T A G C A A T T C C T T G G C C A A T T A A T T G G C A G C A A A A T T G A T G T C T C C  
A C C C A G T C A T T C C A T C T G C A A C G A C A G C T G C T A A T A A G G T T T C T A T T C C A G A A A G A A C G G A A A T A G T T A A  
A G C A T C T G G C A T A A G T T G A A G C A T T T T A G T A A T G C T T A T G T G T G G G A A A A C T G G A C C A G G T A A A A G A G C T T  
G G T A A G G T A C C A T A A C G G C T A C C G A T G G T A G G G A T G T C T A T T T T A G A A T C C A T A C T A G A G T C G A T G C A A  
T G A T A A T A G A A A T C A T T A C G C C G G A T A A C G A G G C A A A T A A T T G C G A A A G T A G A T C A T T A G A A G C A G G G T  
A A A T A A A C C C A C A G C A A A G G T C T T G C T A T C C C A G G T C C A T A G G T A A T C C C A A T A G G C T G C C C A C A A C C G  
A T G A A A T C T A A A G G A A C T C C A T C T C C C A C A A A A G C C C A A G A A A A T C T C G G A C A A A G G A A G A A A A A T G A  
T G A C C G C A A T T C C C G T A G T T A G T C C G G T C A C C A C A G G A T A C G G C A T A T A T T T A A T A A A A G T G C C T A G T C C  
G G C A A G A C C A A A G A T A A C G A G G A A G A T C C C A G C C A T C A A T G T G A T A G T A A A C A G T C C G T C T T C G C C A T A C  
A A A A C A C C G A T A C A G T A A A G G A T G G A G A T A A A G G A A C T G G T A G G G C C A G A G A T T A A T A C A C G A C T G C C T C  
C T A A G G C A G A G G C T A A A A A G C C T C C A A T A A T T G A G G C C A A T A G T C C T T G T A A A G G A G A C A C T C C A A T C C C  
G A T C G C A A T A G C A A T A G C T A A A G G G A A G G C T A G A A T C C C T G C A G T G A T C C C T G C G G T A A A G T C T T T C A A A  
A G C G T A T T A A A A G A A T A C C C T T C T T T T A A G C A G G T A A C T A A T T T A G G G A T A A G A T G C A A A A A G G A T A G G G  
A A A C T T T C A C C A A A G C C T C T G C T G G T T C G A A A A A G A T G G T T T T C T T T T T A T A A T A G A A G G A A T T T A T C C  
A A C G A G A A G A G A G G T G A G A A A C T C T C T T G G T A G G A C A G C C C T T C T A T T T T T A T C G C G A A T A G A A A C G C A A  
G C T T A G T C T A C A A A T A A A G T G G T G T T A G C G T T T T T C A T C A C C A A T T C G C G A T C G G C A A A T C T A G T C A G C G  
A G T G G G A T G A C T A A A C A C A G G C T A T T G T T A T C C T T A A G A G G A G G G G T G A T A T A A T T G C A C T C C C C G A G  
T C T C T T G G T A C C A A C A A A A G T G A G A A C A C T T T C G A T G A A A A A G A G T T T C T A T G C A A C A G T C A A A C G G A C G  
A G T T G A A C G G A T A A G A T A G A G C T A T T A C A G A G A G A T T T T T A G A T A A G A A A A C A T T T T T A A G A A G G T T T  
T T A T C A C T A T T T T A C A A A A A T C T G T T A T C C A A A G T G G T G G A G G A T A G T T T C T T T T T A T T A A G G A T C G G  
A G G G T T T T C A C T G T A G A G T T G A A A A C T G T T C A A A T G T A A G A T G A T C T A G G T C C A A A T A A G C T T G T C T C A A  
A G A T A G C G C C T T C T C A A A A A G G G T T T C C T A T A C T A A G A A C T C G G A G A T G A G T C C A G G A T C T G T G T A T A A G  
G T T G G A T T C T A A C T G T C T G T A C A T C A G C G T A T A T A C G C A A A G T C T T G T G T T T T C T C G T A A T T A T T C A A A C  
C T A A G C T T C T G C G G G C T C T T G G T G T T C T G A A T A A A G T C C T C A G A G T A A G G T G C T T G T C G A G G G T C T T A T G  
T T A A A G T T C C A G T T A T G C A A A T T A T T T C T G T T C G G A T A T C T C G C G A T C G T T C A A A A C A T A T T G T T C G A G  
T A A A C A A G T C T G C C G T A T C T C T T G C T A T G G G A G G C T T G A T G T G G T T A G C A A A T T T T C C C A T A T A C C G C A  
C A T T G A T C A C G T C A T G A T G G T C G A A G A A T T G C A G A C A T G G C A C A A G T C A T T T T C T T C T T A C A A A C T G C G  
A T G G C A A T T G T G G A A C T C A T C G A T G C T C A T A G A G G A T T T T C T A T T G T A G T G C G T T G T T G T A A T G T T G A A T  
C C A G A A G C G T G C T G C C A A G G T A T T A C T T A T C C T T T C T T T T T T C C T T C C G C A G C C T T A G A T A A C C T G A C  
A T C C A T T A T T A T T A T T A T T T C T A T T C T A A A G C G T C T G G T G A A A G C T C G A G A G G A T C G G C T G C T A C T A G G A  
G C T C T A T G C G T G A T T G G A T A A A C G C A G G A G A C T T G G A C C C T T T A G G G G A T G T G A C T A C G A C T A T G C  
C A A A G A T T A A C G A T A A G A T T T C T A C G T C G G G T A T T A T A C T A C G C T A T T T C T T C C T A G T G T T G T C T G T G T  
A G T G A T C G C A G G A A T C T G T G G G C A A T T A T T A C T A A A A A A C G T C G T T G T T C A G G A T T G T C A G A G G A C A A A  
G A T A G A G A A C C G G C G C T C C C T A A G A G T A A C C T G A T T G C C T G T G T T G G C C A A A G T T C C A A A C T C A T G G T T C  
C T A T G T G G A A A G C T G A T T A G G A G T T C C T C C T T T T A T G G G G G C T T T A T T G G G G C T G G G T T T A G C A A A G T T  
G G T G A G T G A T T G G A T T C A C T C C C T C A T G G T G A G G G G C G T A A T C A C A A C G T A T G C C G C A T A T T T T A A C G  
C G T A T C G A T A T T T C T T C T G T T A C A T T C T T T A T A G G A T T C T G T T G G C T G T T A A T G C G C T A A C C T A C T C T C  
A T G T A T T A C G G A T T T A T C T G T G A G T A T G G A T G C G C T G T T T T C T C G T A A C A C G C T T G C T G T T C T T T A G G

TTTAGTCTCTAGCGTTTAAAGATAATGTGCCATTAGTCGCTGCAACAATAGGTATGTATGACTTACCTATG  
AACGATCCTCCAAAGAACTCATTGCCTATACAGCAGGCACAGGGGGAAGTATTCATCATTGGATCCG  
CTGCAGGTGTTGCCTACATGGGAATGGAAAAGTGAGTTTCGGCTGGTATGTCAAACACGCTTCTTGGAT  
TGCPTTAGCCAGTTATCAAAGAGGTCTAGCAGTCTATTTCTAATGGAAAATTGTGTGAACAAATTCGCA  
AAAGGTAGTCAGTATGGCAGAGTTCTTTAAAATTCTTTTAAATAAAAGGGTCTCTGCCTATTCATAGGC  
CCCTTCAAATGGAAAATGGGTCAAAGAGAATCGATTATGAAAATGAATAGGACAAAGCTATTAC  
TGCTTACCTTTCTTCTGCCATACATTCCTCTGTACGAGGAGAAAAGCTTGGCAACAAAGAAATGCTCTTCA  
AGACAAAGTTTTAAAGAGCATTTATTACAGGTAAAATATGCTCCAAAACATGAAAAGAGCAATACTTA  
GGATGGGATCTTGTCAAAGCTCCGTTCTGCACAGCAGAAGCTTCGTACACAAAGAAAATCCATCAACAA  
GTTCAAACCAGCAGGTCTTGTGATTTTATCGGAGGATTAATGACTTTACGCTGGAGTAACTTTCCA  
AACGATAAAAAGTGCTTACCTTCTTATACCGTACAAAAAGTAGTGACGGCCGTTTCTACAAAATAGAT  
ATCATGACTTTTCTCAGAGATCCGTGTTGGAGATGAGTTGCTAGAGGTGGATGGGGCGCTGTCCAAG  
ATGTGCTCGCTACTCTATATGGAAGCAATCACAAAGGACTGCAGCTGAAGAGTCGGCTGCPTTAAAGAAC  
ACTATTTTCTCGCATGGCCTCTTAAAGGCACAAAGTACCTTCTGGGCGCACTACTTTTAAAGATTCGTCTG  
CCTCAAAGTACTACGAGAGAAGTTCGTGTAAAATGGCGTTATGTTCTGAAGGTGTAGGAGACAAAAGCTA  
CCATAGCTCCTTCTATCAGGGCTCCACAGTTACAGAAAATCGATGAGAAGCTTTTCCCTAAGAAAATGA  
TGCGTTTCAATCGGTCTAGTTCGCTATTCATCTCCCAATGGTTCGCAATCAAAGGCAGAGCTTCGCAAT  
CATTATGCAACGAGTGGCAAAAAGCGGGTACAATATTGGGAGTACCGATGGGTTTCTCCCTGTCAATTG  
GGCTGTTATATGGGAGTCGGAGGGTCTTTTCCGCGCTTATAPTTCTTCGGTGACTGATGGGGATGGTAA  
GAGCCAATAAGTAGGATTTCTAAGAATTCCTACATATAGTTGGCAGGACATGGAAGATCAAATCCCTTCA  
GGACCGCTCCTTGGGAAGAACTAAAGATTATCAAGTATTTCTTCTAATACAGAAGCCTAAATTA  
TCGACCAACGAACAACCCAGGTGGTAGTGTCTTTATCTTTATGCACTGCPTTCTCATGTTGACAGACC  
TCCPTTAAAGAACTTCTAAACATAGAATGATTCGACTCAGGATGAAGTGGTTGATGCPTTAAAGATTGTTA  
ACCTGTTGAAAACGTAGACACAAACGTGGAGTCTCGCCTTGTCTGGGAGACAACATGGAAGGATATA  
CTGTGGATCTACAGTTGCCGAGTAATAAAAAGCCTAAAGACGTCAAGTATTGAATGTTGGAGTAAAGG  
GGATATCGAGTTATCAACACCTATTCCTCTTCAAAGTCAAAGAAGATTCATCCACATCTCGAGTTCAA  
TACTCTAAACCGACAAATGTCAAATCAATGAGCAAGACTTTTCTTGTGCTGACTTCTTCCCTGTAGTCA  
AAAAAGACAATGATCGAGCTCTTATTGTTGGTACTCGAACAGCTGGAGCTGGAGGACAAATCTTTAATGT  
GCAGTTCCCAAATAGAAGTGAATAAAACCTGTTCTTTAACAGGATCATTAGCTGTTAGAGAGCATGGT  
GCCTTCATTGAGAACATCGGAGTCGAACCGCATATCGATCTGCCTTTTACAGCGAATGATATTCGCTATA  
AAGGCTATTCAGAGTATCTTGATAAGGTCAAATAATGGCAAATCAGCTGATCAATAACGACGGTACCAT  
TATTCPTGCGGAAGATGGTAGTTTAAACTGGCGTTTCTGTTTATAGTAAGAGGGGCCTAAACGGATTTA  
TAGTCCCAAAGCCCTTGTGTGTTTAAACATTAATAATGGAAAAGTGTATGCATGCGTAAATATATACTC  
TGTTCGCTAGAGCTTCTGTGCGGAGTTATTCGTGCCATACAGACGGTTGAAGTAGCCCTGGAGAAGT  
GGGGAGACCTATTTAATGTAAGACAAACAAGAAGTTCCGTAATAGTCGAGTGATTTTTCGACACAGGA  
GTTCCTTCTTAAAGAGAAGAAGCTACGAAAAGGATGATTGCTATTGATGCGACATGTGGACTGG  
TTACAAAAGTGCATTCGTCAGTCAAATGTACGCTAAAAGGGTATCACATCATCCCTTATAGGCAAAAG  
AAAGCACGTTGAGATTATTGGGATACGCGGAGAAGCCCCGATCAAATCACTGTGGTAAAAATATCGCT  
GAAGTTGAAGCGCTGCCTTTAATGTCTCAAGATCCCAAATTTAATGTAACGCAAACGACATTGAGTATGG  
ATGATGCTGCTGATATTGTTGCGGCCTAAAGGCTCGTTATCCCTCGAATCTTTCATTACCCAGTTCTTC  
TATCTGCTATGCTACACAGAACCGACAGGGAGCTTTACGAAATATCCCTCCTCAGGTCGACCTAAATGAT  
GTAATAGGGGACAGGCAAAGCTCCAATCAAATCGAAAAGAGAAGTGGCAGAGAGACGAGGAGTTACTG  
CTAGACTTGTCAATCATCTGATGAAGTCACAGAAAGAAATTTTCAATATTCAGGAAATATCGGCATAAC  
CGCTGGGGCTTCTACTCAGAAGATGTTGTGCAAGCTTGTTAATGAAATTACAAGAGCTGATTCCTGAC  
AAAATCTATAGAAAATGGATCTTCAAATAGAAGAAGATACAGTATTTCTAGTTGCCAAGGAATATAATTAG  
AGAAGTCAGATGAGPTTATCTCATCTGACGGAATTTTCTCACTTAGCTATTGGTAGAGGCTGCGGACTG  
CATCATGTTGCGCAATAAGATCTGTAGCAAGAAGCTATCCATGTTTCGCCAATGATCTTAAAGCTCTTC  
TATCGATCGAAGCAPTTCTGTCGTGTTCTAAGCAAGCAGTTCTTTAATACTCTCAGCGATTGTTCTGACT  
GCATTGGCACGGAGATCATAGACTGTGGAGGAGACTTTAGCTAGTTCAGACAGAGAAGAACACACTTTCC  
CCATCCCTCAAATAATGTTCAAATGAGGCTTGTGCAACCACCTGTTGCTTTTCAAGTACATTGAG  
AAGTCTTCTCCACCTACTTCCCCAATGATAGGGGAGATACCTCCAAAATACCCAGGGTAGCTGTAGCA  
ATGCCAAGCCATCAAATAATTCGAGCCTGTCAAACAAAGGAGTCCGCGATTTTCTTCGCTTCTGTCATGA

AGTGTGTTCCGGGTAGATCGGCGTTCAAGAAGATCCGTGTTACGGCTGTTGAGCATCAGTTTCATGATTTTC  
CGCGCAGATACGCAGAATATCTAGATGATTCAGGCGTATGTGAAGCAATTGACTGAGCTGGGCTTCAGAG  
AGAGCAAACCTCACGAATTTTCCTCTGGTAAATACTCAGGATCAAAGTGGTGTCTCGCTCGTTTTTTACTAT  
GAGAAAGAAAGCTTGCAGAGATGGCAAGATCTTCTTTTCTTCTGTTGTTGATCCGATTGATGATGGTC  
ACGATCTCCTTCTTGTAGATAGGTCTTCTCGTTCTGTGTAAGAGTCTTCTCTCGCGAGAGTTTCTTCAAAG  
GCTGTTGTTTCAAATAGAGCCATTGGGCTAAGAAGTGTGCACGAGGTGAAGAGAGATTTCTCAAACAATG  
AGGAAAGAAATGGGAAGAAGATTGCTCTTGAAGCAGCGAATCTTTCCTTCGAGGAAGAAGAGCTTTCCAA  
ATTGAAGATAGTAACAGAAGTGTAGGGCTACAAAGTCAAAGTCAAAGTAAAGTCCCGATCGGTAAGAGCC  
TGTTGCGTGTGGGTAAAGATAACAGGTATACTTCGTAAGGAGTGAATGTTGGGGAGATGTCT  
GTATGCGTCTTGTACGGAAGATTTATGAGATATCGGGTAGAAGGCTTATTATGTAAGTCTGGGTTCG  
AGTCTCAAAGGTGTAGGGTGGGTGTAAAGACTGCTGTTCTGCTGTGGCAGATTCCTGTGTTTCGAGAA  
GAAGCAGAAGCAAATTGAGACAGATATTTCAAAGGACAGCTTTCCTCGAAAGGAAGGAATGTTTCAAT  
GAGGAAAGTTTTTCGTCTGCTCAATAACAGATAAAAGAGATCGAAAGGCTCCGAAGGATGTCTGC  
TTGACCTGGTTCAAGCAGCTGTAATTCATTGGAGAGGGCAGAGGCTTCTTCAAGAAGTCTCTGTCTGC  
TCTCCTGTTGCTATTGCAAATAATGAAGGTAGTGTCTTTCGGTACTGTTATCGTCATGGGAAAGGATCG  
CTATCGTAAGGCGTCTGTAAACGCAAAGTCAATTTTCCTGTTGTAATTGTAAGTTTCGTGTAGTTGTTCA  
AAAGAGGCAAACATAAGTCAAGGAGTGTTCAGCACGTAAAGAAATATTCATCCCGTTCCCAATTTATTA  
ATTCGATGCGTGCATCGAAAGTACAGCGTGCAGAAATTTCAAAGTCTGCTTGAATTGTAAGTAGAGGGC  
AACACCTTGTGTCAAGCCAAGCATTCCGGATAATGCTGGTGAATAGATTTTCAACGCTTCCAACAGA  
GGACTCATTCCAAATTAGCAACATAAAAGGGCAGAAAGGATAGCAGACAGCTAAAGACAGTTAAGGCCA  
GCAAACATAACCTAGATAACGCATTTTTTTTTCCTAGATCATTCCCGGAAGATGTCAAACAATAGCTCT  
CCAACCATCAAAGCTTCAAAGAGGATATGACTATCATGATTAAGTCTGCAAGAGGGAACACCAGGAA  
AGGATGCCACCTCAAGCGCTATGATGGTTACAGCACCCCAATTTCTATCCAAGGATGATTGTAGCGA  
CGATGCTCGCTAGAGAAATCCCAAATCGCATGGTTTGAAGCTTATCAACAATTTTCTGCACCTGTTTCGAT  
TCGTTCTTGGTGAACATGGTTAATTCCTGCTGAGTCTTTCCTAGATTGTCCAAATAGGCAGAATAGGCA  
GAAAGAAATCTGCAAGGATACCTTGTTAGTGAAGGTAGCTTAAAGAGAAGATCCCTACAGTAGGTGGTG  
TGATGATAGGAACAACCTCTCAAAGCTCGTTCCCTTTCCTCAAATATCAAATGAGAAGGTTGCTGAGAATA  
AGGGTCTTCTTTCGAAGAGTGTCTCGACGAGTCTTGACTTTCCTCTGATGCCAAAGAGGAGGGTGGAG  
GTTCTAAGTAGAGGATGTTCAAATCTTGTGCAACGGTTTCCTCTTTTTCAAATGTCACCTAACCTTTCCT  
CTAGAGACTCAGTTTCAGCGGAGAAGCTATCTAATTCCTTCATGATAGGAGACAGATTGCTCCTCAAAG  
AGAGCTAAATGACTCCTTGTGGTGTTCAGGAGTGTGAAGAAGGTTCTCTGAAGGTTTAAACAGGCTCCGAA  
GAAGAGGGTCAAATGCTGTCTCTAGCACTAAGCTCTGATGAAAGGTGCAGTTTTCCTGATAGTTTACGCG  
TGGAGTTTCGAGCCTGGCTGCAAAAAAAGGTTCCAAGGAGAAGATGTTGTAGTGCCTACAGTAGAGGA  
GAGTGTGAAGAGGGAGAGCTTCCAAAGAAATAGATGCGCTCTTAAAGGTGATGCGGCTGTAGTCTAGAG  
AAAGAAAGCGGGGCAGATTCCTCAAAGAAGCAAGATGCGCAAAGATCTTTCGGATGCAAGAAGGAGCGC  
TCTCCTTAGATATGGAGCAAGAAATAGGGAATTTTTCGTCTGGACGGCCAGAGAAGCATCTGGTAGATC  
GAGAGCAAAGAGAGAGCGACGCTGTCTGCTTGTAGCAAACCAAGGATGACATAATAATAAGAGTCCCAAAT  
GATCTATTTTAGGCGTACGAAATATCGCTAAAGTTTCTTCTTTAAAGAGCTATAGGCAGAGCTTGTTT  
TTACTTCAAACCAAGCAAGATCAAGAGCTTTTCAGCTTCTTCAAGGATATTGAGCAGGGTGTAGCAGAT  
GTAGGCATAGTAATGAGGATAAGGGTCTTTTCCTTAGCAAAGCAGCTACACCATAAGCATGAAGAGCT  
TGTTGATATTCAAAGCGCATATGGAGCGAAGCTCCTAATGAAACCAAATTTAGACACAAATGGGTAA  
AGAAATCAACCAGTAAAGCGGTAGAATTTCTCATAGTCTCCTTGTAAGTAGGCGTTGTATCCCTTC  
CTTGTAGACTTGTCAAGATCTTCTGAGGACAGCAAAAAATTTCAAATAGGTGTCCAGAGGGATATCT  
TTATTGGGATATAATTCCTCAAAGTACGCTTCCATATTATCGGGAAGCGGACACATATGAGGGTAAAGAGC  
GAGCAATTTATCAGTAGATAGGCATAATGACGCATTAGGGACGCATGTTGTAGATAAAGGTGTCCATA  
AGTTCCTTCAAAGTTTCAAAGCATTTGGATCTTGTCTGGTGGCATTGAGACACTTCTTGGAGATGGCGTT  
GCATATCAGTGCCTTAGCTGAGTGTATTTCTCCATATTTTCCAAACGCATCTGGATATTTTCTTTCAG  
AAGCTTTTTCCTTCTCAGACCAGTCTGAGGAGTCTCCAATTGGGACGCCTAGTTTTTAGCTTGTATCT  
ACGAGAGCGCGCAATTCCTCATCTGATTCAGTCAATGGCTCCTTTTCATTGTTAATTCAAACAGGA  
GTAAACGTCAGCGCATCGACACTATCTGTGCGTTCCAAACGCGGAGATACAACCTCGTGTGCTCGGCTTC  
TGCTTGGCCTAAGATTCAGCCATGAGTGCATGAATCGTAAAGAAACGTTTCGACACGAGCTTCTTTA  
GGAGCTTCTTCCGTAGCATTCTGGGAAAGAAACAAGGACATAGGGGAGGGCGGCTTTCAAAGAAAGTAC  
CTGATTCGACTCCTGATCTAAATTGGACGAAGGATGAGGGGCCGATGATAAGCAAAGTGAAGACAGA



AAATACTTCCTCAGTATTTTCATCTTCCGGATGAGAGGATCTTTTGAAGAAGACACTTGCATATCATCC  
GAGAGATCTTCTTGGTAAGAATGATCACTATTC TGTTCTTGATCA GAATGTC TTTCTTGTGACCGT  
CTCTTT TTTCTCTTCTGTTGAGCAGGT TTTAACTG CAAAAGAA GAAAATTC CATTCTGGGAA GAAA  
TTGAGCCGTTCTGTT GAATGGCTGTCTGGTAAGTACGAGAGCTATGATGAGAA CAC CAAAAGAAGAT  
GTTGGACAAACTCTACGGTGAGGCACGATAGACAAAGGAACGGCTCTTATTGTGCAGCGCGCTGCTGGAG  
AGAAGGGAGTATTCAGTCCCTGTATAGCACGAGCTGGTGTGGGGAGATAGGGACTCCTGAGAAGAAGG  
TAAGGAGC GAGTCTGTGA GGATCCCTGCGCCTG TAAAGAAAATATG GAAACCTTCCAGAAGGTGCTGGA  
GGTG CAAAAGCAGAGG TTTCTTCTGTTGGAG GGATCGACTATCAGAAGAAGGGGTCTCTTAGAGCTT  
GGAACA TTTCTGCAATCT GAAATTC CAGCTCGACAGTCTCGGGAGGAAG GAAAATGAAGGTTGAGGGCT  
AACAAAGAGCGGG GAGTCTTCTTGAGCCATATTAATATTCACAACACCTACCAGAGAGATCT GAGTCTCA  
TTACCACCGTCTTCAATAGATTGAGACAGAACAACGTCTCCTATGCTTGTT TTTAGA ACCCTTTTCTG  
CAGAA GAAAATTGAGAGGAGCTCCCTGGTTCTCCCTAAGAGAAGCG CAAATCGGTACGGAG GAAA GGG  
TGTGG GAGTATCCATAGTTACAGAAGTTAATGT ATCCAGGCCT TTTAGAAA GGAGGGA ACTTATC TAAAA  
AGTATT TTTCATGCAAGTT GGAT TATAGAGCTCGGCAGCATTGTTACTGTCTAAGGTTCAATATATTAAT  
AGGAGGTTAGG GAGTACATCATTGGCA CAAATGGAGGGACAGGTAGTATGGTCAGGAA GAAA AAGCG GAA  
ATATTGATACAATGGAGAGGGAATATTGTATTTTT TTTCTGATCAAAAGAGAAA GGTGTGC GAAA GAACC  
TAACATCT CAAA CACATATAGAA GAAAAGAGCGCAGAAGACGATAACCTATTGC GAAAATAAGC GGATAG  
AGATACCATGGT TTTCTCTATC ACTCATCTATGCCAGGTGGT GAAA TTGGTAGACACGCT GGATTTAGG  
ATCCAGTGCTTCGCGGCATGTAGGTTCAAGTCTTATCC TGGGCATGGC TTTCTTTC TAAAAATCTTCTTG  
TTCAGATACCTAGTGTG TTTACAAA GATAACCCGAGTCTGTGGTTTT TTTCTGCGGCATCGGAGAAA AGGT  
GGGG GAAAGTGAAT GAAA CAGCTGTCAATCT CAAA GGGATGC TTTCTGTTGAGTCTGTCTGTT CAAA GGG  
CTGATGCGGTGTATT CGGGATCTCTAGTTCAACCTTCG GAAA GCGTCTTGTTCAG GAGTAGAACAAAA  
AGAACAGGAAGGGGAGCGGATTCCTTATAGTT TTTACT ATCCCTACCAGTATGACTATTATTATCCCAAT  
ACAGGTGTAGACGAGGATACACCAGA GAGTTTTCAAGAGAAGCAC GAGTGCCCTTGTAAGAAA CCTGTTT  
CAGAGAAA AAGAAGAAA AAACCTCGTCGAGATCTTAGATATCTCTAGGATGGTAGGTGTGGAAT TTTCT  
GATTAGGCTCTCTGAGGCTACGTGTGTATAGAT TTTCTCGTGAAGAAA TGCGAGAATGCCAAGCA TTTCT  
TGAAT AATACGAAGATCCGCGTGGTTATT GAGTAGGTGCGTTGCAAACGCATGCCGCAGAGAATGCGGC  
AAA TGCG CAAA GTAGTGACTAAT CAAA CATAAAA AAGTAATGCG TTTCTATACACAGGAACGATCGAGTTT  
TTTCTCTCTGATAGACAAAATACATGTTCTTCAGAGGGATTTTTTT CAAATAGTTTCATCTCT GAAA GAG  
CTTAAGTAAGCGTCAATAGCTTG CAAA GC CAAAATGCTGATGGGCAC GAGT C GAGTCTTTCTTCC TTTAC  
CAGTAACGC GAAT TAAA ATCATCACTGATGTCCCCGATACAAAAGATCACATAGTTTGGATACAC GAATTC  
TGTTGCATAGAATGTATACAGAATAGCGGCGTCTCTGCTTGCTATAT GAGTGTC TAAA TTAGGGATATTC  
AAAGGTTGATCTAA TAAA GAATTC ACTTCTTCTGTG GAAAGGATAGAAGGGAGTCTCTCCAGAT TTTCTG  
GATGTTCTATAAAA GGGCTGTTGATCGACAT TTTACATCT TTTAG GAAATG GAAA AAGACT TTTAGGGC  
GATCAGTCTGCGAGC TAAA GTCG TTTCTAGATTC TTTAGCTTTATGGCATT TTTCTACAAATAGGAAGACA  
CTCTCTTGTTGATTC TATCGGTAGCCTCAATAGAGGGCGCTTG TAAA AATAAGAGAACATCTTGGAAT  
AAGCTTGACG GAAA GAGGGGAGATTC CGCGATCCACGGAGAGAAA GATCG TAAA TTGTTCTATCAGTCG  
CAAA T GAAA GAGGGCAGAGGGAGT CAT CAAATTTA TTAG GAATA CAAA CAAGAT TAAA AGCAGGCAATT  
TTTA TAGGGATAAA CATT TTTAGAAT AGAAGAAA GCGTAT TTTCTCCTTGACAAAATAAGAT TTTCTTTAA  
TTAC GAGTGTAGGAGGTCGTATGTTGATAATAACG TTTCTAAA AGGTACCATG GAATAGCTCTCCATCC  
TACT GAAAGAAA GATGAT TAAA TATAAGGTCTGGAGAGGATAGTACAAAGGCGCTGG GAGT TTTA TGATC  
AAGATAGCACAAG TTTCAAACCTTACATAATGGA ACCCGGAGC TAAAATCCCTATTC CCGGTTGAC CA  
AATATGCGCAAGTA TTTCCATCTC CAAA GAGAAT TT TTTCTTCTTCGCATGAGCTGG TAAA TGAAGGTAG  
AGTTCCTATTC AAGGTCCTGACGG TTTCTGCAGTA TTTCAAAA CAAAATCGCGGAG GAGT CGCTGTA  
ATGACTGAGCAGTATAAGTATTATC TTTCTCAAAC GGGTGTATACGCGTTCTATAGC GGACAAA CCAAT  
CCGCTTCTTT TTTATTC TGGAGAATATG TTTCTCAA GAGTGCA TAAA CACGCCGATCTAGAAA AAATTAG  
AAGAA GAAAAGATCT TAAA GAGATCC TTCC TTTCTATTCCGTCATGGAGCGTTGTTACAAAATCAGCCT  
AACCTATCCATGGAGAAGACCGAGGTTGCGCTTCTATT GGATACATTAGATGCAGCTATTGCAGAACCTA  
ATAAAGAAA GAGTGT TTTCTTTA TTAGAGAGATTCG TTTATGCA GGGT TATC TAAA ACATTGCTCCCAGC  
CAAA TATGATGAA GAGTATCAAGGCATAGTATCGGAAGATCC CAGACCAGGGAAT GAGGCTGTTCTTT T  
TCATTACTGAGAGCTGCAGCTCTCAGTATGCGGAGGAT TTTATTC AAGAGAGT GATGGGGT TGTACCT  
TACTGCTGCGCTTCTCCAGAATTC CTTGCGGTGCGT GGAT TGGCCTGTAT CAAA AGAATATTGGGGA  
GAT TTTCTTTCGAAT GGTCTAAGAAA ACC ATTC GAA GAGTGAT TTTAAA AGCTCACG TTTCTAGGGAGCTT

CGCATCATTAGTCCAGGTGTGTATTCGTCTCGTTTCCTGTGTCGAAGAACAAGGTA GAAT TATCTCTTGT TA  
AAATAAA AAATCTTTTAGAAA AAGTGGAGATAAAAAGCCGGAACCACGTATCTATGGGACCGTTCAAATAA  
ATAAA TGCAGAAA ATATTGTGGATCC TTTTTC TAAA TACTC AACACGTGGAAC TTCTCGTTTC TGGTA  
AACAGAGCAGTCCACAAGATCT CAAA GAAT TGTTC TAAA G CAAA AATCAAGATC GGATAGTTCT TTT  
CCGCCCTGGGCAGAGACCGTT CAAA TT GAGT TGCAGGTAAG ATTC AACAGGCA GAGTCGCACCATTCA  
GGGAT TTTTTC TCTTCTGTAAT GAAA GGAAT TTTCC CCAAGATTATC GAGT CTATCATCAAAATGG TT  
TATTGGCTCATGATCC TTATGCCTTCCC TTTA CAAA GGGG GAAA TCGATTCTTT TTTATTC CATGAAGG  
GACTC ATCAGCGTATCTATGAACGCAT GGGT GCTATCC CTTGT GAAA TTGATG GAGT ACCTGGAGT AAGA  
TTTA TTG CAAA GGGCCCTCATGCTCAACGTG TTTCT GTTATTGGAGAT TTTA ATGGGT GGCATGGGCTCG  
TTAATCC TCTTCATAAGG TTTCA GATCAAGGAG CAAA GGAGCTG CAAA TTCTGGCCTTACAGCAGGAGC  
TTGTTACAAATGG GAAA TGGTCACA GAAT CTGGGCAGGTTCTCAT TAAATC GGATCC TTATGGGAAGTTT  
CAAA GTCCTCTCTCGGAGCG TTTCC GTTGTATCGATGATTC TTAT GAAT GGAACGATAGC GAGT GGT  
TAGAAGAGCGCAT TAAA AAGACTGAAGGCCCTAT GAAT ATCTATGAAGTTCATGTA GGGT CTTGGCAATG  
GCAGGAAGGACAACC CAAAAT TA TAAA GAGCTAGCAGATCAGCTAGCTCTCTATTGCAAGCAGATGCAT  
TATACGCATGTA GAGT TGCTTCCC GTAACCGAGCATCC CAAAATGAAT CTTGGGGATATCAAAACAACGG  
GAT ATTATGCTCCTACAAGTCGTTATGGCTCT CAAA AAGATTTA CAGTATTTTA TAGATACCATGCATCA  
GCATGGTATCGGGGT GAT TTTA GATT GGGT TCCAGGACACTTCCCTATAGATTCA CAAA CAAT GAGT GGT  
CAAA ATGGC ACTC CTCTGTAT GAAT ATACACG GAATCCGAGT CCGTTGC ATCC TCACTGGCACACCTACA  
CT CAAA ATTATGC TAAA CCGAAGTGTGCAAT TTTCT TTTA GGAAGTGCCTCT CAAA GAT CGA TAAA AT  
GCATGTAGATGGT ATTC GTGT GGAT GCTGTCTCATCTATGC TTTATTTA GATTATGGAAGATATGCTGGA  
GAATGGGT TCCAAATCGTTATGGT GGAAGAGAGAACC TTGATGCGATTCCGG TTTCTTCAGCAATTC AACA  
CTGTG ATTCATGA GAAA ATCCAGGTGT CAAAAC TTTCTGCAGAG GAGTCGACAACCTTCCCTAAGATTAC  
TGTATCTGTGCAAGAAGGGGGATTA GGG CAAA ATTACAAATG GAAT ATGGGATGGAT GCATGATACACTG  
CATTATTTTC GAGAAGGATTTCC ATATCGTCTTATCACCAGAGCGATCTCAC TTTCCACAATGGTATG  
CTTTTAGTGAGAGGTT TTTACTGCCTTT TTTCCATGATGAGGTTGTTTATGGGAAA CGCAG TTTA ATCGG  
TAAGATGCCTGGAGATGCTTGGAGACAG CAAA CTAGTTGCG TTTA TTATTAGGTTATCAGATCTGTCAA  
CCAG GAAAGAAA TTGCT TTTCATGGGGGAGAGT TCGGT CAGGGGAGAGGAT GGTCCCCCGGTCTGAGC  
TAGACTGG GAAT TATTAGATA TTTCTTATCATCAAGGTGTGCA CAAA TGTTGCAAGAGC TAAA TGC TTT  
ATATGTGCAGAGCCC GCAACTGTGGCAAGCGGACCATCTTCCCTCCTC TTTCCGTTGGGTGAT TTTAGT  
GATGTGCGTAATGGCGTTGTTGCTTATCTCCGC CAAA CAGACCGGATGCTAAGAAA GCCAAA CCAAACG  
TGCATCAT CAAA GGGTAGGATAC TTTCTCTATTACTTACTTCCCAT ACTCCCC TAGAATCTTGTGACA A  
ACTGAT GAATACAGATAACACAAGATTC GGGGGATCGGG GAAA GGT TTTCCGAGAGCCT GAAATCC TTACA  
CCT GAAA TCGCGAGACAAGAGAGAGAGGCTGCAGGACTGATCGAAGC GGATGAT GAAA GTGGTCCCGACT  
GCTGGGGCTTAGATATTGAGCTGCCTCCTCAGCT ACTCTGAT TTTCTCTGTAACGCTACAGTAGGACAA  
ATTCTCTAATCC GTAGTTGGCCAGCTCAAAGAT GAGTATCTAGACATAGCTTGTTCGGTTGTAGAGATAA  
AATCAGC GAGTAGAGCTTCTCTCAGAT GGG CAAA TAGGTAC TTTCTCTCAAGATCAAAGTCAGGAT T  
TTC TAGGTACCACGCCAAGAAT TGACAGCACCAAGCTCCACAGGT GAATTC TCCAGGAGATTGGACT TTT  
ACTGTGATCC GATGCGTACCTG GAAA GGAGAAA GTA ATTC TTTCTTGATCG GAGT CTGCTCCACCTTCA  
AAGGATAGATAGCTCCAAGGGAGACGGCAAGTCTTCTAATTGTTCCCGCA CAAA TTGTGGAGAGGCTAC  
ATAGTCGCACAAACTGTGCAAGAAT GTGACACATCGAT ACTC GATATCTACGATAACCAGT ACCC AGTGA  
CTA TTTCTACTC GGCCAGAGCTCATAGTCTGATCC AT TTTCTGTAAGCATAGCTTCTTGCCTATCAGCAG  
AAGGATCATGCCACATAAC GAAT GGAATACACTAGAGGTGCACAGAAGTCGTCGATAGTTTTC TGGTGT  
GCAAGTCGGAGGACA GAAA AGCTCGCACATGTCCG TTTCTGTTGACGTTGAC GGAT TG TTTCTGCATGAGG  
CAGTTACAAATAC ATTC TAAGAAA TTGAACAAA GTAAGC GGAT TACAGATGTCTATAGGGAGA ACCC GCC  
TGTG CAAA TTCTGCATTAAGCACGA GAAT TGGAACAAATGTTCTGTT ATCC CAGATAGGAAGAGGAGGACC  
GGTTAAGACGTCTAGTTGTTG TAAA AGCTTAGTTGCTTGGCTGTGGTCCCTCTTGTGCTAAGTAATCC  
GCATC TAAA AGGTCACG GAATGTATATGCGCAGA GAAT AAGTCCGCAAGAGATCACTATGAG GAAT AGCG  
CTATGATGATTC TAGTAAC TTTA GTATCGCAAGAAGCATC CAAAAA GATGTATAGGTAGTTGAAGGTCT  
AGAATACGAACATG CAAA TGGGGGAG GATTTAT GAAT TGGTTCCATAA TAAA TTGTTCA TTTAT TAAA CAG  
ACAAATAATTATATCT GAAAATGGGGT TTTCCAGT TAAAATTAATCAAAAACAAACAT TTTATAAAAATT  
TTTA TTAA TTTCAAAAAACAATATCC CTGCTGCTTA TAAA AAGAGCAGAT GAAA AATAGTAA GAAA TAA  
GAGCGACCATCTCTCGATGGCCTCTTA TTTAAA AAGATT TTTA GATTA GAAA AGAG TTTA TGCTTCAGGC  
CAAGAAA GCTCTGGGAG ATCC TGAACAGCCGCTTCGCAAGCCTGGACAAATGAGGCTAGGT TTTCTATGGC

GTTCTACAGAATCAACGGGGAGATCATTCAAAGCGTCTGTAAGGGGATCTTTC AAATACCAGTG TAAAA  
TTGACAGCACCAAGCGCCGAGCTGGATCCGGAGCCTC CAAAGAT TACCTCC CAAA CTGCAATC TTTACA  
GAGAA TTTCTTGCTGTCATAGGCA GGATACACCTGGTCTAGTTGTTGAGCAAAGGAT TGAAGCTCTTT TT  
TCATAT TTTCTGGAGGCATCACATAGTTGTA TAAA CTATCAAAAATAGACCAACGACGAGCTT GAATATC  
GACAATAACAAGTAGCCAGT GACTC GCTCCTACAGATCCTTTTA TAGCTAGCTG TTTCATAGTCTGCATG  
GTATCCGAGAGTGT CAAAGAGTAGGGT GATACCACA TAAACACAGGGAGGAGGGTGTTC CAAATAAA T  
GGCGCGGTAATTC TC TTTTGAACAGCAGATAGGCAGAGGGCC CAAA ATAGGCTCCCCTCG TAAA ACAGC  
TTT CAAA TCTTC TAAA ATCGAGATGAT TTTCTG TTTAAA GTT GAAT ATGGTAGCTGGGGGAAGGTCTCC  
AGAG GAAT GAGACCT GGG TAAA GGGT GTG GAAA TAGCATAGACACTT GAAA ATAATGTCAGAATCC CAAG  
CAGGAACCAACGCTTCGATGGTCTGTCGTCGAGCCATATCTTCATACATCTCTACAAACACTTGCTCCGG  
AACCAAGGAAGGAGGTCTTCTTGCGT TTTA ACTGG CAAA GGAGCCTTAGGAAGAAGAGGAGGAGGTGTA  
GAGGGC CAAA GAGCAGAAG GAGT ACTAGGACGTGATATGACGGGAGGGGGGGGAGT ACTAGGACGCGGTA  
CGGCAAGAGGAGGAGACGGAAGAGGTACTGGAAT AGAGATGGTAGGTTGCTCCTTAGTAGAAGGGTGTGC  
AAA GCAGCACCAAGGGAA GGAT TGTAGATCAGAAA AG GAGTAAA AGAGGAGAAT CAATCC TAAA GTAACA  
ACAACAAGAAGAACAGC TAAA GCTGTACGAGCTACTT CAAATAAA AGTTGG TTTG GAGGTTCTTCAGAGA  
TAAGAACTGGT TTTGAC GAATCC CGAGGAGGAACAGGTGCCGTC CAAA AAGTT GAGT TGGTGGGAGATAA  
CATAGGGCTACAAA CTTAATTAACCTGCTAAAAGAA GCATTAT TTTAGGAGATATACTCTTT CAAA CCAT  
GGG GAAA TTAAGACTTCCCTCTAGC GAAATCCCAT GAAAT TATAG CAAATTC TTTAAA ATC TAAA ATAGA  
CGGGAAGAGGAT AAGGGGGCCGGAGCCCCCTCTATT ACTCTAGAAT CGCAGAGCAA TTTCCCATTGAGA  
TAATTACAGAAGGTTGAAGAG GAGT AGAATCC ATGATACTG GAAA TGAGAGT TAACCAACTC AAAGGTT  
GTG CAAA CTGTGAGAT TTTA TAGGACATGGCATGACGCGATGAGGGGCTTCCACTACCAAACCAATACC  
TTTA CTGGCTAGGAGCTGGGT CGGATCTCTAGTCTTGTCTATACAGAACGGGT TGGTATGCCAATTTCT  
ACAGTCCAGGCTTGAGGT CAAA GGTAGC ATTC A TAAA GCTACC TTTA ACTCCAATAGGGACTAGGACAT  
TGATCAAAG GAGT C CAAA TAGAAA AGCTTCGC GGATAGGCTCCCACCTCAG TAAA GTGAGACAGGCTAGA  
ATAAA TACCAAGAGCACCTAAA AAGGAGCTGTCAGTATATGCGTTG ATCC AAAGGG TTTCATAGGGAGA  
TCAAAAAAACAGCACCTCCCATCG CAAA ACTACGGAACGTCCCTTGAGATGTTAGAT TTTCTCCTTTGGG  
TATA GAAA TGGTGACAGTTATGATCTCCATAGCTG TAAA GACCAACTAA TTTA GCCAGCAAGAAA CCTTC  
TTGCAATGAGAAGAGCA TTTCTCCTTGGCATGAGT AATT TTTA GAAGATACGTTGTT TTTCCGTAACGC  
TCATT GAG CAAA GTGTAGGTCTGACT GAATTTCAATGAGAAGGTATGTG CAAA CCCTGCTATC ATCC CCG  
CAGAGTATCCGGAAGAGCGCATATGGAATCCAGGATGAT TTTCTCGAGGATCTTGG TAAACCATCATGCC  
TAGTCCCTCCTCTGTAATTC CCCCAGAAAGGATGATCACTAGGTGTCAGTTCTGCACTATTT TTTA AGCTT  
TC TGTGCAAGCAGCATATTC CCCCATAAGGTATTC GCTATGAGGGGACTTCTGTG TTTCCGGCTAGGAA  
CAT ACCCAGCAGGAAGCCAAGTCAGTAATAAGGTTCTATGGAAT CTATTGGCTTT CAAA GGATCTGTGAT  
TGTTGCTGAAGATGCTGGTTCT GGATCTT GAGTT CAAA CCCAGCCCCA ACTC CAAAGTCC TTGCC ATCCA  
TAATGAGGGACA TTTA GTCCCGA GAAA TCCATATCATCAGATCTTAGCTGGTTATCACTAGCCCTCAGAAA  
TAGATAGCATAGGCTGTGATGACAGAGCATGGGT TAGATCTGT GGATTCATAAGGA GAATTC CCATAGTC  
ATCAAT GAGTGA GAGT TTTA CATCACTTAAT GAAA AGGTAGCTGCAGTATCTGCTGTATAGTTATTGCTG  
TTA CAAA TAGGCTCT ACCCACA TAAA GGAATCTCAGCACC ACT TTTCAGAATGGA GAAA GATTC ATC  
CAATATGCTTCAGTGTATAGAGGCATTGCTAGCAGAATTTCTGCACCATT TTTA TAGCAACTCAGAAC  
TGCTCC ATTC CCAAGAGAAA CAAC ACCCCAG CAAA TGTGAATCGATTC ACTGTAAGCTGAGCATGATCT  
TCGATACATA GAAA ACCATTACTGAGAGTAAG GGGT GCAGGTGTT CAAACAAATAAA TTGCGTTGAT GAA  
AATCTGCAGAAT TAACAGTAGCTCCT GAAAATACTACAGAGCCTG CAAAATCAGCTTCTTATTGAAGGA  
CACAGAG ACCCCTGCATTGCTAACTTCAATAGGATCA TAAAAAAT TAAAT CAAA GCT ACTC CCGTCTCCT  
AATA GAA TTTCAACAGAGGAGCTTGCTACTGTTATTGCA TTTCTTCTAGGAGGAT TAGCTGACGTACTGG  
TACCA CAAA CATTAGTTACATTAGTCACAATAT TTTCAT TAAA AATAATAGCATGGCGGTCCGGCAGAAA T  
CAAA GAGT TGCTGGTTCCGTCTATATAGATAGCGCCCCCTTATTATTGGCGATATTG TTTATAAA GTAG  
GTAGGGCCATTATCC ACTA GGGT AAC TACAGGAGCG TAAA TAGCTCCGCCATAATTT CAAA TGATATTGT  
CAC TAAA AAAGATCC TACCACGATTGCCTGTAACATCTAGGC GAGT AGTTACT TTTA ATTGCTCCTCCATC  
AGAAG ATTC TGAAGAAGCTG TTTCTACATT TTTAAA GCAGCGATTGTTATA GAAA ACGATGTTACCACGA  
TTTC CTGTTAGAGAACAGATAGGGGAGAAGATCGCTCCTCCTGCACAACAGGCGTTATTGA TAAA GAAGA  
GATCGCAGTTATT ACTC TCAAAA GAAT TGCTCGTTCAGCATAGATAGCGCCACT TTTCTGCTGTATT  
AG CAAA AATACAGATGTTGTCCA TAAA GAGAAA ACAAGACTGATTC TCGCTCACAACAAAGGTATTAGCG  
GTACTAATGGCTCCTCCTCGGACATAA GAAAAGTTCTTCA TAAA TCC GACCACATCATGATTGTGA TTTA

TG TAAA GAT CAAA AGCAT GAAT GGCTCCGCTTCTCTTAT TTTA TTAACAGCTGCATTAGGAT TACTCGA  
TG TAAA TGGTCTGCAACAAGTATTAT TTTC AAAGATTACAGGACCTATTGTATCAC GAAT CTCCACGGTA  
GG GAAT TGGG ACTC GCATAACCAATCGCACCACCAC TTTC AG GGGT GAGATTT CAAA CAAA TAAA TAC  
CTTCTT CAAATGTATCAAAAAGCTTAGGTAATCTGTTATTGTGACAGCAGCTCCTTCATTGG GAGT TT C  
AAA TAGAATAGCCAGTATGTAGCGTAGGTTATCGAGATAGCAGTTAGTGAGATTGT GAGT GTCTCCTGTG  
AAACTAAT TTACAAA ATAGCG ACTC TTTC GTA GGAT CTGGAAC T GAGT TGGGCATAA GAAA GATTC TAG  
AAGGAACCTCTCTAGCTAGTCTGATAGGGAGCTTCCAATAAG GAAA AAAAA GAAT GCTTT TTTC ATAGT  
TAAA AGACCAGAGCTCCTCCTGCATTGATGTAATGTGAGACAGTGAAGTAGCCACTTCTGCTTGATAGT  
TAGCAAATAG TTTC AGATGAGA GAA TTTA AGG GAGT GAGAACCTCTCCCA TAAA AG GAATG TTTA GCTAA  
TG GAGT A CAAA TGGTG ACCCAAGAACC GTTAT CAAA GAT TAATAGTGTATT GAGT AGAGGGCG TTTC CAG  
TATAGGGTGGGT TGGTAAGCGAGT TCCA TTTC CCAGGA GAGT GTTGGCCAAGTATCAGAAGAAT AAGCTC  
C TTTA ATTC TATTGGAGAGACAATGGCAGTATGGGCTTGCTCTAATG TAAA TAATCTAGCTAGATCACC  
GC TTTC TCGGAT AGC ACCCGGT CAAA TGCGAGA GAA TAAA GCTTGAGCAAATG GAGT GAGCATTATTGAT  
CGCAAGGGCATGCTATCGCGTAGTTCACAGCGAAGGGAAGCTCCTAAGGTTGTA GAGT GAAATTTCC TT  
TAGAAGATCT TTTA GTTCCATAGAAA CTCCGCATGTTATGTGTTCCATAATTACAAGCTGCTGCTCCGAT  
AAGAGCAATGCGATCAAACATAGGAT GTTC GAAA CA TAAAGCA GAAA GATAGTAACGAGAA GAAA GGCGG  
TTA CAAATTTTC TT TTTC TTTC ATCTTATCAGATGACTGGGAGAAG GAAA GAA GAAA CTTATGACCATGAG  
CTCCTGATGCTTGAGAAGAGACGGTAT ACCCT CAAA ATGCAGAA GAGT AGCCATGATAACT TAAA CGTTC  
AAA TTGT CAAATAAA TAATGTTGTTGCAGCTCCTTGCAAAGCAAACCAAGAGT TATCTGGGAGT AATGAT  
CGTAAGCCCATGGTCATG TTTC TTCTT GAAT GCACCAAGCTATTTC GCTATCAGATCTCCTCTAC GAATAG  
GAT CTACTATGT ATCC GACTGGGGT CCAG TTTA CAGTAAGAGT GTGTCGGGT AACTTGTACATCAGTTGT  
AGTAGAAGATCCGGATCCACTTCTGCAGAAGC TTTA ATACTAG GGAT GCCAGCTGTAGTTGTGCTATTA  
GGAGTGAATG TTTC ACTAGTTTT TTTC TGCTCAGCGATA GAGT TGGCAGATGTTGGAGCTGAAG GAAT TAT  
TATTAAGCGTGATGGTATAGGTTGTTGTT ATCC AATTAG GAGT CCATAGACCTTGATAGCCGTAGTGTGG  
AGGAGA GAGT AGAGAAGT ATTC AGA GAAT CAAA CCAATTGGGGCCTAATTGCCCATCATTAGTGG TTTC T  
AT GGAT AGAAT TGGTTGTTCTGCT TTTC CCTCTGGAGAGGTCCATACTGTGCTAGACTG ATTC ATAAT TTT  
CGTCTACAATT GAAA GCGCCCAT TAAA GATAATCATTG GAGT GCTTATACTACTTGTGCTTGATG GAGC  
AAA GCCGGTATCAGTAT CAAAGGT CATATCTTGT GGGT TGACGC GAAT ACAAGGCGG ACTC TTCCCTC  
AAA AGAATAAT GGG TAAA ATAACACCAAGA CAAA TAATATTGAGCTTACCGTGC TTTC CAACAGTCAGCG  
TAGCGCCGCTTCC TAAA GCAAGTAGACTAGTT GGATTCT GGG TAAA AG GGAT GTCAAAAATTC TAGTTC  
AGCACCATCTTCTATGGC TAAA GTGCCAAATTTCAAGGTAGTAGGACCTCTCTAATATAATTATGTTCT  
GTTCCATAAGAGT TTTATGTGCTGGACACAAA TTTA TAAGAGA GAAT ACAACAGCTCCAGAGAACTC TT  
CTATA GGAT TAATAGTGATTACA TTTC TACTACTGGGGAT ACTTGAGCATTATTAGGCTCTCGCACACG  
CTCCATT GAAA AAGATCA TAAA AGTAGATAC GAGT ATCTTC TTTA GCCCAAG GGAT AGTGATAAGGT  
GTCTGCGTGTATTATTAATAT GAAA AAGT TTTC GC ATCC CTAATAAGTTCGCATCAAATTTAAA TACGA  
CATTATTAT TAAA ACAATATCGCCTGTCCCTGTAT GGATATAA CAAA TGGCCGGACGCAG TTTC GATAA  
AT TAAA GGCTGCTCCCAGGCAGCA GAGT TTTAGAAA ATAGATAGGACCGTTA TTTC GGAT GTCAATG  
TAACCACAGTCAATAGCTCCCCGGCATGAGCAGCGGTATTGCTATC GAAA TAGATAGGACC TTTA TTGT  
CAATAAAG TAAA TCC TTGTGCTG CAAAAT GGCTCCTCCGTTACTTGCAT GAGT AGA CAAA TTCC ATCC  
TATGGAAC TATTG CAAAAAAAACAATTC TTTC TTCATTATTGCTAATGACGCATT GGGT AGCGCTAATA  
GCTCCGCC TTTC CCACCTTGTTGTAGT TAAA AAT TATGGGACCGAGATTATTACTAATAGAGCAAGAGC  
TT TTTC TGCTACAGATTGCTCCTCCTCGAGCCATAT TTTC GGCTCGCGTATCTGGTATATGATTAAGCGT  
GTGATTGTTCTCAA TAAA ACTC C TTTA GCAGTATCAGTTATTGATA CAAAAGT GTTAGCGGCGATAGCT  
CCCCCGCAGTCTCCAGACATATTGTTAA TAAA GGGCA GAGT TCG ATTC CCTGTCA GAGT GAT ATTC CAAA  
CATAAA GCGCACC ACCC TATTTT TTTC GCT TTTATTTCTGTCCCCGTATATTGAGCTCCGGCTGTTGT  
GTTATTA TAAAAAAGTACGTCTTGATT ATTC GAGAACC GAATAGGGCC TTTA GAAC GAATAGCTCCTCCC  
CCCTTGTTATGTGTGCAGTAGTTGTTGCAAAA GAGT AGGTTAGCATTATTAGAGGGCCGT GAAT GAGATAG  
TAACCATATCAAAA ACCC CTCCAGCAGCAGAGGTAGTGTTAATA GAAT TAGAAA AGA CAAACG CAAA CGT  
ATTGCTGCAATAGTGCAA ACTC CTCTCCCCAT GAG TTTA TA CAAAAAAGGTGACAT CAAA AGCAGTA  
AT TAAA GAGACAGGAT CTAGGACGAACT GAAT CTCTGTCC GAAA AAG TAAA TCGCCGGA ACTGTAGCG  
TATCCG TTTC ATTAGCTTGCAAAAAT GGATATAGTT GAAA GATAAAA AAAACTGAGGCAAGCAAAA GGATAG  
AGAAGTTCT TTTA ATCATCGCAGGT TAAA GGGG GGAT GTTAT TTTA GCCTGCAAAATAGTGTAAATTT GG  
AT CAAATAAAGAGAAA AGGAC GAAT GCGCTGAAGATAAGAACA TTTA TTGATAT TAAA TTATTAATTT TT

TATGAAGCGGAGTAATTAATTTATCTCTCAGCTCAAAATGTGATGCAAACGTC TTTCATAAGTTC TTTC  
TTTCAATGATTC TAGCTTATTC TTGCTGCTC TTTAAA TGGGGG GGATATGCAGCAGAAATCATGGTTCC  
TCAAGGAATTTACGATGGGAGACGTTAACTGTATCA TTTC CCTATACTGTTATAGGAGATCCGAGTGGG  
ACTACTGTTTTTTTC TGCAGGAGAGTAAACAT TAAA AAATCTTGACA ATTC TATTGCAGC CAAA CC TTTAA  
GTTGT CAAA GGA ACTTATTAGG GAGT TTTACTGT TTTAGGGAGAGGAC ACTC GTTGAC TTTC GAGA ACAT  
ACGGACTTCTACAAA TGGG CAGCTCTAAGTAATAGCGCTGCTGATGGACTG TTTACTATTGAGGGT TTT  
AAA GAAT TATCCT TTTC CAATTGCA ATTC ATTACTTGCCGTA CTGCCTGCTGCAACGACTAATAAGGGTA  
GCCAGACTCCGACGACAACATCTACACCGTCTAATGGTACTA TTTATTCTAAA ACAGATCT CAAA TTTACT  
CAATAATGAGAAGTCTC ATTC TATAGTAA TTTA GTCTCTGGAGATGGGGGAGCTATAGATGCTAAGAGC  
TTAACGGTTCAAG GAAT TAGCAAGC CAAA TGCTTCCAA GAAA AACTGCTCAAGCTGATGGGGGAGCTT  
GTCAAGTAGTCACCAG TTTC TCTGCTATGGCTAACGAGGCTCCTATTGCC CAAA TAGC GAAT GTTG CAGG  
AGT AAGAGGGGGAG GGAT TGCTGCTGTT CAGGAT GGGCAGCAGG GAGT GTCATCATCTACTTCAACAGAA  
GATCCAGTAGTAAGTT TTTC CAGAAA TACTGCGGTA GAG CAAA ATGGGAACGTAGCCC GAGT AGGAGGAG  
GGATTTACTCTCTACGGGAACGTTGCT TTTC CTGAAT AATG GAAA AACCTTG TTTC TCAACAATGTTGCTTC  
TCCTG TTTACATTGCTGCTAAGCAACCAACAAGTGGACAGGCTTCTAATACGAGTAATAATTACGGAGAT  
GGAGGAGCTATCTTCTGTAAGAAT GGTGCGCAAGCAGGATCCAATAACTCTGGATCAG TTTC CAAA ATG  
GAGAGG GAGTAGT TTTCTTTA GTAGCAATGTAGCTGCTGG GAAA GGGGAGCTA TTTATGCCAAAAAGCT  
CTCGGTTGCTAACTGTGGCCCTGTACAATT TTTAAG GAATATCGCTAATGATGGTGGAGCGATTTATTTA  
GG GAAT CTGGAGAGCTCAG TTTA TCTGCTGATTATGGAGATATTAT TTTC GATGG GAAT CT TAAA AGAA  
CAGCCAAAGAGAAT GCTGCCGATGTTAATGGCGTAACTGTGTCC CACAAGCCA TTTC GATGGGATCGGG  
AGG GAAA ATAACGACATTAAGAGC TAAA GCAGGCATCAGATTC TC TTTAATGATCC CATCGAGATGGCA  
AACG GAAA TAACCAGCCAGCGCAGTCTTCCAAACTTC TAAA AATTAACGATGGTGAAGGATACACAGGG  
ATATTGTT CAAA CTAATGGAAGCAGTAC CAAA TACCAAATGTTACGATAGAGCAAGGAAGGATGTTCT  
TCGT GAAA AGGCAAAAT TATCAGT GAATTC TCTAAGTCAGACAGTGG GAGT CTGTATATGGAAGCTGGG  
AGTACATT GGATCAAA TAACTC CACAACCACCACAACAGCCTCCTGCCGCTAATCAGTTGATCACGC TTT  
CCAATCTGCACAAA TCTC TTTCTTC CAAA ATTAGCAAACAATGCAGTTAC GAATCC TCCTACCAATCC TCC  
AGCGCAAGATTC TCATCC TGCAGTCA TTGGTAGCACA ACTGCTGGTTCTGTTACAATTAGTGGCCCTATC  
TTTC CAAA AGGACAAA GATGATACAGCTTATGATAGGTATGATTGGCTAGGTTCTAATCAAAAAATCAATG  
TCCT GAAA ATTACAGTTAGGGACTAAGCCCCAGCTAATGCCCATCAGA CAAA ACTC TAGGGAATGAGAT  
GCCTAAGTATGGCTATCAAGGAAGCTGGAAGCTTGGCTGGGATCC TAATACAGCAAATAATGGTCTTTAT  
ACTCTGAAA GCTACATGGACT TAAA ACTGGGTATAATCC TGGCCCTGAGC GAGTAGCTTC CAAA GTTCCAA  
ATAG TTTATGGGGATCCAT TTTA GATATACGATCTGCGC ATTCAGCAATTC AAGCAAGTGTGGATGGCG  
CTCTTATTGTCGAGGAT TATGGG TTTCTGGAG TTTCTGAATTTCTCTATCATGACC CGGATGCT TTTAGGT  
CAG GGATATCGGTATATTAGTGGGGTT ATTC CTAGGAGCAA ACTC CTAC CAAA GATCATCGATG CAAA  
GTCTAGCATTTA CCGAAGTACAAA GTAGATC TAAA GATTATGTAGTGTGTCGTCCCAATCATCATGCTTG  
CATA GGATCCG TTTA TCTATCTACCC AACAAAGCT TTTA TGTGGATCC TA CAAA TTCGGAGATGCG TTTATC  
CGTGCTAGCTAC GGG CAAA GGAAT CAGCATAT GAAA ACCTCATATACA CAAA CAGAGGAGAGCGATGTT  
GTTG GGAT AATAACTGTCTGGCTGGAGAGATTGGAGCG GGAT TACCGATTGTGATT ACTC CATCTAAGCT  
CTA CAAA AATGAGT TGCCTCC TTTC GTGCAAGCT GAGT TTTCTTATGCCGATCAT GAATCT TTTA CAGAG  
GAAGGCGATCAAGCTCGGGC ATTC AAGAGCGGACATCTCC TAAA TCTATCAGTTCCTGTTG GAGT GAAGC  
AAA ATCGATGTTCTAGTACAC ATCC TAA TAAA TATAGC TTTA TGGCGCTTATATCTGTGATGCTTATCG  
CACCATCTCTGGTACTGAGACAACGTCCTATCC CATCAAGAGACATGGACAACAGATGCC TTTC ATTTA  
GCAAGACATGGAGT TGTGGTTAGA GGAT CTATGTATGCTTCTCTAACAAGTAATATAGAAGTATATGGCC  
ATGGAAGATAT GAGT ATCGAGATGCTTCTCGAGGCTATGG CAAA AGTGCAGGAAGTA GAGTCCGGTCTTA  
AAA ATATTGGTTAGATAGTTAAGTGTAGCGATGCCTT TTTCCAAA AGATCTACATCAT CAAA TTT TTTA  
GCTTG CAAA TGTTCC TATTCGTAT GGATTC GCGAGCTCTCCTCAAGTGTAAACGCCTAATGTAACC ACTC  
CT TTTA AGGGAGACGATG TTTA CTG AATGGAGACTGCGCT CAAA TCAATGTCTATGCAGGAGCTGAAGA  
AGGTTGATTATCTCAGCTAATGGCGACAA TTTA ACGATTACCGGACAAA ACCATA CATTATCA TTTA CA  
GATTC TCAAGGGCCAGTTCTTCAAAA TTAGCCTTCA TTTC AGCAGGAGAGACACTT ACTCTGAGAGATT  
TTTC GAGT CTGATGTTCTC GAAA AATG TTTCTTGGCGA GAAA AGG GAAT GATCTCCGG GAAA ACCGT GAG  
TATTTCCGGAGCAGGCGAAGTGAT TTTC TGGGAT AACTCCGTG GGGTATTCTCC TTTA TCTACTGTGCCA  
ACCTCATCATCA ACTC CGCCTGCTCCAACAGTTAGTGATGCTCG GAAA GGGTCTATTT TTTCTGTAGAGA  
CTAG CAAA GAGATCTCAGGCGTCAAAAAGGGGT CATGTTGATAATAATGCCGG GAA TTTCCGGAACAGT

T T T T C G A G G T A A G A A T A A T A A T A A T G C T G G T G G T G G A G G C A G T G G T T C C G C T A C A C C A T C A A G T A C G A C T  
T T T A C A G T T A A A A A C T G T A A A G G G A A A G T T T C T T T C A C A G A T A A C G T A G C C T C T T G C G G A G G C G G A G T G G  
T T T A T A A A G G C A T T G T G C T T T T C A A A G A C A A T G A A G G A G G C A T A T T C T T C C G A G G G A A C A C A G C A T A C G A  
T G A T T T A A G G A T T C T T G C T G C T A C T A A T C A G G A T C A G A A T A C G G A G A C A G G A G G C G G T G G A G G A G T T A C A  
A A C T C T C C A G A T G A T T C T G T A A A G C A A A A A G G C A A T A A A G G T T C T A T T G T T C A A A A T T A C A A C C A A A C A A  
A A G G C A G A G G C G G A A G C A T C C T A A C G A A A G A A T T C T C G C T T G T A G C A G A T G A T T C G G T T G T C T T T A G T A A  
C A A T A C A G C A G A A A A G G C G G T G G A G C T A T T T A T G C T C T A C T A T C A A T A T G A G C A C G A A T G G G G G A T C G  
A T T C T G C A A A A A A G A A A C C G A G C T G C G G A A G G A G G C G C C A T C T G C G T A A G C G C A G C G A G C T C T G G T T C G A  
C T G G C A A G C T C A C T T T A A G C G T T C T G A T G G G G A T A T T G T T T T T T C T G G G A A T A T G A C T A G T G A T C G T C C  
T G G A G A G C G C A G C G A G T A A G A A T T T A A G C A G T G G A A C A A C A G T T G C C A A A A A T G C T T C C G G A T T A T C G  
A A A C T G A T C T T T C A T G A T C C T G T A G T A C A A A T A A T T C A G C A G C G G C T G C A T C G A C C A C C A T C A C C A T C T T  
C T T C T T C T A C G C C T G C T G C A G T C A C A A T T A A T C A G T C C G G T A A T G G A T C T G T G A T T T T T A C C G C C G A G T C  
A T T G A C T C C T T C A G A A A A C T T C A A G T T C T T A A C T C T A C T T C A A A T T T C C C A G G A A C T C T G A C T G T G T C A  
G G A G G G G A G T T G G T T G T G A C G G A A G G A G C T A C C T T A A C T A C T G G G A C C A T T A C A G C C A C C T C T G G A C G A G  
T G A C T T T A G G A T C C G G A G C T T C G T T G T C T G C C G T T G C A G G T G C T G C A A A T A A T A A T T A T A C T T G T A C A G T  
A T C T A A G T T G G G G A T T G A T T T T A G A A T C C T T T T T A A C T C C T A A C T A T A A G A C T G C C A T A C T G G G T G C G T A T  
G G A A C A G T T A C T G T T A A A G A G G C T C T A C T T T A G A C C T A G T G A T G G A G A A T G A G G C G G A G G T C T A T G A T A  
A T C C G C T T C A A A T G G G A T C G C T G A C G A T T C C T C A A A T T A C C C T A T C T T C T A G T A G T A C T A G T A A C G G G G T  
T A C A A T G A A G C G T G T T A C T A T T A A T G A T G C A G A T G C T G C G C A C T A C G G G T A T C A A G G T T C T T G G T C T G C A  
G A T T G G A C G A A A C C T C C C T T A G C T C C T G A T G C T A A G G G T A T G G T G C C T C C T A A T A C A A G T A A T A C C T T A T  
A T C T G A C A T G G A G A C C C G C T T C C A A C T A C G G G G A G T A T C G A T T A G A T C C T C A G A G A A G G G G A A T T G G T  
G C C C A A C T C T C C A A A G G T A G C G G G A T C T G C A T T A A G A A C C T T T A C T A A T G G C A A A A A A G A A C A C T A T G T G  
T C T A G A G A T G T T G G A C A A T A G C A T C T C T G C A T G C T C T C G G G G A T T A T A T T C T G A A T T A T A C G C A A G A T G  
A T C G G G A T G G C T T T T T A G C T A G A T A T G G G G G A T T C C A G G C A C T G C T G C C T G C C A T T A C G A A A A T G G G T C  
C A T A T T C G G A G T G G C T C A A A G A C A A C T A T A T G G T C A A C A A A A A G C C G A A T G T A T T A C T C C A A G G A T G C A  
G G G A A C A T G A C G A T G T T G T C C T G T T T C G G A A G A A G T T A C G T A G A T A T T A A A G G A A C A G A A A C T G T T G T G T  
A C T G G G A G A C A G C T T A T G G C T A T T C T G T G C A C A G A A T G C A T A C G C A G T A T T T T A A T G A C A A A A C G C A G A A  
G T T C G A T C A T T C G A A A T G T C A T T G G C A C A A C A A T A A C T A T T A T G C G C A A A T A G G T G C T G A G C A T A A T T T C  
T T A G A G T A C T G C A T T C C T A C T C G T C A G T T C G C T A G A G A T T A T G A G C T T G C A G G G T T T A T G C G T C A A A A G A  
T G G C T G G A G G A T G G T C C A G T G C T A C A C A A G A A A C T G G T T C C T T A A C T A G A T A T T T C G C T C G A G G A G C G G G  
G C A T A A T A T G T C T C C C A A T A G G A A T G T A G C T C A T G C A G T T T C T C A T G T A C G A A G A T C T C C T C T T T C T  
A A A C T G A C G T T A A A T A T G G G A T A T A G A C C A G A C A C A A A G C G T G T C A C T C C A C A T T G C A A T A T G G A A T T A  
T T G C C A A T G G A G T G A A G A C G C C T A T A C A A G G A T C T C C G C T A G C A C G G C A T G C C T T C T T A G A G G T T C A  
T G A T A C C A A A T A T A T T C A T C A T C A A A G A A G A C T A T A T G A A C T A T T C A T T A G A T G C T C G T C G T C G A C A A  
A C G G C A C A T C A A A T A T C T A T G G G C T T G A A T A G A A T C T T T T A A T A A A G A T T T T C T T T T C A G A A G T G G G T T  
C T G A T C C A G G A A T T C C A A A T G T C C T T C T C C T A C A A A G G T T G T T C A T G C A T T T C G A T G A T A G G G G A G G G  
C G G A T G G T A T A G A A A A A G G G A A G G C T C T A G A A T T T T A G A G A C A G G A T C T C A A C A A A A T T C A A A C A  
A A A G G A T G A G C T T T T T T T C A T A A A A A A T T C T T T T A C G C A C G T C T A G T C A A A A A C A G G T C T T T A G C A G A G  
T A C A T A A A G A C A G A A T T A T G T T C T A G G T G A G C T C G T A A G A A G A C A T G T T G T A A G G A C A A C C T C T A T A C T A  
G G A T G G T A A T C T T T A T T T T A A T A A T A A A A A A T A C T C T G A A T T C A G A T A A A A T A G C C T T G T T T T T A T T A  
A A T C C A T C A A A C T T T T T A C A A A A T C A A G G T G A A T C A T G G C A A A T C C T T T A C G A A A T T G C T G C A C T T C T C  
A C A C C A G C A C G G A G A A C A A A C C T A T G G A A G A G A C T T C T C C T C T T G T A G A A G C A A T A G T A C A G G C T G T G C A  
A A C A T G C T T A A C C G T A G C T A A G C A C A C A G A G A A C G C T A A G G T T T A T A A T C A A A A A C G A A A A G A T A T C A T  
C A A A C A G G A T G C T G G A G A C A A T T A A A A A A T T A C T G T G T T G C T G T T G T C C A A A A G A A A G C C G G T A T C A G  
G A T C G A T T A C T G C G C T C T C G C T C T G G A T G C A G T C A C A T A T C C C T A C G C G T G G C A A A T T A G T T G T A G G T T A  
T G C G G T A T A T A G T T C A G G A G T A C G T T G G G A A G C G A T C T T G G A A G G A G A G A C T T T A T C T C C T G G A G A T A G A  
G C G C A A C T A G A T G C C T G T T T A G A G A G T G C T A A G T T A G G T T A G C T G G C A A A T G T T G A A C T A T T G G G A C G  
G A G A T T T T C C C G G C T A T G G A A C A T C G G G A G G G A G A T T C T C G C C T A G A A T G C A A G A A G A T A T A A T C G C C A G  
G T T T C G A G A C A A A G T T G G G A T C T G T G A G C T T A C A G A T G C G G T T G C T C T G A A A C A C T T C T G T C G G A G A A C T  
T A A A T G T G A T A C G C G A C G T G A G A A A A A T G A A A A G T C T T A G A G A A G G G C C T C T A A G A C T T T T C T C A A G C  
T C T A A A A C G C A A T G C T A G G C A A G G G A A C T A G A A C C T G T A A G T G G T C C C A G A T C C A G G G A G T A A C T A T G G  
C C A A A C C C A C G C A G C A C A A G A C A C A T T T T A A C A G C G T C T G A A G T C T G T G T A G A G C T C C A A A A T T C G T A A  
G C C G G A A C A T G T A G G C T C G T G A A T C C A A G T T C G C C A T A G G A G C A T C C A G G A G A C G G C A T T C A A A A G T A A

CACTACAGGTCCCATTCCACATCACGTTTCAGGTCTTGGATGTAGGCTCCTAGAAAATAATAGTAGGTT  
CGTGTTTCAAAGGATTTTTTTTCAAATGTTATTCCTATAGGAAGTAAAATAATTCGAAAAGAGCTGGCAG  
AAAAGGACC GAATCTCTCCCGAACTCTCCTCAAACCGTCTGTGTTCCCTGAAAATCCTTGCAGTTTGA  
GAAAATAGAGAAGGAGCTGAACAGTCCGGAACCATTGGATACAATAGGAATCGATGCGCACACTTCTCCG  
GATACTGCAACGCTATGCCAGGATCCGAATCC TTC TTTAGAGAAGGAGCGATATCAAATTTTGA GCTCAT  
GGATAC TTTTATTGTAGCATGCCTGTGCAGAGATTTTCATTAGAGAGGTAGCGAGTTGCGCTTGTACAGT  
AGCTATATAGGAGGTCGTTTCTGTAGACGTAATAAAGGAATCGGACGATTTCCGAGTAATTGTCTTGC  
GCCAAGCA GAAA GAATGGTCATCTAAA CTGTGAGTACTGATACC GAATAGGTAGCCAAGGCTTCTATGAT  
GCCAATTATCGATAGGTTTCCAGAGCTGTGCTGAACATA GAATAAA TTAGAAA CAGCAGATCC CCACGT  
TCCAAATAGATAGGCTCCTCCGTGCGCTGTTGTATTAATCATCGACTGCACAGCTTGCATATCG GAATAG  
GTGTTCCAAAGAGT GTTCGCAAC GAGTGTAGATTGACGTTCTGGATGAGGCACATAGTT TTTA GCGTCC  
AATTAGCAATCAGAGAATGCCCTTCATCA GAATC TTTTCAAGAAA AAGTCCAATCTCCTTGATATCCAAA  
GTGAGAAGAGAGGTTCCCATCAGGAAGATG TAAA TGAGATTGCTC TTTAGGGAGAGTAAGGAGAGGAATA  
TTGTCAAATCTTTTACTGAGAAGCTTACATTTTCA TAAAAATTCTCATCTCCAGAGTTAGAGAGGAAGA  
TCTCAAAGATAGAAA GATTAGGGGCGTGGATAGTTACGCTTTTTCAGTATCTAAGGAATGAAGGGGAAT  
ACTTAGCGTAGCTAACTTCAAATCAGAGGAAGTT TTTAAA GAAGTTCCCGCTTCCATAATGAGGAGAGCT  
TGAGGATCC TGAGAGAGAGAAGGCGG GAAAAGGACAGCGCATCT TTTAAA ACTAAGCGTCCGGATTTCA  
GTTTCGATAGGCTGCTGTAGTTGGGAAGTGAGGTTATCAGGAGT TTTTCTTCTTCA GAAAAGACGTTGCT  
CGAGAAA ATCACTGAACGG CAAA CACTTGTCT GAATAAC TAAA GGAGATGCGGTGGCTGGGGTGGGAGAA  
GTCACGCTGGCTTGCAAAGAGAGGGAAGAGGCGATTCCAAA CTGCTAC TTTCTTGTACAATAGGATCAA  
AGAAA GAATATCTCCGTTGCGAGCTTCTAAGGAA GAAA GAATCGCATCTTTCTCTAAGTAGATGGCGTT  
TCTTACTAGACCTTGGTCGGAGGTGCGTTGGGAGTTATTCTGGAACAGAACAGATCC TTTTACCTGCAAGG  
ATAGAGAGACTCCTCCGACTGGATGGCGATAGCTCCACCTAT TTTAGCGCTGTTGTTAATGAAG GAAA  
CAGGACC GTTATAACGCAATACCATGTGCTTGGCA TAAA TAGCCCCGCTTTTCTTTAGCAGAATTGCT  
TGCAAATAGCGTTTCTTGGTTACAAGCAAGAGAGAGAGCCTTTTCTGAGGTG TTTAGATCGCTGATA  
CAACAAATAGCGCCTCC ATTCGTGGCGGAGTTTTCAGT GAAAAGAGAGGGTTTACATTCCTGAACAAA  
TAAGATTACTACAGCAAATAGCGCCGCAATTTAAA TCCGCACGATTACGGGGGAAAAGAAATAGGCGACAC  
ATTTCTAGATAAAA GAGAAGG CAAA AGCCT GAATGGCTCCGCCATTTCTTTA GAA GAATTCCTTTCAAAA  
GCTGTGAAAAGATAGTTGTGCTGTAGAGAAAAGGCATCCGCAGAGATGGCTCCTCCAGAGCCTTACGCAT  
GATTTTCGACAGAAA CTGATGCTACCATTATTGCGCAAGGATAACTGACC ATTC TCAAATGAATAATAGA  
AGGAGAGCTTTCTTGGAAAGAGCAATCTGTGAAG GAAAGGAAGC GAAAGT CAAA AATG GAAA GATCTCCT  
TTTTCTTTAAA AAGAGCCTC CAAA GGGTCCGTGATATG GAGTTTA GATACGAACCAACAGTAG GAATTTT  
CAAGTACATAAAA GGATCGTCTTGTGATGCATGAGCACAAAGAGCAG GAAA GAGGCTCTCCATGGGTACA  
GTCTCAAAAAATGTACAGACGACATGATTA GGAT TTTAGTGAGGAGGGCGG TTTACCTAAGGGATCC  
TGGCCAAAGAGGACCCTGTGGATGACAAAATAGCAGCACATAGACAACAGAAGTTCATATGATCAGGTC  
GCATGGGATTC CCCCTAAGAGTCTAAA AGAAGAGGTTATGTCAAAAAAAGTAATAA TTTACAGACTTTT  
TCTCAAGGGCTCTG TTTTATGTC TTTCAAGATGAA GAGTTAAGGAAGATT CAAA GATGTGAAA TTAGA  
AAAATCAGAAT TATCAAATTAGATAGTT TTTAAA AAT TAAA TAATCT TTTAAGAAA TCTTATA TTTATT  
ATCGATTTT TTTAAT TTTAATT TTTAAA ATAAA ATAAGTT TTTA TTTAGT CAAA GGTGG CAAA TTAT  
GAGCATCGGGG GAGTAGGAGGCAACGG GAATAGTCA GAATCC CTCTCATAATGGGGATGGATC GAATCGC  
AGAAGTCAAATAACGAA GGGTAATAA TAAA GTTGAAGATCGAGTTC ATTCCTATATTCATCTCTTAGTA  
AC GAAA ATAGAGAATCTCCTTATCCAGTAGTAGACGTCAGCTCTATGATCGAGAGCACCCCAAC GAGTGG  
AGAGACGCCAAGAGCTTCCGCTG GAGTGTTTCAAGG TTTCCAAAGAGG TTTAGGACGAGTAGCTGACAAA  
GTAAGACGAGCTGTTCAAGTGTGCGTG GGGTTCAGTCTCTACAAGAAGATCGTCTGCAACAAGAGCCGTAG  
AATCCGGATCAAGTAGTCTACTGCTCGTGGTGCAAGTTCTGGGAGG GAGTATTCCTCTCAGCAGCTAG  
AGGGCTGCGTCTTATGTTACAGA TTTCTGGAGA ACTCGGGTTTTACGCCAGACCTCTCCTATGGATGTA  
GTT CAAA GAATCTTGATGTGAACGAGGCTCG CAAA ATGGCTGCTTACACAAGT GAGTGGCGGGATTATT  
TAGAAGCGCACGA CAAA GCTGGCCCTGACGGGTAGCGGCCGCCGG GAAA TTGCTCAAAGATGGATAA  
AAGAGTTAGAGATCTACAAGA TAAA GGTGCTGCACAAAATTAT TAAA TGATCC TTTAGGCCGACGAACA  
CCTAATTATCAGAGCAAAA ATCCAGGT GAGTATACTGTAGGGAATTC CATGTTTTCGATGGTCTCAGG  
TAGC GAATCTCCAGAACGTCGACACTGGTT CAAA GCTGGACATGAGCAA TTTCTCAGACGTTGTATTATC  
CAGAGAGATTC AAACAGGGCTTCGAGCACGAGCTAC CAAA GAA GAATCC ATGCCGATGTTAGAGAA TTTA  
GAAGAGCGT TTTA GACG CAAA CAA GAAA CTTGTGATGCGGCTCGTACTGAGATAGAA GAATCGGGATGGA

CTC GAGAGTCCGCATCAAGAATGGGAGGCGATGAGACGCAAGGACCTTCTAGAGCACAACAAGCTTTTCA  
GAGC CAAATAAAATGAATGTAATAGCATC GAGT TCTCA CAAAAGGAGC CAAAGAGAGCATGTGC GAGT TCTC  
TGCGCTAGAGTATCACGAGGAT TAGTTGCCGAGGAGAGGCGATTCCGCCGTTGCTTCTCTTGTG TAAAG  
GATCGACGCATCGCTACGCTCCTCGCGATGACCTATCTCCTGAAGGTGCATCGTTAGCAGAGAC CAAAGC  
TAGATTCCGCAGATGATATGGGAATAGAGCAAGGTGCTGATGGAACCTACGATATTCCCTTGGGTAGATGAT  
TGGAGAAGAGGGGTTCCTAGTATTGAAGGAGAAAGGATCTGACTCGATCTATGAAA TCATGATGCCTATCT  
ATGAAGTTATGAATATGGATCTAGAAA CACGAAGATCT CAAA CCGTACAGCAAGGGCACTATCAGGACCC  
AAGAGCTTCAGATTATGACCTCCCACGTGCTAGCGACTATGACAAA CCTAGAAGCCCATATCC TACTCCA  
CC CAAA CTTTCTAGATATCAGCTACA GAATAT GGATGTAGAAGCAGGGT TCCGTGAGGCAGTTTA TGCTT  
CT CAAA TAGCAG GAATGTACAATTATGTAGTGACACAGCCGCAAGAGCGTATTCCCAATAGTCAGCAGGT  
GGAAGGGATTCTGCGTGATATGCTTACCAACGGGT CACAGACA TTTAGCAACCTGATGCAGCGTTGGAT  
AGAGAAGTCGATAGGGAATAAA CTGGTATCTACCATAGG CAAA TATCAAAAACTAAGCCACCAAGAAG  
AAA TTTCTC CAAA GTGGGCTTCTTTT TTTATTCAAAAA GAAA GCCCTCTTCAAGATTATACCAAGATGGG  
ATGTATAATCTGAAA GGAAGGCGT TTTATTCTCTATCC ATATGATGGTGGTGGCATCC TCC TTTA GAGGA  
GCAGCAGTCTTCATGACGTTT CAAA AAGCAGCATTTCC AAGAAG TTTAGGCAGACCATAACCC CAGCGATT  
CCCGTTACTACATAAGCTGCTTGTGTCCACATGGTTCCTTACCAAGCAGGT GAGT AAGTAGG TTTA CCT  
TAT ACCCTGTTACTCC TAAAATTCC CAGTG TTTA TAGCTCCGAGAACAACAATAAGAGAAGATAATCC TCT  
ACAAAC TTTACAAAGCATGACGTCCTCCAACGTAGATGTATACTTAACTC TGACT TTTAATCTTT TTTA  
CAATTTAATAAA GTCTTTT CAAA TCTCTCTAT TAAA GATGCGT CAAA CTGTGCAAAAGACGCTTCAGT  
AAGAGTGT TTTAGTG TAAAAAAGTACGAAGGAT TTTATTCT TGTATAAGATCATGATTGACCATG TTTAG  
GATGGAAGATGACAG GAGTCATATG TAAA CAAAGAA GAAATCATCTC TTTAGCAAA GAATGCTGCATTGGA  
GT TGAAGATGCCACGTGGAAGAGTTCGTAACATCTAT GAAT GACGTCATTGC TTTA ATGCAGGAAGTA  
ATCGCGATAGATA TTTCCGGATATCATTC TGAAGCTACAGTGCATCA TTTTC GTTGGTCCAGAGGATCTTA  
GAGAAGACATGGTGACTTCCGGAT TTTACTCAAGAA GAAT TTTTA TCTAACGTTCCCGTGTGCGTTGGGAGG  
ATTAGTCAAAGTCCCTACAGTTATCAAATAGGTG GAATCGCTATGTATCGTAAGAGTGC TTTAGAAT TAA  
GAGATGCTGTAGTGAACAGAGAGC TTTCCAGTTACAGCGATTACAGAATATT TTTA TCATCGTATA GAAAAG  
TCATGACGAACAGATTGGAGCT TTTCTTTCTCTCTG TAAAAGAGCGGGC CAAA CTTAGAGCTTCACGTATA  
GATGACAAACTAGCAAAAGGAGATCC AATAGGGT TACTAGCAG GAATCCCTATCG GAGT TAAA GATAATA  
TTCCATATCACAG GAGT GAAAACAACCTGTGCTTC GAAA ATGTTG GAAA ACTTCGTGGCTCCCC AAAATTCC  
CACGGTGGTGAGACGTATAGAGATGGAAGACGGGAT TTTACTGGGT AAGTTGAACAT GGATGAG CAAACC  
ATGGGATCCACA ACTC GGTATTC CGCT TTTTCATCC TACCAATAATCC TTGGGATTTA GAACGAGTCCAG  
GGGT TCTTCAGGTGGATCC GCGGCAGCAGTTTC GCGAGGTTCTGTCTATCGCGTTAGGATCGGATAC  
CGGAGGATCGATTCTCAACCAGCAGCAT CAAA TG GAGTTGTT GGATTTAAA CCTTCCTATGGAGCAGTT  
TCTCGCTACGGATTAGTCGCT CAAA GATCCTCT TTTA GATCAGATTGGACCATTGACAACGGTGGTAGAGG  
ATGTCGCTCTGGCAAT GGATGCC CAAA CTGGTGTG ATCC CAAAGATTCCACTACGAGAGACTTT TTTAA  
AGGGACGT TTTCCGAAGCCTGTGATTTGGAAGTTCC TAAGTTAATCG GAGTTCCTAGAGGATTCTTAGAC  
GGACTGCAAGAAGATTG TAAAGAAA ACTT TTTCCGAAGCTCTGCTGTTATGGAACGTGAAGGCAGTCGCA  
TTATTGATGTAGATCTCAGTGT CAAAAA CATGCGGTACCTG TTTA CTATATTGTTGCTTCTGCAGAAGC  
TGCCACAAACTTAGCCCGT CAAA ATGGTGTTCGGTATGGTCATCGTTGTGCGCAGGCTGATAACATGCAT  
GAAA TGTATGCGCGTTCTCG TAAA GAAGGC CAAAGAAA AGAAGTAACTCGTA GAATTCT TTTA GGAATT  
ATGTGC TTTCCAGCA GAAA GACAAAACATCT TTTA TAA GAAA GAATGGCAGTTCGTGCTCGCTTAATAGA  
CGCT TTTCAAGCTGCT CAAAAGCGCTGTGATGTGATCGCTATGCCGTGATGCGCAACGCCTGCCATCAGA  
GATCAGGATGT CAAA GATCCGG TTTCTCTATATCTACAGGATA TTTA TACCGTAGCGG TAAA CTGGCCT  
ATTTA CCTGCCA TTTCCGTTCTTCCGGACTGTC TAAA GAAGGTCTCCATTAGGTGTTCAA TTTATTGG  
GGAAA GAGGTTCCGGAT CAGCAGA CAAATCAAGTAGGATACAGCTTCAGGAAC ACTCGCAAAT TAAA CAA  
TTATATCC TAAA GCAGT GAATGGACTT CAAAACGGAG GAATAGAAT AATATGGGCATAGCACATACT GAA  
TGGGAGTCTGTGATCGGTCTGGAAGTTCACGTT GAAT TGAATACC GAATCC AAATTA TTTAGTCCCAC  
GTAATCAT CAAA GTGATGAACCC AACACGAACAT TTTCTCTGTATGCACAGGGAT GCCAGGATCTCTTCC  
GGTCTT GAATAAGGATGCTGTGCG TAAA GCTGT CAAA TTCGGCTGCGCTGTAGAGGG GGATGTGCG TTTA  
TTTAGCCGT CAAA ATA GAAAATCC TATT TTTATCC TGACAGCCCAA GAAAC TTTCCAGATCACC CAATACG  
AGCATCC TATCGTAAGAGGTGGAT GTATTCGTGCTGTAGTAGAAGGAGAAGAGAAA ACC CAAA AGCTAGC  
GCAGACACATCTAGAAGATGATGCGGGGATGT TAAA ACAT CAAA GGAT CAAA CTGGTGTAGACTATAAC  
AGAGCAG GGGT TCCGTTAATTGAGATTG TTTCC AAGCCTTGTATG TTTAGTGCAGAGGATGCTGTTGCAT



ACGCCAATGC CAAA GTATCCATCC TCGGCTACATAGGTA TTTC CGATTGTAATATGGAAGAAGGTTCTAT  
CCG TTTC GATGT GAATA TTTC TGTTCGCCCTCGAGGAAGTAGGGAGCTTA GAAA TAAGGTAGAGATCAAA  
AACATGA ACTCA TTACC TTTA TGGCACAAGC CAAA GAAGCT GAAA AACGTCGTCAGATTGAA GAGTATC  
TTAGCC ATCC CAATGAGGATCC AAAAAAGTTGTTCTGCAGCGACTTATCGTTG GGATCCT GAAA AGAA  
AAAAACGGTTCTGATGCGTCTCAAGGAACGAGCCGAAGATTATATGTAT CAAA TAGAGCCGGATCTTCCT  
GT CAAA CAGATCACCGAGACTTATATTTGATGAGGTGCGTCAAACATTACCAGAGCTACCTCATAG TAAAT  
ATATGCGTTACATTACAGAC CAAA ATATCGCTGAAGA TTTA GCAATG ATTC TTGTTGGTGATCGACATAC  
GGCTCA TTTC CAAAAA CAGCAACTATGTCTTGTAAAGACTATCGTGCTC TTTC GAAT GGAT CACAGTC  
GAA CAAA CGGGCCGTTG TAAAGC TAAA GGAAGACGCTGCC ATTC AC GG GGATTC TTCT GAATGGGTAG  
CGCAATTGGTGAAC TT CATAGATCGTG GAGT GATCACAGG GAAA ATCGC TAAA GAAA TTGCAGATA GAAT  
GGTCTCTTCT CAAA GG GAAA GCCCAGAAGATAT CAAA CGTAGAC ATCC TTCTGTTGTACCTATGACGGAC  
GACCATGCGCTACGCGTATCGT TAAA GAGGTGGTTGCTCAAAAATACCGCTCTGTAGC GGAT TACAAGA  
ACGG GAAA GC TAAA GC CAAA GGCTT CAAA GTTGGACAGATCATGAAGCGAACAGAAGG GAAA GCTCCTCC  
TAAGC GAGTAAA GAAT TGCTATTAGCAGCTATGCGAGATATGTAA CAAACAGC ATCC TCAAAAAAGGCA  
TAAA AGAGAAGAACCTCTTTCATAAA ACTATGGAGAGGGTTCTCTT TTTAAA AGGC TTTATCGCT TTTC  
AATATTA TTTA CGAGAGGGTTTC TTCT CAAA AGAT GAAT CGGAAGA GGATTCCTCATCCGAAGATTTCGCT  
GCTGTCTTGTC CAAA CTCTTGGTC TTTA TTACGATGATGCTGAGCA TTTC TCTCGCTGCGAGAGAGC TTT  
ACGACGCGGCGTGTGCT TTTC GGAGAAGAAGAGG CAAAGAT GGAG GGGT TATTC CTGAGACATCTCCTG  
CAGCTACGG TTTC AAGAGCATCC ATAT ATTC AGAAGAAGAGCTGCTGTGAGAA GAATTCGAGT CGGACAG  
TTC TTTA TCGCTA CAAA GTGGAGT GTGGAAGCTAGAAGAAGAGGA GGATTC GGTATCTGAGC CAAA AGGA  
CTGACAGAAGTTA GAAT CTGCTCACTATCTGTAGAAT GTGTGGTTGTAGAGGAGAA GAGTGC ATCC GGTT  
GCATGG CAAA CAATGT CAAA TCGACCAACGGAATAGGTATATAGTTT TTTC TTCTGATTGCCCGT TTTCG  
CCAAGTCTTCCCTCT TTTC ATCAAACGAGGGGAATAGCGAACCTCTTCCAGAGCGGAGGACAAA CTTCT  
TTA GGAAGATGGCTCTCCAGGCAGCTA ACTCAACTTGTTCGAGCTTCTTCTGCTG TTTC CATTGCTCGC  
GATTACTGAGATATTGATAGGTC ACTC TATGCAGAGACATCAGAGCAAAGCCGAGAGT CATAGAGCCAT  
TAG GAATAGAGGATTTC GCTAAGATTACAGCGCTCCGCCTACGGCAATAGCAGAAA ACATCAATCCAGCA  
GCTGTCCCTGTTA GGA TAAA AGGAAGAGAGACTGCCGCAACGGTATCAGCAATCTC TTTACT TTTC TGGG  
ATTC GGCAAGATCTGAGACTAGCAGAGT GACTC CTAGGGCTCCAATAGCTAAGGCTGGAGCGATTGCAA  
TAAGGCGAGCCAG ACCCTTGTGTCCAGAGAATGAT ACTC ACAATACAGAGAAT ACTAATAGCTATAAGA  
GCAATATCG TAAA CATAGCGTAG CAAA GGGT GACGATC GGGT GCCGT CAGAAA CCT GGATAAAA AGCCCT  
TTA CCTGTTGGGGAGATTGGGGAGGGACTGGTGTTACTGGAGT CA TAAA ATTATCC CAAAAACAAAAAC  
GCTGAGTACTAGAAT CTAGTATAAAA ATAACCAAAGAGATTGGAGGGAGATAATT TTTACAAA GTCG TAAA  
GAT TTTA ACTTACATAG ATTC TAGCACTTCTTATTAAGCG GAAA AGCGTTGGGAAGGGAGGCTGACT GG  
GT CGGCAAAGAGGGG CAGTT CAGATCGGAGCAGAGGGAACGGGGAGCTTGGCAGCCGCTA TTTC GA  
T TTTA AGGGAAGA ACTTGG TTTA TGTTC TAAA GCTGG GAAA AGGT GGGTGTAGA CAAA GAAGCATGTCTC  
TACAGTAGC GAAA GCGATACTGACAGAGATCATAGG GAAAATAAA TCC TGGAGCCCAAGTGATACAATT  
ACAATGCC TACAATGGTAAGCGCTAAGGA GAAA AGGGACAGAAA GGTGCTAGAACAT ATCC GGAGCAAC  
CCT GAAA GCTTTTA TG GAATAGGCAGGAGATCAGACCTCTGATAG GAAA TACAAA TAAGCCTGCAGCACA  
AAGCACAGG GAAA GTAATCAG CAAA AGTATACCAAGAA GAAATCC TGC TAAA GAGGCTATGGAT AATGCT  
GC TTTA GGGTATT CAAA AGCTAGAGGGCTCATGTAGGCAGCGGCA ACTC TTTC AG GAAA AAC TAAATTTA  
AAAAGTGATCCTGTCTT TTTA TAGGTGCAACAGTGGAGGGCATT TTTC CAACTAGGTGTTATGTATGGTA  
AGCCCGCATTGCGGGCACAAAA TTTA TATGCGAGAGAT ATTC TGACAAAAATCGA TAAATTTGATCTA  
T TTTATTTA TAGTTAATCAGT CAAA ACTAGGATTTA CTAGCGAA GAAA AGCTTC TAAATGA TTTACAAAT  
ACAATCAGTTCT ATTC TCAAGAACTATGCCAGAAG CAAAC TAAA AAT TTTA TTAAGCAGTATGATCTACC  
AGATCC TAAATA CAAACAAAACAAGAGGAAGAACTC CCAATTC TAGGGAGATAAGCTGATTGTATGATGG  
AGTGGTATGCT TAAA GTTCTTTTC CACACGATGACGCT TTTC GGGCA CAAA TTATCGACGCCTA TTTATA  
TCGTGCGAGATGCTTGTGG GAAA GATCG GGATGAGT ACAAGAATCC TCCTCTGAGAGCTTTTTC TCAAAA  
GAGCCAGTT CAAA CAAATAGAGAACGCAAATTC AAA ACTC TCCAGATCAATCC TTAGGATATCGACAG  
GC GGAT ACCTCGTTG CAAA CTACG ATTC CCGTTACCGAGATGTGCG GAATTTCT TTTA TCGTCTCGTTAT  
TAGGAGCTGAAGTCTCTTG GAAA AGCTC TAAA GAGCTGCAAGATACAGATCCGCAAGCTGTAGGATATTT  
CGC TTTC CAAGACAAATCTTT TTTA TCAGTATATCACATTGTCTGTAGGAGCCTACACACTAGCTCTTACG  
AAT TGGCAGTGGTCTGTACTTT TTTC TGGTATGGTAG ACCCT GAAA ATATTGAGATTGGCTCAGGACTCT  
ATCAGGTAGT TTTA TCTTCAAAATATCATGCTTC GAAA TCGTTATCTGTGATTATGG GAGT CATTAAATGA

GGTAGGGCTACATGATAAGCAAGCCTGGCCTTTATTAGGGTTCCTTTATAAACCTGAAGATAGACTCACAC  
CTCAATTGTATCTACCCGGTAAATTTTCTGCAGAATACCAGTGCACACCTGCAAAAGATTTAGGAGTAG  
CATATCGCCTGACACGACTTCGTAAATAAATTCCTTAAATAATTCAAAAGCTACCTCTGAAGGAATCAAAA  
GTATTCAGGAAGAAGAAATAGAAGGGAATATCAAGCTGATTTCAAAAGCCAGGACAAAACCTCAAAATGCAA  
AGAGGCTATTCAGTAGGGAATGATAATTCATTGGCAAATGCTCATAACGAAGACGAAAAGATCTACAAAT  
TCGGTCTTCGCTGTTCCAAAAGAGCTTCTGCAAACAAAATTTCTAACAAGGTAAGCAAAATCTATTTGAT  
TGCCCGAACCAAGCACCTCATTGAATGTCAAAAAATGTGTTTTCAGACTTTTCTAATACAACCTGTCC  
CAAAATATGAAAGAAATCTCAAAAGCTCGTTGCTTGACATTTCCAGAAAGCTCCTTTTGAAGGCAGCAAAAG  
TATTGAGATTCAGGGCGTGTATGGAAGAGAAGAAAGCTTCGCGAGCTAAGATGGAAGCTGCAGCTACCA  
CCACGTCTTGTCTGCACGATGACGCTGGATTAATTCATATCCGAGCGCTTCTTGCGAACAGCCTGTAG  
AAGGACTCTCTGAAGAGGCAGAAATGGTCTGAAAATAGCAAAGACTGCTCCTGCAAGGATGAGGAGCCAAA  
TTATCGATAATAGTGGCGTGTGTCCAAGCCAGGAGGAGATTTTAAATTCCTGAAAATGGCATATAGTGCCT  
TATATTTTCTGGGAACAAGGTAATGACTTTTACACGCACAAAGCGAGCGAATGTCAAAAGGCATAAGAAAG  
GATTTTAGCATCAGGAATGAGCTTAGAATCACAAATGCTGGTATTATAAAGAGCTTCTATAGCTTGTGGG  
GAAGAAGCATATACTCCAGCAGTGCACAGAGGCCCAAAAAATCTCCTTTTCCAGATTCATCCACACCAA  
TGCGAGAACGTAAATCCGTGTGTACGTTCTGTGAGGAGAACGCAAAATAGAATCTCTGGCTCAAGGAAAA  
TTCATCAAATTCCTGAGTTCCATTTACCCTGTACTACAATTTTCCAGATTGATATACAGTGCAGCTAACG  
GTCGGAGATCTTCTTGAATACAGTGTGGGGGGGATAGAGATGGTGAACCCCTTCTTTCTAGTTGTT  
CTCGAAGTATAGAAAAATAAGGAAGGAGACAGTTGCAGAACGAAAAGAGGAGGGCATGATCACCTAAAGAAA  
AAGATTCATATTTTAAAGAAAAGGAAGAGCTGTTACCGTAGATTCCTTTCATATTCATATCCGAAAT  
CTTTATGATCGAAAAAATTTTCTGCGAAGAAATAAACCGTAAGTGTAAACGCTTGAAGAAAAGTCTAGGAA  
ACCAAAATACATAAAAGAGGAAAATCTAAGAGGCCATAATTTATTTAGTAACGACAGCCTCCCTTTCTTT  
TATGGGTAGAGAGCAAACCAGGGGAATACATGAGCGAACATGTCACAAAGAGTTATTACATCTAGGGG  
AAGTTTTCGTTTCGCAAAGAGAAAGAAAGAGCGCTTTCCTTAAAGATGTAGAAGCTGCCACATCTATTCG  
CAAACTCTGCATTAGAGGCTATAGAAGCAGGACATCTCGGAAATTAATTTTCTCCTGTTTATGCCCAAGGT  
TTTATGAAAAAATACGCAGCTTTCAAAGATATGGATGGGATAGATTGCTGAAAAGAGCATCCCTTATGTAT  
TGAAAATTTTTCAGGAATTTTCTGATCAGAATATGGACATGCTGCTTGATTTAGAATCCATGGGAGGAAG  
AAATTCCTCTGAGAAAAGCGATCCGTAGTTGGTTAAAATCTAGGCTGGGCTGGAGTCTTCGCTGATGGTGA  
GCTTGTACAAAAGTGGCTAGGGAATCTATTC AACCTTTTCTAGAACGGGTATCCACTCTTCGTAGTACTT  
ATGAAAACCAAAATATTAACGATTGTTTCTGTAGGAGAGAATCTTTTAGTTTCGTTACGCGTAAAGATTTTC  
CTCGATCCGGTTCTCAAATAATGCAGGCAGTCTTTCTAGACAATCCGAATAAGTCCACAATGGCCGGGA  
AAAAGCAAGAGCAGCTAACAGCTCTTCTCTGAAGAAGAAAATGCAAAGAGTAGGGAGCAAAGCTACA  
AAACAAGACTGTATCGGTAGCTCCTATAATTGCTAAGGAAAGAGAGGCGTCTGCAATAAACTCTCCAAC  
TCTATTAAGAATCAAAGAGCGCTGTAGTGAAGTCCCCTTACAATGATGAGAATGTGACATAAGGCGT  
AACGTGCAAAAATTTATGTGCGAGCTTTCTTTTCATCGTTTATGAAGCCACAACCACTGTTCCAGGCAA  
ACATGTAATCCCTTTTCAAGAAAATCGCATGAGCCGATCCATCAACTGTTCTGTAGATTCCTCGTATGGAT  
AGCTCTGTACAAACATGGAATGCTTTACTAGGGACGACCAGATAGTTCCATTAGGTTTTCGGTAAATAG  
CAACAGCAATAACTGTTTTTCAAATCAAATAGGCAAGCAAAGCAGGAGAGGTGGTAGTAAAGCTTGGGA  
GCCGAAAAGAGGATAGGAATATTCGAAAGAAAGTAATACTTGATCCCAACAATGCCGACTACCTCTCCT  
CTGTGGAGAGCTCGTAGCGCTTGGTTAATTGCATTCGTGGAGGAACAATCAAACTTGGAAAGATTCCTC  
GCAGTGAAATGATTTCAAATTTGAGCCGACGATTCCTTACAGGCAAAAGCAAAGCCAGCCCCGGATAGCG  
TTTAGTAATGTAAAGGAAAGGGAGCTCCAGTTAGCTTGGTGACCACAGAATAAAATGGCTCCTTCTTGT  
CGATCTAAACGTGAAAAGAAATGGTCAAGTTCTTGTGTGAGGAACTTCTTCTGAAAAGAAACCTTCAG  
GAGCATCTCAGAAGTAGCAATAGCAATCAATTCATCGATATGCAAGCGAATTTATCTACAGTTGCAAG  
CTCTACAAACGTAATGATCATCTGTTGTACGGATGGCGTGCAAATAAGCGTTCCGGCAAACTTTT  
TCAGGAAAAGCTAAAGCTAAATTAGTAAGAGCTGTTTTCGGAAAATCAGAGATGAAATAGAAGAGAGCGG  
TTCCGAGCCCCAAACTAAAGTTCGTAAGGAGGATCGAGGAAGTAATCGTAAGATGGTCAGGACTCCAAG  
ACCATAAACAAGATGATCGACGAAGATTTTCCCCCCGTACGTAATCTTTTAAAGAGCATAGTA  
TGTGTTCCGTAAGGCTAGTATGACCAAACTAGTAGTTACAGAAAAGAGCATAATGATCGAGACAGGCTCT  
ACGTAAAGCTTCTTTATATAAAGCGTGTTCAGTTGAAAACGCTCATCATAGCATCAGGAAGATTTT  
TTCTTTAGAGAGGATGACGCTACTTGAATAATCACATTTATTTCTGACGTACGCGCCGTTAAGGCATAAG  
GTTCCGCATCAAAATCAATAGAGTAAGTTTTCGTAAGTATTCCTCAAAAGCGATGTCGAATACCTGCTTC  
GTCAAAGGATCATATGTTTATTCGTCTCAAATTTCTGAGCCATAACTGCCTGAACAAAAGTATTCCTAAA

GT T T C T C G T C T A G A A A T T C T A C A G C C C A A T G A A T G A A G T G T T C T C G C T G A G A T T T T A C A G G A G G C T C C A  
T A A T A A T A G T G A G C G C T A T A T T A T T T T T T A C A A C A T C T A G G A A C A G A T G G C T G A C A T C T T T T A C A T A A A G  
C G G T A G G T C C A C A A A G T A G A T C C C A T G A T T G A G T A C T A G A G G A G C A T T C T C T T C A A G A T A G T A G T C A A A T  
G G G T T C A C A A G T T G A C T A T T T T C T A C A G G A A A A T A G A A G G A C C G G A A G A T T A A T A T T A A G A G G A A T A A  
A T T C T T G T T T T A A G A A A G A A G T C G C A A A A A A T C T G C T T G C G G A T C A T T C A A T T C C A T G T A G C T A T T G T C  
G A A A G G T A T A T A A A C T T T T T T C C A G T C T T C A G G G A C A A G G T A T A C T A C T T C A T C A A G A T T C C C T T G A G C T  
A G A C G A T T G C G G T C C A G T T C T T C A A A A G A A A C T T T A T T A A G G T T A A A A G T T A A T T C C A A A C C A T G A T C T T  
T T A A A G A A G A A A C G T A T T C T T T A G G A C C A C T T A C C T C A A A T A C T A A A T A C T T A G G C C A G G T G T C T A G G T A  
T T C A T A T C C T T T A G G A G C T C T G C C T A T G G G T T T A G T G A T A G T G A C A G A A A C A T C T T C G G T A A C A A A T T G G  
G T T A G A C G A A T G A A A A T G T C T T C C G A T G T G A C G C T T T T A A T A T T T T T A C G T A A A T G G A T G T C T G T G T C C A  
A G C A T A C T A A G T T G T A A G G A T C G A T G G T T T C T A T C C A A C T T T C A G T T C G T C C C A A A G C A C T G A T C A C T A T  
C T C T A G A T T G G A A G G G C G A A G C T T C T C A A C A A C A G A T T T A T A T T C C C T G T A A T C A T C A T G G C A A C T T T T T T C  
T T T A G C A G A C C A C A A A C C T G C A A T C C G A T T A C A G T C T G T T C C G G A G C T A G A T C A A T A A C G C G T A C A G G A A  
T A T T A T G A A A A G T T C T C G T T A T C G T A A T G G A C T G A C A A A C A A G C G C C C A G A T A A T A A T G G C A A A A C C T A A  
A G A A A C G A G T T C A A A G A G C C A A T T A C G A G A A A T C C A A G A G A C G A A A T T G A T C A T T T T T T A C G C A T C C A G G  
A G A T A A T A G G G C A A A T T T T T C G T T C A T T G C G C G T T A G G A C T T C G C A G G A T G G C T T T A A A T C T A T C C A T  
C T T T A C T C C A C G A G T T A A A A T T C C A T C A C G A G C T A A G G A A A C T G C A C C G G T C T C T T C T G A T A C T A C A A T C  
A C G A G A C A T C G G T A C G T G A C T A G C A C C G A G T G C T G C A C G A T G A C G C G T T C C C A T G G A T C G C G A C A G T T  
G T G T G G T A T C A T G A G C A A G A G G A A G A A T A C T C T A G C G T A A G A G A T A G T C T C G C C T C T C A T T A A C A C G G C  
T C C A T C A T G T A G A T G G G A G A G G G C T C A A A A A T A G C T T C G A G A A G T T C T T C T G A A A A T C T G C A T T A A T T  
T T C A C A G C A G A G A T T A A G C A G A T C A T T C A A A A G A C G C T C A T T T T C T A A T A C A A T G A G A G C T C C G A C A A  
A T C G T T C A G C C A T G C G A T A G A T G C A T G C T G T C A A A T G G T C A A T G A A T T C G T C T T G C A T A T T G A T G A C A A A  
T T T C C C T C A C G C A A G C G T A T C C T A G A G A G C A A G G C G A A T T T C T G G T T G G A A G A T A A T A A A T A C C A C G  
A T A G C C G C A A T A T T C A C T A C A T G A A G C A T C A A A T T G C G A A T A A C G G G G A G A T G A A G T T T T T C T G C T A G A A  
C A A A T A G G C A A A G A A A G A C A A C A A G C C A A A G A C G A G G T C C A T G G C G C C T G T T C C C C A G A A A A C T T T A G  
C A A A T A A T T A A G G A C C A C C C A A A T T A A A G C T A T C T C C A A C A G A G G T G T G G T G T A A T A C G T T A T A C C T A C G  
A A C A T C T A T A T A A G A T A A C C C T A G C A G T T G A A G T G T T T T C A T T A T T T T C A G C A A A A C A A G A A G C T G T A C C  
A A C T C C T T G A A A C T T A T T A C G G A T G A A C C G A A G T C A A G G A A G G T C T T A A G A A G G C C C A A A G G A A A G G A C T  
C A T C C C T A G T T T A G C T G G A A G A C A G T T A A T G G C A A A G T A T C A A A T G G A A A G G G C T G T T T T A A C A A C T G G  
T G A C A G G G A A A C G T G C A T A G T A T A T A T A C T A A A A A G A A T A C T A G A A G T T C A A A A C A A A G A G A G C C A A A T A  
T G A G T G C T G A G A T A T T G G C G A G A G T A C A G C A A A C G T T G T T T A T C G G A T T T C A T T A T C T G C A A A T C C C C A T  
T A G C A A A G G A T T A A G T A T A A T G A T T G T T C T T A T G G A G G G G C T C T A C T T A T T C A C A A A A A A A G T A T T T A T  
A A G C A G T T G A C C T G G T C A A A G A T T A A G A T T T T C A C T T A A C T C A A A T T G T T G C G T T G T C A C A G G A T T G A  
T G C A G A T T T T T C C T T C G G A G C A A A T T G G T C T C G A T T C G C A G A A T A T A C T G G A A C G T A C A A A G A A T G T T  
C C T T G G T A G C G A G G G A A T G C A A A C T T T C T T C T T A G A A T C T G G A T T T C T A G G A G T C A A A T T A C A A A G T C G C  
T A T A A A G T A T C A A A A A A A A T G C A C T T T T T T C A G C C T G T A T G G T T G C G C T C G G C G C T C A C A T G A G T G C T T  
C A A A G A T T G C A A A T G C G A A C T C T T G G A T G C A A A C G C C T T C C G G T T A T G A A A T G G T C A T G C G T A A T G G T A T  
G T T A G T T C C C C A A A T G A C T T C T T C A A A G C A G C G G T G T T G T C T C C T T C T G C C A A A C A G C G T T T T A C A C A T  
G T T G T T C T T G G C G C T T G G T T A T C T G G G A T A T T C T T G T T C T T T C T G T T A G T G C T C A C T A T C T A C G T A A A G  
A G C G G C A T A A A G A T C A A A C G A A T C A G G G G T T A A A A A T C A G C A T G T C A A A T G C T T T T C T T G T C A A A G C C A A  
A C A G C C A A A G T C A G C A G A T G T C A C T G C A A G A G G G G T C G T A A A C A C C A A C C T G C C A A G C T T G C T G C G C A A  
A A A G G T G T T T T T A A G A C T C A A G A A C A C A C C C C A A T T A T A T T A C T C G G C A T T G T A G A T A T G A A A A A G A G C  
G A G T C A T T G G G A T C C C A T T C C T T C T G G T T T A T C G C T T C T T G T T C A C C G A A A T G C A A A A A C T C C T G T T A C  
A G G A C T G G A T C A G T T C C C T A A A A G A C G A A T G G C C A A A T G T C G C T T T C G T T T T C A A C G T A T C A C T T A A T G  
G T C A T G T T A T G G G G A G T A A T G G T A C T T T T A G C T C T G A T A G C C C A A A C T G T G T A T A A G A A A A A T C T T G G A  
G C T G C A A G A A G G G G A T C T T A T G G A T A C T T T C C C T C T G T G C T A T T T C T G A G T T A T G T A A T G A A A T C G G  
C T G G A T T T C T A C A G A G G T A G G G C G T C A A C C T T G G G T G T T T A T G G C T T A T T A A A A A C T A A A G A T G C G A C C  
T C T C C T A T C G T G A A C G C A G G G C A A A C A A G C A G T C C A A A T T C T G T T T T C G A T T A T T T T T A C A A A T T T A T  
T A A G T G T C C A A A T C T C G C T T C T C A A A A A A A G A T A G G T G A G G G A C C A G A T G A G C A A G A C C T T A T A G A A G T  
A G A C A A A T G A G G G C C T T C T T T A T G G A G T T T T C T T T A G C A A C G A T T C T T C C T G T T G C A A A G T A T G T T A T T C  
C A A A C A T C G C T G T A C A A A C T T A T T C T T T A G G A G A C G G A C A A A A T T T A G G A T T G A G C A C G A T C T A T T T T C T  
T T C T A A A G A T G A G A A A G A A C G T A G G C T A C T C T T A A A C T C A A T A G G C C C C G T A T G G A T G G C A A T G A A G T A  
T G G C A A A T C A T C A T G C A A A C T G G A T T G C A A A C A G G G T T C C C G A C C G C T T A T G G A A C C T G C T T T C C A T C T

TTTACATGCCTACAAAGACTATGGTCATGCTATAACATATTCGAGGCTGTTCTCTAGAGTTTCGTAGTAA  
AGCAGAGTCTAACCGATGGAAGCTGTTCTGGGATGTTCTCTTTTCATCTCAGGGATGTCTATTAGCTTT  
TTCCTGGGACATTAGCTGGAAATTTATTAGTTGGAATTCGATCGCTCCAGATACTTCGTATAGTTCTT  
TATCTTGAAAATATTTTTCGCCCTTATCAAGTATTATGTGGGTACAATAGTTGCTGCACAACTCT  
ACATGGGATTAGTCAAACTTTAATGAAACTACAGAAGGGCTGCACGAACGCAAAAAAATAAAATTTCT  
TATGTTCTGTCTAGTTACTTGGTCAAAATATCTTTTCCTTGCTCATTGCGACTATTTAGGGATGCCTCAGA  
CCCTAGGAGTGTGCTGTCGATTGAAGGCGCTCCTGGTATGCCAGCGTATCCACTCATCATCTTATTATC  
GGTAGTAACGTTGCTTGCTGTTATGCAAAAAAGAGAGCGGTCTCTATTGGTAAATACGGAAAACTCAA  
ATTCTCTCTTGATCAACTTGTGCTCCTCAATACTTGCCTATAACATATTGCTCTCCCTAAATTTATTAG  
TATCTACGGTGGATAACTGTTATACTATGACCGTGTTTAACGCAGCCGCGAAAAAGCGAACCTTACAACA  
CCTAGTCACTATTGTTTTAATTGGGCTCCCGCAAAATCGTTGCTTACGCGATATACATATAACCAGGTGTT  
AGAGGCAAAACAGATTTTCCTTCGATTTACTAATTGCAGTAGGGTACAAGGCTCTTAAAAAGGAGCCTTG  
TATCTTGTCAAAACAAAAGAGATGGGATAGCGAAAATCACAAATTTTCCAAAAGAAAGTAAAGAAATA  
GTTGCAGCAGCTGCAGCTAGTTCGGAACGTTCCGTTCCGGTCAAAAATATGTCCATACAAAGTAAAT  
GGTGAACCTTTCCTACTAGGTAGGTGAGACCATTGGAATTTTCATCAAAATATAGACTATCTACAAAGGT  
AGGATCGCCGGTAAACACAATTCAAAATTCCTTTTCGCGCTCGAGAGATGATTGTCAAAATTTTCATGGGGT  
GTGAGGTCAAAAGCCTCGTCGATGATCAAAAATCTTTAGGTAGAGAGCGTCCCTCGGATGTAAGTAAGCG  
CTTCCAATTTTCGAGTTTCAAATTTTCATAAAACTATGCAAAGTTTCGAAAAGTCGCCCATATTATTCAC  
ATCGAATAAAAATTCATGTTGTCATAGATCGGTTGCATCCAATGCATGAGCTTCGTTCTTTTATACCA  
GGAAAGAAATCCAAATGCTTCCCATAGGAATAATGGGTCTGCTAACTAAGAGCAAAATATATTTAGGTT  
TCTCAAACACTTGGTACATTGCTGCCGCTAAGGCCAGTATTGCTTTTCGGATCCAGCTTGTCCCATCAA  
GGTCACAAGTTTAATATCGTCTCTTAGTAGTAGATCTAGAGCGCATCGTTGTTCTATGTTCAAAGCTTG  
ACACCCCAAATTTTTCGAGCAGGCTTGGAGGGATAGGATCAAAATATCTTTAGAGCTATAGCGACCAA  
CAGCGGAATAGTTATCAGAGTCGCCAGAAAGAAAAGTATTCGTTAGGAGAAGTAAAGGAGATAGATC  
TGAAGGGAAGGCGATAGAGCCATCCCTTATAGAAATATTCAAATGTGCTATTCGCTACCTTTAGTTTTC  
TGCCACGGTAAAGGGATCGAAAAGATACGATTTATTTTCATAGTCTTTAGCTTCGATCCCTAGTGCTT  
CCGCATGGACTGCTGCCAAGACTCAAAGTTACAAAACAACAGGCTCTCGTTGAAGAAATGACAAAGAG  
TAGCTCTAGCGTGAGGTGTTTTTTTCGTTTTCTCGTGGCAAAAAAGATTGACTAGAGGAGAGACTTCAATA  
CATAACTCGCTGCCGTTTTTTTAATAAAAACAAAACCAGAGGAGGGTCTTTCGACTGCTCTAGTAATAGAC  
GAATATTGCTCAATGCTCTGGAAGCATTTTTCCTGATTCATCTCGAAACCAAAAGCAGGATTCAAATTC  
TTCGATTACTGTAAAGGGATAATGATGCGAGTGTGAAAAGAGGAAAGGGCCTTAGGATCGTAAATC  
AAAACGCTGGTATCAATAACAGAGTTTTTTTTCATTACAAATTCCTAAATGACTCAAGTGAAGGGGAG  
ATAGTACCAAAATGTGTATCATATCCAGAAAATTAACATATGTCAAAATTAGAGAGAAGTCGGGAGAG  
AGGGTTTTTAGCAATCAACTCCGCGTGTGCTAATCTGCAAAATCAAAAATGTACCCCTTAACATAATGC  
CGAGAAAAGCGAGTCTTCTGTTGGAGGTTGTTATGAAAGTCAAAATTAATGATCAGTTCAAAATTTT  
CCCATACTTTCTGCTCGATGGAATCAGATAGCTTTTCATAGAGTCTTGTGATGGAGGGACGGAAGGGA  
TATTACCAAAAACTCATTTAATTGATGGAGAGACAGTCTCTATACCTAATCTAGGACAAGCGATTGTT  
GATGAGGTGTTCCAAGAGCACTTGCTATATTTAGAGTCCACAGCGCCTCAAAAACAAGGAAGAGAAA  
AAATTAGTCTCAAAATAGGAGCTATTCACAAATGGCTAAAGGATGCGAAGTACAGTTTTTTTCAAAA  
GGGCTTGGTTTCATGTTACTAGGAGGAGCTGGTTCGATTAATATGTTGTTGCAACATTCCTCCAGAACAT  
AAGGATATCCTGATCTTCCCTACCGATTTACTGGAGAGGATAGCGCAAATGATGCGTTCATTATCTATAG  
GACCAACTTCTATTTTAGCTAAGCCAGAGCCTCATGCAACTGCAAACTATTGTCAAATGGACGAGCTAC  
AGTGGAAGAAGAGGATGCCGGAGTATCGGATGAGGATCTCACTTTTCGTTTCATGGATATCTCTCAAAGT  
GGAGAAAAGATGTACACTGTTACAGATCCTCTGAATCCAGAAGAGCAGTTTAATGTGTAATTTAGGAACGC  
CGATGGATGCACATGTGGGCAGCCATACTGTGAACACGTAAAACTGTTCTTTAATACTTAAAGAAATAGTC  
CAAAGAAGACTGGCGTTTTTCAGAGTAAAGATCGAACAGTCGCGGTTGACTTTTTTCCTTTAAGTCAATAA  
TAATTCCTCTCTAGAGGATGAGTCTTCTAGAGCTGTGAATGCCCTCATTGGAGGCTCAGATTTTAGCGAA  
TTGCAGGAGTTCAAACTGCGAACGTTGTCTAATTCATGCTCATTCAAACCTTTCTTGTGGGGCAGAT  
GCCTGCTTATGTGCTGCGGATCTTTCCAAAGCAAAAGTTGAGGCTTCTGTGCGGTGATAGAGCGGCCTTCT  
CTCCGTTTACAGGAGAGATCAAAGAAAATCGTGTGCGTTTACGCAAAAGCTCCGCATACGGATAGTTTAT  
CATTAAAGAGTTATCTAAAGGTGACTGTCTAGCTGTTCTAGGAGAGAGCAAAGACTACTACGTAGTAGCT  
GCTCCTGAAGGAGTTCGTGGTTATGTAATTCGAACTCAAAATTCGATAATGTGATTGAAGGGGAGAAGG  
TTAATGTTCCGGTTAGAGCCTTCGACTTCTGCTCCTATCTTAGCAAGATTGCTTAAAGGAACTGTTGTA

GAC CAAA GGCGCAGCTCAGGGT AAGT GGATAGAAA TTGCTCTTCCAAGCAATGTGTTT TTTA TGTGCG  
AAGAAT CAAATGAA GAAT GTTGGGGC CAAAGACCTATAACAATCAAAAAGAAGGGCAAAAAAATTAGC TT  
TAGATCTATTGAGT TCCGCTAT GGAT CAAACAGATGCT GAGT TGCA GAAAAAGATAGA GGAT ATTGA TTT  
AGACGCCA TTTA TAA GAAA ATGAAT CTTGCGCAGTCTGAAGAA TTTA AGGAT GTTCCAGGTTTA CAATCG  
TTGGTACAAAAAGCCTTAGAGAGGGT TCAAGAAGC TTTCTAGCAAAA ATCC TTGGAGAA GAGT GCTGT GA  
AAGTCCCAGAGATCC AGCA TAAA GT CAAA GAAGAGATCGCTGTAG TTTCTCCAGCTGTTGAG GAAA CCC  
AGTTGTGACAAAAATAGAAGAACAAAAGGTTACAACGGTTCCTGTTCTGCTCCAGCTGTTGTTACAGAG  
CTGGCTCAAGA TTTA AGCTCTGTCAAAGGTTT TTTA TTATCGCATTAT ATCCG TAAA AAAGG TTTCTGTTA  
AGGCTCTCCTGTTATAGAAGGAAGAGA GAGT CAAA AGCGTTC TTTACAAA CTG CAAA GGT AAGTCTTCA  
GCCCCAAGAGATTC GGCATCAGCTCACTATG GAAT CTT TTTA TAGAGATGAACAGAAGAAGAAA CGAGT G  
CTGACCGGAGA ACTC GAAGTGT ATCC TCACATCGT TAAA AATAATCC TGGCGATTATCTCTT GAAA AATG  
GTGAAGACGTAGTGGCC CAAA TCTATGCTACTAGTATCGA CAAA AG TAAATGGTTAG GAAA ACCTGTAGT  
TTTA GAGT GTGTCTCTAGACCAAATAATCAT CAAA CT TTTCTCCGCTATATTGT CAAA TCAGTAAA AGAA  
GGGGCATAAGCAAGTTCAATAG GAGT CTTGTTACTTAGGTAACAAG ACTC TTTCTTT TTTCT CAAA  
CTAAGAGCTACCG GGG TTTCTGATAATGTCTCTTCCG GGATTC CTGATTGAGGA GAGTCTGGCAATTGA  
ATAGAGGCATCC TGTCTGGAAGTAGAGAGGGC GAAA AAGTCTATG GAAAAAAGC TTTAACAGCCCGGA  
AGATT TTTAGAAT AAG GGATCC AAGGCAAAC TAAA GC CAAAATTC CAAAGACTTCTTGCATCGCT CAAAT  
GTGCAC TTGTGGCC ATTC TTTCTAATGATAGAGCAGGGAACTTATTGCAAG GAAT GTTC GGGT CAT CA  
AAACAGAG GAATCC TCCTGTTTCGTCTACAAAGCTTGATGTAA CAAA CGCATGTTATAACAAGGTGC GAA  
TCCCTACAAC TGTGCTCAGAAT GGGCACATAGCTGCAAAAAGATGTCAGCGCATTACGACGAAGATAGTT  
GTGTTGTAAGCA ATCC CATGCCGGAAGCTATCC GCATTATGGGCATGCTGCAT GAAA AAAAAAGGTATTA  
GAAA AAACGTACACGAA GAATACTC CCT TAAA AAGA TAAA GCTTCTAGCT CAAA AAGCGGGGAGAAGTAC  
AGAGGCAAAAATGCGGACGTAAGA GAAAAATCACT GAAA GCCAGAGAGACATTC TAACAGAAT CGGGGA  
AAAA TTTCAATAAAA AAACGGCCTCTCCTTCTGTATGCCTCTTGGGGA ACTC GGTG ACTC GTTA CAAAGG  
AGGACAC GAAAATCC AAGATTC CCCACTAGGCAAAAACAGAAGAA GAAA CCTATGGAGGTGGAGA GAGTC  
GA ACTC TCGTCCTTAG TAAACTC CCCGCTAACCTCTACATGCTTAGTTCCCTAGGTACTATACGTTATGTC  
TCCCTAGCTAGAAA CCCCTATAGAGACTAACG ACTC TCATTAAATTTCAA ACTCA TTTCTCTCGAATTA  
AAGGACCC AAGTCTAACCAGATACATGACGGTG TTTCTGAAA ACCTCTGGTGGAGCTCGCGAACACC GGG  
TCACCCGTATTTA GTAAACAAC CAAA CTAATTAAGCAGCTACTC TTAGATCTTCGAGATCAGCGAAGCTG  
ATAA TTTCTGCATTC AGCCTTAGGTTTCGGCATTTA TTGT CAAA TCGGCTT CAAA GGAGGCCAGCCAACGCC  
CTCCGCATGCAATTAACGCTTCA TTTCTAAGTCGAAA CCTTTA CACCC CAGAGCTGAGGATTGTAAGGA  
TTCT GAGT CTTTTC CGCAATAT CAAA ATGAGAAA TCAATGTAAC TTGTT CAT TAAA AGC GGAT TGTGTC  
GAGGCAGAGG GAAA T GAAA GAGAGG GGATTC AGGCGATTATATG GGGT TGGCCTAG GAGTAAA GAGTGG  
TTCTCTCA TTTA TTGTGCTCTCTTCCGCTCGCTCGATAAGCATAT TTTAATTAACGG TTTAAA AGGC GAA  
TCGATCATA ATCC GTTAGTTAA GAAA TACCTG TTTA GAAA GCAGT TAAACTGCAAAC CAAA TAAGCAGA  
TCGATCAAAC TTTCTGAAA GCATCAA ACCATAAGT GAATAATCAA GAATGGAT AACGAAGATAAGATT  
AGTA TTTCTCGCAAAGAG GAAA AGATTC TATCTT CAAAGAAA GAGCAAGATATT TTTCAAAAAC TTTAG  
ACAATCGAGAGGGCTGCCCACTT TTTCTTTTA TGACGGGCTTCCA CAAA CTACAGGCTTACCGCATT  
TGGCCACCTGTTAGCAGGTACAA TAAA AGATGTTGTATGTCGTTATGCGTCGAT GGAT GGGCATTATGTG  
CCTCGGCGT CAAA GCTG GGAT TGT CATG GGGT GCCAGTC GAAT ACGAAGTAGA GAAA TC TTTA GGTCTTA  
CCGAGCCAGGAGCTATTGAGCG TTTCTGGTGTGGC GAAT TTTAACGAA GAAT GTCGCAAGATTGT TTTCTCG  
ATACGC GGATGAAT GAAA ATAT CAAA TGATAGGAT CGGCCGAT GGGT AGATT TTTCTGCAACATGGAGG  
ACTATGGACCTATC TTTCTATGGA GAGT GTCTGGT GGGTATTC CGCTCTCTCTATGATCAAGGACTTGTGT  
ATGAGGGGACCAAAGTGGTTCCTT TTTCTACCAAGCTAGGT ACCC CCCT ATCCAA TTTCTGAAGCTGGCCA  
AAATTATAAGGAAGTAGACG ACCC TTCTGTGCTTG TAAA CAAA CAAA CAAGACAATCAAGGC TTTCTT  
CTAGCATGGACCACA ACTC CTTGG ACTC TTG TTTCTAATATGGCGCTAGCTGTGC ATCC TGAGCTCACCT  
ATGTCCGTAT TAAA GACAAA GAAT CAGGAGAC GAAT AT ATCC TGGGACAG GAAA G CAAA CCTCGTTGGTT  
CCCAGATCGAGAAT CTTAT GAATGGAT AGGACAAT TGTCTG GAAA GAGT CTTGTTGGACAAAGTTACGAA  
CCGCT TTTCTCCTTA TTTCTCAAGA TAAA AAGGAGT TAGGGGCT TTTCTGTATTC TTCTGCAGAT TTTA TTG  
AG GAAA GTGAGGGGAC GGGT ATTGTT CATATGGCACCAGCT CAAA GAGAAGCTGACTTT CAAA CTTGCCA  
GGAACATAACGTACCTCTAGTGTGCCCTGTTGATAATCAGGGGT GTTATAACCGCTGAGGTGAA GGAT CAA  
ATCGGC GAAT ATATTAAGTCTGCTGACAAAGGCATCGCTCGTCGATTGAAGAAC GAAA TAAA CTGTTCT  
ATCAAGGTACAGTTTCGTCACCGCT ATCCGT CAAA TTGGAGA ACTG ACTCTCC TTTA TTTA CAAAGCAGT

GAATTC TTGGTTCGTTGCTGTAGAAA AGG TAAA GAGT AAGATGT TAAA AGCCAAT GAATCCATTC ATTGG  
ACTC CTGGGCATATCAAACAAGGACGC CAAA GTAAGTGGTTAGAGGGAGCTCGTGACTGGGCTATCAGTA  
GAAA TCGTTATTGGGGG ACTC CTATACCTACAAA GCGTAGTGACGATGGAGAGCT CAAAGTCATAGGATC  
TATCC AGGAACTGGAGGCATTATCTGGACAGAAGATTGTAGACAAA CATCGCCAC TTTATTGATGAGATA  
GAAA TTAACCAGAACGG GAAATC TTTC CGAAGAATCC CTTATGTTTC GATTGTTGG CAAAATTC TGGAG  
CTATGCCATATGCTCA GAATCATT ACCCT CAAAAAA GAGCAGAA GAAA CGGAGGCTTGCTTCCAGCTGA  
C TTTA TTGCTGAAGGACTAGATCAGACTC GAGGTTGGTTCTATACGTTAACCGTTATTGCTGCAGC TTTA  
TTC GATCAGCCCGCT TTTAAAAATGTAATTG TAAA TG GGAT TATTC TTGCGGAAGACG GAAATAAA ATGT  
CGAAGCGGTTGAAT AATT ATCC TAGTCCAAAAATGATTATGGACGCGTATGGAGCAGATGC CAAA CGGCT  
GTA CAAA TT GAAT AGCGTGGTCTG TAAA GCTGAAGATCTTCGCT TTTC CGA TAAA GGGTAGAGT CTGTG  
CTTAAGCAAGTTCTATTGCCGTTGCTAATGC CAAA GC TTTC TATAAGACTTATGCG GAAT TGTATGGT C  
AAAA TCC TAAAGAAA CAGACAATATAGA ACTTGCT GAAA TAGACCGCT GGATTC TTTC TTCTCTATACAG  
CAAA TTAGGGAAAA ACTC GAGAAA GTATGTCGCAATATGA TTTA CATGCTGCTG TAAA TCCT CAAA TGGAT  
TTC ATTGAAGAT TTA ACTA ACTGGTAT ATTC GTAGGTCGCGGCGACGTT CAAA GGAT GCCGAGGATTCTA  
CAGATCGACGGGCAGC ATTC TCTACAC TTTA TGAAGTGTGGTAGTCT TTTCTAAA GTCATTGCGCCATT  
CATTC CT TTTTATTC AGAAGATATGTACCAGCAATTACGAGGAGAAA CGGATCCC GAGTCTGTGCAC TTA  
TGTGAT TTTCTC CACGTTGTCTTA GAAA AGATTC TTCTAA CAAAGAAAGGAAA ATGCAGGATATTC GAG  
AGATTGTAGCTCTAGGGC ATTC CAAA CGTAAGGAGCA TAAACT GAAA GTACGTCAACCTCTTCAAAACGT  
GTATATTGTAGGAAGCCAGGAGAGAAT GGAGGC TTTA GCTCAAGTT GGATCC TTGATTGGAGAAGAGCTT  
AATGT GAAA GACGTACATT CAAA TTCAGAAA CTCCG GAGTATGTAACCAC CAAA ATTAAGCCTAA TTTCC  
GAACCTTAGGGAAGAAGGTAGGTAATCGTCTTCCA GAAATTC CAAAGAGCTCTAGCAGGAT TGCCCTCAAGA  
GCAA ATTC AGGCT TTTA TGCACAAAGGGCAGATGGTTG TTTCTCTAGGAGAAGAGACC ATTTCTTTAGAT  
AAA GAGGACATTACAG TTTCTTGGGCATCGGCTGAA GGACAAA TAGCGAGAAGCTCAGCTTCT CAAA TAG  
CAGTACT GGAT TGT CAGTTAACAGAGCC TTTA ATTATGGAAGGTATAGCCAGAGAGT TGGTTAATAAGAT  
CAACACTATGCGAAGAAA TGGGAAA TTACACG TTTC TGATCGCATTGCTATACG TTTA CATGCCCTGTT  
ATCGTTCAGGAAGCGTTTCGCT TTTA CACAAAGAGT ATA CAAA TGAAGAGACATTAACCACTTCCG TTTCTG  
TGATCGATTATAAA GAAGGGGAAGAGT GGAT ATTAACGGTCACG CAGTGTCTTTCGTTCTGGAGC GAGT  
TGAGCGTTGAGATCACTATCATTGAGCAAAAAAGAGGTCTTAT TAAA AGATCTCTTTTT CAAA CTCTTA  
AGG GAATAGCCTATGTTTT TTTCTGATAGTACCATA ATCC TATGCAG TAAAGAAA AGCTCCTAGAGCCAAT  
CC ATTTA CGAGGTAGCCAGGTAAA CTCAAGGGCGTTATATTGGAAGATAACAATCC TAGACGATTAATAG  
GCCAGAAG ATCC CAACAGGAGATCC CAAAAGAT TTTCAACGGGAACAAAACCAAATCACGGCTATCAGC  
GCTCATAGGACAATTATCTCCTAAGACAAGCACGTGGCCTTCCG GAAT TTTAAGACC GAAA TTAGTAATA  
AAG GAAA CAAATTC CTCTGTAG ATTC TGGAGGAGACCTCTGTCAA TAAATGCGATGTAAGG CAAA TCTT  
CAGATGATTGAAGTCTTT TTTCTCTTCAGACACAAT GAATTTTC TGTAAGGCAGGAT CGCTATCAA TAAA  
AACTGGA GAATCC ATAACGAACAGGTTCCCTTGATT GAAAAATGCATAGCGATTAGGGAACGGAGCATAT  
TGA GGGTT TTTA GGAAT ATAGATCGTGTG GAAA CTAATGCCGCAAT TAAATAAGTCAATGACCTGAGAAT  
TGCTTAATTGCGT TAAA GGAT GCGGCTG CAAAAGT CAAATTC GAAA GCC ACCC ATATTGAT TTTAAA CAC  
GTCTCC TTTAGAAA ATTCATAAC ATCC GTCAGGAATA CAAA GCATAGGTAGGGCAAAC ATCC TGACCATG  
CCTGAGGT ATTC ATGGGAGCAGGTTGGTACTTGTAAAGCATATCC ATCTACAAC TG TAAA ACG GGAT GTTG  
TGAGGTTATTAC GAAT CAAAT GAAT ATGTTCCCTTCC TAAA GGAAGCAAGGT TTTC ATAGGTTTCGATAGT  
AG GAAT AAGCTGTG TTTC CAAATGGACGTAAGTGA GGGT GAGGATAG GAAACATTAG GAGTGTGGGCAATT  
TC TAGGTAGGTGTCC GAAA GAGGAGAGGGAAGGACAT GAGT AAGAGCAGCTTGT TTT CAAAGTAA GGATGC  
GAACCATTGCAAAATTT TTTATTC CGAATAGATCGGCATAGCTAACAGGCTCATTATGAGGAT CT TTTAA  
AGCATAGG GAGT ATCATTATGCCAAGC ATTC TTATA GAAAAATGTCCATAAGAAGCCTGTTGAGGGAGA  
GAAA TC TTTC CACAAGGTGTGT GAAA TTGGT TAAA GATCACATCTG CAAACTCTTCT GAATGGGT AAGAA  
TTTC TG GAGT TCCGTC AAAA GAAA TATAGGGGACGTGGTAGAG ATTC TCTGTAT CAAA GGGGAAGATGGG  
CTCTCCGTCGCAATCG ATCC CATAAAA TTTCCCTCCA TAAAAATATACGGTATCTCCAGGTTTA CCC ATG  
CACCGT TTTA TATAGCGTTTT TTTCCAGGGAT GATTC CAAAATACTTAGTGTGCGGCATTAGGGATAGGAA  
GATCTCCAACAGTGAAGACTACCAGTTCTCCTC GAGT GATAGCCTCAGGTGTATAGCCAATACTTCTGTT  
AC TAAA AGGTAGCCG GAGT CCAAATGTTGT CAAA GAAA CAAGAAT ACGATCTTGTTCAA GAATAGTAGGC  
CGCATAG ATCC TGTAGGA ACTTCATATAGCTCAAACCAGAACTGGC GGAT TAAA AAAGCAAGAAT GGCAG  
CAAACGTCAAAGCATAGATAAGATCAAAGTAGCTCG GAG CAAA GA TTTAGGGAAT CTTT CAAA TATGGC  
TTGAGCTTGCTTAGCAAAAAGGGAAGCATCTTCCCT ATTC TGATCC AAAATAGCTCTTCAAGCTG TTTCC

AAGACTTCTTGTAGTTCTTCAAAAGTTTCGGATGAGAGAGCATTCAAATGCTTTTCAGCAATCTAAAGG  
AAGAATGAAGAATGCGACGACTCTTATTCAGGGAATATAAGCGACTCATGTAAGTCTCGTCATTAGATT  
TAACAGTATTTATGTTAGGAGAGACCTCTCTTCACTACTTTTCATTGTGAAAAAATTTAGATTTTTTTAG  
GGCAGGATCTACTTAATTCATATGGAGGTCTTTAAGCCAAGGTCATCTTACAATAAAGCTTTTTCGGC  
ACTACATTGAAACCGTTTTCGATGAAAGTATGAAGATGGCTAGAAATGGGAAGAGCTGGATAGGATGAG  
GCGGCTTGGTGCCCCAATTCATGGTCTTAATAATCACTGTCCCTGTAGGAGTCTCAATACTAGTCCATA  
GAGGAAACGCATAACGTTTCAATGTTAATAAATATATGAAATATTTTTCCTGATAGAGGAGAAATC  
TCAAAACCAAACAGAAATCCAAGCACTGGAAGGAAAGGTTATGAGTCTCCATTCAAAGATGTTTCGCGGA  
GACCAGGGGTTGCGTTCCTTCCTCAAAATTTTAATTAAGTGAAGGGGGCTGGAGATAAAGGGAGTTCGAA  
GGATTTTACAAAGAAAGGCAAGGATCTTTTCCTGAGAGAGGCATCCATTGCGCATTCAAAAGAACAAA  
AATCATAAGAGGATCAAAGAAATTCGTAACAAGTACACTTTTCAAAGATTGGAGTTGATGGAAGGCA  
TTCCTCCAGGAAGACTGTTCTACTAATTTTTTTTCCTGCTGTGTTAGGGAGGCAATTCAGACACTTCGA  
CCCAGTCTGCTTCTGAAGAACCAAAAGCAATTAATAAGAAATTCAAAGATCCCTCGGCTTAAGACGGC  
ATAGTCTCCGGGGCGGGCAGTTAGAATTTTTTCCTGGATTTGATGATTGGAGAGGAATGGGCTTCAGCC  
GAGGGATAGGATATGAAATATGCCAAGAAAAAATAAAACTTTAAGAAGGTCAAAGGGTGCATTTTTT  
CTTGCTTTTTCATAAAATGTTTCGGGTATGCTCTCCCTTCTGTTATGTGAGATTTTCACATACTAAGATAG  
TGATCAAAGGGTTGTCAAATGAAAAAACAACACTCATCTGAGTATAGACAAGTTCGCAAAATAGATTCCTT  
CCACTGGGTATAAGCAAACAAATGGGTCTACCTATCAGACAGATAAACAGAGGTTCAAAAAGGACAAGA  
ATACCCCTGTATGCTACGTCAGCATTTTCCTCGTCTTCGCATCCATTCCTCACAGGAAGCAAGAAGCTTGTG  
GATGCTGAGGGTGGAGTTGATAAGTCTTGAACGATACAGTGGCATTAAAGCAGTCTGCTCCTAAGCCTG  
AAACCGTTGTGGAAGATGTTCTTCCCAAGGGTAAGAAAGAAATCTCCTGCTAAGAAAGAAAAATAA  
CAAAA  
GCAGAACTTTCCTGTTATCTAGAGAAAAGCGGGGCGAACACCCCGCTTTTCAAATTTTAATAAGTCTCTCT  
TCAAAAATCTGACTTTTCAGAGTAAAGTCTAGTGTTCCTCAAAAATTTGATTGCCAATGTACACTCTGGTC  
CAAAATAGAGAGATGCTAGAGTAAAGGCAGAAGAAGTCTGTTTCATGAAATAAAAGTTTATAGAGTGT  
TTAA  
AGCGCTTGAAGAAGTTGAAAGCAGATATCCGATCCGAATATCTTTAGTAATCCATAAAGAAATAGTTC  
GCTGAGCAAGGAGCATGCGCGTCTTTTCCTGAGATTAATAATGCTCATGAGTCATTGGTTGCGACAAA  
GAAA  
ATTCCTCAGGACGATAAACTCGCTTTATCAACAGAGAAGGATCCAGAAATAGTAGCTATGCTAGAAGAAG  
GAGTCTTGTAGGGGAAGAGGCTGTAGAACGCTATCGAAGCAGTTAGAAAACCTGCTTATTCACCTGA  
TCCAGATGATGATCTCAGTGTGATTATGGAGTTGCGAGCAGGAACGGGAGGAGATGAAGCGGCTCTTCAA  
ATAGGGGACTGTGTGCGCATGTATCACCCTTAATGTCAGCAAGTAAGGGGTGGCAATGCGAAGTCTCTCTG  
CATCGGAGTCAGATCTCGGAGGCTACAAAGAATATGTTATGGGATTTTCCTGGGGCTTCTGTGAAACGTTT  
CTTGCAGTATGAAGCAGGAACACATCGTGTGCAAAAGGTTCCCAAGAAACAGAGACTCAGGGTAGGGTACAT  
ACGCTGCGGTAACGGTAGCTGTTCTTCCAGAACCAGCAGAAGATGACGAAGAAGTTTTCATTGATGAGA  
AGGATTTACGTATTGATACCTTCCGTTCTTCTGGAGCCGGAGGCCACGTCACGTTACAGATTCGCGC  
TGTGCGTATTACTCATATTCCTTCTGGCGTTGTCTGTTACGTGCCAAGATGAACGCAGTCAGCATAAAAAT  
AAA  
GCTAAGGCTATGCGCGTGTCTAAAAGCTCGTATTCGCGATGCAGAAGTGCAGAAGCGCGCGCAAGAAG  
CCTCTGCTATGCGTCTGCTCAGGTAGGAAGCGGAGATCGTTCGGAGCGAATTCGAACCTATAATTTTCC  
TCAAAACCGTGTGACCGATCACCGAATGGCTTAACCTTAATAACTTAGATCGTGTAAATGGAAGGGGAG  
TTGGATATGATTACGACAGCTCTTGTAAACCCACGTACATCGGCAGCTATTCGGTCATGAAAGAACTGCTT  
AGAGAAGCTTCAGAGTCAAATGTCCTGAGGGATTCGGTTTCCTCAAAGGGAAGCCGAAGATATCTTGA  
TGGACAAAATTAGAGAATTCCTTCTAGAAGCGCTCTCCATCAGGCGAAGTTATCGAGCGAAGAGCAAAGTCT  
TTAATTGGAAGCGTCTGCGGAAGCGAGGGGATCGTTGTCTACGGCATAACATCCACGGTAAAGTGCAATTC  
TTAGGGGTTGAGTTGCAAGTAACCCCTCAAGTCTAATTCCTAGGCAAGAAACAGAAATCAAATAGAGC  
AGATCATTGGTTATCTGCAGATGCACAAGGAGAAGACAACATTTATGATGCAAACTGTGGGAGCGGGTG  
TATTGGCAAAGCAGTGAGGAAGCACTGTCCGCATGTACGTGTTACGCTATCAGATATCAGTCTTGAAGCC  
AAA  
GCCATTGCAGAGTCCAATGCTAGAAGCAATGCGCTGCGAGTAGACTTTCTTTTAGGGGACAAACAAA  
ATCCCTTCCTTCTTTTCCTGCGAGATGTGCTTGCAAAATACCCCTCCTTACCTATCCATAAAGAGTTCAAA  
ATCAGATCCTGAGGTACGGTGTGATGAACCTTGAAAGCGTTAGTTGGAGGCGTTTCCTGGGTTAGAATTT  
TATCATCGTATAGCTACTCATATTCATAAAATTTAGTCTCTGGAGGCGTTGGCTGGCTAGAGATTTGGCT  
CAACACAAGGAGAGGATGTAAAGCAAATTTTCATGCCAAGGGAATCCGAGGACGCGTGTGAAAGATTA  
TGCGCAATTGGATAGGTTTTTTTTCCTTGAATATCAAGCTAATGATGCTGTATCCCTCTGGGGAGGTTTCCT  
GGCTTTTCCTGAGAGATGATTAGTTCCTTAATCGCAAAAATATCTAATATTTTCCTCCTACTTTTAAACCGC  
AAAGAGGGTGACAGAGGAAGGTAATTCCTGACTCCATTAGAGAGGTTGCTTAGCTCTTCTAGATGCCGAT

GTGAATTATCAGGCGGTGAAGGATTTTATTGCTAAA GTGAAGCA GAAAGTTGTTGGGAAGAAGCAAAGA  
AACATGTCTCTCTCTGGGCAACAGTTTATCAAGTG CAAACATGAAGAGCTTTCATCTTCTCTTGTCTCAGA  
GCAGACTGCTGTTTCGTTACGGGGATGCCAGCTGTTATTTTACTCTGCGGGTTACAGGGAGCGGGGAAA  
ACGACTACTTGTGCTAAGCTTGCTGACTATTTTC TTCGA GAAAAGAAGGCAAAGAAA GTGCTGGTAGCCT  
CCTGTGA CAAAAA CGTT TTTTC GGCTGTAGAACAGTTGGAAGGTTTAG TAAAAACAAACGGGAGCAGATTT  
TTTC CGAAGGGAAG GAAATGATCC TGTGGACATGGCGCGGAGGCGGTTTCAGCATGC GAAAAGCCAA GGA  
TATGATTTTAGTCTTGTGGATACCGCTGGACGGCTTCATGTGGATGATGCGTTGATGGATGAGTTAGTAG  
CTATTGCTCGTGTAAACGAGCCCCTGC GAAACCTTGTTCGTTATGAACTTAGCGATGGGACAAGATGCGGT  
TGTTACTGCAAAAGCT CAAAACGAGCGCTTAGGCTTAACAGGTGTGGTTGTGTCTATGGCAGACGGTGAT  
GCTCGAGCTGGAGCGGTGTTGTCTGTGAAGTCTTGTCTTAATAAGCCAAT TAAACAAA AAGGGTGTGGAG  
AGAAGA TAAAAGATCTACGTCTTTTACGCACAGTCGATGGCAGAACGTATTC TTGGAATGGGAGATAC  
GATCAGTCTAGTGGACAAGATGCGAGAGTGTATCTCTGAAGAAGA GAA TAAAAGAGTTAGAA GAAAAGTTA  
ACAAAAGCAACGTTTCACTTATGAGGATTTTTCATAAGCAGATACTTGTCTTTTCGTCGTTTAGGGCC CAAAC  
GTAAGATCATGAATATGATGCCAAGTCAAAGTGGTGCAAACCTAGCGATAAGGACAAAGAAGAAATCCGA  
GAAA CAAATGAAAAGAAATGAAGCGATTATTC TGTCTATGACTC CAGAGGAAC GAAAAGGAGTTAGTGAA  
TTGAGTATGAGCCGGATGAAAAGAATCGCTGCGGGCTGTGGATGACGCTAGGTGATGTCAATCAGTTCC  
GTAAGCAAATGATGCAATCTAAGAAGTTT TTTAAGGGAATGACCCGAGAGAAAATGGAACAGATGGGTAA  
AAAAATGTCTGGAGGGAATCTGTGGCGTTAAA AATTCGTTTAAGACAACAAGGACGTAAGAACCATGTTG  
TATATAGATTAGTACTAGCTGATGTGGAGTCTCCTAGAGATGG TAAA TATATTGAGCTGTTGGGATGGTA  
CGATCC TCATAGCGAGCA GAAT TATCAGCTGAAAAGCGAACGGATTT TTTATTGGTT GAATCAAGGAGCT  
GAGCTTACAGAGAAGGCTGGGGCTTTAGT GAAA CAAGGAGCTCCTGGGGTTTAGCTGAACTAATGGCTA  
AAAAAGTTGCTCGTAGAGCAGTCTTAGACAAAAAAGACGAGCTTATCGTCAGCGTCTTGCTGCAA GAAA  
GGCTGAAGCAGCTGCTAAGTAGATAAGGACATAAG GAATGGAGATAGATATTC TCTCTTTTATTC CCGGAC  
TAT CAAA CTAGTCC TTTACAGGCGACTATTTTAGCCGAGCAAT TAAA CAGGGAGCTTTTATCTGTTCGCT  
CCCGAGATATTCGAGAGTTCCGGCTTAGG GAAATGGAAGCAGGTAGATGACTCTCCCTATAATGGAGAGGG  
GATGCT CAAAATGGCAGAGCCTGTGGTACAGGCTATTAGAAGCATAAGAAGAAA GAAGTCCAAGTTCATA  
TACTTATCTCCGCAGGGACAACCTCTTTTC CGCAA GAAAAGTCTGAACTGGCGCTCGTGTTCGCA CAAA  
TATTGTTATGTGGACACTATGAGGGAATTTGAT GAAA GGGCGTTGACTGCCGAAGTGGATGAGGAGATAAG  
TATTGGTGATTACGTTCTACCAATGGGTGCGCGGCGGGCTTTAGTTCTCGTAGATGCTCTTGCTCGCTTC  
ATTC CGGGAATTTTAGGGAACCAAGAAA GTGCAGAGTACGACTCTCTT GAAAATGGATTTGTTAGAAGGTC  
CTCAGTACACTCGTCCACGGGTTCAAAGGGTGAGTCGGTCCCTGAAGTGTTC CAAA TGGAGACCATCA  
GAAGATTGCGGATTTGAGAAAACAGGTTAGTCTAGAGAGAAGCTAGAGAACGTCGACCAGATCTGTATCTG  
CAGTATTTTATGGTAACAGTGTCTGTTTAAAGTACTCAAGAGGATCTCCCTAGGATAGAGGTAGTTTC TC  
CCAAAACCTTTTCGTAGTTTTTGAAGTTCAAGATCTTC GAAAAGCTAAGAAGTTCTATTC CAGGATGCA  
AAGAAAAGAGTGTGGGACGGAGATAAAATTATTCCTTTTAGGGAAGACGAGCAAATACCTGCAACAGACA  
AAAGAAA CAAGAGGCCCGACCACAGTATTTATAGAGCTGGAGACTGATCATGATCAAATTCGTTT TTTAA  
AACGATGGGAAA TGTCTCGGAGGAGAGCTTGGTGAACAAGGGACGGGAGGGTTTCCTTTAAGACAGGTTCA  
AAATTTAGATGGCCATA CAAAGGT TGTCTCTTGTGTACAGAAA TA GAAAAGAATTTTTAGGTGAAA TAC  
AATGGGGAACCTAATCAAGGAATTGCAAGACGAGCAGTGCAGAAGTATCTCGCTGATTTCTGTGTGGT  
GACACGATTCGTGTGGCTACAAACA TTTTCAGAAGGAGGCAAGGAGCGGGTTTCAGGTATTC CAAGGAACAG  
TCATGGCCCG TAAA GCGGTGGTGCAGGAGAAA CAGTTTC TCTTCATAGAGTTGCTTACGGTGAAGGGAT  
GGAGAAGAGCTTTC TACTGAATAGCCCTAAGATCGTAAGTATTGAAGTTG TAAAACGCGGAAAAGTATCG  
CGTGCACGCCTCTTTTACAAAAGAGGAAA AACTGGTAAGGCTGCTAAA GT TAAA GAGCTTATCGGTTCTC  
GGGCTGCTAAGAAA TAG TAAAGAAAAGAGAGCGGCATTAAGCCC TTTCTGCTGTCTCAACGTCAAGAGA  
TTGCC TTTATAT GAAA TCGACCGTTGAGCAGGCGATGCTTTTC GAA GAAAAAAGCATT CAAAAGAATCAA  
GCTATTGAGCAA GGGTACTCACAAGTTGCCGGTGTAGACGAGGCTGGGAGAGGGCCTCTTGCAAGCCCTG  
TTGTTGCTGGAGCTTGTATCTTACCTAGAGG GAAA GT TTTCTTAGGTATTGATGATAGCAA GAAA TTAAC  
TCCTAAA CAAAGACGGTATCTGTACGAACTGTTGCTTGAAGATCC TGAAGTCGACTGCGGGGT CGGCGTT  
ATTTCTGTTGAGC GAATAGATGAGATCAATAT CAAA GAGGCTACCAAGGAGGCTATGGTTCAAGCCATAG  
CTTC CAAA CAAAGC ACTCCGATTT TTTATTGGTTGAC GGGTGTTC CAAACCTCA TAAAATTC CTCTCT  
TAAGATTA TAAA AGG GATGCTCGTTCGTTCCGTTATCGATAGCCGAGCTTCTATCATAGCGAAGGAATATCGT  
GAC GAGTTGATGCGGAAGCTTCATGTA GAGTACCC GAGTACGGT CAAAATAAGCATAAGGGGTATGGGA  
CAGCAGCTCATTTA CAAGCTC TAAAACA TTTTC GGCCCTGTGTATATCATAGAAA AAG TTTCTCTCTGT



GAAA GAGAGTATTC AAGAGGGAGT ATGTCAG TAAA GGTTATTTTCCCCTTTTTC TCAAGACGGGGT TCAAT  
GC TTTTCCAAGCTT TTTATCATTAGCGTCTCTGCTGGAGCAGGGAAGACAAC ACTCACCC ATATGCTACA  
AAGA GAGTTTCTGATGCA CAAA AGAAGACGGTGTCTGCAACGACACGTTCCGGCTCGTCCAGGCGAAGTG  
CATGGCGTGGATTA CAAACAAA TATCTGAAGATGAC TTTAAGCAATC TTTAGATAGGGAAGATTT CAAAG  
AATGGGTCTTTTACAAA GGACTTATTACGGAAC GAGTAAGGCGGAGA TTTCTAGAGTCTGCAAAA GGG  
TAAGCACTGCATAGCCGTGATTGATGTACAAGGAGC CAAAAGCTCTGAAGAAGCAAATGCCGGCAGTCACT  
ATT TTTATTCAAGCTCCCTCTCAAGAAGAACTTGAGCGCCG CAAA AATGCTCG GGATTCAGAGAAA GATT  
TC CAGAA GAAAGAAA GATTAGAGCATAGCGCTGTC GAAA TTGCTGCCGCTAGC GAA CAAAATTATGTTGT  
GGTTAATGATGACAAA ATTACAGCATATCAAGT TTTAAGAAGTATT TTTATAGCTGAAGAACATAGGATG  
AGT CATGGCTAGAAA AGATCG TTTA ACTAAT GAAA GACT GAAT AAGCTA CAAA ATAGCCCC TTTAG CAAA  
GTTAATTACGTAATTAAGCAAGCTAAGAACAAAATGCTAGAGGAGATGTTCTGTTCTTCTAACGTCGCGA  
TTGAGGCGCTGAACTTCTTGGATC TTTA TGGCATT CAGTCC GAAT ACGCT GAAA GAGATGATCGAGAGAG  
ACA CAAA TCTGCTACAGGAGAGAGACGAAGAGAACAAG TTTT GGAAC ATCCAGAA GAAAAGATCC TTCT  
CTGTACAACCTGGAGCGACGT GAAA TAGTGG GAAT CTCCCGTATTCTTATTACTTCTGCGTTGCCTTACGC  
AAATGGTCC CAAA CAT CAAA GACATATTACCGGTGCTTA CAAA CCTGCAGATG TTTA TGCGCGT TTTT CAG  
AGACTACAAGGCAAAGAGGT CAAA TATA CAAA TGGTTCTGAT GAAT ACG GAAT CGCAATT ACCC TTAATG  
CAGAGT TGGCAGGCATGGGGTATCAA GAAT ATGTCGACATGTATCATAAGCTTCA TAAA GATACCTTCAA  
GAAA TTGGGAATTTCTGTAGATTTCT TTTT CAGA ACTACGAACGCTTATC ATCC TGCTATTGTGCAAGAT  
TTCTATC GAAA CTTGCAGGAACCGGACTGGTAGA GAAT CAGGTGACCGAACAGCTGT ATTCTGAGGAAG  
AAGGGAAGTTTTTA GCGGACCGTTATGTTGTAGGTACTTGTCCCAAGTGTGGG CAAA ATCGAGCTCGAGG  
AGAT GAGTGTGTCAGCAGTGCAGGTGCCGATTACGAAGCTAGAGATCT GAAA GAGCCTCGTTT TAAA TTAACG  
GGGCGAGC TTTATC TTTA CGTGATACGGAACATGCTTACTTGCACAAA GAGCGCAT GAAA GAAGA CAAAC  
TTGC TTTTCTGTCAAGGTATTTA TCTACGTCCTCATATGCGTAAT TTTT GTTAC GGATTACATCGAGCA TTT  
ACGTCCTCGAGCAGTG ACTCGAGA CAAA TCTTGGG GAATACCC GTTCTGACAAA GAAA ATAAGGTATTC  
TATGTGTGGTTCGATGCTCCAATTGGTTACATAAGTGAACATATGGATTGGGCAGCATCGATTGGAGACC  
CTGAAGCTTGAAGAAGT CAAA GTTGGACGATACTGTGACCTACGCACAGTTTA TAGG TAAA GATAATAC  
TTCT TTTT CATGCGGTTAT TTTT CCTGCTATG GAAA TAGGACAATCTCTTCCCTATAA GAAA GTGGATGCT  
CTTGTAACATCAGAAT TTTTATTGTTAGAAGG TTTT CAGTTCAG TAAA TCGGATGGGAATTTTA TAGACA  
TGGATGCGTTTTTAGAAA CGTATTCCTT GGATAAAA CTGCGTTATGTGTTGGCAGCGATTGCTCCAGAGAC  
TTCCGATAGCGAATTCCT TTTT CAAGAGTTCAAGACGCGATGCAATTC TGAGCTTGTAGGGAAGTATGGA  
AAT CAAA TGAATCGAGTCTAGCT CAAA CTGTTAA GAATGGATGCACAGAGCT TTTT TTCTCCTCAATTAG  
AGCAAAA GGACAAA GAT TTTA TCTCAAATCTCAAAA ACTTGCTAA GGATGCAGCCGAACATTACGCACA  
ATACAG CAAA CGTAAGGCGTGTCCACGATTATG GAAT TAGCTGC TTTAGG GAAT GGCTATTTTCAATGAT  
GAAGCTCCATG GAAA TTGGC TAAA GAGGGTAACTG GAAT CGGGTACGCGCTATTC TATTC TGTGCTTGT  
ACTGCCAGAAGTTGCTAGCTCTCA TTTTCTATCC TATTATGCCT GAAA CAGCATTGAAGT CAAAGAAA  
GATAGCTCCATATTCCTTAGATCTAGGTTCCCAAGATCCAGATAGATTAC ACTCTC CAAAGACAGATTCC  
TTT CAAA ATTACTCGGAAGAGAAA TTTTCTCT GAAA GAGCCTGAAT TATTGTTACAATGGTAGAGTGAT  
TCTCCACGGTAATCTTACGGAGA GAAA GAGGGG TTTTATTTA TAGA ACCCTCTTTTT CAAA TGCAAAA  
AGCAATCCGCTCG GAATACATCACTGCAACTAATATTAGATAGCTTCT TAAA TATATAACCGAGGGGATTA  
TCC TAGAGACGGTCTACAATAGTGTAAAGGAGA GAAA AGAGGAGT TGG CAAA TTAAGAAGG GAGTGCATA  
GCTTGTGTCAGCCCGGTACATCGGTGTTGAACCTTATCATTACGAACAGCAATAGCAACTGC TTTCCAAA  
TTCTTAC TAAA ATGACTAGTTT TTTT CCTCGTGAATTGCTGTATAGAGTAAG TTTT TATACAGCATCAC  
GTAATGAGAGGTGT GAATAGGAA GAAT AATACAGGAGGTCTCACTTCTTGGTA CAAA TGATGGAAGTA  
GCATAAGCTGGTATCAGGTCATT GAGTCTGCTTGC GAATAACTAATATAGCGGCC ATCCACGCAAACGA  
TCAA ACTC CAAA TAGATAGGTCAATAGAGGTCACATAACCGATATCTCCGTT GAATACCTC TTTA TTATA  
GTTATTACGCG CAAA CATAACGCGATCTCCCGTAGAGAAGGAGT GAAATTTT CCTTGGATAAAA CAGTTTA  
TTAGGATTAAGTGCTGCT TTTA ACTC TCTATTTA GATTGAGTATTCCTAATACCCCT TTTTTCATAGGAG  
CAAGGACTT GAATATC CAAAGTAAA GATACCAAATTT TTTAGGAACAAA ATCCGAAA CGAGAT GAATGAT  
GTG TTTA ATCGCTTCTT CAGGGTCTTCTT CAAAAA AAA TAAA AAGTCTTT TTTT CCTGAAGAGCTGTTG  
AGAACC GGGAATTC TCCTTGG TTTA CTTA TGGGCA CAAATAATGAT ATTCGAAT CAAA CAACTGACGGA  
AGAT TTTT GTTAGGTAGGTTACCTCGATGTGATGG GAAA GAATAAGATC TTTA AGGACATTACCAGGGCC  
TACGCTGGGAAGCTGGTGCACATCTCCAATTAGAAT TAGGATAGCATGATCAGGCAGTGCAGCTA GAAA  
CGTTGTAAGAGAAT GGTGTCGATC ATTC CAGATTC ATCGACAATAACAAGATCACAAATCAATAGGATCTT

CGTGATTC TTTTCGAAA TGACAAGGT CAAAAA TCATACTGGAGAAGA GAGTGGATAG CAAAAGTACG TTT  
CCCTGTGAT TTTCTGTCATACG TTTTCGCAGCT TTTCTGTAGGTGCTGCTAGGAT TAT TTTCTTAGGGGAG  
GAGATCT TTTCAAAGATA GAAAAGGATAGCACGTGTAATTGTA CT TTTCTGTTCCTGGTCCCCAGATA  
TAATATGAATCT CAAA TGAAGAGCTGGCATGAAGAGCTTCTT CAAA TT TTTCTTCCAAT TTTAAA TCCAG  
AAGAT TTTCAACCTCCA GAATCGTTCCT GGGTATTGATAGATCGT ATTCG TTTA GAA GAAAACAAGAGT  
CTTC GAATATCAATCGCAA CAAA TTGTTTCAGCTA GAAA AAGTTGGCGGACCAAATATAGGTATCTTGT  
CGAGTTCCTTGACATAGACTGTCTTCTGGCGTGACAA GAAAT GGA CAAAGGTAC GGA TTTCTC TTTCTCG  
TATGATCTCCTCTGGAGCTTCTTC ATTC AACAGTT TTTCTACGAGAACAATAAA ATCATTAAAGAGGGT  
CAGGTATGCCCTTCTTCTTGAAGTTCATCTAGA GAGTATT GAATTC CAGCAACGATACGATTAGGGGAAT  
TTA GAGGGACTC CTAAGCACGTAGCAATAAGATCAGCGGT TTTAAA ACCTATACCGTACAT TTTCT CAAA  
AAGCA GAAA GGGATCTTGACAGACCTTCTCGATCG CAAAAT CAAA GTATTT TTTA TACAGCCG TAAA  
TAAT GAATGGCT ATTC CATGTGCTTGT A GAAA TAACAAAGCATGACGTAGGTCTC CAAA CTCTTG  
GAGTT GCTTA GAAA AATCTTCGCAGCGGGCAGGA GAAA TCC CATCTACTTCTACCAAT TTTA GAAGGACAG  
GAATC GAGTACTGTTAACGTGTCTTCCCCGAAGGTTGAGACAATTT CAAA AGCAAG CAAA GGCCTACGCCCTTG  
ACAAA AGC ATTC AGGTAAGCTATGATTC CGGAAT CAGGACTATAGGTTGCAGCGGAGG TAAA GC GAAA CA  
CTAATGCTCCGCTAGCATCTAC ACTC CAATGACCTGTTAAGTCTACAGAGGAGCCGAT CAAA AACAAAGA  
GAGCGGGAGATGGCCACAAACAGTTACTAGT GAAT T CAAA TAAGGG ACTC GTAGGAAGGCGT ACCCTG CA  
AAATCGGACAGG GGGATCTTCTGGCAG GATCAGCTCCAAAATACCG GAAAG TTTCTCTTCAACCCATAT  
CTT TTTA ACTCTCTTGGAAGTATTC GATT TTTAGAAA GGCTTAAGTTCGGTGTGCGACAGCATTATAGATT  
CTAATAAGGCTCCGATCGGTATTT TTTATATTTA ACCCACAAAAGAAGTCCATG GAAA AAT GAAAC TTTCT  
TCAGAATGTT TTTA GAGGATTTAAA GCGACAAA GTAGGC AAAAGCAACC TTTAAA ATACAAACGAATC  
GCT TTTAAA GAGGAT CAAAAAATCGGTAT TAAAAT TTTA CAAA CTTC GGATTC CGTGGTTATAAG GAGTTT  
CTGAAGGAGTTTCTGTTCACTGGCTTT TTTCTGAGCTAGAAGGAGACAGAGACTAGCTCCTAACATCAG  
AAA GAACCC TAAA CCTTCTTG GAAA GATGGCAT TTTCTCG TTTA CATAGGTAA GAAA GAATCCATCC AAAG  
ATGGGT TCAAAGATAAGAAGAGCCCC TAAAAGAGCTGTAGACAGATGAAGAGAAGC CAAATTC CAAGCTG  
CGATAGCTCGGAAGAG GAAA AATCC CATAGCAGAGCAAAGAACGAT GAATAGGCATCTTTCTG GAAAG  
AGGGGTAT GAAA TA GAAA ATTAC GAGT GACAT GGGT AATACC GAAA GTATCTCCTAAGATAATTAATGGG  
AGACAGATGATGAGAGAGCTGATCC TAGCATATGGCACCATGTGTGCGGGGAGAT TTTCAGAAT GTTGCT  
CGAGAAA GTCATGTTATAGATGATGT ATCC AGCCCAAATGCTAGTCGCTGCTGTGACACATCCGAATCC  
TAAGAGGTAGAGAGGCAGAGAAGA ACTGGATTCCGAT TGGAAATTC GGAGACATTC GACAGAATGATTCCA  
ACTACAATGATGCC ACTCATACT TAAA AGAAA TGAGTAAGAGAGCATCTTTTTC TTAATATTG GAATAGA  
AGAGAATGGCAATAGGGGCTAACCCAGCAATGATCAGTCACTGCAG ATCC TGAATAACGTACAGCTTG  
TGCGATACC GAAA TAATAGGCTATGTTAATAA GAAA GGCCACAGGATGCCTTT TTTCTCAGAG GAAA AAG  
GGAATGT CAAA AAGATATTAGAACG TTTATACAGAATAGTGATCAGCGAACAGATTC C GAAA AC GGAGT  
AGC GGGT CAGCACAATATCTAGGTCAGCAAAGTTCCCTAGCATACTAG GGATCAC GAAA ACCATTC CCCC  
GTAGAAGCAGGCTAGGAGGCTATAGAAG ACTC CCAAAGGTGTATTACGAGAAGAGGACATT GGATGAGGG  
GAGGACATCATGCT TAAA AGGCTCTCCAGCT TAAA AACTGCGCTCTAA GAAA TTAC TAAA TAAA GGACT  
TACGAGAAC GAAA GTCAGG TAAA GACAAAA GAGT TGG TAAAAAAGCCTCTCTTT TTTCTCCTCTTCG  
AAA AGGGAGCTTTA GCC GAAA GGACCATTACAGGGCAATTAT ATTC CCA TAAA GATT TTTCTG TAAA CAG  
TACCAAGAAGGGCTA TTTACTGT CAAA AG TAAA GAT TTTAAA CTAT TTTCA TAAA TGG CAAA AAGTTCCCT  
TATA GAATCAGAGT TGA TAAA GCGTTTTT CAAA GTATAATGAGAAA AAGCTT CAAA TAAGGCAAAGAGAT  
GAAGCGTATCTTAGTGT ATTCGGA TAAA GAGT TTTCTCCTTACTA CAAA CGCCATACTGTTTCGCTGGTTG  
AAGCAGGTAGCTGCTCC ATTC CAGATGGAGGTATGTCGCGT GAAT GGACG TTTCTTTG ATTCATGAGCCTC  
CAAA GGAA GAAA CA ACCAGCTTCTTGTA ATTC CAGGAGGTGCTGATGTACCTTATCATAATGTGTTGCA  
TGGACTGGGGACAGCGCGTATCGATAACTACGTAAGAGAGGGAGGCTGTTACCTAGGTA CAAA CGCAGGA  
GCTTAT CAAAGTTGCGCGCG GAAA AATTTCTAGAGCCTACAGGATC TTTACAAA TTGCTAAGCGAGATT  
TAGGTTT TTTCCCGGAGCTGCTAATGGTCCTGCTTAT GAAA GCGCT TTTCTTATAACAAGTTCCCTCTGG  
AGT TTTA GCCGCTCCACTAGT TTTCTGCTGAT TTTCTGAGAGAG TTTCTCTCTT TTTAATGGG GGATGC  
TG TTTCTGAAAATGCGGAACAT TTTCTCC GAAA ATATGCATCGAGGCGGCTATAATAATCTTCTTG GAAA AC  
CTGCAGCT ATTC TCTCCAGACGCCTCGATAAGGGGCTAGTCGTGC TTTCTGGTCC TATATAGAGTACCT  
CCCAGAGT CAAA CTCTTGCAAGAAGATAATGTT ATTC CAGGCGAGAGAGCAAATTCAGCACATTC TTTCTG  
AGTCTAGAGGAGTACAAGCAGTTCTTA ATCC ATCGTCTATT GAGT AATGTCGTGAGCACGT CAAA TAT T  
AAAATGCTCTCACCTC CAAA AGGATGTGCTTCTCAGCATCAAATAAGAACGGTTGCATTGTCTTAGTA

GACCCAA TTTA TCTTCCTCTTCTAATCCAGAAA TAATAATGGTGGTTAGTGCTGTCTCGCTAACAGGTCG  
TACAGGAGATAGGATACGCATATTCGATACATTACCGGGAAGCGTGTAGTGTGCTT TTTTCAT GAATACA  
G TAAAGAAA TCTTCATAATCCAACGGGAATATGGGAGC GAGTTTC TTAGTTCTCCAATCCGCAACT CAAA  
TATAACGCAACTGTTT TAAAGCGCA GAATAGTGCTAGCAACTC TAGAGTGCGTGCT CAAAGTGTGTGCAG  
AGGAGT CAAAAGGGGT TCTAGCAA TAAA ATCTCATTAGATAGGTTGTGTTCTATGATCTGTGCATAGTGA  
C TAAA GAGT TTT TTTAAA GAGCTCTTCTTGTGTCAGCTGCTTGC TTTC CT GAATA GAAA TGAAGAAGG TTT  
CA TTTTC CTGTATCATAATGTTGTTGTAGA ACTC CTTC CAAA GCTTCGCGCATAACAGGAT TGCCGGAAGG  
TAATTTGGTGTGCATA ACCCACTC GACAGGTGAGAGCATTGGACTTGATGAGATAGGTATGTAGCG TTTC A  
AAATCC AGAGTGGAT AGTGTGAGGGA GAAA GGCAAAC TG GAGT GCGACAGGAT AATGGTTCGAGGTTGCC  
CT GAATCC GAAGGGAT GA CAAA TGGTGTCCAGTCTG TAAAAGCTGCA GAAA GAAGCT TTTTC TGGGT GATC  
AAAGAAA AACTT TTTA TA TTTA GGAGAGGCGCCCTT GAAA CATTCT TTTA AGCCA GGATTGGGGT ATAGG  
CTT GAAA TGCT CAAA GATTCCGTT TTTAGAAA ATCAATGAGAGAAGATGAGAGAGAGGGGATGGAT TTTA  
CATACGACATCAGATGTT GAATTC CGTAAGGGAT GAGCTTCTGAC ACCAAAAAACTAACCACG GAAAC  
AAGCAGAGCAAAGCAAAGTCCGGAGGCTAT GAAA GCCGGCGGGCCAGCAAAAAG GAATCC ACACGATGCG  
AT GAATCC TATAATTAAG GAAA ATAACACAGAAA AAATCACA AAAAGC CAAA GTTGTATCT TTTTC AGCAA  
CCAAAGAGAGA ACTTG TTTAAA AGAAGTCTGTAGGGT GTGACATTCTATTGG GAAT ATAGATGGTTAATC  
CTCTCTAAGAGT GCAATGCAACGC ACT TTTTC ATAGGGACT TTTTC GTA TTTTC TGAGGCCTCAATGATGCCA  
AAATTTGAGGAG TTTAGAAA AGTCGCCCTCGACAGTAT ACTCCCTTGGAGCTTT TTTA GCACAAA GGC TTT  
C CTGTATTACGAGAG GGGT CGATA GAATTTTT TTTA AT TTTA GCT GAATTAGAACGCTATTTTC GCGGTGC  
AGTTGGTCTACCACCAAGAGT TGCAAACCAATTGG GGGTGAACGG GAAAAAT GAA TAAAAAAGACTCCA  
TCACCTTAACGATGATAAGAA GAAA CTACGGAT AATG CAAAGGAT CTATAAGAGA GAAAAAAGACTCCGG  
AGGATGGGT TCGAACCAACGACCAAT GGATTAACAGTCCACTGCTCTACCCTGAGCTACTCCGGAACAG  
TTCAAGCTACATTCTGCATGAGAAGGTAATAAAA AAGTCAAGCAATTGCGAACAAAGATT TTTA TTTTC GAT  
GATTTTC TTTTC GTTT CAAAAGAGT TCTGGAAGCAGATTT TTTTC ATAACC TTTA AGCACCAAACCTAG TTT  
ATGAATAAGTGCTAGCTCAATAAC TTTTCGGAT CATCC CAAGAAGCCAGATGGGT GCTCAACTCTTGCTGT  
TTCTCGAGAGCTTCT TTTAAA TG GGAT TTTAAA T GAAA CATGCGCTGCTGTAATCGCAGCTCTGTGTGC  
ATAGTTGGGAGATGGCTCTGTGCATAGACAAAACCCTCCAAGAAGACAAA GAAT AAGCCACCAAGAACG  
AATGACACATTCTTCCATATACCTGAACCAAGAAGTCTGTTTC TTACTTGCCATACTCGTCCAG GAAACA  
TAGGGT TAAACAAACG GAATAGTAATCC CTTGTTGTT CAAAATA TTTTC CTTGGCGTTCTGCATAAGATA  
CATCACAAGCAGCATCTCCTTCAAAGAAGAGCACTTGCGCGATCC CTTTATTAGCATAGAC TTTTC GCTGG  
AAGTG GAGTAGTATTG GAAA TCTCGATAGTTACGT ATCC TTTCCC ACTC AGGTTCAAAG GAGTGACATTC  
ACAATCAATCC ACAACGTGCGTAGTTGACTTTCCAATACACACAGTAAGGACATTACGAGGGATAC GAA  
AATATTC CACGCTGCGAGC TAAA GCAAAG GAGT TAGGAG GAAT GATACAAACATCATCCACGATG GAAAT  
CAGCGCATCTTCTG TAAA ACAT TTTTC GGAT CGACAAGT GAAT TGTACACATTGGTGAAGAC CAAA AATTCT  
CTCGATATGCG TAAA TCAT ACCC ATAAC TTGACAAGCCGTAGCTAAT GAGT TTTTC TCCAGTCTCTGGAT  
GCAG TTTTC ACTTGACTGTCTGCAAAAGGCTCTATCATACTTCTTCGATTGCCAT CAAA CGAATCCAGTT  
ATCTTCCTTAATTC CCA TAAATTC TCTCGACTG CAAA TTATCTATA TTTTC TAG GAAA AGAC TTTA GTTAG  
AAAAAAGAGAT TAAA ACTCTCAACACTACAGCATGTGCAATTGTAT GAAAAGACGCAACTT TTTA ATGCC  
CAAA TGCAGAGGTTTT TTTCTTTAAA TAGTCT TTTA TATAGAGAAA AAGAAGGAT TAGAGATAGGGGAAT  
CCCTCTTGACTTCAGCCGTTGGA GGATGTCAAAAATACGATTTCTTGGA CAAAGAT TAGCGAATAAA TAACT  
ACTATTGC GAAT ACTTATATGACTCATAAAA TTTTC TGT TTTA CATCA GGATAAAA AAG CAAAATT TTTCTT  
TAAGGCCAAAGAAA CTAACAGAGT CAAA TGGGCAAAAACAATT GAAA GAACGATT GGATTTATTTCTTCG  
AGCTGCTGTCCAACG GAAT GAAGTCCCCGACATTG TTTA TTTA TGGTCCCCCAGG CAAAAGGT AAGACT  
TCGCTGGCACATATTATGGCTAACACGATAG GAAA AGGCTTGGTAATTGCTTCCGGGCCGAGTTGT TAA  
AGCCTTCCGATCTCATAGGACTATTGACCGGTCTACAAGAGGGAGATATTTT TTTTC ATCGAT GAAA TCCA  
TCGCATGGG GAAA GCTGCTGAA GAGT ATCTCT ATCC TGCCATGGAAGAT TTTAAA GTAGATATTACCTTG  
GATTC AGGTCCCGGAGCTCGCTCAGTGCCTCTCGA TTTAGCTCCA TTTAC CAAA GTAGGTGCGACC ACTC  
GCGCTG GAAT GTTAAGCGAGCC CAAA CGTACGCGT CAAA CT TTTA CTGGGCGTGTAGATTACTATACTGA  
TGAAGATCTTG TTTTC CATTCTTTTC TCGTTCCTCTCAGTTGCTCGCCATAGAAGCCAATCAG GAAA CTCTA  
TTAGAGATTGCTAGAAGGGCTCGAGGGACACCAG CAAA GCTAATAA TTTA CTTCGAT GGGT GCGTGAT C  
AAA CTCAAATGCGAGAGG GAAA TTGTATTAATAGCGCCGTAGCA GAAA AAGC TTTA GCTATGTTATTAAT  
AGATAACTTAGGGT TAAA CGAGATTGACATTAAGCTTCTCTCCGTGATGATTGATT TTTA TCAAGGAGGC  
CCCGTTG GAAT GAAA ACGCTCGCAATGGCGGTAGGGGAAGATGTCAGA ACTCT TGGAAGATATGTACGAGC

CCTT CAAAATCAAAAAGGGCAAA GTTCAGCGAACCGCAAGAGGAC GGGTTGCAACCC CAAA GCATATGA  
ACATCTTAACAGGA ACCCTAAGGACAGGTGGGAGAA GAATAAA GTGAAAAAAT TAAA TCTACTC GTACT  
GCTAG GAGT TTT CAAA TGGTGTAAAGCGGTGTTGGAGATGCAGATGT TAAAGTATCC GATGCCCTATCGCAA  
TCT ATTC TTGTGCGAACCAAAAATCCGAGT TCT CAAA CTCAGT GAAA GACTACAGC CAAAATTGAGGCTA  
AGGGAGCTT TTTT CAGT ATTC GGAGATGGT GAGCT TTTAC GGG TTTT TCTCAAGGACAACGTTGTGCGGC  
GCATGC CAAA TATGGAGGC ATTC GTTGGGAGAGA GAAT TATCC CAACGTT GAGT GTC TAAAAATCGAACCT  
CTTGATGGAGCAGCCTCGCTG CAAA TTAATGGT ATTC CAATACAA GGGT GCTATCTAT ATTC ATAGAACGG  
ATCGCAGCTG CAAA TTCATAGTGAACGAGCTCGCGGTAGAAGACTATC TAAA GTCC ACTCTTTT CGTAAA  
ATA CAAA AAGGAAT TAGATAAGGAAGC CAAA TCAGCTTGTGTGAT TTTAGAGAGAACGGCTC TTTATGAG  
CGTCTTCTTGCTG GAAA TTTTCATAGCTTCTGGCATGTCAATGCTCAAGAGGAT CGTTATGGAGGACAAA  
GTGTTACGTCGCAGT TTTATGGTGTAGAGGAGGCTGTAGACTGGACCTCTCGATTGGTTCTCGATAATCC  
GGAAGGGCTAGTG TTTAATGCAGACTATCTATTGCGAGCAAATGTAGACCACTTAGCTATAGAAGGCTAC  
AATGCTCGGCAGAT TTTAGAAA AATTC TA TAAA GATGCAGATCTCGTGGTGATT GAGT CTTGGGAAGATG  
ATTG TAAA GGTGCTTAGAGGCAT ATCC TAAGAAGCTTGGTAGCAAAAAG ACCC ATCTCTAATGAGCT GGG  
TCTTTT TTTATCTAG ATTC CAAGGAGGTT TTTT TCTTGCTGATGGCTACCAAAGAGCTATAAGGTTCAAG  
AGAGAG CAAA GGAGATAATATCTGA GAAA AGAATCC TGTTGTGCTATCTACAATTT TTTT CATAGGCCAAA  
TGTTCT TTTT TAGG TTTAGG TAAA GAGATCTCAATACGTTT ATTC CCACTA TAAA ACGCTAC GAA TAAA C  
TGTAGTTCAGGTG TTTCAACTCAAAAAGCTAGATAATGATCGGCTCCCC ACTCTCTGGGAGAACCT CAAAT  
ATTTA GCCAGGTAATCGTATCTTCTGATAAGAAA GAGGTATT GAATAATTC GGTATAAGC CAAA CGCAGA  
GCAATGACTTGGCATAA GAAAGAAA ACAGTTC TTTT CTTTC AGCTAATCGATCC CAAAGAAA GTAATTGA  
TCTTAGTGTCTAAGCACCAGTGATTATTA TTTT CATAAGCTGTGTGCCATATTC ATCTCC GGAT TGTAT  
CATGG GAATTC CTTGAGAT TAAA AAGAGAGCAAGAAA GAAGTT TTTT CAAA GCGTTCACGTAGAGCGCAA  
ATGGTGGGATCTGTGCG TTTT TCCTTCGCAGCCAAAGTTATAGCTATAG CAAA CTGAAGTCCCATCACGAT  
TGT ATTC ACCATTC TCTTCATTGTGCTTATCGTTATAGGCAACAGTATCGTAGAGT GTGAAGCCATCATG  
AGAGCAGATATAGTTAATC GAGT TCGTAGG TTTT CCATTGGGAT AGATGTCATGAG ATCCAGAT ATTCGT  
GAAGCAAAGGAACCTACTTGATGAGCATCTCC ATTC AGGAAGGCT TTTA CATGGTCACGGTAGCATCCAT  
TCC ACTC GCCTCCATC GGGT TGATATAGAGGGGAAGTGTCCAAGCTGATACAAACCTCCAGCGTCCCAAG  
TTCAGCGATCAG TTTAG TTTT TGA TAAA ATGGAAT CAGAGGAT ATAGCTTGCAAAAATGGGGGT TAAA GGG  
AGAGGG ACTC CTTGT GGAT CTCTAGAGAAGACTGAGGC TAAA TCAAAC GAAATCC ATCTACGTGCATTT  
CTGT ACCCAGTACCGCAAAGCATCAAGAATCC ATTT CAGAGT AGTGG GGGT GTTGGTATTGACTGTATT  
ACCAC ACCCGGAG GAAA TTCATGAG ATCC CCATGATCATTGACCATATAATAGGAT TTTAGATCT ATCCAG  
GGAAGAGGGCAGCTTGTGCCTTCAAAGCCTGTATGATT GAAA ACGACATCGAGAAT GACTTCG ATTC CCG  
CACGGTGTAAACGC CAAA ACAAGAGT CTTGAACTC TCGGGCCGGAGCGCAAGGGT CTGCCCCATAAGTATA  
ACGGCGAGAGGGGCAGAAA AAATTC ACCGAAGAATACCC CCAATAGTTACACAGGTGGGGGAAGTCC TGA  
TT TTTAAA TGGAT GGACGG TTTT ATC GAATTC GAAA ATAGGAAG GAGT TCAACTGCATGAACGCCTAGTT  
G CAAA AGGTGGTCTATTT TTTT GATGATACCAAG GAAA GTTCCAGGATGG GAAA CCTGGGAAGAC GGATC  
TC GGGTGAAT GACCGAACATGCA TTTT CATAAA TGAAGTAAT TTTT TCAAAGAAGGTGCAAAG GAGTGTGCG  
CCTTCCAGTCAAAA ATCC TCATA TTTT CAGGTAAC TAAA TGCGTAATCCT TTTT TTG TTTAGGGGATCCAA  
ATAGTTGAGGG GAGT TAGAT ATTC TTAGAATAAGGGT CTGCGATGTAAGAAT CTGTAGCAAACCT CAAA AGA  
GCTCAAGTCTGTACCACGTAG TTTA TAAGCATAACGACC ATTC ACTA GAAATGCCTGCAAT TTTT GATATGC  
CAGATGGCTCCAGTCCGTGTGGTGGTGTAGAAAGATAGAG GAATTTT AT GAATTTT CAAA GAGGGT CTAATA  
GTACAA GAGT AACCTGCTGGGCTTGTGAA GAAA ATAGA GAAA AACGGTAGCGATCAGCGGAGAGCTT CAA  
AGCTCCTAGAGG TAAA GGAT AGTGGAACGAACAGACAAAG ATTC CA TAAAAACTAGAACAAAGTAAG TTT  
AATAAA AATCTAACCGAAGAAA TGAAGAGAAGAGGGGGGGGGCT TAAA CACAAAAGGAAGAGAG ACCCTC  
TTCTT CAAA TTGTATGATAGCAAAA CT TTTA TGCAC GGATTC CTGCTGGAGGAGGTT GAATTC CTCCGCC  
ACCC CTTGAGGCA CAAA TGGCATGGTATCAACAGT GGGT TCTCGTCCAGCGCTGATATCAGAACAAACA  
GTTTCGCCA TTTT ACAACGG TTTT CA TAAA AAGCTGTGCAAAAAGC CAAA AGTAGGTTGGTCTCTGCATACT  
TCATGTCTAACACGCAGTGCATTAAGATCAACTGTTCTT TAGTAGCG ACTC CT ACCC CTCCACCAGCCAC  
AAA GCC TCCGAGCATAGAGCCTTCTAACA ACTTCTCATATAGAGCTAAC TTTT CAAA C GGAT TGTCTGGC  
AGTCCGTCAAGAAGAGGTCG TAAA CA TAAA GCGGATCA GAGT GTTCTTCGTAGGTCAGGTGAAGA GAAA  
ACTC TCCATCAACAAA CAAAATGCACGTATT ATTC TGATCGAAGGCCACGTCCGGG GAG TTTA AGCTC TTT  
AGCAAAAATTT TTTA GAT TTTT CTCAGC ATTC TGCTGGACATGAGG GAAT CTCTTCGTACTGTTTTTT TTT  
TAAA CCTAGCATAAGCAGG CAAA TTAG TAAA TGATTAGAGCCGCGATCAGGTGA CAAA CTGTTAGGCAAG

GCCTTCCTATCGAGGCTGGTGGACATCCCTCTTCGAGTTTCCTAATCAACTAGGTCGTCTAGCTGGTA  
AGAAAATAAGAAGGCGCAAGCTCGTTCCTTCGGTCTATTATGTGTTGAACGTACGCTTCAAAAACACGC  
TTTAGTTTCGGTAAACTTAATCTAGCCGTAGATCCAAGTGGGACATTGTCACAGGATATTTTTCAAAG  
TTATTTTCGCAATACTCTATAGAGAATACTTGTATTCACGAAAAAATCGGTCTAGTGTACAGTTTTCT  
CTGAAGAATAAGAGGTTCCGAAGGGACGTCTTTACAAAAAAGAATAATTCACAGGAAGTTTCGTATA  
GATAAGGATGGTTTTTATGTTGTTCGGATACAAAGTAGGATTTCTAGCTGCCGATCCTGAAGAAA  
GATGACATCCGGAGGTAACGGGTGTTTTCGCAAGGTGTAATCTCGTGTAGGATCATAAGATGAA  
ACAGTGTGGTGCAGATGCAATATCTGGAACAACCGTTATGATAAGATGCTTCCCTAACAAAAAGAAAGTT  
CTTCAGTCATTGTTGCTGGAGAGCTTTCTTTAGAAAGCTATGTAGGTAGAGACGGTCTCCACAAGCTTC  
TATTTTCGTAAGCGTAGATACATTAATAATTCGGATCTTCTCGTCTGATGCTAGAGGTTCCAGAT  
GAAGGTCGTAGAGAGCTAATGATAATGTCTCTATTGGAATAATGGAATAAGTTTAGATACAGACTCTG  
CGCTTGATAAGGAAGTCTATGCAAGGCAAGAGAACCAACAGTATGCTAGTGAAGATGTTCTTTT  
GTTACAACCTACAAGCTGTTCTTTCCTGGCCTCTTTAGAAGAGAATTTCTTTTCAGTAACAGGGGCCTA  
TTCTATTCACAAAATTCATCCCATATCTTAAGAAGCTCTTGAATCTTCTTGTCTATAAGGTAAACAGAGC  
TTACAACTAAAAGACTACTCTTTCCTATAGTCCTTTTTTTCATCTCGAATAATGTAGAGATGAAAC  
CGTGTGTCAAACTTGTCTGGCCTTTTCTACTGCAGAGAATGGGTGAGCCGCGCAGCTTGAGACGAAA  
TGGGCAAAACGCGTCTACTGGTGTTAATTATTGACTCAATCGATTCACAAAGAGGTTATTGTGGTAT  
TACTCTATTCCTCAAGCGAGTTGGATCAACGATCGAAAGCGGATGCTCTTGTCTTCCCTCAAAGATGAA  
GAATTCATAAGCTCAAGAAGCTGCAGTTGTTGATGAGGACTACAAGCTTGTCTATCAAAACGCATTATCC  
AATTTTTCAGGGAAAGAAAGGCAAGCTTTTCTTCAAAGAAATGATCACACAAAAGAACAATAATTG  
TTCTTCTTGGTCTAGGGAAGAGCGAAGAAGTATCCGGAACAACCGTTTGAAGCCTACGCTCAGGCTAC  
TACTGTTTTAAGAAAAGCTAAGTGTAAAGCTGTAATTTTATTTCCCAACAATTTTCACAGTTGCGCTTC  
TCCGTAGAAGAGTTTAAACGAACCTGGCAGCAGGGTGTCTATCTGAACTATAATTACCAACCTATC  
ACAAAGTGGATACGTCCAAACCTTTCCTAGAGAAAAGTACTGTAATGGGTATTGTCTCTAAGGTAGGGGA  
CAAGATCTTTAGAAAAGAAGAGCCCTACAAAAGGGGTATATTTTAACTAGAGATTTAGTGAATACCAAT  
GCAGATGAAGTCACTCAGAAAAGTGTCTGCGGTAGCAAAAGGTCTAGCAGGGGAGTTTCGCGAGTCTGG  
ATGTAAAATTCCTAGATAGGAAGCGATATTAATAAGAAAATGAGGATGTTGGCTGCTGTTGCCAAGGG  
CGCTGCTGTTGAGCCTCGTTTATTTGTTCTGGATACCAAGGTAAACCTAAATCTAAAGATAGAACCCTA  
CTCATTGGTAAAGGGTAACATTCGATTCGAGGACTAGACAAAAAACCCTGGGAAGGCAATGATTACCA  
TGAAGGAAGACATGGCTGGAGCGGCTACCGTTCTAGGAATTTTTCCTGCTTTAGCTTCCCTGGAGCTTC  
GATCAATGTGACCGGATCATTCCAGCTACAGAGAATGCGATTGGATCGGCTGCCATAAGATGGGAGAT  
GTATATGTTGGAATGACCGGCCTTTCGTAAGAAATGGCAGCACTGATGCGGAAGGGCGCAAAATTTT  
CAGATGCCATCTCCTATGCAAAAAATTTGTAATCCATCCCGCATCATTGACCAAACTACCTAACGGG  
TGCTATGGTTGTTCTTTAGGAGAATCTGTGGCTGGATTTCAAACAATAACGACGTGTTGGCAAGAGAT  
CTTGCAAGCTTCATCAGAGACCGGGGAAGCTCTATGGAGAATGCCCAAGTAGAATAATGACCAGG  
CACTTCATTCAGATATTGCAGATATGAAAATATCGGCAGCAATCGTGCAGGATCGATTACTGCAGCGCT  
ATTTTACAACGTTTCCTCGAAGACAATCCAGTAGCATGGGCACAACAAGACATTGCCGGTACTGCTTAC  
CATGAAAAGAAAGAGTGCCTTACCCCAAATATGCAACAGGACAAAGTGTGCGTTGTTAATTCATTATA  
TGGAGAAATTCCTATCTAAATAGTTATTGTTAGCGATATTAATAATATGTGTGGTTAGTTTAAATAA  
AAAGTTAAAACCTAACCATTTTAAATTAAGTTTTCATTCCTCTTGTGATAGATCAATAAGTAGTAG  
TTACCTGTCTAATTAGGGGAATGAACATGTTGGGAGTACAAAAAGAAAGCAGCACAAAGAAACTGCTGC  
CAGAAAAGCTGTAGTACGTAAGCCTGCCGCTAAGAAGACGGCAGCTAAAAGCTCCAGTAAAGAAAGTT  
GCAGCTAAGAAGACTGTAGCCCGCAAAACAGTAGCTAAAAGCTGTAGCAGCTCGTAAGCCTGTAGCTA  
AGAAAACAACAGCTAAAAGGCTCCAGTAAAGAAAGCTGTAGCTAAGAAGACTGTAGCCCGCAAAACAGT  
AGCTAAAAGAACTGTAGCAGCTCGTAAGCCTGTAGCTAAAGAAACAACAGCTAAAAGGCTCCAGTAAAG  
AAAGTTGCAGCTAAGAAGACTGTAGCTCGCAAAACAGTAGCTAAAAGCTGTAGCAGCTCGTAAGCCTG  
TAGCTAAAGAAACAACAGCTAAAAGGCTCCAGTAAAGAAAGCTGTAGCTAAGAAGACTGTAGCAAAAG  
AGTAGCTTCAACAAAAAATCTTCCGTAGCAGTAAAGCTGGAGCAATATGAAAAGCAATAAACTACT  
GCAGCTTGTGGACGTGTAGCTGCTTCGGTGTAAGGCAATGCTTCTGCAGCTAAAAGAAATGAATC  
CTAACCGTCTCGTACAGCTCACAGCTGGCGTCAACAATTAATGAAATTAGTGCCTAGATAGTGCATCG  
CTTTCGATGATTTCTAAGTAGCCGGGAATAAGAAATTCCTTTTCCTGGTTTCAAATAATTTTGGCTGA  
GTGAAAAGCTTAAAGAAGATAAAAATCTGGGAACAAAAAGAAATATCCAGAAATATTGGGTCAAGCGA  
TGGATATGGGAAACAGCCAGAATAGTATTCACATAACGTCTACTAAAGATCAAAATTCAGTATATTGAAC

GTGAACGATTTAGAGTGATTGTGATTGGCTCTTCATCTCTTGAGGACAAAGATATCTTTTCGGAACTTTA  
TATTTCTGGAAGGAAGAGCTTTCAAAACGGACAGCGCAAAATTGCAACAAGAGCTCTTATCTTGACGGAT  
CATCAAAACAAATTCGCTTCCCAAGAGACTATAGGCATTTATCAAGCAGAGAAAATGAGCTCTTCTCTAC  
AAGAGTTTATTATAGATTACTCGGCATCCAAACCGAATCTTACGTTGTTCTTTTCACAAAATAAGC  
AGAGTTGTTCTCTTCCTTATCTTCGAAGCTTTCTAATGCTCAAATTTATCTTTACAAAGAGAGTATCAA  
ACTGAGCGAGATGCTCGCATAGCTCAGGTCAAAAATAAACGTTCTAAAAGAGTTGCAGCTTTCTTGCTCTT  
TAGGAGTTGCAAAGATTCAAAAGAGTAAGTTCTCAGACAGGTTTACAAAAATCTTAGTGAATTTCA  
AAAGTTGACAAATCAGATGGGAGACAAGGAATCTATAGAAGCTTCGGATATTCATCAAAAATAGAGAAA  
AAAGAGGCGATCTCTCTGTGGAAGTTGCGAGATGCTCTTCTTCGTAAGACCGTGTGCTGCACACAGTC  
TGATGAGATCAAAAGTGTCTGATATGGGAGAGGAGCCTCTGGCGATCTCAACTTTTACGTAGTCAGTA  
CCTCTTAGGACTGAGGGCAGTGGCAGAGCAGTCAAAAGAGCGTAACACAAATATTTATTGCTGCAGGA  
GAGCCGGCTCTTTTAAATGGCAAAACCTGTTTTCATACGGAAAGTTTAATTAAGAAATAACTTCCAAG  
ATCCCATGCTTTTCATTAGAAATGCTAGTTTCACGACTTTAGATTTTTACAAAATGGATTTTTCCTGT  
ATATTTTTCGTAAGCATCTTTTGAATAGTCTCCAGTCTAATGATTTAGAATACACTTGTGGCTATGGC  
GCTGTATCTTCTTCCCAATACTTTAGGTAGTAAAAGATCTGAGGACCTTCTTCTTCGGTTGGAGAGATT  
GTTTCGGAATAAAATCCAGGGATTAATAGTAGAAAGTATCGTGGTGGGCGGTTATCTTAAGTTTATGGA  
AAGTAGAAGAGCCTCATAGGTTCTCTTGGCGTATGAGCAAATGACACTCTGTTAAGGCTTGTGA  
CTTTTATTTAGAGCCTATTCCTCAAGAAGCAAGAGTCTTGGGGCGTCACTTGTGATGCAGGGTGCCTTGT  
ATTGCTGATCTGGGGCTAAGTTAGTCCGAAGAGCTCGGACATTGGGATCCCGTGCATGCTGTATCTG  
GCCCTGCTCGATTACGCAAGCGTTGATGCTCTCTGACTACCAGGGCAAAATTTACATTTTATGTTA  
CAAAACCCAAAATCCATAAGAAAGATCTCGTTACAAACGAAGTTGCTCCGGAAATCCCATACGCAATC  
TGTATAGAGACTCCGTACCGTAATCCATATACGCAAAATGCGTTATTAGATCAGCTTCCGGATCATGGCG  
AGCCAAATGTTGCGATTGATTTAATGGGAGATCAAGAAATACGTTCTACGCGAAGCATAGCCGTATGAA  
TCAATCTTCTGATATCGAAGAGGTTCTGTGAGCGCAAAAAAAAGTTCCAGCTATTTTCTATTTATTA  
TCTTCAAAATTTACAGTATCCGCTAGCAAAATAACAAATTAATTTAATTTTCTAATTAAGAAAA  
TTAGAAATTAATTAATTAAGACAAAACATGAACAAAAAATAATTAAGAACGCGTTCTTCTGTCTGT  
TCCGTCGACACCTTCTGATCAGCCTGCCGATCCACGAATCCGTTTAAATGCTCAAAAATGCAAG  
CTATCTCAGAATCAAGGGACGCTTCTGCCGATGTTGATGCGATGGTACCACAGCTCATGTCAAGCTAG  
ACGCTAAGAATCAACAAGTTCTGTAAGGTAGCTAAAAGGGAAGAAGACCAAAATGTGATTGTACTCTCTCA  
GCTTGAAGGATACTTACAAGAAAGGATCTCGATCGATCGCGGGATGTTTCTACCGACTTCTGGAGGGCG  
ATGGTTGGAGACATTAATATGGGGACAAGCCAGGGAATACCATCAAAGGGCTTCTTCTTCTTGGGGAT  
CCGCTATGTTCTCGGGAATGAATATGCAGCTTCTGTAGGGATGTTACAAGATGTTGTCGGAGAGTATAG  
AGCTCGGTTGGATGACAAATTTGATAGAATCACTAAGTATGCTGGTTTCCAGGAGAAGGTAGTCTGGAGCAG  
CTCATCAAAGATCTCGGTAGCCCTCAGGAATCTCAGGCTGGACAGACGCCTTCTGTGACTCTAGAGAAGC  
CTACAGATGCTAAGTGGTTATTGTTAAGCGCTAAGAACGCTATGACAGGGACCTTGCCTCAAAAGAAAA  
ACAAGGAGCCAAACCAACAATCCAGATCCATACGATAACAAATCTGAAAGCGGGGGGATTAGGAATATT  
GGAACAGCTACTCCGAAAGATAAGTTACAGAATATAGTTCTGTTGCCGACCTCACAACTACTGAAAG  
ATTTACAAAATAATGCTCCTTCGGAAGGAACAGGTTACATACAGGTTACAGACGTGGATCTAGATCTGG  
TTCGGGAACGGACTCAGTATCAGGGGTGTAGCAGGTGCAAGTGAAGCACAACTGCATCGACCTTC  
CCAGAGTGGACGGGACAAGAGGTGCCCTTCAAAAGTGGAGCAATCCCGGATTCGTTTCAGGTTCACTAA  
GTGTACAGAATCTCTTAAGTCTAGTAATGCAGACAATTATATCAAAAAGGATAACGGGACTTATTCGCT  
CAAAAGAAAGAGGTCCTTATCTTATCACCAAAACGTACGAGCAAAAGTTCTCCAATACAAAATGGAGCTGTT  
ACCTGTACAGGGACTCTCAGAAAGAAATCTGATTCACATCTGCTGGAGGAGATGTGGCAGCTCAGCCTA  
CGAGTGGGATGCTACAGCCCAACTGATCCAGAGCCTTACCAGCATTTTCCTGGTAGGCTCTTCGGA  
TGGGAAACTGTAGTTGGGAGTGCATACATTTTATGTTCCAGGGGACAAAGCGCTTTCAAAACATACGCTA  
ACCAAAAGCATTAACTCTGGTAAAATAACAGAGGTGAGTCTTACTTACAGCTACAGCTTCTAAGAGTTATG  
TAGCTATCTCATATATGGGCGCTGGTTATTAATAAAAAGTTAAGGGAGAGAATCTCCCTTAACATTTT  
ATACTGAATCGATGTGATCTTAAAGGCTGTGATGGTGTGCAAGGCGTGGATCAAACTTAGTAATTTCTC  
CTGAAGTTAATACCAAAGACCAGGAAAAGATGTCAAAGTAATACCTGTAGATGTTGTTCTGGTGGGT  
GCCTTCATCGGCTTGAGCCCTTAAATGGATTTCAAAATGTCGATCCGTAATCTGTAGTTGTGGTTGATGCA  
TACCGAATCTGTATTCGCTTGTCTGGCTGGCTGGAGCATTATTGGTACCAGGATGATGACGTAGGATTTT  
CTTCTTGTGAGTCTCTCCAGATCCAGAACTTCTCCCGAGCTGTTATTAAGAAATTAACGTAATTCAG  
TTTTAATACAGATCCAGTTGCTTGCACGGGTACAAATAGTGTGCAAGATTGTCTGAAGCGAGCGAAT

TTTTTGTAAATAGGATCAGGTGTTGTAGGGGTAGTAGGAGTGGGTGATGGAGTTGCGGATAGGTTATACT  
TCCTTGAAGAAAGTTTTCGTTATAGATGCAGTTGTCGGACCGTTAGTTGCAGGAGATGACGTTGCTTCTGA  
AGTTGTTTCCAAAAGAGAGGATGATGGAGATTTAGGAGTTGTGTCTGTTCAAAAGAGGGTTACGGTTAGC  
TCTAGAGAAATAGGATCTGTAGATGTTGGAGTTGTGTTGCAAAAGATGGTTCCAGGTTCCCTTGCATGGAAA  
AGGTAAAGAAATACCCTTTCAAAAATTACCAATTTCTGATCGTGAAAGAGTCTGAAAAGGAAAAGAAATTCCTC  
CCAATAAGGAGATTTTTCGAGAAATGTAGTGCAAAAGGAGATCAGTCCCTCGGCAGCCGGGTATTTTCG  
GTATCAGTTGAACCAGTAGTAGTGGCAGCTAGCTCTCTAAATAATGAGGAGGCTCCGCAAAAAGAGGATG  
GTGGATGTTCCGGTGTGTTGCTGTTGTCTGGAGTAGTTGGTGCAGGACAAAGGGTAGGAGCTTGTAGCCA  
GTATAATATTCAGAAAAGCGTGATATTGAAAAGGCAAAATATCGTTGTTTTTTAGAAAAGCCACAAAATGGA  
GAGGTGATCAAAAGCTTGTACAAAATCTTACATTGATAGCACTCAAAATATCTTTACAAAATGGGAGTTCCTA  
GATCAGATACGGTATTACTGTTTCAATCAATATTTTCGATAACAGTCCCTCCACTTGTTTTCAGAAGATC  
TGGGTAGTGACAGTGTCAAGGATCTTACAGCAATACCGAGAAGTTGGTGTAAACGTGGATACAAAATGAGTTA  
ATATCCGATAGGCTGCGACAGCCCGTGAATCAAAATCATTACTCAAAATTTTCATCTGCTTTTCATTTCA  
AATAACCGATAGTGACAGCAGAGCCATCATCAGGATCTTGTGACCCTCAAACTTGTACATCACAATGTC  
GGTGACATTGTTTCCTTGCATGTCAATGTCCCAGTCATTGTGCCCCCTCAAAATGGGTAAAGAAAACAGGA  
TTAGGGTCATTTTCCAAAAGTGTAGTTTTCCTTTTAGATACAAAAATGTGACTGCATCTGTGGGATCTTTAG  
GATTCCTGATTGTGTGATGGGTGTTTATGTTTAAACAATGCCAGGAGTAGACTCAATGCCTGTCTCACT  
AACCCTTATAAAGACTCAAAATCACTACTTTTATTAGGGTTCCAAAAGGAAGAAAGAAATATTATTTTTTATA  
TCGTTTATTATTTTCGTTTAAAAATCTTTTAACTTCGTAATCTCTATACTATCTTATTTTTAAATCATTCA  
AAAATAGGTGATGGAGACGAAGGTGTTCAAAATGTTGGAGGAGTTGTTTATTTGGTTACGGTAACATCC  
GTTGGATATAGAGCTGCTTCCCAAGACCAAGATGATAGTGTAAATAATGATGAGGTATCACCTCCTCCAT  
TAGAAGCAAAAGGAGGTAGTTGTAGCCATTTTTACACTAGATGTAGTCTGTAATAGGAAGTTGTAGTTGTAC  
AGATTCCCCAGAGTATAGTGTACAGAGGGATAGTGAGCGTTTCGGTTGCTGAAGATGATACTGAACCCTT  
CCTCCATTAGAAGCAAAAGGAGGAGTATCCATTTTTATGTCGGATCGGGTCTTAATAGGAAGTTGTAGTT  
GTACAGATTCCTAGAGTATAGTGTACAGAGGGATAGTAAGTGTAGTTGCTGAAGCGTCTCCAGAAAGATC  
TGATCCGCTACTAGGGGTATTGGTCCACTAGAATGTCCTGGAGTGACTGTTAGTTTACGGATATGGTC  
TTGGGTGCAAAATGTACTTCCATCAGCTATTGTGGCAGTTGTAGGACTCCACGTCCCTCTTACAGATAAAA  
CCAGTAGGCTGCGGTTTTTACTTTTAGATTTTCCTGTTCTGCTGTAAAGCACAAAATCGGCTAGTTCACT  
CTTAAAATCAGGTTCTGTAGGAGAGGAAGATCCGCAAAATGTTGCTGAGCCATGGGATGTATCCATTGAAT  
GAGATTGTTGGAGAATTTGTGCTAGTTGGAAGAGTATTGGAAAAGAAAGCTCTCTTAGGTTGCAAAAGCA  
AAGACTCCAGGTAGTTACATTGGCTGCATAATTACTGTCCAGTATCCGGAGTCAAAATATTGGCGAT  
CTGTGCGTTGGTCATCTTGAATCCCTGTAAGCTTATTCTGAGATTGTGTACCACAAAATGAGCATTC  
TTAATTACTGAAGGAGATCGTCATAAGATAAAAAGGAGAGATTCCTTTTCCTTCTGTATCTGTGGTAGGAG  
TAGGTTTAGGTTTTCGTTGATAGGATCGGTATCAGCGTCCGGGTTGATCGTAAATTTCAATTCGAGAGC  
TTCAAAAGCCAATGCGATTTTTTTTTCCTACTTCACTAGCAGAAATTTAGAGCTGTGCTTAGCAAAATCATT  
TTCAAAATCTTATCAACAATACCCAAAACATAATTCACAGTAGCTGCTTCTGAGTAAAAGCTTCCCATG  
CTGCATTGTAATCATCGATTTTTCCTGTTATTCGCCAGCAAAATGTTGACTCCAAAATCGCTTGTTC  
TTGTTTCCTGGCTGTTTTTCAAATAAAACCTCTTCTTCTCGAGGATCTCAAAATTTAGAGGATTCCTCT  
GGAAAGAGTTGCGGATGGCAAAAGTGGGTGCTTCAAATTAATAACGGAATGTGTTCCCATATTAATGTTCC  
CAGTCATGCTTCCCTCATGAATGGGAAGATAATCTGGACAAAGGTCATTTTTAGATAGATAGCGTGCTTG  
AAGGTATTGTAGTGGCACAACATCCGTATCACGAGTCGGAGTAGCTACTCCGCTTAAGTTAGCTTCGTTA  
TTAAAATCTCAGCTTAGTGAATGAAGAGAGCTGTTGTGAACCAATCTCAGTAAAGCTTAGTGGGTGAT  
TTCGTTGGATTTTCGTAGATGCGTTTTTTTATAATTCGTTCTTTTATTTCATTTTTCATTAATAAAA  
TTAATCGATTTTATAATGGTTTATAATATCGATTAATTTTATAATTTTAAAATGAAAAGAAAGGCCATG  
ATTCCTTCTGCTATAGAATCATGAAAAGACGCCCTTTTATTATTAATGAAAAGCAAAATCATCCCTTAG  
TAAAATAGAGAACCTATAGACGGGTGCATTAATAATTCGTCTACGAGTTCCTGAGGAAAATCTCAAAGG  
GATGGGTGCGCAGAGACGGAGGCGCAAAGCTAGAGTCTCTTAAATGCGTTCGCAAAAGAGGAGCTCTCC  
ATAGACTCTAAAATGTCGGTAGATGTTGATGCGCAGCTCGTAAGTAATGCGAGATCCATAAAAAGGTTCAAAG  
ATCGAATGCCATGGAGATATTGTGAGGCAAAAATCTCTAATCCATAAGAAAGGCTTAGCTGTCCAGTAGTA  
GGTATTGTGTTTGAAGCCGCTTGGTTTCAAAATAGGAAGCAAGTTCATAGCGAGTAAATCCCTTGATTC  
TCTAGCAGCTCTTCCGCTGCTAGTGCATCTCAGCTAGGAGTCTCATCTGCTATGGATGGAAAGATAC  
GTTTACGGTGCAAAATAAAAGGAGGTGTGAGGGTCTATAGTTAGATTAATAATAGAGATGTGTTGGATG  
GAGAGAAAATAGCTTGGCGAAGATCAACAAATAATCACTAATCGACTGTGTAGGGAGGCCATAAATAAGG

TCTGCAGACACATTA GAAAATCC GTATTGGGAGCAGAGCA TAAA GGCTTCAATCGC TTTAGATGAA GAGT  
GTGTGCGTCCTAGTAGCTTAAGTAGG GGATCATT GAATG CAAA TACGCCAATGCTAATGCGATTGATCGA  
GGTCAAGGCGAGAGCCT GGATATACTC CAGAGAAA GATTTTCAGGG CAAACTTCAA GAGTGA TTTCTGTG  
GCATGCTGAGCTTCTAGAGCTACGAGAATATCTT GAATCAAAGCAGGGGGAAC TAAA GAAG GAGTCCCTC  
CTCCAAA GAATACTGTATCAATATAGTGAGAACAACGTAGAGGGGCTAGTTTTT TTTAGCCCCTC TTTAAT  
GACAGCTTACAATAAGAGCGCATTAACTCTTC TTTATACGGGATCGTATAGAAA CTACAATAATGACAT  
TTCTTCGAGCAGAAA GGATATGTATG TAAA GAGCTAAGGGAGTCTTACC ATTCATTC GCGTCAGGATCT  
ATGATGCCTCCTCGGCGCCAACGATTGCGATCGCT GAAA GGATCC TCATCGTCTTACTAGAGTAGTCA  
GTTCG TTTCCGC TTTCTTCTTGCCTCATCACCTAGGTCAATCTCAATTGTGTCACCGGCATCGAGATC  
CACTTCTGTATCC GAGGATTC TACAACTCAACGTCT GAAA CGTGGGGCCATCT GGG TAAA TGGT TTTA  
GCTG GAGT TCTTCGAGGGGTACGTACTC CAAA ATCTCACC GC TTTCCAAA AGAAGTTGTAGACGTTCTT  
TC TCTTCAA GGATCAA C TTTCTAGCAGACGGATTTCTTCTGGTGTCTCTCGA TTTCTTT TTTAGGAAC  
AAGGCCAAGTTGCATCC ACTGGGT AAGATCATGAAGCTCTGATTC TAATTTTT TTTAAA CGCTCACT TTTT  
ATTCG TAAA TAGTCTGTCTATGATT GAAA CCG GAAA CCC CCTGAGAGCCAA TTTA CTTGCTTCCTACC  
AAGGGTAACTGCATCT CAAA CTAGATAGAGCAAAAAGTGAGCAGGCA TAAA CAAATAGATCAGGAGAGA  
T CAAA GCTAG TAAA ATACTCATTC CAAAGTACAAA TTCAACTGATAAGCCAAGCTCTGCTAGCTCTTGTA  
AGAAGTCAGGAGGCTAGGGTATTC GATACT TAAA AAAAAAGCAAAG CAAACTTTT CAAAAAA TAAAAA  
T CAAA ATATGGGAAT TTTCTAAA AGTATCACCTTCAATCGATAGATTCGTTTAT GGATTCAGAC CAAAC  
TAGGCATGTGCATTCATCAGATATTGACT GGAT GAATC CAAA TCGAGCGA CAAA AGAAGCATGAGCCG  
ATGGATTC TTCATG GAAA ATTTTCCAAA AAGGTTATCAAGTTGGAAGACGGAGGGGAGCCCAACA GAAT  
CTTCTCATGATCAATTC TTTACGTC CAAA CAAG GAAA AAAGCACACAGTCT CAAA ATGATATACCGTTA  
TTACGGCTATTTACAGGGCAAGTGCTCCAAT ATCC TCATCAGAA GAAT CTTCTCTAGTTACA GAAAAG  
GTTTCGTAATTTGATCC TCAAGAAGAGATTC CTTCTTTAGGAT TATTACCGCAATCTTATGTTTCGTATAG  
CAGAC TTTATT CAGTAT TAAA AGAGAAGTATTGTGCGAGCATCTCTGTTGAGACATT GAAT TGCTCTCC  
TGAG ATCCAAGAAT ATGTCTGGAAA CTCATGGAAGGAGAGAAGCCCTC TTTAAC TAAA GAAGTTCTTCTG  
GCGCGATATCGAGACG TAAA AAGAGCAGTAGCT CAAA AAGAAT TTTACAGGT TAAA TTCACAG GAAAAA  
AGCGCT TTTCTCTAGAAGGTGGAGAGAGCTTGGTTCCCATGTTGGAGCATCTCATTTGCTTGTG GGGT TAA  
GCAAGGCATCAATCGTTACGTGATGG GAATGCCCTCATCGAGGCCGAT TAAA CGTCTTGTCAACATT CAA  
AGAAA GCCTTACCGGCAGATTTTC ATG GAG CAAA AAGACGCTCCCCAAATAAGAGGGCTG GAAA CTGTTG  
GTGATG TAAAGTACCACAAGGGAT ATGTTGCCAATAGGCCGGAACAGAACGTTATGATGGC TTTA TTGCC  
GAATCC GAGCCA TTTAGAGTCCGT GGATCC TGTGTGGAAGGTGCTGTAGCAGCG ATTC AACATCAGGGA  
GAGGCTGGGAAGGAGCAAGCCTGCTTAGCTGTGTTGATGCATGGAGATGCAGCCTTGGC GGGT CAGGGCG  
TTGTATAT GAAA C TTTCCAGTT GAGTGGGATACCAGGTT ATTC AACAGAAGGAACGTGTGCATATTGTAGT  
GAAT AATCAGATAGG TTTCACTGCGCAGCCTCGA GAGTCTCGTTCT ACTC TTATTGTACAGATATAGCT  
AAA ATGATGGGGATCC CTGTATTC CGAGTGAAT GGAGAGGATGT TTTAGCCGTCTCCAGGTCATG GAGT  
ATGCTATACATATCC GTGAGCGT TTTCAATTGTGATGTGATTATCGACCTCTGTGTTATC GAAA ATACGG  
TCACAAT GAAA GTGACG ATCC TTCTGTTACAGCTCCATT TTTA TACGAAGAGATCAAAAAGAAA AAACAA  
GGGT CAGAAT TATTC AAAGAGATCC TTTACACC ATCC TGAATGGAACA TTTCTTCCAACGAGT TGGAGA  
GAATAGACACAGAGATAGCGCATGT TTTAAA CCAG GAGTACGCTTCTCT GAAA GATCC AGGTGTCAACG  
GCTAGAT GAATGTATGCATTGC ACTC GTATGGCAGCTGGAGAGCTTCTTGTGCGATAATGTGGATACATCG  
TTAGACAAAGAAGCCTTG CAAA ATCT GAGTGCCAAAC CAAA TGATATTCCTGAGCATT TTTCTCCTCATG  
CAAAGATTC GATC TTTAT TAAA TAAGCGTATGAGCATGGCTGATGGAGAGATCGGTTATGATTGGGGAAT  
GGCTGAAGAGGTGGCGTTCGCTTCTTATTACAAGAAGGTT TTTCAATTACG CAAA TCAGGACAAGATTCCT  
ATTC GTGGAAC TTTCAAGTCAACGACAGTTAGTCTGGAC GGATGTCCAGACAGG GGATACATTC TCTCCAT  
TATATCACTTGTCTCC GAGTCAAGGCAGCGTG GAAT TATACAATTC CCCTCTATCT GAATACGCTGT TTT  
AGGC CAAA AATATGGTTATGCACAACAAGCAGAAA AGACTC TTGTTA CAAA GGAAGCGCAG CAAA GAGAC  
T TTTCAATGGAGCCCAATCATT CAAA ACCAATATA TTTCTTCCG GAATTCAGAAA TGGGATTTA CATT  
CCGATGTAGTTGTACTGCTTCTCATGGCTATGAGGGGCAAGGACCTGAGCATTC CTCCGGCTCGTATAGA  
GCGTTA TTTACAGCTCGCTTCCGATTG GAAT TTTCAAGTTGTTCTTCTTCTACTC CCGTACAGTAT TTT  
CGTATTC TGCGGGAGCATAACGAAGAGAGACCTCTCTTCTTCTTATCATT TTTCTCCTAAGATGTTAT  
TGCGGCATCCG CAGTGCCT GAGT TCTATCGCAGAG CAAAGAAT GAAGGGAGGCTTCAAGCC TTTCTTGG  
AGACGA GAATCC TAACTATCATGCAAAGTTCTTGTTC CAAA TAGTGGCAAGAT TTTA TTACGACTATCGT  
GCTTCTCTTCC TAAA GATCTT GAATGTCGT CAAA CTGTGATAC GAGTAGAGAG CAAA ATCCATTATACT



TAGAAGATCTATTGGTTCTGATAAGCAAATATACGGAAGTTCACCATTATGTATGGTTGCAAGAAGAACC  
TCAAAATATGGGCGCTTTTAGTTATCAAAATTAGCAACTGACGAGATTTTCCTAGCAAATTGCAGTGC  
GCAAA CCGTCCTAGGAGTAGTTCAACGGCAACA GGATCTGC GAGTTTAAGTCAAAA GAATTATCGATGT  
TAATG GAAACCC TGT TTTCTATAGGTAGAGAGTAGAGCATGAGTATAGAGGTTCTGATTCCCAATATCGC  
AGAATCTATTAGTGAAGTGACGATTTCTGCACTCAAAATTCATCAGGAGA CAAA GTGCAGGAGAATCAA  
GGGATTCGGAGATAGAGAGTGAAGGTGAATCAGCTCATTTA CGCTCCTTGCTCAGGAAGGGTAGAGT  
GGAGCGTTTC CGTAGGGGATACGGTCGCTGTTGGTAGTGTGTAGGGATTATTAGTGAAGCGGAAAAGAG  
TCAAGATACCGCACCTATCCATGAGCAGATGCCATTTAGTCTTGTAGAGCAGGAAAGCGATGCGCAGATT  
ATTGCCCTCCCTTCATCAGTGAGACA GGATCC TCCTGCAGAAGG GAAA ACT CAAA TTCCAT TAAA GGAGA  
TCC AAC CAGCTTCTCTGATCATAGAAATCTCGA GAATCTAT GAGT GCTATTC GGAAGACGA TTTCTCG  
TAGATTGGTGAATCTCTACATGATTCAGCAATGTTAACGACA TTTAAT GAAA TCC ATATGGGGCCGCTT  
ATTGCTCTGCGTAAG GAAA GACAAGAAGA TTTCTGTTGCGAAGTATGGG TAAA ACTG GGGTTCATGCTTT  
TCCAAA TTAGAGCCGTTGTAGATTCCAAAAA AAATATCCTC GGGTGAATGCTTATATTGAAGATAACGA  
AATCG TTTACAGACATTACTACGATA TTTCCATTGCCATAGGGACAGATCGTGGATTAGTAGTTCCTGTA  
ATTC GTAATTGTGATCAGTTATCTAGCGGGGAGATTGAGTTACAGCTTGCCGATTTAGCTTCTCGTGCTC  
GGGAAGGCAAACCTTGCTATTCATGAGTTAGAAGGGGGAGGCTTCACTATTACCAATGGAGGGGTATATGG  
TTCTCTTCTATCCACTCCATTATCAATCCTCCACAGGTAGGTATTC TTGGGATGCACAAGATAGA GAAA  
CGCCCTGTGGTTAGAGAAGATGCAATTTGTGATAGCCGATATGATGTATGTAGCTATGAGCTATGATCATC  
GGATTATAGACGGAAA GGAAGCCGTAGGATTCCTTGTGAATGT TAAA GAGCAATTAGAACAACCCGAGCT  
CAAA TAAA AATGTAGAAGCGTCAGAGAGAGGCTGCATTACTC GTTATCTAGGAAGAAGAAGAACTGCAG  
TGACATTATTT TTTGAGAAC GAATCGCTGAC GGATCC TGCTGGTGGCAGAGATTTC CAGCTTCTGAACGA  
GAAA AAGGTATTAGATTCCAGAACAAGTGCAGCGTCTGAGAT GAAA ATATGATTACTGGATAGTCCCTCG  
GAGAGCAGTTGT TTTCTTGTACTGCTCG GAAA TCGAGGTGAT TTTCTTTA GGCAT TAAAGGGAAA AAAC  
TAGAAGGGAACAGTCTCTTATAATCTGGATAGACAGCCATATCAGGACCTAGAGAGGGAGATATAGCCAC  
GATAAGATCTTGAGGACGAGTGTGAATGTCTTT TTTAGCAGGCGAACAGTGACAGCATAGATATTGCCCT  
ACAAGACCTCTCCATCCTGCGTGTACATTAGCAATCACATGGT TTTCTGGGT CATA GAAAATGGCTGCTT  
GGCAATCTGCATGG TAAA TGTGTAGGGAGAGAAGAG GAGT CGTTGT GAATAACCC ATCGGCAGGCGCTCT  
CTTGG GAGT TTTA GGGGTGACATAACGTACGCTCGTTCCATGCACCTGACGAGCGTTACAAAAATCGTTG  
CCTCCTAAGGAAGAG GAAATGACCTCATCAGAAA CTGACTC GCTTCTTCTTATCATCTTGT CAAAGGA  
AAATACCATGGC GAATAGGAAGGTATTC TAACTCAG GAAATGTCTGT TTTACGTAAA GCTTCGGAAGGGAG  
TGT CATCAGGGATCC TATTC TGGCTC TTTCCATACGCCATGTTCT TTTAACAATTGGACCAATTC TTCTT  
CAGCAT TTTCTATGG GAATGCATGAT TTTACACA TTTA TG CAAA ACGTATAGGTCAATCATACCTGGT CA  
AAATCC TACGTAGCCAAAATCGGCGTCAGCCATTTCTCCTGGGCCATTGACGATAC ATCC CATCACAGCA  
ATTT TTTAAA CCTCCTGGAAGATG TTTCTTTT AC GAAT CGGTTGA GAAA CTGCGAGAAGGTC GAAA  
GCGTTCGGCCAC ATCC AGGGCAAGAGACATATTC CACTGTTACGGACC GAATATTAGCACAAAATAAAAT  
CAAAAA ACCCAGAGT TCTAGAGAG TTTA ATATCTACAAAATCTAGTAGTACGCAAG ATCC TAACCCGTCT  
AGAAG TAAA GCTCCCAACCGAGCAGACAAGTCGATAAATGGCTTCATT TTTAGAAA GGTGAGGATC TAAAG  
AAA AGCT TAAA CACACAGGTTGTGTA GAATGTTGTGCGAGA GAAA AAAAGCGACGAGCAGTATGGATATC  
GGTACTTCAAAATAGACAAATGGAGCAGAAA GAGTCTCTCAGAGAGCC ATTC CTCCTCATTCATCGGA  
TTAA GGATAGGAGCATCTCTTTA T TAAAGACAAGAAGATGCTTCTCTATTTTCAGAAA CGATAGGAGAGG  
AGCGCATAGC CAAA GGGACAACGACTCCTTCCG GGGTGTGATGGATCTAT TTTCCCTGTGGTTGTGTCAAT  
GCCTAAGCACTGAAGAAGTCTATAGGCTCTGCCGTGAGTGTACATCGGTTAAGTTAATTAACAGT  
CCATAGACATTGTCCAAGGAG GGGTATTC AAAGTG TTTCCAGTACCCAGTTGT CAAA AAGAATGGATGG  
CAAA TGGATGTGCGCTTCTCCCATC TTTCCGGA GAGTCTGTGTGTCTG CAAA AAGAATCGATACAAAT  
AGGGATCTCATTGATGGGGCTACCGGTTAGAGAGCAGC GGATGGTATC ACCCAATCCCTCT GAAA GAAGC  
GTACCTATTCCTACTGCAGAT TTTA CAATGCCTGCAGTGCCAGATCC TGCTTCTGTAACTCCTAAGTGCA  
GAGGATAAGACC ATTC TCGTTGGTCTAGCTCATAAGC TAAA GATCGATACGCTGCCACCATAACT CAAAG  
ATTACTGGATTTTCATTGAGAAGATGACATCATGATAGTCCATAGCGACACAGACTTCGGCATATTC CAAT  
GCAGAGTACACCATGCCCTCAATCGTA TTTCCATAACGTTGCGTTACGCTTCTGATAAGGAGCCGTGGT  
TAACGCCTATGCGCATAGC CAAA CCTAAGCG CAAA CATT TTTCCACAAGTGGAGAGA ACTTGTTCATCAA  
ATGCTCTAAGCTATGCGCGTATTGCTCATCAGAG TAAA TTTCCAG TAAA CATATTACGCTTATCTACA  
TAG TTTCTGGATTGATACGCAC TTTA TCTACACAATCC CACAACATGTATGGCTGCCCTGAG GAAA GAAA T  
GGATATCTGCTACAAGAG GGATG GAAA TGTCTGTT GAATCAAGCGGTC TTTAATGTGCTCGCATGCATG

AACCTCTCGCAAACCTTGTACCGTAACACGAACGATGTCGCAACCCAACTCTTGCAGAGCACAAA CAAAT  
CTAACCGTTCCATCCACATCTGTGGTGGCTGTAGTCGTCATAGATTGGATCAAAATGAGTGTCTACTAC  
CAACAAAAGATCTCCGATTCCTACTGGGAGGGTCAAAACGTCGAAACGCATCAAAATACAGGGTGTTC  
CATGACGAGGTGTCTACAAACAATTCAAAAAATTGGCTGGGACAGTACCGGCCGAATCTCTTTCCTCTG  
AAGGTCAAAAGGGGGCTGAGGAAGTATAAGCTTTAATGATCAATTTAAAAGGAAGGTCTCCATGGAGAAA  
CCTCCTTAAA AATTGTTTATAAATTCACGGGTGAGGGATGTTTCGTAAAACAATCACTAGATCCAAAGATG  
CGTGTTTTTCGCGGTTTTCACGGCATGGAGTAAGGCTAGTTTAGCAGACTCGATCCATCAAGCCG  
CAAACTTAGCGCTCTTGGAAACAAAATCTCCGAAAGAACGATTAAGAACAAAGATCATAACGACAACCA  
CAACGAATAGCCTCTTCGAAACAAGCTGTGTAAGCTCGTAAGGTTATCTCATAGCAAGA TTTAGACATAG  
AAGCTTTAGGAGCTAGCAAAAAGATGAACAATAGAGGCTTGTATAGGTC CAAATTTCTCATCCAGCA  
AGGCAC TAGATGATTCAATCTTCCCAGGTGGCAGAAGAGCATTCTCCTGGAAGTAGGATCCCTGACTCG  
GGTTTCGATTCCTCCAGCACTTGTGCGTAAGCACAGCAGGGAATGCATCGTTCCTCCTAATCCCTCCTT  
GGCTCTCTTTCGGAAGGCTGCCGATTTGTGTGGCA CAAACAATCGCAGCAGGTAGATTCGATTGCATTCT  
CAAAGAA GAAAATTGGCCTGAAGTAGAGACAAAAATAGTATGAGTGAAAGGAATATTC CAGGCTC TAAAT  
CTTGCTGAAGGGTTTC TGAAGAACAGAGGCGT CAAATCATTAGCAAG GAAAACCGGCATCTGTCTTATCG  
ATTC TATGCAGTTCATCCAAAAAGCA TTTACCGATCGTTCTTCTCAGTGGT CAAAGAGGTAT GAAATC  
TGGAGGAGGAGGAGCTATAGGTTTAGGTTCTCAAAA TTTACAGGCAGCTCGGGAGTAGGTT CAGCAGGGAGT  
TCGGTAGAAGGTCTTCGGGACACAATTTCAAAAGGGACAAACATATCGACAGAGAAA TAGTCTGAAGCAA  
AAAGACTGACACC TAAAATAACAGCA GAAACGGCGATTAGGGCAGGAAGGGAGGCTAAAACGCCAACCAC  
GCAACCAGCAAGTCC TAAAATGATTC CAGACGCAAGAGAAGTAATGAGAGCGCGTCTAGGAGT CAAAACA  
GGAAGTTGACAAGAAGGACGTATAGC ATTC TGTATCGCGGACAGCGATG TAAACA TAACTCTTAACTTT  
TAAAATT CAAACCCAAGGGCTTAGGACAACACACCGT CAAACGCAA GAATGCAAGTGTCCGGAGGCTAGA  
AAGTTATCTTAAACGCAGCCACC TTTAATGCAGCATTGACAAGCCAAGCGTTCATTA GAATCTTCAGGATC  
ACC TAAA AATCATACTCAGCCTCA GAAAAGTCAGATAGGTTATCC GCGCCTTCCAAGACCTCAATCAGC  
CAAGTCCACAAACTCTCTTCCATACAAGC GAAAGGCACGCCAGAATGTT CGAAACCTCTGCTATAGAGG  
AACCGTCTTCTAAA T GAAACTCTTGTATTC TCGTCATCTGCT GAAATGATGAGCTTAGCCATAGGACTCCA  
GAAG GAAA AAGAAAAGATTAGTTAAG AATCGGAGTAGAGGGATTC GAACCCCGACCTATTGCTCCCAA  
GCAACC GCGCTAAC CAGGCTGCGCTAT ACTCCGATTTAAAAAAGTAGGAGCTAAGGAAGTTAGCATATTG  
CCTATATACTAGACAAGG GAAA GATACTATAAA TGCAAATATTC TTCGAACTTCTTCTGAGATATAT  
GTTCAA ACTGGGTATTCGTTCCGGTGTGGAATCGGTTGGCTGTTGT GAATAACTTTA GAGGAAGTTCATGG  
AAAATTGTAGCAATCC CAGTTGTATACTGTTTAC CAAAATATTC CAAA CCTAGATGGCTGATTGATC  
AAAGGGTATGTACAAA TTTAGCGTGTCTCTTGTGTCATCATTTCAA GGTGT TTTCTTTACGCTCTCAGC  
TTCGGCTCGTAT TTTCCCTTCGCTCCT CAAAATATC CAAATCTATTGCGACTTGGCCTGAATTTA GCCTCC  
ACCCGATGGATTTATCTTCTGGATGGGCTTCTCC TTTAATTCAA CGTTAGGGAATTTCTTTTCCTTG  
GGAGCATCCCGGTTGCTCTTACGGTATG TTTACTCCTGTTTTA GTGAATTTTC TCGTCATAACTAAAGG  
AGCGGAGCGTATTGCGGAAGTGCAGCTCGTT TTTCAATTAGAAGCGCTCCAGG TAAA CAAATGCTTTA  
GATGCTGATATTGCTGCTGGAA GGATCGGGTATAGCAGAGCGTCTGT TAAAAAAGCTCTCTTTA GAAG  
AGAGTGATTATTTCTCCGCCATGGAGGGCGTATTC CGC CAAATAAA AGGCGATGCGATAATGAGTTGGGT  
GTTGTTAGGAGTGAATATCC TAGCTGCTCTATT TTTAGGACGAGCTACTCATGTTGGCGA CAAA TGTTA  
ACTGTATTAGGCGATGCTTTAAGT GAGTCAAATTC CAGCATTGCTTACATCGTGTGCAGCAGCAACGCTTA  
TAGC TAAA GTTGGG GAAAAAGAAA GTCTAGCGCAGCATCTGCTAGATTATTATGAGCA GAGTCGCCAGAG  
TTTTCTTTTATTCGC CAAAATCC TATGTGGGATGGCTTGATTTC CAGGAGCTCC TAAAGCTCTGATCCTA  
GGTT TTTTCAGT TTTATTATTCTTAGGGTATAAGAATCCTTCTTCAGGAGAGACTC TTCTCTTCCA GAAAG  
AACGGGTAGAGCAAA TATTGCCTGATGAGGGAGTGG GAAATCC TGCTAA CAAA TACAAGGACGCCCGCAA  
TCAGATTTATCAA GAGTTAGGCGTAGT TTTCCCGGAAGCTATTGTTGTACGTTATGTAACAGGATCTTCT  
CCACGTTTAACTCT TTTCTGGGCAAGAGGTCGC CAAAAGAGAGCTGTCTTGCCCAGCTATACTAGAATCGA  
TTAGGCAGCTAGCTCCA GAAACGATCAGTGAACGCTTCGTTGCTCACTTAGTTGATGAGTTTC GAGAGCA  
TGCATTC TTATCGATAGAAGAGATCC TCCGT TAAA AATATCAGA GAATTC CAAA ATTTCT TTATTGAGA  
GCTCTTGTAGAGAAC GAGTGT CAAA CATTATTC CCTAAGATTC TCGAAGCTATAGATGTATATGGCT  
CTCAATCAAAGAATTC TCAGGAAT TGGTAGAGTGTGTAC GAAA ATATCTTGGGAAGCAAATTTGG TTTATC  
CTTATG GAATCGCCAAGATGTCTTAGAGGTAATTACGATAGACTC TCTGGTTGAGCAG CAAA TGAGAGAT  
TCACAA GAAAAGGTTGTGTTGGATTTAAA T GAAA AAGTAGTTGCTCAGGTGAAGCA TTTATTGCGGGTAG  
GGGAGGGGAAT TTTTC GAGCTATCGTAACGGGATCC GAAA CAAGAAA AGAACT GAAA CGCATAGTGGATCC

TTA TTTCCAGATTATTGGTTTATGCACATAGCGAACTTCCAGAAGAGATCCCTATAACCAAA TTAGGA  
GCGGTGTCTGATGAGGTTTATTATCA TAAAA GAGT TATTGATTAG GAGTTATGTGTTAGTTGTGTAAGG  
GTAGATATTG TTTAAA AATTTTACAAA ATTTAGCCTTATTT TTTAGCAAATAAAA GAAA TTTTT CAAATG  
AAGACTCACGATCTCGCAGATACTTGGCAGCTATATTGGTCGACAAA GAAATCCATCATAGGGATGTCA  
AAATCGAATCC TACCTTCC TTTAG TAAA GAATGTAGCGCATCGGCTTGCTTCAGGAATGCCTTCTCATGT  
AAA GATGGAAGATC TTTATGCTCTGGGGTTGAA GGGTTGATTCGTGCTGTGCAACGT CAAAATCCAGAA  
AAAAGCAAGCGATTCGAGAGCTATGCTCTTTTATCA TAAAAGCTGCGATTATTGATGGAT TGCGCAAC  
AGGAT TGGTACCACGCAGTG TTTATCAAAGAGCCAATCGATTAGCTGATGCGATGGATTC CAAAAGACA  
GAC TTTAGGTAAA GAACCTACTGATGGAGAAC CAAAT GAGTATC TAAA TATTTTACAACAA GAGT TATCC  
CATTGGT TTTCTCCTCTAGACCTGCTCTAGTTC TTTCTTTAAA TGATGATTTCTCCTGCCAAGATGACG  
ATGAGGGGCTTGC TTTAGAAGAGCGCATAGCAGATGAGCGAGCG GAAACCGGATACGATGTCATCA GAAA  
AAAAGAAGCTA TTTCTAT CAAAACAGAAGC CAAACTGGCTCTTGATGAAAAAGAGCGGCAGGTTATGGCT  
C TTTATTACTATGATGACTTGGTAT TAAAAGAAA TTGGGAAGAT TTTAGGAGT GAGC GAGTCCC GAGTTT  
CTCAGATACACTC CAAAGC TTTATTGAAGTTACGAGGTACATTGTCCAGTCTGC TTTAGTAACTGTCTCC  
AGAAGATCC TCTCTGTATT TTTCTATCAATATTC TATTAGAGAAGCGCGTCGTTTT CAAAACGAGGTGT  
CTGCTATCGCTTGCTTGCTATAAAA AAGAACAGGATAGATAAGATGTTGCTAGATAAG TTTATATGGATA  
GATT TTTATGCAACAGTTAATCGATAACCTTAA GAAACGGGGTATTC TAGATAATTC TTTCCGAGGATTA  
GAAAG TTTAACAGTTCTGT TTTCTGCCTA TTTAGGGTTCGATCCAACTGCGCCTTC TTTACACATAGGAC  
ATTGGAT TGGAA CAAA TTT CAAACGTCGATTAGCAGCATATGGAAT CACTC CTGTTGCTCTTGTGGCGG  
AGCTACCGGAAT GATCGGAGATCC TTCTGG TAAA AGTGTGGAGCGTTCATTACTAGATCAGGCACAGGTG  
CTTGATAATAGTAA GAAA ATAGCGGCTGCTCTTGTAGCTATCTTCTGGTATCC GTATTGTGAAT AATG  
CGGAT TGGCTAGGATC TTTAAGTATGGT GGATTT TTTAAGAGATGTTGGGAAGCA TTTCCG TTTAGGTTT  
TATGTTAGC TAAA GACGTAGTGAAGCAGC GAGTCTATTCTGAAGAGG GAAT TAGCTACACT GAGTTCAGT  
TATTTATTGCTGCAGTCTTATGAT CAAA CACATCTC TTTAAA GAGCATAATGTTGTATTACAGTGTGGAG  
GGAGT GATCAGTGGGG GAATATTACTTTCGGGGAT TGATTATATCC GTCGAAGAGGACTAGGGCAGGCTTA  
TGGTCTAACCTATCC CAAACTCACTGATAGCAAAGGAA GAAA ATAGGGAAGACG GAGTCTGGAAC TATC  
TGGCTGGATCCAGCGTTAACTCCTCCTTATGAACTATTC CAATA TTTCTACGCTTGCCAGATCAA GAAA  
TCTCCAAAGTAATGAGA ACTCTTACTCT CAAAGATAACGAAGAAA TT CAAACTCTTGATGAGCG CAAAC  
TAGTGATCCACAAGCTGTGAAGAAA TACATTGCGGAAGTGATCGT TAAAGATGTTTATGGTTCTGAAGGA  
TTAGCTCAGGCTCAAGCCGCAACC GAAAGCTTT CAAACTAGTAAGG GAAAGAGTATTACAGAAGCAGAAC  
TAGTAGCGTTAGTAGAGT CAGGTGTTGGCGT TAAA GTAGCTCGAGCAGATTTAATAGG GAAA CGCTGGTT  
AGATATCGTTGTGGAAC TAGGCT CAAA TTCTCAAGAGGACAAGCTAGAAGACTCATTCAACAGCGAGGT  
CTGTACATCAATCAGGAGCC CAAA GCCGATGAACA GAGTATATTAGACGGGACTCAGTTGTGTTTC GATC  
GTTATGT CAAA TTGTCCCAAGG GAAA AAAAAACAAGTGATAGATCTTAATTAGGAG GGGTCTGTGGC  
TCCAAATACAGATATT GGGTTGATTGG CAAAGCCGTGATGGGCAAAAACCTTGATTGAACATGGT GGAT  
CATGGTT TTTCTGT TTTCTGTCTATAACC GAAGTCCGG CAAAACAGAA GAGTCTTT GAAAGATCATGGAG  
AGAGTGGAGCTCTGCAAGGATTTA CTACGATTC AAGAG CAAA TTCAATC CAAA AAGCGTCTCGTAAGAT  
CATGATCATGAT TAAA GCGGGAGCTCCTGTTGAT GAAATGATTGCCCTCCCTGCTTCC TTTCTTGGAAAGAG  
GGAGATATTC CATTGATGGGG GAATAGCTATTA TTTAGATTC TGAGCGACGCTATGTCGACCT GAAA  
AAGAAGGAATTC TA CAAA TTGGATGGGAGTCTCTGGAGGGGAAGAGGGGGCTA GAAAAGGGCCTCCAT  
TATGCCCGGAGG GAATATAGATGCTTGGCCTGCAATCGTCTCCTATC TTTCAATCC ATAGCTGCTCAGGTG  
GGTGGACGACCC TGTGCTCTT GGAT TGGCACAGGAGGTGCAGGGCAT CAAA TTAAGGCTGTT CACAATG  
GGATCGAATACGG GGATATCCAGTTAA CAAAT GAAA CATATGAGATTC TTAAGACTC GACTTAATCTCTC  
TTTATGAGCAGATAGG GAATATCTTT CAAAATG GAAT CAAACCGATCT GAATAGCTACCTCCTTGAGCA  
GCAGCGCCGT TTTAATAGCAAAAAGATGA GAATGGCAATGCGATTGCTTCTACGATTC TTGATGTTGCTG  
GACAGAAGGGGACTGGGCGTT GGGT CGCAGAGGACGCTATTAAGGCAGGCGTTCC TATGTCCTAATTAT  
TGAATCGGTCTTAGCTCGATAACC TTTGACTTG GAAA GAAGTGGCACAAGGCAGCTCAA GAGTTTCA  
GGGATTCCTCTTCTGTCAACCTCCACAAGAAGCTTCTGCCTTCATTGAGGAT GTGCGAGAGGC CAAAT  
ATGCAGCTAAGATTATCAGTTACGCTCAA GGATTTA TGCTGCTGAAGCAGGTCTCTCAAGA TAAA GGATG  
GGATCTGAATTTA GGTGAGTTAGC CAAA ATATGGCGTGGGGT TGCATTATACAAAGTGCCTTTTATGAT  
AAAATTCATCAAGGT CAAAAA ATAGTCCAGAAGCAC ACTC CAAA ATATTACAAGATTAT TTTAAA AAGG  
TTCTG CAAAATTCAGAAA CAGG TTTCCGGCGAGCTGT CAAA CATGCTATCGGATCTGGTGTAGCTATTCC  
TTGCTTATCTTCTGCACTATCTT TTTATGATGGATATCGTACGGTGGATTC ACC TTTATTC TTAGTGCAA

GGATTAAGAGATTACCAAAGAGCTCATGGTTATGAGCGTCGAGACTGTCCTCGAGGGGAGGTTTATCATA  
CGGATTGGCTAGAAA CCAAGAAA ACTTTTAGAGCA TAAAACAAGAAGGCCAG TAAACTACTGGGTCTTT  
TTTAGAAGCAATATAGCTAGAAGTAGTCTACTC CATTTTAAGGACTTCAACAAACGCCGTGTTCGGAAT  
GGATACTTTTCGAATTC TTTCATTCG TTTC TTCCCTTT TTTC TG CAAATCCCACA ACTTGCCTTTTC TT  
GTGATATCTCCACCATAGCACTTAGCAGTTACATTTTTCGC TAAAGCTC GAATCGTCTCTCTGGCAATAA  
TCTTTTTATTGATGGCCGCTGAATAG GGATTTTAAA AAGCTGAGGAG GGATAACATCTAC GAGTTTC TC  
GCAGATGCTTCTGCC TCAAATTC TGC CAAATCTCTGTGTACAAGGCAG GAAAAGGCATCAACAGCCTCA  
TCATTAATTAGAA TTTC CAGCTTAATGATAGC ACCCTT TTTA TAATCTCCTAACCGTAATCAAAGGAGC  
CGTATCC TTTC GTCACAGA CAAAAG TTATCATT GAAA TCAGAAA CAATCTCATTGAGAGGCAGCTCATA  
T GAAA GCACCAGTCTGTGTTGGTCAAGCATATCTGTT TTTA GACAG ATCCACGCTT ATCC ATACAAAGG  
CTCATAATATTGCTGAGATACTC TTGAGGCGTAATGATATTAACATGGACCC AAGGCTCCTCCATGTGTT  
CAATAAGAGCTGGGT CAGGATATGCTGTT GGGT TATCAA TAAA AA GGGT CAAA CCATTT TTTA AGACGAC  
CAAA TAGATAACGCTAGGAGCTGTAGCAATAATATCGAGATCAAATTC TCTAGAG ATTCTCTCAAAGATG  
A TTTC TAAGTGACGAGTCC TAAA ATCC ACAGCGGA ACCCAAATCC GAGAGAGT GACTGCTCTCTTGTT  
CAATCGTAAGAGCT GAGTCG TTTA GCTGCAACCGGCC TAGAGCATC TTTC AGGGTATCAAAGTCAGAAGA  
ATCTATAGGATAGATAACCAGCAAACACTACAGG CAAA ATTTCTTTAAAGCCTTC TAAAGGCTC TTTAGCA  
GGATG TTTAACAGTAGTACTGTATCGCCAATT TTTACATCCTTTA CTTTT TTTAGGTTGGCAATGAAGT  
ATCC CACTTGTCCGGCTCGTAA GGATCC TTCCATGAGAGTAGCTTCCGGTAAAGAAA GCTCCTATTC CTA  
GACCTCAAAGAGGAGCC CAAA GTTGCCATGAAGTAATGCGATCTCCCTT CAAA ATTTCTCCACTGATC  
ACGCGTACATAAAA CCATGATTC CTACATAAGGAT CGTAGTGAGAAT CAAAGATCAAAGC TTTAAGTTCTG  
TTTC CTGTGGAGGT CAAA GTGGGGAAACGAGT CGTATAATAGACTC TAAA ATTTCAGGGATACCTTGACC  
TGT TTTC GCTGAGCAAGCAATGGTG CAAA AAGTATCTAATCC GATGAACTC TTCGA CAAATTTTT TTTA TA  
GCTTCTGGTTGAGCAGCAGGTAAGTCTAT TTTATTTAAAACAG GAAT GATTTCTAAA TCTCGTTCTAGAG  
CCAGATATACATTAGCTAAGC CAAA AGCTTGAACACCTTGGGCAGCATCTACTATAAGCAGCGCTCCTTC  
ACAAGCTGCTAGTGATCG GGATACTTCATAAGAG AAA TCTACGTGTCCAGGGGT ATCTATTAGATT GAGT  
TCGTAAGTCTCCCCTTCGT ATTC ATAGGTCATAGTGACC GGATGCGC CAAAATGTAATCC CGCGTTCTC  
TTTC TAGATCC ATAGAAT CAAA AGTTGTTTCGCGCATCTCTC CAAA TTCGATAGTACTAGTAC TTTC TAA  
CAAACGATCTGCGATCGTAGATTTCCCGTGGTCGATATGAGCAATGATAGAAA AATTAC GAATGTTCTCA  
AT TTTA TACGG TTTC AATGTT TTTA ACC GAGTT CAAA CTTC GAAA AGGACATGTTAACG GAATGTTGAGT  
TGTCTATCTAGAGAAA AGTAATCTAGATCTAGAAGAG TTTATAAAA AAAGGCGAGG GGATT CAAA AACACA  
AAAGAAA AGCCCCGTCGAGATAGAACGGGGCTTCTTT TTTA GAGAAT TTTAGAAA GTCTTATTAAGAAA  
CACCTTCTATAGCAGGAGC GGATTC TTTA GCCGCAAGAAGCTTCCTTCTCTGCTGCAGCTTCTGTC  
TAATTC CTGTTT TTTA GCAGC GGAT GCAGCCAAGAACAG CAAATTTA GTTA GTTGACAGTCAACCAG  
ACCATGATAATTGCAAAGAGAGCAACAGCTAG GAAT GGAGT CATAGCGCCGATGCTTCCGCAAACGACCA  
AGAGACCTTGTT GGAT CAAAGATCC CCCAGA TTTA CC GAAT CTAGCGGCAACAACGTCAATAGCAGC TTT  
CCC TTTA ACTT CAAA CTCTTGATCC AATG GGAT GTAAGCCAGCTC TTTAGTTGCATCAAAGAGAGCATAT  
TTA GTTGA CAAAGAAA GAATAT CAAA AATGGCTCCGACAACAACGGCTAGCATTAGTGGTGTGTTCCCA  
AAGCAGCAACTAAA CCTGTAGCATGATCTCTGAAGATAACGAGAGCAAAGAAGACAGCTCCTGTTACGAG  
AACCATGATAGGTGTAACCAAAGCTCCAGTTAACCAACC GAAT CTAC GGATAACGTTACCACCGATGAAG  
AGCATTACAAATACAGATACA ACTC CTGTCCA GAAA GAGAAGTTCCCATAAA TCGCGTGTAGTCA CAAA  
GAT TAGG GAAT TGCAT CAAAAGT TGGCT TTTC CAAGTTACTTCAACGAGGTTAATGCAG ATTC CGTAGCA  
AATAACTAGAAGAGCTAGAAGAAGCATATAAGGAGATCTTAACAGATAAGAGAAGC TTTC GCCCATGCTC  
ATCTTAGG TTTA GA TTTC TTAGC CAAA AGCTCTGCAG GAT TGTA GAAT CTAGGAT CTGTAAGCACGTAGC  
GGTTC ATCC ACCAGTAGCAAGCAGCAATAATAGCGCAAGAACAAGAACATAGCCATTAG GAAA TAGAG  
GCTGACTC CCCAT GGGT CAACGCC TTCGCCAAGGCTAGCACGTAA TTTAGAAGACCAGATAATAGCTGGA  
CCAGAAA TTAAGAGAGCTACGTTAGCTCCT ACTC C GAAA AGAGCGTA GAAA CG TTTA GCTTCCGTAAT TT  
TAGTAA TTTC ATTGGCAAAGCCCAGAACATCAAAGAGAGCATAACGCTTCCCCAAAGTTCAGAAA GCAC  
GTAGAACACAGCAAAATGTCCAGTTGCGTAGCATCGCAAT GAATCC CA TAAA TCC GGAAGGAA GAATGGAT  
TGTA GAGTATCAGC GAAA GCTGTT GGGT GAA GAAT ATGACGGCAA GGGTAGATCACCACAGGGAAACAGTG  
CGAA GAAT ACAAC GAAT GGTGAGAGCACTGCGAA GAAA AGAGCCTG CAAATTC AAAATATTGCTTAGCTT  
GGCGTAGATCAGCATGAACACAACAGCAGAAGGGACGACTAGCCACA ACTTAAT GAAA GAAT GGCCTCT  
GCTCCAG ATCC CGGTGTGTAAACGATAA GAGTATCT CAAA TATCTCTCAAATCGTGTAAATT GAAT GAAA  
TACAGAAGAACATTAGGAACATTGGCAGAAC TTTC TTCAGCTCATGCATGTGTATCGGCCAAAG GAAA GA

GCGCAATTTTC CAAAAGGTTTTC CGCGG CAAAAGT CATATTTCC ACCCTCT GAAAAGCTTATGTTTATTG  
TTAAGTTTTC CAAA TTGATCAAATCAACGAAGA TTTAAAGTATTTCTTTAAA AAGTCGT GAAAAAAT CAA  
AATTTTCACGACTC CCTA TTTCCGGCT GAATCTTCGATTACGTGAGGAGGAGATGCCCTCC ACTC AAGGAGC  
CCAGGAGGGCG GAA TAAA AAATGGCA GAAATCC AACCTTTAG GAAA A GAGTATAACCACAAAGGTCCTCGG  
AAGGCAATA GAAAAGGGCTGTATGCTGAACAAGCAGAA GGGTCCACTGAGAAT GAGCCTCTGA GAAA AAA  
AAGCTTTTAT TAAA AAAT TAAA AAAAGAC TTTA CAAA ACTTATTC TGTAGGTTGA GAAA GAGCTTCAACG  
TAAGCATTTCCAAAGCTCCGTACTTACAATATTATTGC GGATAGAGC GAATTAATTC TCTTTTTA GTGATG  
GAAGAGGTTT CAAA GGGCTGAAGCGAGCCAAAAGATC TTTA TCGCCA ACTTGACGAGCTAACTC TAAC AC  
CCGTTTCGATATCGGTT CAAAT GAAA TTCACAAAGTCTCTGCGCTT TTTAGA ACTCGAGGAGCTCGTGGT  
TTA GGGCTAAT GGATCTGGGAGT GATAGAAT CGATCACA AACGTC TTTAACATT TTTA ACAGTTGCTCAG  
GAGCAGAGT TCTTCATTTTT TTTAAAG TAAAATGGTGCATGTAGCCGCCTGTTGGCCCTGGGAGATAACG  
ACAAAGATCAT TTTCTTTACTTCTCCGAC CAAA CTAATCGC TTTA GTTATGAGCTGCTCTA TTTCTTCT  
TGGATAGTAATCTGTGCCGTAGCCAT GAATAGCTCCTTAGT GGGTAGTCTAGTTCTACAGATGGTAGTT C  
AAAC TTTA TTAATTGTAATAGTCAACTAAGTCTGTTTT TTTTCGAT TTTAATGTTCACTC GAAATAAA AATC  
AATTAGTGT TTTA TCTCAAAGT GAATTC TATAGTGGTT CAAACTTT TTTTCGCAATCTCAT TTTAGAGATTT  
CAAAA CAAAGACAAAA GAAAATGAAGTACTTCAGATTGT TTTCTAAG CAAACAAA CATAAA CAGCCATCA  
TTTTTATG CAGGTTAGTAGCAGAAA TCTG CAAA GAACAAT TTTACT TTTCTTCAGACTCTTTA TAGTTGC  
AAACTTAGAAA ACACGTATTAGTATGCATT TTTCTTAGTTGT TAAA ATTATTTA GAATTGTCTCTTCGAG  
ATGAGAAA CGCGCTAGAT TTTTC TTTTCGGTTGA GAATA TAAA TTCATCCTGTTAAA AGTATCTTCGCGAT  
AAGCGAGGTTCTT CAAA TGGAGGGGAGCTCCTTACAGGAGGCTTGT ATCC TTTAAA ATAGAGT TTTCT  
TATG ACCCATGTGGCGATAGGCC GGGTCTAGCGCCGATAGTA GAAA TATCGGTTGGTT CAAA TCCTTGA  
GGGATCGTATACTT TTTCCAAAGTATGGTCCCCGTATCGATTATCTGGAGGCTCTTATGTCTTTT TTTCA  
TACTA GAAAATATAAGCTT ATCC TCAGAGGACTC TTGTG TTTAGCAGGCTG TTTCTTAATGAACAGCTGT  
TCCTCTAGTCGAG GAAA TCAACCCGCTGATGAGAGCATCTATGTCTTGTCTAT GAAT CGCATGA CAAATG  
ATTGCGTGTCTCGCATAACTGGGGAT CGAGTCAAGAAT ATTGTTCTGATTGATGGAGCGATTG ATCC TCA  
TTCATATGAGATGGTGAAGGGGGAT GAAGACC GAATGGCTATGAGCCAGCTGATTT CAAACAATGG TTTA  
GGTTTAGAGCATT CAGCTAGTTTACG TAAA CATTTA GAGGGT AACCCAAAAGTCGTTGATTTA GGTCAAC  
G CAAA CTTAACAAAAC TGT CAAA ATCTTCTGAGT GAAGAAGGATTC CCTG ACCACATA CAAA GACGGA  
TATGAGAGTATGGGCTGCTGCTG TAAA AGAGATGGCTGCGGCATTAATTC AACAA TTTCTCAATATGAA  
GAAGAT TTTCCAAA GAATGCGGAT CAGATCTTATCAGAGATGGAGGA ACTTGATCGTTGGGCAGTGCCTT  
CTCTCTACGATTCCT GAAAAAAATCGCTA TTTA GTCACAGGCCACAATGCGTTCAGTTACT TTTACTCG  
TCGGTATCT ATCC TCTGATGCGGAGA GAGTGTCTGGG GAATGGAGATCGCGTTGCA TTTCTCCAGAAGGG  
TTGTCTCCTGAGGCTCAGATTAGT ATCC GAGATATTATGCGTGTAGTGGAGT ATATCTCTGCAAACGATG  
TAGAAGTTGTCTT TTTAGAGGATACGT TAAATCAAGATGC CAAA GAAA GATTG TTTCTTGCTCTAAGAG  
CGGACAAAAGATTC GTCTCGCTAAGTCTCC TTTA TATAGCGATAATGTCTGTGATAACTAT TTTAGCACG  
TTCCAGCACAAATGTCGCACAATTACAGAAGAAT TGGGAGGGACTGTTCTT GAATAGAGATAATGCAATT  
GCTTGGTCCGTAGA GGATC CAAA TGTTAATTATGATC ACTCAGACGCTTATGTACATTACTT TTTCTC  
TGCCGTCAGGGGCAATGGCTGCTATTATTGGGCC GAATGGAGCTGG TAAAAGTAC CAAA CTTAAGGCTTC  
TTTAGACTGATTC GTGCTTCTTCTGGCCAAAGCTTGTTC CAAA GTCAGAGAT TTTCCAAAGGCACATCAT  
AGAATAGCCTATATGCCCAAAGAGCGAGTGT GGAT TGGGATTTCCCAATGACTGTTCTTGATCTCGTGT  
TGATGGGGT GTTACGGCTA TAAA GGAATATGGAATCGTATTTCCACTGATGATCGTCAGGAGGCTATGCG  
TAT TTTAGAGC GGGT TGG CAAA GAAGCT CAAA CAAATCGTCAAATAGGTAAGCTCTCTGGAGGACAACAA  
CAGAGAGCTTT TTTAGCGCGGTCA TTAATGCAAAAAGCAGA CAAA TATCTCAT GGATGAGCTGTTCTCTG  
CGATCGATATGGCCTCTTATCAGATGGTTGTAGATGT CAAA CAAGAGCT TAAA AGCGAAGGGAAGACTAT  
TGTGGTCA TTTATCATGA CAAAAGT AATGTCCGGAAGCTT CAAA ATCATGTGAT TTTAT TAAA TAAGCAT  
CTTGTGTGCTCTGGAAGCGTAGAA GAATGCTTGAC TAAA GAAGCCATT TTTCCAGGCTTATGGGTGTGAAC  
TTGAGCT CAAAGAT TACAC ACTCAAATGTCTAGAGGCAAGTACCAAGGATCGTGCTAGATGCT GAGTTG  
TATA TTTCCAGGACACTATC TTTCTATCCAGTTT CAAA GCAG TTTCCGCTGACAAA CATGACGACTGCCTTG  
TGGGGACT ATTC TTTAGTTGAGAGACAGCCCTTATTAAGTGAGAGCC TTTCTCATGCTTGTATCCAG  
GGCT TTTAATAGGTGCCCTTC TTTCTTA TAAA GTTCCGTGCAT TTTCCAGATTC CAAA TGGGTATTATCTT  
T CAAA GTTGCCTAGCTTCTGTCTTG GGATGTTTA GGAATCTCATT TTTAGAAA GAAA TTAGCTATGCAT  
AAA GATTCAGC TTTA TGTTTAGT CAAA GTTTCATT CAAAGCGTAG GGGTGATTC TTGTTAGTTACGTCA  
AAGATTGCTGCCCTCT TTTATACAACAAGATTAATGCATA CAAA TACGGCCAAGCGGCGAC TTTAGGGTA

TACAGAAGCCAAGCTTGCATTGATCATTCAAATTTATCAGCTGTAGTGTGTGGTGGTGGTACAGACAA  
AATTCGTAGCTATTCAAATAGAGAAACAAACGTAATTCCTGTGGATTAAGAACCGGTACAGCAGAACTCG  
TTGTTCCTCGTATTATTTCGTTGGTCATAGTCAGTGGTGTGCGTTCGTAGGAATTCCTACTCAATTCGTC  
TATGTTCTGTTGCCCTCCTTTATCTGCCAGACAGCTTTCGGATAGATTAAGTACAATCTTAATTCATCG  
AGTATTCAAAGGGGTACAAACGGGGCTTTAGGATGCTATTTTTCGTAGCTTTTACTTGTCTAGACTGTAG  
TGGAAGGGAAGCCTATATCGATTATTCCTTCTACAGGACCCTGTGTGTTCCTTCGCGGGAGTGCTAGT  
TTTCCTATGTTTAATTTTTCATGGAACACGGGTGGATCACTCGCTATTCGGAAGGAAATGGTCTTA  
TTTCCTCGAGATGAAGAACATCTATTGAAATCTCAAAGTATTACGAGAACAATACTATCAAGTAG  
GTGTGAGAGATCAAACTCGTTCTAGAAAGTACCAAGAGTATCAAAAGTATAAGGTAATTCCTCAGATTTAG  
GATGTTTTAATCTGTGTAATAAGGGATAGTCTCCTGTTCGGAACATCAATGGTCCTTAACAGATAAAGGA  
TTAGCTAGAGCTGCTAAAATTAGTGCCTGCTCATCGACCAAAAGGAATCTTATCTGGTGAGTCAGTTAGGT  
TTAATAAGAACGAAGTACATCAATTCGCGAAAGAAATGGAGCATGTCAAACACAGATGAATTAGATTCTAC  
CTGTGTCGAGATGTTGCAAGATCCGATTACGATCCGCATCAGCGAGAGATTCCAAACGAACAAGGAAG  
TCGGATGGTTGCTAGTATTCCTCCGTAACGGAGTATCATTTTAGAGTTTTTCCTAGTCTTTTTCCTC  
CGGCTTTTTCCTGGGAAGCTGTCTTAACGATCAAAATATATCGATGACATTCAGGTGATCGTGTTCCAA  
CAATAGCAGTTTCCTGTCTGTAGTAGGGACTTTTTAGTGCTTAAAAGATGGCTATGTATGCGAATGT  
AGTTTCCTATACTATATTGCAAAGGTGGTCTGTGCTGTCTTTATTTACTCATCAGCTCATTCAATTTATCT  
ATGCAAGCATTGACTATCGCTGCAGTCTCAACAACTTTACTGACCGGAGCATCCATTCATTTTATTCGGA  
ATGTAATTAAGGTAGCAGAAGAAGCAAGCACAGCTTTAGTCTTTTCCTCTTGTTCCTAGCTAGTTTATT  
ACTGCTTGTGTTCAAACCTCGTAACGCGCATGTAGGGACCAGCTTGTCTATTGGTAATGCGGATGCTTTA  
GCTAAAACAGATATTCCTCCCTATATTTTTAGTTTAAATTAACTTGGGTAATTCCTACTGCTTTTCCT  
CAAGTCAAACAAAATGATCTCAAATACGATTCAAACCTTTTCTTTAGGTATTCGAGTCCGCTTTGTAGA  
CTATCTCGTTATGCTCAAACCTCAGCTTCTATTGTTGGAGCTTTTAAAGCGGTTGGCGTGTGATGTCC  
AAAGCTTTTCCTACTCATTCCTGGGTGATCGAAAATGATAGCCTCTTCTGTTCAAGAGATGATGGTGT  
ATTCATGGTTCAAAGAGGCAAAGCAGCAAATGCCCCGGCTCTTTCCTAGATCCATTCCTTCGGTTTA  
CGGAATCGGTCTATCTACTTCAGGATAGCTGTGCGTCTACTACTTGTGTTTAAATGTAGTTATGTTAGTG  
TTCCGCAAATTCAAAAGGGCTATTATGCTCCGTCAAAACCTTGATAAGTAAGGCAATGTAGAGAATACGA  
GGTCTCAAAGCAATTTAGCACTGATTGGGTCAACAGGAGTATTGGTAGACAGGTTTTACAAGTAGTT  
CGTCTATTCCTGATACTTTAATATAGAAACTCTTGTGCGTATGGACGGAATCAAGAAGCATTGATCT  
CTCAGATTAGAGAGTTAATCCCTCGAGTGGTAGCCGTTCTGTAAGAAACAACCTTACAAGGAGCTCCGTAA  
GTTATTCCTCATATTGAGATTCTTTAGGAGAAGAGGGGTAGTTTCCTGTTGCTACAGAACCCTTCTGTA  
ACAATAACCATTGTAGCTTCTGCTGTTATAGATGCTTTACCAGCAGTCATTGCAGCTATCCGACAGAAAA  
AGACAATAGCAAAGCTAAATAAGAGTCTGTTAGTGGCAGCTGGAGAGTGGTTACCACCAAAGCTAGAGA  
GAATGGTGTGCAGATTCCTCCATCGATAGTGAACATAACGCACTTTCCAGTGTGTAAGGAAGAGAC  
TCTTCTACCATTAAAATAATTATTGTTAACAGCTTCTGGAGGCGTTAAGGAATAAACTCAAAGAAAGAA  
TACAAAAGGTCTCTTTACAAGAGGCTTTCGACACCCCTGCAAAGAATATGGGGCCCAAATACAGTAGA  
TTCCTTCTACCTTAGTAAATAAAGGCTTAGAAATATAGAAGCTTTCCTGGCTACAAAGGCTGGAAGCTGTA  
GAGATAGAGGCGGTGATCCATCCCTCAAAGTCTTGTTCATGGAATGGTGGAGTCAAATGATGGAACGATCC  
TTTCCTGTGATGAAGCCTCCAGTATGCTATTCCTCAATACAACATGTCAAACCTTCCTCAGAACGTAGCCC  
TGCAATAGGTCCAAGATTCGATTTTCCTTCAAATCGCACTCTAGAGTTCCTCCGATAGATGAAGATAGA  
TTCCTTAGTGTTCATCTAGCGAAGCGAGTGTCTTCTTAAAAGGGTCTATGGGGTGTTCCTTCAATGGCG  
CCAATGAGGCCAAAGTTCATCGATTTTTAGCAGGCGAGATTCCTTGGCATCAAATAGTTCCTAAAATTACA  
AGCTCTTGTGGATCAGCATCGCGTGAATCCTGTTTATCCCTGGAAAGAAATTCCTATCGGTAGATGCTGAG  
GCCAGAGCTCGTGCTCAAAGAGTGTAACTATTCCTATGTTCTGTGGATGTCAGTTTTCCTGATAGTGGTG  
CGGAAAATAACGATTCCTGTGTAGTATAGGGACGGCTCAAATCAAATGAGCGCTTATAGTATCTTAGGC  
TTCTGATAGAGGCTTGTATAGCAGCTGTTTAAGTAGAGTATAGTCTGGCTTAGAACAAAGATCATTCA  
GGTATATAAGATATGACAATAATATATCAAATCTTGCAGCCCTGGCTTTTAGGTTCCTGATTTTAATTC  
ATGAACTTGGCCAATTTATTAGCAGCAAAGCTGTGCGAATGTCTGTAGAGAGTTTCAGTATAGGGCAAAG  
CCCAGCTCTTGTTCGAAAGAAAATAGGGAGCGTTGAGTACCAGGATAGGAGCGATTCCTCAAAGGGGATAT  
GTTTCGTATCAAAGGTATGGATAGAAAATGATAAAAGCAATTCCTGGAGACAAAGAGAAAACCTGTTTACGATA  
TCCCAGAAGGCTTTTTAGTAAGTCGCCTTGGAAAGCGATTCAAATTTTAGCCGAGGCCCTTTAGCTAA  
CCTACTTGTGGCTATACAAATTTTCGGATTCCTATTTCCTGGTGGTAGAACAAAATCATTTTCCTGAA  
CACACCAGCATTGTAGGTTGGGTGCACCCCTCAAAGAGCAACAAGGCTTACATGCAGGAGATCAGATTT

TC T CAAA TAATGGGCAGCCTT ATTC TGGGCA TAAA ATGGCTT TTTC ATCTTCTCTTCTT GAAAGAAA GCT  
ATCGTTGCAAGGGCAGC ATCC AGCCTACT TTTC T GAGT CCGAGGCTT TTTC ATTAGAAGCACC G TTAAAT  
CC TGATATGGAAG GAGT TCCTTG TTTA GGAGCTAGTTATCTGCTGTATCGA GGATCC GATCC TTACCTG  
AAA AATCTCC TTTA GTAGACGCT GGAT TGTCTGAAGGAGATCGTCTAGTAT GGATGGATGGGT TGTTAGT  
CT TTTC TGGAGCACAA G TTTC TCAAATGCTCAAT GAAA AGCAATCC TT CAAA AGGGT TGAGCGTCAAGGG  
AAGGTGGTG CAAA TTCGTCAAGCTA GAGT CCTAGCGGGAGA TTTA ACTCTC ACTC CGTAT TTAAAA AACG  
AACTC ATAGATTGTCAGTATGAAGCAGGTCT TAAA GGCAAATGGGCTTCATTGTACATGCTCCCATATAT  
TATTAATGG GGAT GGT CAAATT GAAA GTAAGGTCAAACCTGCTCAACAATGAGC GGGT ATC CAAA GACTAT  
AATCTA GAGT TAGGCGACAAAATCGTAGCCGTTGATG GAATCC CTGTCATGAGCAATGC GGATAT TTAC  
GTCTTGTTC AAGATCATA GAGT GTC CAAAATA TTTC AAAGGAT GTCTCCAGAGCAGCTGACTGT TTTA GA  
GCAGAAGGCTGCAGATCAGGCA TTTA TTAATTC CTATGATATGGACGATCTTCTACGTGTTGCAGAGT CT  
GTTGGAGAGGAACGTGAGGT ATCC CG TTTA GGGGAT TATCG CAAA GTAACAC GGGT GCAGCCTAGACCTT  
GGGCACATA TTTA TTC TGAGGCGTTGTTGGACAAAACAGCGAGCTCTTGC ATCC AAGT TCCGAGATGAACA  
AGAGAGACGTTATTATCTC GAAA GAAT AGAAGCC GAAA AACAGC GGA TTTC TTTA GGC ATTC CCCTTAAG  
GAT CTAGCCGTT CAGTACAATCCGGATCCCTGGGT ATTGATGGAG GAATCCG TTTC AGACAGCT TAAA GA  
CTGT GAAA GCCTTGG GGAT GGGGC GGGT GAGCCCTCAATGGCTATCAGGACCTGTAG GAAT TGTGCGTAT  
TC CCATACAGGAT GGTCTGTAG GGATTC CTGAGGC CAAAGCTT GGAT CGGGT TGATCAGTG TAAA CCTA  
GCAGTGT GAAT CTACTTCTATCC CTGTATT GGAT GGCGTTATATACT CAAATG TTAT TGGGAGATTC  
TTTC CAGACGTCGAT TAAA ATATGCGGCTCGTTGA GAAA GCTCTTGTCCCG TTTA TGATTC TATTGTCCT  
ATTT CAAAT ATTC TTGACCC TCCAAGACC TTTC TAGAGT TTTC GTT GGGT GATGTTCTACTT CAAAGGAA  
CCCG TAAA GGCTATAG GGGT GAGCTCCTAAGCAGT GAATAACGTAGATATC TTTA CTCT TTTCTTTA TTC  
AC CAAA GC TTTA GGAGATTGTTGTATGCTCGCCTCTATCTCTTCTGGACTT GGGT AAGAGCAGAGCTTC  
TACTCCG TTTC TTAGGA ACTC CCTCATTAAGAAT AGGGAGGT CAAA TTCGTAATGATGTATGTGTGATT  
CGCATCAATGATGTAGT CAAA GTGTG GAGTATCTAATCTTG TTTC TGTTACACAGACCTTGCCATCATA  
TCTTCTCTAATT GAAA CAGTA GAAA CTTACT TTTC TTAGTTC CACTTAATACGAGAACATCAACAGAAG  
AAGGCATT CAAA CAATGTTCAACATATGCTCAGGGCTATATGTAAGAAGCTGCATACCAAGC TTTC TGCC  
AAAGACAAATTGCAC TAAA GAGCTTCGGCTATAGCGTCTTGCTAATGTAG ACCC TGCATTAGGAGCGCC  
ATAAGACC GC CAAA CCTTTT TTA GCTTCTTCAGGACAATCG GGAT GAGCTAATGCTACACGAACAATAA  
CTC CTCTACG GAAT GCGTAAC GAAA TTAATCGGTATACCAGG TTTC AGTTCGCAATCTTATT GAGTAA  
TCGAACAAGATGTT CAGCATGTT TTTC TAATG TAAA T TTTC GGG TTTC ATAGTTC CAAAT GAAA ACATCA  
TAGT TTTC TTTTTC CAGA ACCC GGCCAATAGGT TTTA GCGAACCATAGGAT CTTA GAAA CCGGTGAACGC  
ACACAACAG ATTC CT TTTC TTCGCTATC GAGTTC ACCC CAGCA ACCC CTGATGTCAATG CAAA AATCAC  
AGAG GGAT CAGCTAATAGGGAAGT TCCATTAATA GAAA GAGT ATAGTTAA TAAA AAATTC TTCA TTTCG  
CAACACCGATTAATATTTAT TTAAAA TAAG CAAAT TTTA TAAA AACAGGTG TTATTTA CTTAG CAAAT  
TA TGTG ATCC AAACATCTTT TTTA TCAA TAAAATAAA ACAACAAAG CAAATTTCA ATTAACAACAGTT CA  
AACGAAGGAGAAA TTATAGAGATTGAGGAGCTACAAG GGAT ACTTGAGCTTGTGTACAT GAAA AATGCA  
GGAT GTTGTGCTGCGGTGATCTGGACAAATAGTAGAAGTTGTAACCACTTGCCC TAAA GAG CAAA AGAGT  
TGCAGAAGCTGATC TAAA CGCTGTTGATCTAGACAAGCAT GGAT GTC ATCC ATGCACAGAAGA GGATGGA  
TACAAA ACTC TTCTTGAAGATACACGC ATTC AGCAAATCGAAGAACGGC TAAA AGC GAAT GTT CAAA GCC  
TTCGCTG GAAA TTTA GCAACAGGAAGATCATTGATAGTTAGAAG GAGTTCGTCCCGATGGGGCCCTACC  
ATAGTATAGCCAAGATCGAGGTCTTAGTA CAAA CTATGCGAAGTTGTTTCGTAGTAATT ACTC GCTATGT  
CATTGAGGGTAGG GGATTC CTCTGTAATGAGAGA ACTC TCATAACGAAGAGATA GAGTCTCT TTTA ACGT  
ATT ATCC CAAAGAG CAAAAA GATCGTA TTTA GCTT TTTA GTAC ATTC ATTGCGTAAGAAGGCTACCAGA  
CTACCATAAGCAATCAATGGG GAATTC CATGCA GAAA TAGC TTTC TGATTC TGAGC TTTA ATAGAAGCGT  
TACGCTGGTC TAAA GC CAAATGGTAGAGAGAAA TATGCTCGGTGTA TTATCTGAAGCTTGTGCTAGTAA  
GAGGTC TAAAAAACGACGACGTTCTGAAGGGGAGCCTTCAATAATGCTATGTC CAAA ATG GAAA ACAA  
ATAACAG GAAA TAA ACC TACTAGCTCAGA GAGT TTC GTAATAGGAGCTCCGTCAAACA GGATCTTCTTCC  
CTTT TTATCC ACTT GAATAGAAA GAGT ATGAAA AACCTC TTTA TGCGAGAACACAGCTTCTA TAAA AAA  
GTG GGAT GCTCCAAAACGTATGGCATCGGT CAGTCGACTAGTTC GAAA AGACCTACCTAGTGATA GAATG  
TACAGAGCCTCAAGAAG ATTC GTC TTTC CTTGTGCATTAAGACCGAAGATG GAATTC ATCTCCGGTCCTA  
ATTC TAAA CGAAGATCTGTATAA TTTC T GAAATCC TTA GAAATAAAGAAA GAACCC GCATTAATCGTCA  
TGTAATCTCATGGGCATGATGACAAAACAGCTGC GAGTGGAGT CTGTAATGATTC CTGGATTGTAA GAAT  
CTGAGATACCTAATTGAACAAGTTCATCACGGCTGTG TTTC AGAAT GTCTAAGAAGAA GAAAGGAT TAAA

GGCTA TTTCTAGGG TTTCCACCAGTATAATTGACAGCCATACTTACCTTGCCTTCTCCTACT CAAA TGCAG  
TTGGCTGTAA GAGT TAGTTCTCCAGGTGAGAAGC TAAACAAAACA GAATGCGAAG ACTCATTAGT GAAAA  
GGGCCACTTG CAAA AGAAGGGAGATCAGTTCTTCACGATGTAGATCTAATTGTACACTGCTAT GAGT GGA  
GATCACAGGG GAAA AGTCCGG GAATTC ACCA GAAA GAG CAAA GTTACTAATAGTGTAT TTTCCACATTCG  
ACAGCGAT TTTAG CAAA ATCTAA GAAA ATAGT GGAT TGAACATCTTCCGAAGACATGC GAATAA TTTCTT  
CGACGGC CAAA ATAG GGAT GATATAGTCTCCT GAAA AACTAGGATC TAAAGAAA TCTCTGTATCGATCTT  
AGCTAACCG TTTCCCATCAGTTCCACGACTGTCATAGTTCC ATTC GCAATAGAAA TAAAACGCCAGTG  
AGTACATAGCGACTC TCTTCTCT GGAT ACAGCAAAAGAGGTTT CAAA GAACATGTCT TTTAATCGCTCAG  
AATCCAGAGT GAAA CGCAGAGCAT CAAA CATATCAGGAAGCATAGG GAAATCTTC TTTCCCCATACTTAA  
CAGGC GAAA ACAGGAAGA ACCCGACGTGATTGTCGCCA TTTCTCCA GAATGAGCTGCTACTTCAATA CAA  
ACCTCTGTAACTC AC GAATGAGT TGGAA GAAT CTTCGAGAAG GGAT GGTAACAGATCCAGACTC ATAGA  
CC CAAA TTTAACAACACAAC GAGT GCTGACCGTCAGGTCTGTAGCCGT GAAA ACCA ACTCATCGTTACA  
GC TTTCAATGAGT ACAT GAGT CAATACTG GAAT TGGCGTGC CAAA TGGAACGACATTC TGAACTTT TTTA  
ATTAGA TTTCTAATTC ATTGCGGGAGATAAC GAA TTTCAATTAT TTTCTGTAAATCATGTAAGTCTG CAA  
AGAATGAATA ACCATGT CAAA TGACATGGAAGCAAGTAAGTCGTCTCTCGGGGCTAGC TTTAG TAAA AAA  
TATCTTGACAAAAGAC GGACAAAAA AAGCCCCATGAAGGCG GAAA TTCACATGGTACTTGTGATTAGG  
AT TATTATCAATGACAAAGGAAGAAT CCT TTTAAGGAGAGGGGCATACGGTTC TTTCAAGAAGAAGCC  
CTT CAAA CTATACTC TCCTTAGTT TTTAAGAGG TAAA AACATGGGCGTTAAGGAAA TTG TTTT GAAT CGC  
AAAGCT TTTTCATCATTACGAGGT TTTAGAGACCTT GGATGCAG GGAT TGT TTTAACAGGAACAGAAA TTA  
AA TCTCTGCGAGATCATGGTG GAAACAAAGGGGAT GCTTATGTGACGATCTCTAAGGGAGAAGCTTGGCT  
ATTACAGTCAAGTATAGCTCCATATCGG CAAA GAAT ATCAATAATCATGAAGAGCGCCGCAAGCGCAA  
CTTCT TTTACATAAGTACGAGATTC ACAAACTAGACGCTCGCA TTTCTCAAAG GGAT TGACGGTTGTGC  
CGCTTAGCTTT TTTCT TTTCTAAA GGACAAATCAAGGTGCGTATTGGCTGTTGCCGAGGGAA GAAA GCTCA  
TGATAAGCGGCAGTCTATTATTGAACGAGAAA GAAT CGTGAAT TGGCTGCAGCTAT GAAA CGTCTTGT  
CGGTAATATATGCGCAAAGATG TTTCTTACAAA CCGAGTCAAGAGCTTCTTGT TTTA GAGGAGAAGGTCGT  
CAGTGCAGTAGCCATAGC ATCC GCAAAGGCGCAGC TTTCTGTTGATCACG GAAA CTGCAAGGAT GGAT GG  
CTGCTATCTTCTAGAG GAGT TCCCCTTAAC GGGT CAAGAATGT GGGT GTAGGT CAAA TTGTCCACATGCC  
ATCGTTGATATTG ACTCCCGCTCGTCGCTATAGCATGATCATGCAGATGAAGAAT CTCTGGGGTAGCTGA  
TGAAGCGACAGCCCAAGATCTTCCGAA GGATG TTTCTCCTCTGGT CAAAATTTCTCCTCCCATTCTACG  
TAGTAAT CAAAACAGAAT TGAGCACAAAGCTGTTCCCTAATAGATCTACAGCAAACCT TTTA CAGTTCCGC  
AGAGATCTAATTGGACGAGAGGC GAAA G TTTCTCT TAAAG CAAA CTGGGT TTTATCAAGAGAAA TCAGATG  
CC ATCCAGAGCTGTG CAAA TAGAGGTGTTGGAGCTCTTGAAGAAG GGATAGTATG GGAT TTTA GGTGCAGT  
AGCCATAAGCTT TTTAAA GCGCCTAAGGTGGAT CAAAACGGCCATCAGAGAAGGCGTG GAAA TGGTCTA  
TTTC GCATAGAAA AGCAAAGAGT GCTGGCGATAAGG GGATAG GGG CAAA CAAA TGGTGCATTAATACG  
GAAAATTTCCGGATAGAGGATTC CAATTAT TAAAAG CAAAATCGATATGATCAAAC ACTCGATCAA TTTCC  
T CAAA CGCTTGTG GAATGCATCTGGA GAAA GTGCTTCTCAAATACAATGCGATAAG GAAT TGT CATA  
GG ACCC CTTCAGAGT AGTTCTTGAAGGAGCTGAACA GGAT TGGAGGAAGAAGGGGGCTAGGAT CAGGAG  
GTATGACGCAAAAAAC TTTCCCATGTA TTTCTCATTAGCATAGCGACGGTCATTGGGCGGACTC CACCAG  
GGACAG GAGT AATGGCTCGGCAAACAGGTACAACAT TGT TAAA ATCGACATCTCTACAAGGAT ATAACC  
TTTA GGATTCGCTGCAG GGATTC TTGAGGTGCCGAC ATCC ATGATCACC GTTT TTTCTGCAATCATCTCT  
TTATTTA CAAAGAGCGGT ACTCCAATAGCT GAAA TGAGAAT ATCTGCAGTCTAGTGATCTCGGTAAGAT  
GCTCAGATTGGCTATGAAGGAGAGT GACACTAGCATTAGTATCTGCATGTC CAAA CATAAGTAAGGCCGC  
TAAA GG TTTACCTACGATATTGCTACGTCCTAAGATAACAACGTGC TTTCCATGGAGAG GGAT CTCATAA  
TACAAA CACAGTTCTACA ATTC CAGCAG GAGT GCATG GGAT TAAA FCCATCTG TTTCTCCAAGAAGTAG TT  
TCCTTACATTGACAG GGGTGTAGTCCATCGACGTC CAAA TCAGGGGTGATAGTG GAAA GAATGGCTTGAGC  
GTC TAAA TG CAAA GGTAGGGGAGT TGAACAAGGATTC CGTGGAT GTTCTCATCATTATTGAGT TGGT GG  
ATGAGCGC TAAA ATGTC GGATAGTGTGGC ATCC GAGGGCTTGGGATA GGATTTA GACACC ATCC CCAAT  
CCGTAGCACGCTTGAT TTTCCATATTC ACATAGAT TTTCTGAGGCC GGAT TATTTCTATCAACACAACAGC  
AAGACCAGGAGC CAAA GAGCAGGCTC GGATAT TTTCCAAAATTGTTGC TAAA ATATGGTCAGCTGCTGGC  
GC ACCC TTTAATAACATGCACAAATACTTAGT TAAA TGG TTTTACATAGGTTG TTTA GAGG GAAA GAGTC  
TAGACCTCTCTTGATCAG TTTA CAAAAGCTGAT GAAT TTTTAAA ACTAGAAGACT GAAA GAGAAT CAGAT  
CTGAG GAGT GAAA GACTT TTTA TGAGCCAGAAGACTGAGAAGCGCCCCGTAAGGTAGATCC ACCATGAGA  
ACGTGTTG TAAA TCGGCAAGAAGGGCTGTGTTATATAGGCATAGAGGGCGATTGAA GAATGCTAGAACGG



GGTAAAGAGAGAAAATAGAACGTTAGGGAATAATAGAGCACTGATGAGAGGGAACGAGATCCAACGTTCTTT  
AATAAAGAATCCAAA TGTCAAAATACAGGATAAGAGAGGTGCTCACATACA GAAAAGCTTGGATGCCCAT  
AAGCAGGTGGAGCCCATATCACAAAGCAGACCCGAGAGCATAGCCCAAAGCAGCACGCGTTC TTTAGGTT  
GGGAATAGAAA GTAGTGACAATCAAAGGAGCAAAGTACACTGGTCGCC ATTCAGGAAA TAGCGAGG GAA  
TAAGA GAAA ACTGACCAAGAGACTAG GAGTAGAGTGGCTTGGGAGAG ATTC TCAAA GAATGT CAAA ATG  
AGCGTTGGGAAA GGAATATTGCGGAGAGGAATATAGGCCTCAATGGGT TAGTGT CAGCATCGCCGACTA  
TAAAAGATAAAAATGATTTACAGCAATATAGAGGGAT AACGGCAA GGAT TGTTAATAA TTTAATGTTCTTA  
TCAATTGT TTTA TGG TTTAT GAAA ACAA TTT TTTA TTTAAA ATTA GAATAGAT CAAAAATAAA TTAT  
TCTGG TTTCTGCTCAT GAAAAAAGAAGCAGTCGCAAGCTAGCTCAAGTGATTGGGCGTAAGACGG GAAA  
CTA TTTCCAGCTTCTATTGAAGGC GAAACCAA GAAA GAGCACAACATCATTACAGCACAGCCTCAAAA  
GAAA AAGAGTCTCTAC GAAAAAGAGC GAAA GAGTTCGATGTGCTAGTAC ATTC GTTATTAGATAAAA CACG  
TTCC TCAAA ATTC TGACCAAGT CAAA ATT TTTA CGTACCAGAAT GGC CAAA TGGAGACAGAC TTTCAATA  
TCAAA GCGGATATTC TGT GAAA CTGTAGTGGGGGA GAAA GATCAAA TAAAAAACTAATAAGTGGAT TAA  
CCC AAAATGAAA GACGGGGAGCCTGGGTGTATATATTGGTCTCAAAGACCGCCAGTAATAAAA GATCTC  
CAAAATC TTTATCACTGAGCGGTTAGGCATGAGT GCCTGCTTGGGGCTACAGAGATGCACTTTA TTGCAT  
CTACCCGCT TTTCT TTTCCGTCTAACCTATTT CAAA GTTTT TTTCCGCAAGGCCAGAGCCTTGCGTTTTT  
CAAA TCCAAATGTT TTTATTCCGATCT CAAAT TTTA TTTCAATAATTC ACTG TTTCCAG TTTAAA ATTATT  
ATT ACCATT CATTGGTTTT CAAA TTT TTTAGGAAAAAATCATGTCAA TTTTC TGGAAAGTGGTAATGTATCT  
CCTGCAACTCCTGAT CAAAACCCATCCATCTTGATGGGAAGACAGGCGGCATCAGCTCATGCAGCCAAAG  
AGGCCTCCGGAGC ATCCAAGGCTACG GAAA CGTCTGCTGCAGAACAACAAGCGTTAATTAGTTCTGGAAC  
GGAAGTAGACTATGTCACGGACAAA CAGCAAAGCGA GGGTAAA TACAAAAAG ACCCTCGATAAGACTTTCG  
AAA TCTCC TAAA ACAAAT TAAA AGG GAAT TTTTC CAAAGTACGTGCAGGTAC TAAA GGATTC CTACAG  
GACAAA GAACGCGAGCTTCTCGTAT TTTCTGCTCGTAAGGCAGAAAATAATGGAGAAGGGATGTCTATGAT  
CCCTAGCCAGATG GAATATGTGAAGAAA AAAGG GAATCGGG TTTCTCCTGAAA TGCAAATTT TTTA TCTT  
GGAGCTTCAGGAT TATGGAGTCCAACGTCTGATG TTTCTTC TAAA ACG GAAAATCG CAAAGGAGCTACTG  
CCCTGTCAACA ACCCTTTCATTGACGACTATGCAAG ATCCTGTGTCTATAGAGCATCTATCATCTGGAGA  
AATCACTGCATTAGCTTTCG TTTAATCC TAATGTTCTGTCAGCTTC CAAAAATGAGCAGACAATTAATGCT  
TGGACAGAAGCTAGGTTGGGAGGAGAAA TGG TTTCCACTCTCTTAG ACCCAATATTGAGACGTCTTCTC  
TTCTACGTGAGCTCCTACCCTAAGTAACGAAGGGATGGTCGATG TTTCCGGATATGG GAAA CCAGACTAC  
AAG TTTATCCATGGAA GGATTAG TAAA TACTGTTGTGATG ATCCAGCTTCTGCAGAAGAAGAAA AAAAG  
ACTGGAGAGCTCTC CAAA GAAGAGATGGCAGCCATGGCAAAAATGATGGCAGCGCTATTAAGCTCTGGTC  
AAG GGATGGCAGTT TTTATAGCTTCTTCC ACTCCTAGTT CAGGCTCAACACAA TTTCTGAACTAAGTT  
CTCAGGAAC TATCC CACATCATT TTTCTAAA AAGGAAGATAAC GAAA CCACAAA GGGATTGGATTC TCAG  
ATAGGAAGCATAGCG CAAA ATACACGGAGAGAAA ATAATGCGTCCC TTTACCGACAACAGCTTGACAG  
AGGAGGCTTCTTATAGGTTCCCTGTAGGAGAAGCTCC CAAAGATGTTAAT GAAA TCCCT CAAA CTGTTCA  
ACATAGTACGGTAT TTTCCAGAGGAGACTGC GAATACAGAACAAGCTCTT ATTCAGAATGAGAG CAAA GGA  
GAGATACCAG TTTCTGCTGAGGTAGTAGGACAAGATACGGTTAGTTCCGGCTTACCAG TTTCTCTCCATT  
TAG GGATGGCCGTGTTAGCCTCGGTTCTCT TTTCTACAGAGGAT TATAAGACTGCGGTAGAACATCG TAA  
AGGTCTGGAGGACCTCCAG ACCCATTTGAT TTTA TCAATACC GAAA TGTGGCTGTTG ATCCCGCCATTATT  
TTTCAATCACCGTCTCC ATTCAGTG TTTCTTCGCGTT TTTCCGTGCAAGGTAAGCCGGAAGCTGTAGCTG  
TATACAATGATGATCAAGAAGAAGCTGCAGGTG GAAA TCGAGATAGTGATGAAGG GAAA GACCAAGAGCA  
GGATAAA ACAGAGA GAAA CAGAGGATGCAGGCGGCGATT CATGA GAATAATCCCT CAAAATCC TTATGGAT  
CCATGGCT TTTCAAGCGATAGC GAAA GATCCTCAAGAGC GAAA GAATGGGAGCATATCAGA GAAA ATTC  
AGAAGAGATTGCTCGTAATGAAGC TTTACGCATGGC TTTATTGGCTATTGCCGATCAAGAAGA TAAAGAA  
AAAAACAAAAGCATCGGTTCAAAATCTTAACCAAAAAACAAACCAGGATGTTGCTTGGTCAGCTACGTC  
A TTTCCGATTGGAT TTTCAAAA ACTGCAAGCAG GAGTGTGCATC GAGTGGTCTTG GGATGATAAA TCCAA  
GCGCTCTAAGTCATTAGGATCTC GGATACCAGAAA ATCTAAGAAA ACGATCTGTATTAGCGCTGCTGCA  
GCACAAGCTATTGCTCATGCCGAGAGGCTTGGGTGATTGCCCGCAATGAAG GAATCTTGGAGATGACGT  
TGTCACT ATTC AACA TAAA GACAAC GAATAATCTTGCAATCCAATCAAGCAGCTTGT TTTT TTTCCGCTA  
GGAGGGAACGGAAT GAT TAAA GGATCTT TTTCTTT TTTCTCTTTGATCTGGG GAGT AATACAAAGCAC ACT  
CTCTTACTAATCC TTCCATATCGCTTGAT CAAA CAAACTGTT TTTCTGTCAGAT TTTCAATGACAAT  
CATGCTTCTGTATTAATAAGGAAGCC ATTC TCAAGCAATTGACAG ATCC TGTAATTAGCGTCTT TTTA  
TC GAAA ATGCCAAA TTTA TGATGTAGTTGGTACG GGGT TACCT TTTCA TAAA TAGAGAGACTA GGATGTT

CTAATTGCTTAA CAAA CTGTACGG TAAAGGACAAA TATCCAAA TCGACAAGGAT CACTACATCAACACC  
ACAGT CAAATGCGGCATTCAATTCAGCAATAATCTGAGG TAAA GTGAGAGCAAACATACCTACTT GGATG  
GATTC TTTCGCTGATC GAATATGGTGAAGAACTG TTTC TAGAGCAGCAGAACTC CCTCCATCAAAG GAAA  
AAT ACTCGATGAGT TGATTGTTAA TAAAGCACCAGCAGAGG CAAA CGT TTTAA TAAA ATGACAAA TTTC  
TGCGCTT TTTAATCC AATTATTAGGTTAGCGCTCTTCTCTAACGAAGCTAATG TAAA ATTAGCAGATCCG  
ATCC AAGC GAGT TCTCCATCTATTGCCATAGTTT CAAA ATGCAT GAGT TTTC TGTGCATGGGAGGAT GTT  
CTCCAAGGTAAGATAGGGGAGACTGAGAGA ACTC CGCATT TTTA GAGATACGTTGGTAAT GAAT ACATAC  
AGGAAT GCGAGCGGACACTTGT TTTCAA ACTTGTCTGATAGCGGGAGCAGATAGGTCA TAAA TACTG  
AGAAA AATATCTTTT CAAA CAGAGT CTATCGCATCACATAGTA CAAA CGTTACATTTGTCTCCACACTG CA  
AAGTGAAGATAACAGGTTCC TTTGGATTC AATAAGCG CAAA GAAGGTATCAGCAGATT GAGT CGGGGCTGG  
GGCT TTTAG TAAA ATCC TCCAACAAAAGG GAAA CTAAGCTGAACATTAT CAAAGAAA TAAGGTGT CAA  
ATTTT TTTCACAAA ATTGTG TTTA GCTCCTTGACACCTCGATAAGGTGCTGTT TTTA ATCTGCTCAT GAA  
TAGTTGTTACTAACATGATTT TTTA CGGCTA TTTA TTTC TTTA AT TAAA AACAAAACAAAAATCTAT  
TTTA CAATCTGTT TTTAAA CAAAAACAA TAAA AAAGGTTATTATGG GAAA TAGCTATGCCAGCGAGAAG  
AAA CAAGAT CAAA CGTTGCCTCATCAGCTTCGACTTCCTTAGGAT AAGGAGG TTTC ATGAGGGCATTCCAG  
GAT CATGGGGGGGGT GTA ACTC ACCTTGTGATTAGTGA CAAA ACTTACAGGGATGTG TAAA TCTGTTGCA  
GGAGAAGATCGTG TAAA TATTC TCCATA TAAA TTC TTTC G TACTAGAGAGACT GGATAGATCTTCCA  
C TAAA ATAACAAGAGGCCAATCTGC TAAA TGGGGGT CTTGAGT AGAGCGGGGAT ATCTAGCTGCTGTAG  
AGAAG TTTC TAAA AC TAAA CAACCTCTACAGAAA ACTC CTACAAAAGAT ATTC CAGGAAGAGAAGGCCCT  
CGATACCGTCT GGG TAAA GAGC GGAT GGGAGCTCCACGCC TAAAAAATACC CAAA GATCC TTTA TTGA  
ATCC GCTACCTGTATA ATCCAGGGTATC ATTC GCAGTCTCC GAAA GGATAAGAAGATCGCGGTCAA AAT  
CATGCGTTC TAAA ACGATTC TAACAAGCTAGAAA AGT TTTC TAAA TCTAC GGAT TGATCTGTAATCCAT  
AGAAA CAAATTAAGGAGAGT TGTCCCTCTCCAAGT ATTC GCAAAGCAGAGCGTAGAGCTTCTTCCAGT  
AACGTTCT TTTA ACTATAGCTGCAGCCAGAGCGTGA ACCCGGCTTCTCCATAGCTT TTTAGGTCCTGAAC  
TC CAGGCATGATCAGAGGGAAGAGAGGA GAAA GTAGTTCTTGAAGCTTA TTTC CCA GAAA AAATCTTCT  
TG GAAA GGT TTTC CTACAACAGTCG CAGGATAGATAGCATC TTTC TTATGATATAAGCAGTTGCA TTTAA  
AGATCGG GAAA TCATGTGT TAAA CTATAGTATCC GAAA TGATCTCC GAAAGGACCTTCTGGACGACGTT  
GCCTGCAACGGCCTCGCTGTAA GAATGAATTCAGAAT CACATAGCAGAGGGT GCCCTGACTGCGGATGC  
TTCTCTACAAAGCTAAGCTT TTTA TCAAATAAAA AAAGAACAAA TAAA AGCTCTGGAAC ATTC TCTGGAA  
GAGGGCAATAGCAGATA GGAT CAAAAAGGATTC CCAGATAGGAACACTGTGACAGGAAGAT CAAA TTT  
TT CAAA TTCAGCTTCAA GAAA TGGGCTCCACCACCTT CAAAAACAAAGAAA TGTAATCCCAAAGTCTCT  
TTA TCGAAGCGCTGCATACGATAC ATCC TAAA TTAGGGACGCC ATTC TCAGGAGATT GGGTGTACACCA  
AAGGAAGTGT TAAA AAGGGCCGCCATCTTCTGCCAGCTGGTAAGCATAGGAAGCTGGGAGAGATTAGG  
AGCATCTTGATAAAGAAA AGGGGAGGAGCG TAAA TGGCG TTTA CGC ATTC CTAATGCAGAGATTC CACGC  
TT GAAA AGAGAGCGGTGCTTCCACAAAGA GAAA AAGAAGGGGGAGAAGATAGTAAGT GAATAA CAAA TT  
CAAAAAGATCTGAAGAGAGATCTGGGAACAGTAGGTCAACACGTCTTC GAGT GCC GAATAAAA TTAGTGAG  
CACAGG GAAA GGGC ATCC CTTAACCTGAT GAAA AAGGAGGGCTGGTCCTTCTC TTTC TACAACACGACGA  
T GGA TTTC AGCGATCTCCAAATGG GGAT CTACAGGAACAT GAAT ATCAATGAGCTCATGTTGAGAGCGCA  
AATAATCCAC TAAA GATCGTAAG GAAA ACACGTCTAGTCCGCTT ATTC GAATA TAAA AATAGT TTTC CG  
AACTGCCCCAAAAGGCTATGTGTCAG GGAT AGATACACGCATGCTGAGG GAAA ATC TTTC TCAGCATGC  
ACATAGGAGAC TAAA AACC CAAA CT TTTAGCTCTAGCAACAACCTGATCTA ACCC TAG TTTA TCAACAAG  
GCG TAAA GCTGCTGCAGAAAT CAAA AG CAAA AGGAAGCGAT TTTC CTCAGTAGACCATAGTCTCTTAGTC  
ATCATATTAGGGAA GAATCGACGT CAAA TTCTTCTCTGTAAC TTTC AAACCG ATCC CTTT TTTC TT TTTAG  
AAA TCC CTC GGAT AGCATAGCTATAACCGCAGCAGGGC TTTC TTCTGTAAGCGCACATTT TTTC GACAT  
GACT TTTC CTATATTC ACTGGCCGCTATCTCTCGACAGGGCAACTGTAACAAAA GAAA CTATGTTAGACC  
TTTT TTTA ATATATCGGGAAGAAGT TTTC GT GAAA AAGTGGCAGAAA ATGTG TTTC AAAA TAAA AGT ACTC  
AAGGAAA CC TAAA ATAGAGCCTCAAG TAAAGAA TTTA GCTTAGAAT GAGAGGATAAAA TCTTCAATAGAAG  
GCTTA ACTCGATAC ACCCAATTATTT CAAAAA TAGTTCTCTGGCAGATTGATTC TTTC GTAGCGAGGAGT  
T CAAA ATATCAAATCC GGGAACAGAGCCAGATAGTCA TTAATAAGATTGATGC GAAA AATAGAAGAGGT C  
AAA TGAGAGAGT TTTC AGGATTTTC GGTATGATTGTGAAGAGATA GGGT GGAAGAATAGGG GAGT CC TAAA  
ACTGAGCAAATAG CAAA GATTCCTGAGGAGATTC TTTC CACCATGAGGCTAATGTAGAG GAAT CAT GAGT  
AGAGAGGCTTGTGAC GGATAGAGGGT CGTATTGATC GAAA GGGGT ATAGGCTCC ATTC CCTTCCAG TTT  
CGTTCCCAACGAG GAATTC TAGTGCCGCATACGGCAAAGACTC GAGCATACG TTTC ACATCGGAAGGGA

TCGTTCCAGATCTTCTCCTATAGGTAGCATAGATGAACTGGTCAAGAGGTGAGATAAGATATCTTGCCC  
TTGAGCTAGATAGTC TTTCGGAT CATGAGGTTCAAAGCGTCCGC ATCCAGACTCATCC CATACCCAAAAT  
CGAAA GAGACCGACGATATGATCAAGACGGTA TAAA GAG TAAA AATTC TCCGCATAACGTAAGCGTCCCT  
TCCACCAGAGGTAGTTATCTTGTGCAAAGT TTTC ATATTA TAAA TGGGGAGATGCCAGTTCTGACCTTC  
CGCATTATACAGGTCAGGAGGAGCACCTACAGATTC TGAAGAG GAAA AGTAATGCCTA TAAA ACCAGACA  
TCGCAGCTATC TTTA CTGATTA GAAT AG GGATATCC CC CAAA ATGAGACAGCT CAAA CAATTGGCATGCT  
CCCGCACTTGTGTCATCTGTTGGAAGCACAATACTGTAGATAA GAGT GAAA TTGTATATCTTCCGCAA  
AGTACGTTTCATGCTCGGTAATCTGGGAGAGATCTGTGTAGGTGGTTGGCCAATGATTAATAGGAAGGTTA  
TCCAAATGTTCTC GGAT AGAGC GAAA GAGAGCGTAG GGAT GTAACCAATATT TTTC CTGTTACAGAAGG  
CATAAA AATCA GGAT GATCAGT GAGT TT TTTC TG TTTA CACACGCGGTAGT ACTC TT GAAA AAAATCTCT  
CTTCATAGAGCGAACTT TTTC ATAATGTACTT GAGGAAGTTGAGA GAGT TGCTGCA TTTC TCGTATGCGT  
G TTTC CGCAGCTGGCACTTCTTC TTTA TAGGGGAGCGCAGAGATA GAAA GGTGAAG GGAT TGAGT GCTA  
TCGAA GAAA TGCTATTGTAAGG ACTC GAACAGG ACCC TGTATCGTTAATCGGAA GAA CAAA AAGG CAAA  
AAA ACCCACAGGATACACCAATCGATCATAG GAAT CAGGTCAA GAAA TTC ACCTATCCCACAAC TTTC T  
TGAGTATGGAGA GAAA ATAACGGTACGCATACGCCATGCTTAGGAGAAGTATCTATCTGATTC CAAATCT  
TTC GAAT GGAAGATTGCT GGAT GATACGTCGGGAT TGGGAT AATGACGGCATAA TTTA CAGGTGATACAT  
ACCTAGAGCATG TAAA TCTGGAAGTCTCCT CAAA AGATAGATTGC ATCC AGATATTGGCATGCTGC GAA  
AAAAGAACTAAGTAACGGGCGAGCT TTTC TCCAT TTA GATAGGTCATGTTAAGCCGATCACAGAGATAGA  
GT TGGTTAGAGAT TTTC ACCGTATCC TAGAGT GCC TTTA ATATTAGATTGCGGAG ATCC ATTGATAGACAA  
AGCAGC CAAAAAA AATTT CAAATC TAAA GGTATTC TCTGGAAGT TTTC CAAGCATG ACTCCAGCAAC TAAA  
AATCC TGAAT TACCATCC TCTTCAA CAAA TACAGCAACATTGTTGT ATCC AAAGCGAACTATACAGGCAT  
TATTG GAAT CAG GAGT AAGAGGGCTGTTGA CAAA AGT CCCTAATTC AGTAAG GAGT TGTTC AAAATGAT C  
AAA CATAAA GGAAGCGCGCTCTT TTTA TTACAGTT TTTA CAAGTTA GGGT GATGGAGGCTGTGTTGAGGT  
AGGTGACGTTG GAAT CTCAGATTGAGGTACTGGAGCATGAGGAGGCGTACTAGAGAAGGAAGATCGTGGG  
AAGTCACCTGG TTTA GGATAATCC TCATT ATCC GCA TTTA TCGCATCTAGCGTA CAAA TGATAACCGATG  
CCAGCTGCTGTTTTT TTTC AGCTCCAGAAATATTC TAGGCGAACAGCCATTAAGAGCGCGGAA GAAT AA  
G TTTA AA ACTTCAG CAAA AGGACCAGTATCTGGCC TACCAGTTC A TTTA ATGCCT CAAA AGC CAAA GAA  
GAGGAAGG GAAT TTA TCTTCTACTAATTGTAAGAAGGT TTTA GT TAAATTTCTGTCTGTTAAGGAT GGAA  
TAGGGGCATGTCCTTCATGCT TTTA AGCTAT TTTC CAAGTTCCCAATA TTTC TATCAAAAAGCTATCTAC  
AGAGT GTAAGGCTTGAGATTGCTTAGTTC CGTCATATATACTTGCAAT CAAA CAGGAG GAAT GGAAGGG  
CCCTCCGAT TTTA AA TCTGCTACCATGCC ATTC ACTA GAAACTC CATAACAGCGGT TTTC TCTGATGGCG  
AGT AAGAAGCAAGCA CAAA ATG TAAA TTAGCGCAATTAGAGGG GGAT GAGGTTACTTG GAAA TATAAGGA  
GCGAAGCGATGAAGGAGATGTACAAA CTCTGGAAGCAAAGG TTTC TGAAGCTAACAGAACATTGCGTCCCT  
CCAACAATCGCCTGA GGATTC TGGCTCATCAGTTGATGC CAAA CCT GAAT GAGAGCGGACTTAAG TTTC C  
CATCAGAGGGAGCTA CAAA AAT TAGATAATCAAGAGCTAGATCC TTTA ATTGTG GGAT CAGAAA TTACT  
TGTGAGCGCATCGA GAAT TTC GTCAGAAGAA GAAT CATCATCGAAC GAAT TTTC AATCCTC GAAA ATCT  
TCTCCAGAGACTTCG GAAA GATCTCTGT GAAA CGATCTCAAGAG GAGTATCGCCTT TTTC CTCTGTGC  
TCTC GGAT TTTC TTTC TGC TTTA TCC GCTGTTGG CAAA CGACGAGCTTCTAATGATTC AAAC TCTCTTC  
TTTTTT CAAA ATT CGGGT TGCAGCTGCAGGAT TTA TGAG ATCC TCAC ATTC CAAA AGCATACTTGCC TCA  
GAAGCTTCTGAGAGCCGATAACCTCTTGTGCATCTT GAGTAGCTGCAGCAGCTTGTGCTCGCGCAACGT  
CTACTG CAAAGGT GCTGCCTAGCCCTCCAGCTCCTCCTGATGCAGTCATCTCTCTCACCTCACGGTTAG  
AAA CAAA AATTC TTCCCAAAGGCT GGATTC TAA TTTC AGG TAAA ACTTCTTGGTAA GAAATCACAGCGA  
TATCAGG GAATTC TGTCTCTATCAA TTTC CGTACATAGCGTCTGACATCAATTGCTGTCAACAGCACAGG  
AGGCTGTCCTCCAGGAGGTGTAG GAGT AATAGTC ATCC GCATAGAT TTTA AGATGAGG TTTA CAGAAT CT  
GGAT C TAAA GCCAAATAAG ATCC TGCAGAAG CAAA CAAA ATTGCTCCGC GGAT CATCTCTTCAA TTTCAG  
GAT CGAGCAGATATACA GAAA TAGC GGAT TGCCCTTGAGAGAACTTGAAGCTGATATA GAG TTTC AAGGA  
AGAGCGCACATATTC AGTAAGTAATACTGTATCTT TTTC CGTCTGTGCC ATTC GCTCAAAGATTC CAAA  
ATAGTTCG TAAA TCC TTAATGGATA CAAA TTCTTGAAC TAAA CGCT TAAA GATTTCTGTAAGCTTCTGTA  
GAG GAAT AAGAC GGGT AACCTC TTTA ACAAGATCAGGGAAGGAACGTTCCA TAAA TTC AATCATAGAGCG  
TACTTCCT GAAT GCCTAAGAACTC TTGA GAAT TTC TATGGAAGAAGTAGGACAAGTGAA GAAT AATCACT  
TCCAAAGGAGACCAGTA TTTA ATCGCAGC TTTC TCTAAGATAGTGAGAGCATCTGTACTAACC CAAAGTGG  
AAGGCA ATCC TGCAGCATT CAAA TAAGTAATAAA AGGTAAGTTATACCGAGATAAGT TTTC TTCTACTTC  
ACAAA TTAACACATGA CAAAGTG GAAT TTTC CGCGAACGTAGGGAACCTC ATTC AGCAGAAT CATATAG

TCATTACCTTCCAAGGAAGGGGAGTCTGTACGTACATGGATTCCTGGATAACGAATTC CAATATCC TGAT  
AGAGAGCCTGACGCATTTTAGGAATCATATCATCCACAAAACCAAA CCCCAGCAAAGTTTCGTTGTTGGAT  
GAGTTTAGAAA GATCTTTTCCAAGTTCAAGAATTACAGGAAGAGT CAGAGCATAATCATCAGAATTTTCT  
CCTGAAGCCGCAGCTCCATCAGCGGCACCTACTGTAGTAGTAGAGCTGGCTCCGCCTTTTTT CCTGGAG  
AGT TTTTCTTAGTGATTAACGAATACCTAATACTGCAAAGAGAACGGCCAT TAAA GCAAATGACCA TAA  
AGGGAAA CC CAAA AA GAATCCGATTCCTAAGGTTGCGCCTGC GGATAGGAGAAGTGCCCGAGGTTC TTTA  
ACCAACTGGCTA GAAATTTTCTTACCAAGGTTAGTGTC TTTA TCCTAGATA ACTCGAGTGGTTACGATAC  
CAGCTGT TAAA GAGATTAACAGAGAGG GGACAAA A GAAA CTAACCC ATCACCAGATCGTAATCAACGTGTA  
GATGTGCGCGGCTTGAGCCATCGTCATGCCCTTCATGGTCACTC CGATGACTAATCC TCCTACGATGTTA  
ATCAAGGAGATAACAATCCCTGCGATCACGTCTCCCTTAATGAACTTCATGGCTCCGTCCATAGCTCCA T  
AAA GTTAC TTTCTTTCT GAATCTGAGATCGTTATCACGAGCTTGTGTGCGATCAATC ATTC CTGCTCG  
TAGGTCGGCATCGATGGCCATCTG TTTA CCAGGCATGGCATCTAATCG GAATCGAGCAGCTACCTCAGCG  
ACCC TCTCCGCACCT CAAA ATTACCACGA TAAA CT GAATGATGGTGATGATTAGGAAGATAA TAAA TCCAA  
CGACATAG TTTTCTCCAACGACGAAGTCTCCGAAGGCTT GGATCACGTGACCAGCATAAGCATGAAGGAG  
AACAAA TCGGGAGGAA GAAATGTTAATCCCAATCGGAACATTGTGGTGATTAA GAGTAAGGAGGG GAAA  
ACAGAAA GTTGTAATGCGCTGG GAATATACAAGGCAACCATCAGCAGGAACACAGAGATCGCCAAGTTAA  
TGGTGATCA TAAA GTCCACCATAGCTGGAGGCAATGGCAAAATGATCATCAAGACCAGCCTAAC ATCCA  
CATGGCGAGGATCAGGTCCTGGACTTG TTTA TCATATTCAGGGCCGCATCTCCCC GAATGTTCTACTG  
ACAAA GTT GAGTAGCTTGTTTATTACAGATTATC GAATTTGGTTAATGTT TTTA TTC TCAAGGT CAAA CGC  
ATTAAGAGAAGTGATATAGAGAA GGA TTTTCCCAACAGCTTCATATGTGGTCTCTG GAATAAACTTCAAC  
TCT TTTTCTTTCATCTAGCAGCTGGTGTGCTAAGGGAAC ATTC CGCATGATAGGAATCCATATTTCTCAG  
CTTCCGCAATAATCC TT CAAA CTCTTAAG TTTA CCCCATAGCTATG ATCCATGGAGC CAAA TATT TTTT  
AGGCATGTAGCCAATCGCTACAGCGATGTC TTTA GGGTTAGATACAACGGCGCTAGCATGCTTGA CAAAA  
GAGGACGT ATCC TCGTAAGCGATCTCTTGAGCAA CAAA ACGTGTCGCCCTTTA TTTT CAGGG TTTTCTT  
CTGTATC CAAAAATTC TTG TTTTACCTCAAATTT TTTT CATCTT GAGT TCCTTAGC GAAACTGTGACGCTG  
ATACACGAGGTCTATCACTGCAACCACAAG GAAA AATAGGCCAATAGAAGTAACCGC TTTA TATA GAATC  
TC TTTA AA CACTTGAGCTGTAACCAGAGGAGGAATCCTG CAG TTTT C AATAACAAGTTCTACACGATTTT  
TTA GAACAATGTAGAGGAT TAAA GCAGCTCCT GAAA TCT TAAA AATAGACTTCAGTA ACTCAAT GAAAGT  
CTTTA C CAAAAT TCAAATTT CAGGTTGTCAATGGAT TGAATTTCTTTA AATCC GG CAAAAA ACTTCT  
GTAGAGAAGGTAGGACCAACAATTA GAATCC TATCAACAATCC TAC GAATCC CACCGCTCCTAACAAAG  
GAAGAGAGACTGTCA GAATCAGAAT AAGGCAATTT TTTA AA TAATAGATGGCTAAGTGC GGATCATGATT  
CTGGGGAGCTGT TTTA AA AATAGATAC TAAA AAGCTTCTTAAGTGTTCAGCAAAAAATGAAGCCAA GAA  
AACGTTAAGAACATGGAGACAATGAACGTAATCGCAGAAG GAAA ATCTTGAGA CAAA GCTACCTGCCCT  
TT TTTT TAGCGTCCCGAAGACGCTTGG GGGT CGCCT TTTT CTGTTT TTTT CCCCATAGATGGCCAGTTGCT  
TAAGCGCTATAAG GAAT ACTTCGCAAGTTACCGTATA TAAA TGT TTTTCTCAAG GAAA GAAGTGGCAGAT  
GCTC ATCC CATT TATAAA CAAA GAGT AAGGGT TGTGTAGAGAACA GAATATTTTT TTTA AA GAGCGTTT  
TT CATGAAGCACTAATCTTGCTT TTTCTTTAGAA TTTCTTTTCTTAATAA TAAA AAGGCTGTGTTAGC  
CTTAA GAAA AAGCTGTACA ACTTCTTAGGTAAT GAAA ATGGGACAAACAGAGT GCG GAATAGTAGGTCTT  
CCTAATGTAGG GAAA TCAGGATTA TTTA ATGCGTTGACAGGCGCACAAAGTTGCCTCCTGTAATT ATCC CT  
TCTGCACAATAG ATCC TAATGTGCGTATTGTGCCTGTTATCG ATCC AAGGTTAGAGACCTTAGCACGTAT  
TAGTCAGAGCCAAAAGATTATCTATGCAGATATGAAG CAAA TAGACATCGCAGGAT TAG TAAA AGGAGCA  
GCTAGCGGTGCTGGCTTAGG GAAT CGTTT TTTA TCACAT ATTC GAGAG ACTC ACGCTATTGCGCATGTTG  
TTCGTTGCTTCGACAATGATGATATA ACCCATGTATCTGG GAAA ATTG ATCC TGAAGAAGATATAGCTGT  
GATTAATCTAGAGCTCGTATTAGCAGACT TTTT TCTGCCACTAGCGTGCAGAGA GAAA CTTG GAAA ACAG  
GCT TAAA GG GAAAAAAGATATTGGGCAGTTGCTACCTCTATTAGATCGCGTAGTTGATCATTTA GAAT CAG  
GAAA FCC TGTTCGA ACCCTCTCGC TTTCTTTA GAG GAAA AAGT TTTA ATT GAAA CCGT ATCC TTTT CTCAC  
AGGAAA GCCTATGCTCTATATTGC GAAT ATTGATGAAGACTCTTTA AC GGATCTGGATA ACCCTATGTC  
CAGAAA GTACGGGAGATCGC TAAA AGAGAAGAGGC GAATGTAGTTCCTATCTGTG TAAA ATTAGAGGAA G  
AAA TTC TATCGCTCCCTCTAGAGGAACGACAAGATTT TTTA CATAGCTTAGGTCTACAA GAGTCT GGATT  
GAATCG TTTA GTAGCTT CAGCATACCAC ACTCTT GGGT TAA TTTT TTA TTTT ACTACAGGACCACAAGAG  
ACTC GAGCTTGACAA TTTTCTAAA GGGTTACAGCGGCAGAGGCTGCAGGG GAAA TTCATTCCGGATATTC  
AAAGAG GAATTTA TTC GCGCTGAAGTTGTA ACTATGGA GGAT ATTGTTGCTTACGATGGAAGAGCTGGAGC  
GCGAGAAGCCGG GAAA CTACGTGCTGAAGGTAGGACTATATTGTTCA GGATGG GGATATTATGCTCTT C

AAA CATAAT TAAA GGAGC ATTC ATCTATT TTTA TTGAGACGGGCTTGGC GGAT ATCTTCTT GAAT GGCAA  
GGACAAGCTCGTC TTTA GAAGAAA AGAGCT TTTT TCCCTGAGAAA TTGCTCAA GAAT CACAGTAAT ACT  
CTTATCGTAGAGATCTTCT GAAA AATCAA GGAT ATGTGCCTCTAGGCATAGTTGGTGTC CAAA CATTGTG  
GGCGCCATACC TAAA TTC ATAAACACCTGCATAGCTGA ACCC TTCAATAACGATAGTACAAGTATAT ACCC  
C TAAA GGAAGTAGA GAATGGGT AAGGGGAAGATTGATTGTTGCAT ATCCAAAAGATGTCCCG ATTC CTCG  
TCCATGAGCAACC TTTT CTGTATAAGCAAAGGTCCTCCAA GAAA CT TTTT TGCAGAGCACAATC TTTT  
TCTCTAA GAAA TTGTC GAAT TTTT TGCTAGATACAATAGTGCTTCAATCTGTAGGGGAGGGACTTCTT  
CTAGAGAT ATCC TAAA GAGGCAGCAAAGGCCTTAACG CAAA TGCTGTTCC TAAA CC ACCC TTCCCAAG  
TCTA GAAT CGTAACCTAAGACA ATTC TTGAT GGAT GTA GAGT CTTG TAAATAGACT GGATAAA TAGCTCT  
GCCTCTTGATTAGCTA TTTT CTGGT TAAA AAGGGAGAACGGCTAGATAATCAATGCCGCAGCCAGCTAGAA  
GCT GAAT ACGCTCCTCAAGAGAGGTAATAG TTTT TGAGGAGAGT TAGACAAAAGTATGCTCAGGAT GCTG  
GCTGAACGTAATT ACTC CAGA CAAA CCAG GAAA CTTCGT TAAAAA GAAAGCAAAGCTTGGTGTCC TAAA  
TGAC ACCCATC GAAA AAACCTATAGTAACAGATTC TATA GGAT TAGAGGACGGGAGCAGGCTGTAGAATA  
AGTCCA CAAACATCAG TAAA TAAGGAGATACATTGA ACTCGGGT TCGTC TAAA AGATTC CCATCAATAC  
ACTGATCGATAGAGAAGCTTCCACTACGCAACCGTCG GAGT TCTTC TAAA TAAGCTCCGC ATCC CAACAT  
ATTGCC TA ACTC ATGAGCGATACTGC GGAT GTATGTTCC CAAA CTGCATTGAACTACAAAATGTAGACGA  
GGGTATTC GTAT TTTA ACCAAACGAAGA TTTA CCGTTACTGTGGCAAACGTCGTTCTATAGATA ACCCCT  
GCCTAGCAT ATTC GTATAATTTT TTTT CTTGTAC TTTCCAAA CAGAGAACATAGGAGGGACTTGT GAAT  
TTTCCCTT GAAA ATAGCTTGTGCAAGTCAAGACTTCGTCCATAGTTGGAACTTT TTTA GATCGCCCAACA  
AT TTTT CCATCGCAATCGTAAGT ATCC GTCGTGGTTCC TAAA TGCGCTACCCTGCAT ACTC CAAA TCTT  
CAAACAGCATGATGTCGATAGTC GGGTGAAT TTTT TCCCTATTAGCATAACCATAACGCCTGTAGCAA  
AGGATC TAAA GTCCCTGCATGGCCAATTTT TTTT ACACCTATTAACCTAACAAGAGAAC GAAT AAGAC TA  
AAAGAAGTCTCCCTTGTGG CAAA TCTACCAGCAAACGCCTTCAATAG ATTC TGTCGCAAGTTCATAA  
TATTGATAGTGGAGTTCAGAAGGAT TGCTTT CAAA TTAT GGGT TAGTTTTTTT TTTA TCTTGTTCGGCTATTT  
TC AAGAGAAGAC TTTT TATATGGTCTTGAGGAGAGAAA ATATCTTCCACATAGAAA TTTCAAATCCGG GAA  
ATATTTA AGA ACTAAGTCT TTTA GAAGCCT GAAA AGCAATAAA ACC TGCCGAAGCT TTTAATGCCGCAAGA  
GTTTCTTCTTGG GAATTC TCATGCGCATAAT GGAT ACGTAAA CACAAGCCGACTGTAGGTCTCTCGACA  
AAGAT ACTC GTGTTATTGTGATCC AGCGATTCGAAA TC CAAAGGT GCTT CAC ATCC TTCAAATGACT CA  
AA CAATAGCTTCTCGAAGCATTGC ATTC ACT TTTT TTC ATTC TCTAT TTTT AGCCATATTAGCTTACAAT  
G CAAA TGGGTGAT TAAA TGACCTCATAGCACTGTAATATATACCAACTTGTGCTTGCTGATAATTATCTA  
ACAGAAT ACCGC ACTC ATTC CTTT TTTT ACCTCCTT CACATCC TC TTTA AGGCGT TTTA AGGAAGACAG  
AG ACCC TTTT CATAGAACCTC TTTA TCCGGAT AATAC GGAT TTTT TGATTACGTACCACGGTTCCTTCT  
GTA ACTAGGCAGCCG TAAA TTGT ACCCAATTGAGAAGACT TAAA GGTCGCTTTA TTTTCTGCAGC ACCCA  
AGTT TTTT TCTTCTGCTATAGGAT CTAATAGACCTGT CATGATCTC CAAA ATAGCGTCTACAGCATGATA  
GATGATGTC GAAT AGACAAAC TTTA AC ATTC AAGTTCTTGATTAATGGTTCTGCATGGC TTTT TACGCTT  
GTGTG GAAA CCAATGACAGTGGC TTTA GATGCCGATGC TAAA C GAAT ATCTG ATTC G GAAA ATCTCCAA  
CTC CGTAGATAAGA TTTT GACATCTACCTTCTCAGAGC GGATATTC AATATA GAGT GCGC TAAA GCTTC  
AATAGAACCTTGAACATCTGC CAAA ATAATCAG TTTT CAAAGT TTTT TTGTTCTGTAATACAGCGTCAAAG  
CAAA GTCGTTT TTTT TGCAAAGCTGCAGATC CAAA TTGGCCAGCAAGTCGGGCGTAATAATCTC TTTT CG  
CGACCTTCTCATTT TTTA CAACTA TAAA AGGAT CTCCAGC TTTA GGGATTGC GGAT AATCC TGTGATCAG  
AACAG GGGT AGAAGGTGTTGCCGACTGTAGGAGCTGGTTATGCTCATCATGCATTGTCTTGACCTTCCCA  
TAGCAATCGT TAAA TACTAACGCTTCTCCTAGATGCAAGGTTCCAT CAAA AACGAGCACGGTAGCTACAG  
CTCCTA ATCC TTTA TGCA ACTCGGATTC AATAACCAGTCTCGCGCTTAGCAGAA GGATCGGC TTTT CAA  
TTT CAGA ACTTCGGCTTG TAAA GCCAACA TTTT AAGCAAGTCTTGCA ACCC TTCGCCAGT TTTA GCAGAA  
GTATTAATAGTAGCAATCG ATCC GCCCCACGCTCAGGAAGAAGATCTA ATTC TGCTAACTGACGGTACA  
CTG TTTT TACATTGAAGTTCGGCTTATCACA TTTA TTAATAGCGACTACAATCGTAATGTTAGCTCC TTT  
AGCATGCTCGATAGCTTCAATGG CAAA TTC CAAA AT ACCC TCGTCTCCAGCAACTACCAAGACTACGATA  
TCGCAAACCTCTGCTCCTTAGCTCTCATAGCAGAGAAGGCTTCGTGGCCTG GGGT GTCGAGAACAGTAA  
TTT ACCAACAG GAGT TGTA CA CAAA AAGGCTCCTGTATGCT GGGT AATTGCTCCAGCTTCTGAGGCTGC  
CATATTGC CAAA TCTTAGTGCATCAATAATCGTTGTCTTACCATGATCGACGTG ACCC A TAAA AGCTACG  
ATAGGGGAGCGAAT AATAAGTT TTTT TGATCTGTGCGATTGACTTCGTCTCGAACTGTGTTCTCTACTA  
GACACAGCTTCTCT CAAA CTGAA GAAT CAAT TTTT AATCGTAC ATCC CAATTC TAAA CCGATGTATTC CAC  
AACCG CAAA GCTATCTAAGACATC ATTC ACTACGTAGGT CATGCCAT GAATAAA GAGCTTCT GAAT AAGT

TCTGAAGCTTTTAGCTTCAATTCAGCAGCAAGATCTTTTACAGTGATCGGAAGAGCAATCTTAATGTGTG  
CTGGGCATTGAACAACGTGTTCTTCCGCTTGCTTTTCGTCAAA TGAACACGTTTC TTGCGCCA TTTATC  
TTCTTCAGAAGAACCCTTCA TTTAATCCATAGCGATCGCGTCTCTG TAAA CGCCTTAACGCTCTCATCAGAT  
CTTTTAGATCGATCTCGTTCAGATCC GCGCTTCGCGTTGTTATTATTGTTGCTCGTTG ACTCTCTGCGAT  
AAGAAGGCGCAGAGGAGGCTGGGCGAGAGCTTGTCCAGAAGGTGTTG TTTA TTGTTATGGGAAGCAGC  
ATCATCAAA TCGAGGCTGTTGTT GAGTAGTCTCTCAGTTGATGCCG TTTTCGTTTC CTTAGCTGGAGCC  
AAA AACGTCTTAGCCAAGAGATGATTGATGTG TTTTCCTGTAGGCCCAAACCTTAGGCTTGATA GAAA CAA  
CGCTCTTAGGCTCTGTTCTTGTCTAATAATAG GAGTTTC TTCAATACGCTCCG GAGTCTCTGGAGAAGT  
CTCTTCTGAAGACTCTTTCTTTTC TTCTTGTGGACCGAAGAAGTGTCTGTGC ACTCTCTTAGGGCAAAT  
TCTTCAAAAGT AACAGAAGTAA TTTTC TGGAGCC TTTA TTGCAG GGATGGCATC TAAA GT TAAA TCGGATG  
CATCTCCTGGCAGAGCCGTTGTTACGGTCCGTTCTGCAGCAAATGAAGAGCGATCT CAAACGC GAATTCCT  
TCGCGCAGTAGATTC TGTGCGCCCAA ATCCACTTCAGGCGCAGGAGCAGGTGTGCCAGCAGT TTTCTTA  
GAGCTCT TTTCTTTAG CAAAAGC TTTA CTTGCTGGAG AATT CAAA GTGTCAGAAG ATCCGGCTTGAGCTA  
G TTTTC TGTTCAG TTTA TCTAAGCCAGCAGCCTTCGTTAACTGTGCGTTCTTAATCTTCAACTTGAGGTT  
TTTC GTCAAC CAAA CTTCTCCATA CAAA CTGACCTGTTCAA GAAT CTTATAAGCTAGCTC TAAA CTAAT  
TCCTGGAACAGAAGCCA ATTCGCTAGCACTAGCCAGCAATAT TTTTC CTAATCGTGTCTG ATCC TGCCTGC  
TCTAGGTTCTGCACTATCAGCGTATTA ATCCCTTCAACTTCTAATGGCTGATCTAATCGAGGGTCTTCGA  
ACTCTGCCAATTGCAAACGTT GAATCTCCAACAAC TTGTTGT ATTC ACTCATTCC CAAA GACTTCAAGTTC  
ATAGCC TAAAATCTGACTGATTAGGCGAGCATTGATACCTCG TTTA CCAATAACGGTTGCGTAGTCC GAA  
TCTTGACAATAATAGCGATAAC CAAA TCGTCTTC TAAAATAGCGATCT CAAA AATCTCTACAGGATAGA  
GCAAAT CAAA TAACAATTC TGTGATACAGGGGAAT AA TTTA CAACGTCTAT TTTTC TCGTCATTCAATTC  
CC GAATGATATT CAAA ATGCGAG ATCC TCGCATTCTTACAAAAGCTCCTACAGCATCTG CAAA AGGTTCG  
GAAGAGCGTACAGCCATT CAAA TCGAT ATCC TGCCTCTCTTGAAT TTTA ACAA TTTTC GACAGACCCTT  
CTTCTAGCTCAGGAACCTTCTGAACAAATAACTGCTTAAACAA ATTCAGGGTGGCTTCTGCTGAGAAT TAC  
TTCAGCTCCACCAT TTTTCAGATTC CTGTACTTCG TAAA GAAGCGCA TAAATCTTATC ACCC ACTTATGT  
TTTTC AGT CAAAGGATAAAAAGCGAGCAGGAAGTAGTCTTCCACT TTTCCCAAGTCAACAAC TAAA TTGG  
CTCCGCGAGCGAAA CT TTTA ACC ACTCCGAAA TGA TTTTC ATTT TTTTC GGTGTCTGGT ATTC TTCA TAAA  
TACGCTCTCTCAGCATGACGAAGCT CAAA CCCGATAA CAAA GCGTGCAGCATGTGCAGCAATCC TTCCA  
AACTGATCAGAGAT TAAA AGGAAC ATCC ATATACTGCCGCA CAAA ACAATCTGGAT CGT ATTCACGGCCCT  
TATC TAAA GGAAT TTTCTTACTTGGAT CAAAGCATT TTTTC GACGA CAAATT TTTTC AAAAAA ACTTCTAT  
ATCGCCGGTGCAGGAT TGATACTTACGGACACA CAAA CATCGTCTCTAAGAGTCTT TTTTC GCAGCAAT T  
TTTCAGAGCAGATTC AATAGCACCTACTATCGTAGCGTTGAAT ACC TTTTC TCTC TTTCCATGTAGTCAA  
AAATAGCCACAAG ATCC TTGTTCAATTAAT ACTCCTCTTATGGGT AAGG GAAA AAAAGCAAAAAAATAAT  
GCTAACGGGACAGGCCCTAGAGCTCTGCTCTTATG CAAA CTCTTCACTAACGAAGATTATTAG TAAA GA  
GATTAGTCTCTGTCAGAAG ATTC TTCTTCCGATCGTGACCAGCATCTCCCCATGAGCAAGGA ACTCTT  
TAATA GAAA GAGAAA CTTTC TTGTGATCT GGGTCTAGCTTGATAAC TTTAGCA GAAA CAAA TCTCCAAT  
AGAGAGAATCTTCAAT TTTA GCAAAGG TTTCTCT GAAAGCTC GGATACAT GGAT CAGTCTTCGATA  
CCAT CAAA CAACTC AAC GAAA GCTCCAAAAGCCGTAAT TTTA GTTACTACGCCAGAGATATCACTTCCGA  
CAGGGAACATAGCTTCAATCTC ATCC CATGGAT TAGGAGT TAATTG TTTTCACGCCAAAGTGATTTT CAA  
ACTTTCCAAATCTACAGACAGAAT AACTGCTTCGACGGTATTACCTTT CAAA AAGAGCTCTGAA GGATGG  
GAAA CTTT TTTA ATCC AACTCATGTCAGAGATAT GGATCAAACCTTCG ATTCCTGGCTCCA ACTCAACGA  
ACGCTCCGTAG CAAA TCAGATT TTTA ATTTCTGCTGTTACGCGGAGGCCGATA GGATATTTTTC TTCAAT  
GTT ATCC CAAGGAT TGTGT CAAACAAACAAAAGACCGAGAGAGATT TTTCTTTCATCTT CAAA GATAGAA  
AGAACA ACTACTTCGACTTCATCACC TTTATTGACCACTTCATTAG GGATCTACAATGTTCTTA ACCCAAG  
ACATCTCT GAAA CGT GAATAAGGCCTTCAATTC CTTCTTCGAT TTTCAA TAAA TGCTCCATAAGGAAG GAG  
TTTACAATTTTTC CGCGAACACGT TTTCTGGAGGAT ATTTCTTCTCAATATCTTCCAA GGAT TATGC  
TCTT CAAACAAA AGGCCAAGAGCTACGCGACCTT TTTCTTTA TCAACGCTAA GGATGATGACTTCCAATT  
CTTGGTT GAGT TCAACCA TTTTC GGATGGGTGAC GAAT GCG TTTTC CATGTCATGTCGTGAATGTG GAGTAG  
GCCGTCAATGCCATCAAG ATCC AAGAATACTC CAAA TCTGTGAT ATTC TTAACGATACC CAAA CGACGT  
TCACCGATAGTGA CAAA CTGATCAACTCTGC TTTCTTAGAAA TCGGTT CAGCTTCGAGAAGTCTCTTC  
TAGATAACAACGTTCCGACG ATCCACGTTGAT CAAA GAAT CAAA ACTCACAAACCTTGCTACGTA  
ATCATCTAAGTTCTTGATCTTCTTATTGTCTA CAAA GGATCCTGGAAGGAAGGCTTCCATACCAATATCT  
ACGATCAAACC ACCCTTAACT TTTTCGGGTAA CAAA TCCCTTAAACAATAGAACCTTCTCGCAGTGAGCAA

GAATGTATCCCATTTGTCGTTGTCTTGTGCTTTTTCCTCTGGATAAAAACAACCTTTTCCTTCGTCATCTTC  
AGCAAA GTCTAGG TAAA CTTGACTTCGGCTCCGACAGT TAAA CCTTCTGAA GAGTCGATAAA CTCAGAC  
ATAG GAATAACTC CCTCAGAT TTTA AGCCGACATCTACAACAACAAAGTC CAAA CTTATGTCAACAACCTG  
TACCT TTTAGGAT CGCACCAGGAT GTACTTCGCTAGT GGGT TCTTCTTCTGTGCGGTGAAGCCATGTAT  
CGCGTAGAGAAGGTC TTTAAA TTG TTTAACGTCTTCTGGTAAGCAAGCTATCGTATCGAGATTC TTT CAA  
ACTCCCAAGTATAATCAGCTTGT CAAA GCAT TTTA ATGATGTTCTCC TAAAA AACTACAAAGTCAAAA GA  
GTAGTG TAAATATTC ACCT TAAA AAAGGCAAGAT TTT CCTTGCACTACAAGTAATAAGATGCATCTC TTT  
AT TAAA AAAAG TTT ACTAG TTT TGTGTAAT TTTAGT TTTA GAT CAAATGTGTC GAAA CATTATAAAA TA  
TTCCATC TAAA CATCC CCATG GAAA GGACTGTCAATCC TTGAGAT TTTCAAGGAT ATCGGAGGG GGATGA  
ATGTGCG CAAACG GAAA AAGTC GGGT TGGTTATAGTTCCTTTT CAAATAAAAGCCGGGAACCTT TTTCTG  
TGTA TTTAAAGCTCT TTTATCTAAGTTCATATTGG GGGT TCTCATGACACATGCAAAGTTAGTCATTATA  
GGCTCCGGGCTGCAGGTTACACAGCTGCTATCTATGCTTCTAGAGCACT CAAA ACTC CAGTGCT TTTCTG  
AGGG TTTCT TTTCT TGGCATTGCTGGAGGGCAGCTAATGACTACAACAGAAGTG GAAA A TTTCCAGG TTT  
CCAGAGG GAGT GTTGGGGCACCAGTTGAT GGAT CTTAT GAAA ACTC AAGCGCAACG TTTCCGGTACGCAA  
GTGC TTTCTAAGGACATCACCGCTGTTGAT TTTA GTGTCAGACCC CAAATTCT TAAA TCTGGAGAGGAGA  
CG TTTA CCTGTGATGCTTGTATTATAGCTACTGGAGCATCAGCAAAGCG TTTA TCTATCCCTGGGGCAGG  
AGATAAT GAGT CAAA GCAAAGGGCGTAACAGCTTGCCTG CAAA TGACGGAGCCTCTCCCAT TTTCTGT  
GACAAA GA CAAACAAA TTGTAGGAGGAGGAG ACTC CGC TTTA GAAGAAGCCATGTT CAAA ACTC GCATG  
G TAAA CGTGTACAAA TGGTTCATAGGAGAGATACATTGCGAGCTTCTAAGGTTATGGT GAAT TAAA GCTCA  
GGC GAAT GAAA AAATCTT TTTCT CAAA GAAT AGTGAGATTGTCAAGA TTTCT TGGAGATACTCTAGTTCGT  
TCTATCGACATCTATAATAATGT GGATAAGACCACCACAACCATGGAAGCTGCTG GAGT TTTCCAAA CTA  
TTGGGCATCAACCC AACACTGCA TTTCTAGGAGGGCAGGTAGC TTTA GACGAGAATGGATACATTATTAC  
AGAAA AAGGTTCTTCTCGCACATCAGTTCTTG GAGT GAAA CTGCGGGGGATGTCCAAGATAAA TATTAC  
AGACAAGCTATTACTTCTGCTGGTAGT GGGT GCATGGCAGC TTTA GATGTGCAACGATT TTTAGAAA ATT  
GAGCATTATG CAAAGTGTAGGGATAGACATTATA GAAA TTGATAGGATTCG GAAA TCTTATCAGACCTAT  
GG GGAT CGGTTTCTAAAGAAA ATT TTTACGGAAGGGGAGCGGG TTTA CTGCTTTTCTAAGTC GAATCCCT  
ATGCCTC CAAAGCAGCACGT CAAA CTGC TAAA GAAGCTGTAGCAAAGGC CAAAGGTACAGGCATAGGTAA  
GTTAC TAAAGTG GAAAGAAA ATT GAAA TGCGTAGAG ACTCTAGACAGCCTCAGGTAGTTGTTCCAGAGGCC  
CTATTATGTTCTCTAGGTGT GAAA C GAGT CCTCCTCTCCGTAAGTCATAGTCGCGAATACGCTACGGCTG  
TGGCAATTGCA GAGT AATCAGTAATAA TAAA CAGAATAT CAAA AT TTTA ACTCT TTTA AGTGAT TTTCTCAGT  
GAGCTAAGCTTGT CAAA AACAGAGCGTAGCTAACAGAAGAACACATCA GAAA AGATAGCAGCGGTATTGT  
TGTAGAGCGATGCAACAAAGAA GAAA TAACTGACATGCTTATGATCACAACATACG TTTA GATAAGAAG  
GACCT TTTAATAAAA AGTCCACGGG GAAATTTCTTTA AT GAGTAGCTGAGCATCC AACTCATGCTG CAAA  
GCATGCT TTTA CGTAGGATAAAA GCGATG CAAA ATAGAGGCCAGGATCC ATGCTATAGCAAAGAGCTCTGC  
CGATAGAACAAGA GAAA ATTGGTAGTGCAGGGCAAGATATAGAGA TTTCACTAACAGT CAAA CTCCAGAA  
AACAACCACACAGCTAAGG GGAT GCAGGCAATGC TAAA CCTTG GAAT CATGGAGATC ATCC TAAA GTATT  
T TTTAGAAA AAGAGG GAGTATGCCAAAGCTTATTGATTAGAACAAGGGCTCTTGATTAATAAGC CAAAGC  
TTCGTAGGAT GAGGGACATATCTTGATTAGGATCC GGCGAGGAAGAGGTCT TTTA TGTTGCGCTTG TTTCT  
AACATATATTGTGTT TTTAGAAGAAG ACCCTTCG CAAA TAGACGTCCCTCAAGAGC TTTCT CAAA TCAA  
TGAAGC TTTCTCTGTTCTATGCGTTGGGAAGTAGGTAAGATGCTAGGCTC TTTA CTCTCTCTGTTAGGG  
ATACAAA GAGGG GGGTG CAAA CTA TTTCTGACGTTT CAAA CGTTCCCGCGGACATCTTCTAGCGGCAATT  
CGTCCATCAAGAT CAAA GATCAAC GGGT CAAA GCTTCAAAAACCTCCATCTATGTGAT TAAA GTAGCGAA  
CAAGAC TTTAGTTGTTGCTGAGAGAGGAGAGC GAGT GACCTTATTATCT GAA TTTCTCCTCCGAATACAGAT  
CTTAATGAGCTAATACAGAAGGAT CAAAAAAACCTTTCGACTTCTCGAGGGGAGATGC TTTCCAGG TTTCT  
TAAA GCAA TTTAAAGAAA AGAAA TAATCC TAGAGGTTATTGG TAAA GAGAGAGCTTC TTTATGAG TTTAC  
AGAAGTTATTAGTTACAGACATTGACGGGACAATTACACATCAATCC CACCTACTTCATGATCGTGTGT  
AAA GGC CAAACATCAATACTATGATTC TGTTGGCAGTTATTT TTTCTAACTGGCAGATATT TTTCTTAT  
GCATATCCCTTT TTTCTAAA ACT TTTCTGGTTCTT TTTCTATTAGGTAGCCAGAAT GGTCTTCCGTGTGGT  
CCTCCACGGATAAAA GAG TTTATTTA TTTCTGTAGCTTGTCTCGAGAT TTTCTATGTGT TTTAGAGAAA TA  
T CAAA AAGATTTA GATCTCATTGCCTGTATAGAAT CTGGAGCCTCTAATCGTGATGTATAC TTTCTGAAA G  
GGAT TAGG GAAA ACATCTCAGGAACTC AAAGCGATTC TTGATGCTGTGTAT TTTCTACACCAGAAGCTG  
CGGACTGCTGGT GGAT GTTCAGGGACA TTTA TCAGAA GAAT TTTCTTATGAAGAT CAAACCATTGCCAA  
ATT TTTCTGGTGAGAGAGAGGAAGTGAA GAAA ATTAT GGATAGAT TTTA TTC AATCTCCAGAAG TTTCTTCA

CAGGTAACCATGAATTACATGCGTTGGCCTCAAAAFTTCAAATACGCAGTGCTTTTACTTACCTTAAAAG  
ATGTTTCAAAGGTCAAACCTGTAGATCAAGTTGTCAGACCTTCTATAAAGAGAATAGCCTTTTATTAT  
GGCTTCGGGGATGATGTCAACGATATCGACCTGCTATCTCGAGGAGATTTTAAATTTGTTATACAGACG  
GCTCCAGAGGAGATGCATGGATTAGCGGACTTCAAAAGCTCCCCGGCGAAGGATCTTGGTATTCCTCCG  
CCTGGGAAGCTGGTGAGCTGCGTTACAAACAGCTAGTTAATCCTTAGGAAACATTTCTGGACCTATGCC  
ATCACATTGGCTCCGTGATCCACATAGAAGGTTTCCTCCGTAATTGCGCTAGCTAGGGGAGAGACTAAGA  
AGGCTGCTGCTGCGCTACTTGCTCAGCTTCCATTGGAGAAGGTAGTGGAGCCAGTCTTGGTAGTAATC  
CACCATTCCTCTCAAATAATCCAAATAGCTTTCTGACGGCTAGCTAATGGCCCTGCCGAGATAGTATTC  
ACTCGGACTCCCCAACGTGCGCCGGCTTCCAAGCCAGTACTCAAAATATCACTTTCTAAAGCAGCTCAAA  
CTGCGTTCATTCCTCCGCCATACCTGGAACAGCAGCATGGAAGCAAGATAAGTTAGAGAGATGGTGCT  
AGCTCCTGCATTCATAATTGGGCCAAAATGAGAGAGAAGGCTGATAAAGGAGTAGCTGGATGTACTTAAG  
GCGGCAAGATAGCCTTTACGAGAGGTATCAAGTAATGGTTTAGCAAFTTCCGGACTGCAAAATAAAGAGT  
GAACAAGAATATCAATGTGTCCAAAATCTTTTTCACCTGTTCTACAACCTTCGGATACAGTGTACCCAGA  
AAGATCCAAATAACGTTTATTTTCAAAAATTCCTGAGGAATATCTTCTGGGGTGTCAAACTGGCATCC  
ATGGGATAGATTTTAGCGAAAGTTAGCAATTCCTCATTGGAGAGTTCACGAGATGCATTGAATTTCTA  
ACTCCAAAGATTGAGAGAAAATTTTATAGATAGGAACCCAGGTCCTCCACAAGTATGGTTGCGCTGCTTC  
TGCTAACATCAAAACAATGCCCCAGCCATACCCGTTATCATCGCCTATGCCGGCTATGAAAGCAATTTT  
CCTGTAAAATCAATTTTCAACATGAGCTAACCCCATCAAACTTCTTGGAGAGAGGAGGTAGCAGATTCT  
TTATTATTGAGAAAAGGGCCTCATAATACATAAGGAGTAGATTCCTGGCTGGATCCAGGTTTCTAGAGT  
AAAGAGTTTCTTGTCAAATTCCTATATGGGTAGAGTTAATCAACTGTTTTCAAGTGATTTATGTTTATT  
TTAAAATAACAAATTTTACAACCTGTTTAAATAGTTTAAATTTTAAAGTGTGAAAACAGGTTTATATG  
TAGAAATTCCTGTAAAAATAAAAATCCCTTACAAGAATCCGGGAGTTAAAGGTATGTCAAAAATATTG  
GTAGTCTTGTTCATCTTTATGGAGCCGCAAAATGTGGTTTCATCAGGCAGTGAGGGTAACAGCGAAGAAG  
AGTGACGTCTTCGGTTTCAGACCCGCTCAGGTTCTGGTGCTGCTTCTGCTGTATGCCAGCAACCTACG  
AGCAGCGTTCTACAGAAGGGAATGGTCTAGTGTACAGATACCAATGGTAGGGACGTACTCAGCTAATG  
TGCAAAGCCTTGTGAATCAGGGTCATGGCGGACCGGTTTCTGTGAATAGATGCTACAAAAATATTCGTC  
TAGTGAGTAAGTCTTACATCTATATCCATTGGAGCGGGAGACTCTGTGGATGGCCGCTTCTTCGGTA  
GTAATTACCCAACAGCCTCAAGGATCAGGATCCCTGCAAGAGGTGCTGGTTCTTACAAATGGGGCTG  
TGCCTTCTGGGATGAGTACTCTTACTGGCAATAGTATTCAAACTTGCAAAAGAACTCAAATAACCAA  
TCTAATAGGCGATGCCGTTGATGGAACATCAACTTCTTTCATCTCCATTGCGAGATGCAACCAAAGGAGCC  
TCTACAGCAGACCTTATAGCTCTGTTTCTTTCGTTTAGGAGGATCTGGATCTCAAGGTGTAAAATTCCTCGT  
TAGTTGCCACGTTACTCAGCCGATACTCTCTTTCAGGATCGTTGGATGCCAAAAAGCTCCAAGAGTTATT  
GGAAGCCAAAAAAGAACTCCTCAAAATGACGCTCCACATCGGATGGAGCAAGACCTGGTCTAGGAGAGTGT  
TGTACGCATCCAAATGGAGCATTATCTTCTTCCCCAATCCAAATGTTAGCGCTGTGGGTATTGCTGGAA  
CGGATGACGGAACCTCTGATGTAGCTGCGCAAAGCAACGTTCTGAAAATGCGCGTTATTGTGTCA  
TGATGCTTGTAAAGCCTTGCTGCGCAAGTGCCTGTGGATATCCCTTCTGCGGATGTGCTGACGGAGAAGT  
GGCTGTGGAAGTCAAAAGAGCTTTAGTATGTAGTTGTGCCAAGTATGGTGTGTCAAAGTCTCCTGCAG  
AAGAAGCAAACAAAAGAAATATGCTCGTAAGCTTAAAGATTTAGAAAATGGCTGTAGGTTCTACCACATT  
CATGTTGGGACTACATAATTTAGGGATTTCTTCTCTGATCTAGTAAAAGGAAATTTACCAATCTGCCT  
ACCCCAGAACAACCTAGAGACGGCTGTAAAGACGCAGTTCTAGCCTTGGGAAGTTGATGATGCGTATAA  
CTCAAGAATAATGGTTGGGACGCCCAAACTCTTGTGCAGGAATTTAGATAACCCCTTCTGAAAAGAGC  
TCAAAACAGCGGATTAGCAGGCGGTACACATATGCTGTCTCTTCAAGATCTAACATCTCGTGTAAAAGTT  
ATTACATCTTACAGCAACAAGCAAGAAGCTGAGAAFTTAGATCTTGAATTAATTTGCCTGCAAAATCTA  
GCTTGCAGGTGACAGGAACAGAAGAAGGATTTGTGATGACGAAGGTCAAGGGCTAAAATACAGACCAGTTGAC  
CATGCTTCAAAATAAGTTCTGCTCAGTTCTCTCCGCAGCTATAGGAAATGATCGCAGACCTACAAAGTTA  
ACACCATAACAGATAACCGAGATCCATATGCGTCTGCATGGTAATGAGTGGTATTTCAATAGTTGGCGGAC  
CTTCTAATCAGAGTGCAGAAATACCAAGAATTCAGAAATACAGTCATGCAAGAAAGTTTAAACGCAAAACA  
ATCATCCCTTGAGAGTTTCTAAGAGAACAACAACAGAACTCGAGCAGAAGTGCATAAACTGGTTGTGAAA  
TATGAGGCACAAAGTTCTTCTATCCCTATTAGAGGGTCTAAGAGATCCAAATAGCAAAAGTAAAG  
ATCTTATGAGAGAATGCTTCGCTTCTTGGGCACAAGAAAGCAGGTGTGCAAGCTCCTCTATCTAGAAGTA  
CTTCTCTCCCTAGTATAAAGCCCCTTCTAATCAGCGGAGGGCTTTTATAAATGAGACCGAGCTTCCCAT  
TCTAAGCGGAGGCTCGGTCTCTTTCAAAATATCGGATTCATACTATTCCTCAAACTTACCAGTCTTTAGCT  
TCCAGAACTACTTGTATTAAGACAACCAAAATTTATTGGAGGCTTTTAAAGAGGTTTAAAGGCCAAAATCT



CCG TAAA AAGGGT AA GGGT CTTGTGATGGCGTTAGAGAGGAGATTTC GATTTT TTTT ATTGGAGAAA GGAG  
AAA TGAAGGCTAAGCTAGCTGCGTGAAGCAAAGTCCGCACAAC ATTC CAAA GCTGTTCTTGAT TTTT CGTA  
ATCC ACATCC CAACAATAGGAT GGCCGATTGT TTTT CATATGTAAGCGTACAAA ATGGGTGCGTCCGTGTA  
ACGGGGCGGCAAAGAAG TAAA GTGACTTGGGATAGC GGGTAA GAAT CTCCACTTGGTAATCGTTAT TT  
TA CCGGAAT CAAA ATCC GTAT TTTT CAAATAATACAGCACCAGTTCGACGGTAGCAGGGGGCTGTATAGGT  
TGTAATGATTC CAGAT TTTT TTGGCGTGGTGTCCAAATACTAGAGCAATATAGCG TTTT TCTA TTTT TCGA  
TTT TTT GAATAGTTGTGTAATAAGAGAAGAGGCT CAAA CATG TTTT GCAAAGA GAAT AC ACCC TGATGTAT  
CTCGATCTAAGCGGTGCACAAGATGAACATTGAGCTGATGAGCCAA ATCC TCGGAAGTCTG TTTT AGCAGG  
TTT TTT TAAA TACAGAGATGCTC ATCC TCCCAAAGTAATTGTGGAGAA GAGT GTTCGATGACAAA TAAA  
CTTACTC GGTCTCCGGGCTGCAGCTTATAGGATTC GAAGCGTTCAATGCGACCATTG ACTC GGCAACCAT  
GATAGCGAACGGATTC TAAA ATAGTTTT TTTT GGCAGATGAGGCAGAGAAGTCCGGA GAAA AGAAGAGAG  
CCTTATGTGGCGATCC GCTGTACCAA TAAA TTTT TTGCATAATCC ATTATCGATAAGTGTGTTGGTACGAT  
TTT TCGA GAAT TTTT TATGATAAGAACAGCTTT TTTT CAAGATAAA GAGTGT TTTT CTCTGGAAGC TTTT AC  
GTTTCATGG TTTT TT GAAA G TAAA AGATCGTTCCCTTGGAGAGATTC TCCGACTC CTATCGGGCAAAGGT  
TTT CAGAGGTTATGCTTCAACAAACTC GAGCAGAAGTGGTGGTTCCGTATTT CAAA AAGT GGATG GAAA GA  
TTT CCGAC TTTT CAAGATCTTGCGCAAGCAAGA GAAA GCGATGTGGTGCAGCCAAA GGAGGGGCTGGGTT  
ATT ATTC TCGGGCTAGGAAC TTGCTAGCCGGAGCTCGTGTATTACAGAGAT TTTT GGAGGAGAAA TCCC  
AAACGAT TTTT AGCGCTTCTTAGCTCCATTAAGGGAT TGGGTCTTATACAGCAAATGCT ATCC TTGCACAA  
ACAT TTTT AGCAAAAA ATCC TGCTGTTGATGGGAATGT CAAA CGTGTGATGAGT CGATTACAAA CTATAG  
AGGAATCC ATCGATCGTATGAACACGCGAAGAGAGATCACAGGGC CAAATGAGAG CAACTTCCAGATCA  
GGATCC TCAAGTCATAGCAGAGTCT TTTT ATC GAGT TGGGAGCAA GAA CAAA TAA GAAA CAGCCTC CAAAT  
GAACAGTGTCCGTTGCGTTCAT CAAA TACAGCATATCGACAAGGACTATGGAACAAT ACCCTGTCAGAA  
ATACACGAGCAGCTA TTTT CAGGTTA TTTT GAGCTGTTGTGATTGT CAAA TATAAG GGATCAGGCTTTGAT  
GACAAAACGCGAAGA GAAA GAGATTATGGCAGG CAAA TATGAGT TCCCTTACTACCAGCTTCCCAAAGAA  
GATTGTTGTGATATTGAGAAAATC ATTC ATCTTGTTCAGAAA GATTATGGAGAGACGCTGCAT CAAA TTA  
GTAGCTTTCCTTCTCAAAGCAGGTA TTTT ACTC GCTATCGCGTTACTACT ATTC CCACATGT TTTT TACAC  
AAAATATAG TTTT CC GAATAGCTACACGTTAGCAGAGCTATCAAGTCTCCCAAGCTCATCAGGACATCGC  
AGAAT TAAA GAGACTTTT TTTT AGTC GAGTATCATAAGTC CAAAGAAA AAGATGGTAAGCTGTTCTGGAGAT  
AAATAAAA AATAGTCCGTAGTCTTT TTTT GACTC CAAA CAGCAGAGGTTTTTT TTTT TATGAACG TTTT CAGAC  
CTTCTCAATAT CAAA AATGAAGTGTAC ATCC TGAATAT TTTT GTGACTATGGCCCTAATGG TTTT CAAG  
TTGGTAATACACAAACTGCGATTC GTAAGGTGGCGGTTGCAGTCACAGC GGATTTT GCAACTATTGAGAA  
GGCAATAGCTTGCAGAACCAATGT CAAA CTGTACATCACGGGATAT CAAA GAAGG GGATGCCCT ATCCC  
ATCACAG GGATACTC TATCAGCGTATGCAACGCTTGATGGAAGG GAATATTC AGTTGATAGCTTATCAT TTT  
TA CCGTTAGACGCGCATAACAAGATTGGTAATAACTG GAAA GTAGCAAG GGAT CTAGTTGGGAACAAC  
AGAAT C TTTT GGAAGCTCTCAGCCTTC TTTT GAGT TAAGG GAGT CTCCAGAAA TGGAGTTCATGAT  
TTT CATATCTCAATTATCTGCATACTATCAAACACCGGTATTAGC GAAA GCTCTTGGAG GAAA GAAA AGAG  
TTT TTT TCTGCAGCGCTTA TTTT TGGCGGGCTTATCGT GAAATTTT CGAAGC TAAA AACAGCAGGTTAGA  
CTGCTTCATCACTGGTAAT CAAA ATGAGCCGGCATGGTC TTTT GCGCATGAGCTGGCT ATTC ATTT CAAA  
GCT CAAA GACATACAGCTACT GAAA AAGTTGGTCCAAAAGCCTTGGCTCAATA TTTT AAAAGGAGC GGGTT  
TAGAAT CAGTTGTGTT CAAAGATACGGACAACCC TT TTTT AATTAAGAAA GGCTCTATCG GAATAGCAACT  
CTTT CATAAAAACCC TCAAGTTCATTGGTAAGATTC GAAG GAAA TGCTCCTCGTTTT TTTT AGATAAGAGTA  
ATC GGATAGAGAA GAAT TGAAGTATGCTCGAGCCTG TTTT AGAAA GAGGACGAGCGATATCTCCC GAAA CA  
CAAA CGTGATAAAA ACTC TCTTCCACGATGAGATACAGTAAGGCTCTCGCAG TTTT TCC TAAA GTTGGTA  
GAGGAGAACAAGA TAAA GACCC TC TAAA TTTT CAGAGACGGCACAGGTGTAGTAG GGATTTT CTTATAGTT  
GTT CAAA ATGCCACTGACTCTCGTG CAAATACATAGACAACG TTTT AT GAATACGGGGATTTGATCAACA  
GATG ACTC CAACTGTGAAGAAT GAAA CTGGTGCAGCTCATTAGAAT GATTGATAAA GCTATCC CAAA GA  
ATGACCAG CAAA TCTTAGAAGATCC TTTT CAGGG GAATACAGTTAGAGATGTTCC TTGTAGGAT TACATC  
AGAAA TATCGATCTT TTTT C GAAA GAAT CATGGTAACAATAGAGT ACTTGAGACTC ACGTACTCAA TTTCT  
ACCGCATAG GGAT ACTTATCGGAA GAAA GAGGAT TGT GGATACA TAAA TGGC GAAT CTTCGT CAAA GAAA  
GACCGGGG GAAA TATTGCCAACGGTCACTTGAGCATGCAACTGTTGGATAGCCACTGCTCAACAATACT  
TTT TTTT TTTT ATCC AGAAGTACCC TACAATACAACAGGCTATGA GAAA TGGCTCTTGATTAG TTTT AAAC  
ATAGAAA AGGAT GGTGCTAAGCACTAGATG TTTT CGATAGAG GAAT TAGA GAAA TATTAG GAATC TAAA AA  
AAAGCCTCGTTCCT CAAAG GAAA CGAGGCTCGAA GAAT CTA CAAA TTCCATTAGAG GAAT TAATAGTCC

ATTCCTGCGCCAGGCATTGCTGGAGCTGCAGCAGGTTTTCCTTCTGGAATCTCTGCAATGAGAGCTTCTG  
TTGTCAAAGTAATCCAGCTACGGAAGCCGCGCTTCTCTAAAGCAGAACGGGTACFTTAGCAGGATCTAA  
AATACCAGCTTCAAGCATATCTGTGTATGCATCACGCAATGCATCATATCCTTCTGTTTCGAGAACGGGAC  
ATAACTTGTGGAAAGATGATAGCACCTTCTTTCCTGCGCAAA CAGCAA CAAATTTCAAAGGAGCGGAAA  
GAGCFTTCAAACAATGCGAGCTCCAA CAACTCATCTTCATTAGTCAACATTGGCAAGAAGGCTTCAAG  
AGTAGGGATACAACGGATTAATGCTGTTCTCCACCAGGAA GAATTCCTTCTTCAACAGCAGCGATTGTA  
GCATGTTGAGCATCGTCTACACGATCTTTTTCCTCFTTCATCTCAATCTCTGTTGCAGCTCCAACGC GAA  
TGACTGCTACTCACCAGAGAGCTTAGCAAGACGCTCTTGAGGTTTTCCTTTATCGTAATCAGAAGAGCT  
GTCTTCAA CAAATTTCAAATGCFTTCGCAACGAGCTTCTAAA GCTTCTTTTTCACCCATTCCTTCGACG  
ATGGTCGTGTCTTCTTTAGAAA CGATACTTTTTTAGCTTTTAACTAACATAGCTAAGTTAGCGTFTTC TA  
AFTTCATGCCAACTCTTCGCTAATGAGTTGACCGCCAGTTAAGATAGCGATGCTTCCAACATAGCTTT  
CTTCTATCTCCAAAGCCTGGAGCFTTAACTGCGCAA ACCCGGAATCTCCAC GAATTCGTTCACGACC  
AAAGTAGCTAAA GCTTCGCCTTCAATGTCTTCTGCTATAATAAGAAGAGGACGGCCGGATTCAGCAACTT  
GTTG TAAACACGGAAGGAAATC CAAATCCAGAAA TTTCTTATCGTAGATTAGAACC AAAGCGTCTTC  
TAATACACATTC TTGAGTTTC TGACA AATTTGCGAAGTAGCTAGAGAGGTAACCTTATTGAAA TTCATT  
CCTTCAACAACATCCAAAACGGFTTCAAATCC TCAA CTTCTTCAACAGTGATAGAGCCGTTTTC CCAA  
CTTCTCCATTGCTTCAGCAATCAGATTC CCGAFTTC TGCATCATTATTAGCA GAAA TTGTTGCAACTTG  
AGCAA TTTCTTTATGATGCTGAACAGGCTTGCTGATTTT CAAA ACTTGATCAACAACAACCTTAACAGCT  
TTATCAATACCTCG CAAAAGGTCCATTGGACA AACTCCAGCTGTTACATTGCGTAATCCCTTCTGTATAGA  
TAGCTTCAGCAAGAACAGTAGCTGTTGTAGTTCCGTCTCCAGC CAAA TCAGCAGT CAAA CTGGCGACTTC  
CAAAACCA CAAAAGCGCCATATFTTCATG CAAA TCGGCAAGCTCAACTTCFTTCGCAACGGTAACCCA  
TCTTTAGTTACTTGAGGGGATCCGAAGCTTTTATCTATGACAACATGTCGTCCFTTAGGCCCTAGAGTGA  
CTTTTACAGCTTCAGC TAAAGTCTTAACTCCTT CAAA AATTTTCTTTC TGGCTTCTCGTTGTA TTTAAT  
GTTTTTAGCGACCATTGATGCGCTCCT TAAA TCTTACTTCACTCTCTTAGTT TTTA TTGCAGAACTGCGA  
TAACTTCGCTCA CAAA AACGATGACGTACTCTTACCTTCGACAGT GAGTTCTTGCCAGAATA TTTATC  
AAT TAAAACGATGTCACCAACCTGAACTTCAAAGGAAGTTGCTGCC TTTATCATCTTT CAAA CTTGTT  
CCTAGAGCTACAACCTCAGCTCTATCTTGCTTTTC TTGGCAGTGT CAGGAAGAAT GATTC CGCTCTTG  
CAGTGGAAGCTTCTTCTTCTCT TTTAAC TAAAATTC TATCTCCCAAAGG TTTAATCTTGAGGGTCTTGC  
TTGATCTGACATG TTTAAGCTCCTCGTATTTTATATTCTATGAGGCCCCGTGGTCCGGC CAAA TTCCGC  
TACCAACGTAGGGACA AAAACGATAGAAGCTT CAGAGGAAGAACGATAGCAAAGTCTCGCTTT CAAACA  
ACTGG TTTAGCAGTTGGCATGATCAACTGCTATT TTTAAAAA TTTA TAGCAAGCTAGCTAGTTCTTCCAG  
CTTCCGTTTCGATGTAG GAAAAGGC TTTAAGCATAGGAGCTGATGAGGTCATATCCAATCCAGATTT TTTTC  
AAAA TTTGATAGG GAAATCGGATCCGCCGCTACGCAAAAATGTGAGATATGCTTCTTGAGCACCTTCTT  
CTCCAGAAA GAATTC TTTCA GAAA AACACAACGATGCAATGATTC CAGTGGCGTATTGATAAA CATAGAA  
GTTGTAGTAGAAA TGAG GAATGCGAGCCCATTC GATACAGCTATGTTTCATCAAAAAGTTATGCAATCGCCA  
TAAA ATAGGCGCTGCAG TTTCTCGTAAC CAAAAGAAA GAATTC TTCAGTTAATGGGAGACCTTGTTCGG  
CTGCA GAATGCA TTTCCAGCTCAAAAAGCAGCAAATAGTG CAAATCG GAATAAA GTTGCAAAAACAGTGTC  
TAGAGAGCGA GAAA GAATAGCAATCTTCTTCT TTTAGACGGAGCTTGT TTTA GCA GAAATTC CATCAAT  
AGGG TTTCAATTGAGGGTTGAGGCGA TTTCCAGCTA GAAA AATC GGAT ACTGAGCTTCATGATAAC CAAAAT  
G TTTATGACTCAA GAATGAGTGCATACTATGACCACCTTCGTGCGCAACTACCGATAACGTCGTATAACGT  
TCCTGTATAATTGAGAA GAATGTAAGG CAAACTGTTATAAC ACCCAGAC GAATATGTCCTGAGCG CAAA  
TTAGTAT TTTCCATA TTTATCT ACCCATCCATCGGAAGTGAGACC CAAA CGTAGAGTCTCTACATAATCGT  
TCCC TAAA GGGGACAAGCTATCGCAGATCAGAGT GACAGCTTCTTGATAAGAAT AATGGCGTGAAGCTTC  
GCTAGCGACCAACGGTGCCTAGACATCATA GAAA TG GAAATCTGAGAGACCAAGAGCTT CAAA TTTAAC  
T GAAAATACTTAGTGATCAGGTGTGTGTGTTG TTTAACGGTATCAATGAGCGTGGTAACACAGAAGTGC  
TGATATCATTCTGAAA TAGTGCTGCTTC TAAA CAA GAATCATAATCGCGAGCT CAAA CATT GAATAGATG  
GGCTT GAAT CAAA CCATTCAGTAGATTC GCGAGAGA TAAACGAT ACCCGTGATGGCGTTGACATTT TTTTC  
TGATAAGTGTTC AAA CGTAGCTCCCGATCTGTAGATTGCATGTATAGAGAAGCTAGAGCGTGAGAAA GGG  
GATGAGATTTA CTTTCG GAGTGCACAGCTTCCCCAAAAG GAA TTTCA GAATCTGTTAAGCTACAAAAAGT  
TTTATAGGCTACTTCCAATGCAGG GAAA GAAGACGCTAGGATTT TTTCTTCTCGAGAAGTTCTGTGTGC  
GGAGC TAAA CCGAATAGTTT TTTCAAATA GAAA TGGTATTCCTGAAGTTCGGGAGAGGCTAATAGCATAT  
TAGCCACTTGCTGAGGGAGGGCGATAAGGGCCGGTT GAATCCAA GAAATTTCTCTACAAATGATGTGAG  
CAAGAAGGTAATAGAT TTTCCAGATCAGCTGCGGCTTCTTGATTC GCAATATCC TCATCAT GAGTAAGATGA

CGGTATACATAAAAGTTTATCCAAAGTTC TTTC AATA GAAAAGACTGTGGTTAGCAGCTCACGAAGAGAAG  
AAGGTTGT TTTA TATCAAATTGT TTTC GCTAAGGTGAGGCCAAAATGGAGCTCCTTCAGCACCTACTTT  
T TTTAATTCTGTCTTGCCAGACTTCACG ACTCGCATACAAAT TTTC GT ATCC CAGCAGTCA GAAA GAGGA  
ACATCT TTTC TAGAGCG TAAAGCTG CAAATGAAGTAGTAGCAGTGGTCATGAAT CTCTCCTTAGAGGAAG  
CTG TTTA TGCTTGTGTCAGC TAAA TCATCAGCTCCTTGTTA GGAT AGCCAGTAAGGAGAAGA GAGT TAG  
CTG TTTC TTGATCAAAGAGAGCAG TTTC GATCAAGATCGA TTTC TAATCAAGTTT CAAA CCTGTAGT TTT  
CTGTGATCAAATGATCTTAGCTCT TTTA TTGACTGTAAGA GAAT TAATCTGTAT GGAT ATAAGGTCGTCT  
TTA TTGATCGATGTGATTGGCAAGCCTTCTCAGATTGATAGCC CAAA TAACAGGTGTGATAAAAAGGTATT  
TATGGAGAAAT TTTC AGATGCAGTAAGCGAAGCCTTA GAAAAGGCG CAAAAGT TAGC TAAA AACTC TAAG  
C ATTC CTACGTGACA GAAA ACCA CAAA CT GAAA AGTCT CAAA CAAA ATCC AGGCTCCCTAT CAAA CAAA G  
TCATTAAG GGAT GTGCACGGTAATCTTGG CAAA CTTACTTCTGCTGTGGACGACGCCTTACGCAGAGAACC  
AACTGTAGTCGAGGGAACCGCTGTTGCTAGTCTTCTCCAAG TTTA CAGCAGTTGTTGCTCAATGCGCAT  
CAAGAAGCTAGAAGTAT GGGT GAC GAAT ATCTATCAGG GGAT CACAAA TTACTAGCTT CAAA GCGATCGA  
C TAAA GAGCCT CAAA CTTCTTGGAGAAA AACTG TAAA AACTACTTCTGAAGCGTT GAAA GAAT TAATTAC  
TAAA TTAAGACAAGGAAGTCGTATGG ACTC ACCTAGTGCTGAA GAAA ATCT GAAA GGATTAGAGAAA TAC  
TGCAAAA CAAA ACTGTACTTGCAAGAGAAGGCAAGCCTTGATCC TGTGATTGGTCGAGATGAAGAGATTA  
GACGTACGATACAGGTTT TTTC TAGACGAACAAA GAATAATCC TATGTTGATAGGGGAGCCCG GAGT TGG  
GAAA ACAGCAATCGCTGAAGGACTTGTCTTTCGCATAGTGCAAGG GGAT GTTCCAGAGAGT TTTAAA GAA  
AAGCATCTGTATGTACT GGAT ATGGGAGC CAAA ATTGCAGGTGCCAAGTATCGAGGAGAG CAAA AAGAGC  
GGT TAAA AAGTGTATTGAA GAGT GTAGAAGCTTCTGAAGGC GAGT GT ATCC TATTC ATTGATGAAGTGCA  
TAC TTTA GTAGGAGCGGAGCTACAGATGGAGCTAT GGAT GCAGC GAAT CTAT TAAA GCCTGC TTTA GCA  
CGAGGCAC CAAA CATTGTATTGGCGTACGAC CAAA AATGAAT ACCAAAAATATATAGAGAAA GACGCGG  
C CAAA GAACGGCG TTTC CAGCCTATT CAAA TAACAGAACCTTC CAAA GAAGATGCTGT ATTCATTC TCCG  
GGGG TTAAGG GAAA AATAT GAAA TT TTTC ATGGTGTGCGCATTACAGAAGGGGG CAAA AATGCAGCTGTA  
GTTT TTTC TTATCGTTACATCACAGACCGATTTT TTCTGATAAGGCGATTGACCTAATTGATGAGGCTG  
CGAG TTTA ATCC GTATGCAAATAGGAAG TTTA CCTCTGCCTATTGAT GAAAAG GAAA GAGAAT TATCAGC  
TTTA ATCGT GAAA CAAGAAGCTAT TAAA CCGAGCAAGCACCAGCTTATCAGGAAGAGGCTGAAGACATG  
CAAAAAGCAATTGACC GGGT TAAAGGAAGAGCTGGCCGC TTTA CGCTTGCCTG GGAT GAAGAAAAGGAT  
TAATTGCA GGAT TAAA AGAAAAGA GAAT GC TTTAGAAAATTTAAA A CAAA CCGAAGAGGAAGCTGAGCG  
TACTGCCGATTACAATCGGGTAGCAGAACTACGCTATAG CAAA ATTC CTTT CAAA GAGGAAGAAA TTCAT  
TTA GCTGAGGAAGC TTTAAA TCAAAGAGATGGGCGCCTGCTTCAAGAGGAAGTTGATGAGCGGTTGATTG  
CGCAAGTTGTTGC GAAT TGGACTG GAATCC CTGTGCAAAAATGTTGGAGGGAGAAT CT GAAA AGTTATT  
GGTGTGGAGGAGT C TTTA GAA GAAA GGGTGTGCGACAACC TTTC GCTATTGCCGAGTCAGTG ATTCG  
ATTC GAGCTGCTC GAGTAGGAT T GAGTATCC GCAGCGTCTCTAG GAGTG TTTC TA TTTC TTGGACCTA  
CAGGAGTAGG GAAA ACTGAGCTTGC TAAA GCATTAGCAGAGCT TTTATTTA ATAAGGAAGAAGCGATGAT  
TCGG CAAA ACATGACC GAATATATG GAAA AAC ATTC CG TTTC CAAATTGATA GGAT CTCTCCAGGGTAT  
GTA GGAT ATGAAGAAGGAGGGAGT CTCTCAGAAGC TTTAAGAAGACGACCTTATTC TGTGTTCTT CAAA  
ATGAGATA GAAA AAGCAGATAAAA GAAGTAT TTTA ATAT TTTA TTGCAGATT CAAA ATGATGGGATTC TTAC  
GGAT AGCAAGAAGCGTAAGG TAAA TTGTAAGAAT GCTCT TTTC ATTATGACATCAAATATTGGTTCCGAA  
GAGCTTGTGATTATTGTACTAA GAAA GGA ACTATCGTAGACAAAAGAGCTGTGTTATCTGTTGTTGCC  
CTGCGCT TAAA AATTAT TTTA GTCCAGAATTTA TCAATCGTATCGATGAC ATTC TGCC TTTC GTTCC CAA  
AACTACGGAAGACATTG TAAA AATTGTCGGTATTC AAAT GAAT C GGGT TGC TTTA CG CAAACTG GAAAGA  
AAAA TTTC GTTAACTTGGGATGATTC TTTA GTGCTA TTTC TCAGTGAGCAAGGTTATGACAGCGCT CAAA  
GAGCTCGCCCTCTGAAGCG CAAA ATACAGCAAAAAGTAGTGACTATGTTGTC TAAA GCTCT CAAAAAAGG  
AGATATCAAACCTG GAAT GGCGGTAGAGCTTACTATGGCAAAAAGATGTAGTTGTG TTTAAAAT TAAA ACA  
AATCC AGCTGTGTAGGACG CAAA TGTG CAAA CGGCATT GGAT GTGC TTTA TTG GGAT AGGCAGTCTTCTG  
TTACCGACCGCTCTGCGAGCGACTGAAC GGAT GA GAAA GGAGCCT ATCCCGCTCCTAGATAAGCAACAAA  
GCT CAAA GAATGTAG ATCC TTATTGTCTG GAAT CTATATGCGCTTGT CAAA TAGCGCATCGAG ATCC CAA  
AAGT GCAAAACGGTAAATGTATCTG TTTC CTGAGCTCTCAGAAGA GGATGTATCTGTT CAAA CTGATGC  
AT CAAA TCTTCAAAGCGTCC GAAT ACCTTT TTTC AAAATCGGAGGAAGAGCTC CAAA CAAAATTGAT CA  
AA CCAA GGG TTTC TCTAGGTGTTTATCGGGACGATGA TTTA GCGA GAGTGTGGTGTAGCGGAGCCTTC  
TGCGGAAGAGCAAAAAGGCTCGATACT ATTCATTGTATCT GGAT GT TTTAGC CAAA CGTGCATACGTT GAA  
AGAGAGCG CAAA GC GAGT GCTGCACACGGAG ATCC TGAGCGGATAGA CAAA GCAACCATAGAAGCTATTA

ATACCATCCTTTTTCAGGAAGAAA GATGGAGGTATCC TTCAAAACAAGAGATG CAAAAAGCAGGT TTTCT  
TGAGT TAGCTGCTGTTACAGATAGTAAG CAAAGAGCAA CTTGGAACTGTAGTGC TTTATCAAGCTGTC  
GCCAGCGGCTTGA CAAATCTCTGG ACCCTGTC ACCCTCCTGGACATA TTTA CTTACGCTATAAGGACA  
AGG TAAA TATT GAAA CCACTTCTGGAGGAAGGCATCTTCTACT GAAAGGTATTGT GAATGCA TAAA AGA  
GT CGCAGT TAAA GGTGCGTTCGCAGATGGAGCTTATA GGGT TAACT TTTAT GAAT AGAGGAGC TTTCTTC  
AAA CAAAAAGGAGAG TTTCTTCAGGCGTCCTTAGCTTATGAGCAAGCTCAATCATA TTTATCAGACGAGC  
AGAT TTTCTGACAAA TTAGGGAT TACTTATGTTCT TTTAG GAAA GAAGGCGGCGGGAGAGGCTCT TTTAAA  
GAAA TCTGCAGAAA AGACTCGGCGA GGGT CATCTATCTATGACTA TTTCCAAGGAT ATATTTCC CCCC GAA  
ATCC TAGGGT GTTG CAAACCGATTC AGGGGT GACCTATCAAGAAA C CAAAGAGT ATC GAAAAAACTAG  
TGATGC TTTCCAAGAAGT ATCCAAAAAGT GGAT CTCTTAGGTTGAGGTTGGCGACAACAGCATTGGAGCT  
AGGGCTGGTTAAGGAGGGGTGCAGTTGTTAGAAGA GAGT GTTAA GGATGCCCCAGAGGACCTCTCT TTTA  
CGTCTGCAGT CAAATAAAAATTC CAAA CAATCGACATGATTATGTCCGAGCAAAAATATCAT CAAAATCAAG  
CGCAAGCTCTTCTCAT TAAAGAGGGGT TGT TTTCT C GAAAAAACTTCTATA ACTCTCT TAAAAACTATCGG  
GAAA AAGCTATCTCTTGTGCTCC GAGT TAAA CCGAGCCTTCTAGCTAT CAAATAAA TATTTTAACAATT  
TAGATTCTTCAAAGCTCAGCGAGGGCGTGAAGAAT CTTGTTT CAGGTGTACAAAAAA AAAGCAAAT TTTAA  
ATAGTTTT TTTAGT TAAAATGGGT CCC TAAA TAA TTTAAATCC GGTAGTT CAAACGTC CCGAAA CATTTGT  
TTA TAAGTGAGAAA TGAGATCTGGC TAAAATCTGT CGAAGTGAGG TTTATGACGAAGG TTTATGCGCATA  
GCATTCAGCAAGAGA GAGTTGT GGATAGGATAGCTCT TTTA GAGAGATGCTTAGATCT GAGTAAATTCATT  
GCCGACAGC GAAA AGATTGGCGGCAGTTGCTGTGGCCACTATATTGGCCATCGCTCTTCTAGTTGTTGCG  
GGCTTGTGTTCTCTG GAGT GCTCTGTAGCCCTG TTTCTGTTGTAGCGGCATC TTTA TTC TTCG GGGTAG  
GAGC TTTCTTTTAGGAGGAGC CAAA GTTGGAG GAGT GCTGACTACAGAAGCTGTGACTAGAGAGCGGTT  
GCATCGATCACAAAC CAAAATGTGGAACAAC TTATGCTG TAAA ACAGCAGAGGTTGAGCAGAAA ATCTCG  
ACAGCTAGTGCAAATGCCAAAAGCAATGATAAGCTC GAAA ACTCGGT GAGTAAA AAAGGGGCGAGC TAAA  
GGC GAGT CCGGT TTTAAA GATTAGCTTCATTGAGAGGCTGTT TTTA GAGGTT TTTA GGAGGCTCTATGGA  
AT GCGT TAAACAGTTATGTAGAAA CCATCTACG TTTA GACAACCTTGACGGATCCTGTGCGCTCGGTGTTG  
AC GAAA GGAACAACCTGCA GAAA AAGTT CAGCTAGCAGCATGCTG TTTAGGAGTTG CAAATTCGATTACA  
ATTTAGC CAAAGGAAT CGCTGCAGCGCAGTGGGTG TTTCTGTGTGGT GGACAAA CTCTT GGAT TGGGTAT  
TATCGCCATTC TTTAGGGAT TGTATTG CAAA CAACATCTGC CAAA GATGTTCTAGAGAATCATGG CAAA  
GTGGGATGTCCATTTAAGTTGCCATGCAAATC GAGT CCAGCTAATGAACCTGCTGTACAATTC TTTAAAG  
GTAAA AATGGAAGCGCAGACCAAGTGAT TTTA GTA ACTCAATAAGACAATGGGAGACGTGATGATACAGA  
GCGT GAAA ACAGAAA GTGGGT TAGTTGATGGTCATACGGAAGCTGTG ATTC CAAA GGATGTGTGGTGGG  
AGCGCTAGC TAAA GTTGC GAAA CTC GTAGTTGCTCTCGCCGCTCTTGT CAAAAATGGGGC CAAA TGTGTT  
CTTTACTGGTTGC TTTA TGTGTGGGAGCTACTC CTGTAGGGCC TTTAGCCGT TTTA GTAGCGACAACAC  
TGGCGAGTCTTGTGTAGCTTATGT CAAATTTA TAGCTGCTAAGGATCGGGATGGATCGCTTCTAC  
AAATAAGTGCTAGGCAAACTC GAAA AGCAGACTTCTCTAGGCTCTGCTAGCTTT TTTAATGACAA GAAA  
C GAAACAAAATAAA GGGATAGGG GGATACATGATCTGTTGTGACAAAGTCTTGTGTCGAGCGTACAATCAAT  
GCCTGTTATAGAT TAAA TGCTCTGTAAC GAAATGCTTACAACGGCTAAGCAAGCAGTTGTTCTTGCCTTG  
TC CAAACAAACGGTG CAAA CTTCAGGAAG TTTA TCC ATATTATCAGCGGCGGTACTG TTTA GTGGCACTG  
CTGCTGTTCTCCATATCTGCTGATATTAACAACAGCTCTTCTA GGATGTG TTTA TGCTGTTATTGTGCT  
TTTA AGAAG TTTA TCAGCAGTTGTTCA GAGTTG TAAA AAGAGATCACCTGAAGAAA TTGAAGGGGCTGCT  
CGTCCCCTGATCAGCAG GAAT CAGGAGGACG CAAA TCCGAGGAGAGCGCTTACCACAAGCATCTCCTA  
CTTCGTCTAC CAAA CGTCTTGAATCC GCT TTTCTGCTCAATAGGAGATAGTG TTTCTGGGGCATTCGATGA  
TATAAA TAAGGACAACAGCCGTTCTCGATCACGCTCCTTCTAA GGATGACATGTGATTCGCGTAG GAAA  
AGAGGAGGGAGACCTCCTCTTTTT TTTAT CAAA TAGAGT TCCGTTACTATTGGC ACCCTGTGTGCAGTT  
AGGATGAGT TAGACTAGTTCTGCAGCCT TTTACAGGGT GTTATGT CAAA CATTGCAAAAAGCTCCTAAGAC  
TAGGAGCTT CAAA TAGA GGGT GATGCAGAC TTTCTGGGGGAGGAGAGCGTCTCTCTTATCTGGGAACACA  
GATCTGAGCTCTCT TTTCTGTTGTAATGCA CAAA ACTGGTAA GAGT TTTAGAAA GTTGT GAAA GTTGTCC  
AA TTTCTATCTCGTAAGCTATCAC GAAT TGT TTTAATCTTCAATAGCCGCTGTTAATG ATTC CTGGTTA  
TGCGCTAATCGGGCAACTTCTTCTGCTAATGGGGT TAGGAAT CGGATTTCTCTCTTAAATGAGGCAACAG  
AGCC TTTAAGATCTGCTATGAT TTTCTTGC GAAA AGAG CAAACGCA TTTCTTCTGTA GAGTT TTTA TACTC  
ATCC AAAAGAGATTC AAAACC TTTA TAGTTATCTC TAAATCC TTGCAACAAGAA TAAA AATCTTGAGAT  
ACAGCAGAGAGGTC TTTAGATGTGCTTGC AAAATTC TTTAGATAAA TGAA GAAA TTC TTTCTGTAGAACGC  
TCAGCAT GAAAT TAA TTTCT TTTA GAG ACCCAACTTCTC CAAA CAGATCCTGGTATAGATGTAGATTAGC

GGT T T T C T G T A G A T A A A G A G C A T T C C C T G C T A A T G A G G T A A T G A A T A G G G C A A G A A G A A C A A T A G T G A C A  
A A T G G A G C G A T C A G A A A G C C A A C A A G A T G T C C C A A A A G A G C T A A A A A G C C T A T T G T G C C T A T A A G A A T T A  
G G G A G G C A A T G G C T G C T A T T T T C T T A A T C A A A T C C A T C A A A G A A G G T T G A G G T A C G C G A T T G G C T G A G T A  
G G A A G G T G C A G G G G A G A T G G A G G A G T C A C G A T T A G A G T A G G C G T T G T C A T A G G C A C T T T C T C A T T T A A A  
G T T C T C T G A A A C C A G A T C C T A G G G C T T T A T A T G A T A A A A A T T C T A T G T A A A A A C C A G C T T A C A T G T A T T T  
C T A A A G C A C A A A C A T T A A T A T T G T T G A C T G G A T T A A C G A T C A A T T T C T G C A T A T A G G A C A G A G T A G A A C A  
T G T T G C A T T G G C G A T A C G A A A G C A C T G A T T G C T A T G G A G G G A T T C A A G A A A A T T C T T G T C T G C G C A G T G C  
A G A A T C G C C A A A G G G T G T G C C T G T C G T G A A A T G T A T G T A A A G A G A A A G G A G G A T A G A G G G A A A C T C T T A  
G T T C C C C A A A A T A A T T G C C A T T G T A C A C T C T C C T T C T T A T C A T A G A G A G T T A A A A T T C A A A A C C A C A A G  
A T T G A A G T G T A C G T G C G T C A T C T C T A C A G A A G G A A T A A G A G A A G A G G C C A T G A A A A A C A A G G G G T G T T  
G G T A G C T C C A T C T A T T A T G G G A G C T G A C T T A G C T T G C A T A G G A A G A G A A G C G C G A A A T A T A G A A G A G T C C  
G G A G C A G A T C T T A T T C A T A T A G A C G T T A T G G A T G G A C A T C A A A T T C C C A A T A T T A C T C A A A G T C C C G G A G  
T T G T T G C T G C G A T T A A T C G G T C A A C A G A G C T A T T T C T G G A A G T T C A T G C T A T G A T T T A T A C G C C T C A A A A  
A C A A A T A G A G G C T C A A A T T A A G G C C G G G G C G G A T C G T A T C A T T G T G C A T C A A A A G G C A G C G G A A A A T A T T  
A A A G A A A T T A T T A G C T A T A T T C A A A A T G C G G A G T G C A A G C A G G G G T A G C T T T C T C C A G A G A C T T C T A  
T A G A G C A A A T C A C A T C T T T C A T A C C T C T A T G C G A T G T C A T C T T G C T T A T G T C T G T G C A T C C T G G T T C A A A  
T G G G C A A A A G T T C A T T C T G A T A C G A T A G A A A G A A T T C A A T T C G T T A A A C A A G C T A T A C A A G T C C T A G G A  
A G A G A A G G A A G T T G C T T G A T T G A A G T T G A C G G T G G T A T T G A T A A A G A G T C T G C A C G A G C A T G T A G G G A A G  
C A G G C G C A G A T A T C A A A G T T G C A G C C T C C T A T T T T C A A A A G A A A G A C T C T A T A A A T A T G A A A G A A A A G T  
C A A A T T A C T T C A A G G G A A G A A C A T G G T G C T A A G T A G C C A A C T C T C G G T A G G G A T G T T T A T C T C T A C A A A  
A G A T G G C C T A T A C A A A G T A G T T T C T G T T T C G A A A G T C T C A G G A A A C A A G G G G A T A C T T T T A T T A A A G T A  
T C C T G C A G G C C G C T G G A T C A G A C G T G A T A G T C G A G A G A A A T T T T A A A G C G G G C A A G A G G T C A A A G A G G  
C T C A G C A A A A G C C A A G A A T T T A G A G T A T C T A T A T C T G G A A G A G G A T A A A T A C C T A T T C T T A G A C T T A G G  
G A A T T A C G A T A A G A T C T A T A T T C C A A A A G A A A T T A T G A A A G A C A A C G C C A T G T T C A A A A A A G C A G G T G T T  
A C C G T C C A A A C T T T A G T G C A T G A A G G C A C T G T T T T T T C T A T G G A G T T A C C C A T T T C T T G G A A T T A A T G G  
T T G C T A A A A C A G A T T T C C C T G G A G A C T C T T T A T C C T T A T C A G G A G G A G C C A A A A A A G C C C T C A A A G A A A C  
A G G A G T A G A G G T C A A A G T A C C G C C T C A A A T A G A A A T A G G A G A T G T T A T T A A G G T C G A T A C G C G T A C T T G T  
G A G T A T A T T C A A C G C G T C T A A A T T G G G G A T A G C A T G G A T T T A A A G C A G A T A G A A A G C T C A T G A T T G C T A  
T G G G C C G T A A T A A A A T G A A G C G C A T T G T T A T C A A G C G T G A A G G C A A A G A G T T A G A G T T A G A A A G G G A T A C  
A G T C C C A A G T A T T C A G G A G C C A G T C T T T T A T G A T A A C A G A C T G C A A A C T G G A T T T C C C A A G A A A G A C C T  
A T T C T A C A G A T C A A A C C T T G G G A A T C C T A T T G T T A A A G A G A G T A T C G A G A A G A A A G A A A G T G A G G C G C  
C T G C T C A G G G A G A T T T T A T T G T T T C T C C G C T G G T C G G C A C T T T T T A T G G C T C C T T C C C A G A G G C T C C  
G G C A T T T A T T A A G C C T G G G A T A C T G T T T C A G A G G A T A C C G T T G C A A A T A T C G T G A A G C T A T G A A G G T A  
A T G A A C G A G G T A A A G C A G G A A T G T C T G G T C G C G T A G A A G A A A T A T T G A T T A C T A A T G G T G A T C C A G T C C  
A G C A A A G T T C T A A G T T A T T C C G T A T A G T T A A G G C T T A G T T A A T G A A G A A A G T A T T G A T T G C A A A T A G A G G  
C G A G A T A G C T G T T C G G A T T A T T C G A G C A T G T C A T G A T C T A G G A T T A G C T A C T G T T G C T G T A T A T T C T A T G  
G C G G A T C A A G A A G C C A A A C A T G T G C T T C T T G C T G A C G A A G C T G C A A A T A T T G G A G A A G C T C A G G C A G C A A  
A A T C C T A C C T A A A G A T C G C C A A T A T T T T A G C T G C T T G T G A G A T T A C T G G G C A G A T G C T G T G C A T C C T G G  
T T A T G G T T T C T T A A G T G A A A A T G C A A A C C A A A C T T C T A C A A A T G A A A G T T G T G G G C T C A C A T T T A T C G G T  
C C T A G T G C T G A G T C G A T A G C G A C T A T G G G A G A T A A A G T C G C A G C T A A G C A G T T G G C T A A A A A G A T T A A G T  
G C C C T G T A A T C C C T G G A T C T G A A G G T G T G G T G A A G G A T G A G G T G G A A G G G A T T A G A A T C G C A G A A A A G A T  
C G G A T T C C C C A T C G T C A T C A A A G C T G T T G C T G G A G G C G G T G G A C G A G G A A T A C G G A T T G T T A G A G A A A A  
G A C G A A T T C T A T A G G G C T T T T A C T G C C G C T C G G G C T G A A G C A G A A G C G G G A T T T A A T A A T C C T G A C G T G T  
A T A T T G A A A A A T T T A T T G A A A A T C C A A G A C A T T T A G A A G T T C A A G T T C A A G T A A T T G G A G A T A A G C A C G G A A A T T A  
C G T G T A T C T T G G A G A A C G A G A T T G T A C A G T A C A A A G G C G T C G G C A A A A T T A A T A G A A G A G A C T C C A A G T  
C C T A T T T T A A C T C C A G A A A T G C A A G C T A A A G T T G G A A A G T A G C A G T G G A T T T A G C T C G G A G T G C C G G G T  
A T T T C T C T G T T G G A A C A G T A G A A T T T C T G T T A G A T A A G G A G A A G C G T T T T A T T T C A T G G A G A T G A A T A C  
G C G T A T C C A A G T G G A A C A T A C T A T T A C G G A A G A A G T G A C A G G G A T C G A C A A A T T A A A G G C T C A G A T T A G T  
G T C G C T A A G G G A G A A A A C T G C C T T G G A A G C A A A A G A A T A T A G A G T T T T A A A G G G C A C G T G A T T C A A T G C C  
G A A T C A A T G C A G A G G A T C C A A G T A A T A A C T T T A C T C C T T C C C C T G G T A G A T T A G A T T A T T A T C T C C C T C C  
T G C A G G T C C T G C T G T G C G A G T A G A T G G G G C T T G C T A C A G T G G T T A T G C G A T A C C T C T T A T T A T G A T T C C  
A T G A T T G C T A A G G T A A T C A C A A A A G G A A A G A A T C G A G A G G A A G C G A T A G C C A T T A T G A A A A G A G C T T T A A  
A A G A G T T C C A T A T T G G T G G G G T G C A T T C T A C A A T T C C T T T T C A T C A G T T C A T G T T G G A T A A T C C G A A G T T

TC TTC TTTCTGATTATGATATTAATTACGTGGACCAGCT TTTA GCGTCTGGTAGCACCTT TTTAAATTTA  
GCTGATGGCAGCTAACTATTTTT TTTAATTATG TAAA TCATGATTC AAGAACTTCCC TAAAATATTT TTTT  
GAAA GAAGTGTAGAAGTGTAAAGGCTGTT CAAA AAGGCAAAA GAAA AGAGATCTT CAAAAA TTT TTTCT  
TTTCTAAA TTTT GAAGGCAAATACAGCTGCTT CAAACAAAGAAA AAATAATCATCAAAATATAATC  
ATTC CCTCTGATAAGGTGA TTTA AGTTATG GAAA AAA GAAA AGATAC GAAA ACG ACCC TAGCTAAGGCTT  
CGGACGATC GAAA CAAAGCCTGGTATGTAGTTAATGCTGAAGGGAAGACCTTAGGGAGATTATCTTCAGA  
AGTTGCGAAGATCC TGAGAGGTAAGCATAAGGTGACT TTTACTC CTCACGTAGCGATGGGAGATGGTGT  
ATTGTGATCAATGCTGA GAAA GTGCG CAAA ACTGGCGCAAAAAGAGCTCA GAAA GTGTATCACTATTACA  
CAGGC TTTATTTT TG GGAT GCGAGAAGTTCCT CAAAAA ACATGATTGCGC GAAA GCCTGCTTATGTTAT  
CGAGCATGCTGT TAAA GGAAT GTTGCC TAAA ACAA ACTTTGGAAGACGTCAAAT GAAA TCTTTTA GAGTC  
AAAAA GGTAGTTC TTACGCACAGTATGAAGCTATCAAACCAATTGT TTTA GACGCGTAA CAAA GGGTAA  
CAAA TGACAAA GAAT ATGATACAA GAGT CTGTTGCAACAGGCAGAA GAAAGCAGGCTG TTTT TAGCGTTC  
GTCTTCGTTCTG GAAA TG GAAA AATTGACG TAAA TG GAAAGAC TTTA GAGCAATA TTTCCCTCTTGAAGT  
TCAAAGAGCAACTATCTTAGCTCCGCTCA GAAT GCTCGGTGATGTCAATAG TTTT GA CAAA ATTATCCGA  
GT AAGTGGAGGAG GGGT TCAAGGTCAGGTTATTGCT ACTCGATT GGG TTTA GCTAGAGCTGTTCTGCAAG  
AGAAA GAAGACA TAAA GCAAGAAT TGAAGGCTCAAGGCTTCTTGACTCGAGATCC TCGTAA GAAA GAGCG  
TAAA AAATACGGTCGTAAGAAA GCTCGTAAAGAG TTTT CAATTC TCCAACGATAAGCTATTGCTTGTCCA  
TATATTG GAGT GCG TTTT CAGAAA AGCCTTC TTTT AAAAGAAGGCT TTTT TATT TTTA GGAACGCCAAAA  
CAGCTTCTATAGGCGGTTACCTAATGAGCAGAATAGATTCCT TTTAAAGAAA GCCCTATTTT CTAGGAT  
TACTT TTTT TAC TTTT CCTATTT TTTT CGCAGCAT GAATGAATTC ATGCTCCGAGAT TTTT ATCATAACA  
TGTTTG CAAA TCCCGTGCTTG TTTT TTGAGGAAGATAAGTCCCTCTATAGGTAGAGACGAGAAA TCTT  
TTA CTGGAGAACAGTCTCTGTATTGATCTCTAGCATTTGCGAG GGATA TTTT TTCTGTGACTTGG TAAAG  
TAGTT GAATAT ACCC GAACAATCTACACCATTACGAGGAAGCTG TTTATGAAT GCACCGGCC ACCCAA  
ACGTACGGAGTATCTATCAATTGTTCTG CAAA GAAA C TAAA TCTCTTAGAGAGAAT GAAGAAT TTTAAA  
AAC GAAT CTC CAAA GTAGAGCAGAAA GCT CAAA CATAGTTACTTCTG GAAT TG GAAT TTTAATAATGCTAT  
GCTAGCAGGAGATAGGGACACTTGAT CAAA GTTATCTATGTGGAGCGGAGCGGCAAAAGGTAAGG GGATA  
TGCCAA GGATC TAAA AAAGCTTCTTGAGAGCAGACAACAGCATTAGGAGGCTGCAGTTGGGAAGAGAATA  
GAG GAATATTC TGTAGAGAGT CGCCAGGGTATGGCTTCCATATAGAA GAAA AGACTAGTTGAGAAT AGGC  
ATAGTGTGATGGTTATGGTTGCAT ATCC TTTT TCCAACAGTACTTGCCTCTCTATACCTTCAGCATTC  
GAT TAAA AGATCGCAAACAGGAGATAATAAGACTTGGTGCGGCATGGGAGAACCTCGGTAGAGACATCACA  
AAGAGGAC TAAA AAGAGGTTCTTAGTCTTGTGTAACGCGACTATACCAA GAAA TTTT TTTT CGTATTC  
TAGTCTTCATCATCGCAATCGCAGTTGCAACAGTCTC TTTT TTGATAGACAAGAGAAGCAGAAA GGCTAT  
CTAGGATACTCTG GAAT ACTTGTG GAGT GGGAGCATTAGCATCAATAGTGATGAGCT CAAA CTCTCTGT  
ATAATAATCCAGAACAGGTTGAG TTTT CTG CAAA TACG CAAA AATTC TATCTAGGAT CACTTCTAGAGTG  
TCATCTGATCGGC GAAT AAGTCTACAGAGCAT TTTA GGGCAGGAA GAAA ATCC TTGTTGTTCAATTGTAGA  
TGCTTGACAAGCTGGACAAATATACCGAGAAGTCAACCGATTAAGA ACTTCTTCATCAGAAA TGTCTAA  
CAGAAT AAC CAAA TAATTGGGGAAGTAGGA ACTAA GAAA CTC ATG TAAA AGCTTCGTT GGGT GACAGTT  
CTTGGGAAGCCATC TAAA ATAGCACTGTTCTCAGAACGAGATAG GAAA GAAA GTCGTGTAATAACGTAT  
CC TGTG GAATTC ATCTAGTT TTTT GTGCTAACTTCCAACCAATGTATCTGGAAGCAACTTCCCCTG  
GTCTAGATAAGACTTAA TTTT TTGGCTGAGCG GGGT ATC CAAA GAAA CCGCACCTTAAGCAAGTCTCCA  
GAACTAATATGCAGGAG GGAT AATTGAGATGCTAGTAAC CAAA ACT GGGT GCC TTTT CC GGATCC TGGGG  
CGCCATAATAATAA GAAA AAGAGG GGAT CGATCC ATATCATCC TAA TAAA CTATCTTGTAAAGCCGACAA  
TACT CAAA GAGGCCATA TAAA ATGTACAC GAGT TTTA TTTT TTTT CGAAACAGAAGTCGTA TAAA AATTT  
T CAAA TAAA AGAT TTTA ATTAG GAAA GGCTTTT TTTA TAAGAACC TTTT CGGTCAATATAGTTACATAGA  
TTT TTTT TGATACTAATGACAGGAT AGGGAT AGTGGAACTA CAAA CTAACAGCAAATTA CTCTTC  
GC GGGT GC GGATAC ACCC TATTGATTACAGCTA TTTT CAAA GTGTGT GGG CAAA TACTGGGCTG GGGT AT  
AGGAACGTG GAATTC TCGGTACTTCCCTTGTGCTATATC TAAA TT TTTAGGGAAT TTTT ATGTAGTGGCG  
GTTTCGAGGAACACCGCTGTTT ATTC AAAT CAAA ATGTATATTTT GGAT TGCTTC CAAA ATCAAAGTTA  
A TTTA TCC CCACTGGTGGCCGGACTGATCGCCCTAACCTT GAATTC TGCTGCTTACTTAGCT GAAA ATGT  
GCGTGC GG GGAT CAATGCGCTACCTGTTCAACAATGGGAGGCAGCAAAGTGTG GGGT ATACAGGACCA  
CAGATCTTCTTGCATATACTGT ATCC TCAAGTT TTTAAA AATATTC TTTCTTCTCTAAC GAATGAG CAAA  
TTTCTTTA ATCAAAGAGAGCAGCATTC TTATGGTAGTAG GAGT TCCT GAAT TAACAAAAGTAC TAAA GA  
CATTGTAGCTCGGGA ACTCAACCC TATGGAGATGTA TTTA ATCTGTGCAGGGC TTTACAAA ATAATGACC

TCTGCTT TTTT TTAT CAAACTAGATTATCAGAGAAG GAGT CTGCATGACTGTTGAAGT TAAAGA CAAAAC  
TGTAGCTGTGAA GGG TAAAGAGATCC TTTT CAACGTCTCTT TTTT TCTAGTCCCCGGGC GAAT CAC CAAA  
TTCATCGGGAGAAGT GGGT CTGG GAAA ACAACAAT TTTACGTTT CAAA GTAGGCTTA ACTC CTA TTTT CA  
GCGGTAGTA TTTT TGTCGTAGGAG ATCC TCCAGGT CAAATT TTTT AACAACCAGAGCTG TTTT CTCACAT  
GACAGTACT GGAT AATTGTGCGC ATCC TCAGATGATAGTCAAAAAACGTGGGGAGAGAGAAGCTAA GGAT  
AAGGCCTTAGATCTTCTTGGTATGCTGGAGCTCAGA GAATATGC ATCC AGCT ATCC TCATCAGTTATCTG  
GAGGGCAGAGACAGC GAGTAGCAATTGCTCGTGCTCTTGCTCTTGATATGAGAGCG ATTCTC CAAA ATGA  
GCCGACTTCTGC CAAA GATCC TT TTTT AGCCTCAAAG TTTT TTCAAATCGTTCTGTCTC TAAA AGAGCAG  
GGCATGACTATTGCGATCTCTACACATGATATGCT ATTC ATTAATCAATG CAAA GAT GAGT GTATCTTG  
TAGATAAGGGGCAAAT TATAGATGCTTACGATAGTCTGCACGACG ATCCTCAAGCAAATAGT CAAA TGAA  
GCAGTATC TTTT TCTGCAAGAAGGGCCACAG GGATCC GAT GAAT AAGATTATTC TG TTTT CAGAAA CTTC  
CACGGAAGAGGAGAGACTG CAAA TGTAG GAGT AGGCTCTCCTAATGATGAGAATAA TTTT ATCGGCTAACG  
AGTTTAAA GGACCC GC TATTGTATAGCT TTTT AGTAGAGCG ATTC GCGCATATGCAGAAGACCAGTCAAT  
TTT TGGAGAC GAAA TAGGTCCTCTAATCTTGATTAGGAAGAAGTTT CAAATC TTTT GCATAGTATTACGG  
AAAAGCTT TTTT AATCAGTTCC GGAT CAATCC CCAAAGTCATCGTAATCTCTCGGAACAATATCTGTTT  
TTCCCCA TAAAGCTAGTTCGTATGCGCCATCAATAAGAGCATCGAAGCG TTTT CAAATGA CAAA CCCCTC  
AAATACAGAGAAA AAGATTGGGGT GAACCAAG ACTC AACACGTTGCTGTTT CAGCTTCTAC ATCC AAAAAT  
TGAAA GAGATCTTGCATAGTTCTGT ATTC GCTA TTTT GATCTTACCAAATC TAAA GAAGCGGATT GAA  
TACGAAA AT TTTT AAAG GAGT ACGGCTTGATAGGAAGA TAAA AAT CAAA CTTGTTCACTCG TAAA CTTAC  
CGGGT CAAA GAAT AAGCTCCACCTCAGCAATCAA GGAT TGAATTC TCTAAG AAA GGCTTTT ATTGATT  
TCCTCATTGATATGTAGAGATGCTGTAAGGTCGTCTTCTAAG GAAT AGCTTGTCTGTAAGGACTAGAG  
GGAAA TAGGCTGTTAGAT TTTT GAAT CTACT TTTT ATCGTTACAGGACCTTCTCCTCTAGAAAA TCGTT  
GTGAAT GGAGACAT GAATT CAAA GTCCGGCTAAA GAGGTTAG TTTT GAGCGAACTC CAGGAGAGATAG GA  
AAGATTC CTGTAAT TAAA AGAGGTAG GAATATTTA CCAAGTTGCTG CAAA AGAGCAGGCTCTAGTCTCAT  
CGGAAA AAATA TTTT TAGCTTCTCCTTCAATAATAAAA AGATACAG GAGTCTTATT ATCCTGGTTAGGAGC  
GAGGCAA TTTT CATT GAGTTGATATT GAAT GAGATCGTT CACAT CAAA TCGT TAAA CCGATCC ACCTATA  
TTA TTTT CAGATAAAA AT TTTT CTTT GATAGATGGTCA TAAAAA ACTAATGGGGT GGAAGATAGCTTCCCTT  
CTATGCCGCTTGAGATAATAGAGAGAGACAG GAAT AGCCTGTTTT TTTT ATCTAAGCAAGAAA TTTT AGA  
CAGATCAAGAC GAAA TGTCGTAGGCCGATGCAAAATACATGAAGGTGGGCAAGAGGCTT TTTT AAAGAAG  
GAGCTATAGCGTTCTGGG GAAATTTT CCATTGTAATGATCCAT GAGT TTTT TCAGTCAGAGACA ACTCTT  
TATTC ATAACAAAACGGAAGTCTCCGGTAAGAGC ATCC GT TTTT AAA TCTAGAGGAGATATCTACAG TTTT  
CTCT TTTT TCCGGAGAG TAAA GAAGTT GAAAGGAAGCTTCACTG TTTT TCCAATATAACGGGATAGAAA  
AGGTC CAAA TGTTGTAATC GAAT GAGCCTATCC ACCGGAAGTTGTAGAAGTTCCCGGATGCTTGCACAG  
AGATATTATCTGCAGTCCAAGGAGCACTGGGATC TAAA GACGAGATCAGATATCTGGAAT GAGAATT CA  
AATTTT TTTT TAAGTGAGGAGATTC TGGATCC GTTA TAAA TAAT TTTT CTTT CAAA AGCAACGCC TTT  
CCCCATCA GAAT GAAGT GAAA AGCTAGAGCGCGTCA CAAA CAGTGGAGCAAA TTTT AGGGGAATA TAAA  
CTAAA GGAAGAGAGGA GAGT GTTCCATACAT TAAA AGAGAG GAAT TGGAAGGCTTCATCTCTTCACTAGC  
TCTACCAAAT TTTT CATGGATAAAA AA TTTT ATTATCTCCAGCAAT GAG CAAA CCTGATAGT CAAA GAAA  
AAGACGTGTT CAAA GAAA AATGCATCTTCCAGAGAAGATAGCTTGTACAAA TAAA AAGTGTGGAGCTA  
AACGTTT TTTT CAACGCTC GGAT AATGTATAGGCGCCCTCTCCAC TAAA TTGTAGGGCATA TAAA GGTC  
AGATAGTTGCAGGA GAGT CTTAATAGAGGGT TATCTAG TAAA GCCTCGCAAGAGAGCTGTGTATTC CGA  
TAT TTTT CAAA ATATCTAGAGTATAATAGGGGACTTCAAGTG GAGT GTTGA TTTT AATAGG TTTT AGGAA  
GAAGAGCTCGCAAATATGTGTGAGGCAAGAGC GAGT GTTGGATAT GAAATTC TGCACATG TTTT TGATT  
GTCCATAGAGAGT GTGCTATGGAT ATAGGAAGGAGAAGCTCCTCCTA GAAT GGCAGAGGAAGAAGACGC  
ATGACCGTAAGATGATC GGACAAA CGTATG GAAA TT CAAATAT TTTT TGTA GAAT GAAA AGGTTC GGAT  
CGAGGGT ATCTACA GAAACAAA AGGCAGGTTAGCTTGTAAAT GAAA AGTCTGATGCGCTCCA TTTT GAGAT  
GGAGAGAGGAAGT CAAA CTTCCGATA TAAA AAGATAGGCTTCTTGAGATCGGAT GGGCGTATCTAGAGGA  
GAGAGTTCAGAGAG AATTC GAGAAGTTATTGTAGGCTGTAAGAGCACAGAAGAGGCTCCGCTTGTGTGA  
TCAG GAATACGCGATCGCGTACGTAACCACGAAGT CAAA CCGATA CAAA ATTTT CTTCTGCAGTCA GAGT  
AATGAGAGTAGAGTCTT TTTT TTGATGAGCT CAAA CGGTTAGATTGATGAGAT TTTT TGTTGATAGGATT  
CGGTCTAAGGAAGGAGAGGCTA TAAA GAGCAAAAAA AGAGAAGCAGGAACAGAGGAAA GCTCAACATTAA  
GAACAAAATTGGGG GAAA GAGCTCCTTCTACAGCGACAGATCC TGGCACATCAT TTTT CAAA TAAGAGC  
TCGTATAAGTAGTTGTT CAGCGGTTTTT TTTT CAT TAAA ACCCG GAAA CC GAAA GGGT TAGAGCCGTTAATC

GT T T T C A T G G T T A T G G A T C C A A G T T C T G A A G T G A T A T C G C T G C G C T C T A T T T T A G A A A G A A G G A C T C C A G  
G A T C T A A G T G A T A A A G G G A C G G G G A A T T C A T G G A G A G A G A C T C A T C G A C A A A T A A A G A C C A G C C T G T T A A  
G G T C A A G G C T T T A G G A A A T C T G T A G A G C A G T A A G C G A G G A A G A G A T C C T T T T A C A A T G A T C T T T T C C G C A  
G C A A A T A T T T C A G A T T C G G A G T C G A T T C C T C G G A T G C G A A T T T T T T A G C C G C A A A G A A C C G A A C C A A G  
A T A G G T G T A G C T G T T C A A T T T C G C A T T G C A G T C C C G T T T C C T T A T T T A A T A C A G A A A G A A A C A G A T A T T T  
T C C C G A T T C A C T G G A A A G A A T T T A G G A A G C A G C G C C A A T A A A G C T A G A G G C A C T C C C A C G A G A A G A T A G  
T A G C C A A A T A T T T T A T A C C A T G G A G A A C G C T T C A T G A A T T C A C T T T T T A G C A A T T T T C T G A A A G G G A A G  
G T T A T G C G A G T T C T T C A A A A T T T C A G T A A G T A T A T G A G T C A G C G C A T C C T G T A T A G A A T A A G A G A G G G  
G A G C A G A T T T T A G A A A A A G C A G G G A C T T A G T A A G C T G A T C G A A A G A T G G T G T T G A T A T G A A G G T T C G C A A  
T G T T A T G A G A A G G C T T A T A G C C C T C C A A A T A T T T T A G A A T C A T A C C C T C T C T T T C T A A A A T A T C T A A A C A  
T T G A G A G G T T T C T C C A A T A G A A G C C A A A G C C A A A T T A G C A A G A T A G C A A A C A C T G G G A G G A G G G A G A G C A  
T T A T C A A A G T G T T C T G T G A T T A G G G A A A G A A C A T A C A C A T A A A A T G A A C T T G A A A T A G C T A C T T G G G A  
A A A T T T C T T C T T T A G G G A T T A A A A T G C T A A A A C C A A A T C A A A G A A T A A G A A G G T T A A G G C T C C T C C A A A  
C A A A T A G A T A A T A G C A T A G A G G T A A A G A A G A G A A G A A A G A G G G T A A A G C A A C T A G A G C T C C G T A A G T G  
A A G C T A T A A T T A A A A A G G T G G A G C T G G A G G C A A A A G A A G A T T T C A A A A G A A A G G A T C C A T G C A C T A C C A G  
C T A T A G T T G C T G C A A A A A A A G C T G C A G A T T T T C T T G G T G G G G A C T C T A G A G A G G A A T G C A T A G C A A C A A A A  
G A G A A T C C C G T A C A G A A G A G C A T A G G G A A G T A A T C G T G A A A C A A T A A A T A A A A G C C A T G G A A T G G C T G  
A A A C T A A A T A G T T G G G G T A G T T G A T A G G T A G A A T C T G T G T A A T A T A G A T C C A A G A T C C G C A A A C A A T A A  
T A A A G A T C A T G G G G C T A A C A A G A G T G A T A A C T A G A T A G C T A A T T A G T C T C T T T A A A G A A G C T T G A G T G A T  
T C C T G A A C A G A A G A T T T T A T T T A G C C C A T C T T C T A A A G A T T G T A G C A T C A G A A T A C C T G C C C A G C A G A A G  
A C A A A G A A A C T A C T G A C A A G A A C C A C T C C G A T A T T G C T A G T T G T T G A G T A A G C T G C T T C A A T A A T T G C C A  
A G A T C G G C G C C A A A T A A T C G G G A A A G T G G A G G A G T A A C C A C T C T T T C C A G T C T A A A C T A A T G A A T A G G T A  
T T G A G A A A G C C T G A G G A A G A A G A C C A A T A T A G G A A C A C A A C T G A A T A G T C C A T A A T A G C T T A G A A C G C A G  
G C T T C T T T A G A A G C C C C G T T G T G A T A A A G A A C T T T A G G A G C T T T T A G G A T A G A C A A A T A G A T G A A A T T G T  
T G C G A A C A G A A G A G A G A A G C T T T T T A A G A A A A G A C G G A G G G C G C A C A T A A T G A A G C T A T A A T A A A A A A C  
A G A T C T T A A A A A G A T T T T A A A C T A A A A A G A A G A T T T T T T A A T T A T A G T T T T T C A A A A T C A T C A A A A T A T T  
T T T A A T G C T G A G A T A A A C A A G A A A A G C G G A A A C T C C T T G C G A C A A A G A T T T T C T G C T C G A G C C C T C T T C C  
C T G A G G A T T T T T T A G G G G A G A T C C A T T C T T C C A T A C T A T C A A T C A G A A G A T T G T G A T T A G A T A A A G C T T G  
T A C C C A A T A G C T T A A G G A A A A T G G A A A G A A T A T G T C G T C T C A G A A T G T T T T T C T C C A G G A T G C A C A A C G  
A T A G G G A C C G C C A C A G G A G A G A T A G C G G T C T A T T T T T C T A G A T A A G A G T T T T T A G G C T C A T C A T A A A  
G C C A T G A A G A A A G C C T A G G G A T G C G A A A G C A T G G A T G G T T G A G A A C A A T A A A C A A C C T A C C T T G A G G A C  
C A A A A G A T T C G C T G T G T G C G A T A G C T T G T T C T G G A G A T T C C A T A T T C T G A A G A G A A A G G A T T G C T G T A  
G C A T G G G A A A A C T G C T C A T G A T G A T C T G C T G G T A C C G G T T G C G T C A T A T C G T G A T G A A G A A A G C G A C G T G  
A T C A A A A G G A A G C G C T T T T C C A A A C A A A C G C A G C A G A T A G G G G A A A G A T C G A T T C C T A G A T A A G G G A G  
A T A T T T A G G T A A A T G C T T C T C C A A A A T C C C T T G A C C A C A T C C T A C A T C A A C C A G A G A C G A T G A G C G G G A A  
A T A T G T A G C T T A G A A A G G A G A T T A G G G A G A A T C A C T T C C T T A T G A T A G A A A T G T C C A T C G C G A T C A A C G G  
C T T T A T T A T A A T C T T G G G C A A T G A C T T C C C A G G A A G T G T C T G A G G A C C G C A A A G T G T T C C G G G A T G A G T  
A G A A G C C G G T T T T C T G G A C A T A A T T A A G A G G T T C C T T A A T T T T C A T C C T A A A C A C C A T A A G T C G T T T C G  
G A T C G T T T C G T C A A G G A A G A A T C C A T G T A A A G T T C T T A A C A A A A A T C C A A A G C A A A A C T C G G A T A T T C T C  
T G A G T A A G A A T T C A A G A A G T A G T T G T T A T C A A A A A G G G T G G A C A G T C T T C G A C T T A G G A G A T T T T C T C T A  
A T T A G A G T A C A A T G C T T C T G A A T C G C A G C T T T T A T C A G G A T T T T T T T A A G T T C C T A G T T T C T T C G C A A G  
T T T T T A T A T T C T A A G A G C T C A A A A A G T G G A A C T G G G C T G C A T A A G C A A G A T C T A T C T T A T T G G T T T T C A T  
T C C A A T T A A A G A G G A T A T G C T G G C T G C C C T T T A G A G A C C T A T G A T A C G T G G A T A G C G A T T T C T A A T T A G G  
G G A G A C C G A A G C T T C G A T A G A A A G T A A G G A A A T C C T G C G G C G G G A G G A G A G C A G T T A T G G C T T G T T G C G C  
A T G T G T A T A C G G T T A C G A T G A G A C A A T T G T A G A G A G G A G A C T G C A G A A A A G T A G T G G C G G T C G C A G T A  
G A C T G C G T G C T T T T C A T A T A G C A G C A G C G A T C A C C A C A G C G G T C T C C G C A G T A T G G C T T C T T A T T A G G T  
T G A T T G C G T G T G C A A T T C A T A A C T A C T G T T C C T G C T A G T G A G A G A G T A A A C T T C T T C C C T A T C A C A G A  
A A G C C G T G C T G A A T G G T T C T C A T T A A T C C C A G T T T T A G G G C C A A T G G T A G T T G C A G C T G T T G T T A C T T T  
A A A G C T A G A G A G G A A G G T T A T G G A C A C A A A G A T T C T C T A G T G T G C G C T A T G C A G T C C C A T G G A T G C T A T  
T A G A T T C C C T T C G C A A A A A T C G A T C T G A G C T A A A G A T C G T G A T G G T C T A A T A A A A C A G T C T A A A A A G A C  
A A A G G G A A C G A A A T A A A A G A G G T A A A G C T T T T A A A G A T G G T A A G C T T C G A T T T A A A T G A T C C A G T A A G A  
A A T A C A G A C A A T C A T T A C A G A A A T A T C A A T C G C A T G C T C A A T A G T G C G A C T T G T G C T G C T G G C G G C A T A G  
G A T T G T T A A C A C C A G T G G T A T G C T C T C C A A T G G G A G C T T T C T G T C A A A C T C A A G G G C C T T C T A G T G C C G A



AGACTTAGGGCATCGTATTC AACATCAAATTGCGTGCAAAGGACCAGCTGCAGGATTCATTC TCTAAGT  
AACGAACGGATCATGCAAAAAGAGGCTGCAGTTCCTAGTGTTCCTCGAAGCCGTAGAAGCAACTTCAAAGA  
TATCTGCCTTCGCCCGCAAAAGAGGGAATAAA CCTTCAACTTGCGATACTGTGATGATGAGTTGCTTAAT  
TGGATGCA TTTCCAAAGTATGCGGGGCTATGCAAA TTGCCATTGTCTCCTGTGCTGTGAAAATTAGTCGC  
ATTGTGAGAACTATGACGCAGGCACATGCGCTCCGTGAAA CAATTC AAAGACAGTTAGCAGCACGAGCTA  
CAGATATGCGTTCTGCTTACTC CAAGCTCAAAGGCATTATAGCCATAAGAGCTCTTAATGAAGTAGAGAG  
GGGCCATC GAAAATTAA GAAA CAAAATGATCACAGCTCAAA TTGCAAATGC ACTC ATTACTGGCCTTC  
TGTGC TTTATTAGCTTCTGCGGTAATCGCAGCATT TTTCTTAGGTGCAGCAAGTGCTGGACTAGCAAGCG  
T TTTCCAAAGGTGCTTATGGGGAGGCATAGGAGCCTTAGCTGTGCGAGTCAAA GTCGGCATCG TTTCCG  
AATCTGCCAGCGCAACTA TAAA GTAGAAGCTGCGCGGTGTATTCAGCGAGGTGCTC TTTATGCGCTTGT  
CTTGA GAAAATGCAGCGATTCCC TAAA GAATTC CT TAAA GATGGTGTAGC GAAA AGTGTGGTTGCGATTC  
AAGCTGGGGAATC CAAAGATACAGGAGAGTTGGCTTGGGAAGAGATGCCGAGCATCACAGCTTG TTTAGG  
AAGAGAGGGAATAGATGCTCAGGCGTATTC TTTCTTTCTGTAAGTCC TTTAGATGCGCGTATAGAGTAA  
ACGG TTTCCGAAA AAA GAATTTTC TGCTCATAGCGGC GGACAA TGGTATAGTGCTCCC TAAAGC TTTAGA  
TCAGCT TTTAGGGAGATATATGAGCTATTC TTTT TTTCTGTC GAAA GCTTGCTG GGATAGAATTTA TAGAG  
TGTCCTGGAGATCC TGAAGCTCCTGTGATCATTTCAAATCACGGGTATGGCGCAAGTGCCGATCATCTTA  
CTTT TTTCCCAACCATGTGCGTGTGCGCCAACAAA CGTCCCACATGGGTCTTCCCTCATGGTATAGAACA  
GCTTCCCTACCAGTTGGGAGGGGACGAGCTTGG TTTCCATTGGATACCGTTCTT CAAAAAAATTGATT  
TC TTTCTCAGGAAA TC ACTCCAGATACGGATCG TTTA TATCAGCAGCTATTGGATGTAGAC CAAAAAAGC  
CTAAA CAGGCTTTAGAGGGTCTTATTCACGAGTTG GAAA GAGATCGATCGGAAGTGATTATTGGAGGTTT  
TAGTCAGGGAGCTATGATGACGACGCATCTGATGCT TTTCTTCTCGGCTTCTTATCGAGGTGC CAAAACA  
AACTCTGGAGCAGCCGTTCCGAATCAATCTTGGGAA GAAAATGCGTC TTTA TGTGG GAAA ACTC TTTATA  
TACAAAGTCATGGGTACGATGATCCTAT CAAA CCTA TTTCTTAGGGGAGCGGTTATATAAGGT TTTAAC  
AGCTTC TTTAAAAGCGGAGATGG TTTCT TTTCTATGGAGGACAT GAAA TTCCTGTTGTTATGATGCAAAAG  
ATACAG GAAAGCATCGCGCTATG GAGTCAGTCGACATAAGGCGGACAG GAGTTTTA GGTGT TTTTCGCAAC  
AGATTGAGGAGAGCATTAAAGGCGGGGCAAGTT CAAA CTTCCCTACAGATACAGTATATGG CAAAG GAGT  
TTCT TTTCCATATCC TTGATGCTGATCAGCGATTA CAAA CTCTTAAGCACAGATCTTCCAAAAAGCTCTG  
TCCGTCATGTCTCATCTTTA GAAGAAT TAGAGGCTGTTGCCAACAGTCTTTA GGAGCATCTTCGAGAA  
AGATAATTC AAAAG TTTCTTCTGGCCTCTTACCTTGATTACAAAACATAATAATCC GAGAT TTTCTCA  
GAAA ACATTGGGATTCAGGATTGTTAATCATCC TATAGTGCAGCAGATC ATTC AAAAGTAGGGCCG TTT  
CTTGCTACTTCAGCGAATCTATCCGGC TTTCTTCTGCAGTTTC TGCTGATGAGG TAAA ACAAGA TTTCC  
CGGAAGAAGATATCGTAATGAT TTTCCAGGAGAATGTTCTATAGGGTTG GAGTCTACAGTAATCG ATCC TGA  
GGAGC GAATTTA TCGTGAGGGTGCTATTTCTATTGCA GAAA TA GAAACTGTATTGGGGGCTCCATGT  
GCTAATCTGTCTAAGGAAC TAGGG TTTAGAGAAA AGATAGGTATCC ATGTTG TAAA AACTC CCGCAGATT  
TATGTAGT TTTCT CAAA TCTAGACCTCAT TTTAAGGGTGTTACAAA CCATCAGCCTC ATCC TCATACTTT  
TTA TTC TGTTC TAAGGCAGGC TTTA CGTCTCCTACACAAGAAA TCAT TTTCTG TTTA CGA CAAA TGCAAT  
ACAGAATATCCAATTC TTTCCAGT TTTCTAG GAGTGAGTTATGATAGT GGATATGCATTGTGATATGCTA  
TCTCA TAAA AACT TTTCTCTTCAGACCCAGCGGTACGAAGCTCTCCTGATCAATTAATAGA GGGTGGAG  
TGGGAT TGCAGGCCTGCGCCTTATTC ACAGAAT CACA GAAT GCACCACATTAGATGAACAAAACCAATT  
GTTCT TTTCTTTA ATAGAGCAAGATGAGCGACTG ACTC CACTATCTTACGAACCACAAGTA GAAA GCTCC  
AAA CAGGTAGTTGCTAGTATT GAAA ATGCTTCAGGTCTTGGCTCTGATGCTCAGCC TTTACAAGAACTAT  
TTCCGAAGCT CAAA TTGTTACATGAACAGGGCCCTTAGCCTATATAGGGCTTG CAAAGAAT CAAA CAAA  
TCGT CAAA GTGGTG GGAT TTTA GAGCC TAAACG CAAA TCCAGAGATGG GAAA AATCT CAAAGAAT TGTG  
CATGCTCTAGCT ATTC CAGTGGAT CTAGTCACTGCTCAGATCC TTTAGCGGAT GATAT TTTAGAT TTTA  
CTGC GGA TAAA ATGCCGGACATGTTGCTATTGGCTAGTCACTC CAAT TTTCCGCGGTT CAGGATATCGA  
GCGGA ACTTATTAGATGTGCATGC TAAA GAGATT CAAA CAAGGGAT GGGT GATTGGGCTGAATGGAGTG  
AACTAT CAAATAGGAGCATC CAAA GAGGATAT TAAA AAGCATATCGCTCATGCCCAA GAGTTAGGGATT  
TAGATAG TTTA GTATTAGGAACAGACTTTT TTTA TACTGAGGAA GAAA AGTT TTTCCCAATT TTTCCAC  
AGCAAAAGATC ACCC TAAA CTACACGC CAAA ATTAAGGAGGCTATTC CTATAGACAAGGCGCAATCTCTG  
CTAGAG GAAAGAGCTCAGCGATT CAAA AATCGGGT AG TTTCCGGCACAAA GAAA GTTGTCAATCACATTG  
CGTTCTAGT GAAA GTGTGCATAGGTC AAATCAACACTACCTGAA GGATAGTGAACAA CAAA ATCTAGCGG  
TCTGCTCAAAATATAATCATATTC TATGTGGTACAAGGGCAGACAAGT GAAA TTGTCTAGAGCCG CAAA  
TCGAAC TTAGA TTTA GCAAGGGGAT GAAA GCTATAGAAGTTGCTGTGGAGACAGA GAAATCTT GAGTGG

CTCGTTCAAAAACAAATACATGGTATTCGAGTCTTCAAGAGT CAGCTGGATACCTGCGTCTCGGCATTG  
TTCTTGCAATACCTCGGCCAAACGCTGACAGCGGTAATATTATGGGATATATCAAAGTAATTTTCCCA  
GGAAAAGGAGTAGAAGCTTCTTGATGAGCTATGATTCCTCTGGAGATGGAGAGCTTTTCAGCTACTCGAT  
ATTGTGTTCC TAAA GCTTGCTTACCAGTTTTTCCTCAAAGATGGCAGCAATCAATCGCTGACGATTAGA  
TAGAGAGGAAA GTACAGGATC CAAA GGATTAAGAAT AAGCCAGAATGTGCCATCTACAGGGTAAATGGGTG  
TAGAGAGCAGAGGTAGTCCGAAGCTCAAAGGAATCCCTTGGTGCCAAGGCTGCCCCACCCAATCCACGT  
CACCTCTTCTTAAGAGGTGTAGAGCTGTGTAAA TGTGGGAATGATGC GAAA GTCATGGAATGTAATTC  
CACATGCGCATGGTCATAGTAATAAGGGTTTTCAA TAGAACGAGCG CAAA CCCTTGCACATAGGTTCAA  
AGCATAAAAGGTCCAGAA GAAAGAAAAGGATTTTC TGGACGATACACAGCAAAAAACGGAGAGGCTAATA  
TCGCCAATAGTTGAGGCTCGGGTTC CAAAAGTTCAATAAGGATTTTC TGAAGAAGAAGAGGCTCGAAAAGA  
TAGCTTTTCAAAGTAGGGAATATCGCCAGCTTGTTTGTGTGTTCCCAAGCAGCTATTACATCTTCT  
GCAAGTAAAAGAGAGCCGTCCTCACTTAGCATCTTTACGAATACAAAAACGATAAAACCGCCCGTCTT  
CCGAAACAAAATAGGAGGAGACCAGAGCAGGGGTAAATCCAGAGAGCTTCTCTGAAGAGAGTAGCAA  
TAAA GCCTTGGACAAA GAAAATGAAAAGCATTTTC TCCTTTTC TGGAGAAA GAGAGCGAGGATCATCG  
TGAATGGCTATGATTAAGCCGATTC TGGAGGAGAAAAGGAGCATCCGACCGTTAGGAAGGCGATAATAC  
TAAA AAAGATAGAGCGAACATACA TAAAATATT CAAAAGTATTTTC TGTAGAATCAGAAGTTCAAACAAAT  
TGCCGGTTCCATTC TAGAATGTATAACTTCTTAGAGAGCGGAAGTATAATAAC TTTTCGGAGAAAA  
TACACAGTATTTTTCGCTGAAAAGAATGCTTTTTC TCGTATTTTCAAAGT GAGTTTCATTTA TGTAAAAG  
AGACATTA CAAA TATTGCAAATCC TTGTAGTTATT GGGTTCGGAGCTTTTCAA CTGCGCGTAATCTAAT  
TATGTTAGCGGCATGGCCTCATTGC TTTTCATTATCATGAACATT CAAATAT TAAA GCAAATCGTGTTA  
TTCCGATTTC GAAGTAAC TGCAGCGGATGTTTTC CGTGATAGGGCTGT TTTTC TTGCTTGAAT TGTGCGAGAG  
AATTC TGGGGGAAG GAGTCTACAAAAAAGTGATT CAAATTTTC TTGGTGCAGCACGC TTTTC TTTTC TAAT  
CCTGACACA ACTC CATCTCCATCTTAAGCCTTCTCCAGGAGATATCAGCCAAC TGCATATGAAGCTCTA  
TTCCGCCCTTCTCTTTCGGATTA TTTTC AGCATCAGTGATCACAACGATGATTGTGCAG CAAA TTGAT TTTTA  
AGGTA CAAA GTTGGCT GAAAAAACATTCGCGAGGACGGGTC CAAA GAT TGCCTCCGCATGCTCCGTTGC  
GCTTTTC TCAAAGCATAGACACCGTAATTT TTTTC TTTTC TAGGCAAATATGGACTC GTTGCTAACTTACCA  
GATGTCATGATGT TTTCCAAATTTGTCAAAGGGACGGCTCT CAAAT TAGCTTCTCCTTGTGTGGCTCTAG  
CCAAGTTTT TTTA TAATCGCTT GAA TAAA GAAGAAGCACACT TTTAATCGAT TTTAGGT TTTTCACAAAGA  
AAGCTTTATTTAAT TTTACGAATTAACACGAACCTGCTAGTATCC CTTGCTCTCGCTCCTCTTGCTACT  
AGGAAA CGGTGAGTTCCTTG TAAA AACTGGGGT TGC AAAGAAGGTTTC CAAA TAATTAAT TTTACGAATGA  
GAAGAGACAGGAAA GAAT TGTATGTT GAAA AAGCCTAATA GAAA CGATCCTTGTCTTGT GGGTCTGGGAA  
GAAGTATAAGCAGTGTG CAAAAA TCACAAGCTCTAAGTCTGCTGCCAT ACTC CTGAAGG GAAATTTAAG  
TTTTCTATAACAGCTTCGCCTGCCGAGGCTTCCACGGAAGG TTTTCACAAAAC TGTTCGCCAATCAG  
TGGATTCTTATACCTCAGAACAAAAAGAGGGATGAGT CGG TTTCTTATTACTAAA AATAAGGAACCTAT  
AGG GAAA CGCGCATTCGCAAGGCTAAGGCAAAAAGAAGAGCGCATCA TTTTCAGAGAAA CTAAGCCAGCAC  
GAATTTCAAGTGATGGATACAGAAGTATCGGGAGAAGATATACAGTCTTCACTAGATTATGAACAG TTTTC  
TTCTACAGAAGAAGACTACCGTGTGCA GAAA GAGGAAG ATTCATAA GAATCT GAAA ATTC TTAAC TTTC  
AAA TTGCGGC TAAA GT TTTCTT CAAA TCATAATGCTGGTCTTATGCTG GAGTAGCTCAATTGGCAGAGC  
ATTCGACAAAATAATCGAACGGTTGAGGGTTCAATTC TTTCTCCAGCATCTTT CAAA GGGGGGTGTGCA  
TAGCGGTCAATTGCATCGGACTGTAAA TCCGACTCCTTACGGATACGTTGGTTCAAATCCAGCCACCC  
AGGACCTCATAAAA ATTC TATCAGAAA TCGGTTG CAAA CGAAGCTTGGGT TCTCCAGGCTTTT TTTATG  
CTCTT TTTTCATCC AAGT TTTATTTAAA AAAGAAT TAGT CAAA ACTTCTAATTAATAG CAAA CT TTTATT  
CAAAA TAAA AACTTG GAAACAAT TAAAT GAGTGATTC TGACAAAATTATTAATGATTGTGGTTCGACTT  
TAATACA ACTGTT CATGGAGATCT TTTAGCTTCAAATCTGACTACGGAAGGGGACGTTACGG TAAA GAGT  
ATTTCCGCAAAA GAATCCT TTTCTGT GAAAAGAAA GGTTGATGT GAAT GAGAACGACATCATTGTTAACG  
GT TTTTACCGGTGCCGAGGATATGATCTGACA ACTC GAGGCAAAA TTTCAATCAATCTCAACGGTAATCG  
ACTTAGTAATGTCAAATGCCCGGA GAAA GACTCCCAACCAGTTCTTGCTAACTAT ATTCGTACTC CTGAA  
TACTA TTTCTGCTCATGCAAGATGGAGCAAGAAT C GAATG GAAA CGGGGCGAGAAGCTTCTCTAATCG  
GGCTTCGCGCTTGGTGTATCAATCGTCTCGTATTAAT GAGTTCATTCGT CAAA TATCG CAAAAA GAAA  
TAAA ACTAGGACGCAGGT GAAA TAAA TCTCTCAGGACTACAGGCTGCAATGCTTGC GAAA GGTGTG  
TACATTATCAACGTAG GAGTTGGGAAGCGATGG GGGT GGAATAAT GGATATGGAGGAGATTACTG TTTAG  
CGGTCCC TTTAG GAAA GAATACAGTGAGAGCTCTACA TTTA GTAGAGGAGGAT ACTATGCTTCTACTGC  
TGTAGGAACAGCAATTC ATATCA GAAA AGAGAGCACAA TCC TGACGGACCTT TTTCTTCTCAGATACA

GAAC TTATGAAGACACTTTTAGAGGTGCGTTACAAGGGCGGAGACTATGTGGACAAGTCCGCCTTGTCCA  
CTTTATATCAAAGAGTGCTCGTATACCCAGAGATAGGAGGATAACATGAAGAAA CCAGTATTTA CAGGGG  
GAGCTCCTATTCCTGGATAAGTACAGAAGAAGGAACGGGGGTAAA GATCAAACTTATGGATGCGCAA  
TGCCACCTTAAAGGTAGAGGGGATGCGACTATAGATGACACATTAACCAGTCGGATTTAAA GGTACG  
GGCCTACAATACATACAGATCTTGATCTGTGACTAGGAGGAGATGTAAA GGAGGTAGGACGGTCTTG  
GTGAAACCGTTCTAGAAGGAGATTTTAATATTAAGTGAATCAAGGACAAGTTCCCTCAGTTCACTAA TTT  
AAGCGATCCTCTCTCCGCGAGAGATGCGATTACTCAAATTATTATCGGGATAGATCTACACAAGCTTAT  
AACTGCGCGACCCACCCTAATGGTGCCTAGTAAA GGGAACAGGTTTATCGATTTA CGTATGCATAATA  
TTGACGACTCGGAGTCTTACACACCTATGTATCA GAATCGGTTCTATTGAAA GATAATGATCAAAAAA  
ATTATATCTGAAAAGTCCAGGCATCTATCAAGTAGCCTTTCAAATA TTTGGAAGTGGGGGATACC ACTCA  
GGTAATGAGGATCC AACGATCTTCTTAAGATTATACACCTCAGCCTATGAGTACACTAATC CAAA TACTG  
GAGATACAAGAGGATTTAATCCAGAGCATAACA GAATACCTCCCTGTATTC TATCTTTCTATTCTTC  
TATTGGGAATGAGCATCCTTTTA TACAAGTTTCAAAAATTCATGTCAATATTGCGTACTCAATGATT  
AACGTGACAAAGTTTCTCAAAGTCTTCTTATAAGGAGGCAGATTAATGACAACACCAGATAATAATAC  
TATTGATGTTTCTTTTCGACACAAA TACG CAAA AATGTAGCGACTACGGATTTA GCAGATGGAAA TAAG  
AGT AATGCGGTTACGATTACAGAAA CAGCAACAGCCAATTACGTGAATGTAACACAGGATTTA ACCAGTA  
GTACAGCCAACTT GAGTGTACACAAGATCTTATTGCTCAAGGAAA ATTGATCGTGACTAATCCGAAA TC  
GGATATCTCTCAAAGCGGTCTGTGAA CAAA GCAGATAACACGATAACTTATAATCCGTATAATAATGGG  
GGAGGAGAAGTTGCGTTTACGGACATCAACTCTCGTCAAGGGAAGCAATACGTTCCCTTATGGGCTCTATA  
AGAATGGAGCGCC TAAAATAAGTATGCGTT CAGCGCTATCC GGAGGCCACGTAGGATCTGGAGATACTAG  
AGGCTGGGAGCAGAAGTGC CAAAAGGATGCCTATACTCAGCAGAGAGAGGATTTA GAAGATAAGGCTGTG  
ACTTTTAGCCCTGCGAATAGAGG TAAA TTGTATCAAAGGCATCTCTGCGGCTCCCGT CAAA TTCCGTC  
TCTCCGTC TTTATGAGAAA AATGGAGACTGGCTAGATAATGGAGCAGGGGGACGTGTGATGCTCTATGT  
AAA CAC TAAA AATTCGCTGGGAAGACGATGCGACGCTTATTAGGAATAGCCGTATG TTTAGGGTCCACA  
TGGTATACAACAGTACCTATGTCAAAGTGCGCAGCAACATACTATGCAACTTCTT CAGGATTTTTC CAAT  
TGATTGTGGGAGAGC GAAACTTTCTGT TTTCTCTCTCTTGGAGTGTGGTTCGGCTACCTGTTGTTC  
TTAACGGAGCTCTTTCTATTTCACCGCTTAGCTTGC TTTA GTTAAGCGGTTCTTT TTTATCAAAACAA  
AATAAGAGATCTCAAATTGTAGACGGATCGGAAA GCTACAAGTATAGTACTGGGAAGAGCAAGTCGTTA  
ATAGGTTCAAG TAAAGAAA CTTGCAACAAGGTTAGAGGTC CCGAGGAGATGGAAGAGCGAGCCGAGTT  
GAATATTGGGAGACTACAAAGTAATCGCAGA ACTC GGACATGGAT TGTGGAGCCGAGATGTGCTTCCGG  
AACATCGATTCATTAAGAAGCGTTATATTC TCAAGATACTGCCTTCGGAAC TTTCTTTCAGAAA ATTT  
TATGCGAGTTTTT CAGGAAGTGAATGTTCAATTGGCTGCCATTCGTCATGCAAGCTTGGTGGCTATC GAA  
AATGTGTCGCGAGAAGGGATCGGTATCAAATTGTTACTGAA GAAA ATGGAGGACTA TTTCTCTTGC  
AGTACAAA TCTGGAAG GAAACTGTCTGAAGAAGAAGTAGTGACAAA ATTCAGCAACTGTGCGATGCACT  
AGAGCTTGTGCATAGTATTGGGTAGCCCATGGTCAGATTCATTTA CATTCCGGTGCACG TTTCTTTCTTT  
AATGGATAGCTAATATCTATCTTCCAGAAGTCGGC CAAACTTCCAAA CTCAGAGAACGCATGT TTTCCA  
CTATCATGCAGTCTGGATCAGCGCGAGAGAGTATTACACGTATTCGTGACTTGTGATG CAAAAGGCTCC  
TGAAGAACAAGAGGTC CAAAGTCGAGAGGCCGATGTTACTCCGTTGGTGTATTAGCTTATTA TTTATTA  
GTAGGATCTTTCTTTGGGATCTTTCCCTAAGCCTTCGC CAAA CATGCCTGATAGCTGGTATGATTGG  
ATGGGTTTATCTTAAGTTGTTA CAACAACAACGGGAGGCTCGCCC TAAATGTTTACGAGAGGC TTTAAG  
GAGAAA GACGTCAGGAGAACAGCTGCAGGTTACGCTTGACAGCTGTCCGAGCCTCTACGT GAAATG GAA  
ATAGAAGAC ACTCCTACAGAGTTGGGACCCCTTCGCTCTTATTC GGAAGGA GAAAGGCTGTGTGAAG  
TTAAGGAAGAGCAGCATGCT CAAA TATTAGTAGAGGCCAAGTCGATCGATGAGGCCGATGGTTACCCTGT  
AGATTCAGAGGAAGAGCTTGAGAGTAGCGAGGGATATGCGAACCC TCTTCAATCCCTGTTAGCAAGGGAG  
CCTGTAGT GAGT CGCTATGTAGAAGTG AAAAGAGAAGAGATTAAGCCGCAACCATTATTGACG GAAATGA  
TCTTCATTGAGGGAGGGGAGT TCTCTCGAGGAAGTGGGGATGGTCAACGAGATGAGTGCCTGTACACAA  
TATTAC TTTACCA GGGT TTTCTTGGAC ATTCATCC TGTTACCAATGAGCAG CAAA TCCGGTT TTTAGAA  
TGCGTAGGAAGTGAGCAAGACGAACACTACAATGAGCTCATTCG CAAAAA GATTCGAAATTC AACGTC  
GATCAGGCCGACTGATCATTGAGCCA GGGTATGCTAAGCATCC TGTTGTAGGAGTAACTTGGTATGGAGC  
TTCTTCTTATGCTTGTGGATAGGTAAGCGGTTGCCCTCAGAAGCTGAATGGGAGGTAGCAGCCTCAGGA  
GGAAA GCTAGGGT TCGGTAACCTTACTGGGGAA GAAA TAGA TAAA AGCAAAGCAA TTTCTTTA GTTCGG  
ATACTACTCCAGTTATGAGCTATCC TTCTAGTATACTGGGTCTTTATGATATGGCTGGCAATGTGTATGA  
ATGGTGCCAAGACTGGTATAGTTATGATT TTTATGAGAGTCTGCTTTAGAGCCAGATGCTCC TTTAGGG

CCTCCTCAAGGGGTCTACCGTGTGTTGCGAGGAGGATGTTGAAAAGTCTAAAAGATGATCTACGTTGTG  
CACATCGCCATCGAAATAATCC TGGGGCTATTAACAGTACCTACGGGTTTC GTTGTGCGAAAAGATGTAAA  
ATAAAA GGA CTGAGTATGGGTGCTGTATCTCGAGATGATTATATTGCTTTATGCACAGAAT TAGTGGAACA  
TGACCGACGCTATTATGCGCTCAATCAACCGACGATTTCTGATTACAGCTATGATATGAAAATGCGAGAG  
CTTCAA GAAATAGAA GTTCAGCATCCGGAATGGAAGGTTTCATGGTCTCCTACCATGTA CAAA GGGGATC  
GTCC TTCAGGACAGTTTCCTGTGGTTCCTCATTC TAGCCCCATGTTGTCTATAGCGAATGTATACTCATT  
GCAAGAGCTAGAGGAATTTT TTTCCGTACAGAAA AATTATTGGGGTACTCTCCTGGATATTC TTTAGAA  
CTCAAAAATTGATGGAAT TGCTGTGCGCCATTCGGTACGAGAAGCGATTG CAAA CTCAAGC CAAAAGT CGGG  
GGAATGGGTAAAAGGAGAAGATATTACAGCTAATGTCAGTACTATACGCTCTTTA CCTATGAGACTCCC  
TCAAGAGGCTCCCGAGGATCTAGAAGTGCAGGAGAAGTGTTTCTTTCCATATGAAGCG CAAA AAGAGCTC  
AATGCTTGTCAACGGGAACAAGG GAAACTGGAA CAACTAATCC TCGTAATGCAGCTGGAGGAACTCTTA  
AGCTTTTATCTTCTAAGGAAGCTGCTAAGCGTAAA TTAGACTTGTCTGTTTATGGGT TGATCACAGATCA  
AAAAAACGCTCACAT CAAAAAAATCTTCAGTTATGCTCTCAATGGGATT TTTCTGTTGCAGGGATGCCG  
AAA CAATGCCGTTTCGAGACAAGAGGTGGTAGAACGTATTCGAGAGATAGAGGAGATGCGCGCAGCGCTCC  
CGATGGCTATCGATG GAGTCGTCAT TAAAGTAGACAATATTGCACACCAGGATCGGCTAGG CAAA ACAG  
CAAACATTATCGTTGGGCGATAGCTTATAAAAATATGCTCCG GAAA GAGCAGAAA CGAT CAAA GAGGATATT  
GTCGTTCAAGTAGG GAAAACGGGTATTC TTA CTCCGTTGCCGAGT TAGCTCCTGTTTT TTTA TCTGGGA  
GCCGCGTGTCCAGAGCATCC TTATACAACCAGGATGAGATT GAAAAAAAAGATATTCGCATCGGAGATTC  
GGTGTATGTC CAAA AAGGAGGAGAGGTTATTC CCAAAATTGTTGGATTAA CAAA GCTAAGCGTTCATTA  
GAGAGCGAGCCTTG GAAAATGCCAAGCCTGTGTCTGTATGTCATGAACCTGTTGT TAAAGAGAAGGTGT  
CGGTGCGTTGTATCAATCCAC CAAATTCAGGGGGGATGCTAGAAAAGATCTGTTTCCAAA CAAGTAAGAG  
CGCTTTAAA CATAGATCA CAAA GGAGAGAAGGTCGTAAC TAAATTTATTCGAAGTAGGTCTCATTAGTTCT  
TGTTCCGATATA CAAA CTCTTACAGAAGAAGA CAAAAAA CAGGTCCTGGGTTTAAAGATCGTTCTATAC  
AGAA TTTATTGGCAAGCATTGCCGGAGCCAAAAGGTGGCATTAGATCGGCTTTTACGGCTCTTTC TAT  
TCCTCAAATGGGGAGCTCTGGTGCCATAGCTCTGGCAGACCAC CAAA GAACTCTGGACAAAGTAATCGAA  
GCTTC TTTAGATGAGCTGATGTCTATAGAGGGGAT TGGTCCTAAGGTAGCTGCATCGATCGTCCGTTCT  
TCTC GAAACATGAGAATAGAGAG GAAATTCGTCGGATGCAAGAGCTAG GAGTTCAGGTTCTTTCTAAGCA  
ATCCGATAAAGAGGCTCC TTTACAAG GAAAAGTG CAAATTCCTTACGGGGACTCTCCAACAGATGACGAGA  
ACGCAAGCAGAGGAGCGTATCCGCTCCCTAGGGGG GAAAGTGAGCTCTTCGGTATCGAAGAGCACATATG  
CCGTCATAGCGGGTAGCGAAGCTGGGGTAAA TTTGAAAAAGCTCAAGATTTAGGTTTAAGTACAAA GAA  
CGAGAGCAAATTATCAAGAATTC TTGACGCAAAATCGGTCTCCT GAAAACGAGT TTT TTTCTAAGAGACA  
GCCTAAGTTAACCGAGATTTTATATGTGAGAATATGGTATAATACTTCCTTCAAAAATAGTT TTTCTAGGAA  
AGTATGGC GAATCCGTCTACACCC CCAATCAATCATTC CGGCC TTTCTTTTCAAGGTTCGTTTAAGAGCTT  
CAAGTCAGCAATGTACGCAAGCCGACAAAGGGG ACCCTCAACC CAAAAGTCCAGAGTCCAGAGGCTTGAC  
CTCAAAT TTTCTACTCGGCGAGA TTTAATTGATGTTGTAGAG GAGTCTATAGAGACCCTAAGGGCAGC  
GAGCT TAAAAAACTTC GAATATATGAGATTGCTCTAAA GATTC TTACAATTATTGGAGCCGCGATTC TCT  
TCGCTGTTCTC CAAA TATGTTGCTCGGTGTACC TTTATGGATTC CTATTGTAACGTGTATCGGTGTAGG  
AAT TGCTTTTAGTATCGCCAAA GGATGCTTACA GAAAAGATGTCAGCAGATTC GAGAAGAATATCGTGCT  
CTACATCTCTATCATCGCTATCTACTTTCCAAACAAAGATTC CATTGATGGGACTCT CAAAAGT CGTTTCG  
ATATCCGT TTTTCGAAA AGCGGAAGAGAAATTACACGGGT TAGATCTTGATAAAAAGAGAGGCTAATCATCC  
ACTAGAAGCGGACAAGAGATATGATCAAACC GGGTTGGCTCATCAACGCTACCAGGTGGATGCAGCTCTT  
GGAATCTCTAGTAGCCAAGACGCTTCAAAGAGAGGGGTGCTCAGCAGG TAAAATCTGTTAAGGACGATG  
TTGT TTTAGGGGAT AAGGC GAGTACAGATCTGTACCCGATAGCGCAACAGGCTCTACAAGCAGCGGGGT  
AGGTTTC TCTGGCGCTGCAGG GAAA GAGT CAAA TTGGATCTAGCAAATC TTTATCCAGTCTG CAAA CG  
TG GGGT TCTCAAGTCGGCAAAGACTCTCACGAAGC TTTACAGCGATATCAAATGCGCTTTTAAAGTAGTC  
CCATCTTAGCTACGTGGTGTGGAGCTGGGT TTTCCACATCTGCTCAGGAT CAAA TCT TAAAAGGTAA GAA  
TGCTTTAGATATTGCTAGT GAAAATCATACAAAGATGCA GAATGCTATCAAATGTGTGCAGCTAG TTTCC  
GT TTTAGGCAAATGAGAAATTTGAAA GAGAAGATTGAT ACTCTAATCCAAAACAAAATCTTGATCAAG  
ACTCTCTAC GAAA ACTGTACCAAGACATT GAAA AAGCTATGCATAAGG CAAA TATCGAAGATG GGGTTTC  
CGCTTCTATACAGGCTC GGGT GCGTAAGGTCACACAAAATA TTTACGACAAGATTTTCAAGAGCTTCTT  
AATAA GAAA GCACCAT TAAAT GAAA GCGATC TTTCTAAAATGCAAAAAGGCATTAGTTCTGTTGCTAATC  
TTGTTGTCACACTCTTA GAAA GCCAGTTAGGAA TTTCCGGAGCAGACTTCTA TAAAAGAAGTCGAAGA GAG  
TATTTA CCGAGACTTGATCGATACTAT TTTA CAAATGGGAAGTGCGGCAGGAG GAGT GACACCATTAGTT

GATGGTGTACA TAAA GCTATTAGAGAAG GAAAAAC TTTA CGTAGCGAACTTAGCCGGGCTATGTC TTTAC  
ATCC AAGACAATC TTTC CTAG GGGT GCAATCTGCTGTAGAGAAGTTGCAAGCA TTTA TCCGAGATCC TAA  
GTGGGGAGCATCGGCAGTGCATACCTCTGCTGAAGAG ACTC TAGCGCAAAAACAGAAG CAAATTTCTGAT  
CTTACGCGC ATCC AAACGAGCCTAGCAGACTGGAGAGAACGTTACGGGCTA CAAA AAGAGACAAAAC TGA  
ATCACATTGTGTCTACGGAC CAAA TATCGAGAACAGAAGCT TTTC TAGATAACCC TAAAAACGTTGCTGA  
AGCATGTTCTCTGGAGCAAGCTGTTGCAGAGCTCAAAGATTGTGA GGATGCTAT GAAA GCAGATCTC ACT  
CATGTTGAGCAAAAAAT GAATCC TACAGAGATA GAGT CTGCAAGAGAA GAG TTTA AGCAGTTGATGGAAG  
AGCTAGCTGGT ATTC AAGAGCAGCTAGAACAGATCGCTCGACCTA TTTATGAAGAAG GGGT AAGCGG TAA  
ACGCTTCTACTTAATACAGTCTTCTCTC ATCC AGAAGCATTACGTAA GAAA GTTCAAGCAAAA GAAA CC  
TTGTTAGAGGC TTTA ACAAAGGGCGAACAGCCTTCTCCAACGAAGAA GAAA ACGTTGAAGCAGC TTTC TG  
AAGGAT GT GAGT ACTTCTCTAGTCTTGTAAAGCAAGATTAATGCGGTTAAGACAATATTAGAAGGTTCTAG  
AGGCAA GAAA ATTGCGTCCCAAGATATACGACAGCTGATT GGAT TGACTGATGAGCTTGCTC TAAA GTTG  
TCCTC TTTC CAACA GGATTCTTTA GA GAGCAAA CTCTAT GGAT TAGAG GGGT TAAGC ATTC CAGCTGCTT  
CTATAGAACAGAA GAAA GGAT CTCTAAGTCTTCTTCTATAGCAGAGAAGGTGGTGTATGCTTCTCATCA  
GCGTGTCTATAATG GGG TAAA AGC GAAA GTGAAT CGCACATTAGAAGCAT TTTC ACAGCTGATCAAAGGC  
CTACGA GGATC TTTA CGTAATGCGATGATCAC TAAA GCTGTTGTAGCGGCGATTC TCTCTGTAGCTT TTT  
CTGCTTAGCGATTGCGCTCTTCTCTGTGCAGCTTACATGGCTTCCTATTATGCTCTGCGT TTTA GC CAA  
AGTATTGGAAGCT ATCC CTTCTGC TTTATCTACAAA GGTGGAGAAA A GAAA CTG GAAA TATGAGGTTGCC  
TC TTTA GCGAAGCAGTTGG TTTC GGATGGAAGAAA GCTTCTT ATCCAGACAAA GGGGAT CAAAATATCA  
AGCATCTAGAGAAG ATTC GAGATG TTTATGGGCT GGATGGTGTGCGAAT TAC GGGT AGCTGAAGCAGC  
TTTA TTAGGAGT TCA GAAA CTCTGAAGAGCAAAAACAAGAAT CTTAAAAAAGTGCTGT TAAA GCATTG  
CGGGC GGATGCGAAGGTTCTTAATAA GAAATTTA AGAAGCTTCTT GAGTCATATCAGCCTCAAC ACTC TG  
AAGTCACAG GAGT CCAAGGTGTAACGGAACAAGAAA GCAGGGATGACGT CAAA GTAGCACAAAGATATGGC  
TGCCATAGAAGAGT TGCAAGACCAGTATCATGCAGCTTGCTTGCAA CAAAAGT CTGTGAGCATGCGATT  
TTA GCCGAACAGCG TAAA GCTAAG TTTC TG GAAA AGCTGTTAATTC AAAACGTCGAGATGTGTCCCATT  
TATCTCATCAAGAAGCTCATTATACTCAAGTAGTCAGTCA CAAAAA GAGCGCATCTCAATGAGAAA AGG  
AGCATCT ACTC AACACGCTTC TAAA GAAGAGAT TTTC TACAAAAATGAGAGAGCTGTTGTCTTTA GATGAT  
CAACTTC TAAA AGCTCATAACAGCTCAAGATGTGAAC TGGATAATAGCATAAA CGGTCAACTGCAACAGC  
AG TTTAAAAAAGTTATCTGAAGAAGGAAGCCTACAAAAG TAAA AGCTCTGCTAGAAC TAAA TATGTG TTT  
AGGTAATGCTGGGCAA ACCCTTTA TC ATTC AAGGC TAAA GAGAGAGGT TTTC GAAGCATCTTGCTCTAAC  
ACCTCAGCAACTCTTCAATACGGTGAAGATCTG CAAA CATCTTACGATGGAAGTGATCGATCGGCTC  
TTCTACGG CAAAT TTTA GGATCT GGATATGAGATGATCAGTGAGGCCAGCTCTGAGCTGAAGTCTCTACG  
CAAACGTTG GAAA AGAAGCGCTTCTCAAGCCGAATTGCTCCTGAAGATTATGA GAAA GTCTGCA GAGTG  
TTAGAACGT TTTC TAAA GCGCGAGACAGTCTGCTCCGAAGTTAGGCTTACCTCTTGTTAAGAGCTCAG  
ATGCTACCGTTGG TTTA CAACATCAAATACGAGATAATCAAC GAGT TAAAGCTC GAGT AACCGCTTGTTA  
CCAAGA GAGT TGCAGAAA TGT TTTA CAGCATTTA GAAGATT GGGT GCG GAAA ACGCGACAG GAGT CGGCA  
GAAT GTCAAAAAGTAGAAA CAAAATACGC GAGT TCTGCCAAAAGCC GGAT CTAAGGAGAATCTTGCTG  
AATCTACAGAGATGCTAT TTTC TAGCTTAGAAGAAGA CAAAAA TAAA ATACCTCTAGATGT CAAA CGTGC  
TAT TTTA CGATC TTTA TCTTC TAAA GTTCTTCATATTAG GGAT CAAAAGTTAGAACTT GAAA AGTTAGAA  
GAGCAG CAAACGAAGACAAATATTATTG TAAA AGCCAAGGAAGCT GAGTTCAGAAA GAATGGGGAAGTGT  
GGCATAATCAGTATCAGATGC TAAA AAGTCAGATGGAGAAGCTG GAGTCTCAGAAA AGAAGACTGACAGA  
TAA GAAA GAATAAAA AAAAGGAGGGCTGC TAAA GCCCCTTT TTTA GTTAGGATACAGATGTATAGAACAGA  
CTTG TTTA ATTAGCAT TTTC TGCAGCAAAAATACGAAGCAAATAA GAAA TTAGCTCATGCAACTT GAATG  
TGTGCGTTCTAT ATCC AATATAACGATCAGGAC GAAT GATAAA CAAGGATTCT GGGT TGGCGTGGTATAA  
CTTGTTGGAC TTTA GGATCC TCGGTGACAATCACGCTC ACCCATTC GCCATATTC TTCTAGAAGAGCGTGG  
ACTAGATCGGGACGTT CAAAAA AAGACAAGTAGATG TTTA GCATTT TTTAAG GAAT CTAATAGATAAT  
TCCAGTGTCTAACCGTATGTC TAAA GCTCGTATCC CGGTCTAGGGCCTT GGAT TTCTTTA TCATTAGG  
AGACAC TTTA AATAATATCACTAGCTTCATA TTTC GATGCGGGTGGGAG GGATAGTATAGCTCTCCTTCC  
GCAGCATCGAGCTGCTTAC ACCC CTTAAGGTAATAGTACATCAGGGCTG GAGTATACATG CAAAAA AAA  
GAAGCTTGGTAGCTCT TTTC TGATGGACCTCAT TAAA ATGAGGCAATACATGGCTCGTT TTTA GTTC CAA  
AGAAA GGATCAATTGGGAAGAAGCGGCTTT TTTA ATTACTGGCAGGAGCTTCC ACCC TAGAT TAAA AGCG  
TCAT GGATATTG GAA TTTACTC CCGACAGGTAA GAAA AGGATAGATTATTAGCAATGCTCCCCAA GAAA  
TATAACGGTCATGACAAAAGGAT ACTGTAGAAGAGATGAG GAAA TGGAGAGA GGATCCTCTGCTAGCGC

AAGGCTATAGGTATACAGAAGTTTATTTTAAATTTAAGAGAAAAGAGAGCCAGAGGTAACAAACGAGGTAT  
AGCTGACGAGAGCCTCTGTAAAGGGTTATAAAAAACAAAATTAACAAAGCTTCAAAATAACAGGGAGCAAGT  
GAATATGAGATTCCTCAAAGGCTCCCCCTCCTCACAACTACAAAAAGAGCTTCCTTATGGATTTTTCA  
AATCAAAACAAATGTCAAAAGGAGATCTTTAAGATCGGGATCAGCATCCATTTCAACAGCTATAATCCAT  
TTAGGAGTAAAGATCTCTCGTCTTCATAGACTTGTGAAGAGCTCCAAATGCTTTCATAAAATAGATTCT  
GCTCTACTTGGGTAACGCGCGTAGCCCAATTCACCACACCGCCTAACCCTTTCAAACTCTTCGAGTAA  
ATGGGTACCAATTCGTTATAAGAAAATAAATAAGAAAAGGGGCAACGAGAGGCTGATGATTGATTGAAC  
TAAAAAAGAACAGTACGTTGTTTCAGTGATAGCGAGCCCCAAAAATTTTTCGCCCTTTATCAAGTAAT  
CTCCAATAGATTGATATTATCAAGAAGTTCAAAAAGAGATGATGACAAAACACTACTGGCAGAGAGTGCAG  
GGGAGCGGAAGAGAGGCTGTTATGCTATCTCGAGAGTCTATTACTTTAATACGGGCTCTGTGCTGTTGC  
AAAATGCTAGCAAAGGATCAGTCCCGAGGGATTTGGCTCCCATGATTAACACATCGATCATTGTTATCCCA  
CAAGCAAAAATGTACTTTTCTCTCAGAGAAAACCTTACCTTGAAGGAGGGATAGAAAACCTACGCAAAATGC  
CTAGTGGAGAAGTATACTCGAGAAGCTTTTAAAAGGAATCTCGAGGATATAAAAACCTAGTGTGGCTAAT  
GGAAGAAGAAAGAGAGGCTGAACCCAGCCTCTCTACGAAAACAACTATTAAGAAGAAAATTGGAAATGC  
GTTAAGAATTTCTGCAAAACCTCTTGGCGATAAGGAGATAAAGCGAATTTTCATGGGGAGTTCGGGGTAAC  
TCCTTAGACAGCAACAAACGCTGGAGCAGCCCCAAAAAATAGGCGTTGGTGAGCCGTAAGAACTACGCGATC  
TTCTAGTCTTGTGGTGGAGAACGGGATTCCTTGGTAAAGGATAGCAGGAGGATGTGATCCTGAATA  
CCTAAGAAAGAAATCGATATCATCTCGACACAGCTTGAGGGGAAGTTGCAAAAATCCAAATGCTTTAATCCA  
CTTCACCCATATCCGAAAACCTGGGTCAATGGTTAGCCAATAGTAGCACAGATCTCCAAAAGAAAGGATGAC  
TCGTCAGCAATAGGAGCCCAGACGGAGATGGCTTGAACCGTATAGTCTCTAGGTCTATAGGTGCTAGCC  
AGATGAATGGTAGTGTGACAACCTAAGGAAACTCTGCAATACCAATGCGGTGAGGGTTGACTTCTGGGT  
ATTTAGCTACGGTGGCTAAGATATCTTCGCCGTTGCGCAGGTAGTTCTGTCAGGGACAAAATCACATAT  
TCCTTCGCTATTTCCACAGCCAGCCATATCGAATCTGGCTACAGCGATTCACAAAACCGTAAGAAGGCGG  
GCTAAGTCTCGATAGACCCATCCCTTCTGTACAAATTTTCGCGGAATCCATGGAAAAGATTACAGTAG  
GATATCCCTCCTAGAGGCATAGGAGTGGTTGGGGTATGGAACATACCAACTAAAATATATCCGCAGCTGAG  
AACATTAACACCACGGCAATGCTCTTGAAGACCTAATTCCTTATCATTGATAGTAATGTAGGTTTCAGGA  
ATAGAGGAAAACCCAGGCGCTTCAACAGGAGCTGCAAAACCACTCCAGATAAGAGTACACACAGGAAAG  
TAGCAAACCTTTTTATCTAGAAAAGCCCCTTATTTTTCCTAAAAGCTTCTAAAAGAAGCGTTGATTTCTG  
CATAATTCGATTCAAACAAGAAAAGATGGCAGAACATAATAAGGTAAATTTACTGGATAAAAACAACCTCTTC  
AAAACCTGGCATCAATAATTACAAAATCGTTTAAAGGTGAAGAGAAGAAGGATTTTATCAAAAAATCA  
TTTTCTCACCCTGTCATAAGTATGCGACCAGTATGTATAGTCTTATTAAAAAAGATATTGCTAGAAATTA  
GGTAAGATCTTGGTTCAGAAAGTAAAAGTAAAGTAAAGTAAAGTAAAGTAAAGTAAAGTAAAGTAAAGTAA  
TTATTCAAAAAATAGGTATAGCATGGGGCTCAATTTAGCATTTTCTTGAGAAAAGGTTTCATTCATGGCC  
AGCAAAAACCGCGAAAATATCAAAATGAAAAGTACCAAAAGTTCTGAAATGTATTGGACTGTTAAAATA  
AAAAAAAACAAGCGGTCGACTAGAACTTAAAAGTATGATAAAAAGTAAAGTAAAGTAAAGTAAAGTAAAGTAA  
AGAAGCTAAGTAGGCTTTTATCTAGCTTCTAAGATTCCTCAAGGGTGTGATGAAGTTAGAATATTATTAG  
CTTTAAGTATCTAATTCAAAAAGAAAGTAAAGTAAAGTAAAGTAAAGTAAAGTAAAGTAAAGTAAAGTAA  
CGTTGCTCTTGTTCAAAAGCTGTCCGTGGTTTCATGTCCGTGATCCACGGATGTCAGCAAAGATGGGTG  
GGAGACCTCGTAGTTTACATTCCTCTATTAGGATCGAACCTTCAGATAAGTACTATGAGTCTTACTACT  
ATCAAAATAGACTCTCACGCAGAAGCTTCGCAATATAATTTATAAAACTATAGGGGAGAAAACCTCTCTGTGA  
ACAGACGGATCCCTATGATCCGGATGTAGATTTTTAATTCCTCAGAAGCTTTTCGGATCCCAGGTTTTCG  
GATAACGGTGAGATGATAGATCCCTGTTTCGTACAGCCAATGAAAAGTAAAGTAAAGTAAAGTAAAGTAAAG  
AAGGCTCTCAAAATGAGCAAAAAGAAGGAATGGGACATGTGCACATGGATAGAGCTTTTCGGGGGCAAAA  
AGGAGAACCTCGAGCCTTATCTCAGTATATCGCGTATTCATCAGACATCCCTTTAACAACAGCGAGTGCCT  
CCTCAAAAGAAAACCGATTATTCGACTGAAGTGTGAATCGTTTAAATGCTTCTTCTGAAGGCTGGTTGG  
CGGATTTCTTGTCTTCAAGAGAAAATTCGAGGTATGTCCGTCACTCAAAACCTGTTGTATATCGCGACCA  
AGGGTATCGAGTGGGGATACAGCGTCTTGTCTGTCTTCTCTGTAAAAGAAAGGTTGAGGTCCGATTC  
CCAAAAGAGTAATCGGATTCATATAATCCCTGGTGTGTCTCCAAGAAAGAGACCATTTTTATTTGATA  
AGGAATGGGCTGCATCCATCCGCTCGGAATCCGAAGGGCTGGTATGCATAATGGCTGGCAGGTAATTCCT  
TCCTAGTGTCAAGATATCCCTGTCAATGAAAAGTAAAGTAAAGTAAAGTAAAGTAAAGTAAAGTAAAGTAA  
TCTTATGGGAAAATCTCTTCTTATATGATTATGAGTTTTTAAGCCTATCTTAGATCAGCTTCAAAGTG  
ATCAAGTCAAAATTTCAATCGTTTCCTTTTATTGTATTGATTGTTGCTCTAATATTGTGACTATGTC  
TATCCATTAGTGAATAAAGAAGAAGGAAATCGGCATCCGAAAAGCAATGGGTGTTTCCTTCTCTCGG

CTGCAATTGGTG CAAA GAT TATGTGGAGCTTGTT CAGGGCTAGTTGGAGCTCTATTG GGGT CGAT TTTAG  
CTGCATTA ACCC TAAA AAA TTTA G GGGT CAAA ACGCATTGGTTAAGCAAATTGCAAGGAAGAGAAGCT TT  
TAATCCATCC TTC CAAA GCGAACAACTC CCTCAAGAT TTTCACTTCCAACGTAA CAAATTTA TCATTA  
GGAGCGCTTGCTTAGCAGCTA TTTCCGGAGCAATCC CAGCACAGCATGTTGCACGCATGCAGG TTTCTG  
ACAT TTTAAAATCT GAGT AGAACTATGGTTATTC TTGTTGAGGC GAAA CATA TTTCGAAAAGTGATCCAGC  
AACAAAGATGTCTGTATTC CCATAT TAAA AGATGTATCC TTTCAATTACACGCAGGGGAAGTAGTGGCTAT  
TACAGGAGCTTCTGGTAGTGGCAAAAAGTTCGCTCTTACATCT TTTAGGT ACTC TAGACCAACC GAGT TCT  
GGGCAGATATTATTT CAAAGTAAA CAGGTCCGTCGTGAAGAACTC CCTATT TTTCGAAA CTGTAGGATAG  
GATTTA TTTTC CAAAATT TTTACAAA CTAGAAGATGATTC AGTGATTAACAACGT CAAA ATGCCTGCACA  
AATTGCAAGGAA GGAT ACTGGGCAGAAA TC TAAA GCTCGA GAAA GAGCTCTTGCCTTACTAGAATCC GTA  
GGGCTGGT GGAT CCGCGCGAT GAAA AAGG GAGT CTCTCTCTGGAGGA GAAA AACAAA GGGT AGCTATAG  
CGCGAGCTCTAATGAACG ATCC GGAGATTGTATTAGCAGACGAACCTTCTG GAAA TTTA GACCATCGGAC  
TGC GGAT ACAATTC ACGAACTGTTATTAGCTCTTGCAGAGAAGCATCGTGGGGT ATTGATTGTGACTCAT  
GATCGGGAAGTAGCT GAAA AGTGCCACCGAGAAGAGATTC TCCGCGATGGCACCTTAATGCAGCGACAGT  
AGACA CAAA AGACGGGAACCCCTCAGGTTCCCTT GAAA GACACGGTC ACCCCTAACTACCATCCGGGAAT  
GATTAGACGCTTCCGTCCCTT ACCC AAACATCTACACGCTCAGGCTATCACAAGAGC GAATAAGTTGTA  
AAGCATTC GTTATCAATAACCTGAAGATTT TTTAATAA TAAA GATAGCATCTT CACAGTTCGTTGTACGC  
GT GAGT GTACCAT GGGTATC TTTAAGAGGAGT TGTGCTAGATAC TTTCCGCTG GAAA CATGT TTTA GTC  
GCACCTCGTCTCC ATCC CCGAGGAAT TGATCTTGTGTAGTATTTA ACT TTTCAACAATCCACCACAACG  
CGTTGGT TAGTACGTGTTATCAAAGTACGCCTCT CAAA CATTTCCATAGAAA GATAGATAGGG GAAA CTA  
GCAAATTCGCTACC AAAAATTT CAAA TC GAAT AGGCAAGGACCC GAGGAAGCAATACGATTGG TTTAATA  
TTT CAAA CGAAGCATGTT CATTATTATCTACACAAAATA GAAA ACGATAGGGGT TGCCGAAGAACGTT  
TCTTAATGTTGGGAACAAATAAGGAAGCGTAGACCACGAAGCAACGTAAGGAGTACTGACTACAAGAGGA  
GAGTGGGCAGCTTCTAAGG TAAA CCAGGAAGAAGGAT TATCGATTC CTGATG TAAA TG TAGTACGTTCTC  
CTCGCTCATCTAC TTTA TGTTCC CAAA AGATAGACTCGAATCGCTTGTGAAGAGATTCCTCG TTTA TTAGA  
GAGCTCTGCAGCACCGATATTAG GAAA ATGGAGAGGAAGTAG TAAA TTC GTTATAGGTTGTAAAGAAACC  
TGGATAGGAACAGGTTCCAGGTGCACAC TTTCCGACCAATC TTTAAA GTC TAAA CGTTCGTCATGAACCG  
AAGGTAAGACCGTTCCCTCC TAAA AATACCGTATGAGAAGAAGACGTGGAGCTATAGCTG GAGTATCCAGA  
TTC TG TGCTGCT GGAT ACAGAACCT TTTAATAGAGAGT TGGCTGCTGCGGTTTC TAAGGAGATCTT CAAA  
CTATGTAG ATCC TCCACCTGTTCAAAGATAG CAAA AGCACTTG GAAA CCTATCC CTCCAAAAGTTGCTG  
ATGCAATATAGTGTGTTCC GAAT T CAAAATAAAA CGCTGACCAG GAAT CTGGAGAAT TGGCGCTTAG CAA  
AT TTTCAATCC AATTGCG GAAA CAACTATCTAATCGTT TTTCCAGAGGGGTTGAGCTGTCTATCTTC CAAA  
AGTGTGTATAGG GAAT GAGCGGCTGTGGAACATGTGACGGTATTC TTGGCATGTT GAGTGCTTTT TTTA  
CAAACCTCGCAGGTAAGACTTCC T GAAA AGGCGGCTGCTTCAGAAA GATCCAAATCAGAATCTTCGGAATG  
GGATGTGGATGAGAGGCTGCGATGCTTCGGA GAAA AA GAAAAGG CAAA TTTCTTTC AACAAAATAAATA  
TGATAGTC ATCC AAGCTGCGTT GAAA GCCTGACAAA AT TTTCTAATTACATAAGCTTGTCTGACAAAAG  
ATT GAAT CTTG GAAA TATCCATATCGATTAATACAGCTGCAATCGTATG GGATCC TACTTGAAT CTGGTA  
ATTGTACTTCGATTC TGT GAATCC TTGTAAGTCTAGACGGACGCTTCCCTCGGTGAGGACAAA GCT TTTA  
GCCCATGTCGCCATAAC ATTC CAAAGGCAAGCTTGTTAATCAAGATCTTAGCCTCTCT CAAA TATCGTT  
TAACAATATCGACTAG TTTAGGA GAGTAGCTTGG GAAT AAGTGTT CAAA AATAACACAAATTTCTT CAAA  
ACCAT TTTCTACTATGGGAGGGC CAAA AAGAGGCATAGTCGCCGCGAGGTCTGGTACAC TAAA AGTAACC  
GATGCAGAAAACCTTC GAG TAAA TGAAGTTG TTTCTTC GAAA ATGGAGGTACTGAT TTTCTACATCAAAG  
AAGG TTTAGAGAAT AGCTTAGTCCCTGGAGGAAT ACCAAAACGACC ATCCGCGCTCAGCTGAGCCG TTTCT  
TCTTG TAAAAGAGT AATCTAGAATATTC TCTTCGTTACGGT ATTC AGGATATTAATG GGGTCTAACAAA  
ACAATGTCAACAGCTCT ACCC AAAAAGTTCGACATTC GAAT CAATTC AATATCGTTATCGACTAGAGCAA  
CCTTAG GAGT TTTCT TTTCTGGAGAGAA GGATTC TCTGGTGATGCGATA TTTCCACACCGTCATGAGAGCT  
GCGTAATAACGCTTGCTTAA TTTCTTCTAGGAGCTCCGCATC GGAT TTTCCAAA TATAGAAGGGGCTACC  
AGGCAAGTGGCTGCGCAAGCTGAGAG CAAAGGT TCAA GAATAGTGAACAGAGCGCCGTC TTTA GTTGTCT  
CCCAAGAT AAAAATATAGGGGCTATTC GAAA TCGCGG TTTCCAT GAAA GAAGGTATATCGAAGATCTCCAG  
TGGCAA ACTCTCAATGAACGATGCTAGGCGGT TTTCTTCTCGATATAAGTATCT GAGTCTATAGAAA  
CGTCTAATCGT GGAT TAAA TACG GAAA AAGGTT GAAT AACGTATAA GAAA GAAGGCTTAGTCAT TAAA  
ACTC TCCGGGCTGGACAGTGATTGAC ACCCTATAATGGAAGGAACCTTGC TTTAAA GAAAAGCAAAGAAC  
TGATGAGGAGCTTAGCCTCTATTC AATCACTTCCCTATTAGGA GAGT CGATCACTG CAAACCG TAAA GGG

TTTA TAATGTGTGG CAAACTGTGCGT CAAATTTT CCTAATCC TATTTTC TCATAC GGATAGCTTGCTGGCT  
GGTACTCGGTTGTTGTCATCAGAATCTGTATCTTGTTGAGTAGGTCTACTTGAAGGAGTAGGGGCCGTA  
AGCACGCTCTCTGGGACAGATAGGAGCTA CAAATTTT TAGAAGAGACCAGACGTCCA TAAAAGCCTGAA  
GCTGTGTCTCTGTAATTGGGCGAA GGATGAATAGGTCTTCAAAGTT TTTAATCATAACCAGCACCGCTCCA  
GTTAGCAGAGCCAAAGATTGGAGT TTTATTGTGCGATGCAACAAATCTTGGTATGGA GAATGCCTTCTGTT  
TTTCTTTTC TAAA GAGGAAGTTGGATACCCAA CAAA CTAGTAG CAAA CATGTATCTTG CAAA GAATGGT  
TGTCGATGATTACT TTTACTCGAACTC CTCTTCGCATAGCTTGGGCAAGAGCTAAGAA GAATTC TGGGCT  
TAAGAAGATATACATCAAGACAAAAATACTGTCCGTTGCTTGGTTAATTGC ATTC AAAATCATT CAAAAT  
GCTGCATTAGGAAT CAAACGCT GGATAG GAATGTAATTGAGCAGCTGAGGTCCGACATGAACCAGTTGGG  
GTCTTTTCAGAAAAGACTGCGTCATGTAATTTCTGAAC TTTCTATACATGCCGTCACGTTGACATCGTGATT  
GAGAGACAAGTCCGTGTAGTTGGCTGATCCTGTAACTACTG CAAAGAAA TCAGCCAACATAGTTT TTTAT  
GTTGGA GGGTCTTCCGTTAGTCGGACGCAAGACGACTCTC GAGT CAAA ACATGCTACAGGTAAGC TTTTC  
TCCGCAATGGTACAAA ACTTCTACAGGAACATGGTGCGAAGTCT GAATTAGAGATT GGATAATGTCATCA  
GATGATATGGCG TAAA TGCGCA TAAA ATCCCTC CAAAAGCTTGGC GAATGGTATCGCAAATCATTCTTA  
GAGGAT TATTATTC TGCTGCTGATGTACGGAAT GAATGTAATCAACTCTC TTTTC TGCAAGT GGATGAGG  
CACAGGACGCTCTTGCAATTGAGG GAGT GCGCTTGATTGAGATCGCGTAACATGATGTCTTGATGATGAG  
GAATGCCGATGTGAGCGAGATTCGTGATGACGGGCACGTTCA GAGTGTCTGCTAGAGCGAGAACCCTGTTT  
TGGAAG ATTCGCGCTAGAT CAAAAGTGCCTAGAGCCTACCGTTTC AATGCGAGAG GGATGAAGAGG TTTTC  
TCCATGGCGATGGTAGCGGTGTCGGGAGGAGCTTCCAGTAG TTTCTCTTAGTGGA GAGTTCCGAGACTCG  
GACGATTGTGCGAAGGCTGTGAAGATCGATAAGCTCTT GAAA CCGACCGAGCTGTAGGAGATGATTC TGC  
AGAA GAATGGCGAGGT GAATGTGCGCGCGATGC GGATGAGAATAGCTAGA ACTCTTAGGATGTAAGTGG  
CTATGCCCTGATGAACCAT GAATGCTCATAATATAT TTTTACCTAA TTTATTAAGG TTTAGATGC TTTTC  
TCTGAGAAGGCAG GAAA CTTGCCTTCTC TTTTC GACTACAAA ACTCATTCTGTTACTGCTGTTCTGCTGAT  
GTGGAAGC ATTCCTTTCGCTT GAGTAGAAGAAGAGG CAAA CTTAGGGTCTGTTAT GGATTTTT TTTTC TCT  
TCTCATGTAACT GAATCAGCTC TTTA GTCATCAATCTACTG CAAATTTTCTATATATGCCCAAAGCTCGTT  
ATAGC ATTCGAGT TGTGTCTCTGTAAGC GGATGATAATCAAGA ACTCTTCCAGA TTTAATGTAAGACCT  
CCTCT ACTC CAGTTGAC GGATCC TATAAT GAGTGTGAGCTATCAATACAGCAGAC CAAAGTATGCAGAA  
TGCCCTTCGCATGTACGTTCTCGTAGGACAATGCCGTTAGCCTCGA GGATAGC CAAAACGCATAAGTCTCT  
TCGTA CAAA ACTTAGC GAATAGTAGGAT ACTTGTGCGAGCCT ACTCGCACCTCTCCTCGATCGTGTGCG  
AAA GCCCAGCGATATAGGTGTTGCG TAAAATAT TTTAGCCGTTAAGTTTACATCTT TTTCAAGAGAGGCCT  
CTGTATAG CAAA CTGTTCCCGTAACGACAATATTATGTTCTATAAGAA GGGTT TTTCTATG TAAAAGAGA  
AC ACCCTCTTCGAGGTC TAAA CTGCACA TTTCTTCACTACAGTGT CAAAAAA AAGCCCCA CAAAATAG  
TGTACGGAGACAGGCGCTCTATTAGAAGCCTCAGCTAAGGCTGCAA GAATTC TGGGGGATCCGATAT TAA  
ATACT TTTAATAGAACGCTGCGCTTAGCTTGTAGAA TGTTCACAAATCAT TTTACAGGTTCTGTTATT  
TCCAAA CTGATGAGCAGAGTAGAGT GGATCAGTTCGTGATGCTGTAAGAGTCTAGGTACGACTTGGCTC  
GAAGAAGATCGGGCTCG TTTAGAGGAGGAAGAAGAAGTGTCTTCGG GAGTCTTGTGT TTTCTCTTGGAGC  
CGGCAGCA CAAA CTGGGAGAT GGATACTGAAGAGGTAGAGGGT TGAGGGGAAGGACTTCTATCGTCTG  
TCTTGATCGTGATGATG GAATTC TCCATTCGAGA CAAATATTGCGAAGGAGT GGGGCGACGGTCTCA  
GGAGAAGAGATGTTACGGATGACGTA GAGTGGGAGCGAGGGT TCGTATAGACGCGAACAGGTTGTCTGT  
TCCTTCCATGATCGT ATTCATAGCAAACAACAGGAG GGGTCTAT GGGTTGCGATTC CCAAATAAA TTC  
ATCTATAGCCTG GGATACAGTATCTCTTGGTGAAGAG GGGTTTC GAGGCAAAG GGGTTTCAC GAATAGGT  
AGCGGAGAAGAACC GCGTGACGTA TAGAACCT GAAA CGCTCATTATT TTTAAC CAAAT TAAA TTAATTC  
GAACTAT TTTAGT CAAA TTGTTGCTT TTTCAATATAG TTTACAAA TAAAAACAAATACTTTA TTTTAA  
CAAAAAG TTTAAA ATGAATC TTTAATATCGAAT TAAA CAGGAGA ACTATTT TTTAATAAAAAGGCCCAT  
A TTTCTTGAATT GAATGGACAAACAAAGGTGTGAGT GGAGTCACTATGAGCAAGTCTTCAAGATT TTTAT  
GCATCC CATGGTAAGTCCAG CAAA GTGAGCCAAAAATCAGAG CAAA ATCATCGAT TAAA CAGATT CAAA  
ATGCAAA GAATCTACTGTTGTAACAGAT TTTAACAGTAGTAGAGCTGAG ATTC TGTGTAATATGTCTAGT  
GTATGGGCGCTCTCTTT TTTA TTGATTACGATAGTAATGGTT ACTCCTCGTAAGCGTGCTTGTCTAAGG  
C TAAA AAGATCTCG GGATGAGAGAAGAT ATTCATAGCAATT TTTA TAGTTCTCTGAGCTT CAAAAAT CTC  
TTGGATGATAGGCAAGGTCTTAGTATT GGATTGAG GAAAGGGAAGT GGGTAATAG GAAATGG CAAA CGAG  
CCGATA GAAA CTGAGCCTC GAGTACCGCTCAAAAT TAAA GAATATAGCGCC GGGT CAAAAT AAGAGCTG  
TTAGGTTGATGTC TTTAAAGAAA GAAGA TTTAGTGTAGTTAGCCGTTCTATAATTGTTAGCTGATTGTC  
AATCAGTGTGCT TTTCTTATGTAAGCAA CAAA GGATGCGCTCA ATTC CACATAGAGTTTGAATTC



CGATCCCAATTGGATAGATTAGGAAAGTTCCATGCTGAAACAATAACCGGAATGTTGCGACGAACGGCTC  
GAATTAATGCCC GAATAA TTTCAGGAGAACCAATAT TAAAAATTC TCATTGTGATTATTCGGTTAGCCTG  
TAGGATAGCATCGCATAGCATTCCAAACGGATCGTTGTGGCAAACTGAGT TGGTGGAAACACAATG  
GGTTCGGATCTGCAGCTAAAAGGTGCAGTATAGGTAA GGATCTGC CAAACTGATCACTTCTT CAAATCG  
TTTCAATCGC CAAATG TTTAGCC GAAT TAAA GATATCTGTTGCCGC TTTATCC GTACGAGCAAC TAAA GA  
AGAGTCT CAAAGAGAAG GAGTAT CAAAGATGTGTGAGGGGGGGGGGGGGGGTGGATCGAGCGCGACGGCGT  
CCTCGA GAATGAGAGACTACTTTTCATTTCAGATTC TTTAGGAGAATCTGTGGAAGAAGC GGGTTCGGAG  
GTTTAAA AAGATCGCTGTAT TTTAAA GAA GAAA AGCCTTGTA CACTCATAACATTAAGGTCTGGCTAGA  
AAAGAAA GAGACC TAAA TAAGAAA GATTATAAGATAATTGTCTTTTT TTTCTAAA AAGTTA GAAA AA GAA  
AAAAATCC TTTATAAAA CAAGAT GAGT TACTT TTTA TTC ATCGTCGTA TTTA TGTGTGCACGAGCTGACTT  
TTTTA TTTT TTTA GCTGTGACTTCGCGGCTTAGGGACATAGCTTGTTCACAAAAT TAAA GAAGGCA GAA  
AGCTGGCTAGGTGTGCGTTGAT GGAT GAAGATAAGGTCTTCTATATTGTATTGAAGACCTCGGACAGTCC  
AGTTCGCAGAACCTGTGATAAGGAGGTTGGTATCGAT TAAA CCGAC CAAACAATGGAG GAGTGCATTCTC  
TTCCACTACCACGTCACGAAG CAAA ACT CAAAAGT TGAGATCTTGCAAGGCATA GAATAGAACGGC TTTA  
TTGTGA GGGT TGACAAGCACCGTTACTTCAACCCCTCTCTGCGCCGCTTGATGAAGAGCGTGAAGGACCT  
CTTCGTGAGAGAGAACAAGCATAGCAACGCGGATGGTT TTTA CTGCAGATTGTACCGC TTTA ACACTTC  
ATCAACTCCTTGATGATTGTGGCAGTATAGACTACAGTATTC TA CAAA CTGCGAGCCACCGGTAATCCAG  
CCAGATTGTTGGGAGACGACCAATTGGCCAAGAGAT GGAT TGC GGAT GATAGCAACTAGGTTGATGTCAC  
GAGA GAAT GCGGCGTCAGAGAAA TTC GCGGAGCCTGTAATCACTAGGCTTCCGTC AACTACTATATT TTT  
ACAGTGTAGTCGCGCCTGGTTAGTAGC CAAAAA CAAA CACGTTA GGATGTC GAAT AAGGGCT CAAA GGCA  
GCAGATGTATTGATATTGTAAT GGATCCGTACGCCGTT ATTC GCTCGCTCTAGAAGAGCTGCAGCAATCT  
CTTCAGAAG TAAA CCTATAGACAAA TATA TAAA TATGGTAT CAAA CCTGCTTAATCGCTTGAA GAATAGC  
TCGAAGAGGAGATGGTCCAGATTC TGTAGAGAAGAGT TGTATAGCCTCTCCATG TAAA TT GAAA CATGGA  
GAGATGTTGGAAG GAGT TG TTTCTATAGCTTGGGT TGCAAAAAGAGT TCGTGTGTTAGCTTCTT TTTCTA  
AATCCCTCTATCTCTGGCAGTAGCTTGGGGAGAG ATTC TGGTTGTTGTAGAGCTGGAGGTTGAGGAGC  
GGCTTCT GGATAGGAA GAAA AGCCTTGTGTCCAGTTGTAGTGTAGGCTCTTGTACAACGGCAGGAGGA  
GCATACTCAAGATAGGGGGAT TGAACCC CATAA GGGTATGTAGCGTAAGGGTCTAATACAGCCTAAGGCT  
GTTGAGGCGCTGGAGG GAAA GAAG GAGTGAATGTCTCGAAGTGTAG GAAA CAGCTCCGG GAGTGAATTC  
TGGTGC GGTTGGAT T GAGTGTGGAACCGATATGCAGTCTTCTACAGCAGCAGCTAACTGATGCTGAGGA  
AGATCC TCAGGAGCAATGTAGTAAGCTCCCTGCATAGAA GGATCTTCGGGACCATCAGTTGGTTGAGATT  
CTGGAGGAG GAG TTTCTGTTCTCCGTAGGGAG GAAA ATTATTGTGAT TTTCTGTTAACGCTCATACTAAA  
AAAGAAGCTTTTT TTTGACGTC TAAA CGTTTGA GAC TAAATGTGCT CAAATT TTTAAA TAATAAAA AAAA  
TACGTTCT TTTACAAATTTA TAACGACCTAGATAAAA AAGAATGGATCTTTTTAAA GACCTTTA TGCTTC  
TATTATACAGACGTTAATTGGAAGC CAAA CGCTCTATTGTGAGA GAAA GAGGCAGAG GGATGGTCTGCCT  
CCGAGAGAACCTTAGAA GAAAAG TTTA TAAGA GGATCC GTTATTTA CT GAAA GATCAT ATCC TCTGATCCA  
CTGTTGTTCCACAAGAGCATG TAAA GAGA GAAA ACA TTTCTTTA GCTATATCTTGACAGATCAAGT TTT  
CTTCTTCTT GAGT GCTAGATGAG GAAA GCCACGTGCAACGATTGATAGCAAAAATACTTGCAAAGGGCGAG  
AA TTTCTTTCTGATCTAAGAGCGCGGAGCGTGTCTCCAATCGCGAGCATCTGCT GAAA GGATACGTTCC  
AAA TTTCTGGAGGAT GTGGTTCCAGAGAT ATCC TAGTAGAGATGTA ACTATAGCTGTAGAGAA TTTA GACG  
CAGCCTC TTTAGCG GAAATCCCTCGAGATAT CAAA CTTAGAAA GCC TTTA CAAGATAAGGACGAGACAG  
CTCAGGCTTGTCA TTTAGCTT GAGT AGTCGTTCT CAAA CTTCAATTGGCTATCGATCGCGCCTCTTCAGAA  
AGTCGATGAGGTTGCTCAGTCA TAAA AAT TTTCA TTTCTGTAGGGGGAGAGCTT TTTAAGCGCTCATCA  
TAAGTAGATGGAG GAGTAGGTTCT TTTAGAGGCTTCTAC TTTCCG TTTAGAAA CTCGCAG CAAA CTTAATT  
CCTGTT GAATTAATGT TTTATGATACGG GAATAGAGAAGAGAGT CAAA CTTCTAAA TCTGGAGTAGGCTC  
TTCAAGAATACATT GGATCCCTGTGAGA TAAA GAATGGGCTGAA GAGTCGCCGATTC TGCAGCAAGAGAC  
TCATTGT TTTCCAAAAA CTAATAG GAGTTTC GAATGAGGGGAATCT TTTAGCAAATCACC GGATTTTA  
CGAATAGATCCGGGCAATGG TAAA AGC TAAA TAGCTTGACAGACTC TTGACAGCTCTGTGC GAATAAA GA  
TGGATTCAATCGATAAGCTATAAGGGTATCAAGAGCACC TTTA CAAAAGG CAAA TCTTCGATTAA GAAA  
TC CAAA TAAGTGCTAGC GGATAGTACTTG TAAA CCATCTACGCCGT TTTTCGCAAGATAAGCG TTTA GCG  
CGATGTTATTAAGC ACCC CAAATTTA GCATTCT CAAA CCAATTC TCAAAAACAATACGGAAGGTAGTTC  
CAAA GAA GAATACACTGATTCGCCGTGT TTTATCACT GAAAC GAATAT TTTCAAGA TTTCTTCCATAATA  
GCATCACAATAGTCCGATACTTGGG GAAATGATCTCTATCTAC TAAA GGT TTTCTAGCCACGTAGATAT  
TCAAA TAGAGT GATAATGGGGGAGCGTTGTTCTTG GAAA GCGACCTTAGCCGCG TTTCTGCGT TTTA ACAA

AACGATCAAAAATAGTTCGTGTAGCAAAATAGGTCGTAAAAACAATAAGGCAATTAGCCCTCACAAAGC  
GAGCAAACACGTAATAGGTGCTGCGAGAATATTGCATACCACACAAA GAATGCGTTTACACACAAAGACA  
CCACCAAACTCTGAAA AACAGAGGAATCGTTTTC TCC TAAAGT TTTA ACAGATA CAAGAGACCCAAATCC  
TCGAATGATTGGATAGAGAAGAACGTTCCCTAAGCGCTCCAATGGGT CAGGGCCGAGCTCCGGCGCCAAG  
TATTTATCAAAATGTTACGATCATGAGTGTTTC TCTATTGCGGCAATAAAAAGG GAAAAGAGGTTAGGTA  
AGAGTGTTGTTGTTAAGCATTT TTTAATTTT TTTA GAATTT TTTA GAGGCGGG GAATGTA ACTC TTTAA  
GTTACAAACACAAAATAAGTTTTT TTTAGATGTT TTTAATTTAAA AAATCC TTAACAAAACAAA TTTCAA  
AGGTCCAAAATTGACCA GAATTT TTTAGTCAGAGGGCCTT GAAA TG CAAATGTCGTTTCGATAAA TCCCGTT  
GCAGAGCGGATGTCCCGATTTT CAAAAAGGACAG GAAAC TTTCTCTCCATTGTGTGGCAAGAGGGAT  
CAATGT TTTATATCGTGT GAAA CAAATCCCTAACTATCCTTCATGCTA TTTCTCACA TAAAGAGAT TTTTCG  
TGTTGTCGTCGTATTGCAAACATTGTGATCTGTATTC TCACAGGGCCTCTGATGTTATTGGCCACTGTGT  
TAGGAT TATTAGCGTATAGGT TTTCTCTACTTACCAGACTTC TTTA CAAGAACGC TTTTCGTTA TAAATA  
TGAACAAAAGCAAGC TTTAGATGAAT ACCGTGATAGGGAAGAAA AAGTCATTACGCTTCAGAAGT CAAAT  
AGAGGAT TTTCTAGTTAGAAATCA CAAACTCAACCAA GAAAC TTTAACAACGTGTAAGCAATGGGGGCAAA  
AACTATTAGAAGGAGAAA AATCCCAAGGGTCCCAGAAGGACGGTCTCTTGATATATA TTTCAAAAACAGTT  
TCCTTC TTTAGTAGAAAAC TTTCTATTCGAAGAAA AACTTCTCTG TTTACGAAATTTCTGTAGATTC AATG  
TGTCCTATAAAGAAAATCCACAAGC TTTGATGAGGCGATCAAAGA ACTCTTAT TTTCTATTTAAA GAAG  
TGCA TTTCCAGGGAT CAAATTTGTAGAAA CAGAGTCTCCAACAGACGA TTTCCCTTAGCCGTGAAA GTACA  
CAACTATTGGGTATGCCACGATACGATAATTTA CTTTATTTA TTC AAGAAGGAAA AGATGGCTCTCCA  
GAAGGGCGTATAGGACTGGTCGATCTA GAAA CTT TTTCTTGGTCTCCACATCCATGCCCGTAGAAGAAC  
TAGCTGTGATG TTTCTATGCA TAAAGAGCTTCTCATGACAGAGGC GAAAAAACTACAAATCC TTTCTC  
TACAAAGGAGGTCGAGCGTTCTGTAGA GAAA GGGCTTGCTTTT CAAA AACATATGCTAGGGCATCAAGAT  
TCAAATCCCAA AAAAGCGTAACGCCATTGCGTAATTGTGCCCTTATCTTCATCTAGAAGTATGGAGAT  
TCTCACT GAAAATT CAAAATAT TTTAAAAGCTGCTATTC AAC TAAATGGAGC ACTCAATGTTCTGTTATC  
TCCAGATATTCGAGAGCGGTTGAGTGCTA TTTCCGATAAGCAATGGTTGGCTATTAGTCCCAGGTTACG  
TCATCGTTACTCGAGCAAG TTTCTACAACATCTATCAGTCTCATACTGAAGAGGC TAAACGAG TAAATT  
CTTCAGGGACT TTTATCATGTGTCGATCTCCTATCTTCCG GAAAAGCATCTTCAT TAAAAATCTCCCAGA  
ATTAT TAAACAAGAAA TTGCAGTTGCTTCCAGAGGAGAAA GAAAATCAGCGAGGCGCTTGCTTCTCTATGT  
TTACGTGCAGTAATGGAAGAGCTAGTAGCAACAG GAAAATTTA TTC TTATGATTC TATGGATGATTTTC  
AAAAGGGCAGTATTGTGCGATTC GTTATTAGATCATCACTTGAGAGGT TTTCTCTA TTTTCGATACGATA  
TACTTT CAAAAGT TATGACGATATCC TCCACAACAACACCTTC TAAAAGTAGTCTTGT TTTTCAG TTTAG  
AGAAA CAAACAAAGAGCCTGTGAAGACGTATC GGGT TACATCTATAGCGTTGGTAGCTATTGGGCT CAAA  
CTGCTAATGATTAGTCTCTTGCTCCTATTGCTTAGGGTTCCTATGACTATGCCTTG CAAAGTTATAAGTA  
GTAGTTGTATGAGCTGTGGAGTAGTCTTGTGGATCCAAAATAGAGG GAATCTGT CAAAGCTAATCGAA  
CTTTCTC ATTC CAAAG ATTC TGGGCTGCTAATCC TATATTATCAGGTC GAAA TGGTTT TTTCTTCTGAA  
AACTCTTGCT TTTA TGGTAGATTC TCCGAACGT TTTCTATGCAGCATGTGTAATACTTCTTAATTAGAGGT  
AAGAGT AATGTGGACGGACATAC TTTCACTGCGAGATTACTATATCTACAACCACAATGACA CAAACG  
GTCGAAA GTATGATTC CTATCCACTAAGGT TTTA TT GAAATCC AGTTGATAAAA GAAGT TTTCTAAGCAA  
T GAAA TTC TATACTTACACTGC ATTCATGC CAAA GAATCTTCG GGATAGAGCAAGAGGAGAGT CGAAGAG  
AGCGAAGGCTTATGATAATTACCTCTGAAGCTTGATGTCTTGGATACAGCTGGGAAGCCTCACTGGA  
AAATCCCTGAAGGATTC TTGCAA CAAA CACAAA CTTATTACCGTTCTTGGGTAGAGCATTGGGTGAAAAA  
GTCTCTAAGAAGA GGATCTCTCATTCAGCTCCCTGCACGAAGCATTCAGGTGTGTTGATTACAACGCAA  
ACAGGATAC CAAA CTCCGCGAAGT AGACGAGGAGGGT TCCAAGTCTTCTATAGTA TTTACGGAT TAGAAG  
GGAAA GTGCAACCACACCAAGCTCCTGGAGATATGCTATGCGACATTACTGAAGACTAGTGTTAACGGTC  
AAAGATGTGGATGAAA GCGACTACCAACAGAAA CAA TTTA TGTGGT TTTAGA TTTA GCGACGGAAGAAG  
AGCGTAGGTTGCGAGCAGATAAGAACGTGATCC TTTCTGAGGGGGA GAATTC TAA GAAAAGAAA ATA  
AGGTAGCATATA TTTATGAAATGTTGTAATACTATAGCATTACAAAAGGTGCGATAT GAAAAATCAAGA  
GGAGTCTGGCTGGCAAGCT TTTCTGACATTATGCTC TAAAATGCAAAA GAAAAGTT TTTA CAAGACCTT  
TTTTCTGCTGTT CAAA TCT CAAA GCGAACG TAAA GATGTCGCTTCTCGCTATCATATC ATTCGAGCTCTTT  
TAGAAGGGGAGCTCACTCAAAGAGAGATAGCAGAGAAA TACGGAGT CAGTATCGCACAAATTACCAGAGG  
ATCTAATGCCCT TAAAGGATCAGATCC TCAA TTTAAA GAGTT TTTA CAAAAGAGATCTGATCTTCTCAA  
ATAAAA ATACAAATAAGATT GAAA GTA CAAATATGCACGCGTTGTTAATGAACAAAATATTC TGT TTTA GCA  
GTCAAAGTACGTAAGTATAGCTGCAGCATGCCATGCAATCAGCT TTTCAAGCTGATTGCTTCCAAGATA

TTCAAAAATTCATCC TCTTACAGCGTGCCTGGC TTTC CAAAAA GCTGGCGCTTATCTACTTGGCGATA  
GGCTAATTAAGAAGCCT TTTACAAA ATTAAGAGATGTTCTTATAGAAGTAAGAGCGTCTTT CAAA CGCA  
GGAT TATTC TGTCGCCAGTTT TTTC TATGAT TTTA ACACTATAAT TTTATGGA GAAA AGATGTTCAAACA  
TAAA CATCC CAAA GGGGAGCGTTCCTTCCC GAAGAACTATTAGCCCCTATAACA GAAT C TAAA AGCG GAA  
TGGGAGATTC TCAAAA ACTCAGCAAAGTTT TTTA TCTGAAGTAGATTGTAT CAAAAA AACTATGCGGGGA  
GACAAA CTCTCTGACTGAAGTTAA GAAT CAAA CTCGAGCTATTGATGGCCCTAGAGT A TTTCT T TAAA CG  
CGAAGATCT CAAA CATA CAGGAGCACA TAAA CT GAAT AATGCTCTTGGT CAGTG CAAA CTTGC TAAA TAT  
CTTGG GAAA ACACGTGTTGTAGCT GAAA CAGGTGCGGGACAACATG GAGT AGCAACAGCAACAGCGTGTG  
CTTATCTA GGAT TAGATTGTGTAGTATACATGGGAGCAAAGATGTGGAACGACA GAAA CCAAATGTAGA  
GAAA ATGCGCTT TTTA GGTGCTGAAGTCG TTTC TGTAACAAA GGAT CTTGTGGACT CAAAGATGCAGTT  
AATCAAGCTCTACAAGATTGGGCAACAACACTC A TTTACTC ACTATTGCTTAGGAT CGGCCTTAGGAC  
C TTTA CTT ATCC CGATATCGTTTCGATTT TTTC AGTCTGTTATAAGCGCTGAAGT GAAA GAGCAAATCCA  
TGCAGTTGCAGGAAGAG ATCC TGAT ATTC TGATTGCATGTATCGGAGGTGGCTCCAACGCTATT GGATT T  
TTC CATCAT TTTA TCC GAATCC AAAAGTCCAATTAATTGGAGT GGAAGGGGAGGACTGGGCA TTTC TT  
CAG GAAA ACATGCAGCACGT CAAA CAACAGGGCGACCTGGAGTATTC CACGGAT TTTATTC GTATCTTCT  
TCAAGATGACGATGGACAAGTATTACAAA ACTCACTC CA TTTC CGCT GGATTAGATT ATCC TTCAGTTGGG  
CCAGATCATGCC GAAA TGCAT GAGT CAGGACGAGCCT TTTA TACATTAGCCACCGATGAAGAGGCGTTAC  
GAGCTTT TTTC CTGCTTACTA GAAA TGAGGGGAT TATTC CTGCATTG GAGT CTTACATGCTCTCGCACA  
TTTAG TTTC GATTGCTCCTTCTCTACCAAAGGAACAAATCGTCATCGTTAACTTATCTGGAAGAGGTGAT  
AAGGAT CTTCCACAAATC ATCC GCA GAAA CAGAG GAA TTTA T GAG TAAA TTA ACC AAGTT TTTAAA CAA  
ACTAAGCCATGTATTGGCTATCTAACCGCTGGTGATGGCGGTACTAGTTATACTATTGAGGCGGCAAAAG  
CTCTG ATTC AAGGAGGTGTTGAT ATTC TGAACTA GGATTTTC CTT TTTC TGATCC TGTTCAGATA ATCC  
AGAAA TTC AAGTATCTCATGATCGGGC TTTA GCA GAAA ATCTGACGTCAGAAA C CAAA TTAGAGATCGTA  
GAAGGT ATCC GAGCT TTTA ATCAAGAAGTCCCATGATCTTATATAGCTACTACA ATCC GCTTCTACAAA  
GGGACTTAGATTATCTACGCAGAC TAAA AGACGCGG GAATAAA TGGTGTGTGCGTTATAGATCTTCCAGC  
ACC TTTA TCACACGGA GAAAAATCTCCATTT CAAA AAGATCT TTTA GCTGTAGGATT GGATCC TAT CAAA  
CTTA TTTC TG CAGGACAACGCCGGAAC GGAT GTC TTTA ATACAAGAATACGCAAGAGGCTTTTC TGTATT  
ATATCC CATATGAAGCTACGAGAG ATTC TGAAGTAGGTATCAAAGA GAATTTTC GAAA AGTCAGAGAACA  
T CAAA ATCTTCCAATTGTAGATAGAAGAGATA CAAA TGATAAAA AAAGAAGCTGCACATGTGCT GAAT TAT  
TCAGATGG TTTC ATTGT GAAA ACAGCG CAAA TTCATCAAACAACAAT GGATTC TTCGGTAGAGACTC TGA  
CTGCAC TTGCACAAACAGTT ATTC CTGGATAA TTTA TGAATAT GAATATGAAGCCCAGGCATCGATATCT  
GGCTTCATAGTTGTCTGTATAGATTAGAAGATAACA ACTC TCCTA ATTC AACATAA TAAA TATTATCAG  
ACCT CAAA TTT TTTATAAAA AAGCCCTTACGAGGCTTCTCT TTTC GAACAAAAC TTGCT TAAA AGAATAT  
GCGACAGTACCGTC ACTC TTGATAGTCTTG CATG GAAT CATATCC CAAA ATGAGC TTTACAAA ACCCAT  
AG ATTC ATGAGACCGTCAAAAAGATCTTCAACAAGA TTTC GTGTGCATCGTGCTC GAAA CT CATCTTCGG  
ACATTGAACAAT TTTC TGG TTCT TAAA CAAAATAACG ATTC TTGA TAAA TAATCTCGTTGATCAAAGC  
TTCTAATAATACAGATT TTTC GAAA ATTGGAGAACGCATAAGCACTATATCTCCAACAGTGACTTGATTG  
GATAACGTCATTGCTTGCCTCGGCTTCGAGCTGTT CAAA CAACAAAGC CAAA CATACT GGACAAA CTAGTT  
CAAA TAA TAAA GGTGCCCCAAATTC CATGTTATAATCAGATATATAATT ATTC TCGTCTATAGAAT AACC  
TTCCACAT TTTA AGTTGTCGTT C GAATATAAAA AAGAACC GTT G TTTC T GAAA ACTT CAAA AGT AAGAAA  
GGAT TTTATTTA ACTGAAGTAGTCTT CAAA CCAA GAAA AACATGCTGGTT TTTA CAAACAGTGTGTGA  
TAATTC ATTTTC TCAACCAAATTC GGTAGAGGT TTTAAG TAAA ATAGTCT ACCC CCCCCCTATTGCTA  
GATTGACAACACATGCTCCCTC ACCC ATTACTACGGTTT TTTC TACAACAG TTTA TTG TAAA TAAGATC  
TTCTAATAGATTTT CAAA TTTTC GAATAACTGAGG GAAATATCC TAAA CAAAATAGCCGGAGCATGTCT  
AAGATGGCTTGATCAAATTGT CAAA GATTTTC TCTGATAAGAGATATGCCAGACTGAGCAGAAGT TACT T  
TTACAAA AGAGGCC ATCC CCCTATTACAGCAAATCTCAGAAGATTC CCAGCGGCTTCTAGTCTATCAGGT  
AGCGCACCTGATTGTGA TTTA TC GAAA AAAATAAGCA TTTA C ACCC CC TTTA T GAAA AAAATGCCAGCA  
TCC TATAGAGAGGTT GAATAATTGTTAAGGTT TTTC TTTTTT TTTA TTGGTAACA GAAA AACAGT CAAA G  
CTT CAAA CTATGGTT CAAA TACAATCC CCTGGCCAGGTAATTGACGTTATT GAAA GTACTACAACATTA  
CAAAA ATTG CAAA CT GAAA CTCTATGCATCACAGGAAGTT TTTA GCAG TTTC CATTGC TTTC GTAAG TTTA  
GCT CAAA GGCTAACATCTTGTTATCATCAAAAAGAAGAACC AAAAGATGT CAAA C GGATTGCGATCTGTC  
ATGATCC AATGTC TTTA GATCC GCGTCAGGTTTT TTTA AGCAAAGATG TTTC TATTG TAAA AGCTCTCTA  
TGAA GGGT TAGTCCGG GAAA AAGAAGCTGCGTTCAGCTAGC CAAA GCAGAAA GATATCATCAATCTGAT

GATGGTTGTGTTTA TACTTTT TTTCTAAAAAATAC ATTCTGGAGCAACGGAGATGTTGTAACAGCATATG  
AT CAAAAGAGT CTAT TAAACAAA PTTATTTT CGA GAAATTGATA ACCCTTCGTTACGCTCTCTTGCATT  
AAT TAAA AATTC TCATGCTGT TTTAACAGGAGCTCTCCCTGTTGAAGA TTTA GGTGTTAGAGC CAAA AAT  
GC GAAA ACTCTAGAAA TTGT TTTAGAAA ACCCG TTTCTTAT TTTCTAGAGATATTGGCGC ACCCGGTTT  
TTTA FCCGGTGCACACCTC TTTA CGAGAATATTACAAAGATAAGCGTAACAAACGCGT TTTCCGATGAT  
TTC TAATGGTCCT CAAA CGATTC CAATGTTATGAGCCGCAAAGATA TTTACTAATCAACAAAA ACCCTCTG  
TATCATGCCAAGCACGATGTTCTGT TAAATTC GGTATG CAAA CAGATAGTTCCTGAT ATCC ATACAGCTA  
TGCAGTT ATTC CAAAAAATCATATCGA TTTA GTTGGGT ACCCTGGAGCTCCTCCT TTTCTTTA GAAGA  
ACAAA GAAATCTCCCTAGAGAAA AATTA CAAA ATTATCCTGTATT GAGTTGCTCTGT TTTA TTC TGTAAC  
ATTC ATCAACACC PTTAAATAATCC TTCGCTGAGAACAGCCCTCTC TTTA GCAATCAATCGAGAAA CT  
TAT TAAA ACTAGCAGG TAAA GGTGTAGCGCTACGAGC CAAA TTC ACCCACAAATTATCTCAGATACCTGC  
TACTAC CAAATCTCAAGATGAGC GGAT TGC TTTA GCAAAGGCTACTTGACCGAAGC TTTAAA GAC TTTA  
TCTCAAGAAGA TTTAGAAA AAAATTACATTAAT TTTA TCC TATA GAAT CTG CAAA CTACGAGCCGTTGTTT  
AAGAAA TTC GCCAACAAATTA CAAA ATGTACTGGGA TTTAAA ATTC TACATTA GGAT TAGAAT ATCATTG  
TTT TTTA GACAAACGTTCCAGAGGA GAATTC TCCTTAGCAACTGGTAATTGGAT TGCAGACTATCATCAA  
GCTAGTGC TTTCTGTCTGTCTAGTAATGGGACAAGATA TAAA GAC TTTCAATTGATTA ACTGGCAGA  
ACAAAAGTACACAAATATAGTTGCTCAACTTCTG ATTC AAGAAT CAAGCGACCTACAGCTTATGGCAGA  
GCAGTTGTTGCT TAAAGAAA GTCCCTT ATTC CTCTATACCACCTCGATTATGTGTATGC GAAA CAGCCT  
C GGGT GTCTGATCTCCAAACCTCTTCTCTTGGAGAAA TTGA TTTAAA AAGAGT TTTCAATTAGCTGAAGGAT  
AGACGTCCCAAGATAGCAACGAGATGTATTAT CAAA TTTCTGTGCTAACACAAGCAGACAAGCAATAGC  
GCAAAAGGCTGCAGCTGAAGCCATAGGCATTGTGAT GAAACCTAATA GAAA TAGCTTCGTAGAGCAAGAT  
AC TTTA CCGCAAATATCGA GAGT CATCC CAGGTA TTTCTGCAAGCACACTTGA TAAA TAGCAATGCCGA  
AACCAACAAGAGCCAATGGAAGCGTATATATCTTAATT GAAA TATCTTACGATATGCGGCAATACCTAG  
AAT TACAAC TAAAG GAAA CAAGCAG ATTC CAAA GTAATAGCAAAGAAGACATGGCTCTAC ATTC GAATA  
TAGCTGTAATAAAA CACTCATAAGCGTTCCTATACAA GAAAACAGCCAAGCAAGATA TAAA CAATAAGAAC  
GTAAGTG CAAAATCACC GGACTTCTCTTCTATCGCTTGTAGATGACGCAGTT GAGTAATC ACTCTCTCG  
ATCTCATCAAAGTG GGAT CTTCAATAAGATAATCTCCTACGACTGCAGTAGGTGTTGCAAGTTGCCAC  
CCATGACAAAAGATCC ATAGATATTGTTCTT TTTA AGCTGCTCCG TAAATC CAAA GAATTTA TGCAGT  
TAT TAAA CCAAAGGAT TAATTTCTCTTCCGGAAT GCGTAGGGAT CT TTTCTGCTAAT CAAA CAAGTACT  
TCAG GAGTTGCCAGTGTGATCC TTTCTTTTT TTTA TATGTGAGAATTCTGTG GAAA ATTC CATATATG  
CTTCTGGATCTGGACGCTTCGGAT CGTGATGG TAAA CGCACAGTAATGCTTGTGCAGCAGGCATTGAGCC  
AC GAA TAAA ACATACAGGAAC TAAA GTCAGAGAAGCTTACCAGTGTCAACAAAATGTTTTTTA ATCAA  
G GAAA TACTTCCGAA GAAA ACTCTTACAGGCAGAACAAAGATGGTCTTCAAAAACGGTGATATTAATAG  
GTGCATAAGGATCC CCTATCGTAGG GAAA TAC CAAA CTGTGGTTG GAATATGCGTC CAAAGTGGCATAAT  
CGAACGTTAGTGTATCATTAA TCC TACACACAAAACAAATCC TAGTGCCGTAGAAA TAATAAGGATC  
TTC TTTCTCAAGG GAGT TCTCGTATCCATCC TTCGTTAAGGAT TGAGATAAGACAAAAATAAAA AAAAC  
GAAA CCGT TTTCTTGCT GAAATAAA AGAAGCTTC TTTA TAAAAAAA ACTT TTTCTTTCTCTCAGACTT  
CTTAT GAGTCAA GAAA CTCAACTAGTCTTGGTGTATGGAGAAGGAT TT TTTAGAAA ATG TTTA TCGTCAT  
TTC CGTTACCGTTTT TTTAAA TTAAGTATACTTCCAGCTCTTCTCGG ACTCTGGCTATTTTTTA CTCCTA  
ATATTC TTAATA CAAA GATTC TTCTGTAT TTTA TCAGATAAAA CAAACGGCGTCCT TTTAAT TTTATT  
ATCAGC TTTATCC TTTATAATCC TGTTAT CAAA CAACTAGGCATT TTTATTGGGCTCTGGGTTTCTTC  
T TTTCTTGTTCTTCCGACCTACTTCC TTTAGTACAAA CTCATGATTC GCTACTAGGT CAAACTACACTAG  
CTATTATT TTTCTAATCCCTAATCGTCTGAAGATCTAGAAGTTGGTCTACTATTC CAGAAA CTGGCA  
TTATAATCC TTCTCCGGAGG GAAA AGAGCTGCGGTTCTTATT CAAA CT CAAA TAGGATGGTTACAAAGT  
CGCTACTTAACTTCCG CAGCACTC AATATTGCTGATGCAGACACCTCCTGCTCCTGTTTT TTTCTCTA  
CACTGATGGTTA TTTACTCCATGCTTATCGTGTGTC CAAA ACTGGCGGAGAGCGTCTGGCATACTCA  
ACCC AAAGTAGT TTTCTATTACAGCAATTC TATTATTC ATAGCTATAGGGCTAACTC TAGCAGCTATTC T  
TTA TCTCAACTA TTTCTGACAAATFATGAAGGTGTGTGCTGACAGTAGCTCCGGTGT TTTCTTTA GCAT  
TTT TTTA TGAT GAAA TTC GAGCAACATG GAAT TATC TTTCCAAAATT ACTCAAATA GAAA ACAGCTAGC  
CATAACAGCCT TTTA CGGTCT GAAT ACTATAAG GAAT CAAA TTCGGGAAGAGCGTCTGTATTACCA  
TTC TCCCAAGCGTGTAAAGCAGGCT CAAA CGGGAT TATC TTTCC CAAAATCTTATT CAAA CCTGCATAT  
TCTCTATTTTT TTTCTGTGCAACT GAATG TAAA CTTATCT ATTC CTGACACATGCCGCTTC CAAAATAA TAG  
CGCTGCTGG TTTA TTC TTGTGTTATCTATTT TTTCAATCGCA GAAA GCTTGGCTCATCTCCGTTGGTTG

AGTTTATTGCAAACTGCAGGGATTATTC TTTC TCCAGTCATT TTTC ACCTTCCACTGGAAGCCTCTACTC  
TATTGTCTATAATAGTATC GGGTATTGCT TTTA TTAT TTTA TCTATAGGACGCCTATAGTCTAACC CAAA  
GGAGAAGTACAAA CTTCGTTATCTAA TTTC TTGTCGTGATCTCGTTGTTCCG ATTC TGATAGATAGAGCC  
CTTCTC GAATATGG GAAA AAGCGG TTTC TATAG TTTC ATCAAAAAGGTGT TTTC GTAAGCTGGAT TTT TTT  
AGTTAACAAAGAAGGT CAAACTTGTGTCAATACAGCAA TTTAAA TCT TTTAGAAA ACCCTGAAGGGAGA  
ATCTCGC CAAAAA TAAA GTTCACGAGACCT TTTA CAGAAGGTGCGCCGATTTA TAGGTTCTACAAAGAG  
CTAG GGATTC GAAA TAACAGCTCGCTGCA ATTC TCTGTGCT CAAA GGCTGCAAGCT CAAA TTC TTTC CA  
TGCCAAACGAAGCAG TAAA GCAATTGGAAGTAACGA TAAA ATTC CTGGAA GAATGAAT GGAAGAAA GATC  
TCT GAAAGAAA GACTACATTGTCAATACAGCACAGTACACCACCTATGCACAAAAGC TAAAAAAGCTCCTA  
CCGCTGCAAGCATAGCAAAAAAGACTAGAGGGACGCTCCTGACTTCAT GAGTGC GAA TTTC ACCC TG TAA  
AGAGAGCT TTTC CTCTCTT GAAA GCTTATGTAATTGCTGATCA TAAA GAGGACGTGCTGCCTGTACAAGT  
TTTAAA GGAGGTATCGTCAAAC TAGGTGGTCTTCA CAAACTGCAATA ACCC AGCG ATTC CTTGTTT TTT  
ATTTA AGGCAATT GAAT GGAG TTTC TG ATTC TTGATCGC GAAA AAGGCTTCCCCA ACTCCAAACAATCT  
TGCACATCATGCGAAGCTAGTATGATCGTC TTTC CTCTTC CAAA GCTAATCT TTTC ACATCTTGGTATA  
AA ATTC TTTC GTAATGGGATCC AAAGACGT GAAA GGCTCATCTAACAGCAAAATAGGC CAAA GAGATAA  
GCCAAA CATAGCAACACAACACGTTGACGCTGTCC TCCAGATA ATTC ATCTG GAAA TCGATCTAACAAT  
GAAGATAGCCC GAAA GAATGCACAACATTGTAGAAA ATTC TTCTCAATAGTTGT TTTCTG CAAA CGCG  
ATCC TA ACTC CGTTAACAATAAAA ATATTT TTTC TAACGGTGCGCCA GGGT AACAAAGCTTCTC CAAA CTG  
CATGTAGGCTATCTGCTCCTGCTGTATAGGTTGCC TTTC CAGAGA GAA TTTC TCC TAAA GAACAAGAGAGA  
AGACCTACTATG ATCC TAAA TAATGTAGTCTTACCAC TTCCAGAAGCCCCAGAACCATA GAAA TCTGAC  
CAGAAGCAAAGCCAGCTGATGCATCTTCAAAAACA GAGTGC GATGCATGAGAAT AATACAGAGAT TTTAC  
GTCTAGCATGG GAAA ACACGAAC GAAA TAA GAAA TA TTTC TGGACTTGC GGTTACCAAGACTTGA ACTTG  
GGACCTCGACATTATCAGTGTGCGCTCTAACCAACTGAGCTATAACCGCAG GGAT GGAGACTAGGAGAT  
TC GA ACTC CTGACCTTCT GAAT GCAAATCAGATGCTCTACCAACTAAGCTAAGTCCCCTTGAGAGCGGCT  
GTTACC GAAG ATTC TCAGTAACAAAGCGCTATCTTA ATCC AAGAGCGAT TTTA AGCACAAG GAAA AGATTA  
TCAAAAAT GGAT TT TTTC TGTGC GAAAGAAA AAAATCTATAAAA GATACACGCT TTTC TTATGTCCATTTTC  
AAAGAG TTTC GCACCTTAGTGACCAAAAAAGATT GAA TAAA GGTGCTGT ATTC CTTATCTAAA ATTC TG  
GGAACGTCCCTTATACACCAT GAAA ACTTGGTACAGCGTGTGATTAACAGAGACAAGC ATTC CTC GAAA  
ATACACATCGTCGCATGCG ATCC AAA ATTC CAAAGC CAAATGTCCTTGTAGAGCTTGTGCTTTA AGATAT  
AGA ACTTGC GATTC AGGAAGTGC GTATAAC ATTC CTGCAAAACCTTCTTGAAGGTTCA ATTC CGGTCTAC  
TGATATCAAT TTTC TCTGGATATTC CCAAACAGACACTACA TAAA CTGTGCTATCACTAGGAG TTTC TGC  
TACATAGGTATCGTAAC GAATAGCCAATCTGATTGAGGGACTCTATCACTTGTCTCC GAAT GTTCGGGA  
GACTCAG GAAA TT GGATAGCAAAACCG TTTC CTGTGTGTAATCATAACGCTTCCAAGACAAGAGATCCG  
AAA CCT TTTC GATAGCAGAGG CAAA AG ATTC CTCTGTGGTAGAGA GAATAGTCTTGTCC TTTA AGATCCA  
GGACTTCA TCC TCCC TAAA ACCC TGAGGTTCTTCTTCA GAAA AAGCTTCTGAAGGACCAAAGTATTA  
ATTAAA AGGATAGCAGATAAAGAAA G CAAA CAGAAC CAAAAA GCATAATAATTA TAAA ATATAAAA AGCT  
TTTC GTTAC TTTA TGATAACCTCGCATGAGGTTT CAAA TTATAA GAAA AATAG TAAATAAAATCATAAA  
CATACTTCTAGATA TTTA CAAGCCTTCTCATAGGCTCTCTTCGTTCCCTAT ATTC GACACCTTCCGCGT  
TTCA TTTC GT GAAA AATAATCAAATAGATT ATCC AATAAGTTAA GAAA GCTAGTAGCTCTGT GAAT AATCT  
TGATTGTTAACGATCTCCTTGTTA GGATGGCC GGGT TCTGTGTACTAG ATCC CTAGTTATAT GAAT ATGC  
AAA GTAAGGGCCTACTGTATAAGAAGT CAAACTTCTTAGGTGGGACGTCATTAATGG GGGT GCGATG CAA  
ACGTT TTTA ACCAGCAAAAAAGTCGGC ATTC TCCCCTCTAGATGGGGAAGCTCCCCTTCCCTG GAAA AC  
CTCTAGCAAAA ATTC TAGG GAAA ACCC TTGTTCAAAG ATCC TAT GAAA ATGCCTTAAGCAGTCAATCTCT  
AGATTGTGTTGTTGTGGCAACAGATGATCAAC GAAT T CAAA ACCATGTTGTT GAA CAAA GGGGGCTCTGT  
GTCATGACTAGCACATCTTGCGCTAACGGAAC TGAGC GAGTAGAAGAGGTTGTGTCTCGACAT TTTC CTC  
AAGCAGAGATTGTTGTGAAC ATCC AAGGAGACGAGCCCTG TTTA TCTCCTACCGTCATAGATGGGCTTGT  
GAGCAGCTAGAGAACA ATCC TGCTGCAGATATGGTCACACCTGTTACA GAAA CAACAG ACCC CGAAGCG  
ATATTGACAGATCACAAAGTGAAGTGTGT TTTC GATAA GAAT GGCAAAGCTC TTTA C TTTA GCAGAAGCG  
CTATTC CTCACAAC FTTAAA CATCC AACACCTA TTTA TCTGCATATTGGTG TTTA TGCT TTTAGAAA AGC  
T TTTC TAAGTGAAT ATGT TAAA ATTC CTCCTTCTCGTTAAGCCTAGCCGAAGATCTTGAACAATTACGA  
GTATTAGAAA CAGGTCGTTCTATCTACGTTT CATGTTGTT CAGAAT GCAACGGGCCCTTCTGTTGATT ATC  
CCGAAGATATAACCAAAGTGGAGCAGTA TTTA TTATGTC TTTC AAAAGCATCTT CAAA ACTGGAGGCGTA  
G TTTC TTC TTTA GG TAAA GGACTTACCGCAGCCTCTCTAGCTCTTCTACTAGAGAGACAAGACTT GAAAG

TTGCCATGCTCAAGTTGGACCCCTA TTTAAA CGTAGATCCAGGGACCATGAATCC TTATGAGCATGGAGA  
AGTATACGTGACCGACGATGGCGTA GAAACTGATCTCGATCTTGGCCATTATCATCGCTTTTC TTCTGTA  
CAACTGTC TAAATACTC CATCGCCACTTCTGGACAAA TTTA TACTAAGGTGCTCACTAAGGAACGTAATG  
GGGAA TTTCTTGGCAGTACAGTTCAGGTTATCC CTCACGTA ACTAATGAGATTATTAATGTCATTC AATC  
GTGCGCAGATCACCATAAGCCTGATATCC TTATTGTG GAAATCGGAGGGACAATGGAGATATAGAATCG  
CTACCTTTTC TAGAAGCTGTACGACAATTC CGCTGCGAACATCC TCA GGAT TGCC TTAGCATTC ACATGA  
CATATGTC CCTTATCTAAGAGCTGCAAAA GAAAT TAAA ACCAAACCTACTC AACATTC CGTACAGA ACTT  
GCGCAGCATTG GAA TTTCTCCTGATGTAAT CAAA TGCCGTTCTGAAGCTCCACTTAGCACGGAAG TAAAA  
AGAAA AATCAGCCTGT CAAATAATGTGCCAGAACATGCAGTT TTTA ACGCGATAGACTTAGAGCGCTCCA  
TTTAC GAAATGCCCTTGTATTGGC TAAAGAAA ATATCTCAGACTTCTTGT TAAATAAA CTTGGTT TTTTC  
ACC TAAA CC CAAA GATC TTTTCAGATTGGCAAGATCTTGTGGAGGC TTTATGTGATAAGGAGCGCCAACAT  
GTTTCGCATAGGGCTTGTGGAAA ATACCTAGAACA TAAA GACGCATA TAAA TCTGTATTC GAAGCTCT TT  
TC CATGCGTCTGTGCCAGCAA ACTGCTC CAAA GAAC TTGTTTCTATTGCTCCT GAAT CAGAAGATCT TTT  
AGAACA ACTGTCTCAGTGC GATGGATG TTTAATTC CTGGAGGT CAAA GCACAAGAAGTTGGGAAGG GAAA  
ATCTCAGCAGCTCGTTATTGCCGAGAACAGAATATCC CCTG TTTTC GGAATCTG TTTAGGAATGCAGGCTT  
TAGTAGTC GAAT ATGCAAGAAA TGT CAAA GACAAA CCTCTTGCCAATTCTATG GAAAT GAATCCAGAGAC  
TCCAGATCCAGTCGTCGATGATGGAAGGACAAGATTC TGTCGT TAAAGGGGGCAC TATGAGATTAGGA  
GCTTATCC TTGCC GAAT TGCTCCC GGATC TTTA GCCTCTGCTGCTTATAAGAC GGAT CTTGTACAAGAAC  
GTCACCGCCATCGATATGAAG TAAA TCCTTCTTATATAGAACG TTTA GAAGAACATGGAT TAAAA AATAGC  
TG GGGT CTGTCC TTTA GGAGAGC CAAA C GAAA TTGTT GAAATCC CCAATCATAGATGGATGCTTGGCGTA  
CAG TTT CATCCT GAAT TTTA TCAAAAATTAGCTAAGCCTCATCC ACTA TTTA TAGAATTCATTC GCGCTG  
C TAAA GCCTATTC CAAA GAGAAA GC GAAT CATGAACATCGCTAAGCAACAACAAGCTTT TTTA GGGATCG  
ATTATGG GAAAA AACGTATTGGCCTAGCT CAAA CCAGTTCCTCTTCTGATCC CAAA CCTATAGGGAA  
TG TAGAAGCCCGTTCTCTCTTAC CAAA ACAGCTCAAGCGCTCGTCTCTATTATCAAGAGCGTGCTGTT  
ACGACAGTAGT TTTTC GGGAATCC ATTACCTATGCAAAAAGCTTATGCTTCAAGCGTGAATCAGAAA TTC  
AAGA ACTAGCCGC ACTCATCCAAGAAA TGACTGCTATAGAAGTCATTC CAAAGGAT GAGCGGCTATCTTC  
AGCACAAGCAGAACGCATGTTAAA AAGCGATTGTGGCTTAATC GAAA ACAGCG GAAA AATTC TTC GGAT  
AGTCTAGCTGCCAC TTTAATCC TTC TAGCTT TTTA GATTC TC GAAA ACTATACTAGGACCCCTCATGGC  
AAAGCCATGTTTTA TGAGAGAGAAA TCTT TTTA GGCACATATTC GTTTT CAAA GTATTGTGGCTCTCTC  
TTAAA AAATTAAC ACTC TATACTAGGTTGTACCTTGAA GAAAT TAAA GAC CAAA GCCCCACATTACCAG  
CCTGCCCTCCCTGTATCGTGTTATT CAAAGTGCTACAGGAGACTTGACCTCTAGGAAGCTCT TTTTC CTGC  
TTTA TACAATTTA ACAAAGGAAGGACGTCTATCC GAAA AC CAAACAAA TGTTGGG CAAA CTAGCGACCT  
AAGTCTCATGAGCAA TTTTC GCGAA GAAA TGAAGCTTGCCGTT CAGCATTTTC TCTC ACTCATCG GAAA TAG  
ATATTCGAG CAAA G GAAAGTCTG GAAA ATAGAATCT TTTA CCACCAAGCTAATT TTTTC TGATGCCGAAGG  
CTACTCTGCTCT GAAA GCTTACAAA GAGCAACTAGATCAACAATATGGAACACAAGG GAAT CGCTTTT T  
TATTTA TCAACACCACAGATTA TTTTC CAG GAAA TC ATCC GCAA TTTA AATCGGCATCAGCTATTC TATC  
ATGAACAAGGAGCACAACAGCCTTGGTCTCGGCTAATTATA GAAA AGCCT CAAA GAGT TAA TTTAGAAA C  
AGCTCGAGAGCTTCAACAATGCATTGATGCCAATATGATGAA GAGTCGGTTTA TCGAATAGACCATTAT  
TTA G GAAA A GAAA CGGTTCAAAC ATTC TGACTATTC GT CAAA CTAAT ACTCTC CAAA AGTCTTGCTGGA  
ATTC TCAGTACATAGATCATGTGCAAATCAGCGTTAGC GAAT CAATTGGTATA GGAT CTCGAGGG GAATTT  
CTTC GAAA AGTCGGGCATGCTACGAGACATGGTACAGAATCA CAAA ACGCAGCTGCTATGTCTACTGACT  
ATGGAACCTCCTTCT GAAT TTTTC TTCCGAAGAAA TAAAAA GAAA AAAT TAAA ATTC TAAAGAAA ATTC  
TTCTTATCC GCGAAGAAGATGCTGTTCTGGCCAATATGGTGAAG GGAT TGTCGAAGATGTTTC AGTTCT  
GGGCTATCGGGAGGAA GAAA ATGTGATCCGAATTC TTCAGTA GAAA CCTACGTTGCAT TAAAA TTA TTT  
ATCGACA ATCCTCGCTG GAAA GGGT TCCCT TTTA CTTACAAGCAGG GAAA CGTCTTCC TAAA AGACAA  
CAGATATCGCTGTGATC TTTAAA AATCCAGCTACAA TTTATTC AATGCAGAGAAT TGTC CAAA TGTC  
GTTA GAAA ATGA TTTA CT TATTATTC GTATTC AACCC GGAT GAAGGTGTTGCGCTACAA TTTA ACTGCAAG  
GTTCCAGGAACAAATAAGCTCGTACGTCTG TAAA AATGGACTTCCGTTACGACAGCTATTTTA ATACTG  
TTACTC CCGAAGCTTATGAACGGT TACTGTGCGACTGT ATCC TTGGGGACAGAACGCT ATTC ACTAGCAA  
TGAAGAAGTCTTAGCATCTTGGGAAC TAT TTTTC CCTCTATTA GAAA AATGGTCTCAAGTAC ACCCTATA  
TTCCCTA ACTATATGGCC GGATC TTTA CGTCTCAAGAAGCTGATGAACTATTATCTAGAGATG GAAA AG  
CTTGGCGGCCCTATTAA CAAAT CAAA CAAGAGGT TATATACATGGCT ACCCTTATTAGCC TAAA TGATGC  
GAAT GAATGCTTATCGCTGACTC TCAAGAAGAGT TTTA CAAATCGCATGTTATGATT GGAT CTCTACA

GCAAATAAAGCGATTACAAAACGCGGTGCATTCATATGTCGCTCTTTCGGAGGAAA AACTCCAAA CAAAT  
TTTC CAAGAAA TTGTGAAGAAGCGCGGCTATTTTCAGACTGTTC TAAAATTGTGGTAT CAAA GGGAGA  
TGAGCGCGCAAACGAAGATGTGGAAGCTGGAAGTAACATATC TAAA GGCTATGGATATCT TAAA AGGAT TG  
CGCATTC CAGAAGATCAAATC TTTC GTATGGAT ACCGCAGATCC CAAAGGGGAT GAGGCTTATGAAGCGT  
TGATTC AGAAGTATGTTCCAGATGCTATT CAAA ATATGGTAATGCTTG GAGT TGGTGAAGATGGTCACAC  
GC TTTC TCTCTTTC CAGAAA CACAAGCTCTGGAA GAAA AAGAGCGT CAAATAGTC TTTAATGAAGTCCCC  
CAATTACAT ACCCGCC GAATGAC TTTAACATTTTC CGATTGTTGACAAGCGCGGCATCTTGTGGCCTACG  
TTCAAGGTGAGAA TAAA CAAGATCT TTTC CATAAA CTTGTGC ACCC TTTAGGTAG GGATACC TTTC CTAT  
AGAAC GAGTAGGAACTC CTC TAAA TCC TGTGCAGT GGGTACTATCTTCTGATAGTTGTA GAAA AAC GGAT  
CTAGCAGAT ATTC CGGCCGATTG TAAA TTAGAGATGTTCTAACTTCTTCTTCGATTAC GAATAGCCATCT  
GTTGTGCGATT TTTAAA AGACCATAGTTGCAGGCAA ATCCATTC AAGACAAC TTGGTGCAGAA GAATAGGA  
ATCC AACGCTTGCACAGCAC GAGT GATGATAGACAAGACTTCTTC TAAAGGAT AGACTGGCATGGTCTTG  
A TTTC G TTTAGGAG ATCCGGAT ATGCAAGTAATGATACTGGCACCTTT CAAAC TAAA GAAA CCGATCCC  
TGAATAGTTGTAGAAGGACCGTTAGCATAGCCTTGGT CAAATCTCGCAGCACCTG TTTATCTTCATCAGC  
TGTTCTT TTTA CTTGAGAGCCTATGCGTGTACAG ACTCCTT ACCC TGTGC TAAA CCAATCAAAAACGCG  
ATATCC TT TTTA CTAAC TAAA GTCT TTTC CTCCATAGGAATAT GAAA TGACACACATCTAGATC GAATAG  
TAGGAGGCAGTCTCTGAGGCAAAGC GGATACTAGTA TAAA CATACCGTACTGTGGT GGATCCCTC TAAAAG  
CTTCAAAAAGCTGAGATCGCATCTAGTGTTATTC TATCGGCCTCA TAAAATAATA TAAATTTTA TATGGG  
C TTTC ATAAGGATGAATCCAAAT ATCC TTTC TAATGACAG GGGT GTCTCAATCGTATGAAGACGTCC TT  
TCCCCTGAGGAGAGTACTC GTGTATGTCTGGATGCAG TTTA TTAGCTAA CAAA TAAGCAGCTTC GGGTAA  
GG TTTC CAAA ATAATTAGAGAAGCAT ATTC ATAAGCTCGAGCTGA TAAATT GGAT TAAATCC TGCCCATGT  
AAA ATGATAGCAGAAGGAAGCTTCTGATCACGC ACTC TCTGTATAAGAGCCTCCCAAGCAGC ACTC TCCA  
TTACCTCCCCCTGTCTATATCAATGCAC GAAT CTGTAAGAGAGCTTGGTCAACAGAAGCCTCTGTTGGCA  
AGAGGGCATC TAAA ACCTTGTACCTATCTGGAGCTT TTTC TGC TAAA GCAA GAAA TCC TTCTCTGACAGA  
CTGGTG GAAAACAAA TGGTT CAAA CTCAAATTTA TCCAGATG TTTC TGACGAGCC TTTC GTAGTAATCCT  
TCTCTTGCTG GGATATCCAATAAGAAT ATGATGTCTGGCAAGAACGGCTTATCTCCACAACATGATAAC  
ATAAGTTCGTAACAAA ACTC TCCCCTAAGCCTCCAGCA ATTC CTTGATATACAATAGTAGAAT CGT GAAA  
ACGATCGTTATAACCGTCTTCCCAGACTTAAGAGCAGGTATGATCT TTTC CT GAAT GTGTTGTGCACGA  
GCTGC TAAA AACAACAACAATTC TGCATATGGAGATATTT CAAA TTCT GGATCC AGAAGAAGGCCTCGAA  
CACTGTCTCCAAGAGAGC ATCC CCTGGCTCTCTCGTAGTGACAA TTTC TCTGCCTTCTTCTAT TAAACG  
CTTA GAAA GCGCTTGTATAAA CT GAGT TTTC CCAGCACCTTCTCCGCCTTCTACTACAATAAA CACGCTA  
TTCTCTTATTGT ATCC TGCCAGATTGAACACTTGTGCAAGAT TTTC TTCCG TTTC CACTGATTC TGTA  
TTTA TGGATAGTT TTTC CATAGCAACAAGCGTATCTCCTTCTCGAAGATTGACAAGACGAACACCTTGTG  
TGGCTCGTCCCATT ACCC GCACATCTTGCATGTTA ATTC GGGAT TGCTTGCTCTTGAGCAGACATAAGTAG  
GAT ACTATCACA ATCC GTTACC GAAA TAGCTCCTAATACATCTCCA TTTC CAAA GTTAATCACGATTGAA  
CGAACACCAACTTCCGCGA CAAATTTCTCG GAAA TCACAAACTAGCGAACG TTTC CCAAATCC ATTAT  
CACACACA ACTAGAACGC CAAA ATCTTCAGTTACAAC TTGACAGCTGACTACAAAATCTTGTTCATTT TT  
TAGA GAAA CACCTCGC ACTC CTCTAGCAGCTCGTCCCATTGGACGAACCTTATCATGAGGGAAGCGAACT  
GCC ATTC CAAGACGTG TAAATAGCATAAC TTTC TCTTCATCGTTCGCTATATGACGAGCAGCTATAAGCT  
CATCC CATCATCGATCTCGAGAGCTCGT ATTC CTTT TTTA CGAGGGCTGCCAAAGGCATCTAAGGAGAC  
TTTC TTGACAAC ACCC TTCTTGGTAGC TAAA AAGAGGT ATTC TCCTTGCTCGAACCCT TTTA CATTAAGC  
ACCGCAGCAACTTGTCTCCGGGAC GGATTC CTTCAG GAAA TTAATAATAGG TTTC CCT CAAA CTCTAC  
GTTCTCCTTCAGGAAGCTGCCATAC TTTC AACCCAGTAACACTGACCGAAGTTGGTGAAGATCAGTAAGTA  
ATC TTTC GT GGAT GCG GAGTAAA CAGC TTTC AAAAAGTCGGAACC TTTC TTCATATC GAATCC AGT GACT  
CCTTGCCCGCCGCGTT CAAATTCGCG GAAAAC TTTA ACTGGCATAACGTTACATAATC ATCC CCAGAAA  
TTGTGATGATTACAG ACTCATCT GAAA TAATATCTTCTATGTCCCGAACATCTCTGTGTCCA TTTC AAT  
TTTA GTACGACGAGGGCTTATGAAC TTTA TGTAATTC TTGCAGTTCTTCAC GAAT GATATC TTTA ACT  
AACTC TTCTTCAGCTAGAACCTTACGATAATAAGTAATCT TTTC TAACAGCTCGCTAT ACTCTT CAAA TA  
C TTTA TCTGCTTC TAAA CCGGT GAGT TGGTACAATCGCA ATTC CAA GAATAGCTAATGCTTGTGCTTCT GA  
AAAAC TAAA TAGTTCAACCAGCTGTGT CAAA CGTGTTC TTTACAAA AAC TTTC TC GAATGGTT TTTACT  
ACTTCGTCCATACAA GAAA GTGCT TTTA AGAAGCCTTCTAGTATATGCGCACGAGCTTCCGC TTTATTTA  
ACTC ATAAC GAGT TCTTCTTC GGAT AACGTCCATACGATGAC GAATCC AAGCA GAAA TC ATTC TAT GAAT  
ATTC ATAGTGCGCGGAAGATT TTTA TCTAGAGCCAACATATTAGCTCCAATGTCACCTGCACATCTGTG

AAATTTATACAGACGATTGATAACAAC TTCAGAGGATTC TCCTTTTTCAGCTCCAGCACAAACACGAATCC  
CGTCCAAATCAGACTCATCGCGGACATCCGATATTCCTGTAAAGGTCTTTTCGTTGATTAACTCGCTAT  
CTGCTCAATTAATCGTGA TTTATTTACGTTGTAAGGCATCTCTGTGA GAATAATAT TTTCTCGTTGCTTG  
TCCGAGTTCCTCTACGTGCATACGAGCGCGCAAACGTAAC TTTCTCTTCTGTATAATAGGTAGAAC  
GAATCCCTTCTGTACCACAAATAATCCCTCCTGTAGG GAAATCTGGGCCAGGCATTACCTCCAAAATATC  
TTCAATAGAGG CAAA ACTGTTAGCCAAAATAATAGCGTAGCCTCAATTAATTC CCC TAAA TTATGCGGT  
GGAATA CAAAT TGCCATCCCTACC CGATGCCTGAGGAGCCATTACAAAG TAAA TTAGGGAAT CAAA AAG  
GAAA AACTACAGGTCATA TTTAG TTTCATCGTAGTTAGGGACCATATCTACAGTATC TTTATCTAGGTC  
CTCTAACAAAAGATAGCGCTGT GAGT CAGGCGAGCCTCTGTATATCGCATGGCAGCAGCTGGATCC CCG  
TCGATGGATCC AAAATTC CTTGACCATCAACAAGA GGGTATCGCATGGCCAAATCC TGTGCCATCC TTA  
C TAAA GTAGGATAAA TGACAC TTTCTCCATGGGGGT GATAATCTCCGGAAGTATCACC GCAAAT CAAAC  
GCAT TTTCTGTGC TTTACTCCTG GAGT CAGAT TTTAATTG TTTTATAGCGTA TAAA ATACGTGCTGAGAA  
GGT TTTAATCCGTCCCTAGCATCAGGCAAAGCGCGG GAAATAATTACCGACATG GAATAACGAAGGTAGC  
TCTCCTTCA TTTCTCTTCAAGATT TTTAGGGACGATGA TTTCTTC TTTATTTA GCATGGTAGTTCTGTC  
TCC TAAA TATC TAAA TTATTCATCCGAATGGATAAA GCGT GACTC TTAATGAACTC ACGTCTTGGAGGTA  
CCTCTTCTCCCATTAACATTG TAAA GATATGGTCTGCTTCGACCGCATCC TTTAAA GAGACTC TAACGAG  
AGTCC CAAACTCAGGATTCATTGTTGT ATCC CACAAC TGATCTGC ATTCATCTCTCCAAGACC TTTA TAC  
CGTT GAATCTCAATTCCT TTTCTTCCAAGGCCT TTTAAGTAGTCTATTACCTC TTTCAAGGTGTAACAAA  
CATACGGAGATAT TTTGGATCTTCTGTAGAAA CTGTAATACCAGATCCCT CAAA GATGGAGGTAATTCGG  
GATATCGTAACCGTAATCACC TAAA TCGCGCTGAAGTTCCTTCGAGAACAGAACC TTTATATAACTC TAAA  
ATCCGCGAAGCAGATTC TTCATTGGCAGCAATAGCTGCTTCTTCTTTCATGAGAATAGAGATAACTGC  
CTCCCTGCTTCCAC TTTCTGGAGGATAGTAATACAAAGGAT AAGCTCCGTCTCGGAACATATCC AAGAA  
TTCAGAAAATGGAATCGCTTT TTTCTCTAAAAGAAA CAA TAAAAC TTTGACCTCTA GAATAAGATTAACG  
AACG TTTCAAAGCTTCCCCTCTCAG ATCCCTTAAGGTGTCATCAAAAAC TATCTGGCTTTCT CAAA TTC  
CTAAGTTCAGCAAATAGCC ATCCATCTCTTT TTTCTGAGAGAAT GTAACG GAAATCTTT TTTCTTGCTCAC  
TCGATA TAAAGGAGTTGCGCAATATAGACGC ATTCAT TTTCTATCAAAGCGGACATATGTCTATAGAAG  
AATGTTAGCAACAAGGTTG GAATATGAGAACCGTCCACGTCAGCATCTGTCATAATAATAATACG TTTAT  
AACGCAACAAA CTGAGGTTGAAA TTATCCCTTCCAATTC CACATCC TAAAGCTGCTATAATGCTTCCAAT  
TTCTGGT CAAAGAAA ACTTCAAATAAA CGAGC TTTCTCAACATTCAGGATCTTACCAC GAATAGGAAGA  
ATTGCTT GAAAACGACGATCTCGTCCCTGCTTAGCTGAACCTCCCGCAGAGTCTCCTTCCACAATATACA  
TTTACATTTTTCAGGATCTT TTTCTCAAGCAGTCAATTAACCTTACCTGGTAAGCGAGCGCTATC TAAAGC  
ACT TTTCTGAAAAGTTAGCTCTCTAGCTCTCTTAGCAGCTTCTCTAGCTTGGGTGCAACGAACACCTTG  
TCTACAATCGT TTTAGCAA CAAAAGGAT TTTCTTCAAAAATGTGGTTAACACCTCACCCTAA CAACT  
GAGAAA CCGATCCGACATCACTA TTTCAAGTT CAAAT CAAACAAA CCCTTCAAAC TGAGGAT TGGGCAC  
TTTACG GAAA CAATGCTACTAGCCCTC CAAAATGTCTTCTCCAGTCAAAGACA ACTTGTCACT TTTA  
GATAGATTATGAGC TTTAATATAG GAGTTTACTGCC GAGTAAGAGCCGTA GAAAATCCTGTTAAA TGAG  
TTCCGCCTTGTCTGTAG GAATATTATTAGCGTAA GAATAGATTAATTCGGAGTA ACCAGAATTC CACTG  
TAAA GCAGCCTCAAATTC TATATCCCATCATCTCCAGGTCTCGATCCCTGAATA TAAA TAGGACAAAAG  
AAA GAATTTCTTTA TCAAAGTTGAGGTA ACTGAC GAATGATT GAATTCGCGCTTCATAGAA GAAAACGA  
CTTTA TCAAATCCCGTATCACGGTCATCTTCAAAAACAATCGTGGCTCCACGA TTTAAA AATGCTAATTC  
TCGCAAACGCTTCAT TAAAATCGCGCGATCAAAAACGCACGTAGA GAATATAGCTGGATCTGGA TAAAAG  
AGAACTTCTGTACCTCG CAAATCTGTAGGACCAAGCACCTG TAAA GTCGTTAACGGAGCGCCTCTT GAAA  
ACTC CATGCTATACGCTTGTCCATC TTTAAA TACT CAAA CAAT GAAT TTTCTGGACAGAGCATTAACGCA  
C GAAA CTCCTACTC CATGCAAGCCTCCAGAAA CCTTATAACTGTC TTTATCAA TTTA CCTCCCGCATGT  
AGTACGGTAAGAACCACCTC TAAA GCG GAAATTTCTGCGTCTTGGCTTGGCAGATTC TTTCTGT GAATCT  
GAATAGGGATTCCTCGACCGTTATCC GAAATAGAAA TACCTCCGTCCTCCAATATGCGAACAACGACCTC  
GGTACAAA ACCCGCCATTGCCTCATCGATACTGTT ATCCACC ACTTCA TAAA CCAAGTGATGCAATCCG  
GTA ACTCCTGTATACCAATGTACATTC CAGGACGCTCACGAACAGCTTGAATCC TTC TAAAACGGTGGA  
TGGCTGATGCGTCGTA TTTCTTTCTTGTGCGTCCATAACTATCC TAA TAAA AAGCGTATCTC TTTAAC  
AAA GCACCGGAACTGCT GAATGAATTCGGGATATCA ACTCTT CAAAAGAGC CAAAT TTTAATACAGCAT  
ATAACGAAGCATTGCGGAC TTTAATCGA TAAAATTC CGTCTTAAGCCCTATAGCCT GAGTCATCC CATT  
ATACTTC TTTCTA GAATTTCATACCACGCCTCTATGACCTCTTGTGGCTTGGCCGAA GAAT TTTCTGC  
AAATGAGACAAATGGTCTCGGAGAAA ATGT CAAA CATGCTTAATGGGA GAATCTGTTGACTTGGT TTTCT



TACGAC GAAAACTAGGTAGAT CAAA AGGATAAAA AAGACACAACGCTCCTTCGATATGCGCAAGCACACCT  
TCCTTCGCAGAAGGCTCAGGAAGAAGGCTCTTATACTTGTTGCGAAC TAAAAAAGTCAAAGTATTAGCGC  
TAAGTTCTAG TAAA TCC TTGGATTCT TAAAAATGGGTAGTTAACTGATTAACAATCATTG GAAAC TAAATC  
ATTAATCG ACTCACT TTTAGATGTCTTAGGCAAAAAC TTTACAACA GAAACCATC TAAACGAACCACTTCA  
CCTC CAAATCCTAGAA TAAATAATTCATCCCAAACGCGAACAAAAT CAAAATCC GTATCGATTCTTCTT  
CTAACAGCAGTTCTCCATTACGGCCTAT TTTA CCAGC CAAA ACTAGTTCAACTACATGGCTGCCACAGC  
GATGTA TTTAGGAACATGACTAAGATC TAAATC TTTCTGCA GAAT GACTGGACGCTCTTGTTGGACTTCC  
TCCGGACCAGACAAGG GAATCC CTGGCTCACAAGTATAAGAAGCTTCTTCAATAAGAG GAGT CGCCTGCT  
CTTCTT GGATAACAGGTTCT TTTAAA CAGATCC TGT CAAA TTAGAAT CACGTATT TTTCCCTGCTGCTTCG  
GAT GTGACAAAATTC TAAA ACAGCTAATAGAAGCCGGTGGCTAATACA ACCC CACCAA GAAA CAAAGCT  
CCCAAACAACAGAAA AAGCTCCACCAACAGCTGCAGCACACGCTCCAACAATAGCCAAAACCTGTGCCCA  
GCACAAA TAAAGCTAACGAGACCTC TTTACTACCTT GAAT TATACT GGGTATTC GCGGTGCAAT TGTC  
AGACAAATGTATTCTGTGAAGCTTCTTGTTCCAACCGATTGCACAAA ACTCCTCC TTTCTTGTTTT CAAA AGA  
TCAAACAAGTAGACGGC GAAAGAG TTTATAC TAAA CCCGAT TAAA AACACAAAA GAAT CTCATAATCGCG  
CCGT TTTA TATACGGTCA TTTAAAATTC CCTCTC GAAT TTTCTCGCATGACTT CAAA CATATGATGCATGT  
TGT GAATGGACGCCAGAT ACCCGCA CAAAGCTCATGTACT TTTAAA CAAATGTCTTAAAGTAGGCGCGCGT  
TATGCC TTGAGAGCATGCAAGACATGAAC ACCC AGGCTCTATA GGA TTTAGGTCAGAA GAGT ACCGTTGA  
TTATTAATT TTTA GAGGGCCTTGTTGATGTCAAAATCATGCCATGTCGCGCAGC TTTA GTCCGAT AAGAGC  
TATCAAAA GAATCT ATTCCGAAA CCAACAGTGGCCCAAATAGAGGGCAAATCTCC TATCCCTAGCAGATG  
TCTAGGTC TTTCTGCT GAAA GACAAA CAGCGGTAACGCCACCACCTCTACGATATCTTGAAGATT TTTCT  
CCCAAAC TGCTCCAATAGCAGAGCCATC GAAA GGCAAATCTTCTAC GAATTTA CAGCCAAGT TTTCCAA  
AATCAGG GAAA GTCCCCCAT GAAT GACTCCGTACATGGACT GAAT TCCAGGAT TTTTAAA TGATAATC  
CAAAGAACG TTTCTCCCAAACGTAAGTGCCTGAGATGACTGGT GAAA ATATGTG GGATCTGCAT GAAAG  
GGCAGCAGCTCATC TAAAGGAAGAAT GATATCAGCGCCAAATC TTTCTGCGCTTGACAGAAA TTTCTG  
GAGAAA GAAATAGCTTACGGCCATCTCGGTAGGAT TTTAAAGTGT ACCCGTCATCATTAAC TTTAATGAT  
GGTG TTTCTCCTTT TTTCTTCCCGCAACT TTTA ATCTCTTACGCTACAGAACCATATGCCAAGC TAAAA  
ACAAAAAA TCCCCG GAATCTGTAATAATAGGCGCATTGCACCAA TAAAT TGGTGAATCCACCCATAG  
CAGCAATAGCTTCTGCTCCC GGATGC ACTATCAGATGATAGGTATTGCAAACATTAGCGGGATATTGCT  
ATGATC TAAA ACTC CT TTTA GAGCTCCA CAAA TAGCCACAGGAACAAAAGCCGGTGTATCAATAT ACCCA  
TGCGCCGTCTCTATCC GACCTACTC TAGCCCTAGATTTT CAAA ATTGATGCAGAAT CTCAAACG TAAAG  
CCACAA TCCACTCC TTTATCTAAGC GAATTC TAAA AAAATAAT TAAA ATTCATAAA TCATTCTAAA GAGA  
GGGGGAGAAAAGACATAGT GAAA AAAGCCCGAAGAAA ACC CAAA TCTTCGGACTCACCCACTACAAAAA  
AAT TAAA ACATTTA GAGTGCCGGTGAATAGGAAGATGACCATCGACACGATATCGTTAAGAGCTGTAA  
CAATCGGACCAGAAGC TAAAGCC GGATCAACGCCGATT CAAA CAAAGAA GAAA GGA GAAAGA ACTC CTAG  
AGTAGTAGCAGTTAACGAAGCACC GAGTATCC CCACA GAAA CCGTA ACCCCTAACTGGACTCCTCCCGTA  
GCAAACA ACCCAAGTCCCAAGC ATCC CATAACAACAGACA ACTAGACCACAAA GAATCC TAAA GCA ACCC  
CTGTTAACAATCC AATGCTCA TTTCTTTAAGAAT GGTCTCTCTTCTTCTACCAAAA GAAAGCGTTCCTGT  
TGCCATACTACGAACAA GAATCGTGTGCTGACTGC ACTC CCACG TTTCC GAAA GACC ATTCAC TAAA GGA  
ATGAA GAAA ATGACCATGGC TAAA AGAGTAGGGCAATTT CAAAAAA ATATGCCATTACCGAAGCGCTGA  
CAAGTCCCGCACATAAGGTAATAAGTAACCAAGGTGCCCGCAATAA GAATCGTTGCACAACATGGCAGTC  
GTGAT ATCCAACATCTTCTGTGCTCCCCGCC ATTC TAGCAATTG TTTCTGCTGCGATATCTTCTATTG TT  
TCAACCACATCTTCATATGTGATAGCCCCTATCAAAAAGT TTTCTTCGTCCACTACAGG TAAA ACAGCGA  
CTTTA TACCGCTCCACAAGGTCCACA ACTTCTTCTCTAGTTGTATCAGCTAATACTTATGTTCTATAGG  
ACGCATGA CAAAC TTTAAGGGCA TTTCTGGCGAAGCAATAAT TAAA CTCTATCTGTTACAAA ACCCTGC  
AACTC CCC TTTAAA GTCTAAGACAAAAACTAGTC GGGTCAAATCAATGCCAGGAT TATTGCGTATGCAGG  
TGGCAACTTCTTTA ACGGTTG TTTCCAT TAAAAAGGCAAAAA ACTC ATTGGTCAT GAGTCGCCAGCTGT  
ATTC CTTCATGCT CAAATAAA TCAC GAATC TTTAAGGC TTTCTTAACTCGAT TAAATC TAAAATTC TT  
CGATATCTTCGGTCAG GAATATCATCAAGA ACCCAAATCGCTTCGCTCGGAGGCA CAAATCTATAAGAG  
CGCAA TTTCTCC ATCC GATAGATTGCG GAAA ATAGCCCATCGCGAAGCGGAATCC GTATTAATAA TAAA  
AGCAATCTTGGAAGCTATACTATCGAGATTCTTA TAAA GAATAGAGCGT GAATCC GAAGGTAGACATGAT  
ACCGCATACGCTAAGTCAATA GGAT TATATACACTGACTATTGATGT TAAA TCTTGC GAAT GTTCCCCTG  
CTGTTA GGGTATCAAAAAGCTTCTTCTAG TTTAAA ACATAGTTTCATCATCTAGATGACTAGT TTTA GAATC  
CATAAGA TTTCCGGAAGTTAGCGCAAC ATCCA ACT TTTCTTCCG TTTCTAT CAAA CTC TTTCCACGCCCTTC

TCCGTTCTTTATATAAAAGACTCTTAAAAGTCGTCTATTAGCGACACATTCGGTCTAAAAGTCTCGCCAAAT  
CTAATACCTCAGACTATCTATTAAGAGATTTTFTTACGAAAACGACAAAAAGTCTTCCGAGACTCTTAAA  
CAAGAGTCTTACTATAAAAAGATACFTTACAAACAGATACACTTAGGCAGCGACCTAAAATTATCAAA  
TCACTGTAAGCTTCGFTTCTTCTGACAAATGAAAACAAGGAATTAGTCGTGACACACCCATGCCTCGGAT  
CCTCCGCCTAATCCFCGACTACATGATGAAGATFTTACTGTAGATCTGCAAGCAAAATCGCTTTAACCCTGC  
TAAAACFTTAGCAGFTTAAAACFTAAAAGCTGGCCAACCTTCTGGAACAGCCCCATAAAAATGATGC  
CAGATACTCTTTACFTTTCGGGAAAAGATTGTATTGATGGCCGTGCTCCAGAGATGATTACCCATCTTTC  
AGAAAGAACAGTTGTGCCGGCTGAAAACAACCAAGCAATACCAAGCATCAAAACCTAACCCGGAGCGCG  
TCCCCCTCCCTCGAACATATAATTTTFTTACAAAAATCCCCAAACTCTCTCGGAACGAATCACGTC  
ATTATTCCAATCTCGTTCCAACTGGCTAAAACCCTCTACCTGACAAAAGGATTTAGCAACCCATATAAG  
TTCGCFAAAATAACAGGCTGCTCCGFAAAAAGGGCCTTAACAGCCTGCAACAAAAGAGCGAGTCAFTTCTC  
GAACGATATCAGAACAACAACACFTTCTCTFTTAGGGATGTCTGTCTGATAGTCAAAACGCACCATCTG  
GAATAGGATATAGAAGGGAACAATGAAAAGCGGAAAATATTGTACAGCATCCGCACATGGAAGATA  
GGTAATAGAATACTGGTAACGACGCAATAACGGTCCGAGCGTCCATGGGAGGATATGTATAAAAGGGTG  
CAATCCCTGACCTGTTCTATCTAAAAGCGAAAATCCATATAACATATCGGGCTCTTGGATCGGCCGGAT  
AAATTCCTCTTCTTFTTACACACAGGATAACCCGCTCCATTGCCGAGAGATAAAAAGTTGTATCTTCTTC  
CCGTATAAAACATCCACTTTAACAGCGATTCFAAAAAGAAATAGTACCCCCCTCCAAAATAAAATAAGG  
GAAGAATCGCTATAGCAAACATFTTAGGAAAAGGTCAGCACTCTTGAATTAGCTAGATAGGCTATCCGACA  
ACAAATCCACCCFAAAACAACAAGAACCCTACAACAAAACCTAATAACACGAGCCGAAGATGGTCGATAA  
GAAGAAGCGTTTAAAACCTACACCCGGTTATACGTTTCTGAGTAGCTCTCAAGCTGAGCTATTAGGAAAAG  
ATTCGCGGTACGGGACGCAATCTAACCTCCGAGGAGGGAGATTTAGAGACATAAAAACCATTTAAT  
TCTAACCTTCTAAAATTTTACTTTTACAAAGTTGAAGCCATTCCTCAATCTCAAGTATTAGACTAGATT  
TTACTAATTAAAAATAACCGTTTATTTCTAAGTCGACTAATCAAAGAAATATCAACCGCTGGTTAATAA  
AACCCAACTAGTTATAATGCTATTTCTATTTCTCAAAACAAAACCTCTTACTTTAAATTAACAAGACTTT  
AAAACCFTTATGGCAACAACAGTTAATCCTAATTACTCTCTTCTTCAAATGAGAAAATGGTTTCTCTCAG  
CTACGTTAGCTGCTCATTCCTTTTAAATCATCTCAAACCTCAAAATTCGCTTCTTGTAGGATATTCAAA  
CATATTATTAGGAGCTCTAATCTTAACAGGTGTGATTACGACTATACCCCTCTATTGCAGCAAGCTACTTT  
CTTCTCTGGGAGTTACAAAAGTTATCGCCGGGGCGGGTTTATGCGCAGCCTTTAAAACGCCCTCTCTTCT  
CTGTCACTCAATCTAAAAGCCTCAACTCTTCTGCATATCTCTTGGCATTAAACGCTTGGCTTGATTAACAAT  
CTCATGATACGATCCCTCTCTTCCAAAATGTTTCCCTCTTTTAAAGTGTTGCTATGTTGACACTAGGC  
TTAGAAAAGTTCTTGGGATGAAAATCCCTGTTCTCTTGTCCAGAACGGGAAAATCTTAGCAAAATAAATTG  
CTTCTCAAGACATTCATGCTTCTTATGGAGGAGTGATCCCTGAATTAGCTTCTCGCGCTCATCTACAAC  
ATTCACAGAAGCTGCTGACTGCAGCAACGCAAGCGGGAGTCTCAAAAGAGATATCGAATTAATTTTCG  
GTAGCTAATACTCTGGTCTTATTGGAGCCCTATCTATCGGTGFAAACCAAAACAAAAGGGTTGGCAAGTG  
GGCTGAAAAGACCTCTCATAGGAGTGAACCATGTAGAAGCGCATTTATATGCCGCTTGCATGGAAGCTCC  
CGCCACTCAATTCCTGCTCTAGGGCTTGCTATTTCTGGTGCCCATACATCTCTAFTTCTCATGCCGTGAT  
GCCACAACFTTCTCTTTAATAGAAAAGCTCGAGATGATGCTATTGGCGAGACTCAAAATAAAGTAGCTC  
GTFTTCTCGGCTTGCCCTTACCCAGGAGGACAAAAATTAGAAAGAATTAGCTCGAGAAGGTGATGCAGATGC  
ACAAAACCTTTCTCCAGCTCGAGTTCTTGTTATGATTTCTCTTTCTAGTGGACTAAAACAGCCGTCTTA  
TATGCTTTAAAAGGCAACAACAGCTCAGCAAAAGCACCTTTCTCTGAAGTCTCTGAAACACAGAAAAGAA  
ACATGTCAGCATCGFTTCAAAAAGCTGTTTATGACTATTGCTCAAAAACCTTCTGATATTGTAAAAGC  
GTFTTCTTGCGAGTCAAAATTGTTGGTGGGGCGTAGCAACAACAGTTACTTCCGTCGCTTGCFAAAT  
CAAAATAGCTCTCTTCCGATATACTTCCCTTCTTCGAGTTATGTTTCAGACAACGCTGCAATGATAGCTG  
GGTTAGGAGAGAGACTGTCAAAACATCGCACACATGTTTCTAAGGAGGTCATTCATGCGCAAGATATCA  
GTGGGAATCTGCTTGCTCCTAGCATTAGCAACTTCTGGATGTTCAAAATCCCTCCTTAACGCAACCCATC  
GGTCTCCAGCTACTCACACAGTTGCTGTAAGCGTAAAAGATGATCCCTCGCACACAATACTTCGAGAGGT  
TCGCCTTCTTTCGTATATCAAAAATTCATCATCTCTATGAAGGATGGTACAAAGAACTCCTTCTGGA  
GAAGTCTTCCCTGCFTTAGCGGAGAGFTTCTTCTTATCCGAAGATAAAAATAACTTATACFTTCAACTTGA  
AAAAGCTTCAAAAGCAATGGAGATCTTATTACCGCTCATGATCAAAATTCGTTCTGGAATGATGTGTT  
ACAAAATCGTGTGCTAGTATTTAATCTTTCGCCFTTCTCCCTATTGACGTGAATTAAGGATTCFTGGATTT  
CAAAACCAAGATGATCATACTCTTGTATCAATCTCTCACTCAACTCCACATFTTCTAAAAGCTGCTTA  
CCCCTCCCGTATTTATCCCTGTGCATTCGCAGCATCAGATATGAAAAGAGAAAATCTCTTCCGATATC  
TACTGGAGCTTTTTCCTAAAAGAGAAAAGAAAGACCGAAGATGGTTAAAAGCTAGAGAAGAGCCCTTACTAC

TATAA TAAA GACCAGGTAGCTGTACAGGAGATCTGTATACACATC ATTCCTGATCAACAACTGCTTCTG  
C TTTA TTC AACCAAGGGAAGCTAGATTGGCAAGGCTCCCTTGGGGACATAGT ATTC CGCAAGAAA CTTT  
AGCCACAGCAAACAAACGACGAGCTCCCAATCA CAAA ATATATCTGGTACTTCTGGCTTACA TTTAAC  
ACTGCCAAAAAGCCT TTTAGTC ATTC CAAGCTTCGCCAAGC CAAA AGTCTAGT TTTAAA CAAAGAAGCTC  
TTGCCTCCTTGGCT CAAAT TAAA CCTGCAAAACATCTCCTTCTGCACA CAAA CACACCT ACCCAGAGCA  
GCCTTCTTATAAGCAACAAGAGGCCATCAC TTTA GC TAAATC TTTA CTAGAAGAAGCTCTGACTGAGCTT  
AACATGACTATTAAGGATCTAGAGAAA TATCC TCTTACCTTTTC CGCAACGTCTACTGTGAACTC ACAGA  
TAGCTCAGATGTTGCGGATCAGTGGCGAAGAAG TTTAG GAAT TAC TTTCCCTATCTGCGG GAAA GAATA  
TGC CAAA TTGCAAAACGATCTAATAGGCAATAC TTTCTTTA TGCTATAGGTGGCTGG CAAA CCGACT TT  
TC TGACCC TTTA GCG TTTCTTTT CAT TTTCTCCTC GAAA GGAGT CAAACCTTATGC TTTACAAGATCC TC  
AA CAAA ATCAACTG ATTC TCTCTATA GAAA CG GAAA AAA ACCC TCAAAAACGCTCAGC TTTAA TTTTC CGA  
AGCTTCTCTATACATA GAAA GACAAAACGTCATAGA ACCCCTCTATCACGACGTGTTCCATTATACAACA  
AATAA TAAA CTTTC TCAAA TTAGACTAC ATCC TTCAGGCCTAGTTGATATGCGGTATGC TAAAA ACTCT T  
AAA AGATGTT TTTA CTC CGTGCCTA GAAA AGATTC TCTC TTTAAA ATGCGGAGAGGTCTTGTCTAGAGAG  
TGT TAAA TTATCACTC TTGGCAAAGGCCT TTTA TGT TTTCAACTTGTATCTGTGATTAGATCGCAATAC  
AATATACAAAGGAATCTACTATGCTCAGCTACATA TAAA GAGGCGGCTGTTGTTTAA CAAACTTTCTTTATG  
GGTAGTAGTACTC TAACGTTT TTTA TTATTAAGACGATCC CCGGAGATCC TTTA ATGATGAAAACGGA  
AA CATCC TTTTC GCCA GAAAC TTTA GC ACTAT TAAA GAATCGTTAC GGGTTAGATAAGCC TTTA TTCACCC  
AGTATCTTATCTA CAAAAATGCTGCTAACACTAGA TTTTC GGGGAATCTCTTATCTACAAAGATCGTAC  
TGTGATCAGTATTATTGCTGCCGCTCTTCCATCTTCCGCTATTC TTGGACTT GAAA GCTTGTG TTTATCC  
CTCTTCGGAGGCATT ACTCTTGG AATTC TTGGCAGC TTTCTATA TAAA AAAAGCTGCGGCCGAACCTAT TTTCT  
TTTC TTCTGTGATTCAGATATCAGT ACCCGCC CAAA TTATAGGAGCCTT TTTA CAATATGTT CAAA CTAT  
AAA ATATTC TTGTCT ACCCATAGCTTGCTGGGG GAA TTTTC TCTCACACCTTATTGCCCTCAATAGC TTTA  
GCAATT ACTCCTATGGCATTCAATT ACTCAGCTAACCTATGCCTCTG TTTTC CGCAA TTTAAAAAAAAGATT  
ACGCTTATTAGCTTACGT TAAA GGACT TTTTC CCT TTTAAGGTGTTAA TAAA ACACAT CAAA CCCTACGC  
TTTATTCCTGTGA TTTTC GACTCAGCT TTTTC TTATAACAAC TTTA ATGACTGGAACCTTCTCTATAGAA  
AACCT TTTTC TGC ATCC CCGGTCTTGG GAAATGGTTCA CAAA CAGTAT TAAA CAAAGAGACT ACCC TATCA  
CCTTAGGACT TTTTC TGTGT TTTA TGGAGCCTTT TTTTC ATGCTAACTTAC CAAA TTGCGACCTTCTGCAAGC  
GTGGATAGATCCACAAATTCGTTATTC TTATGG GAAA GAACGTTTC TAAATAATAA TTTAATAAAGGATTT  
CTAAA ACAAACTC ATG TTTTC GATCTAGTTCGCTCATACTTGGCGCTAC ATTC GTACAAACAAAATGCTT  
GTATTGGGCTGTCTAAC TTTA GCTGT CAAAGTCTTAGCCGCAACA TTTCTTCCCTACC TTTATCC TGATT  
AC GAAA GAACT TTTTC CCGAACATGCTCTTCAGTCTCCGAGCAAGGCG TTTTC CT CAAA GAACAGATAA TTT  
AGGCCGATGCATGTTGGCTCGA ACTC TTCAAGGC ATCC GGCTCTC CAAA CTCATCGCAGTCTCTGTACA  
ATTATTGACGTATGCTTGGGACTACTGTGGTCTACACTAGCTCTTGCCAGTG GAAA AAAAGTGGCAGATA  
TTATGAGCC GGAT TACA GAAAT CAAA TTTTC ATTC CGCGC ATTC CTGTCAATTATTC TTTA TTAGTTAT  
T TTTA ATCACG GAATCC TTCCCCTTAT TTTAGCAATGACAATAACTGGCTGGATTC CTATAGCTCGTATT  
ATTTATGGTCAGTT TTTA CTGTTA GAAAATAAA GAG CAAATGTTGTCTGCTCGAGC TTTACAAGCATCAA  
CG TTTCA TAT TTTA GAAA ACATCTCCTTCCAATTC TCTAGGGCCAATTA TTTTC TAC TTTAATT TTTAC  
AATCC CTAATGCTGTATACACAGAAGC TTTTC ATCAG TTTTC CTTGGACTGGGAATACAACCTCCTTACGCC  
AGTCTGGGG ACTC TTG TAAAAGAAGGC ATTCATTC TTTAGCTTACC ATCC TTGGCTCTCTTTA TACCTT  
CGTTT TTTATGATCATTGTCTCTGTAAGT TTTA ATTGTATAGGAGAAGGTCTACAAACCAAATGTTAGA  
GGAAA ATACCC TTGTCTGAAGA TTTA TAAAAATGACAATCTAGTCGTCTCCG TAAA AAATTC CAATCA  
ACGATTAGTCAATCACTTGTGCTCACTATCAAGCGATGCCAAAGTATGGCACTTGTAGGA GAAA ATGGT  
TCGGG GAAAACAACCG TTTCTAAA GCAGT CAAA GGG TTTTC TCCCGATAATTGTTAC ATCC AATCTGGAA  
GAATCC TTTACTC CAGCACAGATATTACACGCTTATCTCGTAGACAACCTCAAACA ATCC GCGGGAA GAA  
AATCGCAACTAT TTTTC CAAAATGCCATGGGAACCC TGACTC CTTCTATGCGTGTAGGAGCTCAAATTTGTA  
GAAA CCC TAAGACATCA TTTTC GATATGTC TAAA GAAGAAGC TTTTC TC TAAA GCAAGAGAAGCTGCTTGGA  
GTGTACACATC GAATCC CCTGATCGATGCCTACAATTAT ATCC CAAA AGCTTAGCGGTGGCATGTGTCA  
ACGAGT TAGCATTGCTATTGCTCTGGCAACCAATCC GGA ACTC ATTATTGCAGATGAACCTTCAACAGCG  
CTAGATTC TATATCC CAGGCTCAGGTATTGCGTGTACTGACACAAAATTCACCAAACCC ATTC TACAGCTC  
TACTACTCATCACTCATAA TTTA GC TTTAGTATCTGAACTGTGTGAA GAAA TGGCCATTATACGCTATGG  
GGAGATCGTTGAGCAAGGTCTGTGCAAGAGCTACTGC ACTC TCCGTCTCATCC TTAT ACCCAGCAACTG  
ATCC GCGCTATTC CTAG AATTC CTAGTCTAGCTATC TTTTC ACTACAGAACCTCTTGAACAACCGCGT

ATTAACCTTTTAATTAGCTATGTCTACGTTAGTTTC TAT TAAA GATC TTTCTCTTACTATTCGCAAACAA  
CCTATCAAAAGAAACGTGCATCTTGAAATATGTGCGAGGAGAATGCCTAACAAATAGTCGGAGCAAGTGGAT  
CTGGGAAAACCTCTCTAGCTTTTAGCGATCAAAAGGATTACTGCCTCCAGATGCTCAAGACTCGATCGATTT  
TCATCTTCCCTCCAAAAACTCCAAGAAC TAAA GCGGTGCAGATGA CAAAGCAAGATGTCTATAGCAGTCTC  
AATCCCATGATGACTATTCAGAAA TCATTGCCGAACCACTACACATCATGGGGGGTCTTTCTAAAAGCC  
AACAGCAAGAA GAAATTGCTCATGCATTGAAACTGGTTCATCTTCC TAAATCATT TTTATC TTTACGCC  
TAA TAAA CTAAGCGGAGGGCAACGGCAACGCATAGCTATAGCAAAGGC CAAAGTGTG TAAACCG GAATTA  
ATTATCTGCGATGAACCTCTATCCGCATTAGATACTATGAACCAAAAATTGATTC TTGATTTATTTCAA  
CGATTAA GAATCAATATAACAATGCTTT TTTATTCATC ACTCACGATATGTCTGCTGCTTACACTTTAGC  
TGACAAAATAGCTGTTATGGACCGTGGATATTTA GTA GAAATAGCTTC TAAACAAGAGATCT TTTCTCA  
CC TAAA CACATAAAA ACTCGTGAGCTTCTTGATGCTATTCAGCT TTTACTTTC TCTT CAAAATAATCTA  
TCGTTATCCGTGAGCTC CAAATTAATGCTTTTT CAAATCATAAA TCTATAATAGCGCTGCACGCTCTCGA  
ACTGTTATCT CAAACGTGTCAACTTAATGTGG TTTAGATTCGCCTTATCTGCTTAGACTCCGAGCTCCAT  
GGTCGTTGCTCGCTACGGCCTGCTCGT TTTCTGAGAGT CCTTCCCTCCGT GAAAGGCTTGAAGG CAAACA  
CTCATATAGAGT TGTGACAGAAGATT CAAAGCATGCTACGACCAG GAAACAATCGATTATTCACAAATC  
TTCAGAACTGGAGT AAC CAAACGATG GAAATCTCCCATAT CAAAGAAGATCTCG TTTACGACAACGGG  
TTCTTCC TAGAGAAGCCATAGAAGCTGCGATCGTCAAGCATCACC AAATCACTCCTTATTTACTCAAGAT  
CAAA GAAGAAGCTATTGATCATGTGTCTGATATCATTGATGACGACTGCTATCAAGGCCATCTTTATGCT  
ATGTACCT TTTAGCGCAA TTTGAGAAACTC GTGCTCTTCCGCTCATTATTAAGTTATTCCTCT CAAAAGC  
AGGATATCCCTCATGCAATTGCTGGGATGTGCTTACAGAAGATCTCTCCC GAATCTTAGCCAGTG CAAA  
TGATGACGTTGCTCTT ATCCAAGA ACTCATT GAAACCCCTCAG TAAATCC TTATGTGCAAGCCGAGCC  
ATTTCTAG TTTAGTGGCTCTCGTCGGCTCCACAAGCTTTTC CAGAGAAA CAGCTATTCGTTATTTTCGGAG  
AATTACTTTAATTATCGGCTAGAAA AAAAGCCTTCC CAAACTTGGGATAGTCTTGTGCTTCCACAAAAGC  
TC TTTATCC TAAA GAAC TTTTTTA TCC TATTAGCAAAGCTTTTTCAGCTGGTCTGATAGATACATCTTTT  
ATCAGTATGGAAGATGTA GAAACCATTATTCACGAA GAATCCATTGATTCCTTGCT TAAAAGAAGTCTTCT  
CCTCCACAGATCTTATCAACGACACTTTTAGAAGAGATGGAGAAA TGGTTAGAAA GATTTTCCT CAAAAGTC  
ATAGTT TTTATCCAGA TAAAATTATAGGGAGCCAT GAATAAA CACAAACGCTTCTTATCGCTCGTACTCT  
TAACA TTTATCC TCTCG GAACAAA GTTCTGCCCGC ATTCGATCTCATCGACTC CAAAGCGTGGCACTT  
ACAAA CGATATTTA CTACGACTATTATCG GAATCATTGTACA ACCCGCTCCTATGGGAGCCATTGTTATC  
ATGGGCA TTTCTCTCTGCTTGTGACCAAACATTA ACTCTAGATCAAGC CAAATCC GGATTTCA TAGCC  
CTATTGCTTGGCTTGTATTTCTTTCTGT TTTCCATAGCAAAGGCGTGAT TAAAACAGGTCTTGGAGAGCG  
AGT TGCCTTACTTC CAAATAAAA AATATT GGGTAAA AGTCC TTTAGGAT TGAGCTATGGCTTAGTCTTACA  
GACTT TTTATTAGCACC GGCAATCC CTAG CAAAACAGCTCGCGCTGGAGGCATTC TTTCCCTGTCGTTA  
TGGGATTATCAGAGTCTTTCCGGTAGTTCTGTAGAAA AAGGCAGC GAAA AACTTCTCGGATCTTT TTTAAT  
CAAAGTAGCTTATCAAAGCTCTGTAATTACAAGTGCTATGTT TTTACTGCTATGGCTGGGAACCC TATT  
ATTTCTGCCTTAGCAAGTCAATTC TG GAGTAACGTTAACATGGGCAA CAAAGGC TAAA CCGCAATCC TTC  
CAG GGAT TATTAGCTTAGCCTGTATGCCT CAAATACTC TTTAAA CTATTC CACCACAAATAACTAGCTG  
TGAAGAAGCTGTAGCAACTGCCAAA ACTCGCT TAAA A GAAATGGGCC TTTAAA TCAAGGCGAACGCATT  
ATTC TTTAATCT TTTCTCTTTA ATATCT TTTA TGGAC TTTCCGGAG ATTC CATCGGCATCTCAGCAACAA  
CCACAACATTTA TAGGACTATCCCTACTCATTCTTAC GAATATTC TTGATTGGCAAAAAGATGTTCT TTTCC  
TAACACTACTGCATGG GAAACC CAAA TCTGGTTCGGAGC TTTAATTATGATGGCTTCCCTTCC TAAGCGCT  
CAAA GGTTTATTC ATCAAATAGGAGATTCTGTTATTGGGAGCGTTCAAGGTCTATCTTG GAAAATAGGGT  
TCCCTATACTC TTTCTTATTTATTTCTACTCTCACTATCTA CAAACGAGTAATACAGCACATATTGCAGC  
CATGT ACCCTATC TTTCTTACAGTATCCATCTCCTTAGGCGC GAATCC TATG CAAA CTGCCTTAGCCTTA  
GCT CAAA CTAGTAA TTTATTCGGAGGACTCACACACTAC GGATCTGGTCCAGCTCCGTTATAC CAAAGAT  
CCCA TTTCTGCTCCGTGCAAGAATGGTGGCGCTCTGGC TTTATTC TTAGCATAGTCAATCTAACCACAAA  
GTTG GGATTAGGAAGTTGGTGGTGGTACTG TTTAGGAT TAATTCGCTAACGTG CAAAAGCAAAAAGCTTAT  
GTCGTC GAATAAA CATGCTTCTC CAAATCAAAGACGCCTTC CAAATGTCGGGAGCTTCAAAAAGCTCCT  
GCTCTTCTATTAACAGAAGACATAAGG TTTAAA GCTCTTCTTAATGAACGCATTG ACTCTGTTGCAGAAC  
TATTTCCATGCACTTATA ACTCTCCCTACTACAAA TTTATTTCC GAAGTCCGATC TTTCCGCTGAGACC TT  
TCCCT TAAA GTGGGCGTTATGC TTTCTGGAGGCCAGCTCCTGGTGGGCACAATGTCATCTTAGGAT TG  
CTACACAGTAT TAAA AAGCTCC ATCCGGATAGTCAGCT TTTAGGAT TTTATTCGCAATGGAGAAGGACTTC  
TCAATAATAACTGTAGAAA TCACAGAT GAATTCATTGAAGAG TTTCTGTA ACTCTGGAGGC TTTAATTG

CATAGGAACAGGTCGACTAATATCATAACCGAA GAAAACAAAGCGCGCTG TTTA CAAACAGCAAATGAA  
CTC GATTTAGAT GGAT TAGTGATTATTGGAGGCGATGGTTC GAAT ACAGCCACGGCG ATTC TTGCT GAAT  
AT CAAA CTAAGCATCAAGCAAAAACGGTATTAGTTGGTGTTC TAAA ACTATTGATGGAGA CAAA CAGCA  
CCTATT TTTAGACCTCACA CAAA GG CAAAATACTGCTAC TAAA TTTATTCATCC ATCATCAGCAACA TT  
TC TAGAGACGCATTATCGTG TAAA GGCCACTATCAT TTTAT TAAA CTAATGGGCCGGTCTTCTCTCATA  
TCACGCTA GAAT GCGCACTACAGACTCACC CAAATATTGCTCTTATAGGCGAAGAGATTGCAGAAA AAAG  
CATCTCCTTAGAAA CATTAA TCC ATGATA CAAAT GAAA TAATAGCAGATCGAGCTGCTATGGG GAAA TAC  
CATGGCGTT ATTC TCATCC CTGAAG GAGT CATT GAG TTTATTC CT GAAA TACAGTCTCTGGT TAAAGAAA  
TT GAATCCATTC CAGAGCAGGA GAAT C TTTA CCAAGC TTTATTC TTATCTTCTCAGCAACT TTTA TGCCA  
A TTTTC CGGAAGATA CAAA CCATCAGCTCTTGTATAATAGAGATGCTCATGGCAACGTCTATGTATCAAAA  
ATTAGTGTGTA TAAA CTTCTGATTC ATCTAGTTCGTCAACA TTTAGAAA CACAT TTTAGACAAGTTCCCT  
TCAATGCAATCTCCCATTT TTTA GGTTATGAAGGGCGTTCAGGA ACTC CTACACAT CAAAATAATGTGTA  
TAGCTATAACTTA GGAT ATGGTGCTG GGGT TCTCGTT TTTA ACCGCTGTAAT GGGT A TTTATCC ACGATC  
GAAGGTCTAACTAGCCCTATT GAAA AATGGCGATTGCGCGC TTTA CCC ATTGTTTC GAATGTTGACGACCA  
AGCAGGG GAAA GACAG TAAA CATTATCC TCTGATAAAA AAGATGGTAGATATTGCTAGTCTGTT TT  
TAATAAGTTCTCACTGTATCG GAAA ATCTGGGCT TTTA GAAGACTC CTATCGC CAAA TAGGGCCATTACAA  
ATAC ATTC TCCGGAG GGATGCTCATTCTGATGAT TTTCTCC TTTAAT CAAA TT CAAA AATCATAAT GAAT  
GGCAAAAACGCTGTTCTA CAAATTTAGAAATCC CCGATCAGGAT TATTAACCATCTCAATGGACATAACT  
AAA GAGCTTCCCTT CATTATGATGCAACAACCTCATTACTTCCCTC ATTC AAAAAAGATCCAAAAAA TAC  
CTCTATTAGATAATGTGACTTCTCTAG GGGT TCTGCAT ATTC CTC ACTCTCAAGAAA AAACC TTTCTCT  
TGTTATCGTGTTGCAT GGGT TAGCTTCTAGCAAAAATTGGAACCAAACGTTCCCTATCTCCATCTAGCTAAT  
CAACTAGTACAAGAAGGTATCG GAGT ATTAC GAGT TGATCTCCAGGGCATGGTG ATTCGGAAAGGATTTA  
TCC AT GAAT TTTTC CTTACC GATTAT ATTC AAGCCTCTCAAAAAATC ATTCAG CAAA GTCTTTTC TCTGCC  
TCAAGCCAATC ATTC TGTGCTTG CAAAGCTCGTC TTTA GGAGGCAGCTTATCC CTACTGAACCTTCCC  
TACTTCCCAGAG ATTC AACATGCTGCTA CAAA GACTC CTACAATCC AAGGGGC TTTA TGGTTAGAAGACA  
CTATGCAGTCTATGTGCCCCCTCTCTCA ACTC CCCCCTGATAATT TTTCTTATCAAGGT ATTC CTCTGG  
GAAA AAATTC TGCTCAAA TTTA TCGAGCTCGATACCGTAGATGCGC TTTTC CAAAATCACGCAAGAAG TT  
TC TATTC TTTA CTTACAAGGCGAAGACGATGCCGTTGT ATCC TTACGTCATCAAGCTCTT CAAA CAAAA  
CTTTACAGGCAAAGCTTCTATCGCACATATCC TAAA ATGACTC ATCAGC CAAA CATATACTCCGAAGC  
TTTTCAAGACCTTGTGATTGGC TAAA ACATCAATTATTGGGCACACCATGGAGCT ACTCTCTGTAAA TA  
AGAGCTAC CAAA AACTACAAGACTACACTATCGTCCAGATACTCT GAGTCTATT GAATAGCTTGTGTTTC  
GATGCAT ATTCAG GAAA AGCCTTCTTCCGAACCGGCTTCAGACAAA CTAGCTAAGCAT ATTC CTCACCTA  
TGTGCTCTCCAGACCTC ACTC TTCAAAAAGATGCTCCTTCTTCTGAGCC TTTA CGTATCG GAGTTT  
TA CTGT CAGGAGGACAGGCTCCTGGCGTCATAACGTAGTCATC GGATTA CAAA AAGGATTACGCGCTT  
TAA TAAAGAAA CAAAGCTCTTCCGT TTTAT TAAA GGCCCTCTGGACTT ATTC GAGGATTATATAAGGAT  
CTAGATATCTCTGTTATCTATGATTATTACAATGCTGGA GGG CAAA ATATGCTCTCTTCTAGCAGAGAAA  
AAATCAAAAACAAAAGAACAGAAGAGCGCT ATTC TTGCTACAG TAAA AAAAAT GAAA CTC CACGGTCTGCT  
CATTGTAGGAGGAGATA ACTC CAATACAGACACTGCAATGCTAGCA GAAT ATTTA TCGAGCATAAATGC  
CCTACAGCAGTTATTGGTGTCCCTAAGACTATCGATGG GA TTTAAA AAACGCTT GGATA GAAA CTC TT  
TAGGA TTT CATA CATCTTGCCGCACTT ATTC T GAAA TGATCG GAAACAAAGAAA AAGATGTTCT TTTCTAC  
TC GCAAATACCATCAT CAAATCAAATGATGGGT GAACAAGCTTCTCACAGTACGTTG GAAT GCGGTCTT  
CAGACACTGCCTAATATT ACCC TAATAGGAGAAGAAGTTGCTGTTCAACATGCCTC TTTACAAAGCTTAA  
GTCTCAGTATTGCTCAA GGGT TGATCGAGCGC TTTTC ATAGAGG GAAA GACTACAGTACT ATTC TCATTC  
TGAAGGCTTAATCAAACAAATCC CTGATACAAAACGATTAATCC AAGAAT TGAACAC TTTAATTGCTGAA  
GAACAAT TTTCTGTT CATAA CAAA GACCAACAAT ATCCCCAATGGCTATC GAAA C TTTCTCTTCTCTC  
CAGAAA AT ATTC GAGACCAATTACTTCTAGATCGAG ATTC TTATGG GAATATTCGGGTATC TAAA ATTGC  
CATTGAAGAGCT TTTAGCTTC TTTA GTTAGCAAA GAAA TCTCTAAGCTTGAACCTACAATGTCTT TTTCT  
CCTGTAACACAT TTTCTAGGATAC GAAT CTCGAGCAAG TTTTC CTTCTAAT CAAA ATTC CAATTATGG TT  
TAGCAT TAG GAATAGCTGCTTCTCTCTTCTTAGTAAGAGG GAAA ACA GGGT ATATGGTACGATAGGCAA  
TCTAGCA GAAA CTTATACC GAAT GGACCATCGCAGCG ACTC TTTA TACAAAATGATGCACTTA GAAA AA  
CGGTTCAATCAAGAG ACTC CAGTAATCAAAAAGATTCT TGATCTCCAGATGCCCCATGGCAAAAATA TT  
TA CA TAAA AT GAAA GAGATCTG TTTA TTAGAAG ATTC GTACCG ATTC CCCGGACCGTTACAATA TTTTC GA  
AGAACAAGCTCTTGTGATCAGCGTCCACTAACATTAC CAAA G GAAA AAG GAAA ATTATCGGA GAAT AAC

GCGACAAAATTC TAA GAAAACAACAG GAAACTGTGCGGT GAAA GCTAGAAGAAT CATA GAAA CGAGGAGAT  
AGCGGTAGTCGACTTGAACCAACGACACGC GGAT TATGATTC CGTGCTCTAACCACCTGAGCTATAACC  
GCCTCAAACAATC TAAA AAATTAGCGGGAGAA GGATTC GAACCTCCGACC CAAA GGT TATGAGCCCAACG  
AGATGACCACTACTC TATCC CGCGGTA GAAAGTCTAAGATTATCAC ATTC TTAGAT TTTC ATGCAAGTAA  
CAAA GCTC TTTAATA TTCCCATGTCGTGTT GAAA GCTAT TTTC TTCCTGCTTCAAAAAGA TTTC CCCTT  
TTCAATATAAGCTTGGCGGTTTT TTTC GT CAAA AAGAAGATCTGTA ACTACATC TAAA AGAG TTCCAAA  
TTCACA GAAAGTCTGCTTCTTT TTTC CCGCAACC TTTC AGCAAGAACAGATTG GAA TAAA TATAAGGTC  
CAAACATAAGAGGGCGCCTCTT CAAA AAGAGGCTCTAA TAAA TTATGCCCCTCCTACAGAT GGATC GAAA GT  
TCCTCTACAAATGCAATATCTGTGCA GAGTAAA TATCTTTTA AT ACCCCCATAGCGTCCATAAT TAAA  
GAAT TATATTGCCG GAAA GAAGCACCTTGACTC CATAATCCAAA TAAAATCC CAGCCT TTTC TAGTAGCT  
TAGCATGCTCC TTTA ACTTCTCAAGATGTCTAGGA ACCCA TAAA ATT CAAA TAGAA GAATTGTG GAAA TG  
T GAAA CCACTTCAGCCCATACCTCTACATC TTTA GGATGCATAGA ACCCAATACAATTAAGCGATCC TGA  
GAAGATA CAAA TAAT CAAA CTCTCCAAAAATCTCGGCGA CAAA TGGCAAGAGA GGATTCTATAAAA CGT TT  
TCATG TTTC CAGTGACAT GAAT CTT ATCCGAG GAAA TACCTATCTGCA TAAA CCGTTG TTTA TACAGCTC  
GTCTTG TAGTATCAA TAAA TCTAACGGAGCAAAAATA ATTC CTTCCTAACC GCTTTAAA AAAAGAAA AACGC  
TTACAA GAATGTTCC GAAAG CAAA CCATTAATCAAAAAGGCT CAAA CCCC TAAA CG CAAAGATTCTGTCA  
AAAAATGTAACCAACAGTCTCCTTCT GAAAAGATCACGATATCAGGAGCAAGCTTGC GAACCAC GGATTT  
AATAATACA ACT TAAA TCCAGAGG TAAA ACAATACAGTAGCGCCAAGAGATTC ATACAAACGACGAGCG  
GTGTGCACACCAGCTT CAGAACACGTTGTAACAACAAACC GCC ATTC TG GAAA CTCTTCTCTCCATCGAT  
TAAGAAGGGGAGCCAACAGACTGACTTCCCCACAGAAGCTCCAT GAAA CCAAAC TAAA GGGCCTTCCCC  
TTTC AC GAAA GG TTTC TGT ACCC CAAACC GAAT TTTC CAAGAGT CAATATA TTTC CCATG GAAA AACAC  
AAATAAAA AAATACGTGGCGCC GAAA CAAAAAAGCGAAAC TAAA AACGCATCATAGAGACGAGATGTTA  
ACCAACGTCTTATCATAACAACAAAG TTTA ACCAGTCGAGCAGGAACAAAAATAGCCTT TTTC ACTTCACAC  
CCCTCTAAGTACTTAGATGCAGATTC CTTTGCTAACGCTAGGACTTCTTCTTTA GAAGCATCC TTCATAA  
TATCTAGTCGAGCTCGAAG TTTA CCA TTTA CCTGA ACTACAATAGTA ACTGTCTGTTCTTC TAAA TACTC  
AGGCAAAAC ACTC GGC ATCC GGACTTCTGAACACCAGGAGAAT TGCCTAACAAAC ACCCACA ACTCTTCA  
CTAATGTGAGGAGCAAT TGGAGCCAAAGCCC GAACAGCCATTTTC TACAGC ACTC TTC GGATATACAGCGA  
GCTTCACAAAGTCATTGA TAAA CTC CA TAAA AGAGGACGGTATCGT ATTC CAAAGACAATTTTTC AATAGC  
ATCTGTT ACTC GCTGCACAAGCTTATGCGCTAATGATAAGCCTTCAA AATTGTTATCTTCTTAACTCGA  
TCAGAAGAGACCA TTTC ATAAA AACGATTC AAAAAATCGTCTGCAACCAGCAACTC CTTGGTTAGACCAGA  
GTTTA TTTTATCT TAAA GGCCTT GAAA ACATTGCGTAC ATCC GAACAGCGTCAGCTCCAAATTC ATCTAT  
CAAGATCTGAGGATCCACCCCA TTTA ACAAAGATTTTC GACATCT TTTC TTGACGGACATCCA ACTC TTCT  
CCCGAAGGAGCA ACCA TTTC CCGT TTTC TTCT CAAA CTGTTTC AGGATATATATCC TTTC CCAGGAA  
TGGGATAAGATGTG CCAATACCAAGCCTTGATTGACAAGCTTCT TAAA AGGCTC GGGTGTG GAAA CAAT  
CC CAGCTTCATA GAAA ACCTGATGCCA GAAA CGCGCA TAAA GTAAGTGCAGTACAGCATGTTCTGCACCT  
CCAATATACAGATCTACTGGC ATCC AATATTGTTCTT TTTC CAAA CCCAGGGAGCGGCC GAGT TGTGGG  
CATCGCAAAAACG TAAA TAGTACCAGCAAGAGCCTGCCATTGAGGCATGGTATGTG TTTC ACG TTTC CC  
AGCTCGTTGTGTCTCCGTGTC GAAA ACTTGT ACCACTC TCGCACCTTAGCCAAAGTCCCTTGTCCG ACC  
CCTTCTGGTCGATAATCTT GAA TTTC CGGAGGTAACAATGGAAGTTCATCGTCTCT TAAAGGACGACAAG  
AGCCATCTTCAA AAT GGAT AATCGGTATAGGCTCCCCCAATAACGTTGACGCGA GAATAGCCAGTCTCG  
CAACTTATAAGCGATT CAAACTGCTCCAAGATGATTC TCTTC TAAA AAGTTAATCACATATTGCTTAGCT  
TCTTCTCCGGACA ATCCATCC AAATGGA ACCC TTCACAACAGCTATTAATACAGACACCTTCTTCATTAA  
GCACGGAGACTACAGG TAAAT TAAA CTGTTCCGGCAAAAAGCAAATCACGTTTCGTCATGAGCAGGAACTCC  
CATGACAGCTCCTGAACCAAAGCCATTAATACATAATCTGCG ATCC AGATAG GGAT AAGTTCTGTGAGTG  
ACAGGATGT CAAA CGTAAG ATCC CG TAAA GACCC CACTCTTAGT TTTC ATCTCGCTGATGCGATCTC TTT  
CGCT TTTAC CAAA TG TTCTTTA ATATACTGTGCCACAACAGCCT CAAA ACTCATCAGAAGTGAGGAGATC  
GACCAAG GGAT GTT CAGGAGCTAAGGC TAAAAA GAAA CTC CTATCAAAGTGTCCGGTCTTGTGTGTAAG  
ACTTCTATTGCTCCATGTTCTGTGGCAAATTAACAGAAGCTCCTGAAGACTTCCCAATCCAATTC TTCT  
GCAATTG CAAA ACAC TTTC TGGCCA ATCCAGCTCATCTAGTCTTCTAGGAGCTGATCCGCGAATGCTGT  
AATACGCAGCACCC ATTGGCGAAGCATCTCC TTTC AACAGGATACCC CCCATCAACA GAAA ATCC GT TT  
TCAATCTTTC ATTC GA TAAA ACAGTCCCCAACTC AGGACAATAGTTAACAGCCATATCGGCCATATAGG  
CTAATCC TTTC TCA TAAA GGAT TAAA AAAAGCT CAAA AGTCCA TTTA TAATATTC TGATCTGAAGTAGC  
GAACTC TCGAC TTTC GTCGTAAGAGA ACCCATTGCAGTTAACTG TTCTTT GAAA TTAGCGATGTT TTTC

TCTGTGGTCTCTCTTGGGTGTGTCCCCGTGCGTATAGCATACTGCTCTGCAGGCAACCCAAAACCTATCCC  
AACCCATAGGATGTAAAACCTGAAAACCCCTGGGCTCGCTTACACCTTGCACAATATCTGTTGCTGTATA  
GCCAATTAGATGCCCCACGTGCAAACCTGCCCCAGATGGATAAGGAAACATATCTAAAACATAGTATCAA  
ATTTTAGTTTCATCCCTCTCAGCCTTAAAACCTTGCTCGTTCTTCCAAAACCTCAAAACATTTTCTTCTA  
TGAGACCGGATCATAGCGCATAGCACCTAACCTGTTGTTATTTTTAAGGTTTCTCTCTTACAACCGC  
CTTGCACCTAGAGAATAAGCGTCAAACATACACTATGTCTGAGATCGAAAACAAGTCTCTCCAGTC  
TGCGAATCCATCATCTTTTTTTTAAATGCGATCCGGTATACACTTCCCCTTCCCAATCTTTACAGAGAT  
CTCTGCTTATGTCCCACCTCTTCTCTAAAACCTGTCAATATTTTCAGGAGGAGTTAATTCCTCTGTTAG  
AGCGTGTGAGCCGTTAATATCACTCTCTCTATAGTAGCTCGTGCCCTTAAAGAGGTTTTATAGATTCT  
CTGGATAAAACGTTTATAGACTCAATGGATCATGGGATCTCTTATCCATGGACATAGTCAACCTAAGA  
CAATGTCAGCTATCCGACAGGGCTTAGAACGAGGAAGTTCTTATGGCCTCACGTCCGAACAAGAAATTC  
CCTAAACCGAAGAAATTTTTCGTACAAAGGATTAGAGACAACTACAAATTCGCTTCATGTCCACGGGA  
TCGGAAGCAACTATGACTGCTGTTGACTTGGCTAGAGGTATCACAGGACGACCTATTATCATTAAGTTCA  
AAGGATGCTACCACGGCCATGCAGATACTTTTCTTCAAAGAAACCCCTTTTCCATACTTCGCTAGACAC  
TTTAGACCTCGCTCATCCCTCTTACCCCTCTCTTACCCCTTCAATGATTTCCCTTTATTTCAAACCTGTTATG  
AATAGCTTGGGGCATAAGGTCGCTGGAGTCATTCAAAAGCCTGTATGTGCGAATATGGGGGTGATTCCTC  
CCGTCCCTGATTTTATTGAAGGAGTTATCCAAACCTGCCAGCAGACCAGGATCTTTTTCATTATGGATGA  
AGTGGTGACGGGATTCGGGTGCGACAAGGTGGAGCTGCGGCCAAATATCATGTGAAACCTGATATTCCTT  
GTTCAAAGGAAATTTTAGGTGGAGGCTTACCTGCATCAGCAGTTGTTGCACCTAAAAGACATTATGGACC  
ATCTGGCACCCGAAGGAAAATCTTCCAAGCTGGAACACTTTTCAGGAAATCCCAAGCTATGATCGCAGG  
GAAAGTATCTGTCAACTTATGTGCGGAACAAGGTTTTTACACACAACCTCGCAACTATTGAGCAAAACCTT  
TTATCCCTTATTGAACACATGATTCGAACTACAGGAATCCCTGTTACATTGGTGCATATGGAAGCCTCT  
TTTCTTTTCTTTTAAACCAATAGCCTAACAACTTTCGGATGCACAACCTAGCGATATCGAAGCTTT  
TCAAAGTTTATCAATCTGCTTTCTCAAAGGAGTATATCTGTCTCCTTCTCCTCAAAGCCAGCTTT  
TTATCCGCAGCTCACTCTATGGAAAGTTTAGATTACGCCAAACCTGCATTGATAGAAAGCTTGAACAAG  
TCTTTTCTTTAGTTTAGTAGTAGATTTTCAGGAATGTGCGATAACGAAGCAAACGCCCTCAAGATGTT  
GGAGAACATCGGACCACATTCCTTTCGAGCATCAGTAAAATAATTTTCCTGACTCGAAGGAGCTAAGAA  
CCACAACCCCTCTAAAACCTCTTTTTCCTAACTGGCCACCTTGCCAACCACTGTATCCAAAACATAAGAGC  
ATCTTGTGTCACGAGTTCGCCCCCTCTTTTTCACCAGCAAAAAGAAATCTCCTCCGAGAAATACGGACG  
GACAAAATTCCTATAGAAAGAAATTCGCACTATCTGGGCTCGTATGCAACAACATAATCTGATTCGCTTGCAG  
AGGGCCTCCATACAAAAGCGAACCCTAAACTCATCAAATGATCTAAAGGAAAATTTTCTTCTGGCGAA  
TCAAATTCCTAGAATCAATTAAGAATTAACCCAAAAGATCCACAAAAGACTATGCTCACAAAGCAAACCA  
CACTTCTGAAAATAATGCCTCCATTAACATCTGGAGAAGCTACAAGCAAAGAACCCTAACTCAAAGGGC  
GTAAGGAAGTCAATCATAACATCTTATTGTAACAATCTAATCTTCGTATGGATAGCTTCATCAAAAAT  
GGACTTCACACAGAGAATAGGGACTTGATACTTAATTGCTAAAGGAATGCTATCACTGGGACGAGCATCT  
ATGTCAGCTATGTACAAACGGTCTCCCCGCTTCTGCTCTAAAACAATCGTGAATAAAAGACATTATCCT  
TGTATTCGTGAATGACTACTCTCACGACAGATAGATCAAAGCTTGTAAAACAAGTTGAGAACGTCATG  
TGTTGAAGGACGTGAGCGCTCTTCTTCTGCTGCCAGATCTTACGTTTCAAAAAAGCGGTATCCATTGAA  
GCGTGACCATAGATGGCGAAGTCTTTCCTGTCGGTTCCTAAAATAATCCCTGCATAGTTGCGGAACTTA  
CTAAATTTATAAAAATTAATTAATAATTAGTGAAGTGTGCTTATGATTTCTCGATCAATATTCATTATGTT  
CTTTTTCGGACAATAGAACCCTCGGCCTAACCTACCCACACCTCGGCTCAAACTATAACAAACCCGAC  
ATCAATAATGCCACGAACAAATAATAGTCTAATCATATCCTCTTCGGATTCGCATAGGAATCGGGTGTA  
CGCACATCGTAAATATAATTGCCATTATCCGTGAATAAACGTTCTCCTGCAGAAGTTCTCTCCATTCTC  
CAAAGTATCCCTGTTTATTCATATCCCTCTGTACAGAAGAGCAACCAAAGGAGCAATCTCTATAGGCAA  
TGAAAACCTCCCTAATGTGGGAACAAGTTTCTTTCTATCTACTAGAATAACATTGCGCTTCCCGCTCTGA  
AGAAGAATTTTTCCTCGGAAAGAGCTCCCCCTCTCCCAAAATCATACGTAAGCAAAGGATCAACTTCAT  
CCGCTCCATCCACGACCAAGTCTACATCTTGCAAATAAGGATGATCCAAATAAGGAATCCCACTGCTTC  
AGCTAATAGCTGAGATATCCTTGAAGAGGCTACCGCTGTGATTACCAAACGTTCTGTCCGAACACGATCT  
CTAAAAGCCAAAATGAACCTCTAGCCGTCGAGCCGCTCCCTAACCCACACACATTCCTGGCTCCACCA  
AAGCTACTGCCTCTAGCGCTAGTTCTGCTTGTATAGGAAAACAATACTCGGAAGAAAAGAGTCTCAGG  
TTGTTTAGACAATAAACTCTCAAAAAGAACTAAAAGAGGAGGGCTTCTATTCCTCAAACAGTAATCCCTAC  
AACCTCTTCAAGATTCCTTCAAAGCTTTATCAAGACTTAACCAAATAATGCAGGTAGAGCTCGTTTATT  
AACGAAAGGTCACCTACTCTCTGGCAGAATTCGTAGAGTCCTGAGTATTACAAAATAGTAGCTAGCTGAT

TC ACTT GCCCTACA GAAAAGACTC CTC GAGT ATACAAACCTAA TAAA AATGTAGAGAGA ACTC GTTCTAA  
GAGT TTTT TTTC TGATGAAGG TAAA AAGGTTCTCAA TTTC TTCTGCAAGCCTACTTGTTT TAAA GAAGCG  
CTTAACCACAAGA GAAT ATTGTCTTCGCA TAAA GGT GGGTAA GAAT C GAA TAAA GCTTGTAA TTGCTTAA  
TAACTTCAAGCATACTGCAAAATCAGCCTTGAGATCTGCAGAAGAAGCT CAAA CAATCAATCC TAAAAC  
CCCTGAAG GAAT TTTC TGGTC TAAA GC TTTC AACAAAGAGCTTAACTGCTC TTTA GGACTACCTTGACTA  
CCTGAAGACTT GGATTC AAATCGCTTAGGAAGAGCTCT TAAA CAACAGCCT GGAT CTATATCACGATACA  
AACAAGAGACTTCTTCACGTGACTT TTTC TTAGTCTT TTTA TCTTCTTCACG TAAA AC TTTC TGCA ACCC  
TGCAGCCCAAGCG GAAT CTTGT GAAT AACTACTTGC TAAA GCAAGAGCT GAAA TCAC ATTC CCTGTATCC  
AG GAAA TCA TAAA TACGA TTTC TTACAGAGAC ATCC TTATA TTTC TCAGCTACAGCAGTTGTGATATACT  
GATTGT ACTCC GGATTC CCCAAACACCAACCG GAAA A GAAA ATATTC AAT GAAA GAAGGGAAGCCTC TAA  
AGCTAGC TTTC TTTC CTTATTGTC TTTC AAGTC TTTC CTC ACCAAA ATCC CTTGGT GAGT CTTCTCAATC  
AAAGATA GAAA GGGAGCTGCAAA TTTC TTAGGAT CA GAAA GAGCTCCACACAACCAAACCAGCCCGTTAG  
GGAATCC GCCTTGAGGAGGCTGTAACATCTTCTCAGCATGACGCGTAATC TTTA GAAT CGGATTC TTGTC  
TGGT GAAA ATGATAC TAAA AAAACACCTGC TAAA TGAGAAGGTTCTATAGGGAAAT GGAGCATCTT TTTC T  
GTAG GAAT TAAA GCGCTAATCC CCTCACAGACAAAAGT GAAA TCATT ATTC ACTC TATCAAGATGCTGCT  
TATATTT TTTA TAATCTGTCCCAATTC CTT CAAA AAGAACACGCA TTTC AGCGCTTTT CAAA ATCC CAAT  
CCGATTAGGGAGA GAAT CATCTGCTTGTCCG GAAA TAAGCG GAAT ACTAGCACCACGTCCTTTA CGGAGA  
GTCC TAAA ATAGGTG ACTCC GAAA AGTGATCTTGCAGACCACT ACTC AAGAA TTTA ATTC GTATTGCAA  
CAAGCTTAGCATTAGCTATATATACCAAAAACGAAGCTGTTAATGCTACGATCGA TAAA GCAAAGAGAAC  
CCCTACAACAATTGAAGCTGCAACTGG GAATCC GGAACAGATAGAGCGACCACAAGCAACAATAATAAT  
GCTGCAGCTGCTACAGCAGAGACTA ACCCTATA TAAA TTGGC CAAA TCTGGACCGAGCCATGGCTCGATCAC  
ACT GAGT C T C TAAA AACT GAAA AACTC CTCTAGTA GAGT CGGGAGGAT TGAGAGGA GAGT CTGTTCCGAT  
AAA AACTAT TTTC TCTT TTTA ATTT TTTATTC TACACACATT GAAT ACCAAGGTTAT TTTA ATATAACTGA  
TCTTTA GAACGGG GAAA AATCGCAGAGTCTTTTC AT TTTC TTTA CCTCATCTTCTCAAAGATCTTAAC TAA  
AGACTC CAG GAAA GATCG TTTA TCTTGAGGTTTTC TCCTAC GAAATAAA TG CAAA CATGCTAAGAAA GAT  
TTA TAGACAATCTGCCATGTGCG ATCC GCTCTGACGGAGAGCGTGTGCGCTTT CAAAGGT TTTC ACCAT  
ATTTAAA ATAGGAGCATCTTC GAAT GACAACGATT CAAA ATCTTCTTGG TAAA GACCCGACTATCTCCT  
TAACCACAAGTGTGTTA TAAAAAAGAAGC TTTA ACCTTCCCTTCTGGAGACTTCGTATCAC GAGTT CAA  
ACAGAAT CAGACAGAAA TAATC GGGT GCTCCGTTCCCTTCAACAGATGTTT CAGTTATGGACGCTTAGGGC  
GAACAGGATACCTCTCT ATTC TCCCTGTTGACCAAGGTGTCGAACATACTGCAGGCGCATCG CAAA CCAA  
GAATCC TATGTAC CAAA ATCC A GAAA ATATCGTGCCTCTGGCTATGGAAGCTGGCTGTTCCGCTGTAGCT  
TCTTCTATGGCGTGTAAAGTATATGGCTAGACGATATGCTCA TAAA ATTC CTTT TTTA ACT TAAA C TAA  
ACCACAACGAAC TGTATCC TACCC GACAACATATCACC AAATCTTCTTCAGTCAAGTTGAAGATGCCTA  
TAATATGGGAGCTGTGTGTCGGAGCAACGA TTTA C CAAAGAT CA GAGT CTTCTTCTGAA GAAA TTGTT  
GCTGTTGCCGAAGCT CAAA CAAGAGCTAGAGAGCTTGGCTTGGCTACAGTGTATGGTGCTAT TTA AGGA  
ATCC ACAT CAAA TTGT GAATAATGT GGAT TACCACACTGCTGCCGA TTTA ACAGGGCAAGCGGACCATCT  
TGGAGCAAC TTTA GGAGCTGATATCGTTAAGCAAAAGCTCCCA ACTC TTCAAGGA GGAT TTTAAA ACAATT  
AA TTTC AGCAAGACTGATGATCTTGTGT ACTC GGAGC TTTC ATCAAACC ACCC TATTGACCTCTGTCCGT  
ACCAGTACTTAATAGTTACTGTG GAAA GGTTGGTCTAATTA ACTC CGGAGGCCCTTCTGGGCAAGATGA  
C CAAA CTGAAGCAGC TAAA ACAGCAGTAATTA TAAA CGAGCTGGTGGCATGGGACTGAT TTTA GGGAGA  
AAAGC TTTC CAGAG ACCC CTCTCTGAAGGCGTCCGGTT ACTCAA TTTA ATTC AAGATA TTTATTTA GATC  
CGACAATCTCCATATCATAA TTTA GAGGG ACTC ATGCATCATCGCAAATCTTCT ACCC CATTGGGTACTT  
TTA CTGTAGGGAT GTTATCC CTTGCAGTAGTTATCAG TTTA C GAAA CCTTCC TTTA ACAGCAAAACATGG  
CTTATCT ACTCT ATTC TTTA TGCTGTGCTGTAGCCTGT TTTA TGATTC CTTACGCACTGATTGCAGCA  
GAAT TAGCTTCA TTC AAACCACAAGGTA TTTA TG CAAA GACACGAGATGCCTTAG GAAA ACGCTGGGGAT  
TCCAAA CTATAT GGAT GCAGTGG TTTC ATAATATGACTTGGT ATCC CGCTATGTTAGC TTTC ATTGCTAG  
CACACTTG TTTA CCAAATCAGTCCAGATCTTGCCAATAATCGACTGTA CAAA TCATCC GTTATTC TCTTG  
GGT CAAA GGGGCTTACCTTC TTTA AC TTTC TGG GAAT AGGAACATCAGCACTA TTTA GTTCTATCTGTG  
TAATFTAGGAACTC TAATCC CCGGAGCCATCTTAGTTGCT CAAA CTGCTTACT GGATCC AAGGAGGCAA  
CCC TATCGCCATTA ACT TTTC TTG GAGT GAACTGCTTCCAGA TTTC TCTTCTCCTTCCCTCG CAAA TTCTA  
CTATCC GGAAT GCTACTAGCATTATGCGGGT TGGAAGC GAAT GCCAA CAAA GCTTC GGATATGGAAGATC  
CTAAA GAAA ACTATCC CAAAGCCGT TTTC ATAGGAGCTGTATCCACTC TTGCCAT CAAA G TACTAG GATC  
ATTAGCTATTGCTATCGTAATTC CAAAAGAA GAAA TTAG TTTAG TTTC TGGACTCATTC GAGCTT TTTC T



CTTTCCAAAAGAAA TACAACC TTTC TTGGAT GACAGGTATCATCGTAGCTATGACGATTGCCGGCTCTC  
TAGGAGAACTTAATGCCTGGATG CAAA CGGGAACCAAGGGGCTGTTTCATCTCTACTCAGAATGATTGCCT  
ACCGAAGATCTTTAA GAAAACAAA ACTC TAGGGAT GTTCCCACAAACCTCATGCTTTTC CAAGCGATCGTG  
GTTACCCTATTCACATTCATA CAAATTTATGTAGACTC TGCAGACCTAGCTTACTGGATTTTA AGCGCGT  
TAAGCGTGCAAATGTATCTAGTCATGTATA CAAA CAAATTCATAGTCGGTCCTGTACTCCGAATAAA AGA  
GCC TAAAGCTCAAAGAC TTTATTC TGTACCAGGAAA ACTTGTGG GAAT GTGTGTTCTGTCTACCTTAGGG  
ATTC TTTC TTGCTA CAAAC CAAA GAAT TAG TTTC CTCCCCCTCAAGAAGTAGTCTCTTT TTTC AACCA  
TGGGCGGCAAT CAAA GCTACACAGCTCTTCTGCT TTAGCT CAAA TCATTAAGTGTGT ATTCT CAAAG  
AATGTACTATTC TCACAA GAAA TTAAT TAAATAAA TTC CAAA CACA GAAAAGGGC CAAATAAA GAAGCT  
CTTTTC TTTC TAAGACTTACCT GGA TTTC TAATTC GCAAATC TTTAAA A TTTC CCTCATGTTTA CACTAC  
AATGTAGTCCATGGACAAAATTAGG GAAA CGTGTT GAAAG TTTA GTGCGCAAAGCGCTGTATACGCA  
TGCTATGTTACAAAAGCATAACGCGTATTGCTGTTGCCTT GAGTGGCGG TAAA GACAGCTTGTC CAAA CTA  
CTCATGC TAAAAGCCA TTTC TGGGAAGAGGATTC CCAGAATAACT ATCCATGCT ATCCATATTGGAGGGA  
AATATTC TTGCGGAGCGGCCGT CAGCGGAAT TATCTCTCTTCTA CAAATGATAAGATCCAAGTCCCTCT  
TATTTTC TATCCCTCCCTTAT GAAA CAGAGAATCC T GAGT GCTATACCTGTTCTCGTATTAGACGTGCG  
CTTCTT CAAAATACAGC TAAA GCGGTAGGAGCGACCGCTGTGCGC ATTC GGACATCACCGAGATGATGTTG  
TCCAACAACACTAAT GAATCTTCTCCA TAAA GCG GAACAAA CGGGCATGCTTCTGTGCGTTGACATGGT  
TAAC CAAA GGAT TACAATCC TACGCCCTCTTAT TTTC ATTC CCGAAGACCTGATCCG TAAACAAA CTAAG  
GAAA GCGGC CAAA CTC GAAT CACTTGTGTTGCCCGTTATTTTC CTTACGAACAAAACTGAAGAAGCTT  
TAAA AACCTTGGAAA CGAT TTTC CCTCAAGCAAGACATAATATTGC CAAAGCTGTTGAGAAA CAGGACT  
TTC CAAAGCAAATCGCGTAGAACAATACG ACTC CTATTAACAGAAA CCTAGTCT TTTC CTAGA TTTAAA  
TAAA AA TTTATATTAATCATAATACTTGG TTTA TT TTTC TTATTAT TTTAAA AAGATCTAATAGCTCATT  
GCGCAGGTT TTTA TGCGCAAT GAAA AGTATAAGAGGGGCTCATGACAGAGACACGACGACTTCGCA TTC  
TTATTACCAATGATGACGGTATCAAAGCCAAAG GAAT CAGTCTGCTGA TTTC TCT ACTCCGTGAAGCTGA  
CTTCGCCGATC TTTA TGTAGTAGCCCC TTTA GAAGAACAGTCTGGGAGAAGTATGCG TTTC TCATTAGTA  
GAGCCAAC TGCCCTTGAGCCT CAAA ATT ATCC TCAAAGAGT CCAAGAAGCTTGGGCTGTCACCGGC ACTC  
CTGTTGACTGCGT GAAA TTAGCTATAGGAGA ACTC TTTAAA GAGAACGCTCT GGAT CTTAT TTTA TCGGG  
TATTAATAATGGGAAA AATTC CGGACGCTGCC TTTA TTACTCTGCCACTGTAGGAGCTATAAGAGAAGCG  
AATCTCCATGGAATTC CTGCGATAGCTC TTTC TCAAAGTGAGAAT ATCGCTTT TTTC CAAGAAGCTCATA  
TGGCCTCCCTAATTC GTTCCTTATGC GAGTTTA CCGTTGCCTATAAGCACACCG ATCCCTTAGGACTTAA  
TG TAAATTTCCCGCTAGCGCGGACG ATTC TCCATG GAAAGGAATTCG TTTC ACAC TTTC TGGAAA TGAA  
TTCTTATTC GGTATCC CAAGATTAGTCCGTACGGAAG GAAATCGTCTTACTATACGCTCTATGATATGC  
GAGAT TAAAGTATCC GAAGAGT TCTCTGAAGAGT ATCTTGCT TTTA GCAAATAACTATATTAGTGGCTCC  
ACTAG TTTC TAAA AAT ACCCTCGAGCA ACCC TTTC CGAAGAAGA ACTAGC TTTC TAAAAGACTC TTTC  
GAACAATCTGTGTTGTG GAAA GCTTC TTTAAA CTAGAAGAAGATCTGGCTTAGTTATCTGTATGTT GAA  
ACGAAC TTCAACGTACTTT TTTC AGCAAGAAA AGCTCCTTCTGATTACAATA CAAGATCTTTTA CACCTA  
TAATCC CATAAT ATTC GAAGGG TTTA TGTCTAGGAT TGTATTG ATTC AGCAGCTTATCAAATGCAAATAT  
GC CAAACAAACAGCACTA TTTC TTGCATCTTCTACATTGTTCTGCT TTTC TCTCCCTGCA ACCC CTT TTT  
CTCTCT TTTC CTTAGGCTCTA TAAA AACGATCTCTCTAGGTGGAAGTGCATTT TTTA TCGCCCGCGC TTT  
AGGAAT GATCG TAAA CCAAGTTGTGGACTGTGCTATTGATAAA CGCA ACCC TCGCACCCAATCACGGGTA  
CTTCTGCAAGACTTC TTTC AAT TAAA C ATTC CATGCTGCTTCTG ACTCTCTGTCTT ATCC TG TTTC TAA  
GCACTTGTGGCT ATTC AATCC TC CAAACT TTTC TCTCGCAGCTTATCT ACCC TAATTATGATTATCTA  
CCC TTACACAAAGCGT TTTACG TTTC CAAATCACT GGAT CAAA GGGCTGGTATACTATCTAGCAATACTC  
ATGAAC TTT CAAA CCATCATTGAG ACTC CTTT TTTC TCTCTAT CAAA CATGAGT TC TTTATTAG GAATTT  
CC CAAA GTATGATCATTGCAAGCAATGATATCA TTTA TGCAGTCAAGACGTA GAG CAAAATCAAAAAGA  
AGGCTG TTTAGC ATTC CTGCTCGA CAAAGAAC GAAA CAAGCTATTACAATTGCTTCAGCTAA TTTAATA  
GCTAGCGCAATAGCTTACCTTCTTATGGTTAT CAAA TTCC GAA TAAA ACCATCTTCTATCTATGCTCGC  
TTGTGCC TTTA ACCGGT ATTC TTTC GCACAATTAAGCACT ATTC TCTTATTG ACCC AAGAGCTAAGTCTAC  
TC TTCAACAAA TTTC TTTC TTGGGAACC TTTC CCTAGGTATCGGTTT CAAA CTAATATGATTGGACTA  
TT TTTA CTAAGAG GAAT CTTATGAAGCGCTACGTGGT GGGT ATTC CGGAGCATCTGGTATTGTATTGGC  
AGTCACATTAG TTTC TGAAC TTGCCAGATTAGGACATCATATTGATGTCATCATATCGCC ATCC GCACAA  
AAA ACTC TTTA TTATGAGCTAGATAACCAAGTCTTT TTTA TCTACA ATCCCTCAAAA TTTC CATAACCAGA  
TTGTTCTTACCATAT ATCC TCTATA GAAAGTCTGTATCATCAGGCTC GAAT ACTGTAGATGCAACTAT

TATAGTTCCTTGCAGCGTAGCTACTGTTGCAGCAATCTCATGTGGCAAAGCCGATAATCTTTTAAAGAAGA  
GTTCGCTGATGTTGCTCTGAAAGAAA AAAGACCTCTGATTC TTGTACCACGAGAGGCTCCTCTATCCGCAA  
TACA TTTAGAAA ACTTACTCAAGCTAGCACAGAATGGAGCTGTAATACTCCCTCCTATGCCTACAAA GTA  
CTTTAAA CCTCAGACTGCAGAAGATATAGCCAATGATATTGTGGGAAA AATCTTAGCCATTTTACAGCTA  
GATAGTCCCCTTA TAAA AAGATGGGAGA ACCCCGCTAATGGGAGGTTCTCTTTTC GTTGATTACTTCAT  
GTAAA TTTCAATAGCAATGAAGGCGCTAGGGTCTTCTCTGTGCACAATCTCTTTAAGCTGGGAAA GCTG  
CAACCGTTCGACAACGATA TAAA GAAGA TTTC GAGGCTCCCCAGAAA AACACCTTCTGCATGCAAATAA  
GTCA ACCCT ACCCT TAAA GTCTCCATAA GAATG TTTC CTAAT TTTC TAGGAGAAGAGGTAATGATAGTTA  
CAGACTTAGTGTCTTC GAATCC TAAA ATCACCATATCCATAAC TTTA ATAGCCACAGCATACTAGTACAA  
AGACA TAAA AGCTGTATGCCAATTGCGG TAAA CAATGCCGCCAAG GAAAAGATGAAGAAG TTTA CAAAC  
AAGATGACTTGCCGACAGTATATCC TCTCTTCTTA TTTACGATGATCCCTAAGA TTTCCGTTCCGTCAG  
TTGCTCCTCCGTGAC GAATAATCAATCC GCCTCCGGTCCCAACACA ACTCCACCAAGGACAATAG TTTTC  
TATTTTC TGAACCGTCAAAA TAAA GGGT TGTATTC CCAGCC ACTC AGGCAAAA CTCTATAAGCCATAAC  
CAGCAA GAAAAGATAATAACCGCAGTTATCATCTGTACAACGAAGTACTTCCCTATGCGCTTATAAGCCA  
AAATGATGAATGGCAAGT TAAA CAACAC TAAA AACACTGGAAGGAAGTATGCCC GAAAGAAT GAGCTGC  
TATCATAGATA ACCC AACGATCC CACCATCGAT TAAA TCGTTGGGAGCGAGAAT CATATGAACACCGCAA  
GCGGC TAAA AATCC ACCTATGATAAA CCAACTAAGAGTCTTAGAAA AATATAGAGG GAAAC TAAA TCAA  
TGAAA CGTATGGTATGAGCCATTGTTT ACCC CTTGTTGAAGCTCGCGAGAGACGGGGCTCGAACCCGC  
AACTTCGCTTACAGGGCGGTGCTCTAACCAGTTGAAGTACTC CCGCGCAAT CAAA GACACGACAGGA  
CAAAA AACCTATG ACCC CTTGTGTGTAAGACAGGTGCTCTAACCCTGAGCTACGC ATCCAAAAGACTAGA  
CGAGG ACTCTATCAGAA TAAA TAC TTTAAA TACAAC TGTTC CAAA TTCACAACGCAATTTT TTTCAAAA  
ATCC AA TAAA GCCC TAAA AGCCCTCGACTCTTTAGCA GAAA GTTGAACAATCGACTGCTCTTT TTTCTCT  
GCTCAATAAGTTCTCTAATCGCGATAACAAGCTTCTTGCTCT TTTAAC TAAA TTC TATTAGCAAGAAGA  
CTTTTC TCTTGTGCAGCATGCATATCGGACACTTGTGAGCATAGCGTTCTAAA ATGTTT CAGTGAATAC  
ACTAATTGCTTTTAAATTC TTGGT TTTTC TTGCCGTAACAATTC TACTTGATCC TCAAGCATCT CAAA TTC  
GC TTTA TCCAAAGACACTC GCTTCATACGCAAAAATAG TTTATAAA GCCCTAAA CTCAAACAAACAGCGC  
CTAAGGCAGATAAA ACTC CAACACCTATCAAACCTGCAGA ACTTCC TAAAAGGGCAAAGATAACACCAT  
ACCT ATTC CCAATAGAAGTGCTCCAATCAATG TAAA TGCTACAGACGCAATC TTTTC TACGAAGAGACTA  
TCACAC TTTCTTTCCAAA ACCGCT GAAA CTACCTGATCTCCCGT ACTC GACGATCTTACTTCTTACAAC  
AAA TACGAACACAACAGCAACGCATATCGCTCCTCAA TTTTC TGTACGTAGTGAATTC ATTAATCACAGAT  
TACCAACAACCTTGCTACTTTCG GAAA CATTTA GACGTTCCCAAAGATTAAGAGAGAAA AAAAGCCCTTTC  
ATAAGAAGAGGCT CAAA CTCGGCAAAC TAC ACCC GAGAGCCGTAATT GAAA TCATAATCATCGCCATCAC  
TGCT ATCC GATTTC AGATCC AGGTCTATGAGATTAACCGATTTTC GCCAGAACCT TTTTC TCCGAGACAAC  
GTCGAGATGAGCCTTATAG TTTA ACAAAGCTTCTCAC ATTC CTTGATAGCTTTA ATTAGCCGTT TTT  
AGCATCC TAATGAGATCTCCTCGTTCGTAACAAATACGAGAGT AGTGCTCTAACATAGCT TTTCAGCTCTT  
CTATCTG TTTCTC TTTA GCAGGCAGGACT TTTA GTC TTTCTTGAT ACCCCTCCAGCTTC TTTA GAAGATC  
TCGCACATCTTCTCAAG ATTC AGACAATAAGCTTGCCACGCC TTTAAA TTTTC TCG TAAA TCAAGTCTC  
TC TAAA AGACTTGCACACTTAGTATCCAATTC TCTAGAGC TTTA GCCAATTGTTGCTCTAATTGTGAGA  
TTTC TTCTT CAAA CTGAAGGAG GAGT TGCTCGCGAGCTTCTATTC TTTA GATCTCAAGCAACAAC TACA  
TGTATTC GAAA CTC TACCC TAAA ATAACAGCTCCCAAAGCAACCAGAGCG ACTC CTGCATAGAAGAAG  
AGAGGCGCG TAAA GGTACAGAA TAAA GCCAATAACAACAGCACCACCAGCAGCTGC TAAAAGCCC TAAA  
CCAACGCAGCGACAGCACTAAT TTTA TAACACA ACCCAAACCGGTTTTT CAAA CTTCAGGTGCTGGCGA  
TAGATCATTAAATTC CGTT ATTC GCTTCT ACTC TATTAGAAGTCCCTAATGC TAAA CTC ACCATT TTTCT  
CC TTTTC CGT TAAA ACAGGAGAGAAA TTGTACA TAAA CATTTT TTTAAAGAAA TCAAAAAGCCA CAAA CA  
GGCAGATATCAGGCCA TTTA ATCAAAAACAGAAG GAAT GATTAGGA TAAAAC CAAA TCTTGCCATCGTT  
CCAGAGAGCATTGAGAAGCTGTT TTTA TTA TAAA TACATTGCACTAA GAATCT TAAA ATCGAACAGACAA  
CACAATGGCTCGAACAGACTGATCC ACACGCACTAATTC CAAATGCAAAAACCTTC TAAA ATGAACACAGC  
AAGCTTGA TAAA AACATA TAAA AGAAT TGATCATAGAGC TTTA CGAGAAGGGGCGCACTGCAATCTGTC  
TCGACCAATAGCAATGCAACAGAA TAAA TACCC CTAATCATTGG GAAA AATT GAGTGTAGAAT AGCCTC  
TTTC TCTTCTCTA CAAA TTGCTTAGCTAACGCGA TTTCTTC TTTA GAGATATCTGCAAGTCTCTGCTTA  
TCCAAAAGCCTTGCTCTCAT TTTTC CAATACAAATCTGTCCAGA GAAA CTTTT CAAA GCTCTCCACCAT  
AGCCA GAAATTC TAGTAAGAACAGCACCTAGCATCACAG ATCC AAAACAACCA GGGT AACCACTACGTT  
AATCATAGGAAGCGTAGTCCAACCTGCCCAA TAAA TAAGGCTGCTCCTGTAAC TAT GAATAAA ATACTA

AGAAATACCGAGCGCAAGCACAGCAATACGTTTCGCTACAACAAGAAACTCTCGCTTTTGAAGCGCTATCCA  
CCAAAGGAGCCTCTGGCATATAACTTCTAAGAGGTACACTATCTCCAACAAAATCFCATGGCATCCCACTT  
AAGGTAAAAGAGATCGGTTATCAAAAAGAGAAGCTTTTCCTCAAAGAAAAGCGTATCGTCAACTCTTTT  
ATAGATCTAAAAGTCTTGCCTTAAATCCACCCATGAAATTTAGCATAAAACCATCCACATATT  
CACACGCTCTTCAAAAGGCCTATTTCCCTATTTTCTGAGTCTCTAAAACCCATATAATGGCTGGAAAT  
TTCCGCGCACCTTCTTGGCTTCTTGTAAATAGCTGATCTGAATGCGGTATCACAGATAACAGGTAAAGAA  
CTAATCCAAAAGCTCCTATAACAAGAACCAATAATTGCAGCTCCTCCACTACTCCAAAATAAGGAAGA  
ATAGACTCCCCGAGACAAAAGAAAACTCCTCCAAAAGCTGCAAGCAAACCTTGTTAGAACAACTACAAT  
AACTGGTATGTTTGAACGGTGAATAAAAGGAGTGTAGCCACATTTTCACTGTACCTCAGTTCAAACT  
GAACAACAATCCAAAATAATTGGTAGGACGCCAAACGTTTATAATTACTCTACTTGAAAACCATTAAT  
AATTATCTCAGACTTTCTTCCAATACACAATTTCAACCCACAAAAGCTGCTCTATTTTTTTCTGAGCAA  
GCTCTAAATCTCAAAGCAAGCAATCCTTCAACTTTCTAAATCTTCTTCTGCTTCATATAG  
AAGTCTTGATAAGATAACACTAATCCAGGAGTACGGCCTCTGGAGCTAACCCAGATGACTCTGAAGGG  
AGTCTCGTCCGTTTTAAAGAAAACCCATACATAAAAATAGACTTCTCCTATAACAGGCAGAACCCAGTG  
TCATTGCTAATAAGCTAAGAATAGGAGCAAAAAGAGAGACACTTCTGAAAAGAAAGCAGAAGAGC  
ACCACCAAAAGTGTAGTACCCCTAATACCAGGGCACCTATTGCCAACAATTGCTCTTTTACGGCTTGTA  
GTAGTCTGAGCACCAGATAGTTTCACTATGATCGGCACGCAATGGCAACTGGAATTACAACAAAAAGAAA  
TATTAACATGGCGCCTCTATTTTGCAAAAAAGCCGACATGCTACAGGAAAGCTAATTAAGTAAAAT  
TTTTATATATTTCAATGGTAGTTAAAATACCTAATCTACCCAAACAAAAGATGCTAAAATGACAAAAAAT  
AATCGTATTTATATTATCATGAGACACTTATAGTCACATCTGCTTCAATTCAGCTCAAATTCATTAAGAAA  
ATCGGATTTAAGAAGATAGACTCGAAGAGTCAAGACTAGCCAAAATGCAATTTCTAATTCATCAAAC  
AATCCCGACTACAAGACCAATAGAAGAACGTTAACCCACTCTCAAAGCCACAGAACCAATCATAATCG  
CTCCAATACCAAAACGGCAACACAAGCGACGATCCCTGCAAAGCAAACAAAGCAAGGCTACACAAC  
TAAAATAGCAAAAATTCCTAAGGAAACGGCAATTTCTATATTTCTCTTTCGCAAAATATAATGCGTC  
TTATACAGACACAACCTTGCGGGGCTCTCCAGAGTTGGAGCGCAAGAGGAACAAAAAAGATAAGACATTG  
TCGACTCCGGACCAAAAAAAGGCCGCGATAATACGCGAGATGGTAAAATACACAAATATTCAAAACATA  
GAAAACCTTAACCCCTCCCTTTCATCGCGTGAGACTAGAGTGTAAAACAAGATGCGAAAGCAAGGTTTCA  
TATCTGCTATGCAAGAAAACAACCTCCACACGGTCCCAGGATATCAAAAACAAGTCTTCCAGGGATATGT  
TAGAGAACGTCCTATCCATACCAAAGCAACATATAGACGTCCTCAAAATGAAAAGACTGAATAGAGGAATCT  
AAGAAGCTTGGTTAGCGTCTATAGATGCTTTAAGAGCAGCTTTTTCCTTTTCAGCACTATCCAAACATCT  
TGTGTAGCTAGATAAAACTAAGCGCACATCGGACAAATAAGCTTGCTCATTTTCTCTAATCTGTCCAAA  
CAATCAATCTCAAATTCATTACCTTAGCTTCCAAAGCTTGGAGATCGTCCGTAAGACCTCGCAAAAACA  
TCTTATTAATGAAAGAGACGGAGGCCAAAGCGTCTTCTCTTCTGAAAGATTACGCAAAACGTTGCTCAGC  
CAAAACATTTCAAACTTCTAAGCTAGCATAAGAAGATCGATACATAAGACGAGATATCCCGCACCCACA  
CAAGCAGATCCAAATAATTAATGCAGGAATACCTATTACAGTAAATATGACATTGCTAGCGCACAAAACCA  
AAGCTAATACCCAGCGACAACAACAAAAGCGCCTACGATAGCTAAAAGCTATATCCAAAATCAAAAGAAC  
AGTATTCCTCAAATGAAGACGAAGTAGATCAAACTCTACGCAGGAAGCTGTTGGCAACGGTAAAGAA  
GAAGCGTCTCCGTAATAGTAGTACTCATTTTTCACCTTTTAAATTTTAAAGCGGAAAAACTGTATCAG  
AACGGCGCTTTAATCTGCAAAATCACTATAAATCCGCAACATGCAGAACAAAAGCGCGTAAGCAAAAGGAA  
CCCCTAATCTCAGATGCAATATCTGAGGAGTCTTTAATTATTTTTCAGACGGATGCCTGCACCTGCA  
GCCGCTCCGATAATGCCTTATTCAGATCTCAAATTAACAACCTCTGCTGTTAATTGACTGCAAGTGT  
CTGATCAAAATTGCAACCGCTGTTTAAACCTTTCTGTCTGATGACGAATTTCTTGTTAGCATCCCTCTCA  
ATGGAGCAAATTGTTGCGGCATGACGCTTACACAAATCTAATATTTTTCCTTCCAACCTCTGGCAATACT  
TACTTACAGCTCGACGAGCTTCAAGGTTGCTCGGTAACCTCAAAAAGAGCTTTTATATTCCTCTCAAG  
CTCTCTCAAAAATAGAGACAACTTCTAACTGACGCTCAATCTCTACACGACGACTTCGTGCTCTAGCA  
AGGCCTAATCCAAAAGAAGGGAACCAACCATAACTAAGATCATAACAGCAGCTAAAAGAAAGCTGGGTCC  
CGATTCCTACTGCTGCAATCACAACCCCGCAGTAGCAACAAAAGTCCATAATAATTAAGCTATCCC  
ACAAGTTCAAAATCCACTCTTGCAGAACACAACAATCGCATTGTATCAACGCGACTGGATATGGCAGCT  
GCTCCTCAAACGAAAAGAGTAGCAGGTGCACCTGAATTAACATTAGAACAGCTCAATTTATTTCCCCTAAA  
ACTTAATGCCAAAACAACTTGGCAAAAGATTATAACATAATAGCCATTTTTAAATAACTAAAATTAAGA  
AAGCTAGAATTGACAAAATTAACCTTTTAAACAATTTTCTTAAATCCCTTATTAGAGAGCTCCCTTCTT  
GCAAAAAAATCTCTCCCTTCTTACAATTAAGTCTCAAAAGATATACCCCTCTCAAAAAACTGAGGT  
TATGCGCTCACCCCTGAAACTTTATTTCTCTCTGAAAAGCAATATGATGCTTGGCTTAAGCATACTG

CTTGGCAAACCTTCTGGGATGGCCGCATCTATCTTTTCGTTTCCTTAGTGCAGAAGTCAATTTTCGGCTGTTT  
TTTTAAAGCTGCTGAGACTTCTTAGTCTGCCTCTTGTATTTCAAACTATAGGTTCGACAATCACTTCGAT  
TAACAATCTAAAATCCATGGTCTCTGTCGTGAGATCCCTCTCTACTATACCCATTGACAATCTTTATT  
TCGGCTGCCATAGCTCTAGTTCTAFTTATCTTTAFTAAGCCTTCTGTTCCGTTGTCCGGGTTTAATGCCG  
CTACA GAACCAATGCGACAGGCTACCTCTCCGCTTATCAAAAACGATACCCGGAATATCAAA GAACC  
TTTCCTGGAAGCAATGTGATCGCTGCCGCCTTCAAACTCTGCCTTGCTAGCAACFTTTCCTGCFTTTCCTTG  
CCAGAAAACGAGCGCTTATTCGTTGGAACGCFTTTC AATACTCTATTCCTCTTGTCTTCTAGCATCTCTA  
AGGGCATTCTAAAATGCTCCCCTAGCCACA CAACCTTCTCTCTTCTTCAAACTCAGAGAAA TGCGAAC  
AGGTAA CAAGAACFTTTCATCTCAAA GA GAATACCTGTCAAA TATTGTCACAGCTAACTGCCTTCAAGGA  
TTCCTAGTTCTTCCCCTTCTTCTCAAGATGAAGGGAATCTCTCCCAAA CGTACGFTTAAGCTCATGTCTC  
GCCCCCTAGCAACTGCGTTTTC TCCAATCTTCTGCAGTTACTCTGCCCAAA ACCATGGAAGTTGCCGA  
GGAACCTTACACATCCGACCAACAATCTCCCGTCAAA TTTTCCTCTGTGCTCTGTTATTAATATGAAC  
GCCTGCGCCGCAATTCATTCCTACCACAGTGTCTGTTCTAGGAGTCTCTAACGGAATCGTCTTTTC TCCTT  
TATCACTGATTAGCTGGGTCTTTA TTGCAACFTTA GCTGCCGTAGGAAATGCAGGCGTTTCTATGGATG  
CTACFTTCTAACTTCATCATTGCTAGCCTCTATGAATGTCCCTCTAGGTCTTCTTGGCCTTATTC TTCCT  
GCATATGCCTTGTAGATATGCTA GAACCAAAATTAACGCAAA GTCTGATTGCTGCATTGTTTC TGTA  
TTAA TAAA AATTTTC TGAACAGAGATCTCCCGCCTGCTCTTACACCAATGAATAGCGAGCCTTGAG  
ATACAGGTC TTTATCAGCTCAAAAACATCGCTTCTATTAGAGGTAGAGATGAAA TAATTGTTGAGCTACC  
ATCGAAGAGCTATTCGTCTTAATCACGAGATCTTTTCGCAAAAA GGATTTGTTGACTGCACAGGTCCTACT  
CCTTCTATGACTACTCTAAAAGAGAATGATTTATGAATAAAAAAATACAGTATTCCTCATCAAGACTAGG  
ATTCATCAAAATCGATGATGGGAGTTGCTATCGGAGCCGGGAATA CAAGCGATTTCTAGAAATGGTAGCT  
CAAAATGGCGCGGAACC TTTATTCTTCAAA GTTACTGTTC TAAATTA CAAGTCTGATTCCTTTA ATTA  
TCGTTGA ACTCTCTATAGGGAACCTCACTAGAAAAGCTCCCATCGGCGCTCTGATTCGAACCGCGGGCC  
TAAA TCTGCTTGGCTAGGAGGATTTA TTGTTCTTGTAGCAACATGCATACTTGGATACTACTCCAATATT  
GTGGGATGGGGATTTAGCTACTTCTTTTATTCCCTATCCGGGAAA ATTGTCCCAGGGAACCACFTTC CTC  
AACCAAGGCACATCACTGTCAAAGCTGGATGCCTCTAAGTTGCCACTGTTTAGTCTATTTTC TCGCTTA  
TTGTATCATTCCGAAA GGAATCGTTAACGGAATAGAAA CTGTGAATAAGATCAAAATCCCGTTCTTTTC  
ACAAA CGCTCTTGTCTATTAGCTAGGGCGGTATCCCTGCCTCATGCTTGGGAGGCAATTCGCCTACTCC  
AAA TATTTAACAAGCTTCTCTGTGCGATTACAAAGTATGGATAGAAGCTTTTAACCCAAAATGCTTGGGA  
TACAGGAGCTGGTTGGGGCTTCTTCTTGTATACGCGGGATTCGCTTCAAACAACCAGCTTAGTCACC  
AACGGAGCCATTACAGCTATCACAATAATTTTATTTCTTTTCCTCATGGCTGTAATAGTGTCTCCGCTT  
GCGCATCGTTAGATTC AACGGAATGTTAGGATTACGAGAAGGCGTCGGCGCATCCAAATATAGGAATGGC  
TTTTATTTATCTCCAGAACTATTTA CTGCGCTCCCTCATGCCACATTCCTCTACATTTTTA GCGCA  
ATCTTCTTCTAGCCTTCTCTATGGCGGCCCTATCTTCGATGATCTCGATGCTGTTCCTTCTGTGCAAA  
CATTAAC TGAACAAA GCATCAAAAAACATATTGCA GAATCTTCTGCAACCATTGCTGCGTTTC TTATCGG  
AGTTCCTTCTGCGTTGAATTTA CAATTTCAAAATAACCAAGACATAGTCTGGGGAATCGCTCTTATTC TC  
AATGGCATGATT TTTATTTATTC CGCATTGAGCTACGGAATTAAGCGCTTAAGACAAGATGTTATCAATT  
CTGTCCGGGTGATTA TAAAT TAAA AACTTACTTCGACATGTTGG TAAAATT TTTACTCCCTTTA GAAGG  
AGTCTTACTGTTAGCGTGGTATTTCTATGAAGGAGCAATGCTTCTCAAGCATATTGGTGGAAATCCTCAA  
ATTCCTATAACA FTTC AAGTTA CT CATGCAGTGGGATTAGGCGGAGGGGTCTCTTTTC TTCTTAACC  
GCAAGCTATACACAAAATTTA CTGAAACA ACTAGATTTTA ACTGAGTTGCTTGTAAAGTCTCAAA CATGA  
TATACTCCTTGGCCGATCGGGGTCTTCTAATTCAT TAAAGGCTCTTTAATTGTGATTCACGGAGGAAA TA  
TGGTTCATTC TGTATACAATTCATTGGCTCCAGAAGGT TTTAGCCAAGTCTCTATTC AACCAGTCAGAT  
TCCAACCAGCAAAAAAGTAATGATTGCGATAATGACTCTTCAAA CACTCACAGCCATTGCAGCAATAGTC  
CTTTC CATCGTTACAGCAAA TGGA GGGTTTCCTTTTCCTTGTGCTGACTTAACACCGTAACTATTGGTG  
CATGCGTATCC TTGCCGATATTTA CTGTCATAGCTACAACGTTATTACTTC CAATCTCCGTAATATCGA  
ACTCTAGCCAGACCGCAAGTATTGACCTCTCCACTCAATTCAGCCCAACAAAACCTCAA GAATAGGTC  
GTCGCTCAGCA GAAA ATGAGCTGAACGAAGCGGGAAGACTCACTGATTAAGCACA TAAAGATAAGGCAAC  
GTTATGACGTA CTCTATGTCCGATATAGCACACAAA CAATAATTTCTAATCC CAGTCTCCCGCTCCAT  
CAAGAAAACGAGGATCC TTTCCCCACAATCTCCTTCTGCCGTGGGCTCTTTA GAGGGAGCTAA FTTC TC  
TACATGGGGGCCAGGCCCTTCTTCACTGTCCCTG TTTATCCACAACA ACTCGCTGCAATGCAAAAACAC  
CTT TTTA CATTGCAAACAGAGG FTTC TGCTCTCAA GAAA AATTAGTTAGTCTAGTCAGACACGC GGAT  
CTTTAGGACTCGGCCCGCAGTT TTTA GCGGCATGCTTAGTTGCTGCGACAATCC TTGCAGTAGCTGTTAT

CGTACTTGCTTCCTTAGGGCTTGGCGGTGTTCTTCCTCAAATCCTCGCAAATCTGGCTGGTCAACTAAT  
GCAA<sup>CAA</sup>AGGCTATTGTGAGCGCTCCATCACTACTGACAAA<sup>TTGCGTTTC</sup>CATTGCCTGCATCTTCT  
TAGCAAAATGTGATAAG<sup>GGATCTGATCC</sup>TCAAAC<sup>TTTA</sup>TATGTAAGCTAATT<sup>CAAA</sup>AATTAGAT<sup>TTTAATT</sup>  
<sup>CTAAA</sup><sup>TTTC</sup>TT<sup>GAAA</sup>TTAACAAT<sup>TAAA</sup>TCTATTAGCATGCTTCT<sup>TTCTG</sup><sup>TAAA</sup>GGAAGC<sup>GGAT</sup>CGTTG  
CGAGCCTTGCCTTT<sup>CAA</sup>ACTTAG<sup>CAA</sup>CGTCGCGGAGAG<sup>GAAA</sup>AGCGAGCTCTATTA<sup>TTTC</sup>TTCTATTGG  
GGCTCATCTGGAGCGTCGCTGCTACGGTTCCCTTGCTCTGGGGGAGAGCCTGTTCTTAGAAG<sup>GAAA</sup>TTGG  
AGCTGAGAAGCTGCC<sup>CAA</sup>ACCTA<sup>CAA</sup>AGGAGC<sup>ATCC</sup>TTTT<sup>TTTCCAAA</sup>CTTCA<sup>TTTC</sup>GTG<sup>TTTAATTC</sup>TC  
TATAACCTCTCTCGGAAGC<sup>GAGT</sup>CTCTCAAAGGCTCTC<sup>TTTCTTTTC</sup>GTTCATATCTTGCCTTCTAATCT  
GCAACC<sup>TTTA</sup>CCTTT<sup>CAA</sup>AGCATCTAGCCATACACAA<sup>GGGTGTTTC</sup>TGGC<sup>ACTC</sup>CGACT<sup>TTTC</sup>TCTATAG  
<sup>GATCC</sup>TTATATGGGGCTGACA<sup>ATTC</sup><sup>CAA</sup>ATTATGCCAATT<sup>CAAA</sup><sup>GGGTTTA</sup>TAGATCAATTT<sup>TTTA</sup>AT  
<sup>ATCC</sup>AAGATGCCAAACGTCAATT<sup>CAA</sup>CAATT<sup>TTTA</sup>ATGCCATTACAT<sup>CAA</sup>ATGGAGATTT<sup>TTTA</sup>GGGCAC  
GTATCGTCAACCAG<sup>ATTC</sup>AGTATCTCGGAGCCGAGCTA<sup>ATTC</sup>TTCTCGCT<sup>TTTA</sup>TTGTCGTAATTAC<sup>TTT</sup>  
<sup>CATATTC</sup>CCTCTGGTACTACTACA<sup>TTTC</sup>ATCGTCAC<sup>TAAA</sup>AGAGC<sup>TTTC</sup>CAGAAGATCAGCATCTCTTCCTT  
GATACTGGCTAT<sup>CC</sup>CCCTTCTACCAAACAAAC<sup>TTTAA</sup>AGCTGTG<sup>CAAA</sup>AAGGATA<sup>AAA</sup>TACACCT<sup>TTTACT</sup>  
TGGTTAGTT<sup>TTTAT</sup><sup>TTTC</sup>TTATGCAGCTTCTTGTGCGT<sup>ATTC</sup>CACAGAGTTCAATTA<sup>TTTAAA</sup>AATC<sup>CAAAA</sup>  
TGCACAG<sup>CAAA</sup>GAAA<sup>CGCTGAGACTTGT</sup><sup>GAGT</sup>TAACAGAGA<sup>ATTC</sup>ACTAAGT<sup>ACTC</sup>CCTCCT<sup>GGAT</sup><sup>TTTC</sup>  
TTAG<sup>GAAA</sup>TATGTT<sup>CAA</sup>ACCTTA<sup>CAA</sup>CTTATAGCC<sup>GAGT</sup>AATCACAAGAC<sup>CAAA</sup><sup>GAAT</sup>CAATAACATCA  
<sup>TTT</sup>CTTTCGCTCCCATCTGCTTC<sup>TTTAG</sup>GCCTAT<sup>TC</sup>TGTTGTTGGTCAAT<sup>TAAA</sup>ACTTCTGTCTTCATAGC  
AACAAATGG<sup>GAAT</sup>GATCGCTAGAGAAGGGCTTGTCTTATGC<sup>CAAA</sup><sup>GAT</sup>GATAATAATCTACAGTTATTAATC  
TATGGC<sup>ATCC</sup>CTAA<sup>TAAA</sup>ATCC<sup>GAAA</sup>TCAGGTGCG<sup>GGAT</sup>CGCGATAGAATCT<sup>CAAA</sup>TTGAGCCTGCGGGGA  
<sup>TGTT</sup>CATCTGCGCACTACTATG<sup>TTTA</sup><sup>TTT</sup>CATCC<sup>CGCACCAATACGTACTCT</sup>GTATTATCAT<sup>TTTT</sup>CGCCGT  
GTGT<sup>ATTC</sup><sup>TTTTA</sup>GCAATATTGCTACGCACTCACT<sup>ATTC</sup>CAAAAGCCATTC<sup>TTA</sup><sup>GAAA</sup>TCTCTCTTAGAA  
<sup>TCA</sup>ATACATCGTAGAGTTCTATACGCGAATGG<sup>CAAA</sup><sup>CGGAT</sup>ATGAATGACACT<sup>GAAA</sup>AACGCCAAGCTG  
<sup>AAATCC</sup>TTCTGCTAACGCAT<sup>TTTAAA</sup>AAACCC<sup>TCAAGA</sup>ACGCAACCAATG<sup>CAAA</sup>CGTTCCAACACTTGT  
GAACC<sup>TAAA</sup>AAATCGCGCAGT<sup>ACTC</sup>CCCAACCTACTTCTTCACATGAACAAGTTGGCTTATCAGG<sup>GAAA</sup>  
<sup>TTAAA</sup>AAACCT<sup>GAAT</sup>ATGT<sup>TAAA</sup>AAATAGCGTATGGGC<sup>GAAA</sup>GAT<sup>TTTC</sup>CTC<sup>ACTC</sup>TGAACTAT<sup>TAAA</sup>AC  
GTTGGAGCAGCCTTCCCAAC<sup>ATCC</sup>GACCATAGCAGCAGCTCTTCACCTCTAT<sup>CAA</sup>TAGAGCATGACTT  
GCTTCATG<sup>TTTC</sup>CGATATTGCCGATGATC<sup>TTTA</sup>TGATCAGTCTGGAGACCGTCTA<sup>TTTAC</sup>AGCTGTTCTC  
ATCGTAA<sup>GAAA</sup>ACATAAGCCTGGTGGAGA<sup>ATACCA</sup>AGCTCTTGCC<sup>GAAA</sup>AACATCTCTCAG<sup>GAAA</sup><sup>TTT</sup>CTAG  
<sup>AAT</sup>CTGAGGATCC<sup>GAGT</sup>TAATAAT<sup>TAA</sup>AGGTC<sup>TTTC</sup>TATCTTAGC<sup>CAAA</sup>GAAA<sup>GAAGCC</sup>TTCAAACCT  
CCCTATT<sup>ATCC</sup>TCCCCTTCTTGACGC<sup>ATCC</sup>TAATGAACAAGTAT<sup>TTTC</sup>TACAAGCCTGCTTATCTCTAGAA  
<sup>ACT</sup>TGTGCAGAT<sup>TAAA</sup>CAATATGCTCAATACGGGCGACGGTCTCAATACACT<sup>GAAA</sup>AAGACAAAAGACA  
CACAAGCTGCACAAGC<sup>TTTA</sup>CTGAAC<sup>ACTC</sup>TAGTGCCTCTTT<sup>GGAT</sup>GC<sup>ATCC</sup>CTAGTCTAT<sup>GAGT</sup>TCGT  
TCTTGCCCTCAGTTCA<sup>ACT</sup>CAAAAATGTCTTACGCAAACTAGCAG<sup>GAAA</sup><sup>CGATT</sup>CTAGCCTCTCTCC<sup>TAAA</sup>  
<sup>GAAT</sup>GT<sup>ATTC</sup>CAAT<sup>TTTA</sup>ATT<sup>GAAA</sup>TGGTCGC<sup>GGAT</sup><sup>CATTC</sup>TCTACACAATAGCTGCCGATTATGGCAG  
CAAAGGC<sup>CAAA</sup>AGCCACATAGATAGTCGTCAAC<sup>TAAA</sup>ACG<sup>TTTA</sup>GC<sup>CAAAAA</sup>AAT<sup>TTTAAA</sup>GTCTAAGGC  
TGC<sup>TAAA</sup>GC<sup>TTTA</sup><sup>TTT</sup>TACGACTACCA<sup>TAAA</sup>AC<sup>TTTA</sup><sup>TCC</sup>AAAAACGCT<sup>ACCC</sup>TCGCTACGATCTCCAT  
CTGCTTATT<sup>GAAA</sup>GCC<sup>TGGA</sup>AGCAAAT<sup>TACCA</sup>AGCTGAAGTCAAT<sup>TTTAT</sup>GTTAGCCTT<sup>TTTA</sup>GCCATCG  
TCGGCTCATCAGATTATGCAGATGT<sup>TTTA</sup>ATTAGATCTCTTACAGG<sup>GAAA</sup>AACC<sup>TAAA</sup>AGCTAGAGCTCA  
AGC<sup>TTTAGAAT</sup>CTCTA<sup>GAAA</sup>AAGATTGCGAGAACCCTTGT<sup>TTTA</sup><sup>CTC</sup>TTGTACACCT<sup>CAA</sup>TATATCGC  
GATAAGCATACTTCCGACGAG<sup>GAAA</sup>TATTATAT<sup>GAAA</sup>AAAGGTGTGGAACCATTGGCTATTGAAGAACTTC  
T<sup>GAAT</sup>CGTCTCGAACAA<sup>ACCC</sup>CT<sup>TTTC</sup><sup>TTTC</sup>AGTAAGCTTATAGCTCAGCAAC<sup>TAAA</sup>AGAAGAGC<sup>TTTC</sup>  
TC<sup>CAA</sup>CGATGCAG<sup>GAGT</sup>TCTCTCTGCTCTACAAAGC<sup>CAA</sup>ACTAA<sup>GAAA</sup>CAAAAAACCTCTATATTGTCC  
CGG<sup>GAAT</sup>ACATAACTAGTTCCTAGC<sup>TTTAAATCC</sup>TTAGTAGGAGGGACTTCCTTGAACCTTATAGACAAA  
GCC<sup>TTTC</sup>TCCT<sup>GAAA</sup>AAAC<sup>TTTC</sup>TTA<sup>CAAA</sup>ATCC<sup>TTAG</sup>ACAT<sup>GGAT</sup>GT<sup>CAAA</sup><sup>TTTC</sup>TATAGCAGATA  
<sup>AA</sup>CTGAGGTCA<sup>TGCTC</sup><sup>TTTAAA</sup>GCTGGCTCT<sup>GAAA</sup>TCT<sup>TTTC</sup>GGAAGGGCAACCAAG<sup>TTTC</sup>AGCCTATA  
TGTAATAGCAGAA<sup>GGAT</sup>GTGTGAGA<sup>ATTC</sup><sup>CAA</sup>CAAAAGA<sup>ACCC</sup>ACTATTAATGTACGACT<sup>TAAA</sup>CCCTA  
GACTGC<sup>CAA</sup>AGGGAA<sup>GAAA</sup>GCTT<sup>TTTC</sup>CAATA<sup>TAAA</sup>GTTCGG<sup>GAATATTC</sup>AGCAGAAGCGATT<sup>ACCC</sup>TAG  
T<sup>GAAA</sup>ACGTTGATATT<sup>GAATAAA</sup>GGACAG<sup>TTTC</sup>TAAGCATTATCGAG<sup>GAAT</sup>GTCC<sup>TCCGTTTC</sup>ATTGGT  
TCTCTTA<sup>GAGT</sup>CCT<sup>ACTC</sup>AAAACAGATAGTC<sup>TTTC</sup>GAGATCAAT<sup>TAAA</sup>AAAACCC<sup>CAGT</sup>TACC<sup>CAA</sup>GAT  
GGGAAC<sup>TGTGGGC</sup><sup>TAAA</sup>CTC<sup>CAAA</sup>TTGCAGAGAT<sup>TTTAGT</sup><sup>CAAA</sup>ATGCTCTT<sup>GGAT</sup>GTATT<sup>TTA</sup>ATCACG  
TCACCGACTGTGCG<sup>GAGT</sup>TGCTCGGCATCATCTTCA<sup>GAAATTT</sup><sup>CAA</sup>AGCAAAT<sup>TTTC</sup>TCTTCT<sup>TAAA</sup>GTCA  
TAATCA<sup>ACTC</sup>TGTCAA<sup>ATCC</sup>AAGCTGTCTGCA<sup>TTTA</sup>GATCTTCTAT<sup>GAAAGA</sup><sup>GAGT</sup>CTAC<sup>CAAA</sup>AC<sup>ATC</sup>

CTCAGGACTTACTCGAGCTGATCAACTATAATTGCCTTTACATCATCTTC TAAA CTCATCC TATGATCC  
TTAC TTTCATTTCAAATGAAGCGCCTTCCATCTTAAGCAGACGGTCGACTTATGGCCATTTAAAATGGG  
CCATTGGGTTTC TCGCAGAGTCTATAGCAAAAAAATCTAGCTTTAAATAAAA ACTAGAGTAACCAATCCC  
TACAAGTCTACTCTTTCGCACATTC TATGCGTAA GGGT TTTA GCATACTGAGCATCC TGCACAGCTACTA  
TATCTCGACTGTATATACAGCCAAC GAAATGCCTTC TAAATCAAAA ACTCAGAAGGGCTTAGGGCGAGAA  
GCA TAAA CCGCTCGCGAAGATAGAGAGGAAGTTACCAT GAAAAAAC TTAATT TTTC AAGATAACC TTTC  
CCA ACTACTTAAGCCATACCTCCGTCAAC ACTC AAAACTTGCCCTGTGATGTACGAAG ATCC GTCAGAAG  
CTAAGAACAAAGCGGCCTTAGCAA TTTC TTCAGGCATACCAACTC TTCCCAAAGGA ACTCC TTTC AACCA  
CTCATT TTTC AAATTATC ATTC AAGCTCTTGGTCATATCAGTATCTAT GAAA CCAGGAGCAATACAATTG  
ACTC GTATATTC TTACTTCCA ACTTC CAAAGAT AACGC TTTA CTGAATCCAATAATTC CAGCCTTAGCTG  
CTGCATAATTC GTCTGACCTGGGCTTCTCTAAGTCTTACAATAGA ACTAATATTAATAATTGCCCCAGA  
TCTAGC TTTAATCATAGGTCTTATAACTGCTGAGCAAACGTTGTATATAGA ACTAAGTTGGTGTTAATC  
ACCGAAGACCATTC TTCTTCAGACATTC GCATAAGAAGAGCATCACGCGTAA TCC CCGCATTGTTA ACTA  
TAAATCGATAGTGTAT ACTCC GAAAGAAA GTTCTGA ACTTGTGCG GAAA CCAATATC ATTC TTGCTGAC  
ATCAACAAGAGCAAAA GGATACTTGTCTTCCAG CAAA CTCAGAGAG GAGTCTGAGCAGCCGCTGCCCGCT  
TCCCCATTAATTC CCCAGA CAAA GACATTAGCCCC TTGCTCAGC GAATAACTTCGCTATACTGA ACCCTA  
TGCCCTTAGAACCCGAGTCACAATTGCAGTCTTG TTTACCAAT TAAA CCACTCATTCCACA ACTCCGACAA  
AAAT TTTC TATATCTTCCATAG ACCC TAAATG TTTA CAAGGGGA ACTCAGTCTTATAGATCGGCTCAGCC  
CTGTGAGAACATTC CCTGG ACCCAGCTCAAG GAA TAAA TCTAC TTTAGGAT CAA CAAAAA ACAG CAAA  
GTACCATAACGTTGAGAAAGTCA CAAA TCTGACCAT TAAA GAAC GGATAGCCTCGCTCTCATACACTAAC  
TCCCCTATTACATTAGAAGCAAAAAGCTACATTA GAAT CTTTA ATTGCTAACTGGTACAGATAAGGAGCTA  
ATTC GTCCCTGAGCAG CAAA CATAAGCGGTGTAT GAAA AGCTCCAGCAACTTTTA ACATAACTACTTT TTT  
AGCCCC TAGTTCTCGAAGAAT TACAGAAGCCTCTTCCACCTTA TTTC TAATCC CAGCAATTACGATCTGC  
TTGGGAGCATTGTAA CAAACC ACCC AAATCC CTTCTCC TAAA GACTC CAAAGCAGGTAATACAAC ATCCG  
CAGTTAATCC TAAA ACTGCAGCCATTGCTCCCGAAG ACTCTTCACAAGCAGCATTC ATCAGCTCCGCTCT  
CTCAA TACGATGCGAAGCCGCTTCTAAGCTAATACGT CAAA ATGCTGT TAAA GCAGTAT ATTCGCC  
AAA CTAAGGCCT GAAA C TAAA ATAGGCTC GAAA GGACAGTGTGTAGA TAAA ACTTC TAAA ACAGC TAAAC  
TATGTAGATAAA TGGCTAACTGACTATTC GATGTC TTTA ATAGA ACTTCTTCAGTCCCTTCGAACATAAT  
AGAAGA TAAAGAAA ACCC TAGAAA CTCATCAGCCTGAGAAA ACAACCTTGC GACTTCCGAGGAT TGTGTA  
TAGAGATCTCTCCCATGCTACGA ACTGGCTCCCTTGCCAGGGAACAATAAGCCACACG ATCC ATCA  
CACAGTCTCCTCTGTTACACTTGCTG TAAA ATCACTGCTCCCCAAGATAAGCCTCCCCAAAAGCTACTA  
ACAACAACCGCTCCGCAACAT GGAT ATCATGTGTACGTAAGAGT TCGTC TAAA GCA ATCCC ACAGAA  
GGCTGCTGTGTTACCATACTTAGCAA GAGT TTTAAA TACCC GAGAGT CTTA ACAGCAAACGT CAAA CA  
ATAGCATCGATAATACGCTCA CAAA CCTGATGAGGA ACTAACCAATCTATATCTT TTTC TTGCAGCCAG  
CTTCTGTAATGCAAGTCTTGGCAGCAA ACTC ATTC GTCGACTGCGTGT TAAA CACTTC TTTA CCTTC  
CATAGTAAT GAAA TGTGATG ATTC TGTACGGT ATCC TGAGAAGCCGGACAACGACTACCTCCTGCTGGC  
AACCG TAAA AGATCTCCTTGT TTTC ATCCGCTCC TAAATTCAC TTTA GAGA TTCTAAAGCTCCTGGTC  
TAGAAT GACCAACAATACATGCAG ACCC TCC ATCC CC GAATAACACACAAGTATTACG ATCC TGATAGTT  
AACAAAGGAAGACAA CAAATCGGCCGAATCACAAGCACACACTGATAC ATCC CAG ATTC GACATATGCC  
TTGGCTATGGACA ATCC G TAAAGAAA CCTGTACACGCGGCAAGCAATCAAAGGCTG GAA TTTC CTAA  
TTCCCAAATAGGCTTGAGCTAAGGCAGCACTGGAAGG GAAA ATATAATCAGGCGCGGCAGTAGAAA ATAC  
AATACAGTCCACTTGACT TTTA GAGAT TTTA GCCGCTTCTATAGCCT TTTC TGCCGCTTAGCCCCATA  
AAAGAC GAAA ACTC CTCAGCAGAAGCT ATTC TACGCTCCTTG ATTC CAGTTC TAGTC GAAA TCCATTC GT  
CAGAAG TTTC AACTATTT TTTC CAAATCAGCG CAAA TCAAAT TTTC TTAGGCAAATACGAACCAGTTCC  
CCAGATCGAAGCTCTCACATCTTT TTTC ACACGC ACCCGCAAACAAAA GAAA AAACCAAGTATACTGCT  
AGGGAGG TTTA TACC TAACC TTTA TCAAACATCTAT CCTCATAATCGATTATCTAGGTGCTAGACC TAA  
ATAGGCT TAAA AGACATGT TAAA ATATCCTGATTACA TTTCGAAA CTC ATTTTC ATT TTTAAA AAAGCTTC  
CAG GAAT TGGC TTTAAA TCAGCAGAAA AAATAGCT CAAAAT TATTA GAATGGGATCC ATCTCAAATTGA  
GGCTATGGCTCTAGCATTACAAGAGT TCTCTACTTCGCATGCAACTTGCTCAAAC TGT CAAATTTAAA  
ATCTCTCAA ACTTCCCCTTGTA ACT CAAA CAGT GAAT CTCGAG ATTC TTCTTCTTATGTATCGTTGCAA  
CTCCTAAGGATGT TTTC GCTCTGGAGAAA TCTAAGATCTTCAAAGGGCACTA TTTC GT TTTAG GAAA CT  
AC TTTC TCCCATCACTG GAAA GCA CAAA TC CAAAGAAA AATTAGCT ATTC TTAAGCAGC GAAT TGAAGCT  
TGTTC CCC TAAAGAAA TGATCATAGCTCTTGACGCAAC CAAA GAAGGAGATGCAACTGCATTGTT CAAA

AA CAA GAAT TTTC TTACCTTCCAA TAAA AATCTCTAGATTAGCTCTTG GAAT GCCTGTCGGTCTCTCC CA  
AAAT CAAA TTGATGCTAATAC TTTA GCTCGAGCTT TTTCAGGAA GAAA TTGCT TTTAAGC ACCC TCTCAA  
AAGC GAAA CTGTT TTTC AAAAAAGACC CAAA GAGT ATA CAAA AGGCGG TTTA TCTAGTT CAAA CTAGTG  
ACCAGC ACCC CTCT GAGT TCTCCCCGAACCTGCTAGAG GGGT TGCT TTTC GGGCTTTT TTTC GTTGT TT  
TC AAGTCTCTCTGTTCTCT TTTC TTCCTATA CAAA TAGGGCTAGTCAAATT ATCC TCGATTCTCTATT  
GTAATT GGATAGGTC TT GAGT AGTCTCTTCC TAATATGTGGGGACGCCTATGAGATTGGCTTCTGACCAA  
ATAA GAAT GGTGCTCTTCCCA GAAA GAGT AAGAA TAAA ACTTC ATCC CTAGCGCAGACT TTTC TAGA TAA  
AGGAAGTAATAATGCTTG GAATACGCAAAAAACG ATTC TGCAACTC GCTGT TTTA CTGTTGCTCACCT T  
TTC ACAAAGTTC TTTC TGTTCAACTTCAGAAGGACGTATGGTCGTA GAGTCTATCACCATTACG ACTCAA  
GGAGAG GAATACTC AAAA TAAA CGAGCT ATTC TAAA A TAAA ACAAAGCAAGGGACGTTGTTCTCTCAAG  
CAGAT CAAA ATGAAGATCTAAGAACAC TTTCGAAA AAT CAAA ATC GAGTAGAGCCTATCGTAGAG TTTCG  
TAATGGACAAGCTGTGATCTCTCTG ATTC TGACGGCAAACCTGTTATCAGAGAGATCAATA TTTCAGGA  
AA TGAGCT ATCC CACTCATAAAA ATTC T GAAA AC TT TAGAGC TT TATAAAA ATGATCTT CAAA ATCGGG  
AAT TATTC TTTAAA AAT CAAA ATGCGCTAAGAACTC TTTACAAAAA CGAGGGT ACTACGATTC TCAACT  
CTCCTATTC TATAATCATAATGA GAAA GAGGGC TT TA TCGATA TTTC CATCGAGAT TAAA GAAGGACGT  
CACGGTCGCATAAAA AAAATTAACGA TTTC GGGAAAT TACGCGAACAGAAGCATCAGACTTAGGTGACATTG  
T TTTAAC TAAA CAAT ACTC CACAACAACGAGCTGGT TCACTGGTGCCG GAGTGTATC ATCCGGACATGGT  
AGAGCAAGACTTA CAAA CTATCACAAATTACTTCCAAA TAAA GGAT ATGCTGATGC TAAA GTAAGCAA  
GAGGTC TCTACAGATGC TAAA GAAA CATTAC CAAA CTTATCGTTGTAGACAAAAGGACC TTTA TACACAT  
TAGGTCACGTACATATAGAAGGATTC ACAGCGTT ATCC AAAAGACTGCTCGA TAAA CAACTATTGGTTGG  
ACCTA ACTC CTTATATTGCCAGA TAAA CAAA GACTGGAGCACAAAAG ATTC GTAGCGCATAACGCTAGA  
TATGGCTACGTGAACACTAACGTTGATGTCTCCTTCTCAGCGC ACCC ACTC TACCTG TTTA CGATGTTA  
CCTATC GAGTGAGT GAAGGAT CTCCCTACAAAATC GGGT TAAT TAAA ATCAAAGGGAAC ACTC ATACTAA  
GCATGATGTGAT CAAA CATGAGACTAGTCT TTTC CTTGGAGACACT CAAA ATAGAT TAAA ACTAGAAGAT  
ACAGAG ACTC G TTTA CGAACACCGGCTAC TTTAAA AGTGAAGTGTCTATACGTTTCGTTCCCAATTAG  
ATCC TCTCGATTC TAACGACC TTTA TCGAGATGT TTTC ATTGAAGTCAAAGAGACT GAAA CAG GAAA TCT  
TGGGCT ATTC TTAGGATTCAGCTCCATTGACCAT TTTACAAA GAGGAGCAGAAA TTGCA GAAA GCAAC CAA  
A ATTTACAAA GAGCCC GAAA TTTC TCAAAAAAGGATTC CAAATC TT TAAGAGGTGGTGGAGAAT ACCTCT  
TCC TAAA AGCTAA TTTA GGAGATAAGGTCACCGATTACACTGT TAAA TGGAC GAAA CCACACTTCT TAAA  
TACCCCTT GGATTC TTGGAGTGAAT TAGATAAA TCAATTAAT TAAA GC TTTA TCAAAGACTACTCTGTG  
GATACCTATGGAGG GAATATCAGTACCACCTAC ATTC TTAACGATAAGT TAAA ATATG GGATGTATTACC  
GTGGTAGCCAAACAAGCTTAAG CAAA CGCAAAAAACGTCCAGCTCTAATAGACTTGGACCAGAT TTTAGA  
CAGTAA TAAA GGATTC G TTTC CGCAGCGGACTC AATGTTCTCTATG ATTC TATTGATAATCC TAGAAA  
CCTACTATGGGAATCC GCAGCTCCT TAAA CAAA AAT TATCTGG TTTA GGCGGAAC TACCAAT TTTACTA  
AA CTAAAGCTAGTGGTCTATCTATCGCTTATTAAC TAAAAAAGGTGT CAAAAA GTCCGTGCAGAAGC  
TAAG TTTA TCAAACC TTTC GGAACAACAAC TGCACAAGGC ATTC CTGTCAGCGAACGGTCTTCTTAGGA  
GGT GAAA CCACTGTTCCGGTTACAAACCT TTTA TTATTGGACCGAAGT TTTC TCCTACTGAACCACAAG  
GAGGCTGTCTTCCCTACTATTAACAGAAGAA TTTC AAT ATCC CAAA ATTC TCAACCTGCATTAATGC  
C CAAA TATTTCTAGATTC CGGATTC ATTGGGATAGAAGAGCACACT ATTC GCCT GAAA GACC CAAA CAGT  
AGCGCT GGACAAA GTCTACGC CAAA ATATGAT GAAT AATGTGCCAATTATGCTAGGCTG GGGT TGGCCGT  
TCCGCCAACA GAAA FCC TCAATAAT GAAAAAATGATGTATCTCAAAG ATTC TTC CAAACCTTGGGAGG  
AGTATTC TAGAATCC GAAA GGAGAAGGAGAGC ATCC TTCTCC TTTC ACCTATTGGTATTTT TTA TAG GAA  
AGAAT TAT GAAA AAGTCTTATTACTTAGCTTAATGTC CAAA TCATCTCTACCTACA CAAA CAGCTAAT T  
CTACAGGCACAATTG GAATCGTTAA TTTACGTGCTGCCTAGAA GAGTCTGCTCTTGG GAAAAA GAATC  
TGCT GAATTC GAAA AGAT GAAA AACCAATTC TCTAACAGCATGGGGAAGATGGAGGAAGAACTGTCTTCT  
ATCTATTC CAAGCTCCAAGACGACGATTACATGGAAGGTCT ATCC GAGACCGCAGCTGCCGAAT TAA GAA  
AAAAATTC GAAGATCTATCTGCA GAAT ACAACACAGCTCAAGGGCAGTATTACCAATAT TAAA CCAAG  
TAATCTCAAGCGCATGCAAAAGATTATGGAAGAAGT GAAAAAAGCTTCT GAAA CTGTGCGTATTC AAGAA  
GGCTTGTCAGTCTTCTTAACGAAGATATTGTCTTATCTATCGATAGTTCCGGCAGA TAAA ACCGATGCTG  
TTAT TAAA GTTCTTGATG ATTC TTTC AAAATAATTAACATGCGAAGCTAGCCGAG GAGTGCCGTATGTC  
TCAATCC ACTTATTC TCTGAAACAATTAGCTGATTT CAAAAA GTC GAGTTTC AAG GAAATGGAGCT ACT  
CTTC TTTC CGGAGT TGAAGAGATCGAGGAAGCAAAAACGGCACACATCAC ATTC TTAGATAAT GAAA AAT  
ATGC TAAA CATTTAAA ATCATCGGAAGCTGGCGCTATCATCATATCTCGAACACAG TTTC AAAAAATATCG

AGACTTGAATAAAACTTTC TTATCACTTCTGAGTCTCCTTCCCTAGTTTTC AAAAGTGTTTGAATTA  
TTCATTACTCCTGTTGACTCAGGATTC CCAGGATTCATCCGACAGCCGTTATCCATCCAACCTGCGATTA  
TTGAAGATCATGCAAA TATTGAGCCCTATGCTGTAGCAATCAGCATGCTCATGTTGGATCTGCTGCCA  
TATTGGGTGGGTAGCGTCATTGGAGCTTATTC AACCGTTGGACAACACTCTTATATCCATCCTCGAGTA  
GTTATTAGAGAACGAGTCTCTATTGGGAAACGAGTAAATTATTC AACCAGGAGCTGTTATAGGCTCTTGTG  
GGTTCGGGTATGTTACTAGTGCTCAAA GACAGCACAAACATTTAAA ACACCTCGGGAAGTCATTATTGA  
AGACGACGTAGAGATCGGCGCAAA TACAACCTATCGACAGAGGCCGGTTTAAA CACAGTGTTGTGCGTGAA  
GGTTCGAAAATTGATAATCTTGTGCAAATTGCCCATCAGGTGGAGGTCGGTCAACACAGCATGATTGTAG  
CTCAAGCTGGAAT TGCAGGTTCTACAAAGATTGGCAATCATGTAATTATCGGTGGACAAGCCGGCATAAC  
CGGACATACAAA CATTGCAGATCATGTCAATTATGATGGCTCAGACTGGCGTCAC TAAA TCTATTACTTCT  
CCAGGGATCTATGGCGGAGCGCCTGCTCGTCCATATCAA GAAATTC ATCGCCAAGTAGCCAAAGTACGCA  
ACCTTCCACGACTC GAAGAACGTATCGCAGCACTTGA GAAACTAGTCCA GAAA TTAGAAGCTCTCTCAGA  
ACAACATTAATTTAATTGAGCTGTCTCTGATGTAA CAAAGATATGCCTGCAAAAAGGCTTACAGAGAGCT  
CTTTT TTTTCAGCAATAATACCTTAATAAGCTT TTTTCGGATAA TTTTC CGGACACACTCTCCCTGTAGAGA  
CTAGATGCAATAAA CGTCTCTCGCTAAA ATTGAAATTCAGCTAACGACGAGAAGCTGAAA ACCTCTCCCC  
TTTATGTAAGGGTTTC TATAGCCATTTTCATCATCATG GAAAATATGGCTCCCAGAGAATCT TAAA CAAGAT  
CTATCTATGTTTACTGACAAGGCTGCTATGGTCCCCATAAGATCATAGTTAACG GAAATAGGATTTAAAC  
CATCCCGTTCTT GAGTAGAAGAATGAAA CACCTCTCCTTGAACAA CAAATGATTTTC TGAAGCCCTCGACA  
CAATTCGGAATACTG CAAATTATC TAAATC TAAAA TTTCTTATACATCAGAGCAATAGACACC TTTCTGT  
TC TTTAAGAAAAATGCCAACAGCTTCTCCAAGTT GAAAAAAT TTTCTTTCTCTT GAAAAGGTGCCCGAT  
TGATGTATGAACAATAGGCCTGCAGCGCATAG GAAACCGTTGTAGCTATCAATACGGGAACAGGTCCTTGC  
CTTATTCACCTGATA TAAATATCTATCGAACGATTC AAAAGGTCCGGCAGAAAACAAAATACCGCCCAAC  
TCCCTTTTCTCAAAGCAAAGAAA AAC TTTAAGAAA TCTTCCCATTCTAAATTC AAAGGAGGCGTATAGA  
AAAACAGTTGTGCTAACTGTTGTC TAAAAGACTTTAAA GAGGAGAA TAAATCACTAATATCTCGTAATTC  
TTCTTCGGAACAAG GAAAAGTTCCCGTATGCTTTAATGGTGCTGCCTGCACCGAGATTTTCGGGCTGTTGA  
GGACAAAACA CAAAATTC TTTTCGGATAGCTAAA AGTTT TTTCTCTAAT TTTAATTC TTTATCTTGTCT  
CTC TTTCTTCCAAAGATTGTTTAT TTTCTCCAGCGACTTCCGATAATCCGCCTACATTAGGAATCCCTCG  
AGGTAGGATACCAA GAAAGAATTC ACTATGAACTC CACACAAA TAAAATT CAAAAGC GGATATTGTATT  
TT TTTATCTGT TAAAATGCAACAAAGGA ACTCTATA GAAAACCCCTTATAAGGCCTTCTGAACAAG GAA  
AATGAAATTTCAAACCTTCAAACCACTTCACTCTATCCATT TTTCTGGGTAGTGCC GAAAAGTTTTTT  
CAAA TAGCATAGACTTGGCGCCAGCAGTATATATTATA CAAA CGAAGGCCGGACC TTTCCGGTTACTTT  
TTCCGCGCCGGCCTTGCATAGCCAGAGT GAAATTC AAAAGATTTACAAAAA GACATTCTAGAAT TTTTCA  
GGAACCC TTTATCC AAGAGAATCTATGCATCCCTCTG ACTCTCAACATAGCTTCTGAG GAAACTACAGAAG  
CCCAGTT TTTTCATGTTATT GAAA ACTTCG GAAATGCT TTTCTGCATTGACCT CAAAAA AAAATGCTACT  
CATTCGCGAACAAGATTCCGCGGAGAAGAGGCCTA TTTAGAAAGCCTTGTGGAGGAT TTTATCACTCT  
TATATCGGTCAAGAAGCTGTTGCTACAGCAGCTATTGCTTGCACAGG GAAA GACCACTGGTTTT TTTCT  
CTTATCGTTGTACAG GAGTAGCTCTGCTGCTGGATATCC TTTA CGACAACCTGGCAGCAGAACTTCTAGG  
GAAAGAAA CAGGGTGTGC TTTA GGACGAGGC GGATCTATGCATATGTGTGGTGATCGTCTTCTGGAGGT  
CAAA GTATCGTTGGTGGACAAATTC CTCTGGCTGCAGGTGCAGCAT TTTCTATGAAGTACCAAACTCAT  
CTTCTATATCTATGTGT TTTA TTGGAGATGGAGCTGTAGCTCAAGGAGTCTTTCTAT GAAACAT TAAATCA  
AATAGCGCTTCACTCCCTTCCCTTAATGCTCATTATT GAAAACAAT GGATGGAGTATGGGAACAGCCTTA  
CATAGAGCCATTGC TAAA CAGCCTATAGCAGAATCC CAAGCGA TTTCTTATGGTC TTTCTTCGATCAC CA  
AAAATGGATTCGAT TTTATTTAATTC GCTTATAGGATTTA GAGAAGCTTATCACCACATGCAACAAACAGG  
TTCTCTATTATCGTAGAGGCGCTATGTTCTCGA TTTAGAGGACACTCTATTTCCGATCC TAA TTTATAT  
CGCTC TAAAGAG GAAATGCAATGTCTTCTCAAAGAGATCC ATCC TTT CAAA CAAA GAATGGCTCATTC  
GTGC GAATGTCTATCC GAAGATGAT TTTAAA GA CAAA CGTCAAACAAGCAAAACAGCTGTCTTAGAAGC  
AGTCGCTCAAGCTCGTCTTGATCC AGAACCAGCTGTAGCTAC TTTA GAAGAGG GGGTCTATGCCAAT CA  
AATTACACTCGAAA TCC GAGAGGCTATTAGACAAGCTATTGATGAA GAAATGACCAGAGATCC TAACGTC  
TGTATCC TAGGAGAGGAGGTCGCT GAATATAATGGTGCTTA TAAA GTTAC TAAA AACCTCTTAGA TAAAT  
GGGG ACCCACTCGAGT TATTGATAC ACCCATTAGCGAAGCTGC TTTCTCTGGAAT TGGAATCGGAGCAGC  
GCTAACTGGACTTCGCCCAATTATT GAA TTTA TGAGCTGGAACCTTCTCTAGTTGCTGCTGATCAAATC  
A TTTCTCATGCAGCAAAAATGTATTATATGACTGGAGG GAAACAAA CTGTGCCATATCGTT TTTA GAGGCG  
CTAATGGAGCTGCTGCGCAAGTCTCTTGCCAAC ATTC TCATTGTGTTGAAGCTC TTTA TGCCAAT ATTC



TGGCTTAATTGTCATTGCTCCATCAACTCCAGCCGATGCAAAGGACTTCTTAAA TCTGCTATTCGGGAT  
AACAACCCCGTTCTATTC TTAGAAAATGAATTAGACTACAATCTTAAGGGAGAGGTCCTTCAGAA GAAT  
ACCTGATCCCATTTGGAAA GCTCGTATCGTTCAAGAAGGAAAAGA TTTAACAAATCA TTTG CATAGCCG  
CATGGTTTC TATCGTTGAGCAAGCTGC TAAAACAGCAAACAACGATGGGGACTC TCTATTGAAA CCATT  
GACTTACGAACGATCAAACC TTTA GATGTTGCC ACTC TCCTCACTTCTGTCAAAAAACAGG GAAT TGTC  
TTGTCGTTGAAGAAGGGCATTATT CAAA TGGTATATCTGCGGAAGTGATTACGACGATTACAGAACATAT  
T CAAA ACTACCTAGATC ATCC TCCCTAC GAGT CTGTCAAAAA GAAA CGCCTATGCCATATAA TAAA ACT  
CTAGAGATGGCGACTC TCCCAAATATTAACCGCATCC TGGATGCCATT GAAAAAATATGAGGTAACGTT  
GTGG TTTCCAAAT TAAA AATGCCTAAGCTCTCCCTACAATGGAAA TAGGGATTC TTGT TAAA TGGCACA  
AAAAAGCTGGGGATGAAATTCAT TTTG GGGATGTATTACTAGAAA TCTCTACTGA TAAAGCTGT TTTA GA  
ACATACAGCTTCTGAAGATGGTTGGTTATTAGAAA TTC TTGT TAAA GAAGGAACCAA ACTC CTATTGGC  
ACTC CTATCGCTGTAT TTTCAACAGAACAAAATGCTCAATATGA TTTAAAACAGCTCCTACC CAAA GAAG  
AAA CTGTTGTTACAGATGCAGCTACAGAAGCATCGCCAAAAGACTC TGCTCAAACAGATTC TCAATACAC  
AAGTGGCCCTTCCATAACTATGATG GGATTC CGTCCGGAACCACC TTTAGCTACTC CTCTAACTAT TAAA  
CATTC CAACGATCC AGTATTAGCTTCTCC TTTA GCAAAAAAATTGGCCAAAGAGCAAATCTAGACCCTCT  
CTGGAGTAACTGGTAGTGGACCTGGAGGACGGAT CA TAAAGAAA GA CAAAGAAA AAGCTCCTCC TTTAAG  
AAT TGCTGGGCAAA GTT ACCCTGAAGCTCCAAATGTTAATCCGGAT CTTATATAGAAGAACCTC TTTCC  
CCTGTTGAGAAGTCATATC TAAA CGTCTGCAAGCTGC TAAAACC TTTATTC CTCACT TTTA TGTAAGGC  
AGCGCA TTTACGCTTCCCCCTTCTTGCAATTAT TAAA AGAAGCTTCAAGAACAAAATATTAAGCTCTCTAT  
CAATGATTGTATTGTACGAGCCTGTGC TTTAGCTCT GAAAGAATTC CCAGAAA TTAATTC TGGATTCAAT  
AGTGTCGACAATAAGATT ATTC GGT TTTCTACGATTGATATCTCTATTGCTGTAGCTATTC CTGATGGAG  
TTATC ACTCCTATTGTCCGCTGTGCTGATAGAAA AAATATTGGTATGATCTCTGCAGAAA TCAAAGGACT  
TGCAAC TAAAGCCAAACAGCAGTCTCTTGCAAGAAGAA GAATACAAAGGAGGTTCT TTTCTGTGTATCTAAT  
CTTGGTATGACAGGGATCTCTGAT TTTACTGCTAT CAAAATCC TCCACAAGCTGCTATTC TAGCTGTAG  
GAAGCGTAGAGGAACAACCTGTAGTCT TAAA TGGAGAGCTAGCTGTAGGCTCGACCTGTATGTTGACATT  
GTCGGTAGACCACAGAGTGATTGAT GGATATCC TGCAGCCATGTTTCAAT GAAACGACTGCAGAGACTC CTC  
GAAGCTCCTTCTGT TTTACTTCTCAAT TAAA GAAGG GAATG TTTCCCTTCTTTCTTCTAAGAAGTTGGTC  
GGGAAA CATTCCAAATATTCGATGCAT ACTCAGCGATTGATCTATCGCTT GAAAAGA ACCCTATCCCCC  
TACATTG TAAA TAGACTTCTTCGTCC ACTCTT CAGGTTGCTT GAAT AAGCTTGCAACACGGTTCTGTGTA  
TTTA TATAGGCTTCCAAATCTGCAAGAACAAGAATGGATCTCCCTCA TTTAAAAGTCGGTTTCAATAG  
GTTTAAA TAAGTCTTATCTTCTTGA GAAA ACTTGGCTTGCGCAATCATATCAAGAA TTTCTT GAAT TG  
TGGACAAA CGTTACAGATGCCTTGAGGATAGTATTC CAAACGTAGCTCAGAGAT TTTCTCTCTAGAAGA  
CCAAAATGAACATATGCTC TTTCCGATATGTT CAGCCATTTT GATATTGGCACCATCC ATAGTGCCAA  
TTGTCAAGGCTCCGTTCAAAGCAAACCTCATATTC CCGTCCCAGAAGCCTCC ATTC CGGCTGT TAAAAC  
AAA CTCAGATAAAA TCGGTTGCAGGAATGATAGCTTCTGC TAAAGAAA CTC TGTAACAAA GCCAAAAGATG  
ACT TTTAGCTGATCGTTCAC TTTA GGAT CATTATTAACAACAGCTGCTACATTATTAATCAAT TTTA TGA  
TCAGCTTGGCCATAGCATAGCCAGGAGCCGC TTTA CCTCCAAAATGACCGTTGTCCGGAACAATCTCTCC  
AGATCCATTAC GGA TTTCAATTA TAAA AA TAAA TCACGCGGAGAATATTC ATAAGTTGACGTTTA TACTCA  
TGTATCCGCTTAATATGGCAATCAAAAATGGACTGAGGATTTA CAGTGACCCCAAGTTC TTTATAAA TTC  
GAGCTGCTAGTTCCCTC TTTATTC TGGAT TTTA ATATTACGCCACTC TTCCCTGAACCC ACTATCTTCAGC  
TAAA GGAAT TACCTTATGTAGATGCGTGAGATTC GT TAAATATTC TGTGCCTATCGTTCGGTTCAATAAC  
GAACTTAACTT TTTA TTG GAAA GAGCCAACCAACGCTAGGTGTAATCCATTAGTGACATTGA TAAATT  
TATCCGGGAAAAACTCAACAAAATCC TAAA TAGAGTACTT TTTA TAAGTTGC GAAT GAAAAGTGGATAC  
TCCA TTTACCTTATTC GTTCCAACAACCTGCTAGA CAAACCATAT TTTA CAAA TTTA GAACCTCCTTCCCTCG  
ATAATAGAAAAGAGCTCGACGCTTATCATTATCTCCAGGATA TTTCTGCGATACT CAAACTAGCCAACGTCG  
CATTAATTTCA TAAA TAA TTTCTAAA TGACGAGGAAGAACCTTAGAAA TAAA TC TAAA GACCATCTCTC  
TAATGCTTCAGGAA GAAT CGTATGATTAGTATAATT GAATATT CAAA TGGTTGC ATCC CAGGCAACATCC  
CAATCC AGCTCTTCACGATCAACTAA TAAACGCATCA TTTCTGCAATGCC TAAA GCTGGATGCGTATCAT  
TCAGCTGAACTGAGACTT TTTCAAGACAA TTTA TCTAGAGATAAAA TGTGT TTTA GTATAACGACGCA GAAT  
ATCTTGTATCGTAGCAGATACAAG GAAA TACTC TTGCTT CAGACGTA ACTC TTGCTT CAGAAA TAGAA  
TCATTG GGATAAAA GTACGC GAGTGATA TTTCTGCTAGAGCTATATCTTCGATAGCTC GAATGTAATTCC  
CGTGGT TAAAATAAC TAAATTC AAATCC ATGACGCGATTGTGCTT GCCACAAGCG TAAAGAATTC ACTGT  
ATCATTATT GAAA CCTGGAACAGGAACATCATAAGCCATAGC TAAA ACTTCCTGG GAATCC ACTA ACTCT

GCAACATCCCTACCTCTTGAGTCGATGCTATGCTTTACCTTCCCAAAAAATGTACGGGATATAAGTATT  
CTCCTCGACAAATCTCCCAAGGATTTTCATAACGCAACCATTTCATCGGGGACTCGACTTGAAAACCATT  
CTCTATCTTCTGATCGAAAATACCGTAATCGTAACGAAGGCCATACCATAAGCTGGAATCTCTAGTGTT  
GCCATAGAATCAAAGAAACATGCCGCAAGTCGACCTAATCCCCATTACCGAGACCCGCATCATGTTCCA  
TTTCTACCAGTTGATCGAAATCGTAGCCCAAATCAAAGAGGGCTTCTTTTCACAAAACTAGAAAGACCTAA  
GTTCAAAGATTACTTTTAAAATCTCTCCCTAGCAAAAATTTCATGGATATGTAGTACACTCGTTTTCACA  
TCGTTATCATAATAACTGCAAAATGTCCTTAAACCACCTTTAGCCATCCATTCAAAACAGTTTATAGCAA  
CGGCTAATAAAATATCTCTGGTTGATGCCGATTGAGGAGTCTGGACTACCCACAATATACCCPTTCGAG  
GATAGCTTGCTTCATAGATTC AACATTGATC AAAATCCGATCGAAA TACATAGAGGCTTCTCATGTAAAG  
AGCAAAACAACTTGTGAATAAGAAA TATTAATAT TAAAAGAAA GATTTCTATTCTCAACAGACGATACTG  
CAGAGGGTCTTGATATTCGGTAAA AAATCAAG TAAA ATGTTTCGCTTT TTTAGTTAAGGAGGC TTTATGG  
GTATCAAACCTCATGATTATGGCTGTTGGGGAAGTAGAGGGAACGTC TTTA CTTACAAGATCTGAATAC  
GCAGCAAGCAAATCAGAGCGCCGCTGCTTCTTCTTCTCTGTTTC TAAA GTCGGAAT GTGCAGCAAAAGTT  
GCTCGCTATGACTAGGATTCCTC CAAAGACTAGGA TTTATCCPTTC TATTGTTACA TTTA TTGCGGCAG  
CTGCAACTCTGCCTCTCGAACTACAACGATTC TTATTATGGTTACCC AAATAGCT CAAA CAGCCGCTCT  
CGCC TTTAAAC TTTA TGACCTATTC AAGCACGACGTGCCTACTTGTTCGATTACTTCAAAGGCGTAGTAT  
AATTC CCGAACGGTGTACAAGGAGGCGGCGCAATTGCCTGCCTCTACCTCTAGTCTTCTA TAAA ATCTA  
AACCAAATAAGCTGATGAAAGTCGC CAAATTAATTC TTGTATCGCACAAGAAA CATCGCACTCTCTATC  
ATCTTCTTCTAGTT CAAA CGAGATAGCTCGAATGGAA GAAATCACTGTAGAGTGGTCTCGAGAGAACT  
TCCCAATT TTTA CATATGACAAA GAAAGCTTCTGTCTACACAAAACATGGCGACCTGCCTAGG TAAAA  
CATATTC TCTGGACTGAGAACGACCTAGAACAC TTTTCGGAGAAA CGCCATAATATTGAGCTGTAGCACG  
AACAAATACGGATG GAGTTAAA C GAATACTCTCGGCAGCCTGCAATACATCATGTAA TAAA GCCTCTATG  
TCTCCTTGAT TAAA GCA CAAAATGT GAAAGCTTT TTTA TAAGCAACTCGCTTAGC TAAA GTTGTTAATGCGT  
GTAACAAAGACTTCACATGGGATGATAGAGCCTGAAT TAGAAA ATC TAAAGCAGTCTCCTCTATACGAAT  
ATTCAGTT TTTCTATTCTTCTTTCTAAA AAACCTTT TTTAATCC TCTCTTGT TAAA GGACTAACGG GAATC  
GAAATCC CCCACTCAAAGCGACTAATTAATCGTTCTTCCATAGCC TTTAAA TCTCCTGGAGCAAAGGTAG  
AAGAAA TCACGATCAACTTGCCCTTCTGTATGCAAC GAAT TGAAT GTGTGGAAGA ACTCTTCTT GAGTAGC  
TCC TTTA CCTGAGAGCACTTCTATGTCTTCAATGAACAGAGCTTCTACATTACGA TAAA ACGCTCGGAAA  
CGCTGCATCTCACCAGAAC GAATAGCTGACACCAGGTGTTCCG TAAA TAGCTCTGATGTAACATACAGAG  
TT TTTA CACCAGCTTACGAAGTCTTCCCACAGCAGCCTGCATCAGATGTGTT TTTTCGGAGC TTTTCAGG  
ACCAACAGATAAAA TAGGGTTAAA AGGAAAACC CAAA CTTGTTCA GAAACCTTAGCAAATTC TTGAAGA  
ATTC TTACAGGTAGATCATTC TCCG GAGTCACAAGAAA ATTAGCAAAGACATGTTTC GGATCAATGTCCC  
CATACTCATAGTGAAGTATGCAGTCT TTTCTTGCTGGATCTGAGTATCCT TAAA CGGTGTAGA TTTATC  
TAGGGAAGTCACGCGCACGC GAAT TGGCTTCCCATTTATTATTAAT TAAA CTAGC TTTA ACTTTA TGACGA  
ATATGCTCTTTCGAACCAAGTTACTT GAAA AGAATC TTTTCGCTTCCAATATAAGTTGCACGCATCAAAGC  
ATAGGACCTTCAAGGACCTCAGCCA TTTATTGACGGTATCCACTC CAATTTCTTTTC TTGAAGCAAAAG  
GA ACTC TTCCCAAGCTCGCATAAA ACTATCTCAGC TAAA TAGT CAAA A TAAA ACTATTC TAAT TAAA AAA  
CAGTACTACTTACCT TTTTCGGTATTC TCTATCTCTTCTATTGATAATTACTTTCATGCTGCAGATGTTGT  
TCATC TAAA AT CAAA CAAAT TACCC ATTGTTGGATA ACTC CTAGTAACATAGAAGAGAACCAG TAAA TAT  
TTA ACCCAGAAGG GAAA TTATAAAA ACAT GAAA GTAAA TAACAACGCCATCATTGTTCCCATAGCTTCTTG  
CTGACGTTGTTGATCTGACGCAGGACCAGATCG TTTACAGCA GAAA TTTTC TGTGAGCAAACATGACT  
ACACCTAGCAAAATAGGAAGAAGATGGA ACTC TTTCCGATAAAA CCATATAGGTG TTTCCCAA GAAA AGA  
GAACATCAGGAGCTGTCAAGTTATCT ATCCATCC AGGATAAAA GCTAGCTCCCCTTAATA GAAA CGATGA  
CTTCAA TAAATCGAACATCGCTATCAAAAATGGAA CAAATATAAGCAAAGGAAGACA ACCCGTTATCGGA  
TTAAC TTTATTCATCTTATACAAAGCCATAA TTTTC CAAAAGCTCGCTTAGGCTCACGCTTATA TTTCT  
GCTGAATCTCCTGAATATAAGGAGAAA GCT CAAA CATACGACGCATAGACC GGATAGACCAAGC ATTC AA  
AGGATAGAG TAAA AGCTTCAGTACGATCGTTAATAAGATAATA GAAA TTC CCAAAGAGCCTGTGAGGAAT  
TTAAA GAATTTCA TTATGACAAATAAATGCTGCAAAGGCTCAGTTA TAAA AC TAAA GAACCC TCT GA  
AA GCAATCGCATCAATAT ACTCAG GAGTTTC TCC TTTA GAATTC GCGTTAGCTCTATC TAAA GTT TTTAA  
AGTAGGGT CGGCTAGAGGCCCTGCATATACCA TAAA TTGATAACGCCAGCTTCC TTAGGCAAAGGTAGC  
ATTGCCGTATAGCCA GGATATTTTC GAAGCAGGAT AAGCTTGATC TTTTCGGAGGAAGTTGA GAAA GCCGTG  
TAGGAACTACATTC CCTGGAATAAA AGAAGAAGCATAGCCCGCTG GAATAGGAGT TCGAGGGGT TAGAAT  
TACCCCAAAGTACCC ATTAGAATTC AAAATCCATTGAG GAGTTGCGTTGTTCCGTACCAGCAAA GAATCC

TTAGC TTTAGGTAA TTTCACAT TAAA GAGATC ACTC TTATT TTTC TTCACAGCGTGATACTTCACAGCTG  
GAACAAAAGCGTTGGACATAATCTCAACTTCTGGAACGCCAGATGTG ATCCACAAATCTTCTCGTCCTTG  
AGTAG CAAA AATCTCTA ACTCAAAGGCGTAAGGCTGCTCTCCAGC GAGTAGGTT TTCTAATTC CACCA  
TCCCGCTCTC TAAA AT TAAAGT TTTA TTATC GAAT GAAACAACAC GAAAGCCGGTAGCAACAGGAGAAG  
CCAATTC TCTTCT GAAA CAATA TTTAAA GCTTGATATTGTGCAGGC ACTC TCTT TTTAACATCAGATAG  
CGTTCACGTCT GAG TAAAGGAT AATAGCCTCCACAACA CAAA CTATGT CAAA ACGTTGAGAAT CGATA  
G TTTC GACTCCGGG GAAA GAGGCTTCTGAAGGA GAGT TAATTGCTA ACTC TCTATCAA ACCCAATCTCAT  
TAACAATACT TTTA TTC TCTTCTTGATCAGAAGCAAAGGAAGATTA ATTC CCTCGATAGCTCCAC TTTC  
TTGA GAAA CTACAA CAAA CATGT ATTC ATTGGAGAGCATGTAGTAGCTACCAGATGCTGTAGGAT TTTC T  
TTA TCAGCAAAGACTACAGCCCCTGCCATAGGGAGATC TAAA GACTC AACAC ACTC TTC TTTAGAAT TAT  
AAA TACC TAAA GGTACAA ATTCATTC CCGGTATTGA GAAAACTAATGATGTGCCGTAGATAGCGCCCGC  
TTTA TTC GCAATCTTCCC ATCC TTAT ATTC TCTTAG GAAA ACAAGAGGCTCCTGATTGCTAC GAAA TTC T  
GCTAC TAAA ACCGG GAAA GCATCTC CAAA ATTAGGGAGATATACAGA ACTTCC TTTC GACAAA ACTTCTT  
GCCAG TTTC TCCATAGAGG GAAA CAAGGATCC CTCCAAAAGTACTGGTCTGTCTATCAG ACTC CAAGA  
AGTTCCTCTGGAAT AGACTTCAGGAT GAGATCC CCT CAAA TCAGCAGCAA TAAA CGATTC CCCAAACGA  
ATAGCATACTGATTGACTGATTC GCTCTCCTCAAGAGAAGCTGTCCAAGGTACTAC ACTCAATTGCTCTG  
TTGAAGCTAATA CAAA CTCAGAAA TAGCTCGCTGCT TTTC TGCAAG ATCC TGGCATGACTTCAAGTCTCG  
ATAACCGAAG GAAA CAAA GCAGCCAAAATGCCGCGCTTACCAAG GAAA CAAAATAATAACGTTTCG TTTA  
TTCATTC TC ATCC GAGGTGGGT TCTCCCTATGGGGAGGGAAGCCTCGTTCCTATCAAGGTTGC TTTAATT  
CCCTAATCAAAAAAC CAAA CAGAAA GACAAAACCTCTCCAATTC TTGTGAGAAT CGTCT CAAA CTTAC  
AAGAG ATTC AACTC TGCTCTCCGAACGGAGCTTCATACTATGTA ACTTGGCGTCAT TTTA TAGAGGGTG  
TCT TTTC CATGCACTTG GAAA ATAACC ATCC CCCCTCTCTACATCAAAAAG TTTA ATGTAGAGT CGC TTT  
CAGATGTGGACGCTAGCAATATAT ATTC AAGAC CAAA CATCATTTTT TTTA CTAGCAATCC AAATGAT  
TCCA ACTC CTA GAAA AACCATCG GAATAGACAACCATTGCCCAATTGTTAATATGTT TTTC TTCGCCAAGC  
CATGCTCCTTGGTGTGT CAAAAA AATTC AGCGCAAAAAC GAAT TACTGCT ACCCAAT TAAAGCGCCTG  
CTGCAC TATAGCCAGA ACCCAAAC GAATAACACCAGATAGCAAAGCCTGCACAGAAT ACAAGAAA GCAC  
TAAA TAACCAAGGCC TTCG TAAA GCTGAACAGGAT GTCTAG GGA CAAAGCCTCCACC ATTC GAAAAAATC  
ACTC CCCAAGGCAT GGAT GTAG GGGT TCCTAGAA TTTC CTGATTC A TAAAGTTCCCACGC GAAT CAGCA  
AAGCTGCACAACCAAACACTGCTCCACAAGATCGCAAATGTAGGTTACT GAAA GCATAGGCAACTTACG  
AAT ATGAAGTCGC GAAA ATACAGCTGCCCAAATCACCACAGAGATCACAGCTCCATGACTA GAAA GCCCT  
CC TTTC CATATT TTTA TAATCTCAGAAGGAT TTTC AAAA TAAA AACTC CCTCCATA GAAAAGAACGTAAG  
CAAGCTAGCTCCAATGATGATAGC TAAA AGAGCTCC TAAAGCAAAAAT TTTC CAGACTTGTTCCG GAGTTC  
TTT TTTC TCCTCCCTGTC TTTA CACAATGCTGTGCCAGCTTGATGCC GAAA AAGATGATAAAA AAT  
CTAGAGAAAATAAG ATTC CGTACCACGATAAAA TGAAGCCCAACTC GCGGAAA GATAAGAGAGT TCTAG  
ACTGGTCCCAATGTATCAGGTT TTTA TCACCTCTCTCAAAA GAAA AACTTTTCTAAATAAAA AAGACTA  
TGCCAAAATTT CAAA CTAGCAATCTTGCAAAAAGATCTTCGCACGGT TTTC TCTCTCGTCAGCTATAT  
TAGTTGCTT CAAAAA AT ACTC ATGCTAGAGT TCTCCTAATACATAAGTTCCCTCAGGTCT CAAA CGCAA  
GCTTACAA GAGT GTTGCTAGGGACA TAAA ATC GAAT CAATTT TTTC ACT GAGT TGC GTTATGC GAAA ATT  
CTGGTACTTGCTTC TTTC GGCCT CAAATC TTTA ACTACGACT ACTC TTTC TAGCTGTGCTGTATCTAAT  
TC TGGCAGCTACAATGCTAGACTATACAC TAAA GGGAGCAAGGC TAAAG GAGT CGTCGCCATGCTACCTG  
TTT TTTA TCGAACA GAAA AGTCTGCAGA ACTACTC CCTTGGAAT TTA CAAGCA GAGT TTTC CGAAGAGAT  
TAGCAGACG CAAA CACTC TTCTGA TAACTACT TTTA ATCAAACACCACGCTTCAGCTGGTGTGCTGCA  
CAATTTT TTTC TCCTACTCCTAATA TTTC GCCC GAAT TAGCG ACTC AGCTGTTGCCGTGCGGAATTC GTAG  
TTGCGG CAGAAA TTTA GAACAGAAA ACAACGGAAGATGT TTTAAA CCTTCTA TTTC CAGCATCTGTTTCG  
TGTGC GAGT G CAAA ATATTC GTCAACA TAAAGTCTCTATGATATAACCAAGAGAT TTTA GACGC GAGT CAA  
TCTCTCGCCTCTGGAAGCAACGATTATCATCGTTATGGCTGGCGTTC GAAAACTTCG ATTC GACTC CGA  
TGGGCC TCAATGCATCAGAGATTA TTTA GAGAGATGTGTTGCTCGCGTAGAGGGAT ATGCTGCGCAA ACTA  
CTC TTGATATATGGT GGGT CTAGGACTTCTATTAGTT CAAA TTG GAAT TTTC AAT TTTC CTTGCGAAC GGG  
TTT CAAA TATGGCCAAAGCCT GAAA AACAT ACCCA TTTA ACCATTC AGCTTAGTGTGCTTGGGGGCAGTGT  
TATTGCT TTTA CCGGCTCTGCTCCCACCGGAGATCC TCT TTTC CTCTA TTTCTAAA GCCTCT TTTC ACGG  
CATC CAAA TCTTTA GTGCC TTTC TTTT TTTA CTATTG GGAT TACCGGCTCCTATC ACCCAATCTAT CAAA  
TATGCAGGAAGAACAAC TAGCTCAACTTCATGGTTACTTGCCATAAGAGCTGGTGCTCGCATGT GGGT TA  
TTACCATTACCGCTACAAAATACTTGCACGATTATTACAGCTTGTCTGCC ACTC AT CAAA CCCAAACA

ACTT **TTTC**CAAGAGCAGGTGATTACGGAA**GAAATTC**GAGAACAGCTATCAACTAGACCGGACCTTCTCTAT  
AT **TTTC**TGTATAGCTATGCTG**ATTC**CTATTGCTGAA**GAAATCTTT****TTTAGAG****GAATTC**TCCAAAC**TTTC**T  
TCAAAAATACAT **TTTC**TAGAAG**TAAA**GCTGTTGTAACAAGTTCATTGATC**CAAA**CTATCACGCACATAGA  
AGCTTC **TTTAGG**TAGCTTCATC**CAAA**TGCCAAC**CAAACAAATCT****TTTC****TTTA**TGCGCTGGC**TTTATTTAC**  
GAGAAGGTACGGCATATCGCCGCTCCTGTG**ACCC**TGCAT**ATCC**TGTTCAATAGTTGCCAACTAGCGTTAC  
TGTCCTTA **TAAA**AAAAAGAG**GGAT**GTGACAAAA**GGAT**AGATAGA**GAA****TAAA**AAAAGTAAGCCAGA**GAAAA**  
**CTC**CTAGCACAAAAGGCCT**ATCC**TTAGGGCTGTACCTTCCG**ATCC**TG**ACCC**GGTTCAGAAGTCTCTCAT  
CTTAAGAGGTCCCCAGCTCACG**GGATC****CAAA**GTACCA**TAAA**TACAGT**TTTC**TCTCAAGTCTC**TTCC****CTA**  
**AA****TCC**TTATTA**GAAA**TTT**TTTC**TTGCTGT**TTTA**TACGAGCCAGT**ATTC**TT**CAGC**CTGTTC**TAAAGAAA**  
**CAAA**ATTATG**GGAT**CAAAAACATGAGGAGATCGACGACGCAACTTAGCCAAGGCTTCTACAAATACTTC  
TTCAGC **TTTA**AGC**TTTC**CTTCTC**TTTC**TAGCAAGAAGCACAAGGTTAATAC**TAAA**GTAAGTACGTCTCCG  
GCTTCCGAAGCGA**TTTC**CAACGAAGC**TTTA****TTTC**TTGTACAGCATCAGCCA**ACTC**CTGAC**ACTC**CCCTG  
CTATATACTGCAACATAG**ACTC**CAC**ACTCTG****TAAA**TTAGTCCAAGGACAA**ACTC**CTTG**TAAA**GCCATTGC  
TCGC**GAAATTTTC**AACCAATTGTAAGATGCCTT**TTTC**TTCCATA**ATTC**ATA**ACTC**CTTCAAAAAAAT**GGGTG**  
GTGCAAG**GAGT**TA**TAAA**AAAACAT**GAAA**ACCC**TCTCT**CAAGCG**GAAA**AT**CC**TAAGCTACAGTTGAGGAA  
**CCC**GTAGCCGAAG**GAAA**AAAGTG**GAATTC**TTCTAGTATTT**TTTA**TACATAATG**GAATAATCCGGGT**CCG  
CTCACAA**AACCC**AAATC**GAAT**GT**TTTC**TT**CAGCA**ATTGTT**ATTC**TA**ACTG**CAATT**CAAA**TCTTGTGCTC  
**GGGG****CAAATTTCTTTA**TGCGATATAGC**TTTATTC**TCGCTCCCTTCTTCCCTTATTGCTCATTACAGT**CAC**  
**TC**AAAAAATAGGCAGCTCCGACAAATGCCAATCTTATGGCCT**ACCC**CAATCA**CAAA**CTCATA**ACCC**TAG  
TCTTCTTCGACATAG**GGAT**TAATATTG**GAGT**GCAAAACTGCATAGCAACCTTAGTAGGCG**ATTC**GGCATC  
TCTATTGCTTACCGTAG**GAGT**TCCCTCGC**CAAA**ACACTAGT**CAAA**GGAGAAA**TTGTCC**TAAGGTTATC  
GCA**ATCC**CTTACAATGCAC**GAAT**TGCAAAGATTGTA**ACCC**CAATCATC**CAAA**CTCAAC**TAAA**AGCTTCC  
GCCCTATA**CAAA**ATTGGGCTATCTC**GGGT**ATCAAT**TTTAT**CGTTCA**GAAA**ATGTTGCCCCG**TCAA****GAAAG**  
TGAT**TTTATTC****AACCC**CA**GAAT****TAAA**AGAAGTCTCCGAAGCTG**TAA**AGAT**TTTC****GAGT**TG**TAAA**TCAT  
GAG**GAA**AGTCGTCTTCTAC**CAAA**GCTATCT**ATCC**ATGGAAGAAGGTAGCATT**TAA**GAACGCATGACGCCCA  
AACA**GAAAT**CATTT**TTTAT**GATGTCCTT**ACTC**CGATT**GAAA**AT**TTA**TATA**AACTC**TTCTCTGGACC**TAA**  
**A**CAAAGCT**ATTC**CAAAGTCTAG**CAAATAAA**GGTGGTCTACAAAATCTCTTAG**GAG****CAAATTC**TGCAAAA  
TTGCTTCTTCTCTACAA**GAAA**AATTACAATCTGCCGAAGA**ACTC**TTGCCTCTCCTT**CGTAAA**CTCACT  
AC**ATTC**CT**GAAA**CAGTATCAGCTAAGACAGC**CAAA**TATCATCTAGCAGGAGAAGACTGTGG**TTTA**GGTAT  
TATCATTGAT**GAAT**AT**GGGT**CTATAGA**GGAT**TGATT**ACCC**AAAATGATCTAT**TTTAAA**ATAGTCTCTGAT  
GAGGTAGCTCATAATCGCCATCT**TTTAAACAATTC**GCT**CACTC**AGACA**GAAT**GTTGTTATTGCTGCAG  
GCACCTATGAGC**TTTC**TGAT**TTTC**TATGACCTG**CAAA**GAGTTGATCTTCTACTACAGCTAATTGCGTTAC  
CATAGGC**GGAT**GGCTGACAGAACAATTAGGA**GAAA**TCCCT**GAAA**CAGGAACAAA**ATTC**GCTTGGGGACAA  
**CAAA**T**ATTC**CAAATACTAGACGCGCTCCTAATTGTGT**GAAA**CGGGTGTATATAAG**GAAA**ACCCATG**GAA**  
**ACTA**ACTCTCCCTT**TTTC**TGGTTAG**GAGT**GAACCTCC**CAAA**TATT**CAAA**TCCAAGGGTCTCT**TTTC**CATGA  
TG**GAAA**TGGCTTGGTATC**ATTC**AATCGCGTGGGTTGCAATACTACCTTAC**GAAA**AGCA**TAAA**AAAGC  
CTCTTACATTA**ACTC**CTTATTAGAAGACCTTATCGCTTA**CAAA**GAACCGTAATGTTGG**GAGTAAA**TATT  
GC**CAAA**CAAATA**GGGT**CT**GAGT**CATCACGA**ACTT**GTTACAA**ACTC**CTAG**GGATTTTC**TCCT**GAAT**ATGCTC  
CTGCAACGCAAAT**TAT****TTTAG**TCGTCATT**CAAA**CT**GAAT**TA**ATTC****TTTAG**CTATCTCTCG**TAAA**AT**TC**  
AGAAA**AAAT**CGCCT**TAAA**AGGAGCCCCT**ATCC**TCTA**TTTC**GCTCACTATCT**TTTC**TATCCGCTCAT**CCAA**  
TGTGTCGGTGGCATTACCAATATGATCTAC**TTTA****TTCT****GAAT**ATTAAGGAAGAGACG**ATCCACTC**AACGC  
TTAGCCGAGAT**GAAT**TGCAAAAGACATT**GAAA**CTC**AT**CATGAAGAGCATGA**TTTC**AATGTGATAGCTAC  
AAATAT**TTTC**TC**TTTA**AGCGCAACTTCTGTAGAGCAAGTATGTCAATA**CAAA**GACCAA**ATCC**CTATAC**TT**  
**TC**AGCTACCGCTTCCGTACGAGATG**CAAA**CCAGCTCGTTCGTGCCATCG**TTTA**GAT**CAAA**TCCCTG**TTT**  
**ACCA****TAAA**GT**TAAA**AA**GAAT**GTAGTGG**GAAT**AGCT**TTTC**CAAAAAACCTCATT**AATC****GAAATCC**CAGTGA  
**CCC**TGTTGTCCCTTACCTAAGCTCTCCCTGGTTCATAACAGCCAAATCTAAGCTC**ATTC**ATGCG**ATCCAA**  
**GAATTC**CGCA**GAAT**AGTTC**TAAA**ATCGCCATTGT**TTTAAA**TAATAATGGCGAGCC**TATGG****GAGT****TTTAG**  
GCTTACATACGGTG**TTTAAA**ACGTT**ATTC**AA**CACA****GAAATATC****ACCC**AAT**TAAA**ACCCAA**ACCA**ACTTC  
**TTTA**ATTGAAC**GAAC****TTTC**CTCTGGGAACACACC**CAAA**TCT**GAAA**TA**GAAA**ATGAGCTCGATATTAT**TTT**  
**ATGGAT**AATGATTGTACAACAATTGAGCA**ACTC**CATGT**TAAA**ACTTCT**GGATACTC**CTCCAGAAGTAGGCG  
CCTCTATCATTATCAACGACCTACTGTTAGAGG**TAAA**AGAGA**TTTC**CTTGTACGGCATCAAA**ACTG**TTGC  
TATCAAAGAC**ACTC**TGTAACGATTACGCGTACTGCTGTAAGTGT**TTTA**CAACCG**GAAT****ACCC**TCTGTGC  
TGCTGTAA**GAATTTTC**TTCTTCT**GAAA**G**TAAA**TAAC**TAAA**AGAAA**ATCG**TAGAGT**AGCT**ACTGCAAGATCT

TGAGGCAC TTTT ATTACTGTTAATGACT TAAAA AACTGTAGTTGCTCCAGAAGAACACGCAGAGCCATAAC  
CACAAGCC ACCC CTTCTAGATC TAAA GCGACAAA CATCACTTCTCCCTC TAAA CCAGG GAAA GCTATTGC  
AGAAA GATTGCTAACTC GAGGCTTGTCTTGACAATGCACGATAC ATTC AGG GAAA GCTTCTTGATACGC  
GACTC AAATAG ATCC CTATAAGAACGCATAG CAAA AGCTATGGCAGGCTGCTCGACTAATAACTTGC TAA  
AAATATAACGCAGGGAAGCAATACCAT GAAT ATGCTCCGTTCCCGAAC GAAT ACCTCTTGTGTCCCTCC  
TCCA GAAA TTATTGGAGATAT CAAA ATT CAAA GAGATGTAAGAAGG ACTCCGATTC CCGAAA GAGCGT GA  
AA CTTGTGTCCAGAAA AAGCAACCATT GAAA CTCCTCTGGAAT GT GAATAACTTCT TTTT CTACAATAG  
CCGTGGC ATCC ACTATCAAAGTAGTTGGCGTTC PTTA GCAAATTC GGCTATAGCTTCAAGATCAATTCT  
TACACCAACCTCACT ATTC ACCCATCC CAAAACGATGGCTGAGGTATCTGATTGAACAGCTTC PTTAACA  
AA TTC TAAAGAAA CAACGC ACTC TCCAG GAATA GGGT CCAAGTAAGTCACG GAAA GC CAAA CTTGC TTTA  
AA GGTTCGATCACTGCT GGAT GTTCCATGCTGGAAGTAATAACATGGCTTCCTGTAG GAATAT CAAAAT  
TGCCAGGTTAAGAC PTTT TGTGCTCCAGAAGTA TAAA TCACCC GACAATGAC TAAA CCCAGAGCTTT  
TC TATAAGAGT TGAAG TTTCTTTA ACCAATTT CAAA GT TTTCTTTT CAAA ACTGTGAACGCTAGAA GGAT  
TCCC GA ACCC ACCTTCGCCTAT GAAA AGA GAAT G TAAA CACATCAAGACGCCAGGCTC TAAA AGAGCTGA  
AGCGTTCGTATCTAAGTATATAGTCA TAAAA ATTAACGC ATCC GAACCAGTATAACAGTAGCATTATCTC  
TACCGCCCCGACTG CAAA CTAAG GAAA TAAGGATATTC CCACCTTCTTCCAGAGT AGTCGTCTGCGTTAA  
TATATCTAGCATGTCATGATCAGAAA CAGCACTAGTTAGACCATCAGAACA AAAAA CAAATAGGTCCTCT  
TTT TCATAAGACATCTCTCTAATATCAAGAGACACATGGGGACGACTTCCCAAAAACA CAAA TCAGAACGT  
TCCTTCCAGGAT ACCT TTTT ACAC CAAAT CAAAAA GCCCATATCGAGAAGCTAAGTGATTC GCAAGAGA  
AT GGTCTTCAGTTAATC TTTT TAGCATCTTATTTT TTAATCGG TAAA CCCGACAATCTCCACAT GAAAT  
AGCCAAGC TTTA CCTCTTCGGAAT TGCATACA ACTC AAAGTAGTTCCCATACC CAAA AATTCCTCATTCCG  
ACA ATCC CTGGCGA TAAA TTAATAAG TTTA CCTCTGATACTATAGTC TTTA TAGACTCTTTA TACTGCTC  
ATCTCAAACCGTTCCAAATCTAC TTTATGTAAA TCGACAAGCTGCATAAGATTACCAACAGCCTCATAA  
GAAGCTACTGCTCCTGCACGATGACCTCCC ATTC CGTCTGCAATGGCAATGAGCTGC GAAT CATAG TTTA  
CCTGCCAAAAATCTTCGTTGTTGTGCCTAAC TAAA CCAACATC ACTCAATCCAAAGT ATTC GAAA TCCGC  
AACAATCATCACGCCCTCTCCGCCAAG GAATTTT CATAGACGGTTGA TAAA TCAATCGCTTAAGATTCT  
CGGAGGTATAGCAAAG ATTTCT TTTTAAA AAAGAAA GCAA ACT TTTA TCTGTATAAAA AAGGTTGTTAATCTG  
TTTT TT TTTTAAAAAAAAG CAAA TG TAAAGAGGGTCTATCTCCAAAAGATGGGAAGAA GAAA TT TTTATT  
CTCCCTTCCCCCATCAAACAGAAGTAT TTTACTC TGCC GAAA AAACAACACTTAAGTATAGTTGGGTAT  
CAAAAGTTGCCTCCCT TTTAATA ACCCGTACTTAGAGGATTC GTACAATGACAACGTGGAC CAAA AATCA  
CAATAATCTTACAAA ATTC CTG ACCCATGCTCAGCTAGAACCTTC TTTAGAACGA GAAA GCGGCTTAATC  
TATATCACAGTCCCTGCGGAGAACATGAGCTTCCCCTCTT TTTT GTT ATTC GTAATGAAGGAGAAGT CA  
AA CAACTTGTCTGCTA TTTT CCTTATCAAATACAGCA GAAT CAACGTGATACCACAGCAAGGCT TTTA CA  
TCTCGTCAACCGCAGCATCGAC ATTC CAGGACAAA GAATGGAT GAGGAACAAAACATTATTTT TACCGT  
CTAGTT ATCC CTTGCC TAAAGGGCGAGATTAATGAGGACTTACTACGT TTTA CATTGATACAATCAAGT  
TGA CAAA TGATAGCTTCTTCATGCAATAGGAT TGATCTCGACAG GAAA CAT GGAT CT GGATGAATT GAA  
AAAGCAAGCAAAACTA GAAAATAACCA ATCC GATCAGCTAGAGCCTTAGAGGAAC TTGTGCCAGC TTTAA  
TTT TTTA TGATACA GAAA CGACAGGTACGCAGATAGATAAGGAT CGTATAGTGGAGCTAGCTGCTTACAA  
CGGGACTACGAGC GAGTC TTTT CAAACGCTAG TAAA CCT GAAA TCC CTATACCTGCTGAGGCAAC TAAA  
ATTC ATGGTATTACGACTGCGGAAGTAGCCGACGCCCCAGATTC CCAGAAGCTTATCAGAAATTTA TCG  
AAT CAAA TGGTACAGATAATATTC TTGTAGCTCACAATAACAATGC TTTT GATTATCC TCTGTAGTTTCG  
TGAAT GTCTGTAGACACGGCTTATCTGAGCCTCAGCTTCGTACTATAG ATTC GT TAAA ATGGGCAAAAAA  
TATCGAACCGACTTGCCTCAGCATAGTCTCCAATACCTTCGTGAGGTATAC GGATTC GAA GAAA ATCAAG  
CGCACCAGCATTAGATGACGTAATC ACTC TTTA TAGAGTAT TTTT AGC TTTA GTGGGAGA CAAA TCTCC  
TGATCAA TTTA TGATCTAC TAAA TGAGACTTGT CATCCTCGCATA TTTAAA ATGCC TTTT GGTAAGTAT  
AAA GG GAAA CCTC TTTT TGAAGTCCCCTCTAGTTACATCGCCTGGTTACAAAAGGTGATTACTTGCTAC  
AACCAGAAA TAAAGAAA TAAA GCAGCCATTGAGGCCTATCAGCAATT GAAA TGACTT TTTT AGCAGCG  
TTCTC ACCCTGTCTAATGACATC TTTT TT TTTT GGTC TTTT TTG GAAA AACA TAAA GGATTC CCTTCGT  
TACGCCAATCATGATCGC GGATA TTTT TTC TTTAAA TTATTACGC TTTAGAGACTC GT TTTT CCCTAAT  
TAAA TTTT TGCAAGCTTATACCCACAGATCGCTGATTCCTATGATGT TTTAAA TGTGGCACTACTCTG  
GGAT ACAAGATCGGGCC TTTAATTC TTTT CAAA CAACTCGATTC CCCAT TAAA AAGCCTTGCT ACCC CAG  
GT GAAA CGACAACAGCACAGCTC CAAA CCGCTCTTCT ACCC TCGAGCAGA ACTGGTTCCCTAT GAAA TA  
TCAT GAAA TCATTC CAGCT ATTC TTTT TAATC GAGT AGATGGTGGAGCTGTG ATTC ACGAAGAACGCTTC

TC TTTCC TAAAGATCTATGCATAGTAGAAGATCTAGGTCAAC CAAAG GAAA AACTTTGGCATCTTCCCT  
T ACCCTTAGGATGTATTGTTATCTC TAAA AAGGTATCTGATGACGATTCTTATCTGTAAAGTCATGCTCT  
TCAAGAATCCC TAAA AAAATC CAAA ACTGATTC TGC TTTAGCTATTC AAAAAAGCTTCT GAGTACTC TCGA  
GAT TAAA AACCC AACTACC ATTC AACAT TTTA TAGATACCTACGTAACAGAA GAAA CC TTTAACCTCTCTT  
CTATCGGACGGCAAGCTT TTTCTACATTATGGACGGCTTGTGCGTAATG TTTAAGTCCTTCTTATT CAAA  
CTGATCC GGCAGAAGCTGCTAGAAC ACTCTCTCTG TTTCTTT TTTCTCTTAATAAGGAGAACT TTTA TAC  
CTACCATACA GAAA AC GTTCTGTAGATGTTATGGTAC TAAA AACATG GGGT TACCGAG GAGT TGTTCAA  
GCATTAAGCCCCCTCCAAGT GGAT ATGACCTGT GGATAAATGCAG GACAAA CCGGAGCAGCCAATCC AA  
ACATACCTCTTCT TAAA ACTTATACGATTACCTCTG TAAA AAGAAT TA ACTC CAACA ACTTCTGTGGAAGA  
AGA ACTTGAAGTAA ACCC CCATCC TAG ACTC CCTCTAGCACAATTGACATCAGTCAGATCTCCGTATAGA  
GAT GGG TTTCTATGAACA TTTA CAGCTAGTCGATATGGAA GGAT T TTTCTATAGCAAAACAGGCTTCGTTAG  
TAGCGTGCCCATGTTCTATGAT TAAA GTATCTTCTGACTACACTACGCGGAAGGACAAGACTTCT TAAA  
AAATAACAAAGTCAAGCTCTCTCAAAAATTAGCGGAGGCTATC TTTCTCGATAT ATTC CTG TTTA TTGAT  
G TTTA ACAC ATCC CTTCACGGACCATCAT TTTA CGACGGCATT GAGT TCCCAGTCTTAGCACCTGATA  
AG ACCCAC ATTC CAAAAA AGCTGGGCAAGAGTCTAATAACTC TTC CAAA GTTCTTCTGCTAT TTTCTT  
CCCTTGTTCCAAG TAAA CAATCC GATCTACGT ATTC GAGAGT GGAGAGCTTGTGGGCAATGATAA CAAAT  
GTACAACGGCCT TTTA ACTGCCCGACTATCTC TTTA ACATAAT TTTCTGCTAATGGC ATCCA ATGCTGATG  
TTGCCTCATCTAGCAACAGAAT GGAGGTGTTATGCAGCAATGCTCTAGCTATTGTCAAACGTTGCTGCTG  
ACCTCCAGAT TAAA TT TTTACCGGATTC CTCTAATAAGCTGTGCACGCCTTGAGGCAT TTTAGAAA CAAAT  
TCGTAGGCATGAGCTTGC TTTAAA GCAT GAAA TACTTCTTCTTC TAAA AAGGTTCTGCCACAAGTCAGGT  
TATTC CACACCGTATCATAGAAT TAAA AATGGAT GCTGCAGCACACAACCAATATG TTTCTT TAAA GAAT T  
CAAA CAGTAGC CAAA TATCGGAAGT GAAT CAATTAACAGTTCCCATGAGAGACTTCA TAAA GCCTTGGC  
AATAAC CAAA CTATGGTAGAT TTTCCAGATCC TGTGGACCAACAATACCGATAGCCTCCCTTTT TTTA  
ATACTAAGTT GAAA TCCGATAATACGGGACTATCC TCTACAT ATCCA AAGGAT ACATTACAAA ACT GAAT  
ACTATGTTGTAATCCCTG GAATTC A TTTA ACT TTTCTAGAAA CATTGGACTGCTGC CAAA CTAGATCCAAT  
ACTTCA TAAA ACCGTTCTGCAGCAGCGC ATCC CCGCATGATATTC GCAT TTTCTATCAGCAA ACTT TTTAA  
TC GGAT CATAAA TGAGATACAAAAGACCACAAAAGACCACAAGCTCCTCAGGTG GGAT AT GAAA ATGATA  
CAAACCGATCATAATGACCAAAGCAAAGAACAACGAGGCAATAGTGTGCAGAAGAGGTCTTGGAAAT TAAA  
CTATACACAGCACTGCGCTCTTCCAATCGAGCAATCTCATCATT TTTCTGACAATACTTAC TAAA A GAAA  
ACTGCTCAGTTC TAAA TACT TTTA CTGTAAGAAT ACC TAAA A GAAA ATCCAATAACGCAGCGGCA GAATG  
ATCTTG ACTCT CAAA AATTCG TTTA GCCAATGC TTTA ACT TTTCCAAA CAATGATAACAATTGGCAAATA  
AAA ATAGGGAACGC TAAA CAAACACAAGCACAAA TTTCCAA GAAA TAGACAAGCACACTACTAAGGCTA  
AA GTCATAGTGATAGGAGCCT GAAT GTAATTC ACCATAAGGGCATTAATAGCTAATGCAATCATAGATGA  
ATCTGCTATCACAGCACTTAGATTC CCCATATCGTGTGCAT GAAA GAAT GTCATCGGGAGCG CAAAT  
AAA GCTAAGAAGTAATC TTTACG TAAA GAGCAGCTCACAC GAAT AGCAATTAATGTGCT TAAA AACCTCT  
GAAA AAATAGCGTTGTTGAT TTTCAAAATAGCAACA ACTACTAGAAA AAGCGGAGGCATTGCAAACGAGA  
AA AGTCAAACAACCAGAGAGATAGGCG GAAA GCCTT CAAA TTATTGACTGAGAGCCTCCT GAAT TTTCT  
GCAATATAAGC ATTC GCTTGAGGCAAAGATAGCGTGTCTCCCTCACCAACAATATT ATCC CACTGTTCAA  
GAAGTTGATC CAAA GACAGCTC TTTCT CAAA ACTAAGGAAGCTCCCTCCTGCTTCCCAAAAAGAA GAAA  
CGTATCAGGACCTGTCTTAGCAATAAGACCTAGA GAAA AAA TTTCTGCTTGAGACGTTATCGTTAGCCCT  
AATAT GGATAAAA AGA GAAA AACC GAA TAAA AC TAAA TGCTTCTTATGCCTCAGAAT CGC TTTCTAGAAGAA  
G TTTCTATATAGACCTATCGTTCCG GAA TTTCTGATATCGTT TTTCTAGCAACTC TTCTACCGGTAGATCTT  
TCAA TTTAACCCATTC TTGAAGGACAT ATTC TTGAACACTACGATATGTGGCCGCA GGAT TGTGATGAGC  
CCCACCTAT GGGTTC CAAA ATCACTGCGTCCACAATAGCAAATCC CTTAAGATCC TCTCCATGCATT TTT  
AACATGGCAGCAGCATCACTGTTCTT TTTAGGATC TTTCCA TAAA ATAGAAGCAC ACCCTTCAGGAGAAA  
TTACAG AATAATAC GAGT GTTCTAGCATCGCTACAACATCTCCTATAGCCATTC CTAGAGCGCTCCTGA  
ACATCC TTCACCAATCACAATTACAATGATTG GGGT AGCTAATCTAGCTAACT CAATAAG CAAA TCGCA  
ATAGCCAACTTGACCTC TTTCTTCGGCTGTTAATCC AGG GAAA GCTCCAGGGGT ATCAACGAGAAA GA  
TAATTTGGCAAACC GAA TTTCTCTGCCAT TTTA GCTAAGCGTAGAGCC TTTCTAAA GCCTTCGGGACAAG  
CATCC CGAAGTTACGATGCATACGAGAT CAAA TGTCGCAACCC TTTCTTGCCCTATAAGCAT GAAA CGC  
TGCCCTT GAATC CAAA CGAACCC TCCGACA ACTGCA GGATCATCTCGGAACGTTTCGATCTCCACAAAGTT  
CTACAA ACTCTTCGCAC ATTCCTTCGATATAATTC ACTGTTCTCGGTCTCGAAGGAT GTGCACAAA CAAA  
TACTCT TTTCCAAG GGGT GAGATCG GAA TAAA TTT TTTCTTTA ATCTATC TAAA CGCTTATCCAATT CA

AAAAATCTCTGAAGAA GAAAGCAGGCTGT TTTCTTTA TTTT TTTCTTTAAACTC GGCGATCGTTT TTTCGT  
ATTCGACAACCTGTT TTTCATGAGGAAGTAGTTCCACCGTAGCACGCTCCCTTCTTA TAAAAAAGAGTTA  
T TTTAATACAAACAATGATCAAAAAACAACCAAACTA CAAAATTATAATGACC CAAATTTACGC  
AAACAAT TTTAATTTCTCT TAAAAA GAAATCAAGCCT TTTCAAA TAAAATG TTTA TACTAT CAAA TGTGT  
AGGGAAGATTGATCAAAAAATTACTTCCCCAAAACCGATC CAAA CTTG TAAAGAAA AAATTTCCATATG  
CGGACTAGAAGA TAAAATCCGAACAGTCTCTT TTTC TCC TTTAATCAATACGTCATAGGCTGGGCC TTTA  
TAA GAGTCTGGAGATCC TGTACGCAAT CAAA GACCATTGCATACTTGACATTGCG ATCCCTTACAAAAGA  
TAGCAAAAACGCATCC TGTAT TTTC CCT ATCC AAAAGAAGAAGCAACATGACACT CAAA CTCAGTAATGTC  
TATACGATAACAT GAAT TAGTGC TAAA CAAAGCATCTTGCAAATAA GAAAAGCCTGTTCTCTGGAAGAA  
GGCTGTGACAAAGCTCCTGCAAAAAGATATTGATACTTCTTCGTCTT TTTC TTGACATGAGA ACTC TTTC A  
CTTGCCGCA TAAA CCAA ATCC CAAAC ATTCTCCT GGATCC CCAACGCAAGGACCATAGTTGAGA ACCCC  
CACATCTCCTATCAAAAAAGCCCC ACTCCGCTCTTACAACCACTACCCTAACATAAGCA GAAA AAGAA  
GGCGTTCTGCGC ATCC AAAAACCAAGAGACATATCTGTTAGCGTGAACCTGATCTTCTATACGGGCTTCTT  
CAAA GCAAATAACAA TTTACTAACAGCTGTTT TTTC CTGGTT GGAT CTAGAGCCTTCTTGACTC CACAA  
TGCAGG GAAAATG TTTC TCTCATGA GAAAATAATGCGTGT GAAA AGCTATCATT TCAAAA ACTTGCTCG  
TAGCTTGTGTCA TAAA ACTCTGCAATACGAGACAACAGCATAGCCATCTCAGCATGCTCCCCA GGAT AAG  
GAAGGCCCTCCCCA TAAA AAACCTGCTCGAC GAAA TAA TAAA GCCGCTCCAGACTGCGTCTGATGCATACA  
AAGGAAC TGGTATCC TAAGTCT ACCC CTTCTTCCAAGCTGCCAGCAAATAAGCGGCACGAGCGATATCA  
TGAATATGTAACAAT GGATGATGTA GAAAACGCTGTATAACGGTTCTTTCGAGCTTCTT ATCC TG GAAAG  
ACTC TATGAGACTC TTAC CAAA AATATCAAATTC C TCTCAGAGAACGCCTCTAATACGTCCTCTA ACC  
TAACTGCGATTCTACTAGCATAGTTAA TAAAAAGAGCTCCAATGGCAAAAATAATCTT GAG GAAATTTA  
GAGT CAAGCTTGCTTACGCTGAAGCTGACTC TACGATC GAAA GCAAAGCCGG GAAA AGGGAAGAAGACT  
AAGAAGAT CAAA TTGGTG TTTC AATCAAACG TTTC ATTCT CAAA CCAG GAGT GAAC TTCACAGCTCTTCT  
AGCAG GAATATGGAT AGGTACTGCTGCATT TTTAGGGTTACGACCAACT CAAA GC TTTC TCTCTACA  
TGTAGA ACTC CAAAGTCTC TAAA CTCTAATCTATCC CTTGAACTAGAGCATCTGTCATCTTATC TAAAA  
AAT CAAA GATAACAGTCTCACGTGGTTAGGATGTAT TTTATGATCTTGAGATATCGTACTGATTAG TT  
CTTCTTAGTCATCGTTGCCATGGTAGCTTGGTTGCCCTCCTAGT TAAA GTGGTA ACCC TTGCGTCCC TAAAT  
ACCGCAATATATGCGTATAATATGC ATT CATCC CAAA GATTC AAGACTTTT TTTA TCT TTTC CATGAACG  
CACAAAATCT ACCC AC GAGT TGC ACTCAACC GAAA CTTCTCCACTAC GAATATCC TTTC GAGCACT TAA  
AGGTCTTGT TAAA GCCCTCCCTCCCCAGATTAT TTTA TGCAC TTT CAAACTCCTGAGCTTACTGATACA  
GTCTTGTCAACTTGTGCG ATTC AAAA TAAA AGCATGTATGCCTTCTGCAATACC CAAA GCTAAGTGCAGC  
GATAACGAGCATC TAAA AGAGCGGCTCGCTC TTTA GAATTG GAAAGAAA CCGT TTTC CACAAGACCGC  
AGGCATGGTTG TTTC TC GAAT TACCGC GAAA TTACCTTC TTTC AC TTTACGTTGCG TAAA GCTCCATTT  
T CAAA CATAAA AGCCAAGATCGACTTACCTAAGCTCTCTGAT TTTC TAGTCTTAATATGTT TTTA TCAT  
TATAAAA AATAAAA TCTCAGTTCC TAAA GCAGATGTATTAGAC GAGT GATTACAGT GGAT ACTAACAAAAC  
ATCAGCCTT ATTC TGA CAAA CTATTGCAGCTCGCTTACTTAGATCGACATATAC ATCC GTAGCCCTTGT  
ATTATCGTCTTAT ACCC CATGCGACGCAAAC ATCC TTGCACGCT TAAA GCTATCGACAACGCCAAAGT TT  
TC TC CAAA TACCGTAATTC CTTATCTGCAGTTCCCTCGTC TTTA CCGCATGACCA GGAT CTATGACTAT  
AAGTTC ATTC CTACTTACCTTAG GAATCC CCGCAGCATCAGCAAAAACACTA ACTGGACTACT TAAA GTA  
AGCAGCAACAGCAATAATGTCAAATTAACAAAGGGCTGCCAAGGCTTCACACACAACCTCTCGATCATCA  
AAGACAATCGTCTGATG CAAA AAGATCTGAT ACCC CTCATGTCCC TTTC CCGCAACTAGTACAATATC TT  
TA TCTGAAGCCATTGATATTGC TTTC TCTATGGCTAGCTTCCATAC ACTC TCAACAACATAATGATCAGT  
TGAGAAA CC TTTA CATATATCAGCAATAATCTGGTCT GGAT CTTCTGTCCGAGGAT TATCTGAAGTCACA  
AAAGAAA AACCGTAATGCTCAGATAC CAAA GCCATAAGAGGACGCTTAACACGATCTCTATCTCCACCAC  
ACCC AAACACAATAATTAGCCGACCATA TTTA GGAAG GAGT TGTA TAAA ATTC TGCATACATTGTCCAA  
TGCATCTG GAGTATGGGCATAATCAATA TAAA CAGG GAATGGCCCCA TAAA ATC GGATCC AAACGTCC T  
TTA GGAGCTGATAA GAAA CGAACATCGCGTAC TAAA TCAGCAAAGTCTCCGCC TAAA AATTGATGGACAA  
CAGC TAAA GATGC TAAA ACATTATATACATTATGTTCTCCTATCAA GGATGTCTCACAAGG GAAA AC TTT  
CCCTGATACCAAATGTCATAAGAAG ATCC TGTAT GAAT ACAGCTTCAATCTATCTGCTCGATAATCAGCT  
TCTTGAT GGAT TGCATAGGAGACTGCTTGGCTGAGAACCAT TTTAAA AAGCTGGGCGCAT ACTC ACAAT  
CCAAATGACAACAGCTATACC TTTC TCTGGCAAGGAAGC GAAA AACTGCTT TTTA GCTGCAATATATTC  
TTCAAGAG ACCCAT GAAA ATC TAAA TGATCTGAAGTAATGTTAGT TAAA ACTC CAGCTAAGA ACTC TGT  
TCACGA ACTC GACCAAGAGCC ATCC CTATAGAAGATACTTCCATAACGGCTGCAGATAAGTTCTGCTTAA

CCATTTTCAGCAAATACTTCTGCAA TAAAATCGCATCAGGAGTGG TAAAAGCTATCAACAATCC TATTC TC  
ACC TAAAATGTGCTCTATGGTTCCAATAAGACCAGTTCTTATTC CTGAACGCTCCATAAGTTCTCTAACC  
AAACAGGAGACTGTTGTCTTCCATTAGTTCCGTAAATTCCTATTAC ATCCAGATGC CAAAAAGGAT TAT  
TATAAAACCTTGCTGCCAAAGAGGCTTCCAATGCTATA GGATCTTCTGCGATAATCTGAACAACCGA TAA  
AAAAAGGAT TGTATAGAGAAGAGAGA ACTGCAATCGCTCCATTC GCAACAGCCTGAGAA GAATAGTCATTG  
CCATTGCAAAACTGCCCTTGTGCGAGCGAT GAAAATATCACCAACTC CAACACAACGA GAATCTC GAGTCA  
AA TTTCTAACAGGAATAGACTCGAC TTTCCCA TAAATTTTAGCCG GAATATTC CGAAGAAGTTGGTC TAA  
ATGCATACCAGATCCCTAAGACACGCACACAAGGGCTTCAAAAAGCGTTCTCAAATAG TTTA CTATACAC  
ATATTCGTTGTCAAGC CAAATCGACTAACTACGTCTGTGTCAGA GAAAAGAGCAAAGACAAGAGA ACTCG  
TCTT TTTACTCTTTTCAAAAAAAGTA ACTCTTATATGGAGCAAA GAAATGT CAAACAAATGAGATATAA  
TTATGAAATGCTCT TTTCTTTA TTATTAG TTTCTCTCCCGCTTTCTTATGCCAGGCTGCACACTCAT  
CCCAAAGCAACAGACCTCAACAC ATTCACTCATATC TAAATAAACTC ACTA CAAA CGATTC CATTCTCA  
TATAGCAGC TTTAATTGA GAAA CTTC TTCACGATAGGTGTGTAGTTGCTCGTCTAATGGCACACC TAAAT  
AAGGCAGC ACTCGAGAAGCTATTC TC GAAAATACAGGAGCAGCACACCGTCCCTCCATATAGTTCTTAGT  
TCTGTCTTCTCTT ACTCCATAAGCAGGATCGTCGATA GAAA CAA GAATAAC TAAA GAAACTGCAGTATCC  
GATAAA GCAGCTATAG GAGTAAGCCCGA TAAATGAAGCAATGTGCCGTTTTTTATCATACTTCCCATCGA  
CTAATTT TTTCTGTTGTCCCTGT TTTCTCTGCACTA GAATATCC CTTAGTAGCAGCAC GAATCC CCGTCCC  
TCC TAAA CATGTTGT GAAA CGCATAGCACGAACAACATCTGCAACTATTT TTTCA GAAAGA ACTCGAATT  
TTCCAAAGGCAAAA AAGACAGTATTT TTTCTTCTCCTGAAGGA GAAA CAATC TTTCTAACCAAGGTTGGAC  
GTATCAAAAACCC TCCATTACCAAAA ACTGCATAAGCTTGAACCATCTGCATGCTTGTAGCCAGCAAATT  
GTATCC CATTGCCAAA GAATAAGGTGTGATAAAA GACCATTC GGGAG ATCC GTT TTTATG GAAA CGT TTT  
CGTGAAGGAACCAATCC TACAGCTTCTGCCGGCAATTC AATTC CAGTTCTT TTTCTAAAACCAAATCTT  
GCAAACGCTGTTTACATACCAATCAGCACCTAACT CAAA TACTATACGATCTGCAAGTTGAGCCATATACAC  
ATTGGATGACT CAAAAATCGCCATGTACATA TTTAAGTATCGATTACTGACAATGTCT TTTAGAGGCATT  
TCAAA CCGTCTTG GAAA TACTCGTCTACTAACATCTAACGGTTCATAAGGAT CAAAAAGAT TTTCTCCAG  
CACGTT CAAACATCTCTTCA CAAA CTAAATAAGGCAATAGCAACAGTTAT GGGTTTCTATAATAGAGCCCG  
CTCAAACACATCGCTAACAGCCTTAACT CAAA TATCTTCTATGCGATCATTGCAGTTGAAGTATTC CCTA  
TACTCTCTC GGAT TAAA AAAGGGATATTGCGC TAAA GCTAAGATCTCTCCTGTATGT GAATTCAGTACAA  
TAGCTCGCCACTACGAGC TTTAGCTTCTAACACGCCTAGGGCTATCTCTTGTCTGCAATCGTCTGTAC  
ATTGGCATCTATTGTTAGATAAA TGTGCGTCCC ATCCCTAG GGAT TTTAGTCACTTATCAACGTC TAAA  
CGG TTTAAA GGAGAACGCAACAACCTGCGTCTCCAT TTTCCCTTCTAACAAACGAT TAAAATAAGCCT  
CTAAA CCTCCTGTAGG GAATGCTTCTCCTGATT TTTCTATCT TTTA TCTCCCGAAGGGTATGCAAAACCTG  
TCCTAACAA TTTCCGAATGGATAAGAACGTTGATAATCACTAA TAAA GAATAAGGCA CAAAACGGAATT  
TTATG TTTA ACTGCGTAAGG TTTCCACCAACT TAAA ATCCGATCAC GAATA GAAA CATCTAGAGAAA CGT  
ACAG CAAA CGATAACGCGATT TTTCTATCAAATTC ACTAC GGATACTC TGATAGTCCCCTTCGCCAACCAT  
AACAAACACCATAACGAGCAATCTCATCGCGAT ACTCTTCCGGAATAACGACAGCATCTAAGCA TAAATGA  
AATTTA GTGATATCAATAGCTAAC GGGT GAAA TTGCTCTT TTTCCGCC TTTA CGCAGACTGGTATTAGCAA  
AAAAGGTTCCCTC CAAAAAAGGATCT TTTAACGC GAAA CTCGTGTTG ATTCGCCGCCCTCCACAGCCCACCG  
CTCTCCATCACAAA CAAAAAT CAAA TAATAACGAACTATTAAGAGCGCGTATAGAGACAAAACCC CAACA  
ACGATCAGAGTTAATTGTCTACGGTG ATTCATAAGC TAAAACACTGAT TTTCTCTTCGCTAAGAT ACTCT  
AGATACTGGTATTC TGGAA GAAA AGCTATCTGCAACAAATGTTTCAGGGC TTTCTAA TTTCTCTAG TAAA  
AACTAAGCGCAACAT TTTCTTGTCTATCTGACGCAATTGAGCCA TAAACAAG GGATTTCCAAACGAAG  
T CAAA TAAGATC ATTC TG TTTA TCTATATACCGA TAAA GAGCGCAACACAAAAGACT TAAA CAGACAAGT  
AGTCGC GAAAACCGATACCTATTC ATTA CTTATCTTCAAAACTC TTTCAAAAACGCAACTTAGCTGA  
ACGTGATCGAGGATTCATCC TGG TTTCTTTCATAAGAGGGCATTATCACTTT TTTA GTCAATATCTTACCA  
AGCCCCCTAGCCTCAGCTTCTC TAAA AGCCCACTTAACAGGACGATCATC TAAA CTACAAAAA GAAA TAA  
CAGC TAAA CGCCCACCAGGACGTAACCAACG GAAA GCA GAGTCTAACAAA ACTTTTAATTGAGCCCCTTC  
CTGATTAACATAAAA TGCAGAGCTTG GAATATCAATGTTAGT GGATGAAT TTTCTTTCCGAATCGATAG  
GAAG GAAA GACTC CAGACGTAGCATCT TTTAGATC TTTAACGGTCAAATCTT TTTCTTTTCTTAAAAT  
GCACTACAGCTGCCGAGC ACTCTCCAAGAGGCTCTTCTCCGTAGTTAC GAAAAA TTTCTCCAATCTC  
TTCTTCCCT TAAA GAAT TAAGCACTTCACTTGCAGTCA ATTCCTCGAGAAGTATCCATTCGCATATCCAAA  
GGATGATCTTCTCTT GAAAAC TAAA TCCACGTTCAAGGTTG TTTA ACTGCATAGAGGATACTCCTAGAT  
CAGCAAGC ACTC CATCATACGTCCATCAGAAGTCAGTGTATCC ACTTCTTCAAAAAGAGCATGTGCGAA



GCGCACGCGATCC TAAAAGGAAGTAATCTATTTTCGGATAACGCCAGCGCAGACAGATCTCTATCCGAC  
CCGTACATACCGCTCTATCGAAGGAAATTCGGTTAAA AAAGCTTCTGCATGACCACCTGCACCAACAGTCA  
CATCACAAAAGACTACTGGATTACGACCGCGAATAATGAAAGACTCTCTTTTTC TAAAACAGGAATATG  
AGGAATGAATCGGTCACGGGGAACCTTCTGCA TAAAAGTTATTATCCATCCACTACTACAATAAGCCGC  
TTAGCTGC GAAA GTACAGCTTTCAAAAAATTCCTTGTAGC TAAA GCAGAAGGTTGCAGTGTATCGCATG  
TTTTA GT TAAAAGCACAGCTCTTCAATACACCTCAAACAGCAACTTATTACATCTAATACCT TAAA AACCC  
AAAC TTTA CGTTCTCCCCTCTACCATACTTGACTT TTTCCCTCCCCCGATTATGATTGAGATTATGAGCC  
TCTCAAGG GAAA CTTATGGTC GAAA TT TTTA ACTATAGTACCTCGGTATACGA GAAA CACAGCTCTACGA  
ACAAGCTTGTTAATGACTTCCG TAAAAGAA TCCAAATGGAAGGCGCAGCGATTC GGGACATAGCTAAGCA  
TGCTCAAATCTTAGATATGAC ACCAAGCCTTCTGCGTTATCAACGCTCATGCAAACAAA TAAA AAAACT  
TGCTGGGCGTCT TTTCTCCTCCAACCAAT TTTCA TAAA CAACGATTC TCCACTCCTTACTTAGTACCAT  
CTCTCGGCTCTCTGATAAA CAAGACCAAGACATG GAAA AAATCTCTTCCAT TTTAAA AGTTCTAACTAG  
AGG TAAA TTTT TACCCTCAACAGCTGACACGCTTTTCAC GAAA AAA TAAA CGTCTCTGATCAAAG  
AGAAA TGGACAACAT CAAA AGCAGGAAGAGCTTGAAGCAGAAGAGGAAGTTT TGTACGAGAAGGCACAG  
TATTGCTTAGAGCATT GGATCAAG GAATCAAGAGT TCTAATCTCCTTATCGATTATGTTATTTTC TCGTAT  
TTTTCAATTCGTACAAGGTTAAGCGTATATGTTAGATAATGAGT G GAAA GCAAT TTTAGGATGGGGAGAC  
GAAGA ACTCGAAGAGCTCCGCA TTTCTGGATATTC GTTCTTCGTCAAGGGCATTATCAGAAA GCTATTC  
TTTTT CAAA AAGCTCTCGTTATCTTAGACCTCTAAGTGTATATGA TTTTCAAACACTAGGAGGACTCTA  
CAAA CAGATTAGC GAAA ATACCAAAGCTCT TTTA TGTCTT GGAT CAAGC TTTA CGTATGCAAGGAGATCAC  
CTCCCT ACCCTGCTCAA TAAAAC TAAA GCTCTATTCTGTCTCGGACGCATAGAAGAAGCATCAGCGATAG  
CTTCTACTTAAAGCTCGTGTCCAGATCC TATCATTGCAGACGATGCCAAGCATTACTACTTAGTTATGT  
AAA ACCCCCTTGGTGTGTTGATAATGCATTTTCATCC TGGGAGAAGCAAAAAGTCTCTTCTTGAGA  
GATTCCTTCTATTATT GAGTATTAATAAT CAAATTTCTGATTTTCAG GAAA AATGATAGAAA AACTTC  
TTGTCTTAAAGCGTATT CAAA AAC GAAA TGTATTGATTGCTTATCAATAGCAATGCTACA CAAA CGGTTT  
TC TCCAGGAGGAGGGTGCATTACC GAATCCTTAATTCCTCAAGCGA TAAA GAGAACGCGATGTTAACTTG  
CAATGATTGCAGCACGTGGGAGCAGTTCGTTAATTATAT TAAA ACCCGCTGCTC TAAA ACAGCC CAAAA  
AACTGGAT TGCTCCT ATCCAAGTACTAGAAGAAT CTAGC GAAA AAATTCGATTAGAAA TTC CCAACATAC  
AAA TTCAAAGTTACCTCTTGGACAAC TA TAAA AAAGATC CAAA CTCC CAAATGCCTCTCGATGCCAAG  
AAATCC TGCCTTAGAATTC GTTGTGTCAGAGATCAAACGCTCTTCTCC TTTA GTA ACTCCGCTCTATCGCT  
AAGCCTGCTACAGAAG TTTCTGAAGAGAATAAA GAT TTTTCAGCTTAAGCTTAATGGAGCTTATCG TTTTCG  
ATAA TTTCAATTGAAGGTCC ATCCAACCAACAAATAAA ATCGGCAGCTCTAG GAAT TGCTGCTCGTCCAGG  
AAGATCGTATAATCC TCTATTTA TTCATGGTGGAGT CGGATTAGGTAAGACGCA CAAA CTTCATGCTGTA  
GGACATTATGTTTCGGAACATCA TAAA AATCTCCGATACACTGTATTACAACCGAAGCTTTTA TTAATG  
ACTTGGTTCATCA TTTA CGTG TAAA ATCTATCGA TAAA ATGAAA AACT TTTA TCGATCGTTAGAT TTTACT  
TCTCGTCGACGAT ATCCAGTT CAAA CAAAACCGCCAAAAT CAAA AAGAG GAATTC TGCAACACCTTC GAA  
ACTC TGATCC ACTTGTCCAACAGATTGTTGTAAGTGTGACAAGCCTCCAGGACA ACT TAAA TTATCAG  
AAC GGAT CATTGCTA GAATGGAGT GGGGCTTGTGCTCACGTTG GAGTTCCTGATTTAGAAA CTCGAGT  
TGCTAT TTTACAGCA TAAA GCTGAACAAAA GGAT TAAA ATTC CTAAT GAAA TGGCTT TTTA TATAGCA  
GATCATG TTTACG GAAA TGTCCGTCAACTTGA GGGT GCAATTA TAAA CTCACAGCATACTGTCTCTTAT  
TTA ATAAGCCTCTAACAGAAA CAACTGTCCGAGATAC TTTAAA AGAGCT TTTTCGCGCACCTTC TAAA CA  
AAAAG TTTCTGTC GAAA GTAT TTTAAA GAGCGTTGCTACAGTA TTTCAGG TAAA AATTCAGGACCT TAAA  
GGGTCTTCCAGAGC TAAA AATGTTCC CAAAGCTCGACAAGTTGCCATGTATTTA GCAAAA ACTC TAATTA  
CAGATTC TCTTGTGCAATCGGTGCTGCT CAAA GAAA ACTCACTC AACAGTTC TTTA TGGGTGCAAGAC  
AATTGAACA GAAA ATA GAAA AAGACGCTCTGCTAAA AAATCAGATTAGCTTATGCAA GAATAATATAGCG  
ATAGACTC ACCACAACAC CAAA TGTAGTCTT GAAA AGC TTTCA TTAT TTTACAGAGACCGTCTTATGTGG  
GGAGAG GAATGTTCAAAGACCTGCAAAAAA TTTCCAAA ATGAAGTCCAAACTC TGTATGAGGAT AGTGG  
CGCCAACTCCAC GAGT TACAGTATAT ATCCCAAAGAACAGAACG TTTAGAAA ATC ATTC AAATATT CAA  
AAACCAGCTAAGCCCGCG GAAA CACGATTGCTATCTCAAGAAGAAC ATTCCTCAATGGACTGATCAACAAG  
AAGGACTC GCAACTC AA GAAA GCTCCTTCCC GGAAGAACCT GAAA CCAC TTTA GGTGAGGGAGT CTC TTT  
CAAAGGAGAAT TAACT CAAA AGAGACTC CTTCGTATTGACGGGACGTTCGAAGGT ATTC TTTGCTC TAAA  
GGAAA GATTATTGTTGGCCCTCAA GGAT ATGTCAAAGCCAATATAGA ACTTGAAGAAGCTGTGATAGCAG  
GAGT CGTTGAAGGCAATATTACAGTAACTGGAA GAGT ATCTCTTCAAGGAAGAGCTATGGTTACAGGAGA  
TATTC AAGCAGGAAGTCTATGTGT GGAT GAGGGT GTACGCCTGTGTGGTTATGTCTCT ATTC AAGGAGCC

CCCTCTAATGAGCAAGAGGAAA TAGACTCATAAAA AATCGCGTTGTCGGGTACTTGGC TAAAAA TTTC TTC  
GCGC ACTC TTCTAT TAAA AGGAT AAGTAGAAA GAAT GCATATGT TTTC TGCT GAGTC TAAAGCT TTTC TT  
TTTC CTATACCAAGATCTCT TTTC GCAAGGAAC TTTC AAATATCTTGCTATAG ACTC CACAATG TTTC TCT  
CTATGTCT CAAAAA GAAA AGATA ATCC GATCAATTGAGCACTGA TTTA GTATTAGAGCTCTCAAAGCAGC  
TTTC GAGAAACTC TGCTCTCCACTTCT ATTCC TAAA CATGCGCAACGATA TAAA GCTAATGTCTCAGGC  
ATAAGCTCATACAAAATA TAAA GAGAGATGCGGAGATAAGGCTGAACAAGTAGAACAGATCGCC GAAA TCT  
CCCCAT ATTCAACG TTTC TAAA CACCTAGTACAACGATTATCG TAAA TACG TTTA CTACATCGCCGCCA  
ACAAGATAGACAAATCTCTCTTCTGGAGC TTTA CAAATGCAGCAAAGGACTG GAAA TACAAA TC GAATA  
ACAAATATTAGAATCC TA TAAA CAACC GAGTTT TTTA TTTC TAAA AAT TTTAATAA CAAATTACGT CAAA  
AACGTGTAACGTTCTCAACC TTTC TCTCAGACACAATGCTC GAAA AACTTGTCG ATTCC CCAAAGAAAAC  
AAA TCG TAAAAGCAA TTTC AACACATGACGCTATCGCAGATGCTGTTGATACTT CAAA CTTCGAGCCT  
CTACAC ACCCATCTTCTCCACCGTTCGTTAGAGATGCTGTTGACGTCAAGCGTT GGATGATGTTGGTTG  
TAATTGCGCTCATGCCAACGATC CAAA CAGCCGTCTG GAATTCGGGT CTACAAGCTCTGGTCTATCAATC  
CTCTAATCCAC GAAT CATGGAGGC ATTCTTACACATATCTGGATTTAAGAGCTATT TTTCATTCCG TTTC A  
CAAGAGATCGGTATA GGATCCGTCCTT CAAA CTGGAT GCAAAAATT TTTC TCCCTCTCCTTTCATTAGCT  
ATGCTGTAGGAGGAAC TTGCGAAGTTCTT CAAA CTATT ATTCTGTAAGCA TAAA ATAGCAGAAGGACTGTT  
AGTAACAGGAAT GC TTACCCGCTAATCC TTCTCCTACTATTCTTATTGGATGGCTGCCCTTGGCATT  
GCT CAAA GAGTAGTTATGGGGAAA GAAC TT CAAA GCGGCACAG GAATGAATATTC TCAACCCAGCCTTAA  
CAGGACGAGCT TTTC TATTCTTTA CATTCCCTGC TAAA ATGAGTGGAGACG CAAA GGTGGCAGTAACCC  
TAGCA GAAT TAAAGAAA GCCTTGCAACGATGAGCTC CAAA GCAGAGAAGAGCCA TTTC GATGGAT TTTC T  
CAATCCACTTGT TTTA CAAATTC GAATTCGACTC CTCCATCC GTCAAACGTGTTACATCGATGCCATAG  
CCTCTAATATCT TAAA TCTTGAACATGTTCT ACCC AAGATGTTCTCCAGACTCAA CAAA CACATGGGC  
AGAATCTT ATCCAGG TTTAACAGTAGATCAAC TTTC CTAGAACAAC TTCAAAT CAAA TAACTACTCCA  
ATAACCGAAGGAGG TTAGGGCTTCTTCTGCACAC CAAA ATTCTGCCTGTTCCCTTACTGAGGCTG TT  
ATGGTATCG GAAA AT TTTC TACAG GAAACCTATTCCAAAGAAA TATTC TAGGATC CAAA GGAGAGACTTC  
AACTGTAGCGTGCTTACTAGGTGCGGGCTTCT CAAA TTAACAG GAATCGCTTCTTGGCGAACTATGCTA  
TCT CAAA GTCTAAGTGCTTTT TTCCAAA CATGGTTC TTAAAAATCATGAGCATCTTAACAACCGG GAATG  
CTGGTGCTTGGGCTCCTGCAAAGTTC TTATTCTGCCTATCGCCATC CAAA TATTGGAGGCTTAGCATT  
CGGGCTAGTATTTA TGCTACCGATCCAG TTTC TTCCCTGCAATGAAGCTTGCAAATGGCTGTATGGC  
GCT TTTA TAGGAT TTTC TAACAATTC TCATACG TTTA ATCAATCC TGCAT ACCC TGAAG GAGTTATGTTAG  
CCATCC TATTAGGGAACGTG CAAA CTCCATTACAAA ATAACATTGCTCTTAAGCAATACAGACAACGGAG  
AATA TAAA ATATGGC ATCC AAGTCTCGCCATTATCTTAATCAGCCTTGGTACATTATCTTATTCATC CAA  
ATTCTTAG TTTA ATTGCTGGG ACCC TCCTGTCTTCTGTATTATGTCCTTGCACCT ATCC AACAGCAAG  
CTGCG GAATTC GATCGCAATCAACAAATGCTAATGGCTGCACAAGTAA TTTC TCCGATAACAC ATTCC A  
AGTCTAT GAAA AGGAGATTGGC ATCC AGCCCTATATAATAC TAAA AAGCAGTTGCTAGAGATCTCCTCT  
ACTC CTCC TAAA GTAACCGTGACAAC TTTAAGCTCATAT TTTC AAAAC CAAA TTAGAGTCTTGCTTACAG  
ATACACAAG GAAA TC TTTC TTC ATTCC GAAGACCATAATCTCAATCTAGAAGAAT TTATCTCAACCAAC  
TC CTGTAATACATGGTCTTGCCC TTATGTGGTCTACGCT ATCC TACACAACGATGCAGCTTCTCT TAAA  
TTATCTGCTTCCCAAGTAGCAAAAAATCCAACAGCTATAGAAT CTATAGTTCTTCTATAGAAGGT CAAA  
G CAAA TGGGGACCTATCTATGGATTC CTGCTCTA GAAA AAGACGG GAATACTGTTCTTGGTACTTCTTG  
GTATCAACATGGCGAG ACTC CTGGAT TAGGAGCAAATATCGCTAACCC TCAATGGCAAAAAA TTTC AGA  
GGCAAAAAGTA TTTC TAGTCTCAGTCTTGGG GAAA CAGAT CAAA CTAAGACAACCC TAGGACTGGAAG  
TTA TAAA AGGAT CTGTATCTGCAGCATTAGGAG ACTC ACC TAAA GCTGCTTCTTCCATCGACG GAATTC  
AGGAGCTAC CAAA ACTTGTAATGGTGTTACC GAATCC TTCTCTC ATTCTCTAGCTCCCTACCGCGC CAAA  
TTGAC TTTC TTCGCAACTC TAAA CCTAGTGAGAGT CTCATGACCACTAA TAAA TCC TACTTAACCTAT  
TTTA CAGATGCGTTGT GGATCAACAATCAACC CAAA ATCGCTATCTTAGGTATCTGCTCAGCTCTTGGC  
TTACGACTACGGTGACTACAGCTCTAACTATG GGATTC GCGGTTAGC CAAA TCACTGGCTGCTCCTCT CA  
AATTG TTTC CAAA CTAG GAAA ATTACTCCC GAAA GTGTTCCGGAT GATCGCTCAGCTAATTATCATTAGC  
CTA CAAA TGATCTTAATTGACCAGTT CAAAAA GCTTT TTTC TTACTA TTTC GAAA ACCCTCTCCGTT C  
AAA TTGGATTAATCATTACTAAGTGCATTGTGATGGGGCAGCA GAAA GTATGGCTAGACACG TTTC ACC  
TATTCCAGCGTT TTTAGAT GGAT TAGGATCTGGCCTCGGCTAT GGGTGGGTACTTG CAAA CATTAGTATC  
ATTAGAGAGCTA CAAA GCTTCGGAAC TATTCTAGGA TTTC GTGTCATTCTCT GAAA TTC TATACGCTTCAG  
CAGCAC ACCCTGAT GGATAC GAAA ACCTAGGTCTGATGGT TTTA GCTCC ATCC GCATT TTTC CT TTAGG

AATCATGACAAAGATCGTAAACATTATTAGAGCTCCAAGACAAAGAGGTAGCGTTTATGTGGTTGGGAG  
ACTATTCCTTATTAATCTCTTAGGGATCTTTTACAAGCCACGTTTATTCAGAATATCAAACTGTCCAC  
ATTTTAGGAATGTGTAGCTACAAAGCCTGTTTCATCTCGCTTGTCAACAGCCAACGGCTTGGGGATGTCT  
GTGGCTCTCGTGCTTACAATTACAGGAAGCATTAACTGGTTGGTACATTATTTATCACAACCGGGCG  
CCTTGGCTTGGTTATCACCTGCATTAGCAAATATTGATCTCAGCTTCCTAGAATTAATCATGTTTATTGT  
TGTTATCGCAGCATTACACAAATTTAGAAGCTGCTCCTCGAAAATTTTCAGAAAACCTTTAAGTAGCC  
AAAGGAATATTTCTTCCCCTTATTGCAGTAACTGCGCTATCCTAGGTGAGTATTAAGAAATACTC  
GAAACTATCCTTTTCGCTATGGTGGTATTCCTTGGGCTCAGGATGTGGCTGGTGGCTTGCATCGT  
TCTTCAACAACCTATTAGAGAAATTAGCTTACTCGATGTTCTCAACACTTACGAGGGACAGGGATT  
TCCTTATTACGACAGGACTGATGGCTATGGCTTTATGGGATTAACAGGAATTGATATTTCCAAACCA  
CAACATCTAAACCTGCAAAATCATGAATATAGCCACTGATAGCCACAACCAAAATACACATTCAGCTC  
AGAAGAACCCAAGGCTTCAATAAATGGCGGTTAATAGCCGCCAAAATAAGGGTTCATAAGAAAGC  
CTGCGGAAATCTTCGGTGGTGTAGAACCAAAACATCTTCTGATTCTGTGGCATTATTAACAGGAA  
GAATATCATCTTCAAGAGCTGTGTGACCTCTAACACTTCTCCAGAAACAGGAGAAAGCACCTCAATAGC  
TGACCAAAAGATTCATAAATACAAAGCTTCCCCTTTTAAATAAAGAACCTACAGAAGGTAGATCT  
ATGTGCAAGATATTCCTAAATGCTCCCGCAAAAAGACGATAAAACCAAGTTTACTATTGAGAAATGAA  
TCGGTCTATCCATACATGATAGTCAAAATAACTCAAACTTTCATATTAGTCTACTCAATCTTT  
AATAAGGGTTGTGAAAATAAATCTTCCAAATAAGGGTCTTAAATAATTCCTCATTCAAGTGACTTTAGC  
AAATAATAGCTTATCTAGGCTTACTGGATAATCACAACAAGACTTGGAAATAGCAGTGTAAATAGAAAGG  
CCTTTATCCAAATCGAATAACACATCGGATACTTGACCTTCTTTAAGGCAACATATCTTGAACCTT  
GAGGGCCCCCTGATCACCTCTAGAAACGCTTTCATGGTTTTCTTAGTCCCCCAAAAGATCTCCCTG  
CGCTAATTTTCCTGCAAGAAAGCAAAACAATCTAACAAAAGTCTCTGATAAATTCGGCCCTGA  
CTCAAAGAAAGATTTTGCAGATGCGTCAAACACGACTAATGCGCTCTTCTGCCAAATATTTCTCTA  
ATAGAACTTTCTTTAGCCCAAAACGAAAACCTTTTATACGGCAAAACCTCATCTTATCTGCGGACT  
GATTACACTAATGGAATAGAAATGTTTATTATCTTGGATATAGCTATCTACAGAATCTTGTGCTGATCAGC  
ACATTAGCTAAACGAACACCGTTCTGAATACCTGGTAACACATGATCCTTACCTATAGACAAGAAAGTT  
CTTCTCTTGGCGCTCTTTCTTAGCTAATTCAGATTGAATCCGCTCTGGATCTGCACGAAGAATGCTTT  
TCTTACATAGGAATGGCTTTCTCTACGATAGTAGGTTTCAAATTTAAGATATCACGCAAGAAGAGCTT  
GTTCTAATTCGGGAATTCATAAATTTCTTCAAATTTTCAGGATCAAAATACCACTGGTAGACTT  
GCGCCATCGGCACATATTTCTAGATCCGCTAGTTTACGCTCTGATAAGAAACAGCGAAACGTTTTCC  
AACCAGACACTCGGCTTACTTCTGTAACCTTTCTATTGGGAAGGCTCAAATAGGGACATCTAAACATGG  
ACAGAAGGAAAAGCTGTAAATGAAGGTAGGTCTCAAAGCTTCTAAATCTTCAAACTCTTGAACATA  
AACTATCCGGTAAATGGAATAACTCACAGATACCGAATCTTTCATGGAGAAGAAGCTTCTGCAAAGG  
ATAGTAATCGAAACTCACAGCCCCCTCCAGAGATAAAAGAGCTTTTATATAACAAAAATTCGATAC  
ATACCGAATAATCAGACTTCTACCCCAATAAAAGCATAAAAGAGGCCACTAAGTCTCGAATGTTA  
AATTAATCTCAGCATGTTACTAAGTCTGGCAAATGCATGCTGCGCTTATCAATAAATCTTGGCGAGC  
TTCTTTAAAGAAGGCATCCCAACCTTCTTTCAATCATATAAAACATAACATTGCCTCTGTAACA  
GAAAGAAATGTAATATCCCAAAACCAATCTTTCACATTTTATATCCGAATAGACGTAAATCAGGACCTT  
GAACCAAGAATGTGCGACTGGAAGATTGAACATCTGACGACGATATCCAGCAAAATCTAAGAACGTA  
GTGAGGGAATTTTTTTCTTCTAAGAACAGCCTTACTCGAACAGCAAACCTTCTGGAGAGACTGGATCA  
GTCAATGCTGGAATATATGGAAAGCCTCTCGTAATGAGGCGCGGAAGATTTCAAACCTTCTTGAAG  
AAATAAAAGGAGCATCGAATCGCCGATACCTTCGTAACCTCTCTTTATCAAAGCTGGAAATCCAGA  
CTTGTATATACTCAGGAAGAGCTTTCCCTAACTTATTGTTAAGAAACGCTCGGTTAACAAACCTTCA  
TTAAGAAATTCCTCCTCCTAGGATTCCTGTAAAGGATAGGCTTCATTGGATAAAATGTTTCAAAA  
GAAGGAATCTTTTCAGAATATTTCTACCCGAAGGAGTCTATAGACTGTTTACCAGATCCTAACAA  
ACAAATTTCTTAAACGGCAAAACCAACGCCTACGCCAACTCAGATAAAACAAACGCCAGCGATAACTAGT  
CCGATAAACTTCTCAAAATGCTTGTAAAAAATGCTAACAAGAGACCTTCTTTCAAAAGAACAATCTT  
TTAAGAAAATAAAGGAAACTACTTCTACAGAATTCCTTTACGAAGAGAAGAAAGATCCCTCTAGAATA  
TCTCATGGTACTTGTGCGTAAGATTATTATCAAGTTTTCATGGACAAAGACCTAAGGGAGGATCTGTAC  
AGATCCCTCCCTCCCTATTAGAAAGGTTAAGATGGCATGTATCTCTGTTCTAAGTACCTAAACAATAATG  
TACAGGATCAAAATACCAGTTTAATATGTCATCATGAGTCACTGAFTTAGAAAAGTCGCAAATCTTTTCA  
AATACTACCTGAGCTTAGAAAACCGTCTCTCAAAATCAATCACCACAATGCATTCGTAATCGCAATCGT  
TACTCTTCTTTCCAAATTTGAACTGCCTATAACAAAATATGATCATCTACAAGCATGCACTTTTATG

CAGTTGTGTATTAGCTACATAAAACTC GCTCACA TAAACTTTCATAGAGGCTCGACTGGGA GAATACAAA  
AAGCGTCCCACAAAAGCGGCCGAGAACC GAAA GTCAATGG GAAA TAATTAATTC GA TTTC CCCAAGCAT  
AGCTTCTAGTGA TTTC GGG ACTC CGATCC GTTCTCCATTGGTTAC TAAATAGA TTTC TACGCCCTCTATC  
CCAGCAAGCAGCCATGAGACTATCATATAT TTTC GCTACCG GAA TAAA AAACATCTGCGCTATCCGGATA  
GAAT GTTGAGCTTGGTTAATCAGCCGAACAT ATTC TTCAGCAATCGTGTGTGTTGCG ATTCATCC GGTCCGG  
AAAAGA TAAAATGCAT TTATC TAAA GGTACAGATACAGCACAAAGGCTCGTCTCAATCATAGCACAGAA  
AGAGGATCTAGCTT TTTC TATAGAAA GATTGATT GGAT CAATGCCTC TAAAATCATCTAATTT CAAATTT  
AACCATAGTT CAAA AGT GAAATCC TTCCACAAAGCATAGTGAGCACAAAATTC TTTC TCAGCAATGCTC  
CAT ATTC TTCCGAGACAATCGTTACATCTTGATCTCGCATAGCTGAAGGCCGAAGC ACTC CTCTATCAC  
AGCACGAGGGGAAT CAGAGACTTC TAAATCC ACATCC CC TTTA GAACATTGAAGATCC TCTAAAACAAA  
CCTCCGA TAAA AATGTACTTCCCATCAACAATGGACAACCTTAGTATGCG ACTC TGTCACGTTAGG GAAAA  
ATACATTACAATACGGCGGCCAATCT GAAAACAGGTA GAAA AACCTGTCAGGAT AAT TTTC TTGCA GAGT  
T TTAAATTC TTCCGATCATTATCATCAATACATGTAGGTTGGACCAATATGTAGCTTACAAGCGCAGGC  
ACTTCTTCCATACGCTGCTCCAAGCGCTGAAGAACTGT GGATAAAA ATCTCTCTCTCG TAAA CAAGGAC  
ACAATTC TACAGTATA TTTAGCACTACTAATAGCGGCCAACAGGTGTTTCGTACA TTTC ATAGCCGTTATC  
ATGAATAAGAACCCTTAGCTTT CAAA TCTCCATCC GGAATAGCTATAGTGTGCGCAAACCATTCAACGAG  
ACAACACAAGCTACAAATACAAATAT TTTC CGTAAA AAAGCCAT TTTCATCC TTAT TAAATCC CTCTCTG  
CATAAA GATCC GCATCAAAGAGTCT TTTAACCTCT TTTC TAACTTCT TTTAATACTGTTGAGGATGCTTCC  
ATCCCTAATGGGAAA AAAGCACTCTTCTCTACCTCAGGTCCGATCTT ATCC ACAAGGTCTGGAAGCAAAA  
TATTTTC GATAGAAA TCAAGAGAAT TACCAGATAGAAA GATAGAGCCCTGATGCAAAAAGCCTTG TTTCAC  
AGACC CAAAAGCCGCTCTCTACT TTTC TATTTTC CTATAAGAACGTCGTAT TTTA GAAGTT CAAA CCACA  
CAAAAATTAGAAG ACTC TGCTCGATCAGTAGATACTTCAAT GGGT GATAACGAACCTTCCAATCC AAATA  
ATTTA TTGATTGCTTTCAGAACAAAACGATTGACCGTATGATAGTTCGCCAGGATAGAGTCTTGATATAA  
GGGATGTTCTGAAGACACCAAAAGCGAGAACCGTAATCACTATTAT GAAA TGTAACACCACCACCTGTC  
GGACGACTTGCAGCGCTT ACTC TAAA GATTC CCAGTTAGCC TTTAAGAATCTCTCAGGCTTAATAAAGC  
ATCCATAAGTCAAAGG GAAAATCC CTCCCACTCATACAAATGAAGAATGACTTCTCC TTTC TAAAAGA  
GTCTAGAAGCAAACG ATCC TCAA CATGAGATCT TTAGGAGTTCCTCTAATAGAAT CAATGACACGCGTT  
CTCATTATTC AAT TAAA TATCTATAACC ATTC TAAATAAACAGACAGAGAACAACCTTCTCCG TTATTTTC  
ACGGAAA CATATTACATCAGAACAGTGATCTAAT TAAA ATAAA TAATGCCTGACTC TAAAAAGCTTCT TAA  
AAATTC AAAAAAGTCTGCTATAAAA AAGTGC TTTAATCTCCCAATTC TTTC CTTTACGAAAAGTTGCA  
TCATTATCATAAA TGTCGTATATGCTT GAAA AATATTC CACCTTGCC ATTCAGGTT TTATGCAA AGAA  
G TTTA CCAATCGCGCAAAGCAAGTGATTAAGTTGGC GAAAAAAGAGGCTCAACG ACTC AATCACAAC TAT  
CTAGGAACCGAGCACATCTTGTTA GGAT TAC TAAA ATTAGCCA GGGTGTGGCTGTTAATGTATTACGCA  
CTC TTGGTGTGACTTCGATACAGCAAAGCACGAAGTA GAAA GGCTGATTGGCTATGGCCCCGAG ATTC A  
AG TTTA CGGAG ATCC AGCTCTTACTGGAAGAGT GAA GAAATCT CAAA AATCC GCTAATGAAGAAGCTGCT  
CTTTTA GAACACAATTATGTTGGAACGAACATCT CAAATTAGGTATTCTCAATCAATCCGATG GAGTGG  
C CAAA CAAGTATTA GAAA CAAA CACGT GGATCC TAAAGAAA TCC GAAAAGAGAT TTAAAA GAAT TAGA  
AACATTTAATTTA CACTC CCCCCCTCTCTCCATC ACTC CTA GAAA TACTAATAGCTCTTCTTCTTCG  
AAA TCTTCTTCTCC TTTAGGAGGTCATAC CAAA GGCGGAGATAAA CCT GAAA AAC TTTCAGC CAAA AAGG  
CGTACGGTTACGACTTAACAGAAA TG TTAAAA GAAT CGCGCCTCGATCCAGTGATCGGGCGTTCTGCAGA  
AGTCGAACGATTAAT TTAAATTC CAAA TCGTCGAA GAAAAATA ACCCAGTCTTAGTTGGAGAAGCTGGA  
GTAGG GAAA ACAGCCATTGTAGAAGGCTCGCTCAGAAAATTGTCTCAGGAGAAGTTCTGAAGCTCTTC  
G TAAA AAACGCTTGATCAC TTTA GA CAAAGCTCTAATGATTGCAGGAACCAATAACAGAGGGCAG CAAA  
AGAACGCATCAAAGCTGTGATGGAT GAAGTTCG TAAA CATGGGAAC ATCC TCTTA TTATTTGATGAGCTT  
CACACGATTGTTGGTGCAGGAGCTGCTGAAGGAGCTATCGATGCTTCTCATATTC TAAA ACCAGCTCTAG  
CTCGAGGA GAAA TTC AGTGCATTGGCGCTACG ACCC TAGAT GAAT ACCG TAAA CATATA GAAA AAGATGC  
CGC TTTA GAACGTCGGTTCCAAAAATCGTTGTTCAACCTCCTAGCGTCGAT GAAA CAGTAGAAA TTC TC  
AGAGG TTAAAGAAA AAATACGAAGAGCATCACAATGTCTTCATCACTGATGAAGC ACTC GTTGCTGCAG  
C TAAA CTC TCTGACCAATATGTTTCATGGTCGA TTTC TTCTGTA TAAA GCAATTGACCTCTT GGAT GAAGC  
TGGAGCTCGTGTAC GAGT CAATACGATGGGACAACCTTCGGACCTGATGCGTCTAGAAGCTGAGATA GAA  
AAAAAAAACAAGC TAAA GAGCAAGCTATCGAACTCAG GAATAC GAAA AAGCTGCTAGCCTTCGTGATG  
AAGAGAAGAAGTTAAGA GAAA AATTAG GAAA TAT GAAA CAACAGTGG GAGT CCAATAAGGAAGAACATCA  
AGTTCCCGTTGATGAAGAAGCTGTTGCACAAGTAG TTTC CGTACAAACAGGAATTC CTGCAGCTCG TTTA

ACAGAAGCTGAAA GC GAAAAACTTTTAACCTTAGAAA CGACTC TACAAAAGAAA GTAATCGGCCAAAGTC  
AAGCTGTTGCTAGTATCTGTAGAGCTATCCGTCGTTCTAGAACAGGCATCAAAGATCC TAATAGACCTAT  
GGATCC TTCCTATTCAAAGGCCAACTGGTGTGGGAAGAC TTTA TTAGCGCAGCAAATCGCAATTGAG  
ATG CAAA GAGGAGAAGATTC TCTTATTC AAGTGGACATGTCTGAGTACATG GAAA AA CAAA CAGCCACTA  
AGATGATG GGAT CTCTCCAGGAT ATGTCCGGTCATGAGGAAGG GGGT CATCTAACAGAGCAAGTCCGTCG  
CCGCCCTTACTGTGTGTGTGTTG CAAA AT GAAA TT GAAA AAGCACATCC AGATATTATGGACCTTATGCTT  
CAGAT CAAA GAGCAAGGGCG TTTA ACAG ACTC A CAAA GACGTAAGATCGAT TTTG GTAATACCATCATCA  
TTATGACTTCTAACCTAGGAGCAGA TTTAATTC G GAAA AGTGGT GAAA TAGGG CAAA GGCTTCGTTCTCA  
CATGGACTATGCAGTTATCAAAGAGAAA ATAGATGCTGCAGTTAAGAAGCATTTAAA ACCTGAG TTTA TC  
AACC G TTTAGATGAGAGT GTTATC TTTAAGCCTCTT GAAAAAGAAGCTC TTTGAGAGATTATCC ATCTAG  
AGATTAATAAGCTGGGCTCTCG TTTA CAAA ACTATCAAATGGAT CTTAATATTC CTGATTCAGTGA TTTG  
CTT CAAA GTAAC TAAA GGGCATTCCGCC GAAA TGGGAGCTCGACC TTTAAGACGTGTTGTGGAGCAGTAT  
CTGGAG GGATCC CAAA GCAGAAA TGCTATTGAAA GAGT CTTGCCGACAAGAAGCTA GAAA ATTACGCGCGC  
GCCTCACAGAAGAACGCGTTGT TTTG CAAA GAGAAGAAGAAGCTG TTTCTGC TTTA GCTATAGAAGGCGA  
TGGCTCAGAGCCTATTACAGCTGAT GAATCATAGGCACTTCAATC ACTCCTCCTCC TAAA CAAAATGTCCC  
CCTGGTA GAAA GCTACCGTCTGTCCAGGGGTGACAGC TTTGACAGGGACATC GAAA ATCACT TTTA CCGT  
TCCATCTTCCAAA GGAT ATACAGAACA TTTG TCGTCAGGGGAT CTGTACCGAAC TTTAGCACTACAGATC  
ATAGGCTCCTGCAAGGGAACAAACCAATTAAGTTCCCTTAGC TAAA AGCTCTTGTGCGA TAAA G TAAA GGAT  
GATCTTC ACCC CTTACAATG TAAA CAAT ATTC T TTTG CATATTC TTGCTAAGAACATAACAAGGCT TTTG  
CATTC CTCTATG TTTA ACCC TCGACGCTGTCCAATCGTATAATAATGGGCTCCTTCATGTCCGCCGACT  
ACCTGTTGTGTATCAAATCAATAATGTCTCCAGGA GAGT CTGCTACAACTGCTCAAG GAAA CTCT TAA  
AAGGCCG TTTA CCAATGAAGCAAATCC CTGTGCTATCTTTT CAAA TGCGGTAGC TAAA ACCAGCTTCTTG  
AGCAATTCGACGTACCTCCGT TTTA TACATACCTCCAGGGGGAAA AGTACATT GGATAAAGCATCC TTA  
GGAGT GCCACATAA GAAA TAAC CAAA GTC TTTA TTG GGGT CTATTC CTCTGGACAAACCAGTTCATCAG  
CCCCCTCGACAATAATGTCCCGTGGC TAAA AAATCACCT TTTA GCTCAAGTACCTTCTTCTGTAA TAA  
ATCAAA CAAA ATTTCTCGATTGCATAACACATCAGGAT TGGGAGT GTAGCCGTTGCGAT ATTC TCTTAGA  
AA TCTAGAAAAC ACTC GCTCTTTA TATTC CTTAGAAA AGGAAA CTGTGTAATATG GAATGGACAATTGTT  
CTGCGATCCGCTCTCATCGC GAAA ATC CAAA GTTGCAGTACACTC ACC ATTC TCGTCTGCTCTCCCA  
ATT TTTGATGAAGAGCCCAACAACATTAT ACTCCCCTTGCTTC TTTAAGAGATAAGCAACAACCGAGGAA  
TCCACTCCTCCAGACATAGCAACAATGACAGT TTTA CGCACAATGAACCCAGAAA ACGT TTTG TTTATT  
GAAG CAAA CACATTACAAAGGGCCATCATGTTAGCAAAAAAATA GGAT CAAAAAACCTATTTCTCAAGC  
CGCTCT TTTAAA TCTTAATTACAAAAAGACAAATTA ATTC AATT TTTCAAAAAA GAATTTAAA CATTAA  
TTGTTG TAAAAAACAATA TTTA TTC TAAAATAATAACCATAGTTACGGGG GAAT CTC TTTGATGG TTTA  
T TTTA GAGCTCATCAACCTAGGCATACGCC TAAA ACA TTTG CAAAAAA GTTCACC ATTC GTTCTCCGAT  
AAGCATCC TCAAATGTC TAAA GCTATGT GGAT TACGG GGATAGCCCTCGCAGCTCTATCTCTGCTCGCTG  
TAGTCGCTGCGTTATTGCCGTCTCTGCGGGAGGAGCTGCC ATTC CTCTTACTGTCGTTGGTG GAAT TGC  
TGCAATGTCTGGCCTCTT ATCC GCTGCCACCATTATCTGTTCTGCAAAAAAGGCTCTGGCTCAAC GAAA  
CAAAAAACACTAGAAGCGTCCGTTAGATAATGCGACCCGAGCATGT GAAT TACCTGACCTCAGACA  
CCC CTTAT TTTAATCAATGGGAATCC TTAGATGCTC TAAA TAAGCAGTTGTCTCAGATTGACTTAACTAT  
TCAAGCTCCC GAAA AAAA ACTAT TAAA AGAAGTTCTTGTTCCAGATACG ATTC CATTAATC ACTC CATC  
GAAGAGATCTCCGATCGC TTTA C GAAA ATGCTCTCTCTCTTCGATTAAGAGAACATT TTTA TCGAGGAG  
AAGAACGTTAT ACCC CTTA TTTA ACCC CTCTCTACT TAAAAA GAAT CG CAAA CTGATCCAAATCACATC  
CAATATGATTAGGAT GCTACCAAAATCC GGTGGTGT TTTG CCTCAAAGCCAATACACTAAGTCATGCC  
AGCCGCACACTATATACAGTATT GAAA GTCGC TTTA TCCTTAG GAGT TCTCGCTG GAGT CGCT ACTC TTG  
TCGTC TTTGTTCCCTTAGCCTGCCT TTTA TCGCTGTTATAG GAGTATCTTCTTAGCATTGG GGAT GGC  
ATC TTTGCTTATGATTC GGGGCATTAAGTA CAAA CTCGAACATTC TCCTCT GAATA GAAA GCAGCTAGCT  
AAA GATATTC AAAAAACCATTAGCCCAGATGTCTGGGCTCTATGGTTCATTACCAGCATCAATTACTAT  
CACATCTACAT GAAA CTC TATTAGATGAAGCCATCACAGCTAGATGGGGCGAGCCCTC TTTA TTGAACA  
CGCTAATCTTAAGGCAAAAATTGAAGA CAAA ACAAACAATATGATATATTGAACGCAGCC TTTA TAAA  
TC TTTA CAACAAGATGAGGCGCTCCGTTCTCAAGTAGA GAAA CGAGCTTACTTATTC CCAATTC TAATA  
ACGAC GAAA ATGTC TAAA AC TAAA GAAT CGCAGCTTCTAGACTC GAAA ATGATTC AAATTC TGAAT TTTCA  
GGAGATTA TAAA TAAA GGACTAGAAGCTGCCAA TAAA CGACGAGCTGACGCTAAGTCAAATTC TATACG  
GAAGAC GAAA CCTCTGACAAAAG ATTC TCTATATG GAAA CCC ACAAAGAACTTGGCATTAGAAGA CAAAT

GGAGAGTGCATGATGAAGCTTGCAATGAAGAGCAACAAGCTCTCCTCTTAGAAGATTATATGAGTTATAA  
AACCTCAGAATGTCAAGCTGCCTCAAAAAGT GAGTCAAGAAGTGAAGGCGGCACAAAATCATTCCCA  
GTCCTAGAAAAGCATGCTCTAGACAGATCTTATGAATCCAGTTTAACCATGATGGATTTAGCTAGAGCGA  
ATCAA GAAACACACCGGCTTCTGAACATCCCTCTCTGAATTACAACAAGTACACAATACCTGTTAGATAA  
TCACTAACGGTTCTTCA TAAATGACAAAAA GAAA AAGGAGAGCTGTTGCTGTGCTCTCCTT TTTC TC TAA  
ATATTCCT GAAA GACTAACCTTT TTTA TGGTTGCGTTGAGCCTCCTCCTCCTGTTCCCGAGGAGCCCGCAA  
CGGTAGAGTCTGTAGCATTAGAAA TGATAACAGCTCCTACGATCATAGCAATGACGGTAACCACCATAGT  
ACATACAGAAA TACCGAAGTTAGCTCGGCG TTTC GTAACACAAGAAGAGCAAGGCCAGTCCGTCTCCGAA  
GAAT CACAACGGTATTGATGAGCA TTTA GATAGGACATAACATTAGTATTA CAAA TAGAAGCTGTAGCTG  
CGAAGTAATTCCTGGCTCCTTATGCGCCTG CAAA GTTGAGCTGCGGCAACAGCTTCTGCAGC TTTC TC  
ATCAGCCTCAGG TTTC TCCGTC CAAA TTTC TTGGCTT CAAA AAGAGCGGCTCGTTGTCTTGCTCTAGCA  
TTTACAGAATTTTCATTGCGT TTTA CACGTGTAGTCAAAGC TTTC TCCGCATCATAGCGCAATGTAGAAG  
TAATACTTCCGTCTCT TTTAAGATTC TCACTTACCGCACAAAGCCGCACGCCAGG TTTACGAGCAGTCTT  
TTCTTCGTGTAACC ACTCACGAAT CAATTGACGTT TTCTTCTGGA GAAAGAGAAGCTCGAGCAGCAGCT  
ATTGCTGCTTC TTTA GGACTCAATTC TTC ACTC TTAGCAAGAGAAGTATTTA CAGGCTT TTTC TTGAGAA  
GC TTTC TTTA TCATCTCT TTTA CTATTACATAGCCAATC GAAA AATTC TTTC TCAGACTGAGT TG CAAA  
TCGTTT TTTAGTCG CAAA ACCACT ACTCGAGGCTC TTTA CCTCGAGCCTTGTCTCTTTTTTTTCGCAGTT  
AAA CGCTGCTCATGA TTTC TAGAGAACAATCCA CAAA TAATACAA GAAAAGAAA TCC TT TTTC TCAAAG  
AAGCCTTCCATGCAGAT TTTC TAGAAGCACATCTTTT TTTA CGAAGTTT TTTAAGAGCCTGTCCA GAAAC  
TCCCTGTCAGCCTGCAATGCCTCTTCCGCTTGTGCTTCCATAATAGTAGGAA GAG CAAAGCTCATCTGA  
CTTGCATG ACCCATAGTAT GGGT GAAA GTCAATAAGATC GAAA GCATAGCAAGTTGCGAAGTAAGCTTGT  
AACCAGCATGACGGCAC TTTC TCCTAGATCC ACCTTAGGGAT CACCATAGCAACAT TAAAGCTTT TTTC  
ACAACCTGGACGTACAATTC TTTT TTTA TTGATAACTTAATGAA CAAA AGCTTCCCAATTTTTTAACAAAA  
GC TAAA AGCTGTGGCTGATCCGGATGCTCCTTAA GAAA GAGT CGAGCTT GAATAGACATGCCTAAGTGCA  
CGAT TTTATTCACAAGATTC AATGA TTTCTATCTTGATTAGC GAAT AAGAAGAACA GAGTATCAACAGG  
CTTACCCTCAAGCGCTCCATATTC AATGC CAAA AGATAA GAAA ACGGGAACAATAATATCGT ACCCAACG  
TTAATCAAGAAGTCTTAGCATGAGG TAAAGCAATTCCTCTCCGATACCTGTAGACATAAGAC TTTC CC  
GATGCATAAGCATCTC GAATAGAACTACC GGATCCA ACTCGAACTTATTAGCTATATAATGAGCAGCATA  
CCGTAGGGCGCCTTCTTACTATCTACAAGAACATTT TTTA GAACCCCTCCCTA TAAATAGCTCGATAT  
AGGCTATATCTAAGTGACAAATCC TTGGACTC CCCTT TTTC CTCTCGTT TTTC ATCTGGAATAACCCCAT  
GATTGTGGATAAGCCAGTCTTCTACTTCTTCTCTATT GAAA CGCAACTCATCGTTAATCGTGTAAC TAGG  
GATTCCTCCACAAGAT ACCATTGTC GGATAGAAT CTTCTGCTACATCCAATAATACAGCTAACTGATCT  
AATCGCAAATCCATAACTAGACTC CT GAAAAAACACTCATAACTCTTCAACAG CAAA CACTTGTAAGAG  
TTGTGATCTTCTGGCTTCATCTCGCAAAGATTGTGTTAATGCCGATAACAG TTTC AGATATTTTC GAAGGG  
GCATCAGATGGCCCTCCAATAA GAAA AACAAGCCGCACAGACA ACCCGTCTATAGC ATCC CACAAAATAC  
CCCTCT GAATGGATGCCTAGAGCAA TAAA AAAATCTGC ACTC CCATCGAT TTTC CCATGAGGAATAGCTAC  
TCCATAACCGATACCTGTAGACATAATATTC TCTCTTGCCAATAGAGCAC GAAAGAAA GCCTCCCTATCT  
TCCAGTA ACCCAGCTCTGGCAGCTAGCTCC GAAA GTTCAAAAA GGATATCTTCTCTAGTATCT GAAT GTA  
A GAAA GTGAT TAAA TCTGAT GAAA GTAACGAAC TAAA GTAACAGCTTGCTTATGGTCAGCAACGCAAGT  
CATCTTAAC ATTC CCCAGTATGCCCAAATCC ACCGGTTC CCGCGCCGTAGCGGTTA ACTC TTCTGAGT  
TTTC GACAAAAGACACTTGTTC AACC CAAA CTACAACAAGCTGTGCTATACGC ATTC CGGGTCTACAATG  
AATGTAGCTTCGCCAAGA CAAA TAAA ATAACCCGAA TTTC TCCCCGATAATCTGCATCGACAGTTCCAG  
GAGATTGAAGAACAATAACGCCGTACTTGCTAGCTAATCC ACTACGAGAACGAAC TT GAATCTCGT ACCC  
ATGAG GAATTTTC CACA GAAATCC CAGTAG GAAT CAGGGCTCTCTGCCCTGGCAAAAATAGCTATAGGCTCA  
TTGATA CAAACACGGACATCTGCGCCAGAAGCTCCAGAAGTAGCAT ACTCGGGT AAGGAGCTTCCAGACT  
CCAA TTTA CAGAAA AA TTTC ATAGAAGGCCCTCTT CAAA AAGAGCCGCCTATGATCT TTTACAAA TTATC  
ATCTGTCAACAAAAAATCTC TTTA ATGGTCTTAGAGATATCTCTGGGGCAATTACC CAAA CCTCCAGAA  
TATGCC TGACAGCT GAAA AAACTTAACAAC TTTC TAAAGTTGT CAAA AGCTGT TTTC TCTCTACTACCT  
TATCAATC ATCC CATGTTCTAATAG GAATTCGGAT CAAA AGCTCCTTCCGGAAGATCTTCCCTATCAC  
CTGAGATACTACTC GAGGTCCAGC GAAA CAAAT TAAA GC TTTA GGCTCTGCGATAATCACATCTCC TAAA  
GAAGCAAAGAAGCAGTA ACTC CCCCAGAAGTAGGGT TCGTCAAAAACG GAAA TATAAGGTAGCTTGGCTT  
CATGTAACCTTAGCCAAAGCAGCAGATGTT CAAA CCATCTGCATTAAG GAAA AAAACAG ACTC CTGCATCCT  
AGCTCCCCCTGAAGCGGAGACAATGATAACAGGCAACCGAGAGT CTATAGCCTTCTCTATCAAAC GAGTA

AGCTTCTCTCCAACAACAGCTCCCATGGAACCAGCCATGAAACTGAAATCCATAACGGCTAAAGCAACAG  
GATAACTTCCGATTGTACAGGCCCGACTAAAACCCCTTCGCTATCAGGATTATCTTTACGCGCCTTCTC  
CAGACGATTGGGATAGGTATCTGTATCAACGAAATTCAAAGGGTCTTGCGAACGTAAATCCGAAAATAAA  
GGATTCATGAATCTTTATCTGCCAACATGCTATCCGTTCCGAAACACTAATCCGATAGTGGTACGAAC  
ACAAAAGACAGCAATTAAAATTCGTCCCAACTCATTGGCATGAATCAATTCGCTACAATGCGTACATTT  
TAGCCAGCCACTGAAGCCATCAGCTTTTATTTCAAAACACCAAAATCCAAAGTTTATCGTAAGAAAATAAA  
CGCACAAAACCATCCCTTTCACAAAAAATTGAGCAATAATTTTATTATAATTTTTTAACCGATCAATAA  
TAAAATTATTGCTTGCTCAATTCCTACAAAGCGATTCTCTATATAATCCCAATTAATTATGCTCGGAAAC  
TTTTAGATAATCTATTCCTACATTTTATACTGGAGATAATATGCGTGCTCCACACATCTACTCCTAG  
GAGAGGATCATCCCGTTCGTCGCTCTAGAGGATCCGCGCAAACTGTGGTCTGTACCACAAGCTCTTGT  
TTCAAAAGACAAAAAGCTAACCATCCAGCCAGATCCCTTGACTGCAGCAGAAGAAGCAATAAAATTTT  
TTAAAAACTATCGAAAGAGCCCCGAATTTTTCGATTAATTTTAGTAATTCATGACGAGGAGGAATCC  
CCCTCCTTTCCTTGAGGCGCAAGCATCTCCAGAAAAGAGAGTGGTTAATATGCCCTCCACCATTGAAA  
CGCAGAGCAGGATGATTGCGATTAGCCTTGTAAACTTTGAGTAGCGCAAACTACATCTAAACTTTTAA  
AGGCCTCATTCAAATTAATTTATATATCCCTTGGTGATGCTCAAAATGATGCAGTTGCATAATCTCAGCACT  
AATTACAGGCTCTAAAGCATCGTAATCATAAGGCAATGCGGGAAGCATATAAGAAAGAAAGACCATAGCC  
ATCCAAAATAAGGTTACTATCCCTGCCACCTTCTCTATTTCTACAGGCTAGCTAGATAGATCCCTC  
TAGATTATCAATAAAATATTCACTGTCAAGAGCTATCCACATCTTTACGTAAGTACTGATGCTAAGAGTAAA  
AGGTGACTCTTGGTTCTTTAATGAATGTTGCAAAGCTTCAAAACTCTCTTTCTCGAGCTTCACGGA  
CAGTTCGCTCTTTAGAAAATTCGAAAACCAAACTTGAATTTCAAATACAGCTTCATTTTCGGCTCAGT  
TCCTGAAGGCCGTACAATTACTCTACAATCTCTTCATAATAGAAACAAAGCATCGACATCTTGGTAAA  
GATAACAATACGTAATATCGGTAACAAAATCGCGTCTTCCCTGTATTGTAATTTTCAAAGGCAATTA  
ATTTACGACTTGACAAAGACATCCGAAGAGGATCCGTTGTTTTCCAACGATCCAACAGTTCTTGTTCCTCG  
CTGAGTTGATCGATAGGAAGATCTATCGACTCTGTCCGTTAGCATAATAGCCATAGACCTCATAAAGC  
TCTAACAGAGCATCTCGTAACGTACACCTCGTATTTCAAACTGCAACGCTGCCTCAGAAATGAGCACCG  
CAGCAATCATAGCGTCTTTATCTTCTACATACGAGCCATACAGATACCCATAAGACTCTCTCTGCTCCAAA  
AATAAACTCGCTCCATACCGGAACGCCATAATTCATTTTTACCTATATAATTTAAAGCCTGCACCAACA  
TTAACGATATTGGCTCCATAAGACTCTGAGATAGCTGTAAAAGCTCTGTTGTTACAAGGCTCTTCACTA  
CTTTATCTTCCGCACCCAAAGGAGCCTCAAAAGACTCTTTACTCAAGATATGTGCGCCAATAAGCAAGC  
AATCTGATTACCGTAAAATCTATAAGGGCCTTCTTTCTCTAAAGAAAACCCCTATTCTGTCCGAATCT  
GGATCTGTTGCGATAAAACAATCATCTTCAAACTCTACCACAAACTGAATACCCAAATACCAAGCTTCTG  
GATCTTCAGGATAGGAAGAACCCTGTAGGGAAGTCCCCTCTGGAACCAAAAATTTTCAACCAAGA  
CACTGAAGAGAAAACCAATCTTTCATATCCCTCGGAATCATAGTTACTCCAGTACCATGTAGTGGAGAA  
TAACTGATTCGTAATAACGAACCATGCCGCCGATTATCTTCTCGATAACTGCAGTTTATGTAGAGTTT  
CTCTGATGTAATTCCTCATATCCCTTGAATCATGCGAATATATGGATGATCTAAACTCTCTACAGCAGA  
GACCATCTCCACCTCTGGAACCTTCCATGATTCCTGATCCATGGCGGAAGGACTTGTCTCTGTT  
GACATGTATACTTTAATAACATTGTAGGCAGGAGGATTATGCGAAGCGGTAATCATGACCCAGCTTTAG  
CCTGAAGCTCTCGCACTGAATAAGAAAATAACGCCAAAGGCTCTGGAATCTGAAATAAAATAAGCAAGAAT  
ACCGTTACCAGCTAAAACCTTAGCAGTCTCTTGTCCGAACCTCGAAAAGAAATCATGACGCGTATCATACCCA  
ATCACAACACTAATCTTCTCATCTGGATATCTTCGCCTTAAGACTCGGGCTAAAACCTGTGTTGCTCTCC  
TAATGTAAAACAATTAAGCGACAATCCCTATTCCTATGAGACCTCGTAATCCGGCAGTCCCAAAGGT  
CAACGTCTCACAAAATACTCTCTCAATCGCTCAGGATCATTATCAAGCAGGGTAAAACAGAGGTGTGG  
TCGCAACAACATCCCAAGCCAAGACAAAATGTTCAAAGCTGCAAAAGGATCAACATTCCTCTATTT  
TCCTCTAGGAATTCCTATAAGACAACCTTCCGATCAGAACGAAACTCATCCACGCTCTATCAAATAC  
AGATAAAGCGAGGACAAAACGGGACTATACGTCAGGCTTCTGTTCAAATAAAAACCTTGCTTAACTTAG  
AAAAGTGGGATATGCACAAAAATCCAAAAGAAATAGTTAGAAAATCCCGCTGAGGAGAACCTAAGAAATGATT  
GCTGTATCTCTGCCCCCAGTCAAGACGTCCTGAGGATATTCCTCAAAAAGAAAAGCCCCAACCCAG  
CTTTTCTCCGAAAAGCAAGCAGCACAGAACAATCACAGTCATCGAAGAGTATTTCTTCTTGCTCAAA  
CACCCAAAGATCCCTAACCAAGCAACCCGTGAACGATGGGTAAAGCTCAGCAGCTAAATGATCTAAACGA  
ACTCTCTTGACTATCATCTGCCTCCGGTAAAAGTTCGATGAACATTCCTCTCCAACGCTGAAGATGTC  
GATCCTTTACCACGGCAACCTCCCTTAGAAAATAGCTTCAACTCCGCTTCCAACCTGTTTACAGTCAAAA  
AGGAGCCAACCCCTCGAATAGGATGTGCCCATGATCAAAGAAAATAACGCTTGTGCTCTAGGTGAAA  
GCCCTCATACTCACTTAATTAAGGCGAATAAACTCGAAAGTACTATAGACTTTAAGATTAATTCCTCGCTAT

AAAACCCGATTGACTCTCAAGATCAAATATTCCTAAA AAATAGTTATGCAGCACACAGTAGATATCCAA  
GCTATCGAATCTAAA TAAATTTACTTTTCATCCAGACTTCTTATTACAGCTCTGACACATCCCTT  
CTTATAGAATGAAFTTTCCTTCTGCTGAAGAAGATAGCGAACGCTTGGAATTTCTCGGAGATGCAGTTT  
AGGATTAGTAGTTACGGAACATCTTTTCCTTCTTTTCCTGCACTTAATGAGGGGCTCTTATCAACAACG  
CGAGCAGCTCTAGTAAATGCAGAAGCTTGTTTCGAATACACACAAAAATTATCTCTAGGAGAGCATCTCT  
TGATTGGTTCGCGGAGAAA AAATGCAAAGTCATCGAGGAAAATCTCTGCATACGTAATCTGTTTGAAGC  
TATTTTAGGTGCTGTTTACTTAGATGGCGCCTATCTCCTGCTAGACAAATCATAGTCCCTCTTCTACCT  
GATAAA GAGTCTATTC TTCTCTCATGCTCGTGAATCC CAAAAATCGTTACAACAATTCACACAACAA  
CAC TAAAGTGCTTCCCTCTTA TAAAGCGTTGCCTTGAAA TCTGAAGACGGCTCTCCTGGTTATCATGT  
ACAAGTC CAAATTAATGGGATC CAAAGGAGAAAGGC CAAACAGGAT CAAAAAAGAAGCA GAAA AACTT  
GCTGC TAAACAGGCGTTATCAACACATGACAACAAAAAT TAAACACACAGTGGACGTGTACGAATGTGGC  
ACACATTC TCCAAAAATGGTTGGGACAATGTTCTGGATGTCTCCAGTGGAAATACACTAGTCAAGAAA GAA  
CAGCTCC TAAAC TAAACACATCTTCTTACTCCTCTAGCTCTTCTATTC CCAATACCAC TAAACAATGTGGA  
ATTTAGGAAGAAATACGAATTCATACCCAAGCTCAAGGCTGGAATCGCCTTCTAGGAGGAGGAACGGTC  
CGAGGTAGCCTCGCTCTATTGGGAGGAGAGCCTGGCATAGGAAA GTCTACTTTACTACTTCAAATTTTCCT  
CACAATTCGCGGCAGCTGGTCA TAAAGTGTTGTACG CAAACGGAGAA GAATCCGTGTCCCAAACCTCATT  
ACGAGCCCAACGCTGCAAATCTCTAGCAACAATATTTTTCCTATTC CCAAGAAA CAAATCTGAAAGACATC  
AAACAACAGATTGATAACATTGCTCCAGACATATTAGTTATCGACTC TATCCAGATCATTT TTTCTCCAT  
CCTTAAGCTCTGCTCCAGGATCGGTTGCTCAAGTGAGAGAAA CGACCGCAGAGCTCATGCATATAGCAA  
ACAAAAACAGATCACAACTTTTATTATTGGACATGTCAC TAAATCTGGAGAAA TCGTGGCCACGTATC  
CTAGAACACTTAGTAGACACTGTTCTCTAT CAAA AAGGTAATGTGCATGCTAATTACCGTATGATTCGCT  
CTGTTAAGAATCGTTTCGGCCCAACCAATGAAT TATTAATTTTATCCATGCATACAGATGGAT TACGCGA  
AGTAGAAAATCCGTCAGGTCTCTTTTC TACAAGAAA AAATGTAGAAA CTACAGGCTCTACCATTATCCCT  
ATTGTAGAAGGCTCTGAAACTCTTCTTGTAGAAGTTCAGGCTCTCGTTTCTTCATCCCATTTTCTAATC  
CTGTACGAAAAACATCCGGACAAAATCCAAACCGATTTTCTTTACTCTTAGCTGT TTTAGAAA AAAGAGC  
GAATAT TAAAT TATATACATCCGATGTCTTCC TTTCTATCGCTGGAGGCTT GAAAATCACACAACCTTCG  
GCAGACTTAGGAGCGGTGTTATCGGTGGTGTCTTCCCTATATAACCGCTATTTACC TAAAAATTATACCT  
ATACTGGAGAGATCGGCCTAGGAGGAGAAATTCGTCACGTTTCACACATGGAACACCGCATAAAAGAAAG  
CATTATTATGGGGTTTAAAGGTATCGTGATGCCTCAAAGGCAGATAAAAGGCTTACC TAAAGAATTTCTG  
GATCAAATGATATTATTGGAGTAAA AACAAT TAAAGATGCTGTCCGTTACTACAATGACCCATTTTTA  
GCTGATTCAAATTTAGGGAACATTC TTTACGCAA GCATCTAGACAATCTTCTCTGGCAGTTCTGCAAG  
CTCACGAATGCCTGAGAAA ACTACAGATATT TTTCCCTCGATTATGGGGACAGATTATCACCACAAC  
ACAGGGTGATCTTGATCAAGAGACACCTCTGTGTGCTGTA GAAA ATACAGGTTT TTTACAGATGATGTC  
GATTTCTTGGTGCAATCTGGGCAATGTGATCTTGGTATACATTC CGCTAAGGACCTTCCA GAAAATCCGA  
AGGCAACGGTTGTCTCCATTACAGCCAGTATAGATCC TCGAGATATCC TCGTATTTTCATGAAA AATACCT  
TTCGATCCCGTTACCTCGCCGTTTA CGCATAGGGAGCTCCTCCGTGAGAC GAAAAGAGCTTCTCTCTG  
CTCTATCCCTCTGCCATTATTACCGATATTCGAGGGACTATCCAGACTCGCTTAAA GCTGTTAGAAGAGA  
AAAAT CAAAATGCCATAGTCATGGCTAATGCTGCGGTGTCTCGACTAGGACTACGTCTTCTTGCACAAA  
AATCC TCCCCC ACCCTATCATCC TCTTCAAGGACGTCTAGCCATCACTGCTAGCCGACATATACGGAGC  
TGGAGAGGTTTATTC TTAACCTTGCGGCATCACAGAAGATGTA GAAA TTATGTGTT TTTCTTAAACAAAAGA  
TTGTTAAT TAAATTA TAAACACCTCTAATTGAAGC TTTAGGGT TAGTG TAAAATCT TTTAAAAGGTTT  
TTATTC CATGTAAA ATTGTAATGATATCCGCCCTAACGATTGATGGGCGACTGCTGAGAGACCTAGAGTG  
ACCTACAGTCAAGATCTGAATACTACGTTCTCTTTAGCTTCACTGATAACGCTCTTCCCAATGT TTTAAT  
AACTCCTCTCGTATCGGCAACGCAACTCGTTGAATAGTGAGGTGC ACTCCGGAA GAATCT TAAA AATCTT  
GGTCCACTTGTCTTGT TAAAGACGG TAAAGACCTTGAAG TAAAGT TTTCTTAAACCC CCCTTGGGGAACCA  
GTCAGTAATATGTACTGGCCCATATT CAAAAGAGATATGTGTTATGTCCTCAA TTTTCATCACC GGAAA  
ATTC AAC ACCCTCTCCCAACACTGCCGCCCAATCC CCCCCAAAAA ACTGGTGGCCACAGTAAC TTAT  
TG CAAA T CAAA GCTCTGCTGCCTGTCATA GGAT TAGGTGTGCAAT TTTACTTATGCGCTAGACGCGCAA  
TTATTGGAAGGGT AACGCAGCAATCGCAACTGCCGGT GGAT TAGGTCTTATAACCATTGCCGCTGC CAAA  
ATGGTTGTTATC ACCCTATAATCT CAAATTTA CGATACTTATATCAGCTTCTCTGCCAATTACCAGCTC  
ACTGCTGTGGAAGCTCTCATCAAATC GAAATCTAAGCCAAAAAGCCC TTTTC TTTATGAG GAAA GGGCTT  
TTTATTTCTTTA TTTT TTTAATCAAAAAAATTGTTCTCCATAGAAA GATAAGCTTGTGCATATT TTTCTGT  
ATCGTCTTGGAGACTC A TTTAAA CAACGAAGA GAAA GTAAC CAAAAA CAGCGTCAT TTTCTTCTCCA



CCAGACAAGATTATC TAAATAATCAAATATATCACCGTCCACACAT TTTCCGAT TAAA GCTGACTTACCG  
TATTTATACCGGCAACGA GAAA AATGCGC TTTA ACAGCAACACG ATCCCAGTCAAAGCTAAGTAGC ATC  
CCCAA GAATAAA TGCTTCC GAATACTC TGCCAGCTCTTCGTCTAGAGG GAAT CTATCA TTTA ATAGCTT  
ATAAGCTCGCTCTAGATCTCT ATTC CA TAAAT GGGT CTGTATTATA TAAACGA GAAT ATGATCGCGCTCC  
TCTTCACTGGCT GGGT CATAGATAGCTTG TAAA AGATCTAT GAAA GACTCGATCTCTTC ATCC AAAAAAG  
CCTGTATGTGGAAT ATATCC AAAGCATACAACTGCAAAG TAAA TG GAGTCTTCCA TAAA AGCTTCTTAGC  
TT CAAA ATAATCC TTGTTC CGCAAAGCCTCC ACCC CCTTAA CAAA GAACATTAATTC CGCTACCT CAAA  
TTGTG TAAA GACTC AGG GAAT GTGA TTT CATC GGAT AC GTTCGC TAAA GCTGTAGAGAAT TGCA TAAA TG  
CTTCCCTGTTCCCT GAAA CTC CTGCAACA TAAA AAATATCTGCAAGCGCTTGATAAT CCCGCAATTC CCC  
TGCTCTAC GAAA TAGTTCGGGAAG GAAT AAG GAAA ATCC TGTC CAAAACTAAG GAAA AGCTCCATCTTA  
GAAGATC TAAA CTGCAAAGGAGCCTTATCTACCTGACAGAACAAGGTAGCTTGTGCTTATGA TAAA TAA  
TCC TAAG GAAA CGCTTCTCCTCTCTAACACTAATCT TTTCTGGAGCG ATCC ACAAATTAACAACAT GAA  
TACTAGCGCTTCGCTGCGATGCTTGTG TAAA CTATCATAACAAGCGGAAGCAAAGATGATCTTCTAATCGC  
GGAAT CTCGGGGT GCTGT GAAT ATCTT TTTAAA GCAAACAACAAACATCGTATCTCTTCTACAAACTTC  
CGTTCCTCTGG TAAA CTAACGC CAAA CCAAGAT ATTC CAATGGGGCGCCAGCACCTCCATGAAGATAATC  
AAAAGA ACTAAGAGCTTGCGTCAGATCTCCGCCCTGCTCCTCAA CAAA AGT TAATAAGGTC ACTC CCAGA  
C GAAA CTGCGCTTCATAAC TTTCT TTTCT ACCCG GAAA AGAAT CTC GAATTTTA CGA TAAA AGATGCGAG  
CTTGATCATAACAGCT TTTCCAGATAAGAACGCGTCAGGAACAGC TAAA CAGCTGACTC GCAAAGCTCCTAT  
AC TTTCC GAAA TCGCAATATTGCTC ATTCCTTG TAAA TCTT GAAT AATGACGCCTAGACGATTACCTAAG  
CTAGGAAGGTAGTCTATATG TAAAA TAAATAAA GCTTGCTCAACAAAGACTGCGATTCTGTTGTCTGATT  
TTTC TATCAAATAGCAAACGATATTGCTGAGAAA TCATCTCTTG GGATTT TTTCT GAAT CTCTATTC  
ATT CAAA ATAAGAGAGACCGTAAGTTCATGATTC TGACAGAAA ACCATAGTCCGTAACCACAG TAAAAC  
TCTCCTCT TTTCCAGCCTCCTTAGAAGGTAG GAAA AGAATCCC ATTC CTT CATGAAC TGCACTT CAAA TAA  
CGGTAT ACTC CACACGCGTAGAAGCACTTATTTCCACCTCGGAGAGCA TAAA ATTATACCATTGAGCAGG  
GGA ACTTGCTAGTACAGG GAAA TAGCGTGAGAGT AGGATAGGGT CATAATA TTTCC AACACGAT TTTCTCC  
TTAGCCATCAAAGTAGCT TTTA CTGTCC ACTCTGGAT CACCC TGAAGATATGGCTGCAAAGCTTGCGGTA  
ACTC CT GAATAGAA GAAA ACCT ATCC GCAGGAT TAATGGCGATTGC TTTCCATAGCAA CAAA AGA TAAA GA  
AGGCG GGATTTCCCTATAGGGT GACATCTCGATAGGAGGCAAACAACATCTCTATAAGACAGCTTACGA  
CCTTTT TTTCTTCGATAAGG GAAA GC TAAA GTCAACATCTGAT TAAA GAATGAGCCCTAGTGCATATAT AT  
CCGTTT TTTCCGATGCTTCTACTC CCAACAAGC TTTCCGGGAGCCATATAATCTG GAGTCCCTACAATCTT  
GCCTG GAATGGTCATGCTGGAATAGCAGATAT TTTCTCTCGTC GAAT GAAA CAGCAGCTTCATC ATCC TGT  
TCTAGC TTTA ACTC CAAA GCATG TTTAAA GATAGCTGCTCCCAATCAACGATAACAACCTCCCAACA  
AACCCAGTAAGATATTATCCGGC TTTAAA TCCCGATGCAACACTC CTTTAGAATGAATGTATTCCACCGT  
GGCACAAT TTTA TCAAAAATAGGAAGAAAAGAT TTTA ACAGAGGTTT TTTCTTCTAGTTCTTTAGAAA GA  
ACTTC TTTCTGCCAAAC ACTC TTTA TAAA CT TTTA GAGAAA ACCC TTCTATATAAGGCATTGTGTAAT  
ATACAGCCTCACCATCGCTGCATATC GAATATACAGGAACAATACTT GGATGTATGAGGTCTGCAGCAAT  
T CAAA CCTCTCGCAAAAAGCGT TTTCTAAGCAGCGC ATTC CCACTC AGATCC TCTC GGATCC TCTCAGA  
GCC ACTC GACGAGAACACGC CAAA TCATGGGC TAAA TAGACTTCGCCATGCCTCC CAAA CCTATCAGCC  
TAATCAATTCGTATCGTTGCAAAAAGAACAGCCTCT TTTAAA GCGATGC GAG TTTA TC TAAA ATGC CAAA  
AACTC TCTCTGACT ATTC CTTAAC GAGTCTTT TTTA GCTTGTAC TAAA CTAGGAT TGGCGC GAGTAC GAA  
AATCTTCACTAGCCAATAG TTTA GACACACTATCTAT ACTCT TTTCTAGGC GAGT TTTCTCTT TTTCTAA  
ACGTACACGCTC TTTAGCAAGATGTT CAGGAGGAA GAAT CACTC CAACCTGAATTC CTTCTACAACCCCT  
AAA C TAAA AATACTGTCC CAAA GAGCTTCTGCAAGCTGCTCTACAGTT TTTA CTC CTCCCAAAGCACACA  
TGATTG GAATACAGAC ATCC ACCAGCTCCTT TTTCTCAGAGCTAATCACAAAAGCTTG TAAA GGCTCTCT  
AGGATCTAATTGCA TTTCAACCGC GAATATTGCGAATCGTATAAA CTAGCC TTTCTGCTATGCCAAATGAT  
TCTCGTAATCC TTGTG GAAA AGCTACAT GAATAGG TTTAGGATATTC CGCTACCATAACAAGCTTCAGAAC  
GCAACATGCTGACTGCATGCCCTGTACAGAATCC CCCTTCCATTC TCAACAGTTC TAAA GTTGCCTT  
GAGT TCAAAGAAA GAG TTTCCGTAATATAAGGAACAATTGGATGTAAT ACTC CCAAATATTGATCAAT  
AAGGTAGC TAAA AGCTTACGCTTAGTTGCTCGCTGTTGATCGCT ACCCTG TTTCCCAA TAAA GTAGG TT  
TAATGATTTCTAGATAAGTAGAACACAATCATT TTTAAA GAAGTCATAAGCCAAAGAAGCTATCTTATC  
AAAA GAGT AACAGTTATAGTGCCCATCTATAAGATCCAGCAACTC AT TAAA TCTATCTAAGATA TAAA AA  
TCTTCCAATCC AAGAAGATCTTGGTTG ACCCCTTCTTCCAAATCAGACTTGTTA ACTCT GAAA TATGCC  
CGAAA TAAA CCGAGCTCC ATTC CATAACTTATTGA TAAA GTTCTTAT ACTCTTC GAATAAGCGGTAGTC

GAGATCAA CAAA CTC ACCCCTA CAAA CACAAGAACACAAAGTAAGCCGAACCGCATCAGCTCCATATGCT  
TCTATCATCTCAATA GGATCGATAACATTGCC CAAA GATTTTCGAAA GTT TTTT CCA TTTAGCAACTACGT  
TCTTAGGAAGAGC TTTCC TTTA TCATAATCAGC TTTCCGTTCTCCA GAAACATAAAA ACCACTC CCCTTT  
TTT ATCAT ATTC GCGATAAGACTTACC GAAAATCA ACCCATG TAAA AAGACATCA GAAAATGGTTCAGTA  
TCGACCATTGCAGAGCACATCAATACC ATTCGCGTA ACCCAGAAA AAGA GAAT ATCATGTCTGTGCAC TA  
AA ACAGCTGTAGGAT TAAA ACTTCTTCAA ATCC AAACTGTCTTCATCAGGCCAACCAAACAAGTTAACGG  
CCATA ACCCGGAA GAAA ACCATGTATC TAAAACATCT GGAT CTTGATACCAAG ATTC TGGATCC CGCATT  
ACCTCTTCTGG ACCC CTTTCTCCATCAAAGCAAATTAC ATTC TCATCGTGT TTTA TTATGCCAGACAG GAA  
TACGATGCCCCACCAAAGCTGTCTACTAATACACCAATCT TTTA GATTATTTA CCC AAGTAAGGTAATT  
CCGTACGA ACTC TGGAG GAAA GATAC GAATTTT TCTACTA TTTA CAA ATTC CCGCAA GAGT CTC TAAAA  
GAAT CAACAGAGACAAACCACTGT CAAA AGAGATAAGGTTCAATGATCGCCCCGAACGATAG GAAA CTC  
CTACACGAGAT GAAT ACGTTCCCTT TTTAAC GAAT TAAA CCGAGAGCTTCCAAAGATGTGATAATAT TTTT  
TCGAGCTACTTCCCTAGA TAAA CCTGT GAAAATACCTCC ATTC TCATTAATCTCTCCGGTAGAAGTCAAG  
ATATTGATCATGGG GAGT TGATGGTTC ATTC CTGTCTTGTAATC ATCC TTATCATGAGCTGGAGT GAT TT  
TA ACAGCTCCTGTTCCAAAAGATGCGTCTACG GAAA AATCTCCAATAATAG GGA TTTT CCGATTTA CAAA  
AGGCACAACGAC CAAA GCCCCTAT TAAA TGA CTGTATCGCTGATCC TCAGGAGAAA CAGCAATCGCAGTA  
TCCCCAGCAAAGTCTCTGGTCGTGTTGTAGCAACAGTAAT GAATTC CTCT GAATTC ACAACTTGATAGC  
GAATGTAG TAAA GCC ACCCGTCTCTCTCCTCGT ACTC TACCTCATC ATCCGCCAAGGCTG CAAA CAAAT  
AGGGT CCCAGTTGAC TAAA TAAT ACCCTCTG TAAA TG ACCC CCTTATC GAAT TAAA AT TTTAAA AGCCTTC  
TTCACTGCACGGTTGGCGCCAGGATCCATAG TAAA CCGCTGACGAGACCAGTCACAAGAACAGCCAAGCT  
GTCGCAGCTGA GAAA GAAT GACGT CAAA ACTTT TTTT CTTCCA ATCC CAAACATGCTTCAAGAATTC TTC  
TCTA GAAA AATCTGTTCGTGCTTACCAAGAGAAGCT TTTA GATGTC TTTT CACAAC TG CAAA CGTGGCA  
ATCC CAGCATGATCGGTTCCAGGA ACCCAACAAACCTCAAATCC TTGCATACGCTTGTAAC GAAT GAGCG  
TGCTTGCAATGTA TTTA CAAGAGCATG ACCCATATGTA GGATCC CTGTAACG CAAA GTGGAGGCATCAC  
TATAGAATATGCAGG TTTT CACTACTTGCATTC GCTACAAACATACCAGAGCGTTCCAAAAC GAATAC  
ACCC CAG TTTT CAGAGCT TTTAGGGT CATAACG TTTA GAAA TTGATCTTCGTTTATGCCTTACTTCCATA  
TGTTGTGACTATTC TCGCATCTCTAATTAACCGATTGAGCTAT GAGTACGAGGTGAC TTTA AC GGAGAAC  
ATATTGCC TTTA GAGCTTGATTATGATCAAGCAAGAGGTGCCCTAAGACAACCTGAC TAAAAGCT TTTAAT  
GAAA TTACTTCC ATCC ATAAGTGATGGCTCCGACT TAAA ATTTCTTTA ACCATCT CAAA TCAAAGAAA CTT  
TA TAA GAAA TGATACCTTGCCGATCTTGGAATCGTTCTC CAAA AGGGTATATACCTGATAGCCT GAAAG  
ATGTTGCACATCATAA GAAAA CAAA GCAGCCTCTCCATTACCGTAATAT ACCC ATACGTGAAGAACCATA  
GGGAGA GAAT CTC TAAA ACGTGAAGGCAGCCCCCAAGTGACAACCTAGCTGCTGCCCTACAGACTC CGTAA  
CAC ATCC CCGATCTATACCTAGATGAGCTGCAGCTGTATAGTCACTTATCTA TAAA CTC TAAA AACGAAGA  
TAATGCAGGCTGCGAGC ATCC TCC TAAA CACAGAGCAGAGAACGCCGCTGCCACCACCTTAGAAT AACAA  
TAGCGCAAAAAC GAAA GCAAATAACGCAAAG ACTC AACAATCC CAATCGAAGCAAATGATTTA CCATAT  
ATTGCAGAGGAACGCGCATAGGCTT GAATAGC ACTC ACACAGCACTTCCCTTGCA TAAAAGCAGAAA GCA  
ATAACGCAG ATCC TACAGCTAT ACCC ATTACGATACCACTGACTGCAGAGACT TTTT CATCC TTAATTGC  
ATC ATTC AGCAGTAACAT GAAAATCAATCCG TAAA TGGAT TGTGACGAGGGCATAGCAGACAGACCAATA  
ATCTTCCCGTGTCTTCATCG ATTC GAGACATCACTGCGTGAGAAGCG ACTC CAGCC ATTC CAC ATCCAA  
CAGCGTACCAATCATTGCCAAAGCCATAGCCAATACAGGCCCACTACTGATACATCTATCATATA TTT  
CTCTCACTAGACA TTTT CTATTTT TTTT CAAAAACGCACAAAAACCTTCTGTA TTTAAGAT CAAA CGA  
CT CAAA ATAAA TTACTTT TTTT AATGGATGCAAAAAC TTTT CACCACCATCGAAGCTATAGTGATACC AC  
TC TAT GAAA TTAAGGCG TAAA CCAATGGATCACACCTCCATAATG GAAA GCGCAATA TTTA CCGTGTGCC  
CGAAGATAATAATTA GAATTC CTA CTGCGGG GAAA ATC TTTT ACTC ATAACCATCACAGT ATTC CCAAC  
CATCGTCCAGC TAAA CTCAGAGCGTACAACCGCAAATAGGATAAA ACGTCT GAAA AACTTTGGAT AACAA  
GCCGTTATCTCATCTAGTCTCTTAATCCCC CAAA GAT TACCC CACC TAAA ATGGCA ACCC CTAAGCCAA  
TAAA CGTTACATAAT ACCCTACCA ACCCTCCTAATTC ATAAGGAAT ATGTAGAGCATAATGAAT TAAA GA  
TACGGCTTGCAAATAGATAGGCAGATACATATATGCTCCGCACA TAAA GATT ACCCATCCTATAGAAGAA  
TACCGCTGTCTACAATAGCGTAGC ATTC CCAATGACAGATGTACT ACCCCCACTAGCAAAGCTA TTTT CA  
T TAAA ATATTATCTA TAAA CTTATCG TAAA CAACGGC TTTA TATACT GAGT CCCCCTACTAGTAC CAAA  
GGCTAGAA GAAA CTC TTTAGGAGT TTTT TTCTC TTTA AGAATAGGAT AATCATGCACCAATTC CTTATAA  
CCC TTAGGACGCTCCTT CAGATAAT ACTCCGC TTTT TCAAAGCCA GAAA ATGTGTTAGT GAATACTCC  
GGAAA GGGCTGGTGTAACTCAC GAAA CGCCAAAAA GGAT GTTGTAGCTCCTCCCAACACACATCC

AAGCCCTAATATCA TAAA CATCTGCA GAAAGCGT TTTA ATGCTATAGAGCGCTTAATCTGTTTC CGAGCT  
TTAAA TGA TAAA AATAATGATGTTGC TAAAAAACTA ATCC ATATCC TGCATTAATAATCATCGAGA  
AAAAAAC GAAA AAGGA GAAA AAG ACCC ATAATGAA GGGTCTTTA TCC GTTGATGCAG GAGTATCA TAAAT  
ATTAACCAAAG ACTC CCCTAATGCTCCAGACCATG ATTC TCT TAAA TATGTAG GAAT CACCTCATCT GGA  
TCAGGCTGC ACCC GTTCTAGA TAAA TGCC TAAA CTATCACAAAG TTTC TTCACTTCATC TAAA CGATCTA  
CAATC ACCCAGCC TAAA GCGC TAAA AACCTTATCATCAAACAGATCTTCTGCACTAGCTTCTGCATGCTG  
TAAA CAAA TTCATTGCATTGTTTCA TAAA GCCTC TAAA AGATCC TCTCGATAAGCATATA ACTC ACAA  
ACTC GAGCCTTCTT TTTACG TAAA AGAGCTTGAAGATGCCCTGCCCTCCTCTCTTA ATTC ATTGACAGAAC  
GCGGCGCCTCTATCTCAG TAAA GAT ATCC TTAGACAGA GAAA CTATCC CAATCACAGCATAGTAATCATA  
GTTGTACGCTGTTGCTAAGTAGAAA AC ATTC TCTTCTTCGACTTC TAAA GGAGCTCCTTCTATATGTCTC  
TTA TAAA AAAATCGAACTGC TAAA CTTGTT TTTA ACGTCAACTC TCGGATTTTC TTC GGATGAAA AATCTC  
CAAGAGGCTTAA ACTC GAACATA TTTCTTTA CCTAGAGCT TTTAAA GACTCTGTAA GAGT TGTAATCTCCTG  
ATTAAGATCAAAGATCTCTTGAAGCAACTGCTCTGTTACCAAATAGCCTGACTTCGTTGATAC TAAA TCT  
GCTGGGGAACAGCTCTTAGTTAGCAGA TTTAAA ACC TTTAATCC CTCA GAAA GC TTTC GTACTT TTTC TG  
AAT CAAA AGTTTA CTT CAAA TAAA AATTC GACAGCCCAATCTCTCGACATGCAGAGA GAAA AATTCAGA  
CTTCTTACGTCCA TAAA TAGATA TTTATCC ACATCTACGCGCATGCAGACT ACTC CTTATGCTGCT GAA  
TTTT TTTC TTAGCCAT TTTC CAAA TCCCACATCAGTAATACTTCTATCACTTAA GAAA ATGGCTATCTT  
TTTA AGAGCAAA CGAAGTTGTAGGTAT GAGT TT TTTC TCGAAA AGG TTTACTCGAATAGAGACTC TCCGA  
AGTTCTTCTTTC TAAA AGCAGCAGTCGTTCTTGAAGC ATTC TCGACA TAAA TCTTACTCACAACATATTCTT  
TTA CAGATGCAAGAAGA GAGT CTAACCAAATAGGTGTATCCAATAAC GAATACTC TGGAGAAGTAAGTAC  
AACCCGC TTTA GTAAGGGGACTTCAACGCCTGCGAT ATTC TCGAC ATCC TTTTC AAGGATATCGACAGAA  
AAACACTGCTCTACTGC ATCC GTATAGAGAG GAAT GCT GAAA AGCTCGGCAAAGCGTAC ATTC TATCTC  
GAGCTTGTTCAATTAGTCGCTGTAC TTTC TGCAGC TAAA CGGAT TGCAGATTGAACCTCGGCCTGTAACAA  
AGC TTTCTTTAAT TTTA ATGTGGGCAAGTACATGCCAACATATTAAGCT CAAATTTTC TCAGCTCTATAT  
GAAT TTTTC GTTAAC TTTACAAA TGAAGACATGC TTTAGGCCAATA TTTCTGAAT TAACTGCTC TTTAAT  
TCCGACTTCTTCAGAAT GAAA AC CAAA AGATAAAA AT TTTC CATCC TAT ATCCAAGCTTCTTCAAGAGGA  
ATATTC ACTTTC TAAA CTCATTAAGCGAGCCTCAAATAATTCAGAAA ACGCTAATAACTT TTTATCC CAAT  
TAGAGAG CAAAAA CCCATAGAC ATCC GCCTCTGCAGAC TTTC TAGAGTCTGCG TAAA GACGAAT CAAAGC  
ACAAA CTAAGTCACCATG ATCC TCTC GAGTCTTCTTACCAATAACCAACTGCTTCAGTCGAGATAATGAG  
CCAAA GGATCT ATTC GATTGTC TTTC AAGTAGAAGTGTCTTCTGTAA TAAA ACCTGTATTGTCAGGAA  
CTGGATGTGTGATATC ATCCCAGGCATCGTAGTCACACTGATCAAAGTAATTG ATCC GCCTTGAGCAAT  
ATCTACAGCTT TTTC ATAACGAACAGCGAGATCG GAATATAAA GACCC TGGATATCC CCTA CAAA CTGGA  
AT CTGGTCCATTGTAATAGCAATCTC TTTC AATGCATCAGCAAAGCTGTTCATATCAGTAAGCAGAACCA  
GGACATT TTTC TGCTGTTCCAATGCAAACGCTCTGCACAAGC TAAA GCCATATCTGGTATCAATACACA  
TTCA ACCGGAGCATCTACGGC TTTA TGGATGAACCTAACACAT TTTA TCAGC GAAA CCTAACCGCTGAGAT  
TCCTCGACGAA GAAA TTGTAATCAACAAATGTTA ATCC ATCC CTCCAATAATTACGATATCTGCATCTG  
CAAA AGCAGCAATACGCATCAACAGCGCATTATGAT TTTC TCCAGAAGAGGA GAAA ATCGGAAT TT CAAA  
AGACAAA ACCAAGCAGTTGAACATATCAATCATCGGTATGTTCTGTTCTGTTACCATCTCTCGAGGCACAATG  
CGACAAAACAGGAT TAAA TGAAGGTGTTGTAATAGGTATAGGCTCACCAAAC ACTC ATCTTCATGATCAA  
TAGGT TTTC CTGTCCAT TAAA ACGTGACCTAACAAA GAGT CTCCA TAAA TGACCTCCAT GGGT CTTC  
TAA GAAA ATCAC CAAA TCTCCTGTAGACA ATCC AGAAGTACCACCGAACACTTGAA GAGTCACT TTTC TC  
GCATC GAAA CGCAAACAGAAGCATACGATGAGCGCCCATCAGCTC TTTC AATCTGCACTAATTCACCTA  
AAGAGGGCGCCTTCTGCCTCCACAGTAATCAAGTCCCCTTGAT ATCC GTAATT CAAA TATATATCG CAAA  
CATACTACGCCGTCTGCACCAT CAAA TTTC TAACAG TTTA TAGATTACTTCCAGGCC TTTC TGATATT  
CTTCAGATAGGAA TTTC TGACCATTCAGCGTCTTAAT TTTA CAAA GAGCTC TAAA AAGAAA CTGCGGGC  
GTTATCTGGACAATC GAAA CAGAAT CTA GAGT TAAA GATGTGATTC ATCAA GAAA AGAGCTCTATCTGC  
CGATCAAATGGACAGTAGCAGTCTCAGCATCAAATGCGT CAAA CTGCAAATAACA GAAATCGTATAGCT  
CTGA TTTC AAAAAGA TTTC CATGTCTTCCATA GAAA TCCCTTCTTCCCCTACGACTTCT ATTC G TTTACC  
AATTTTC AGCACCTTCTCCAAGAAGCGGGAGGCTTG TTTAACAG ATTC TCCCCA ACCCGGAACTTT TTTC  
TC TAAA ATTTTC TGCTACA GAATCC AGATA TTTA GACCAT GAAA TCATT GGGTCAATAGAAGGAT ATCTTC  
TTGCATCTGCACGCGC TTTCGAAA GACCACAGAAA GCTCCAACCACAGATAAAA GTTGTGTTGTAACAGG  
CTCTTC GAAATTC CCTCCTGCAGGC GAAA CTGCTCCACAGATAGTCAAAGATCC TTCCG ACCCATCC TTC  
ATT TTTA CAGCCCCACCTC TTTC ATAGAAGCGGCT ATTC GAGACGC TAAA TAGGCTGG GAAA GCCTCTT

CCCAGGAATTTCTTCTAATCGCCAGAAATCTCTCTTAAAGCCTGTGCCCATCTAGATGTCGAATCAGC  
CAGTAACAAAATGTGCAGACCCATCTGACGGTAATACTCAGCAATTGTAATCCCAAATAAATAGAAGAT  
TCGAGCAGCTACAGGCATGGAAGATGTATTACAAATAATACAAGTTCTGTGCATCAAAGACTGCCCTG  
TATGAGGGTCAAAGATGAGGGAATCTCTGTAAGAATTTCTACAACCTCCCCGCACGCTCTCCACAAGC  
ACACAAACTACAATGTCTACAGCAGCATACAAAGATAAATGGTGTGCAATACCGTTTCCAGCTCCA  
AAAGGTCCAGGAGTACAGAACGTTCCCTCCCTAAGAACCAGAAACAAATGTATCTAACACTCGCAACCCTA  
CATCCATGATCTCGTGAGAAGGAACTTTCTCCCCCTTCAAATAAGCTTGCTTGATAGGCCATTTCTGAAC  
CATAGTGAATCAAGCTCTTACCTGTTGAAGTACGTCCCTTAGCAACAACGGTATCGACAGTATAATTC  
CCAGAAGAAATCACCCATGTGATGGTACTTCTCAAACAAGAAGAAAGGCACCATAATCTTGTGATCAA  
AACGACCTTCTTTTACCGTTCCAAGTACATCTCCTCGAAGAAAGTACAGATCCATCCGAAGCTTCAAAGCT  
ATAAGCCATACTGTTCTCGACAAATGGCATTAACTGATTCGCCTCTTCTCAAAAATAGGCTTGTATCT  
GCCAATAATTTCAAGCGATTTCTGTAACCCATCAAAAATTCCTTGAGTAAACCGGGCCCTAATTCAGCTT  
CTAAATAATGTCCGAAAGATTACCAAAGCGCCACGAGAAATTCCTTGAGTCTCCTCAAAAATTTGGAT  
CTTAACCTCATCCCTACGACTTCAATAATTTCTGCTTTTCAACCAAGTATTGTCTACGCTAACATAGGCC  
ACTTCTCCCTGACGCACATGCCCATCAACATGCACCCGCAATAAATTCCTCGTAAGCTTCTACGACATAGC  
CCTGCGTCGCAAAATCAAAGTTGCTACCATCTGATTCCTTCTCCATCAAATTAATCAGTTCCTTCCC  
TTCTGAACACTCGCCCACTACTACGAATGGCCATTAATATGTAGTTACCCGAGAAAGAAATGCATCTG  
TGTAAAGTACAAATCTCGTGACATCTCTTCTACCTTATGAAATTCATAGAAAAGAGAGTCTGATTCAA  
CATGTGTGGAAGACGCCGTAATCTCCAAAACATCTCTCAATTCGAAGAATTCATCAGGAAGCTCATAA  
TTAGGAGAACTTCAAACATCAACACATGCAAGACAATGGGATTCGAATATCTTCTATCCCTAAGGACAA  
AAGACACATCTTTCTGCATTACTCTAGCTCGAAACCCGCCAAAATAATTCGTAATCTTGTCTAAAGCG  
AAAATAGGTTCTAAGAAATTCGAAAGGATAATCTTGATAGTGATCGAGAAAATCTCTAACTAACTCTGAG  
AAATGCGTAAAGCTCTCGAGGAGTTTATAGCGCAACAGAAAATCTTTAAATAAGTCTTCAAATCCC  
ACTCATCCGACCACACAAAGCCGCAACAAGACTCCACATTACTACAAATAACGGTCCCAAAAAGAAA  
GGGAATCGATTTCTCCTGCCAGAAAAGCAAAATTTTCTAAATCAAAAAACCGCGCAATATTACGTAG  
GACCGCAATCTTATCTGTAAAGTTAGCGCTAATAATCATTGATTTCTTGAAATGAATAGAGAGGAG  
AAGATTCGGGTGTTGAGGAGAAAAGGAGGAGGATAAAAATAATACTGATTCATAACGCGCTCTTACAC  
CTTCAACTAAGAACTCTCTAGAAAATCCTCCAGAGATAGTTCTTCTTTCTCAACGCATACAAAAAGC  
TCCGCGAACTCGGAGCTTCTATCGTCAACGAATTTCCCAATAACGATTTTAAACAACATAGCCCCTTAAG  
CCAAAGATCCTTTAGCAAGACTGAAAGATCATTTCCGAAATCTTTCTGTAAAATCTAGTCAAATAAT  
CTAGCAAAACCTCTGAGCTCATATCTAAAACCCAAATGCGCTCTTCAACTTTTAACTGAGCACCTCCAGA  
GAACTTGCCAACAGATACCCCTTCTCAAAGTTTGAAGTTATCTCTTTCCCTAAAGCCTCATGACA  
GCTCGAGCTGACACATGTTTCTTATATAGGCAGAAAGATTCCTAGAAATCCCTGCGCATCAACTGCCT  
GTACTAAAGCTTGACAGGCTTAGCGCTGACTTCTGGATCTGTAGCCACATGATCTAACCATTACCCAA  
AGACTCTCTGAAGATCTTCGTTTCTACTGCCTGCTTCAAGTTTCTAAAGAACGCCTTCTGCCTGTACC  
AAAGCCGCTCTCCTTTTCTCAGAGCAAAGTCAGCTGTCTCTCCGAGAACGAATAATCCCAAAGCCT  
CTTCTTGGCCTCCTCAACAATACGTCAAACCTTGCTCTCTTGCAATATGAACAATAGAACCGGCTTCTC  
TTCAGCTGGTTTTAAAGTTTCTCTCGCAAAGCATCACATAAACTTTAATTTATCTTGAGCGCTGAGA  
TCTGCCATATCTGATACCAAGAAAACAACGTTTATCTTAAAAAACGATCGATTATGATCCGGTTAACC  
CTTAAGATTAGATCATAACAACGTTTAAATCAAACATAAACTTATGAAAAGAGTATCTCTGCTCT  
CTTTACAAACAAGTTTCTCCTATAGTTTCTGAAGGCAGCCGAGAAAGGAAAGCCTCTTTCTAGAGCTGCTC  
AATTACGAGAGAAAAGAAAGATCTCCATGTATCAAGGAAACCTCTCCTCGTTATGCACAAAAAAACG  
TGCPTTAGAAGCTAAAATAAATAGGCCTTCTATTAGCTGGATAACCTATTCCAATGCTACCTATTCTTT  
CTTATCCCTAATACTTGGCAATGCATCGATGATAACGCAGCTACCGAAAATAATAGATGTTCTTTTCA  
TTGAAAGGGAGCAGGAGGACTGACGCCAACAATCAACAGCGCACACGAAATCATCCATAAACTGAAGA  
TGCCATATTGAGGAGATTTTGAATATCATCGCGCAATGAGAATACACTGGAATCTTCTATCCAAAGC  
CACATTCAGCTCCAGTGGCAAAPTTACAATTATCAAACGAAAATAACACCTCTTGGGGACGAGTCT  
CAAACTCCAAGGTGTGACAGTCATTGATCACACAGCCTACATCCCTTACAAGCACGTCTACCATAGATGA  
CTATCCCAACGTCTCTTAGCTCTTCAAAGCAGCCTCCTCCPTTAAAGCTCTCAAAAAGGAAGAAGCT  
GCTCGTGGTGATGCTATTTAGAAAAGCAAAAAAGATCTGCAAAATGAAAATAGCGGAACGCTATCC  
TCTATGATACAAGACTTCTCCTCGCAAGAAATGAATGAATAAATCTACTCGACAAGTTTACCCGCTAGA  
TTCAAATTCAAAAAACAGGGAATCGAAGAAATAGCAGCTGAAAAGGAACGTCAATACAAAAGCCTTGAA  
CAGAGACCGAGACCGGGCTCACCGAGGAGGGCTTAGCTTCAATAATTCATAAACAAAGAGCAGAGAA

TCGTCTAATAGCATCACACATCTCAGCATCAAACA TAAATGAAGCTTCGCAGCAATCACACACAAGACAA  
T TTTCTAAATCAATTACA GAAA AAGCTACGTTCCCATCACAACAATACGGACAA GAAA AACATAACGCCT  
GTTCCTTTT TTTTCATGAC ATCC TTTTATTC AACACTGCCCCACATTATCAATA TAAA ACTATGCTTCC  
TGGGCTGCGATCTGTCTAA TAAA TTC GGTA ACTGCAG ACTC TAAA ACAAAGT GTCACCA GAAA AGATGC  
GAATACCTTCAGCTAGCTTCTCTGTTGCCATGGCATCTTCATTCATTAAGAACC GAAA TAC ACTC TCTGA  
CAACTC CACAGGTT GAAT ATCTAATTT TTTTCGTTCTTCCACGTAAGC TTTCTTTC AACAGGCTGCTGA  
TC TTTCTT GAGT TCTTCTAATAA TTTA GGAGAAA CCGT TAAAAAATCAC ATCCGGC TAAAGCAAGCACTT  
GCTC TTTCTGTC TAAA AGAAGCCGCCATAATCT GAGT TGAATATCAA TTTCTTATAGTAA GAAT AGAT  
A CAAA CTACGGAAGCA ACTCCAGGAT CGGCTTCGATA GAATACCC TTCTGCGCCATAAGCAGCG ATCC AC  
CAATCA TAAATCC GACCAACAAAAGGTGAGACCAATGTTAC TTTAGCT CAAA CTGCTGCGATCGCTTGCA  
CAAGAT TAAAAAT TAAA GTCACGTTACAAGCA ATCC CTTGAC TTTCTAAA ACCTCTGCAGCACAGATACC  
TTCCAAGTCCCAG GAAT TTTA ACTAACAACG TTTCTTATCTCCTCCCAT TTTCTCAAATAGTTGAGAC  
AAAAAATCGCTCGCTGAACCATGCTTCTGTAT TAAA GAAA GCCGGGCATCAA TTTCTAATGAT ACCC  
GACCAGGAACATGC TTTAGAAT CTCCAAGCC TAAA TTAAC TTGGAT CTTATC TAAA ACAAAGTCAGAGC  
AAA AACATCATCACC ATTC TGCC GGAT GCCCAA GAAA TGGCTTCCGTCAGCATCGACTGGTACTTAGGC  
TCTTGAGCAACCTTCAAGATCAAAGAAGGACAAA TCGTAGCATCC TGA ACCCCTAACGTTTGAT TAAAG  
CGGGAT CTCCAGTATCTCCAACAAGAAC ACTCCAAAGCT TAAA CTGATCGAACTGGCTAGACA TAAA CAC  
CTTGTC AATT CAAA ACTC TAAGTGAAGCCTACCAAAAAAACGATACT ATTC AAGGGGGT TATGACTCAT  
ACCC CTTCTCT TTTCTCTAGTT CAAA GGCAGATC TTTA ACCTGCCACAGACTC AAAC TCGCTGTCAAAT  
CAAAGACCAAGTCTTCTTGCTCTT TTTCAAGATGTTGCTTAATACGCTTGTGCGTATCAAATCC TGTACC  
TCCAG GAAT CATATGTCCCATGATCAC ATTC TC CAAA AATCC TAACAGATAGTCTGTCTTACTGCTGCAA  
GCAGGCTCTGTTAAG ACCCGAGT CGTATCTTGAACGAAGCAGCA GAAATAAA GGACTCAGTTCCCAAAG  
AAGC TTTAGTGATTC CCAACAGCACTGGAACAGCTTGAAGCAGG TTTCCCTCCATCTTCTTCCGTGCGACG  
GTTCTCTTCATAGA ACTCTTTTC TTATCGACATCTTCTCCAACAATAACGTCGTATCACCTGGAT CAGTA  
ATGCGAAC TTTCTGCAACATCTGACGAACAATAA TTTCGATGTG CAAA TCGTTAATGTCT ACCCCTTGTA  
GGCGGTATACTTCTTGAACCTCATTAACTAAAATA TTTCTGAAGCTCTCTAACACCACAAATCGCAA GGAT  
CTCATGTGGAACAAC TAAACC ATCC GTCAACTGCTGACC CAAA ATTACGCTATCGCCTCGTTGTACGATT  
AAGTG CAAA GTTAGAAAATCAAATGTTCTCTTCC ATTC CCGTAATCTCATCTCGACAACAAGAATAC  
GCTTGTCTTCTT GAATGCC CAAA AAGTCAACA ACCC CATCAATCTTAGCGATATCAGCAGCATCTT CAGG  
CTTACGAGCTTCTACTA ACTC GGCA ACCC TTGGCAAACCTCCAGTAATATC TTTA GTCTTGATAGCCCT  
CGAGGCAATCTCGCTAAGAGC ATTC CTGGAGCGATACGTTGACCTTCTTCTACGGAGATAATTGCTCCAG  
AAG GAAT AGCATACTACCGACCA ACTC TTTCAATTTGGCATCAGCATATATAGCGATCTGAGGAT GTAA  
TTCC CTTCTGTGCTGT TTTACGATTA ACTCAACAAGCCAGT ATTC TTATTC GCGACCTTCTGTGAGG  
ACTC CTTCTACCAAATCTTCTGTAATGAAC GAATCC TGGCTTATCACAGATAATTG GGATGTTATGAAGCT  
CTACCTCAGCA ATTC TCTGTCCCGCTGTAACAGCAGCACCATCATTAAC TAAA ATCTTAGCTCCTA ATTC  
CACAGG GAAT GTTGCCAGAC TTTCAATAGACTTCGT ACTCAA GAG TTTCTTATATTC ACTTAAGCTTCGT  
CCTTCGTCTTGAAC TAAGTGAAGAGCTCCCATCTTGTTAAGCACAAGATTATT ACCC TCTTGGTCTACGA  
CAACACGCAAGTCTAGG TAAA CAA GAATCC CATCGC ACTCAGCAACGATCTCTG GAGT TGA GGAT GTCGC  
AGCA ACCC CCAAAGGTGGAACGTTCTCATTGTTAACT GAGT TCCAGGTTCCCAAT GGAT TGAGCTGCG  
ATAATACCAACGGCTTCTCCTA ATCC AATCAAATGACCGTTAGCGAG ATTC AAACCGTAGCA TTTA GCAC  
AT ACTC CTCGACGAC TTTCAACAAGTAA GAGT GGAAC GAATCTTACAC TTTCAATACCAGCGTCATCAAT  
AGCTTCAGCTTGAGCAGAAGTTAATACATCGCCAGCATATGCTAAGACGTTGCTCTTATCACCAGGCTGA  
TAAA TGT TTTCTG GAAA CCGTACGTCCG TAAA CACGATCT TTTA GAGGCAACAGTTCTTCAGA ACCC TGAC  
GGAT TGTCGACACCTCGATATGA TTTAAA GTACCACAATCTCTCTCAGTAATAATGAC ATCC TGAGCGAC  
GTCTAC TAAACGAC GAGTCAAAT ACCCGGAATCC GCTGT TTTA AGCGGGTATCTGCCAATCC CTTCTA  
GCTCCGTGAGAA GAAA TAGAGTACTC TAGAACAGT TAAA CCTTCTCGGAAGTTCGAAGTAATCGGAGATT  
CAATAATGGCTCCG CAAAG TTTA GCCATTAGTCCCCG TAAA GCACCTA ACTGT TTTA ACTGAGA TTTATT  
TCCTCGAGCTCCAG AAT CAACCATCAA GAATAGC GGAT TATG CAAA CTA CAAA CAAATTTCTT GATCTCA  
GAGTACAAAGCATTAGACAAGAGGCTGAGACTTCAGTCCAAATAC TGATCGT CAAA GAAT GCCGTTCC  
CATCAGTAATAATTC CGTCTCTGACTG TTTCTTAA CAATAGCAACCTTGTGTAAGCATCT TTTAAGAT  
TTCTTTCTTGAT TTTCAAGGAATCTTAAC ATCC TTCAG ACCCATA GAAA TCGCAGC TTTCTGATATTGTACA  
AAGCCTAATTC TTTAAGATCGTCTAGGAAGCGTACAGTAGCTTCTAACCCAAC TTTCTTATAGCACTGCA  
GAAT CAATTC ACTGATACGCTTACTTGGCATGCTATAGT CAAAGAAA CCAAGTTC TTTAGGAACGATCGT

ATTGAAA AATACACGACCAGGTGTTGTTTCAATAATCTGACCATCTATTCGAACTTTAATTTTC TCATGG  
ATGTGAATCCCTCGTCCAGTTTCATCTCGACGAGAACCACAGATCTCATCC TTCAGAA TAAA CCC TCCAG  
CATT CAGAGCTCGAAGCACTTCTACTTCGTC TTTAAA TGCT CAAA TTTCCCTCCATGTTCTTCAGGGAA  
GTAGGTTGGATCAGCCAT TAAA TAATAGAT ACCC AATGTCAT ATCC TTAGAAG GAGT TGCAACAGGTTTC  
CCAGAAGATGGCAA GAAA ATGTTGTC TGGAGCCATCATCAAGACCTTAGCTTCTA ACTGCGCCTCGATAG  
AGAGCGGCACGTGAACAGCCA CAAA GTCTCCATCAAAGTCGGCGTT GAATGCTGCACATAACCAGA GGATG  
GACCCGAATAGCCTTCCCTTCAATCAATACTGGCTCAAAGCCTGTATTCCTAATCGGTGCAAAGTAGGC  
GCTCGGTTTAG TAAA ACT GGATGCC TTTAATTA TTTC TTCAAGAAC ATCC CAAACTTCAGGAGCTCCCC  
GCTGAATCATCTTCTTCGCTGAAC GAATAGTA TAAA CACT ACCC TGATC TTTC AATCG CAAAATAA TAAA  
TGGCTCAAACA ATTC CAGCGCCA TTTC CTTAGGCAAACCGCACTGAT TAAATTTCAATTCAGGGCCAACA  
ATAATCACTGAACGTCCG GAGTAA TCCACTCG TTTA CCTAACAAAT CAAATCG GAAA CGCCCGTT TTTCC  
C TTTCAACATCTCTGACAAAGACTTCAGAGGTCTATTGCCAGCTCCATAACA GGATGTCCGTGACGTCC  
ATTGTCAAACAGAGCGTCAACAGCTTCTGCAAC ATCC GCTTCTCATTGCGGACAATGACCTCAG GAGTT  
TTTAGCCG TAAA ATAGCT TTTAAGCGATT ATTC CGGTTAATAA ACCC TACGATACAGATCATTTAAGTCTG  
AAGTAGCAAACGCCACCATC TAAA GGAAC TAAA GGACG TAAA TCTGGGGGAACAACAGGGATGTTCTT  
CAATACC ATCCATTCAGGACGGTTCGAAGAAGATACAAAACCTTCTACGATCTTCAGACGTTTAGCAAGC  
TTC ATTC TCGCTTGCTGAGATTTTC GTT TTTCT TAAA CGATC TTTAAGCTCTCC TAAA AGGC TTTC CAAAT  
CTTCAGA CAAAAGAAGATCATAAA CAGCCTCTCTCCCAT CAAAGCAAC GAAA GCATC TTTACCC CATT  
TTCAACAAC TTTCTCGATA TTTTC GCATCATTGAGAAGTTG TTTTC TTCACGAGATCAGTATTACCTGGATCG  
ATAACAACATATTC TTCGTAATAA TTACACGCTCCAAGTCCGAAGCGGTC ATTC TAAAACATTTCCGA  
TTCTTGAAGGAGTTGT CAAAAGAACCATATGTGAACAATAGGAACAGCTAACTCAATATGAGCCATTCT  
TTCTCGTGCAC TTTAGAAA GTGTGACCTCTACTC CACAGCGGTCACATACAATTC TTTATG CAAAATC  
TTCTTATA TTTA CCGCAATAAC ATTC CCAGTCTTAGTAGGCCCAAATCT TTTTC GCAGAATAA CCGC  
CTT TTTCCAGG TTTAAA TGTACGGTAGTTGATCGTCTCCGG TTTTC TTA TTTTC GCCACAAGACCACTTGT  
GCGAATAGTCACATCTGAAGCA ATCC CAATTTTC TAACTTATCAAACAGCCCTTCT TTTACCAGGGCTGCA  
TCGCTCGAGAACCTTCTCTGAACATTAAC TTTCTTTA ATCAAACATTTGAACGACTCAGGCGTTCAGAACG  
AAGTAAGT TTTTC TCC TTTAACGATCG ATTCGTAGATAC GAGT TCTTCCC GAAA CATCGTCGGACTTAACA  
GTTAGGATCTCTTGCAACATATGAGCT ACCC CATAAGCTTCTAAGGCCATACTCCA TTTTC CCC GAATC  
TCTGTCTCCCATCTGCGC TTTA CCTCCAAGAGGTTGCTGCGTAACGAGAGAGT AAGGTCTATAGAACG  
AGCGTGGATCTTATCAGCAATTAGGTG ACTCAA TTTCAACATGTAGATGTATCCAACGACCAC CAAA CTA  
TC GAAA CGTCTCCGGT TTTA CCATCAAATAGATAAGACTTACCATCTTCAGGCA ATCCCTGCTCTATCA  
TCAT ATCC CAAATACGGGACTCTG GAAA CCC TCAAAGACCG GAGT TTTTC ACATAGATACCTGCGGTT CA  
AA CAGCAT ATCC TAAA TGTGTCTC TAAA ACCTGTCCAAGGTTCA TTC GAGAAGGC ACCCCTAAC GGGTTC  
AAAATCATCTGTACTG TTTCCACCGTTAGCTAA GAAA GGCATGTCTGCTTCTGGAACAATCTTG GAAA CCA  
CTC CCTTG TTTCCGTGACGTCCAGCCAT TTTA TCC CCAACTTGAAGT TTTTC GCTTGAAGCCACG TAAAC  
TTTA ACTTGTG GAT ACTC CATGATCTAAGTCAGCATCACCTTCT TTTA TGTGCTCAGCTTCGGT TTTA  
TAATGACTTCAAACGCTGAACAGCTG TTTCATAGCTA GAAA GAAT ATC TTTCAAACATCATA CATGT  
CACAAGGAGCAATCAGCAAATCAACTAGCGACTC TC TTTCTAA GAGT TCGATAGTCTCTTGATCAAAAAT  
AGCACCTTCTTGAACCAAATATCTGCCGAACGACGGTGTACAATCGCTGCAGGAGCTT TTTCAATTGAGC  
AATAGAGCCCCTAG TTTCTCTCTATGTTCTAC TTTCAATTGAGCCAACTG ACTC TTAT ATTC TTTCTGTA  
GATCC TTAAGATGCACAGCTTCTTCAACCAGTTCATCATCGCTCTTGACAAGCGATCC TTTCTGCT GAA  
TAC CAAA AC ATCC ATTACG ACTC CTTCTGTACCAGGAGGAACCGTTAGAGAGGCATCT TTTA CGTCCGCC  
GCCTTCTCTCAAAAATAGCTCGCAACAACGCTCTTTCAGGAGCTAGTTCGGTCTCAGATTTTC GGAGTGA  
T TTTA CCGACAAGAAT ATCTCCCGCTTGACTTCAGCTCCAATACGGACGATAACCCTCTCCGAGACA  
AACCAAACCTCTTCA GAAACGTTAG GAATATCTCTAGTAA TTTCTTC TTTA CC GAGT CAAA TATCTCGA  
GCTGTTA ACTCAAATTC TTCTATG TAAA TAGAAGTGTACGCATCTTG TTTAATCAACCTCTCGGAGATGA  
TAATCGCATCTTGAAGTTAT ACCCGTACCAAGGCATGAAGGCCACTAATACGTT TTTACCAAGAGCCAA  
TTCCCT TTTATCGGTTGCTGGGCC ATCC GC TAAA ACATCTCCATGCGTAACCACATCTCCACAGAACAC  
AAAG GAG CAAA GTTGTGATGCATGTTCCG GAGTTGGAT CTTAAGAAT TT TTTAAGCTGATAACGATCC TTA  
GCGTTGGATTATTC TTCTTCGCTACGACAATCTCATAGCTATCTACGTATTCGACT ACCCCATCTTCTG  
AGCCACAATAATAGCTCCA GAATC CAAA GCAGCACGTCTTCTAATCCAGTTCCAACAATAGCAGCTTCC  
GT TTTCAATAATGGTACAGCCTGCCGTTGCATGTTCG ATCC CATAAGAGCTCGGTTAGCATCGTCTGTT

CCAA GAAAGGAAT CAGCCCCGTAACCACAGATACCAGCTGT CAAA GA GAAA CGTCCATATGCGTAACCGT  
ACTTGTGTGGCTTCAAAGCCTCTCC CAAA TATCTAGCCAGCATA CAGGAGT TTTAAACATATTTAT AC  
TCATCGAGCTCCGCAGAAGCCTGAGCAATGACAC ACTC TTCTTCAACATCTGCTGTCATAT ACTCAA TTT  
CATCTGTCACGATGCCATCGCGCACGACACGATAAG GAGTCTCTAT GAATCCAAATTC ATTGATCTTAGC  
AAAGGAAGATAGTGAAGTAATCA ACCCAATG CAAA GTCCTTCAG GAGTCTCAATTGGACAAATTC TACCA  
TAGTGGCTTGGGTGAACGCTCTCGAACTTCAA ACCC AGCTCTTTTC TCTATTCAATCC CCCAGGTCC TAATG  
CTGACAGACGACGCTTGTGCGTCAATTC TGCACAGGG CAAA TCTGATCCA TAAA CTGAGATAAATTGAGA  
ACGGCTGAA GAAA TC TTTTCAGGACACTGACTA ACCC TTTAGCAGAAA TAATC TTTTC CTG GAGTTA GGGTA  
TCAGAAGA GAAA TCAAAGAGATTCATTC TTTTC TCGAACGATCT TTTTC CATTCTAGCCA ATCCAGAACGAC  
AGTGATTC GAAT TAGTTCTCCAACAGAGCGAA ACTC GTCGG CAAA CCAATGGTCAATATCATCGATAGA  
TGCTTTCTCATCGCCC ATTCGCAAAC GAATCAAATA TTTTC AACGCGCCGATAACATCTTCT TTTTC TCAA  
GTCACTTGAGATAATG TTTTCGTGCTAATGGGAAGCCTAATTT TTTATTTA TTTTA TAACGTCCAACGC  
GGCC TAAA TTATAACG TTTTAGCATCGAA GAATAAA CGCATAAATTGT GGATCGAGCATTAGC TAAA GTTGC  
AGGCTCTCCTGGTCGTAATCTGCGA TAAAAATC TTTAAGAGCAGCTTCGTAA GAATCCGTAGGAT CT CAA  
ACGAGCATCTTAATAAATT GGGT GAT TTTTCATCTGCGCCAACAGCAATCTTCAAAGATTGGACTCCCGTAT  
CTAAGATGCGT TTTA GCATAGCAGTACTTAGCTTCTCTCCAGC TTTTC CCG TAAA CTAATGAAGAATCCGC  
ATCAACTACGTTATCAGC TAAAAC TTTA CCAACTAACGCGACAAAATCCTTCTCTGAACGTAAGGAACGC  
TCCTCTACAGAAA AGA ACTCTTCAATAATATCTGCATCTGTT GAATATCC TAAA GCTCGGATAAAA CGTCA  
TAGC TAAAATC TTTTC TGCACGTTTT TTTTC CTATCAATAT GGATATAGATAAGGTCATTAATGTCGAAGAC  
AGCTTCTAACCAACTTCTCGATAAG GAATAATTC TAAAAGAAAA TAAAACAT TTTTC TTTAGAAT GTTT  
TC TTGTTCAA AATTG ATTCCTGGAGAACGGTGGACTTGAGAAA CAACGACTC TCTCTGCCCATTAATAA  
TAAA AGTTCCCTTATCAGTCATGATGGGGAT GGTTC CATATAGACTTCTTCTTC TTTAATCC CCG TTTTC  
ATCAGT TAAACG GAAA CGAACCT TTTAAGTAACACTATAGGTG ATTC CCGAC GAATACACTC TTCTGGG  
GAGTACAAAGGC ACTC CTAAGTTATAAGAGAGGT ACTCTAAAATCGTAGCTTCATTATAAGACTTGATAG  
GGAAAAT TTTTC TCTGAAGACTTCTTC TAAA CCAATGT TTTTC TCGCTCTTCAGCAAGCTTCCCGACAAAAG  
AAA CTGCTTATACGACTTGAC CAAA AACTTCGACAAGATTAGGAAGATC TAAAATATCTTCTTTTC TT CAAA  
ACGCTG ACCC GCTCCGGGC ACTTGAACATGCGAGCTCTCCTAAGAC TTTAAGACT CAAAGCGATACCATT  
TC CCTA TTTA GTCCCTCTGTGATCTC TAAA CAG GAATACGACAGATGC TTTTC CAGCTAGGACAAAACAGA  
GCCT ATCCAATACAGAGACACT GGATACTCCTATACACTTGTCC ATCCGACAAAATACTATCACCTTGAT  
TC CATTAA GAAA AAACCATTGCAACA GAAATATTC TG CAAA CGATGCCAAACAC TAAA AGTTAAGTCCAG  
ACAAATCTGTTAAGACGTACCGGGA ACCCCTCTGTGCCAGCTACTGTGCAGC TAAA C GAAAAGAGAAGC  
TTGCAAGTA ACCC CCAAAGC ATTC TC TTTTC CATAACAATTACAGCCC TTTA GCAACAGCCTTAGCACCG  
GCTTCTTGTA ACTTCTTAACAGTGTCTTCTGCATCACT TTTA GAAGTTTT TTTCTTTA ACCGCTTAGGTA  
ATCC TTCAGTCA TTTCTTTA GCTTC TTTCAAAGCTA ATCCAGTA ACTTCTCTAACAAC TTTTC AGA ACCCC  
GAT TTTCTTATCAGAAGGAACGCTTCCAGAAT TACAGCAA ACTC TGTAGGCTCTGCAGAAGCAGGAGCA  
TCACCAGCGG CAGCAGCACCAGCAACAGCTACTACAGGAGCGGCAGCAGTAACGTCCC ACT TTTTC TTCCA  
ATAATTT TTTAAGCTGAGACA ATTC AAGCACCGTCAAGCCGCTCAACTGTTCTAC TAAA GTTTTC CAAACT  
TTCTGTTGTAC CAAA TC ACCCTTATTT TTTA GAAT GTTAACACT ACTCTT GAGT TTTTC TGC TTTTC TG  
GTCGACACAAGAAA CAACACCA GAAA GAACT GAATTC ATAATTC CTACA ACTTGAGACATAGGAGCAGCA  
AT GAGT CCAACA ACTTGCTGTCTAAGCTC TTTTC ATAGAAGGCAA TTTA GCAACGGCCTCAACTTCTCGCC  
CAGACAAAGAAGCATTATCT ATTC TTCCAGCTA GAAA AACTAGA GAAT CATTATGCTG TTTA TT GAAA TC  
TAACACTTGCTTCGCAGCAGATACT GGATCGCCATAGGC GAATACA ACCCAAGATGACCTTCGCTGTCT  
TCT GGATCCAT TTTTC TACGCCAGAAGTCTC TAAA GC TTTA AAAAAATATTT TTTCTTTA AACTTCAA ACT  
CAGCAGAG ACCC CG GAAA GATTA TTTCTAAA ACTTCTA GAAT GCGTAGCAG TAAA ACCCAGGTATCTCAA  
CAAAA TAAA ACCTTGAGAAGCGGTATCT TTTTC TTCAACCTCGGAAGCAGCAACTT TTTTC TCTTC TTTTC  
ATT TTTTC CTC TTTAAA CTAGAAT TATAACGCAATCA ACTC CCTAGT ATCCACGGTA ACCC CTGGCCCCA  
TGGTCGAG GAAA TAGT GAAATTAAC TAAA TATTGTCC TTTA GCAGTTGCGGGCTTAGC TTTA ACTAAGGC  
TGCACACAACGCTTCAACAT TTTCCAAA CAAA CGCACTATC GAAA GAAA GCTTCGCA ACTCCGACGTTG  
CATAACCAGCTCGATCAGC TTTAAA TTTCAAT TTTA CCT TTTTC GCAGTTCCGCAATAGT TTTA ACCCAT  
CTGTTGTTACAGTTCCGGC TTTA GGGCTAGGCATAAGG TTTTC TTGGACC TAAA ACT TTTTC TAGC TTTTC  
GACCTCTCTCATCATATCGGG GAGT GGCAACCGCAACATCGAAGTCA ACCCATCC ACC CAAA ATTT TTTCT  
ACCAAGTCGTGCTACCAACAAAGTCCGCTCCTGCTTCAATAGCCTCTGCAGCCTTATCTCCAGCAGCAA  
AAAC TAAA ATTC GCAAAC TTTA CCTGTACCGTGAGG TAAAGAAA CCGAACCAC GAA CAAA CTGATC ACT

CTTTC TTGGATCGATCCCTAA TTTA ACAGACACATCAACCG CAAA ATC GAAA CGCACAGTAGGACACTGT  
TTTAAA ATATCTATCGCTT ACCC AAA GAAT AC GACTTAGC TAAA TCGTAAGTCTCTT GGAT ACCAC GAA  
TGGGT TTTTC CATGC CAAATCATAATTATGCAGCTC TTTA ACTAATT ACTC TACATCTAC ACCC ATGCTTC  
GGCAGTCCCTTCAACC ATTC TCTCGGCGG ACTC TAAA AGAACGAC ATCC ATGTCCTTCATCT CAAA CTC  
AGCAAT TGCCGTAA CAAATGCTC GAGT TAA TTTA CCAAC CAAAT TTT C TATTAG GAAT CT TAG ATCC AGAT  
TCCAAGCCCAAAGCTTT TTTA ATTAACGAA GAAA CAGGAGACTG TTT C ATTACAAA GAAAAAGTCTT AT  
CCGAGT ATACAGTGATTACAACAGGGAGCAAATCACCTGGACGGTCTT GAGT TGCCGCAT TAAA CTC CAA  
ACAGAATCC CATGAT ATTC AC GCTGCAGCACC TAAA GCAGGACCAATTGGTGGAGCG GGGT TAGC TTT C  
CCTCCAGGGA CAAA CAA TTTA ATGAT TTTA ATGAT TTT TTTA TTC GACAT ATTC AACCC TACTC TACCTT  
AGT ATTC CTCTCAAAACGAGGGG GAAA AAC GAAA AAGT TAAA TTATAAGAACATAG GAAT AAGAAT ACA  
CAGAA TTTCTT ATTC TTA ACTC AC TTT C TTGCCCTGGCAGACTTCTCTACCTGCCAGA ACTC TAAA TCA  
TCGACGC GAGT CTCTCTTCCAAAGATA GAAA CCATAACGCTAAGCCGCC CAAA TCGTGGAACACTTCCG  
ACACA ACCC CAACAAAGTTAACAAACACGCCGTCATTAAT TTTA ACCTGAGATCC CACTTCAAACCTTATG  
TT CAAA AACAACCC CAGATTT TTT C TCTTCTAGATCTGC TAAA ATATTT TTT ATTT C TTCTTCAGACAGA  
GCAACGGGAGCGCTCCCC TAAA AATTC AACTAC ACCC TGCGTCTTCTTTCACATAAGACCAAG ATTC AT  
CTGT TAAA TGCATCTTGACTAAGAGGTAGCCTGGCCAAATATACTTCTCAACGATCTTATGTT CACC TTT  
CTT CACTTCCATAAC ATTC TCGGAAGGCAGGAT GATCTGCT GAA TAAA ATCAGAC ATCCCTGAGGCTTCT  
TTAAA ATCTTC TAAA GACTTT TTTA C TTTCT TTT C TTGAGCCG TAAA AACTTGGACGACATACCACT TAA  
ACAT GAAT CAACCAAA GAAA AAGCTTGTTACTTACCTAACAAT GAAA GGGAC TTT C GAAGAGC TAAATC  
CACACAATAGATG GAAA ATCC AAAAGCCAAAAT ATTC ATCAAAA CAATCTTGACGTATCT TTTA AGATCT  
CGCTTA TTT ACCCACTCAATCTTCTTAA TTT C TTCGA TAAA GCT ACCC GCAAAAAGCTGCTTGT TTT CAAA  
CAAAAGATACT TTT C TTAAGAAA TTT C TTCGGTGATCTTGCCCATAAGCGAATTC TTC TTT C AGTTACC  
TAATAC GAGT GCGGAG GGATTC GAACCC CCGACCGCGGC CAAA GAGGCCACTGCTCTACCATCTAAGCT  
ACAC ACCC AAAGGCAAGGCT TTT C AGCCTCGCCAACATATCACTTAA TTTA TGCAATGATCTTA GAAA TA  
GTTCCAGCACCGATTGTACGACCACCTTAC GAAT CGCAAATCTCATACCTTCTTC TAAA GCCACAGGGC  
TAATCAACTGCACTTCAA ACTC AACGTT ATCC CAGGCATGACCATCTCAACTC CCTCAGGCAGAGT TAC  
CACACCTGTAACGTCTGTTGTACGGAAGAAGAAT TGAGGTCTAT ATCC TGTGAAGAAA GGCTTATGTCTG  
CCACCTTCTTCTT CAAA CAGAACG TAAA CAGCACACT TAAA CCGTGTATGAGG TTTA AC ACTG CAAA GCA  
AGCAAACAACC ATTC CTC TTT C CACATCGTCTTACCAATACCTCTGAGGAGCAATCC AAC ATTC TCTCC  
TGCACGACCTTCTGG GAGT TCT TTT C TGAACAT TTT C AACCC CAGTAACAATCG TTT C TTTA GTATCTCTA  
AGACCGACCAACTGAAC TTTA TCG GAAAC TTTA ACA ATTC CACGCTCAATACGTCAGTTACTACAGTTC  
CTCGTCCGGAGATAGAGAACACGTCTCAATGGGCATTAAGAAA GGCTTGTCAA TTT C TCTTT C TG GAGT  
AG GGAT ATTATCATCGACGGCTTGCAATTAGCTCTCGAAC TTT C TCTATGTATGCAGC ATCC CCTTCCAAA  
GC TTT C AGAGCAGAACCTCTGATGATTGGAC ACCC CAAATATCC TTT C TCTCAAGAAGCTCAGCCA ACT  
C CATCTCAACCAAGTCGACCA ATTC AGCGTCTTCTTCG GAAA TCATGTCAAT TTTA TTGAGAAA ACAAC  
GATGTAAGGA ACCC CAACTTGTCTTGCCAAA GAAT ATGCTC TTTA G CAAA AGGCATAGCTCCGTCTGTT  
GCA GAAA CTACTA GAAT TAGCCCCGTCCA CAAA AGCCGCACCGGTGATCATGTT TTTA ACATAGTCAGCGT  
GACCAGGGCAGTCCACGTGAGCGTAGTGACGATTAGCTG TTT C GT ACTCAACGTGGGAAGCGTAAATTGT  
AATACCGCGAGCTT TTT C TTCAG GAGT GTTGTCAATAGAGCTATAATCAC GAAA ATCAGCCA ACCC ATCT  
CCAGACAACGTACGCGTAATAGCAGCTGTCAACGTAGTCTTACCATGGTCAACGTGGCCAATGGTCCCTA  
TGTTGATATGAGGCTTATTACGTT GAAA AG TTT C T CAAA ACATCTCAAAAATCC TCAAAT TAAA AATTAG  
CAAA CTACCGATATCT CAAA CCA GAAT AGGAAT TGAACCTACGGCCACTTGCTTACCATGCAAGTGTCT  
TACCCTGAGCTACCTGGGCTTAGCACAAAAGAGGAAGCAACCTAATTAGCATCGCAAC TTT C CCGCAAT  
CAA ACTC TCAACCAGCCTCAACTAGT TTT C TCA ACCC CTCAGCCGCAGACAAAAGTGGCGCAGAA TCAA  
CTGAAGATAATCTCGGTCTCGACACGAGCATAGTAACTT CAGACGC GGAT TATTATCAAGC TTT C CTCTT  
AAA ACTGCGTGAC TTT ATTTA TAA GGAT TAGCAAAAACAACCTTAAACGATGTCTGTAGACAACACGAGCCTT  
CGTCAAATCATAAGTAGACAT TTT C GACGGTACGCGATCTCCAACGAGCAAGC GGAT AT TACTC ATACGC  
AT TTTA CCGCACAGATGCGCTGTAATGGGA ACCC CATTC TCTAACATC ACCC TAAA ATGCATGCCGGGCA  
ACAGCTCTTCC ACTC TACCTTCTAGAACGATCGTATCTTCTTTT CAAA CCATTC TAAAAAACC TAAA  
AAC ATTC TATCTCTTGATCC CAGC ATTC AAACAAAAA AACAGGCC TGGGC ACCC AATGAAGCTGCAGCA  
CCTGTTGTCTCCG GAAA CTC GAGAGAGCGATTATATCGAC TAAA CA GAAA ATGTCAAACAACCTTGTCAA  
AAAACAGAAG GAAA AGTATCT CAAA AC ATTC TCTCTT GAGT T CAAA CGGGAAT AACAAATATTTT TTTA  
CAAA TTTA CAAGCAAAA ACCC AATACCT TAAA CTTGTCTCTCTTAG ACTC AATACTTACAG TAAA ACTC



CCCATTCTTCCGAATGAGAAGCTTCGCTTCTGTTTTAGAAAACATCAAAAGACACTCTAGTTAGTCCTT  
GCCTGAAAATGTTGTCTCGGTATA TAAAGTAGAGTAGATAGGCCATGGTCAAAGCCGCTCATCCCTTACA  
TTCCTCTATTTC CGGCGCGCTGCCCTTACATTCCTCGAGAGGGGAGCTTATCACGATTCCTAGGAGAT  
CTGC ACTCTCCAA TTTCCAAA ACTCGCCCGCATTATCCGTACTCACCC CAGAGCCTGCTCAAAGCAAAA  
GTCGGGTACAAGCCGTAGCCAATACTATCGGAGACTTTTTC AAA GAAACTGGAAGCACTTACTCTTGTA  
CATTCTTGCCTGGTCTCTTATTTTAA CAAATCACAGTTCGGTTGCACTTGT TTTAAGCA CAAA GCTAGGA  
ATAGGACAAAAGAGCTGGTGTGTCCTTGGTATTA TTTCTGCTAA TTTCTAGATAAAAGAAAACAAATACC  
CTCACTTAAACAGTCCAAA GAATATCACTAATCACGGAT TACAACA ACTGGATCC TAATGGAACTCGTCA  
GGTCTGCTTGCCACCGTTATTGCGTCGATTTCTGCCCCTTA TTTA TGCCTCTCCTCAAGCTATCGGGTTT  
ATTATTGGAGCTTT TTTAGGACATCAAACAAGCTCGTTAGCTG TTTATGGATACCGGTTCAAATCAGGTC  
CAGGATATATTGCAGATCAGGAACG CAAAA TAAA CAA GAAA AAC GAATTC GACAAGCCATCATGCAGTG  
TCGGTTAATTCGTAACCAATGGT CAAA CAACGCCGCCTAGATATATTACAGAAA CGCGCCCATCGTCCG  
GGACAATCACAACCATAACAATACGACCTCTTACAAACCGCATTTCTCTACCCGAA GAAATGGAACATG  
AGATCTTGGGCAA GAAACCAAGTAGTCATTGCTATGCTCGACAA TAAAATTGCTCAGCTCAACCAATC  
GCTTGTAACA ACTCTATGACCGTCCAACAC GAGT TATTGAACAATGATATTA ACTACCCCTTCTGAACATA  
AAGCTTGTCTAGAAA AACAAGAGAAA GCTGTGGCTCTTCTCTTCCCA GAAAAC CAAAT TAAA GATACTTT  
TTACAAACA ACTCTTACAGATTGGTCGCACAGCCAAGCCTTTTC CAAAAGAGTCTTGACAAAA GAAAT  
TTAGT TTTAGGTTGCCAAAGCGATC TTTA CCTCCATGGC GAGT TCAAAAATAACGCAGTGTTTTT TTTCA  
CCTATACCGAAGCTCTAATCTCTTCAGGCGTTGCTGTACTGTTCTC GGATATCTATT CAGGAGAAA CTCC  
CGAAA CCATTC TACTTGCAAGCC TTTATTT CAAA AGAAGTTAAGTCGACACCTATCCATGGGGAGATCT  
CGTGGAGGAGAATCTCTATTCCTGAACATGCAACGTATAGCCGTTCAATATCTGGCTC GAAA AACCTAAT  
GAGATAGCCAATGATTCCTATTGGCTATCTCCTCCTGCTCACAAGACTACTTAG TTTCTTCGACGAGCAT  
TCCTTACCAAGCGGAATGCTGTATAGA GAAA GTATAATAGCATG ACCCCGCACCATATCATACGTATAAC  
ATTAAGCGTGC GCGCCACACCTGTTGTCTGAACATCAGTCTCAT TAAATCCAGTAATAGATGGAAGAACA  
GGTCTGGTTGTGCTATTC CCCGAACATGTACTAGTATTA TTTA ACGACGGGGT AGTC GAAT TGGCAATTA  
CTGTAGA CAAA GTGTAGAGGTATTGTTGCAAGGAACTTCTCGACATATCTCTGGCAATCTTAAG TAAAG  
CCGTCTATTC CGA GAAA CATTAGCTGCACCAAAGCCCCACAACTACAGACACTA ACTCTACCGAAGTAC  
CAACGGCAGCATGTTGTCTAGCAGATATCGGTCTCTCCGATCATCC CAAATAGCTCTACCGCTTGAC  
AAAGATTCAGAG ACCCTAGCCT TTTCTTCTATATAC ACTCGGAGTGTAAATCC TCATGCCAATCCAA  
CAACTCTATCC CATAAGGCAGGCCAATGCCTCTCGGCAATATCCAAA GAATTACAGGTGTCAGAGTAGA  
CTCCATCC AAAAAAATAGGTTCCCTCAGGCAAGACTGGCGAGGATCAT CAAA AAGCAGCAACT GAATCGTT  
ACCCCGTAGCCGCAACTTA ACTC CATA ACTCCGACCAACCATGCCAAGAGGAGAATAACTTCGCAAGCA  
TCCCTAACATACGGGAACGTTGCGCTCTTCTTGGACTAT GAGTACACAATA GAAA GATTTCC GAAA GAAC  
TCCTCCACATAAGAAGCTGT TAAA TCCT GAATCC AACATATC TAAA GCTTCCCAAGATGCAGGGTATAG  
GAATATGCAGCCTTGGTTGTAGTTA GAGTATGTCTACACAGAGTAGTCAACAAA GAATCAACCGTACAT  
AAGAAA AAGGGAAG GGATTC GCTGCTCGCACAGAAGAGGTAATATCC TCATTTAAA GCTGCATACAAACG  
CGAAAAGCAACACTATCTTCTGAGGATACTACTCGAACAAAGTTGCAAACGAGAA GAGTCC GAATCC TCA  
CTAGTAGGAGA ACTCGCTGCAGACAAAGA ACTCAATCC TGCAAGCCGCA TAAA TTC CATAACGAAACCAA  
GTTCAAAGCATGCATCC CCCACTC CAGGAGTAATAC CAAATGAGTGAGGAGAAA ATGGAACATGT GAAA  
AC ACCCATCTCTCGGGCAGACAGGTATCCACTC ATATCTAGAATTC GTCCACA ACTACCAGGACTTGTG  
TAGAAA TGTCTATTGTCGTTACTGTTACAAAAATGAT GGATTAATTCCAACA ACCCGAATACGAGCAC  
GCTGTAACGGACAGCTAATCAACTGAAGAGCTCTCTTACAAATAGCCCTCCATCGCCATAG TAAA TCTG  
TAAA AACCGCCATCAGAC ACCCTACT GAAA AACCTATCCCAAGCTCTCAACAAAGCTTGTACCGTAGGG  
TGATGAGCAGAAA TTG GAAA ACAGCCCGCCACCC CTAGTCTCTAGCGAGCAGGTTACAGGCC ATTC CAC  
CAGCATTAGGAATCGCAGTCACAGGCTGAT GAAA GAGTTCGCTCAACT GAAA GCTCTCTCCCCACACT  
ACGATGAGTTAACCC ACTAGCATTAACTATCC TACTTCAACAAACGGTATTC GATTGTGCTGTCATCA  
TCATCAC TAAA ATCATAACACGC ACTC CAGAACGCCTATTCGCAGCA GAATCAAG ACTCAAATCTATCA  
AATCTGAAGAGGGACTGCTATCC CCCCCCAGTAAC ACTCAAATGTTCTGCAGTAGCCTGAATCTGCATA  
GAAGCAGA ACTCACAGAT ACCCCATCTTCTGGTGAAGA ACTCTGAACTACTCGATT CAGTGGTATTC TCTT  
CGTCGCTATGTATGCGACAATAAGGTGTGTC TTTA CTATTATTGGAACATGGAT CAGGCATATCTTCTCC  
CTAAA GCGCCCCC TTTAAA ATTGTTA TTTA CAACCACAAATGCTTC TAAA CGACCCAATCC CCTCAT  
TGCCATGAAC TAAA AACTTGTGATC GAGTCAAAAAAAGCTC CAAA CTAGACC TTTAGGTCTAACAAAG  
AGC TTTA TCATCGTTCGC GAAT TACTAATCTCTTCTGCTTAACCTCCTTCGGTCC ACCC CTCAGTCAA

AGAAA CCAACG CAAA GTAACAGGAT GCATCA CAAA AGAGAAA ACAACTTCATAGGAAGCAATCA CAAA  
GAACAAACAC ACCC AGAGA ACTGCTGCTGCAGACCTG ACTCTGAAA TCAAAGCAAAGCG TTTCTAAAAC  
TGAGTGTGTTTCATATATG GAAA TAATTT TTTAATATGGCTCAAGGT TTTATTC TTCTTAGAAA TAAACT  
CAAGAGCT TTTCACTC GCTTAAA TAACTGAAA ATGAG ATCC TCTA ATCAACAATCTTGGGAACAA TAAA  
ACATTC AAAACCC AAGCTTGGTCAC ACCCGTCTCTAAGAAGTAGGCACAAATACTATGTTGAACAAAACA  
AGAAGAAA ACGGAT GAGCCCATGTC TAAA AAGCCCTCTGTAGACCAGAAGGCTTGC CAAAAC CAAA TAAC  
GATTA TAAA CTCTCTTGA TTTG GGTCTCT ATCC TTAAGTACTGCTCGA ACCCGTAACGCG GAGT CCCTC  
GAAT TACACCAGAGGAT CTAGTTCTGATTACACAACACCTTGTACTAACATCGACTGATGAGCATC TAA  
AAACAATACACAATTTGTTACT TAAA ACGACT TTTA GCGTTCATCATAA TAAATAAAA AAAGAAA CCAAGG  
GAATAGTATCGA TTTCAA GAAA AAGCGCAACGA TAAA ACAAACCCTCT TAAATAAAA AATTATAAT ACC  
CTGATAAGC CAAA TTCTTGTC AAAACATTAGCCACCTATGATAAGCTTCCCTTCTTCT ATCC TGGGGCAAT  
AGCTCAGCGTTAGAGCTGCGG ACTCATA ACCCGTAGGTCCCTGGTTCAAATCC AGGTTGCCCC ATTC TT  
GTCTCCCGGTCTA TAAA AACTCTCCCTC TAAAACAC TAAAAGTGTGAA ACTCGACAGTTCCTTAGCT GAGT  
TTA TCAATGCCTGCATCAAAAAATATC CAAA CGCAAATGCCTGGGCGCTCT ACCC CAGAAGACACATC  
AATCC CCCTGGGAT TGAGAAGACTGATACCTTC CAAA ATATTC CAAAGGTTGACTC CTCC ACCCAACATC  
CAAT TATTATGTT GAAA AAGGAGA GAATGC TTTT CAATCAAAGGAGAGCCTC TTTT CCGCCAATGTGGT  
CGTATAACAGTTACTGCATCGTT CATTTGGGGCAGTGTGCAGAGGGCTGTCCATTAGAATAAAA CCGA  
TACAACATA GAAA ATA GAAA AATGCTCTCGTAACTGAGAAA CAAA AATAGAATATCC TCTCCAGACAAC  
TGGAT ACTGGTAATCC CTGTGCGCTCAGTAATAGC TAAAATTTCT TCTACTGAATGCTCTGG GAATACTC  
CAACAGGTTCC GAATTC CTTTCTGTATAGCCTCTACGATATAC CAAA CTT TTTT TTC ACTC ACACATCT  
TCGAGAAT TTTAG CAAAAATCATGCCAATGTAATCGGCTCCCGC CAAAGCAGCTTCCCGAGCATCATCA  
GGAT GCGTAATACCACAAAT TTTT ACCTTCATACAACAAAGGGGC TAAA ACCAACTA TTTAAGCAAATTC  
ACAGAAA AAAGTAAGACAAGAAGATCAGCATATCC AAGAGTTTATATCAAAGCAATA GAAAATAAAA TCAT  
ATAAAA AATAAGCCTCCCTTGCAAGAAA TC GAGTATTACGCC AAAATCTATCTTACAAAATACATGCACAG  
GTTATTCAGCAAAT TTTATGTTTACAGACAAAAGAAA CTCACAGAAA ACCATTTT CAACTTGGGCCACCT  
TCTCC ACTCTGAGCCATCAAAGCAA CAAATTTT GGTAATTGGAAA ATGAACAAAACGCTTACCGAAGCT  
CAGACCTT TTTAAA AAG TTTT CTCTCTAGTGAC ATTC TGTCTAATCC CCAAATCATTACAGGAAT CATT  
CTCC TTTACACTGCTGTGAGCTTGTCAACAAGCTGTAAGCGATTC CCCCATC TTTT TTGGAGCCAAAC  
CACTCATGAAGCTG ACTCAGGAGCT TTTACTGGTGAGATTTT CAGCCCAATGCTCAAAGATATCG GAGTC  
GAT CAAA TTCTCATCGGAC ATTC CAAA GACGTCATATC TTTT ATGAACAAAATCC TGTACTTGCT GAAA  
AAGCTGCTGCAGCT ATCC ATAGTG GAATGATTC CAGTTCGTGTATTGGAGAAA CTC TAGAAGAACAAGA  
ATCTGAGCAACTCAAGAT ATTC TTTA AATCAACTGACTATAAGGAT TATC TAAA CTCCTGAGCAAGCC  
TC TTTATTC TAGCTTATGAACCAGTCTGGGCTATAGGCACCG GAAA AGTAGCTC ATCCTGATCTAGTTC  
AG GAAA CCCATGCT TTTT TGTA GAAA AACGATTGCTTCTCTCT TTTT CAAAGATATTGCGGAACGC ACCCC  
CATTC TTTACGGAGGAT CTGT GAAA GCCGATAATGCTCGTCAC TTTT CCTCTGCCCTGATGT GAATGGT  
CT TTTAGTTGGAGGAGCCTC TTTA TCTTCAGAGAA TTTTCTTATCC ATTATAACAACAAATCGATATCC CAT  
AACTCACACGTACCTATGTCGATCAC ATCC CCTCTATAGAAG TTTT TGTCTGACAG ATTC TATTAAGA  
ATCT TTTAGAAA AAAAT TTTT TTCGCTAGTGGT TAAA GGAGAACTTAGTAACGTCTC TTTA CAAACAAG  
CGGTC ACTTATAT CAAA CTATCAAAGATAGCAAGGCTGTACTTAACGGAGCTTTT TTTT CATTTC CGTAGC  
AAATAC CAAA ACCGCAAACCAAAGATGGCGACTACGTG ATTC TTCATGG GAAA CTCACAGTCTATGCTC  
CTAGAGGACAATAACCAGATTGTGGCCTATGCTCTCACCTTCTCCGGAGAAGGTAA CAAA CTGCAGCAATT  
CGAAGAACGCAAACAACGTCTCGCTGCTGAGGGATA TTTT CAGTCC TAAA CGAAAAAGCCTCTTCTTCA  
GGAGCTCGCGTAATAG GGGT GATTACAAGCCCTACAGGGGCTGTC ATTC AAGATAT TTTT CAGGTC TTT  
CTCGCCGTTGTCACCAA TTTT AAGTCATCTTAT ATCC AGTGACGGTACAAGGAGCTACTGCGGCTCAAGA  
GAT TTTT CAGGCT ATTC AATT TTTT AATCAAACAGTATGAGGGT CCACGCTCTTATCATCGCAAGGGC  
GGTGGAAGTATCGAGGAT CTCTGGGCT TTTA ATGAAGAAGAGCTAGT TAAA TCTATTGTAGCAAGCTCCA  
TTCT ATTA TTTT TGTGTTGGTCACGAGACTGA TTTT ACTCTCTGCGAC CAAA CATCCGATGTTCTGTC  
TCCG ACCC CCTCTGCAGCAGCA GAAA TTGTATGTAA GAGTAGTGATCAATACCGCCAAGAACTGCAAAAT  
CTACGGCGCTACGCTCGTCTCATGCAAGACAA TTTA TTGCGAGC TAAA AAAAAACCTTCTC ACTC ATTGGC  
AAAGACATCTTGCTTCAGTAGA TTTT TACCACACAGCACAACAAAC TTTA GATTAC ACCCGAGCGGCCTT  
AGAAA GAGGGATAGAAA CCAAACCTT GAATACTA TAAA CAACGA CAAA CGCAATATAGACGCTGGTT GAAA  
AGCGATGT CAAA ATTC GTATA GAAA AACACAAA GC GGATCTGAACCAATCTCTTATGC TTTT TA TAAAA  
ATAAAA TTTATACAAAAAAACCTCTC TAAA CCAGCTATACACTTCTTGTCTCAAAAATGAACTACT GAA

TTTACAGCACCGCACGCAGCACTCGCGAATATTTTAAAGCCAGCTATCTAGGAGGCTGCATATCGCGATT  
GCAAGCTCACAACAAACTCACCAAAGAGTGCAAA GTTCGTCTTCAGAACGAAC TTTCTTTTACAATACAAC  
ACCTGCTAACTAAGGC GAAA GAACGGTGCCAGGCTATAACAAGAACAAGCTTCCCTCAC TAAATCCAAAAA  
TGT TTTAAAAGAGGT CAAACCCAGCTA CAAAAC TTTAATAAA CAC CAAATTATCATCTCTGCG GAATCT  
CT TAAA CAAAGTGATCTTGTGC GGGTCTGCCTCCAAGACGGTGAAGCAGTTGTATCAG TAAAAGAAG CAA  
AGCTTAACAATGACAAAAAAGGC TAAA AATGTG GAAA AAGTCCCT CAAA AAGACGCTAT GAAA CG CAAAG  
AAGAGATCATAGACCTTAT GAAT CAACCAACCACGTC TTTA GAAGCTTCTCTTGCCTTGTATGAAGAGGC  
TGATCAATTAATGCGTATATGT GAGTCTCGCATTC AAGAAGTCGAAGCACGTAT TAAA CAGC TTTCCGAC  
CAACGGAGC GAATCGTAGCCGGTCATGCAG GAAA TCTCGGTACCTGAAGCAAGTCATCTGGACACCGTTA  
TACAGCGCTTCTGGT TTTACAGAAGGCGTTGAGGACTGTCATTC CGTGGAAGCTATCTTGGCTATCTA  
TGAG GAAA TGT TTTCTCTTATTC AAGAAGGA GAAA CCAA CAAA AACCATGTGGAACAGCTGAGT TTTCCAG  
CTACAAC TAAACCCCGATGGTTCTGTGCGAGTAGATACTTCAGGCAATCCCATTAAGCATCCCTTTTATCC  
CTGGG GAATCTGTATGACCTACTCCT CAAA CCACAC ATCCACTC TCCTCAAGATCTTCATGC TTTATCT  
TTA GATAAGCTCCCTGTATTGTGTGAT GAAATTC GTAATAAGATTATTGAGAGTCTCTCTTAACAGGTG  
GCCACTTAGCTTCTAA TTTAGGTG GAGTAGAGCTTACCGTTGCTCTGCATTACGT TTTCTCCTCACCAGA  
TGATCAG TTTATT CAAAATGTGCGGCACCAATCC TATGTACATAAA CTATTAACAGGCCGCAACACAGAA  
GC TTTCTCCAATATACGACATGATAACGGACTCAGT GGATTTA CAACCCCAAGAGT CGAACCATGATA  
TATT TTTCTCTGGTCATGCGGGCAATGCC TTTCTTTAGCTTTA GGGCTGGCCAA GGGTCTTCAAATAG  
CTCTTCGCATATACTACCT ATTC TTGGAGATGCTGCTT TTTCTTGTGGCTTAACACTAGAAGC CAAAAT  
AAC ATCCCTGCTGACTTATCGAAGTTCATTATTGTCTGAACGACAACCAAATGTGATCTCAGAAAACG  
TTGG GAATATTCCTCAAGGAATCTCCAGTGGATAT ATCC TCAAAAAATAAG TAAA CTATCTCAAAAAAT  
TCACTCTTGGATACAGAATCTTCCAAGT TTTCTACACAAAAGAAGAC TTTATCGCACAAAGTAGATATC  
GCTCT GAAATC TTTATCCCATCC CAAACAAAACAG CAAA GCCTACATTACGTAGTCTTATTGACGGAC  
ATAACGTCAAAAAGCTTGTTC AAGCTCTGCAAATGATCAAAGACCAGCCTCAGCCT ATTC TGT TTTCATGT  
GTGTACAG TAAAAG GAAATGG TTTA ACTGAAGCT GAAA GAGACCC GATTCGCTATCATGGAGT GAAA GCG  
CA TTTCTCAAAATACCTCTCT TAAA AAAACCTCTGGCAATGTT GAAT TACAAACCC CGA TTTCTGTTCCCTC  
AACATGCCGG GAATATCC TATGTGACTGGGGAA GAAA ATCC TCAATTGCAAGTCGTA ACTC CTGCCAT  
GTC TTTAGGGTCTTG CAAAGAAGA TTTCTCGCAAACAATCC CAGATCG TTTCTACAGATGTAGGCATAGCA  
GAAGGTCATGCTGTCACAT TTTCTGGCAG GAATAGCTCGTAGCGGC ACCCCTGTATGCTGCTCTATAT ATT  
CTACTTT TTTA CACCGGGCTATGGACAACGTATTC CATGATGCTGTATGCAAGAGCTCCCGTGATCTT  
CGCTATTGATCGTGCAGGGCTAGC TTTCTCACGATGGACGTAGCCACCATGGTATCTATGATTTA GGCTTC  
TTATGTTCCATGCC GAATATGGTCA CAAATCAACCACGCAACGCCCTTGTTCCTT GAAA GACTATTC TTT  
CTTCTCTATTATG GAAATCTCCTTGTGCC ATTC GAT ACCCTAACATCC CAGCTAATGA GAAA GCTTCTAA  
CAGTTCCTCCCTT TTTCTCCC ATTC TTCTGGAGAGGCTGAG ATTC CAAA CCAAGGAGATGAT TTTATTG  
TTGATAGCTCTTGGGCACATGTGTAACACTGCTCTAACCGTCAAAGAACATCTCTAGATTACG GAATCT  
CAACAACAGTTGTTG ATCCATT TTTAT TAAAACC CAAAGATC GAAA ACTCCTACAATCCCTACTTACCCA  
CC ACTC CAAAGTAATCAT TTTA GAAGAAC ATTC ATTCATGGCGGCTTAGGGT CAGAG TTTCTCCT TTTCT  
T TAAA CCAACATAATATTAAGGCAGATGTTCTCTCCCTCGGAGT ACCAGATATG TTTATCCCGCAGC GAA  
ATCC T GAAA CTAT TTTAAACAAA ATTGG ACTC ACCAGCGATCACATC ACTCAAC GAATCCTTTCTCATTT  
TAAA TTC TCCAC ACCATTCTATCGAACGCTTT TTTAAAGCGTAGCGATTGCGGTTGC TAAA TAT CAAA  
TATAGTTGAAGGCTTC TTTCA TTTCTGGATATTC TAGAAGATATTC TACTCACTAATACCGGTATCCCGAT  
TTA TGATCGCTAGAAC GAAAATTA CAAA TACGATAGGCCCTGCAAC GAATACCC CTGAGATGCTG GAAA  
GCTTCTCGATGCAG GGATGAATGTAGCTCGCCTTAAT TTTAGCCACGGG ACCCAT GAAA GCCATGGCCGG  
ACCATCGCT ATTC TAAA GAAC TACGAGAGAAGCGCCAAGTTCC TTTA GCTATTATGCTAGATACAAAAG  
GTCCC GAAATTCG TTTAGGCCAAGTAGAATCTCCTA TAAAAGTACAGCCTGG GGATCGTCTTACTC TCGT  
TAGCAA GAAAT TTTAGGATCCAAA GAAA GCGGCGTT ACTC TTTATCC AAGTTGTGT ATTC CCTTATGTT  
AGAGAACGAGCTCCTGTTCTCATTGATGATGGGTAT ATCCAAGCAGTGGTGGTCAATGCTCAAGAGCATA  
TGGTG GAAATAGAG TTTCAAAATTC AGGA GAAATAAA ATCCAACAAATCTCTTAGCATCAAAGATATCGA  
TGTTGCTCTTCC TTTCTATGACAGAGAA GGATATTGCAGACT TAAA ACAAAGGGT AGAACAAGA ACTC GAT  
CTTATCGCTGCTTCGTTCTGTCAGATGTAATGAAGATATTGACAGCATGCG TAAA GT CAAAGAAA GC CAAA  
GTCGTCCTAATATGCCCATCATTGCCAAAATA GAAA ATCAT TTTA GGAGTACAAA TTTCCAAGAGATCGC  
TAGAGCTGCTGATGGTATCATGATTGCACGCGG GGATCTTGGTATT GAAT TGTCTATTGTTGAAGTTCCCT  
GGACTACAAAA TTTA TGGCCCCGAGCATCGAGG GAAA CGGGT CCGT CAAA TATCACTGCAACGCAAATGC

TCGAGTCAATGATTCGCAACCCCTTCCTACACGAGCCGAAGTCTCTGACGTTGCCAACGCCATTTACGA  
TGGAACCTCTGCAGTCATGTTGTCTGGAAGAACTGCCTCAGGAGCCCATCCGTGTACATGCAGTAAAACA  
ATGCGTTCATTATCCAAGAGACTGAGAAGACTTTTCGATTACCACGCTTTTTCAGCTGAACGACAAAA  
ACAGCGCTCTCAAAGTTTCCTCTTATCTTGAAGCCATTGGGTTTTCGGAATCCAAATTGCAGAAAAGC  
ATCTGCCAAAGCCATTATTGTGTATACCCAGACGGGAGGATCTCCGATGTTTTATCCAAATATCGACCT  
TATCTCCCTATTATTGCTGTTACCCCTAACCGCAATGTGTACTATCGTTTAGCTGTAGAATGGGAGTAT  
ATCCATATGCTAACCCGGAATCGAACCGTACAGTCTGGCGTCACCAAGCTTGTGTATATGGAGTAAAA  
AGGAATTCTTCTAACTATGATAAAATTCCTTGTCTTCAGCCGCGGAGCTGGGATGCAAGATACCAACAAT  
CTCACCTTGACAACCTGTGCATGATGCGCTATCCCTCTCTTGACGAGATAGTCCATAATCATTGAAAC  
CATATAGCAGGTATGCTTCTATCGTTAGACTTTCGGTATTACTGTAAGGAATTTAAAACAAATTACAG  
TAGAGTCAAATCCTCGAGAGATCGTCAAAATTCACCGGGTTTCGGATCCGAAAAGTCTTCTCTTGC  
CAATACTATTTATGCGCGAGGAAAGAAACGCTACCTTGCTACCCCTCCCTCTTTCCAAAACAAAGCTA  
GACTCCTTACCAGATCCCTCCGTAAAAGAGATAGAAAGGATGTCTCCAACCGTAGCCGTTAAGCAAACCT  
TTTTGAACAACACGTACATGCGACAGTCCGTAGTACAACCAGAAATAACTCGTATTTAGCCCTACTTT  
CTCCTTAGAGGGCCAAGCCTATGATCCGGTTACACTACACCCCTAACTCTATACAGTAAGAAAAAATC  
CTTTCGAAATAGCTGCCATTCAGATGGAACCTCAACTGACCAAACTCGCTCCTCTTCCCGCCAGGGATG  
TTCTTACCGTTCGAGAATGTCTCCGTCAAGGGTTTACCAAAGTCCCTATTGATGAAGAGGTTGTTCTAT  
TCATAAGTTTCTTACAACAGGCATTCCTGTTCCCGGTCAACTCATTGTGCGATACGTTGATCAAAAATACC  
TCTAACACTCCGCGGTAAAAGTCAGCTTATTTTCAACCTTAGACATCGGTATGTTGAATGCTCCTTAC  
ACTTCGATAATCAGAAACGAGTCTTTCCACACAGGCGACTCTCCAAGAAACACAACAACTATGCGCC  
GCTATCCCAGATCTTTTTCGTCGCACAGTCAAAAGATCGTTGTCCACAATGCCAAGGTTTCCAGAAATC  
TTTTATATCCATCGATGATCCCTGTATCATCCAGCAAACGCTCTCCATCGAAGACAACCTGTGTCTCTAAA  
CAGGGAATTGCTCCACCTTCTTATATAGAACCATCTATCAATCTCTAGCTGATAGCCTAGGATTTAGTCT  
CAGCACTCCGTGGCAAAATCTTTCCTGAAATCCAACATATTTTTTTATATGGGAAAGAAGGTCTCTCT  
ATCCAGTAAAGCTGCAAAATGGAACTTTAGGTAAGAAAACCCAGACACATAAGCAATGAAAAGGTGTGC  
TCAATGAAATTTGGAGAAAAAATTCGATTTTCAAATAAGCCTGCTCGCTACCTTCCAAAAGGACTTCCTA  
TACAGTATGCCCCAGATGTAACAAGACTGGACTCAGCGACTATGCTAATGCTACCCGATGGCATGGAAAA  
AGCCAAAACAGACTTTCACAAATGTCTCTTCAAGAGTTATTTATTTTCCTGAATCACTTCCTAAGAAAAG  
AGCTCGCTATTGAGGAAGTAATCCAAAGGATTCAAATCGCGACTTGCTATTCGATAGATCTTGGTCTTCC  
CTACCCTTTCCTCAGAAAAGAGCTATTGATACTCTTTCGCGGGGAGAACGGGAACGTACGGCCTTAGCTAAG  
CATCTAGGTGCCGAACCTCATCGGAGTCATGTATATCCTGGATGAGCCTTCTATTGGGCTACATCCTCAGG  
ATACCCATAAGCTTATGAATGTTATTCGAAGACTCCGTGATCAGGAAAACACTGTCTTACTCGTTGAACA  
TGATGAGCAGATGATTTCTCTCGCAGACCGGTCATTGATATCGGCCAGGAGCTGGTATTCAAAAGTGGC  
GAAGTTGTCTTCAATGGATCTCCTAGAGAATTTCTGGCAAAGAGTACTCCAAAACCGCACAAATATCTCC  
GTCAAGAGCAACATATTTCGGTCCCTGCTAAAAGTACAAACTCTTAGGGACAATTACCTTATCTAAAAGC  
CAATAAGCATAATCTTAAAGACCTGACAGTTTCAATTCATTAGGACAATGACTGTCTGTCACCGGAGTC  
TCTGGTCTGGGAAATCTTCTCTTATCAACGATACACTAGTCCCTTGTGTGGAAAGGTTTATTGAACAGG  
GATTCGTTCCTACTCTATCTATTCAGGAGCCCTCTCTCGCTTGTCCATATTAATAGAGATCTTCCAGG  
ACGCTCACAAACGATCTATCCCAAAACCTATATCAAAGCTCAAAACGAGGTTGTCAGTTATTCGCAGAA  
CAACCTCGCTGTAAAACCTTAGGACTCACAAAAGCCACTTTAGCTTCAACACGCCTCTAGGAGCCTGTG  
CAGAATGTGGAGGCTAGGATCTATAACAACGACTGATAACCGCGATTCCATAACCTGTCTTCTCTGTT  
AGGGAAACGATTCCTCCCTCAAGTATTAGAAGTCCGCTATAAAAATAAAACGATTGCCGACATTCCTTAA  
ATGACGGCCTATGAAGCTAAAACCTTCTTTTATGATGAGCCTAGTATTCATCAAAAAATCAAAACCTTAT  
GCACTCTGGGACTACAATACCTTCTCTAGGAAGACCTCTCTATAGCTTATCTGGAGGAGAAATCCAGAG  
ACTCAAGCTTGCATATGAGTTATTGGCTCCAGTAAAACCCCTACTCTCTATGTTCTTGATGAACCCACA  
ACAGGCCTCCACACCCACGATGTCAAACAACCTTATTTATGTTGTGCAATCCCTTATTCATCAAGGGCCT  
CGGTGATCATCATCGAGCATAACATGCATGTGGTGAAGTTGCAGACTATATACTGGAACCTTGGTCTGA  
AGGAGGAAATAAAAGCGGTTATCTCATAGCTTCTTGTCTCTCAGAAGAGCTAATCCATAAAACATACTCCA  
ACAGCTATAGCTCTCCGTCTTTCCTATCTTCTCTCAAGAACTCCCTTATCTACCTGATCCGAGTCCCA  
AACCTCCTGTACCCGCCGCACTTACTATTGCAAACGCTCACCAAGTATAATTTAAAACATATCGATCTCTC  
CATACCTCGATATGCGCTTACTGCTGTGACAGGTCCATCCGCTTCCGGGAAACATTCCTTGTACAAAAT  
ATTCGTCATGCAGCAGGAAACATCGCTTACGCAGAGCTATTCCTCCTATATCCGACAAGCTCTCAAAA  
AAAAACTCTCTTCTGTGTTGATAAAGTAACAGGACTATCCCTGTTATCGCGATAAAAAACGAG

CGCCTCGA GAAATTCCAATCATTCTGTGGCTTCTGCATTAGAAA TCTCAGAAATGCTAGAAAGCCTTTTC  
ACACGAATCGGCCATCCTTATTC TCCGATTTCTGGTGATGCACTAAGAATAATTTCTCCTGAAACGATTG  
CTGAA GAAT TGCTCAGCATTACAC GAAAGGCTATGTAACGATTACTGTTCC TTTCC TAAAAGAGGAAGA  
GTTTTTCTCTTATACGCAAGAGATGCTTCAGGAA GGGT TTTAAAAC TTTATGCTAATGAACAGTTCTAT  
GATTTAGATGGGCC TTTCCCTACTTC TTTAGAGA ACCAGCTCTAGTC ATCC ACCATGTCAAAT TTTAG  
AAAAAATCTGCCTTCTCT CAAA GCTTCTCTTAC TTTAGCC TTTAG TAAA GCTTCTTCTGTCTGTCTGCA  
TATC GAAT ATGCTGGAACAAGCTTATC TAAAACATACCGCCAA GGAT TACAAGATGCTTCTGGGAACCTA  
TTCCCTAATATA GAAAC ACCCTCTATCTTGAACCATGAGAGCTACTTATGCCCTCTCTGTCTATG GAAAG  
GCTTCTT ATCC ACTTGTCTATTC TTCTCATAA GAAACG TTTCC GCACAGCAT ACCCAAATTTCTCTTATT  
CACAAGCCTATTTCTAACCAGGATCC TCCACCGATCT ATCCCTTCT GAATGAAC TAGGGATCCCTTCC  
ATTGCTCT ATTC CAA GAAATAGATGTTCTTTCT CAAA AATCTC CAA CCTAGGAACACAACAACATCTGG  
GAT TGAATGCTC CAAA CACAAAAGCAATGTTAATG GAATCC GAAGAAGA TTTCCCTCCCGACCTTATCTC  
CAAACTC CGTGTAACCAATGTCA GGGT CTTGGCGTATACACCTACAAGCATTGC ATCCGTATTC ACAGC  
A TTTCCCTATCAGAAATTTACCAATCC AATGTGCT TTTCT TAAA AAGCTCTTAC TTTCTGTAGAAGAGG  
AACCC TCTCTTGTTC AAGATATCC TTAGTAGATTGGACCTTCTAGATC GAGTT GGGT TAGGCTATGTTAT  
CCTCGGACAAGAACAACAGTC CAAAAGT GACGGAGAGCATTATAGGCTTCTATTTGGCAAAGCTT TTTCA  
TCAGGTCTCACTGATGTTATCTATCT TTTAGAAGATCC CTTAGCAG GGATTCAACC GGAAGATGCTCCTT  
G CAAA CTTGCTGTTAT TAAAAAACTC GTGACCAACCATAATACAGTAATAGTGAC GGATAGAGAAGGCTC  
TCTTGGCGAACATGCTGATTACCTGCTTACCT GGGT CCTGAACCTGGTCCTAACGGAGGCTATCTCTTA  
TCAACCAGCGCTCT TAAA CAATCTCAACCGGTAC CAAA CAACACACGCTCTTCCGAA GAAACACCACAAC  
TTTTG TGTCTCAGT ATCCACTTCTATG ATCCAAATTGAGAACCTTGC TTTCCCTTTA CAACGACTCTCGAC  
TATTTCTGGTGTATCAGGATCTGGCAAACAACCTTAC TAAA TAGCA TTTACGAACATGGCTGCGCTATT  
CTTGAAAAGGATCC TCTGTATTCTCA GAAAT TATT TTTCTAGATTCTATCC CAAATTGCATCTTCTC  
GATCCGATATCAGCACTTAT CAAAATATCGCTCCTTCATTAAGAAATTTCTACGTTCTCTGACTCAAGC  
AAAAGC TTTAAA CATCTCAGTTCTATG TTTAGTCCAATACCAAACAAGGGCAATGTTCCGGAT TGTGG  
GGACTAGGATATCAAT GGATAGATCGAGCCTTTTA TGCTATG GAAA AACGTCCCTGTCCAACATGTGGAG  
GATTC CGTGTACAACC ACTCATAACAAGAAGTTGTGTATGAAGG GAAACATTTCCGGCCAGTTATTACAAGC  
CTCTTTAAAATGAAGTAGCT GAAA CTT TTTCTTTCT TAAAAAAAATCCAGAAACCTTTTACACACCTTAATT  
ACAAATGGTCTTGGCTACTTATCATTGGGACAAAATATGGCCTCTCTGTCTCTAAGT GAAAAAATTGCCA  
TAAAATTAAC TAAA CATCTATTCCTTCCCTCC TAAA CATCTTAC TTTATTCCTTACTAGATGAGATAGCTAC  
CTCTCTTGACAATCAACAACAATCC GCTCTGCTCGTCCA ACTCAACACCTTGGTGTC TTTAGGACATACA  
GTAGTGATCATA GAAAC ACC ACCCTTCTCTCAGCAAGCTGATT CAAAGATACAAATGGGACG TAAAA  
CAGATAATCAC ATTC TC CAAA CAGGACCTAATCC CAATCTATCT TTTCACTTAAA GCCTCAC TTTAAATAA  
AACAAA AGATACGCTTGCCTATTC CTTGGATTAGCTAGATGCCGT TAAA TTTATGAGACAGCTAT TAAAAA  
TATACTCTCTCT TTTA CGAAGTTA GAGTAGATTAATACAGGG GAAA ATGCG TAAA CTAATCAGCAAAGAG  
ATTAGT GAAACCCATTC ATAGT TTTCTTCATCAA GAATAGTATAGCATGATTC TTTA GTTATGACCTCTT  
ATCAAG TTTCTTCAAGAAGGTACCGCCCGAACAATT TTTCCGAGATTC TTGGCCAGGATATAGTCGTGTC  
TATACTCAAGAATTC CTTGCGTCT GAAT CGCGCAGCACACGCCTACATATTTTC TGGTATTC GTGGGACA  
GGCAAACAACGTTAGCCCGTGTA CAAAC TAAA GCAT TAAA TTGTCAAATCC TACACAAGATCAAGAGC  
CTTGTAATCAATGCGCTA CAAA CAAAGAGATCTCTCTTGAACGTCAT GGAT GTTATC GAAA TCGATGG  
TGCTTCTCATCGAG GAAT CGAAGAT ATCCGGCAAATTAAC GAAA CAGTCCTC CAAA TCCCTTCAAATCT  
CGCTACAAGATCTATATTATTGATGAAGTACATATGCTAAC TAAA GAGGCTTTC AATTCCTCTAC TAAA GA  
CGTTGGAAGAGCCTCCTGCGCATGT GAAATT TTTCTTTGCCACAACG GAAATTGCAAAAATTC CTAATAC  
AAT ATCC AGTCTGCTGTCA GAAAATGCTCT TAAAACGCA TTTCTGAAAGAGCCATCATCGATAAGCTAGCA  
ACTATCGAAAACAAGAAGGTACA GAAA CTTACGAGAAGCTCTTCTCCCATTCG TAAAGCTGCTCAAG  
GAAGTCTTCGCGATGCC GAGTCGC TTTATGATTACGTAGTAGGCTCT TTTCT GAATCTTTAGATCCAGA  
CAGCACAGC TAAA GCTCTCGGTATTC TTTCCGAGGATAGCCTATATCAACTTGCAGAAGCCATTACT ACC  
CAAAATTACGAACAAGCGCTAACGCC TG TTTCCGATGCTATGCAAATGG GGGT TGCTCCAGCCCAT TTTCC  
TTCAAGATGTAAC CAACT TTTCCG TAG TTTCTCT TAAAGCAAT ATTC TAAA CAATTC CATTC TGTAGC  
GAC TAAA TACTCTCC GAAATTC TATTA GAAAT ACTC GAT TTTCTAGGAGAAT CTGCACGGCATATTAAT  
CTCGGTTA CAAAAA AACT TTTCTAGAAA CGGTGATT ATTC GTCTTCTAC GAA TTTACTCTCGCCCTA  
CATTC TCTCAGCTTGTCTCAGATACGACAACCTGCACCAACTC AAATACGCCCTATCCCTACTGCCTC  
AGAACTA GAAT CTTGCCACCACAAATCAATCAAGCAATACTGAG GAAA CAAAATCATCACCACAACCA

ACAGCTGTAGCAAAA**ACTC**TCCCAAGGAAGCCTGTTAACCGCTGCCTCATCACAACTAA**GAAAGAAA**CTA  
**TCC**ATCAG**GAAA**CACC**ACCC**CCTTCTCTCGATAAGA**TTTC**CCCTTCT**GAATCC**GCAGCCATCGACACGCT  
GTTACAA**CAAA**CTGTTGTAG**GAAT****TTTC**TG**GAGT****TTTA**ACTAAGGAGCCAAAACAT**GGGTAGCGG**TTACGC  
**TAAA**AA**GAAAA**AGAAGCCAAATTAATGGAACGCCA**ATTC**ATG**GAAA**TGGAGGCCCTCTCTTGAACA**GAAA**  
CGTT**TTTC**TGGAGAGGCTG**GAAA**TGGCTTGGTATCTGTAACTATCAACG**GAAA**ATGTGACCTGGTTGATG  
TTC**GAAT****TAAA**CCAGATTGTCTAG**ATCC**TGAAG**ATCC**TGAAGTAGTGGCAGACT**ATTC**CGCGCAGCA**TT**  
**TAAA**GCAGC**TAAA**GCAGC**CAAA**GATAGT**GAAA**TGTCGCTATGCAAATGG**GAAT**GCCGTTCTAATTT**TTT**  
**CCGTTACACATACAG****GAGT**TGATGAACCTCTTCGTATGT**TTTC**GCCCGCAATAACTGCTTCGT**TAAA**CGA  
GAGC**ACTC**CCCTT**GAGT**TCAAATCTAATAATCGCAT**TTTC**CAAG**GAAT****TTTA**TTGCTG**GGAT**GACAGCTGATA  
**ACTC****TTTACCC**CTAGTCC**TAAA**AACATAGGCAGAAGAGCAG**GAT**CTCCTGCCATCTCTCCACATACAGA  
TACGGGAAC**ATTC**TTCTG**TTTA**GCCTGCTCTACAACATGAT**GAAT****CATTC**TAATAACAGAA**GGAT**GCGGC  
**ACTC****TACTC**CGCTCTCCAAGTAAGGAACGCTCTCTAGAAGTGCC**TAAA**GTATACTGAGCAAGATCATTAG  
TACC**TAAA**GCTACAAAAGA**ACTC**TCTTG**TAAA****ATTC**CTCTAT**CATCC**AAACTGCAGAAG**GGAT**CTCTAT  
CATGCTTCCCATAAGATAT**TTTC**ACTGAT**CC****TTTC**AATAGCC**GAA****TTTC**TTCTT**GAAAA**AGCCGC**TTT**  
**ACTAAA**GCA**ATTC**TGAAGCATCTATC**ACCC**CAG**GAAT**CAATACCTTAAGTCGTCCT**ATTC**TAG**GAAA**CAA  
TAGCAATAGCCTGCAACTGCTCCTTCAATACTT**TTTC**TTGTTCTAATAACCACCGTACTGACCGATGAGA  
AGAG**GAAA**TACAAGGAC**ACTC****TTTA****TCC**TCTCCAAAATCAAACAACGCAATACAT**GAAT**ATCTGAACAC  
TG**GAAA**CTGAACTAATTGAGCATATTGATCAGCTTGTCTTCAACACAG**GGGT**AAGCGTCCCAAA**GAAA**AAG  
CCAT**TAAA****TTCT**TGAACGGAAGAGCCCAACACTTGTTCCTGGAG**ACTC**CC**TTTC**AATCATGGGCA**ATTC**TTCT  
TGTA**CTTACTATCTGTGCTGAGAGAGATAAGAGGCAGATT****TTTC**CCTGTCTGCACCTGCACTGGAACA  
GTGACA**GAAA**CAGACGCTTGCTTACGATAATAAG**CAAA**TATCGTACTTAGCTGAG**GGAT****TAAA**CGTAATCT  
CTCCCTT**ATCC**CCATTAATGAGA**ACTAATGTCCAC****TAAA****ACTC**GTTAATAGT**ATCC**CATA**ACTC**TGTAGT  
AAAATTGGCAACATAAG**GAAT**ATT**TTTAG**CCAAAGATACAATCGCGGTATGCGAAGTT**CAAA**CGCCCTCT  
AAA**GATA**CAAAGCCCTGATGT**ACTC**GGGATTAGCA**CAAA**CGCTTCCGAG**GGAGT**AAGCTCTTCC**GAAA**  
AGACAATAAG**ATTC**TGATCAA**ACTCCC****TAAA****GA****ACTC**TTATGCTGACAACAAGATGGCCAATC**ACTCG**  
ATTAG**GAAA**TATCAT**GGATATCC**TGA**ACTC**GATCTACTGTGGTAGCAGT**CGTCTTCTGTACAGCACATAGA**  
GAT**TTTC**TCTATCTCTCCATGACAGAA**GAAAA**AA**CAAA****ACTC**CGC**ATTC****TTTC**GATCT**TTTC**TAATTGT**TT**  
**TA**ACCACCTCTTCCGTGAGAAGAG**GGTCTTTTA**TAA**TTTC**TAGATGTGCCTGCAAAATGGAAGCTATCTC  
TTGAT**ATCC**CTGC**TTTC**CC**CAAA**CTTCTT**TTTCTAAA**GCAGCTAGATCTGAACGAGATCTCTTCAAAGCC  
TTGTAGTAGCGACTGATCTCATGTTC**CACTTCTTCTTGAGGAAGAGT**TAGCTCTCGT**ATCC**GCAAAGAAG  
A**CAAA**CCCAACA**TAAA**GC**TTTC**CCTAGCCCT**ATTC**CAGGGACTATAGGCTCCCTACAATAACAA**ACTC**  
CTGTTGCA**ACTC**CTTATTATCTTG**ACCC**GTAACGCTCATTACA**ACTC**TCC**GAATCC**AGAAT**TAAA**AACCT  
CGGAG**GAGTTTC**TGCATT**ACTC**GAGAAGCAGAGGGGCCT**TTTA**TATGAACAGCAACCTCGCCATTATAAGA  
AGCTCCTAACATAA**GA****ACTC**ATGACGCTCCTAGCGTTCACGGT**TTTCCC****TAAA**TAGGT**CAGAGT**CGCT  
TCGC**ATTC**TTTCGCTT**CGAAGAGTTTA**ACAATAGTACCAGCCGGACGCACGTGT**ATCC**CAGAAG**GGATTC**  
GTATCG**TAAA**AACTGCTGAG**GAT**TCCC**ATCTTCC**ATAAGAGGAGCTTCTACAGGCCATGAAGA**ACTGA**  
**AT****CATTC**CCCC**ACTC**ATAGT**ATTC**TTCCCTGTACGTG**TAAA**AA**CAAA**ATGATGATAAGC**TAAA****TCC**AAT  
CAAAAAAATACGATAA**TAA****ACCC**TTAGAGCTTCT**TTTC**AAAGC**TAAA**GAGAA**GAAA**AGCGTACTTTTT**TT**  
**TCTAAA**ACTAGCCTTCTAAGGTT**CAAA**AGATA**TAAA**AGATACTGTTCAGCCAG**GAT****TAAA**AACGTATGATAA  
TGACTATCAG**GAAA**GCA**TTTC**T**GAAA**TGGCAAT**TTTC**CCATGAG**GAAA**TAAGC**CAAA**ATTATC**TAAA**CGCA  
CGTTATACGAAG**GAAA**ATACTGAC**GAAT**CTTAGCATCGATGA**TAAA**ACAACGACTGTCCGCTATATCGTA  
CTGAGCA**TAAA**ATG**GAAA**TAT**ACCC**AAAGA**ACTACA**ATTATCTTCCAA**GAAA****TTTC**CCTCTACTTAAT  
AAGTCTTCTCTAAGAAGATATTGCGCTTGAGCCAAATAACGATAAG**GAAAA**ATACCAATCTCCCTTCTC  
GAG**GAAA****ATCC**ATTAT**GGATAGAAA**AAAAATGACGATACGTCTCATCTCCTAACTTAG**GAAAA**ACA**ACTCC**  
TACAG**TTTCAAA**AGGAGGCGCGCC**TAAA**TATACT**ATTC****TTTA**TA**ACTATA**CACCA**CAAA**CACATCATAA  
GGAG**GGATA****TAAA**CTA**TTTC**GCGTT**ATCC**GAACGTCCAATGGCTCAAAGAG**GAAA**AAAATGACAAATACC  
AGG**GAAA**TCAGT**ATTC**TCAAC**ACCC**AATGCA**GAAA**ACCAAAATCTC**GAAA**TAGCTCGATACGATCTGCT  
TGAGACAGACCTACCA**ACTCAA**ACC**ATCC**TCTGGGCAACCGTGGAAC**TTTA**GCAAACACTTCTTCCCAAG  
**AAA**GCGTTCTGCGCATCTGCTCGAGA**GAAA**GC**ACTTCT**ACCGGTTG**TTTA**GAA**CAAGCTGATGTTACGCT**  
ATC**TTTA**TACCACTGC**ATTC**C**TAA**CTCATTACATCGCCTATCTGCCTTAC**GGAT**AAGGCTA**TTTA**GTTCT  
CTGCTCTGTCTTCCAAAACAAC**ATCC**TAT**TTTC**ATTGGGAGCGCCTACTGGTTAGCAGGCATGCTTGCT  
CATCAAGCTCCTATCTGCTGCG**CACTC**TTGATTGTAGCGCTAC**ATCC**T**TTTA****TTCC**CAAACGCTG**CAAAA**  
AA**ACGCTCT****TTTC**CTT**GAGTACA**AA**TCAA**AGAGTCCCTCTACT**ATTC**TCTCC**TTTA**ATATCTCCATCAA

CGCATCACGCTCTGTTGCTAACTCTAAAATACAAGTGACAAAAAGGATCTGCATCCGGATATTTCTTAAT  
AAAATAAAACTCACTCACCGCTATTCGGAACAGCTCTTTCTTAATAAAGGAAAGATAAACAATCCATC  
AAAACCTCCCTTGCTCCATCAATTC TACTATTC CACTTAGTGAGCATAACCGTGTATCACTTAGAAGGCTG  
CGTATCTAAATCTTCATGCCCTATTACTTTTCGCTCATCAAACTTAATAATACACCCACGCAATCCCTCT  
ATTTTCTGAGAAAATCTTCGAACTATTCCTCTTCTTATTCTCAAAATAAATAATTCGATTCTTTCTTCATC  
AGAGGATCCCAACCTATTTTCAGACAAAGATATTGGTCGATTCATCCAGTTTAATCCCTTGGCACTCC  
CCTCTCTTACAAACAATAAGAGCTATTCAAAAGCAAAAGGATGTGCCATCTTTTTCGTATCAGGATGG  
CAATTC TCACTACAAACAATACCTTCTTCTTTTATTAGGAACGC TTTCCCCAAAAACGAGGTCTCT  
GGGTCTCTTTCTACTCTCTTCTCAAATTCGTATTC CCAACCTCTCCCTCTGTAATTAAGGACCTGGTT  
CTCTAGTATTCATTC TGCCTGGCTCCTTTTC TATAGGACACTGCTCTAGCCTGAATCGACTAGGTATT  
AGT TTTATTTCAAACTCGCTCTTTTC CCTATATCATCCCCAGCGTAATACTCAGTTT TTTAGCGACTT  
TAGGCATTTTATT TTTCCAAATACCGCTATTACGTTTC TTTTACTCTCCCTGGGAATCATTATTCGGCAC  
TCGTTGGTTTCCTTCCCTCTTCGGCAAAATATTCACAACCCATCAATCTCTCTTGTGCCCAGCTTTT  
ATCGTTTTC CCAATGATTCGAATGTTCAAATTC TCCC TTTAGATGGACTTATCTATAACCTGTTCTACC  
CTACACTCGTTATGCCCATCTTCCCTATGATTC CTTTATCATTC CTTAATCC TCTCTATCACACCTCTC  
TGAATCC TACATCTCCTGGATCC TTGATCTTCTTGGCTACATGCTCCAACGTCCTTATCTCGCTTACA  
TCAGCTCCCCGAC TTTAGAGTGGATAACACTTGTCTCTATTATTC TTGTTTACATAGGGGCTCTATCCT  
CTGTGCGGAAGGCTGTAAATACAGCTGTAGATCACTCGATTATTC TCTAAATCTGTTC TAAAAAAAAGCG  
CTCCTGT TTTATCACTAGGAGCGCTTCAAATGGAAATGTCACCTGTATAGTCTAAA ACTCTGCCAGTAGT  
CAAACTCTTGGAAAGATTT TTTCTTCAAAGGTAGCACCTCAT TTTCAATACCTTAGAGTAAGGAACAG  
GAGCATGCAACGCTCCTATCCGCTTGATAGGAGCGTCAAGATATCTGTAAGCTCTCTCTGCTACCAAAGC  
AACCAGTTCACTACCAAACCCACAAA ACTCTGAAGCTTCATGAACAACATAAATCTCCCTGTTTT TTTA  
ACTGACTCACATACAGTAGCAAAATCACAAGGAACAATCGTTGCAAAATCAATAACTTCAACAGAAATCC  
CTAATTC TAATAGATCTCTGGCCACCTCTACGCTCATTACTAGAGAC ATTC CCAAATAAATAAGTTAA  
GTCTGTACCTGGATGCACAATACGTGCTTGTCCGAAAGGAAGAACAATAATCAGAAATAAATACAGGCTC  
GTACTAAATAAACCGCGTTGATACAAAGCTTTATGCTCTAAAAAATACCACCGGATTAGGATCTCGAATAG  
CAGCTTTTAATAAAGCTTTTAGCATCCGCAGCATTGGAAGGATAGACCACCTTTAATCCAGGACAATGAGC  
AAGAAAAGCTTCTATATTCCTGGGAATGATATGGTCCGCCTTGAATATACCC TCCGCAAGGAGTCTTATT  
ACAATGGGCATTTCCATTC TCCGGCAGAGCGATAGTAGATACTC GCTGCTTCAGAAAACAGCTGTTGA  
TACCTGGCCAAATATAGTCTGCAAATTTGAATCTCTGCAACCGCTTATAGAAAACCATCAAAGCCATTC  
TACAGCAGCTCCGATAATAGTGGCCTCTGCTAAAAGCGTAT TAAAACATCGGT TTTCTCCGAAT TGCTCT  
GTCAGAGTCTTGTAAACGCCGAAAACGCCTCCCTTATTTCTGCGAC ATCC TACCAAAAACAACACTACTC  
CAGGATCTCTCTGCATCTCTTCAACTAAAACCTCTGTGATAGCGTCACGCATAACTC TAGGCTCTAA TTT  
CTGTAAGGAGGCAGTTTC TAATGCATTTTCATAATCTATTAAGGAAATATTGTAGGGAGCAAATACTTCG  
TGCAAAAGTTGCTCCAAAACAAGGAAAAGGAGCAGACTCAGCAAGCTCACAAGCCTGATTAACAGTTTC TTT  
GAAGCTCAGCC TTTACAAACTCAATCACCTCATGCGCAACCCAAAATCATCAAGCAGAGACTTTCTAA  
ACGCACCAGAGGATCTTGGCCTTGCAACACGATAAAA TCTTCTCTGAACGATACTTGGCCTGATTATCT  
GAAT TACTATGAGACTCTAACCGAACGACATTGACAATAACAAGAGCCGGAATATGTGGTGTCTTGCAT  
CAGAAA CAGCCCGCTCAAAGTCTGTGTCAACACAGATAACATCTCCACCGTCAACCTCATAAGTAGCCAG  
GCCTGAATAACTATTACC TAAAAGTACCAGATCTGCGCCACATTGGTCAGCAAAAGGAACGAAA TGGCC  
CACTGATTATCAAAATATGGCTATCACTAGAGGAGT TGATGCAGAGATGCAAAATTCAGCATCTCGTGA  
ACTCTCCTTGAGAAGTAGATCCATCACCGCCCGATACATATACAACTTC ACTCTTCCCAGAAATCTTAAAC  
ACCC CAGGCACGCCCCGAGCCTGCAAAAACCTGTGTACCAACAACACTAGACTGACAGCATATACGAAGC  
TT TTTATGGGAATAATGGTAAGGCATCATTC TACCAGCAGAATGATTC TGTGTAGTCCGAGCCAAAAAAG  
AAGCGAAGATTTCA GAAAGATCGCATCCCAATCC TAAAAGGAATCC TTGATCC CGGTAATAAGGAAATGC  
CCAGTCC TTTCCGGAATCAAGCTTCAAACAGCCACAACACCTGCAAGCTCATGACCAGCGCAAGATAAT  
TGAAGAGGCCACCGGAACCACTCTGGCGAGATAACAACAACATCTTCCGCTCTGAGAACTCTCAAAGTCC  
ATGCCAACCTGAATACATTC TCAACAGCAGAGTCTAATTGGTATACG GAGTGTCTCACAGCAGCTCCCTC  
TCAGCTAAAAGATCC TTTCTTATACAGCAAAGTCA GAAAATAAACC CAAAATCAA TCTAA GAAACT  
CCGTTTC TTAGGGAAATTTTCAGCCTTCTCCGTAGCAGAACTGTCTCAATAAA TCTTCAAATTCATTA  
GATAGGTGCTGGGGAGTCTCCACAGATACTCTTAC TAAAAGATCTCTCTGGATTTCCCATGCACATTGG  
GGAATCCCTGCCCTCTAAC TTTAAGAAGTGTCCGCTCTGAATCCCTTCTGGGATACTCAAACGGCAAGT  
ACCTTCC TTTAAGAGTGTGGGATTTCTTCTTGATCC TAAAAGCCGCATCAACAATCCAATAGGAAGC

TC TAAA AC TAAA TC ATCC CCATGGCGCTC GAAA ACAG GATGAGGCTCTACATCAA TAAA AACATACAGAT  
CCCTGCAGGCGCTCCAT CAAA GCCAGCATCTCCATAGCCTTCCATC TTTAATCTC ATCCAGAATCGAC  
TC CAGCTGGAT ATTAACATGGACGCTACG TTTA TCC TTGATACGTCCCTGCCACGACAACTGAACAA  
GGAT CTGTGATA ACCC GACCTTACCAC TACAATCAGGGCAAGTAGAAGCCATGGA GAAA AAGCCTCGAC  
CAAA CACTACCTGACCAGAGCCCTTGCATCGATCACA AACT TTTA CACC TTTA GCAGTATTGGCTCCACT  
ACCAGAACAAGCATCACAAGA TTTA TAGCCT GAAA CAAGAAGTTC TT TTTCAACACCT CAAA CCGCCTCC  
TCGAAGGACAGCGTAATATGCACCTTCTTACTAGCTCCTTGTGCGAGAAC TTTT TGAGCCTCCACGC ATTC  
C GAAA GCTTCTCCAAGTCTCTCAAAAAGCCCTTCAA GAAA CCGCCTCCATTACCACC GAAA TCGCCGCC  
AAAAGTCCCA TAAA TGTTGCAAAGCGTCTTCCAT ATTC CCCATGCCAGCACC GCC GAATCC TCCAGCA  
CCAGCAAATGGACCGTC CAAA CCGTAACGATCATATG ACTC TCGCTTCTGCGCATCACCTAATACTTCAT  
AGGCTTCA GAAA CTTT TTTAAA GCGTCGCTCCGCTT CAGCATCC CCA GGATTC TTATCT GGAT GGTACT TT  
TA CAGCGAGCTTACGGTAAGC TTTCTTTATTTT TFCAG GAGTAGCAGTCTTCGCTAC ACCCAATATCGTG  
TAGTAATCCATGAC GAAA CACCAC TAACAAAGATTT TTTT TAACGACCACGATA CAAA GCTGCCGCCCTTG  
GAT CAAA CTCGTTTT TTTACAGAAGG CAAATCGTAGAAT CTATGAGACTTAGAAGT TTTT CAAAATTC CTT  
C CAAA TCGATTTTT TTTCTTTAAAATTC TTAGAGCTCGATCTATAGGCTCTCCA ACTC TGAC TTTA ACACT  
GGGCAT GAATAACCTTAATACGTAAT TGGTT TTTATTTAATAACGCGCGCCTAGCTCGAACGCACAAGAG  
ACCGG GGAT TGTAACACCACT TTTATTTAGGCTTCAAGAGATACTTAGGTTGTATAACCTTCC AAAAAT  
ATAAAA AATTGCCAAAATAAG TAAA CAAA ACTC TT GAAA AGTTGTTGTCCAAAAG GAAA AACTCT TAAAA  
AAGGAAGAGATGCTCCGGTAATC TAAA CACAACGGAAGAT CAAA AGACAGAACA AACTGC GAAA CAACGT  
ACTTAC GGATTC GATCGATACAAGGAACCACCTTCC T TACC GAAA TACGCGAA GAAA ATAGTTCTAC GAA  
ATACGTTGGATCC GGAGAGATCACATGACAAC ATCC CTTATCTAAA CAATACTCTAGAGCTTCAGAATAA  
GACAA TAAAATTC CCG GAGTAGAAGTAGTATCTGTAAGCAGAAA ACCATCAAGAGAAA GCTCTGAG TTTA  
AAGCTACAACCC CACC TTTT CCTAGAGGCAAAGCAAAGCCTCCTCTTCTTG ACCCAAAGAAA GATA  
TCC TTT TAAAAGAGCTATAGCCAAC TAAA GGGACATTT TTTAGCCAGAGAGAGCCCTTGAGCAAAGCAACT  
CCC ACTCTAGTTGCA GAAAATCC CCCGGGACCAACAGAG ACTC CAATACCTTG GAAA GGCAAATCCAGGC  
TGTT GAAA ATGAAATTTA ACACA ACTC CTTGATCTGGCCCTGTAGGCAAAGACCATACTTC TAAA ACATC  
TCGACAATCGACATAGGCCAAAACGGCTGAGAACC GGAAGTGTCTACAATAAAAATA CAAA TACACAGCC  
TAAA CTCCTAGATTGAT TTTAGACAAA GGAT TATAACCGT TAAA ACCGT TTTAATTC AAAAATTAATTCGC  
TGTCGCCAAATCAAACCGAC TTTA C TAAAAAA ACTC ATTTA TAATTCGATAAAA TAACAGTT TTTT TATT  
CAACTTCTC CAAA CTGCAATTGAT TAAA AACCCTGCTATACT TTTT CCGTGTTAGATGCACTAATTGTTGCG  
AT CAAA TAGTATATCGGTAAGAAGAAGTAATAT TAAA CATGTGCACACA ACCCTTGCTCTTCCAAGGATC  
AAA AACTAGTTGCCAAGGACAATTGTGA ACTC GAC GAATAATACAG ACTC TCAAATCTAG ATCCAAAT  
GCTTCAGAGGTC GAAA AACTTCTCGAC GAATCC GCAGAGGCAGAAGA GAAA GTAGATGATCATA CGCCCC  
CTTCAGA ACTT TTTA TTC TCCC CAAA AATAAGCGTCTTT TTTT CCTGGCATGGCAGCCCCCTCTCTTAT  
AGAGGCAGGCCCCATTATGAAGTACTTACACTATTAGCAAATC ATCCCA GAAA CACATCGGTCTTGTC  
TTAACAAAAAAGAAGATGCCAAC ACTC TAAA AGTTGGT TTTA ATCAGCTTCATC GAGTGGGCGT ATCCG  
CGCGCAT TTTA CGCATAATGCCTATTGAAGGCGGTAGCGCTCAAGTGTATT GAGT ATAGAAGACCGTAT  
TC GCATCGTTAAGCCA ATTC AAGATAAGTATC TAAA AGCCAAAGTCTCCTATCACAAGAGAACAAGAG  
CTGACTGAAGAGC TAAA AGCTT ACTC AATTAGCATCGTATCGATTATCAAAGATCTTC TAAAAC TAAACC  
CTCTGTTCAAAGAAGAGCTACAAAT TTTT CTTGGCC ACTC TGA TTTT ACTGAGCCAGG GAAA CTCGCAGA  
TTTC TCCGTTGC TTTA ACTACAGCAACACGAGAGGAACTTCAG GAAA TTTAGAAA CCACAGACATGCAT  
GATCGCATAGACAAAGCATTGGTCTT ACTC AAAAAA GAGT TAGATCTAAGCCGTCTGCAAAGTAGTATCA  
ATCAAAAATTTGAAGCGACCATC AAAAAAGTCA GAAA GAAT TTTT C TAAAAGAACA ACT TAAA ACAAT  
AAAGAAA GAGT TAGGGCTAGAGAAA GACGATCACGCTGTTGATCTTGAGAAG TTTA TGGAACGCTTCAAT  
AAA CGAGACGTTCTCAATACGCCATGGACGTT ATCC AAGAT GAAA TGGATAAA TTACAAACCTTGAGA  
CTTCTTCAGCT GAAT ATGCAGTCTGCCGCAACTATCTCGATTGGTTAACTATTGTACCTTGGGGC ATCCA  
AACCAAG GAAT ACCACGA CAAAAA GAAA GCAGAAT CTATCT TAAATAAA GACCATTACGGTTTA GAAGAT  
ATAAA ACAACGC ATTC TT GAAT TGATTAGTGTAGGCAA ACTTAGCAAACGGTATGAAGGGAAGTATTA CAA  
ACCTAGTGGGGCTCCAG GAGTAGG GAAA ACAAGTATCGGCCGAAGTATTGCAAAGGTGTACACCG TAA  
ATTC TTCCGGTTCTCTGTAGGAG GAAT GCGTGATGAAGCA GAAA TCAAAGGACATAGACGGACCTATATC  
GGAGCTATGCCAGG GAAA CTTGTGCAAGC CAAAAA CAAAGTCAGATTAT GAATCC TGTGATCATGATTG  
ATGAAGTCGA TAAA ATTGGCTCTAGTTATCACGGAG ATCC AGCTTCGGCCCTTCTTGAGGTGTTAGATCC  
CGAACAAAACAAAGACTT TTTA GATCATTAA CAAA GAT GTCCGCGTAGA TTTA TCTAACGTGCTCTTCAAT



CTAACGCAAACGTATTAGATTCATCCAGACCCCTACTGGACC GAATGGAAGTGTGCGTTTATCTG  
GTTACATTCGGAAGAAA AATTACAGATAGCCAC TAAA TACCTCGTACCTCGCGCAAG GAAA GAGATGGG  
AC TTTCTGCACAGAATGTGAC TTTCAACCAGAAGCTATCAAGCACATGATCAACAACCTATGCTAGAGAA  
GCTG GAGTTCGTACACT GAATGAAA ACATTAAGAAA GTCTTAC GAAA AGTAGCTCT TAAAATTGTTCAA  
ACCAAGA GAAA AATCC TTCCAAGAAGTCGCGGTTTACAATCACGCCAAAAAATCTACAAGATTATCTTGG  
CAAACCAGTCT TTTCTAGCGATCG TTTCTATGAAA AGACTCCGGTAG GAGTTGCCACAGGCCTAGCATGG  
ACTTCTTAGGAGGAGCAACCTTGTACATAGAAA GTGTTCAAGTCCCTTCTTCATCAGG TAAA GC GGATA  
TGCATCTAACAGGTCAAGCTGG GGATGTGATGAAA GAGTCTTCACAAATAGCTTGGACCTATCTTCATAG  
TGCTCTAGAAGTTATGCTCCAGGACAACC ATTC CAAAAA AATCGCAAGTCCAT ATCCATATCC CAGAG  
GGAGCC ACTCCAAAAGACGGTCCCTCTGCAG GAAT TACTATGGTAACGTCTTGC TTTCTTTA CT CAAAG  
AT GTTCTGTGCTTAATAACCTCGGCATGACTGGAGAGCTCACCTAACAGGCA GAGT TTTA GGAAT TGG  
AGGT ATCC GG GAAA AACTTATCGCAGCAAGAAGATC GAAATT GAAT AT TTTA ATCTTCCCTGAAGATAAC  
CGTCGAGATTACGACGAGCTCCCCGCATACCTTAA GAAA GGTCTCAAGGTACACTTCGTCC ACC ATTATG  
ACGATGT ATTC AAGATTGC TTTCTCTGGGG TTTAAA TCGTGTCTCTGAGCTGTAAGGCTCAGAGAACCT  
TCTCTTT ATTC TCAACAAATCAAAG TTTAGTATAATCCGCCTTCGAGACA ATCC AGGAGGCTATTATGC  
AACTTCGGTCTATT ATTCAGTC TTTCTTCTCC TAAA GCTCCCCCATCTCCACT TAAAAACCTA TTTA  
TCAACAAACTGAACGCATCATCAATATAGCTTATCTTGTCTGTT ATCCCTATCTGTTGTAGGAAT TATC  
TCTG GAGTATTC TTTCTCTTAGCTTCCCCCTATTAGGCGCAGGCA CAAATTTA ATCTCT TTTAGCCGTAG  
GTTCTGCTACTTGT CAAATTTCT CATTGCTCCC GGATATT GAAA AAATAATTGCTCTAAGAGA ACCCAA  
GGTCTCGATTACAAC TAGCTCCCCATTACCAACATTAATGCGCTCCTTCAAATCGATTGGCCTTG GAAAA  
GCAGCTCATTAGCTATCTGATAAAA AGGAGATC TTTCTGTACAAGCTCTCCTTCTGT GAAA GCTTCTTATC  
CTCTCTTA TTTATAAAA ACTTTTAACTA GAAA CTC TACCTGTTATCACCGACGAGCTTCT TTTACTCA  
TAACGAGCTTTTTCTTGTG TTTAGGCTTAGTGGAAGTTATAATTT TTTCTCT GAAA CTGTGGAGAGACATA  
AGAAA TTAT TTTCAATTC TCGTCTTA TTTATATC CAAA CACATCC CTAC ATTC CAAAACCTCTTACCTTGC  
AAGCAAGAGGAAGTCGTTGTTAGGGCATAAA TGAT TTTACCTTGAGAGATCTCTTCC TAAA GAGGATA  
TT GAATGAGT TATCGT GGAT TAACT ATTC TAGGCTGTTCAAGTCAACAACCG ACTC GTCACCGTAATCAC  
GGAGCATATCT ACTCCGTTGGAAT GGGGAAGGGCT TTTACAAA ACCAGGAGAAGGA ACTCAACGTCAAT  
TCATTTACGCTAATATGCCCCACGGTAG TTTCTCGTATT TTTCTATTAGTCAT TTTCTATGGAGACCATTG  
CTTAGG TTTAGGTTCCATGCTCATGCGCTTAATCTAGATAGAG TTTCTACATCC TATACACTGCTATTAC  
CTTGCTTCAGG GAAA AAATA TTTCTGATAGACTTCGCTATAGCACTATCTATCAC GAAA CAAT TAAA GTTA  
TAGAGC ATCC TATCGATCGTGAAGGTATCGTAGAAGAT CAAA GTAAT TTTCTGAATAGAATCTCGCCAAC  
AGACCATCTTGTGAC ACCCTAGGGTGGCGCATTACAGAGCCTGATACAACAAA TTTATCCCT GAAAAA  
AT TAAA GCAGCAGGCTT GAAA GGCCCTATCATGCAAGAGCTCATCAATAAGGGCC GGG TAAA GGTTAATG  
ACACTATCGTCCA CAAA GACGATGTCAGCTATACGCG TAAA GGAGACAGCATTGCTGTTGTGCGGATTC  
CCTTCTTGCCAAGCTATTGTGCACTTAGCAA GAAA TGCTCGTATCTTATTATGC GAAA GTACCTA CAAA  
GAAGAAC ATTC CCATCTCGC TAAA AGTCATTATCATGACTGCCAAACAAGCTGCGGAACAAGCAAAGC  
GCGCAGAAGTGCAACAAC TAATTC TCACACATT TTTCTGCACGCTACAATACGACAGAA GAACAAA TCCA  
AGAGGCTGGA GAAA TT TTTCTCCAATGTA CAAA CTGCAGAGGAATTC TGTAGCTAC GAGTTCCTTAAA AAC  
CTTAGTTAGCGCATATACTGTTG GAAA CAACCC GAAA GCTTCTTAGCTCATAAGTACAGCAGG CAAAGGA  
ATGATTAC ATCC TTTATGCAATTTTATGATTACC TAAAAAATCAT GAAA GCCTCCTCCCTTCATACATTAA  
GAAA TTACTGTAT GGAT CTCAGCTCTC TAAAATGTTT TTTAGAAA AAAAAAGCGATCTATCTCCA ACTCC  
CCCCCTCTCTCCACGACAATACTACGACT ATCC TCCTCTCTC TTTCTCTCTG TTTACCAAAGACAAC  
ATCC GTC TTTA TCTTCTAGAACAAATCC AAACGCATC ATTC AAAGCGCACCGTACGCCGTCGACTATCTG  
CTAT TAAAAGT CAAA CTAGAT CAAA CG TAAAAAACCAGTTAATACCAGAGAATCC AGCG GAAA TGATTCCG  
AGGGCTCGCCTTCCCCAAGA ACTTCCCTCCCC ACTCACCTACGAACAAGTCTTGGCCTAATGGCTGCT  
CCAGAAT TAGA TAAA GTTACAGGATTC CGAGATCGCTG TTTACTC GA ACTCTTCTATAGTT CAGGTCTAA  
GAAT CAGCGAGATTACCGTCT GAAT CGTGCTGATATCGA TTTCAATCACACCT TTTACAT ATCC GAGG  
GAAA GG GAAAAAAGAAC GAAT CGTTCCTATGACAAAGGTAGCCGTCCAGTGGTTACAAGACTA TTTAAA C  
CACCAGATAGAGCTCTGTAGAACA GGATCATCAAGCTTGT TTTAAATCGA CAAAGAAA ACCTCTAT  
CTACTC GCTCTATAGATA GAAA ATTC CAACAATATCTCCT TAAA ACAGGATTATCCGGATCTATTACTCC  
TCACACA ATCC GTCATACTATTGCC ACTCACTGGTTAGAGCGCG GGATGGAT TTTAAA AACCATTC ACTC  
CTGTTAGGCCATACTTCTCTTGGAGACGACAACCA TTTA TACTCATG TTTCCAT GAAA TAAA AAAAAACAGA  
TCCACGAT GAAACTCACCC TCACAAC TTAGAG GAGT AACTACACGGCAAACCTCTTGT ACTC TAAGAAG

GTC CAAA TTATCC TCAAA TCCAT GAGT ATTGTTCTTGA TAAA ATCGG TAAA ACATTAGGGACAC GAGT CT  
TATTC GACGATGTGCTGTCGT ATTC ACCCAGG GAAT CGTTACGGCTTAACAGGCCCTAATGGAGCTGG  
GAAA TCCACTC TAT TAAA AATTATTACAGGCTTGGTAGAACCTTCTCGAGGAACTA TTTC CTTGCCAAG  
AAGATTGGTAT CAAA CGTCAAAATATCGATAGCTTCGGTGACGTGATCGT TTTA GATTGTGTGATCATGG  
GAAA CTC TCGCTTATGGGAGGCTATGCAACGTGAGATGCCTTATACGCGGAA GAA TTTA CCGATGCTAT  
AGGAATGGA ACTC GGT GAAA TTGAAGAGATCATCGGCGAAGAAGATGGTTATCGTGCA GAGT CTGAAGCT  
GAA GAGT TGCTTCTAGGTATTGGC ATTC CAGAA GAAT TTTT TCTCA GAAA ATGGCTACT ATTC C TTTAG  
ACTTACA ATTC CGGTCCTCCTATGCCAGGCTCTG CAAA GCC ATCC TGAAGC CAAA CT TTTA GATGAACC  
GACTAACC ACTTAGACTTAC ATTC TATCAATTGGTTAGGTAGT TTTC T TAAA GACTATAACGGCAGGTT  
ATTGTAGTTAGCCACGACCGCCA TTTC T TAAA TACCATCACAACACATATCGCTGATATCGATTACGATA  
CTATCATTATCT ATCC AGGCAACTATGATGCCATGGTT GAAA T GAAA ACAGCCTCTAGAGAGCAAGA GAA  
AGCTGACATCAAATCAAAGA GAAA AAAATTGCGCAGTTGCGA GAG CAAATAGCCAAA CAAA GTGCC GGA  
TCGCGGGCAAGTCAAGTGCAATCC CGTCTGAGA GAAA TTAAGAAGCTGCAACCTCAAGAGC TAAA AAAAT  
CTAAT ATTC CAAAGACCTTATATCC G TTTC CCTGTGTCAGATAAAA ACATCTG GAAA AGTAGTCT TTTC TAT  
AGAAGTATTAGCAAAAACATATGATGCAG ATCC CAAA TTGTTCA ACCC CTTCTC TTTAGAGAT TTTA TCAA  
GGGGA TAAA ATTGGCGTGATTG GAAA CAATGGGT TGGG GAAA ACAAC TTTA ATGAAGTTGTTGGCAG GAG  
TAGAAC AACCTTCCCAAGGTCAAGTCAAGTTGGGGCATAATGTAGCCT TTTT CATA TTTCCCTCAAACCA  
CGCTGAT ATCC TGAA GGAT TGTGGCGAA GAAA CACT ATTC GAAT GGTTACGCAGACG TAAA ACAG GGATT  
ACAGATCAAGAGGTTCAAGCGTTCTTGG GAAA ATGCTC CAAA GAGGAGATGACGCC TCAAACAAGT TA  
AAGC CAAA TCCGGAGGA GAAA CGGCTCGGTTACTAATGGCCG GAAT GATGCTAGA GAAT CACAATATGCT  
CATTCTTGATGAAGCGAACCAACTTAGATCTT GAGT CTG TTTC CGC TTTA GCTTGGCCATTAATGAC  
TACCC AGGACAGCTATT CAAAT TTC CCATGACAGAACACTAATAGAT GAGT GCGCGAC TAAA CTGCTGA  
TCCAAA ACAAGGGA ACTA TTTC CTT TTTC GATGGCCGATGTCC GAGT ATTTA GCTAGCCAGAAA AAA TA  
AATCGCTCATTGTAAGCAGGAAA TAATTG GAGT CACGTGGAAGCTCGTTAGT TTTA GGATCTTCGTCAG  
AAA GAA GAAA AGCTGT TTTA GAGAGC TTTC GTATTC CC TTTACAAA TGTATCTCCAGAT CAAA ACGAAGC  
CAGTATTG TTTA TTC TGGAGATCC TTTC AAGTATACAAAGGA ACTAGCTTGAACAAAGCTAACGTTGTG  
CGCTCTCAAGGGT TTTC AGATGC TTTA ATTATCACTGCCGATACCGTTGTTG TTTATAAAGGAGAGGT TT  
TCAA TAAA CCTGAAT CTGAAGA ACATGCTGTGGAGATGTTGCGT ACTC TTAGCGCTCTTCTC ACTC CGT  
CATCACTACGCTTGTCTTATGCAAAAAT GAAA AAGTGTGCTGTCGGCATCAGAAA AT ACTCAAGTCTC TTTC  
ATTGAC ATCC CCCCCGAGCATCT TAAA ACCTATGTCCGATCTT TTTC CTCTCTGAAGCGATGCGGAGGAT  
ACTGCGTACAAGATGGTGGTGGGT TAATCATCAAACA AATAGAAGTTGTGTATATAATATACAAGGATT  
GCCTA TAAA GACGCTGAACCAGTTGCTCATGGAG TTTA ACATCAGCTTATGGGACTATCTCGTCTAGCCT  
TCATTGG TTTC CTCTCT TTTA ACTC TCAGCCAGCTGTGAT TTTC CTTCTCAG TTTC TCAGAAAT CTT  
GT TTTC TTGCCAAAATCAGTCCCTCAAGCTCTAGAAGCCTATCTCGAAGCTTCAGTA ACTTATCAACAA  
CACGA TTTC TCCGTATTACGCGTAATAGCAGAAT CGTA TTTA CAACAAAGC TTTC TCTCTGAGGAC ACCC  
ACATACG TAAA AGTGCAATTATTGGAGCAGGGCTATCTGGTTCATCAGAAGC TTTA GAGT TACTGTCTGA  
GGCTATA GAAA CGCAAGATCTCTATGAGCAACT ACTC AT TTTAAA TGCTGCAACCAGCCAATTAAGCAA  
ACTTCTGACAAACT TTTA TTC AAG GGAT TAACAGCTTCTCATCC TGTC ATCC GCTTAGAAGCTGCTTATC  
GTCTTGCTGTAT GAAA AATAGCAAGGTAAGTGATTACC TTTA TTC TTTA TCTACAAGTTACCAGAAGA  
AATTC AAAACCTAGCGGCAACTAT TTTC TTACA ACTC GAAA CAGAAGAAGCTGATGCTTAT ATTC ATCGC  
AAA CTCTCTTCTCCCAATAACCTGACAA GAAA CTATGTTGCCTA TTTA ATTGGA GAGT ACAAAACAAAAA  
GATTTTC TTCCAACACTACGCTC TTTA CTTACAAGTGCCCTCTCC TTTA GATCAAGAAGGCGC CAAA TATGC  
GTTAGGCAA ACTGGAAG ACTC TGGTAGCT ATCC TAGAAT TAAA GCTCTAAGCTCTAG ATCC AATCC TGAA  
GTAGT ACTC GCTGCAGCTCAGACATTATT ATTC TTAGA GAAA GAAGAAGAAGCTCTACCG ATCC TAACCA  
ACC CAAA CCAACAAAAACTTCTTCGAGCCCTGTATACCGCACG TTTC CTCTCGCAAGAGAAGGGT GAAGA  
GCTTCTTCTTCCAATCT TTTA TAACGCAACACAAGAA GAAA TTAGACT GAAT ACTGC TTTA GCACTTGT  
CATCAA GGGTGTACAGATCC TCAAGTCCCTCCACTATCTAACAGAAA TCTTAGAAA G TAAAGTTCTCCATC  
GCATATT TTTA CCT ACTCACTC GACAG GAAA AGCTATACAGTTCTG GAAAGAAT GCACCACT TTTC CTCT  
CATGAGCCAAGAAGACAAAATGAGAACGTTGGCTATGTATC GGGT AGCGGAAGATACC ATCC TCTCAGCG  
TTAC TAAA ATT ACCC AATGACGCTATCTTCCCTTACCTAGAGCGC ATCC TCGCCTCACAAAAACTATAC  
TAGCAGC TAAA AGCTATTGCTTT TTTA TCGGTAACAGCTC ATCC TCAGGCAC TTTC TTTA GTCTC GAAA GC  
TGCATTA ACTC CTGGAG ACCC TATC ATTC GCGCTTACGCTAATCTAGC TTTA TATACAATGACCAAAGAT  
CC TGAA AAAAGCTGTGCTATAACCGATATGCTGAACAATTAATAGA GGAT ACCAT TTTATTC ACAGATG

CTGAAAATCCGCTTCCCTCTCCAAGCTCTTCTTA TTACGCTACCAAGTATCCCTTGAGACCCGCACACA  
ACTTATGCTAGCTATCAAAGAAACCTTAGTTTC TTCCAAAACGGATGAAGATATCCGCGTT TTTCTTTC  
CTAATGAAAAAACCCATTACAAAAATATCCCGATCTTATCAGGATGTTAATGAGAATAGTGAGTGAT  
CTGGAGTGAAACGATT TTTCCACTT TTTATTG GAGTGCTGCTCGGCACAC CAAA CCGTCAGAAGGTC T  
TTTCATCAACAAGCTGTTCAAAAAAAA TTTCTTATCTGAGCCAT TTTAAA GGCATTACAGGAAT TATG  
GATGTTGAGGATGGGTATTACATATCCATGATGATCTACGTCTTCAAGCCAA TAAAGCCTATGTTGAAA  
ATCGCACGGATTGTGGATCAAAATCGTTGCTCATGGCAACGTTATGGTCAATTATCGCGG GAAAATTT  
AATCTGTGATTATCTT GAGTACTATGAAGACACAGATTCTTGT TTTACTCACCAATGGCCGCTGTTCTGTTA  
TACCCATGGTTCATTGGAGGATCCACTATAACGATCTCACCATCTTCTATTATCATTCA TAAAGGGTATA  
TCTCGACTTCTGAAGGTCCTCAGAAA CATA CAAATTTATCCGGAGATTA TTTAAA ATACTCTTCAGACAG  
CGTATTATCTATGGGACCCCTCAGTCT TTTCTATCTGTAATACGCCTGTGTTATTGCTTCCCTCAAATCTCC  
ATTATGCCTATGGAGATTCCTAAGCCTCCGATTACT TTTTCGAGGTGG GAGTGGAGGATTTCTGGATCCT  
ATTTA GGTGTTAGTTATTC CCCC TATATC TAAA AAGCATTGTTCTACGAC CAAA TTTCTTGGATAGTTTTT  
TAAA CATGGAATAGGTCTCGGCTATAACATGCGCT TTTCTCTCAG GAAAATCC AAGCAATGCCA TAAAT  
AT TAAA AGCTATTACGCACATCGATTAGCTATTGATT CATCAGGAGCAAAAGATCGCTATCGATTACATG  
GAGACTTCACTT TTTCCAAAGAACGAGCCCATCTTGCTGGT GAATTC CA TTTA AGTGATAGCTGG GAAAC  
AGTTGC GGATATCTTCCCAAATAACTTCTC TTTAAA AAATACAGGCCCTACAGAAGTTAGCCTATCATGG  
CGCGATAACAA TTTACAAAGGAAA ATGACTTCCCTGTCAAAGTCA ACTCC TTTCAAATGT TAAA CAAG  
AAT TGCCTCAAGCAATTC TTTTATCACCAGCAGTACGTATCAGGCGCTCTCGCAT TTTCTAGAGAATCG  
CTTAGAAGCTGGTTT CAAAGATTTTC A TTTT AGTAGTAATATTC CAGGCTCTAACTTCTCATCATGGAGG  
TTCTC ATCCGCTCACAAAGTCTACTGTGGGCTTGTCTTCTTATAGGAACGTTAACCCCTTCGCTATCTG  
GAACTGCTATCTACTAT ACCCGCATGCTCTCCCCAAATGCAGCCATTGTCAATTATCT GGATCGCTATC  
T CAAA ATTATCGCGTTGCTTTA CAAAA GAATATCGGCATGCAAGACATATTGTAGAGCCTT CAAA CTCC  
TT TTTAAA AACC ACTCGTCTGTATT ATCCTCTGATGAGCCTCATAT TTTTC TCGAT TAAAGATGCT TTTTC  
ACTCTATCAACCTTCTACATGTAGGAT TGGAGTCAAAGTCT TAAA CAAACATTC CACTCTTTCCACTCC  
TTCGCATCT GAAA CTATGGACGACCTATATC CAAA ATGAACCTCACGCTAAGGACAC TTTCC TAAA ACT  
GCTTGTGGTTCTCTCTTCTCTTAC ACTCCAAAATAC TTTATCC TTAGATGCG GAATGGACAAAGAAAA  
AAAGCCGATGGGAT CATCTCAATGTAATCTGG GAATGGAT CAAAAAT GATAATCTCGGTCTTAC TTTAGA  
ATT TTTA CATAGAAGTAAGTATGGC TTTATTAAGTGCCTAAA GATAACTACACACTCGATGTAAGCCGA  
TCT TTTA GACACATTACTAGCCTCTCCTC TTTTC CGATCGAAGAAACAAA ATTACTGGCAAACCTT CAAA TTC  
GTCCACATCCTCATTGGAATTATAATCTTAATCTTCTGTTAT GGATGGCATCGTCCAGACTCTCCATCCTA  
TTTGAATACCAGATGATTC TGGGT CATAAAATC CAAA AGCACTGGCAGCTATTC TCTGTCTAC GAAAAA  
CGTGAAGCTGATAAGCGCTGCTTCT TTTATC TAAA ATTAGATAAA C GAAAACAGAAA CACCGCCATCCTC  
AAA GATAACAAAAAAACCAAAC TAG CAAATCCAACCAG CAAA GTTTTT TTTCTTATCGAAGCCTC TTTTC  
TACTAGAAA ACTTATTC TTCAACATCTT GAAT TAAA TCTTCAACATACTGTGAGGAAGAGGCTCTCTAT  
TCTCTCCCTTCCC TAAA TAGCTTGTGGCAAATGATAAGAT TAAA CATCC TAAA CAAAAGCTCCAGCTAA  
CCAAGCGTTACCTT TTTCAAAA TTTCTGGGGTGGATACTC CAAATACAGAATCTCCGGAATCGACACCG  
AAA GAAGACCC TAA TCC CGTGTCTTACTCTCTTGAACAAGAACAAGTCCACACAGAATTAAGCATAACA  
AAAG GAAT AAGAACAAAAAATG TAAA ACAGAGCAACC ACCCTATCC TCC TAAA AAATTACTGGGGGAGC  
ATACAAAAAACTAGC ACCCTAAA CACGCCATTC CTATGCCATAGCATGGCGTAAGTATAAGCGAAGCG  
AACAAAAC TTTAAA GTCACCAGCTTCGAAGAGCACTTATAGCAAGTTCCCTATGAACTA TAAA CCTCG TAA  
AATGCTGTATTTTC GACGAATCT TTTCTAAGTTATTC TTGAACTGT CAAAT CAAA TCCTTGTCTGACATT  
CTATCAATATACAAGACGCCATGAAGATGATCAG TTTTCATGCATTACAATTC TTGC TAAAAGCCTTCTA  
AAGC TAAAGAAA ACTGCTGCCATCTAAGTT TTTCTGCTGATACTGTAATCTTATC GGGTCTAGCTACCTC  
TCCTCTTAATCCTGGGATGGATAAA CACCC TTCA TTTTCATAAAA CCAACTGCTCAGATT CAAAAGT AATT  
ACAGGATTAATGAATACCC TAG GAAA ATCACAGAAA AC GAGT TCCCATCTTCTAATTCTC TTTCTACTC  
CCATAATGAACAAA GAAA TAC CAAA TCCTACCTGTGGAGCAGCTA ACCCTACTC CCTTA TAAA AAGCCAT  
TGCTC ACTCATATC GAGTAC GAGT TGCCGAGCTC ATCCGTGA TTTTCAGTTACAGGAGCCGCAAC TTTA  
CG TAAA ATCGGGCTATCGTAATACTC AAGATCTCTAATCATAATCC CACAGATCC CTATACAAAAGTCTCA  
AAAAGATAGGCCGTCCGA TAAA CCTATGATC TAAA AAATTC CCTAGCGTCTTCTGACATAAA TTACAGG  
TTATTC TTCCGTGAAGTCGTTCACTGACTAGTATCGTCAAAGTGAA GAAAAAG TTTTCATTC ATACAAACA  
CCGAGAA GAGTGCTAT GAAATCC AAGACACCTAGAGCAGACATTGTGATG GAAA AGAAGATA CAAAGAAA  
GAGAAGTCTTCC TTTTC GCTGAATAGC GAAAACCTTC TAAATATCT TTTAATAAGTG GAAAAT TTTCAAT

ACTC TTC TAAAAAAATGGTCTC GGGT CTGGTCTTCTCT GAAAAACCTAACTGCTCCAAAACCT GAAA GAC  
CTTATCT CAAA GATACAGATT TTTC AAA GAAT TGGCTAACAGCTTGGCTC CAAA ACCAAATGCCGCTC GA  
GTCAATG TAAAAA ACTC TTCTA TTTC AGAAT CAGCCAATGCAAACCTGCTCGTGA ACTC GCATATGGACAA  
CAGCC GAGT GCACACTTGGCTTG GGA TAAAAACA ATTC GGGCTAAC TTTAAA AGCATATTGCACATCGGC  
GAAA AAGCT TAAA AAGACCGTTAACGAGCCGTAGTCCTTATCTCCAGG CAAA GCGGTA ATCC GTCGAGCC  
ACCTCATCTTGGAT CATTACCGTAACCGT TTTC CAGCGATATGGGC ATTC TAGAAA AA ACTTGGTTAA TA  
AAGGGGTAGTGATATGGTAGGGAAG ATTC GCTACTATACGTCC TTTC CC TTTC CAACC TTTA TCC TCTAG  
GGAT GTCAGAGGGT A TTTA CAAGC ATCC GTAATCTCAAT ATCC ATTGGCAACTGGGACAGAG ACTC TTCA  
AACATA GGGT CTT TTTC CAGAGCAATTACATTGGCCCTTGAGAAA GTAGA ACTTCAGATAATGCTCC GA  
AA CCTGGACCA ATTC AAGA ACCC AATCACCTGGCTGCACTTCTGCTGTTGTAA GAAT TTTC TTAAGAT  
GTTGCCGTCTACCAAAAA ATTC TGAGACAAAGCCTTC CAAA CTCGCC ATTC ACTGATCTCAGAAA AGAA  
GTTAACTGTTCTATAGA ACTC CGTGCC ACCC TTCCCGCCTTT TTTA TAATAAAA GAAA ATAGCTGGGGAG  
CATCTTCTGCAAGAAG TTTAGTTATTGTAGCT GGAT CAA ATCC GTACCGAGCATGTA ACTTATT TTTA TA  
GTTAGCCTCTTCTCCGCCGAAA ACTC CATCATAAGCTGTTGCTTCAACTGAGCTTCCATCTTATCAAGG  
GGAT C TAAA GTT CAAA TAGCAGGAT TAAA CAATACAAAAAG TTTC AACCC AGACGCATGTTTCGAGAACCT  
TTC CACATCGCTCTTCAG GAAA ATTGATCTCTTC TAAA GATTGTCGGTGC GCAACGGACA ACTGAGC ATC  
CTCGCGGAA GAATTC TTCTGAGCACATCAACTGCCCCCTTGAGAAA GGACCAGCGCAGTCAATCGCTCT  
TTA TCC CAAGAAGAGCCTTCA TTTA GACGCTCTTGAAC TTTC CCTGCAAT CAAA TGTGC TAAAA ACTCCA  
AACCAGCCTTAATAGTCAAT ACCG GATACGTCCATTGTGTGATCTGGGCAGCCTCGTCAGCAAGCT CAAA  
ATAAT ACTC TCGCACC ATCC CCG GAGT TACT TTTA ACATCACACGTGAACGTACCATC ATCC CTTCTACG  
CGCTGAGCTACTAAG ATCC GATGCACAACGT TAAAA ACGTCTTCCG GAGT CATATCAAAAAACTTCGCGA  
AA GGAGACAAATCACGACCGAACATCGTTCTATCTCTTG ATTC ACTGAGGTAGGGT CTATAAAA AATCTT  
CTTAGCCTTAGCATCTGCAGCCATGA GAA ACTC GTTAATTACCG TTTC CAGAACCACAGGCCACATAGCA  
GAAT AATATTGAGATCTTG CAGATACA GAAT CTACCAACTGCGGGCAAGTC GAG TAAA AAA GAATATTCA  
ACTTGC GAAT CACATC TAAA GTCGTGACGACAGTGTCTTCGTCTACCT TAAA TAAC ACCC GATTATGGAT  
GGCT ACTC CAGAAGGAT CAAA CTC AAAGGAACCAGACGAGAAA GCTCCCTCATAGCCAAAAGCGATTCCA  
GAAA AAATCGTG ATCC CTAGATAGCAAGCTATAACAGCAGC TTTC ACT ACTCGCATCC TTGA CAAA TAGT  
TTTTA GGTAGAAA AACCTTAA GAAT CAAAGGT TGTTCCTCCTCCCTTT TTTCCAAA GAT CTTACCGCCTC  
CCTAGAGATGTGGCAAAC ACCCAAACAAAGCAGCTTAT ATTC TAAA AAAGAACCT ACCCTCGTCTTAGGT  
AAA AGCTATAGGGGAGGAGGG ACCC AGCCGTCAGAACACT TTTA ACAAAAAAGCGTTAT ATCC TCAAGCC  
AAAG GAAA CAAAAATGTATTT CAAA GGAATTT TTTC ACT TAAA TATC GAAA AGAG GGGTAACTAAGAGCA  
AAACACGCG TTTA GCT GAGTTGAGACA TAA ACTC ATAGA AATGCTC TAAAGAAG TAAA ACTC TACCACA  
ATCC TT ATCCAAGAGATA AAATT CAAA TTGGAAGCCCTCT CAAA AAG GAAT CAATCG TTTC TCTCCCTCT  
GGAAGATATGCACTTAGA ATCTCACGATC CAAA GCAGTCAACCAAACCAAGGAAGTATGGGGAA GAAAAA  
TCC TTTAAAACAATCTAATACCTGTGCTCT ATCC CTTTCA TTCC TAAAGAAATAAAA AATCTTCTGATG  
TTG CAAAGAAA AAT ACTC TTGAGCTGCAAGCAAAC TTCCAGAGAG GAAA ATTTA TGT CAAA CCCAC TTT  
CCTTGAACGCATTG TAAA ATGTCTCTGCGAACGTTAGATAATGTCTG TTTA CCT GAAA TGATATGCAATT  
TC AACAAGCCTTGGCAAAGCAAAGCATTGCTCGATATAGCGTCCCATCTACAAAACAAGC TTTCTTTAT  
CAACAAAGAAGAATCC CTTCC ATCC GTG GAAT TAAA ATCC CCGTGTATCGGCTCG GAAA GACACCAATACT  
TCCTTCGCCAGCTCTTCAGCTAGCACC AACCACTTAGCCCAG ATCC TATTTCAAATAGAGC TAAA GCTC  
CCATAATCATGGCAGCATA ATCC TCTA ATCC TGCAGAGTACA AAA GACTCTCCCTGTCTCCATCGACGCAA  
TAAA CGGCC ATTC TTATACAGATTGTTTCGCAA TAAA CTCTCCACATCTCTCTGCCACCACAAAACATTCCT  
GGTCTCCTAGAA GAATCCCTGTT TTTA TCAGAGAAA AG ATTC CCCAACCAT CAAAGAAAGT GAAA GACT  
GATCATC CAAA GAAGCTT GAGT TTTC CCTTCCCTATAGACACATAATT TTTC TCGTGAAGCTTCTAA TTT  
CTTCT GAAATTC TTCCAAGAACAATGATAACGCTTCAATCTCT TTTC TATTC ATGTAAGGA GAAA CG  
TGTAAGAT ATTC CGTCCGTTACAAATTC CTTCCCTAGACACATCATAGT ACTC GCAAACATCTCTGCTT  
GCTCTCCTAACAGAGAGC GAAT CTCTTCCCGGACCACGTGTACTGGCTATCAATATCGGTTCTCTGCCCA  
CTGTTGACCGT ATTC A GAAA GATAAAA AAGATCC TGA TTTAGGATCC GTTAGCTC TTTA AT TAAA TAATTA  
AGA ACCG TTTC GCTACAATGACGAACTCCGGATTTTC TCATATATACGCCGGCTTCAGTA TAAA CAAGCA  
TCATAAGAGCATTGTCAAAGCTCGCT TTTC AAAGCAGC GAAT CAACCAACGATCATCTATAGTGTAAAG  
GAAA AAACCTCCCGC TAAA TGATCAAAGATGCCCCCA CAAA CCACAGATTGTAGAGATCTATTCAC GAAA  
AAAATAGCCCGACTATCTTGAT ACTC TGCTCCT ACCG CAAAA GAAATAAA CTAAGCA ACCC AGGCAATG  
TCTTAG GAAATGACTTCACACCTCCA AATTGCGC ATCC ACGTCCGGA TAAA TAGCTTCTGTCC ACCC TCTT

TAAGCATTCTTCTTC TAAACACTC TTT TTTA CAAGAAC ACCC TTCTA GAAA AGCGGCTACTTCAAGA ACT  
C TTTTGCCTGTTGAACAAATACCTCTCT ATCC TCTCGATCTTCCACATGATATGTAGCT TTTT CAACA  
TCTGGACAAAGGACGAGGCTCTCAT TTTT CCTGCAAAGCTAGCAT ATCCCAAGC TAAAGAAA GGCAAGAG  
ATTGG GGGT GAG GAAA AC ATTC AGAGGCCATGTTGGA GAAT CTTGTACCTCTCC GGATACG GAAA GCATC  
TGAGATA ATTC GAAA TATAGA CAAA CCAGATGAGGCA ATTC TTCTTATCTACCTTAATACAAA CAAAT  
ACTTG TTTAAA ATCGCTGCAACTTCA GGGT TTTT ATAAT TTTT CTTAAGCATGACTTGGCACCAC TTA GA  
GTGAGT GC ACCC TATAGACAAAAAATCGG TTTA TCC TCTGCAGAAGCCT CAAA GAAT GCTTCTGCCGAC  
CAAGGGT ACCAGTCCACAG GAGT ATGAGCATAAAA GAAGAAGGTATGG GGAT TTTT GGTAATAAG TTTAC  
AAA T GAAA GGCTGGTCCGTCGTCATGA TAAAAA TAAA AAAAA CAAAAGGTATACT TTTAAT TTTAAA AT  
CAAAA CTATAC TTTT C TAAA TAT TTTA CTC GACAAA ACCTAA TAAA AAATGGTTA TAAA CA ACC AAAA  
TCC CT TTTT CCTTCAT TTTT TAATAAC TAAA TAGG GAATTC TTGATCT TAAA CTATAATAAGCGTTACCA  
TACGTCCT TTTA TTGCC GAGT CTC TTTA CGGAA GAGT GGCAGAGT GGTC GAAT GCATCTGATTC GAAA TC  
AGAAGTCCCTCAACGGGGACCGG GGGT TC GAATCC TTCTCTTCC GAAT TTTT CTA ACTATCTTATCTGT  
AACCT TTTACC TTTA TTAGGCGTGG TAAA TACGCTTT CAAAG TAAA ATGGAGGGG CAAA GAGGAAGAGAC  
TTCTTCTAATCCCTCTCTTCC TAAA GAATTTA CAAATTT TTTAG CAAA ATAGTAGAAA CATATGCCTGTA  
GTACA GAAA CCTTCAGT CAAAGAGTACGCTCCTG TTTT TCCTTCTACGACTTCTGATTCAAAAATACCAA  
ACCACCGATCTGGAGCCTCTTGTATCAAGATCTCCATGAT CAAA GCATGTTCTCTTCTAGCGGTCGGCAT  
TATTC TCGCAATAGCCTTGCTTGCTTCCCCTGGAAGTCTTGCCCTATGTCTTAGTAGCTGGTATATTAGCT  
CTTCATGCCGT TTTA GCCCTTGC TTTA GGAT TAT GGAT TTTT CTCATCAACCAAGCATGCACTACT GAGTG  
AAA ACTC CGGTACCGAGCTGATTACAACAAAGAAA CAACA TAAA ACCACTC AACCCAGAGATCT TTTA  
TGGCTACACCGATTGCTGTACCGCCTTCTT CAGGTCATCACAATCTTCTCC GGATG TTTT CCCAC ATTC  
ATCTTCCGCTTCTGC TAAA AATGCAATATAACAAC TAAA CAGGGAAGACCTTGGCCTGTCATAGTAAGC  
CAAATCGCTCT TTTA ATTATGAG GAA TTTT CTCTATTATTGTGCTT GGATTAG GAAT AGCG TTTT TGGCAT  
CGAATCC TATGTTAGGATGGAGCCTGCTTATTGCAGCGATT ACCC TAGTGATCTCTTCTCTATTATGTGC  
TATTGCAATCTCCGCTTACCAG ACTC TAACT ATCC GAAA ACTACAAAGCGAAGTCTCCTCACTAGAACGC  
CAGTCTGGCGTCATC TTTA TAGAAGAAGGTGTGCAAGACGCCCTTCTGTCC CAAA GAGTCC ATTC GCAG  
GAT TAGAAGATGACCTCGTATCTCCTATCTCTCCACC ACTC TCTCCTGAGGATCGCTCTTATAGATCATC  
TGGTGATGCAAGCCGAAGCTAGAAGCCTCGAAGAGCACTGCTAATGCAGCTTGCTCTTCT ACCC TTAGAG  
GGCCTTGGACAGAAGGGCTCTCTTCG GAAA ATCTTAT TTTT TGA TAAA TAATCTTCGTACAGATCGTCTCT  
TGA ACTACAAGAGCGATCTTACAAT TTTT ACCAATAAGAAAAGG TAAA ACTC CTAT TTTAAA AGCTCCGA  
CTAGATCAAGA GAG CAAAAA ACTC CAAT ACTC TTCAGAAAACAGGCAAGCCATAAA GCTCC TAAA CAGAG  
GCTA ACCC CTCCGCCAACGAACAAAATCATCGCGACA ACCC ACAT CAAA CTTC GGATCTTCCAACTTA  
CCATAACAACAA GAAA TGAGCGCTACTGCAGGTACAAA GAAA ATAGAT ATCC AGCAGTAGGTCACAAA  
ACACTGCT ATCC CACACATAGGACTACAAAAGACAGGGAAGAACA ACCCCTTAACAAATAGGCCACTAC  
TGTCGTAACAGCCATCTGTGGAGT CATAACAAGCCC TAAA CAAAAT ACCCCAGAGTCT GAAA TGAATA  
GGA ACTG GGG TAAA AGGAGACTTATACTGATCTTAGC TAAA CAAGCTAAGAACAAGG ACCC GGCAATAA  
CCTTCAAAAAGGAT TACTTATGAG GAG TTTT T GAGTATCT TTTA GTAATGCTCTTAGCAACCAT ATCC CT  
TCCACAA ATTC ACC GAAT CGATACTAAGGTATCC GGCC TTTAAA CCAACTACAGAC ATCC TTCAACTTCC  
TCTGAAGT CAAA CCTAGATAAGGAT AGCTACAGAAG GAAAAAAGCAGCCGCACCATAATA TAAA TATGGC  
GCGAAGC TTTT TG GAAA CGATCTCCATGGAGAT TTA CCCAGAAA AAC TTTT TCCAGTC TAAA T GAAA GGA  
TTT TTTA ATGCATGCAAAAAT TTTT CCAAC TTTT CTATTTT T GCTCTCTCTT CACAAGATCGC GAATAT  
ATTGCTCCTTTT C CAAGCCATTC TTTT CTGGCTT TTTT CTGCTCCCAAGATAATCGTCTTCT TTTAAA  
AGCCA ACTCTC TTTT CCGTAATTC TAAA TCT TTTT TCTCCAAAAA ACTTGCCCTCTTCTT CAAA CGCTGA  
AAAGACTCTGTACATTGCTG TAAA GCATTGAGAAGCTCT TTTA TCATGC ACTC ACTAATCATTGCGCTCT  
CTTCCACACGATCTCCTATCG CAAA CTCAGAGATAGGCTGTTCACTACTAGACAAA GAATCTT GAGTAGA  
AACGTCCTC TAAA AAATCCTCTGAATCTT TTTT CAGCAAGGATTTT TTTAATAATTCACAAAATTC CAAA  
GAAT CTGTTACTTCATCGAATAAAA GACTCATAT ACCC CAATTTCCAAA CATA TTTT TTTAGAACTCAA  
TAACACGCTGTTT TTTCTTTCTCTCTA ACTCCAGTTGACTGTTGGCTGATTC AACTGCT GAAA TGAATGT  
CATCC TTCCATTAGATCC CCTA TAAA GGCCCTCTCCGCTAC TTTT CAGTGTA ACTAGCAAGCATAAGCAA  
CCGATGGAACCAAA CAAGAATGCT TTTT CATAAAA TGAGT GAAA TCTCCCTATT GAATATAGACACAAA  
AACCC TTTA ATTACCTCTG TAAA AAGACGTAATAAAA GGGCACAGTTCATCTCAT TTTA GAAGACAGATAGG  
CT TTTT CTATCTGCCAAAATCAA ACTTATTA TTTA GTGATGATCC TCACTATATCACTGCCGGCATAACGC  
TGAGAAGCTCTG CAAA CAAAGTAGCCCTACAAGCTA GAATGTCTGCTA ACTC ATCTCTTCTCTGCAATC

TCGTATA GAAA GAGGTGGACGCACCGCATCAC ACTC AATCAT TTTC TGAGCTGCCATTAGAGC CAAA ATC  
CC TAAA GGATTC GTAGATAAGTTGAGCCAAGAACAAC TTTC TTCCAAGCTTCAATAGGACGACCTAGAG  
CAACATAATCTCGAGCTA ATTC TGGCCAAACGTTAGCTAGTACA GAAA TCACTC CAGATGCTCCAGATAA  
TCGCATATCTGGCCACAGATTGTCGTCACCACAAAAC ACTC TCAATCC TGA CT CAGCAAAAAGCTCACAA  
GCCTGAGCAG ACCC TCCA GAATCC TTA ACTC CTATGCACAAA GGAT GTGATACAAAAGA TTTC AC GACCT  
CT GGAT ACAAAGACACGCCGGTAC GAAT AGGAT TGTTA TAAA GAAT GATAGGC TTTC TACTTAC ACTC A  
A ACCC TATCAAACCAAGCTT CAAA TCCATTAAGCCCAGGTCTCGTA TAAA GAG GAGT TGGAACAAGGAAC  
CC ATCTATAGGCCATTGCTGTGCAAAATCA ATCC AAGACATAG TTTC CTGAACAGACGTTGCCGTC ACTC  
CTACAAATATCGGCAC ATTC AAGTTAAGCGTAGAAA CAAAC GAAA GAATAGAAA GCTTCTCTTCATACGT  
TAGAGACA ACCC CTCTCCTGTGCTACCAA TAAA ATAATGCCGTTACCGGCTGCTCTTGCGAACGAACG  
AC ACTC TC TAAA GCAGC GAAA CTATAGACAAATCAGCCT TAAA AGGTGTAATACAGGCCCCCAAGAC AC  
TC A TAAA ATACTC CTA TTTAAA TAGGCAATCGTGCAACA ACTC GGTTACAGCG ACCC CAAA ATCC TTATT  
AATAAT TAAA TTAATAACCGTATCCG CAAA ACTC CAACA TAAA ACTG GAGT TCTGTGTAGAGCCTCAAAG  
ACTC TAGACATA ACTC CATGAAGCTAGCTTCGCTCCACTAATGCAAC TAAA GAT TAAA GGCCCTCACAA  
TTACTGTACCAAAAGCTTCAAGAGCC CAAATTATAGCCTGAGGATACTC TTCCAATCTATAGT GAAA TA  
CACTCC TAAAC CAAA AGCCATGACA ACTC CTGGAACAA ATCC CAAGCTTCGTACACA ACCC AAAAC ATCC  
TCTAGTCTCACTAGAGGAGAAT TGTATTCTACAAACCAAGAGCTTG ATTC GACTTCAATGAGAGT GCCA  
AA ATCACAGG ACCC TCTGTACTC TCA TTTA ATGAAGCGCAAATCC AAGTCCCTTC CAAAGTTACAT TAAA  
TGTTGAAGTCACAAAAATAGGCACCTTCGCTCGAACACAAGGC TTTA ACATATCTTGGTGCAATACCTTA  
GCACCAGA ACTT GCTA ACTC CTGCATCTCTTCAAAGGT TAAA GAAT CTATGAGT TGTGTATC TTTC AAGA  
TT CAAA GGT CGGCTGTATGCACGCCACAAACATCTGTATAAA TACGCA ACTC TCTTGC TTTA CACAGTTC  
TCCTATCAGAGAGGCA GAAA AGTC ACTC CCCCCGACCAAGA ACTGTAGT TTTC CCTGAAGACGTTGCT  
CCAAGGAAGCCTTGCATAAGG TAAA TAGCATCTTCTTGTAATGCCA ACTCACCC CAAGCAG CAAA CATCA  
AAGC TAAA TCTGGAACCGCCGCAAAAATTGC GAGT CGGTGAGAAT TACTTGACGAGCTTCTAACC GCTT  
AAGCGTAACACATAGGTACAGCAGTAGCTACAAATCAAAGTCGAAGA TAAA TCC TCACCTATAGCCAAA  
ATCC TGGCTTGATCTTCA GAAA GAAGCTCTTCTACATCTTCAAATGTTCCAAGATCTCCAAAAGATAG  
CTAGA GAAA CCTCTATACCTA ATTC CAAA CTATTG ATTC ATGTC TTTC TC GAAT CT TTTC AGTCAATGC  
CGCTCTCTTCCC TTTA GGAAGCCGACAAA ACTC TTCTAACCAATCC GTAACACCAGCTACTGCGCTAACA  
ACAACAAAAGAAGGTC TTTC TTCTTGATAATCTCGAA ACTC GTC GAATAC CAAA GGCTGTGCCACAC  
TTGTTCCACC GAA TTTA CACACAAGAGGAGCTGTTT CAAATCTAAGCATAACGTCAGCCTCTCTTGATGAA  
CGAATCC TCCTCTATCTCG GAAA AG ATTC ATATTC GCTATCAAAGCTCCTGCAGCTCCTCGAACCAATT  
GTGCAATAAGATACACATCTTAATAGTTTCGCGTATTACCGCCGTA GAAA TGGGCCCTATATGTAATCGC  
ATATCATCATGAGCTAG ATCC TTTC GAACCTGAGGATGCCAAGGA GAATCA TAAA GAACATAGGTAGCCG  
AATCC TTCTCATAACAAGAAGTTATCTCTTC TAAA TCGACCTCTTGATCAAACATAACGTGTACAGAGAT  
GACATGCCCATGTGCAACAGGAACACGATGTACAGACGCAGTTATA GAAA ACTC TGCAG GAAA ACCTGGC  
TGTC TAAA ATT TTTA CAGTCTCTCG GAGT ATCTCTCTCTCTCCTAAGATATAAGGCACAGTGT TTTC  
CAAT TAAA TCTAAA GAG GAAA ACTC CAGGATATCC AGCCCCACTAGCTGATTG TAAA GTGATAACATGCAC  
ATGCTCGATAT TAAA CAACAGCAGTGGCTTAAGAGCCAGAGCAATGCCT GAAA CACAACAATTA GAAT TG  
GTAATAATCTTACC TAAA AAAGGCTGTTCTTCTAACAGAGACAAATGATCACTG TTTA TCTCAG GAAT TA  
AA ATAGGAACCGCT TTTA TGCATACGATAGGCGGTGGCATTAA GAAA AACTATC TTTC CCGAAGA TAAA CA  
AGTAG TTTC TGCT GAAA AAGCGACAGACGAAGGAAGACAAGATACAACAATA CAAA ATTC TATCTCTTCA  
ACGGAGC GAAT AGA TAAA TACGAACAG ACTC TGGCATCTCCATTAATGGCTCTTGCCATAAA CAAGCAG  
ATTC GTAACGCAACGCATGCTTCTCAGAAGAAGCTCCTA ATTC AGCAA TTTC CCACTG TTTA TGAT CAAA  
TAACAAAGCAATAAGCT CAAA TCCAACAAGGCCTGTAGCACC TAAA ATCGCAATGCGCATCGTC ATTC TT  
AGCT TTTA ACCAAACACCT TTTC TT GAAA CAA ACTC TCATACAAAACATCTGAGGTGTAAT ATCC TCAA  
GCAAGCCTTCTCCATAATCTTCTCCAAGATTAGCAAC ACTC CATCA GAAAAAACACGTCGAGAAA AGAC  
TTCGTGCC GAAT TACAAAACGCTCATCTTCCCCTACAAAAGATACTTCATGCTCGCCACAAAC ATTC CCT  
AAA CGAGAACCATGCA TTTC GATAAA AGGCTCTGGCTCTTCTCACAGCTCTCTGCCTTCGCAGAAC GGA  
TAGCTTCAGCCAAA GAAA TCGCTGTACCA GAAA TGGCATCTGC TTTA GCACGGTGATGTGTCTC TAAA AT  
ACGAACATCATAAGAAGTGC TAAA AAGT CAAA CAGCAAAGCTGCTAATCGCT CAAA TACATACGCCCC  
AA ACTC GTG CAAA CACAACAACAACAGGAACAT ATTC TGATAATGCTGATAAC CAAA TTT TTTA CACCGC  
TATCATTAG TAAA TCC TGTAGTTCCAATAATCACAGGCCTAGGTGTT TTTA AAAAAAGTC TAAA AGCAG  
CGACGTC ACTTCAGGAGACGA GAAA TCAATAA GAAT ATC ATTC TCTGTAACAACCTCTTCTAGCGAGTTC

TGAGATCTTCTT **GAAA** **ACCC** **TTTC** CCAAAAAACAGTGAGGACGACAAAG **TAAA** GCCT **GAGT** CAATAAGA  
C **ACCCATCC** TTCCAGTATCTCCGACAAGGCCTATGCTTTT **TTTC** ATAATACTATCAGCA **ACTC** TC **ATCCA**  
CCATTGTGGAACCTATA **GGATCC** TCTTAGCAAATGGC **TAAAAGAAA** CCACTGCAGCAGTATAGTATAAGT  
**GAGTAAA** TAGCTCCAACAG **GAAA** AGCAAAGCAA **ATTC** GCAAACCTGCTCTT **TTTC** CTAA **TTTATTTA** **GAG**  
**AAA** GAAC **TTTA** GATGTGCACCT **GAAT** ATT **CAAA** TTACG **ATTC** TACAAA **GAATCC** CCATCGACCTCAAAA  
**GACTC** TGCAACAAGATCAACTATGATGTCTTCTGCATCAAAATCACATGCAGAAGCTCCCTGAACGATCA  
CAC **CAAA** TCGGTTCT **GAAT** ATAGTCACGAAG **TTTA** ATCAGCTGTT CATA CAGCCACT **GAATAAA** TCGCTG  
AAGATACATGGTAATACTA **ATTC** **TAAA** **AGGACTC** CTCCTATAGC **TAAA** ATACCTCCAGATATAGGAGCT  
**AATCC** AG **GAAT** TAG **GAGT** **TAAA** GAGAGA **ACTC** CCAAACCAGCTAGAA **GGAT** TATGGTAGCAAC **TAAA** ATAG  
ATTG **GAAT** **TTTC** TTCCTTAGTTGCTCC **ATTC** ACAT **ACTC** AC **GAAT** AGCTTGCTCTG **CAAAAAA** AATCAC  
CGG **TTTC** CCAACTA **ACTT** CCAAG **TTTC** CTCTTGCTCCTTCTTG **GAAA** GCAAGCTTGACGGC **TTTC** **ACCC**  
CATCGTCTATT **ATCC** **TTTC** CCTTATCATGCGCGC **TTTC** CAAACGAGCTTCTCTTCTACGAGC **TAAA** CTAA  
TCTGTAATCTAGCT **TTTA** GTTGATGAGCGACATGAACC **ATTC** CA **GAAA** CAACCATTGGAACAGCTGACAA  
TAATACAGCTCTTCTTATA **GAAA** ATAGGAGCAACACTTGTACAGCAGGCAATCC **CCCAA** **ATCC** AGCCAAT  
**AAA** GTACAAGTA **ACCC** CTGCTAGCAATAATA **ATCC** TGA **TAAA** ATCA **GGATCC** GCTGTTG **TTTC** TTCGTTA  
**AAGACA** ATGCTGCATCTA **TTTC** TCCTTGAGGCAACGTTCAATAGAAGGAAGATTAG **ACTC** TCTA **GGATC**  
GACTACCACCTCTATATTGTTATCT **ACCC** GATAACTGAAGTCTGCTTGA **GAAA** TGTTT **TTTAG** **TTTA** GTA  
TCAACAAG **TAAA** TCTTGATCTTGTGAGCTCTAGCAAAGCTCTCCATTGCCCCTA **GAGTT** GTGTGCAGCA  
T **ATTC** GAGATCAC **TAAAGAAATCC** **TAAA** CTGAT **TAAA** GGAGGAGCCAACACTATAAGAGCTGTTGCGGC  
CCCTCCAGTTACAGCAA **GAGT** TCCAACAACAGC **TAAA** GCAATCC **TAAA** CACGCAAAACCAACTC **CTAAT**  
AGAACTA **ATCCATTC** GCTAGCTTCCGTATC **CAAA** CTCTTCTATGAGCATCTCTTCTG **GAGT** AAGAGCTT  
**CACCC** GATGCAGCTTTT **CAAA** ACTG **GAAA** AAGCGCACATAGAGATAGTGAGCGA **ACCC** TGCAAAAAGAGC  
TCTCTCCC **TTTA** ATTATAAGAAA **CATCC** CAAG **TTTC** CCGAGAGCGCTACCAT **ATCC** CCCAG **GAAT** ATAA  
GAAG **ATCCA** AG **TTTC** AGCACAAGACCAGCTCCCGTTA **ATCC** TGCACCAAGGAGAGCTGCGCTC **CAAA** CCC  
TCTGTCT **GAAT** GTC **ATTC** TCGGAGCAACTACGGTCTTA **ATTC** CATTAAATAAGACTTCTTAACGTG **GTAAC**  
**TC** CACCGACAGAAA **TTCT** **GAAA** AAGCAATCGC **TAAA** ACAATCGATTGCGGA **ACTC** CAGGAGCTAGTATC  
GTTAGGGCGATAGCCACAATTGCTAATGCA **ACCC** CTAATACAACAATACCTGCAATGAGCTCTGTG **GAAT**  
AT **TTTA** GCGT **TTTC** CCTGATTTAGAAA **CTG** **TTTC** ATTAGGGAGA **TAAA** TCGCTGATACAGAAA **CTC** CTGA  
**GT** TCTGAT **CAAA** TACAGGAGAAA **GGT** TACTAAGAGCA **TTTA** CATCAACAG **GGAT** CACTACTTCCAGGA **ACC**  
**CTAGAAA** CCATAAAA **AA** ACCATAAAA **ATC** **TTTC** AACAAGATTAATTATAACAACAAAA **TAAA** **ATCC** T **TTTC** CA  
TAACAAAAAATAGA **ACTT** **ATTC** CCTCGTATGATCT **TAAA** TATCATGCAAAAA **ACTC** TTCCGAAGACTA  
CATTAGCT **ATTC** ATT **TTTA** **ACCTT** **TTTAGAAA** ATAGACATATGGTCTCTTTCGAACCAAGCCCTCTT **ATTT**  
**TC** TCCCTCA **ATTC** CTTACGGAGAAA **TTG** CTGTCTCTCCGTCAAAATCAC **ATTC** TCTACGCGCG **ATCC** **TTC**  
**AAA** CCTCCTTAT **CC** AAAGGGACCTCTATCATA **GAAA** ACTGTCTTCTCTCCCG **ATTC** CCAAACATGCT  
TACAGCCTGTGAGAAA **AT** GGGAGCTCACGTTAGAA **GAAT** **AGGAGACTC** CTTACAT **ATCC** **AGGG** **GAATCCC**  
**GATCC** CCATCACTGTC **ACCC** **ACCC** TA **TTTC** CATATGGG **GAATTC** TGGTATCGCCCTTCG **ATTC** CTAACCG  
CCC **TTTC** TACT **TTTA** **TCC** CCC **ACCC** CCAC **CAAA** ATCACAGGATCC **CACAC** **ACTC** AAACGACGTCTATAGC  
GCCTCTTCTATCAAGCT **TAAA** ACAGCTTGGTGCAC **ATTC** GCCAAAAACATCTTCTTCT **ATTC** **CTT**  
**ACC** **ATCC** ATGGTCCATT **ATCC** CCTGGCCATGTTACTATCTCTGGACAAG **ATTC** CCAATACGCATCAGCAT  
TAGCAATCACTGCAGC **TTTAG** CTCCAT **ATCC** **CTTTC** TTT **TTTC** TATC **GAAA** ATCT **TAAA** GAACGTCCTTG  
G **CAAA** ATCTGACCTTAGATTGGCTAC **ACTC** **TTTAAA** CATCTC **TTTC** TTAAGAGACCAAG **ATTC** **TTTAACT**  
**TTTC** CCCGGAGGACAATCATTAGAAA **GTT** **TTTC** T **ATTC** TGTGCCTGGAGACTATAGTTCTGTGCTTTT **TT**  
**TAG** CTTC **CAAA** GTCT **ACTC** TCTTCTTCTT **TAAA** CCAACT **ATTC** TCCGTAATCTTCTTCTCAAG **ATTC**  
TCAAGGGGACAAGCTTCTCTTCTC **TTTAT** **TAAA** ACAACTTGGAGCCCAT **ATTC** TTATT **GAAA** AACATCAT  
ATC **GAAA** TGACCC **CTCTTC** **TTTC** TCCGGAGGT **GAAA** TTGATAT **GGATCC** **ATTC** ATAGATGCATT **ACCCA**  
**TCC** TTGCTGTCTCTGTCTGC **CAAA** CAAAAATCC **AT** CGCGCTTGATAATGCGTTGGGAGCAAAGGACAA  
AGAAA **GCAAT** CGCAT **TGAAG** CCAT **TGCC** CAT **GAAT** TGCAAAAAAT **GGGT** GGTTCTGTCC **ACCC** **TACTC** GT  
GACGGTCTATATATAGAGCCCTCGCGGTTACATGGTGCGGTTGTTG **ATTC** CTATAATGATCACCGTATTG  
CTATGGCTCTCGCTGTAGCTG **GAGT** TCATGCCTCGTCCGGACAA **ACCC** TCTCTGTAAACACACAGTGAT **T**  
**AAA** TAA **GAGT** **TTTC** CACA **TTTC** GTGATTGCAGCGCAGACACTACATGCCAACGTTCGACACTACCAAGCA  
GAT **TTTC** **CAAA** CGGTCTTCTTCTGTAGG **TAAA** ACCTCG **CAAA** GTCAACA **TTTA** TCGCAA **TTTC** TATCG  
CTGCCTTTT **CAAA** ATACAGATCACCTTC **TTTC** AGATCG **TTTC** CATGGAG **ATTC** TCC **TAAA** ACTATCTACC  
AACGCTATGGAGAAGAAGGTT **CAAA** CAGAGAA **GAATTC** CTTGCCCTAACTAGTGTACCTGTCA **ATTC** CTAG

CATCGTAGC TTTA GGAGGCTGT ACCC CTCTTATTGAACCATCTTACGCCATAT CAAA GGGAGAAA CAAT  
GCTCTCTTAGTCTT ACTC GAACTC CCCATCGCTACACTATGTCAACGCCTACAACATAGATCTATTC CTG  
AAA GACTTGCACATGCTCCATCATTAGAAGATGC CAAA TCTCAACGATTAGACAAACTACG ATCC CTCAC  
ATCAAATGCCTTCTC TTTA C GAGCAGAGACTTCTCTGAAGCTGTGATGAGAGATTGTCAAAGCT CAAAC  
AAA CGTTT CAAA AGCACAAAAGAGAGCTCCTATGCATAATCAATATGGCTCCAT ATTC TCTATCACTACT  
TGGGGAGAA TCC CATGGCCCTGCTATAGGCGTCTGAATTGAT GGGT GTCCTGCAGGTCTCTCCTTATCAC  
CAGAAGAT TTTT TCCCGCTATGGCTAGAAGGAGACCAGGGCAACTTCATACTTCTCCTCGTCAAGAACC  
GGACCTAGTCACTAT TTTA TCTG GAGT CTACCAAAACAAAACAACAGGA ACTC CAATCTCTCTTATT  
GAAA ACAAGGATGTATCC AGCTCTTCTTATGAACATCTACAACACTGTTACCGACCGGGGCACGCACAAC  
AAA CCTATGAAGG GAAA TACGGACAAA CAGACAACCGTGGAGGAGGACGCGCCTCTGCTAGAGAGACCGC  
GTCTC GAGT TGCTGCTGGTGTGATTGC TAAAAAGATCC TTTA TCTCAAGGAAT C GAAA CACTC GCATTC  
C TTTT TGGATTC GGCACCTTAGAGAG TAAAAATTATCC CAAAC TTTT C GACTC GCTAATACAACAGGTTT  
ATACCTCTCC TTTT TACAC ACTC CTCTCAAGAA GAAATTCAGAAT CTCCTTCTGCTTAATCC TGACGA  
CTCT CAAA GAGGTGTAGTCTCT TTTA TCACCTTCTCC TTTA CCTATAGGCCTAGGCGAACCTGTG CAAAGA  
AAGCTTCCAGCTCT TTTA GCTGCAGGCATGATGAGC ATCCCTGCGGC TAAAGGACAAAAA TAGGAGCCG  
G TTTT CTCTTCATCACAAATGACAGGCTCCGCCTATCTAGATGCA TTTA TTGCTGAT GAAAGTG GGGT GTC  
TCTTCAAAGTAATCGCTGTGGAGGAGC TTTA GGGG GGAT TAGTATTGGGCAGCCTCTTGAAGCCGTGTA  
GCCTTCAAACCTACTTTCATCTA TAAA AAAACCTTGCTCCTCCGT TTTA AAAAGATGGCACACCGATCGCAT  
ACCGC ACCCCTAATCAAGGACGCCACG ATCC TTGTGTAGCC ATTC GAGCTGTTGCCGTTGTTGAGGCTAT  
GCTTGA TTTA ACTC TAGTAGACCTGCTTCTCCAACATCGTTGT ACCA AATTATGATCGA ACTC GTTACCG  
ACTC TCCTCACCC TATTC ACCTAGTTG ATTC TTTA CAAA ACC TAAGCTG CAAA CTTCGTTGTCTACCGA  
CTTCCCTCTCATT TTTA TAACCAATACTAAGCTCAAC ACTC TTATCC TACCTCCTCTATTAGACTTGGCT  
CGCTCACTAGGAT TTTT CGTAGAAA CACTTACC ATTC CTGAAGGAGAA GAAA CCAAGACGGGCGATACTT  
TTT TATC CAAA CACCAACAACCTGACAGATCTCAATGTACCTAGACAAGCAAC TTTA ATTGGAGT AGGTGG  
AGGCGTAAT TTTA GATATAGCAGGC CAAA TAGCTGCCACACATTGTCGAGGGATGCC TTTT ATTGCT ATT  
CCCACCAC TTTA GTTGCTATGATTGATGCTAGCATTGGAGG GAAA AATGGCATTAACT TAAA TCATA TAA  
AAAATCGCATCGGCTCTT TTTA TCTCCC TAAA GCTGTAT GGAT CTGCCCTA GAAA ACTCTCT TTTT CTTC  
TCAGCAAGA ACTC CATCATGGAATAGCT GAAT GCATCAAACATGCTTATATCGCAGATTCTGCC ATCC TA  
CCTCTGCTTCAAG ATCC TAATGC TTTA AAAAGAAGACAAGCTGTCTCTTCTTATCAAAAAGA ACTGTC  
TCTGCAAAGCTTCTGTAGTACAACAAGATGTCAGAGACTATGCAAAAACGCCAAATAC TAAAC CAAA GGCA  
TACGCTAGGGCATGCTCTG GAAA TGCTA TTTA TAGG GAAA ATTC CCCATAGCTGTGCCATAAGCGTGGGA  
ATGGTCCTAGAAA CAAAGCTATCTCT ATCC TTGG GAGT TGCTCGCTCTCCAGCTATACTAC ATTC CAAA  
TACAAGACCT TTTA AGATATCAGCTCCCTG TTTT TC TAAA AGATC TTTATATGAGAGCGCAAATACCTCC  
ACATAATTGCGATCAA ATCC TCTCCGCTCTCACCTACGATAA GAAA AAACAAAAT ACTCCCTTACCACCA  
CAAA TCATGATAGAAGAGATCGGACTAGCAGCTTCT CAAA ATGGACGAT CAAA CCAA ACTATATC TAAA  
AC ATTC TTACAAAAGTCC TGAGGAA GAATTC TATGCTATGCACAACAATTAGTGGACCTTC TTTT CTGG  
AAGCTAAGAAGCAGATACTACGCTC TTTA AAA GAAT GTCATTGC CAAAAATGC GGGT AGATCTTC TTTT  
TGTATCTTG TTTA GAACTCAA GAAA CTCATGGA ACTAGCTCCTA TTTT CATTCTTGCATG GAAA AACCT  
GAAT CATGCTCACAAGCAGACT GGAT AGA TAAA ATGCAATCGCTAGCTGAGCTAAA TCC AAACTATCTAG  
ACTTG GAAA AAGAT TTTT CAGAAGGGATATGATACGC ATTC GACA ACTC ATCC TCAAATTAAGATCAT  
TC GTTCCCTTACATACTAGTGAGCATACCGACATTATAACA ACTC TATGCACATATGCGATCTTCAGCAGCT  
GACTACTA TAAA TCC GCTG TTTT CTCTTCCCTCAACGACAGATCTCCTAGATATCTGTCACCAAAAACGCT  
CTCTTCCCT GAAA ATACA ACTGTAG CAAA TCTAGGAG GAATGGGGCGCCCTTAC GAATACTC TCCCCGAT  
CTTACAAA ATCCA TTTA CCTACGCAAGAAGTACAGGATCTTCCCCGTAGCTCCAGGGCAAT TTTT CTCT  
AAACACCACTA TTTT TACAAT TTTT GCAAGCC TTTT TGCTCAATCC CCCATCTGCGCTCTTATAGGAGACA  
CTTACGAAGTATCGGGCA TTTA ACCATAATCC TTTT TTTT CCAACTCGGAGT AGCTTGGCCATATAT  
TAAA CTCCT TTTA ACCCTCAAGAGCTCC TAAA TTTT CTCTTACC ATTCGCACGCA ACCCTTT TTTA GGA  
GT CAGCGT GACTTCCCATT GAAA ACTGCTGTTCTACCG TTTT TTGA TAAA CAAGCTCCATCTGT GAAA G  
CTTCC GGATCC TGTAAACGCTAGTC ATTC GCCAAGGA GAAA TTGAAGGACATGATACCGATGGCGAAGG  
GT TGT TTTT TGTAATTGATGCAGCACC AAATTC TTTA AA TAACCAAC GAGT TGCTATTATAGGAGCAGGT  
GGAGCAGCTCAA TCC ATAGCA ACTC GATTGAGCAGAGCAA ACTGTGA ACTTCTTATT TTTA ACCGCAC TA  
AA GCGCATGCTGAGGAT CTAGCTTCTCGTTGCCAGGCAAAGC ATTC TCGCTGGAGGAACTC CCTCTACA  
CAGAGT CTCCCTTATCATCAATTGCC TTCTCTCTCTCTCTTTGTACC ATTC TAAA GCAGTTGCTCCC



TGTGTTGTCGATATTAATACAATTC TAAACATAGTGCCTTACTCAGTATGCTCGATCTCAGGGAAGCT  
CCATTA TTTATGGTCATGAGATGTTACGCAGCAAGCTCTCTTACAA TTTCTTTATGGTTCCCAACGCT  
CTC TTTCAAGCA CAAAGAAAAAACC TTTATTCGTAGAGCTGCTGTCTTAGCTTCTCTTT TTTCCATCGCA  
CCA TAAA CATT TTTCTATGCTGCTTCTTCGTC CAAA GAGGCTCTATGCGTC CAAAT TTTA TTC TTT  
TC TATTGCTATCTCC TTTAATCTCCGAAGCTTCGCAGCGCATTATTACTGT GAAA ACT ATTCATGAGATT  
GCTTCAAACATCTTGTATGATGATGCAAATTACTGGCTGATC CAAA ATATCGATGACGT CAAA CAAA AGG  
GAGCTGAAGCTCTCAGCC ATTCAGCTTGG CAAA AACGCTCCATACAAG GAAT GCGGGCATTAGGAAC ATC  
CGAGCAAGAAGCTTGGGAC ACTCTAT ATCC TGATTGGCTATCT ATTC AACGTCAAGGCTCTAT TAAA CAG  
ATA GAAA CTGCT ATTC CTCTATTAATTACCAAAGTTCA GAAT CAAAACAAAATCGTC CAAA CCT ATTCAG  
AGCGCAAAGTATGCGCGCAAGATGTGACATTAGAACAACCTTGCTAAGATTAACCTCTCT CAAA GAAA GC  
GAAT CTCCCTATAACCAGTCTCCCATCAAACATCTG TTTCA CAAAAGGCGTTCTT CAAA GATCT GAAA TT  
CA TAAA GGACCT GGAT TACAACA TTTCTAGACGCCCA ACCCTC TTTA CCAGAGAAA GTCATCTACATTG  
ACAATGA GAAA TACAATGTCTTACGTATTGGAGAAGTCTG TAAA CAAAAAACATCC CTTATCTAGGGAT  
TG TTTA TACTGCCTC TAAA TATC ATCC CCAA TTTA TCTTCCAGATATTGCCA GAAT ACAATACCTATAC  
CGCCAAAAGCTCATTAGCAACGAAGCCGCAGC ACTC TTATCTCGTCACAGGCTAGATAAGTAATTC CCTT  
CAAA AGAA GAAA T TAAA CTC TGGCAAAAAAATCTTT TTTCCACTACACGGGTG GAAA AGCTTTA TTAGAG  
GTTGTTGTGTCCTTCGGTTCGGT TTTA CTGACTGCTCTGCTCTCCC TTTCT TTTA CGACCACCATGCAGG  
CTGCACACCATCACTATCACCCTACACAGAT TAAA CTGCACAGACAAAACCATAAAA AAAGACCTCATCTC  
TCCCAAACCTACCGAACAAAGAGGCGTGCAAT ACTC CTCCCTTAGTAAG GAAT TAATCCCTCTATCAGAA  
CAAAGAGGCT TTTA TCCCCATCTATGAC TTTATTTT GGAACGCC CAAACTTACACGGAG TTTCTGTTA  
GAAA TCTCAAGCAAGCGC TAAA AAATTC TGCAGGAACCCAAATTGCACT GGAT TGGTCT ATTC TCCCTCA  
ATGGTTCA ATCC TCGGTCTCTCATGCCCTAAGC TTTCTATCC GAGAC CAAA GTTATAGCGCACACCAA  
ACTGTTACCGAAGCC ACTCCTCCTGCTGGCAAAACTGC TTTAATCCATCTGCGGCCGTTACTATCTATG  
ATTC CTATATGG GAAA GGGGT TTTCAAATATCC TAT ACCCTTGTTCCACTATTGGAGAGAGAAT GCTGC  
GACTGCTGGCGATGCTATGATGCTCGCAGGGAGT ATCAATGATT ATCCCTCTCGTCAGAACAT TTTCTCT  
CAG TTTA TTTCTCCCAAACCTTCCAAATGAAC GGGT GAGT CTGACAATTGGTCAGT ACTCACTCTATG  
CAATAGACGGAACATTATACAATAACGATCAACAACCTT GGATTC ATTAGTTACGCATTATCACAAA ATCC  
AACAGCAACTT ATTC CTCTGGAAGTCTTGAGCTTACCTACAAGTCGCTCCTACCGCAAGCACAAAGTCTT  
CAAATA GGATTTTCAAGACGCTTATAATATCTCC GGATCCCTCTATCAAATGGAGT AACCTTACAAAAATA  
GATACAAT TTTCA CGGT CAAA CTCTCCGGGCTCCCGCTGTTGCTTAGGAT CTGGCCAGT ACTC CGTGCT  
TC TTTA TGTGACTAGACAAGTTCCAGAACAGATGGAACAACAATG GGATGGTCAGTCAATGC GAGT CAA  
TACATATCTTC TAAA CTGTATGTG CAAA GAAGATACAGCGGTGTTACAGGACATGTGTTCCCGATTAAAC  
GCAGT ATTC ATGCGGTATGGTCTCTGCAAA TTTATTTA ACCGTA ACCCACAAGA TTTACAAA GAAT TGC  
TTGCGC ATTC AATAATGTACACCTCTCTGCTTCTCAAATGC TAAA A GAAA ATAC GAAA CTGTAATCGAA  
GGG CAAA CAACTATCGGTTGCGGCCCTATC TTTCTTTT CGCTCCAGACTTCCA ACTC TACCTCT ACCCAG  
CTCTTCGTCAAACAACAATCTGCCCGTG TTTA TAGCGTGCGAGCTAA TTTA GCTATCTAATCTGTAGA  
TTAGCACAAAACGCTTGC ATCC TTGTGGTTAACCA TTTA CCAACAAAAAAGGAGGCCCTATGCCTTACG  
GA ACTC GTT ATCC TACATTGGCT TTTCA CACAGGAGGCGTTGGC GAGT CCGATGATGGCATGCCGCCTCA  
ACC TTTCGAAA CATTC TGTTATGATTC AGCCTTATTACAAGCAAAAATC GAAA ACTTCAATATCGTCCCC  
TACACCTCTGT CAAA CC TAAAGAAT TATTC G GAAA TATCC TTCTGT GGAT CAATGTACAAAATTC TTCA  
AACATGGTGTGTATTAGAAGTCATCATGGCAGGAAGAGGTGCTACAGTCACAGATGGCACACAAGCAAT  
AGCTACAG GAGT AGGCA CAAAT TGGGG GAAA GA TAAA AATGGAGAGCTCATCGGGGGCTGGGCAGCAGAA  
TACGTAGAGT TTTCCAACT TAAA TCGATGAT GAAA TCGCAGAAT CTCACGC TAAA ATGTGGT TAAAAA  
AATCC CTT CAGCAT GAAT TAGATCTTCG ATCC GTAAGTAAGCATAGT GAGT TCCAATA TTTCCATAACTA  
CATCAACATCA GAAAGAAACAAA GTT CAAACTTAACAGCTCTCGG TTTCTTAAATTTTCGAAAATGCAGCG  
CCTGCTGTT ATCC AATAA GAAA AGGAGGCT TTTA TGTTAT TAAA GAAA CCGTCTCCTACTAGCAT TTTAG  
GAACCTTAGCTCTTACTG GAAT CGTGATCAGCTACATGATCGGAGGAGGTATT TTTA GTCTTCTCAAAA  
TATGGCGGCTCTGCAAGTGGGGGGCGGT CATGTTAGCGT GGAT GC TTTCCG GAAT CG GAAT ATTT TTT  
ATAGCAAACACC TTTAAA ACAC TTTCTATTATCC GCCCTGACT TAAA AGCTGGTATCTATACTTACAGTA  
GAGAA GGA CAAA GTCC TTATGTC GGA TTTA CAATAGCTTGGGGAT ATTGGC CAAA CCAAT TTTCCGGAA  
TGTCGGCTATGCCGTAATTACCAT GGAT GCCCTTAACTA TTTCTTCCACCATAC CAAA CTGGAG GAAAC  
ACA ATTC CGGCCATCTTATTA GGAT CACTATTGA CAAA GATATTC AATTACATTGCTTACGAGGTATCC  
GCCAGGCTAGC CAAA TTAACATTATTGGCGTAGTCTGCACGTTAATCC CAAA CTCTTA TTTA TTC TCAT

CACAGCTCGATTCTTTAAGTTTTGATCTTTAAA ACTGACTCAAA GGGGACTGCTCCGCAACATACTACTA  
GGATCTATCGGATCTCAACTAAA GAGCACGATGTTAGTCACTCAAA GGCCTTTATAGGAATCGAAGGAG  
CTGTAGTAAATTTCTGGCAGAGCTGCTAATCCCTCCTCTGTTGGAAA GCCACTATCTTAGGATTTTCAGG  
ATGCCTACTCATATATGTCCTGC TTTC ACTGCTTCCTCAAA GTTCCCTATTTTCAGTATCAACTAGCAAAA  
ATAGCCGATCCCTTCTACTGCTGGGTACTGAACATTC TGGTAGGGAAA TGGGGAGAAGTCTTATGAATA  
CAGGACTATTAATAGCCGTCTTAACCAGCTGGTTATCC TGGACAATCC TTGCTTCTGAAATTCCTTACGC  
TGCAGCTAAGAATGGAACATTC CAGAATGTCAAA CCATCGAGAATAGCAAACACGCCCTTCTTTTCC  
CTATTCATGACAAGTGGGTAAATGCAGATTACCATGCTACTAGTATA TTTC TCTTCTAATGCATGGAATA  
CAATGTTA GAAATCACTGGCGTTATGGTCTTCTGCTTATCTAACTAGTTCCCTTTTCCTTGTGAAATT  
TAGTCTAAGTAAGAAGTATCCCAAACAGGCCGCTATCAAAGCTCGCATGCGATGATCACC GGCTATTTG  
GGCTCACTGTACTCTCTATGGCTGATCTATGCTGGAGGAT TGCAACATCTATTTATGGTGCCTATCC TAC  
TTGC TTTAGGGATTCATTTTACGTAGATTCAGGAATCAGACATAAA CAAGAAAAAAC TTTC TTGAATCG  
TAAAGAAATCC TGAATGAGCATGGCTCTTGGCGCTCTACTCGCTATATTTTATTCCTCTGCTAAT  
AAAATCCACAAATAGAGAGAGCTTTTAAAGTGGCCGCTGTTTAAATTTTC TTATCTTTTCAAAGGAAC TGGT  
TCTTTTTC AAAGAGAATCAGTTCTTTCTATTCCTTTAAAATCCCTCTTCTTATCC TCAATAGTAAA GCCG  
AATCAAACCTTCAAAA AATCTTTTTTTTCAGCTTTTAAAGGTATT TTTATGCACATAGCGGTCAAA GGAGCG  
GGATACGCAGGATATCTGTGACTTGGCATCTTCTCC TTTATACACAAGGACGAAT TAGCGTTGATCTCC  
AAAACCCAACCCCTATTGGATCTGGAGCCTCAGGCCTATCTTCTGGCCTTCTTCATGGCTTTTACAGG GAA  
AAAAGCTATCAAGCCTCCGCTAGCAAATCTAGGGAT CACCACA ACCCATTC TCTCATTACCAAAGCGAGC  
CTTTCTATAGGGGAGCCCATCGTGACATCCAATGGGATCC TCCGTCCTGCAGCCTCTCAGGAACAGGCCA  
CTATTTTCATGCAAAGAGCACAGGAGT TCCCCGATGAAACGGAGTGGTGGGATAAA GCTCGGTGTGAAAT  
TACAGTTCCCTGGAATGGTCATTGCCGATGGACTCGGAGCC TTTACAT TAAACATGGGGTAAACCATTGAT  
AATGATAAATATATACGCGTTTATGGAATGCCGTGCTAGCCTTGAACACAATATTACGATGAGCTGA  
TCGATGACATTTTCAGCAATCGCTGAGT TTTATGATCACATTATTGTA ACTC CTGGAGCGAACGCAGATAT  
TCTCCCTGAGCTTAAACACCTTCCCTATCTAAAAGTAAAAGGTCAGCTCGTAGAAA TTGCTTGGCCAGCT  
GAGATCCCTATGCCACCATTCAGCATCAATGGCCC TAAATATATGGTTGCTGATACAACAAGAAA TACTT  
GTATATTGGGAGCAAC TTTCGAGCACAACCAACCAGATGCC ACTC CAGATGCTCAAGTTGCCATACAGGA  
AATCATGCCCTCCGATCC TAGCTCTTTTCCTGGGCTTAAAGACGCTCAAGTCTTAATTATTACGCTGGT  
ATGCGCTCATCGAGCCCC ACCCATTTACCCATGATCAGTCGCGTACAA GAAAAAATTGTGGTATTTTAGGAG  
GCAAA GGATCCAAAGGTCTTCTATACCATGGGCTTTTAGGAGATATGCTCGCCAGGCTCTATTACGGGA  
TTCCACGGCATATATAGCTAAGGAGTTTCTCTACACTC CAGAGGGAGCAGCCTAACTCTCCCCTCTCTTC  
TTAAA AAAGAGAGGAGCCTTTTTCCTTACAAAGATACGCTAGCTTTTTCCTGAAAGAATCTCATCAAGAG  
ATACAAA CATTTTC CACGGATAAA GGCATCC CAAGGAAGCCCTGGAATCACTTCATATTC TCCGTTGC  
TAGCATTCGACAAGG GAAACCAAAGAT TAAATCTTCCGGTAATCC ATAGGGAT TGTGGTCCGAACAC ACT  
CCGGAA GAAAACCATTCCTCTTCTCAAAGCTGATATATTGATCGAGCAGCCTCTGC TAAAGCTCGTGCTG  
CAGAAGCTGCCGAAGACTTCCCTCGTGCTTCAATTACTGCACTACCACG ACTC TGTACAGAAGGCACCAT  
AATATTC TCTAACCAATCACGATCCGCTATCGTCTCTGCGATAGGACGGTCATTAATCAGAGCTTGGCTA  
AAATCAGGCACTTG CAAAGCGGAGTGA TTTCCCAAACCACAACCTTGTGATACAGCCGATAAA GGTACTT  
CTGCTCTATGCGATAACATGCTATGCATACGATTC TGGTCCAATCGTAGCATCGCAT GAAAGTTC TTTC T  
CAATAATCTGGGAGCATGATTCATTGCTATCCAGCAATTGGTATTC ACAGGGGT TCCCAACAACAAAAATC  
CAAA CATCCCGCTTGGCTGTTGTGTTCAAAGCTTTTCCTTGGCTAGCAACAATCTCCCCATT TTTCTTTA  
GAAGATCTTCTCTCCATTCCTGGGCTCTAGGAAC TGAACCC TATAAGGAATGCCGCATCAATGCCATC  
AAAAGCATCATGCAATGATGTGCTTACCTGCACACGCTGTAATAGAGG GAAAGCACCATCATCTAGCTCC  
ATGCGCACACCAGA TAAAGCCC TTTC TGTTCCAGGAATATCGTAGATACGCAGATCGATGCCACAATCAA  
GGCAAAAACATCTCCATGAGCCAGAGAAAATAGAAA GCTATAGGCTA CAAACCTGTCTCTCTGTTAC  
TGCTACACTCACTG CAAAAGAAA CCATAAGCC ACCCTCTCTTTA CTTTTACAAAACGCACATACTCTCAA  
CACTACG CAAA CAACTAATAATCAAAGTCCCAACATACG CAAA GATGATAAAA GAATCAAGTACCTAGA  
TTCCTTAG TAAAAGCTCAAAGCAAAAAAAGCTCATCTATT TTTCAATAGATGAGCCGACTTTTACTGAT  
AAGAACCTTAGAAAAC TTTATAAAA AAATAGGCCCGTGTGATCC TACCATATACTTGTATCCCGACCGCATA  
ACTTGTGTGCTCTTT TTTAGCAGCCAAATAACCGTGGACATC TAAA AAACCAA TAAA CCGTGGCG GAATAA  
AGAACATACAGCCCC TAAA AAAACGAT TTTAAGAGAGAAGTGATAGACAGATTATAACATA TTTAAAATA  
AAACTCTGCAAACAAAAAAC CAAACCTGGCCGCTCCGTA GAAAGCAC TTTATGT TAAAACGT TAAAA  
AGTCTTAACACACCTCGAGCTTCGG GAAACTCTACAGGAGCATTC CCGACATGATGCCTATAAC CAAACG

TTGCCAATTCCTTTCCTAATGAAA CCCCTTCTTGGTCAAAA GAAT TGATTC CCCAGCAAA ACCCTT GAAA  
TGCAAA TTTATGCTCA TAAAAAGCCAA TAAA CTACCAGCAATACGAGGAGAAA GCTGTTGCGCTACCAAT  
ATCGAAGAAGGACTGTTCCC TTTAAA CCTCTT ATTCGGGTTCGCATTATCTCT ACCCTGAGC TAAA GCTA  
AAGATTGAGCAACAAGG CAAA CAAAGAGCT CAAA AGATGATGAGCTTCTGATAATACACAATCTAGCCC  
TCGTTGGTTATGCAAAA ATCCAATGA ACTCTACGGGAACAATATCTGTTCTTGATGAAGAC CAAAGAAA  
AAA GAAT GCTGACAG CAAATCCCCACATCGCCCCAAATAAT GGGT GAAGTCC TAAA ACTAATCTCCTTCC  
CTTCTCTC GAAA TACTT TTTTCATT GGATTC CATT CACACTGTTG TAAATGCGCTG TAAAAATA TTTCAA  
TCC TGTC GAATAAG GAAT CACTGCTGTTGTAGGATACCC TAACAGATTACGATTC CAACTC CAAGCATC  
GCAGATAGAAGAGGAAG ATTC TCTCTCATT CAAA GAGT CAGCGCATGAGCATCGATAGCAGCTGCTCCTT  
GCAAAA ACTCTA TAAA AGCTTCGTAACC GAAA GCAAAACCTAATACA ACTC CTCTACCATGGAT GTAGC  
T GAAA ATCTTCCGCCAATACT ATCC CAAAGATG GAAT ACTTCTAGATAACGACTC TTATCATCC ATAGGG  
CTGCCTTGAGAAGTTACCGCTACAAAATGCTCTGCAATAGA TAAA CC TTTAT CAAA ATAAGCCTGTCTGA  
ACAGTTCTTCA CAAA CTGCAGGCTC TAAA GTTGTCTGACTTAGAAA CCACAACAACCAGTG CAAA CTC  
CAAACTATCTCCCGTAATACTTCTGCAGCATT ATCCGGAT CAATATTGGAGACAAAAAG ATTC TCTTA  
TCAGATGGGCAAGAGCCTTG CATAGCAAATACATAGC TTTA GGGCCCAACTC CGAGCCCCCAATACCTA  
TCTGTACAAGCGTA GAAA TTTA GCACGAGCTATATACAGAAA CTC TGCAAGACGAAGAGCTTCTCCTT  
AGAGT GTCTTGCTATCGCAGCAGCTTCTTCATGAAGATCTTGATCTCGA ACCC AAGCGCGTGTGCGGTA  
TGCAATACAGGGCGAG ATTC GCTCT GAAA ACCTTCTATACGATTC ATGATGGCGCCTTGTGTCATAC ACT  
CCATCTG CAAA ATCAATTC CCTCTCTTCAGTAAGTCTTGG TAAA GCCTCTAAGCAGCGATCATCTACAG  
TTCCGTAGCATAACTATAGG TAAA TCC TTCTACAGA TAAAGAGT TTTCTGAAT ACCTCTTCAGATAAG  
CATCC TGATGCAGTCAAATCAATCGGAT GCAAAGCCATCTCTTGCAAAGCAACTAATG ACTC ACAATCTA  
AAAAACC TTTACCC ATCATGATTC TCCT CAAA AG GAAA TGTGATACGAGAGACCTTC TTTCT TTTACTT  
GTACTATCT TTTCTGTGATC TTTCTGCGATTC CATT CAAA TAGAACAATCGATCT TTTCTATCTATTACTCTAC  
AATGT ACTCCGAAT ATCT TTTCTG TAAA TTGTTCTGGTAGAAA GGCCTTAAC TATTAG TAAA TCGT TTTCA  
TAATAATGTGAGATGACTAAGCCGGCATCACACA ATTC TGTAAA CAATCCGT ATTC CTTGTAAGGAAGAT  
G TAAA GTCGCTTGAGGATACTC CTCTTGTACCATGTCTCCATGGAGCGTAATA ACTCT CGAATACCTTC  
TCCTGT TTTAGCAGAGACACATACG GGGT TAGGTGACATCAGCCGCAATCGAGAAGCAGTT ACTC CATCA  
GCAACCTT ATCCAT TTTATTC AATACTGTAATTACTTGAGGCT GAGT GATTC CTA ACTCCTGCAAAAATAG  
CC CAAA TAGTCTCAACATGTTCCAATGCAAGT GGAT GAGAAGCATCTACTACATGTAATAAAAATATCCTC  
TTGTAATGCAGCTTCTAGAGTACT TTTAAA TGCCGCAACC AAAAGTATGCGGAAG CAAA GAATAAA GCCT  
ACTGTGTCGGTCAATAAC ACTC GCTGACCACAAGGCAAAAACACAGCGTC GAGT TTTAGGATCTAATGTCTG  
CAAACAGCTT ATTC TCTGCATAGGTATCTGCTGATGTCAGTAAG TTTAACAGAGTACTT TTTCT GAACA  
AA TATAACCAATCAATGCAAAGGTAG GAATCTGATTACGTTTT TTTCTG TTTACGACGCTCTCCCGTTGA  
CGTCTACATTT TTTA GATCTCTAGATAG TTTA TGT ATCCGCTCCC GAACAATTC TTCGGTCTAATTC AA  
TCTGCTTCTCTCCCTCTCCCTTGACAAAACCTCCACCCTACCTCTGAT TTTCTGTCTAGAAA GATGCCC  
CCACATACG CAAA AGT CGTGGTAA TAAA TAACGCGCTTGCGCGAGCTCTACCTGTA ATCC AGCTTCAGCA  
GTGAGAGCTCG ACTC GCAAAA TTTCTAAA ATTA ATTC TGTACGATCTAATAACAACACGTAATCGTT  
TTTC TAAGTTCC CAAA CTGGGAGGGAGATATCTCTTCATCAATTAGCAAAGTCCCAATAGTAG GAAA TTC  
TTC TAAA ATTC TTTCTGAT TTTCTCTTAA TTTCTCCTTCA TTTAAAATAAA ATGAAGAAGAAGGAGCTCT TAAA  
AGCCATGTACAAGTCTCAAGCACACTAAGATCACAG GAATTC GCAAGA GAAA TGAGTCTCTCAACATACT  
CAGAAA CACGATCC TGCTCTGCACGA CAAATATAACAACAACAGC TAAAGCTTGCGCAGGAT CTTGTTCT  
CTCTCTAGGAAGCAAAAACCTCCAACCTATTGCAC CAAA CCGCTC TTTCTTCCCATCTCGATTATCT TTTCT  
TTCA TTTCT TTTCTTCCTTATGTCCA TAAA AGCTCCATGCCATCGTATGCAC ACTC TCGTGTAACATCCT  
TTTC CAAAAC CAAA TGAAGATAGT GACTCACATGTGTAATCACTAGACGAGAAGCTCCCACCT TTTCTCAT  
TAGAAG ATCCGCTTGTCTAAGGT TAAA TGCGAAGGCGTCCGTG ATCC AAAAGC TTTA GGC AAAACTCCT  
AGGGAAGCTGACACAATGATCGTGTTC ACTC CTTGTAGATAATCTACAATCTGCTCATCGTAATGAGACA  
TATCC GT TAAA TAAGC TAAATCC CAAAACGATAGCCGTTACCTGACAATTC TCAAAAAATAG GAAA C  
GTATG TAAACG GAAT ACCTAAGAACTC TTGTTCTCCGCA TTTCTCA TTTAAA ATAGTATAGCGCAAAGAA  
GCCGC TAAA CTGTTATTAG GAGTCTC TTTCTGAACAAGATGCTCCTTAGT TTTA CATAGATAGTCATATG  
TAAA TGAT GAAA GAAT AATCGGAACTG ATTC TAGATGCGTGATATACCAAGAACGGAGATCATCG ATCC  
TCCAATATGATCATAATGA GGATGAGT AAGAAA TACACC ATCC AAAACGAGGAACACGGTATCGCAATAGC  
TGTGTTCTAAGATCTGGACCTGTATCAATGA TAAA GTTT TTTCTCCTG ACTCTG AACC ACACGGAGGAAC  
GCAGACGACAT ATTC TGCCTTGCGAACATACCTCACAAGAACAGAAGGGCACAG GGATTCCTTCC GGATC

TCCTGTGCC TAAA AAAACAATCTTCCCCGAACAAGATG TTTC TTCCATAATAAGGCCTCTTAATCGT TTT  
CTAAA ATTAGTTGTTCAA ACCC CACTTCTGTTCCA ACTCTGCTAGC ACTCCTTCT TTTC GGAT CTCTTGC  
ACAGCTGCCTCGA TTTC CAAGGC TAAA GCTGGTCGATCTGAAGCAACGCCAATCC CGT ATCC TAAA ACCC  
ACTGATCTTCAGGAAGATCTATGGTTGCTGTA GAAA GAGCCGGG GAAT TTTC AAGACA ACTTGAGCGAT  
AGATGGCTC TAAA ACAGCGACGGGAGA TTTC CCATGCATGACTTCCAT GAGT ACTTCTA GAGT GCTATCA  
AAAGAGC GAAT ATGAACTTCA GAAA GAGACTG TAAA TAGGCCTCTTGATAGGTTCCCTG CAAA AACAGCTA  
CAGAACGATATT GAGTGAGTGGCAAT GGATGCTTATTC TCTCC TT TAAA CAC TAAA ACCAAGTGT TTTAT  
TTTC CTCCCATAGTAGG GAAT CATAA GAA TTTC CTCAATCTAGAAG GAGT AATGGAC ATCC CTGTTATG  
ACCGCATCA ATCC GATGCTGT TTTC GG TTTC GAATGAGTGCATCAAAG GAAA ACTC CCGAACGTCAAGCG  
T TTTC CCCAGCTTGTACTAATCTCTCTAGCCAAGTCTATATCGAAGCCTACAACCTCTCCTCGCTTATC  
AACAACTC AAAAGGA GGGTAGGTTGCATTAGTCCCTACAA TAAA TT TTTC ACTATTG GAGT CTCCCCCT  
TCT TT TAAA CAACCC GTCAAACAAAAC TACAGACA ACTGC TAAA AAAGCT ATCC ATGTTTTT TTTC TT T  
TTA TGCACATACTCACTC CGACTC AATGGTCTAACGACAGGGACTAT ACCC AGCATG ATTC TAAA AAAA  
ATAA GAAT CTATACAAAAC TGTCTG TTTC TAAGGAGCCAATCTCTTGA ACCC AAAGCCCTAAC TCTT  
CGAGTTCACAAGGAA GAAT ATGTTGTG ATCC ATCACA TAAA GCTAGTTCAGGATGCTCATGGACTTCAAT  
CATCAGTCCATCTGCTCC TAAA GCTATTGCGACGAGCTAATGGTAACAC TAAA TCTCGTCTTCCCTGAT  
GCGTGAGAA GGATCC ACGATCACAGG TAAA GAAG TTTC CTTCTTAATCCATGCGACAGT ATTC AGATCCA  
ATGTATATC GAGT AGTTG TTTC AAAAGTAC GAATCC CTCTCTCACAA GAATAA ACTC CAGGACA ACTAGC  
ATGCTGTAACAAAT ATTC TGCAGCAGACA ACC ATTC T GAAA TTGTAGCTGAAGGA TTTC TT TTTAAA ATA  
ACCGGACGATGAC CAAA TCCTACTTCTATCTAGCAAGACAAAAT CAAA CATATTGCGAGCCCT ACTCGTA  
AA AGATCTACATGCTCTGCTGTAA TTTC CACATCACGAACATC TAAA ACTTCTGTCTCCGTCAATAATCC  
ATGAACAGCT CAAA CTCGGCTATGCCACACTACGTGATCGGGAGGCCAACCTT GAAA GAAT GCGGGTTC  
GTTCTTGCTTAC GAATAG ACCC TC GAAA AATATGCGCTCCAGCACT TTTA ACCTGTAGCCC TAAA GTAA  
TTGCATGTTCTTGGC TTTC CAAGGTACATGGACCAGCAATAATGATAG GAGT CCTCCACCTATAGACAC  
GG TTTC GGATAAAA GAATAACGGG ACTC CTATTGGAAT TAAA TACATGAGGTAGCGGG ACCC GTTTT TTT  
CCCATTAGACAAA TTTC CTTG TTTC TTCTCTTA ACTCATGAACAGCAAATCATAACACAGGGAAGAGA  
AA AGAAA TAGAAA GATT TTTC AAT GAAA AAAACGCCCTCTCTCTTGAAGAGAAGAGAACG TTTA ATGAT  
GCT ATTC TGATCC GTTAGACA ACTG TTTC AATATCA GAAA TTACATCTATCAGCGTCTGTAAGAAA AGCTTG  
AAA TAGCGCCTCATCAGCAT ATTC ATCTCTTCC CAAA AGTAG TTTC CTACAATAACAAAGCAA ACTACAA  
GTTAAA CACATAACGCCTTGTAT TAAA GAATAATCTACATT CAAA TTTTAGCATAT TTTCTCACAAAACAC  
AATAG TTTC TATTA TAAA ACTAAA ACAAATAGATCT TAAAAAAT TAAA AT TAAA TTC AAT GAAA ACAATT  
TAA TTTAAA ACCAT TAAA TTC ATTTGAAGACAAA GAAA AACT CAAA T TAAA ATTT TTTC GCTATACCGCAA  
AATGATTGCGAGGCTCT TAAA AGCAATGTTG GGAT CTATCC CTGTT ATCC CGGATACAACAAT ATTC CC  
GCATACAGTAACAGTTACTTCTACTGTACACTGTGTGATGGCGTTGTATCACCTACCAACGTGGATATTG  
CTATTGTTGTACCTAACAA ACCC ACAGCTC ACTC GAATCC AA ACTGTCTGT TTTA CGCTG TAAA AACCA  
TCC TGT TAAAGGTCTGC ACTCTGGTGGTCCAATTACTTC TTTA AGAGGTCTGATCC CCTTTT TATCC CTT  
CTGTTAGAAGAAA CTC ACCA GAAA ATGCTGAACCTCTGCGCTCGTGTTCATTGCC TAGACGTACTGACTG  
TATGCAGCAC CAAA ATAGCATCTCTCCTTGCTATTACTGGAGCT ATCC TACAGTTCATAGTCGCAGCGCC  
AATCC CCACCT TTA TTC CTTGATCC TA CAAA GCGTGGCAATAGCCTTCTA TTTA GGAGCTTTTC TTGTGC  
ACTCGGATCTCTCAAAAAGATACTC TGCCTGGCAAGCTC TTTCTAAA AACATCATCC GTTCTTCCACA  
ACGTCCTGTTCAGGCTGGGACGGAACGTTACACGCTACTTACG GAATTC CCTCCA ACTTGTAT GAAA  
CC ATTC CATTGATCTGT ATTC CATACGCCCAAGTTCATGGTGTGCTCCAAGGGT AGTTGT GAAA AAAACT  
GCGTG TAAA TTTC TGC GCGCATACAAAAATCTT GAAA AACCAGCGCGGCCACTAGCTATTGATCC CTA  
CAAAA AT AAGGC GAAT ACAGCTCCTGCAGCTGCCGATTG TAAA GAGGCCGCTTCTGCAGACAACGCTCT  
CT TAAA AAACATGTAGCG ATTC TAT TTTC TGAAT AAGCAATTGCTTCCAAGATAGTCAACTTGTCTTGCC  
AGCGACTATGT GGATA TAAA ACTGATCACTGCATGCA ACCC AGCTTCTCCTCCTTCGCGTTGCAAAAAA GA  
AA GAGC TTTC TCTAAGGCAAACGCAAAA ACTC TCTCTTGTAAATGGTTCAACAAAATCC TCGCT ATCC CCT  
TCTTCCAAAAGACTT CAGAACA GAAA CTCC ATCC CACCTGTGCCCTGC TAAA TACTGAGCGACAACCA  
TT CAAA CAAA CTGTACTGAGCTGCAACTAA TAAA C GAATGATCTTCTTCGCCAAATCCCT TTTC ATGAT  
TTTC TACCTGCAGAGGAGATGAAGCTACAAAATCTTCTGATCTTCACA TAAA AACTGTTCAATAGCTCGA  
CAGGGCTCT ATTC TATGCA TAAA AGAAGCAACAACATCTCCAGCTTCTTCTACCTTCTCTCGACTTACCA  
AAAGCGC GAAA GCAAG ATTC ACTC GAGAACGC ATTC CTTGTACT CAAA TAAA AAACGTCCAGC TAAA TG  
AACTC CAT GAATCC CTAATGAGCAGACCGTTCTGAGGCAGCTTCACAAAGGAT GCTGGAAGTAGCTGAT

AAA CTTCTGTAAGCTTATCTTCTCC GAAAGGAT CTCCCTC TAAA TAGAGAAT GGCTGCAGCTTGCATCT  
GAACACGAGCA GAAA GT GAATTACAAGCTAACT CAAA AACCGATTC CATTATAGAAGATGACCG GAATAC  
TCTACCTCCTCTCA GAATGATCTG TAAA GTAGCTACCTGCACTTCT GGATGATCTGCAGCCAATAATGTA  
CGAAT CTGTTCTTCCGTACACT TTTC AGGATATTC TTAAACATCTCACAGGTCAT TAAAGCTTGATCTA  
TGCCAGTTAATACACCCTATGAGGCC GAGTAAGAACACA TAAA GATCTCCAAGCTTCTCTTC TTTC CGT  
TCCATCTAATTGTGTAT CAAA GACTACA ACTCG TAAA TGAGGCACAAGATCTTGTATCTCCAACACGGCT  
GCAGCACGATAAGCAGTGATGCGTACTT GAATAGAA GAATCATT TTTC GC TAAA TCGCCCACGGCGCGCA  
GTAAGCAACTAGAACCATAACAGCTACTTGTACAGCAATCTCACGTACGGTATCGCTATCATCAGA  
CAAAGCCTGCAAAA CAATAGGCACTAACCGATAGTCTCTCGCC ATCC CTACAGC TAAA ATAGTAATT ACT  
CGAACGGTAAGTGAA GAATGTCTAATATTTT CAAA TAGAAGAGAAGCTGCAAGATCC TCATGAATATCAC  
GATCTGCTTCCAATGAAG GAAA GCGTTCCTTGAGAACGGAGGAAGCCTCTCTCCAAGCA GAATATTC ATG  
ATG CAAA GCTAAGGCTCG TAAA GCCAAGCGAGCTTCTAGTAAGGAACAATCGGAAGATAATGAGGTCTTA  
GCCTCTTGCGCTGCGGTACGAT ACTC ACAAAAACGC ATTCGTTGTT GGATGGAAT TAGATCCATCC ACAC  
AACACATAACGAGCAGATATACTATGCTATGGAGCCTAATAAGCCTCCACCAAGAAGAT GAATGTGTAGG  
TGGAAAT ACGCTCTGCCCCCTTCTAAGCCATTGTTGACAACAACGCGAT ACCCAT TTTC TATCC GAAT  
TTC GAGCCATCAACT GAATAATCTTCCAGCTTCTGCAAGCAAGA GAAA ATCGTCGCCTTGTATATCC TG  
TAACTTCTCAATATGCTTCTTGG GAAT AATGAGCAAATGTACTGGAGCTTGAGGGAAC TTATC TTAAATC  
ACGAT TAAA GT TTTC ATCC TCAAAAACCTTATCGC ATTC CACAGCTCCTTCTATAATGCGTTCAAAAATGG  
TAGTCATACTAATCTCTGCTGT TTTA ACAC TAAA TTCAGTGCTTCTTCAAACTC TCTTGACT ATCC CAT  
ACA GAAAGAAA TAGTCC CAAA TGACAAAAATAGCACCAGGAATTC CCGTAGCTTGAACCAACTGATCTC  
CAAGCA ATCC TGCC ACTCCTCAGG GAAA GGAATCC GGACTTCC ATCCGGCGATCC AAAGTAGGTG GAAT  
GCCTCGCAAAATCC ATTGATCC GAGCAAGG GAAA CTGACAAAAGCTGCC GGATGAC TTTC TCC TCCAAA  
GAGAAA AAATTC TCC TGCCATGCTAACGGACGATCAAATCGCAAACAAACACT TTTC CTTTTC CATGACTT  
GTTTC ACAATATCACGACACACAGATCATAACAGAACTTCTCTCGCAAAC GAGTTAG TAAA TCGATTGC  
AAACCG TAAAGCAAA GAAA AATTC CAAATCTGTAT TTTC CTCTTCTTCCAAAGGAT TGTAGAT CAAA ATA  
ATATCAGA GAAA GAACAGAAGCCTTC TTTAGAAA GAAACGTCCTTATCTTGCTCATCTACACCATGTA  
CTAACGTGTTATTC AGAT ACTC GTACTCATCGTGA GAAAGAAA TCC CAGACCATGCAAATAATCC AGAAC  
CATCC CTGCGCT ACTC CAAGATCC TGTGTAAGAAA CTTGGTGGTGATC GAAA CGCTTATGCTCTGTAGAG  
TAGCGCCTCCTACATCACAGACGT ACTC ACATTGCGCCAACT CAAAG GGATCTCTGGTACGAACGAT CA  
AA TTCTCATCAACAAGATCAAACATGATCAATAAA GCGCAAGCCGTCACTTCATCTGCGT GAAA AGAACC  
ATCATGTGTGCCAACACTTCTTG GAA CAAACATTC TCATTATCC TCCGTGATCC CCTCGACAATAGAACA  
ACAAACAAACCTCGGCCGGTAGTACCAT ATCC AAAAGCT GAAA ATCC TCCATCC TACTTGCAG TTTAGGA  
TTAATATCAAGCGTCCGCTGAAGGTAT TTTC CTGTTGCAAGCCCTAGATCTTC TTTC CCTACATCATAT  
TTAAA AA TAAATCC TTTC CAAAGCTCGCATTAAAGCAGCATATAGCGTTC TTAAA CTCTTT TTAAA AA  
TT TTTC CTATAAGCTGGTCTTACACACGAGGATTC CAATGACGCTC TTTC ATTC TCATCATGATGCCG  
TCTCTCAGACGGCTACCTATGTTCTTCCCTT CAGTTAGTTGGTACTGGCGTATACGAAGGA GAAA TCGA  
GATTC AAAATATCC CCTCTTAT TTTC CTT GGATTC CAATT ACCC TCTCATTGCATACACCTTAA TTAAA G  
AGCTCTCTAGCTCAATTAG GAATAGATGCCTCCCTTCTTCACTGC GAAT TGAGCAAAAATCAACATCGAG  
CACATATACATGCTCAA TTTC CCGGTCATGGCCCCATTGCT GAAT CTATGCTAGCCCTTCTCCAACCAGG  
AGATCGTGTAGCAAAACTA CAAA CTGCAGACGATCGCAGACTGGTCCGATCTCCAGATTACCTC GAAA GC  
ATGCT GAAA AATACAGA TAAA GCTGGCC ATCC CAAA CTCTGT CAAA GAAAAAATTAGAACACTTGATTT  
CT CAAA ATGTGGTAGATGATCGCCTTGTGCTCTCCCTTCC TACC TGCCGG GAGTTGTTCTGTTATGATTC  
GGATA TTTC TGGACTC CTTCTCTTATT CAAAAATCACTTAGTAATCC CAAACTCAGC ATTC GTCACTTT  
TTA GCTCTGTACCAACAGATTGTGGAAGGGCAACATGTCCTTGGC GAAACCATATTC TTCTGATCAAAA  
CAGAACCGCTGCAC ATCC GCACTGTA CAAACTCGCGTGG TAAA TCAACTCCTCCCTCAAGGTCTCTCCCA  
CACTCTGCCAATAT CAAAGAACCAACC ACTCGAGAATCCGGGATATC CAAAAATTT CAAAGGAACCTT  
TCTGCACAGATAGAA GAATTC TTTC GAATTTTC ACTATCGAACCTATAAAA GAAC ATTC TTACTTCT  
GTAATCG GGATTTA TTACAACCACTTACAATCA GAAA GC GAAA TCAAAAAAATATTC GAAA CAGCGCC  
CAAAGAACCTGTCAAAGCTGCCACCTA TTTC TCAAAGGCAGT GAAA TCTCTTCCCTGCACACAGACTCT  
TGGCTCACAGGATCC GCAGCTGCCATCAATATAGTGAGCAAGCAGA TAAA AAC GAGTACACTC ATGCTC  
AACCTTGCT ATCC TTTC TTAGAAGCAATG GAAA TGGGCCTGATCAATAGCGAAGGAGCCTTACTCACTCG  
TTA TTTC CTTTCAGCTAGCT TAAA AG GAATGTTGA TTTC CTACCATGTGCGCCACTATCTCAAAACAATC  
TACT TTTC AAGTTCCCTCTTATACACATG GAAA CTA TTTC TCTCATAATGACAGAGG CAAA CTATTAGATC

TGCAGCAAGCAGATATTGATGT **T TTC** TGGGCAGATGAA **G AAA** GCGGCCGCGTGTGCAATATACAAAACG  
ACGCGATAA **G AAT** AGCGGTATGTTCTGTGATCAAAAATCGTGTGAA **G AG** **T TTC** GATCAGCTTAT **T TTA** TT  
GCTA **T TTA** TGGCTCTCGTCTCCTTGA **G AATAA** **T TTC** TCTGCTCAGCTCCAT **A CCC** TCCTAGCGGGCTTAC  
AGCAAGCAGCACAT **A CTC** TTGGC **A TTC** CTGGATTC **T CAAAGCCT** **A CCC** CACTTGCAGTCATCACC GGAGG  
CGGCAC TG **G AGT** TATGGCCACAG **G AAA** TCGTGTAGC **T AAA** GAAGTAG **G AATCC** TATCTTGTGGAACCGTT  
CTTGA **T TTA** GAAGCTTCTCCAGCACAAATTGACCAACCTACCAAT **G AATTC** TTAGATGC **T AAA** ATGACAT  
ACCGCTACCTCAACTTATA **G AAA** GGCAAGAACACT **T TTA** TGCAGACCTTCC **A TCC** TTGTAGTTGGCGG  
TGTAGGAACCGA **T TTC** **G AACTC** TACCTAGAACTTGTCTATCTCAAACAGGAGC **T AAA** CCACCG **A CTC** CC  
AT **T TTC** CTAATTGGACCTATT **G AAT** ACTG **G AAA** GAAA AAGTGGCCACGCCTACGAGATCAACCTCAAG  
CAGGAACC **A TCC** GT **G GATCC** GAATGGAT CAGCAACTGCCTATATTGTATCACTTCTCCGGAAGCTG **G AAT**  
TGCCGT **A TTC** GAACAATTCCTAGCTGGAGA **A CTC** CCTATAGGAT **A C** GACT **A TCC** TCCAGCTCCAGAT **G GA**  
**T** TAGTGATCGTC **T AAA** ACAACAATTCCTTAGGAT **T TT** **T TTC** CTGTAGTGGAGGAAG **A TTC** TGAGG **G AAA**  
TTGCTCAAGTAAGAAGGCC **T TTA** TAGATCTAGGCAA **T AAA** ACCCT **T TTC** CTACGAGAGGCCCTCTCCCGCT  
ATTA **G AGT** AACATCGCT **T TTA** GGAATAGATA **T AAA** AAA **C AAA** CAAGTAATGCCACAACAGCATCATTGGC **T T**  
**T A** CCTT **T TTC** TGGAACTTCAGTT **A CCC** GAACTCTTAATATACCATCTTCCAAACATACG **A CTC** T **A TTC** TC  
TCGCGCC **C AAA** TAGTG **A CCC** TAACCTC **T AAA** ACCC **A AA** AGCCTTCTAACAAAAT **A TTC** TCCTTCTCCTTA  
**C TC** AGGAGT **T TTA** AAA **G AAA** ACGCACCGTT **T TTA** CG **T TTC** CTCACACAATTAACCTAACCAACAAGCATAC  
**T C** ATTC **T GG** ATTC **A TT** GCCTCC **T AAA** ATTC **T TAG** TCAAATCC **G AAA** GAAGCCGAC **A CTC** GAGCGCTCTT  
CTCC **T AAA** AATCTTGTTT **T TTC** TCTGCTTCCGAGT **T ATA** ACGCGGCTGTCTCATA **A CCC** ACACCTAACATG  
AT **G AAA** CCTCTACG **T TTC** GGTTA **T TTC** **C AAA** CGCAATCTAT **T TTA** C **C AAA** TTACAGGCAGCG **C AAA** CTA  
**A A** GAACC **G AATTC** TTGTCCC GACTGCCAGAAT AATTG **G AAA** GAAGTCACCTACAC **G GAT** CAACTCCTGA  
**A A** ACATC **A TTC** ATGCTGATGATGCTTGTTATC **A CTC** TGTTATGTACAGGCTCTCATTGATATGCA **T TTC**  
TTAGATAGCTGCTGCCAGGT CATCGTT **G AAA** ACCAACTGCTTACTTAT **T TTC** TCTTCTACAGATGATG  
TTACGCGCAACGCCATTATCAACCTAAT **T AAA** GACCTTCC **A TTC** ATTCACTCCGTA **G AAA** TCTGCCAAGC  
**A TCC** TATCAAACCTGTCATCATCAAGGCCCTCATG **G AAA** GACTTCTCTTCCAGAACAACGTTCT **T TTC** TGT  
ACAAAGGTCTGTG **G AAA** AGAAGCTA **C AAA** GTTACCACAGAATACC **A TCC** T **A TTC** TCGCCTCTTGTAGCAG  
**A TCC** TAGACAAGCAACTAATAGTGCAGGT **A TCC** GT **T TTA** AACGACGAAGTCGTAG **G AAA** ACGTGTGGCTC  
TGCTACCTTCGGTGGAGAT **T TTA** TCTTCTTACGATTA **C AAA** ATGTCTCCGATTC **C AT** GGAGACAT **G GAT**  
ATTGGTCTCCAAGGAGCTGT **A TTC** TCTGT **T TTC** GACCT **G GAT** C **A TCC** AGAAGCTTGCATGGTCAACTCTG  
ACTTT **C AAA** TCGCCGC **C AAA** TGCAAC **C AAA** CAGTGAACAAATGGAGCTACCGCTT CAGACTATGGCATCT  
**T TC** TCTCATCTTGGCGAC **G AAT** **T TTA** **T TC** TTGCCAACAGTTACCTCC **T AAA** AACGTTATAATCGAAGC  
GATGAAGCCGTCGA **T TTC** CAAA **C TT** CT **T TTC** GTTAC **A CTC** CACAGATCCGTG **T TTA** TGGAGGTATT **G GGT**  
ATATCATTAGTCGAGATTC **A AC** **A TTC** CCTGAAGATCCCTCT **T TTA** C **C AAA** AAGGAGGTATCGAACTACGTCC  
**T TTC** **G GAT** TACGGGAAGACAACCTTCATGCCCA **A CCC** GTC **C AAA** CTATGCAT **T TTC** GCT **C AAA** GGAAGAG  
CATGACTTCTCTATAGACCAAACCTTATATAGTAGGCATG **G AGT** GGTCAAATTC **C A G GAT** GTAGGG **G AA**  
**A A** GTGCGCGCTGTATTG **G AAT** ACCACCAAGG **T TTC** TCCACGAAGGACAA **C AAA** TCCGAGAA **G AAT** GCGA  
TTATTATGGC **T TTC** GATTAAGTTATGGCTTCTAGCT **T TTC** TCAGTGCTCTC **T AAA** AATTACGCTGGACAG  
ATGA **G AGT** CTCATC **T TTA** TATTACCGTCCACCAT **C AAA** ACTC **T CCC** GTG **T TTC** ATGGAC **T TTA** GGTGG **T T**  
**T AT** **G AAA** AGAAA **C CC** TCACTTCGTATCATTAACAAAAATTA **T TTA** **T TC** GCAGA **T TTA** CAGAAGAGAGTC  
GCCCAA **T TTC** G **T TTA** GAAAATCC **C AAC** ATACAGTTATTA **T TTA** TCTATTGGAGATA **A CCC** AACCCAC  
**T AAA** TGCTAGTGTGCTGAGGCT **C AAA** CCAGCTCTATTGCCCG **C AAA** AGCTCTCTACAACCTGTGCG **G G**  
**AT** ATGGACCAGAC **C AAA** GACTACCTGCATTAAGACAAAATTA **T CG** GAAGA **T TTC** TATCGCGGCTGTGTT  
GATGCAAAA **G AAA** T **T TTC** **A TTC** **G GAT** GGAGCAAAAGCAGATCTCTCCG **T TTA** C **A TCC** TTT **C AAA** GTC  
CCAATCAAACAGTGGCT **A TTC** **A G GAT** C **C TT** CT **A TCC** TGCATATCTCGATATCGCTCGCTAACAGGGGC  
AAAG **G AAA** TTATCGCTCTCCCTTGCTTGCAA **G AAA** ATGC **A TTC** TCCAGAA **T TTC** CAGAGGAC **A CTC** CAC  
ATCGATAT **T TTA** TGTCTATGTTCTCCTAATA **A CCC** AACAGGGACTGT **T TTA** AATAAA **G ACC** AACTACGTG  
CGATCGTTCATTATGCAATAGAACACGAGATTC **C AT** **T TTA** CAAA **A TG** CAGCTTATAGCACCTTCA **T TTC**  
CG **A TCC** TTCTCTCC **T AAA** AGTATA **C AAA** AATTC **C TG** ATGCACGGT **C AAA** TGCAATA **G AAA** TCAATTCG  
TTCTCAAACCTCTA **G GAC** CAAA **C A G G C** **A TTC** **T TTA** GGTGGACCGT **C ATCC** CAA **G AAT** TGACTTATG  
CAGACGGCCAT **C AAA** TGATTC **A A G A C** TGGAAACGCTTCC **T TTC** AACCACT **T TTA** ATGGGGCTTCT **A TCC**  
CGCTCAAGAAGCTGGCGTTGCAGGAT **T G TCC** **A TTC** TCCCTCAACTTGAAGCGATCC **A CT** ATTATCGA **G AA**  
**A A** TAGCGACCT **A CTC** **G AAA** ACGGCTATTGGCAACT **G GAC** CAAA **A A G T** **A TTC** GGTGGGGAACACGCCCTT  
ATCTAT **G GGT** CAAA **A CCC** ACTC **A A G C** AACATCTCTGATAGAGATCTT **C AAA** ACTT **T TTC** TTACGA **G AGT** A

CCATATCGCAATTACGCCAGGAATGGACAAAGCCGTAGTGGTTCGGACAAATACGCTTCTCTTCCTTA  
GGGAAACGTGAAGACATATTAGCAGCCTGCGAACGTTTACAAATGGCTCCTGCTCTGCAATCATAAGGCA  
AATATGCTCAAAAGAAAATCAAAATGGCTATCTTTCAAAATAGTTCCTAGCAAAATCTTTATTTCCGTC  
TTGTTGTTTCCTTTCGTTTCAGAACCAATAACGCCTAGCATTGCTATCTTCTCTTCCCTTTCCATAATTC  
TCTTAGTGAATGCATAGAAGTGTCAAAAAGAACTGACCAGCAAAAGGAACATGCCACTATCTCTCTA  
TTTAATGCTGAGGATAATGTAGTCAAAGCAAGAAAATCGCTCGCACCCTTCAATAAGACCCTAATGTTG  
TCATGATCATTACTTTAGGCCCATTTGCAACTAAAATAATGAGTCAAATCGAAAACAAAAACCGATCAT  
TTATGCTGTTGTCCTGCAGGAGAAGCTCTCCGATTCCTAAAAGAGCAGGTTAATATATACGGGGTAAAT  
GATAGCGTAGACAAAAACCAATGTTGTTTCGCGATTCATGCGGTAACCAACAACGCGAATTCGTTGGTTT  
ATCTACAACCCACGAACCTTTCCTTCTTCTTACAGGAAAGAAAATACAAAATAAACTCCGCGCGTCAGG  
CATTAAGTGACAGAATTCCTATTTTCGAGCCAACATGTGCTCTCGCATTCAGTTTATTGCGAAAAT  
CGTCTTCCGCAGTCTTTTTCCTTTCCTTATCAAAAATAATGGGAACGACGCTCATTAAGGCA  
TCTTAAGAAAATATTCCTCTGATCACAGATGACTTTCCCTTGTTATGGAAGGTGCTTGTGCAGCATG  
TAGCGTTGATTATAAACTATCAGGCAAAACAAATAGCCTGTATCGTTCGTTACAAACTCAGCAAGAAAAC  
AATGAAGAGCAAAAAACCAAGATTAGCGCAGAGCCGATCCTTTCCTAAAATTACTTTCAATGAGGAAATTA  
TCCGGTCTTTAGGACTTCCATTTAATATGGCTCCGGCTCACCAATTTATCTCTTTCCACTCTGCGAGATAA  
TACTGGATTAGTGACTTTTACAAATCCCTTAATCCCTACTATTAATAATCCCTCTATCATCATCGAAAAGAT  
TCCGAATCTAAACTCTCATCTTGAGGCATAGAGAATAGAGTATCCCTCCGGACAGAGCTCCCCATCCC  
GCAAGCGTCCCGTAGAGAACGAGGGTCTTCCACAGAAGGACTAGAACTAAAATACGACGCGTAAAGGGTT  
AATGAATGTGCTGACGCATGTAATAGTCTGTGTCCTCAGACTCAACCTCTACCTCCTCGATATCCAA  
TGAAGAAAACGCAAGATCTGGTAGTAATGGCTCGCAAAGCACCCATTAATAATGCTCTTGCAAAACCTGAC  
AGGCTCTTCTTCTACAGAACAGCATGCCGTTACCTCCTTTCAGAAGCTTGGTCATTAATGCTCAAAGG  
TCCGTCATCATGTAAACGTTCCGCAGAACGAGCTAAGTTGGAGATAGATTGATTAATAGAGCCGACCTCT  
CCGTTGGCTCGAAGTCTCCACTCCCCTTTCCTCATTGACCTCTAATCCCTAACTTATGTAAGCGAGCTAGAA  
CCGTATCGCTATCCCTTACCATAATGGACTTGAGATCTTCTTGGAGAACTGCACGAAGCGTTTATGTTAG  
TGTTGCAAAAGACGCGTTACTAGTCTGCGTGATGACGATTCCTCTAGCTAATCTTCTTAATGAATGT  
CGTTTATGCGCAAGCCATGACGAACAAGAAAGGGAGCGGAGTCTCTGGTTTCTAGCTATCTTCTCGAT  
GAGAATTAGAACGATTCGTTCCCTTCAGAGCGCTCTTAATTCCTTACCCAGGAGACTCTAGCTGCTCTTC  
ACTAGAAAGAAATCGCTTGCGAGTAGAGCTTCCATGTCTTATCCAGTTTCTGCACGTTTCGCGTCTTCTTC  
TCCATTACATCCGCGATGATCTCAGCGACTTCAACCTCGCCAACCTGCTCCTCCACACTTGGAGAAGATG  
CCATTGCATCCGACTGAATAATCGGAAGTGAAGCTGCTGAATATCTTCTGCAGAGGTACTCTTCCCTAC  
AGCAGGAAAAGAAATAGTCTGACCAGAGGGTGTGACCCCTTCGGGATTCATCCCTTCGTTCTCCCTAGAA  
TTGGGAAGCCTCTCAGGAGAAGAACCCGATGTTCTTGTATAGAAGACATAGAGATTTAAAACAAAACA  
AACAAAAACGCTTAAATTAATTTAAGAAAACAAACAAAAGAAACATCAAGTTATTAAGAAACAAAGAAATC  
TGAAGTAGTTAAATCCCAATAAGAACAAAAAATCACAGAGATTGATCTAGAAACTCCTATGCTAAGA  
TGCTCTTCCACACGAAACAATAAAAACACTTCCCTATGAGAAGCTCCCTTCTGTTTTACAGAAT  
TCCAAAAATGCAAAATAAGAAAGCCTCCGTTCTTTCCTACGAGCTTCTTCAAGAAAGGATATCTTTTCA  
AAACATCTAAAGGGATTTACTCATAACACCTCTCTTCCAACGAGTATCCATAAATGACCAAAATCAT  
TCGTGAAGAACTCAATGCTATTGGAGGACAAGAGGTCTGTCTCCCTCTCCTGCAACCAGCAGAATATGG  
GAAAACCCGGTCTGTTGGAAGGCTTCTTATCGAAAATAACTCTATGTGCTTAAAGGATAGAAAATA  
AGGCAATGTGTTTACCCCTACCGAAGAGGTGTCTCTGAATTCGTGGCTCAGTGGCTAACAGGACG  
AGAACAGCTCCCTATCCACCTATAACCAATCGGAACCAATTCGAGATGAAATCCGACCTCGCAAAAGG  
CTTATGCGTGCCAAAAGTCTTAAATGGAAGATAGCTATACTTTTCTGACTCTCCAGAACAAATGGAAG  
AACAGTATGCAAGCTACGTCTAGCTTACCAGCGCATCAAAATCGATTAATCTCAATATGTAATTGT  
TGCTGCAGATGGGGGAAAATTGGTAAGGGAAAATCTGAGGAATTCATGTTCTCTGTTCTTTAGGAGAA  
GACACGATCTGTGTGAGTGGGTCTTACGGAGCGAATGTAGAAGCAGCACAAGCAATCCCTCCATCCATG  
TTTACGATTCAAACCTTCTACCTGTAGAAGAAGTTGCGACTCCTAACATTCGAACAATTGAAGACTTAGA  
AGTCTTTTAAACACCCATAACAATAACTGAAACTTTATGTTGTAAAATCTCGCCAAAAGACTCG  
GAGAAAATCCAAAAGCAAAATATCCGAGGGGATCGTCAGATCAACTTAACCAAGTTGCATCTTTCCTAC  
AAGTTGATGACTGCGAGCTGGCTTCTGAGGAAGAGATCCCTAAGCATCTTCATGTTGAAAAAGGATTTAT  
CGGACCTCTATACTGTCTTATCCCTGTATGCAGACGAAAACACGCGCCCAATGACTAACTTCATCTGC  
GCAAAACAAACAAAAGACGTGCACTGCAAGCATGTGAACTGGGGACGCGATATCCCTCTTCCAGCTTTCG  
GAGACTTCTTTAGCAGAAGCTGGAGACCAAAATCCTCAAAATGGAGGAGCTCCCTATGAAATTTTCA

AGGCGTCGAAGTCGCTCATATCTTCAATCTGGGAACCCGCTATACGGAGAGCTTCTCCGTAAGGTTCAG  
GATAAA AATGGAGA TAAA CAGC CAAA CTGGATGGGACATATGGTATTG GAGTAGGGAGAACCCTTGCTG  
CATGCATAGAACAGCTCGCTGATAACAAAGGACTGG CAAAAGCC TTTA GCTGTAGCTCC TTTCCATCAC  
CATTCTCTATAACGGTGGTGATACGGAAGGAGAAGCCACCGCCTTACAAC TTTA TCAAAGCCT GAATACT  
GAAGGC CAAAAGCCTCTACTAGATGATCGCAATGAACGCCTT GGGTTTAAGT TAAA AGACAGCGA TTTAC  
TAGGTATCCCGTACAAATTGATCATCGGGAAGTC TTTCCAAAGTACAGGCTTATTA GAAATC GAATCAG  
CTCAGGA GAAAAATGTAATG TTTCTCCT GAAA ACCTATT GGAT TGGTGCTC TAAA AATCTTCCTTGT  
ACAA GAAA GATCC CTCC ACTCCGAGAACAAACTAGC ACTCTTTA GTTGCAGCGC TAAAATTC TTGACC  
GGTGGAGACGGT TTTCTTATAATGACACCGACTTATG GAAAATA GAATA GAAA TGTCCCAACTGCGAGCA  
TC GAAA AAAGATTCAAAGA TTTCTGTATGTTCTACTTATGGCAACTAAGCTCTACCTAGAGAGTGGCCAC  
CAGTAGGCTC GAAA CTTCTTGAG GAAA CTTATTGTTCCGATCT GAGT TCGGCAACGATAC GAAA TTAC CA  
AACTCAGCTT GAAA C GAATGGAT TTTAC GAAA AAATCATATCTCCGGAGGGAGGATCCCCACAGATCTA  
GCT TTTCTTTATTATGCGGATCATAACGCGCCT TTTCTTGAGCAAGAA GAAA TCTTAGCAATCC AACAAA  
AACTGACAGAGCTTCCGGAATACAGCAAAAATATCG TAAAGGATCTGCAAAAAGCCTCAGAGGTGCTCTC  
CGATATTC TGCAA ACTCCCTGTCTGCTTCTCTTACCTCGTCAAAAAA GCGATTC CGTTATTAATATTCAA  
CTCGTAGCTATAGATGATCAACGCGTAGTC CAAA TACTCTCAACT GAGCAAAGGCAAGTTTTTA CAGATG  
TCC CAAA GCTACCTGAACAACCTACCTGAGA ACTCTTTAAAAA GAAT TGAGGGT TTTCTACAAAATTACTT  
ACGCAACAACCTTCCGATAGTCTCC TTTCTCAAAAAGAAGAAGA TTTAGGGATGGTCTTGTATAATGAA  
GTTGTGGTCCGTTACCTT ACTCGTTACTGCCAT TTTA GCGAGGAAGATCTGTACCAAACAGGCCATCCA  
GATT ACTCAATAC GAAA CTTTCAAAGATCTT GAAA CGCTCGCTCAAGGTCTCGC TTTCCAAAAA ACCG  
TAAA CACATGTGTCAACT TTTAAAA TACTTACCTGCATAAG GAAA CTCCTACCGCA TTTATTGGTCGAGAG  
CTTACTGATATCGTTGG GAATACCG ATCC TTCGTGTGCAGTAATTACT ATTC CTTATTACATGGACCGTA  
CTCC TTTAGGTGC TTTCTGGTGTACTAGGTCTATGAACCTGCCTTATCAACAGGTATTCGGGCACACTGTC  
CTTATTCACAGAACGACTAAAAGTC ATTC TAACTCAAGTT TTTA CAAG TTTAAA TTGTCA TTCAGAAGA  
CCTTGCCCGACCG ACCCTAGATGCTCACAAGACCAGCAGAGT TGACTCGGAGCTTCTATA TAAA ATTAT  
TACCTGCTAAGGAGCTATCATGACA GAAA CCCCAAATACCTCGTCGGAAGAAA TTCAGACTAGCGAGCCT  
TCACCTGACAATGA ACTC CAAGTGCTCCAGCAAGAAA ACGCCAA TTTAAAGGCTGAGCTGCAAGAACAGA  
ATGATCGATATCTGATGGCTCTCGCTGAAGCAGAAA ACTCAAGAAA ACGACTACAGAAA GAACGCACAGA  
AATGATGCAGTATGCTGTAGAAA ATGCTCTTATGGATTTCTTCTCCTATCGAAA GTATG GAAA AGGC  
AAAGGATTC GCTTCTCAAACCTCTGAAGAAG TAAA AAATTGGGCTATA GGATTC CAAATGATCC TTCAAC  
AATTTA AGCAAATCTTCAAGAGAAA GGTGTGGTT GAATATTC CTC GAAAGGAGAACTATTTAATCCGTA  
CCTGCATGAAGCTGTA GAAATCGAA GAAA CCACAACAATTC CAGAAGGGACTATCTGGAGGAA TTTACT  
AAA GGTATAAGATAGGAGATCGTCTTATTC GCGTAGCCAAAGT GAAA GTAGCAAAACTTCCTGC TAAAG  
GAAA CTCAGACAGTAACGAAGAAA AA GAATAATT ATCC TAGAAA TTAGGTGTTCAATATGAGC GAAAAA  
GAAA GTCTAACAAAATATTGGTATCGACCTAGGGACGACCAACTC TTGCGTCTCTGTTATGGAAGGTGG  
CCAACC TAAA GTTATTGCCTCTTCTGAAGGA ACTC GTACTACTC CTTCTATCGTTGCT TTTAAA GTTGGC  
GAAA CTC TTGTTG GAATTC CTGCAAAACGTCAGGCAGTAACCAATCC T GAAAAACATTGGCTTCTACTA  
AGCGATTCATCGGTAGAAAATTC TCTGAAGTC GAATCT GAAA TAAA ACAGTCCCCTACAAAGTTGCTCC  
TAACTC GAAAAGGAGATGCGGTCCAAA ATGTGGAACAAAACCTGTAC ACTC CAGAA GAAA TCGGCGCTCAG  
ATCC TCATGAAGATGAAG GAAA CTGCTGAGGCTTATCTCGGA GAAA CAGTAACGGAAGCAGTCATTACCG  
TACCAGCTTAC TTTA ACG ATTC TCAAAGAGCTTCTACAAAAGATGCTGGACGTATCGCAGGAT TAGATGT  
TAAA CGCATTATTC CTGAACCAACAGCGGCCGCTCTTGCTTATGGTATTGATAAGGAAGGAGATAAA AAA  
ATCGCCGCTTTCGACTTAGGAGGAGAAC TTTCTGATA TTTCTATCTTG GAAA TCGGTGACG GAGTT CAAA  
AAGTCTCTCAACCAACGG GGATACTC ACTTTGGGAGGAGACGACTTCGACG GAGT CATCATCAACTGGAT  
GCTTGAT GAATTC AAAAAACAAGAAGGCATTGATCTAAGCAAAGATAACATGGC CAAA CAAAGATT GAAA  
GATGCTGCT GAAA AAGCAAAAATA GAAT TGTCTGGTGTATCGTCTACT GAAA TCAATCAGCC ATTC ATCA  
CTATCGACGCTAATGGACC TAAA CA CAAA GC TTTA ACTCTAACTC GCGCTCAATTC GAACACCTAGCTTC  
CTCTCTCATTGAGCGAACCAACAACCTTGTGCTCAGGC TTTAAA AGATGC TAAA TTGTCCGCTTCTGAC  
ATTGATGATGTTCTTCTAGTTGGCG GAATGTCCA GAAT GCCTGCGGTACAAGCAGTTG TAAA AGAGATCC  
AAA G TAAA GAGCCTAA TAAA GGGCTCAATCC AGATGAAGTTGTAGCGATTGGAGCTGCTATTCAGGGTGG  
TGTCCTCGGCGGAGAAGT GAAA GACGTTCTGTTGTT GGATGTGATTC CCCTCTC TTTA GGAAT TGAGACT  
CTAGGTGGGGT CATG ACTCC CAAA GTAGAGA GAAA CACTACAATCC CT ACTCAGAAGAAGCAAACTTCT  
CTACAGCCGCTGACAATCAGCCAGCAGTGACTATCGTCTTCTCAAGGTGAACGGCCTATGGC GAAA GA



CAATAAGGAAAATTGGAAGACAAAATCTAACAGACATTCCTCCTGCTCCTCGCGGCCATCCACAAATTGAG  
GTAACCTTCGATATTGATGCCAACGGAATTTTACACGTTTCTGCTAAAAGATGCTGCTAGTGGACGCGAAC  
AAAAAATCCGTATTGAAGCAAGCTCTGGATTAAGAAGATGAAATTC AACAAATGATCCGCGATGCAGA  
GCTTCAAAAAGAGGAAGACAAACAACGAAAAGAAGCTTCTGATGTGAAAATGAAGCCGATGGAATGATC  
TTTTAGAGCCGAAAAGCTGTGAAAATTACCACGACAAAATTCCTGCAGAACTGTGTAAGAAAATTGAAG  
AGCATATTGAGAAAATACGCCAAGCAATCAAAGAAGATGCTTCCACAACAGCTATCAAAGCAGCTTCTGA  
TGAGTTGAGTACTCGTATGCAAAAAATCGGAGAAGCTATGCAGGCTCAATCCGCATCCGCAGCAGCATCT  
TCTGCAGCGAATGCTCAAGGAGGGCCAAACATTAATTCGGAAGATCTGAAAAAACATAGTTTCAGCACAC  
GACCTCCAGCAGGAGGAAGCGCCTTCTTACAGACAACATTGAAGATGCTGATGTTGAAATTGTTGATAA  
ACCTGAGTAAGATGCTTTATTATCTTCCCTTAAGCAAGAGCCTTGTGAAAAGGGGCTCTTGCAGCTTTT  
TTTTAAA AAATCCTTCTCCTCTCTTCTTTCTTAAAGAGTAATTAATCCCAAATTCATGTATGCTAGATAG  
TACGTATCTTGACTGTTATGGCAAAAACATAATTC TAAGAGATGTTGCATCATCAAAAACCGGCTGCC  
TACTAACCCAGACTTCAAGATGCAAAAACATTCCTTGGGGGCAAAAGAAGTAA GAATGTACCGGCAGTA  
CGACAGTAATGGAGTTAGCTTGTGGAAAAGCTAAA AACAAAAA GAAATTTCTAAA AAATA GAAA GCAG  
GTTCTGGTTCTGGTACCTTATTCGTCCATTC TAGAAA GGGCCAAA GACAAA ATCC CCAGATCAACCGG  
AGTTATATCCCTCAAAATATTTTCATCTCAGCTAGCGACTTAAAAGGTGC AAAAGATGGAGATCATGTTCT  
CGTGGCTCTCCCTTTCTCTCGTGGAGGAGAAA AAAGAAAAGGGTCAATTCATAAA GTTCTTTCTCGA  
GGGAAAACAGTCTTAGTAGGGACTATTGTCTCTCTTATCAATCCAACTCTAGCTATGGCAAA TGTGAATA  
CCATAGGCCCTGAACATCCTTTTAAAAGCCGAGCTCTTACCTAAAAGGACTTACAAACTGGGAGATCGGTT  
GTTACTAAA AACTCTGTGTGGAAGGAGAATATCC CAGTAAA GAACCACCTCCCTTGGCTATGCTGAA  
TTTTATAGGCAATATCTCTAATGCTAAGACAGATTTTCCTGTTATTAAGCCGAATTC TCTATTACAGAAG  
AGTTCCCGATGCAGTGGTACAGGAAGCTAGTCAGTTCTTACAAAAGCACGTAACACAAGCGTTACTACT  
GAGGAAA GATCTCCGAGA CAAA TTATGTTTCACCATAGACTCTTCCTCTGCTAAGGAC CAAAACGACGCA  
GTCTCACTAACTTATGATCATGAGGAAA ACTATATTC TAGGTGTT CATATTGCGGACGTCTCCCACTACG  
TGACTC CAAATTC CGC CAAAGATAGAGAAGCTGC TAAA CGGTGC AACTCGATCTACTTCCCTG GAAAAGT  
CATCCCTATGCTGCCCTCAGCCC TTTC TGACAATCTGTGCAGCT TAAAACCTAATGTGGATCGCTTAGCT  
GTATCCGTATTTATGACTTTCTCTAAAAGAGGGATTCTTTCTGACTACC GAATCAA CGTAGCGTCAATC  
GTAG TAAA TACCGTATGACATACGATGAGGTAGATGAAATTATCGA GAAAAAACAGACTCACCTATTTTC  
TAAAACCATTTTTAAA GATGGCTGAAT TGAGCCGTATTTT TTTCTGACTCCGAGAACACGTGGATGCAG  
CGTCTCGTTCTTCTTCTCGTTACGATGTCTCTTGATAA TTTA CAAGAGCCTGTAGCCCTTATC GAAAACA  
AACAAACAGCTGCTCA TAAA ACTCATTGAAGAGTTTTA TGCTGAAA GC GAATGAAGTGATAGCCTATCAGAT  
TTCCATCAGGGAATAACCATGCCATTC CGCACACATGAACCTCCTAATGAA GAAA GTCTCCTGTGTTT  
CAAGAGACAGCAAAGGCTATGGGCTTACCATTACACAAA ACCCGGCGCAAGAACCAGATTACCAATATT  
TATTGCAGGAAA CGACTGCAGGCCATCC CAAA GAGCCAATCC TTTCTCAG CAAA TACGCAGTATGAA  
GACGGCTTCTTATTC TACG GAAA ACAAGGCCATTACGGTCTGTGCTTAGACTACTACACACACTTTACT  
AGCCCGATCCGCCGATACGTGGACAAA ATCGTTCACCGACTGCTTTTC ATTC TCTCTGTAGAAGAAG  
AGCATCTTGAACAAATGTTTCGAGCCTGCTCATCC CAAGAACGCATTGCAGC GAAA GCTGAGGGAGCTCA  
AATAAA TATTAAGAAGGCTCGCTTCTT GAAAAAATTC ATAGAAGAGCAGCCTGCAACTCTTTATAAA GCT  
TTCAATTATTACGGCATCCCGGAAGGGATCTCT CAAA TCCTCCCAGAAT CAAA TCATGAAGGTTTCATTC  
CTGCGGC TAAA CTACCTCAAGCGTACGTCTTCAAACAAAATA GGATTAGAAGAACTTCTTGAACA CAA  
ACGTCTGGAGCTGTTA TTTCTGTGCAACTGGCTTCTGTACCTTGTCTCACACAGTCTATC GAGTGGACG  
TTGGTTGAAGCCACAAC TAAAGC TAAAGCAAAGCGTACCTC TAAA AA GAAAAAACA GAATCTGTACGA  
CTAAAGAAAAGAAA AA GAGTTCTGC TAAA AAGAAA AAAGGAGCTACCAAACGAAGAAGGGCAGTGG GAA  
AAATTAGATCC TTCAAATTATTC CTTACATGAATTT CAAATCTGAGCGACTTTCTCCATT GAAA AAGAT  
TTTC TAAA CAAAACGTGCTTTA CTTCTTGCA GAAA AATCGGTAAA CTGCCGTTTC GTCTAGGCAGACT  
CGTCCGCTCTTT TTTCAA ACTC CTT TTTA GGAAGTT CAAA AAGGCGTTCCTCAGAT TTTCCGAGTT  
GGAGGAGACTGGCCGGCACTACAAGCTCATATCAAGGTAAG GAAA GA TTTCCATGCATGACGCCCTCCAA  
AGTATCAAAGCTATCC AAGAGCTCGATAT TAAA ATGATCCGTCTAATGC GGGT CAAAAAGAACATCAGA  
ACGAGCTCGTAAA ATTC AAGC TTTAAA AACGGATATCCGTGCAAGGTGGAAGAAA AAGAACA GAAAT  
GGAGAAGCTGAAA GATCAGATCAAAGGCGGA GAAA AACGTATTC AA GAAATTTCTGATCAGATCAA TAAA  
TTAGAAA ATCAGCAAGCTGCTGTAAA AAAAATGGATGAGTTTTA ATGCTCTAACC AAGAGATGACCGCAG  
CTAA TAAA GAGCGTCGCAC CAAA GAGCACC AACTTAGCGATCTTAT GGATAAGCAAGCTGGTAGCGAAGA  
TCTTCTTATCTCTCT GAAAGAAA GTCTCTTCTACG GAAA ATAGTAGCAGTGCTATCGAAGAA GAAATT

CGAGAGAATATTCGAAA AATTAATGAAGAAGGTCGTTCTTTA CTAAGTCAGAGAACACAGCTGAAAGAAA  
CGACAGATCCAGAATTA TTTAGCGTCTACGAGCGTTGCTCAACAACAA GAAAGACC GAGTTGTTGTCCC  
TATCGAAAATCGTG CAAA CAGTGGCTGTCATATAGCTCTT ACCCGCAACATGAGAA CAAA GTACG TAAA  
CAAGATCATCTTGTAT CAAATGAACACTGCTCAA GAATTC TTTA CTGGCAA GAGT TGAAGCTCCATCAG  
CAGAAGGCGCAACTACAAAACGTCGTCGTCGTCGTA CTGACTGCAGTATAACGAACTAATCGGAA GAGT AAGGC  
AACCGCT GAAA CCAGCTT TTTAAA AAAGAT GAGT ACCAGAG GAAA GTCCGGAC TTTA TAAG AAAA AGATGC  
TGGAGAAA TTC CAGGGGCGTAAGGCTACG GAAA GTGCAACA GAAA AC ACTC CGCTA TAAA TTGTATAAT  
TTA TAGACAGGCT GAAA AATCTTAC TTTAG GAGT AAGAGCTGCTAGG GAAA CCTAGCAGACTTG TAAA CC  
CCATCTGAAGCAAGA GAAA AAGTTA CAAAT TTC TGCAACAACC TTC TAAC GAAA GGCACAGGCTT TTT  
CATAATCGCTTGAG GAGT ACAGTAATGTGCTCCCTAGAT GAAT GGTGCCC CGCAAGCAAGAACTTCCGTT  
CGTGCTTGTCGACA GAAT CC GGCTT ACTC GCTCTTCCGAGCTTTT TTTATTATAATA ATCC TGCACGTGC  
TAACGCATGCATGTGTAGTAGCCCAACAAT GAAA CGTTGTTGTTGAGCATCAACTACAGGAAGTACGGTC  
ACAGGAT TTC CAGATTC CATCA TTC TAAGCTCAATAGTAC ATCC GAAT CCA GAAA TAAC TTTA GGGT  
TACGTGTATGATCTGTTGTAAC GGGT AAGC TAAA ATATCTCCTCCGT ATCC CAGACAATCC TCTACG TAA  
ATCTCCATCTGT GAAT ATCC CTAATA ACTC GAAA AGCTCA TTTA CTACACAGACAC ACCCAT ATCC ATAC  
GAA GAAA GTATAGGAAGAGACTC TGCAACAGTAGTTAATGGAGAGCA GAAA GGCAC TTCAGTTCTT GGGT  
ACAAA TAATCCAAA AC TTC CCATTC GC TTC AAGCCTATCTGTCCACTGGGAT GGTGCTCCCATAATC  
CGACAAG GAAA TTC CGACAACGTAACAGTGTCA TTGCTAGAAAGATCAGAAA AAAGTAATTGGCATGTG  
GTTGAGGTTGTAGGCATAAGATCAAAA GGAT CTA ACTC TTCTAAC CAAAGCAGTACAACAACAAAATCAG  
AAA AAGCGGC TAAA CTC GAGCAGCGGTGCAGCAGTGATACCAACAA GAAA AAT GGGT CT ATTC TTCAAATG  
CGGAATCCATTC TAAA ATCTCTC GAG TTC ACCACTA CAAAAA ATAGACAACGATATCTCCTGGAGAA  
ACAACCC TAAA TCTCCATGGAGAAGATCTCCT GAAA GAAA AAGGC TTC TCCCAAAGATTGCATCG  
TCGCCACTAACTTACGGCGGATGCAACC ACTC TTC CT ATCC CAGAAA AAAATACTG ATCC CTGATGACA  
AAGAAGTT TTC TG TGAGCTGATGAACGCAATCATAAT GAAA GCTAGC GAAA TACTGAGAAA TAACCTGT  
TCAA CTTAT GAAA AATATCTAAA CAAAGTTCTCTGCAATGCCTGGTACGTACATTACT TTC ACCGCTA  
TAT TAAA AAAATGTCTTCTAGCTCATCGTAACAGACTC TAAGCGATT TTC CAAAGCTGT TAAA ACTCTC  
CACCG TAAATTC CATCCAATACTC GATGGTC GAAA GT TAAAGTGACATACATCAT TTC CTAATGGCTAA  
CGAGTCATCATCACGTACAACC ACTC GTT CAAAAAT TGTTCCG ATCC CCAAATCGCTACTTCC GGATAA  
CGAAT TATCGGCATGCCAATAAGAGCTCCAGTCATACCAAAGTTGTTACAGTGACGCTTCCCC TTCG  
TTTC TGAG GAAT CTAA TTTA TTAGATCGCGCCCTTGAA GAAA GATCC GCAAGAACCTTAGCAATACTTAC  
AAG ACCCT ATCC TGACAATTAT GAATAACAGGAACA ACTACTC CTTT TTTATTC AAA TTTA CAGCAACT  
CCTACA TTTA TAGCTTCTTGAGGACAATCGT ATCC CCGTC TAAA GAACCATTAAGCAGTGGAACTGCT  
CTAAA GACTTAGCTAAGCACTGTATAATGAAGCTGGTGATCGT GAG TTC ACTC CATGAGCAGCAG TAAA  
TCTCTCTCGTCCGCAGAGATGAG ATTC AT TAAA TCTGTAACATCTACATCAACAACCAGAGAAGCATGC  
GGCACCTCTTCTGAAGACTGTGCG TAAA GAAGAAGCGATAGCCCGACG TAAA GGTGACAAAAG GAATTC TAT  
TTTC CTC TTTA GAACAGATCGGATCC CTAGGTTCTCTTGTGCG GAAA GATAGCGTTCTACATCC TTACG  
AGTAATCC GTCCCCCTCTCCTGTCCCGAGATCT CAAA TAATTC TTGAAGATCTA ACCCT TCTC CAAA  
GCAAATCC TAATACTGCGGGCGAGAGCCA TTC TGCTCTCTATCTACAGAAT GATTC TCTTCTTAACAG  
GATTC TCCACAGGGCTT TTTA CAG GAGTATTC GCTGCAGCGG TTC TCGCAAACGCGCTAGAAT ATCTCC  
AGG GAAA ACCTCTTCCCCTTCTG AACCAGGC ACTC CTCAAATGCCAGCTTGAGAAGGAGCTA ACTCT  
GTAGCTATCTTATCTGTTGAGACCTCAATCAATGGCTCATCTT CAAA AACAGGAT CTCCGACCTG TTC CA  
ACCATCGGACAACAATACCTCCAGATGCGGTCTCCCCTATT CAAAGAAATC GAAA CTC GAACAT GAATCT  
CCTTA TTC TGA ACTC GAAGGC TTTA GTATTC TGTTA ACTC AATATGAGAAGAAGATGATCAACTGGCT T  
TTA CAGA TAAAAAATGCCT CAAA AGG TTTAATAACAT GAAA ATCTGTACTC ACTC ACCTGAAGGCGGTTAA  
GCACTC CCTATGTTACAC TAAA CATTT CAAAAA CCACAGAAA AGACGCT TAAA CCT TAAAGAAA ACGAA  
GAGAGAAA ACCCTCTTCGT TAAA AGATCTCTAACCATGTTGAGGAA GGATATCC TCTTACCC TCATTAG  
AAGAGGAGA ACTC ACCTTCTCCATCTGCAATATA TAAA GTAACAAC TGCATCC CTA GAATATTC ATAGG  
AGT GCCATGATATCTCTCAAACGATCG ATCC CAGCTAAGACTGCG ATCC CTT GGATAGGGAGT CCCACA  
GAAGTGAGCACAG ACC TAACGTAATC ATTC CTCTCCAGGG ACTC CTGCACTTCTTACAGCAGA GAATG  
TCGCAGTCAAC TAAA AGAAG TAAA CTAGT TAAAGAAA GAGGACAATTATATGCCTGAGCAA TAAA AAC  
TGCGGCC ATCC CTT GAAA AATTGCCGTACCGTT CATGTTGACAGTGCACCTAAGGGGAGCACAAAACCT  
GAAA CTCTGAA GAAA CGCCGAGATTT CAAAAA CGCAGCGCATAGTAACAGGCAGTGTGTCAGAACTAC  
TAGCAGTCGATACAGCACAAGAAA TGGC ATCC ATCATCGACGACAAAACCTTG CAAA TGAGCTCCTGCA

CCC TAATCGAACTAAGCCCC GAAT ATCAATATAGCATGACATATACAGGC TAAA TAATAGACAACAAGA  
AACTTGCCTAATTGAAGTAGGACGGTCAGACCATGATTGCCAGAT ATCCAAGCCATACTTGTCTGCA ACTC  
CATAAGGAGCAAAAGACATAATCATA TTTA CCATGCGCAGCATAATCTCATTAC ACCCGTGAACAAAACG  
TTCCACAGGGCGAGCAGCTTCTCCAGCTAAGCGCATAGCAATGCCTG TAAA CAAAGCAAAGATGATGATC  
TGTA GGATATTC CCTTCTACAAAAGAACG TAAA GGA CAAAAG GAAA CACCTGAGC GAATGTAGC TAAAA  
AATTCATCCCTCCAGATG ATCC GGACGAAGCAAG ATCC ACTGCAT TAAA ACCTTGGAGATCAC ACCCCTT  
TC CAGGACT GAAA AACAGAGCAAAAGCTA ACCC AATACCAATAGCAACGGAAGTTGTCTGCTAGATACAAA  
CCC AAACCTTCTTAAGCCTATACGCCCTAA TTTTTC TCATATCGCTAATCGAAGCG ATCC CCAAACCATAG  
AGCAAAAGACTAAG GGATATACTACCATGCTGAGTAGA TTTAAA AAGAT ATCC CCAAAGG TTTT ACAAA  
AACTGC CAAATCTTCCGAAT TAAGCCG GAAA CAACCC CGATAATTAGGCCTA TAAA AAT TTTT CATCCAT  
AA TTTT ATGTAGTT ACCCTCTT ATTC TTCTGGATGGATTCTATTGC ATCCAACATGGCCACC ATTC GTCT  
TTT CATTGCAAACGCAA GAAA ACCGCATGCGGACTTCTCCAACCGGCAATGATA TTTT TTCAGCAAGCGCT  
CCTATT TTTACGCT ATCC TTTT TGTACACAGGAT ACCA ACTC CTGGCGCAAAAATGAT TTTT TTACAAA  
AAAGTTCTAACTC TTGC CAAA TTATGCCACATGGTCAGGTAATAGATACGTACC TAAA ACAT GAATCCC  
TGCATCTCTTAACATAGCTAAG AATCC TTTAG GAAA CCC TA ACCC ACAAAT ACCC CCACACCTAGACCT  
TCCCAATGATCTCGAGGCATG TTTA CAGATTGATTC AACCAAACAA TTTT C GAAA TCTGAGGCTCGATCA  
CGATCTTCTCTTCG GGGT GCAATCGATCCA ACTC AC GTTGATCGGAAGGCGAACATCTACCATTAATCAT  
GACGTAATCCGCCTTCGCCAATC TTTT TGGGAAGTCTCGAAGTCTTCTCCT CAAA G GAAA AAAGAGCCTCCT  
CCAAA GGATCC GAACC ATTC ACTAATACAATCTCTACATC TTTA TGAAGGCGATTGTATT GAAA TCCGT  
CGTCCAACAACAAAACATCAAAA ATCC CCAGC ACTC TTCTCCGCAA GGGT TTTT GGTCTC CAAA ATCCG  
TACCGCCCCTGACGGCAAATGCTTGGCTAAGAGCAAAGTTTCTTCCAACACAAGAAGCGGTGTGAAGC  
GCT GGATTCACAATAG TAAA CGCTTT TTTT TTA CTATA TTTT CC CAAA ATCC TCTC GAAA GCACCGCAC  
AAGAAA GCCCTC TTTT ATGCAGTGCTTGGGCTAGCCATAACACCAAAG GAGTCT TTTT CTGTCCCGCCAAC  
AACGAT ATTC CCTAC ACTC ACCACTGTGTGCTTGTACTTGATGAGGAGATTTT GCAATCTTATGTCTGCAGC  
CAAACAGAGCCA GAAA AC ACTC TAGCTATGACTGCCCAAAGCCAGCC TAAA CGATCAGACAAGGCTCCAG  
AAGTCGCAGATATGATGAGATGACG GAAA AGGTCTC GAATACCAGAAAAGAAA CT GAAT CTCATGGGCGC  
CCT ACTC AAGTTCTTCC TAAA CGAACACCTGCAAAA ACTATGACA ACCC TAAA GGGCTGAGACAGACTC  
TTCGTCTCT TTTA CCC AAGTAGCCTTCCAACGAGGGC ATCC TGAAGGATCGCATA TAAA ACAT TAAAA  
TCAAG TTTT CAAA ACTT GAATCATAAA AGATTTT TATACTTC CAAA TCGAACGACCTCATAAGCAACAGC  
TGCAACAGAAGAAGAAA GGT TTTA AT GAAT CTGCT TTTT CCTAACATAGG TAAA GCTATGTTACAAAACTT  
CC ATTC AACCAATCAGGCGACAGCCCATCTT TTTT TGAGCCAAACACCACAACCGTCCGTTGGCAAAAAT  
CTTGATCAAAA TAAA AAG CAAA TGCTGATGGAGT TGTGT GAAA ACCTGCC ATTC TTGTTGATGAACCAA  
ATCC AAGACCTC TTTT CAAGAAGCTTGCCAAACAGGCATAGT GAAT ACTGTACC TAAA GAGGAAC GAAT T  
ACAT TGGGAT TGTATAAA TCGACTACAGGATCACAAA GAAT GACTC ATCC ACCC CTGCTCCATCTGCGA  
TCC TTAGCAAAGCTCCTATATTTT CAGGTT TTTT TGCTTGCTCAACAATCAAA TAAA AAGGAGCCTGATT  
CTTT GCTGCAATCC TAAA AACTC TTGGCAAGACAGCTC TTTT TTTT CAAAACAGCAA TAAA ATTC TCG  
GGATTC TC TTTAAA CGACAGTT TTTT CAAAAT ATCC TTAGAACAATACTA ACT TTTT AATACCAAGCGAAG  
TAAGCTCGCGATCAAGAGCTATCTCCTTATCGGCAATTAGTTCTCCGCAAAATACATGCGAACAACGGTA  
TCCA GAAA TTAGGGCTCGATGAAT CTCTC GAAA CCC TTCTAA TAAA AAATATGTGCCATTACGTGCCCGC  
TGGCGC TTTAAA GCAAGAGCACTC TTAACACGGGCATTATT TTTT CCTATAAA CTC CATTGCGCAAAC AC  
CC CTGAAGGCAACCGTTG ATTC CCCTCACCACAAAAAT TTTT TCC TAAA CGCC ACCC TTGGAGAGGAAGC  
ATAGGAAGCGCTCTTCTAGC TAAA CAATGCAAAA ACTC GGGAGTATGTCCC GGTTGATGTGAAGTAATCA  
GCATATGCGA GAAA GAACTAGAGAGGAGCTGTGAACACA ACTC TAA TAAAGG GAAA AAATCGCGATCTAT  
CAAAA AATGTCTCTCCATCAGGACCTCGCCCATAGGTAGGTGGATCC AAAAGAAT GACATCATAAGTC TTT  
CCTCGAC GAATTTT CTCTTCAAGAAG GAAA ACACATCTTCTATAAT CCAAAAA ACCC TTTA TCTT GAA  
AAGCGTTCCCTTCCAGTTTT CAAA GGCCACTTAACAGCTGC TTTA GAAGCATCC ACATGATAAA CTGT  
TGCTCCTTGTGAGCACAGAAA ATAGAAGAAGCTCCAGTATAAGCAAAGAGATTC AAA ACTC TACATGAA  
GGCTTGGCTACAGAAGGTG TAAA TC TTTT CAGA ACCC AGCATGCTCGGG GAAA ATACCTACATGACCAA  
AAG GAGT CAGCTTCAA TAAA CAC GAAA CAGAAT CGATGGTT ATCC ACC ATTC TTTA AGA TTTT TGTGCG  
ATACCGCCATTGCCCTTGTCTCCCATACGAACAAA ACTCAGCAGAAT ACTGCCCCATAAGGAGGGAGAG  
CTC CAAA GCCAAATAGCCGTGGCAGAAGAAC GAAT TAAGCAAAC ATCC TAAA TCGCTCTAG TTTT TTAC  
CGTCCC ACTATCTAACA ACTC GTA ATCCATCA CAAA CTGATCTCTT TTTT GGCATG GAAA CGCATAATT  
GTGTCCACCTGCATT CAAA TCATCATATCAGGCTCCAT ATTC ACGTGAGC ACCC ACCTG TTTA TAACCCA

ATGAGGTGCGCGCTC GAGTCTCCG GAATCAAACCTAACT GAAAAGATGTCCCC TTTAACTC GTGCAATTGT  
CAAACCTGATGCCATCAATAGCAATGAAGCC TTTC TC TAAAATATAAGGCAC TAAA TTAGCTGGAGCCT TA  
AAAAACATATAGGA TTTC TCTATGGCAATAATAGTGCCT ATCC CACAGACATGCCAGAGACAAAATGTC  
CTCCTA TTTC ATCTCCTAATCGAACCGAGCGTTC TAAATTTA CCATGGTTCCCACCGTATAATC CAAAAT  
GGTAGTCCAAGCCATGG TTTC TTCAGTCACATCAAAAAA GAGT AATTC G TACTGTGCG CAAA ACCAGAGTC  
AAACATATGCCATCGACGGAGAAGCT ACTCCCCGGAACCACATCGATCAACTTGCAGACAAAA ACTC CAA  
TCTCCATG GAATCC CCGAGATGGT GAAT AAGATCT ACCCGTGCAGCTTCTT GAAT AATGCCT GAAA ACAT  
AGACAAT TAAA TACC CAAA CTAGGTCGTGACAACAATACTT TTTA GCAATCTT GAAA AACTAGATACAC G  
AAA AAGCCCTCTCC GGAT CTGATCAAGGCAAACAGCGGTTGCTTATAATCAAAAAATAATTAT ACTC CGA  
GACCGCCCGTAGA GAAA ACC TTTC TAAGAAGAGGTTCT TTTC AACACAAGACACAG GGAT TTTATCCAT TA  
AA TAAA AACCGTGGTATCTTGAGCGTCTGCAGATATTAGGCGACT CAAAAA AAAAAATCACCACAAAT  
CACAATCAAG AAT TGTGTTACTAG ATCC CCCAAGCTACCTC TTTC TTTC ATTTTC TGAAGGGCCTATCGTA  
G TAAA CAAGGAT CTAATA CAAAAAT TTTAGGAG GAAT CTCCCATGCTATGCCCAT CAAA TAACCATGGAG  
AGCT TAAA GTTATCGACTCTC GAAA CGCACCAGAGT CAAACGCGAT TAAACGCCGTGCG GAAT GCTTACG  
TTGCAGCCAAAGAT TTTA CAACC CAAAAA CAGTAGAAT TAACTGTACAGGTAT TAAA GCGAGACGGTCTG  
TAT GAAA ACTTCCAAG AAT CAAAGCTCGTCAAT GGAT TAAA AGCAGCTTCCAGCCATACA GAAT TGGAC  
AAGAACAAGTACAAGCAATCGCCTCTAATATCAACAAGATCTTCTTG GAAA ACAAATCGA GAAA TCTC  
TACCAA GAAA TAGGCGAACTAGTAAT GAAA TATC TAAA AAAAGCAGATATGATTGCGTACATTAGGTTC  
GCCTGTG TTTA CAGAAGA TTTAAA GATGTAGGAGAGCTAATGGAAGTCTTATTATCTGCAACACCAGATG  
GT GAAA AACAAACAT GAAA AGGAGAAT TGTATGCCCTAACGGACGAA GAAA TAGCCAAT TTTAAA ACAC  
GTCT TTTAGAAA TGAAGGCTAAGTTGTCTCAT ACTC TAGAAGG GAAT GCTCAAGAGGTCAAAAAACCTAA  
TGAGGCAACAGGCT ATTC TCAGCACCAAGCAGATCAAGGCACAGATACG CAAA ATCGAACTATCAGCCTG  
GAAGTACTACT TAAA GAGTATAAAA CTCTTAGACAAATTGATCGTGC TTTAGAAA AAATTGAAGAAGCCT  
CTTACGGCA CAAA TGATGTAAGTGGAGAAGAAA TTC CGTTGGCAAGATTAATGGCAA TCC CTTACGCTAC  
GATGACTGT GAAA TCACAA GAAA AATTC GAAA AAGCCCTTC TTTC TG GAAA CTAGTTACAATGCCG ACCC  
GTTCTCTCCCAACCTTCCTT ACTC TCCTTCTCCTAGCCTCTATTGATT GGGT CTCAAACCTAGTTGTGTT  
ACTC AAGAGCTGCCAGCTCTCCCTC ACTC CTCAGCT TTTCTTTA TAGCTACGTGTGGGGACATT TTTC T  
TTTC TCATT ATTC CCTCCTTCAATGAAGGAGCAGCC CAAAGACTC CAAACCCAATACAAAATCC CTCTTC  
TTAT TTTC CGCG CAAA CGTAATCC TAGGCCTAGCCTT ATTC TTGA GAAT TAAA TATAAGTC TTTA CATAG  
AAGAACAC GAAT TGC TTTA ACCTTGATCC TCAGTGGAGCTCTAGG GAATGTGGGT GATATCTTACTC CAC  
GGTAAGGTTGTCGACTTCCTT TTTC TTAGCTATT ACTC CTGGCGC TTTC CTTCCTTCAATTTA GCAGATG  
CG TTTA TCTCTATAGGA ACCC TCCTTCTTATTGGTACCTATACTTCAC TAAAGAAA G TAAA AAATGCTT  
TTA AAAAAAATTC TTTC TTTC AAGGAT CTCTCTACCAACAAAAAG GAAAAAAG GGATAATATAGGGTA  
AT TTTC AAGGAAT TTTA GTTTA ATCATATAT TTTA TGAGCGCG TTTC TGCTTT CAAA ACCGC TTTC GA  
TGAC TTTACAAA GTCATACATAGCA CAAAT CAAA ATTC TCTTGCTCG GAGT CAAA TTCACATGCAAATCT  
AAACAAA CACAA TTTA CTC AACTTCTGCGTT TTTC AAGCTATTC TACCATT TTTC AAAAGAAGCCTCGT  
CAAAAAA GAAA ACCAAA GAAA GGTGTTCATCC GT TAAA AGTATTC CAAA CTCCGCAGGAGG GAAT AT  
CGGCATCGGCAACGTTGTTGGGAT AGTCACAGCTGCTAGTGTGGTGGACCTGGAGCTCTCT CAAA GGCA  
AAGAT AGCTGGAATCC TAGGGT CTATAGT TAAA TACTC CGAAGCTATCTAGGTAT TAAATTC CGTCAGT  
CTGATGCCAATAATGTGTATCATGGCGGCCCTATGTTCTTCTTGA TAAAGCCTATAGA ACCC GCATTGT  
TTC CGTTATCGTTGCTGTTCTCCTCTGTAT TTTA TGGGGTAGAGATCTACCAAT TTTC AATTATTGCCAAT  
ACACTGGCCTCTTGCTG GGAT GTCCC TAAATTGATGGCCATTGCTTCTCTCCTCTTCCTGGTTATGTATG  
CTGTGCAAGGAGGCTTGCAGC GGATAG GAAAAATCTGTTCCCTAGT TTTACCC TTCTTCATGTTGGTCTA  
CTGCG GAATGGCTT TTTATAT CAAA ATTC AAGAAA TCCATACTC TTCCCGCGCT ATTC TCTAGTAT TTTC  
CGGTGCGCC TTTA CAGGTCATGGAGCGATCGGAGGACAAA CAGGAT GCACAGTGGCTTCCACT ATTC GTC  
AAGGACTATCTAGAGCAGCTT ATTC AGGAGATATTGGTATT GGG CAAA ATTC CAT TATCC AAAAGT GAAA  
ATCTGCAACAA TCC TCAGACACAAGCGCAGCTTAGTATCGTGC GAGT GATTGTGGACAACCTCGTATGT  
ACGCTAAGTCTTCTTATCGTTCTTGCTTCTG GAGT GTGGCATCGAGCAGG ACTC GAG GGATCAGAAA TTG  
TAGAACAGGCTC TTTC CTCCTACTTCCCTTAC ATTC GTGTATTC CTTCCTCCGCG TTTC TG CAAA CTACAGG  
ATACACCACCATTA TTTC ATAT TTTC CTGTAGG GAAA AAGTGTGC GAATTTTC ATCTGCG GAAA CAAAGGA  
TC TAAA TTC TATACCGTCTATG GAAT TATAGCTCTGCCCG TTTC TGT TTTC TTCCACAGGATACAGCAT  
TACTTGTATGTCTG TTTC GGGAGCTCTATTGCTATGCCTCAA TTTA TTGGGGGTATTC TTAATGC GAAA  
AGAGCTCAT TTTC CCCAAAAAGAGGGCG GAAA ACTC TCGAGG TTTC TGAGTCC ACTC TCTCTTCA TAAAAG

GAGAGAGAGTCA TAAA GCTGTTGATGATCAAAAAGACGTGCCTTATATATGGTCCCT TAAACCC TTGAAA  
ATT TTTAGAAA CATATAGGTGAT CAAA CCCTTG TAAA CGTAATTT TTTCTATTATAGGAAGAGC TTCTCT  
GAAGAGA ACTC TAAA AGCCTTCTTGCTCAAGGACAAA ATTC CTCCAGACTT TTTA AC TTTC AATGTCATA  
TAATGATGGCTTGCAACCAAGA ACTTC TTTC GCCTAGAGGCTTAGA CAAACTCAGCAAAAATTC TCATTC  
TAATCTT ACTC CTACGATAT TTTA TCC ATCAGACCACAATATTGATCTGCAAAG TTTC TCCACTC AC GCG  
C TTTC CGTTGTAAGAAC CAAAAA AAAGCTGGGTACGAAGCTTACATTGTGCGGAGGCTGTATCCGAGACC  
TGTTGTTGAAGACAGAACC AAAAGAT CAAAATATCTCAACCTCTGC TAAACCTGAAGAAGTCAAAACGTT  
ATTC AAAAATTGTATTC TTGTAGGCAAACGATTTTC G CAAAAGCTCAC ATCCG TTTC CCAAACCAAATCATA  
GAGGTCGCTACC TTTA GATCTGGTAGCAACGAAGAAG ACTC CTTAATTACAAAAGATAATC CAAA GGGAT  
CTGCCGAAGAAGACGTATTACGCAGAGACTTCACGATTAACGGCCTTT TTTA TG ACCC TAGCGCAGAAAAT  
TATCATCGACTACACAGGCGGTGTGAGGATTTAAA AAATCGCTATCTCAGA ACTATTGGAGATCC TTTC  
CTTCG TTTC CAAACAAG ATCC TGTGCGCATGCTGCGCCTAT TAAA AAT TTTA TCTCGTTATGCT TTTA CAG  
TAGATCC TAAA ACTC TAGAAGCTCTTCAA GAAT CTCGTACGAACTTGT GAAA AGCTCTCAACCTC GAGT  
C CAAA AGAAA TCATCAAAGT CAAA AGT TCTGGG GAGT CTACCATTTT TTTC CAGCTAGCTTCCGAACAT  
CGCGTCTAGAGAT TTTATTC CCTTACATGGCTAAGGCATTTA GCTTAAGTAAGACTCTGCAAGATCAGA  
C TTTC GCTTGCTTAACAGCATTAGACAC TAAA ATTC A GAAA CGCTCGTTCTGTTCA GAAAGACAC TTTC T  
GCTAGCGATCC TATT ATTC CCTATTGTTAACTTCAATGTGCGGTACAAATATAGTCAATACCCAACGATG  
ACT ATCC CAAAGTATC CAAA ACTAT ATTC GAAA CTT CAAA ACT GAAT TT CAAA CCGACTCATTTA CTAGTT  
GTTCCAAGAAA AATTTTC ATCTTGACA ACTCTGCTATTGCAAATGCAGTACCGGCTGACCCATT GAATGC  
TATGAA GAAAGAAA AAAAATC TTTC TTCAATAGAAGATTGTTACGCCATGCCTACTTCCGAGAAGCTCTTT  
TACTTACTAGAAA TCC GCAG TAAA GTGTATC TAAA AGTAGAGGCTACCTATGGAGAGTGGCT TAAA CATT  
ATGAATTAGCATCG GAAT GACCATTC CTA CAAAAA TTGG GAAA ATTC TTCTCCCCTATCGATTACTACA  
ATGAGTTGTTATG TTTC CCCAAAAAAT TACTCTGTTTATACCTCTAGGACT ATTCGCCAACCTCTTC  
CAAAGCACAGCTT CAAA TGTTC AATGTT TTTA ACTA GAAAGAAA GGGTATTC TGTGTTCCCAAGATTT  
CAAAGTATCTGTCCGGTACCGGCGCCGT TTTC ATGA CAAACCACGGATTTTATTC AAAGTCAGTATCC TAT  
TGCCAAA TTGC ATTC G TTTA ATCTGATTATTTATTTTC CGGAACCT GAATATCGCCTCTCTAAA TCCCTT  
CCTG TTTC GAAA ATAGCTTCTCTACTAGTCTCAGTAGCAACAGCGATCACGGTATCT CAAA CTATTGGAA  
CGCGTTACCTCCATCATATGACGT GGAT GGC ATCC CCAAATATCC TCCA CAAA AAT CTACCAGAAGC GAG  
CAAATCATGGCAGCTGATAGGATGTATC GGAT TGACGATCTTCTCATTGAGATT TTTC ATCC AGTGGTTC  
TATCTC GAATACAAAAACCAATCC GCCCTGCCCGCTCCTT CAAAGAAA GCAAGCCTACTAGGAGGATCTA  
TCTGCCTTCTCTA TTTC CTAAGAACGGG GGAT CTCG TAAACGTGTTATGTTAT GGAT GC GGGT TATTCC  
TTCT TTTA GCAAATCTACGTATCGCTT CACGAGAAGC TTTC CGCAAACCT TTTA GCAATAGCTGC TTTATT  
TCTGCGGGCGAACATAGTGGAGATAC CAAAGGAGG GAATTTAT TAAA AGAAA TGCACGCAAAATACCTG  
ATATTC ATTGC CAAA CGTG GGGGACCGCAAATGCGTGCACAGAAT TTTC ATGCACT TTTC ACTATGGA  
GAAATTT CAGGTTAGC GGATTC TGGGAAGTACT TTTA GCACTACC TAAATTATGGTACCCTATCAGCTT  
CTCTATAGAAA ATTC T GAAAACAAA TCC GCGCACAGTGA CAAA CATTGATTT C CTGATTTTC ATTTCT  
TATTAATAAA AAAAATACGCTCTCAGGATA TAAA G GAAA GATTGTTCACTATGTATGCCCTAGCATATG  
GGCTTGAGACCTT CACG GAAA ACAGT CAAAGAAA AATATCTAGACCTGCT TTTA CTAATACTTCT CAA  
AAACAAA ACTT ATTC CAAAG ATTC AGCTCTGCGTACAGTCTA TTTA GGGC ATCC TC TTTC T GAAA CAATTA  
AAAGCT TTTC TCCCAATC TAAA TTG GAAA GATCAGCTCCATCTTCTACC GATAAA CCTTTC ATTGCAGC  
G TTTC CTGGTAGCCGTGCGCAGCGAT ATCC T GCGTAATCTAACC ATTC AAGTGCAGGCC TTTC AAGCATCC  
TCTCTTGC ATCC ACACACCA TTTA CTGTATCGTCTGCAAATCC GGAATATGACCATCTTATCC TCGAAG  
TGCTTCAACAGAAT CGGTG CAAA CACAGTCATATTGTTCTTCCAG TTTC GTTAT GAATTAATGAGAGA  
ATGTGAT CAAA CCTCGCCAAATGTGGA ACTATCGTCTAGAAA CGGCTCTCAATCTA ACTC CTACGATC  
GTC ACTTGCAGCTCCGACC CAAA GAT ACTTT TTTA GCTAAGTATATC TTTA ATATT ATCC TTCCAGCCT  
ACTC GCTCCCTAATATC ATTC TAGGCAGAACGATT TTTC CT GAATTC ATAGGTGG GAAA AAAAGAT TTTC A  
ATATGAAGATGTTGCTGCTGCTC TAAA C ATTC T GAAA ACATCTCAAGCTCAAGAAA AACAAAAAGACTCT  
TGCAGAGATGTGTATCAAGCAATCAAT GAAT CTGC ATCC TCTAT GAAA GAGTGTG TTTC TCTCATATTCG  
AAA CAGCTTCTAATAGATTATCAAAGACTTATAAA AAATCTT GGAT CGCTAGAAA AGCGC TTTC TGTTT  
ATAGTTCCCGTTCAAACAATGTCTTAAGATG TTTA TAACAAAGGA ACTTAT GAAT C GAGT TATA GAAAT  
CCATGCTCACTACGATCAAAGACAAC TTTC TCAATCTCAAATACAACTTCTTAGTACATCATCC TTAT  
CTTACTC TTATTC CCAAG TTTC TACTAGGAGCTCTAATCGTCTATGCTCCTT ATTC G CAAA CAGAAA TG  
AAT TAGCTA TTTC TGGACATAAA CAAG TAAA GATCGAGATACC TTTA CCAATGATCTTCTCTGCTGCTGA

AGGCACTAATTACATCATCAATCGCAA**ACTC**ATA**ACTC**AGTGA**TTC**TCGTTAC**TAAATAAAG****TTC**ATCA  
GGGGGAGCC**TTC**G**GAAT**CTAGCAGG**GAAA****TTC**CTTCTTAG**GAAA**AA**TTC**TTCTGCGTCC**ATTC**AT**T**  
**TTAAA**CACATTAATATCAATGGT**CAAA**GAGCCG**GAGT**CT**TTC**T**GAATCC**TCTATT**GAATTTA**CTGA**TTT**  
**ACGAAA**ACTTGTGCT**CAAAGAT**CT**GAAA**GCACAGGAG**GAAT****TTTA**CTGC**GAAA**GAGGACATCTCT**TTT**  
**AAA**ACAACCACCACATTGCCTTCCGCAATAATATCACC**AAAGG****GAAT**GGTGGCGTT**ATCC**AGTCCAAG  
GAGATAT**GAAA**GGAGCGT**ATCC****CAAA**TAGATCAACGTGGAGCTATCATC**TTTA**CCAATAACCAAGCTGT  
AACTTCTTCATCAAT**GAAA**CATAGTGGTCTGGAGGAGCAATTAGCGGTGACTTCGCA**GGATCC****GAATT**  
**CTT****TTC**TTAATAACCAACAAATTAC**TTC**GAAGGCAATAGCGCTGTGCATGGAGGTGCTATCTACAATA  
A**GAAT**GGCCTTGTG**GAGT**TCTTAG**GAAA**TGCAGGACCTCTTGCC**TTTAAA**GAGAACAACAATAGCTAA  
CGGGGAGCTATATACACAAGTAA**TTC**AAAGC**GAAT**CAACAAAC**ATCCCC****ATTC****ATTC**TCTCAAAAT  
CATGC**GAAT**AA**GAAA**GGCGGAGCGA**TTTA**CGCGCAATATGTGAAC**TAGAACA****GAAT**CAAGATACT**ATTC**  
GC**CAAAAA**AAAATACCGC**TAAA**GAAGGCGGTGGAGCCATCACCTCTTCTCAATGCTCAATTACTGCTCA  
TAATACCATCACTT**TTC**CGATAATGCTGCCGGAGATCTTGGAGGAGGAGCA**ATTC**TTCTAGAAGG**GAAA**  
AAACCTTCTCTAACCTTGATTGCTCATAGTGGTAATATTGCA**TTTA**GCGGCAATACCATGCTTCATATCA  
CCAAAAAGCTTCCCTAGATCGACACA**ATTC**TATCTTAATCAAAGAAGCTCCCTA**TAAAATCC**AACTTGC  
AGCGAACAAAAACC**ATTC****ATTC****TTTCCAAAATCC**TGTCATGGCATTGTCAGCATCATCTTCCCCTATA  
CAAATCAATGCTCCT**GAGTAT****GAAA**CTCCTTCTTCTCACCTAA**GGTAT**GATCGT**TTC**TCGGT**GCGA**  
**AT**CT**TTTA**GATGATGCTAGGGAAAGATGTTGCAAATAGAACATCGATT**TTTA**ACCA**ACCC**GTTTATCTATA  
TAATGGC**ACCC**TATCTATC**GAAA**ATGGAGCCCATCTGATTGTCCAAAGCTTCAAACAGACCGGAGGACGT  
ATCAG**TTTAT**CTCCA**GGATCC**TCCCTGGCTCTATACACGATGA**ACTC**GTTCTTCCATGGCAACAT**ATCCA**  
GCAAAGA**ACCC**CTA**GAAA**TTAATGG**TTTA**AGC**CAAA**GAGTAGATATCTCTCCTTCTAATCTTCAAGCAGA  
G**ATCC**GTGCCGGCAACGCTCC**TTTA**CGATT**ATCCGGATCC**CCATCT**ATCC**ATG**ATCC**TGAAGGAT**ATTC**  
TAC**GAAA**ATCGGATACTGCAGCATCACCATACCAAATG**GAAA**TCTTGCTCACCTCTGA**TAAA**ACTGTAG  
ATATCTCCAA**TTTA**CTACTG**ATTC**TCTAGTTACGAACAACAATCA**GGATTC**CAAGGAGCCTGGCAT**TT**  
**TAG**CTGGCAGCCAAATACTATA**TAAA**CAATAC**TAAA**CAAAAAATATTAAGAGCTTCTTGGCTCCAACAGGA  
**GAAT**ATGTCCTT**GAATCC**AA**TCC**GAGTGGGGCGTCCGTT**CCTAATTC**CCTATGGAGCACATT**TTTA**CT**TT**  
**TA**CAGACAGCCTCTCATAACTTAGGCGATCATCTATGTAATAATCGATCTCTT**ATTC**CTACTTCATACTT  
CGGAGT**TTTA**ATTGGAGGA**ACTGGAGCA****GAAA**TGCT**ACCCACTC**CTCAGAAGAA**GAAA**GC**TTTA**TATCT  
CG**TTTA**GGAGCTACAGGAACCTCTATCATACGCTTA**ACTC**CCCTCCCTGAC**ACTC**TCTGGAGGAGGCTCAC  
ATATGTTCCGGAG**ATTC**GTTTCGTTGCAGACTTACCAGAACACATCACTT**CAGAAG****GAAT**TGTT**CAGAAT**GT  
CGG**TTTA****ACCC**ATGCTCGGG**ACCC**CCTACTGTCA**ATTCTAC**ATTATGTGCAGCCTTAGATCACAACGGC  
ATGGTCCGCATATGCTCCAAAAAGATCACACCTATGG**GAAA**TGGATAC**ATTC**GGTATGCGAGGAACAT  
TAGGGCCTCTTATAC**ATTC**CTA**GAAT**ATGATCAAAC**TATGCGCGTATTC**TC**ATTC**GCCAACATCGAAGC  
CACAATATCTTGCAAAGAGCT**TTTACT****GAAA**CAGGCTATA**ACCC**AAGAAGTT**TTC**CAAGACAAA**ACTT**  
CT**TAAA**CATCGCC**ATCC**CCATAG**GGAT**TGGTTAT**GAATTC**TGCTTAGG**GAATAGCTCT****CAAA**CTCTACTAG  
GTAAG**GGATCC**ATCGGTT**ACTC**TCGAGATAT**TAAA**CGA**GAAA****ACCCATCCACTC**TTGCTCACCTGGCTAT  
**GAAT**GAT**CAAA**CTTGGACTACCAATGGCTGTT**CAGTTC**CAACCTTGCACACACATTGGCAAATCAATTG  
**ATTC**TTCGCTA**TAAA**GCATGTTCTTATACATCACGGCATATACTATCAACCGTGAAGGGAAGAACCTCT  
CCAATAGCTT**ATCC**TGCCGGAGGCTATGTTGGCTTCTAATATAACCTTGGAGGTGA**ACTATT****TTTAAA**AAC  
CTCTGTATCTTCCTAG**TAAAT**TAGGCAAG**GAAT**ACCTTGCCTAA**TTTA**CT**TTC**TGA**TTTA**TCTAACGCC  
TATC**GAGT**TCGTACAT**ATTC**AA**TAGG****CAAA**TCTTCTAT**GAAA**TGGCTGT**CAGCTACT**GCGGTG**CAAA**CTG  
CTGTCTCCCTCAG**TTC**AGGGT**CAAA**CTTCC**CAGAACC****TAAA****GAAT****TAAATTC**TCTCGCGTAGGAAC  
TTCTTCCCTTACC**ACTTTTACT****GAAA**CAGTTGGAGAAGCTGGGGC**GAAT**ATATCGTCTCTAGTAACGCA  
TC**TTC**ACAAAA**TTTA**CCAAC**ATTC**CTACTACCAATAACA**ACTC**CCACGA**ACTC**AA**ACTC**CTCTAGCT  
CTAACAGAGAGACTGCTTCCG**TTC**TAAGGATAGT**ACTCTACAACA**CGACT**CTGATCC****TAAA**GGTGG  
CGGCGCCT**TTTA**TAACGCG**ACTC**CG**GAGT****CAAA**TCC**TTTA**TGACACGATCAGGAACAGAAGGTTCCTTA  
**ACTC**TGTCTGAGA**TAAA**AATGACTGGTGAAGGCGGTGCTATCTTCTCTCAAGGAGAGCTGCTA**TTTA**CAG  
ATCTGACAGGTCTAACC**ATCC**AAAA**TAACTTATCC**CAGCT**ATCC**GGAGGAGCGATT**CAAAGAGGAT**CTAC  
AATCTCCCTATCAG**GGAT**TAC**TAAA**GCGAC**TTC**TCCTCCA**ACTC**TGCAGAAGTTCTGCTCCTGT**TAAAG**  
**AAA**CCTACAAAACCTGAAGCTCAAACAGCAGGC**GAAA**CGTC**GGGT**TCTAGTAGTTCTAGCG**GAAA**TG**ATT**  
**CGGCGTCTTCC**TCCAGTTCCAG**TAAA**GCTGA**ACCC**GCAGCAGCTAATCTTCAAAGT**CAC****TTTACAAA**TGC  
TACAGCT**ACTC**CTGCTGCTCAAACCGATAC**GAAA**CATCA**ACTC**CCCTCTATAAGCCA**GGAT**CTGGGGGA  
GCTATCTATGC**TAAA**GCGACCTTACTATCGCAG**ACTC**TCAAAAGTACT**ATTC**TCAA**TAAATAAA**GCTA

CTAAA GATGGAGGAGCGATC CAAA CTGAGAAA GATG TTTCTTTC GAGAAT ATTACATCAT TAAA AGTACA  
AACTAACGGTGCTGAA GAAAAGGGAGGAGCTATCTATGC TAAA GGTGACCTCTCA ATTCAATCTTC TAAA  
CAGAGT CTT TTTAATTC TAACTACAG TAAA CAAGGTGGTGGGGCTCTATATGTTGAAG GAAA TA TAAACT  
TCCAAGATCTTGAA GAAATTC GCATTAAGTACAA TAAA GCTGGAACGTTCAAAACAAAAAATCAC TTT  
ACCTTCAAAGCTCAAGCATCTGCAG GAAATGCAGATGCTTGGGCCTCTTCCTCTCCTCAATCTAGTTCT  
GGAGCAACTACAGTCTCCG ACTCAGGAG ACTC TAGCTCTGGCTCAA ACTCGGAT ACCTCAAAAACAGTTC  
CAGTCACAGC TAAA GCGGTGGGC TTTA TACTGATAA GAATC TTTTC GATTACTAACATCACAG GAAT TAT  
C GAAA TTGCAAATAACAAAGCGACAGATGTTGGAGGTGGTGTCTACG TAAAAGGA ACCCTTACTTG TAAA  
AACTC TCACCGTCTACAATT CAAAAA AACTC TTCCGA TAAA CAAGGTGGAG GAAT CTACGGAGAAGACA  
ACATC ACCCTATCTAA CAAAACAGGGAAG ACTC TATTC CAAGA GAAT ACTGCCAAAAAGAGGGCGGTGG  
ACTC TTCA TAAA AGGTACAGA TAAA GCTCTTACAATGACAGGACT GGATAG TTTTC TG TTTA ATTAATAAC  
ACATCA GAAAAACATGGTGGTGGAGCC CAAA TTACCAA GAAA TCTCTCAGACTTACACCTCTGATGTGG  
AAA CAATTC CAG GAAT CACGCCTGTACATGGT GAAA CAGTCATTACTGGCAAT TAA TCTACAGGAGGTAA  
TGGTGGAGGCGTGTGTACAAAACGCTTTCCTTATCTAACCTTCAAAGCAT TTTCT TAT ATCCGG GAATTC T  
GCAGCA GAAAATGGTGGTGGAGCCTACACATGCCAGATAGCTTCCCAACGGC GGAT ACTGCAGAACAGC  
CCGCAGCAGCTTCTGCCGCGACATCT ACTCCC GAGT CTG ACCC AGTGGCCTCAACTGCTCTAAGCACACC  
TTCATCTTCTACCGTCTCTTCATTAACCTTACTAGCAGCCTCTTCACAAGCCTCTCCTGCAACCTCTAAT  
GAGAAA ACTCAAG ATCC TAATGCTGATACAGACTTATTGATCGATTATGTAGTTGATACGACTATCAGCA  
AAAACACTGCTAA GAAA GCGGTG GAATCTATGC TAAA AAAGCCAAGATGTCCCGCATAGACCAACT GAA  
TATCTCTGAGAACTC CGCTACAGAGATAGGTGGAGGTATCTGCTG TAAAAAATC TTTAAA ACTAGATGCT  
CTAGTCTCCTTATCTGTAACAGAGAACC TTGTTGG GAAA GAAGGTGGAGGCTTACATGC TAAA ACTG TAA  
ATA TTTTC TAATCT GAAA TCAGGCTTCTC TTTTC TCGAACAACAAAGCAA ACTC CTC ATCCACAG GAGT CGC  
AACAAACAGCTTCAGCACCTGCTGCAGCTGCTGCTTCCCTACAAGCAGCCGCAGCAGCCGCACCATCATCT  
CCAGCAACACCAACTT ATTCAGGTGTAGTAGGAGGAGCTATCTATGGAGAACAGTTAC ATTC TCTCAAT  
GTAGCGGGACTTGTGAGTCTCTGGAACCAAGCTATCGATAACA ATCCCTCCAATCATCGTTGAACGT  
ACAAGGAGGAGCCATCTATGCCAAAACCTC CAAA TCTATTAGATCTTCCGATGCTGGAACCTCCTATAT T  
TTCTCGGGGAACAGTGTCTCCACTGG GAAATCTCAAACAACAGGGCAAATAGCGGGAGGAGCGATCT ACT  
CCCC TACTGTTACATT GAAT TGTCTGCGAC ATTC TCTAACAATACAGCCTCTATGGCTACACCGAAGAC  
TTCTTC ATCCTCAG GAAATTC TAT TAAA GATACCATTTGGAGGAGCCATTGCAGGGACAGCCATT ACCCTA  
TCTGGAGTCTCTCGAT TTTTCAGGGAATACGGCTGA TTTAAGGAGCTGCAATAGGAACTC TAGCTAATGCAA  
ATACACCCAGAGCAACTTAGCGGAT CTCAAATAGCATTACAGAAA AAATTAC TTTAAA AAACAGTCTCT TT  
TATT CAAAAAGAAA CCAAGCTAA TAAA CGTGGAGCGA TTTA CTC TCCTAGCG TTTTC CAT TAAA GGAAT  
AATATTACCTTCAATCAAATAC ATCCACTCATGATGGAAGCGCTATCTAC TTTA CAAAAGATGCTAAGA  
TT GAGT TTTAGGAT CTGTTCTTT TTTA CAGGAAATAAA GTTACAGCTACACAAGCTAGTTCTGCAACATC  
TGGACAAAATACAAATACTGCCAACTATGGGGCAGCTATC CAAA GAG ATCCAGGAACC ACTCAATCGCCT  
CAAACAGATGCCAT TTTA ACCC TTCTGCTTCTTCTG GAAA CATTACT TTTA GCAACAACAG TTTA CAGA  
ATAACCAAGGTGGT ACTC CCGCTAGCAAGT CAAA TAGTATTGCA GGAT ACGTCAA ACTC CTC TTTA CAAGC  
CAC TAAA GGAAGACTATTAGCTT TTTTC GATTGTGTGCACACCTCTACCAAAAAAACAGGTTCAACACAA  
AACG TTTAT GAAA CTTTAGATATTA TAAAAAAGAGAACAGTAAGCCATATACAGGAACTATTGTGTCT  
CTTCT GAAT TACAT GAAAACAAATCTTAC ATCC CACA GAAT GCAATCC TTCACAACGGAAC TTTA GTTCT  
TAAA GAGAAAACAGA ACTC CACGTAGTCTCT CAAA AGCAGAAA GAAGGGTC TAAA TTAATTATGGA ACCC  
GGAGCTGTGTTATCTAACAAAACATAGCTAACGGAGCTCTAGCTATCAAT GGGT TAACGATTGATC TTT  
CCAGTATGGG ACTC CTCAAGCAGGG GAAATCTTCTCTCCTCCGA AT TACGTATCGTTGCCACGACCTC  
TAGTGC ATCCGGAAGAAGCGGGGT CAGCAGGAGT ATACCAACAAATCC TAAA GGA TTTCTGCAGCAGCG  
CCTTCAGGTTCTGCCGCAACT ACTC CAACTATGAGCGAGAACAAAGT TTTTC TAAACAGGAGACCTTACT TT  
TAATAGATCC TAATG GAAA CT TTTA TCAAACCC TATGTTAGGAAGCGATCTAGATGTACCACTAATTA  
GCTTCCGACTAACACAAGTGACGTCCAAGTCTATGA TTTAAC TTTA TCTGG GGAT CT TTTCCCTCAGAAA  
GGGTACATGGGAACCTGGACAT TAAA TTCTAATCC ACAACAGG GAAA CTTCAAGCCAGATGGAC ATTCG  
ATACCTATCGTCGCT GGGTATACATACCTAGGGAT AATCATT TTTA TGCGAACTC TATCTTAGGCTCCCA  
AAACTC AATGATTGTGTGAAGCAAGGGCTTATCAACAACATGTT GAATAATGCCCGCTTCGATGATATC  
GCTTACAATAACTTCT GGGTTTC AG GAGTAGGAAC TTTCTTAGCTCAACAAGGA ACTC CTC TTTTC CGAAG  
AATTC AGTTACTACAGCCGCGGAAC TTCAGTTGCCATCGATGCCAAACCTAGACAAGAT TTTATCC TAGG  
AGCTGCA TTTA GTAAGATGGTGGG GAAA ACCAAAGCCATCAAAAAAATGCATAATTACTTCCATAAGGGC

TCTGAGTACTCTTACCAAGCTTCTGTCTATGGAGGTAATTCCTGTAATTCCTTGCTCAATAAGCAACATG  
GTTGGGCACTTCCATTCCTAATACAAGGAGTCGTGTCCTATGGACATATAAAATCATGATACAACAATACT  
TTACCCCTTCTATCCATGAAAGAAATAAAGGAGATTGGGAAGATTAGGATGGTTAGCGGATCTTCGTATC  
TCTATGGATCTTAAAGAACCTTCTAAAGATTCCTTAAACGGATCACTGTCTATGGGGAACCTCGAGTATT  
CCAGCATTCGCCAGAAACAGTTCACAGAAATCGATTACGATCCAAGACACTTCGATGATTGTGCTTACAG  
AAAATCTGTGCTTCCCTGTGGATGCGCTGTGCAAGGAGCTATCATGAACTGTAATATTCCTTATGTATAAT  
AAGCTTGCATTAGCTACATGCCTTCTATCTACAATAATCCGTCTGTAAATATATCGGGTATTGTCTT  
CGAATGAAGCTGGTCAAGTTATCTGCGGAGTGCCAAC TAGAACCTCTGCTAGAGCAGAATACAGTACTCA  
ACTATATCTTGGTCCCTTCTGGACTCTCTACGAAACTATACTATCGATGTAGGCATGTATACGCTATCG  
CAAATGACTAGCTGCGGTGCTCGCATGATCTTCTAATTCCTTCAAAACCAGCCTCTTCAAAGGCTGGCC  
TTACGATCTCTTAATACAAGAAACCTCTTACATATCTCTTAGGCCTTCAAGGCTTATAGAAAC  
TTGATTTTTTTTCAATTTATGATCTATCAATACCTATCATCGTAGGTTGTTCAATTAGGTTATTTAAAT  
ATGAAATTCCTGTGCTACTGCTGTAATACTGCAGTACTCTCCTCCGTTACTGAGGCGAGCTCGATCC  
AAGATCAAAATAAGAAATACCGACTGCAATGTTAGCAAAGTAGGATATTCAACTTCTCAAGCAATTTACTGA  
TATGATGCTAGCAGACAACACAGAGTATCGAGCTGCTGATAGTGTATTCATTCATGACTTTTCGACATCT  
TCCGGATTACCTAGAAACATCTTAGTAGTAGTAGTGAAGCTTCTCCAACGACAGAAGGAGTGTCTTCAT  
CTTCATCTGGAGAAAATACTGAGAATTCACAAGATTCAGCTCCCTCTTCTGGAGAACTGATAAGAAAC  
AGAAGAAGAACTAGACAATGGCGAATCAATTTATGCTAGAGAGAACTAACTATCTCAGAATCTCAGGAC  
TCTCTCTAATCCAAGCATAGAACTCCATGACAATAGTTTTCCTTCGGAGAAGGTGAAGTTATCTCAAA  
ATCACAAGGTTGCCCTCAAAAACGGAGGAGCTATTTATGAGAGAAAGAGGTAGTCTCAAAAAACATAAA  
ATCTCTACTAGTAGAAGTAAATATCTCGGTGCAAGAAAGGGGTAGCGTCTATGCAAAGAACGAGTATCT  
TTAGAAAATGTTACCGAAGCAACCTTCTCCTCCAATGGTGGGGAACAAGGTGGTGGTGAATCTATTCAG  
AACAAGATATGTTAATCAGTGATTGCAACAATGTACAATTC CAAGGAATGCTGCAGGAGCAACAGCAGT  
AAAACAATGTCTGGATGAAGAAATGATCGTATTGCTCACAGAATGCGTTGATAGCTTATCCGAAGATACA  
CTGGATAGCACTCCAGAAACCGAACAGACTAAGTCAAATGAAATCAAGATGGTTCTGTCTGAAACAAAG  
ATACACAAGTATCAGAATCACCAGAATCAACTCTAGCCCCGACGATGTTTTAGTAAAGGTGGTGGTAT  
CTATACAAGAAAATCTCAAAACCATCACTGGAATTACAGGGACTATAGATCAAAATCAGTAACATAGCTACC  
GATTCGAGGACAGGTGTATTCATTAAGAAAACCTGTCTTGCACCAACACGAATAGCCTACAGTTCAAAA  
AAAACCTCGGCAGGTCAACATGGAGGAGGAGCCTACGTTACTCAACCATGTCTGTACTAATACAACCTAG  
TGAAAGTATAACTACTCCCCCTCTCGTAGGAGAAGTGATTTCTCTGAAAATACAGCTAAAGGGCAGGTT  
GGTGGTATCTGCACTAACAACTTTCTTTATCTAAATTTAAACCGGTGACTCTCACAAAACTCTGCAA  
AGGAGTCTGGAGGAGCTATTTTACAGATCTAGCGTCTATAACCAACAGATACCCAGAGTCTTCTAC  
CCCTCTTCTCCTCGCCTGCAAGCACTCCGAAGTAGTTGCTTCTGCTAAATATAATCGATTCCAAACC  
TCTACGGCAGAACCAGCCCTTCTCTAACAGAGGCTGAGTCTGATCAAACGGATCAAACAGAACTT  
CTGATACTAATAGCGATATAGACGTGTCGATTGAGAACATCAAAATGTCGCTATCAATCAAAACACTT  
TGCAAA AAAGGAGGGGCTATTTACGGAAAAAAGCTAAACTTTCCCGTATTAACAATCTTGAACTTTCA  
GGGAATTCATCCAGGATGTAGGAGGAGGTCTCTGTTTAACTGAAACCGTAGAAATAATGCAATGGAT  
CGCTCTTATCCCACTATAACTCTGCTGCTAAAGAAGTGGGTATTCATTCTAAACGGTTACTCTATC  
TAACCTCAAGTCTACCTTCACTCAAAACAGATAACACTGTAAAGCAATAGTAGAAAGCACTCTGAAGCT  
CCAGAAGAGATTCCTCCAGTAGAAGGAGAAGAGTCTACAGCAACAATAATCCGAATTCATAACAGAAG  
GAAGTTCGGCTAACACTAACCTTGAAAGGATCTCAAGGGGATACTGCTGATACAGGGACTGGTGTGTTAA  
CAATGAGTCTCAAGACACATCAGATACTGAAACGCTGAATCTGGAGAACAACACTACAAGATTCATACAA  
TCTAATGAAGAAAATACCCCTTCCAATAGTAGTATTGATCAATCTAACGAAACACAGACGAATCATCTG  
ATAGCCACACTGAGGAAATAACTGACGAGAGTGTCTCATCGTCTCTTAAAGTGGATCATCTACTCTCA  
AGATGGAGGAGCAGCTTCTTTCAGGGGCTCCCTCAGGAGATCAATCTATCTCTGCAAACGCTTGTTTACT  
AAAAGCTATGCTGCGAGTACTGATAGCTCCCCTGTATCTAATTCCTCAGGTTTACAGCTTACTGCATCTT  
CTGATAATCCAGACTCTTCCCTCATCTGGAGATAGCGCTGGAGACTCTGAAGGACCGACTGAGCCAGAAGC  
TGGTCTTACAACAAGAACTCTTCTAATAGGAGGAGGTGCTATCTATGGAAGAACTGTAAAGATTGAG  
AACTTCTCTGGCCAAGGAATATTTCTGAAAACAAAGCTATCGATAACACCACAGAAGGCTCCTCTTCCA  
AATCTAACGTCCTCGGAGGTGCGGTCATGCTAAACATTTTATCTCGATAGCGGGAGCTCTAGACG  
AACTGTCACCTTCTCCGGGAATACTGTCTTCTCAATCTACAACAGGTCAGGTTGCTGGAGGAGCTATC  
TACTCTCCTACTGTAACCATTGCTACTCTGTAGTATTTCTTAAACTCTGCAACAACAATGCTAATA  
ACGCTACAGATACTCAGAGAAAGACACCATAAGAGGAGCTATCGGAGCTACTTCTGCTGTTCTCTATC



AGGAGGGGCTCATTTCTTAGAAAACGTTGCTGACCTCGGATCTGCTATTGGGTGGTGCCAGACACACAA  
AATACA GAAACAGT GAAATTAGAGTCTGGCTCCTACTAC CAAAAA AAAATAAA GC TTTAAAACGAGCTA  
CTATTTACGCACCTGTCGTTTC CAT TAAAGCCTATACTGCGACA TTTAACCAAAACAGATCTCTAGAAGA  
AGGAAGCGCGATTTAC TTTACAAAAGAAGCATCTATT GAGTCTTTAGGCTCTGTTCTCTTCACAG GAAAC  
TTAGTA ACCCAACGCTAAGCACAAC TACAGAAGGCACACCAGCCACAACCTCAGGAGATGTAACAAAAT  
ATGGTGCTGCTATC CAAA GACAAATAGCAAGCTCAAAC GGATCTCAGAC GGATAACCTTCCCCT GAAACT  
CATTGCTTCAGGAG GAAATA CAAATTTCC GAAA CAAT GAATACCGTCCTACTTCTTCTGATACCGGAACC  
TCTACTTTCTGTAGTATTGCGGGAGATGT TAAA TTAACCATGCAAGCTGCAAAAGG GAAAACGATCAG TT  
TCCAAAATGCAATCC GGACCTCTACTAA GAAA ACAGGTACACAGGCAACTGCCTACGAT ACTCTCGATAT  
TAATAAA TCTGAGGATTCAGAAA CTG TAAACTCTGCG TTTA CAGGAACGATTC TGTTCCTCT GAATTA  
CAT GAAA TAAATCC TATATTC CACAAAACGTAGTTCTACACAGT GGATCTCTTGTATTGAAGCCAATA  
CCGAGCTTCATGTCA TTTCT CAAA AGCA GAAA GAAGGCTCTTCTCTCGTTATGACACCT GGATCTGTTCT  
TTC GAACCAGACTGTTGCTGATGGAGC CAAAGTCA TAAA TAACATGACCATTGA TTTATCCAGCGTAGAG  
AAAAATGGTATTGCTGAAG GAAA TATC TTTACTCTCCA GAAT TGA GAATCATAGACACTACTACAAGTG  
GAAGCGGTGGA ACCCATCTACAGATAGT GAAA GTAACCAGAAT AGTGATGATACCAAGGAGCAAAATAA  
TAATGACGCCTC GAAT CAAGGAGAAA GCGC GAATGGATCGTCTTCTCCTGCAGTAGCTGCTGCACACACA  
TCTCGTACAAGAAA CAAA CCGCTGCAGCTACAGCCACACCTACGACAACACCAACGGCTACAAC TACAA  
CAAGCAACCAAGTAATCC TAGGAGGA GAAATCAA ACTCATCGATCC TAATGGGACCTTCTTCCAGA ACCC  
TGCATTAAG ATCC GACCAACAAATCTCCTTGTAGTGTCCCTACAG ACTCATCAAAAATGCAAGCTCAG  
AAA ATAGTACTGAC GGGT GATATTGCTCCTCAGAAA GGATATACAGGAAC ACTCACTCT GGATCC TGATC  
AACTACAAAATGGAACGATCTCAGCGCTCTG GAAA CAAA ACTCTTATAGACAATGGGCTTATGTACCTAG  
AGACAATCATTTTC TATGCGA ACTCGATTCTGGGATCTCAAATGTCAATGGTCACAGTCAAACAAGGCTTG  
CTCAACGA TAAAAT GAATCTAGCTCGC CAAAATGAAGTTAGCTATAACAACCTGT GGATATCAGGACTAG  
GAACGATGCTATCGCAAGTAGGAACACCTACTTCTGAA GAATTC ACTTATTACAGCAGAGGAGCTTCTGT  
TGCCTTAGATGC TAAA CCAGCCATGATGTGATTGTTGGAGCTGCA TTTAGTAAGATGATCGG GAAAACA  
AAATCC TT GAAAAGAGAGAATAACTAC ACTCACAAA GGATCCGAATATTC TTACCAAGCATCGGTATACG  
GAGGCAAACCATTC CAC CAAA TAATCAA TAAA AAAACG GAAA AATCGCTACCGCTATTGTTACAAG GAGT  
CATCTCTTACGGATATATCAAACATGATACAGTGA CTCACTATCCAACGATCC GTGAAC GAAA CCAAGGA  
GAATGGGAAGACTTA GGATGGCTGACAGCTCTCCGTGTCTCCTCTGTCTTAAGA ACTCTCTGCACAAGGGG  
ATAC TAAA CGTATCACTG TTTA CGGAGAATTG GAATACTCCAGTATCCGTCA GAAA CAATTCACAGAAA  
AGAATACGATCC TCGTTACTTCGACA ACTGCACCTATA GAAA CTTAGCAATTC CTATGGGGTTAGCATTC  
GAAGGAGAGCTCTCTGTAACGATAT CAAAATGTACAACAGATTC TCTGTAGCATACATGCCATCAATCT  
ATC GAAA TTC TCCAACATGCAAATACCAAGTGCTCTCTCAGGAGAAGGCGGA GAAA TTA CAAA TGAGT  
ACCGACAAGAAA CTCAGCTCGCGGA GAATACAGCAGCAGCTGT ACCCGGGACC CAAA TGGACTCTGTAT  
GGATCC TACACGATAGAAGCAGACGCACATACACTAGCTCATATGATGA ACTGCGGTGCTCGTATGAT AT  
TCTAAAATAAATATCC TG GAAA GGCAGCTCTCGCAAGGGCTGCCTTCTAG GAATCC CTGCCTCCA GAAAAC  
AACTCTTGTTCCTCAC TAAA AAAATCACAACAGAAT CAAAACAAAAAAGACACACTTGCAGAGGTGAGGG  
CCACGCGAGCAAATGTGT CAGACGGAGAGAGAG GGATTC GAACCC TCGGTACGCGTTAACGCACACACGC  
TTTC CAAGCGTGCTCCTTAAGCC ACTCGGACATCTCTCCAA GAAA ACAAACTACT ACTCTCCAAACA ACT  
CGGTATCGCCGGCAAAAAGACAGTAGAAA GAAC ATTC TTAGTTT TTTAAGAT TTTA TCTCCAGCTTTT  
TCGTACAATT CAAA CT TTTCTTTAAA AAAGTGTCCCTC ACCCGT TTTCTAAA GCTTCTCTGCTCTGAA  
CCC CATATTAC TAAA AAA TTTA TATGT GAATGA TTTAACGCGA TTTCC TAAA GAATAAAATTG CAAA GA  
AGACAAGCCATTGAACAAAATT ACTCAACAATA GAAT AATGGTTCGTTGTTAATAT TTTAAGATAATATG  
CG TTTACTCTT TTTACTCCTCT TTTCCAAAGGGATCACTTGTTCCTATGGAGACGAGG TTTCTACTC GCA  
AGCAGAT CAAAGT CAGCATTGTCCCTA TAAATTTCTTGTGGAACAAATCGCGGG GGATACCTGTCAGGT  
GTTCTCTATTGTTAT GGATAACCATG ACCCTCATAACTATGAGC TTTCCGCC TAAA TATATAGAAAAGATC  
CGCCAGGTTGAAC CAAA G TTTA GAAT TGGTGAG GGA CAAAAA AAAGTGTGAGAGAATTA TTTCTGTGCA  
AGCAAGTAGATCTAGCAGCAAATATCGA TAAA ATTACAATGGGGCCTGCTGCCAGCGT TTTCTTAGT CA  
AAATACCCACACCTGGTTAAGTCC TAAA AACC TAAA AATTC AAATCC AGGCCATTACAGAAGC TTTA GTG  
GAGACCGCCCTGAACAC GAAA CTC TGTACCG TAAA AACTGTTCTCTATTACAGTCTCAACTAGATCT CA  
AAGAT CAAAAGA TTTCTTCTATTG TTTCTAGTACATCACAACGCAATGTTCTAGTT ACCCACGGAGCT CA  
AACTTA TTTCTGTAGAGATTACGGC TTTA TACAACATACTATCGAGCGAGCTAACC ACTCAGAGT TATCT  
CC TAAA GATGTTGTTCTGTGTAGAGCGAACC ATTC GTGATCACAACCTTGC ACTCTGTAAT CAAA CTCAAGC

ATGCGGGGAAA CGTAGTAGCGCCGCCTTAGTACGGAAGTTTAATATGACGCCTATTC TATTGGATCCCTA  
TGCTGAAGATGTCTTCAATAA TTTA CTAGCTATCGCAACGGCT CAAA CAAATCTATGACAAAACAAATGC  
TATTAGA GAAT GTGTCCTTCCGCTATGG GAAA ACCGGTCCCCTAATTGTTGACCACGTCTCCTGCGAAGT  
CTATTC TGGGGA TTTT ATTGGAAT TATTGGGCCAATGGAGGGG GAAA AACA ACTC TC ACCCACTCATG  
CTGAGATTATTACAACCGGTGTGTGGAAGCATCTCTACCTATTC TGTACAAGATCATCGCCCTCTATCCA  
TAGGTT GGGT TCCCCAACATT TTTT CTATGATGCAGCA TTTT CTATCACTG TAAA GAAA ACTGTTCTGTG  
TGGAAGGTTGGCGACACTGCCTTGGTATGGACGTTATACACAAGAAGATCATGAAGCTGTGAAGAAGCC  
CTTCTTACC GTT GATCTGATAGATTA TAAA GACTC TTGCT TTTT CCA CAAA TCAGGAGGCCAAA TTTT AAC  
GTGTTCTCCTAGCTAGAGC CAAA GCTGCGCGTCT GAATTC CT CAAA TTAGATGAGCCACAGCCAATAT  
CG ACCC CGTCAATCAACAAAAAATCTTACAGATTC TTTT CGCTCT GAATAAA CACTGCACT ATCC TCATG  
ATCACTCATGATCTGCACCACACAGCAGGTTG TTTT AATC GAGT CTT TTTT CAT GAA TAAA AACTAACAA  
C TTTA GCAGACACC ACTACAA TTTT A GAAAGATTC TGCTGCAACACT CAAA GGAGATGCCCATGATCTCT  
ATTC CTGTTC CAAA TTCCCGCCTCTTCTATTC CCTTCGCTGCTGGCGGC TTTT GGCGCCTCCATTGCTG  
CAG GAAT CGTAGGCTCTTATATTGTAGT GAAA CGCATTGTGTGCGATTAGTGGAAAGCATAGCAC ATTC CAT  
TC TAGGAG GAGT TGGTATCGCCCTATGGCTTCAATACCAATTTTA ATCTCCCTAT ATCC CCACTACACGGG  
GCTATTGCTAGTGTCTATCTTCGTAGCGATCTGTATTGG GAAT GTCCATCT TAAA TACCATGAACGCGAAG  
ACTC CATCA TTTT TATGATCTGGTCCATTGGTATGGCTATAGGCATTATATGTATATCTAAGCTCCCTTC  
C TTTA ACTCAGAGCTCTCTGAT TTTT TT CAAA GCAATATCTTAT GGGT C ACCC CACAAGATC TTTATTTT  
CTTGGGATCC TAGATCTG TTTA TCGTTGCTACCGT ATCCA CAAA TCACACACG ATTC TTAGCCCTATGCT  
TCGATGA GAAA TACATGGCGTT GAAT CATTACTC CA TAAA AACTTGGTACCTATTGCTGCTTATCTTAA  
AGCAATTACGACTGTTGTTCTTATGTATGTCATGG GAGT TATTC TAATGTTGAGCATGTTAGTCC TCCCA  
GTATCAATAGCCTGTCG TTTT TCC TACAAAATGAGCCACATCA TTTA CATCGCATCTATCT TAAA TATCG  
TCTGCTC ATTC CTAG GAAT TATGCTTGCTTATCTCCTAGACTTGCCAGTTGGGCCGTGTCATAGCG ATTC T  
CATGGGAGGAGCTT ACTCACTGAG TTTACTC TTGAACAGATCATACAATGCATCT ACCC TTCTCCTGTC  
AGCCCT GAAAGCAAAA TAAATTC TTGATCAGGGAAC TGCTG TTTA AGAAGAGCTACAGTTCTTCGCGCT  
CATCAGGCAGTAGCTGATCGATCTTA TTTAAA GCGATGACCATGTC TTTATCC TTTAGCTCTTC CAAA TA  
AGCCAAGAGCTCCCCATTAAGAT TTTA AGATCTTGTTC GGGT GAGT GTCTTTT TATTCCAGAGATATCG  
ATTAC GAAT AACAGTAATCGCGTACGTTCAATATGCCGAAG GAAA TCCAATCC CAATCCCCGGT CAAACG  
ACGCTCCTTCAATAATTC CTGGAAT ATCTGCCATGATCCAAGTTT CAAA ATAGAGC ATTC CTCTTGATG  
AACCAA ACCCAATGAAGGATGTAGCGTGG TAAA CGGATAGGCACCGAC TTTT ACTTCTGTACGTGCAAGA  
GTGT TAAA TAAGGTTGATTTA CCAGCGTTAGGGAATCCAACGAGACCGATATCAGCTATTAA CAAA AGT  
CCAGTTCAACCAAGC GAATTTT TCCAGG TTTA CCTG GAGTAGCT CAAA TTGGAGCTCGGTTAGTCGATGT  
TTTAAAGAAAAC ATTC CCCTTACCTCCTCTGCCTCCCTGACAGACAACAATACGTTACC ATCC TTGGT G  
AAA TCGTGTATCAATTC TCCAGTGGCTGC ATCC CGTAAGAGAGT CCCCTCAGGAAT TTTAATACTAAGT  
CTTTA CCG TTTT TTCTGTACGATTATTACTAGCACC GGCTTGCCCATCAGC TTTAAG GAAA CGAAG  
ATTACGGT ATTC TTCAAAT GAATACAT ATTC GTCAC TG TTTT GATAA GAATAGAGCCCC ATTC CCCCCA  
TTACCGCGTAGGGGCTCC CAAA GGGAGATA TTTT TCT TTTT TCCAAGCTACAACACCATTACCGCT TT  
TC CCGCGCGCA ACTC TAATGTAA CAAA ATCAACAAACATGACTC GTCCTGGAACAAACAAAAAAGCCC  
TATT TTTA CGCGTAGGCAAAAACAGAGCTTGAACAAACT GAAT TA TAAATAAA AATGAAC TAAGCTTGTG  
GGAT AACAGAAA CGTAAGTACGATCTGTTTT TTTT ATTACAACGATACC ATCC GCTAATGCAATAACGT  
ATCGTC TTTT CCCC TACCAACG TTTA CTGCAGGATGCCA CAAA GTTCTCGTTGTCTAACC AAAATGCTT  
CCAGTAGAAACTC TCTGCCCTGCGCCAAC TTTT AACCAAGACGC CAAAATTC GAAT CGCGACCGTTAC  
GGCTTGCTCCCTGACC TTTT TTATGTGCCATGACTC AAAAATCC TTTA TGTTCCTACAATTTA CATAAC  
CAAATCGTAATCTTC ACCCGAAGGTAAT CAAA ACGATGGCCGAT TTTT TTGTGGTA ATTC TTACGTTT C  
AAA TACTTGTAAAGCCACAACCT TTTT TCCGCGAAC GAAAGAAA CTAATTC TCC TTTT ACTACAGCGTTG  
CAACTGTTGGAGCACC AACGGAAGCTT TTTT TCCGTCAAAG TAAA TAATACATCTT GAAA AAGGACTTC  
CAAA TTCTCTTCA GAAATTC ATCC AACAGTTGACGTCTATAACGTCACC CAAA CGAACCTGGTATTGC  
TTA TTTT CAGTCT GAAT TACAGCGTAAGGCTCCATCA ATTC TTTT CCTA TAAA CTTT ACTTGTG TAAACT  
CTCC ATTC TAGAAGGAAGCGCCTGACTTGGCCGGAGAGCCCTGT TAGCGCTTAAGGACACACC ATCC CG  
AAGCGAACAAACAAATATACTACTTCCACTAT ATTC GAAAAGACTTGTCCCTTTT TTTCTTA CAAA GGAC  
ATGAGCAAACAACACAAGCGGCTTGTAA GAAA TCTTCTA ACTC T CAAA CGCAAATGT GAAA TCTGT CACA  
AAAAA TTTAGAGAGT TCTCCGTCAA ACTCTC TAAA CGCCATTAGCGGACAT ACCC GCAT ACTC ATGGG  
ATGGCCAGAGCCG GGAT CGAACC GACGACAAA GGAT CTTAGTCTCTGCTCTACCAGCTGAGCTATCT

AGCCATACACGGGGCTATTTTGA GAAATACCCGCTTTAAATCAATGATAATTC TTAACATGCACCTTT  
CCAAAAA CTCGTTTAAA AATTCCTCGTGAGAAA ACCCTCTTCTATAGACCGTTCCAAAAACGCATTAC  
AAGTTATAGAGGATTTAGCTATAGTTGCGCCTAGGATTC CAAGAGAGCGGGAATTC CCCAGCCAAAGGAG  
CTTGTTTAT GAAA AAGCATTTTA TTACCGGCCTAGTTATTC TTCTCCC TTTA GCGATTACCATTGCAGT  
CGTAGGGATGATTATGAATTTTC TTACACAACCC TTCGTTGGCATGGTATCCGATGTGTTC GAAA AATTT  
AGTTTC TATACCAAATACCGAGCPTTC CTTAGACTTGGTCTACAAATGTACTTCTATTCGGACTTTTCT  
TTACCACAGTTCTCCTAGGCTTCTTGCTCGCCTTATGATTTTC AAATC CAAA TTGTCCGTGTACGACAA  
AATCC TGACAGAATCC CAATCATCAAACAGTGTATAAGGCTGCTCAACAGGTCATGACAACAATC CAA  
AGGTCTCAATCAGGATCC TTTAAA CAAGTGGTTATGGTGCC TTTTC CTAATAGGGAGGTCTTATGTATTG  
GTCTGGTGGCCGGAGAAGCTCCAACCACATGCTCACA GGATGCTGACGATCC TATGATTACCGTA TTTAT  
CCCAACTACTC CAAA TCC TACTTCA GGG TTTTC TCACGCTATTC AAAAAATCTGACATTACTTT CAAA GAT  
ATGAAA ATCGAAGACGCC TTTAAA TATGTAATCTCTTGTGGAGT AT TAAACTCAGATCCCTGCGCTACCT  
CACC TTTCATACA ACC ACAGTCTTAGTCCCCCTAATCATTATCTTCTTT TTTAAA AAGAAGG GAA TTTAGT  
GGGAACCAGACTC ATAGCTCTATT GAAA AAAAAACGGCGCTCTACTATTC TGTTC TTTTC ATAAGCAACA  
GCAGAGT TGCTAT TTTCT TTTTAAA TCC CTTCCC ATTC AAGGAAGGCAGAAGGAT CTTGTTGGGT TAT TTT  
ATGACAC GAATGAG TAAA CAAGCTCGCCGTAGAGCTCAAAGTCCAAAAAACGCAAGCCCG TTTATGCTG  
TTCAGCATCCACAAGATGCTTCAA GAAT TGCT TTTA AGGCCCACACTAACACAGCAAAGGTGTTGGCGT  
T CAAA TTCCTCAAATGGTTAATTATTAGAGAAA TAACATGTCTAGACATCGTAGTTACGGGAAGTCCGT  
CAAGGGAGAGACTAAGA GAAA CGTTC TTAAGCGT CAAA AGCGCATCGAAGTGTACG TAAA TTAGGACGC  
TGGGACGATGCTACTGC TAAA AAAAGCCACAGGGCTTCTTAAG ACTC CTGTAATCAAGTAAGTTATATTTT  
T CAAA CTTAT CAAA GAT CGATCTTCTCCTCAAATTT TTTATTTTC TAACGAACAACAAGATGTTAGCATAGA  
TTTTA CAATCTGCTCAGCGTCTTGTGTTCTGTT CAAA GAAC TACAAAAAG TTTTC TACAGATCAGGTGTAT  
GTTTAT TTTTC TAGACGACACAGCTCTTGCTCAGCTCCATGACGAGCAAT TTTTC TATCC TTTCCCTAACAG  
ATACCATTACTC TTCCCATAGATAAGCCTGGAAT TGCTTCC TTTTC CTCATGTT TTTA GGAGAAGCT CAAAT  
AAGCCC TAAAGCAGCTATGCG ATTC TTGGAACAATATACCGAAGACCAATTGTATCAT GAAA TCTCGCGC  
TATGTCGTCCACTC CTTACTGCATATGCTAGGGT ATGATGATCAAACCGATGAAGACAAACGCATCATGC  
AAGAACAGGAAGATGT ATCC TTTTC CTT TTTA GCTGAACACCAGGCGTTATTACGTCCTGCAGTA TAAAA  
GTCTTCGCTTCCCTCTAGAAA TCTCTATATCGA TAAA AATTT TTTA TCGTAACATGCAAGTAAGCCTC GAG  
TCTT CAAA TGACTC TCCCAATAA TTTCT TTTA CAGGAGCTGGCTT TTTTC GCCCTCATCATGCTATATA  
TTCTGCTGGCTATTATCGTTCTTT TTTCT TTTTC CTGCTCAGCAACTC ACCGCAGAGCCTCTA TTTACG  
ATACGGAGGAGAAGCCTTCCCC TTTCTCTTCTGTCC TAAA GTTCTTCTCTCC CAAATTTAATTTAC  
GGAATGCTTGGAGCCCCAGTCTACCAGTACATCC ATAACTTCTTCTCTGTCTCCCTCAATTT CAAAGC  
TCAT TTTCTATC CAAA GCTCTAGTTA TTTA CAAATTC TTACCC CAAA CCCAGGCTATTCGGACACTC  
CTTCAGCTACAAAG TTTCTCATCTACAGT TAAA ACCTTG GAAA ACTGTCTTGCTGGC TTTAAA ACACCT  
TCTATCACTGCTATGCAACAG ACCC CTCCTCCAGAACCTCCCAATGAGCTATCC AC GAATATCTCCTGTC  
TCAATCATATGATCGCTCGA GAAA TTATG ACTC CCAAAGCTGACATC CAAA CTTA CAAGGAGACACCC  
GAT TTTTC TCAAGC ATTC CCTCTAATCATAGACGAAGTTATAGCCGC ATTC CTCTGTTACAAA GAGTATT  
GATGACATCACAG GAATGGTTCTCG TAAA AGATCTGTACCTG TTTA CTATAA GGATCCTCATACCTCCC  
AACC TTTATCATCGATCGCCT ATCC TCCCTTGTACACACCA GAAA TACGTAGAGCCTCTCTACTC TTACA  
AGAA TTTTCGTCAAAAACGTTGTACCTAGCGATTGTCGTTAAT GAATAC GGATTTA CAGAAGGCCTTGTCT  
TCTATGGAAGATATCGTCGAA GAAA TC CAAAGC GAAA TTGCAGAT GAATACGATGACCAAGAAGATGTT  
ACTACAAAAAATAG GAAATGCCT GGAT TGTAGACGGACGCATGAACA TTTTC CGATGCCGAA GAGTGC CA  
AAGACTC CATATAGAACAT GAAA GTAGTTACGAT ACTC TTGGTGGCTATGTATTC CA TAAA TTAGTGCC  
GTACCT GAAAAAG GAAT GAAA A TTTA CTATGAAGAT CAAACTATAGATATCTTATCTTGCTCTGACCGTA  
GCGTAGAAAAAAT GAAA ATCACTC CAAGAAGAA GAAA GCCTTTA TCT TAAA TACA ACTACTTCTCAAT GA  
AACTACTAG TAAA TCACACTCTCTGTAGCTGTTGTCC TAAA ATGTATAGCCATAGTAGAAGGGAGATTACG  
AAA AGGTGCT CAAA ATCGTGATA TTTCATGCCT TTTTC GTGCAATCTCTA GAAT ATAGTGCAGCCCTTCTA  
ACTACTTAATCTTAG GAGT CCT ATCC CAAT GAGT AAC TTTTC A GAAA GAAGAACAAGGCCAAACAGGC ATC  
CTTCA TTTTCAAGG GAAA CTCGATGGTGTCTCCTCTCCAGCTGTACAA GAAA GTA TTTCTGAAT CTC TTT  
CCAATGGCAT GAAA AACATTATTC TGGACTGCGGAGA TTTAGATTACATATCTAGTGCAGGTATCC GCGT  
GCT TTTA CAAAGCTATCACCAAGTAGG GAAAAATGCGGG GAAAA ATTGCTCTCACTTCTGTCTC TAAA ACA  
GTGGAACAGACTC TTTA TGTACAGGCTT CAAA TCTTAT TTTA AGGTCTTCGACTC TGT GAAT GAAGCTC  
TACAAGC TTTA GCAAAA GAAA ACAGTTA ACCCTACCTTCAACTC GCTCTCT TTTTC AAGTGATGCGTAGTT



CTTTATTATTGATAGGAGATACGGCATTACGCCATCCCTATAATCCAGGATTCACACTTATGACCTAGC  
AGCTTCTTGGTATGACCTGACTGCAAACCTCAAAATTCAAACCTGGATTCTCAGCCTTTCTTCAACTATT  
TCATTTTCAGCTTCAACAGGAGTTCTCTTCCACATTTGAATTATTTTCAGAATCAATAAAGAAGATATTACCA  
GCAAAGCAGCTGCATTACTAAAACCTCCAGAATCGCTTATGCAAGAATACTATACTTTATGTGCTATGA  
GC TTTC TGAAGA G GAT CAAA CAGGGT TAGAACAG TTTA GAGACTATTATGACCGACTTCCACGACAAGCC  
AAATATCCAAATCATGTTTCGATTCCTTGGCGCTACCTATGATAAAAATCAATGGTATTCATCATTAGGC  
TTGCATATAGCTTGAACAATGC CAAAG TTTC TCTCTTAGGAGAAAATAACCATCTATTAGATTTA TGTG  
CAGGAACAGGCC GGGTAGCCCTATCTTATGTCCAGAAT ATCC TCGAGCCTCAGCAACTCTTGTGTTGTT  
CTCAACAAAAATGCTAGAAAACGTCCAAAAACGCC ACCCTCAGCTCC ATTC TCCATATTAC GAGTGAC  
GTAACACACTTGGCGCTTCCGGAT AATACG TTTC GTTAGCTTCTATGGCCTAT GGATTACGGAACTTAT  
CCATATCCATTAGAGGCTCTTAGGGAAGTGTATC GAGTATTACAACCTGGAGGACACTT GGGTATTC TAGA  
ACTAACACGCCCAGCAACATATA ACCAG TTTA CCTGCTACACAAGCTCTATC TAAA TCTTGTGTTCCCT  
AGCGTCGGCCGTT TTATTTCTGGGAACAGCTATGCTT ATTCGTATCT GAAAGAAA GTATCCGGGATCTCC  
CACGCGATGCCGCTCTCGAAGCAATC TTTCATGCAGCGCATTTA CGCCCTATCCG GAAA CGCAAAC TACT  
TCAAAGCACAGCAACCA CAAAGAT TTTA GAGAAG TAAA ACTACCAAACCT TAAAAGCAAGGCTTATGAAC  
GGCTCTTCTTACGTCCAGC TTTCGTAGT TTTC TTCGG CAAA ATTC CTCTTCTCGTCTGCTGATCTCCTC  
GTTGAA GAAATCC CCAGTCTCTCCATCGCTATCGTAACCAAGCTTAGC GGATA ATTC TCGCAAA GAATCA  
AAACGCTCAGAAA ACTTAGC TAAA TTCAACTGGTCTTCCAGACGCCCTCCTCCTCGCAAGTGTGCGAGGA  
ATTC TTCTTCTGTATCAAATTTTTCAGAAA AAGTAAGCGAAGAAGGAGATGTTATCTCTGG TAAA AATAG  
AAAACGTCGTGCCGAGAAGGGACT CAAATATAGATATCGTTTCGATATGGTTCGCTCAGCTTCAACC CAA  
ACCGACTGTTTA GGAGTTCGCCCTCTT CAAAGACGAGGGGTTTAAA GCCTCGTTC GAATAGTATAC TTTAG  
ACAAATTTAAAAGAAGCTGACGCGCTGTGTTAACTCT TTTC GATACCTTGGCATC GAATAGATGTACCTT  
CAGTTGTTCTAAA ATGTGCTTAGA GAAATCAAGGTCTTCTTCAAAGACAAACT GAAACTGATTATTACGA  
AGCCACTCAATGATGC GAATACGAGAACGCTCAACA TAAA ACTGTTGCCACTTCTCCTGCTCAGTCTCAT  
GGTCATA TAAA ACTCAGAAA CTGCTCTCGCGCATTC TTAGACTGCACTATCTC TAAA AATT TTTCTTT  
AGTATCGATATCG TAAA TTTTTTCG TTACGAAA G TTTC CATGATCTTCTTAAT TTTC GTAGAAGTCAAT  
CAAAGAATCAAGCAATACCGATCCGCAT TTTC TTCCAATTCCTGATAAA TCTTATCTAGATCTTCTGAT  
CTTTATCAAGATCTATGTACAAGA TAAA CCCTTCTACCCGATC TAAA TAGAAA TCTCTCTCGTCATCAGA  
CTTCGAGAAGGCGTCCATCAGGCGTAGAACGCGTAA TAAAAGAGGAT CAAAAGGTACAGGATATGTCGTC  
ATAGGCTCCAGTATAGGGATGCTCTGTTAGATAGCAACTCTCTCTTGTGTT ATCC TCAAT TTTATCCAA  
AACGCTTTGATTTA GGCTCTAACCC ACCCAAAGTTCTCACTACG ATTC AATAGGCTCACAGG ACCCTC TAA  
AATACCTTGCC TTTC TCAGAAA AAATCTTAATCAGA TTTC TACTACGAGAACACCCGCTATAGA GAAA  
TCTTGTCTTAGA GAAA AGATATCC GCTGCAACCAAAGCACTTGCCAAC ATCC CTGTCCACAAGATAAG  
TTTC TCGCTCACAACCTCGCTCATAAGTATAGACAAGCAGCAGATC ATCC TTCTTCCGCTGAACAAAATC  
TACA TTTA CACCTCAGGAGCAAAATCTCATGATAACGCAAGAAA GACCCCATTC TTGTACGGGAACC  
TTACT TAAA TCAGAAA C GAAA ACCACGCATGCGGA ACCCTGTATCAA TAAA AAATACTTGTTCGGCA  
TACCAGGCAACACATGCGTTAA TTTC CGCTCAGCTTT TTTC CAATCAGGTAATGTATATCAACCAATAC  
CCGATTC ATAGA GAAA AGAATTAACCTTGG TAAA CACCAGTTCTG TTTC AATA GAAA CATCTTCAAGTCCA  
AAGCACTGGGCTACGTGCGCCATTGCGCACCGCA ACCCATTC CCGCACATAGACGCGATAG ATCC ATCAC  
TAT TAAA AACAGT GAGTTTAGCATCTGCTATTTC AGAAGACTC TACACATAAAA ACCCATCAACCATCTC  
TTCTTGGCATAAAA AACAGAAC ATCC TCAAGAGAAGGCATCGATTC TCCAAAAT GAAACTG TTTC CTGCT  
CCA GAATA TAAA AGATATCTACAAGTCGT TAAA AGAGAAGAGAATCC CATCTAACAGTCCAAACTC CATT  
GCTTCA CAAAC ACTCATCC ACATATCTCGATCGATAGC TTTC TCTATCACCTCTGGAGATTGTCCAGTTG  
CCTCGACATACACATCAATAATGCGTGCT CAAA TT TTTAAA TTTC ACGAGCAT GAATATCC AAGTCCGT  
GGCTTGACCAGTAATGGTTCTCCTCAATAGAAGGCTGGT GAAT CATAATGCGCGCATGAGGCGTAGCAAAA  
CGTCTTCTTGGAACAGCACAAA ACTCAATACAGATCC CATAGATGCTGC TAAA CCTGTAACAACTGTAG  
TCAAAGGAGAAGAGATCAT TTTAA CAAAGTCCCAAACAGCAA ACC AGCATCAACAG ACCCTCCAGGGCT  
ATTAATGACAAATACAATTGGCTGCCA GGAT TGGT GAGTTCCAAATACCAAAGCTT CAAA ATGGCTTCT  
GCAGCACT TTTC TCCGTTACAGGTTCGGAGAA GAAA ATACGACGA GAATCC AACAACTTTCTATCTATGA  
CATCTTGCAACTTATGCATCA TTTC CCCTCAGGCATA GAGTCTCCAC TAAA CTAGCG TTTC CAGATCG  
A TTTC AGGATAAAA GAGG GAATCTTCTTAA TAAA TCAGCCACACGTTGTCTCGCTTCTGAGCGATCC CTT  
CTGACAGCTCTCCCTCACT TTTA CTAGAACCCTCTCAGCATTGCTTCTCACAGTAATA TTTC GCAATAC  
TTTC ACGATAAT ATTC GCAACTTCTTCCA TTTC GGCCTGCCC ATCC CTAGCGTTGTGAGAGCTG GAGTC

CCTAATC GAAT ACCAGAAGTCTTCCACTGCCAGAGGCATCTGAAG GAAT AGTATTACGATTTA CTGCGA  
TACCTACTGAGGTAAACATATCTTCTGCAATACGTCCAGGG ACTC CTAGAGAAGTTAGATCAATAATCAA  
CATGTGATTATCTGTCCC GCCAGT GAGT AATCGTAGCCGTTCCGCTGGAACACTTCAGCCAAAGTCTGT  
GC ATTC TCTACCAC TTTA TGCGCATACTTCTT GAAA TTGATCGTCATAGCTTC TTTC AGAGCAATAGC TT  
TAGCAGCTATAACATGAGGAAGTGGGCCGCCATCATTAGAGGACAAGCCTTGTTCAAGGTA CAAA CATA  
TTC TTT TTTA GCTAGAACCAATCC ACCTCTTGGCCCTCGCAAAGTCTTATGCGTCGTCGTTGTCACGATA  
TCTGCATAAGGCATA GGAT TTTC TTCTCCTACAAACACACCTCCAGCAACCAAGCCTGC GAAA TGAGCCA  
TATCCACCCATAAAA ACAGCGCCACAGTCTTCTGCAA CAAA CTCAAGGTGGCAAAGTT GAAT CGTCTAGA  
ATAAGAC GAAT ACCC TGCGATCAGAACGGTGGGCTTATGTTTC TTTC GCTATT CAAA CTATCTCATCATAA  
TCAAATA ATTC AGTATC TAAATTC ACCTCATAAGGGAGACAATGCATTAATTTA GACATGAT ATTC ATGC  
GCACAGTCCCATGTGT CAGATGCCCTCCA GAAT TTAAA GAGGGGCCTAGGCACAAA TGCTGAGCCATCTC  
AGCT TTTA ATGCTTCGT ATTC CTGCTCAGGCAGATCATTGATCGT TTTA ATATCC CAACTGTTGAACCGCA  
GGGCTCT GGAT CTCTGTGTAATGATCGACATGATCGCTAA TAAA TTC GCATCGGCCTCCAGAAT GAGGCT  
GAACAAAAGCAC TTTC CGCACCAAATA ATTC CAAA CCGTCTCTGCGC ATTC CCATTCAATTGCATCCAC  
ATTC TCGCAACAG GAAT AAAA ATCG CAAAAAT GGGCTCCCTT CACAATACTTGTCTGTAAG TAAA TTC CCC  
ATAGCAAGTTGCACAGATAGAGAA GAAA AGT TTTC TGAAGCAATCATT TTTAAA CGAGATCGCTGACTCT  
TTA ATTC TTGTACAATGCTCTGTCTATAGATG GAAA AGCGTGTAAACAGATGATCTAATGATGC TAAA TA  
GGCCACTGATGCCAAAT CAAA CTGACT CAAA TCG GAAA TATTTTC TCAGATATCT ATCC AATAACGATGCC  
ATA TTTC CACCTCCACTGAT TAAA CTTGCAAGACCTTGCAGAGGC ACTC CTT ATCC TCTACCCACTCTC  
TCTT ATCC TTTA TGG GAAT CTAATCT CAAA ATG GAAA GTC TAAAC TTTC TAGGA GAAA GAGGATTTAT T  
TTA ACTATAACTACAAG AAAA AAGAAA CGATGCTTCCAAGACCATTACCAAGCGCCCATTTTTC CTAGTC  
GCTTACCATAAGGTGC TTTA ATACCATCGCAGCTTCAGTTGATCAT ATTC TTACAGCAAAGTCAAGAAG  
CTTCC TACTAG GAAA AAAGCTTCTCTTCTA TTTAAA AAAA ACTC TAACAT GAAA CCT TTTA CACAAGAGA  
TCTCCCTCATCGATCATGCCTCTGTACTTAGGCCTCA ATCC ATCC TCTGCTAAA CAAT ATTC TGCTGTT T  
TTC AGCCTATT ATTC GCATAGTCCCTT TTTC AAAACACGTTCCCTCAAATACGACATGCTAGGAAGTTCCCT  
TGTATCAGCTTCCCATAT CAAA TTAACAAGCCCTCTTCTACCGCTTGT TTTT TTTC TTCCATTAG GAAA  
AGAATCC TTTA TCC CTGTT CAG GAAT AAATCC TCGTT ACCATAGGAGAAGCCTCTTCTTCTCGTG TAA  
AGGCC TTTC TCCCCAAAGCCAATATTGTGCAAAGCGC ATTC CCTCAAGCAGAAGCA TTTC TTCCC ATCCT  
ATCG ACTC TTCCCTCCAGCTCCTCCCT ACTC ATCC TCACTC GTACTCGCTCGTCCC ATTC TCCGCTCT  
CTTCTACAAAC ACTC CC TTTC TCCCTCT TTTC CTATCC TATTACACAGT TAAA CCC ATTACAC TTTC CG  
TAAGTACC TTTC TTCCCATAAAA ACTATT ATTC TCACTAGCCCTTCTATCGTTCTGTCCTATGCACA ACT  
ATTC CCTGCCTCCCTGAT TAAA GAACACTGGTGTCTAGGAGAGATTAGTGCAGCA GAATTC AAACAGATA  
TTTC AC ACTC CTCTCCAAAATTC TTT TTTC AAC TAAA GAACCGACAGGAT GTTGATAACAATC TTTC T  
ATTTA TTTA ATGAAGATCTCTTCAAGAAGTTGTGAAGAGATCTTACCTCT TTTA GAGGCATATAATTC  
CTGTCCC CAAA CAAGCACATGACC GAAATCC CTCTTCT CAAA TTCTTCCAGATCC GAATGGAT ATAT  
CGGTAGGTATTGGTCAGGACAGTCACCGT TTTC TCCCTGACGAAG ATCC CAAGCCCTGCATATTAGGTG  
GCATTATT CAAAAA AT ACTC CA GGATTC GAAGCTA ATTC GGAT GGAGATGTTGTCTCCATGCTATATG  
TAATGCGT TTTC GTCTGTAACGCACAAAGGTAT CAAA GGAGGACTGGCTGACGAGCT CAAAAA AAAAA  
GGCATTACCGATAGCGTAGTCTATCTACAAGAAGCTGTCGCCTC TTTAAA ACCTACACAAC GAGT CTCGC  
ATCTAGCTATTACTATAGAAGGGAAGCGTCC TAAA CTGCTCCCTCAGTTACC GAGT ATGCGCAAGAGAAT  
AGCCGAGGTTCTTCA C ATTC CTCTAG ATTC CATTAACTTACAGCCACTTCTGGAGAAGGCTTAACTGCC  
ATGGGACAAGGAT ATGGTGTTCATGCT CAAA CGT TTTA ACTATTATG GAAT ATGTGCGGTATTAGTATA  
CGTCT GAAA CTAGTCTCTTCTGTGCAATCAGCTCTCGTACCGCTTAGGACCTAATATCTGCTC TAAA GC  
ACG TTTA ACTTCCGTACCAAGGAT TTT TTTC CCACAAACAAAAA GAAA GCTTCTTGTTCTGACTTCT  
TGTATAAGTTCTT CAAA TTGCTCTATAAC ATTC TGAACATACAA TTTA GACTC GGAAT CTCTG GAAA AGG  
CTGT GAAT AACTG GAGT TTTC CT GAAA CGATCAGCTCCTGGAGAAA ATCC CCGTAATAGAAGTTACT TTT  
CTCAAACGCTCTCCAA GAAT AGAAT ATTTGGAGCCTACGTCTGATGGTAT ATTC GATGTTGTAAGAAC  
CCAAA TACGGAGCGATACCTGTCCCTGCTCCGATCATAAT TAAA GG TTTC CCAAATTT TTTC TGCTCCA  
AAG TAAA ATGCCGCGTCGGTTGTA TAAA CCC AC GAAA AG ACTC TCCCTCTTGTAAGTCTTACA TAAA AA  
AGCCGAACATA ATCC ATAGCGCAGCTGCGT TTTA CCTTG GAAA CTAACACAGCGCAGGCAACTC TAGC  
TTCCCATGAGAACATGTTGGAGAAGAAGCTATA GAA TAAA ATCGAGGCAAT TAAA GGCATCGC ACTC GAA  
TAAA CTC TTCAAAG GAAT ACGCGGCTGG TAAA CCAAATAGCTT CAGC TAAA GACCAGGTATCGTC TAA  
ATCC CCTGG GAAA AAAGGTCTTAACGAT CAAA GAAT TTTA TCTAAGTCTACGTAAC TAGTAA GAAA TTCG

TGAAGAGGGAGAACA GAAT CTGCATGCCGAGATACGACAGGAGACCTGGGGCCATACTG TAAA GCATCCA  
GAACT GAAT CGACTAATGTGGAA GGA CAA ATTGG GAATACCC CAAA GAATCC CCAAC TTTA TAG GAAAT  
CTCAGAACGAACC GGAT TACA TAAA ATCT GAAA AACAGGATCC GAACAAGTATTC CCAATATCC GATGTG  
GAAGAACAAGCTCACGT GAATG TAAA AACATCC ACTGAGC CAAA AA TTTAGAAA A TAAAGACATT TTTA  
AA TCAAAA GAAT TAGGCAGCCTTGATCTTAATATCT ACTC CAGCAGGCAAAGACAACAT TTTT AAAGCAT  
CAATCGTC TTTT CTGTA GGATC TAAA ATATCAATTAATCG CAAA T GAGTAC GAA TTTT CAAACTGCTCAG  
AGATTT TTTA TCTACGTGAGGAGATCGCAACACCGTATACACTTCTCTC CAAA TTGG TAAA GGAAT TGGA  
CCAACAACACGAGCTCCAGTTCT TTTA GCAGTCTCAACAATA CAAA CTGTAGACTGATC GAGT TGCCCTT  
GGTCAAACC TTTT AAGC GAATCCGAATTC CAAA TT CAAA CTGCTTCATATATTC CTTACTTCTTAACAA  
TCTCTTCTT GAAT TTTT CTGAGGAAC TTTAGCAA GAAT GCAGGTTCCATAGTCGACGTAGCTCGACCAGA  
AGTTAATGATCGCAATGAGGTCAATATATCCAAACA TTTT GCTCAAAGGAACTTCTGCGCTGACCTGCGCC  
ATG TTTT TGGAAGATTC CTGACC TAAA ATCTTACCTCTACGACGATTC CAAGTCTCCAATCACATCTCCAA  
GATGATCTTCTGGAGT AATAACCGTTAC TTTT ATAATAGGCTCTAAGATCACAGGAAGAGCT TTTT TACA  
AGCTTCT TTTA CAGCCATCGATCC GCAAATCT TAAA GGCCATCTACTAGAGT CTACCTCGTGATAGGAT  
CCGAACACAATGCTTACCTTGACATCGACTAATCCATATCCAGCCAGC ACTCCGGA TTTAATCC CTCTT  
CGACCC TTTA ATTACAGCTGGGAT GTACTCTTTA GGAAT TACC CTCCGACGATCTTACTGACAACCTC  
G TTTT CT TTTT CAGGTTCA CAAA GCTCAAT TTTT CAAGCAAACGTGAGCATATTGTCTCGACCACCAGAC  
TGCTTAACGTA TTTT G TTTT ACTGTTACTTGT T CAAA TGATCGTCTC CAAA TAA GAAA CCTGTGGCTTAC  
CAACGTTAGCTTCAACTCTGAACTCTCGGAT CATAAGATCACGGGA GAATATCTAGGTGCAATTCACCCAT  
TCCA GAAA TAATCGTCTGTCTG TTTT TTTATTAGTA GAAACTC G GAAA GTT GGAT CTTCTCAGAGAGA  
GCACTC AAAGCCTGAGCTA ACTTCTCTCT ATCC CC TTTA GACTTAGGCTCAATTGCCATATCAATCACAG  
GTTCTGGAGCTTCAATACGTTCTAGCACAATCTCTGGTTCTCATCGCAAAGAGATATCCCTGTTACTGA  
GAAT TTTAGCCCTACACACGCACCAATGTCTCCGACG TAAA CTG TCCCTATCGGTTGCTCGTTAGCA  
TGCA TTTT CAGAAGCTTTGAGATTC GCTCT TTTT TTATC CAAA GTC GAGTTAAGAAT GGCAGAACCC TTTCT  
TCAAAGTTCCAGAG TAAA TAC GGAT AAA AGTAATACGTCCAACATAAGGGT CGGTCATGAT CAAA AATGC  
TAAA GCAGCCAAAGACCGTCT CAAA AAGGCTTCAAGGAGACTTCTTCTCCAGT TTTT CAAATTAATCCCA  
CGAAC ATTC CCACGATCAAGAGGAGAAGGCAACCCTTCAACAATAACATCAAGAAGCTGTTGAACACCTTT  
TATT CAAAAA GCACTTCCGCAAAGA ACT GGAT TGAT TTTACCC TCAAT CACTC TTTACGCATTACAGT  
ATGGAT TTTCTTCTTCTGTGATAGAAT CTGGATTC TCCAGCAC TTTT TCCATAAA GGCTTCGTTGC TTTTCA  
TCAACGGTAGCTAGTTCTTCTAATAATGCAATTC TCAAGTGTGCGCACTGCTCTTGCAAATCTTCAAGAA  
TCTTGCCTCTTCCCA TTTA GCTCCTAGAGTCTCTTCAAG GAAA TACAGAGCTT CAAA AGAGATCAAATC  
TACC ATTC CCACAATTTGGCTCTCAGAACCAGATTGGACAATGAACAG GAATAGCGTTAGCTCCCAGCTTT  
TCTCTCATGGACTC GACAGCGCAAAGTA ATTC GCGCCATACGGTCCAT TTTATTTA CAAAAGCA ATTC  
GAGGC ACTC CATACTT ATTC GCCTGTCTCCAAACAG TTTT CCGAT TGAGGCTCGACTC CAGAAA CAGCATC  
GAAA ACGGCAACAGCACCATCGAGAACTC GCAATGAACGCTCTACTTCAATAG TAAA GTCAACGTGCCCA  
GGAGT ATCAATAATATTAATC CAAA CACCCAGCCA GAAA ACGGTCGTAGCAGCAGAGGTAATGGTA ATTC  
CTCT TTTT TTGCTCCTGTTCC ATCC AGTCCATGGTTGCTCCACCTTCGTGGACCTCACCGATCTTAT GAGT  
TCTTCCCGCGTA GAAA AGAAT GCGCTCTGTTGTTGTTGT TTTA CCTGCATCGATATGCGCCATGATACCG  
ATA TTTT TAATCGCGTC TAAA CCGAACTCTTGATCGTCTCATCGAATTT CAAA CCTCTCACACAC GAATG  
TTAAA CGTTATCTTACCATTATAATGAGCAAATGC TTTTACAAA CTTCAGCCATGCGAT GGGT GTCCTCG  
CG TTTT TTAATCGTAGCCCTTG TTTA TTGAAGCAATCGATCA ACTC ATTAGCAAGACCGACTTCCATAC  
ATTTT CCTGGCTTAGAACGAGCATGCTTGATA ATCC ATTGCATAGCAAGACAGCTTCTTCTATCAGGAGC  
CACTTCAACAGGA ACTTGGTAAGTAGCACCACCA ACTC TGCGAGAACGCACTTCAA GAATAGGCTTCGCA  
TTT TCCAAAGCTTCTTC GAATCC TTT TAAAGGATTC TCTAAGCCTAATCTTTTA GCAAACGCTC TAAAG  
CACCG TAAA CAATC TTTT TAGCGATGCTCTTCTCCCGTGCAACATTAC CAAA TTAA TAAATC TTTT TAA  
GACTACGCTCCCG TAAA CAGGAT CGCCTG GAAT GACCTTCTTCTCAGCCGCATGTCGTCTTGACATA TAA  
ACTC AACCTCTTCGTA TTTCT TTTCTTTAGG TTTA GGAACACAGCCTACTTAGGACGC CAAA CGCCGTAG  
CGAGAACGGCTCTGT TTTT TATTT TTTA CGGCAGCACAATC TAAA GCACCTCGGACGATGTGATAACGCA  
CCC CCGGCAAATCC TTA ACTC TTTCCGCTTGACC AAAACGATGCTGTGCTCCTGCAAATTATGACCTTC  
TCCACCGATGTAGGCAATCACCTCTTGTCCATTAGACAAACGA ACCC AAGCAACCTTACGCAAAGCT GAG  
TTAGG TTTT TTTGAGT TTTA GTT TTTA CCTGAAGACAG ACCC CTCT TTTT TGAGGAGACT CAAA TAAAG  
CTGGAGA TTTT TTTT TAGTTGCGCCAGACTGACGCTTCTTACGTATTA ACTGATTAATCGTCGGCATGTA  
CTC TTTCTCGATTC AACCTCTCTTACAACAG GAAA ATATAGAAT AA GAATATC CAAA CAAA CAAG GGGT

ATTTC TAGGTCTAGTAA GAGTTTA TCGATCTCTATAACAAT TTTA T TAAAAACA TTTCCTC TAAA AGAT  
TTTC T TAAAAACAAGCCTTCCC TAAA AATAATTA TAAAAAAGAGT TAAATCC TTGCTGA TAAA ATGT TT  
TC TTC GAAT ACTGTTAGTTCAAAAAC TT GAAAAACAAGACTTGTATCAT GAAA GTTGTGTGAATCC TACT  
CAAGAATATTCACAAA TTTC AACTC CGGTATTGCCGAAAATCAACGTGTTACGTTT TTTCGAAA TACCG  
CAATGCTAACCTGCAGCCT CAAA TTCACGCTGTGTTCGGCAGTCCTG TTTA TTATTGGTCTT TTTC CTCA  
AACCCT ATTCT CAAA CTGGAGCATTT CAAA TCATCG GGATG TTTC TAGCCT TTTC AGCACTC TGCATC  
TTTC TTATGGCTCTTATCTATAATGTGAAGAACTGGCTATCTCACAGACCT ATTC CTCTTCCACTAT TTT  
CCAATA TAAAT TTTC TTGTCAAAAA GAAAAATA ACCC TCCGTTACC TTTC CTTC TGAGAAAAAAAAGT  
TTTT TTTCAGAGC GAGTAGG TAAA CAACCAAGTACTT GGGT TTTA TACAACAAAATACCGACTC AAG CAA  
ACGAAA CTCCTGTGCAAGATAC GAAT AATCACGATTAATAGAGAT ATTCGTAATGATGAGATTC GCTCGC  
T CAAA TCTGCTAGT TTTA ACCC TA TTTC CACAACCTTGCCT TTTC AGCAGAGCCTCTTCGACGACAAGATG  
TCCGCAAAACCGTAGA TAAA CTAGTCGAACATCATATTGATACGCAACAGATCTCTCCTTAC ATTC TCTC  
TCGATC CAAA GAAGATTATGTTCTGTCT CAAA ATTC TCACAAAAGCGTACCTT ACTC AAGACGAGGTCTTC  
TCCCACGCTT TTTC AGAAGAAGCAACAC ATCC CTA TTTA AGCAATATCAAGAAGATAACT TTTC TTCT  
TC AAG GAAT TAGATACCTGTATCC AACAAAGTA TTTC TCGAGCCAGA GAAT GGCCTC ATCC TGGCTCAC  
TGATTC CATA CAGGTAATTC AAGATGCCATGTCTCATACTATTGA GAAAAAACCAAGCGCTTGGGCTTCT  
TCAATTGAAGAAG TAAA GCAAAGACAATACGATCTTCTTCT TTTC CTACGCATCTATCTA TTTA GAAGATG  
CAGCAAAAATCGTTATCAAGG GAAA GAACATGG TTTA GT TAAA CTC TGTATCC GCCAGATT GAAA ACCA  
T GAAA ATCC TTATATCGGCATTAACGATCAT GGATACAGAAT GTCTCCGGAGGAAGAGGCCAATAGCTTC  
CATGTTTCGTATTATCAAATCTATTGCTCATAGCCTAGATGCGCATACCGCTACT TTTA GT CAGGAAGAAG  
CTCT ATCC ATGAGAGCTCAGCTGGA GAAA GGCATGTGTGGCATAG GAGTCGTGCT TAAA GAAGATATTGA  
TGGGGT TGTGGT TAAA GAAGTCTTGTGAGGCCC TGCTGAT TAAA ACGGGT AGCCTTCGTGTAGGTGAT  
ATTA TTTACCGTG TAAA TGG GAAA AATATT GAAA AC ACCC TTTC CCTGGGGT TTTA GATTC TCTAAGAG  
GTTCTCCAGGATCC TCCGTTACT TTTA GAT ATCC ACAGACAAAATAATGATCACGTC ATTC AGTTACGTCTG  
TGAAA AAATTC TCTTAGATAGTCGTCTGTGCGACGTGTCTTACGAGCCGTACGGTAATGGCATTATCGGT  
AAGATCACCTTGC ACTC TTTC TATGAAGGAGAAA ACCAAGTATCGAGCGAACAAAGATCTACG TAAA GCCA  
TTTC GA GAAT TACAAGAAA AAAACCTGCTTGGCTTAGTTCTTGAT ATTCGAGAGAATACGGGAGGATT TTT  
ATCTCAAGCCATCAAAGTGTCT GGGT TATT TTTA AC GAATGGGGT TGTGGTTGTCTCCCGCTATGCAGAT  
GGTTCGG TAAA ACCTACCGCACTA TTTC TCCTCAAAAAT TTTA TGATGGGCCGCTAGCTGT CAAA GTTT  
CTAAA AGTTCGCTTCGGCAGCAGAAA TTGTTGCACAAAC ACTC CAGGATTACG GAGTAGCCCTGATCGT  
GGGAGATCAACAACTTATG GAAA AGGAACCATCC AACATCAGACTATCACTGGAAGCAACAGTCAAGAA  
GAT TTTC TTTAAA GTGACAGTGGGGAGATTA CTCTCCTTCGG GAAA ATCC ACACA ACTC GAAG GAGTGA  
AA TCAGACATTGTT ATCC CCTCACGTTATGCAGAAGA TAAACTC GGAGAACGCTT TTTA GAGTATGCTCT  
ACCAGCTGATCAATACGACAATGTGATCAATGACAACCTGGGAGACCTAGATATCAAC ATCC GTCTTGG  
TTTC AAAAATACT ATTC TCCACA TTTA CAAAACCAGA ACTGG CAAA GAGA GAAA TGCTTCTCAGCTTG  
CTACAATAGCCAAGAACGTCTT GAAA AAAACAAAAAC CAAA AGATT CAAA TCCAACACTT GAAA AAAAC  
AAACAAACAGGAT CGATCG CAAA GAAGCAACGATCTGCAAATGGAA GAAAGTGTGAACATCGTTAAGGAT  
ATGATCC TTC TAAA ATCTATATCACAA ACTC CAGCTCAA TAAA ATCTGGGAGGAGG ACTCTTTCTCCTC  
CT TTTC CATA CATCTGTCTCAGCAGATC ATCC A TAAA AACTGCCGCTATCATCT CAAA CCTATAGAGCA  
ATCTCTTATCATT GGGT CTGATCC ACCAGACTA TTTC TTCTAGATAGAGATACCACT ACCC CATCTATGG  
CATTC AACCTCTCATCAG TAAA CAC TTTA TTAGAGT TG TTTA TCTGCCATCATCGATGATATCTTCTGA  
AGCC TTTA ATATCTTCTTACATAAGCTCCATCTCTCCGGAGAACAGT ATCC TTCCAT GGATAAAATTCCT  
ACGCAGAT ATTC ACGC ATCC CACAATAGCAG GAAT AGCTAGATAGATGGATTTA CAAACGAAGCTGCCG  
AAA CTAG GAATATCGTAGCCATCAC TAAA AGTAGTCTTATCACCACTA ATCC CACCT TAAA TGCAGTGA  
AGATAGAAG ATTC GATATACGCC TTTC AGTGTAAATGGTGCAGAACTAGTG GAAA ATCC TGTGCC GAA  
TTGGAAG ATCC AGCTCCTTGAACAAC GGGTACAGTGTCTATAT TTTA CATTC CTTC CAAAGTTGTGAGCA  
GGGAGT CTACACAAAACCTTATTTT TTTC AAAA ACCC ATCTAGAAT ATGCTCTGAGAAC GAAA ATGAACT  
CT TTTA TTTC ATATAGATAACAAAAAAGCCGCCAG GAATCC CTGGACGGCACCTACACATCGA TAAA  
ATCAAAGATTAATAGATGTGTGT ATTC TCTGTATCA GAAACTGGAACAGTCAATGTATCGGAAGAAA GAA  
TCGCTTCCCCACGAGCATCTCCAGCTGATACTGC TTTC AATGTTACA GAAA ACTC TACAG TTTC TTTA GA  
ACCTAATCTAGGTAAC GAATC GAAT ACTACTGTATTGCCTGTAATCGTTCC TTTA GTTGGTCCAGAGAAG  
GATACAGGTTGCAGTTC TTTA GAGAA TTTA AGCAT TAAAGAAA CA CAAA TATCTTCTGCAGAACCCTCTGT  
TGGTGACACAAAATACGG TAAA CAGTAT TTTC TCCTACACAAACAG GGGT CACAAGTATCTACTACGCACAT



ATGAGTAGCAGCAACTC TTTC CAGTAAGTTGTGCTTCTGCGCAAGAAGTACAAGTACCACAGTCAGAG  
CAGCTCTTACAACAACATTA CAAAT GAATTGTCCAG GAG CAAATGCTCTTACTAGAAC TTTA TACTGTA  
GAGACTCTCCAGGATTCAGTTT TTTC ACAGTCCAACTACT TTTA TTACAAGAAACAAA AGCTCCTGCAGC  
TTCAAGAACTGTGACTC CGGGA GAAAGAGTGTCT TTTA ACGACGACATCTCGCAACACAAGATCTCCAGGA  
TTG GAAACGGAGATCACAT ATTC TACAGGCTTACAAACATAAGACCAATCTGCTCCTGCAATACTTACTT  
GTACGCAAGGCTCGTTGATCACAGTTGTTACGCTTGCTGTATT TTTA TGTCTCCACAGTAA GAAACCAT  
TGCTATATTGGTAGCACGACCACG TTTA AGCGGACAAA ACTCTACAGTAATTGTTCTGTGCTCTCCAGGT  
TGCATATCTCCAA GAG TAAACGTCAGTACACGCTGTCCAGAA GAAT GAGCGTAACT ATCCGGAACA GGAT  
TTTC AACAACAACGTTACGAGCTGTTGCTGTTCTTGGTTCACTACATTAAT CAAATAAACTACTGGGCA  
ACGCAAACAAGC ATTC TCTGGGCC TTCTTG TTTA ACACAGATAGCAGGTTGTCCACAT CAAA TAACCGAA  
CGGAT CTCTGGACAAGCGCATACTGTTGCAGCTG TAAA GCAGCAACCTTC TTTA AGAGGTTTTA CCCATA  
CAGTAAT TTTACTCT TTTC GCCTTGTCTTAAGCGGTCAAT TTTC CAACTAGCTTACCATCAGCAGTAGG  
AGT TGTGCTGGAT CACTGCGTACGAACTCTGCTTCACATGGTAATTGCTGAGT AATGATAACATCAACA  
CAATCCCT TTTA CCTGTAGCAGTAA TTTCAACA GGATAGGGAGATCC TACCGTAGCATA TTTA GGAACAG  
CTTGTGTGAT TTTCAACATTACGATCATCATTAAC CAAA ACTGTATAC ATTC TGCCAAAGCAAGAATCC TG  
TTTAGTCTGTAGC TTTAGACTCATGAACCGGAGCAACCTT TTTA CGGTTTACGGGAGTCTC CAAA CTG  
TGGTTT TTTCTTGCTTT CAAACT TTTA TGAGAAGTGTGTCT TTTC GC CAAAGTGTGAGCTAAGCTAATAA  
CG CAAA TAGAGATAAA CTCTGCCATAGAGGTCTCTAAC ACCCCGCTAGCAAA TAAA CTGCCACACTAGT  
CACCGCAAGATCGTCACTGCTCGTCTGAT GAG CAAATTCATAGGAT CTCCTATTCGCATAGATTATTT C  
AAA TCTGCCATC GGGTAGAAA TTGTTATTAATAACTT TTTACCC TCAACAT TTTC TTGTTAGCC GAAATA  
GTTAGTAAGGAAGCCAACCTTCTTACTAATACTACATCTGTTGT GGGTAGGCTCTTAAC TTGCGCTACCTAT  
TGCTGCA CAAA CCGTCAACTG GAA TTTCTCTAGCTTGAGGGCCATGTTT CAGCATCTTGGTGCGT ATCC  
CTCCGCAAGG CAAA CAAGCTGGGACAT ACCGTTACAA GAGT TGAACCACCGTCTACGTC TTTC TTCTT  
AG ATTC ACAAGGTGAACATT GGATAGGTGCGCAT GGATCTTCAAGCAACAGTCAACGATACGACAACA  
CTACT TAAAGAAA CAACACTACATAAA GCAGC GAG TAAAGCAGTTTT TTTCAATACTTCCAGACTC TTT  
CTAGAAAAGGGCTCTTGAAGTTCT TTTTATCGATAAAA AGCAATTC TTTTAATAA TAAAAGAAA CTAGCCC  
TCATAGACAATATTACATTATAAAA TAAAAATTATATCAATTGTTT TTTAAAACAAATCGTCTAATAACA  
GGTAATTAGCAAATCAAAGCAAACAAA TAAAATAA TAAACAGCTC GGATTC AAAGAGATAAG CAAA CCT  
ACAAACAAAACAACTTTCGATAGAA TAAATAAAC TAAAATCTATC TAAA CTATAGATAACAAC  
AGACTAATAATAATAACA GAATCGGAGGGATGAAA AAATGAAA AGATTTTTCCTT TTTATTGTAGCTA  
CTGCTGCCCTCCTGACACAAGGGT GCTCCTATGAACCC CCGAAA AGG GAGTACATCTTAGCCCAGAAGTG  
CTCCCTCT TTTC AAACACGCCCGAACCTTAGA TTTC TCTCTAGCTCAAGCAGTA CAAAAATGACCTTC  
TTTA CCAAAGCACC ACCTGTGTATCAAGTCTTGAA GAATTGTCTCAAATTAGAAGTCTAAA AATCTAA  
TGTCTTCAAGAGGCTG ATCC TGCAATGC CAAATCGACTTGTGCTGCAC TTTC TTGGATACTC CTCCAA  
TAGAT CAAA AGCATAGGTCAGCCGTGCTCGCTCCTAGCCTTACCTAGTAATTC CATCGAAT CAAAAAGA  
GGAAGTCCCTGT CAAA CACCAGTAATAGCCACATATAGCAGAG GGAT TACAGCCTTCTTATGATGCACTT  
GAAA AGCCTCTGCTAACCAT TTTA GATCC TTGATAGAA GAAATC TTTC TCCATAGATCCTTCTCTC TAA  
ATACTTCACTAGGCTATAACAACATGACTGCAGCCTGCTCTTGTCTAAGCGA GGATGGTAATAACTC CTCT  
TTA CTATATTGAG GAATCGCAGT GAAA AAGAAGCTGGTTAACCC AAC GAAA TCGGCTAACGTAGTAATAC  
GTGATTGACAGAGAGGA GAATTTTC AA TAAA ACTC GTCATTC CAGAGCC ACCCCTTCAATTC TTGTAA  
GAGACTCTCTGGAGATCC TTCGTGGTTAAGATAGTG CAAATTCATCC AGTCTAACTTAC GGATATC GAAA  
ACGGCTCC GGATCTTCCAATTCG TTTAGGATCAAACGCTTCTATCAAACGCTGCATG GAATAAA TCTCTT  
CATCCCTTCCATACTAT ACCCATTAGGGTCAG GAAATTCATGAACGCTTCTTT CAAATATCC AGCATC  
CCGATAG TAAAAAATAGAAGTAGGATTC TTTC TCTTG GAAA GCTTACTTCCATCAGGATTTA GAAGAAGC  
GGCATATG GAAA AACTGCGGAGGCTCCC ACCCAAAGC CAAATAAA GAAGAAGGTG TTTAGGTGTAGAAC  
TTAACC ACTCTTCCCTCGCAACACAT GGGTAATCC CCATCAAATGATCATCAACTACATTAGCAAAGTG  
ATACGTAGGGA ACCG TCTGA TTTA ACCAAACTTGATCGTCAACATCTGCCAAGG GAAA ACGACACGA  
CC CAAA CATTGATCTTCAAAAACAC TTTC TCCCGTCAAAGGCAC TTTC AAAC GAATGGTATAAGGCTGTC  
CTTGCTCTTCTC CAAA TCGAACTTCTCTGGAGATAGGTAACGATACCGGCGATCGT ATCC TCCCTGT A  
CCC CAGGTA CTGGCAACCGCCGCA TTTC CTGCAATTC TTGAG GAGT AGCAAAAACCTTGTACGCACAA  
TCTG CAAA TAAGA GGATCTCTGCGTATTT CAAATAAA TCTCTGTGCGTTCCGGACTGCCGATAAGGGCCAT  
AAGCTCCTCCAACATCTGGACCTTCGTCCCAAC GAATTC CGCACCCTTGGGGCGGA GAAA ATA CAAAC  
TTCATAATCGTCCCG ACTCCGAG CAAA ATCCGTATCTTCAATCC TCAAATCA CAAA CCATTATAT TTT

CTTGCAAAAACCTCAT TAAACAGAGCCATATAAGCAGTCCCCACATGAGGATCTCCTGTAGGAGAAGGGG  
CTACTCTAACCGGTACAT CAAAGACAGTCATTCCGCTACTAACCAGGAAAGGAAACTTTCTTC TTTATG  
AAATGAAC ACCCGTCCC GGGTTCCTGTCCTAT GAATCAGGCA TAAATCGGACCGTTCAAAGCCCTACG  
TTCC TAAACGATACCAGAGAGATTCAATCTTGGCGACTTTAACAAAAC TAAATAAC GAGTT TTTCCGGAG  
CTCTT TTTCAACAAAAAAGAGCCCCCTCCG GAATTC CGGAGGAGGCCAAGCTCTCCCCTGCTGTGCC  
CTTACAGAGAAGGCTCTATCTCTATGAGATAAAAT TTTCTGCGTCTGCCAGCAAATCTGCGCCCAAAGCC  
TCAAAACCTTCTCTCATGGCTGCAAGACT TTTCCCAAACGCTCAGCTTCTTCTTCAGATAATCG TTTCC  
GATATCTGTCTACTTCC GAAACGT GAATGACCC AAGCAGATCC CCGACGCTCTCC TTTCCATAGCACC  
GCGGTGTAGCATAG TAAATCTTCTGTTCAGGAAC ATCCAGCATGGACGCCACTTGTCCCACG GAA TAAAG  
CC TTTCTCGTTATCAAACAGAAGCTCTCCTTGATAAGT GGATTTA GCTCGT GAAT AACGATTACGTCTGT  
AATCC TCTAGATCTTGCAATCTA TTTCCCAAC GAGTAGTCTTCGATGCT TTTAA TTTCTTCTG TTTAAT  
AGCAACATAGATAGCCTGAC GAGT CACATTATGCAACTTGGCAGCCT GAGTAATCGAT ACTCCAAA CGAA  
GTAACAGGAACAGC ATTC TCTTCTTGCTGCTGAACTTGAACCTGTTCTGCTTCG ACCC CTGTATCTTGT  
GTAAGC ATTC CATACTGACTG TTTA GTCCTCTCTCGTCCACT TAAA AACAAATCTTGGCCTGTCTTGT GAA  
TAATGGCTCTGTGACCTTCTAACC CGTCTCTTAGAGCTATGCTTATT GAATCTCTAAGTCGGACAAGCC  
CTTTCCACTCTATTCATAACTTTCTCTTCCCTAG TTTA GCGAGCGCTTACTGAAA AATTGCAAAATCC TTA  
AAAAGAGAAGGTAATAT TTTCCCAACAAAAA ACTTATTAATCAAGTGG CAAAT TAAA AATAAA TGCTATT  
CAAAAA CAAAGT CAAATAAA GTTT TTTACAATAGGAGAGAT CAAA TCCTCTCCTCTACTCTGAGATGAC  
TAGAGAGGATAATACAGACTTCT TAAA AACCCCAATC GAAACCACT TAAA CAAATTC GGGTTAAGGA TTTAC  
AACCGAG GAAT CTGTATAC GAAAATCC TGAATCAACAAAC GAAT TGCTCCGCGAGCCGACC GCTCATAA  
TACGTAACGTATAGCGGAT ATCC AAAGGTATATTC CAATTC GC CAAA AGTAGACTAATCTTATCC CCCTG  
ACC GAAAGCCGTCCCCTCCAAG TTTCTCTCCCCTACT ATTC AAATACAA CAAA ACATGGTTCCCGCTAAT  
AAC CAAA GATAACGTACCTGTATGGCT CAAA TATAGAAGACTGG GGATACATTCCCT TTTCCAAAAGGCT  
CAAGAAGCTCCATAGAAGCAAT TAAA TCCCGATTGATGCGAGAG GAAATCCATCC AACATCTAAG GAAAG  
CGTACGCATTGCATCATCT TTTCTCAAAGAAGA ACTACTAGAT GAA TAAA TTT TTTCTGAATCCCTCG  
ACCTGATCTTC CAAA ATCATAAGCCCGGAGC GAAATCATGCCCGCCATACGATAGAAA AAGGATTCGC  
ATTTA CGAAGA ACTCCTAATAAA GG GAAAGATCC TATAGTACG TAAA GATCCC TTTCTATCCCATCTTG  
GAGAGCAATAATTGCTACTGGCTTGTATAGGTACGCG TAAA CGAGCAGAAA TAATGGGGAT TACTCTA  
GAGT GCCAATTAGGAGAAGCTAATAACAATAGCTGATTGAGCTGTAAGCTTAGGATTC GCAGCTAGAATCC  
TTTCCACATCGCGCAGTACCTCGGCTTCT ATTC GCTGACGCTCTTGA TTTA CAGCAGAAA GCTCTGAGAC  
GATCGTTCCAATATT TTTAGGATCTTGAGACAAAAGTAAC TTTA ACCCTGACTT GAATCTGCCAACCTC  
CC TAAA CTATT GAGT CAAAGAGTAATTC TAATTC CTAGATTGGTCGACGATACTCAGACTTATCA ACCC  
CTGATAATGAACACAGCTTT TTTA AGCCTAATCGT TTTCTCT CAAA CTATTTCTTTA ATTC CATAA GAAAC  
TAAGATACG ATTC TCTCCT GAAA GCCTCCCTACATCTGCAATCGTCCCAAACTTACCAAATC TAAAAA  
CGCAAAGGTCTAT CAAATCT TTTCAAGAAGC ATCC TGCTGGAT CAATTC TTCATAGGTTGCGCATACCA  
A TTTAAA CGCGACTCCTACTCCTGTAAGCTC TTTACAAA GATAAGGAT TTTA TCTAA TTTAGGATTTAG  
CATTGCAATGCAATGCGGAAGCTTCCCTGTAGGCATATGGTGATCC GTAACGATCAGCTCTAT ACCCTGT  
TTA TTGATAGCCTGAACCTC TTTCC TGTGTGATACCGCAATCC ACAGTAAT TAAA AGAGAAA TACCAT  
CC TGCAGCA CAAA GAAAT TAAA GAAGCTGTCTCTCCATGTTG TTTAAA CAATGTCCCGGAACAGCAATA  
ACTTGT TTTCACTC CAAGTACAAA TAGAAATTC AACGATCAAGGTCACGCCTGTTATACCGTCTACATCC  
CCATCTCCATAGATCATCACGTGCTCATTACAAA CTTTAGCTTG GAGTAACCGTGCTACAGC TTTCTCCA  
TATCTAAGAACAAAGAGGTGGAGT GCAATGAGGAGAGCTGG GGATACA GAAAATCTC GAATCTCTTGGAT  
AGACT GAAATCC CCGAGATATGAGCACTTGAGCAATCGCAGGAT GAAGAT GAAATCT TTTAAGATCTTC  
TTTAGAAA GACCTCATTATGCTTA GGGTAAATCC CATT CAAATCCAAGGAGGAT TAAA CTACCTT TTTCCA  
TATACCTACCGGAG GAAA ACTCCTGT TAAAAAAAAGCTCCCTCCTTC TTTAGGAG GAAAGGAGCCCCATA  
ATCATCC CACAAT TTTAGGATCACATACGCCAAGCGTA TTTCATCA TTTA CCGTAGA GAAT CAAA TTCT  
TCCTTACGCACCAT GAAT AAGAGAAGCGGAGGAGCTATGTACAATGAAGATAGCGTTCCCTAACAAAGATCC  
CCACTGTCTAAT GAAT GCAAAAT TAAA ATAGAACC TCCCCAAC GAAT AACAAAATGACCAGTACAGA  
TAGAGT TGTGCGGTAGTATAACTGTACGTCTAATGTCTTCTGCAATGCATCATTGATCAAAATCGGC  
ATTG GGGT GAACAGTT TTTCCGCGGATCTTCTC GAATACGATCAAAAATAATCAACGATTGTTCAAG  
AGTACCCTAGCACTGTCTAATGCGCCTATTGCTTGCAAATCAATCTGT ATTC TCTGCAAAAA GAAATG  
TAAGGCAACTAGCACAGCACAAGTCGCTAATAAGTCGTGCAT TAAA GCACAAATCGCACTGAAGGCATAT  
CTCC ACTC AAAGCGCAAGCTAACA TAAA GTAAGATA ATTC TAAA GCTCCAAATAATGCGATGACAGCCT

GTGTACGCATTTTA TTG GAAA GCTGTCCACTTACCT TAAACCAGCTACCTCGAGAAGCATCAAATACCAT  
AGAAGTAGTAGAACTTCCG GAAT CAGACAATACTTGAAGA ACTC GAGCAAGATGATA ATCCG ATCC TTTC  
TGTTCTG ATCC AGCTCCTTCTA CAAA CTCAACTC TATCCAAGGC ATTC TGAGA TAAA TATAT CAAA ACTT  
TTTC CAGAACTATCTGCTCTACGCACACGATAATCTCGAGAAGATA ATCCGA CAAA TTG GAAA CGC TTTC  
CAATACAGAACACATCTGCTCT GGAT TGT ACTC ACACACATCG GAATC TAAA GTCAGTGCAT ATCC ACC T  
TTAAA ATCC ATCC CAAAAACG GAATCC CAAGCACCAA ACCC TAATCC TACACAACC TAAAACAAGA ACTA  
CTC CA GAAA ACT ACC CAAAACG TTTAC ATTCT TTTA AGAAGTTATGCTTGATCC CAA TAAA CT TATTC AT  
CATATGCAATT GGGT CTCTCTCGT TTTC TGC ACCC AAATGACAAA GAAAAA TTTC GTCATAAAA CAGGGCT  
GTGAACAT GGAT GAG GAAA ATCC CGATGATCAAAGTGAGCGC GAAA CC CAAA ATAGGTCCTGTATCTAACA  
TCAGCAGCAATGCTGAAGC TAAA ATAGTAGT TAAA TTA GAGT CAAAAATGGCACT GAATGCCTT TTTA TA  
ACCTGCTTCTACAG ACTC CGACAAGCTTCTAGTCAAAGAT ATTC CTCTCGGATTC TTTC AAAGACTAGA  
ACATTAGCATCAACAGCC ATTC CCAT TGCTAGGAT AATACCAGCTA ACCCGGAT AGAGTAAGTGGAGC AT  
CC AAAATATTGCATGGAAGCC AAAATGAGCAATAGATTC AGCAGCACCGCTATAGAAGCAATAACACCTCC  
AAATCTGTAGTACAC ACTC ATTAGTACGATGAGCACTACAAGTCC AACACAACAGAGA GAATTC CTTGT  
ACACGCTGAGA ACTTCCCAACTC AGGAGAGACCACTTCTTCACT TAAA ATTTTC TG GGATGAAGGACATAG  
CTCCAGA TTTA AGATCTGTAGC TAAA CGATGTA CTCTCTGTATGAGAAG TTTC CA GAAA CACTAGCATG  
ATC TTTC AGTGGAAAC ATTC AACACG GGATCGCTGATCACGTAGCCATCTAATACGACAGCCATACGCCAC  
CC TCTCCCTCCAGA GAAA AGGCCATTT CAAA TACC ACTA ACCC CTTCTTGGCAAAAAC CAAA ATGTCCAAG  
CAT GAAA TTGTTGCACAGGCG TTTC TCTACCGTCC GAAA AAGTGGC TTTATCC TTA ACCC CAAAA TTTAA  
AACATATCC CTCTCCTACTGCAAATTC TGGAC GGAT ATT TTTA AGAGAAGCTCCTTCTAAGGCATGATTT  
CTAAA TACAATCATGAGAGGAT TAACCTGCTCTCTAGACTC TT TTTC AATAGCAATCATTGAAT ACTGTG  
TATC TAAA GAAGCAGA ACCGCTTCTAGCTC TTTAGAAA ACTC AATCCAGCTTCTCTTAACTTCTCGAC  
TGCTACACGAACATTAGCTGGAGCTGAGCCATT ATCCC ATG GAAA AGAGCTCCCGC TAAA CGATTGATA  
GCTTGAGGAGAAC ATTC GTCCAGACTACGTGCTG TAAA CCAAAGGTAATC TAAA AACG CAAA TACTTCGT  
AACGTAGAGGGCTTCTTGAG GAAA ATTGCTC ATTC ACTACATG GAAA GACAT CAAA GAAGTCCC TAAA AT  
GTCTGCAGAAGAAA TACCTGCTGCTCCAGGAACGCTCACCTGTATATGATCACCTTCCC CAAA CATCCCT  
ACTTC GGATACCC CTAG CAAA TTC AAACGGGCATATA ACTC ATCA GAAA CTTTA TCAATCCCGC TTTAT  
CGTTAATAAGTTCCCTTGGTGATCTCG GAAA GCAATCCGAAT CTG TTTC CCTCCTACAAAATCC GTGCC  
AAACCGCAAAACATGCTCGCCTCGA GAATAT TTTC TGAT ATTC AA TTTC AAATTC TCAAAGAAA ACATTC  
TTATGTG GAAT TGCAGCTCGTAACCGAACCTGT GGATTC ATAGAACATTGCGCTTGTGCATACTGCTCAT  
CC CAACGA ACTAGCTCGGCATGCT GAGT CTTCTCAATACGAT TTTA CTACAGCTAACCGGTCACGCACATC  
ACGGACTTCAAGAGATGCCTTCCCAAAC CAAA AACAACTC TTCTCCCAA ATTCGAATGACACGTTGC  
AAAGGCTC TTTA ATCTCTAGAACAG ATCCTCTCCCAA ACTC CAC GAAA CTGC ATCC GTAT GAA TAAA AC  
ATGCATA TAAAT CAAA TAGATCATGTTG TAAA AGAGCAGCTTCTCAGCACCGGCATGTTCACTTCCG  
TACAATCGAACGTAGACC TTTAAA TACAATG TAAA CAGAACC TTTAGAAAAATGCCGACAGCTTCGCTCC  
GGCGA GAAA ATAAA GC ATCC TAAGGCATCGCTATCC AAAGGCTCCCTACCATAACAGG GAAA ATTTTC TG  
TGGATAAA TCACAAG TTTC CGCAAGAGGACG ATTC AAGACTAGTGCAGTCAAATGTTCCACT ATTC GCTG  
ACAAACTC TGTGCCCTTGCAAAACAAT TTTA CCGCTAGCCGCTCATCTCTTAAATCGGACAGCAAACCA  
AATTC CGTCTCTTCAACAGAACG ATTC AAGC GAGT AGCTATGTGCTG TTTC TCCATAGCAAACAGACGCT  
C TAAA TC TAAA CGCTCATTACCAACTA ACTGTTGACGATTAGCAGCTACTTCCGCGTC GAAA TG GAAT AA  
CAACTTCCCATCGGCAGTCAAGGACATTGAG GAAA AACAAAGGAGA GAGTTC ACTACAATCAACAACATTC  
CCTACGAC TTTA GGGCTAATC GAATTC CAACG TAAA TTACGA GAATG TAAA AGATAAGAAGCATC TTTAA  
GCTCCTCTCGAGCTTCCCTCACTTCCCTCATGTTG TAAAGCTT TTTC CAACCTTGCCAAAAAGGCTG TAAA  
ATCGCGCTCCGTCCCAAGCACCGAGATAGAAA ACTT GAGT CTTCTTGTAGGGAGCAATCGCAAGCCA  
GAACAAATGTTCCGTGTGACAT GGAT AACCT TTTC AATAGGCATAG AATCCCA TAAA GAATAGTATCCGC  
ACTC ACAAGGGCGTCTG ACTC GATAAA TAAG CAAA TTGCGAGAT TTTC TAATTC TTGC GAAA CCGTAAC  
ATC TTTA TCTTACATACGAGACAAA GAAA GATCTTCTCTGTCAAAGAAGTCAC TAAA CT TCCG GAAACA  
AA AACAACTGTCTCTCCAGTGA ACTC AGAGCTCCCTACAACATACAATCGTGCAGACTTGACAGGAACAG  
AAGGCTCGCCGTGCACTACATTATCAA TAAA TAGTGCAGCGTCTTCTGC TAAA GAAA ATGTAC ATTC AC  
AACTC CAG GAAT ACTT GGAT GCTGC TTTA TATCC CCGCGTAAT TTTA ACGTGGATAAA ATTTTC GCAACA  
CGCAGCGTCAAATC ATTC CGTGCATCC GAAA CTTGTGCGGT GAAA CGCTCTATAATCTTGCGAGCCTCTC  
GTCCATCTATT TTTC TATTC AAAGGTCGT GAAT TAGTATAGACATGTAGGTAACACATGATACAAAGCCAA  
AGCAAAAACA GAAT AATAATGCTGAGA TTTC GCT TAAA ATTACGCTTCAATTATGAGGCTCTTCGTT ATT

CGTGAATTCGCGAATGCAGCTACTTAGCCCAACGCTCAAGCAACGGGAAGGAAGATCTAGGCTCTTCAA  
AACATATATGTTGACAAAAGAAAGCCCTCTCAATGACAAGAGAAGGAGCCCGGAGTCTCCCCATTTCAA  
AACGTCAGAGACAAACAAAGATTGGAATCTTTCTGCAATTTCAAGACAACACGGTAGCTTCAATGC  
TTGTCTACCAAAACCAACCAGAAACTCTCGCCCGCGACTCGACCAGAAAGCGTTCCTGGACCACACC  
CCTAAATTACGTCAAAAAAATTGTAGCTCAGTATGTTTCAATAACGTTTATAATCAAAGGTAAATCACGAG  
TAACTGAAGACTTCTAAAAAATCAACAGCAAATGTTTCTCAAAACTGCTTACTGAATAGGCGCTTCAG  
AAGAAGCTTCAAAAAGAAAGAGCCATACGAACACGCATATTAGCTATCTGGTGATACGCCCAAATAAGCAA  
CAATGAGCCCAAATTAAGCTAGTCTGGTAAACTGTAAACACGTACAGAAAGCAAGAACGCTA  
CAGCCCAAACAAGAAATCCCTAGCAAAACGATCAATGAAGGCACTATTCGTTGCACCAATTCATTGACT  
GTACACGATCCAAAGAACTGAACTCTTTTCTTGACTTAGACGTCAAAATTGAAGATGCCCAAACAGCTGT  
AGGCAAACATAAACTCACTTCTGGTAAATTTCTATGCTTAATTTCTTGCTCATCACCAGCAAAAAAGCCGC  
TATTTCTGTCTAACTAACCAATCTATCATGCCGAATAAATCCGGACTTACTTGAAAGCTTCGAAAGCAAAA  
ATAGAGATCTAAGGTAATAACTCTTAATGAATAACAAGAGCGTTCGTCCATTTTACCAAATAAGCTGCT  
AAACCGCAACCATCAAAACAAAACCTCAATAATAAATTTTATCAAACTGATGCTTAAATATAGATTT  
TAGAAGAAGTGGTTCTACATTCAGAGGAGACTTGATAATAATCATTATCTATGGGTACCATCCCTGCTC  
TGAGTCTAAGAACCCTCTACCAGAGTCGCCACCTCTTCTACTAGCGATATGGGGATGGTTCTTAGAA  
AAAGGGGGATATGGATCCCTATAATTCCTAGAGAACAGCCAAATCTCCAGCCACTATAGAATATCAGACT  
GCGTATGTCTCTAGCTTTTGAACAGGCGACCCTAATTCAGAAAATCTTCCGCAAGGGAATTCCTCCCT  
AGACATATCGCCATCATCATGGATGGGAATCGTCGTTGGCAAAAGAAACATGAACAATCAAAATCAAAAC  
GTGCTATATCTGGCCACCGTCAGGGAGCTGATAGCAATTCACAAATTTGTTGACACGGCTTTTACACCTAGG  
GGTAGAGGCTCTTACGCTCAAACTTTCTCTACAAGAAATTTCTCTAGATCGAAATCGGAAGTCGAGAA  
TTATTTCTTTTATTCAACTCGCAGTTGCGCAGCAAGCTCTCTTTCTTACATGATCGGGAGATCCGATTAC  
GGTGTATTGGCGACTTATCGAACTTCTCAAGAATTAACAACAACATTGAGCAAGCCTCCTCCGCGAC  
AGCTCATTACTCCGCATGGAGTTAATTAACAAGATTAAATACGGAAGTAAAGACGAACCTGTTCCGCGCA  
TTCAAAAGATTACATCAGGATCTTGCAAGTAAAAAAATCTCGGTCAACGACATTTCTGAAAGACTTATCA  
GCTCCTACTTAGACACTTCTGGCCTTCTGACCCAGACAAACTTATTCGTACGGGAGGTGAAATGCGTGT  
CAGTAATTTTCTCTTATGGCAAATAGCCTATACAGAACTTTATGTAACAGACGTGTTATGGCCTGATTTCT  
ACAGCCAATGACTTGTAGAAAGCGATTAAACATACCAACAACGATCACGGCGCGGAGGTAAATAAAACGC  
TATGTTCCGATTCGGATCATAATTCATTTTTCAAAGCGACAAATGTCAGCGTCTGGTCTGTCCTACTCGATT  
CTTCTTACTTTCTTGTCTATTCCTTCTGTACATCTTTTATATCCAGCTCAGCCTTTATTGTAGGGCTTC  
TTTCTCCTCGCTTGGCAGCTCTAGGAACATATGAGATGGGGGCTATGGTTAGAATCAAGTTTCTCATTTTCT  
TTTCTACACGCTATAGTGCATTAGGATCCGCTATTTCTATTGCTCTGACCTGTCTTACAGCTCGTTGAAA  
ATGTATTTTCTCAGAGCATATAGACCTACTTCTTGGTTCCTTCTCTCAAAAGACGATTCGCTTAGTAT  
TTAAAGTCGCCATTAATAACTTGGTCCCATAGGCTCAACTGGGCTCGCGTTGTCAAAATATGCTTTATGT  
ATCACTCCCTATCCGCTTGTTCCTCCACATCAAAATATGGGCAAAATGCATACCGATCTCCAATAAGGA  
ACAAAATGGGGCGATTTTTCTTATCGCTACAACAAAAAGCTCTGATATTCAAAATGTTACTTCAAAGAAAAG  
CTCAAAAGAAAACGCATTGCACCAGTCAATAGCCGAAACAAAACAGTAGTAGGCTTCATTGCTGGTTG  
CTGTGGATCTATCTTGGTTAGCCTTCTTTCTACTCCATCTTCTTAAAGCCCAAACTGATCAGATTGCG  
GTGCTCGGATCCCTCGTTGCTTTAGTACTGTGTTGGGCGTTAGTGGATTCAAAAGAGACATTATCGAAT  
CTACGTTCAAACGGATGCACAGATTAAGAACAGCAGTATCTGGAGTCTATCGGAGGAATGCTAGATGT  
GCTAGACTCCTTGCTTCTTTCTGACTCCTATCGTTTACGCTATCCCTCCTTATCACTCAAAATAGGACATTT  
TTAGGATGATCATCACTATAGATGGGCCGTCAGGAACAGAAAAGTACGCTAGCAAAAGCAAAAGCTCA  
AACGCTGCAGTTTCTTTACTGCAACACAGGTGCCATGTATCGAACGCTTGCCCTACGCTCGCCTCCAGCCT  
GATTGGCAAGAAGTCCCATTAGAAGATTTTCTTGCTTACCTCCTTTTCTTTCTCCTTTTCTAAAAGATT  
CTCCTTTCAAGCTTTCTATGGAGATCGCCTTCTCACTTCCGAGTTAAGCTCTCAAGAAGTAGCGAATCA  
AACATCGCTCTTCTTAAGGAGCCTCTAGTTCGAGCCTACATGCAAACCTTACAAAAGCAATACGCGACA  
GTAGGGAATGTGTACAATAAAGCCGCGATATGGGCTCGAAAGTGTTCCTCCCATGCTGAAGTAAATCT  
TCTTAACAGCTAAACAGAGATTCGTGCAGAACGACGCCTAAAGACCTCCCTCAAGGTTCTTGGCTTAA  
AGAGGCTTTAATGGCAGAACTCATTTGCTCGTGACCAAGCAGATCAACAAGAGAGTGGATCCCTTGTG  
ATCCCTCAAGATGCCATAGTTATTGACTCTTCTGAATAACAATAAGCCAAATTCGGAAGAAATCCCTAC  
CCAAAATACCTCCCAATTAACATGATTTTTCTATCGCCAAAAGCCTTGTTCGCTTACTGTTCCCTCTG  
TTTTACAGAAGAAAATCTTGAGGTCGAAAGCAAGCGCTACCGTGAAGGAGCCGCTATTATTGCAGCGA  
ATCATGTTTCTTTCTTGACCCCATCATAATCCCTTAGCTTTCTCCAGGAAAATGTATCAGCTAGCTAA

GTCCGGACTGTTTCTAATTCATTCACTAACAGGCTTTTCGTGAATTAGGATGCTACCCAAATTAGCAGA  
AACGCTGGAATGCTGCGGCCTTTAAAGCTGCTCTAAAATATCTTTTCCATGGAGGGAGGCTCATCA  
ACCCCGAAGGAACCCGTCATGCCGACGGAGAAATTCATCAAGGCAAAGTAGGCGTGGGTATGCTGGCTAT  
CAAAGGCAATGTCCCTGTTATTCCTGTTTACCGTGGCAGGAACTTTCGAAGCCTTCGGCAAGAACCAAAA  
TTTCTAAGCCTAAAAGAGAACAATACTACTGTAATAGGCTCGCCTAATTCATTCCTCAAGACCTCATAGATA  
ACCCGCTATTGATAAAAAGAGAGGCTTACCAATTAGCAACTGACCGCATTATGACCAAGATCACCGAACT  
TCGTACTTGGTTCCAACAAAGGATGCATTGGAGAAAATCCCTAGTTTATAGATTCCTTATGACAACACTTC  
TTTCTTTCTGACTTCGCTATGTTCTGCAGCGATTCATCAAGCCTTCCCTGAGTTGGAAGAGCTAACCTT  
AGACATCACTCCCTACTAAGGAGCATCTAAAAGACATTATCAATGTAACGATGCAATGAACTTGCACGT  
GTATTACGCAAAATCCCTCGTGCCATTGCCGAATCGATCGTTGCGCATATTCCTCCCGCTCCTTTTCT  
CTATAGAGATTGCAGGAGCTGGATTTATCAATTTTCTTTCTCAAAAATTCCTAGCTAGTCAGCTCCA  
AACCTTCTCAAAAATGATAGCAAAATGGTTTCTGTGCTGCGTCTCTCAAAAAGTTATTATTGATTTTTCT  
TCTCCTAATATTGCTAAAAGATATGCATGTAGGCCATCTGCGCTCCACGATTATCGGAGATTGTTTAGCAC  
GATGCTTTTCTCAAAATCGGCCATGACGTCTTACGCTTAAACCATATTGGAGATTGGGGTACAGCTCAAG  
TATGCTAATCACCTATCTGCAAGAGACCTCTCAGGAGGGCATTATCAACTAGAAAGATCTCACTGCATTA  
TATAAAAAGAGCTCACGCGCGTTTCTGCAGAAGACTCTGAATTTAAAAGAGCTCCCAACATAACGTTGTAG  
CCTTACAATCCGGAGATGCTCAAGCTTTGCACTATGGAAAATAATCTGTTCCGTTTCTGAGAAAATCCTT  
TCAGACAATCTACTCGATCAAAAGATGTTGAGCTCCATACACGCGCGAATCATTTATAATCCTTTCTTA  
GCAGAGGTTGTGCGAGACTTAGAATCTAAAAGACTTGTACGCTTTCTGATGGCGCAAATGCGTATTCC  
ATGAAGCCTTCTCTATTCCTCTCATGATTCAAAAAGAGTGATGGCGGATACAATTACGCAACAACCGATGT  
CGCAGCTATGCGCTATCGCATCCAAAGATCAGCCGATAGAATTCCTTATCGTTACAGACTCAGGACAA  
TCCCTTACACTTCCAGCTTCTAGAAGCAACGTGCTTAGCAGCAGGCTATCTTCCCTTAAAGGGATCTTTT  
CACATGTAGGATTCGGACTTGTCTTGGATACTCAAGGAAGAAAATTCAAAACACGTTCCGGAGAGAACAT  
CAAATTACGAGAAGCTTCTCGATACAGCAGTGGAAAAGAGGAAAGTCTCTAAAAGCACATCGTCCAGAC  
ATCTCAGAAGAAGAAGCTGGCATATCAAGGCCCTATCCCTTGGTATTAATGCAATTAATATGCAGACC  
CTTCTCATAGAATCAATGACTACGTGTTCTCTTTCTGAGAAGATGCTCCGCTTCGAAGGAAATACAGCGAT  
GTCTCTCCTGTATGCCATGTACGTATCCAAGGAATTAACCGCAAGATGGGATTAAGATCTCTGCCTCAA  
GAAGGGCCTCTTGCTATTCATGAGCCTGCAGAAGAAGCGTTAGCACTTACTCTTTTACGTTTCTGAAA  
TCAAAAGACCTCACCCCTCAGAGAATCTGTCTCTCAATTCCTAATGACTATCTCTATGCCTCACCAATAA  
GTTCAATACTTTCTTCCGCGATTGCCATATCGAAGGATCCGATTCCTAGCAAGAAGCTCTTTATCTCTGC  
GGACTTACCGAACGAACGCTATCAACAGGTATGCACTTACTAGGTCTTAAAACCTTGAATCACCTGTAAC  
ATATGAATATTTAAGGGAAGCTCTTCGAGTCTTCCCTTAAACATACACAGATACTGCGTCTCGCGTAAA  
ACCTTAGCTCCTAATCTTTCTAAATTTCTCCTCGCCAATCAGTGTACCCCTCGATCCAGCATCTCGGTATTCT  
CAATCCATGAGGCTCCGCCTTCTGCAATGAGTGGCCATGACATAAGCAAATCCCTGCGCGCAAATCAGG  
AATCACTAAGTCTGTTGCCCTGCAAAGGAGTGGACCATGAATGACTGCGCTATGAGGATGATTCCTGTA  
GAATAGCGACACGACTTAGCACTCAACACTCGTGAATAAAATCACAATGCGCTCCCATTTTAACTCAAAC  
CTTTCAAATACCCAGACGATTCCTCATGCACTGTCTCATGGATCACCGAACACCTTCTGACTGAGAGAG  
CAATACGGCAAAAGGTTGTTGCCAATCTGTAAATAAATCCCTGGATGCACATCCGTTCTAGAAGAACACCC  
CTTTCAAAGGCTTATCGTAGAAAATTCGATCCCATTTCTCATGTACAGAGAATCCCTCCTCATCGATC  
TTAATACCCTTAAAAGAGGATCATATGCTCATGGCGCGCTTGTCTACGAAGATCCCTTCCCTGAGAAAC  
TACCGCAGCCATACCAGAAAGAGCAGCCTCGATTTATCTGGAATAATGAAGTGTCAACAGAATAGAAA  
TCCCTGACATCCAAAAATTTCTGATGGTCTTATCATTATCTGTTGTAATCTCCACGCCCTGCTTTCTGTA  
AGACAATCAAATCAATGATTTCTCACTTCAAGAGCAGCATTCCTAATAATCGTTCGTCCTTGAGCCCCTAC  
AGAAGCAAAGGATGAGGTTTCTGTTGGCTCCCACAGAAAGGTAGGGTAACGTGATGTGTGCTCCAACAAGA  
CCAAAAGAGCTGAAGCCCAATAGCCTTTCATCACTAATTACTATCTCTGCTCCAAGCTTCTTCAATCCCTT  
CTAAAATGGAATGTAGCGTACGAGGTCCTATAGCATCCCTCCCAAAATAGGAACAAAAATCCCTATAAGG  
ACAACGACGTAACAACGCTCCTAACAGCAAAATAGGAATCCGATTAACACAAAGAAATGCGGAGGAACC  
TTGGACAAATAATGCGCGGAGTGTGAATTTCAATCACTTGGCTTGTGATCCCACTCTACAATCGCCC  
CTAAAACCCGACAAAAGATCTACCGCAAAACCAATCTTCAATATTAGGGACGTTCTTTAAAATCGTTTCG  
CTGATCCGAAAGTAAGGAGGCTACAAGTAAATTAATGTTGTAGCATTTTAGCTCCTGACACGCGCACAGAT  
CTTCTTAAGACCGTTCTCCAAAAACCTTGATACCAGGCAATTCAGTTTCTTCTATTTGCAATTTCTTCA  
AACGTTACCCGGTATGCTGTTATTTTCTACGAAAACCTTATTTTCTAAAAAAAACATCTTATTAACAAA  
GAGACAATAACAAATTTTAAAAGAAACAAACAAAAATAAACCAAAATAGCAATAATAAAAACAACCTTTTA

AAATCTAAT TAAA TCGGCTGTTGTT TTTATTTAA CAAA TAGTTATGAC GAATTC TATATCAGGTGATCAA  
CCTACTGTTACAAC TTTACATCATCAACC ACTTCGGCATCAGGTGCTTCC GGAT CTCTGGGAGCTTCTT  
CTGTATCTACTACCGCAAACGCTACAGTTACACAAACAGCAAACGCAACAAATTC AGCGGCTACATCTTC  
TATCC AAACGACTGGAGAGACTGTAG TAAACTATAC GAATTC AGCCTCCGCCCCACTGTA ACTGTATCG  
ACCTCCTCTTCTCCACACAAGCCACAGCCACTTC GAA TAAA ACTTCCCAAGCCGTTGCTG GAAA AATCA  
CTTCTCCAGATACTTCA GAAA GCTCA GAAACTAGCTCTACCTCATCAAGCGATCAT ATCC CTAGCGATTA  
CGAGCCGATAAGCACTACT GAAA ATA TTTATGAGAATA TTTA TGA GAGTATTGATG ACTCTAGCACAAGT  
GGCCA GAAA ATAC GAGT GGTGGTGCAGCAGC ACTCA ATTC TCTAAGAGGCTCCTCCTACAGCAATTATG  
ACGATGCTGCTGCTGATTACGAGCCGATAAGCACTACT GAAA ATA TTTA TGA GAGT ATTGATG ACTC TAG  
CACAAGTG ACCCA GAAA ATAC GAGT GGTGGTGCAGCAGC ACTCA ATTC TCTAAGAGGCTCCTCCTACAGC  
AATTATGACGATGCTGCTGCTGATTACGAGCCGATAAGCACTACT GAAA ATA TTTA TGA GAAATA TTTA TG  
AGAGTATTGATG ACTCTAGCACAAGTGGCCA GAAA ATAC GAGT GGTGGTGCAGCAGC ACTCA ATTC TCT  
AAGAGGCTCCTCCTACAGCAATTATGACGATGCTGCTGCTGATTACGAGCCGATAAGCACTACT GAAA AT  
A TTTA TGA GAGT ATTGATG ACTCTAGCACAAGTG ACCCA GAAA ATAC GAGT GGTGGTGCAGCAGCAGC AC  
TCAATTC TCTAAGAGGCTCCTCCTACAGCAATTATGACGATGCTGCTGCTGATTACGAGCCGATAAGCAC  
TACT GAAA ATA TTTA TGA GAGT ATTGATG ACTCTAGCACAAGTG ACCCA GAAA ATAC GAGT GGTGGTGC  
GCAGCACTCAATTC TCTAAGAGGCTCCTCCTACAGCAATTATGACGATGCTGCTGCTGATTACGAGCCGA  
TAAGCACTACT GAAA ATA TTTA TGA GAATA TTTA TGA GAGT ATTGATGGCTCTAGCACAAGTG ACCCAGA  
AA ATAC GAGT GGTGGTGCAGCAGCAGC ACTCA ATTC TCTAAGAGGCTCCTCCTACACAACAGGGCCTCGT  
AACGAGGGTGTATTC GGCCCTGGACC GGAAGGACTACCAGACATGTCTCTTCTTCATACGATCC TACAA  
ATAAAAACCTCGTTATTGAC TTTCTCTCCAACCC TCATG TAAA GTC GAAAATGCTT GAAA ACTC GGGGCA  
TTTTCTCTTCATTGATACAGATAGAAGTAG TTTCA TTC TTGTTCC TAACG GAAA TTGGGACCAAGTCTGT  
TCAAT TAAA GTTCAAATG GAAA GACCAAAGAAGATCTCGACATCAAAGACTTG GAAA ACATGTGTGCAA  
AATTC TGTACAGGG TTTA ACA AATTC TCTGGTGACTGGGACAGTCGTGTAGAACC TATGATGTCAGCCAA  
AGCTG GAGTGGCCAGCGGAGGCAATCTTCCCAATACAGTGATTATCAATAA TAAA TTC AAAACTTGC GTT  
GCTTATGGTCTTG GAATAGCCGGGAAGCAAGTTCTGGTTATACACCTTCTGCTTGGAGACGTGGTTCATC  
AAG TAAA T CAAA GAGAAA TTCAAAA GAAA GCCAACGAC TTTA ATAAA ATCAACTGGGGA ACTC AAGCCGG  
GCCTAGTAGCGAAGACGATGGCATTTC CTTCTCCAAT GAAACTC CTGGAGCTGGTCTGCAGCTGCTCCA  
TCACCAACGCC ATCC TCT ATTC CTGTCATCAATGTCAATGTCAACGTTGGCGGA ACTAATGT GAAT ATTA  
GAGATAC GAATGTCAACACGACTAACACCACACCAACA ACTCAATCTACAGACGCCTCTACAGATAACAAG  
CGATATCGATAACA TAAA TACCAACAACCAAACTGATGATATCAATACGACAGACAAAG ACTCTGACGGA  
GCTGGTG GAGTCAATGGCGATAT ATCC GAAA CAGAATCC TCTTCTGGAGATGATTC AGGAAGTGTCTCTT  
CCTCAGAATCAGACAA GAATGCCTCTGTGCG GAAA TGACGGACCTGCTAT GAAA GAT ATCCTTTC TGCCGT  
GCG TAAA CACCTAGACGTCGT TTTA CCC TGGCGACAATGGTGGTTCTACAGAAGGACCTCTCCAAGCTAAC  
CAA ACTC TTGGAGATATCGTCCAGGATATG GAAA CAACAGGGAC ATCC CAA GAAA CCGTTGT ATCC CCAT  
G GAAA GGAAGCACTTCTTCAACG GGAT CAGCAGGAGGAAGTGGTAGCGTACAAACACTACTGCCTTCACC  
ACCTCCA ACCC CATCAACTACAACATTAAGAACGGGCACAGGAGCTACCACCAC ATCC TTGATGATGGGA  
GGACCAATCAAAGCTGACATAATAACA ACTGGTGGCGGAGGAC GAATTC CTGGAGGAGGAACGTTA GAAA  
AGCTGCTCCCTCGTATACGTGCGCACTTAGACAT ATCC CAAA ATGGGCAAGGCATCTCGTAAGTACTGA  
AGAGCCTCAGCTTGGCTCGATTG TAAA CAAATTC CGCAAAGAAA CTGGTTCAGGAG GAATCGTAGCTTCC  
GTTGA GAGTGTCCAGGCAAGCCG GGAT CTGCACAGGTCTTAACAGGTACAGGGGGAGATAAA GGCAACC  
TATTC CAAGCAGCTGCCGAGTC ACCCAAGCCTTAG GAAATGTTGCAGG GAAA GTCAACCTTGCGATACA  
AGGCCAAA ACTATCATCC TAGTCAATGACGACGGGAAGGGGT CTGTTGGAAGAGA TTTA TTC CAAGCA  
GCA ACCCAAACA ACTCAAGCGCTAAGCTCACTGATTGATACCGTAG GA TAAA AAGCAAAGGAGAACAGAC  
GAGCAGAACAGATAAGTTCTGCTCGT GAATGCCTAAGCCATATTGTGG TAAA CATCGTCTACATCGTCTGA  
TGT TTTCTAACC ATTC AAT TAAA GCGGATTC GACTTCCCTGTCTCCTCATCAATCGACAAGGCGCAA  
CGGAACA TAAA TTAACCTCTCTT CAGAGCAGGTC ACTC CTTAGCTAA TAAA GCTTCTTAA CAGAAGCT  
AAA TCTGTAGGTTACAGAGA ACTAAGAA GAATTC TTCATCGTCGCTATC TAAA FCC TCTCCTCCACAGT  
CAATCACATGTGTTAACAAGGAAGCTTCGTCTATG GAATG TTTA GGCACATAACATGCCCC TTTA CGGA  
AA AATTATATAGAACGCTACCGGGCTCCAC TAAA GCCCACCTCG CAAA TTAACGGCTACGCGCATATCC  
GAGGCTGTGCGGTTCTTATTGTGCGGTCATTGCTTCAACAATG ATCC CAACTCCTCCGA ACCCATATAATT  
CATAAGTGACTTCTTCATAATTC TTCTGATCTGCAGAAGAAGC TTTCTTTA GATTACGTTCAATATTC TC  
ATTAG GAATATTC TGGTCTTGGC TTTCT GAAT GATCATACG TAAA CGAGC ATTC GA TTTCCGGATCCGGC

CCCCCATTTAACTGCAGAGATCAACTCCTTAATCGTTCGAGAAA AAATCTTCCC TTTC TTGTGATCTG  
CTCGTTCTTTTCGGTGTTTAGTATTGGCCCACTTACTGTGTCTGCCATGC TTTC TTACCTATCGTACAT  
CTACTATCAGGAAA CCCCTGACAAATTATTTTACC ACTCTGTCCGCAAACAC ACTCTATGTCTGAAA CAG  
GATCC CCAAAAAAGGGCGGAATTT TTTAAAAACAAAGTCTCAATA ACCCAACCATCTTACACAAAAGCA  
AGTTTCAGCTCTATG GAAAACCTAGAGG ACTCTCTCCATCGTAATTTCAAAC TAAA TACCCCAACTCATCC  
TTATA GAAA GTCTTCTGTCTTCCCTACTTCCACAAATCCAAATC TTTC ATATAGGTGAATAGCAGGATTCC  
CTTCATACTTCTAAA TACACAAGTTCTAAC TTAACTGTGTCTTTTCCTAGATGCAGTAAGTTATTCAG  
AAGAGCCGTGCCAACGCC CAAA TTGC GAAACT TTTC TCCTACAATGATCGACAACAAGCTATGATGTGCG  
ACCTTGACATAAGGATGAGTATCAACGTAGCTACTC CAGCAACTTCGCCATTGTATACCGCCGT TAAAC  
TACTGCGGCAGCGA TAAA AACTAA ACCA GAAATTCACACTATCAC GAA TTTC CGTCTGTGTT TTTAAA GG  
AAATCC TCGAAGAATTTCAAAGATCATTC AACCAAAGACGCATATAGTGTGCATCTTCAGGAACCGTATAC  
CGAATCTCTAATAATGGATCACGCATAGTGGTCATGTAA TTTC TCCATAATCAACCAGGTAGGC CAAAAT  
AAAAGCATCTAGAAGCTCCCCATCCATCATTGCTTGGATGTTGCCCACTTCATATCCAGTCCCTTACATCT  
TTCACCAGCGTATAAGGCTGAAA TACATAATTACGAATCTGAGATCC CCAGCTGATTTCTTTT TTTA TTTT  
TTC TATCTATATTC TG TTTCTCTAAA CGTCTTGTAAACA ACTTCTGG TAAA TCC TAGCGCGCAGCATATT  
CATACAAGCTTCTCGGT CAAAAACAAA ACTACGCTC ATTCTGACATGACACTACAAT TCCCGTAGGGAAG  
TGTGTAATCCGTACCGTGAATCTGTTACG TTTA CATGTTGTCTCCAGCTCCGGAAGAACGATACGTAT  
CAATAC GAATATCTCCGGGATGGATCTCAACTTCTAT TTTA TCATCAATCTCTG GAAA CACTTCTACTGA  
TGCAAAACTAGTATGCCG TTTTC GCATTGCTATC GAAA GGAGATATGCGTACCAGACGATGC ACTC CGCTC  
TCTGC TTTAGCATAGCCGTAGGCAT ATTCACCGACGAGCTTCA GGGT GATATGCTTAATCC CAGCGACTT  
CCCCATCCAATCGATCGATCACTTCTACCC TCCAGCTATGACTACTAGCCCATCGCATATACATGCGCAG  
CACCATCTCTACCC AGTCAACAAGATTCGGTCCCCCTGCTCCTGCATTAATGGATA GAAAACAG GAATTT  
CGATCTAACTCACCAGAAA GAAGTCTGAGTGT TTTCCATTCTGTTAT TTTCTTTTCACAAAAACAAATT  
CTTTTTC TAATTC TTCAAACATTTCTAAATC TTTA GAAGACTCTTCATCTTCTAAA AAGAATTGTATCGT  
GGAAAC CAAATTT TTTAATTCAT TAAA TTCTGATAACTGTTGT TTTA ATCGAGCGATCC TTTTCG GAAAT  
TTCCTGACGAGCAACATCGTCCAAAAACCATCTTGACCCGCTGCTGTTCCAATTCCTTTA ACTCAT  
TTTC TTTTCCTTCCGGGTCAAAGAGACCTCC GAGT TAAAGCCAAACCTTCAAGCAAACCTTCCAATCGC  
AAATCAAATTTCTCATGCATAATCTTGCTAACC TTTTC GCAAATATCC AACTTCAAACCTTCTCTT TTTCAA  
AGAGCTAT TTTTCCTTGCCAGTTAT TTTCCACTATTACGGTGGCGGTGACAGC TAAA ACACGCTCATGGTAA  
CATGATCTTCTCTTAGGGATCAATTTTC TTGCGTAATAGTCCGAGGAATAAATCGT TTTCTAATTCGCTTT  
TACCTCTCTTCTTGCTGAAGACTTGCTATGTTT TTTAT CAAAACGATAAA CCTAGTTAAGGCA TAAAAG  
AGTTGCGAAGGAAGAGCCCTCAACT TTTCTTATCACCTTCTTTA ACTAGGAGT CATCCATGAGTCAAAT  
AAGA ACTCTGC TTTTCATGCAGCCTGTGAACGTATCC GCTGATTTA GCTGCCATCGTTGGTGCAGGACCTA  
TGCCCTGCACAGAGATCATTAA GAAA ATGTGGGATTACATTAAGGA GAATAGTCTTCAAGATCC TACAAA  
CAAACGTAATATCAATCCCGATGATAAA TTGGCTAAA GTT CAAA GAACT GAAA AACCTATCGATATGTTT  
CAAATGACAAAAATGG TTTCTCAACACATCAT TAAATAAAATAGAAA TTGACTC ACGTGTCCCTCGTCTT  
TAAGATGAGGAAGTATTC ATTC TTCAAATTCGTT CAAATGGGTATTACTGTATC TTTAACAACATCTT  
AGCAGCACCTCT CAAA ACATGGG CAAA GGCCAATCACTTAGAGCCTAACCTATTGAGAGTAAACGCTTTA  
AATTGGAATCTGCC TAAA AAA CAAA CTCATCTTCATGGGCTTCGCATTGTACAGA TTTCCGGATTTA CACC  
TAAA CCACTC GACGCCGTGATGCC TTTCTAAAAAAGTATCTCGCAAGATCTCTCTC TTTCTCCAGATAT  
TCTTGTA TTTACAGGAGAC CAAA TCTGTGCGGC TAAA GTAGAAA CTCCTGAAA GAT TAAAACA TTTCTA  
TGTTCTCTGCATGCGCCCTTAGGCTGT CAAA CTGCTAG GAAA TCATGATTACGCCACCTACGTATCCC  
GTGATATTCACGG GAAA ATTAATACCATCTCAGCAAT GAATAGCCGTCC TTTAAA AAGAGCT TTTA CCTC  
TG TTTATCAAAGTCTATTCGCCTCTTCTCGCAAT GAA CAAA CAGAT ACTCTGAATCCACAAATTCCTAAT  
CCACATCTAGTCAGTATATTACGCAAT ACTCCA TTTCAATTATTGCATAATCAAAGCGCGACAC TTTCCG  
ATACAATCAACATCGTGGGATTAGGCGATTTT CAAA CCAAACAATTC GATCCAAAAAAGCT TTTACTAA  
CTATAATCCACGTTACCTGGTATATCC TTTCTCATAATCCCGATACGATTC ACCATCTCCAAGATTAC  
CC TGGTGATGTTGTT TTTCCGGGCACTCGCATGGCCCTCAAATCTCTCTTCCCTGGCCTAAG CAAA CCA  
ATACGATAACCAA TAAA CTTTCGGGT TAGAAA ACCAGAGCTAGCTCGAGGAT TATTCTC TTTCCCTGA  
AGAGAGT AGGCTCTTGTATG TAAA CCGAGGACTAGGA GGAT GGAAGCGTATACGAT CAAACTCCCTCCA  
GAGA CAAATTTAATGAGGTGCCTCTATGAACCTTAGTTGTTCCCTCGTATTGTTAGGAGGAGG GAAA GGC  
GAGCGT TTTAATTC CCTCCAACCAAAGCAATACACACATC CAAA TGGGGAGCCGCTAATTC TTCATGCCT  
TACATGCCTACCAACGCCTACCG CAAA TTCAAGAAGTGGTTGTTGTCTGCGAAGAGCAGTACCGGGAAC

ATTTC TCCCCTATTCTG TAAAA CAAA CGTCTCCCGGGAC TTTA CGCCAAGATTCTGTTT TTTCTGGATTA  
CAACAAGTT TTTA CCC CTTGGGTATGTATACACGATG GGGTTCGTCCC CAAATCTACGCGGACGAAGTCA  
TTGAAG CAAACTCCGCTGCACGCAAACTGGAGCTGCAGC TTTA GCTTCCCCTGCAACGTATACTAT TAA  
ATCATGTGC ACCCGTTTCGCACCTTAGATAGAGATGC TTTAGCAGTTATCCAT ACTC CTCAATGCTTAGAT  
ACAGAAGTCTTGAGAGAAGGACTTCTCCTTGCCCGCGCTAT GGA TTTCTCTCTATCC GATGATACAGAAG  
CTGCT GAAT TACTC GGCATAGAACCTACCTTAGT ATTCAGCAACAGAGTACAAATCAAAGTCACTTATCC  
CGAGGACCTCTTATTC GCA GAAA CTC TTCTCTCCAAGTCTCTACCTA TAAA TAAGCCTTCCCATGACAA  
AAAAAATTGT TTTA CAAATCGCTTATCAAGGAAC ATCC TACTC TGGATGGCAATACCAACCTAATGCCCT  
TTCTATCCAAGAAGTCT TAAAAACAATCC TAAA AAAATAGCAGGC TTTTCGCA TTTCTGTAATTTCTTCT  
GGACGTACAGATGCTGGCGTGCATGCTCAGGGCCAGATTGCTCA TTTTCATTGCCAGACCATCCACATT  
TCAC GGATCC CAGACAA ATCC AAAAGATGCTCAACGCCCTATTACCTCATGATATTGTCAATTC GCGATGC  
TGTCATGACCGACGGAGA TTTTC CATTCTAGAT TTTTC TGCCATAGCCAAA GAATATCGCTATACGCTATCT  
CTACTTCC TAAA CCTCTCCCTCATCATCGCT ATTC TGT TTTAGTCCCTCGTTA TAAA CTC AACATAGCGC  
GTATGCAAGAAGCAGCTCAATACCTTGTAGGCACACATGAT CAAA CTTCT CAAA CGAATCTAGGAAGAGA  
GTACTC TTCTACGATACGCACTC TCTAT ACTC TAGA TTTATCAGAACAAGAGCATCTCGTTACTGTCTATA  
TGCAGAG GAAA TGGC TTTCTTTA CAAAATGGTACGCAATATTGTGGGAGCTCTTCTCGATATAGG GAAAG  
GGAAA TATCC TCCAGAACATCTTCTCGATATGCTAGCAACC AAAAGATCGCCGCAAAGGTCTCTCTCAGC  
ACCTCCGTACGGACTATC TTTA CACCACGTATGCT ATCC TCCCCCTATCAGTGGTTCTGCAAGCATGAA  
CACAATA ACTC TAGCGAAGGGGAAGTAATAAT ACTCC TTTTC CAGG GAATAAGGACTGTG CAAA CTCTAGAG  
ATCGTTCTGCATTGATAGCTACCATAGTGGCTG GGATTC CGGCTAATGCCTGCAATCC TTTTACACTATC  
CTCAAATCC GATTACGTGATCTCCTTCTTACAAAACGATTC CATGCTAATCGATAGCTATCC GGGGCA  
GG TTTAGGACGTGCAT ATTC TTCTCTAGTTATCC AAAATTGCATAC ACTCTAAA ACC GGATGTTCTTAC  
GGATGCGTAGCGTAG ACTCTTTA GAA GAGT TGGTTACAAC ACCC AAACAT TTTCTTCCAATAAGGAGAG  
AAACG TTTTC CACACCAGGCATCAGCTGTATCTGCTCACAAGATAGGAGATCATGTAACACCGATCTCTA  
TCTAAA AAATAACTTGG GAAA AAGGCTCGTG TTTTC AGGGAACAGCTGTATCAAAGCCTCTT GAAA TCGTT  
CCCTCCCTTGCATCGC TAAAGAAT AATATTGGC TAAA AGAGAGT TCGACAGAGACCTTATACTTCTGCCA  
TGCTCT TAAACAGGCTTGATAAAA TAAA GGCTCGGTATCAATTAATAATCC ATCTAAGTC GAAA AAATAT  
ACCTCATAAGAAT CTAGACGCATAGCTTCTCTCTCCTATCAGGGAT GAAAGTACTAGATCTTGTACTTT  
TC TCTAAC GAATATATAAGCCTT TTTTC CATTACGCG GAAAC TTTA TGAACCTAAT ACTCCTCCTTACGT  
TATGCTATCGAGCCT TTTATCAGGGT GCTCAACAGACAATCGCCAAACCTCTTATATCGAGGCAGCCCG  
CATCACAACACAAAGCTCAGGCTCACTG ATCC TTTA CCCC GTGATCGAGCCTCGCTCCGCTCCTACATAC  
CACTGGCCT ACTCC TAAA TCC CCGGTCATTACAAACTACTC TTTTC CACTGCCATGGCACGTCTGGATCAC  
TATCTACAGAA GAAA CGTTGTCTTCGACTGCAATG GAATCAAACACCTAGCCAA ACCCTTTTCTATTCA  
TCCACTC TAGTGACTATTGCACAATAC ATTC ATCATCACTTCCCTATTACTATTGAAGAGGGATATTGC  
TGTCCTATGCACTATAAG TTTTC TCCTAACTTC GGATAC ATCC ATATCC GAACAACATTGCAAAGG TTTAG  
CAGCAATAGTCTCT ACTC AACAAACAGTATCTCCTCAAATGCTGGCTCCT ATTC TCTCTAAGCTGTATAG  
AGGCTTGGCGCTTCTTTC TAAAAC ATTCACCC TCTCTCATAATACA ATTC AAAATGAAGAT TTTA TCATC  
ACCTCTACCTTCAAAA GGGTAAA CCTGTGCTGGTTATTGAAGTTCATCAT GAG TAAA TACCTCTGCTGA  
GCGTAT TTTCTTAACAAAAAACCTTCTCTCCCTTATAC CAAA TCCTCTTAA GGATAT TTTCTGTGTCAGG  
GGAA GAAACTCTA TTTCTTCTTCTGT TTTTCAGACCTAGATGGTTATGCCGGCGTGCCG GAATGGTAGACG  
CGGTAGACTCAAAATCT ACTC TTAGCAGTAAGGTGTTGGTTC GAGT CCAATCGCCGGCATTAAATCACATT  
TCATGATTTATATTGCTAATAATTC GTAGGACCC TTTCTT GAAA GAGAACGCGAACAGGCAACTCTTTT  
ATGAAA GAATCC GCTCTTCTCCC TTTATTGAAGAAA AAAAAAGGCTT TTTCTTATCAATCC TTGATCTAA  
CTCAAGTCGAAGCTTCGCTCTCTCCC GAAGATCTCAT TAAAGTATTACGGCAGAAA AAAACTCT TTTATC  
TTGTATAGAGAAA GTCGACCATCAAAT TAAAAA TTTTCGGGATAG TTTCTC TTTAGCACTTCCCAAGAA  
GTGCAAGAAGAACTGGAA GAAA TCC GATCTGTT ATTCAGCGCATTC TAGAAA CAGACAAAAAAACTATT  
GTATAA GAAA AAGAGA ACTGGGAAC TTATGCCAAAAATCGACACTTGTGATTC TTGCG TTTTC CAATACCG  
AACT CAAA GCCATTC GTACGC GAGT AACACAATCGTATAACGAAGCTCAAACC ATCC TATCTTCGATTC  
CGATGGCATT TTTTC TAC TTTCT GAAT CTGGAGAG ATTC TGA CAAA CAATCC CCAAGCCCGGCTAT TTTA  
GGCATCC CTAAGGAC ATCCAGCTGGTACACGGAGGTTCCATGATTT TTTTC CCGGATACTTTT CAAA GAT  
TCTCAGTACAAGAAGC TTTAGAAA AAGAAGTCCCTCC TAAA ACG ATTC GACTAACCCTATCTCAAGA ACT  
CTCCCAAAAAGAGGTAGAAGTT CAAA TTAG GAAA AATATCTCTCACGGCTTCCCTTCTCTCTATCCGC  
GACCGGTCGGACTATAGGCAATTAGAACAAGCGATT GAAAAATACCGCAGCA TTTTC CAGT TAGG GAAA



TAGCTGCAACTCTAGCACATGAAATCCGTAATCCCTCTAACTAGTATTTTCAGGATTCGCAACCTTACTGAA  
AGAAGAGCTCTCTTCAGAACGCCACCAACGCATGCTCAATGTCATCATAGAAGGTACTCGCTCATTAAAT  
TCTCTTGTTTCTTCTATGCTTGAATATACAAAATTC AACCTCTGAACCTTCGTTCTATAGACCTACAGG  
ATTTCTTTCTTCTCTCATTCCAGAACTCTCTTTTAACC TTTCCTTCTGTACA TTTAGAAGAACCATCTT  
ATCTCCTATACAGCGCTCTATAGATCC TGATCGCTTGCATGTGTGATATGGAACCTTG TAAA AAATGCC  
GTCGAAGCATCGGATGAA GAAATC TTTC TAGAACTACAT GAAA AAGGT TTTC CGTTATCAATACCGCA  
CTCTTCTCCTAATATCC AAGAAA AGCTT TTTATTC TTTC TTCACTAC GAAA CCTCAAGGGAACGGTCT  
AGGCCTAGCAGAGGCTCA TAAA ATCATGCGCCTGCATGGCGGAGATCTGGTTG TTTC AACCCAGGAT AAT  
CGTACTACC TTTA CCATCC TATGGACTC CTGCTTAAGAGCAGTTATCAAATGCAAAAC ACTCACCTCTGA  
AA AACCC CATGTGATAGAACACATTC TTATTATTGACGATGATCC CCATATCC TGGCTCTTC TTTC TGA  
GATACTGGGCGCTCGGAACT TTTC AGTGTCTTCTGCTCCAGGAGT CAAACAAGCTATTAAGCAGATCTCT  
AACTGTCC TTTC GATCTGATTA TTTC CGATAT GAAT ATGCCTGATGGTTCAGGAT TGGATATTATCCAGT  
ATACAAAACAGCATCGTCCGCAAAACC CTATCTTGGTCATTACTGC TTTC GGAAC TATTC AAAATGCTGT  
TGAAGCTATGCGATTCCGGAGCT TTTA ACTATCTGACCAAACCGT TTTC CCCC GATGCCCTT TTTAC TTTA  
ATCGC TAAAGCCGAAGA ACTC CAAGCGCTACAACAAGACAACCTA TTTC TACAATCACAAGGATCC TCCA  
TCTCACATCC TCTGATCGCC GAAA GTCCTTCCAT GAAA CAGCTACTTGATAAAA GTCGCCGAGCGGTAA  
CAGTTC TGC GAAT ATATTC GTACACGGAGAATCCGGATGCG GAAA GAAAATC TTTC ATTT TTTATCCAC  
AAGCACTCCCTCGATCTACTAAGCCCTATAT TAAA GTCAATTGTGCTGCTATCC CCGATACCAA TTAG  
AATCTGAGTT TTTC GGGCAC GAAA AAGGAGC TTTC ACAGGAGCAACCACGAAGAAA GTAGGAAGA CAAA  
ACTCGCCACCAAGCACTCT TTTA CTAGAT GAAA TCACAGAAA TTC CGATCCA CAAA CAAGCCAAACTC  
AAACGGGCAATACAAGAACAAGAATTC GAACATATGGAGGAATAAAA AACCC TCCCTG TAAA CATTCGAT  
TTC TAGCCACTTCCAATCGTGACCTTGAGGAAGCTATT GAAA CCAAAGTTCTCCGTCAAGATCTCTACTA  
TCGATT GAGTGTGATCTCT TTTA CACATCCCTCCCTTCGCGATA GAAA AGAAGAT ATCCCTCC TTTAGCT  
CATTACTACTTAGAAA AAT CAAA TAAGAT GAAT AATAAGCCTCCAAAACATTGTC TTTA GAAGCGCAA  
GAAA TCT CAAA GACTATTCATGGCCTGG GAAT GTTCGAGA ACTC TCTAACGTACTC GAACGAACGT TAT  
TCTAGAAAACGATCC TGCATC ACTC CTTCTATGCTCGCTCTCTTATAATGATTC TTAACAGGAGTT TTT  
CTTGTA TTTCAAGAGCT TTTC TGGTAACCTTGGGCCCTTCTTGTGCACCGATAGCTCAACTGGATAGAG  
TACCTGGCTTCGGACCAGGTGGTTGGAGGTTCGA ACCCTCTTCGGTGCATTC TC TAAA ACTTCT TTTC  
AATTTT TTTATTC TAGTATAAGCG ACCGTTATAGCTCGCTAATCACAGAAGTCTT TTTAATCC TATGAG  
CACCCCTCCTACAGATGCGCATTGTCTCTTCGATCC TATTC GCTG TAAA CCCGTCCCTCC TTTC CCGAG  
GAGCAGTTAGACAGGC CAAA CTCTCG TTTC TCATCCAAGAGCTCTCCT ATCC CCAACAACAGATCAT TG  
TG GAAA AAG GAAT CAAATCTTGT ATTC CAGCATC ACTC CCGCCTCTCC TAAA AAAATGCGAGGAAGAGC  
GGATGTACTTATCC TATCTCCCTCCTCTACGTCTCTCAGAAGGTGCTTCTA TTTC TTTTC CCCATCCCT  
CAGCCCCTACTATTAATA GAATG TAAA GC GAAA ACAGTGACCTCTCTCTCT TTTC AGTCAATTGATTAGCT  
ATAACTAT TTTA TCGGGCCCCCTGTCTATCTAATTAGCGCAA ACTCTCAGCTCACAGGTTT TTTATC  
CCCAAAGACAAAAC ATTC GCTT TTTA CCAAG GGATTC CTTCATATTC TCAACTGATGAACCTCTATATC  
CATACAT TTTC ATGCAAATCACCC TTCCCGGAGT TGTTCTAACAAACTCTCCCGCTGAGAAA CAACATGT  
TATCG TAAA AAT TTTC TCGCCAGCAGGGCTTC TTTC TGCCTTCGCAAAAATGGAGC ATCC CTATCC TGC  
GAT TTTC GAGAGT CTCTGTTCCCA TTTC TTTA GCCT TTTC ACGATTC AACAATCTCCTCCAAAATGC  
GAAA AGTCATACAGGGGGAGCTCCAAAATCC TTTC ACAACGAT TAAA AGTTCGT ATCC ACT CAAA CAAAG  
CGCAGG GAAA ATGATTC AAGCGATTC TCAAAACGCAATGGCAT GAAA AGCCCTCTCCCATCTCT TTTC  
CTTTT TTTA ACTTCTTCAAC GAATTC CAGAAA CGCAATACCC TAATTTTT TTTC CTCGATGTTCCCTAC  
TAAA ACTC TTACAACATGAGGGAAGCCTAGATCTATCGCGCTCCTGCACCTTATG TAAA ACTTCTTAGA  
ATCTTCAACTA TTTA CCGTTATGAAGGAGCTCTAT CAAAT GAAA AACATGCTCATGAA GAAA CGATCTCC  
TTCAGCCAAGAAGAAGACCATAT TTTA AGAGT GATCGTACAAGCAAAAAATTC CAAGAGCTCG CAAATC  
TAGCAG AATTC CCTATCGACATCGATACAAAATAGATGCCCT ATTC TCCTCTTCC TTTCAGAAA ATC  
CGAGCCTTCTTCTATATTACAAAGG GAAA ACGCTTCTCTAACGGA GAAA AATAACTCCTCCATTACGA  
GTCTCTACAT GAAA AGTTAGCGTCACAGGGGATTC TCCTACCAA GAATTC GAAA AGT TTTC TTCCAA  
AACCTCTTCTCTCTTGATTAGTG ATCC CTCTGCAACTAC TTTA CTATTCATATCAACCTGCGTATAGAC  
AACTACACCAATGTC TTTAGGTAACATAATTGTAATTGGCTCTTGCTCATTAC GAAT TAAA TAGACGCA  
TTC TT TTTC CACTC CCCTCGAAAATC TAAATCCATTC TGCAGGAGGTACAAGAAA GATTTA CAGAAGACA  
GTTCTGGAC ACTC TCCC TTTA TTTTC GAACGCAGCAATCC AAAAGATCCCTTA TAAA CCACGCTCTCCAA  
CTTAGGGAAGCTTCCCGTCACATCAAATTGTACACGTTTT TTTC TTTC TGCAT GGATTTCC CATAG TTTC

ATATCTGGATACTGCCAGAGAAAACAAACCGATCCATAAAAACTGCTCTTCTTCCGCAAAGAAAATGCG  
CGCCGAAAGCGGGTAAACTCAACGTTCCGAAGATTGTCAACAAACAACTAGTATATGCACAATAACGCC  
TCTCTTCTCCATCACGAAAGAAACAAAGCTCTACGCATGCACAACGAACCTATGCAAGCAAAAACCTACCG  
TCAGCATACTAGAAAATAAAAGATTATCAAAATGAAAAGCAAAAAGAGGATCTGGATAACAAGGAAT  
CTTGCAAAAGAGGGGACTCGAACCCTAAGGAAAGCTCCACTACCACCTCAAGATAGCGCGTATAACCAAT  
TCGCCACTTCCGCAAAAAGAAGACATGAAGAACCAGCTTACTCTGATTGGACTCTTTACTACAAGTAA  
AAAACCTCTCAGCTTACAAATTCCTATCTATTTTAAAGAAAATAATGGAGGGTTTATCAGAGAAAACTCT  
TATCCCTCTATCTCAGTATCTGCCCATACTCAAACAAGTCTCTGCAAAGGTCCTGCAAAGCCTAT  
CCCTTATTGTAAAGAACCACTGAATATGAGACACTCTTCCTTTC AACGATATAGATGTAAATTC TACCA  
TGCGCTGTTAGCTTATTGCACTGCTTCCATCCATCACTTGCACGTGCTCTTTCATCTTCTAAAAGTAAA  
CTACCCCTCAGTTCTATCCCGAGAATACGTGCTGATTTCTCAGAGGAAGTATGAAAGCGACAAAGCT  
GCTGTTTCTTCCCCCAAAGCGCAACGTGTTCTGGGGCTGGGAAAGAACTGAAAGAAATACAAGTGATCC  
GTGCTATCACCCATCTGCAGTCAATCCCTTCCCAACCCAGAAAATCGATAGTTACGATTTTCATTACGG  
AGAGAACTCCAAATCCGTGCGGATAGGCTGGTTCTGACTAACTCGAACATAACAACTTGCTATT  
TCCCAAAGATTAGCTCAGTCTATCAAGCTTACAGTTTTCGAAGAAAAGATTTACAAAACGGTTGAAA  
CGAAAATCTCTTCCCAAGAAGTACTTCCAAAGGAAAATTTCTCTATCCCGTAAACGATTGCAAAAA  
AATCGGGAACTGTTCTAGATAAAAGCTTCTGTGAACCTACACTCCGATATCCCTTGATGAACCAGA  
TTCTGGGAACATCCAGAACTCAACCTTTTTCATCAATGTTTACCTGCCTAGACGTCAATGCTCGCG  
TAAACGTGCTGAATCATAGACTTGCTATCTTAGGGGACGTTCTTGAATTC TTAATGACCAAC TAA  
TCAACACTCCTCCGCTTTTAGAATGGACCGTAATCTGGTTAATCGCTCTAGAAGTGTGGTCACTACTG  
AAAGACGTGTTTACATCATATAAAAGTTATGCAAACCTCCCGGATCAGCTCTTTTTC CGAGGGCTTGT  
TCACCTGTACCGTTGGGCGATTTCTCCTTTTC TCGGGGCTCCTGTGCTTTTTC CCTACATGCTCTGAG  
TACGCTCTTGTGACATAAAGAAACATCCGCTCAGAAAAGCCTTTTTCATCGCCAAGCGCTTACTCA  
AATGCGGCCCTTGGTGCATAGGAGTATCGATCTCGTCCCTAGAACTTCTGTTGAAAGAAATATCTCAGTTC  
CCCTACCCCTCTAGCAGAAATCCCTGACGACAGGACTGTGCCACACACCCCAAGAAAATCTCTTAGTATAGT  
GTGCCTCTCTAGGCAAAAGTTGAATAAAGGATGTAAAATCGCTATCAGAAAACTCATGCAACACCCAGTC  
CGGTCATGTACTAACAAGAGAAGAGCTGCTAAAGGTTCTGTCTATCCACATAAGCTTTCAGAAAACAG  
CGCCTCTGATGATCAGAAATCGCCGCAAAACGATTTCTAAAACACAGGAAAAGAAATAAGTCTTCC  
CTCCTTGGATAATCATTTCTTGGCAGAGAAGCGACCGAAGCAGCTTCGATTTTC CGCACAAAAGGAGAGA  
ACGCACATAGAGAAACTCAGGAAGATGACAAAACCGATACAGAACATCTTCATCCACCACCCCTGCTTCA  
CAATCAGCACCATAATACGAAAAAAACCTCGTGAAGAAGTGGAACTCTCTGTAAGCAAATACTGAC  
AAATCCGTGTAAACTCTCTGATCATTAATATCCGGAAGTAACCAAGTACGTTACAGACTCAAAAGTTTAA  
AAAAGTTAAAGGATCGCTCAGCATAGGAGCGATATCTACAAAATTTCAAAGATGCTCACCCCTAGAGCC  
CAAGATTTTAAATGGATGGCCGAAAACCTTCTCTCTGCAACAAGGCTAAATAATCGGCAAACGAAG  
CATTTCTAGTCTTTC CAAAATGTCTCAGGAATCTTCCCTATTCGTGAACCTTTAGCGGATGAGATTC  
TGGAAAACCCCTTAAATTTATAAAATATCTTTCTAAAATACGGTCAATAAATCAAAGCAGTAATAGGATA  
TTCACAATAGAATAAGAACGAGAGCTTGCTTGAGCCATTTAATCGTTTTTTTACAAAACATAGCTCCTG  
ATCCCTCTCCTCTATCCCAATAAAACTCCTACATCCCTCTCCCTCAAATACTTGCTACTATACACGC  
CACTTCGTAATACTACCAAAAAAAGCTGCATTTACTCATGCTCGTTCCTTATCCCTATTACAAAAT  
TCTTCTCTCTCCTCTCTCTATTGAGGAAATTTTCAAGCCTGTGATCGTATTGAAATCGAAGCGGAATG  
CTCAAATGTTTTTC CGGATTCCTTAATACTGTTGTAACAGGAAAATTTTAAAGTGCCTCTCCTCATCCT  
GATGCAAAAAGACTTACTGTTGCCATCGTTCAAAACGGGAAGGGTAAGCGCCAAATCATCTGTGGAGCTC  
CCAATGCCGAGCAGGCATCATTGTTCTATAGCCTTACCAGGAGCTAAGTTACGTAATGCTTCGGGAGA  
AATCACTACAATCAAAAAGCTAAAATTCGTGGGCTCGAATCACAAAGAAATGTGTTGTGGAGCAGACGAA  
TTAGGGTTCCCTCAATTA CAAAAGCACAGCGTGGTATTCAAAAGTTCCCTGCAGATACTCCTCTTGAG  
AAAATGCTGCTGCTACTTGTGAGCTTCCCTAGAAATGCTCGTTAACCCCTAAATTTAGGCCATTGCGC  
ATCCCTTACTAGGCTTAGCAAGAGAAATTTCTTTCATCCCTGTATCTCTTAATATCCCGGAAGAAATTT  
TCTCAAACCTCGCTTCTCAAGAAAATTTCTCAAATGATATGCACGATGCTGGAGCTTGCCCCGTATTCT  
ATTCGTCAAATCTCGGGTCTATCTTGTGACGATCCCAAGAAATATCTGCAAGCAGCCTAACAGCTCT  
TGGACAAAACCTCTTAACGCCATCGTTGATATTACGAATATGTGATGCTGTCAATTAGGTCAGCCCTA  
CATGCTTACGATAGCCAAGCGGTGGAGCAAAAGTCTCTCCATGCAGCTACTCTACAGTCAGCTCAACCAC  
TTACTCTTCTAAAATCAAAGAAACCTATACCCCTCCCGCAGGATCTTTAGTCTGTTGCTGATCAGCATAATAT  
CTTAGGATTAGCTGGGT CATGGGAAGTGTGCATCTTCTTGCTCAGAAAATACAACAAGAAATCATTCGT

GAAGCCGCTTACTTCCAACCTCAGGCTGTAA GAAA ATATCAACGCACGATACAGCTGCACACAGAAGCTG  
CCTATAGA TTTA CCC GAG GAGTGGATCC TCAAGGCGTATTACCAGCGTTACATGCTGCT ATCC ATATGAT  
TCAATCTCTATTTT CCGATGCTCAAATCTCTCTCT ATTC AAAAAATGGAGATGATAGCTTT TTTT CCAA  
TC TTTA AGCGTTTCGCC TAAAACGAT TAAAAGACTTCT GGAT ATTGAGCTCTCGACCGCA GAAA TAGTTG  
CCAAACTCT TTTCTTTA GGATTTT AAACAGCAGTAGAAGAGCAGGCCGTTT GAGT CGAGGTCCCCCTCTTA  
CCGTCATGACATTC AGGAAGAGACCGACCTTGTGAAGAGATCTGTGCGACCACACC ATTC GTTCAAAAA  
ACACAAAAAAT ACTC CCGACCTAT ACTC CGATCT ATTC CAAAAA CGTGA ACTC ACAGC TTTT TTAGCAA  
ATGGTGGGCTACAACA ATTTCTTTA CTTGCTCCTTGCT GGATACAGAAGTATCTTCCTTATC CAAA CAAGA  
AAGCTC CAAAATTC CTGTACAGAATTC TTCCTG GAAA TTACGCG ACTC CTTTCTCTCG GGATGC TAAAA  
AGTGCGGCTACTAACCTCCATAGGCAAGCCCCCTATG TTTA TGCT CAAAAA TTG GAAA TGTGTACTCGA  
AGGAGCAGAACCGTTACCAAGAGGAAGAGCGTGTGCTAT TTTA CTC TCTCGCCAAGTAAT GGATGATTC  
CTGGCAAGG GAAA ACACCTCTCTCTT TTTATACAATCAAAGGATGGGT GAAA AACTATTATGCCAGTCA  
GGAGCTTCTATAGAAGACT TTTT TCTTCAACCC AGCCAGCATCC GAAC TTTT ACCC TTATCAGCAAGCTG  
CCTTGTATCA GAAA AAACATCTATTAGGCATC CAAA GGACGTTGC ACCCACA ACTATGTAGAAA AGCTCA  
GATCAAACACGATGTAGTC CAAA CTGAGC TTTTCTTTAAAT GTGCT CAAATC TTTAAA AAAGAAA TCC GGA  
CCTCATTACGT ACCC ATCCAATCT ATCCAGCCTCTTCCAGAGACATTACAATTACAATAGATAGAGATC  
TTCCAGCAGATCTCGTACGCAGAGA ACT TTTAAG TTTT GAATC TAAA TGGCTT GAAA GTGTTTCAATTTGT  
CAGTGTATATCAAGGGAGAGACTC TGCATCTCAAAG TAAAAACG TTTT CTTT C GGAT GGTCTTCCGTGAT  
CACGAACGAACCTT ATCCGGGCAG GAAA TAGAAGAA GAATACGAACG TTTA ACTGCATTACTTGATAAGA  
AA TTAGCCAACATAGGACAAGGCAACTCATGAAGCG TTTA TTT TTTA TCTGCGCCCTCGCCC TTTT CTCT  
CTAGCATATGGAGCTGTTCAAAA GGATCC TATGTTAATGAAGGAGAC TTTT CGTAATAACTACGGGATCA  
TTGTCTCTAAGCAA GAAT GGAACAAACGT GGAT GCGATGGCTCCATCACTAGAGTATTC AAAGATGGAAC  
TACAACCTTAGAAG TTTATGCGCAAGGTGC TTTA CATGGGGAAGTCACACGAACG TTTT CTC ACTTACT  
ACCC TGGCCGTTATA GAAA CTTATGATCAGGGAAGGCTTCT TTTT TAAGAAGACCTTCTTCCCAAATGCC CA  
AACTTGC TAAA GAAGCAG TTTA CCACGAAGAT GGGT CTTT TCCCTAACACGTTGGCCTGACAATAACAA  
CTCTGACACAATCACAGACCCCTGC CAAA TAGAAA AAACCTTATGGGGGAAGAGT ATTGGAAGGTCATTAC  
ACCTCT TTTAATG GAAA ATACTC TTTCAAAAATCC TTAACGGCGAGG GAGTTCGCTCTACTT TTTT TTTT  
ATAGTATCTTGTGACAGAAGAGT CG TTTAATGATGGCGTAATGGTCAAAAAACGACATTTTACTCGAC  
TCGAGAACCC GAAA CCGTC ACTC ATTATGTCAAT GGGTACCC TCACG GAGTTCGG TTTACCTATCTTCT  
GGTGGGATTC CAAATACGATTGAAGAAT GGCATATGGACATCAAGACGGCCTTACAATCTTA TTTAAA  
ATGGTTGTAAGATTGCTGAAGTCCCA CAAA TACGCGGAGCAAAAAATG GAATCGA ACTCCGATACAATGA  
ACAAGA GAATATCGCTGAAGAGA TTTT TTGGCAGCACAACATCTTGCATGGAGT CCGCAAAATCC ATGCG  
GCGG GGGTATGCAAATCCGAAT GGTATTACAAGGCAAACCTGTCTCGCAAATCAAG CAAA AACGACTCA  
GTGCCGAGATA ATTC AACCTTGGGAGCGTCATGGCT GAAA AGTTC CAAA TTGTCTTCCAACGTCCAA  
GAACTG CAAA GCGGAGGCTTGTCTCAAGGCTTCTTA TAAA TAGA ACTCCCCCT ATTC AAATATTGTG  
CA TTTT CCGGGAG ATTC TATT TTTT ACTCAAGGCTCTCTCCCGCTCCGTT TTTA CTTG TTTA TTTT CTTG  
GACCAGGACACATAAGGCTATGGAAGACTTGTCCGCTGGTGTGAAGCCTACGCCAA TAAA ATGCCGCC  
TAAA CTATCT TTTT TTGATCT ATCC TC TTTT AAAGAGAAGCGCTGGCAATCC TACA GAAA TACGCCAA  
ATCC CTTTGGC ACTC GTCATACCTGTGAAGAGATTGCAGAACGCACAAAAACC ATACGGAAGAGGTGC  
TCATCGCTGCCAA GAAA ACCC CTTACCACTACTGATTCCTGCCATC GAGTACT TTTT CATT CATGACTA  
CCC GGGCGGG GAAA AGC TTTA CAAAGCCCTTACC GAA CAAA AAGA ACTCTCTTAATCC TGCATCTTAGGA  
TCTAACGC ATCC GAATCC CATCTCCAATCACAGCAATAGCCATTAACAACAATGTCAACATAATAGCGG  
GAGGCCATAGAAT GCGCTCTCTGATG GAAA TGCTGTG ACTC CTTCTCGCAAAGA TTTT CCAAGATGC  
CGA ACTC TCCTCTCTTA ACCC TAAA AAAGTGAGCCCTGCTTACAGCTAATCATAGCCATCATCGAGAAC  
GGCAA TAAAGAAA TAACCGGAACAATCACGTTAGGAA GGAT CTGATGCACCATAATATGGTAATGGCTGT  
AGCACAAGTTGGTAGCAGCTAGAACAT ACCC TAAA TTC CAAA C TTTAAGG TTTT TATACGCACATAGCG  
ACTAATACTG ACCCATCC AAAGC ATCC CAGCAATACC GAAT CTAATATGAGAGATTTTT CAAA TGTAA  
GCTACCACGAGCATAA GAATAAA CAACATGGGCATGGTCTCCAAA TTTT TGT ACTC GTGATAATAACA  
TGCTACCTTGCCACCAAGTAGCCAGATAACAATCC CACAATGATGCCTA TAAA TAAA GCTATA GAAA  
ACCC AATCCACCAACAACGATCGCAATAC GAATCC CAAAGATCAGAGAAGC GAGTAAA TCC TTTT TATTA  
ATGCGTGTAAAGCTGCCACCAATGCACATACTTGTTCATCTCTCGAGATCC GCGGGCATCATCTTCCAGT  
GAAA GCTGCTTAATAAT GGATTC AAAACCA CAAA TACCTGTT CAG ACTCGG TTTT TATCC AATTACGCTT  
ATCC ATGA TAAA CGTAATCGAAT TA TTTAAA GCTTCACGCTCTTC TAAA AGACTACGTACAAAGGCCAAC

TGCTCTC TAAAAGGAGCCTCTT TTTCCTCAAGAGCCTCAAACGCTGCACGCAACTC TTCTTGG GGATGTT  
GCTCGTATATCGCCAT ATTCAGAGCATGTTCTGAACGTGCTCTAGCCATCAAATAAGGACGGTAATCTTC  
CAGCAAAGTTCCCC ATCCTTCAAACCTTCC GGATAGGAAGCT TTTA ACTTGTGATCTTATT CAAAAA  
AAACGCAGGCTTGCTG TTTCGTTCTTCA TTTC TA GAAAACGCA GAGT CCGCATCGGAGATTGCTTACACA  
ACTC GTATGCCTCCC CAAATT TTTC AAGATGATCGTGCTGCATCTTGCGATA CAAA GCT TTTA CAAGC AT  
TCCCAGCTGCTCATA TTACTCATATAAGCACGCTCAC TTTC CCAAGTGC GTTCT TTTA GCAATTGTT  
GGAA GAAACTCTGTC CAAAGAGT TGT TTTC AATTC CTGTTGCAGATGCTTAGCCCC TTTC TGC TTTA ACA  
GCTC ATCC CGACAA GGAT CTTGAACTC TCCC ACTC AAAGCAAAA GAAT ACCGCAATATGT ATTC CAGT  
CACTACACCTA GAAA CAGCTT TTTC CACACACCCTGAGATAAC GAAA GCC TAAAA TAAAAACGGCAGT  
GTGAGCATTAAGACAT TAAAAA TAAA TCGATAGACTTAGTG TAAA AACCTGG GAAA AGCAAATAACGGA  
ACAAGGGG GAAT ACC ACTC CCCGTGCCAACGAACAA GAATCGG TTTA CTAGAAGC GAA TAAA GGAGCG TA  
AA TACCAATAAGCATAAGTCCAA TAAA GAAC TT TAAA GCTATAGAGGGAAGTGCCCGTCTATTATAAGCA  
CGAAA AAATCGTTGATAAGATG CAAA GGGT TCCTTCATCTCACACCTTCCT TTTC TTCTAGCTGTACACGT  
GGAT CAAGAAGAACGTAACAAAT ATCC CCGATTAAGTAACCGATCAGA GAAA TCACCG ATCC CATAATTA  
CG GAAA ACATCACCACATTGTGATCACGA TTTA GAAT CGCCTGATA GAAAAA TTTC CCGAAA CCATCGAT  
ATCAAATAGTG TTTC CACTAC TAAA GCTCCTCCAAGTAGAGCGCT TAAAGACGAGGC TAAA GAAGTGATT  
AACGTAGCTGCAGAGT TTTC CCCACATGCCGAACCAAATGTCATACTGAGAAA TACCACGAGCTCGAA  
GAGCT GAAA TATGGTCTTCTCCTAAGACTTC TAAA AATACAGCACGACT TAAA CGTGACTGTGCAGCAA  
AGCTCCGTAAC TGACAGCACAAAAAGGCAAGAAA CTGTGTAACACAAT ATCCGTCAGCT TTTC AAAAGAA  
GTCA TTTC CAAA AAT TTTC TGGAGATGAACACAGTCCACTGTAAGGCATAGAAA TGGACGTAAA TGAA  
CTGT TTTATTTA GAAC GAAAT TATCAATA ATCC AAGGACAGCAACAAAGACAG GAAT AGAAA TAAA AT  
CAAAAATAGAAA ATGAGAAGATGATCT ATCCAATGTT TTTAT TTC ACAGCCATGATCATACCGAACCT  
TGGCATAATATAAAA ACCACAATCATAGGAAGCAG GGATAGAAT AAGTGACGAACC TAAACG CAAA ATCA  
CTTCA GAAA CGACCGTCTTATGACAGTCGTTGCGTAACGTTCCAAA ATCCAATCTAACGATACGA GAAA G  
GTACTTAGCAAACCGCGTCTCTAA GAAA AAGATCC TCCAGAGATCTCTTCGCATTAATTGCCCTCTTCCG  
CCCTCTTGCTCA ACCCATTCTTGTAAACGCGGCAAC TTTA ACTTCGATATTATCTTC ATTC AATAAA CGCA  
CGAGTCTGCATTGCT TTTA GACACTT CAAA ATTAT ATTC CGCGTGTTCCTCCAGCAAACGTGCTCCAAC  
AATCCCTGAC GAAT ACCTCCTC GAATGAATAAA TCTGCTGCAACATGTCGATAAAA TATCC TC TTTC GAA  
GAAT CTTCAGCCTCTGCAAGCAGCGCCGGCATAATGAAC TTGGCACAATCTCCCAATACACCTTAATAT  
TGGTTATGCTTCTGTCTT ACTC TTCTTGTGAAT CGTCCCATCAATAATCTCTT GAATCC CAGCAGGAG  
TTCCGATCGA GAAA TCTGTGGTC GAGTAT TAAA AAAAATAGGGAGAGT TAATCC GTAATGCTCTC TAAAT  
TG TAAA TAACGGTCCGCCCC TTTA TACGTAC GAAT CTT ATCC GATCTCCAGCCTCACCTGGGC ATCCA  
CACTATGTTCTCAAGCAGGTCTCCTGGAGCAGCATTGAGAAT CACAAA ATTC ACAGAGATGATAGCAA  
GAGCGTTAAGG GAAT CAAAAGCAGACGT TTTA AGATATAGCGGAGCATCGACCC TCCTC TTTA TCT ACCC  
ACAACAT GGATAAA TTC ACTGTCTCATCTTGAGCTCCAG GAAT CAA ATCC TGATGTTCTGTTGGCACAAA  
AATATTT TTTA CAAACTC CTATAGACAAGG GAGT ACTGTCTT GAAT AGA GAAA CGCGTAAGGAG ATTC  
TCAT GAAT CACCTCGT GAAAACGGTGATACAAGGCTTGGCGCTTATTAGAAT CATACTC GTAAC TGAGCT  
GTTGATGATACGGTCTGCTTCCTCATTACAAA ATCC AACAGCATTGGCAGATCC TTTC TCCAAAGCTCC  
TTCC GAAT GCCATAGAGCACGA GGAT CTTCTGGAGGGGTTC TAAA CACCATCC GAAA GAATAGCATCG  
AAA TT TTTC TCCTCGAGGGCTTGT GAAT AATCC GCCATATCTAACCCGAGTAAGCAAC ACTC GAT ACCCA  
CCTC TTTA CATAACCGTAGCTACATA TTC GGCAATCGTTCGTGCTGTTACACT TTTC ACATAGTAGCATAA  
CCG GAAA CG GAAA GGC ACTACA ACTC CATCGATTAC TTTC TCAC GAAT ACCATCTCCATCAGCATCG ATC  
CAGCCCTCTTCTCTAA TTTA CGTGGCCCTCTTCCGGAGAGT ATTGCC ATCC CTCTACATCTCTGTTGT  
ATGATGGAGAGCAGAGA GAAA AAGGCC ACTC ACAGAG ACTC CACGACC ATCC AAGCACTGCTCAATAAT  
GCG ATCC CGATCGATCAACAT ATTC ATGGCTTGTGCTACCGAACGATTGT TAAAGAAA AGA GAAA GACAA  
TTCC ATCC GATGTAA GAATAGGACCGGTCTGAT GAAT TTT TTTC TAAA ATTGCCCTCTCCTCTAGCAGCTT  
GTTCTTATAAGCAGAGG CAAA CATGAAGCTCGCTAGATTATCGACATGGTTAGGAGG GAAA TACGCAAT  
ATCC ACCTTCCCAGC CAAAAA TCTTGGAAAGAGA GAAT CTGTACTATC TTTC ATATAGATATAGCGCTTC  
TCCACAAGAGCCGCAAAC GGAT TATGATAATTAGGAT TACGAAC TAAA GTAAT TTTC TCATC ATCC ATCC  
CTGCAAATCGGAAT GCTCCACAGCTCACTATGTAATTATACGCCAATGTGAAGAAA AGT CAAA CGCCCA  
TACC GAAT CAAA CGATACGTATCG GGAT CAGAAT CTTCTGGAACGATCTTCTCTCCA CAAA CGAAA TAC  
TGATACAC GAAA CAAGGTAACGGTTG GAGTGCCAATGT ATTC GC GAAA GCAGAA TAAA GCACTTT TTTC T  
CTTCTCTCCCTGTTTACGTACAGTATGAGCTCTCCAACGAACGATTAAT TTTC AAATCGT TTTC TAC

CCGAACC GAAA CCAT ATCC TCAAAATAAGATCTCATAGCCACTGCACGCAT TTC TGCAACATAG GGATTC  
ATGACTACATCGTAATAGAACTTCACATCATGAGCGGTGACAGGATGTGGTCTTAAGAAGGTGTCTGCTA  
AAGTTATATTTTA GGAACAGCGTAGGATCTATCGGCTCCCAAAACATATTAGGACGCAA TAAA TATG  
AAA TTC TTTATCC CCAG ACCCATCC TCTACATAATGCTCTTCTATC TTTAAGGC TAAA CTAGGCGCAAAC  
TCCTCGTATTTA CCAACATGCTCAACAGCCAAATTAGGAACGCACAATTCATAAA ATCGAACGATATTA  
CAAAGCCAT TAAA CGGACTTAGGTATCAGGCCTTCTACTTGAGCTGTACGCAAATACC TTC GGAAC  
AAAACCTTCC TTTA ACAACGAAGGGACCACTT TTC AACATAA GGGT CTTCGCATAA TAAA TTAGGGAAC  
GCAGGATCTCCGCAATCC TTCAATACACTGATCTCTGGA GAAA CAGAAA AATCTATAGACTGG ACCAAT  
TTTCAA CTGATGCGAGATCCGGACTA ACTCAAGAACATCTTCATG TAAAGCCTT GAGT TCTCT CAAA AT  
CGAT TTC ACATCTT TTC AAGTAGATCTGAAGACCAATACAACAG GAAT AAGGACAGAACCAGTACTGTT  
CGTATAAT TTTA TCTATCATGCGTTGTCTCCTCTATTC GTT GAAA ACGCACC AAAAAGTCTCAAGACAGG  
TCTA GAATACTC TTATCAATCT GGGT CAAAAATTC TAGTAACTAGC GAAT TATAGCAAAGAAA AGCTTT  
TTC CTCTTACAAA CAAGATGATCGACTTACT GAAAGAAA TAT TTC AAAAAATATTTA GGAAGGAGCTGGT  
ATAGAG AATCT TTTA GAAAAAAAAGAGAGT T GAAA ATTC AACTC TCT TTTAGAAA AAATATC GAATA  
GGAT CTCTAG TTC TTCTCCACCTTCTTCCCCTTCGCAAGCTAGG GAAA CAAC TAAA GAAGAAA CTCTT  
TTTC TTCTTCAGTCTCATCAGCG TAAA CGGAACCAGCAGCGGCAGCAGAAGTTAACATTGC GAG TAAA AG  
TAATTT TTC ATTGGCGTCTCCT TTTA ATAGGTAGA TTC AC GAAT AATCC GAAC TTCTTACT TTC TCTC  
CTC GAAA AAAATGCTATAGAAA GAAT AGAAGC GGAT CTAAGCTGTGTAAGCTCGGCCAAAC TTTA GAA  
AATCAGAAA ATATAGGCAAGGAAA GGATCG TTC TGGATAGTTGTGATCA GAAT AGATCC TTGCTAGC  
GCAAAAC TAAA AACTG TTC AAGTGGCGATAAGAAA GTTGA TAAA GGAT GGAACCC CAAA ACTATCTAA  
GGCATA TCGATACGCG GAATCC CATGCAATGATTGTGTGGGATAG GAAAAACTAGCCGTATTC CCCAAC  
ACAAA GAAT ACCGATAAGTCTCCTGAACAAAATGCTGACTTACTACATCACT TTC CCCAATG GAAAGA  
AAAAGC TTC TACTGGGC CAAA AATGCG ATTC TCCAA TAAA AT TTTA GATAAT TAAA ATCTCTGTGTCTAG  
ATAAGGAGGAGCATA TTTA AGAT TTC TAATCGCAA ACCCTGAAGAAGCAAATCGCAC TAAA GGGCTTGCA  
GCCATATGACACAGCTCTTACTGAACAAAAGGCTGATGATAC GAAA ATAT TTC GTCTCT GAAA AGCTA  
AAA AATCAGAGGGAGCAATTC GCACATCAATGGGAAG ATCC TCTCCTTCAA ATCAGCCACATATCTCCA  
GGCA ACTC CAATAACTGCAGGTATCTGCAAGTCTGAAGAAGAG GAAA GACATGTGTGTAGAAA TCAACA  
GAAGCGTGATC GAAT GTAAGCATAAGGGCCTT TTC TTAGGGAGAG GGGTCTCCAGGCAACAT GAAA GAAT  
AGTGTGCTTAAGAGAGGACAAAAGGCTCACAAACGA CAAA AATAGTGAG GAAA CTTAGAAA AAGAAAC  
CTGTCGATAAGCTAAG ACTC GAAGCAT GGATCAACTGAGGGAAT TGCAAAGGAT CTTCTGGG TAAA TCA  
CTATCTGGCCT GAAA TAATAGTAG GGGTACGCTCTT TTC TTCAAGA ACTC GCTCTGTGT TTC CATAGA  
ACAGA TTC CAGAAA TGGGGGAGGAGCTATGCATAGCAAAAATTC CAAATCAAT TAAA GGGCCCTCAGACTG  
CTGTAACG TTTA GATATAGTCCAA ACCCGCTC TTTATAAAAATTGCTCGTAATCTTCAA ATCC TGGCAAAG  
CCTTCAA ATTC CGTTA ACTC TAAAGAAA AATCC TGATTC AAAGATTC TTTAACCTCAATCATGCGCAATAA  
CGTTA GAAA ACGTAGCATAGG GAAA TCC TTCGAAGAG GAAA TAGAC GAAAGAAGTCTCTAGACTTATCT  
AAA ACCTCTTGATACTGCTTGGTTGCATGCGCATCAGCTAT TTC CTCAATA GAAT ATGTTGAGGAGAAG  
GTAGCTGCAAATGCGTTCATGTTGATAGGCAAGCCCT GAAT AATACGCTCCTCG TAAA GGGT CATTGTG  
TATAT GAAA ACATGAAGC TAAA AATCC AGCGTAC GAAA CAGCCTC TTTACCACCTCTTCGATACGCTGT  
TCAAGCATAGGCATAGCCGTCTCTGGAGG GAAA ATTC CTCGC GAAT AAGCAGCTTCAACTGACCCG GAAA  
GCAACACCAAGCT ATTC TGACGCTCAACACGATAGGT TTC ACATTAACA ACTATCTTCCCT GAAAGAAA  
AATAGA TAAA ACAACAAGGCAAAAAGAGAACAACC GAGTAAGAA GAAA TCTTT TTC GCAAATCTCGAAC  
ATGGTCTTACGC ACCC TA TAAA AGCAAACAGTCC TTC ACCAGTCCAATGCATTAGAAA ACCC TGAGACA  
CCAGTG TAAA ACCGTCTCTATAGGTTGGTTATCTTCTCGA TAAA TATCTTGACTTGGTTCT TTTA CACAA  
GAAGAAC TTTA GATACAGATAGTGTACAATGGTTGTTAT CAAA GAT GTAGGCCTT TTTAAGAAGGATCTT  
CTCTG TTTAAA AAGACGATTC TAAA GCTTGC TTC TCGTTATAAA CAAGAAA CCACCCTAGATCC CAAA  
TACATCGAAC GAAA GAAACTC TATACAACTTT TTTA TTCCCC TTCCTTTATA TTTA AGAGT TTTT TTTA  
CTAAT GAAT AGTCTTCTCCGACTACAGAGA GAAA T GAGTCTCCTATTC CATAAA AAAAAATACCAAGGTA  
AA ATATCTCTTAT TTTA CTCCATCTACAGAGGATCC TTTAT TTC AGGATGGAT TTTATGTCTGTGTGTC  
CCACA GAGT CCTTGTTCATCTCCTACAACTTCTATAGGAGGCTTAGCGTCTCTTGGCGAGCCTCTCTAT  
CCCTCGCGCTCGATACGAAGTAGGGAGCCT TTTA GCTATTGTTGG ACTCATTC TGACCTTAATAGGGGC  
TGCGAGC ATTC ACGCAGTGT TTTA CAATCTGTGGCT ACCC CCGCTATAC TTC CC CAAATTCAGC TTC  
TCT ATTC GCCC CAAA GCGACAGCTATTT TTC TGTGATTGTGGG ACTCGCTCTCCTCATAGGAG GGATCT  
TTC TTCTCCCTGTACAGCAAGAAA CGCCGCACTC TTCTCTTCGCTA TTTAGCTACT ACCC CGTAGA ACTT

AATGAGTTT TTTA GA TTTCTTCAGGTCTACC TTTCTTAACTGTTTCG TAAACCTGTAATCCCTTAGCATTC  
ATTCCTTGCTGAAAATAGAGAATCCCCAGCTTATTATTGTATTCCGCGTCATGGGGTTTCAAATTTCAAGA  
CAATCTCGTATTCACGAATTTCTTTCTTGGGCA CAAA TAGATCATGATAGCTATAGGCCAACTGTGTATG  
CACC AACATTCCTGGAGCGTATTCGTTAAGAATCTTGAATTC TTCTGTAGCCCTATGCGCTGTTGCA  
AAAACTTTTCTCTGAATATCCCTCCATAACGTCTGGAGGAACCAATAATTTCTGTATCAAATTC CGTGT  
A TTTCTG GGGTCTGCA TAAAGCCCCGATAGTGATACGTAGGCATCTGCTAAGGAAA CGTGTGCACCCAA  
GTCTGTAGGAAT TGCTTGACAAC TAG TAAATACAAATCAATTGC TTTCTGCAAAGCATCTCTCGGAAA  
GAAA AATAATCC TTCCAAAAACAAAACAGCTGAATTT CAAAATAGAGTCGTAGGGAGGCACTAT TTTCA  
A TAAATACAAAAACAAAAT ACTCTTGAT CAAA CATTACCAGAGATAGCTGTGTAAGTGTGCTGCAGCGAT  
CTCTGGGTGTTCTCCATCATGTT TTTCTTTTAA AATTACCTGAGCTTGATGAACAAAGTCCGCAAGG  
AGTTTATCAAAGAATTC CGT TTTCTTAGATAGAATGTAGAGCC GAATGAC TAAA CATA TAAATATTGTAA  
GAACAAAACAGGCCAGGCAGAAGGCTGGTAGAAGAGT TTTCCAGAGAAA GAAA AAAG TAAAGAAA GAT  
TCCAGCTCTGCGACCAT TAAAGTCA TCC TAAAGCAACCAA TAAAGTCTGCTTGAGCAGATAGCGCAAT  
AAGAGTCGATGCGT TTTCTTACA TAAAGACTCTAATATGGACTGAGCG TTTCTGTGA TTTCTATA GAAATCC  
CGCACTCCTAACAAA CCAGGCGTCCCAGAACTAGC TTTCCATCTCTTT TTTCCGGAGAGACTATTAAG  
GAATA TTTCTTTAAGACTATATTC TTAGAGACAATACTGAACAGGCAT TTTCTTGAGAAGTTCAAAGCG  
TATCCCGTCTAAGGCATTAGAAGCGGCTC TAAAGAA G TTTCTGTGGGAACTTCTGACTATTGCTGCTA  
GAGAGGATACCCATCTAGAAGAAGCATTGATAGCTGGATACGAACCACACGAT ACTCCT CAAA CAGCAA  
TATAGGCACATACAGATGATCTA TTTCTATATA GAGTCTCAATATGATCCGAAA CAAATCCAAAAGGGACA  
ATCACAATGTAGCG TTTCTTGGTACGCAAAGACTGACAGACCTCTT GAGTAGAGGGATCTAGCCAT TTTCT  
CAATCCCAAACCTTAGATT GAAAAGCAA TTTCTCCCTCTAATTC ACCTCGTAATGCTTC GAAA GAAGCCTG  
ACATTGCTGAGCATAA GGATCTCC TAAAGCAATATGCC CAAAAGGTAATCCGTGTACAGAAAAA GAAAA  
TAACAATCC TCCACAGCGATCTGCTGAGCGGCT TAAAGAGTCTCGAATATGCTGTTGCATACACGAGACAA  
ACTGAGGATGC ACTC CAAACTGCGTAATCCAAAGAA TGGGT TTTCTGGAAGATGTTGTAA GAAA AATCG  
AAT TATACTCCTGTTACTGCGAAGGTGTAATGTGG GAATAATGGAATCCCAACTATGCTTCCCTGGCTT  
TC TTGTAATGCCTGTAAGG TTTCTCCGGT GAGTCTCTGG TAAATATCTAT GAAAAG GAATAACTGAAGCTT  
GCAATTC TTGAGAGAGGT CAAAAGCTAGTCTCTCTGTATCTT GAAA AATAGGAGATCCCTCC TAAATA  
AGCGTATTGTGCGCTACATGAGGAGCTCGACGCTTAGCAATATAA GAAAACAATGGCCTATGCAACACG  
GAAGGAATC ATTCCTCCTGTAACATCTCGATCTGTCAATAGAGCTTGTAGAAA GCTGACAATCTCCTGAG  
AAGTCTTTGGACCTCCAAAATTGGCTAG TAAATATGTTACCACAGTCTCTTTTAAATTCCTTGTCTAAGG  
AAGCCGGGATGTCAT TTTAATGGC CAAATATCTTCTGATCGACGAAT CAAA CCAATCCTGCAT TAAAT  
CC TTCCAATAGGGAATCCGATCC TCTCCTCGTAACACAAC TAAACGCAAACCTTCTCATTAAAGAGGT  
CTGAAGCATTCCGCAAACGTCC TTTA TAAGCCG TTTCTACT TAAAGCAGTTGCCTCTATTACAGGCACCAA  
TAACGCATCATAACGCT GAGTAGACAAAGCTTCTAAGGCTACAGGAATATGCTGATAGGAATCGATCACA  
GCATGGGAACATTCGTGCAATAAGAACGGATGAATCGAATTTA TATACTCCGATCAACTTTCTTCTA  
AATCC TGGAGAGAATGATACGGA GAAT TTTCTAAA ACAACAAGCACAGGCCCGGTTAA TAAACGGGATC  
TGAAA ACTGGTACCGAGCTAACA TTTCTATTGAAGGAGAGGCTGAAG TAAAGGCTCCGCTAGTCTTCTTA  
TCATCTAAATTC TCAAAAAGATGAACCAATCTTGGTTCACTATAGAGATATTC AACCTTCTTGTAAAT  
TAATCTCAGAACTAAA TCAATTCACAAAGGCGTTAATTCCTGATGTA TAAATACCAAATGTTGAGGGAA  
CCAAGTAGCATCCCTCCGACGAGAACCCTTGT TTTCTCTCTGGAAC ATCCGTAGCAAACGCTACAATA  
ACCAAGAC TAAA AAGCTTAATGGACGCAATACT TAAATTTCACTCTAACCTCAGAGATCAGACTAGATC  
CCC GAATCATATTC AAGA GAAA AATTTTATCCACCCACTATGATTACGC CAAA CTTATGTAGAATGAGC  
CGAGTCTCTTGCT GAATGTATTC TGAAGAAA AGTCCCCCAGAT TTTCTACG TTTCCGAAGCTCTAAT  
CCCTGTACTAGAAT CTCTGCGGAGATGCGTTCTC TAAA AAGAGAATCCATCCGGTCTAATAGGC CAA  
ATTGTACAACGTACGA TAAAACCTCTTGAAGAAA CGCGTCTCCAAAGCATAAGGAGGATCTATA TAAAC  
GATATCAAAGAACGATTCGT TTTA CCTAAGCGTAGCAACGCTGAACGAACGTCTTGCTTCAGGATATGA  
ACAGGCAAATTGCTATCTAACAAAGCAAGATTAGCTC GAAT TAAA CGCACGGCTTCAACAGAG GAATCTA  
CAAATGTAGCAGATTC TGCGCCCTACTAATAGCTTCAAATCCCATAGATCCGATCC TGCAAACAAATC  
CAAAAACCGTGCGCCAACTATATGATTGGCACAAAAT TAAA AACAGCCTCCTTACCACACCACAAGTA  
GGACGAACAGAGGGATTA GAAA AAGTCTTTTAAA GACTTCCC CAAA AATTTTACCAGAAA GAATTTTCAACT  
GACAACCTGAGGAA TAAA ATCAACGTAATCGGCAGCCACGAGAGTGTACTCAATTCCTCGGATATTC CCA  
AATCCAGG GAAA GGTGCGGGCACCTTATG TAAA TGCCCAAACAAAACACGAGAGACGCGGCC ATCCATCT  
CTAACAAATTA GAAA CTCGCCAGGCGTCCGCTCATTACTAACCGGAGGATAGTGCGTCATAACCAAAC

ATCTTCTACAGAAGCGGGCAACTCFTTCAGAGCTCGCTCTAAAACGACCATATTCATCGAAGGAAAATTTTATCATCTTGCTCAGTTAAAACCTCTCTGAGGACCATCATGTTGCGFTTCCCAATGGAGGCAAATGTCAGAAGAATCCCAAAAACGAAACCCCAACAATTGCCTGATGAGCATTAAAGCAACACGATATCCCAAAAAAGATAATGAAGAGFTTCTGGCAAAACGTTTCGCAAGFTTTCGCAGAAGAAGCTGAACTCCAATAATCATGATTCACACGGATCATGTACAAAATCCCGGGGAGAGCTCTAAAAAACGAAAATCAACCTGAGCTTCTTCTAAAACGCATTGCCAGGAAATATCTCCGGGCAGACAAACAATATCATCCGATGAGACGATATCTCTCCAGTGCTFTTCAATTTCAAAGTGATACCCACCCAAAGGCTCACAAAAACCTCCATAGTFTTCTCGGGGACTCCTAAGGATAGATGTAGATCTGCAAGGGCAAATAACGCATGAAACCTCTTGCTTGATAGAAAGAAATCAGCTCTTTATCAAACCAACCACTTTTACCCAAATCAACAGCTCGAAAAGAAAATCCACTCTAAAATACGTAATTATCTGGGACAAAAGTTCTCTAGGAACGATGATAATACCATCTCGAACAATAAFTTCCCATCTGGAGAATCATAATCCTTATGCCCTGCAGATTCCTGTAACGCACACCGFTTCTATAACAGCAGTFTTCAATCAATAATGGTFTTATGAAFTTTCACAGTFTTCCCAATCCCAAAGGGAAAAGACTCAGAACCATACGAATCGTTCCCATCATGATAGAACGGTCAAACACAGATCCCTGGCCTATTACCCCTCGAACTCAACGACACTATTCGAGACCTGGCCAGACTCAATCATAGCTCCTTACACAGTAAAGAACTCGAAATTCGAATCTGAAATAATTGCTCCAGGAAGATGATTATTFTTACTATAGATTATCCCCCCGTCATCATAACAATTAAGCCACGAATATTGTGCGAAGGCCGTTGAGTCAAAGCCATATTAGCTTCGTAATAAGATTTATATAGTCCCGATATCTGTCCAATAACCGTGTACAGATATGCAACAGTFTTCCCGCGATGCACAAATCTATGAATCAGCTCTTCCAAAATCATCTCCAGTTTCTTCTAGAAGCAATTGGAAGAGACAATCTTACGAAAAGATAAATCCCATAGATCCTAGAAAATCCCGTGCTGAGGATCGAGACCAAATTTTTCATCGCCGTGTACTTAGACGAAAATGTTTCAAATCTCTTACCAAAGGFTTCTCATAGAAAATCAATCAGTTCGACTCATCGTCTACTTCAACACTCCGAATCGTGAACATCTTTATCTGATACAGGCTGAGAAGCGATCACCATATCCGCCTGTGCATCGATAGCATAATCTACTATCGAGCGAAAATCCATATTGTATAGTTGGTCACCTGACAAGATTAAAAAATACTCCACACGAGAATCTTGTAGATAAAGAAGATCAAAGCGAATGTCATCAGCTGTTCCCTGATACCAAACCTGACTTCCATCTCGTCTTTCAGGGACCAAGAGATGAATCTGATCCTGCATGACTCATGGTAAAAATACGTCTTAATAAGTGTTGCTGTAAAAGTATAGTAAGGTATTGCCGATAACAAAATCTTGAAAATTCGAGGCAAAGGCATGAGATATAGGCACATCAATAAGCTTGTATCTTCCCCAAAAGATACTGTTGGCTTACAACGCCAACAAGTTAACGGAGATAATCGFTTCCCTCTCCTCCGCATAAGACAATAACTCTACGTTATCTCGATAGAAATGCGATCGTFTTTCGATTGATCTGCTCTTCTTTCGTCCGTCTACCAGCCATCTGTCCCGCCACCAAAAAATAATTTTAAAAATAAATTTATAAAAAGCCGACAAACAAAACCTGTAATTATTGCATGAATAATAAATCGATTTATTFTTAGATGCAAAAAATAAATAAATTATCTAATCAAAACAAAAACGGACCCATACCCTTTATAGAGATAAGAACTCTTTTCGACTCGCCTATGCTATTCACATCCAAATGGCATACCTATCCAAGAGCAGATTCATCACCTTGAACCTCCTCTGCGGATCAFTTCTTTTATGGGAAAAGATTCCTTAGGAATTTACAGTGAACATAAGAAAGCTTTTACTCAGATGAAGTAGCGGAACTCAAAAAGACAGCTCTACTACAATTAAGGGGTGGCCFTTTCGGAATATTCAAACCTATCAAGCCACCCGATCATCATACCTGAAATTCATGATCGGATAAAGACGATCTTAATCCTTCAAGGATAACAGGAATTCGTATTGCTACAAATCTTTTCAAACGGCCTAGCAGTAATGCATAGCATCTATTGCTGTAAAACAGCTATAGCTTGTGCGGAACAACCGAACFTTCTCAAGCTCTCCAGGGTGGTACAACAATTCCTTCTTTCGTGTTCCACTCTAATCAAATCGATAGCCGGATAGATTCATGCGATCAGAAAATGATGGCGGTCAAGAACCACTCCATATCCAGTTCCCAAAATTCCTCAAAGATCACTTCGTCCATTCATTCATCCGTGATCAATCAACGCTGTGGCCAAGATAGTTAACGATCCCTCCGCCTCAATAFTTCTAGCTGCACCGAAAGAAACGCTTAGGFTTATGTAACGCGCTAGCGTCTACTCCCCAGTGAGGATCTTCCCTGAATGCGGCTGCACAGTATTGTATGCACGAGCTAGACGCGTAATCGAATCTAATAGAATCACAAATCCTTACCGTGTTCGACCAACGCTCTTGCCFTTTCGATCACCATTCAGTAACCTGAATGTGTGCATCCGGTTGTTCATCAAATGTGCGAGGCGACGACCTCCCCTCGAACCTGACGAATCATATCCGTCACCTCTTCAGGACGCTCATCAATTAGCAAAAACATCAGCTCTGCGTCAAGGATATTCACAGCAATAGCATGTGCAATGCAAAACAAGATTACCGTCTTACCTGAGCGAGGAGGCGCAACGATCAATCCCTCGTTGTCCCTTACCGATTGGAGCTGTAAAATCTAATACTCGCTCTGCTAAAATTCCTTTCCTTATCTCCATGATCAATCGTTCATTAGGATGAAGAGGGTGTAGGTTCTCGAATAAACACGCTCTCAAACTTATCAGGCGTTGAGCCATTAATCTTATCCACTTCAACAGCGCAAAATAFTTCTCTTFTTCCTTAGGAGAAGGATCGTCCCAACGATGGTATCTCCTTTTCAAATCGAAAACGACGGATCTGCGCAGGAGAAAATAGATATCTTCTGCGGAAGGAAGATAGTTGTAAGTGGAGACCTAAGAAATCCAAAACCATCCGGGAGAACCCTCCAGGACACCTTCTCCAATCAAAGAAATTCATCAGGACGTTCAGATTTAGCCTTAACGATTCGAACACTACCTGCGAFTTCGTGAGAGAACCATTCATAACATCCATATTGCCGAGCTAAAACATTCAGCTCATTAATGCCATGCGTGTAGTTTAGCAATCTTCGTAAGTCTACTGGTTGCGAGGFTTCTTTCCTTCTGTAGCAACAGCACTGTCTTCACTAACTTCTTTCACAG

ATAAA GGGCCCTCGGCCTCTTGTGCTCC TTTA CCT CAAATAAGACCTCGGCTGGACTCTCTTC TTTCAT  
ATTGTTCCC TTTAAA GCCT TAAA ACATTGT TTTA CCAAACGAC GAAATTC TTC TTTC GTTCCATTATTC  
CTATGACCACATCC GCTCGCAGGAT TTTTTC TTC TAAA GAAAGAAA AGCGTGCACACCCGAAGATC GAAACT  
GGTGTCCGAACCTCCAGTTTT TTTAAGAAAACGCTC CAAACGTAT ACCCGTATCTGCA GAAAT TAAA ATA  
ACCTGATCAAACCAATCC GCATACT GAATCTCATAACAACAGAG GAAATTC CACAA TAAA CAGAGGAT ACT  
CAAA TTCCTGAACCACGTGCGCATATT TTTC CTCAACAAAACGACACACTTCC GGAT GCAAAATCTCTTC  
TAAA GACAGCAA TAAA TCC CGGTTACCAAAAACCT TTTCAGCAATGGCC TTTC TACTAA GAGTATTC TCT  
ATGATTATCTCTGG ACCCAAAGATCAATTATACGTTG ACCCACTGAGGTATAAGGAACAAG GAAA CTAT  
GAGAAA TTTA TCAGCACTAATTACATAAGCTCCCAAATCTTCAAAAACCTGACACGCCTCAGT TTTC CC  
TGAAGAG GGATCTCTGTAAACA GAAA TCTTCAA TAAA TCTAGC ATTC CGCCCAATTT TTTC CAATTAAGA  
CATTC ACAAC TAAA GGAACAGACAGCTCCATTGCAG ACTCCAT TTTC TCTTGAAC TAGACTTCTCATCTC  
TTCCA ATTC TTCTGCAGGGACTTCAAATAATA ATTC GTCAT GAA CAAA CAATAA TAAA CGACTT TTTAAT  
CCCTCGACCTCA TTTC GTCTGAGAT ATTC AACATAGCCAAC TTAATTA ACTC TGCAGC ACTC CCTTGTA  
TACGCGTA TTTA CAGCAAGTCTCCAGAAGCAGCAGAGCTCCAGGAGAGCTCTCCAATCGCTCA GAAT  
ACGCTCTCTCCCAGCATTGTGGTTAC TTTC TGATTC TTA TAGCTTGCTCTATCGTCTGTGTAA TAAAT  
TCTGCTGCTAGAGGATAACGCGCAAAATAGGC ATCC ATTAATCC CTGAGCCTCACTTACGCTAATC TTTA  
AAATT CAAA ATAATCC ATACGCCTGCTGTCCATACACTAAGCCAAA ATTC ACTGC TTTAGCCTGATAACG  
CTCTGCTTCGTAACCTGCTCCAAAGGAACATTGAACACTTGCGAAGCGGT GAAT GCAT GAATATCC TCG  
CC GAAT TAAA AGCTCTCTTCAACGTCTC ATCC TGACTAAGGTGGGCAA GAAA CCGTA ACTC AATCTGAG  
AAT AATCAGCAGC TAAA AAATAATCATTGTCTTT TTTA ACTC GAAA AGCCTCTCGCAAAGATCTCCCTCT  
TTC AGAACGCACAG GAATAT CAAA AAGATTAGGATCC TGACAGGAT AATCTGCCTGTTACCGTTCCTACT  
TGGT TAAA AGTT GGATGAATTC GTTGCCTCCCGCATTGATCTGCTTAGGCAAAGCTCGAACATATGTAG  
ACAACAT TTTC TCTGTAGCACGGAACATCAAATCTTGG GAAT AATCTCGTGACGGTCTTCTAGAGCTTC  
CAGAACCTCTGCC CAAA TAGA CAAA GC TTTATCC ACAGGCTCTATTC CCAAACGCTGATACAAAATATCT  
GATAACTGCTTAGGAGA TTTA ATAT TAAATTC ACAGCCAGT TAAA TCG TAAATTC CTGAGAAC ATTC TT  
CGAGCTC CAAA GTTAGATCTCT ATCC AAAACAGCTA ATCC TTGACT ATCCAAGGGC ATTC CACGCATTC  
CATGGC GAATAACACGGCTTCCAAGGGT TGCTCAACCGTCTCAAAAATATCT TTTA GCCCCT TTTC TTCT  
AACTTCACAAA TAAA TAATT CAAA ATCGCTAGTAAT CAAAAGCAAAC ATTC C GAAA TATTGCGCGGGAT  
CACGCGGTAGGCTCTGTACAGGAAGCGAGCCGGCCCCC ATTC CTTA GAAAAAAACACTGCTTCTT GAAT  
ATGTCC GGATTC CATTAAACAAAGTCTG GAAAGAAA TT CAAACTCCGCC ACTC ACTAAA TGCTCTGCTAGA  
ACCAAATCTGCTGTTACATGAACATCG ATCC CAGAA TTTCT TAAA GCGTGATTATCGCG TTTA GAGCGGT  
ATCC AAAAAATT GAGTCG TTTA TCTGCAAAAAGTC TTTA AGCAAAGCAATCTTTGTACACCAGATAC  
CTCTATA TAAA ATACCTGGTTGGCCCCAGCTAAGGCTACGCCGTGTAGCTGCAAAGAAGGGAGATGCTCC  
CCAGTATAAGCCGCACAAT ACCCAACTTCTCCCCCTCAACTGTTT TAAA ACAGTCTTCAAAGTTACCG  
GAT CTGTCACAGTCTGTACC GCAATGGA ACTC GTAGCAG TTTC C GAATGCTTTA CCAGAGCCT TAAA TCC  
ATGCTGCAAA TAAA AGGT ATTC AACTGCGCT GAAT CTATAGCTTGCGGAGAAA ACGCAA ACTC CTCAGTC  
GTCAACGGGAACGCGAG ATCC ATGTGTAACGTGGCAAGACG TTTA CTC AAAAGCAACGTCTC TTTC TGAT  
CTTCTATCA CAAATTTA GT CAAA CCAGA TAAA CGTTCGGTATTAGCAACTA ACTC CTCTACTGATT GAAA  
CTC CTTCAATAGAGCTTGAGCCTT CAAA GGACCACAACCA GAAA CGCCAGGAAT ATTATCGGAA GAAT CT  
CCC ACTAACGCCAAGTAATCTGCAATCTGCTCCGGAGGC ACTC CGAACTGCAATAGTACTTTCGTTATATT  
GGAT TTTC CTGTTT TTTC CAAGGAT TAAA TACGGAGACACGGCTGCTCACCAGTTGCAATAAGTCC TTATC  
GGCAGTGCAAATACACTTCAAACCATCTGCAACCGCTTT TTTA GTGATACTAGCAATCACATCATCA  
GCCTCTAC ACCCT TTTC TTCCAGGCACGAGATACCAAGTAATTC ACAATATTGCTTCAC TAAA C GAACAA  
ACTCTGGAAGATCC TCTAACTGACGATCACGGTTACT TTTA TAGTCGGCA TAAA GCTCTTGACGGCTCTG  
CTTATTATTGGGACCATCAAATACAGCAACCAGT ATTC CGGGAGAGAGGTC CAAA ATCAACTTATC TAAA  
GAGC GAAT GAAA CC GAAT ACCGCTTGCGTACT TTTC TCCA CAAA GACCTCGCATCTCAGGAAGAGCAAAT  
ATGCC C GAAAAACAAATCC T GAAA CATC TAAA ACAAAGT TTTT TTTC ATATGCACCG ATCC AGCCTCAC  
CCATGTACCACAAAGATT CAAA TTGCTGATCAGG TAAA GCCGTCACTTG GAG TTTC CCTGTTACAAGCGG  
GCTATTACTTAGATAGCTAGAAA AACGT TTTAAA AAATGGCCAGA ACCCAACCC AATG ACTC GATAATTG  
TC CAAA ATACCACAGGCTTACGCCAGTTCTTC TAAA GCTTGTTCTT GAG CAAA ATTGATCGCATCC ACCA  
ACCC TTCTTCCAGAGCTTGCTTCGCAA TAAA ATACAGGGCTCCCAAACCTTTCGTTAGTT TTTC CTTAGA  
CAGCTTCGAACGATA TTTA ACAACATG ATCC ACAAACTGTTTATA GAAAGC ATCC ACT ATCCCTGGCGC  
TCGGCGT ACTC TTCTCTGTCCATGAA GAAAAA GGATTTAACGGCGC CAAA TCATCTCCCGCTGTAA GAA



TAGCAGTTTCACGCCATGTCGTTGTAAGCCTTC TTTAACAT TAAA ATATGGGCCCGAACGTACTCCTAT  
TGAACCAATCAGAGA ACTCGAAGTGGTTCCAAT TTTATCGGCAATACAAGCAACATAAT ATCC TCCGGAA  
GCACAGAGTCCAGATACAAAGACGTGGACAGGGATTC CCCACTGTTTC TTCCA GAAA GAGAGT GTTGCGC  
ACATCCGATCAA TTTCAAAAACCTCACCACCAGGACAATCTAT CAAA ACTAAG ATCCCT TTTACTC TTCC  
CAAA TAAGGAGCTTCA TTTAAA GGCTG TAAA GC GGAT TG TAAA CGC CAAA CAGCGCCACTGCTAGCGATA  
ATAGCATCGTTAATATCAATCACTGCAATAATGGGAGCAGT TTTCC AAGCTCTTGAACA ACTC CTTGAG  
CGTTGGG GAAA TTGACAAACAAA ACTC CGTCTCCCGCCCCAAGAACAGAGGCCGATAGGACAAAAAT GAA  
TCCGGCAGCTCCTATCACACC TAAA AACAAACCGCAGGC GGAT AAA AACCT TTTA TAAA AATC GAAAA  
AAATTC TTCATGCAA ACCCTAA TAAA TCTATTAATCGCT TTTA GCATTA GAAA CAAAACGGTAC TAAA AC  
AGGG GGAT TA TAAA AAGAATT TTTAAATAAA AAAT TAAA AGACCTG GAAT ACTATA ACTCCAGGTCTT TTT  
CTTCTCAAGACTA TAAA GTTGTGTCAGGTTCTTCTCGAG ACTC AGCATCTAC TAAA GAAGAAGCCTCTCG  
CTCTTCTG TAAA ACATCTTCTT CAGAAGCATTG ACTC TAACAA GAGT CTCGGTCTTGCTGTGT ACTCT  
CTACCTAACCAAGCGATCACAAAG ATCCA ACTCC TAAA GCCAGCAACAACACAATCGTAATCGCA TTTA  
AGCTAGCTGCAACGGACGAGAAGATGATCAGCAGTCTTGG TAAA C TAAA GAGCCCCCTGACTTCCCTAC  
TC TGGAGATC ACCC CATCAATAGCCGCCTTACC GTA ATTCT TCTCATCATCTTCCAAAG GAATAAAA CGCC  
ATCTCCTTGG CAAA ATC GAAA TAGGTGAACTTAATTGCTCTCGAGAAGACGTTCTGAACACCTCCTAACC  
AAGCAGTAAGAAGTAGCGGAGAG ATCC CTAAG ATCC CGCCAAAAATCATAGC ATCC CCT TTTA CAGCATA  
GATAGCGCCAAAGAACAAGGCTCCTGTAATCAATATGGT TAAA GG GGGTACCAAGGCGCCAACAGTCCAT  
CCCCAACGGCGAAT AG CAAA TCCAGCAGC GAAA ATCC CTGCCAAAGCTGAGACG ATTC CTGTGAGCGTGC  
TAATCC TACTC ATATAAGAAT TAAA TTCT ACTC GAGAAGCA TAAA TCC GACAGACTTGGTC TTTCC AAAC  
GACTTCAAAAAGGT GAAT GAC TAAA TTGTAAGAGAGT ACGACGACGGCGATGCCTAATAGATAGCGGGAG  
CGGAGGAGAAGAGCGAAGAGACTT CAAA CT CAAA CCTTCGACCGCTT TTTTC TC TTTCT TTAAGCTGAGCGA  
CCGACA TTTCT TGCTGCCA ACCC CTCTTCTAACATTGACGTCTC ATCC ATCAAGCGATCTAACTTCTGATA  
TAGATAGAGGAT TACTC CGCCGGCCAGCACGATAAGTA GAGT GATATTGAGCAACATCTCATGCCAAGGA  
TCTACGGCCATAGGAAGGCAATTACAGGACTTCTACCGAGCCACAAA GAAA CCTCTCCAGCAAAAACAG  
AAGAGAGG TTTA ATCC AGTATTAATAAGAGCG TAAA ACCGCCCTGCTTCGCGAAC ACTCGTAATATGGTT  
GGCT ACCC CCAAAAACA GAGTAGACAAAACCTACGGA ACTC CATA ACTC AGACATCACATAATACAGGCTA  
TAGCTCCAATATTGAACCATCACTACAAAACCTCTTCCCCTGGAGGTAAGATGGACTGTAGT CAAA CCG  
CCAA TTTATTTA GATGCAGCGCATCTCCTATG GGA TAAA TCACTGTGGCGAACACGCAAAAAAGCC TAA  
AAAACCGCCGAC TAAA GAGATAAAA CACGGTACCTCTT GAATAACGTCG ACTCATCCATCC ATAGATCATG  
GTGACGATAACGGCCCCAGGGACAATCC CCCAGAC TTTCAAGAAA GGTATGACTTCCGCCCTGCTCTAG  
ACCC GAC TAAA ACAAGG GAGTCT TTTCT GTGGTC TTTA TAAA GCGTAGTTAACACCTACAAAAAAGC TAA  
AAAGAATAAGGGTA TAAATTTA GAGAATCTTGACCTGTATATGGG GAAA AAGT ATCC CCTGAACTTC GAA  
AAGGAT TTTA CCTCGGAAGACATACACTCCTTCTAA TTTA TAAA TATTGAAGAC CAAAG GAAA AATTC  
AAA TGATGCGAGGAACCTCGC ACTCT GTT GAAA CAAA GGATAATTACT GGAT GCTTGGCAATGCATAATT  
ACAAGATT TTTAT GAAA TCCAGGGAAC TAGAATACCGCACTTGCTGC TAAA ATTCAAGTTCCTTGATC ACT  
CCGCTCTCT TTTCCAAA GGCACCT ACTC CAAACAGTGCCGCCTATAATCC AAAACTCTCTC TAAA AAG  
TAGAGAGCCCCGA GGAT CACTAAGGGAGCTAACCAAGAAGCTGGTATCTCC ATCC CTATCGTC ACCC CAA  
ATAAA ATAAA GAAT TGAACAAC TGT TAAA AAAC TTTCC AAAAGACAATGCTCTGTAATCAT ATCC CTCCA  
TCC TCGA ACCC AGGAT AGATAGA ACCC GAAGAACAC TAAAAAATATCTCTA GAAA AAATCAGAGCGAGG  
TGCGTAAGCCCTAGAGAGT TTTCC AAAAATAGA ACCC CCACACAGAT TAAAAAATAT TTTA TCTGTGG  
CAGGGT CAAGAAT GGAGCCCAAGCGACTTGTGGCATGTAGCGTCTAGCCAGATAGCCATCTAGAACATC  
GCTAACCATCGCAGCAAAGATAACCAACAACCTTGT TATAATTCTCTCTTGGCA GAAA AGAAGGGCTAAC  
CAC ACCC TGGACAAA GAAA GGAGATTACAGAAT TGTCTCATAACGTTG ATTC GGAAGCTTGTCTT GAAA  
TTC TTAGCCTCCAGCGCAATGACACATATTAT GAAA CATAGAC ACTC CAAAAGCAAGCAGAGAG TTTAGC  
TATGTTCCCGCCA TTTCC CCCAGCTTATCAACAAAAAAC ATTC AAACAAACAAAAA TTTCCAGAAA ACAC  
AATG TAAAGAAA CG GAAA GAGAG GGATTC GA ACCC TCGGT ACCC TTTAAGGGGTACGGTCTTAGCAGG  
GACGTACCTTCGACC ACTCAGTCATC TTTCCAAT GAAA CAACCGGCCAAAAAGCTCCGAAG GGATAAAT  
TTA CACGAGAGT TTTTTT CAAAAA AGCATAAGAGT CAGAATCC TTGCTTCC TAAA AAAGAAGTTGACTG  
TC TAAA AACCCCGTCTCTAACCAA GAAA ACGATATT TTTCTTCCCCTCCCC TTTCC TCTTGAGGAT ATAT  
TCCCCTAT ACCC TAACCTGGCCGAGAGGCTTCC TTTA CCAACCA TAAA AATAATCC TCTAACTATGGCG  
ACCC AGACAAAAA ACCC CAACCCACTCAACTCCTCTCTTCTTAATTC TAAG GAAT CT GAAA TGATTG  
TGCTG GGGTGTATGTTGACCAGTGTCAATCA CAAA AACCTTGCTGCCAACCTTCTT CAGGAAGATGA TTT

CTACTTCTTAGAGCATCGTATTATTFTTTCGTGTGTTGCAGGACGCFTTTC AAGTCTGACCGCCCATGGAT  
CCCATCTTACGGGAGAAGA ACTCAAACGCCGAGATCAACTCAATATCATTGGAGGCCCTCTTATCTAA  
TCACTCTCTCTGAA CAAACAGGGACATCTGCCTATATTGAAGAATACGCA GAAATATCCGCTCCAAATC  
TATTC TAA GAA AATGATTC AAGCGGCCAAAGATATC GAAA GAAAGCCGCTGAAGAGCCACGTGACGTC  
ACTACCGC CAAAGATGATGCTCAAACTTATTGFTTTCGCATAAGCCAAACA ACTA ACTTAGCCCCCTATG  
TCCTTGTGTCAGACAA ACTCAAAGGAGT TGCTTCTTC TAAAGACAAATCC TTTACTCGC TTTA CAAGA  
ACGCCAAGAAGCFTTTC CAAGCAAGTGCTCATGACTC AAGCTCTCTATGCTCTCAGGCTTCCCCACTCAT  
TTCTTAGATCTAGATAGAATGATTAGTGGGTT CAGCCCCTCTAACTTGATCATTC TTGCTGCTCGTCCTG  
CTATGGG GAAACTGC TTTAGCTCTTAACATTGTAGA GAATTC AAT CAAATAGCCGGCTTCTGTAGG  
AATTTFTTCATTAGAGATGACTGTAGACCAGTTAATCCATCGCATCATCTGCTCGGTTCCGAAGTAGAA  
GCTAAA AAAATTAGCGTGGGAGATAFTTTC TGGTAGAGATFTTTC AACCGTGGTCTCTGTGGTAAGAGAGA  
TGGAAGAACATACTCTACTCATAGATGACTACCCGGGTTGAAAATCACAGATCTTCGAGCACGCGCAAG  
AAGAATGAAAGAAA GCTACGATATCCAAFTTTC TAGTTATTGACTACCTACAATTAATCTCTAGCTCTGGG  
AACCTAAGAAATTC TGATTTCG CAAACCAAGAAATFTTC GAAATCTCCA GAATGCT TAAAA CAAAGCTC  
GAGA ACTCAATATTCCTATTCCTGCTCTCTCAATTATCTAGAAA AGTAGAAGACAGAGCTAATCACAG  
ACC CAAATGAGCGA TTTAAGAGAAA GTGGAAGCATTGAACAAGATGCTGACCAAATTATGTT TTTA CTT  
CGCCGC GAATATTATGATCC TAATGATAAA CCTGGAACAGCAGAGT TGATTGTGGC TAAAA ACCGCCACG  
GCTCCATTGGATCTATACAATTAGTT CAAAAA AAGAC CAACTCGATTCC GAAAT TATGCTGGCTGTGA  
GT TCCCTGGATAAA CAAGTTTATTC CAAAAATTGACAGCCATTG TAAACTTCTTCCCATCGCCTGGTGA  
AAGCCGGCGATACAC CAAAGAAA AAAACCTATGAGGATCGGGT GCTTGCTCGATTCTCCTAGGCATTAG  
CTGAGTCT TTTCAAAGACTTACCAATTATTCCTTGGC TAAACCATTAAGAA GAAACCATGTCATCTGT  
TAA GAAA AAACGAAGACTTAAGATCGCCAAGCATAAGCGTAAA AAAAGACGTCGAAGAGATCGGCA TAAA  
AATAGATAGTTAAAT TG CAAAGGT TCTATGTGGACGFTTTC CTGTTGATTACGATGTGATAGTCATTGGCG  
CAGGACATGCTGGTTGTGAAGCTGCGTATTGTGCTGCTAAGATGGGAGCGTCTGTCTTGCTTCTGACCTC  
AAATTTAGATACTATTGCAAA ACTCAGTTGTAATCC TGCTGTAGGAGGTATCGGTAAGGGACACATCGTC  
CGAGAAA TCGATGCTCTCGGTGGAT TATGGCTGAAA T TACTGATCTATCAG GAATTC AATTC GAATCT  
TAAATCAAAC TAAAGTCCC GCAGTACGCGCTCCTCGCGCTCAAGTTGACAAACAGCTGTATCATATTCA  
TATGAAA CGTTGTTAGAACAGGTTCTGGGCTGCATATCATGCAGGGAACAGCTGAGGCACTTTTAGAC  
AATGGC GAAAAAGT TTTAGGAGTCTCTACAAAAGAAGGTTGGCC TATCTAGG GAAACCGTTGT CAAAT  
CTTCTGGA ACTTTATGCGAGGACTTATTCACATTGGA ACCAGA ACTTCTCTGGGGACGATTGGGCGA  
TGCAGCTTC TTTAGGTCFTTTC TGAAGA TTTAAA ACGTTAGGGT TCCATTAGGACG CAAAAA ACAGGA  
ACTCTGCTCGTCTGTTAGCCTCATCTATTGATTFTTTC TGTAAATGGAAGAGCAACCAGGTGATCATAACG  
CAAATTTCTGTTTATC GAAACGAGATG CAAATTCCTACATTGCCACAGT TTTCTTGTACATTACTCATAC  
CACTGATCAAACAAAAGATCTTATAACCAAAAATCTGCATCGTTCCGC CAAATATGGAGGGC GAATCGAA  
GGAGTGGGCCACGATATTGCCCTCTATTGAGGA TAAAATCGT GAAACAAA CAGATAAAGACC GCCACC  
ATATT TTTATTGAGCCTGAAGGACTTAACACACAAGAAGTTTA TGTGAACGGTCTCTCTACATCGATGCC  
TTTC GATGTGCAGTACGATATTATTC GCTCGGFTTTC TGGATTAGAAA ACGCATCATC ACTCGCCCTGCC  
TATGCCATAGAATATGATTATGTT CATGGAAAGCTTATTFTTTC CTTCTTTAGAA TCCAAACTAATCGAAG  
GACTCTTCTTGTGTGGGCAAATCAATGGCACAACA GGATACGAAGAAGCGGCTGCACAAGGCTTGATTGC  
TGGAGT TAATGCCG TAAATAAA GTCTTACGCCGTCTCCA CAAATTCAGCCGTCAAGAGTCTTATATT  
GGGGT CATGTTGGATGATCTCACT ACCCAAGTACTGGACGAGCCTTATCGCATGTT CACCAGTAGGGCAG  
AACATCG TTTATTACTGCGGCAAGATAACGCAGGCATGAGACTCTCTCACTATGGGC ACTCTTAGGACT  
ACTGTCTAGCGAGCGCTATGCTATGTTCCAAGAACA AAAAGCTTGTATAGAACA GAAA AAGAACGGTTA  
TCTAAGAC TTTCC GAAATATGGTGATACGGTAGTCCCATTAACCA GAGT TCTATGTCGTCCCGAAG TTT  
CTTATCAACAGCTTCTTACAGAA FTTCCTGCAGATGTTAGAGATTTA GGTCCATTTGTAGGCGCTTC CAA  
AGAGATGGAGATCAAATATTC CGGCTATATCTCCGACAACAACGTTAATTC GTAGTATGGAGAGATCC  
GAAA ATATTTCAATTC CTGAGGATATTGACTACCACAGCATCTCAGCACTTAGCTTAGAAGCTAGAGAAA  
AGCFTTCTAAATTTACTC CACGCACTATTGGGTCTGCAGCTAGAA TTTCTGGGATTTCTGTGGCAGATAT  
TCAAGTGTCTATGGTCTC CAAAA GAAAGATGCTCATTAATTGCGTT CAAATTCATTGCGAAGGGCTGCC  
TATT TTTAAACAGCTCCA ACTCGAAGAAGCTCTTCTACGAACCTCTTCAAAA FTTC TGTCTGG TAAAT  
ACACATCTTCCGGAAGCTGTGGTATTGGGTA TTTCCGCAAGCCTGAACGAGATCTTACGTTAGAACATT  
TAAA AGAAGACG GAATCCCTATTATCCGTCTATAGCGGCGGAGGACTGTTTT CAAAGATGCAGATAG  
CTTGATGGTCTCTCTGGATTA TAAATTC CCCTACTC CATCTCCATCTTCAAAGATCTCCTGCAATGGACT

CAAGATA TTTA TGCTCCTATCTTCCCTACAGGAT TTTAAA ATTACA GAAA ATGATTACACTTT CAAA GATA  
AAAAAATTGGCGG GAAT GCGCAGTAC ATCCAAAAATATCGAT GGGTTCATCACACAACA TTTCCAAA GAA  
TAT GAATCC TAAA AAGCTTGCTCGCTACCTTCC TACTCCT GAAA TTC AACCTTCTTATCGACAAAATCGT  
TCTCATGAT GAA TTTG TAACCACAATCTATGAACTT CAAAATTC AAGAGAAGA TTTCTT ATCC CAGT TAA  
AGCAATCTGCAGCAAGTAAGATGGTGTGGGAACAAGTTCTATACAAAC ACTCACTC CGATGCTCAGCCT  
TCCTCACC GAAA AGTACACAAATCC TA TAAA AAAAAAC ACCC CCCTCTGCACGGTGCAGAGGGGGGCTT  
GCACAATCTCAAAAACTACGCTACA GAGT TAACTACTTCTGTCTTAGCAAA GAAA TAGCTTACCTCAA  
TAGCGGC ATTTCTCTAGACTATCGG ACCATGAACAGCA TTTACTC CTATCGATTC TCC GAATAAA GCTCG  
AAT CGAACCTTCCGAGCTTC TTTAGGATTC GTTGTCCCATCAACTC TCTGTTACGGGCGACAGCGT TT  
TC CCCTTGCACTACCATTACTACAACAGGACCAGAGATCA TAAA GTCTACCAGTTCTTG GAAA AAAGGTC  
TCTC TTTA TGAACAACA TAAAATCC TTCTGCCTCT TTTACCGAGAGATGAACCAT TTTTCATGGCTGCAAT  
TC TTAGCCAGATT TTTCAAAAATAGCAATAA TTTCCCTATATGAGCCTTGCCCTACA GAAT CAGG CAAA  
ATAATTGATAGAG CAAA TTCCATGT ATTTCTCCTTGTGCTCTC TTTCTCCTGTGCCATAGCACGCACAA  
GC GAGT CATCTCTCCGTA GAAA C GAAA TGAGGCTGAT TTTCAACACAATTGTAA GAAA ACTATAACTTA  
GCTCAGCAT TTTTCAGAAA TACCTGC GAAAGGATCC CTGATTTCT TAGCTT TTTCTTAAATGCTATAGGAAGC  
AGTTCGGCTACTGAAGCTTCTTCAGATAATTTCT TTTA CAGCCTCGGTCATCATAACGATCTGCTGCAAGAC  
GAGAGA ACCCAAGATTC ATTAGAGCTCCGATTC CTTC CAAAAAA GAA GAATTC GCTGTCGAGGAAGGAAC  
TAC GGGT TCCTCTAAG TAAA GGGGCATCAAAGTAGGAAGTTCAAATTTAAGATCC ACCATCAGCT TTTCT  
GCTGTTTT TTTTCCTATCC CAGGAACAGACGCAATAGC TTTACAT TTTCTAAGCGCGCAATAGAACACA  
ACTC TTGCAAAGGGAACATA TTTAAA ATAGATAGTCTGT TTTA GGGCAATACC GAAAAA GAAA TTAA  
TAAAC GAAA AACTC CC TTTTCAGCGGAGAGC TAAA ACCGTATAGAACGTGCTCAG TTTTCAC GAAT GACG  
CTATGAACA TAAA TCAGCACCTCTTGATGCA TAAA TGCGCGCAAATCTAC TAAA AAACGCTCAGAAA GCA  
TAATAGCAT ATCC TATGCCGAAGC TTTCAATCACAACATAAG ACCCATCAATATGAGTCAAAGTGCC TTT  
AATAT ACTC GTACAT GAGTGCCTAATTC TATCTGTTATACAAGAGTCTTC TTTAAA TCC TGATAAGGAGC  
GAGATGTGCGTGGCACATGGC TAAA GCAAAGGC ATCCGCTATATCC TCATTATCTTCTGC TAAA AGATCT  
GGAACACGCAATAA CAAA CTACCATTAACTGTACCTGCTTCTTAGAAGCATTGCC TTTACCC ACAGCAG  
CTTT TTTAGCCGATTTGGGAGCGT ATTC AAATACAGGGACATCC TG TAAAGATGCCGCTAATAA TAAA AC  
ACCTCTAGCCATTC CCAGCTTAATGGTAC CAAA GGGATT TTTA TGACGTAAGTCTCT TAAA ACAACA  
GC TTTA GGAGACTC TTGTTGAAGAAT TGTG GAAA TCTCTGTAAA CAACTGTTTA TAACGATGAGCCAAAG  
CTAACTTCTGAGAGAGCTTAACC TTTCCAAAACATATGT GGGTGAAT GTGATATCGAT TTTTC TACCTTAAT  
CAACGCGT ATCC ACAACTAACGTTCC TGGATCT ATCC CCATGATCAAATCAGCCATGCC TTTCTTAACA  
CTC GCGTCTTGTCTAT TTTCTATA CAAA TGCAAAT TTTA CACAAT TAAA GAAA GGGT TACTAACAAAATCA  
GGAATCTCCAAAAGGC TTTA CTATCAAACCTCTC TTTTCGCTAAA AAGCGATCTA CAAA CTCTCAAGT  
ACTCGAATCTTATGTTTATAACATAGCCTACGGCCTTGCCTGACTTCCATCTGCTGAACAC TTTCAACTA  
AATCAGC TTTCAACTC ATCGATCACATCAT CAAA ATGACGCGCTTGTGTAAT TTTCTGC TAAA CGATC  
AAA CAACCAATGAT TTTCTGCCTGTA TTTAGAAA TCTCTGTGTA CAAACAT TTTCTTGAGATGCCAAT  
TGAGA TTTTCAGCTCACAGACCTGTGTTCCC ATTC TGCTAATGATTGTTCT TTTACTC GCAGATT GGACAA  
ACATCTGCTTCTTG TTTCTAAGCAAATCTTCGCTCATT CAAA AACAAACACCAAACAACATCTGACAAGT  
ATTC TCCC ATTC CACAATATCA GAGTCT TTTCCAAAGACAAAACAGCTGAAGCATGGAACGA GAATATTC T  
TCGTATTGATCAGGAGAAG TAAA TGCACGAAC CAAA C GAAA CCGTAACAAAGACAACAGACGTAGCTTAA  
C TAAA GACCAAAGCCACATCAAAGAGAT ACCC CAAGT TAAA TAGCTCTCCTCATCTA TAAA TCAAAAAGG  
TATTATTGTCTCAAGAACCAGA GAAA AAAGATGTGCTCAGAACAAG ACTC GAACTTGCACGGGCCAAAGC  
CCAAG GGAT TTTA AGTCCCTAGTGTCTACC ATTC CACCATCTGAGCAAAAACGACGAGG ACCC TAAA GAG  
TCCTCGCCACAGC TTTA CAAGAAGTTCTAGCACGCACGACTG GAAA AGCTACAAT GGATTGTATGT TAAA  
GTTT TAAA AAAAAAGCAATGAACTTCTT ACTCTTCTGAA GAAA TACTGTATGAACAG GAGTTTC TTCTAA  
TGAAA GACTTGGCTGCTCTTGAG ATTC TTCAGCAG CAAA ATCTT TTTCTTTAG TAAA AACAAACCGTGTCC  
TCATCGGC TAAA ATAG ACTCAATAACATTTGCAAC TTTCCGCTGACTAAA GCG TTTA GAGACTCA TTTAAAT  
CCACTGAAGTACAGGCTGAG ACTC TTCCTC GGGT TCTTCTGGACCATCAGAAA TCAATCGAGTAGGAGG  
AGGAAT CAAA GAAA ACCGTGCTCACT GAAA TCGCTTCTCAGAAGAGG ACTC TTGCAAAC ATTC CTCT  
GCTACGGTGTGATCATCTCTTGAGAAGATCCAACAGCATCGGCAATCTCT TTTACTA TTTTCGACGACGTC  
CTTGTT TTTCTT ATCC TTCCA TTTCTC ATTC T TAAA CTCT TTTCTGTCTCT TTTCTTAGACATTGGAGC  
TACAGGTGTAGAAGCGGGAGCTGCAACAGTAGAGT CTGCAACTACCTCTTCTTCA GAAA CAATCGTATTA  
TCTTCCGATACA GAAA CTATTGGAGCCACCTTCGGCATC TTTAG TAAA GCTTCCC GACTACCAACAATCT

TGACTC CACGATC TAAA CCAACAGC TTTAAGGTTGAT TTTAGCATCCGGATTTC CATCACTTCATAATC  
AGATGCTGGCAG TAAA AACGGCTTACTATGATCACAATTACG GAAA AAAGTAGTCCCTCC TAAA CGGACA  
ACCTCTATAGCCTCAACGACAAA GGAT CTTGGGACAAGTG TTTC GAATTAC GAATGGATAACTTATATC  
CTTCTCTAGATGTAATAACAGTCTCTATGACT GGAT CTCTTG TAAA ATACACGAACGAACC TTTATTTAG  
AGT TTTC TTGTACGT ACTCTAA TAAA TCCACTATGC GAGT TGCATAGCCTA TTTC ATTATCATACCAAGC  
TACCAA CAAAAA AATCGATCGTTCAAAGCA ACCC CGGCTTGAGCATC GAATATAGAT GAATACTC ACAG  
CCAA TAAA ATCAGAAGAGACTACAGCTTCTTCCGTGTAGTACATAAT ATTC TTCATGCTCGTG CAAA CTG  
CATGCTTCACAGCTTCACAGATAGCCTCGTACGTCGTGGCTGAGCTCAACTTAACAGT TAAA TCTACTAC  
AGAAA CATCTGCTACAGGC ACTCTAAA GGCC ATTC CTGTTAAT TTTC CTTTAA GCTCAGGCAACACAAC  
CCTACAGC TTTA GCAGCTCCTGTGCGAAGCCGGGAT AAT ATTC T GAAA AGCTCCTCT ACCCCCTCTCCAAT  
CCTTACGAGAAGGGCCATCAACCAC ACTCTGCGTAGCTGTTGCAGCGTGAAGTGTGTATTAGCCCTTC  
TTCTATACAAAAT TATCCAATAGAAC CAAA GCCAAAGGAGC TAAA CAATTGGTAGTACAGGAAGCATT  
GAAA TGATGACGTCAGCT GGGT CAAACTGCTGATGGTTAACTC CCATAACAAACGTAGGGACATCGCC TT  
TCGCAGGAGCTGTGATCAACACTC TC CAAA CTCCAGAGTCCAAATGC CAAA CAGCATC ATCC CTATTGAC  
AAACAATCCAGTAC TTTC GACGACGACATCAACATCCAAATCC TTCCAAGGAAGCT CAAAAACGCTTT TT  
TC CGCTAAGAAA CGGATC TTTCTTTTC TCCATAACCAACATCCATCCGAAA ATGTTGCTTGAGGAGCGA  
AAGATCC GTGTGTG GAATCATAT TTAATAAAA TATGT TAAA AGATCTCCTGCGAC TAAATCATTAATAGC  
TACAAC TTCTATGGGAGAATTCCT TTTCAGAAT CTGTCT TAAA ACTAATCGCCCAATCCGTCCAAAACCA  
TTAATCACAATTC TCATTGC TAAA TCCAGGTAGTCAGTGT TTTCGAAA AATTAGCATCACTATGC TAAA  
AATTC TATGATACT CAAA AGCATTATCACCA ACCC TAT CAAA CAACTTCAAAAATGCGCGTAT ACCCGC  
CA TTTC TCGAAGAAA ACCTGGTTGCTAACACATCAAATAACTTCCCAATGACTC TTCTATCAACATTATA  
AGCAGACAAATCTCCAGC TTTA ACTTGCGAGCCTC CAAA CTAGTCAACGTATTATATCTGACCATAAGA  
CGCCCTACAGCTAATCTTCTTGACGCTAAGGTATT TTTC TTAGC TAAA GTAATCAT CAAATCTGCATGCC  
GACGCA ACTC CAAA GC TTTA AGGCAATGTAGTCTCT ATTC TTTC ATTGT GAATCAAAGACTTCAACATATT  
AGCCAACATGCAACGGTTATGAGACGAAGTACGACCAACCC TAAA TTTT TTTC TAGCGTGTGCATATCT  
CTT TTTA TCCCTTGATTT TTTA CTC GACCGAAT TT TTTC GGCATACCACCTTCATTT TTTCTTTA ACGTT  
ATCC AGACCAACACCAAAC TGGCTGAGGTCCATGCCTAACTC TAA TTTCATTTCTTT CAGTTTA TTC TTA  
ATCTCGCAGAGAGACTTCTTCCC GAAATTTCTAAA TTGTAACAGACGAGGCTCTGGCATAATTACCAATT  
CCCC TATCG TTTC GATATTGGCATTAGATAAAA CAA CAAATAGATCGTACAGAAA GTTCTATCTCATTAAAT  
GCC TAAA ACCAAT TTTA TGAAGAAT ATCGTCCAAA TTTCTTTTC TCTACAGAGATTGCTTCTTCAAAAACG  
ATTC TCTTCTCGTCCATTT TTTTCGAAA ACAGAAA AATGCTTACTC AAAATCTGTGTAGCAAAAAGCTACAG  
CTTC TTTA GGAGCCACACGACCATCGG TTTC CACTTGCAACAC TAAA CGATC GAAA TCTGTATCTTGTCC  
AACGC GGGT GTCTTCAACAAAATAGTTAACAGAAAACAGGAGAGAAT GCCGCATC TAAAACGATCTCA  
TTC ATGCCTC TTTC TTCAAGAACG ATTC TTTC AGAAGGAGAGTATCC TCTACCAAAAAGCAACTC GCAACA  
TAACCTCAAGTTGCATTGGACGCGTGACCG TAAA AATTACGTGCTCAGGAT TGACCGCTTCAAAAAGTTCC  
TTCTGTAGCAAATCTCC TAAA GTAAC TCTTCTGCCCACCAGCAGCAGC TAAA TC GGATGCATCAACA  
GAAA TCGTAGCTCGTAACT CAAA AGAGCATCTTCCACCTTCACAATCTGTAGAGGAT ACTTT TTTA AGCA  
ACGAACC TTTC AAA TTTC AAAACGATATTGGTAACATCTTCAATGATCC CCTCTACCGCCATATATTC GTG  
CAAAA CTCTGTGCATAGAGAAA GAGACAATAGCAGGAGCTTCCAAGCCGATTAACAGAGCACGTCGCAAG  
GCGCTTCCCAAGGTGTGCCCC ATCC CTT TTTC CAAGGGATCTGCAACAAATCGAGCTAC TTTA TCAATGC  
CGCCAACAGCCCTTCCACAGGAGACATCTTACCAG ATTC AGGCAACTCAAA CAAA TTATAAAG TAAA TT  
GTGTGAACT ATCC GACATCCAAA ACTC CTTAGCTATAACTAC ACTC TTCGTCTGTTTC TTGGTCGAC ACC  
CGTTATGAGGGACGG GAG TTTC ATCTCGGATAACG GAAA CGATAAGCCAGAAA GAAA TTAGCGCTCGCAC  
AGCAG ATTC CCGCCCTGCACCAGTTCT TTTA AGCCTACTTCAACTTCT TTTAATCCAGA ACTC ATAGCA  
GCCTTAGCAGCATCTTGAGCGGCAACCGTTCGAGCAAATGCTGAAGA TTTA CGAGAACCAGAAAT AACCAA  
C TTTC CCAGCAGAAGCCCAT GAAA TCACATTACCAGCA GGGT CTGTTATGGTTACAATTGTATTAT TAAA  
AGTAGCCTTAACATGGACAACGCCGAAG GAAT GTTT TTTA CTGT TTTC TT TTTA CGCCTCTTT CAAAC  
GCTTGATT TTTA ACCAAA ACTC TCTCC TAAA AATTATTA TTTC TTCTTACCTGCAATAGT TTTA CGTT  
TACCC TTACGCGTGCGA GAACAAA TT CAA TTCTCTGACCACGAACAGGCAAA GAAA GTCTATGTC CAAA  
TCCACGATAAGCAT GGATAGTAATCAGACG CAAA ATATCAGATTGCACACGACGGCGCAAATCC CCTTCA  
ACAACGTAATCC GACTG TAAA AGAGCG TTTA GTGACCAACCTCTTCTCAGTCAACTCTGCAGCTCTAG  
CTTCG GGATTC AACTGCAATCTAGCAATAATCTC TTTAGAAA GAGCTGGCCCT ATTC CATAAA TATATGT  
AAGACTTATT TTTA TTTCTT TTTC GCAGGAATATCT ATTC CAATGATGCGCGGCATACGAAGGGCCTCC

CTTAAAGTAGTATAAGCATCTTAGGTCAAAAATTGTTATTTTTCAAGGTCTTCCCAAAGGGCGGTCCTTTC  
TTTAAACTCCGTCATAACGCCGGACTAAAAGGAAAGCATCAAACAATTTCATCGTGTCCAAGATGACTC  
CGACTACGATCAGCATGGCTGTTCCACCCAAAAAGTAGCTAACGTTTCGCGTCAACTCTCAAAATCCCTTCC  
CAAAACGGAAGGTAATATAGCTACAACAGCTAAAATAACAGCTCCTAGCAAAGTTACCCTATTCATTGTG  
TATTC AAGATAGGCTGGGTGGTTTCCCTTGTCTAATGCCAGGAAATAACGCTCCATTTTCTTCA  
CAGAAGCTACAACTCTGGACGGAACGCGTAGCTGTCCAAAAATAAGTGAAAATAATAAAGCAACAC  
ATAAAAATGGAATACGCCACACTACCTGGGGACAGCATAGTCGCAATGCGTTTCAACCAAGAAGATTCC  
GAGGAAAGAAACTGCCAATCGTAGCTGGGAACATGAGTAAAGAGGAAGCAAAAAATAACCGGGATTACTC  
CAGCATAATTCACTTTCAAAGGAAGATACGATCCCTCCTACAACCTCTCTCCTTCCAATAATTCACG  
TGCATGCTGAACAGGAATTTTCTTACACCTTCAATAATGAGCACAGTTGCTATAAGAACAAGACAAAA  
ACCGCGCAAAGAATTAAGAGCGAATTCAGAAAGGATCCGAGATCCCAAATTTAATTGT  
TAAATATAGACCTAAACGGAAGGAAAGAGGGCTAATATCCCGAGAGTAATGATCAAAGTATTCATT  
ACCAATCCCAAATCAGATACAACTCTCCAACCCACATAAGTAAAGAGTCCCTGTTGTCATAACCACA  
ACAGTTGTCAAAATAATACCAAGGCACCCCAAACAGCTTTAAGGACAACATTGCTGGCAAAAACAATCC  
CTGGAACAACAAGATTCATTCGCAGAGCAAATCAAACAAGCAAGACTGTACACAGGCTAGAACAAG  
AGTAAAGCCGTGTCATTCGTCTAAATTTACGCTTCCCTTGATCCGGCGACTCTCGCATTTCTCAAAC  
AGAGTCGGCATAAAGACGACAAGAAGCTGTACAATGATTGAAGCCGAGATGTACGGAACAACCTCAAGAG  
CTATTACCGTCACAAAGCAAAAGCTCCCCAGAAAATATGTCAGCTAACTGAAACAATCAAAGCTAGA  
CCCAGCAATTGGTTAAAGTAGGCTACGGCGGGTCTCCGTTAATTCAGGCACAGGGATAAAACACCCCG  
ATTCACATAATGCAAGCAAGGAAAATGTGAAAATAATTTCAAATCGCAGTTTCGAAATCGAAAACACTT  
GTCGCAATGTAGCCAATAACTTTACCATAAGTTCTAGTTAAACAGCCTCGATAAGACTTTTTACTCCTT  
CTGACAGCACTATTGCAGCATCTTTCAGACTAATTTCTTATCCAGAGCTCCTTTAAGGATTACTTTAAC  
ACGAGAAGTCTCTCTATGGATAACTTTTCTTTCTTTTAAAGCTTCCAAAGATACTTCTGCGCCATTGTCA  
AAAATCTCATTCAAACGTTGTGTTGTGATTTCTTCAACACATTTATCAAAGCGTTATGAGAAAATCCTC  
GTGTAGGAACCTTCTGTATAAAGGTACGCCTCCCCCTCATATCCGAAACGCTCTCTTGTATCCAGAACG  
GCTACCGTCCCCCAAATGTCCTCGACCACTTGTTTTCCGTGACCAGAAGAAGGTCCTCGGCCCAAAGAT  
TTCGTTCTTCGCTTACGAGGCGAAGGATCTTGTAACACTCTAACTTAATCATTGATAACGGCTCTCCTT  
TTCATAATATCATCTTTACAAGAGAGTGTGAGGAGAGCTTTTAAAGCCGCTTTAACCTGATTCATAGGAT  
TATTGGATCCTAAACTCCAAACCTACAATGTCCTTTACCCCGCCATCTCTAAATCAACCGAATACGAGA  
TCCGTGCAACGATTCGTTTCTGGCTTAGCAGGTTTTACAGAAGCTCTGCTCCATCATGATTGACAAGA  
ACCTCATGAGGAATAGATCCCTCCCTCAAGAGAATGATAGAGACAAGATTTTTCGAGCAGCATCCAC  
CTTTACGGATGGCATCAGTTAGCTCGTTAGCTTTCGCAAATCCGAAGCCTAACGCCCTTTCTATCGCC  
AACATAAAGCGCAGAAAACATACTTACGGCTTCTTTACAACCTTACAACAACGGTTGACGACG  
AGAACCTTCTTCCAGCTGATCTTCTTATGAAATTTCTTGTAGTAGCATTATCTAAACCTTCAATTA  
AACTGTAATCCACCTCTCTGGCTCCATCAGCAACCATAGCTACTACACCATGATACTTATGAGCTCCT  
CGATCGAAAACAACCTGATCTACTTGAAGGCCTTTCCTAATTCAGCAATTTTATTCCAAAGCCAAAG  
CATTATCCGTGATTTTTCAGTTAATCCAGAAGTTCAAACAACCTTAGCCAAAGTTGAAATAAATGCTAA  
AGTTTTCCTTCAACATCATCAATCAGCTGCACATAAATCATGCTTAAATCTTTACAACGGATAATCTG  
GGCTTTAAAGAATCCTTTAAGGCTTTCGCGACTCTTAAAGCTCTACGAGCTTTCCTCCGAAGTTTCT  
TATAAAGAGCTTTCATAGTTGACTCTACTTTTACCTCTATTTTACCAGTTTTCGCTGCTTTC  
AGCCTTACGACGAACATATTCGTTCGTAACGAATTCCTTACCCAAATATGGTTCTGGAGGGCGTCAA  
ACACGAACACAAGCCGCAAATTCCTCAACTAACTGCTTATTGATACCCTTAAATGGAGATCAATGTGTTTT  
TCTCAACAGAGACTTCTAATCCCGTAGGAATAGGCATTCAAATAGGGTGAGAAAACCTATTGACAGATC  
TAACAAGGACCTTGTACTGCAGCTCTGAAGCCGACTCCGATCACTTCTAAACGCTTCTCAAATCCAGTA  
TGGACACCCAAACCATACAACTATTAAGGCCAAATAAGCCCTTGCATACGACCAGGTCTGTCTACAA  
CGTGAGCCGAGGAGCAACAACACCTCATTACCCTTACGGCAATCTCAACTTCTTACGCAATACCTG  
CGTCAAAGACCTTTAGGACCTTTACTGAGATTCATCATCAAATAGAGACCTCTACGCCTTGGAGGA  
AGCACAATAGGGTCTCGAGCTTTACGAGACATTCGTTACCGTCTAATCTTTTAACTACCAAACCA  
AACAAAGCAATTCGCGCCAAACATTCCTAGCCCTTGCTACAGAGCCTTCAAACCCCTTGGAGGAGTCA  
AAGAACGGCAATACCTATAATTCCAAATACATAAGGAATCAAACCTGCAAAAATAAAACCTTCTAGAA  
GGTTTGAACACACGCTTAAAGAGCATGAATCACAGGCTACGATCTTCCCCGTACCGCAAAAAGACTCTCA  
TTAGTCTCAAACGATTTCTTCTTTTCTAAAGAGTGAAGCAACGAACCCGTGCTGCTTGAAGATTCCTTAC  
TATTGCTTCAAGCATTTACTATGCTCGATATCAATGTACAAATGCTCTGCCATCAAAGCATTTCCGAATC

CGTGTCAA TAAACAA CGATTGAAT CACTCGTC ATTC CCATACCGACCTACATCTCCCTTATTGAGCCTT  
CTT GAAA CGCAAGCCATAC ACTC TAACAAGGTAAGGC ACTC CGCATCGG CAAA TGCTGTAGTT ACCCAA  
GTAAT ATTCATTC CCTGAGATCG TTTAACACGATC TAAATCAACTTCAG GAAA GA CAAACTGATCATCTA  
AAACCAAGGGAATAAC ATCC TCGTCCATCTCC TTTA CAAGAGAATCC TC TAAAGTCTC GAATTC TTGGGGA  
GACAATATTGCAAAAACGGTCCA TAAA GTCATACATAC GGATTC CACGTAGAGT GACT CAAA CTCCGATG  
CCCTG ACCCTCTCGTAACTTGAAGCCTGCGATAGAGT TTTAGCTCTTGTTACCAAAGGTT CAAA ACCAG  
AGATAACCGCCA ATTC CTC TAAA TGAGCCTG GAAA AGGTT TTTA TCC CAAA CAGCCTCTGCAAGCCCAT  
GCTTATTACGATCTTCTTAAGAACAG GGACAAA CATTACAT TTTA TACT GAAA CTTATCTTGAA GAGTC  
TTTC TTATCTCTTCAGTATATAGT TTTAACCTGCTCATATTA ACCCTTTTC TCTCTTTACCAATCGG  
TATAATGAAGAACTTCCATCG GAAT GCTTATTC CAAAGCTCTCGTCC TTTTC TCTGTAAC CAAA ACAACA  
GTCTAGCAGGCTGATTATCGATACT TAAACGTACGTTA GAAA TATGGAGAGGAGCCTCAATATTAATGCG  
CTTCCC TTTAGGATTC TCTTGAGAGCG TTTA ATATTT TTTACTC GGACATTGATT CTTCAACAACAACC  
TT ATCC TTCAACAACG TAAAC TTTTC CTTGCTTACC CAAA TCG TTTTCAGCAAGCACATAAAA CAGTGT  
CACCGACACAAACACTACGTCTCTTCATACTATCTTACC TTTAAA TCACCTCGGGAGCCAAAGAGCTAAT  
CTTAACAAAGCCTCTGTCTC GAAT CTCCCTTGCTACAGGCCCAAAA ATTC TAGTTCC TTTAGGATTGCC T  
TTA TCATCGATGATTACACAAC TATTCGTATC GAAT CTTAGTGTAGAACCATC TTTA CGATGGATATCGT  
TTTC GAGT CCGTACGATTACAGCCTTAACAAC ATCC CCCTTC TTTA CGAACTATCAGGCTCAATATCTCT  
TACAGAGCATACAATCACATCACCGACCGTTGCATAACGTCGACGAG ATCC GCCTAGAACCCTT GAAA CAC  
TTAAC TTTTC TTAGCCCTGTATTATCGGCAACT TTTA ACTGAC TTTTC TTGCT GGAT CATAATTGC TAAAC  
CACTACTAA TTTA CAGTCCGACA ACCCGCCATCTCTTCGT TTTA GACAAAGGACGCGTCTCTTTGATTCC  
GAACAGTATCACCTTC TTTTCACATCCA ACTC ATTATGCGCATAATAC TTGCTA GAATCCCTAACCACCTT  
AGCATATTGAGGGTGC GAGTATACCC TTTTC GACTC GAACAACAACAGTTTTTTTC CATT CAAA ATGAGACT  
ACTACCCAAT CAAA GTC TTTTC TACGGCCTCTCACATCACTAGCCATGGACTCTATCC TTTT TTTTC TTGT  
TTTA TTATTAGAGCAGGCAATGCT TTTTC TTATACAGAGAAA ACTGAT GAGT TTTTCACAAC TTTA TTCT  
GTAAA GCAGCTCCGCACGCAAAGCGAAGAGAGCTTT TTTA TTATCAC GAATAAA CTATCCA ACTCTTC  
AGA ACTC TTCTCTCTAAGCTCCGCTAA TAAATTC TTT CAAA CTCCATACTATACCC TTTTC CACACGCTT  
AACAAATCGTGTCTA ATTCCTAAC CAAA CAGCAGCTCTTCTCAAAGC ATCC TGAGCATCTTC TTTTCGAA  
ACG CAAA CCACTTC GAATAAA ATACGTCCGGGACGACAACAGCT ACCCAGTGATCAGGAGCTCCCTTAC  
CTTTA CCCATTTCGAG TTTTCAGCAGGTTT TTTTC GTTAC ACTC TTATCTGG GAAA ACTCGAATCC AAAC TTT  
CCC TTTACGT TTTAAA TATCTGTTGATAGCA ACCC TGCATGCCTCAA CAAA GCGGCTGGTAATCCATCC T  
CTTTTCAGAGTCTGC ATTC CAAATTC GCCGAAGTCAACAACGTTGCTCCCTT ACTC AATCCAGCAA ACT  
GACC TTTTC TGCTGCTTGC GAAAT CAAA TTCG TTTA GGCATTAACATAATAATTC ACAC ACCCTTATAACC  
TGCTGCACTACGCAGCAGCTGTTGAAGCAGCACCTGCATGATTAGCCGAGGAACGGCCTTCT TTTTCAC  
CAAGATTA ATCC AAAC TTTA TGCCGATA ATTC CATAAGTAGTCTCTGCAGACGCTGTAGCATAATCAAT  
ATCTGCTCTGAGCGTATGAAGAGGCACAGCCGTTCTTATACC ATTC CGACCGAGCAATCTCAGCTCCA  
GC TAAA CGACCA GAAA CCTGAACT TTTACTC CCAAAGCACCTGC ATCC ATTACAGATTGCAAAGCCTT TT  
TCATTGCTCTTCT GAAAGAAA CCC GTC TTTTC TATCTG CAAA GCAATACCGTCTGCGACGAGCTGAGCGTT  
AAGCTCTGGGCG TTTA ACTTCTGCAATCTCA ACCC AAACATC CAAA CCTGTTAGCTT TTTTCAGCTCGGC T  
TTTCAGAG ACTC TACTTCAGCCCC TTTTC TTCCCGATTACTAATCC AGGTCTAGCAGTAT GGATAGTAACTT  
CAAT TTTA ACCGCTCATACG TTTAACAAC GAATCC CGCAGCACCTTGACAAGAAGG TTTTC TTCTTCAAAA  
TTCTCTAAT TTTTCACATCTTCAATGAGAAAT TTTTC GAATTC TTGATT ATTC CCATACCACAAAGATCGC  
CA TTTTC TTAGTAACCGCTGTGCGGA ACCCTACTGGAC ATCC TT CAAA ACCCATAACCTT ACTC CTACTGCC  
CTCTCTCGCCAACAATCACAGTTAGATG ACTC GTGCGCTTCAAAAATTGGGGCTCTTCCCCACG ACTC TT  
AGACTTC ATTC T CAAA AACATTGGGCCGGCATCA ACCC GAACTTCTAGAACACAAAGAT TTTTCAGT TTT  
ATAT TTTTCATTGG ACTC TGCA CAAA CAATAGCGCT ATCC AACACTTT TTTAAGGCATCTTCCAGCCTTCA  
TCTGAGAAAAGCT GAGT TGCTGTTGAGCTTCAACAACACTACGG TTTTC TATCAATCC TGAGC TAAA CG  
AGCC TTTTC TTGGCTGA ACCCGTATGTATCGGGCTGTGCG TTTAAA CATAACCTGTCTCCTTATGACTT AC  
CC TTT TTTAACGGGAT GGCTCT TAAA ATTC TTGTTGGAGAGAACTC TCCCAACTTGTGTCCAACCATAG  
TTTC TGACACAAAGACCGTCAAAA TTTACGGCCATTATGAACCTCAAAGTGTGCCAATCA TTTTCAGG  
GGTAATCATAGAACGACGAGACCAGT CAAAATTG GAGT TTTTC TTCTCAAAGCGTTCATATCTCGGACC  
TT CAAA AGAAGGTGATGATCAACAAAAGGACCT TTTTC TTAGCGATCT ACTCATAATCCCTA TTTTC CTCT  
ATCC TTAAC TATCC ACTTATT ACTC TTACGCTTATCAC GAGT TTTTC AATCC TTTTC GTGACTTTA CCC CAA  
GGGGTCTGG GAAA TGTATCCGTTATGACGCCCTTACCACCTCCGTGT GGGT GATCAACAGGGTTCATAG

CTGTTCTCGAACTGTTGGCCGAATTC TTTC CATCGACGACGCCAGC TTTA CCGTCTACACACAGATT  
GTGATCTGCATTGGAGACCTCTCCGACAGTAGCTCGGCACA TTTC ATTCAACATAC GAAATTC GCCAGAA  
GGCATCTTCAAAGTGACGT ATCC AGCTGT TTTA GCGATGATCTGGGCT GAAA GTCCGAGAG GGAT GCTCTTAA GAGT  
A TTTA CCC CCGGAGCCAGGTCTCATCTCCACGTTATGAACA GAAA GTCCGAGAG GGAT GCTCTTAA GAGT  
CATGCAGCATCCAGT CAAAAA GGACTTCCTTCTCCA GAAATCACACGATCGCCTCGCTTAATTC TTTA  
GGAGCTA GAATATAACGCT TTTC TCCATCTACATA ATTCAATAGAGCAATATAAGCAGAACGG CAAA GAT  
CAT ACTC CACAGAAGCAACCTTCGCTTCAATACCGTC TTTA TTACG CAAAAAGTCGATC ACTC TATAATG  
ACGCTTT ACTC CTCTCCACGATGGCGGCAG GAAA TATGTCC TAAA TTATCTCGCCCTCCAGAGCTCTT C  
AAAAAA AAA GAAA GCTT TTTACAAA GACGAACACTTCTTCTAGAACTAG ATCC TTTA ACTC TCCTT GAG  
TAGTAAGCTCATCAAAGAAGGCA GAAT TAACTGTCTCGTCCCGG GAGT TACTGGCT TAAA CTT TTTAAA  
CATGTT ATTC TTCTCTCCTTC TTTA CTAACCAATA GAGT GACCATCAACAAAAGTCACAATAGCCTTCT  
TAAA CCC TCGGGTTCTTCTCCT TTTC TTCGGCCTCG GAAT ATTC TTGTAGGTTGAGG TTTAACACACATGGT  
G TTTA CTTT TTTA ACCTTACACC TTTAGCAGAA TAAA TTGCTTCTATGGCTTCAGCAATCATAGGCTTC  
GTGGCGTCCCAGCAACAA TAAA TGTGTACTTAGGAT CAAA CAGAAA CTGCC TTTC TT TTTA CTTCTC  
CGTCCCAGACTC AAGCCTTCCAACATC CAAA CTTCTCGGTACATAATGTCT CAAA ACAACATCATA  
AGGATC TTTC ATATCC TCGCTTCCCC TTTA ATCT CAAA TTGTAGAGACAAG ACTC TCGACAAGCAATTCT  
AAA GCCT TTTC T GAAA CCACAATA TTTC TAGCAGCGCAATATCGT ATCC GCTGAT ATTC TCTCCGTAAG  
TAAA TCC TCTTACAGCAGACAAATTACGCAC ACTC AGTCTCAA ATTCTCATTGCTTCCAACATGAGCTAA  
GCTGTCAACGAACAAT ACCC CACGGC ATTC TACGTTGC ATTC TTTA AGAAT CT TAAA GCTTCT CAAA TC  
TTAGGAGC ATCC AAGCTGCTAACAACACAGAGT TCTCTGCAACAATCAGCTTGCCTG CAAAAATTT CAA  
AAGCCAAAAGCAACC GAATAGCCGCTCTTCTCTCTT CAAA TTGATAC GAATATGCTGATCAAAT CAAAG  
CTTAGGACC GAAA ACAATCC CTCTCCTCGGAAT TGAGGAGCTGCCAAGCAACCC TGACGGGC ATTC CCC  
GTCCCTT CAAA TC TAAA AGGCTT TTTA GTGGAAT GGCTAACTCCGATCGTCTCTTGTGCAAGCGCTCC  
ACTGACG CAAA TTGGCCT GAAT GGCCACTAGATAATCT TTTA CTGACTGCTCTCTCCCTTCAG TAAA GAA  
GGCATCAGGCAATTC AAACCTCCCA ACTCT TTTC CAGAAA AATCAAAT CAAA ATAATAGAACCATTAGG  
ACCTCT ACCC CTCT ACTC CGAAGAAGCTTCACAACAACAAC GGATCC TTTAAA ACCAGGAAT TGCTCC  
CTTAACGAGCATTACC TTTC ATCCA AGTCAACT TTTA C GACTTC TAAA TTCT TTGACCGTAACCC GATCA  
CATCC CATGTGACTTGACG TTTA CTTCCGGGGAAA CATCGGCCAG GAGTAGATCGC ATCC CAATAGATC  
CTGCATGACGAT GAAA TCC AGAACCGTGGCTT CAAA GTCTCCTCG GAAACCAAATTT TTTC ATC CCCC  
TTGGAAGCC TTTA CCC TTAGAAA TTC CACAGATGTCAACGTTAGAT ACTC CGTC GAAA ATTTCT AACCCA  
AATTC ATCGCC TAAAGAAA CAGACTGAACAGCCTTCTTCT GAAA CGACAACCTCT TTTAAA ACACGACAAG  
CACGTCCTCCGGACTTCT TAAA ATGTCC GAGT AGTGC CAAA GAGAAA CGCT TTTC AATGGTTT TTTC TGG  
AGCTTGGACTACATCAGCTCCTA CAAA AACAGCATTATAACCATCTGAAGATGCGGT TTTC AGCTGGGCA  
ACAACG CAAA CATCTACGCTAATTACTGAACACGCAACAAGA TTTC ATTCTTATCGAAGACATGCATCA  
TGCCTTCTTTTTC CCTATTAGGCTAAGCTGAGACCGCATA TTTA ATTACCTTATCACACAACCTTGACAA  
CGCTTACAGACCGCCCCGGTGCCTAATTACACT TTTA GCAAACGGCCATGCCCTCC ACCC TGCAAGAG  
CGA TTTC CACGA TAAAGAAA AC GCGGCTCCT TAAA GCAAACAAGGCGGC GAAT GGGCAATGGTATATGA  
CCTGCGAC ATCC ACACAAGAGATT TTTC TTGACGCTAA GAAATCC CACACCAAAAATCGCAAAAACAAG  
CCT GAAA AATCGTTCTAGGT TTTA CTAGTGGAGCTTCTTGGAAGAAA ACTTATAACGCTT ATCC AAGAA  
AAT TAAA GGGACAGATTATCAAAGGAAGACGATT TTTA CAATAAGAAA AGCTAAGCAC CAAA TAGATAAA  
AAAGGCTG TTTC TT TTTAGAAA CAGCCTT TTTC TTAAGAAATTTAAA AATCC CTTAT ACTCTGTTGCAG  
AAA GTCCACAATCC AATAACTGCAGAAGTGAACGTAC ATCC CGCAGCCACAATTGAC GAATACCC ATTG  
TAATAGGCAACGGCACCA CAAAAA ACGTCCGGCAACGC ATTC CAAA ACTTCTCGAGCATAGTGAG GAG  
TGCATACTTGATGCGCGTGAACGTCTTGGC TTTC TCTCCAGCG ACTC TCCTCTCGCAAGCAT TTTC CTCT  
CCCGACA ATTC GAGT GACG ACTC TTCTCTCGCAATACGAGCGCAGCGGGCTTCGCAATCTGCTC TTTC CG  
CACTGATAGCGAGT CCAGA ACCC ACCACAAACGCTGCATGGTTAGCCGCATAATATAGCTAACAGAAGA  
TCC CATA CAAA CTTAG CAAA GGAA GAAAGAAA CGGTTGCGCCAGCAT CAAA TTGACAAACAGAAT CGGA  
CGGAT AGCTCC GAAT GTGCGGAGGTAGGTAATTC CTCCGATGAAGCTACAGACAGCCGAGCCGCTCTGC  
GCTTATGAGACACACAAAGATCTGCTACGAGCCCCC ATCC CCTTCTTGCGG TTTC TGACTAGCAGC TTT  
CATGTAAGAGAAGAAGC CAAA CGCAC CAAAACTGTTCTGGCAACGCTCCGT TAAA GGC ATTC CC TAAA  
GCGAGAACAGTTCTCGC ATCC CCTAATCC CAAA GACACTTGGGAAGCTGTAATGTGTGCGGAAGAGCCCG  
CGCTCCAGCTTGTTC AAAATA CAAA CGGTCAATTC GGCAGCAGACTTGGCGACCTTAACAGTCTT ATC  
CATTC CCTTCGTCTTA TTTACT ACCC TTGCCAT TTTA TTGCTGGGCTGTG TAAA AAAAGCT TTTAGAGCA

TTCCTGTACCAGACCC TAAACGTCACATATAGCAGCCATATTCACCTACCTGCTTCAAATTTATGTAC  
ATACAAA TTTAGAGAGACATTATACCACTTCTATTACT TAAATC GAAAAG GAAAACGCAGCAA ACCCT  
TCTA GAAAGGCCTCTCAGACCTA GAA TAAAAAATAT CAAA ACTATCTAGAGGCATCAAATCTTT TTTAG  
AAAAGC CAAAAA CCAACCTTGATTGGCCGT TAAA AAAATCT CAAAC TTTTCATCGAAGCTTTTC CTTCTG  
GCTGAACCATACGCAATCGCAAAGCTCCTTGACGGCAAGCGATCAGCAA ATCC TCTCCA GAAACTC CAAG  
GACTTCACCTGGATCTCCATAATTGCCAGA GAAA GATTC CATTC TAGCAGAGAGCACGCCGAGACGGCGA  
GCCTC TTTCCCTTG GGATAGATAGC GAGTCCAAGCGCCCGGAGCAGGCGAG ACTC CCC GGATATGCGCGT  
ATACTTGAGAAGCTGGAGC ATCC CAAT GAATCC CTCCCTCTTCTTAGTTAAT TTTAGGAGCCAGCGTAGC  
CATCGCTTCAT CAAA AGGAACATGGCGCACTGTTCCGGCCTCAATCTCTTG TAAA GTC TTTA ACAAAGC  
TCTCCACCAGAGGCGGC TAAA GCTTCGGCTA ACCC CCCTGCAGTCATATCTTCGCCAATGGCTACATAAT  
TCACATTAGCTAT ATCC CCAGT ATCCATCC CAGCGTCCATAC GGAT CACCGTG TTTCC CAGACAGA ACTCC  
GCC ATCC ATAATACAACGCT GAAT AGGAGCTGCTCCGCATATGCG GGTAGTA ACCC AGCATGAAGATTA  
TAACAACCGTATGTAG GGATATC TAAA AGCTCCTGC TTTAAAAT CACCCGATGCGACGACAA TAAAA  
CATCAGCCTGCC ATTC TCGTAATTGAGCA GAAA AGCGGGATCC GTAGTCTTAAT GGGTTGAAG TAAAGG  
AATATT TTTAGACAAGGCTAACTGT TTTACTGGAGA ACTAATCAGCTTAGACGAGCGTT CAAA CGG TTTA  
TCAGCTCGCGTAAACAACACCGACAATAT GAGTATGTGC ATCC AAAAGTGTT TTTAAA ACAGTAGCCGCAA  
ATTGGG GAGTCCCCAGA TAAA CGACTC TAAGACTC AAC GAAA GCTCCTTCTTT TTTA TCTATCGGCTCTT  
C TAAA GATGCTTCGCA ATCCACGCCTCTCTTATACCTCG CAAA CTGGCTGCCGACAAAATTC AAC GAA  
ATGGCGCACTTCAGGACTTCTCCAAAATCTTCTAATACGCTCTCCAAAGAGGCTTG GAAA GACTC GTCC  
GAGCG GAAA ACCCG TTTAAAAGTCTTAATCAATGCCAGAC GGG TTTCAAAGATACCTGCCGCCGTTGCA  
ATCC AACCTTGTTAATTC CCCCTAGAGCATAG GGAT TGCCTGTCCCTATAGT GAAA GGCGGGATATCAGG  
ACGAAT ACCGCTCATAGCTCCGACCATT GAGT AAGAGCCTATACGAACAACTGGTGCAC ACCC ACCATG  
CTACCTATAGTTACGCAATCTCCTACTTGACATGCCGGCAAGCTGTACATGCGTAC TAAA TACAACAT  
TATTCCTACAGAGCAGTTGTGTGCGATATGCGCCCAAGGCATAAT TAAA CAATT ATTCCTTATA GAAAC  
TGTAGTCCCCTCAAATGTAGAGGAGTAATCATAGCAA ACTC GCAA TTTTC GCAATGCTCACC AA TTTCA  
ACAAAAGTCTTCTCGCCCT TAAATTT CAGATCTTGGGGCTTA TTTTC CGATCATTGCAGAAGGCCAACTG  
TTGTTCTCGGCCAATGGTTGTGA ACCC GTCGATATATGCGTAAGA CAAA ACCACTACATCATCGCAAAG  
CGTTAC ACTCTTT TTTACAATAGCATAGGGCTCTATCGTCACATTA TTTCCAATCC GCGCTCCATCTTCC  
ACAATCGCTGTAG GGATGAAT GTTGGTCATACGCTTCTCT TTTA TATGG ACTCTTT TTTAACAAGAACAAA  
GCTGAGCTCTCCTTCAGCGACTACCTGAGAACCTACAAAGGCTTGTGCAAAGCC TTTCCACC TTTAGCC  
GAGAT TAAA GAGA ACTC GGC TTTCAAGGTTAATACGTCTCCAGG TTTAACAGGCTGACG GAAT CAAACTT  
TCTGGATACCTAAGAACAAGCGATCTT TTTA TCTCGATCGT TTTCAATATA ATCC CTAACAAC ACTCC  
AGCAGCTTGAGCCAAAGCTTCCAGTAT TAAA ACTC CGGCATGATAGGAGCTCCAG GAAAATGTCCCGCA  
AAAAAAGTTTCGTTAATTGTTACAT TTTCTGAGCCACTACCGAAC GAGTG TTTAAA TCGTAA GAAA GAA  
TTTTATCC ACCAA TAAA AAGGGAT ACCGATGGGGAAG TAAAT CAAA TATGTCTGTATACCTAACACGGG  
CT TTTCA TTC CAAA ACTA ACTC CTGTT CATGCTGCAACGCCTC TAAA ATTC TGTTC CCAATGCAATAT  
TGGAAGAATGCCCG ATCC CACGGCAATAACATGTGC TAAAAAAGGCGTTCCAAC TAAA GACAAATCTCC  
TAT TAAA TCTAGTAT TTTATGGCGAACAGGCTCATCAGG GAAA CGCAGCTT ACCC AAGCTAATCAGCCA  
TCGTC TTTAAA TAATACGGCATTACCTACACAGCCCCCTCCTATCA ACCCT TTTTC CATGAGGAAGCAGA  
GTTCGCTGTACAAAGCAAACGTCTTGCAAGGAGCGA TTTCTTAC GAAAAGATTC TTCG GAAA TAACCAA  
GGAACGATATTGCGTGCCTATCGTA GAGTTATGC GAATAGTGCA GGGTATAC GAAA TTTAAA CTCATCC  
GAGG GAAA TGCTGC TAAA ATCGT ATCC TGATACTGATAATAGACA GGATGAGCAAGCCTTGCGATCTGGA  
CCGCTGCTCCTGCTCTT GAATCC CTGCCTGGTCTATCAGGTCCA TAAACACCTGAGCACTACCATCACC  
TATGG GGATTTCA TCTTCGCTGCAATAGATACGCACATT ATCCACTC CGAAG GAGT AGAGCGATGCCAAC  
AAGTGTCTACCGTAGATATAACACTACCATC TAAA GACAATGTGGTGCTACGTCCC GTTCCACAAAC AT  
TCGCCAATCGAGCGG GAATATACTGTT CAGAAGCTGCATGACGAGA GAAA ACTACGCCTGTAT TTTCTC  
TGCGGGCTCTA GAGT AAGCATCGCAGCT TTTCCAAAATGCACTC CC ACCCGG GAAT AGCATACTTACGC  
TTTACGTTCTCTGAGCTCGACCTAACATGCAAAA ACCCTGACAAAAGAG ACCCGTATATT ATCC TTTTTTT  
TTTTTAGCAAGCAAGCGATATCAAAAAATTA CTACCTAGTTT CAAA ACACTTGCTATCTCAAAAAATGC  
AAA TGGTG GGGTCTC TTTCTTT TTTCTA TAAA AATAGGCAATCGCTCCGATAACCGAACAACTGCAATC  
AGTAACAGAGGAGCATC ACCCAGCCTTG CATATACAGTATGATAACTG TAAA GAGGGACG GAAA CTGGA  
GTACTC CTGTAGAAA CTGGGCAAGTTCTCGATTC CCAGGGAAGTATGCCGACAATTC TACCCAAA GAATC  
CACTGCAGCAGAAA CTCCTGTGTGACAGGCGC GAATACAAGGTAT ACCCAACTC TTGATTACGTAACATG



CCATGATAAAAATGTACTAGAGGCAGCCTTGAACGCGGATACCAACCGTCATTAGTAAGATTTACAAAA  
TATCGGCTTGTTCCTCAAAATAAGGGCGAATTGCATACCCAAATGTCTCCTCATAACAAATAGAGATCCC  
AGCTTTTATTCGCTCTGTTATATTCACAACCTCAGAAAACCTCCTCTGGCAAACGTTGAAAGGGGAAGAGCA  
AATTCGTGGAAAAAGGCAAAACACAAGAAAAACCTATTTCCCTCCAGGGATGTACTCACCTCCAGGAA  
CAAGAATCCGCTTATCATAGCTAGTTATTTCCCTTCTCGGATACGCATTCAGCAGCATTATACAAATG  
CAGTATTCCCCCTTTATTTCCATCGTTCCATTCCTATGATAACGGTGCATTGATAACGTTTCAGCTATC  
GCTTGGATCCAAATCCAAAATAATGAAAACCTCGCCCCAAGCAAAATTAGGAAGCAAACTTTCTAATACAG  
GCTGATTTTCATGAAAGGTATAGGCTTGTCTATGTAAGCCAAAAGGAACACTTACTTCTGGGAAAACGAT  
CACATCTACAGGAGCAAAAATAGTCTGGCACAAAAGAAACCAAACCTCTCCAAATAGCACTAGCCATCCTC  
CCTGCATGCATATGAGGACTATATCCAGGCTGCACGATGGCAACTCGAAGCACTTCAAGTTCGAAAAAT  
GCTTCTTTAGGTATTCGTAATGCGCTCCGCTAACAGATAAGGGAACGCGCACAAACGTCAACCAATAAACC  
CAAGAAAAGAGTGTTTTAAATAAATCATGCTGCAAAACAGCATATATTGGCAGCAATAACTAGAAAAGTCT  
TGTCAGCCCATCCAAAAAGCTGCCGAATTGCCGGCCATAGGCTGTCGCTGTAAGAGGCCAGCCAAATAA  
AATCAAAAAGAACTCTCTGAAAGCAACCCATAATAGCGTATTGCTTCTATCGCCACCCAAACCCCTGGAAG  
CCAAACAAGAGCTCCCTATATTGCTTGCACAAACACCACACAACCAAACAAGAAAACACTAGCAAAATAGG  
GTGGCGAGATAAGAAAGCAGTATACCCCAAACAAAATAGATGCTTGTCCCTACATAAAGATCTTCAAGCA  
TCCAAGAAGAAATGAGCGCCTTCGACAGTCCAAGTCCAAAATAAAGCGATGCACCAAACTTTCTTCCAAGA  
TAATTGCTCTACTAAAACAAAAGCCAGCCAAAAGTAAGCTGTAACCGCAAATACAACATAACAACAGAA  
GCTACAACACTTACATCCGGCTGAGCCAAACAGACCAGCACCCAAAGAAAGGATGATGTATGACACAGGTT  
TAAACACTAAAGGGACTCCCTTACTAGCTTACATTCAGATGAGAGAAAAGAATCCCTTAGAAGTTAC  
TTAAAGTTTTAAGCGCAAAGCTCTTCTCTGGTCTGCTTCCCATAAAGCGGATTTCTTCTGACTTTCA  
GGGATTAACCTCGGAACCTCCACAGGGGAATTGTTCAAACTTACCAGCAACGAAAGTAAAGTATGCTGAGG  
TGATATGGCGATGTTCTGCTTAATAATATTTCTGCCAGACTTTTACGCCCACTTCTAAAGAGGTTCT  
CCAAGACCGATTCACGGAAGCGCAGCAAATCAAATTTTCGCCATATAAGCAGGAGCATAAAAACGCATA  
GCATCTACAAAAGCAGTTACACAAATACTTTCGCAATGCCGTTCCGCAACCACTAATGCCAATCGATCCA  
ACAGGCTCATCAATAGCCACCAAAGATCGTGTATTTCTGTAATTTAAGTCGTTAGGGAATATTTATAGAT  
GTGATCGGTTATACAGCTGGCAGAAACTTTTCTCTTTTATCTTCTTTTATTATCCCTTCTCACATCACCC  
TTCTATATGAGTCTAATAGCCTCTATCTTACTAGTCTCAGAGTTAAAGGCCACCTCTACTCCCAGTC  
ATCTCTGTAATGGATAGTAGTCTCGGTATAGAAGAAAATCAAGAAAATTCCTTGGAGGATTACAATCCTAA  
AATGGGTGCAAACTGAGCAAATCCGGTACCCCTTTTTCGTGACAAAATCTCACTACGGATAGAAAAA  
AGTAGATCTTGGTCAAAATCCATTCAAAAAGCCACAGTAGATATTCATATGGAATATCTGTAAAACAACC  
ACCCTTTATACTTCCCTAACGGCATGTTTCTATTTTAAATAGGCTTAGACAAAATGTGTGTACCTGCGA  
CAGCGTACGGAACCGCTTAGTTAAGTGCAAAAATACCTTAACATTCATTTCCACATCTTTCTATAGCTCGA  
TGAATTCCTTGATGAGGAACATTGAAATGTCCTGCTAAAAGCTTCTAAAAGAAATTTTCGGACTATCTCCAT  
ACTCTTTAGCTAGACGCAAAGTATCTATCACATAATGATGCTTAGGAAGCAGAGTTTCCCATAACGTTTC  
GCTTTCCTGGGAAAAGACTTGTAGATCAAATCCCTACATGGTGCCGACGATATGATCTCTTTCCTTAAAG  
AAAACCTTAATTCAGAGAACACCTCACCAAACCAAAAGCTTATCCCTTAACATGGCATCAGAAAATCTTAT  
GAATCTCAAAAGATTCGTCTGAAACAGCTCGCTCCGGATGAATAAGAAACTCTACTGAATCAATAATTTTC  
ATCAAATGTAAACCGGATGTCAGCAAATTCGAATCACGCGATCCCTTTTATACATCCAAATCCCGTTGTTTCA  
CAATCTAAAACAAACGAACTCAACATCCCTTCAATAGTACCACGCGCTAATCGTTCTCCAATAAAAAGCTCA  
AATCACAAACCGTCTGTGACTCTATACTTACTTCTCAAAATGCATCCGTAAGCGAGCGCATCTGCACACA  
AACACTCAAAACGGAATGTTGGAAGCAAATTCACGGCTTCTGGCCATTCGACACAAATAAGATCTTCTTCC  
TCTGCGTCTTGAAAAGATCTGCTCCGTTCCATAATATCCATCGTCTCAAGACGATACAAATCATAATGGC  
AAACTCTGCGCCACCTGCTTCAATAACATGAAGCAAAGCGAAAAGAGGGGCTAGCCACCTGATCGACAGC  
TGCTCCCTTAAAACCCCTTGAACGATCCCTCTAACAACTCTGTCCTTCTGAGCCGTAGTCCCTGAT  
AATAAAAACAACCATAACCAGGAGTTAGGTCCCAGCAAACCCCTAGTAGCTAGGTCTATAGTCTCTTACACG  
AGTGAGTTACTCTTCTGTATCTACCCATTGGCTAATGACTTATGAAACGCTGTGTCATCCGCAAGGCTT  
TCGACAACTCAGCGATCTTTCTCTCTAAAAGCATCAAAATAAGAGTCAAAAATGAGCTTCTAATT  
GGAACTTATTCGTATCAAAACTTCTTCGAGAGTCATAGGACGTAAGTAAGAAGTTTAAAATCCCTCCAA  
GAGAGTTGGTAAAATGTTGGAACAACCTCCCTGTTACTGCAGAAGCATAGACAGTCTTAATGATTTGGTTCC  
CAAAAGCGGAACAATATAGGCTCTGATCACTTCAAGGATCATCGGATACATAAAAACGCAAAACAGCTACAC  
CACTCTGACGCTCTCTATTCGTAGGGCAAGAAAGAAAGCCAGTCAATAAATAGCATCCCTGAGGGCAAAAGTA  
GACGTTATCAGCAAAAACCTTCCCAGTAAACGGACAAATGTAAAATACGCAAAATCTGCTCATTCACCTCT

GGCTTACCAGAA GAAACAAAAATCTCTG TTTC TCTCCAGATCTTCTTGTCCGCCTCTAACAAC TGAATCG  
CATCTTCTGTGCT TTTAAAAATGAT TTTATCC CGAACAAAAACAACCGG ACTC AAGCGCAAAGACTGCTC  
TAAATAAA ACAAGTACGTTGCTAACAA TTTCTGG GGAT CAAA CTT TTTCAAAAAC TGGAGAAGTT CAAAC  
AAAATACTTCCA GAAATATTCATACTT ATCC TTACTTT TTTCA GTTGCTTAATGGCAAAC TGAATC TTCT  
TTTAATCACCAGCCTCCTTC TAAA GGAAGCC TTTC CGCCCAT ATCC CTGTTCTCTACCT ACTC TCACTT  
CCTTGCAAAGTAT TTTACAAAAAGCAAACAGGCCTAACCTCCCATGCTCTAG GGGTAGGGCATCC  
TGAATCGACTACATGCTATCATGAT TTTC CGTTAGGCACAAGCTCATTACGTT TTTC AATAAGAC CAAAA  
ATTC AAT GAAA AACTTCTATGTCGAGCAAGAAA ATCA TTTC TC TAAA GCCCTTCGTACTAAGGGCTCAA  
AAAT CAAATTTCTATATAGCCTTGTC TTTAGG CAAATAAA GAGAACTTAGGAGATGTT TTTA TAGCCA  
CCAAAAGAAC ATTC TGTGAGCTTAACCT TTTA T TAAA ACAGC TTTC TCTCTATACTGGCCTCTCATGCA  
GCTATGGCGAACC GG TAGACGCGCTAG ATTC AGGTTCTAGTGAGCT CAAA CT CATGGAAGTTCAAGTCT  
TCTTAGCTGCAAAC TTTT AACAAACGCCCGGACAAGGGCATCTGTCTTGACTT TTTC GTAGAGGT  
TATGGCTAACTGGCC TTTCAGAAT ACGGCTAGCCCCG CAAA CTTGCGGTTCTTAGGGAAGCCCT GAAA CC  
TCCTAGCAA GGG TTTA CATAGAT TTTAAA TTAGGAACAAGT TTTA TGGTCCAAGTTGTATCTCAA GAAAA  
CTTCGCTGATAGCATTGCTTCAGGACTAGTCC TATCGATTTT CAAA CTGAATGGTGTGGCCCTTG TAAA  
ATGCTG ACCC CAGT ACTC GAAGC CAAA GCAGCAGAAC TTCTCACGTC ACTATCC TAAA AGTGGATATTG  
ATTC TTCCCCTAGACCTGCAGAGCAATACAGT TTTC CTCTATCC CAACGCTGATCC TCTTTAAA GATGG  
AAAAGAAGTGGAGCGCAGCGTTGG ACTC AAAGACAAAG ATTC CAAA ATCAAGCTCA TTTC CAAGCATCAG  
TAGATGCTCTCTCTCTA GAAA AGGCCGAGAAA TTC TCGGCCTTAACATGATTC AAAATAATGT CAAA TA  
GT CAAA CCGAGCGACTTCATACATACT ATCC TACTGAAGTAG TAAATTC AGGGATCGAGTCCCTTCA  
ATCATAG GAAT GTA TAAA CACTGAGAC GAATAAGC ATCCAAGACGGTCTGCGACAATCCT CAAAATTC TG  
CGCCAAAGATATAGTCCCATC TAAA GGCAACTC TCTCTCCCCATAATAGGAGGAACCT CAAA TAGTTAG  
ACAAAAAATGCGCTC TTTAGGC ACCC TAAAAGAGCTTCTTC TAAA GAATCTACCAC GGATAAAGAAAGC  
CGTTCCCAATA ATCCATTC CGGCTCTCTTCAAAA TTTATCTGC TAAAGAAA AACCTAAGGGCCGAACTA  
ATATAAGTT CAGCCCC TAAAGCCACACATGTCTACCAAT ATTC CCTGT ATTC TGAG GGATATCT GGATT  
GTGAAGAACGATGCGCA TAAAAAATCC TAACGACT ATTC TGTAAACAGATACATTATCGTCG CAAA CTTCA  
ATTAAC TCACTTCAAAAAT GAGT AGAGAG CAAA GAGGTAATTGTCCAGCTGTTCCGTAAGCT TAAA TCTG  
GATGTATG TAAA GAATC GAACCTCTCCTTC TTTC ATCCCTTG CATACCTTGG GAAA ATCCAG GAAT TAC  
CAAA GTCAAAGGCAG TAAA ATGGGCTC TTTATTC TTCTCTGAAGAAT CAAAACCTTCCCATCGATGAAG  
CTCCCTGTATAGTGAAGCAAAGCTGTAGGCTTCCCAGAAA GAACCCGTCCTGT ACCC TCTTTCAACAC  
GGTACTGTAAC TATTAGGCTCTA ACTCAATAACCC CAGCCTTCTC TTTAT TTTC TTTAAGAATTC TTC  
TGCAGAAGC TAAA TTTC CGAGCAT CAAA CTTC GAAA CTAGCTT CAAA TACTTCTGCCACAAA TT TTTC A  
TATTC TGTATCTGT TAAA GGAGC ACTGTGCCATCTA TTTC AGATTGC ATCC TTTA ATCACTTCAACAA  
GATCTAAC GAAA AATCTTCCGTTCCGCTCAACTGACGAGCCAA TAAA TGCCAAAAGTCTTGATAACTC  
AAA ATTGTCTGTCAATGCA GAGT CTCTACCATGCT TTTC TCCGTAGCCGATG CAAA CGAACC GCCTCCG  
TTATCAC ATCC TACGATAGGCAGAGCGACTGCAAACATAAGC ATCC AACTTAATAT ATTC TTC ATTC GTT  
TC TTCTCAGTTGCACCTGAT TTTC TCAGATGTGCTTT CAAAAA ACCG TTTC CTAGGT GAAA GACATCC  
ACCC TTATCACATGCTG TAAAAA AAGCCGT TTTC CCGACCTCTAGAGCAAAAACGATATTATAG TT  
TCAACCC CAGTTCT TTTAATT GAAT CGGCAAAA TTTC TGAAGGTGCCGACATCATCAATCTCCTGC TTT  
CTGTGT TTTAGGGAACGCAATCACTTCTC GAATAG TTTC CGCTCCTGTTAGAACCATCATAATACGATCT  
AATCC CAGAGCAATCC TAAA TGTGGAG GAGT CCCAAA ACTC AACGCATCAA TAAA AAACCC GAAC TCT  
CT TTTA CAC TTTC TTGCGACAGC TTTAATAAA GCAAATAT TTTA T CAAA CAAATCT GGATTATGTATACG  
CTGAGAACCAGAAGCAA TTTCATAACCA TTTAACACCAAATCATAGCTCGATGAACGAACAGCAAAAAGGA  
TCT GAGT C TAAA AGCGAGATATCC TCGTCTAATGGAGCTGT GAAA GGATGATGCTCTGGACATAACTCGC  
CTTCTCT TTTAGCAAAAAGCGGGAAGTCCGTG ATCC ATACAAAAT TATATTGCGTT GAATCA TAAA GTTG  
ACGCTC TTTCGCAATCAACCTACGCAAATGATCTAATGCCTGGTTAGCAACAGCCTCTGGAGCTGCTATT  
AACAA TAAA ATATCTTGGTCT CAAA CCTCAAAGCTTCAAACA TTTC TTGGAATACGTCTTCCGAAGCGA  
ACAAA GCAACATTAGACGATAC ACCC CCGTCTTGT TTTAATCC ATACTAACCC CATAGATCC ATAGCG  
CTTAAC GAAATCTGTATAGATATCTA ACTGC TTTC TAGACATATCTGCTCCGCCCGAACACAAAATCCT  
TTA ACTGTCCCACCGTGAGCTAATGATCTAAGAAA ATCGAAGTGT GAACAAA CGTGCATATTC ACAAC  
AATT CAAA AGGCGCAAGCC GAAA CG TAAA TCTGG CAAA TCCGTTCCATAGGAGTC TTTAGCTTCTTGATA  
CGTC ATTC TCAG GAAA GGTGCC TTTAATTC AATCC TTTC ACAGCAA TAAA CGTGTAAACAAGCTCTTCT  
ACC ACTG GAAA GAG ATCC TCTGGCCCAACAAAGCTCA TTTC CATATCGATCTGTG TAAACTC AGGTTGAC

GGTCCGCACGCAAATCTTCATCACG GAAA CAGGTCGCTA CAAAGAAA TACCG ATCC AAACCTCCAACCAT  
CAAAA CAAATTTAAA CAACTGTGGAGACTGTGGAAGAGCA TAAA AATTCCTGGATAGATACGGGAAGGG  
ACTAAGTAGTCTCTTGCTCCTTCCG GAGTAGATTTTC CTAAGATAGGCGTAACTACCTCTG TAAA ACCTT  
GTTC ATCC AAATACTGTCTGCAAGCTAACATAAC TTTA TGTCGGCACATTAATCTGTCCAAAATATCGCC  
ACGGCGCATATC TAAA TAGCGATAAGTTAACCGCAGTTCTTCG TTTA CATTAATGTGTTTCATCA GAAA TG  
GAAA AAGGAAGATTC TGTGCCCGAGACAACACTTCCAAGGAA GAAA CCTCTACCTCAATAGAACCTGTAA  
CCAAATTCGGGT TCTCC ATCC CCTCTAACCGAGCACAAACAAGTCC TCCACACAAAGC ACCCACTC TGA  
ACGGACTTG ATCC ATAAGCTGATGAAGTTCT GGGT TTTCTCTTGCCGACACACTATCT GAGTAATCC CA  
AAGCGATCTCGCAAATCAAT GAAA ACA ACTC CCCCATGGTTACGGTAACGATGC ACCCACCC AGACAAC  
GAACATGTTCCCCACATGATCAAGGGACA ACTC ATTACA TTTA TGC GTTCTGTACTTCA TAAA CCAACC  
CAAA TTCTACATCTTGTGAGCCCCGAGAAAGC CAAA ATGCAAAGACATATC TTTA ACTATAAAA TTG TTT  
CGTTGCTAATTC TTGTTGCTAAGAGACAAA CAAA ACTGACTTGTGATCGGCAGCATCT TTAAGAGAC  
AATTTA GGCTTCTTATGGCTCCAATCTACTTCTGTTGCAATGCC TAGGTTACG TAAA CGA CAAA CCCATG  
AAAA CAAAATGCATCTGCCTGCTC ATCC ATAG GAAT TAATCGCAACCGTCGCGTAGAGGTGCGA TAAA GA  
GTTTC CTTGCTCTAATAGCG CAAA GATT ACTCT TTTCAATCC ACTC CAAA ACCAAAAGCTGGCATAGAA  
GGCCTCCAGACTGCGCAACCAATTC ATCATAACGCCCGCCGCTCCCAATGCATAGGAGCGCTCTCCCA  
CAACAGTCACCGCTTCAAATACAAG ATCCGTATAATA ATCCA ACCC TCGAACTAGCCTT GGAT TGATTGC  
AAAAG GAATCC TAAA GCC TTTA ATGGGCTAATACTGCATCAAAA TAGCT TAAA TCCGATCATCTATG  
TAATCC AAAATTGAGGGAGCTT TTTCAAT GAATTC CTGGTCTTCTGGCTCCTTAGAAT CTAATATACGCA  
ATAAGTTCGCATGATATC TTTCTTGACTCAGAGGCGATAACCGGTCTAG ATCC TTACGGAAGA ACTCCCG  
CAAAGTTCGCATAACGAGCCC GAGTCT CAAA CCTCC TAAA AAATTCACAT GGA CAAA CATATGCTGA  
AGCCCGACCGCTGCA TAAA AATCC CATAACAGAGAGACCTCCGCATCTCGTAAGGGGT GCCGCACAC  
CGATAGCTTCTAGACCGAACTGATGATGCTGACGGTAACGTCCAGATTGTTGCCGCTCGTAAC GAAA CAT  
GGC AAAATATAA TAAA ACTTATTATC CAAA CGCATATCAGCA GAAT GATCC AACAATGCACGAACA  
GCTGCAGTCCCTTCTGACGCAAAGTCAAAGAACGTCC TTTT TTTA TCTAAGAAGTA TAAA CTTCTTTT  
TTA CAATATCACTGTGTTCTCCGACGCG TAAA AAAGTCTCTGTCT TTTCAAAA ACTG GAGTTCGGATCTC  
ATCAA ATCC ATATAAAA TTACAAATACGATGGGCTGCATGCTCAACACG TTTCCATAGAGAAGAA TTTCTC  
CAAAGATTT CAAA GGCTTGTACATAGG GAAA AATATCAAAAACGCCT CAAAGCAATGCATTACTCATTG  
TGTATAACCGGACT ATTC TCAC GAAA AATGTTTC GTGATCTCACCTT TTTAAA GTTCTTTT CAAA CGCAA  
AGAACGAGACCACTATGTTACACCAAAA GAGT TTTCCAGGACTACTC GAAAACCTGCTCCTTTTCTCTA  
TTA TTTCT TTTACAAA ACACACCTT ACTCTCCGCTT ATCCATCC ACAATATGCCGC ATCCTC ACCCTAC  
TCCTCTC TTTA CACAGCAAATGTATTGTCTTC TAAA AGCTATTAAGC TAAAT GAAA GAAGTGTGACGA  
CATTACTACAATTGTCCAATATGATGCCGGGCTGGTCTAGCCTAGACTGATAGCAAAAAACGAGGTCTT  
AGAAGCTGATAC TTTCTGTCTCAGTATGCA CAAA TATT TTTCTTAAGCTTCTAGAGCAAACACACTT GAAT  
CGAGCTAACACCTAT GAAT CTATGGACCAAATTT TTTCCAGCCTCCTTGCCACAT TAAAGAAA TCAGTGGC  
CCG GAGT TGGT TAAA AAGCAGTACAAGTACTGGA GAGT GCGTATCTTCTACAGCATGTTCTTA GGGTACG  
TGTTCTTCTAC TTTA CAAG GAAA AGC TTTACT CAAA CCATGCCAACCTTGATCGCTGATCTC GGG CAAA  
TAAA GCTCAGCTAG GGAT TATCGGTAGT ACTCTCTATATCACTTACGGCATTAG TAAACAAA TAAGCGGT  
GTCATGCTGACCAGTCCA ATCC TCGCTA TTTCA TGGCTATT GGAT TGATTATTACTGGTATCTCTAACA  
TCTTC CAAA GTCTCTCTTCTACA ATCC CTCTG CAAA TATTGTTCTGGG GAAT TAACGGTTGGTCCAAGG  
ATGG GGGTGGCCTCCATGCGCACGATTGTTAACTC ACTGGTATTC CAAATCAGAGAGAGGAACCTGGTGG  
AGCG CAAA GAGCACTTCTCATAATATAGGGGGAGCGTTG ATCC CTGTTCTTACCG GAGTTGCTATTGACT  
ACACG GGGTGGCGCGCGTTATG TTTATCC CAG GGAT TACAAA TATTATCATG GGATTTA TCTTAATCGA  
TCG CAAA CGAGAC ACTC CGCAATC ACTC GGGCTCCCCGCTATA GAAA AA TTAGAAA AGAAGAGGATGCG  
ATCC ACATGAA GAAA CAACTGCAGATATCTTAGAGGAAGAGGCA GAAA GAGAGCTCTCTACAAA GAAA  
TCTTG TTTACTTACGTACTATCTAA TAAATGGCTATGG TTTCTGTCT CAAA CCTCCTTC TTTATTTA TGT  
GGTTCGCATGGCAG TAAATGATTGGAGCGCTCTCTATCTAATC GAAA CAAAAGATT ATTCACAG TAAA  
GCAAATCTCTGCGTATC CAAACAAAAA TTGGC GGAT TACAAA GTATGCTATTAGCGGGCTGGCT ATCCG  
ACACGA TTTCCAAA GAAA ACGTGGACCAATGAACGTAGTCTTCTCGTAGGAT TATTAG TTTCCATCTT  
GGGAT TATGGGGTACTC GTGATTACTTCG CAAA GT GGATAGATGGAAC ATTCCTA TTTATCATTTGTTTT  
TTCTT CAAA GACCACAAATGATGATT GGAT TGGCAGCTGCAGAAT TGTCTCA TAAA AAAGCAGCTGGAA  
CGGCTAGCGGC TTTA CAGGATGGTTCGCTACTTCGGAGCAGC TTTCCGCC GGATATCC TTTA GGGAAAGGT  
GGCTCA GGAT TGGGGCTGGCAC GGATTC CAAA TTGCGCTCTTAGCTTGTGC CAAA ATTGCGCTGATCCTT

TTC TTGCCAACATG GAATGCATCC GAACAGAG CAAA A GAAA ACATAGTCACTAAGTGAAGAGCTGT CAAA  
ACCT GGATTC CATTACATTGCC ACTC TCAGTATTC CATCTT GGAT GCAACATGCTCAATCAAGAAG CAAA  
TTGCCAAAGCAGTG GAATATCAAATTC CCGCGCTCGCTCTTACCGATCACGG GAA CAAACAAA GCGCGGT  
C GAAT TTTA TAAAGACCTG TAAA CAAAACGCGAT TAAA CCTATCATC GGGTGTGAGCTATACGTGCG ACCC  
TCTTCTCG TTTT GA TAAA AAAAAAGAAC GAAA AAGCC GAGT TGCCAACCATCTC ATCC TTC CAAATAAAG  
ATGAAGAA GGGT ATCGCAACC CAAACAAA CTCTCCTCTCTTGCTTACACAGAAGGTT TTTA CTATGTGCC  
TCGCATAGATAGAGATCT CAAA AGCCAAC ACTC CAAAGGACTTATCTGCTTATCAGCCTGTTTA TCCGGA  
TCCGTTGCTCAAGCTGCATTG GAAT CTGAAGAAGA TTTAGAAA AAGATCTTTTA TGGTATCAAGATCTGT  
TTT CAGAAGACTT TTT CAGTGAAGTACA ACTC CACAAATCC TCAGAA GAAA AAGTTGCTCTA CAAA AAGA  
AGCTTGGT TAAA ACAAACACTACTATCA ATTC ATTGA GAAA CAACTC AAAGTAAA TGAAGCTGT TTTA GCT  
ACTTC TAAA CGCCTTGGT ATTC CTTCAGTTGCTACAAATGATATTC ACTA CAAA AATCC GGACGATTGGC  
TCGCTCATGAAGT TTTA CTCAATGTT CAGTCTAGAGAGCCTATTC GGACAGC TAAA CAAA AACTTAC AT  
TCCCAATCC TAAA CGCAAACCT ATCC TAGTAGG GAAT TTTA TTTAAA TCC CCTCAAGAGATGGCAGAG  
CTA CAAA CAGCAC ATCC AGAGACTATTACCAATACGTGTATCGTTGCCGAGCGCTGCCACCTAGAGCTTG  
AT CAAAAA CCAAACACT ATCC TATCTACGTCCCAGAAGC TTTA CAAAAAAA GGATCC TACACAGAAGA  
GGAGCGTACAAAGC ATCC TCAGCCTTCTTAGAAGAAC CAAA CGAGCAAGGAT TAACCAGCAAATACACA  
CCC GAGCTTCTAGGACACATTGCAA GAAATTC CCTGGGGAAG ACCC TCTTACGCTGGT TAAA GAACGTC  
TCAAATTG GAATCC TCTATTATTATCTCCAAAG GGAT GTGCGATTACTTGTCTATTTGCTGGATATTAT  
TAACTGGGCAAAAGATCATGGGATTC CTGTTGGCCCCGGTCGAGGCTCTGGAGCGGGCTCTGTCTATGCT T  
TTT CTTCTGGGGAT TACT GAAA TAGAACC GATTC GCTTCGACCT TTTT TTCGAACG TTTT CATCA ACCCGG  
AAC GGAT ATCGT ATCC CGATATCGATATCGATATCTGTATGATTGGCAGAGAGCGGTTATTA ACTATGC  
TATAGAACGTCATGG TAAA GATAATGTAGCCAAAT TATTACA CAAA GCACCAT GAAA GCCAAAATGGCT  
ATTAAGGATGTGGGTAGAAC TTTA GAT ACCC CTTAGC TAAA GTGAAC TTCATCGC GAAACAT ATTC CTG  
ATCTTAATGCTACCATTACTTCGGCATTAGAGGCTG ATCCAGAAT TAAAGCAACTATATGTAGATGACGC  
TGAAGCTGCAGAAGTTATTGATATGGC TAAAAAACTAGAGGGATCTATCCGCAATACTGGAGTGCATGCT  
GCGG GAGT GATTATCTGTGGAG ATCC TCTCACTAACCAT ATCC CGA CAAATGTCCC TAAAGACTCATCCA  
TGAT TTTT TACTCAGT ACTCAATGAAGCCAGTA GAAA GCGTTGGCATGCT TAAA GTGGATTT CAAA GGCTC  
AAA AACCC TAACCGGC ATTC ACATCGCCACACAGGCGATCTATAAAA AAAACAGGC ATTC TACTC GGGCT  
GCCAGATTCCTCTAGATGACCAGAATAC TTTT TCTCTTCTCATCAAGG TAAA ACCATGGGGATCTTCC  
AAATG GAATCTCGTGGCATGCAAGACCTTGC TAAA AACTTACGCCCAGATGCG CAAA AAGAAA TTATAGC  
GATCGGAGCCCTCTATCGCCCTGGCCCTATGGATATGATCC CATCA TTTATCAATAGGAAGCATGG TAAA  
GAGAATATT GAATACGACC ATCC TCTCATGGAACCT ATTC TAAA A GAAACT CAAA GAAT TATGG TTTACC  
AAGAACAAGTCATGCAGATTGCCGTTTATTAGCAAAT ACTC CAAA GGAGAAGGGATGT TTTA CGCCG  
CGCTATGGG GAAA AAAGACCATGAACAGATGGTCAAGGAACGAGA GAAAT CAAA TTC AAGAGCCGAGCG  
AATGGCATCGACCC TTCCATAGCAACGACTATCTTCGATAAGATG GAAAAG CAAA CTTCCTATGGATTTA  
ATAAGTCCCATGCCGAGCTTACGGTCTTATAACCTACACAACAGCATATCTTAAA GCCAACTACCCCAA  
AGAATGGCTTGCCGCCCTTCTCACTTGGCATTATGACGATATTGA GAAAGTCGGGAAGCTAATTC AAGAA  
GCTCACAGCATGAAC ATTC TCGTCTGCCTCCTGATATTAAT GAGT CTGGACAAGAT CAAA AAGCC ACTC  
AGGAAG GGATTC GCT TTTT CTAGGAGCTGTCAAAGGCGTTG GAAT GAGCATTGT GGATAGTATTGTTGA  
AGAGAGA GAAAAAAACGGCCCTA TAAA AGTCTGCAGGATTTT GTTCAACGCGCAGAT TTTAAA AAAGTC  
ACTAA GAAACAGCTT GAAA A CAAA GTGGATGCAGGAACC CAAA ACTGCTTCGAACCTAATAA GATCTTG  
CGCTGGCT ATCC TTAATGACC TTTA CGACACGTTCTCTAGAGAAA AAAAAAGAAGCTGCTACAG GAGT CCT  
AACCTTTT TTTT ACTAGATAGCATGGCTAGAG ATCC TGT TAAA ATTACTGTCTCTCCT GAAA ATGTTATC  
CAACGCTCTCCTAAG GAGT TGGT GAAA AGAGAAA AAGAAT TACTTG GAGTATA CAAA ACTGCCCATCCTA  
TGGATGCTGTTGAACACATGCTCCC TTTT TTATCTGTAGTCCCAGCTCGAGAT CAAA AAGGACTC CCTCA  
TGGAACATTATTC GTACAGTC TTTT TAATCGA TAAA GTCACTAC TAAA ATTTT CTCTGCAGAGCA GAAA  
AAA CAAA CACT TTTA CAAGTCAGCGATGAAGTCG ATTC CATATGAAC TTC AATCTGGGCCGATATGTACG  
CCGAAT ACCATGATCTATTGGAAGAAGATCGTCTTA TTTA TGCCAT CAAA GCTATAGATCGACGTAGTGA  
TTT CTTGCGTCTATCTTGTGGT GGAT GCGAGACTTATCTACCGTTAATGATTC AGTAATTGCG GAAT GC  
GACGAAGTCTATGATCGACT GAAA AGTCA GAAA GTAT ACTC TTC AAC GAAA AAATCAACCGGAGCCCAGT  
CCTCAGCAATGA TAAAGAAAGTA GAAA CTAGAGAGATCTCTCCCGTAACCATCTC TTTAGA TTTAAATAA  
ATTACGCCATAGCCACTTA TTTA TTC TCAAAGGGCTGATACGCAAAT ATTC TGGATCTCAAGCACTC TCT  
CTTGT ATTC AAAAAAGATAATCAGCGGTTGCGCTCTATCTCTCCAGATGCAGATTT TTTT GTAACAGATG

ATATCTCTTCTCTTCTTCAAGAAA TTGAAGCAACCAAT ATCC CTGCTCGGTTCTAGCCACTACAGTATA  
ACTA TTTAAAAGTGAGATGCTCCCCTC CAAA GTAAGATCTCTACATAAGTCTCTTGCC TTTA CCGCAC CA  
AA TCGTGGCGATCC AGACAATGGTCTCC TAAATCC TAT ACCCGAC TAAAAAAT CAAA AGGCTCTCTAGCA  
AACGAAGGCGGAGCT ACTC CACCTTCA TTTCAAGAGAGATCTAT GAAAAAAGCTATGCGCGGAAG GAAAA  
AGAAA AAAAGAGGTCTGTGCTA CAAA CAGTATGTAGGAGC GAAA TC GAAAGG TTTCCCTGTAATAGCATT  
AATATACTCAACACGAACACTACT ATCC GAAGCTGCAATAGAAA CCTTATATACCGGAACGT GAAT CTGT  
TCAGA ACTCAAAA TAAAGAAA TTATCGCCAAAAATCA TTTCCACAAGAT CAAAAATACGATCC TCTGGAT  
ATACCACGGAACATACCGTAG ATCC TTTCCGGT CAAA CTAACCAAACAGGAGAT GAAT TGAATACAGTCAT  
GC ATCC CTTAATTGGCTGAGGCTGCTG GAAATGACTG TAAATCAAATTATCAT GAG TAAATATTA TTTCC  
TTCTTCTGACATGCAC GAAT CACACGATCGGCACGAACATTACGCATAGACAATGCTTGT GAAA GAACCTT  
CTCTCGATGCAG ATCC TCCCATAACCAGC TAAA ACCTGCATAAGCTGCACATCTTG TTTCCCTGCT TTTAA  
CATGAGGC ATTC TC TAAATCC TTTA GAGTATGTCCAAG ATCC AGT ATTC AACACCATCTCTCCATTAGAC  
AA ACTC CAAAGCATAGCTCCTTCGTGACTTCCAGCAGC TTTA TCTTCTTCCCC GAAA AACGTACACGCA  
TAAGGACATGAGGAACAATAACA ATTC TGCAGACGC CAAATC CAAA GCAAACATGGCTAAGACCTGTTC  
TTCCGATACACGTC TTTCAAATACGCATAAGCGCTCATTACCT GAAA TCTTACGAACTAATTGAGAACCTT  
T TTTCAAC GAGT TCGATTCCGTAATCC ATAGCAAATG CAAAATTC TATGTGAAT AAGGGATCTTATCCC  
AAAACACAATAGAAC TAAAAATAGCCGCAATAAAA ACAACT TTTCTCATAACCC AACCTT TTTATTTATT  
TTA TAAATAAAA AACAGCGATGCCAAA TAAATTTT CAAATTC CAAAC TAAACAAAAGCTATAAGAGACAAA  
ACAAATTC TCTT TTTCTTT TTTATGATGACGC CAAA TTATTATTGTCCCTGCGTCTAGCTAT GAAA GTCA  
TTTTAAGAGCGC CAAA CTTGTTTC TTGTGTTGCCCTGCGGAT GTTATGCGCGAGT GCCCTCT CAAA ACC  
TTTC CGAGGCGCTATCGCCCCAAACCGGTAC ATTC TAAACATTC CCCAGAACTC TA TTTTC GAGATGGGA  
GATAAA TAC TTTTCAGC TAAAAAA TTTAAGCAAGCTCTTC CAAAT CAAAGAAT GATAACACATCA TTTTC  
CAGAACATGCTCTTC ATCC TAAAGCACAG TTTTC TTGTAGGGCTCTGCTATCTT GAAA TGGGCC ATCC TGA  
CTTAGC GGATAAA GCGTA ACTC AATATCAAGAGCTCGCCGATACA GAATATTC TGAACAATTATTCGCC  
ATTAAGT ATTC TATCGCACAAG TTTTC GCTAACG GAAAGCG TAAA AATATCGTTCC CAAAGAAGGG TTTTC  
CTAAGTTGTT GAAA GCAGATACAGATGCTCTGCGTATT CAAAAGAAA TTGTGACAGCATCTTCCGACGC  
AGACCTCAAAGCTTCTGCTCTCTACGAAAAGGTGCTCT CAAATTCGACC GAAA GAATATTC GGAAGCG  
ATCAAAA ACTC TAAA AAAAG TTTCTCTCAG TTTCTCTCACACTC TC TTTCTCCAGAGTCTTTTACCCTTA  
TTGCAAAA ATCC ATTGCTTACAAGC CAAA CAAGAGCCCTATAATGAACAGTATCTTCAAGATGCTCGGAT  
GAAT GCAGCAGC TTTACG TAAA CAAC ACCCTAATC ATCC TAGCAATACAGAAGTAGAGA ACTATATTCAT  
CACATGTGCGAAGCTTACGCTTCTTGCTTAT ATTC AACCGGACGCT TTTATGAGAAA AAGC GAAA AGCCT  
CTTCTGCAAAA TTTA TT ACTC AATAGCTCTAGAAA ACTTCCCTGATACCTCCTATGTGCG TAAA TGCAA  
TAAA CGATTAGAACGGCTCTC TAAA CAAAT GAGT TAAGCGAACCAAAGG GAAA CTTCTTGCATGCT GAAA  
ATGT CAAA GTT GAAT AGCCTCGT TTTCTTCTCGTTACTACTATCAGCCTGCGGCTATACAGTGCTCTCCC  
CCC ACTATGTA GAAA GAAATTC TCGC TTTCCGAAGGCATCTATGTCTGCCCTATCGAAGGAG ATTC ATT  
AGGAGATCTCGT ATCC TCTC TTTCTTAC GAATTA GAAA AGCGAGG ACTCCACACACGATCTCAAGGAACC  
TCTTCTGGTTATGT ACTCAAAGTCTCTCT TTTCAATGAGACTGAT GAAA ATATT GGATTC GCATAC ACTC  
CCCAAAAACCTGAT GAAA AACCTG TAAA ACACCTCATTTGTCTCTAATGAAGGGCGCTTAGCGTTATCAGC  
AAAAGTCCAAC TAATCAAAAACCGCACACAA GAAA TATTAGTGGAGAAA TGTCTGA GAAA ATCGGTTACT  
CAAA AT TTTCAACCTGACCTCGGAACCGC GAAT GCTCATCAGCTAGCTCTCGGACAA CAAAAA TGCATA  
ATGAAGCAATAAA AAGCGTTCTCGTATATTGT ATTC GCAATTAGCAGAGACTATTGTACAACAGGTATA  
CTATGACCT TTTCTGAAGGAGAGCAAGT TTTCCAGCAACATTACAAGATC TTTATCC TATGCTCGAT CA  
AATCAAACGAGCAGGCGTCCACTGTAACGTACTCAGAAA AACTATCGAAGCTAGAGCTTGCTTGTA  
GAACTTCTCT TAAA TATTATC ACCCATGCCTATAAA GGGCTTCTTCCACA GGATGGATCCGT ATTC CAA  
ACACA GAAACTC CAGATGCTCT TTTAGTTCCGGAT CACAGATCATGGCCAGCC TTTAATCC CATAACCGC  
TTCGCCAGACATCATGCGCCT GGAT CTACCTATTGAGCAAAGAA GAAT TGGTGGACTAGGGATA TTTCTA  
GCAAAA ATCTCGGT GGAT GTT CAAA ATTATGAGAGAGT TAACGACACAAATGTTGTC ACTCTCACTC TAT  
ACACAAAACCTCACA ACTCATAGTCTAATCT ATCC ATCTATTGAAGGCGGGCGTAATGCCCGTAATTC TT  
TTTC TGT ATCC TGGAT ATCACACAAATATCTTTCGCAACGCCTCTAAGAT TAAA CTGCAAT TATTATAC TT  
TC CTGATGCTTCAAAAAGCTAATTC AGGAGAGAACTC TTC ACCC TGG TTTAAA GCGATGTAGCCGCGAGTA  
ATTGCC TCAAC TAATGTAGGTACCAACCACAGCAAAA CAAATGT TAAATAAAGT GAG TTTAT  
CTGAAG ATTC TGATACGATGAAGTCATTAACAGCACTGTCAGCAAGTTCCCTCAGCCT TAAAATC TAAA GC  
CGAACGAGCTAAGACATCAGATAT ATCCA GAAA GCCTTCTG GAAA AGCTGTGTTGTGATTGGTAATTGAG

CGACG GAAAAAATCC TC TAAAAAATC TAAACTC ACTGCCGTTTC TCC TTTCTCAA GGGTAA CAAA TTATT  
GAAGGCACCGTCAAGAGCTTT CAAA ATATTCATAAGTC GAAATTC TTAGAAA GCAGACCATCAGCAGGTT  
CCATGCGTACTTTT TTTCTTGTTGTGTCGGTTC TTTA TCTGCTTGGCTCCCTTT TTTCTCTCG TTTCC CAA  
ATACGCAG ATCC CCATACTGTTCTTACAAAAG GAAT CGCAGCCGCAGTCGTTTCATGCAG ATTC CGGAGCA  
ATTC T GAAAGAAA AAAATCTGGAT CACAAGATT TTTCTGCAAGCATGACCAAGATTGCAACCGC TTTAC  
TCAT TTTAAGGCAGT ATCC TGATGTGTTA ACTCG TTTCATCACT ACTC GCAGAGAGCCACTGACTTCTAT  
CACTC CTCAGGC TAAA CAACAATCCGGAT ACCGAAGCCCTCCCATTGGCTAGAAA CTGATGGTATGACT  
ATTC AAC TAAA AGTGAAGGAAGAGGTGTCTGGAT GGGACCTT TTTACGCTCTACTTATTAGCTCTGCAA  
ATGATGCTGCCAATGT TTTAGCAGATGCCTGCTGCCAAGCGTCTCTGC TTTCATGCGCCAACTTAAT GA  
GTT CAAA AGGGA ACTC GGTTGCCAAAAT ACTCAT TTTAATTC TCCTCATGGACTC CATCATCC TGATCAC  
TACACGACGGCTAGAGATCTATC ACTCATCAT GAAA GAAGC TTTAAA AGAGCCTCT TTTCCGCCAAGTCA  
TTACACAGCGTCTTATACCATGGAGGCCACCAACTTAAGTCCA GAAA GAGT TCTGTCTTCCACGAACAA  
ACTTC TTTCTTCTCTTTCGACTTACT TTTATCC ACCTTG TTTA GGAGG GAAA ACAGGAACACAAAAAGT  
GCAGG GAAA AATATCAT TTTCTGCTGCA GAAA AGAACAATCGCTCAATTATTGTTGTAGCAGCA GGATATC  
AAA GCCCTGCTGCTCAACTATAACCAAGATGCTATAGCTCTGTGCGAAGATCTA TTTA ATGAACAGCTATT  
ACGATGCTT TTTAATCC CTCCC GCAAGTCACT ATCC TGTACCAACTC GA CAAA GCAC TGTGACAGCTCCG  
GTAGCACAAGGCAT TTTA TTAGACT TTTATCC TTCTGAAGGAGATCC CCTCTTAACCC TTTCC TAGAAC  
CCAATAAGATCTC TTTCCCATTC GAAA AGGAGATCTTCTAGGCCATT GGATTTTA TCCACCC TACTGG  
AGAGAAT CAACATTC TATCC ATTC CTAGCAGAGAGCGATATCC TCCCTAC TTTAAA GCAACGAATTCTT  
TTAAT GAGTCTTCGTATACTTACCAC TTATAGA ACTTACGTTCTT ATCC TACTC CAAACAAA GATCTATC  
GTAG GAAA AAGCAACCTCGTGCACAAA ACTT TTTCTAACCC TTT TTTCTCTTA ACTCTCTATCTAAGA  
AATC TTTAGCGGACTTTT TTTCTGCTTT TTTCTAAGAT TTTCCGGTTGTTAGAGAAA GTCTTT TTTCTGT  
CCCGTTC TTTCTCAAGAGCT CAAA TTCAGATTGCG TAAA AGGACTC CTATGTTCA TAAA ATCT CAAA TTC  
ACTTGTGCCTGCTC TTTAGTCTT ACCCAACCGGGCTCTTCTCTGCTGCGCCCATCTCCGCAC ACCCATC  
TGTTAC GAAA AAGCTCTCATTGCGGCAACT ATTC AAACG TTTCTTCCAGAAA CCTCTCATAAT TAAAAA  
GAGCGTACTACCA TTTCTTAAA ACATGTAAGTCATGCTCTCAAACGTC CCGAAA TATGGAAT GATTTAC  
AAAATCTTCTCCTT ATTC TCATGCAATTC GAGCAG CAAACCAATCAAGAAGTAGT TCTCGCCGT TATGA  
AGAAA TCC TTTGCAAATAATAGAAA AAAGAATTC ATTTCTATT ATCC GAGCAACAGG TTTCTGA ACTT  
ACCGATAT ACTC GCTCCCAAAC CAGGAGACCTATG ATTCCT TTTCTGTTCCATCATCTCTACAT CAAACT  
CGATAG TTTATTC TCTTCCCCAATAGGA GAAA GCAACCGTGTAGCTGCGTACT TTTAAA GAGC ATCCCTCT  
CTTGGCTCGAAGGACCGTCAAT GGAT CAATACTC GTATT TTTA CCATCTTACGTCACCGCCG CAAA TTAG  
AAGC CAAA GTCTTAGCAGAGGG GAAAGAAATCTCTGCACAAACATTAGTT GAAA AGGTGGAAGAGGGAGT  
CACC GAAA ATATTGAGCAAT TTTCAACACCTGCCTTGGCCTGTTCTGCT ACTC CATATCGGACGATCTAGCA  
GAGT GCTTAACAAC GGATTACGGCGAGGAAGAAGCT ATCCGTCTAGCCAAAATATT TTTAGAAGAAGCTC  
CTTGCTCC ATTC GTG TAAA TACTC GAC GAAT CTCTGTAGATAAAA CTC CAAAAGGTTCTGCC TTTCCCTTG  
TCAAAGAGGCGCGCTCCTTCTCATTTGCGT CAAAAA AACGCT ATCC TCTGCAACACACACGAGC ATTC  
CGCAGAGGGCTC CAAAAA TTC AAGAT GAATCC TCTCAAATCATCACAATGCC ATTC TAAT TAAA GATT  
CCGATACTGT TTTA GATTTCTGTGCTGGGGCTGGAGG GAAA AGCTTGATC CAAA CACAACGCGCTCGCCA  
CGTGACCTTACATGATAGCCGTCCGCAAGCCTTAGAGGAGGCTCGTCACCGCTCCCGCGATCAGGAATT  
AAAAAT TTTACT ATTC CATCTCAACCCTT GAAA AAACACAG TTTCTCTCTAGTCGTGGTTGACGCTCCTT  
GCACTGGAAGTGGCGTCTCCGCGAC ATCCAGAAA AAAAGCTTCTCTTCTCCAAACA ACTC CTCCATAA  
CAATTC GATTGCTCAA GAAAAGAT TTTAAAAGAAGCCTTAGCTTATGTCGCTCCACGCGGACGCTTGTA  
TACATCACCTGTTGCTTAT GAAA GAAGAGAAT GAAA AACATACTCTT GGATGGCTCCCAA GGATGGA  
AATGCGT GAAA GAAGT GAAAATTC CGCTAG TTTCCGACAAGG GGATGCTTT TTTCTCGTCGCAT TTTAT  
CCGATCTCGCTCGCTCTAGAATCTTGATCT TAAA CCATCAGTGCAGGTA CTATAGGACGAGGGCTAACGG  
ACG TTTCTTCTAATTCATCTTTA TTTCTTTCCAAA GA ACTTCTGTGACTTGGGAA GGATGATAT ACCCTC  
GTATAAG TAAA AATATCATT TTTATCATGCATAA GAAA ACACAATCACATTC TCA TAAA GGAC TTTCC  
ACAAA GTCTATTGGAG GGATCGATC CAAACTATGTT CAAAGAGCAGGCAATGTGGT ATTCCT TTTAGCCT  
TAGGACACCACTTCTATTATCATA TTTCTTACGCTTG CAAA GGTATG ATTC TGACAGCCGTA CTACGCC  
TTTA TTAGGTCTG CAAA CGATGATGCTGT ACTCTG GAAA TTACCGTTC ATTC CAAA CTCTATTGGAAGA  
ATGCCTGGTATGGTGTGATGGTTGCA ATTC TATGCATTATTGGCCC TTTCCGGGG GAATTC CTAGA ACTA  
TTGCTGTGCTTACGATACGCTAGCCTCGTTGGGAGACAAAC ATCC TACATTA CTCTTCCCTACCTTG  
GTTTAGTGTCTTCT CAAA CGTACTTG TTTACCTCTTCG CAAA CAAGCTCAGCAAGCTGATTC AATGGCTG

GGGTCCGTTTTTTTCCTGTGCATGTTAGGAACTTTAGCCTGGCTGATTATCAAAGGACTCCTACTGCCTG  
CTCATGCACTTCCCTCAGAAAAGCGTAACCTTTTGAAGCAACAAGCCCAAAATTACAGGACTTTTGGAAAG  
TTTTAACACTATGGATTTATTAGGAGCCTTCTTCTGCTCCATAGTCTTGTATCAATTCAGCAACTT  
ATGGTGCAGCAGAAGCATGAGTCTTCTGAAAGAAAACC TTAGAGTTTACCATATTTGGGAAGACTGAGA  
AATACAACTTGTCTATGAGTTTTTTTAGCAGCCGCGCTACTTAGCCTTGTATATCTAGGC AAAACCTT  
CTGTGCTGCCCGTCATGCGGGAGCTCTGATAGATGTTCAAAGAGGGCAAATTC TAGGAA GAATTTTGGCT  
CTTGTAGTTGGCCCCAATAGCTTTTACAGGGCTGAGCGTCTTTCTTGCTTGCCTAACCACTGCAATTG  
CAGTAACAGGGATTTTCGC GGATTTTATCGCGAGAGTCTTTCTCAAAAAATGAGTTACTCAATGC  
TTTTATCGTTACAAA GTTCCCTACATACCTAGTATCGATTC TTAGTCAAAA GAATATTAGCAAGATTC TC  
ATCCCATCAAAGAA TGAGCTATCC TGC ACTCATAGCATTAACTTGCGGTGTATTGCGAAGAAGC CAA  
AGGATTTTCGCCATGTGAAAAC TTTATTTATCTTGTT CAAACACTTACGATACTCTATAAGCTGTCCGT  
TTAATAGACTTAGTCGAATGAAA AAGCCATCCCTTACTGAAT AAGTAAGGGATGTTCT CAAA TCCGGA  
AAGCAACCCAAAAACGCC TTTA GAAGACACCTATCTACTCTAAA ACTCGTTCC TTTCTGCC TAGGTC  
ATGCGCAAGCATGGGAACGTAACAGAGATTGATTC TTATGATTC TAAATTCCTTATCCATG TTTGTCAT  
CAGGCTACCCG TTTCTTACAAGATAATCGAGACTCCATAGCCG TTTCTTTCTAAA AACACTTACAAA  
TCACGATTCCTGATGAAGACTCTCC GGATGGAGAATGGATCAGCACTCTATCATTCAACGATGAGGAGCG  
CAAA TCG CAAA CAGCTTGTAGCTGCCAGATGGAGACTGCTGCGAGCACCTCCTTACCGCTACCTTAGCA  
GCTTACGACCC AACAGAAGGAGCGCTTCTTCATGT GAAACAAA AATCC TCTT CAAAGTGGGGGTAT TTT  
ATCAATTATTCCTAAGTAAGGCTCCTCTACACGCCCGGGAGACAAAGTCTATAACCATACAATCC CAACA  
ACTTTCAGTCTCTCTCCAATGCC TTTCTGCAGAAGCCTTAACTTATTGGCTGCCTATTGTGCACACCTCT  
CCAGAACCTCAAACAATATCTAAAAGAA CATTCTCCAATCCGCATTATACCGAATCGCACGAGA ACTAT  
TCATGTTCTCTCAAAAAGGAGCCTCTTTAGTTATCC AAGAAA ACCCTCAAGGATTCCTTCT TTTATTC TC  
CTTGCAGTGGGAAG GAATAGCTCTATCTATTGAAGTCTTAGATGTTGAT ACCCTAAA AGCATTGTTCCCA  
TTACTG GAATTC TCACAAACCTCTTTA TATAGTGGAGAGCCTTATCTTCTTCATAACGTCCACGTGGTCC  
CTGAACAAGCTAGGATCTATTTTACAAA GAATATCCGCCTCTCCCTAAGTCCAT TAAAGAATATCAAGA  
GACGGTCTTGGGCCCTATTAAGTA TTTCCCGAAGCAAAAAATGCACCTCTATTCT TAAAACACTCTCC  
CTCCCCATACATATTATCC CCGCTCTAGACCGTTCT TTTAGAGAACA TTTACTCTCCCAACTCTGTTATG  
AAA CTGAAGAACGCCCTATTC ACTATGCTATTC ACTTCTTAAGAGACGCCTCTCTCTCATT TTTTCGCATA  
TCTA GAAA CACCAGGAGATCTGTCCGAGGGGCATATTATCTATCC A GAATTC TGCTAC ATTCCTAATAAG  
GGTCTATTAGCTGTATCTGGATTATTATCC CAGAATCTTCGTTACCATACGCTCCGACCATATC GAAA  
ATTTCTTGGATGAGTATGGGCCCTTTTATCAAAGAACCTGGATTC GAAACGT TTTCTAACCAATCC CCGGT  
AGGCTCTCTGTCTTATAACGTTACTGAACAAGGAGTCTTCTATTCCATTATGATACTGGGAACGCTGCG  
GATATAGA ACTCGT CAAA GTAAA TGGACGTATTATTC TCGACAAGGATTC TTTTAAA CAGCCGATTAG  
ACTTAGCTCTCAAGATGGATTGACGATAGAAGCTCCACAAGTCTCGGGATTTTATTC TTACACATGAAGT  
AGCTCT TAAATCTATCC CCAACTTC CAAA CTGCACAACCACCTCTCAAATCCATTCTGC CAAA AAGTGCAT  
AAA GAGAAAAAAGGATCTG GAATCTATTTACAGCCTATC CAAA AAGGATTGGAACAC GAATCTTGTGCTG  
TG CAAA GTCAATT TTTATATCGC GAAA ATGTAGGC TTTAG CAAA CTCCCTGCAGCCTTACAAATGCTCTG  
TCAAATTCCTACAGAGATTCCTGCCGATCAAGTCGCTGAAT TTTA TTACAAT TTTCAAAGATGATCGC  
ATGGTGTCCCTGATCC TCAATTAGCTCTTCCAGAGCGTGTGAGCT GAATATCC TGGCTATTCACAGAC  
CCATCCGTCTTACCCTTTCATC TAAA AATA GAAAT TAAA ACCAATATTGGATCTATTCT TTTAGGGAC  
AGTATTACAAGC CAAAAAAGG GAAA AAAGACTTCTTATTCAGCAAAGCAGGATTC AAAAATCTCGATAAC  
TG TTTACAAAT TTTCTGAAA CAATTC TTATCGTCTCAACGCTATGAT ATTC AAGAAA ATACC TCATCA  
CCATGGTGACAGACATCTCAAATTAGATGCTCTGGCACCTATGATAACAG ACCCTAAT ATTC AAGCTTC  
GGAAGAAGA CAAA GCGTA TTTCTCCAGTT GAAA FCCGCATGTCTGCCTCCTATTC CTGTAAA CTTAT TT  
TCCACGGATCACA AACTCGTCCCTATCAAATAGCGGCTTATTATGGCTGTGGTT CAAATATAACCATC  
GGTTATCTGGACTGCTGTGCGAT GAAATGGGATTAGG GAAA ACACACCAAGCCACAGC TTTACTAGATAT  
TGTGGCGCAA ACTGCAAAAAATCC TAAAT CAAA GTTG CAAA TCCAACAAGTGTGTTGCCGATTTGGAA  
CATGTATTAGCTTCGCACTTACCTCAAGCTTCTCTTT TTTCTTCCATGGTCCTCACAAACC TAAA ACTC  
TCCCTGATTGCGATAT ACTCATCACTTCGTACGGGAC TTTAAGACAAA ACTACGC TTTATTTTA TAAGGT  
ATCG TTTACAGTTGCGGTA CAAA AT GAAATTC ATACAGC TAAAA TAAA TCGAGCCAAATCCAT TAAA ATT  
C CAAA TCG TTTAGATGCGCAAATGAAGCTAGGCCTCACAGGAACGCCTGTAGA GAAT AACTTGATAGAAT  
TCAAAGGACT CAAA GATATTAT TTTACCAATTATCTCCCTTC GGATGCCCTCTTCAAACGATTGTTTAC  
ACATAAA AATGC ATCC GAAA CAGATGAAGATATTA TTTCTTC TAAA GACTTACTACTTAAGCTTACTCGG

CCATTTATTCTAAGAAGAACAAAAAACTCGTTCTACCAGAGCTGCCTGAAAAAGTAGAATCGCTGATTC  
CTTGTCGACTCTCACCAGAACAATCTCAACTGTATTC TTCGCACCAAAGAAAAAGAAA AATGCCAAATCCA  
ACAACCTCGAAAAAGAGGAGGATCCGGCTTCTGTAACTACTTGCATGTACAAA CTTGCTTAACCAACTG  
AAA CAGATCTGCGATCACCC TGCACTGTATTTCAAAGATCCTGAAT CATACAAAAACCATTCCTCTGGGA  
AATGGGCTGCTCAAA TGAATTACTCAACGACTCTCTGGCTTCAGGATACAAAAGTCGTTGTCTCTCTCA  
GTACATCCAAATGATCCGCATTATTGC CAAATATCTGGAAGAGCATGCTATCGAATATGCTCTAGTACAA  
GGGAAATCCCAAATA GAAAAGAA GAAATAGACCGTTCTCAAAATGATCCCAATGTCTGTCTTTATAG  
GTTCTTACTTGTCTGCAGGAACAGGGATTAACCTAACGGCTGGAAA TGTAGTGATCATGTATGACCGCTG  
GTGGAACCCGGCTAAAGAAAATCAAGC CAAAGATCGTGTACACAGAATCGGGCAAAAAAATACCGTTTTC  
A TTTA CAACTAGTAACGGAAGATACCC TCGAAGAGCACATTC ACTACTTAATAGA GAAAAAATGCGCT  
TACTGAACCAGGTAAC TACAACCC AAGATTC CAACATCTTGCATGT CAAAAATCGCGAAGACTTAATTAC  
CATCC TCTCTTACAAAGACGAACATATGCTATCTGAAGAGGTGCAAGAAGACTCGGGT GATTCG TAAAA  
AAGAAA TGATTGACCTTTTATTCTT TTTA CGTATTACCTTGATTT TTTCTCCTAGGAACTATAATT  
CGGGAGGGGGTATCGTCTTGCAACAAGGGGATGTTGCGAGAAGACATACAGATGGCAGTATGGAAGCCA  
TAAA AAGGCCCAAAGACTGT TAAA GAGGTGATCTCATGCCATTCGCAAAGAAGCAGATCTACAGCGTAC  
GTGTG GAAATGCGAAGGAAGCGTATCGGCCTGCATGCCTCAATGTCCCTATTGCAGCGCTTTCTGCAA  
GATCC TCCCGTGACATCTAAGGGGTCTCTTCTTGCCACATTACGTTCCCTTCTGAAGCTTCTAAA AAA  
ATGGAGACAGCGATCTT CAAACTGTCTCTTCCGAAGATTGGGAAGCTGTACTCAATAGCCAAAATACGCA  
AAAGGAGCCTGTTCAAGAGCCTGCCCCCTCCAGTGGGACTGGCTACAATATTGGCCGACTGCAGCTCTC  
TTCTTGGGTGCGGTTTCTTACCTTTTCTGCTCATGATTCCTTGT TTTGACAGACTCTGGACTCGTTC  
TCTCCTGGCCAAA GAATCGCTCATACTATGCATGACTAGTCGGATTC TGCTTGTATCGTGGGTACCG  
CTCTCTCCCTGAGCATTGAAA TAACACTCTTACGTTCCCTATTT TTTCTCTCTGCTACCACTTCTCCTC  
ATTGAGATTTTATCCACCCAGATGTACAATCCGG GAAATGTACAAA TCTGAAGGACCTCTCTTTTCTTT  
CCTA GAAAGGCTTGAAGGAGAATCC TCTTCTCAGATAATCATCTCATATGGATCGTTGCAATCC TAA  
ACACTCATTGAAGAG GAAATGTTATGAATGAAGCTTTGACTGTGTAGTTATCGGAGCGGGGCCAGGGGG  
CTATGTTGCAGCAATCACTGCCCTCAAGCAGGACTCAAACCTGCGCTAATCGAAA AGCGAGAGGCTGGC  
GGAACCTGTTTAAA CCGAGGGGTGATTCCTTC TAAA GCCCTCTTAGCAGGAGCTGAAGTCGTTACCCAAA  
TACGCCATGCTGACCAGCAAAGGATTCATGTAGAA GGATTCAGCATCAACTATCCCGCTATGGTACAAG  
GAAGGATTC CGTAGTCCGTAGCATCCGCGATGGACTTAATGGTCTCATTCCGAGCAATAAGATCACTGTC  
TTCTCTGGAAGAGGCTC CAAAATCTCTTCAACAGAAG TAAA AATCTTAGGA GAAA ACCCTTCTGTAATCA  
AAGCGCACTCATTATCC TAGCCACCGCTCTGAACCACGAGCTTTTCCCGGATTCCTTTTTCGCGAGA  
ATCTCTCGGATTTTATGCTCAACAGGCGTGT TAAA CCTCAAAGAAA TCCCTCAAAAATGGCCATTATT  
GGCGGTGTGTGATCGTTGCGAATTCGCTTCTTATTCCATACGTTAGGCTCCGAAGTTTCTGTGATCG  
AAGCAAGCTCTCAAATCC TTGC CAAA AATAATCCAGATA TTTCAAAAACCATGTTGAT TAAATTCACCCG  
ACAAGGACTCCGTTTCTGTACTAGAAGCCTCTGTATCAAATATTGAGGATATAGGAGATCGCGTTCGGTTA  
ACTATCAATGGGAATGTGAA GAATACGATTACGTTCTCGTATCTATAGGACGCCG CAAAAATACAGAAA  
ATATTGGCTTGGAT TAAAGCTGGTGTTA CAAATGATGAACCGGAGTATCCCTACCGATGCCACAATGCG  
CACAAACGTACCTAACA TTTATGCTATTGGAGATATCACAG GAAA ATGGCAACTTGCCCATGTAGCTTCT  
CATCAAGGAATCATGTCAGCACG GAATATAGGTGGCCA TAAA GAGGAAA TCGATTACTCTGTCTCCCTT  
CTGTGATCTTTA CCTTCCCTGAAGTCGTT CAGTAGGCTCTCCCAACAGCAGCTCAACAACAAAAAAT  
CCCGTCAAAGTAACAAAATTC CCA TTTGAGCTATTG GAAAAGCGGTGCAATGGGCGAGGCCGATGGA  
CAAA CAGCCATTATCAGCCATGAGACTACTCAGCAGATCCTAGGAGCTTATGTGATTGGTCTCATGCCT  
CATCACTGATTTTC GAAATTACCC TAGCAGTTGTAATGAACTGACTCTTCCCTGTA TTTACGAAA CTAT  
CCACGCACATCCAACCTTAGCAGAAGCAAAGGCTGAAA GTGCGTTGTTAGCTGTTGATACCC CATTACAT  
ATGCCCCCTGCTAAA AAATGACCGACTCAGAATCTCCTACTCC TAAA AAATCTATACCCGCCAGATTCCTC  
TAAGTGGCTACGCCA GAAACTCCCTTTAGGGCGGGTACAAA CTCAAACCTGATAATACTATCAAAA TAAA  
GGGCTTCTACAGTCTGTGAGGAAGCCTCTTGTCCGAATCGCACCC ATTGTTGGTCTAGACATACAGCTA  
CCTATCTAGCCTTAGGTGATGCCTGTACACGTGCTGCGGCTCAAATGATATTGACTTCACTA GAAATCC  
CTTACCC CAGATCC TGAAGAAGGAGC TAAAATTGCTGAGTCCGCAAAGC CAAA GGACTCAAGCACATT  
GTCATCACTATGGTTCCGTGATGATTTAGAGGATGGAGGAGCCAGCGCTCTGTCCACATTATTGAAA  
CGTTGCACACAGAAT TACCAACAGCAACTATTGAAGTCCTAGCCTCTGAT CAAA AAGGTAACATTGCTGC  
CTTACATCACTTACTGGATACGCACATTGCTATCTATAATCATAATGTAGAAA CAGTAGAACGACTCACT  
CCAAA TCCGTCA TAAA GCTACCTACCGAAGATCGTTATGATGTTGGAGAATGCAGCCAAATACCTCC



CTAACCTGATGAC TAAA TCAGGTATCATGGTAGGAT TAGGAGAGCAA GAAA GCGAGGTCAAGCAAACCTT  
AAA AGATCTTGCTGATCATGGCGTTAAGATCGTAACTATAGGCCAGTATCTTCGTCCTTACGCAGACAT  
ATTCTGTGAAA AGCTATGTGTCTCCCGAGAC TTTC GATTATTATCGCTCGGTAGGA GAGTCGTTAGGAC  
TC TTTATTTA TGCTGGCC ATTCTGTTCTTAGC TTTAATGC GGATTC TGTT CAAA AAGCCATGCGCCA  
GCGG GAAA CCTCAACCTCTTCGCTACTTCCGAACAAAGATTAGCCACATAACCTGTTTCAT CAAA AAGCAT  
TC TCTGCA GAAA AAAATGTTCCCGATTGGCACTAATCTCCCCA CAAA CTATGGT GAGT GAAA AGGTGTGCG  
TGAGT TATG TTTC GTTAT ACTC TTTC TCG ATCC TTATTT TTTA T CAAA GCTCT TTTC TTCTGCTCGGCTT  
GTGATAGTCGTTCCATGATTACACACGGCTTGTGTCAGGACGTGATGCTAAT GAAA TCGTAGTGCTTCTAGT  
CAG TAAA GGGT CGCTGCACA GAAA GTTCCCCAAGCAGCGTCTCAACAGGA GGAT CTGGAGAACA ACTC  
TGGGATA TTTC GGTTCTGCCGCACAAATTACAGAGGCTCTAGCT ATTCTGAAACCAAGCTGGGCTTCCAA  
GAAT GAAA GGAACCAGCCTTCTTGATCT ATTCTC TAAA CAAGGGCTGGTCCCTTCT GAAATGCAA GAAA  
AATCC GCTACCAAGAAGGTCT TTTC AGAACAAATGGCTACGACCATTA GAAA GATGGACGGTATCGTCGAT  
GCGAGCGTACAGA TTTC CT TTTC TCC TGAAGAAGATCAACGGCCGCTAACGGCCTCTGTATATATCAAC  
ACAGAG GGGT ATTAGACA ACCC TAACAGTATTATGGTGTCTAAGAT TAAA CG TTTA GTTGC GAGT GCTGT  
CCCAGGACTAT ATCC CGAGAACG TTTC CGTAGTCAGTGACCGAGCTTCTTATAGTGACATTACTATTAAT  
GGCCCTTGGGGACTC TCCGAT GAAA TGAT TATG TTTC TGATGGG GGATC ATTC TAGCTAAGCATTC CC  
TTAC TAAATTC CGCCTTGT TTTC TA TTTC TTAATTC TCCTTCTCTC ATTC TTTC CTGTGGGCTACTCTG  
GGTCA CAAAGAAA ACACACACACTGAT TTTC TGCTCT GGGT GGAACAAAAGGATTC CAAA ATCC TGCCCT  
TACTC ACAGCTCTC TTTC ACTC AGAATAAGCCAGCTCCAAA GAAA CTC CTGGAGCAGCAGAAGGTGCAG  
AAGCGCAAACCGCTTCGGAACAACCCCT TAAAGAAA ATGCAGAAA AACAAGAAGA GAAT AACGAGGACGC  
TTAAGTGACAGC GAAT ACC CAAA GGATTC TTAAT ATCC TGATGAAGCAGGCAAAAAGCTGATGAT TTTA GCT  
CAG TTTC TGCCGGAACATCTTCTACTAGATTC TCCGCATCATCA GGATATTC CTCTGCAGTCCCTTATCT TT  
TC AATATGCGTTGGTTAGCAACC ATTC ATCC TTCT GGAT TAGTGTGCTAT GAAA GAATTC CCTCCCGT  
TGTGCAATCGCAATTATTAGCTTGGTTACCTCTCCCTCTAACGCAAGA ACTACTC CCTCTTTTAG ATTCT  
GGAGT ACCC CTGCTACAAAACGCTGCTTAGACC AAA GAGC TTTC TACCTACTTGACTT ACTC AGTAAGA  
AAGTACGTCCTCCAGGCATTACAGAAGAGATT TTTC TCCCCGCTTCTCC TTTC AATGCTATGCTGTACTA  
TGTAGCCCTACCAAATGGCCTTGATCAATTGTCTAGGGC TTTA TACCTTAGCTCAA GAAA TGC GAAAC  
GTAGTCGATCGTGTAGTCAATTGATCGCGTGCAGCGTGTGCT ATCC GAAA CCGAAC GGATGTTTCTAAAT  
ATTG TAAA ACAC ATCC TAT GAAA CATCTGGAACCTACGGCCTT TTTA GCCTCTTGGGAGGAAGATCAAGC  
TTTACGTCATTTT CATCC ATGTTCAAGG CAAA CGCTTCTTAGCTCGCGCTCTAGCAAAGAAGATAGCTCT  
TTCC CAAA GTAT TTTA TTC GCAGACTTGATGTGCGAAGAGGCTATAT TTTC GAAA AAGCATTGCAGAGTT  
CGATAGATAGTCCCATAAT GAGT AT TTTC GAGAGCGCTTAGAACACTGTATCAGT ATTCTTGTGCAATA  
AATCAGAGAGATCTTCTCACTGCTATTAC ACTC CCATATATACAAAAAAGAAGCACC AAATAGCATTG  
TAGATTT TTTC TCCGATGGCTATGT TAAA AACGAGAGCGATCGA GGGT CAG GAAA ACCTCGATCTGTG  
TAAA AAA GAAT GCG ATCC TTGTCTGGCT ATCC CTAG TAAATGACATGCCTCATCGGTTGG GAA TAAAGT  
AACGAGCAAAGGAGCGAGGTTCCCTGCCTGTTGGC CAAA CAAA GGATCC TACCTCGTCAGAA GGAT GA  
AATT TTTC AGTTTA ATATA TAAA GACCAAGAGGTCGTCCCTAA TAAA AAAGTTCTCTCCCAGACGCCTA  
TACTGCGGTGTTAACTGCCAAGA ACTTCTGGA GAAA ACACAAGAAGATTGTGAAGCTTATACACA GAAT  
ACTC ATGAAGAAT GCGCAAAGCTAAGGGAAGAGGCTAA GAAT CAAGGCTTCAGGAAGGAAGCAAAGCTT  
GGAGCAAACAGCTCGCC TTTC TTATTACAGAAA CACAAGCGATGCGAGAACAGAT TAAA GCCTCCCTCGT  
GCC TTTA GCGATTGCTAGCGTCAAAAAGATCATCGGCAAG GAAT TAGAAAC TAAA CCAGAAA CTGTGG TT  
TC TATCA TTTC AGAGTCT TTTAAA AGACCTCACGCA GAAT TAAA C GGAT TGTC ATCC ACATCAATCC TCAGG  
ATCTCGCTATTGTGCAACAACATCGTCCT GAGT TAAA AAAACTC GTG GAATATGCAGATGTGCT TTTACT  
CTCTCCAAAGCCAGTGT ATCC CCTGGAGGTTGTATCATT GAAA CAGAGACCG GAAT TG TAAA TGCTCAG  
CTTGATGTGCA ACTC GCTGCCCTGGAACAAGC TTTC TCTGCC ATCC TAAAACA TAAA AAACCTGCGGACG  
CTTCTACAACAGATCAGCCTCAAAGCAA GAAA GACTAGGTATT GGAT TTTA TCGATTGATTGTTC GAAT  
TTTC TTC TTTC TCTGC ATTC TTAGCGCTCCCTATAGCTTCGCCAGTACTTGTTCGCGCAGCACAAAGCGCC  
TCTTCTTGCTTCCGTGCGGACCGCTCCTCAGCAAGAACTTCCAGCATCTCCA GAAA AAACT GAAA AGC  
CT TTTC GTTGTCCATCTTATCGACCAACGGTAGAAGCTCAACACCTGCTACCTCCTCAAGAAGATC TTTC  
CTCCGGAGCCT TTTC A GAAA CGT ATCC AGA CAAA ACTACGCAAGCCGTT ATCC TTCTA TTTC TTGCGTTA  
TCTCC TTTC CTGGTTATGCTCCTGACCTCCTA TTTAAA AATCATTATTACACTAGTTCTTCTTA GAAA TG  
C CAAA GGAGTACAACAAACACCTCCTAGCCAAGTCC TCAATG GGAT TGCTCTC ATTC TATCGATCTACGT  
TATGTTCCCTACAG GAGT GGCTATGTATCACGATGC TAAA AAAAGGTATC GAGT GAGT GCTGTCCCTCGA

GATCTTTTTCGTCAGAAGGAGCTGAAACAGTACAAAATTGCGAAAACAAATCGAAAGAACCTCTGCGAT  
CCTTCCCTTATAAAAATAACACCFAAACCTCAGATCCAAAGCTTTTACAAAATTCACAAAAGACFTTC  
TCCAGAAGCTGCGCAACAATTAACGCCTTCTGACTTCATGATCATCATTCCTGCTTTTCATCATGGGACAG  
ATFAAAATGCTCAAAAGATCGGAGTCTTGAFTTACCTCCCFTTCCAAATCATCGACAAAGTACGGCAA  
ACGTCCTAGTTGCTATGCAAATGATGATGCTTTCCCTCTATCCATCTCTCTCCCTCTFAAACTGCTCCT  
TGTAGTGATGGTAGACGGATGGACCTTGCTACTAGAAAGGTGATGATTAGCTTTAAAATAAGAGACFTTC  
CTATGCTGATGCTTGCAACAAGFTTCAAATCGATCAAACAAAATATTCATATGAAGCCCTCTTATTAAT  
TCGTGATCAFTTCAGTCCCTCCTATTATCAAAAGCTTCTGTGCTTGCGATATGGTGGCTATFTTCAAGCA  
GCAACACAAATTCAGGAGCAAACFTTCGCTCAAACTATTAAGCTCGTTGTCATFTTCGGAACGTTAATGA  
TTACTGGAGGCTGGCTGTGTAGCATGATTTTACGGCAAACTGCGCAGATFTTCCAAAATTTTACAAATG  
GAAGTAGATTGCCATGGCTACGCTTCCGAGGTTTCFTTCAGGGCTCGGCTCTTCCATATATCGATTATATA  
TTCCAAAGCCAGCCGATTACGCAAAAGACTGCTFTTCTCAAACTAGCGGCACGCATATTATCTATGCTGT  
CGATCATCCCGTTCCTTAGGAGCTFAAACTATTCCTCGTCACCAATFAAAATTGGGATAGCGCTCTCTTGGAT  
GGGATTGCTGCTACCTCAGGTGATACAAGACTCTACGATCGTCCACTACCAAGACCTAGATATFTTCTAT  
ATCCTTCTTATTAAGGAGATCAAAATTGGCGTACTCATCGGCTFTTCTGTTCTCTFTTCCCTTCTATGCTG  
CCCAGTCTGCAGGATCCFTTATTTACCAACCAGCAAGGGATACAAGGATTAGAAGGTGCTACCTCTCTCGT  
ATCTATAGAACAACTTCTCCTCACGGGATCTFTTATCATTATCAAAATGACTATCGTFTTCTGGCTTGCA  
GGAGGACATCGCATTATCCFTTCTGTTCTTTTACAATCGCTTGAGATCATCCCTTTCATGCTGTFTTCC  
CTGAGAGCATGATGTGCTACGAGCTCCTATGTGGATCGCGATATFAAAAATGTGCCAATTGTGCTTGAT  
TATGACCATAACAGTTGAGCGCTCCAGCAGCGGTGGCTATGCTTATGTCAGATTTTATTCCTAGGGATCATC  
AACC GAATGGCTCCTCAGGTACAAGTACCTACFTTCTGCACTGAAAAGCCFTTATGGGATGTTAT  
TCTTAACACTGGCTTGGTGGTTCATTGTGAAAACAAATGATTAFTTCACTCTGGCATGGTTCAAA GAAT  
CCCTACTATGCTCTTCGGAGCTCATCCCTCAAAGTCAAAATGATACAAAAAAGA ACTCCCTCCAAAA  
AAGAGGGAGTCTTACACCACGTAAGTGTAGTCCAAAATTGCTATATGGCCTTACTCATGACGAGAAGTC  
GTGCTTTTATGCTGCCCTTGAGCAAGTAAAATTACAATAATACAAAGCACGATAAAAAGACAGAACAACG  
AAGGAGCCAAAATTAACCAAAGAGCGCAACCCCGCATACCAAAGCATTTTTATAGGCCCGTTFTTAGC  
GTAATAGCTCTGCAGATCAAAATAGCACAGCTAATATCTCAGGATAAAAACCCTAAGACTATCCCGGAGGCA  
ACAAATAACCCCTCCGACCCAAAGATACGAGTTCCGCTATAATCCCAAACAATCAAAGCACACCAGGATGG  
CTTCGCAAGCATGTCGAGATAAAAACCTCTTCATCCCCCCGACC CAAGACAAAATGTGCAATCACGCAC  
TTCAAAFTTTAGAGAACCAAACCTTAGAGGCCGATGGTTCTTGAGGAGCTCTCTTCAAAATCTCGTCC  
GCCATAAGCCATACTGATTTTTCFTTTTATCAAATTAATCTCGTACTAAAATTAATCAAAGATAAT  
TTAAAATAAAAATFAAAACCAATTTAATTAGTTFTTCTTCTTGAACGCAACGACTTCTGTAAACCCCT  
TCATFTTCTGGGTCTACCACAAAAATATAATCCCCAGCAGTCCCTAATGTGTAATCAAACCTCTTAT  
TCAGTAAAGAAAAGATCATATCGATGGAGAATTACCTGCGTCAAACTTTGCAACTCTGTGCGGAAATC  
CGTCTAGTTTAAAATTTCTAATGCAGCAGCTTGCCATAAGCTTTAATAGCCA ACTCTGCTGTGCG  
GCGCTCTCCAAACCTCTTGCCGTACAGTTCTAATTCAGAATAAGCTTTTAGAATTATTGATAAAATGCTT  
GAA GAAT AACGGGATCTGTGAACAAFAAATTC AACCTACCC TGATTGGTATTFTTCTCTTCATAGTTGAG  
AAAATGCAAFAAA GAACGCGTTGTCTTAGTGCCTFTTAGCATCTTGTACAACCAACCGGCTTCTCTTCA  
GGGAGGACTACCGTCTCAAGACAATCCGAACCAAGCTCTCGAGCTCGAFAAAATATCTCATCCFAAAAG  
CAAGCAAAGCCTCTATAACACGATACTCCGCACCTTGAGGAATGAGCTCTGACTGCACATACAGTCCCTG  
TAGCAACCTAGCAAAAATAGCATATGCTGAAGAAAGGATCTCCATAATTCTCCGGAGACTCTTTCAGCAA  
GAATFAAA GATTGAACCTAGAATTA CAAAGCGGCCGAGAAAAAGGGATTTCTAACAGTGCATAGCGCTTCT  
GCCGAACAACGACACTATCACGCTCCTTATCTTGCGTACGAGGCTCTGCTCTFTTCGCCTGGGAAGACAA  
TCGFTTCGTTTATCTCTGTAGATCACTTCAAAA TAGCAGATTGTTGCGCAGAAA AAGCTACTTCTTCC  
TFTTCTTGAAGTCAAA CATAGFAAAFTTCTCTTACGAGTCCCGCAGCATCCAAAGATAACCGGTCACCA  
ACGAGGTFAAACATAGTAGTGTGAAAATAAAATGCATAGGCTCTATCTACCCACAGCAAAAATATAGGAA  
AGAGTCTTTGGTGGCAAGGCCCAACCTTCTTACTAGTGTAAAGTACACTCTATCTGGTCCCTCTCCTA  
GACCTTGATATCTAAGAACFTTTCATTC CATAGAAA GAACATGCGTCCATAAGGAAATFTTCTCCTGACG  
GGCTCCTCTCTFTTCACTCGCTACTATTAGAGAAATFTTCTGAGTGATGGGT CATAGTGTAAACGTCCTT  
TGCACAACACCTGCTAAGTGAAGGATCGACATACACTCCCGATCGAAAGAAA AAATAACTCTTCCCTGAG  
CTTCCATGGCAATAGTGGATAAAA AAGGTACCTCTFAAAATCGATACGTCTTGCTCTCATTGAGAAA GAT  
TCTATACACGTGCTCTFTTCTCTTTATGAGATATCCATATCCCTCCGTGTCCAATACCCFAAAGAACCGAGC  
AGCAAATGATAAGCACGCAAGCGATGAGAAGTTCTGAAAGFAAA AATGCTCGFTTCTTTTTTATCTTTC

TAAA CATAAACACCTCTGTGCAGCGGCTCCCCTTTTC TGGCCAGGGAATAAGTCCACCGTAGCGTCGACC  
GAACA TAAAAGCCTGCCGTCTGCGTTACGTTTTC TCTTAGGAGGGATAGTGTATAGCTATAAGGGATCT  
TGATAGCTTCTCCCCTGCTCGTATACACATACACCC CAACAAGCTCTCCTTCCCC TTTCCAGGGAGAGAGC  
TTCTCTATCCA CAAA CTGAAATATGGCGTCTCCACCGCAAAAAACAGTAATCGATGCATGCAGGAAGC  
TGTAAGC GAAAAATGTCTTCCCTCAAACGAAC GAGTGATCCGTGTA TAAAACACCACACTAGGAATTAACA  
CTGTGCAAAGAAGGGAGAGA GAAA GAAGCACCTCTACTAG TAAA AAACAACGT TTTTC G CAAA AAGGCCAT  
TTTC CGTCCCCTT ACCC TCGCTGTTCA TTC CTTAC TTTTC TTAGAGAACACAACAATATCGTCA ACCC TTGT  
ATTCAT TTTAACAAGAAGATCTTCTCCCAAGCATC TTTAAGAAG TTTCTTTTC CTTCCTTGCACCACGCA  
GAATCTTC TAAA ATCGTTCCCTTA CAAA CGATGACCTCT TTTA GAGACAAA TTTTC CGGAAGCATATTC CA  
TCATAAGGACGTCATACACGCGAGCGCAAT CAAA CTCTG CAAA GAAGAT TTTTC CTT CAAA CAAACTCCC  
TCGCATAT TAAA AGCCAAGGCTCCACCAATAATACCAATGAGGGT AATGACAACCATCA TTTTC CACTAAC  
GTAATGGAT TGT TTTTC TTTTT CAAA TTTTC TTCACAG TTTTC CCTCCTGTAGT TAAA ACG CAAA AAT ACCG  
CTTGTTAACGGAAGAA GGATTGATAACATAATCAATCCAAATAAAA ACCGCCTAGCAACACAAGAACTATGG  
GCTGACACCAGGCAGTT ACCC AAGTCAAT ACCC CAAA AATATCC TCGTTA TAAA CAAA CGCGACATGCGC  
GAAT ACCACCGCAAG ATCCCCGGATTCTTCTCCTAGAGCAACCATCC CAATCACCAGT CAAA GCGTCCAT  
GTACGATGAGATAGCTCACGACTC AAAGATCC TCCACGAACAACTGCTT GGAT CACTTCTTGTAGCTCTT  
CGCGCAAAAAGTCTTGTGATACGGCCTCGCATCC TAATGTGACAGCTTCGATCAA ATTC CCGCCTCCTTG  
CAAAACAGCAGATGTGACGGAACAAAATCGACAAA ATCCTAT TTTA ATCACCAGACTACGCAAAA TAGGG  
ATCTTCTTGATAATTGCCTCTAGAGT CCT TTTTC CCTATCCGTTT TTTTC CAGACTATGCGTAGGGATATCG  
CTCCACCT ATTC CTCCAGCAAAAACA GAAA CTGTACCTACAAAACCATGTACTGCACGAGAAA ACAGC  
T CAAA TGAGCCTTGTCTATCTCCATATCTTCAAAAAG TTTCTTTTC AATGTAGGAAT GACCCTATTAGAAA  
AACACCACAACAGCACAA GAAA ATACCAATAAGATCGCTGGATA AACTCAATGCTGCAGCAAGACT CAAAG  
ATAGTT TTTTC CTTCTCTTCCAACAC TTTAATAATATTCAT TAAA GCGCCTTCTAG ATTC CCAATACTCTC  
TCCAGAACGCACACT ATTC TGAT TAAA AAGAAT CAAAATATGCGGGAACCTCGCTAGAGCTTCT GAAAAG  
ACCC CACCGAACGTAGAGCTTCCATCAAAGAAGTGAGA ACCC CAGCCAGCGCATGTCCCTGATACTGAT  
CTCGCAATGAAGTCAAAGCATCGTATAAGGAGATCC CCGATCGTAATAATAACGTAATTGCTTAG TAAA  
AATAACCAGCTCTGTAGTTGTGACACGGTAG TTTTC TCTCTCGCACC TTTTCGAAT GTCCAGAAT GCGAGCT  
CCTTGAGCAGCAAGAAGCTCTCTTGCCTCTCGCTGATG GAAA GCCTCTACAAAAGAAGCTCGTTT TTTTC  
CGGACTGATCAAGATATGTGCAAAA GAAA CCTAGCCAT ATCC CCTCCTGCT ATTC TGACCCT CAAA CCACA  
CGCAAAACTTCG GAAA GGGT TGTCTCCCAGCAAGAGCCAGTTCT ACTCCATGCTCTAGCAGAGGGCAAT  
ACCC TTCTCGCTCCGCAACACCTCG TAAA ATGTGGTAAGGTCTCCC TAAAGCAA TTTTC AGAACG GAGTGT  
TGTGGTTACATCGACAA ACTC ATAGATCC CTTGTCTTCC CAAA ATCC GGAACGGAAGCACTGTGAACAT  
CCACGTCC TTTA CA TAAAGGAGC GAAA GGATCC TTCCCTAGAGCTCTTAATAAAA GCCTGTTCTTGACAT  
CGGCCACACAGAATTC CAAA CAATGCGTACAAATTC TACGGAC GAGT CGTTGAGCGACAGCCCCTATCAT  
TGTGTC GGATAA TAAA TAAGGCTCT ACTCCCATGTC TAAAAGACGCG GGATTGCA GAAA CAGCATCATTC  
GTATGAAGAGT TAGACACTACCAAGTGCCCCGTCAATGCCGCTT GAATAGCAATCTCCGCAGTCTCTTGAT  
CCCGGATTTC TCCTACCATCAAAACGTC TGGATCTTGTCTTAACAAATGGCGAAGTCC TTTAGAAA AGGT  
TAGTCCAT TTTA GG TTTTCACAGCAA CAAAAGCGACACCAGG GAG TTTATACTC TGGAGGATCTTCTATG  
GTCATGATATTAG TAAA AGGACCT GAAA GGTGTTGTATGACACTATA TAAA GTGGTCGTCTTCCACTTC  
CTGTGCGACCTGTTACTAATA GAATCC CTTCCGGA ACTCCTATCGCT TTTCTAAA GGAGGTCTCCAT TTT  
AGGAGGCATACACAAGCCGCGTATATC TAAAATTACATTGCGCTT ATCCAGTATGCGCAACACC ACCCGC  
TCTCCAT GAAT GACAGGGACCGTACTGACACGCATATCGATCTCTTGTCTCCTAGTTGCAACTTAATGC  
GACCATCTTGAGGCAGTCGGTGTTCGGCGATATC GAG CAAA GTAAGCAC TTTA ATAC GAGTAATAAGAGC  
GGCTCG TAAATGGTTCGGGGGAGCGTGGCGATCGTGTAGAACCAGTCTATGCGGTAAC GAATACG TAAA  
AGATCTTCCACAGGGT CAAAAT GAATATCC GAGGCTCGCTCTTCAATAGCTTCC TTAAGAATCAGATTGA  
GTAACCGCACTACAGGAGCACTGTTCTCTTGATTCTCAAGAAGTTCGTGGTATCAC TTTTC CGATTCCAGG  
CACTACAGCTTCCCTGCATAGACTGTAGCATCTCGGAAGC TTTTC CCGTCTTATCGCTATATAGCT CAAA  
AATCCAT GAATAA TTTTC TGCTTCTTCTTGA GAAA CCAAT GAAA GAGGTT CAAA CGTGATCAACCGCACCT  
CATCC AAAGCCTC TAAA GAGT TTT TTTCAAATGCCTTGCAAAAACGATCTTGTGCGC TAAA TCC TCTAC  
AGGCAGCAATAAT TTTCTTTAAA AAA GAGTAGGGAAGCCGATCTAACAGATCTTGCATAGTGCC TTTA  
TTCCCGTCCATCAT ACTC CACCC TTCTCGAGAGCCGGA GGATTCTTCTCCCATAACGGTAGACTCT TTT  
CTTTTC TATAGCCTG TTTA GCAGCCTGCTGTCTGCTAC TAAA GCTCTGAG GAAA TCATCGTTCTCCCCGG  
GGCGAGCAGCCAG GAAA GCAC ATTC TAATT TTTTC TTCTGTCTCACTA GGATTATCC AAAATCTTCG GAGT

GATAAA CATAAA CATCTCTG CAAA T GAGTCCGAAGCA GAATCC ATACCAAATAAT TTTCCTATTCTGGC  
AACTCTCC TAAAAATG GAATCC CGTCACGAGAATCC ATAG CAAA ATTACAACGAAGCCCCCAATAATGA  
CCGTTTCGCCATCTT GAATCC GAACCTTGTTGTAATA TTTC TGCGTGTAAACATCGGGACGATCCGCATG  
A TTTC TCCCAGTC GAATCAAACGTGATGTCGGTCTC TAAAGTAA TAAAGCTCTTCCC ATCC TCTTCTCCG  
ATATTAATAACGGGAA GAATCTTAATCATAATCC CGTATTGAGCTCGATTGTATTGGGC TTTA TCC TTAT  
CAGAA GAAA CTACAATTGACA TTTC TTCCACAATCGCA ATCC TCGCCG GGG CAAA GTTCATAGTCACGAC  
GGAAGGACTTGCAATTAACGGAC ATCC TCTTGCGCCATGAGAAA CTGATAAGCAAAGTCATAACTAGGA  
ACAATCC CT CAAA CTCCACC CAAA AACAGGAATC CAGAAT GCCCCACTTGCCAC GAAA CGGCTTGC  
TTCCCTGCTTACAAACCTCTTCTCC TAAA CGCAATAGGTTCAATCC AGA TTTA CGTTGATT GGATAGT TT  
TCTTTC AAAAAGCAGAACCTCTATACGCACCATTTT CAAAGGCAC ATCCAG TTTC TTCAACAACATCTTG  
ATCTTGGGTAAA GCTTC TTTC TCAATAACCATAATCAAGGTTCCGGTCTTG GAAT CTGCAA TAAA ACTCC  
CATA TTTC GCAGAACCTTCT TTTA CGGAGCTCCTCAGCGACGTATCTATATGT ACCC CTAATCCATTCCGA  
AGAGGATCCCGC TTTA CTTGAGACTACGCCAGTATCACAATACTAGATGCCCCAGAAGCACCACAAAAG  
AAA ATATCATGTACTTGA GAAA GAAGCGCTGCAAGCTCCTGAGGAT CT GAGTG CAAA ACATGATACCAA  
ATACCGT TTTA TCGGTAGGGCTCTCT ATCC CCTCTTCTAGTTCCC GAATAAGATCTATTGCCCTTCTGAAC  
GATGGGAAGAGCTCCACTTAAAGAAA AGCGAGCGTCCATGGT CAAATAAAGGGACCCT TTTAATCCACT  
CCAGAA GAATCTTCTCCCTCTTTAGC TAAATCTTCTCG GAAA GCTGC TTTC AAAATAGCCAGCA TTCTG  
AGGGTCTATT CAAA TAAAGAAA CAATGCGATGCTCTTGTC GAAT GTTGTCTGATTGTAAGAATTCATA  
GAT TTTAAGGAGT TCGGTAATCTCGCTGACAGCTCCAATAACCAAAC TTTC CCCCCTATAAAAATCAATT  
AACATGGTATCGCTA CAAA CGAACTTGCGCAAAGCTTGTAC ATCC GCTCGTGCATC TAAATT TTTA GAAG  
AAA GTACAAAAGCAATATGTGCCGTCATAGGCAAGCTATCTAGCTCTTGTCTAG ATCCAAAGATACC TAA  
AACACCAG ACTC TTCCCTATTAGT TAAA TACAGCTCCTTAATCC AAGGACTAACCTGTCTGATCC CAATA  
CCC AGCCGAT TAAA AGCAAAGACAAACATTC CTCAAATCC TTC TTTAGGGACCCTAGCTTAGACATGG  
CTGTGATACGCATCGCCCCAACAT CAAA AGGAAT CACATAGATACTCTGTTTCATCTCCGTAATCACTGAC  
CAGATTA TAAA TCGTAG TTTC GGATGATTC CAAAGGGCATAGTCTTTCGGATCC CCCCCC TTTC TGCA  
ACCTCTACTGACCA TAAA TCTTCCAATGAACGT ATCC GTTG TTTA GCGCCGATCAATCGGCTTCGCAACT  
CGTCCCATAACGCTGCGAAGTCTCTCCTCGAGAACGGAGAGACAAAGCTTCTTCGTA TAAA GACAAAAG  
AACATCA CAAA CCTC TTTC AATTCAGCAT TAAA AGAT GAAATATGC GAAAAAGGGGCTAGCG ATCCCGTT  
TTTC CTCTAGAGAAGCCAATT TTTC TGTAATCGTGATG GAAA AACTAGGAACCGTCAAACCTCCCAAAC  
AAAAAGTCCCTAGAAA CCCATAGCCCAAATATT TTTC ACCTAAG ATCC TCCCCCTATACGAGAAT TTTT  
CGTCCCGCTCTCCTGACC TAAA TGACTC TGTGCAACAGTCTCTAGAACCTGCTTAAAGCGG TAAA GAGATC  
GTCTCAACAACGTGCGCT GAGTAT TAAA TACATGTCC CAAAAA ACAAATTC CCCGTCTTCTTATCAA  
TTCT TTTC AAAAAC TAAA AGAGGGCTCCGAAGCTTACCTGATAGGTAATCTTCTAATTGTCTT CAAA AAGT  
TACCC TCTCCAGCGCTCCCTGTAT GGATG ACCC AATCATCTGCA GAAAGAACCAAACGATC TTTC CCT  
GCTGTAATAATAGGGCGAGACCATGTTTCGCAT ACCC ACAAAC GAAA ACTC CTTACCA ACTCTGCGATTT  
CAATAGGAGAA GAAA CTTG TTTC ACCAGCGTGATCTGCTGGCTCATCA ACCC ATCGATGCTCCACAGCTC  
AATCACCATCATCC GATC ATCC AAACGTTGACTTCGAGAAGAGGG ACTC TAGTACCATCTCCTTG GAAA  
GTCTTATAAGGA ACCC ATCGATCC TGATCC CA TAAA AGCACATCTCCAACAGCCAAATATTGGCTATACG  
CTTCCCAGATAAA GACTC GAAA TCTACTC GTTC CAAA GCAGCCTGTATGACATAATCTGCCCTCCATG  
CATAAGAA GAAA CTTATCC CCTCCACACAGC GGATACGCTGC TTTA CAGCGATACTAGGCTCC ACTC GC  
ATTC CCCC AATTTCC ATGTCTGCGAACATCTAGGTGCCAT GGA TAAAGAAA AATGCGCGCGCTCCTTAG  
GAGAAGAGACAGCCCCCTCC TAAA GCGCC TTTC ATACGAACAACAAC ATCC AAAGAACGCCCGTCCGAAGA  
AGGCCGAC ACTC CAACCATAGAG GGGTAGGCTCAGCAC TAAA AAC GAGTG TTTC TTCGTCCGGCCCTTGT  
CGAA GAAA AACCT TTTC CCC TAAAGAAA CTCTT GAAT CGCATTAGTGGTCGCAAGCTC TAAA AAAAA TT  
TACCATTTCGCGCATCC GGACGCTTATTACAGCCAAGGAACACAACTG ATTC CG TAAATCCGGGAGTTTC  
TTCTCGATAGAAA AGTCTTGTAGCGCCCAAGCCCC TGAACACGCAGGCTGCTTCTCCTCTGCTGTAAGA  
GGAGAGCAT ACCC CGGCGATCGCGCTATCAAGGCGGCGCCTCTT ATCC ATTGA TAAA AAAAA GAAA TGAA  
GTTGGCGCATAACAACAGA GAAA CAAAAA GAAT TGTA TAAA GTAAGTGA CAAA GAAA AAAAAATCAATT  
TTTA CAAA GAAA ATAA GAAA AGCCGTTTT CAAA T TAAA AAAAA CAAAAAATCGGCT TTTA TAT GAAA TT  
AAA TGATAATTATCTCGGAAGAGACC TTTC GG CAAA T TAAATTTAAA T TTTC ATT CACACCTATCAGGAT  
CGTATCTTCA ATCCGGATCC CACCTACACCAGG GAAA TATACCC CCGGCTCTACAGTCACAGCCAT ATTC  
AATTGTAGCGTGGC ATCC GAAA AAGGCGATAACCTAG GGGTATTC ATGGACCTCTCTTCCCACGCCATGCC  
CTAGCCCAT GAAT GAACGC TTTC TCC ATTC CATGTGCACG TAAA ATACGCACAGCTTCTTATGAAC ATC

CCGACAAGGCACTCCTGCCCCGACAGAACTCTATGGCTGCACGCTGAGCCTCAGCAACCGCAACGTATCCA  
TCCAATAGCTGCTGTTCTGGAGCCGCTCCAAATGCCACCGTTCGAGTCATATCTGAACAATATCC TTCAT  
AGCAAACGCCAATGTCGATCAACACCACATCCCCCTTTTCAAAGATCGATTCGTTGGAATTGCATGGGG  
GAAA GCCGCATTCACCAAATGCAATAATGGGAGGAAAAGAGACCTTTTCTATACCAAGTTAGCCCAA  
AAGACGTGAAGCATCCGAACCAGTTCCTTTTCTGTAATCCCTGGGCGTAATGCAGCCAGAACAAAATCAT  
ATCC TGCAGAACCTA TTTCCGCAGCTC GAGTCATTTCAAAGATTTCTTCCGTGCTTTTCACACAACGTAA  
CTTCTCCGCAAC TAAACCAAACGGAGAAAATGCATACCCGCTGTTTATTGTTCAAATGCTATCCCGTAA  
GGAGTATACTCGCTGTCAAAGCCTATCGTTTTTAACCTGTATTTTCGATATAACTGCCGAGTTCCTGAT  
CCACACTTTTAGAATAAGAAA CAAGCACCACGTCTGGATACGAGCATAGAGATCTTTATCTAATGGAGA  
CACAAACAATACTGCTTCATCACGAGTGATCAA TAAACTCTGATCGAGCCTGATCTTG TAAAAGTAG  
CTAATATCCTCGTC TTTCTCTATCAAAAAGCATCAAGTGC GCGCTCCACTAGAGAACTTTCGAGTCGCA  
AAATCGGATCAAATTCATATCC TATCTCCTACA TAAAATCGTCATCCAAAATAACCGACGTATCATCT  
CTCCGTCAAACGCTTTTTCAGGCTTGCCAAGCTTCCACAAAATATCAAGCCAAGCATAATCGAATGCTCT  
TGCA TTTCTAGAGAAAACCAACTCAAACAGTATTTTCAACGAGTTGTTCAAAGACTCCCTTACATGC  
AGAGCTCCTTCTTGAGCTAGCGCAACAATCCATTTTTCAGTTCTTCTTCTTGAATAAAAGGCGGCGCAC  
TTTCTATTGCAAACTGTCTGGGCTAATACGCGATAATTCGATTC TAAAGCAGTCAAAGCTTCCAAACG  
CATCTG TAAAAAGTCTGCTTCCAACCTTAGTCATCTGTACAGATGGAGGAAG TAAAACGCAAACAGGCT  
AACCTCGACTCTAAA CGCTCGGATAA TAAAGAAA CA TAAAACAAATG TTTACGCGCAGCCTGTACAATA  
CAACATGGACCCCTTCAGAATCTTCGACTAAAAGAAC TTTA CCTAGGGATGTAA GAAAGCGTACTTTCTC  
AACAAACGAAAAGAGAACTCGAGGCA GAGTCTCTAGACACAATCGTAGCCATCTCTGT TTTCAAATAGGGT  
TGCTGCGAGAAA GTAGGACAAGAAA GCGGGGAGAGACAATCGCAGGAC GAATAGATGGAACGCTGATCC  
CCTCAT TTTCTATAGGGATTT TTTCTGTAGGGAC TTTCAACACAATCTCTTCCAAAGAGGATGATCGACG  
CAACAACGCCTCTGAAATGCTCAACAAGCAAATTACTAATCTGCCCTTCTGTAGTAACCGCACCTCT  
GTTTCAAAGGATGCACATTGAAGTCGCACCACATAGGCGGCAAGAAATAACTTCAATACAAATATAGGGT  
AGCGTTGTGCTGGGATCATCCAAGCATAAGCTTCCGCTACCTTTTATGATATGAAAGACGACTCTACAGC  
ACGATTATTAATAAAAAGCCGCTGTCCCTGCCTAGTAGAACGATGCTGGTTAGGAGAGCC TAAAATCCCT  
AGC ACCGAAGATCCCTTGTCTTATCAATAAAGAATGCTTCTTGAACAAAAGACTCTCCCAAGACTA  
GCGCTACACGCTCTATGAAGCCTTG TTTCTTAGCCACATGGAGTCTTGTGACGACGCTCACTAATCCACGT  
CC ACCAATGCCTTCTGAAGAAA GAACACTAT TTTCAACAACGAC GAATGGCCAACCGATCCATCTGC  
GGAGATTCAAAGAAA GATTGTGCGCATGGGAACATTG TAAAAAAGGAGTGGACCGCAATAGTCGTTCCCT  
GCTGTCTAGGAGCAGGCTCGCAGCAAACAGGCTCGCCTTTTCAATCAACGCTTTAG ACCCAATCC TCC  
TGCACGAGCCGTATGGATCTCCATCAAAGAAATCGAGGCTATCGAGGGCAGAGCTTCTCCCT TAAACCA  
TAACTAGCGAGA GAAAGATATCAGCAAAATGAGCGATC CAAAAGTGGCATGACGTTGAAGCGCCACCG  
GCACCTCTTCTGGATCCATCCCACTCATTGTCTCGCACAACAATCTGGCCTCT ACCCCACCTAGAGT  
TTCGATATGAATTTCATCCGCGCCTGCATCTAATGAATTC TCAATCAGCTCCTTAACTACAGAAGCTGCA  
T TTTCTATGACCTCACCAGCAGAGATCTGGTTAACCCTTACACTATCTAATAAAA CGAATCCGAGAAGCG  
ATAACGACACAAAGCATCTCCGCTATGAT TTTAAGAC TTTACTATTAGCGAGAGACAGCAGAGAGAAA  
GCGTGAAGTCCAAGCC TTTCCGCGCAGGAGGTAACG GAAAATGCAAGGCAACGACACACGCTGCTGCAC  
GATGTTAACTTACGCAAAAAGAAATAGTTATGT TTTAT TAAAAGCAAATAT TAAA AACGTT TTTAT TAA  
TCAACTTGT TAAA TCAGATCGTTA GAATTTAATATGTTAGTAGTAA CAAAT TAT TTTATTTT TTTAGGA  
AT TATCGCGATGAGCACTCATCTTCTAATAATTC TAAAAAACCTTCGGCCTCT TTTAATAAAA AATCAC  
GTAGCCGCTTGGCCGAGATTGCTGCACAAAAAAGCAAAGCTGAGGACAAA GAACAAAAATATCC TGT  
TCCTACGGAAGAGGAGACAAAACAAGTTCTCATGGACATCC TACAGGGTTAAGCAACGGATTAAC TCTT  
CAGCAAAT TTTA GGTCTCTCCGACGTCTCCTTGAAGAGATCTACACCGTAGCATATACCTTCTACTCC  
AAGG GAAATATCGGAAGCTATCGGTCT TTTCAAATCTTAAACGCTCCAAACCTCAATGCTACAAATA  
CATCTTAGGTCTTAGCTCTTGCTATCACCAGC TAAA AATGTATGATGAAGCCGCTCAAAGTTTC TTCCTA  
GC TTTGATGCTCA ACCGAAAACCC ATCCCTCTTACTACATCGCCGATAGCTTGATGAAGC TAAACC  
AACCCGAA GAATCTCAAGACTTCTCGATATTACGATCGATATGTGTAAGAACAAGCCG GAATA TAAAGT  
TCT TAAA GATCGCTGCAGCATTATGAAGCAATC TTTA GATGCCGTGCT GAAA AAAAGAAA TCTGCAAAA  
GGCTCT GAAACACAAGCCTCCTCTCC TAAAAACACAAAAGC TAAA AAAGCTGCTTCTAACAAGAAA AAAG  
CAAAG TAAA AGCAGGGAC TAAA CCAATGAGTAAA AAACATAAGCACAAGCAAGCACACACTTCTTCCAAAC  
CCAAAGTAGAACCTGCGTATG TTTTCGAAAAAAGAAATCTCCTGC CAAA CAAGAAT TGCAAAATGCGATGAT  
TTC TT TTTCTCAAGACTTGCC TTTAGCGCAGATGTTCTCA GAAA TACAAGATGAGAAA CAATTAGCCAAA

ATGATGGCAGC ACTCAGCG GAATGTTAG ACTCTCTTCCTGTG CAAA CTTGACAAAAG GGGTG CAAAACA  
ATCC TAAA GAGGAAGCCAGTTATCTCAAGAAATTTCTAGTATATTCCTCGGCT TAAAACACCTTACGGA  
AACCG TAAATAAA CATATTGCTGATGA GAAATAATCGTCTCGTCTTACAAA GAGT TTTTAGAGAGGTTAT  
ATGTCCC TTTCATCTTCTTCGTCTCCGATAGTAGCAACCTTAA GAATGTCTTGTGCGCAAGTCATAGCTT  
CGACTCCTCAAGGCGTTCCTAATGCAGA TAAA TTAACCGACAATCAGGTTAAGCAAGTTCAACAGACGAG  
ACAAAATCGGATGACCTAAGCATGGAGAGCGATGTCGCTGTTGCCGGAAGTCTG GAAAAGATCGCGCA  
GCTTCTGCTTCTCAAATAGAAGGACAAGAAGTTATAGAGCAGCAA GGATTAGCTGCAGG GAAAAGAACTG  
CATCTGCCGATGCGAC ATCCCTAACCC AAAGCGCATC TAAA GGAGCTAGCTCGCAACAATGCATAGAAGA  
TACTAGCAAATC TTTAGAGCTATCTTC TTTAAGTTCGTTGTCATCTGTAGATGCCACGCATCTACAA GAA  
ATTC AAAGCATCGTATCC TCTGCTAT GGGTGCTACTAACGAGC TTTC CTTGACGAACTTA GAAACTC CAG  
GCCT ACCCAAACCTTCAACGACACCTCGTCAAGAAGTAATG GAAA TTAGCCTTGCATTAGCAAAAAGCAAT  
TACCGTCTTTGGA GAGT CAACGCAAGCAGCATTGGAGAAGTTCCAAAGTACGCAGTCGCAATCTGCGAAC  
ATGAACAAAATGTCTCTA GAATCTCAAGGCCT TAAA ATTGATAAA GAGCGTGAA GAGT TCAAAAAAATGC  
AAGAG ATCCAGCAAAAAGTCTGGAACCAACTCTACCATGGATACCGTTAACAAAAGTGATGATTG GGGT TAC  
CGTGGCTATTACTGTGATCTCTGTAGT ATCCGCATT ATTC ACTTGCGGTCTTGGCTTGATCGGAACTGCT  
GCTGCAGGAGCCACAGCAGCCACGGCTGGAGCTACAGCAGCAGCAACGACAGCAACTTCTGTAACCTACAA  
CAGTCGCTACACAAGTGACTATGCAAGCAGTCGTGCAAGTGGT TAAA CAAGCTATT ATTC AAGCTGT TAA  
ACGGGTATCGTCCAAGCTAT TAAA CAAGGGAT TAAA CAAGGGATCAAACAAGCCATTAAGCAAGCTGTT  
AAGGCGTCTGT GAAAACCC TTGC TAAA AACGT GGGTAAAAT TTTTAGCGCAGG GAAA AATGCTGTTAGCA  
AATCGTTCCC TAAA CTCTCCAAAGTTATCAACAC CAAAGGAAG TAAAT GGGT AACCTTAGGAGTAGGAGC  
TCTTACAGCAGTTCCCTCAACTC GT ATCCGGGAT TACTAGTCTGCAGCTGTCAGACATGCA GAAA GAAGT  
GCCCAA ATTC AAAAAAGAAGTCGGAGCTCTCACAGCTCAATCT GAAA TGAT GAAA GC TTTC ACATTGTCT  
GGCAACAAGCAAG TAAA ATTGCAGC TAAA CAAACA GAAA GCCCTAGT GAAA CGCAACAGCAGGCGCCAA  
AACCGGAGCTCAGATAGC GAAA GC CAAATCCGCAATAAGTGGCGCCTTAGCCGCCGAGCTTAACTATTA  
ATTT CAAA ATGGAGATCGTGTGTTATGACAACAG GAGTACGTGGAGATAATGCTCCAG ATCCCTCATTGT  
TAGCTCAGCTC ACCCAAATGCTAACTCAGCATCCGCAGCTTCAACAG GAAA AACGGTCAGGTAGCCGG  
CGC TAAA CAAGAAA ACGTTGACGCCAGT CAAA AAGACTTACTGCAAGACGCTCAAGGAAGTGGGGGAAGT  
AAA AAGGCTACTGCCAATCAAACATCAAAAAGTAGAAA GAGT GAAA AAGCACAGGCAAGTAGCGGAACAT  
CAACCACAAC ATCCGTAGCTCAGGCTAGCCAAACAGCAACTGCACAAGCCGTTACGGTGCACGCG ATTC  
TGGATTTA ATAGCGAT GGATCC GCC ACCCTTCTTCCCCTACCGAACAGAAGTCAATGGGGT TGTTCCTA  
CGGAAA GGAATGGGAAC TTTAGCGCTCATGGGACTGATTATG ACCCTACTC GCGCAAGCAAGTGC TAAAT  
CTTGGTCTTCGTCTTCCAACAACAAAACCAAGCT ATCCAGAACCAGGTAGCTATGGCTCCAGAGATCGG  
AAA TGCTATTC GGACACAAGCAGGCCACCAAGCCAAAGCTACG GAAT TACAAGCTCAGCAGAG CAAA ATT  
TCAG GGAT TACGAACATAGTAGGATTC GCGGTCTCTGTAGGAGGAG GGATTTTA TCCGCCTCGAAGAGCA  
AAGGAGGGT TAAA ATCTGCAGCCTTCACTAAT GAAA CTGCAAGCGCGGAACCTCTGCGACCAGTTCCT  
AGCAAAAACAGCCACTAGCGCACT GGATGATGTAGCTGGTACAGCTACTGCAGTTGGAGC TAAA GCCACT  
TCTGGAGCAGCTTCTGCAGCTTC ATCCGCAGCTACAAAACCTTACGCAAAACATGGCA GAAA GCGCCTC GA  
AAACCC TCTCTCAAACAGCTAGTAA GAGTGCAGGAGGAT TATTC GGTCAGGCATTGAAC ACTC CTAGCTG  
GTCT GAAA AAGTGTCTCGTGAAT GAACGTTGT GAAA ACGCAAGGAACACGCGCAAC TAAACAAA CAGGG  
CGAGCCTTGTCTTCTGCTATGAACATCTCACAAATGGTGCACGGTCTCACGGCTG GGATCGATGGATCG  
TCGGAG GGGT GATCGGAGCGCAGGTAGCCCAAGAACAAGAAAT GGCTGGTATGGCAGAGGCTCGCGCAGA  
GGAGCTCAAATCTCTTA ACTC AGTTCAAGCCAGTATGCTTCGCAAGCCCAACA ACTC CAAGAGCAATCT  
CAACAGAGT TTTA ATTC CGCACTGCAAAC TTTA CAAAGCATCTCGG ACTC TGCTCTGCAAACGACAGCCT  
CTATG TTTA ACTAATCGAC TTTCTTTC TCGCTCTTA CAAACA ACTC AGCTTCAAGAACCGTAGGC ATCC TA  
AAAGGGCCCTACGGTT TTTCTTTA CTCTGAAGTCAGCACAT ATCC TTGGC GAAA TTCCTCATGG TAAATA  
AGCCGACA ACCCAACACCA TAAA ACCTACAGCAAAACAATAGCCAGGAGG GAAA CTTCTCCAAGAAGCA  
ACCAACCAAAAAAGCTAGCAAATAGAGGCATCAC TAAA TTGCAGAAGGACAGGAAGGTTGAA GAAA AAGA  
ACGCAATAACTTAGCAAACAAGTTATAGCAAATCAA ATTC GAAA AAATCACCAAAGCACCTATCGCCTGT  
AGAAA TAG TAAA GGGT TTTCCACAGGCACAGGGT TCCAAACTTCGGTGACAGCA GAAT GTATTAACGACA  
ACACCC CTGCGATGACCATAGCATAACGATTAATCGCGGT CAT GGATAGCGACTC ACATCTTCGCCCTAA  
T TTTCTGAGCAAAGTCCAACCATAAGAA GAAA GACAGGTAGCTGCTATCAATAA GAGT TCCGGTAATCCT  
AACTGCC ATCCCACTCAGCTACATCTTCGCTACCTCCAACAGCAGGTACACAAGGTA ACTGACTAACC  
CTAAA CTTAATCC CCAAGCTT TTTCC AAGTAACAACCTCTTAAGCTGGACGTAAGAACAAAAAGCGGC

TGTGAAAGGTGAAAATCCATAAAATAAAGCAAGCTGTTGAGGATGAAAGCCTCTGCAATCCAAATAAATTC  
AATACATTAGTTAAAATAGAAACCGATAACGGAGAGCAATACTATAGGCATGATAGCTGGACGCGGCAGAC  
GAAGAGACTCGCGTTTACATAATAGCAGCCCAAAAAGAACTACTCGGCCAATACCATTGACTCCCTGT  
CACAAAATAAGGAGCTGCAGCTTCCATTGCCGACTTGTAAAAGCAAACGAAGAGGACCAGATGAAAGCA  
TTCAGGAAATTAAGAAAATAGCCATGTCACAACAAGGTTTAAAACACACAGGTTTCGTAGAGTACAAGCGA  
ATAACAACGCCTTGACCGCCACCATGAACCGTGTGCACGGATCTACGATCCGTTCTATAGAACAACCAA  
GCTTGTGCTAGCTGTGCACAAAATAAAGGATCTATTGTAGGGCATCTCTGAAAAAAACCAGGTT  
GAAAAAAGTCAAAATTATGGATCTCTATAACAATCTCCAAAAGAAGCTCCTCCGAATCAGATTCATTT  
TATCCTTTATAAAAACCCCTCAAACTTAGTTCGGTAAAAGCTACAATGGCAAACACTCCGCGTAAAAGAG  
ACGATTCAAAACAGCGGCAAAACAGTAAATTTTATTATTTATGGAGAAGGAATGATCCATGTAACCTTGAAT  
CAAGAAGCTTTCGAACTACCAGAAGGCGCCTCGGCGATGGATCTTGCAAATAAGATGAAACAATCTCATT  
GCCAAAATAGGGGCCCTTATTAATGATCAAGAAAAGGATCTTTCACCACCTTACAAGACGGTGATACCGT  
TCTATTCCTCACTTGGATGATCCAAAAGGTAGAGAAATCTTTTTCACACTTCAGCACATATTCATAGCT  
CAAGCCGTTCTACGCTTATGGCCTTCGGCACAGCCAACGATTGGTCCAGTCATCGATCAAGGGTCTACT  
ATGATCAAAACCAATCTTTCATCAGCGAAGAAGATTCCTCGGCTATAGAAGCTATGGCCAAAACGATCGC  
AGAAGAAAATTCCTATCTCGCGTCAGGTTCCTCCAGACAAAAGAAGCTGCTCTTGCCTATTTCCTCAA  
AATCCCTTTAAAGCAGAGCTCATTGCTGAGCTTCTGAAGAAGTAAGAAATTCGCGTATACGCAAGGAG  
AATTCCTGGATTTATGTCGAGGCCCGCACCTTCTTCGACAGCTCCTGTAAAAGCTTTCAGCTATTACG  
CACATCTTCTGCTTATTGGAAAGGTGACCCCTTCTAGAGAATCGCTGATTCGAATATATGGAGTCTCTTC  
CCTACGACCAAGGAACGAAAGAACATCTTCATCAGCTAGAAGAAGCAAAAAAACGCGACCATCGAGTTC  
TTGGAACAAAGTTAGATCTGTTCTCTCAACAACTTGTCTGCTGGAATGCCTTTTCCTCATCCTCGGGG  
TATGGTTGCAAAAGAACGCTTTAGTTGACTACTGGAAAGCCTTCATCAGCGTGCTGGCTATCAGCAAATC  
CAAATCCCAACTCATGAATAGAGAGTTATGGGAGATCTCTGGCCATTGGAAAATTACAAAAGAAACA  
TGTATACCCCTACCGTAGATGAAGAAGATTATGCAATTAACCCATGAATTGTCTGGCTGCATGCTGTA  
CTATAAAACCCAGCTACACAGCTACCGAAGATTCCTTACGGATTGCAGAAATCGGCCACGTACATAGA  
CACGAGCTTTCGAGCTCTATCAGGCTTGTATGCGAGTGCCTACTTCATCAAGATGACGCACACGTAT  
TTTTAACACCTGAGCAAGTTGAAGAGGAAACACTCAATATCCATAACCTTGTTTCGAACTCTATGGAAC  
TCAAAGACTCGAGTATCACTTAGAACTTTCCTACTCTGCTGAACAAGGAACCATTTGGAAGCGATGATCA  
AAGGAACTTGAACAGAGGCCAAAAAAGAGCTCTCGTAAAATCGAAAAACCTTTTATCATAAGCCAG  
GAGAAGGAGCCTTTTACGGTCCAAAAATCGATATCCATGTAAGATGCGATCAACAGGACTTGGCAATG  
TGAACGATTCAGTTAGATATGTTCTGCGGAACGATTCGACCTGAAGTACACAAATGCACAAGGAGAG  
AAAAGTACACCTATTATGCTCCATAGAGCCAAACAAAGATCTATTGAGCGATTCCTTAGGCATTTTATCG  
AACATTTCAAAGGACGGTTCCCCTAAAATGGCTAAGTCCAGAGCATGTTTCGATTATTACCGTCGAGATCG  
CCACGAGGCTCGTGCCCAAGAAATGGCAAAACAATTCAGCCAAATGGGAATCATGTCTCTGTTGATTC  
TCTAATGAGTCTGTCAAGAAAATTCGCAATGCGCAAAACATGCAAGTGAATTACATGATCACCATTG  
GAGATAAGGAATTAGAGACCCACTTACTAGCAGTGCGCACACGAGACAATCGTGTGTTGAACGATATCGC  
TGTCGAACAGTTCTCTCATGTTATTCCTTGAAGAGCTTCGCTCTTTATCCTTGACTCCTTCTTATAGAAG  
GCCGGGCTTGCATAGATTCCTGCCTATGCAAGCCATTAATTCCTTTCACACATCCTCGCCAATCTCCTTA  
CAAACGATCATGGAATTCAAATAGCCGAAACCCTTTAATAACATGTTTCGCTGTAGCAAAAAATTCATAA  
GAATAAAACAAGCAGGCCAGGGCTCTAAAATCTCATCGAGTTAACTATACGATTTCCTTCCCATGGTA  
GTTGCTACAGTAATCCCTGTTCCGTTTACAAAAGACTTATCCCTAAAATAGACTTTCTACCGGAGGGAT  
ACTGTACCCAATAATATAGAAAAGAGGTATCTGGAGAGCTTCTTACTTTATTCATCTCTTTTACCTCA  
TTCGTCATGCTTATGGACAAATCAATAAAAAGGAATAAAAGCAACAAAAAGGAGCGAGGCTTCTCTCC  
CCTACAAGGGCTTACCTCGTGAATAACATGAAAACAATCGCTGTTAATAGTTTCAAAGGCGGCACAGCA  
AAAACCTCTACAACCCCTCCATTTAGGAGCCGCATTAGCGCAATATCAAAAAGCACGCGTCTACTCATCG  
ATTCGATGCACAAGCGAATCTTACGGCAGGATAGGCCTAGATCCGATTTGTTATGATAGCCTTGCCTG  
TGTTCTACAAGGAGAAAATAACATAGAAGAGGTCATCCGTCCTATTGATTCCTCAGGATTAGATCTCATC  
CTGCGGATACTTGGTTGGAACGTGTGGAAGTCTCTGGATCTTTCGCTGCTGATCGTTATTCATGAAC  
GATTAAGATTATTCCTTCTAAGATAGAACATCGATACGACTATGTCATTATCGACACACCTCTCTTT  
ATGTTGGCTCACAGAATCAGCTCTAATCGCTGCTCAGCATGCACTCATCTGCGCTACACCAAGAAATTCAT  
AGTGTAAAAGGCTTAAGAAAGGCTTGCACCCTTATTCCTCAAGGGATCTCATCGCGACACCCCTCTCAATAT  
TAGGAGTACGCTATCTTCAAGAAATACAGAGGAAAATAACGCAGCCTTACAGAGCTAATTCAAAA  
AACGTTCCCTGGAAACTTCTTAAACGCGCATACGCAGAGATATTACTATCTCAGAAGCCGCTATCCAT

GGGAAACCTGTTTCTCCACAGCCCTTCAGCGGAGCCTCGGAAGACTATCTAAAATTAACCTGAAGAAC  
TGCTATTCAAAATTAAGGAACATCTAACGTTATGGGAAATATTAACCCCTTTAAGAATCGCTTTAAGA  
AACCTACACCCGATAAAATGGAATCCCTCGCTAAAAGCGTTAAGAAGGAGAGCFTTCTCCTTTCTAAA  
TGGGTTACTAATCCTAAACTCTCTTCGCAAGAGGAAGCTAGATTCCTCAATTACTAGAAAGACTACTCC  
TTTTCAAGGAAATCTCCATAACGATCTCCAACAACGTGTCTACTTATCTGCTCAGGTAAAACAGATTC  
ATCATCAAGCTGTCTTCTCCATGGTGAGCGAATCAAAGAAAGTTTCGTGAATTATTAACCTATCGAGA  
AGGAGCTTTTCAGCTTGGCTCTTACTCACCTATGGGAATCGGCAGACACCTTATAATTTCTTTAT  
TACGAGCTATTCCTAGCTCTCCAGACACTCTTAAACTCGAGTTAAGAAAGACTGCCTCGACAAGCAGTGT  
ATACACTAGCTTCTCGAGAAGGCTCGCAAGAGAAAAGAGGAAATATCCGTAACCTATCAAGGTGAAAC  
TCGTGGAGAACTCTAGAAATATCCGTAGAGAAATTTTCCTACTTCTACCGATCGACGTCAATCATCC  
CTTGCCCAACAAGCTTTCTTTTCAAAACAAAGGAACAAAATATTACAGCGATGTACAGACAFTTCTC  
AAGAAGAGCTCCTCTCCCTGGAAAATTTGATTAAGAAAGTTACAACAAAGTTACAACCTTCTTTCTAA  
CACTAAGGTATCCCGTAATGACGACGAAACCCAAAACCTCTAGAAAATCGATAACAACAGTTCTCTGCTCAA  
AGAAGGCAAATTAAGAAAGAAATCAAAACACGCTATTGGGTATACAACGTTTGAAGAAATTTCTAAAATGTA  
GTGTTAACTGCGCACAAGGACAACAGGAGCTTGCAAATTTTACAAAAGATGTTGATCAATGGGAAGT  
TGTTGCAAGAGCTACCTGCAGGACAAGAAACAACTGCACAAAGTCTAATTGTACAAATTTATGATGCCGAT  
TCGTGTTGCGAAGGATATCCATGAGCGCGGTGAATTCATCAATTTCTATTACTTCCGATATGCTAGCTCAA  
CAGGAACGCTGCGTATTTTTAAACCGACTCTCTCGAGTTGATGGGCAGGAATTTCTACTCATGACGGATG  
TACAAAATACCTGCCATCTCATCCGCCACTTACTGTCTCGTCTGCTTGAAGCGCAAAAAATCCATCGG  
AGAAAATAATCTCCAAAGAAATCCAAAGATCTCGATTCCTTTCGCGCTCACCAAAAGAAATTAACGAAA  
TCTGTGTAATCTATTCCTAACAATCATCTTTCTAAAAGATGATGTTACACAGCCCTGAATCAGACTATTT  
TTAAAAGCAGGCCTTAGGGCTTATTTTTCGTAATAATCCAGAGATGCTTGCATCGATAAAATTAAGAA  
TTAAAGAAAAGCAAGGAGCGAGGTTTTCCTCGTGAAGTCAACTATGAAAACAAAACGCGTTCTTAC  
CGGAGATCGCCCTACTGGGAACTTCACCTAGGGCATTGGATCGGCTCCATTATGAATCGTCTCCAGCTA  
CAAAATGACTCTCGCTATGATTGTTCTTATTATAGCAGACAAACACAGCTAATTAACGCGCA  
AAGAAGAAGTCTTCAAATAGATAATCATATTTATGACGTTCTTGCCGACTGGCTTAGCGTAGGAATTA  
TCCCTGAAAATCCGCAATCTACCTGCAATCGGCTATCCCTGAGATTTATGAATTAATCTCATTTTTCTC  
ATGCTTACCCCGTTGAATCACATTATGGGTATTCCTAGCATCAAGAAATGGCCAGCAATGCTTCTCTAA  
ATGAAAGAAAGCCTATCGCATGGACTTATAGGATACCCGTGATTACAAAGTGCAGATATTCCTACTTGC  
AGCACATCTTGTCTCTGTTGGGAAAGATAATGAGGCTCATGTAGAGCTGACTCTGTGATATTGCCAAAACA  
TTCAATCGGCTCTATGGGGAAGTGTTCCAGAACCCGATATTCGCAAGGAGAAGTGCAGCCCTGTAG  
GAACCAATGGTCAAGGAAAATGAGTAAATCCGCAATAACGCCAATTTATCTTTCGGATGACGCAAAGAC  
AGTACAAAGAAAATAACGAAAACATAACGGATCCTAATCGGATTCACGCGACAACCCAGGAAGAGTG  
GAAGGAAACCCCTTATTTATCTACCAGCATCTTTTAAATCCCTATAAGGAAGAAGTAGAAGAGTTAAGA  
CTCGCTATCGTCAAGGATGCATTAAGATGTAGAAGTAAAAGCTCGTTTAGCAGAAAGAAATCAATCTTT  
CTTAAATCCCTTTCGAGAAAACGTAGTGAATAGTTGCTCAGCCTAAATTTCTCGAGGAAGCCTTGCAA  
CAAGGAACGAAAATAATGCGTACCGTAGCTCGAGAAACCATGGAAGAGGTGCATGACCATCTAGGATTA  
GCCGAAAATGGCGGACTATTCCTAGCTCTTCTAAATAAAAATACTTAACAACCTATCCATTGTGTGGGAGG  
AGGAGTTCTGAAACAGCAACAAATATTACATGCTCTTTCTCTCCCTTGTGGAGATCAGCCCGAAGCAATT  
CGCAGACTATCCCAAGGATACAGATGGAGTCCCTGCACAAGTCTCTTAGGAACCACTGGATCCGAA  
AGACTTTCACCATGGCAAATGTTATTGCTAACGTGAATGTTCCACTCTGGTACTTGCTCATAAFAAAC  
TCTCGCTGCCAGCTGTACCAAGAAATTAAGCCTTCTTTCAGAAAATGCAGTCAATATTTATTTCTC  
TACTATGATTACTACCAGCCTGAAGCCTATATCGCTCGTAGTGATACGTACATTGAAAAGCCTTCTTA  
TCAATGATGAAATGATAAGCTCCGCCTTTCAGCAACACGTTCTATCTTAGAACGCCGAGATACTCTTAT  
CGTTTCCTCTATTTCTTGATCTATGGAATAGGATCTCCTGATAACTACTCTTCTATGGCTCTCACATTA  
GAAGTTGGTAAAGAAATACCTCGATCGCAACTCTCTTCTCAACTCTGTACGCATGCACTATCAGGCCCTCT  
CTACACCACAACGGAGTGCCTTTCGTGAACGCGGAAGTGTCAATTGATATCTTCTTGGCCTATGAAAGCGA  
TCTTGCTGTACGACTCGAATTCATGAACGATACGCTTAATTCGATAGAGTATGTGGATCCATTAACCTATG  
ATCCCTCCCATACCACCTCGTCCATCACTCTCTATCCAGGGTGCACCTATGTAACCTCCGGAAGCTGTT  
GAGAACAAGCGATCCGCACAATCCGAGAAGAACTCGAGCAACGCATGCTTTTTCAAAAGGACGTCCTGT  
AGAACAAGAAGCCTCTTTCAACGTACCACGCATGATATCGAAAATGATTAAGAAATTTGGATCAAAACAA  
GGAATCGAAGAAATATCCCGGCATTTTACAGGGGCGCTCCTGGAGAGCCGCCAACCTGCCTCTAGACT  
ATTCCTCAGATGATTTCTTTAATTATCGATGAATCTCACCAAAACCTTCCACAATTACGTGCTATGTA



TCGAGGAGATCAGTCTCGCAAACAGTCGCTAGTGAATATGGATTCGACTCCCGTCGGCTTTTGATAAC  
AGACCGCTCACCTATGAAGAAGCTCGTCGTTATTTTCATCGTGTAATTTATGTATCCGCAACTCCTGGAG  
ATCTGGAATTCAAAGAAATCGTGGACATATCATCGAACAAATCATTCGCCCTACAGGAATTCCTGATCT  
CTTACCAGAGATTCGCCAGCTAAAAGGACAAATCGATGATCTCTTAGAAGAAATCCGTCAACGGCTCCGT  
AAAATGATCAAAGAAATTCCTTGTATCTCCGTAACAAAAAATAGCTGAAGATATCGCTGCCTTCCTCG  
CAGAGCTAGGTATTGCTGCTGCATATCTGCCTCAGGAATTGAAACAGCAGAAAGAACGCAGATCCCTTAC  
TGACAAACGATTAGGGAATATCGATGTATTGATTGGTGTCAATCTTCTTCGTGAAGGGATTGATCTACCA  
GAAGTTTCATTGGTAGCGATTCCTGATGCAGATAAAGAAAGGGTTTTACGTAGTAGCGCTCTCTTATTC  
AATCAAAATGGACGCGCAGCTCGTAATATTCATGGGAAAGTGCACAACTATGCAGACCGCATCCTCCATC  
TATGGATCATATGCTCAAAAGAAACAGAACGCGCAAGAAATACAGCTCGATTACAATCAACAACAATAA  
ATCACTCCGCAACCTATTATTAACCGATCTTAGCTAATCCGATTACTAAAAGAACTGGTCAAGAAAGAA  
CTCGTTTAAAATGCAATCTTCGAAAGAGTTGGAAGCCTCTATAAATACCTATGAGGAAGCCATGTATCA  
AGCAGCTCAGGAGTTCCAATTCGATGAAGCTGCGAAGTACCGTGAACAAATGAATGCAGCAAAAAAACAG  
CTCCTCTTTTCAAAAAGGAGAAGAAAGAAATGGGGACTGAAAGGATACCACAGAATGAATCCCTCGCTA  
TGATCCCTTTCTACTAAGGGAATCTCCTCCGAGCCTTCTCCTCAATATTGCGGTCATACATGCTCATCGG  
AGGAAATAGATAAAAACGAGCGAACTGCTTTTCAATTAACCGTCTAGACAAGGATCTTGTTATGCAATG  
TCGTCATCTCCGATATAGAAGCGAGAAGAAATTTTAGATTCTCGAGGCTATCCACATTATGTGTAAAAT  
CATCACTAATACAGGAACCCTAAAGTGAAGCGTGCCTTCTTCTGGAGCATCTACAGGCATCAAGGAAGCC  
AAAAGAACTGCGTGACAAAGATCCCTAAACGTTACCAAGGAAAGGGTCTTACAAGCCAATTTCTAATGTGC  
AAAAGTGTGGTGCCTCGTTTCAAGGATTCAGCGTACAAAACCAAAATTACAGCTGATGCGATTATGAT  
TGATGCTGATGGAATCCGAACAAAAGAAAGTTAGGAGCTAATGCGATTCCTTGAGTCTCCCTAGCATT  
GCAAAAGCTGCTGCAAAATACTTTACAGAGACCTTATATCGGTATCTTGGTGGATCTTTCTCGCATGTGC  
TTCCCTGCCCTATGATGAATCTCATCAATGGCGGTATGCATGCTACAAATGGTCTCCAATTCCTCAAGAA  
TATGATTCGTCCAATTAGCGCTCCTTCTCTAAAAGAGGCTGTGCGGATGGGAGCAGAAGTCTTCAACGCC  
TTAAAATAAATCTTACGAATCGACAGCTGGCTACAGGTGTTGGTGTGAAGGCGGACAACTCCTAATC  
TTGCCCTAATGCCGAAGCTCTGGATCTACTCTTAACAGCAATCGAACTGCAGGATTCACACCTAGAGA  
AGATAATTTCTTTAGCTCTCGACTGCGCTGCTTCTTTTCTATAATACCCAAGATAAAAACCTATGATGG  
AAAATCGTATGCAGATCAAGTGGGTATACTTGCAAGCTCTGTGAGCACTATCCATAGATTCATATCGAAG  
ATGGGCTAGCCGAAGAAGATCAAAAGGGCTGAAAATCTCTATCCGAGACTTTTAGGAGATCGTGTGCAACT  
AGTTGGAGACGACCTACAATGACGAATTCGCAATGATTGCTGAAGGAATCGCTCAAGGACTTGCCAAT  
GCCGTTCTCATCAAAACCAAACTAAATTTGGAACACTTACAGAACTGCAGAAGCTATTCGTTTGAACACTA  
TACAAGGCTACGCTACCATTCCTTTCGCATAGATCAGGAGAAACAGAAGATACTACCATAGCAGACCTTGC  
TGTCGCTTTTATAACAGGTCAGATTAACACAGGGTCTCTTTCCGTTCTGAGCGTATCGCTAAGTATAAC  
CGTCTAATGGCAATTGAAGAAGAGATGGGTCCAGAAGCTCTATTCCTCAAGATTCAAATCCCTTTTCTAAAG  
CATAGGAAAATTCGAAAATAAGCTGGGAAGGGATTGCTTATAAGATCCCTTCCCCCCCCCAAACTTG  
AGGATTTTCTCTGGGAGAGTATGTACAACTTTATAAGCTCCTCTGGGAAAAAAAGAGAAATGACCAT  
CCCTATTCATGAGAAATAATTCATGATCTCCTTACACGCACGATAGGTTTCTTTATGGCTTATC  
TGTGTGGCCGCTATTATGTTCCCTTAGGGATCAATATCTTGCAATTGAACCTCAGCAATACAAAGAAA  
CACTCTCCTCTATCACTTCCGATCTGCGAGAAAATGCTTTTATTTAAAGCTCACACTTTTACAACAACTAT  
TCCCTTAAATATTGATATCCCTGGCTCTCTTTTCAGAAATCAAAATCTAGACAGAGGAGTCCCTGCTGAA  
CCGGATCTTGCTCTAAGTAAAGAAATGGAGAAGATCTTTCACTCACTTATAAGAGATTTCTCTAGTAA  
AAAAAGAGGCTGATGGGAACTTTAGAGTCTTGGCTTCTAGCCGCATCGAACAACTTGGTAAAAACTATAA  
CCAAGAGATTTTCTATCAGATTCCTCAACCAATTCCTCGCTACCAACGACATTCCTGGTCCGATTCCTCAG  
GTTCTGGCTGTCTTACAACGAATATTCAAAATATCAGCTCTCAAGAAGTCTTGGCGTACTCTATACCC  
TTTCTGGATACCAACTATTATTAATGGAATTAATGATCTGAGCTAAAATGATCCTCTCTCCGTAAAAATGCAAT  
TCTCTCTAAAATGGCATCATTCCTCAAGCAACAGATTCCTCTTTTAGATCTTGTATCAATACACAAAACG  
GTTTCTAAAGAGCAATCAATGATGTCTTCTTCCGATGATATCTGCCCCCTCATCTCTTACTACGCC  
CCCCCTTAAATCTCGATCCCTCTTCTTATGGCGAGAAATTCGTTTCTATCAAAATTTGGGAACACAAGAA  
GTGGGGATATATCCACTCTCTACCTGAGATGGATTTCCGCATATGACTTATGAAAGAAATCTATAATT  
CAAACTTCTTTATGGCGACGAACCTTACTGTACCAACTTATTCAATTTGCGTACTTTTAGGAAGCATT  
CAGCTTTTATGTTGCAAAACGCTATCCAAGCCTATCCGGAAGCTGGCTACGGCCATGATGGAACTCG  
TCGCAATCAACACCATCCATATGAACCCGATTCCTGGGCAAAAAATTAATCATCTAGGAGAAATCTTT  
AACTCATGGTGCAAAGCCCTTTCGCAACAGCAATCTTTAGCAGAAAATAATTTCTGAGATCAACAGCATG

CACAAAATGCATTACGACTAGGAGAAGAAGCTCAACAACGCCTGCTTCCTAACCAGCTGCCTGATTC CGC  
AACTACA GAAATCGC TAAAGCCTATATTCCTGCAGTTACGGTAGGAGGAGA TTTCCAAAATATC CAAATT  
ATAGGCGAAGGTCCCAAGC TAAACTCTTTCTAATCGTTGCTGATGCTTCCGG GAAAGGAGTCAATGCGT  
GCGCCTACTCCTTATTCCTGAAAACATGTTACATACCTT CAAAAGT GAGCTCTCCTCTATTC AAGAAGC  
CGTTCAACAAACAGCTGCTCTCTTCTATCAACAGACAGCT GAATCTG GGATG CAAA TAACACTATGCA TT  
TATTGTTATCATTACGCAACACGAGAACTA GAATACT ATTC TTGTGGCCACA ACC AGCGTGTCTCCGAG  
CTCCTAATGGAGATATCTC TTTCTGTCTGC ATCC TGGTATGGCCTTA GGATTTTACCTGAAGTTCCTCC  
TC ACCCTGCTTAC ACTCTCGTTCTTGAAGAG GAGTCTCT TTTA GTGCTCTATACCGATG GGGT GACTGAA  
GCAAGCAATAAGCATGGAGAGATG CAAA GAGAAGAACGCT TAAA AGCATTAGTGGCTTCGTTGAC GAAAC  
AAAGTGCCGAAGAAGCC ATCC AATCTATCATGTTCTCTATTAAGTCT CAAA T GAAA GATTGCCCAACA  
TGACGATATCAC TTTACTCGT CAAAAA ATACCTAAGGAACCTTCCGCTTATTAGTCTTCGCATATCT TA  
AAACTTCCCTAAC GAATCCTTGTAGATTT TTTCT TTTCTACTTC TTTATCGT GCCGTTAAGAAGCTTT T  
TTT CAGTTATCTTCTC TAAA ATATATGT TTTA AGGTGCG GAAT GAGACAGACATTC ACCAAA GAATCC TTC  
TT TTTCT TTTCTCTAGTG ATTCCTGCTCCTCTCCTTCTCAATCTCGTTGTCC TTTCTTTCT TTTCTCTCGC  
GGCTGT TAAAACAACGATC ATTC AGGATCTGCAT ACCCGCACAATGAAC TTTAATTTAGA ACTC GAAAG  
AAAATCGCC ATTC AAAATATT TTTCT GAAACG TTTA GCG GAAA CGTTAGCAT TAAA AACCC TCACAACCT  
CACATGATTT TTTCTACTGAAGCTTATAGTGAGATGATTGCTCTCGGAGATACCGA TTTATCCCTCTGCCT  
AC TTTCTTCCGCTAACGATAGC ATCC GTACAAA GAATCC TCG GGATCCT CAAA TCGTTATATA TAAA AGCT  
CATCC GAAATACGTGATAAGCTT ATCCAAAATCC TGGGAAT GCTAGCCTTATCTCTA TTTCTG AACGCC  
CAGACACCGAAGATCATTACCTTGT T CAAA CAGAACC ACTTCTATCTACGAAG ACCCTCATTAGCCGG  
CT GGGT AATTGC TTTCT ATTC GATGCAAAA ACTACGCAACTATCTCTTCCATAACAACAATCC TATCAA  
GATCTTC CAAA CTATCTCAACCATAAGGAGA ACTTCTCT TTTCTAG ACTCATCTCCT TTTCTAAAATGGAG  
CTT TTTCTCTCTCCATGGAAGGATATCC CGCTCTCTCTT CAGAAA AAGCTTCTTATCC TTTA GAACCTTC  
TCCT GAATTA TTTTAA GC TAAA GAACTGT TAAA AG TTTCTATACACGG GAAAAC TTTCTTAGCCTA TTTA  
TCTCCTTGGCAGCCTATACCACAT ACCCATTC TCTTGGCCTG ATCCCTCTATCC ACTTGCATTACACAAG  
CCTTACGGCTTCCCATCAACGTAATCTT ATTC TAT ATCCCTCGCTT TTTCCAAA ATGGGATGGGTGCTCTC  
TTGCAC TAGCAAACGAT TAAATCGTCCCTTACAAGAGC TTTCTGT CAGTATG GAATCCGCGTG GAAAGGC  
AACCATAATGTCCGCTATGAGCCGCAACCTTATGGCTAT GAAA TCAATGA ACTGGGGAATATT TTTA ACT  
GTAC TTTACTTCTTCTGCTGAACGTCAA GAAA AAGCT GAAA TAGAATATAT TTTCTCG GAAATTTA TTACA  
AAAAGAGCTTGGCTCTTCTCTCTTCTTCT TAAAAGAT ACCCTTCTCTGTCAACGTTG GAATTCCTCCCAGGA  
GGAAC TTTCTC CAAA CATTATTTA CAAGGAGAACAACAACC GGATATT TTTA TGGTT GGGTTGCC ACTC  
CT GAAA AAGATCGCCTCTTCCGAGT GATTGGAATAGCTGGAGATATCGGACTGCCTTCTTATCTCTACGC  
ACTC TCTGCCCAG TTTATTCCTAACGTATGCAAG TTTAGGCTACTCATTACCTTCTA CAAA CCA TAAA  
ACGATGCGAAGC CAAA AT GAAA CAACTGTAGGCAATGAAGCTTCTG TTTCTATAGCTTGTCTT GAATACG  
ACC TTTCTTCCAAGTCATTGTCTGTCTAACAGAAGGTGCTA ATCC TCCA ACTCTATT CATAAA ACGACA  
AGAACATCTCTCACGATGT CAGAACAACAACGTATTGAGACCGGAGAT ATTC TTG CAAA CCTTACTGGA  
GGCCCCACATC ATTC AGTACTT GAAA AC ACTC CTTATAGAAGCATTAC TAAA AGATCCTCTCGCTCC AC  
TCAATTC TAAAAC CAAA CAGAGATGTTAACAACGATGCTGAGAAG TAAA AATCAAACGCAGATCGATGG  
AGCTGTAGGCTT TTTA TCCTTA TCTAACAGTCTCTCTCTAAC TAAA AAAAGCC TTTCTGGCAATCC ACTT  
CGATAGCCTGGTGGAGGGGCC ATTC CGTAATCTATG GGATTCGGATACAACGCCCAAGGATCTCGAACAG  
CAAACCATCGTTC TTTAT TTTCTG AAGGACGTCCACCAATCC TAAA TAAT TAAA TTC CCAAAAATCC AT  
CTCTT GGGTTCCA GGATGCAAAA TAAA ACCAAAATACCGGTAAGCCCAATTC GTATCACCAAAAAGAAGC  
GGAGCT GGATAGGCTA ACCCATAGTGACGCATAGCAGCAATCAGCCTCATA GAAA GATCTTCTTCATGAT  
AAA CACGCTGAT ACCC AGCCATTA TAAACC TTTA TACAGATGTCTGAG ATCC GAGGAAGATAATAGCGA  
ATGCTTCCCTAC ATTC TCTTCTAGTAGGGTAGC GAAT CGATCATA GGATATCC GAGAA GAAATCCCTAAA  
TAAGAA GAAAGATCACTGATAATCTG GGGTAACTGCTGTTCAGAAA CATAAGGCGCTTCATGTACGAACT  
GGCTCGC TAAA TA TTTCTG TAAA GTAGCTACTAC TTTCTCATCATGAACAGTGC ACT GAAAGAAA CCGGA  
GCTCT TTTCTATAGAATTCAGGAATAGATAACGAGAGATCATCACAAAATATAA GAAA TCTTGGGT AAGT  
TCTTGGAGATAGTACCGTGTAC GAAA CGTGTA TAAA CGCATATATTGCCGAT TTTA TC GAAA GAGTAC  
GCTTCAAAAATCC TGATGCTTAGAAA GCCACACATCTCTCAGCCAAGTATAGCTATACCAATCATTAGT  
CCATGCATCTC TAAA TAACGGAGCTCCTGCCGTAACA GAAA ACACATGCGAAGGGGCTGCTGCTAA TAAA  
GAAT GATCCCAT TTTCTACATAATC TTTCTACAGCCTCAGGAAGATC TTTCTAATGCATCAGCAAAAATG  
CTGCCA ACTCATGC GGATCCGCAGGCAATT TTTCTAG CAAAAC GAGTGG TTTCTGAAT TTTCTAAAATAATC

GCCTAC TAAAGTCGTTACTGTTCTCCA GAAACA TAAACCC AAGGGGTATGCGTAACTTGATC TAAATGC  
TG GAAATCC CCTGTG GAATAGGACAATTATAAGC TTCAAGATCC TTTCATTGCAGCCTCCT GAAAC  
GAGGCTCATG TAAA GCCGATACAATACGATGCAAAA GAATAGAAG TTCTTT TTTC TAATCCAGAAA CATT  
ATGCTTCGCTAGGAGATCTCCTTCTATAGAAG TAAA AA ACTC CGTCAAAGCAT GAA TAAATTC TTCGATA  
GAATAAA TCGGCTCCACGTGTTA GGAT GACTC CTCCCATAGG TAAA TAATATAC GAAA GCCCGCAGGAA  
CATCTTGATAATTC CCA GAAA ACTC TCTAATAAA AGCATCGTATACGCTACG GAAA TAGTTAG GGATTTTC  
TCGT GAA TAAAAAGACAAGAGAAA GTCTGGTAGCATGATCATTTT TTTCAGCTTCTCTTGCGCAGCATTC  
CAATCTTG TAAA GCTTG ATTC AATTC TTGTC GAAA ACGCACATG ATCC ATAGCCA GAA CAAA GCTATCTT  
G TTTA TTGATC GGAT TACGCATCC GAC TTTC CACAT ATTC TAACTGCGCT CAAA CTTCTTGATATGTCTC  
TTCACATTGTCTGCAAAGGCTTGTGTCGTAGCTACTTCTTCTGC TAAA AATCTACGTATAA TTTC ACGT  
AAA CCATCC TCATCATCACTGGTCCAACC TAAA GCAA CAAATAAA TGCTGGTGGTTGTTG CAAA ACTCG  
CATCTGCTAACGTTGCTAACGTAT ATTC CCACGA TTTC AATAATAC ATTC TGTGTATCAC GAAT AAA TCC  
CAGT CAAA CTTGCTCGTAAGATTC TAAA TAGCTAAGTACACGTTGACT ATTC GTAGACAAT AAA ACCGTA  
CC ATCC CCTCGCTC TTACG GAAA CCTTCTGCAAACGGAAGCTTGCACTGTAGAAA GAGAAA GCTGAT  
AGTGATGTAACAACT ATCC TGAAT GACATCATGAGCTGTTATCTTCCCAT GAATATCC TGAAC TT CAAA  
ATAGA TAAACTCATTAGCTAGTAGCG CAAA CACCTCACCTGCGAT ATCCCCTGTTGTTG GAAA ATGCCA  
GAAGCTACGAAT GCTGCTTG TAAA TCTGACGAAGCAGCAAGAGT AGCCACAGGAT TGGGATATAAA TCCA  
TTACACAAATAGGCT TAAATAAA TCTCCTACACACGGTAGAAGATTGATCGGAACG GAAATCTCTCGATC  
ACCAACGATACG GGATAT TTTC CCGGAAGATAA TAAA TCTTCCAAATCAC GAAT AAA TAATAAT GGATAC  
TCCCGAT GGATAAGAAT TGCTAATGCTGTTGC GAAA CAAGATCC GACATCTTGTGCGAAATAGG TAAATA  
ATGCGAC TAAA GCGCTTACGTACATGCCGTACGGT TACTGTCTCACTAGCGGGCAGCGCTAACGT ATT  
CCGAAT TAAATCTTGA ACTC TAGCGTAAGAAGGTACAAAAACCTTC GAAA ACGATT TTTA ATTTTC TTGA  
TCATCCCGT TAAA ACTC CAGCATC TTTA ATACATGCTCAC GAAT CGGCCCTTCTCCCTGGCGATACGGTC  
CTAAG GGATATAAAA CA TTTC GTCAACAGCTGAAT AC TTTC AACAACTC GACTAAGTTCCAAATCTCCTTC  
TTC ATTCAGGATATAACTGGCTAACTTCTTGC AATAGCAAGATTTTTT CAAA TAAAGCAACC AAA CTA  
TACGTTGT GAAA TCTTGCAGGTTCTCACACACAAAACCTCCTCCAGTAAGGAAGCTT TTTC TTTA TTAG  
CTAAG GAATCAAATACA GAAA CATCC AAACGAGACATGACGAAG GAA GAGT TT TTTC TCTCCC TTACC  
ATG GAA TAAAATTGCGATGCAATCTTC GAAA CTTAA GAGT CCCCATCTCCAAAAACTCTCTGTT ATTC  
TCTGTTTT TTTC TT GAAT AACGAG GAAA ATAATGCTCGAAA GAAA AACGG GAAA CCTCAC ATCC CATAG  
CT GAAA TGCT TTTC TGT TAAAGGCAACTT TTTA GGACAT ACTC GCACACAATTATGAGCCTGCCAC ATCC  
TTCT ATTC CTC GGGTACCCATCAATGCTCGTAACCG ACTCTCTCGACG TTTC TCTCCAGGATAAGCGT TA  
AAATAACGCGCTTGCGCAATAGCGGCTGGCCCCA TAAA ATCACTTT TTTC ATTTA CTTGTGGCAGGCTT  
CCGTGCAACAGCCACAAGTCATACACATCGACAAA GAGTACAT TAAAG CAAA CTCTCTTGAGAGAT TTT  
AGGGCTGCGCCTTCCCACA TTTC TCTGCA GAAA TCCATCC TT GAAT CTCTTC TAAA TT CAAA AACATA  
ACAGAGCGATCTACAATCAAATCTCGCAC TAAA GGAACCTTAGAAA GAGGGGCTAACTTGATCTCTCT TT  
TAGCATCC ATATGCTCAT GAAT TAATGCAGTGAAGCTTGTCTTG GAATACC ATTC AC TAAA ACTGCACA  
AGAGCCACAAACCTTCTTAGACAAGCCTGTTCCAAACAACA GGATCC ACACGCTCTCCAT GAAT ATTT  
ACAGGATTC TTTC AA TTTC CATGAGAGCACTGATCAC ATTC TCCCCT GGGTGTAGTTCCA ACTC AAAAC  
TTTC CCAATATTA TTTC CCAGGAACGCCTCTA TAAA TATTC AAAA TAAATGTCTC TTTC CAAATTAGCCTC  
CTATATCGG GAAA TGAATATTC GCTG GAATATTC TCTAGCACGACATCT CAAA CTCCCTGTC GAGTGTAA  
TCTCGTAATTCT GGATTC ACATGGC GGGTATCTAC TTTC TTATAT GAAATTTTC TGGCTCATCTACAGAAT  
ATGTAGCGATCGTAGTT TTTA ACCAATT CACATCATCTCG TTTC GAAA ATTC TGG CAAA TAATGAGACCC  
TC GAAATTC GTTTC TTA TAAA GCTCCTGTGCTGATAGCTAGTGCAAGCTTAACATAGGTTCCA CAAAT  
CGAACAAAAT GAAA CGT TTTA TTTC GCAATCGAGAA GAATCGTGTACC GAAA CTTTT TTTA TTTC TTTC TC  
TAAA CTC TTTA ACTTGTGTAGAG TTTC TTCAAGAGCCTTGTTCCTCCT TTTC ACGGTCACATTACTGAC  
CATG ACTC GCGGATCTCTTCATGCAAAGCAAATGCAT TTTC TCCCTTGACGAGAGAAAT CTCTCGA  
GAGATCTCTTGCTCTTGTGCAAAGCTTGATTAAGATCTTGTGG GAATAGATACAACTTCCGAACGATT  
CCACAAATCGTGCCGCTTCATCTCCTGCGACTA ACCC AGCGTA TAAA CACGCTAACAAA GAAT TAGCTCC  
TAAA CGATTGGCTCCATGATATT GAAA ATCTG ACTC GCCACAAT TAAA ACAACCTG GGATATTC GTCATA  
TGTCGATAGCGACTATCGGATCC CTATCGTCACTGGCAGGCCAATCT ACCC AGGCGCCTCCCATAGAAT  
AGTGCACCGCAG GAAA AATGCGCATAGGGACTTT TTTAGGAT CTTACCTG TAAATTTA TGATAGATATC  
TAAA ACAGCCTCTAGCTT ATTCAGAGT CTCTACAGGTAGATGGGT TACATC TAAA AACACTTCGTGACGA  
CCATCAAT ACCC AGACCTGCCTCACATACCTG TAAA ATAGCTCGCGCTCCGACATCTCG ACTC AC TAAAT

TGCCGTAAGCAGGATACATCTCTTCTAGAAAATACCAAGGCTTGCCTGTCTCTCCGCAAGGGCGTCGCGA  
ACCATCAGGAAAAATAATCGTCAAAAGATGAACACCTAGGCACCCAAACTCTTCCTCCTTACCACGAACC  
GATTCAGAAATCAAACGCAACTTATCTAGTCCAGGAATGCTGTCGGATGAACAAAATAAAATTCAGGAT  
TCGCATAGTGCATGCCTTGCATGAATAATCGACCAAAAACAGCTCCTGTACAGATAGTCCGAGTTGGTAGA  
CACAAAAAAATGACACCCAAACCACCCGTTGCAATAATCACCGCATCACCTTGTATAACCTCTAAAACGG  
TGATFGAATAAAATTCATGACGACAACGCCACAAGCTCTTCCTCCGTATTGGTAATCAATCGAACAAATT  
CATGATTTCTCTTTAATGATCTTCCCTTGCCATTCACGACGACGTACCTGCTCATCCATGGTGTACAT  
CAACTGCTGCCCTGTGGACGCTCCACAAAAGACTGTGCGATGATAGAAGTCCCTCCGAAACGCCGCACA  
TCGAGGTTTCATCTGCATCACGGTAAAATGGACACCCGAACCTATCCAGCATATGAATAATGCGTGGAG  
CGGTAAAACACATTTCAATACAGGAGGCTGATCTGTAAAATAATCCCTCCTTTATCGTATCGTAAGC  
ATGAATGTATGGGGAATCATTTTCCTCCAAAAGATTCAGGCTGCATTAATTCCTCCTGTGCACATACA  
GAATGCGATCGCTTGACCTTAGTAAAAGAACAGCTCTACAAAATACCACGATCTGCAAGTTGCATAG  
CGGCAGATAGCCCAGCAAGTCCCCCTCCAATGATAATGACTCGACAACGCTGATTCATCATAACAAATAC  
ATATTCCAAATTACGCTGATACCCATAGCCATCACAAACACACATCCCTACGTAACATAAGATCTGACATA  
ATCGGAGATAGCGGAAGAGATAATGATTCCCCATCGCGAGACAAAACGTCCATATCTCATAAAACCATG  
GAAACAGCAGCTATAACAAAAGCGTATAGAAAATTGCCATCCAATAAGATCCCTAGAGCATTTCTTACT  
GCATAGAAGAAAGCTTTCTTGCTTCTGGAGTAAAATGTACGACTTGTGTGATGCAAAATAAAGCTCGGT  
CTTTTCTTGTAAAACCTGCTCCGTAAAAAAGGTCCTCCCTCAGCAAATGGAACATTCATAATGAAGAA  
GCCTGTTGTTCCCTGTACAACAGAGGGATATCGAGCCGCATCAAAAAGAACAGCAATAAAGTCTTTCT  
TGGATTGTAACCTGAATAGGATACAAGACAAATCGAACTGGATTACATGAAAGCCAGCCCCGGCTAATA  
AAATCCATGCCGTCATTCCTGTAGAGTATATGCCAGATTCCTCCGTAACGTAGGTGTTCTTCCATCTG  
AAGAGAAAATAATCTCTCCTCGAAGAAGATAGCTAAATCCGATGATGGAATGAATACCAAGCGGAAG  
AGCTAAAACAGGTAATCTCAATTACCTTCTAGACCAGGAATCAAAATGAAACAGATCATAAGGTAATGAAC  
CTTGGCTTTTAGCTAAAGAAAGAGGCTAAGATACAATAAGGAGATGTTACACAAAAATAAAGTAA  
ACACACATCCCGATACGGAATGAATACATCGTATAATGAAACGAATGTAGGAAGATTCAAACTACTATCTC  
CCTCCTCATATGAACGCCTCCTTATTCGCCGTCCCTCATGGTTCTTCCCTTCCAATAAGAGCCCTCCTC  
AAACATCATGATGAACAGCGCACTTAATCGCGACGTTAACAAACAGCAGCTATATCCCTCAACTGAAAGG  
CTTCCATCCCTAATTCATAGGAACCTCGTAACCAACGTTGCACACAACTACTAACAGCGCTTGTCAATTCA  
TAAACAGAAATGCCTTTATCTCAGCAATACCGCTAAGGTATGCACAATAAAACTGGTTCCGTTTCTCT  
TACCTCGTAAAGGTGTAGGAGCTAGGTAAGGAGCGTCTGTTTCCACTAATAATCTCTCTAAAGGAATCTT  
CTCTACAAGATCCCTGCAAGCTTTTAGCATTTTTAAAGTCCACAATGCCACTAATAGAAATATAACCAATCA  
CGCGCTAATAACTCTGTGCCTCTTATAAGTCCCTGTAAAACAATGCAACATAACCAGGTTTAGCTCGCT  
GATCCACTCGATATACATGATCTAGGATATGAAAATAATCTTCAAGCTCCTCGCAATGCACAACGAG  
AGGGAGTTCGTGCTGCAAAGCTAGTTGTAATAACGACAAAGAATCTTCAATCGCTCTTGTTCAGAG  
GCTTGCACAGCAAAATAATAATCTAATCCAACCTTCCAATAGCAGCGAGTTTCCATCTTCTGCAGCAC  
GACAAAATTCCTTAAAATCTTCCCTCTATATCATCCGCGCATCCGTTGGGAGGAGTCCAGCAACATGATA  
AAACATCCAATCAGGATAGGCTTCTGCATAAGCAAAAAGACCGTAACAATCAGCTCAAAATAGTCGTTACA  
TTAACTACCCTAGTCACTCCTGCGGTCAAACTCTGTAAAACGACATCTCCAAAATCCCTCTATAAACTCTT  
CGGATGAAAGATGTACATGTGCGTGCCTACTATCTCCATACTTCCCTCATAATCAATCTTTCTCAATCAAG  
ATCATGAAGGAAGAAGCCCTTTTAGCGGAAAATGTTTCTACTTGAATCGTCTACTGAGAAAAAACCATC  
TCTTCAAAGCAGATTGCGATAATCTTTCTGGAAAGTAAGCGGAGCAAAATCCCCGCAGGGTAATACA  
CATAAGAAGGTACACTGGCTCGGCCAAAACGAGCGAGTCTTCTGTAATTCAAAAGATCTTTTTCGTCCA  
ATCTGCTTCAAAATAACTACGCCCTTAGCAGCAAAAAGCTTGCATATTGGCATGAAGAAGAGGCTTATTG  
AGTTGACACGTAAAACACCACAAAACAGTGAATTTTCAAAAACCTGGAATCCCTTTTCGCGTAAATCAG  
CTAGCTTTTCGGGAGAAAAGATTGCCAATCAAAGCTATGTGCAGGAGGGACGTTCTCATCAAAAATAACG  
GACACCTATAGAGGTAATCACTAAGGAACTTAAAATACAGAAAATGAATACAACGGAAGCAAGAAGCCGC  
TGATTACGCGGAGATACAAAGGTTCCCATCTCCCTAGAAATCCATGCACCTACAGCAGCAACCACAATC  
CTACAAGAAAGTAATAGTTACAGCGGTTGCACTGCTCTTACCCCAAAAATCCAGATAAGCCAAGTTGCAGT  
AGCAAGCAACATAAAACCCAGTCAACTGTTTAAAAGTACTCATCCAAAGACCAGGTTTAGGTAATAAGGCT  
AGCATCTTCGAAAAGAAGCAAATAATAGATAGGGACTTGCCATTCCTAATCCCTATAGCAGTAAAATTTG  
CCAGCTGCTTAAACAAAAGACACTGCCATAACTAATCCAAATACAGAGCCAAGAAAAGGCCAGTGAAGG  
AGTTGTAACCAGGGTAGTCAACATCCCAATTGAAAAGAGCTCCCCAGATCTGATTCCTCCTTACCAGTGC  
CCTCCCTCTTCTTGAATTTTCCCTAGGCTCAGACAAATCATTCATCTCAAAAACGCCTAACGAAC

TCAGAGCAAATAAGAAGAAGACAATAAT TAAAACGGCAACAAACATGGGTTCCTTGAAGCTGGAATCCCA  
TCC AATAT CAAA CCC TAAA ACC TTTA ACAAAAACGCACAAAAAGC GAGTCCCCAAAAGCTTACAATAGCT  
CC TAAAG TAAACCAAATCCCTCCAATCACAGAGGAA GAATGGTGATCTGCCGCCGATTTAAT TAAAC TAA  
ATAC TTTCAAAGTAATCAGAGGCAATACACAGGGCATGATG TTTA ATAAGATTCCACCAAT GAAA GCCAT  
AAGAA GAATAGAGAGAAA CCCCCAGCTCAATGCC GAAA GCTGTTCGACTTGATTC TCTTCTACTTGATAC  
GAAGCGACTAC TTTCCCTGCATC ATCC TT GAATATAA GAATCC CTGACA ACCCAAC ACCCTTAGGCATAT  
TTCTTCA GGATG TTTCAACTTCCATATGTACGTAGTCGTTGCTCAAGAGGAACCTCTTGAGCATAAGC  
AAAATCTCGCGTGT TTTCAAGCAATGAACCATGCCTGGGTGCCCCGATCCGC TTTCCCTGCTGGCACAAGA  
ACATCTAAGCCATCAGGCTGATAA GAAA TC TTTA TGGCAGC ATCC AAAGGTCGAGGTTGAGCCGCTAACG  
CACGG GAAA AAGT GAAT GTCTC TTTA CTATTAG GAAT TAACGGCCCCTGATCTATAG GAAT CACAAGAAC  
CC TTGACGAAGAACC TGGGAGACAAGATGCACCGCAAGACAACC ATTC AACTTGCCT TTTA TCTCCAAT  
GGACCG TTTCTATCTC TTTAGAAA CGC GAATATCC GCAACCACCATTTGTAGAATG TTTA TAACCAAAA T  
AAA CAACCCCATCC TCTTC GAAA ATCTCTGGAGT CGGCCAATGTTCTCCAGCAACCTAC ATCC TGATGG  
CAAA TCC CAAGAAA TGCGCAAAGGC ATTC CAAGCTTCCTGGAT TTTCCAGTAGATATGCTCTCCTTCT  
GGAATAGCAATCAAT ACTC CGATACGAAGCACTTCTCCTTCAACAGCTTGTTCCG TTTCACTAACAAGTT  
CTACTGTAGGCGTAGCTCTTCCACTAT TTTCTTCTACACCAAAAACAAGACGTATAGCTGAACAGCAAGCA  
AAGAAA AAATCCATACCATTGCC GAAT CATAAAA CACAAC ACTC TCTCCGG TTTA GCAAATCATCAAACAA  
CAGAA GAGTTGTT CAAA TT CAAA CAATTCATTACACACCAAAAAA GGATCTTGGTTCTATACAA GAAACAA  
ATTAGGATCGTCTAGGA ACTC GTTGGTTAGGTCTACGTCTTATGTTCCA ACTC G TAAA TAATCC CATCA  
TTCAGTCC TTTCAAGAAGCCGATCTT CAAAGAAA GGTCA TTTCT TTTTCGCTGTTGCTCTTTTCGATATG  
TACATGGACAGTCC TCCATCAGAAA CTCTCCATTC AAAA GAAATTTCTAAAATCAGG GAAA TC TTTAAAA  
GAGT TTTAATAAAA AAATCGTCAATTCCTCTCTCT TTTAGATATTCATCCT GAATCCACGCCT TTTA CAG  
ACCTCTAT TTTA CTATCAAACGTGGAACCC TGGAA TACTAGATAA GAATAGACAGTTGGCTCCAGAACG  
AACTCC CAAAC TTTCCGTGGAAGAT ATTC AATCGTTG GAAA CGCTT TTTAATGCAGTGATGCC GAAA TAT  
AGAGCTCTCTTAAATAAAA AATAACTTC ATTC CAGCAACGACCATTAGTCTCGCTCCT TTTCTAGGACTAT  
TAGGGACCG CAAA GG GATTCTATTAGCT CAAA CGCACATTAGTACCGGACAAGCCAATGGGACGATCAT  
GATGGAAGGCTTAGCAACAGCATTAGGAACAAC TATGTAGGGCTA CAAATTGCC ATCCCTCACTAGTA  
GG TTTCAATTATCTACGCGCCACGCCTTCCAAGTCTCTCTGGAAA TCGAGCAAAC TGCTTTTC TTTTAC  
TTAACTCTATTGAAGTCAAATATCGACAAACTAGCTTAT GAAA CGCTTCGTTTA CGAAGATCTAGAAGAA  
GACCC TAGTGTCAATCTT ACTC CTCTGATCGATATCGT CAAA TAAT CAAAATGGCGTT CATGATCGCCA  
TGCCCTTAT TAAA ATTGATCGTATCTC TTTAGCCACA GGATCTTCTCACACCAAGCCTTCAAAAAACA  
AGAGTCTCAGCAAGCT GAAAT TAAA GTG TTTTCGAAA CCATACCATT ACTCTCAATGACCTTCTGTGTCT  
CTCCAA GAGT TACGCTCGCAACTAACAGTCATCC ATCGCGCAAC ACC TAATATAGTTCCGCTGCTCTTAC  
AAGACGGTGATACAGC TTTCAAAC TGTATCAAGAGATCAAATCGACTATCGAAGAAGCC GGATTTTCAGGA  
ACTTCATATTGC CAAA AAGAACTAACTATGCCAAA TTTCAATATGCCCC TTTCCAAA CGCTTCTATAA  
TC ATCC ATATTGCTCTTGGAG GAAT GCTCTT TTTCTCCGCGCCTCAAAAAAGAAGCCTCGTCTCTCCCC  
T TTTAAA GAACGTATCGTCCCT ACCC CCTGAACC TAAAATCACTACCAC TTTA CAG ACTC CCTCTCCA  
CAACCTATTCG TAAA CCGG TAAA AAACGCTCCAGCTCCCGA GAAA AAAGCTGCAAAACCTCCCGGATCT  
CTA ACCCTCAAAAATCTCCTCAAAAACCAAACAAAGC GAGT CCTACGCCGCGTAATGAGACACTAGAA  
AAAACAAGCTACTC TCAAAAATTAGCTCAACTAGCTAATCAGCTGGCCGAAGAGGCTGAGACACAAGAA  
TCC CACATCGCACAA TTTCTTGGCC TGTCAAGCGCAAGTTCTTACT GAAAACAC ATCC TATCAGCAAG  
ATGCCTTCTGTGC TTTATTTCCAGCAGTACGT GAGTCTTCC TTTCCCTGGAGAGGTTCCGCC TAAA ACTAGA  
AT TTTCTAGAGAAGGCGCTCTTCTCCATTGCTCAATCTTACTACTATTAGCCATGCTGA TAAA CAACAT  
ATCC TGAACCAAATTCAGAAAATTCCT TTTCAATC TTTCTTTA GCGCATACAAAAACCTC GAAA AATATCG  
TT TTTCA TATTAGACTGCAGG GAAA TTC TGCTTGAT GAAAGGCTCCGTTGTG TTTCTCCGTTCTCTTCTC  
TGCTAC CAAA TCTTCTCCCTTCCACTC TCCACTGTGAAGA CAAAGAAATTCATGTACGATCAGAAA GCT  
CTCTCCTTCCAATCGCAGTCTC CAAA CTCTCATCACC AAAAG ACTC TCGTCAAGCTTCTTATCTTGC ATC  
CCTCCGAGACTTA CAAA CTGCGGA CAAA GC TTTA GGAGACCTGTTGGCGCCTACAAAAGAGCTGGCTCCG  
CAAACGATC TTTA TAGAAGCGTCTT ATCCAGA ACTGATTT TTTCTTTAAAAAAGA GGGTAAA GGATCTC  
AAAAAAT TTTCTCTCTAGAGCTCTCTGGAGATCC TTC TAAA GATCATCAAGCGATTCATGAGGCTGCAGA  
TCGC ATCCAT TTTCTTCTTACACGCGTTCTTGGAA TTAGCTCAG GAAA AATTATTT TTTCCCTATGTGCT  
ACAAA CTCTTCCACAG GAAT TAAA ACAAGGGGAACTC TGGTCCGTTGATTACGATGGACAACATC TTTACC  
CACTTACCAATGAAC ATTCCTTATCTGTA ACTC CAACCT GGAT GCATATCAGTCAC ATTC CCGCTTATAT

GTATGTTTCTACAAATTAGGGTCCAAAAATCTTTCTGAATACTCTGAACCAGCCTGCAGGAAAA  
ATCCTTGCTATGCAAGGGAATCAGTTTATGCCGACTTTCTCTCTAAAACAAAATCCTCCTGCCTTTATTT  
CTGATAGAGACGGCAATCCTGATCTTCAAATACAATCATTCCTACTAGCTACCGGAGCAATTGGCACACC  
AAAAAAACTCCTAAAATGAAGCTCAAAAGAACACAAGGAAACCCCTCCTTTAGCCCTGACGGCACCCGTTTA  
GTTCAAATTTCTAACAAAGACGGAACGCCTCGTATTTATCAGATGCAAATCTCTCCCGAACAAATTCCTC  
CTCGCTTACTAACAAAAAATATCGAAATAGCAGTTGCCAACATGGTCTCCGGATGGTAAAATAAATAGC  
CTTCTGCTCAGTCATTAAGGTGTCCGTGAGCAAAATGTGTATGATCTGGCTTCAGGAAGAGATGAGCAA  
TTAACTACATCTACTGAACATAAAAGAAAGCCCTTCTTGGGCTGCGGATAGTAACCACCTTGTTATAGTG  
CCGGATCTTCCAATACATCCGAACTATTCCTGCTGAGCCTAATTACCAAAAAAAGTAGGAAAATTGTTAT  
AGGATCAGGAGAGAAACGTTTCCATGCTGGGGAGCAATTCCTCACAACATAAAAAGAAACCTCATGA  
GAAAAGACTATTTTTAAAGCGTTTAATTTATTATTCCTCCTTCTTTTCCTTTCCTTCATGCTCTTATCCTTG  
CAGAGATTGGGAATGCCATGGTTGCGACTCCGCAAGACCTCGTAAATCCTCTCAAAGATTCTGTACCCTTC  
TACTCCGATGAAGAAATTCACAAGCTCAAAATGAAGATCAAAATTCCAAAGAAGAGCAGCTGTACAAAA  
CGAGCGCACAGAGTACCTCTTTCGAAATATCACCTTCGCTACAGATAGTTATTCATTAAGGAGAGGA  
TAACCTCACGATTCCTGCAAGCTTAGTTCGTCAAAAATAAAATCTCCAAAAGCTACGCTATATATAGAG  
GGCCATACAGATGAACGTGGAGCTGCAGCTTATAACCTAGCTTTAGGAGCTCGTCGTGCGAATGCTGTAA  
ACAATACCTCATCAAACAAGGAATCGCTGCAGACCGCTTATTCACTATTTCTTACGAAAAGAACATCC  
TGTTATCCAGGCCATAATGAATTAGCTTGGCAACAAAATCGTCGTAAGTAAATTAAGATCCATGCTCGC  
TAATCGCTTATTCCTAATAACCTTTTAGGGTAAAGTTCGTCTGTTTACGGCGCAGGTAAGCGCCGTC  
AAAAGGCTATTCCTAGCCGAAGTCGAAGACACCTCCTCTCGTCTACACGCTCATCACAATGAGCTTGCTA  
TGATCTCTGAACGCCCTCGATGAGCAAGACAGAAAATACAACAGCTTTCGTCAACACAGGATCACACCT  
ACCTCGACAAGTTCAGCGACTAGAAAAGGACCAAAAAGCAAAAGCAAAAACACTGGCGATTCCTTCGAA  
TCCGTCCAAGATATTCGGTCTTCTGTACAAAAATAATACAAGAAATCCAACAAGAACAAAAAAATTAG  
CACAAAACAAAGAGCGCTTCGTAACTCTTTACAAGCTCTCGTTGATGGCTCTTCTCCAGAAAATTATAT  
TGATTTTCTAGCTGGTGAACCCCGGAACATATTCATATTGTTAAAACAAGGAGAGACCCTGAGCAAGATC  
GCGAGTAAATATAACATCCCGTCTGTAAGTAAAATAAATAAATAAATAAATAAATAAATAAATAAATAA  
CAGATCAAAGAATTCGCCTTCCGAAAAGAAAATAGCTGCTCTTTCTAGATAATAAACAAGTCTGCTGT  
AGGATCCCAATTAAGGAATAACTAGCATGTGGGATGAAATTTACTGTTGCAGTGCAAAGCGAAGCAGA  
GGAGGGAAGCAAAAGTCCGCATACCTCTGCTCTTACTAACAGATCTACATAACAACCTTGGTCATGGA  
CGAGACTCGCCCTCAGGTATTTCTGCTGCTGTGCAAGCTATTATGCAGGGATACGACATACTATTCCTTA  
GAGTCAAGGAAGAAGGCTTCTTTATTGATAGCTATTTCCAAAACCTTCATTTCTTAAATACTCAGACTTC  
ACTAATAATATCGTCGCCTTAGCATTTGCCTGGTGTGCGAGACTTCAACATTATGAAGCCTCGCTGGCT  
CTCTGCAAAAATTAAGAGCCTTCTTCTTTCTAGATCAAGATCTGTACGACTTTCCTTACTTTCAAAG  
ATGCTTAATCCATCGTCTGGAAGTATTCCTTTAATCCCTCTTCAGAAGGCACCATTCACGCTCTCCAGA  
ACGCCAGTTAGCTGGACAACCAATTCCTGTTGTTCTCAAAGAAGATCAATGAATCTAAAATACGCAATTC  
TCGTCAATGGAACGCCCTAAAAGGAAGATCATTGATAACCGCATGACGAATAACCCCATGTTTATCGATAA  
GAAAATAGCTCTTAAGCGAGCGATCCCTCAGGATTCAAAACACCAAAAAGCTTCTGATATTTTAAAGA  
GGGTCTGCTAACAGAGGATATTCGTTCCCTCTATCCCTCCTGCATCTCTCGCTACAGTGAGCCAACGA  
GAATGTGTCTCAATGTCGTCAACGGAGCAACCAAGGACGACTGCACCATGCTCTTCAAATCTACCAATC  
TATCTTAAAAGCATGTAATTCGTAGGACAAACATAGTAAAATCTTTAGGATAAAAAGAAGAGCACTAC  
ATACTTACCACAAAATGCTGCTAGAGAGATTTCTTTCCTTCTCCACAACAACCGCTTTTACCAAAAA  
TCCGGAGCCTGTCTCCAATAATGATCCCATAGTACTCCTCCTAGAAAGAAAACACGCACCAGAGAGGA  
CAAAACCTCTGACCACCTGGTTCGTAGCCAGGTACTCTATCCACTGAGCTACTGGTGCATAGAAAATA  
TAGGGCAGAAGGATACCGTGCCTTCGTAATGATCAAGAAATTCCTCTCAGAAAAGAAAAACCTTCCA  
TTAAAGAATGTTTAAACAGAAAATATTGTTATTCCTCAGAATTTCTCTCTCAACATCGGCTCCTGTG  
AAGCTATAAAGAGCGCAGATGTTAACACAGACCAGTCTGTCCTCCACTGCATGACTTAAAGCATGCTGAAT  
ACAAGAGGCTCCATCACAAATCCCTTGCAAAACAATATCTCCACAAATCCAGAAAATCCGTTAAATCC  
ACTCGCCAGTCCGCTTGAGAGAAGACTTCAGAGAATACTTCTTCTCCACTCTTCCGCTACGGGTAAACGA  
TGGCACAAAAGGCTTCTCTGCGGCACTAAGCACAGCAAAGAAACCAAAACGCTCACTAGGAGAAAAGAGC  
AAGCGAACAGAAATTTCTCTTGGCGCTCGAATGAATGCGCACCCACCTCCAGGCAAGCATCCGTGATCGT  
AAAATTCCTGTGATGGCTCGTATAGAAGAGGTGATATAACCTATCTCCTCCTGAGGAATACAGTCTGCAG  
CAATATGAATACATACTTCGCTGAAAGAAAGCCTTGCCAATCTCCTTCTCAACCTAGCGCTAGCCTCTTC  
TTCTGTAAAAACTCAAATTTATCCGTAAAAGAACACAGTGTCTGCCACTCTGCTTATTGTCTGT

TC TCTAGGGACACAAAGACTGGTAGAA GAAA CACAA ATTCTGCTACAAAGCCTAATCGA CAAA CGATTC  
TCTCTTCCCTCGCTGTCTTC GAAATCC ATTCTGAGAGCAATGTAGCTCCGGTTAATACCGCAATGTCCTC  
TAAA GATTC CCGGGCGTGCTTCCAGATAC TTTC ACAGCACAGACAGG GAAA ACCC TCTCTA CAAA ATT  
ATTTC CAGCATAGCTAATA ATTCTTTA TCAAAGCTTCTGCTACAATCACAAGCGGTGT TTTC CCTGCCT  
GAACAACTGATTGAA GAAATGT TAAA AAAGAT GGGTTC GAATAATGCAGCGGAT GTTC ACTCAC TAAAAT  
ATAAA CCTGGCTAT ATTCTACCGTTCCTG TTTC CGCATGCGTAA TAAA GTAAGGAGAAGCAT ATCC AAAA  
TCC CACACAGCATGCTCTTCGGCATGCCAGTATG TTTCAGATTTC TTCATGTTCTTCTACGATATAGTAAC  
CGTTCTTCCCTCCATA ACCC ACTGCGCTAGA TAAA ACAGAAGCGA TTTCGCTAT TAAA ACGTGCGCGCAT  
ACT GGAT ACATACACTGTATGTTCCAGATCGCTTAGAG GAAATG TTTC TCTATAAAA AAACCTCTT GGAT T  
TTCT TTTC TGCAAGAAGC ATTCCCGAT GGATTTTC ATGAGGATCC AAACCTTTTC TGATACCTGTCATGC  
CCTCCGCTAATAACGCTTCTATTAG TAAA GCTGTGGTT CAAA CCCCATCTCCGAAT CGCATA C GAGT TCC  
CAAGGCAGTATCTC GGATGAG TTTC ATACCTATAT TTTC AAAGAC ATCCG GAAA CAGAATATCC TTCAGC  
AT ACTC TGACTATCTTGC GTTGTCCGCGT ATCC TGGACATTGTGAACAATCGTGC TAAA CCCATAAAGGAC  
CGATTGTCTGA GAAA ACATATGAGATATTACACGCGCGCGGTAAGACTGCCTG TAAA CCTTGTCTTG  
GTCTC GAAA ACTATATAGACAAA ACCC TATTCTCTATCAGCTGCAGTCTT GGATATA GAAAGGCGA TTTAT  
TCTTGTCAAACAACCATC CAAA GATATCTATCAAGCAT ATTCTGGGAGAAGGAA GGGTGTGCTGCTGTTCT  
ATAAA TTGT TTTC TACCTCCGCACACATAGTTCGTAACGGCCATGTGATATACTT CAAATG TAAA CAGA  
CATTC AAAA ATTCC GAATGCCCTAA TAAAT CAAA AAT TGCCTTACGTGAGGCAC TAACCGATCTAATAA  
TAAGAAGGCTTGTCTACCTC TTTAGGGTATAAAA GT TTTC AAAA CTC CAAAATCACAC CAAA TG TTTC  
ATAGGAA GAAA TTG TTTAGGATCTTGAAGTACGACCAA ACTC CAGAACACAT TTTC CAT TTTAAATTTCC  
CAAAAAACGGCTCATA CATAAAA AGGAA GAAA ATGGACGCTGGTAGCCGCG TTTATTTAACTCCTGAGC  
GACCTTAC ACCCATCCATCCAGGGAGCCCC TAAA AC TTTAAA GGAAGCGTATAGCCT ATCCCTATG CAA  
ATGACAGA TAAA GCTCCTATAATACCTGTTGTAGCG TAAA AATATGCAGACTGCGCATCTGGAAT CTGAG  
GACTTGTAGGA ACCC AAATCAATCC TGTATCAGCAAAAATCATGGAGCGCTTCC ACCCTCGCATAGGGAC  
AACTGTCACCGAGGCATT GGGTGCATATCGAGCTCGATA CAA TAAA GCTAGTTCACCTGGTGT C ATCCCA  
TAGCAATAGGGGAT CGCAGG GAAA GCCTC TTTA TCAGGGAGAGGGCCATCGACAAG ATTCCCTCCCATAG  
GAT TGGGACGATCCAGAACAATTA ATTCTTCTTGTGCTCGCAGATGCT TTTA CACTTGAACAATGC  
AGAAA TGAATGAATAGGACCGCACACCAATATCTTGTACATCGTACACAAAACATCGCAGGCCCTCAATG  
ACTTCAGCAGGAAT CTC TTTA GAAGCAAATAGAGAAA T GACTG GGAT ATCTTCTAAGATAGGAT CATATC  
CTGGTGTCTCAGCAAT GGATGCCCCAAAAT ACCC ATGTTCTAGTGTGCATAAAA GC ACTGAGCTTACAAC  
CC TTTA TGCTTGT TAAA AACACAAAAGC GAAT GTTCCCCTTGTGATTAATGGCTGCACTATGAGAAA TC  
AATGCA ACCC GCTTGCCACGTAT TTTC TCAAGATATT TTTC TTCTT GAAACACGCGTTCCAAGCCTACCT  
GTACAAGAGCATAGCTCACATTAG GAAA TAGTAGCGCAAGGAT CACTAGCTTACAGATTGT TTTC ATAAT  
CTCC CAAAGAT CTCTC CAAAACAAGG GAAA CCTTATCTTCTGATT CAAATTTT CAAA ATCTACAGCAAC  
CC TGTG GAAA CTCTT TAAA AATAAAA AAGCTTAGT GAAAGAAA ATTCTTATCGCCGCTATCATCC TGCC  
AT ACTC TCTATACAGAGGTGCTG TTTC TTTT CAAA TCATCCAAAGGGAT TTTA T GAAA ATTCTTATAGCC  
AGTTCTCAT GGATATAAGGTGCGC GAAA CCAAAGCT TTTC TAAA AAAACTAGGAGAG CAAA ATATCTTCT  
CGCTGTAGACT ACCCATCC TACCA ACCC CTAAG GAAA CTGGC GAAA CCC CAGAA GAAA ATGCTATTCA  
GAAA GGCTTACAAA CAGCTCAAACC TTTC GTTGTGACTATTGCTGATGATTC TATGCTTATCATTC CA  
GC TTTA GGTGGACTC CCAG GAAA AT TATCC GCTTCT CAAA CTGGAGAACAGGCAAACGATAAA GATCATC  
GCAAAAAACTTCTTGAGAACATGCGTCT TTTAGAAA ATACAATCGATCGATCGGCTTAT CAAA AAT GCTG  
CGTCGC TTTA ATTCTCCT CAAAGAAA GATCTTCAAAGCTCACGCCCTTTCGGAAGGAACTATTGCG CAA  
AAGGAACGCGGTTCCCTCAGGG CAAA GATATGATCC CAAACAAATAAA ACATGACTACAAGCAAAC TTATG  
CC GAAT TACCAGAGGCAAT TAAA AACCAAG TTTC TCACAGAGCAAAGCATTAGTCAAATTACAGCCCTA  
TGTG GAAA CGGTTCTCGCAAATCACTT ACTCGCGGG GAAAGAGAGT CTC TAAA GACCTCTC TAAA CTAGA  
ACGGAT TTTC TTGCATCTCTGTAA GAAT CTGCTCCGCTCTCGC GAAA TCC GCTTCGAGC CAAA CATTGACC  
AAAGCTCCCTCTTGAAGAT CAAA TGTG TAAA GGCATCTCTAT ACTC ACTGC GGAT TTTC GCAGTTAAGC  
GATGCGTAGGGCT GAAA GAACACGTCT GAATCC CGTCGATCATTC TATCTTCCAATTAATCATCGTCT TTT  
CCCTGTTT TTTA AGCAGATAATTAATT CAAAAA AGTGGCAAC ACCC AAAGAACCC TCTATGTGCAGCCA  
ATGGAGAC GGAT GCGGGCAAGCAAGA ACCGCATGTTGATGCTTAGTCTG GAAA AGCAGATTACATT CAAA  
CCGCGCAGC ATTCC CCCC TAAA ACAAAGATTACGTGCGTCTAT CAAA AATCAA TTTA GTTACAATAGCA  
TCGG TAAA ACGTTCCC ATCC TCGTCC TGCATGAGAGAAGGCTTCCCTGCGCGAACCGTAAGCACGGTGT  
TCAAAA GAAGAACACC TTGATCTGCCAGGCTT GCAAAC ACCC AG ATTCTATTAC GAATCCC TAAA TCGGT

ATG GAGT TCCT GAAA AATATTACGCAAAGATGGAGGTAATGCCTGCCCTCTAGGAACAC TAAA ACTCAA  
CCATGCGCCTGCCCTTCTCCATGATAC GGAT CTTGTCCAAGAAT CACT ACCCGCACTTGATC GAAA GGAG  
TACTC CGCAAAGCAGCAAAAATAT TTTC TTT TTTA GGGTAGATC CAAA CTTGTGCGT ATTC ACTT TTTAA  
AAAAGCAAGCAACTGGGACCAATAAGGCTGAGACC ATTCATC TTTA AGCTGTTCTTGCCAAGACGGGGG  
AGT TGCTCTATAG TAAA AGCCTCGTGATAC ACTC TCCTTAATCTAATGCATAGAGT ATATGC ATTC TC G  
AAAAT TTTC TTCGAA ACCG GAAA ATATATATTACATACATATGCTTAC ATCCGAAT TAAA TGCAGCACAAG  
TTACCGCCGTCACGGCGCCACTACAACCAGTCTGGTCTTAGCTGGAGCTGGAGCTGG GAAA ACTCGAGT  
AGTC ACTCATC GAATCC TTCA TTTA ATAGAA GAATCC CGGCTCG ATCC TAAA CAAAT TTTA GCTATTACG  
TTCACGAACAAAGCAGCTAACGAAC TAAA AGAACGT ATCC AATCGCAATGTCGTGAGCTAGGATATTCAG  
ACGTACCTATGGTAAGCAC ATTC CATAGTCTTAGCG TTTA ATATCC TGCAGCCTCT ATTC ACAA TTAGA  
TAGACAGTC GAAT CAAA TTATTTA TGATCAGAGT GATTCT GAAA AATTAATTAAGCAATGCTTACGCAAG  
CTGAACCTCGA TAAA AAGC CAAA CAATGCAATGCAA TTTA CTATCTCTCAAGCAAAAAATCGCTTGCA GA  
GT CCTGAAGATCTCG ATTC CAAA GAATATCC AGACCC TACTCGCACC G TTTA TGCT GAAT ACCAAGAACA  
GTTACGTGCTGCGAACGCTCTAGA TTTC GATGATCTGTT ATTC CTAACA GAAA AACTGCTGCGCATACT  
GAAGTCCAGCAA GAAT ACGCTAATCATTG GAAA GCCTTGTTGATAGAT GAGT ATCAAGACACCAACCAG  
CGCAATATCTCATTGCCAAACGCTTGCTGCGAGCTCATAACAATATC CAAA TCGTTGGAGATCC CGACCA  
ATCTATAT ATTC TTGGAGAGGCGCCAACATCTCTAATATCT TAAA CAAAAGCAAGATT ATTC GCAGGCT  
TTA GTTGTTCGCTTAGAAG GAAA ACTATCGTCTTGTGGGACC ATCC TAGAAGCCGCTAATGCTCTG ATTC  
AAAATA ATTC TGCACGCTTAGA GAAA AAACATTGCGTAGTG TAAA AGGCCTGGAGA TAAA AT TTTC TGTTT  
TA CAGG GAAA AATGACCGGATGAGGCAGAGCAAGTCTTAGAAGAAA TCTCTAATCTTC ATTC CTA TAAA  
GAT ATCC CTCTCTTGACA CAAA TAT TTTA ATATCGAACGAAC TTTC AGTCTCAATCGTT CGAAGCGGCG  
TTCTTAAGCGAGGTT ATCC CTAT GAAA TTATAGGTGGCA TTTC CTCTACAAGCGTAGA GAAA TCC AAGA  
TATTC TTGC TTTC CTTCGCTTAT TTTC TAATAACTACGACATGGCAGCC CAAA AGCGAACCATTAGCCTG  
AAA AAATGCGGTATTGGAGCTACCACATTAGCCGCTCTTATGAACTATGCCAAAATAACAGACCTACCTA  
TATTGCAGGCTTGTTGGGACGTATTAGA GAAA AAATCT ATCC G TTTA AC TAAA AAACAACAGCAAGGGCT  
TTTC CTTA CAAA ACTCA TTTC CATCAATGGAGCAGCTATACG GAAA CTGCGATCTTCAT GAATTC ATC  
AAT GAAA CG ATCC GCATCACGGAT TACCTCTCC ATCC TCAAAGAAG ATCC T GAAA CCTATGAAGATAGAA  
AAAACAACCTTAGAGCAATTATTAGCA GAAACGCAAATATGGGG TAAA AGCAGT GAAA ACTTGCTGG TTT  
CCTAGAAGATCTAGCTC TAAA AAGTTCCGAGAT GAAA CAGCAAGTTCCCATGATCGCCTCAAGCTCATG  
ACG ATCC ATAACAG TAAAGGGT TAGAG TTTC CTGTAGTCT TTTC TGGTAGGTCTTGA GAAA ACCTTCTTC  
CTCATGCCA ACTC GAAA GGTATGCAT GAAA ATATTGAAGAGGAACGGAGATTGTGTTACGTGG GAAT TAC  
CC GAGCACAAGAGT ATCTCTA TTTA TCTCGACAAAA ACCG ATTC C CAAA GGAACGGAACGCACCATG  
GTCCCAGCAGAT TTTA TTAGCGAGCTTCCGAGGGCTCT TTTAAA CAAATTTA ACCTATGTTGCATCAGC  
ATCAAACAGCATCTGTAGCTC CAAA TCCTGC TTTA CATCTTCAACAGGGACT GGAT ATGCTACAGATGCC  
AGTTGCTGA ACTC GCAACA CAAA TGTCCCAGCAAATCACTATCA ATCC CTGT CAAA ATCTCGATAGCTTA  
GATTC TCCTCCAGAAT CTT TTTC GTT TTTC CCTATTAGCGAACAGC ATCC TTTA CAGAAA CTCT ATCCG  
CATACCTTCTTCGGCAAATTGATACCAAT CAAA CCTCTTCTCAGGAACGTACTATAGCTCAGTATATTGT  
AGGCAACCTCTCCCAGAAGG ACTC TT TTTAGAAA ATCC TAGTCTTGTGGCTGCAGAT TTTAAA CGTCTCC  
GAACACCT TTTC CACAAGGTATGGCAACGTATCC AACAAATTAC ATCC TTTA GGAGT CGGAGCGCCTTCCC  
TACAGTCTACT GGGT ATCGTACTACAGACATCTCCCATAAGGAGGC TTTA GCTATT ATTC GCAACCA  
TTTC CCTAGATTAGCTCGTTGTGA TTTC ACTACTATCGTAG GAAA ATGCATGCAACCACAACAGAGATT  
CTTACA TTTC TTAGACACGCT CAAA CTCCATCC CTGGGTGTCCAGCAGCAGGCT TTTC CGGACACTGC  
ACCC CCCTGCTCCAGCGCTTCTGATGCCTACC TTTC CTCTCGC GAAA CTCTCTTGGGATGTCTCTAT  
TAA TAAA GATTGTCTCCCCTCTATTAG ACTC AACGACACCGTACTAGATATCT ATCC TTCTCTTCCCTCGT  
GAAGA GAAA GACCACCTATCGCAACAAATCC GAGCAGCAAAACAATGCTTCGCAATG TAAAAAACGCAC  
AAGAAA CGTTATTGGCT ATCC TTC GAGT TCTCATCC CCTACCAAGAA GAGT TCCTTCT TAAAAACGCAC  
CTCTCC TAAAGCTT TTTC TG TAAA ACAATAGCTCGGAACTC TCTTTCATGAAGCTACCG CAAA TCGT  
GCCATTGATAA TAAA ACGTTAGCA ACCC CTGTT GGAT TACTCCCTATGCGATCGCTA TTTC CACAAGCGG  
TT GGATCC TGCCCCGATCAATC TAAA GCAACTAT CAAA CATT GGATCC ACCAGT GGA TTTC TACA GAAA  
AC ATCC TCTATCTGATGCAGCTATTAGCCAAAAAT TATTGAGAAGGGC ATCC CCTGCGCAGCAGCACA  
GTAGCCAAATATCGTTGCAACT GAATATCC CCCCTGCGCACCAACGCAACACCTATGCTCTGT TTTAA  
CAACAACACGCACAGA GAATTC TCGACATACTATCTAATCGGAT ATG TAAA GCTGC TTTA CATCC CTTGA  
ACTA GAAATAAA ATG GAAATAAA AAGCCAGAACAAGAGAAGTTGTTCTGGGCTGACAGAAGCTGTCAGA



TCATTTTAATAAGATTGATGACAAC TACAACAAGTTCGTGGATCCAAAAAGAATCTAAAAAGCCATACA  
AAGATTGCGTTACTTCTTGCGATGCC TCTAACACTTTATCAGCGTCATC CAAAAGAAGCATCTCAATGAG  
CGCTTTTCTTCTCTAGCATGCCG CACATCCGCTTCTTCATGTTCTGTGAAATATGCATAGTCTTCAGGA  
TTGGAAAATCCAAAGTACTCAGTCAATCCACGAATTTCTCTCTAGCGATACGTGGAACAAAAC TCTCAT  
AAGAATACAAAGCAGCCACTCCTGCAGCTAAA GAATCTCCTGTACACCACCGCATGAAAGTAGCTACTTT  
CGCTCAAACTGCTTCACTAGGCTCATGAGCCTCTAACTCTTCTGGAGTAACTCTAGAGCAAACACAAC  
TGCTTCCACAAATCAATATGATTA GGGTAACCGTCTCTTCCATCCATCAAGTTATCTAACATAACTTAC  
GCGCCTCTAAATCATCGCAACGACTATGAATCGCAGATAAAATATTTAGGAAAGGC CAAAATATGTAAATA  
ATAGTCCAAAGCATA CGCCTGTAATTGCTCTTTA GTAAGCTCCCCCTTCGACCATTTCCACATAAAACGTG  
TGTTCTAGCATATGCTTATCAAAAATAAT TAAATCTAACTGATCTAAA AAATTCATAAA CACCTCCATCA  
TTTCTTTCTTTGACTC CACGTAACCGCTTGCAAAAAAGGTCCGTATAAGTCCCTGT TTTCCATCTATGCGC  
AAAGAACAATACTCTTCTCGAGAAGTAGGATATGAATGGTAGACCATATTAGGTGCCGTCTATCACCG  
CTAACGGTGCAAACTCATTCCCTCTCCATACAAACAACAGCCGCAACTGCTAAGGCATCTACAAGATT  
ACCAAA CGTCATCTGTAAGGGACGACC GAAACAATCTAGCGATCC TATATAGTTGTGTAATGGAGAAAAT  
CCATACCAACACAGCCCGATACCCAGTACTCCACGCCGATTGGAGTAGTATGGCTATCTGTAATGATTA  
CGCTAGCTCTTTCACTCGAAAATAA TTTCTTAAACCATTCTCCGATGCGATTACAGGATCC CAAAATATC  
TTTAGGATATAAAAACAAAAGGCTGGTCCGATTCGATTCATCAATCCCTGCAGAAGGAATCAAAAATACCT  
TCTTTTTTTCGTTAGATATATCCCGCTTTTCTCACAAAACAAATAAGCATCCGCTTCTTTTTTTTATCAACT  
CTGC CAAACACATTC TTGCATCAGCGACAGCGCCTTCACATAAAACTCACAAATC CAAAAGAGACAAC TAC  
CACACTCCGTTCTTGCAAGGCGGCAAAGCCTCTTGCAAGATCTCTTGAAGC GAATCATGTGCAAATACT  
TTACGTGT CAAAATCGGAGT TATTTCTATAATAATAAA TACTGAAATCC TCTGTATTACAAATACATTC  
TTCTTCCATCC TGATAATCGCGTGATAGGGAAAGAA GTATCGCCCAATATTTCTT CAAAATATGTGTGA  
CAAAAACAGCTTTTCAAGAGGT CAAA TTG GAAAAAAC TTTCAAAGAGCTCCGCTCCCAAT TAAAACGG  
ATGATTC AAAGATAGTGTCCATACTCTGCAAAGGAA GAAACTCTATGCATTGTGGTGGATGCATCCGTG  
CGAGAAAAGACAACGATATCCCGCCATGCTTATACTTGTCTGGAAGAGACTCCCAAGTCTTTTGTCCCA  
TAATGATGGGATGATTTTCAATGGTTTCTGCAAAAAACGTAGATCTTCGGGATAACTCCAAGGGAGCTT  
GCC TAAAGCTCCCATCACTCCTCTGGGATCAATAGCAACGATACCTGTTGCTTGGATCATACAAACATAC  
CAGCCCAAGCAGCAGCGGCTAAGGCAGCTCTGTTACCTTCAACCTGATGCACACGTAGATAATCAACTCC  
TCGATCATGAAGAGATACAGAACAGCCGATCGTTTCCCAATCACGATCGTCACTAT TAAATCGGCCAAC  
ATACTCAACACGATTTTCTAGAATGGCCTATTAATACAGGACTCT TAAAACACGTTTAAACTGCTTTA  
CTCCATCCATCAATAACATCGACTGAACGGGAGTCTTCCCAAATCC TATTCCTGGATCGAAAACAAC TTG  
CCAAC TTGTATCTAAA CTTACTTGAGCAAATTGTTCTAACTGAGACTCTCCCAACGCAACACA CAACTCA  
ATAGGAGATTCTTCATAAGAAA GTACACAATCTGGTCTTGGAGGCAGCGAACAC GAATGATTTA TTAATA  
GCCGTAGCCCAA ACTCTTCGCCAAATGAGCCA TTTCAAAGAGCCTCCA GAAACATCATTGATCC AACG  
AATCG GAAATACTTCAACAGCTCGTC GAATAATCTCTGGAC GAAATGTATCGATAGATACATCAGGGCAT  
TGTTGAGCAGCCCCCACCCTCCGCTAA TAAACGCAAAAACAGGTTCTAGACGCTCCC ACTCTTGTCTA  
CGCTTCC TAAATCTTTTACACGAGGAT TGGTTGCTTGCGCCCTAAA TCAATAATAGAAGCTCCTTCTGC  
AAA GAGTCTCTCAGCATGGGCTGCGGCTCTGCTCGCCTCCA GAAACAATCC TGTATCGGAGATCGAGTTA  
TCCGTAATATTAACAAT ACCCATAA CAAAGGTAGCAGAACC GAAACTGCCTAACGCATCC TCTCTGTCA  
ATGGATAAA TAGCAGCAAGCTCTGCAAACGT TTTCCATTACAAGAAGATCC TCCAACCG GAAACGACG  
ATACGGACATAAA GAAGCCATCATA GAAAGAA TAAAAGGTC TTTCTAATACCTTAGGATGTGGGAT TGTA  
CACAAA TCACTATGATAA GAAAAGCTTCTGCTCCATA GAAAAGCACATCAATATCAATCGGTGAGGCC  
CCCAT TTTAAA GAAGCATCTTGTCCAAAACGAC TTTCTATCATCTTGA TTTCTTCAATCAACTCGTCTGG  
AGATAGCTGCG TTTCCCAATAACTACA GAGT TAAAATAAGGAAGATCCATTC TTTCCGAGCCCTTCT  
AACAAACAAAGCCTTCGTCTC TAAAATCACAGAACTTTTAAATTTCCGGATCC CAGCCTTCTTTAAA CTTG  
CATAAGCGGTCTTATATGCTCATGCCGTTACC TAAA TTGGAACCCAAACT TAAA CAAACAAAATTC CA  
ACTAGTCATGGCACCTCTCTACTTATGCT GAAA CTTACAGGACTGAGTAGATCTGGGATCGGAGGACGCT  
CTTTACTTACTCGCAAGTCAATCC TAGAACTTGTCCAGCCAAAGCCT TTTCTATTT TTTCCAGCAAAC  
CTTAGC TAAACGTTCAAT TAAAGCACAA GGAT TATTC GTTGCAACTTCTTCAATAAGAGAAA CAAGCTCT  
GCATAACACACGCTATCAGAGAC CAAATCCGTGGAACAAGCC CAAAGCTCTTCTTTAAA AAAAAAGAGATA  
AAGAAA CAAGAACGGGCTGCGGAT AATGCCGTTCTTGTCTGAGACTCTATAGATACCCAAACGC GAAA  
ATCCGCTATATC TAAACGATACAACAAC ACTCCTTGTAGGCAGCAAGACTAATT TTTATAACT TTTAATC  
TTACCC GAACCAATTT TTTCTTCTTCCAATAGATCTAGGAACGCTCGCAACTG CAAA GAAC GGATAGGAT

GACGCATC TTTG TAAA GC TTTA GCTTCAA CAAA GC GAATCC GCTCTCGTGTTACATT GAATGCAGA ACC  
CACCTCTTCCAAAGTCTTGGGACGACCATCAAGAAGACCAAACCGAT GAATCAAAAACAAAACGCTCACGG  
TCCGTAAGCGT TTTCAA AACTTC TTTTCAT TTTA TCT TTTAACATG GAATACCC TGTTGCCTCCGCTGGAG  
ATTC AACAGCAGTATCTTCCAA GAAA TCTCCAAAAGAGCTCTCCCACCATCTCCGACCTCTGCCTGCAA  
AGAAA TC GGGT GTTGAGCTAT TTTA TAGA TTTTC TCGAACACGATCTG GAGTAAA GCCCAATTC CTCTCCG  
AGCTCTTCCGGAGT AGGCTC TTTCCCTG TTTTCATCATTAATTT TTTAGCTCCACGAAGCAC TTTATTGA  
TGG TTTTCATCATGTGAACAG GAATGC GGATCGTTCGTGCTTGATCC GCAATAGCCCGTGTAAACAGCCTG  
AC GAATCC ACCACGTGGCATAAGTT GAAA ACTTGT ATCC TCTACGAT ACTCAA ACTTCTCAACAGCCTTC  
ATCAAGCCCATATTACCTTCTT GAATCAGATCCAA GAAA GACAGCCCTCTGTTGGTATATTT TTTTCGCGA  
TG GAAA TTACCAACCGTAAGTT GGATTC GACCATCTCTT CAAA GCTTCCTGGCTCTTGTCATCC AACG  
CTGTAAC ATCCGCACATCTTT TTTAAACTCTTCAA GAGT GCGTCCAGCCGCTACCTCACGCTTGTGAAGC  
TTTC GCCGCGCCGAGCAAG TTTTC GCTGCGGCAA ACTTAT TTTTC TCTCAGCTCGCGC TTTCAAATCATTGA  
CAAA CTGTTCTAACTGCAA GAATGAAT CATAAGCCT TAAAAACCACCTCTCC GAAA TCTTCCGTCACATT  
ATGACGACAATG GAAA CACCGCAAATACGCTTGTGTAC GGATACGGCA TTTTC TCCAGCTCGTC ATTC AAC  
CTTGCC TGATCTGGCTTGGACAACGCC GGATCT TTTAAAGCAAGAAGCCGCTCTTCCAAATATGCATCTT  
CTTC TTTCAATAAA GAGAT GAGCAAA GGCAGAAGATTAAGGAAGTGTGTCTTATCTTCTACTTCTT TTTTC  
AGAAA CGATCTTATCAAATCGTTC TTTACCATTGATGAGATACTGCGCGATCGACACAGCTTCC CAAATA  
GAATAGCGGAAGCGCAAATAAATTC TTTCTA CAAA AACTTGAGCTT TTTTC TATTC TCTTAGAAA TTTCCA  
CCTCTTCTCTCTAGTAAGTAGAGGAACGGTTCCCA TTTCTTTCAAATACATACGAACAGGATCATCTGG  
CGTTCCTT CAGAACGCTTAGCTA ACCCTTCTAGCTCT CAAA CTTCCTTT TTTCTTTCTTTCTGTCGCTCT  
ACATCTGCTTGGTTCAGGACTTGAACATCCATTC CCGCCAGAAA AAT TAAAACTTGATCGATCTGTTCTG  
GCGTATC GAAA GAAGGAGGAAGAAT TTTCAATTGAT TTTCTTATACGTGATGA ACCCTTGATCC TTAGCAAG  
AGT GACTA ACTCTTCTAAC TTTCCAAAGATTTCTTCTTCTTGAGCTGCCTCGGCAGCTTGACTATCTAGC  
GTATCCATGCGCATGCTGACAAAT TAAAACTAAG GAAA AATCGGCC TA GAAA GTGACAG TTTATCTTAAG  
AAA AACA GAAA TCTAGGGAT TTTAGATAAAAAAAGCCTGTTGATCAGAT TTTAGGCCTAGAAA ACCC  
CTCCCGTCT TTTCTACTT ATCCCTAAA TATAG GAAA GA CAAATAAA AAAACTGGCT CAAACAGGGTACAA  
AACCCCTAGTATATGTTGAGCAAAGG ACCCTTATCTAACGTGACTACACAATAATAGAAGGGAGTCGCC  
CCAAAAGCT CAAAT TTTAATAACAAT TTTACCAGAACGTTCTACTCTAGATTC TGT TAAAAGATCCCGCT  
CCCATTGCGCGAATCCCTCAAGAACAACATCGCTCTCTCTG TTTAAA AAATCTTCTAATCCGTATCCCGT  
CCAATCGT TAAA CAAAGCATTGGCAAAGG ACTC CAAACGCAAAGGGAGCAT TAAATAAATAGCATCCCT  
AGAT TTTCTTCTCTCA ACCCATC GAATAATTGCCGACAAGCTAAG GAGTAGTTATGGGCAGAC GGATCTG  
TTCTGTATACCGCAAAGCTGTCAA GAATCC GCCGCTCCGTTGTCTCTACAC GAAA AACAAT TTTACG  
AAA CTC TAATAACAGCTGAGCCACTACATCTCGAGAAGCTACTGGC TTTCTGG TAAA TTC GTCTTAGCC  
CCCA TTTCAATTGCAATAGATTACGTTGCGACATGAGGCTTGTACT CAAA CTCCAAAT TACCAA  
TATAAGCCTGTCTCTT ATCCAGCATGCTATGCTGCTCCACAAAGGTTGCTTGAT ATTCATCATGCAGCTC  
TTGCTGATAAGCAAGCG TTTCCAAA AGCTCCTGAAGCA ATTC TTGAT TTTCTAAA AT TTTCTCATTACGT  
TCACGAACGGCAGCTTCCA ACTGCA CAAA TAATTGCTGGT TTTCTC TTTCAATCTTCGGGACA ACTCCT  
CCATATGGTCGTAACGCC CAAA GCTT GAATAAA GACTTCTCGAGCTTGTCCCAATTGCTCCACCACTT  
ATCATTTGTGCAAT TTTAAA CGATCCG TTTCTT CAAA ACGCT TTTCAATAGTCTCTCGTATATTT TTTAAT  
CC TTCGTCTTGCTCTGTAAG TTTA CGAATC CAAA CTCAAGGAGCTGCCAGCGGGCAGCAAC TGCC  
GCTCTCGCCTCCCAATCGCGAACAACC ACCCTAAA GAAGAAA CAACAGGGAAGA GAAA GGAACCACACCA  
CCATTGCTGCTCGGACAAAAAGGCCA ACTCCTATAGGCAGGA GAATCGCCAAAAC GGGTGGGAGGTAA  
TGAAA GTATCGC GAAA TACAATAATGATTT CAAACAAA GCAGTCTACAT TTTCTCTAGAACTCTTCGCT  
TATTC AAAAAACCCCTTGTACATACTATTGGTCTTCCCATCACATACTGCATGCC TGCACTGCATCC CCA  
AACTATATCCCTACAAATCGC GAATCAAAGGAT TGATCATTGTTT CAAAAAT CAAA GAATATCAACTGT  
TTTGAATCTACTATGATGTTGGCAACTACT GAAA CTTC TTTAAA ATAGGTCTC TTTCCCCCTTCC TTT  
ATTTTATCTATCC TATTT TTTCTTCT TAT TTTA TTGTCT TTTACC TAAA ATCTCCACGTGTTCCGTC  
GGT TACCTGTAAGGCTGAGC GGATGACATCGTTACTGCCGACACTTCTGTT CAAA TGTCGGTCTCTGGA  
GTGACACTTCCAGAGATGACG TAAA G TTTCCGGATACAACATCT ATCC TACTCTCATGTGCATGCC GAAA GT  
CACAGCAGATCGCTGTGAGGTGTGCG CAAA TTC CAAA CGT TAAA GATAACAGT TAAA AATAGCCTAATT  
GGGAGAGATTATGGCACCAAGAAA ACCGAGCAA GAAA GTCGGACCTCAAAAACGCCCTTCTGCAGAGAAG  
AGAGT TATCACTTCTAA GAAA AAGCAATTACGTAATCAAAGCTTCAAATCAAAAAGTAAGAACTATATT GA  
AAAA CAAAAT TGGCAGTGCAATC GGGT GATGTG GAATCCA TTTTC GGCAGGGT TGCCTCCG TTTA CAG

CATCGCAGATAAAAGCTGTAAACACGAGGCATCTTTAAGAAAGGTAAAGCTGATCGAGTTAAATCCCGCGCT  
TCTGAACGCGCTTGCCCCGAGCTTAATTTTTCATTCTTTCTAATTAATCATCTTAGGTCCAAAAG  
CTGATGAACACGCTCACTTTCGTAGGCTTCAAGATCGTTCTTGTCATAAAGATTTTACAAAATCATCGA  
TTTAAAGCGATTTCTTTTACAATGTCTTCCCGATATGCCTCCTCAAAAGTCAAAAACCAAGTTTCA  
CAAGATTTTTACGAAAAGACCTTAATTTTTCAAGAGGTTTCACAATGGCAGCAACGGTACCCATA  
GCAAGCCAGTGGGCAGACTACTATCTTCCGCAACCGCAACTACCAACGAGGGCAACGCAACATCCCTTC  
GCTCAAAGCTCAGCTCTGTAAATGACAAACAAAACCTCATATCCCTCTCCTGCACCTTAGCAAGAGTGAC  
ACCAAGGACCCTGTCTCTGAGACGCAACAACAGCAGCTGTCCACTATAGAGACCACATTGGGCTCAGCT  
AAAAGTGCAAGTAATGCTGTTCAAGCAGGGTGTGGAATGTACAATTACTAACCGGTGGGTATTCTTCA  
AAACGAATCCTGATGGATCTTTCACCTAGATCTTGTTTCGCAACAAGAACCCTCCTGTCTCCACTATC  
ACTTCTCAGCAAAGTAACCTCGTTTAGCCAGCAAAGTTCTAGGAACCGTGAATTCATGGGCTCCCAAAC  
TTCCTGTTTTACCAGTTGGGTGCACACGCAACTGGTATTGGCTTATCTGCTTCTGCGCAAGAACTGTCA  
GCTCCGCCTTCGATGTCGCAAAAACCTCAAGAGAAGTTCTCGGGAACCTCAAAAGAAATAAACCCTACAGA  
AGGAACATCTAAAGAAAACGGCTTCATGGCACGTCTTAAAAGAGCTCGTGCAAGTATGTTCAACTTGC  
AACAGCATCTTGGACTTGCTGGCTCAGGCTTTCGTTCATCAGCGATGCAGTTTCTACAGCATTTATGG  
GAGTGCACACCGCTTTTATTGTGGGTATCTTCTGCTTCCCTATCTGCCAAAGGAAATGTTATTCTTTCAT  
CGCTTTTAAAGGCAACAAACACCACATCCCTTGAAGCTCGCAGGTACATATCTGCGAGCTTTTTTTTAAAT  
TAGAAATAATTTTCGCTGCTAAATGAGACAAAATCCCATTTGAGAATTTGCATAGAGGTAGAAACTAACGT  
CCATTCCTGTTGAATGTTCTGTCACAAAGTCAAAACAAGTTTAAATTGTTGCGCAAGCTCTGTGTTAGATAA  
TCGTGCTGATCCGCAAACTACTAGCGTATGCATCGGCCCAATCCCTCCTGAAAGACTGGCATTATCAAATC  
CGTTTACTGCATACCTTCTAAACTTGCCAATGTCGAAATCCAACTGTAGGTCCAGTTATCTTATAATTT  
ATCCTTGTGCTAATTGTTATCTTTCCTTCAACCTCATAATTAAGACTTCTTAACAGAGAGTCTAAAAC  
GCTAACTGCTCCACGATAATACGAAATAAAGATAAATACAGATTGGCTTGCCTGCGCATGCTGTTGCTT  
GTGCATCCGTTACTTTATGCCCTTGGCGTAAAGCTTCCACTCTAGCTAGTAAAGCTTCTCCAAAACCTC  
GGCGGATAACAGCTATTAATATCCCTAACGATATATTCGTGTTCCCTTAGCTAAAGCCCCATGAACCTCA  
AAGAAATCCCCACAGAAATAAATCTTTTCCTTCCCTGCTTTCACAAAGATAGGAAAGAAAGATTGTAGTAA  
CGGATGAGGTAGAGAAGTTATTAGTAATGGACAGGAGGTGTTAACAGCGTTAGCAGCGACATTGTTGAA  
GTTCACTTCTTGAATCAAAGGATTCAGGAAATTCCTCTGCTTAGGAACAAATGTAATTTAAATGAGATGG  
ATAAAGCAGAACCATAACTCGTAGAGTGCATCCAGCTATCTACAGCCTGTGCACGTAAAGAAGGTGTAC  
TCCCTGTAGAAGTATTAAGAAGCCAAAGCTGGATCTAATGTGTCGTAAGTCTGATTAAGAGTATTGAT  
TTCGATTGAAACGTATTGAGGTATTCTGAAGCTTTCCTTGAATTCGTAAGTAGACCAAAATGCTTCT  
CTAACAGCAACAGTAAGAATTTATTTTTCGTAAATTACGGTGTGACAAAATTACTAAATTAGCTCGGC  
AAACATTGTTGGTACTTGTAAATATAGTTAGTTTAAAGTTTCGTTATCATCAGGCAGCGTAAAGATTCAA  
AACTTCTCTTTTAAAGTTTCGTTCCAATTTATCCAAAACTTTCGAGTACAGTATCTTCCGCTCAGATC  
GTACTAGCCATCGTACATTCAGCCACTTCGCAATAAGCTGCCATGTAAGATATAACGTGGGCTAATGCAA  
ATGCTGTATGGCATTGTTAAGTTTAAATAATTTATCCACATATTGCGTTATAAGACTAATCCCGGCACT  
ATCTAAAACATCAGTTATCTGCGAGAGTGTATAAGCCAGCATAAACACTCCATAACAGATGTCAAGCGT  
ACAGAAGTAAATTTCTGGTTGTCAATTGAGGCGCTTTACCCCTCCAGCATACTCTCTAACGATGCTTGTG  
CTTGTAAAGAGGATGTCTTTTAACTTCTAACTCTTTAACAAACTCTTCTACATTAGAACGTACAGATTG  
GAGATTCGCGTGGCTTGTGAAAGGCCTTAAACCCTCTCCCTTACAGATTCCTGCATCTTGCCTGGTC  
AGATAGTAATCCATCACCTCTGGAGGAGGTAAGGCTGCTTGTGTGTAAATAGTATTGATATCAGTATCAC  
TTAAATAGAAAGATTGCTTCGAAAAGGAATCATTTTCAACACAGAATCAATGACTTCTTTAGATCCACC  
TAAAGCGGGTTCAACCTCCATAGCATTATTGAAAGCTTCCATCCAGCTTGAAGCACTAACCAACGTTA  
GCATCGTTATGTTCTCTTTCGTCAAAGAACTGGAACATCCAGACCATAATTCAAACACTGGTCCAGCA  
TCTCCTGGATATTTCTCCTATGCTTGTCTGATGTTTCACAAAGCTTCCCTTATCATGTGTGTCAAAGTA  
CTCATCAACATAACTTCTCATAATCAGCCAAAGACTTCTCTATGACCTGATCAGAAGCACCTTGAGCT  
GTTAGCTGAGCTGTAACACGATCTTACCTTCTTGAAGCTCTTTCCTTGTTCCTTCTGATAACAGTCT  
TGATAGATTCATCTGAAGGAGCATAAGCACTAGCAAAAACGCTGGCCTGCTCCGTATCATTAAGAATC  
CTTCTGCTGATACGACTCATAAAACATAATTCGACGATACACCAGCTACTTGAATCATAGGTACCTCT  
GGCAGTCTTCTATCAGAGCATTCAAACTATCTGTAATGGTAGTTACTAATACTTTAGCGGTACCAACT  
TAATATCTGCAATAGTACTACCAAGAAATAGTACCTGCTGCCGGAGTGTGCTCCTCTGCGGCTCTTCTTAC  
CCCCAGTCTCCTCCAGGAAATACTCTGTTAGAGGGATTGACCACAGAACCAACTCCAAATATCCAGCT  
TCCAAAGCTACAGTAAACGCTTAGTACATAAAGTCTGAGTTAACTCTCCATATCAATGGCTGGCC

GTGCTTGGTTTTTAAATCCGAGCAAAGGATTGGCGAGTTTAATCTTAAATAAACTCTCCAGATACAGT  
AGTTGGCCTAAAAFTTAAATAGTAAGAAGACATAAAACAAAACATAAAACTTTATGTTTATTTCT  
TATTTAAAAAAGTTTTTTCTATGCAAAATTTTATAAAATTTTATGGTAATCTTTTATAAAAGACAT  
TAGTTGAGATGTGTTCTATGAACATAFTTAATAAAATTAACTCTGTTTCAAAGATTACACAAAAATAGA  
AGAAATATTTCTTCTACGCATAAGAAATAAACTTCTGCATGAATCAAGTAATGCAGTTTCAAAAACA  
GAAATAGAGCGTAGTGCTATTCAGAAATGTTTATCTCTTTTGAATTTAGATAATGATGTGAAAGGAAAT  
ACGAACAGTTAGTTGCTTCCCTATCTTCTAGCGCTCCAACGACCAGTCTCAGCCTCAGATGAATCAGC  
TGTAATCACATACGATCCACCCCTTCTAATCCCTGTATAACGCTTCAAAAAGCCTGGGTACACAAT  
GTATTGGTTGGCTTCTCTGTGCTTAAACGAAGCTAAAACAAAAGCTACGGAAATCGCTGGGCAACAA  
ATCCCTCCACAAACAGACCTTAAGCCTCTGACAGACAAACAAAATTCGTAACTACTCTAGTAGATAAGGC  
TAATCACAGAGAATCTAACGAAGACTTAGAGACATTTTATCTCTTCCCTGACCAGATCTTTCTGCT  
ATTCAAACTTTCCGTTTCAAGGAAATCAAAAAGTACTCTTTCTAATCAATTATTTGGATTCCTAAAGCG  
AAGATGCTTCTATAGAACAAGTTCAAACAGACATACGAATTGAAGGACTTCAAGGATACTCTGAATATGGT  
CCAATCACGACTGTCTGCCACAGAATTCGAATCCFTTAAAGAATTACAGATGATCATAGATACTCTCCGT  
GAGTATGTTGAACCTTTTAATGACGAAGGACAAAATACCATTTTACAGACGAGTAAAGATCTGTCTTCCG  
CTATCATCAATTCCTCTCTCCAGCAACGATAAGATAGAACTCTGCCGTAATATGCCGACCCTTACAG  
AGACCAAGTGTTATCTATCAAAAACCTTAGATAACGTATTGAATGAGACCATTTATAAAGCGCTCGCAAC  
AGCTCTCTGTTCTCAAACAACAAACAGTCTCGTTGAATTCATCATGGGGAGGTTTCTCCTATCGGACTAA  
ATGAGACTACTATAGAGGTAACGAACGCATCAATTGCTGGAGCCCTGCAAGCAGTGCAGCCATTGACAC  
TCGTTTCCATGAACATACTCTGAACAAGAAAATCTCGTCAATGAAACGGTCAAAGAACTTGATGACTTC  
TCAGGAGGTAACCTACATCGGTGCCGCAAAGGCTTACTTTACGCTGCAACAGTCATCTCCTCTAAAGACT  
CTGTGACAACAGATGAAGTCAAACAAGCGTTAACCTCGCAAGCTAATACTATCGTCTCGGATTTTCTCT  
AGCCCAAACGTTAAAAATCTACGATTAAATAAAATGTACAAGAAAACGGGGAATTTAAAGCTAAGTTGAT  
GGTATAGAGAGACAATATACTATTTTCCGCCCCGCTTAAAACGATACAAGTTCTAACAAAGCCACTCTTA  
ACCCAAATCCCTTCTTAACCAAAGATCTATAGGATTCCTGCCAACATTACCAAAGCAGCAAATAACCATGC  
AGAAACTTCTGCTAGAGCCTTTTAAATTTAGAGCTCTAGCGCAAGTAGAAAATACAAAACCTAGATGGA  
ACTTTTACAAGGAAGTGAGAACTTCTTACAGAAAATAAAATCAATTACGAAAAGACCTGTTTTCTACCAAC  
TCCTTGACAAATCCCTATGAAATTCGCTCTCTCCCTTCTCTTCTGAGTTGCTTCGGTCTTATAGATCG  
CTACATGCCTCAAGAGATTGATTACTTAAACACAGATGAAATCGGATCTGTATTACAGTAACCTTCGGCTCT  
AGTGTGGAATGCTATGATTGAAGCTATTGCTCAATTCGTGAATGGAGCTACCTACTTCAATCAAACGA  
GCCAAATTTGGACAACAACCTATGACAGCTATGGCTCAGGATACCTTCTCTGGCTCTAAAGAGACAGCTGA  
AGCAAAACTCGCTTTTAGAAAACAACAAGCTAAACTCTACCTGCAATATGCTACTCAAGCTCTAAAGGTA  
GTCCAAGAACAGATGGAACGAGTCCAAAACGATAAGGTTATCACTAACGAACAGAGATTACGCATCACAG  
ATGCFTTAAAAAGGATACGCAGACAACCTCAACGCCATTAGCGGTTCTTTAGTCTTATTACAGGTGTACCT  
GAATCCCTCAGCGTGGGAGTTCGTAATGGCAACCAGAGGCAACGATACAGGAACAAACCCCTAAAGGA  
ACTTTCCACGTGTTTACAGAGGAAAGATCAGTGGCAAGCAGCTTTAGAAATTCCTAGAAGATGCTCTGTCT  
CAGGACTTCTTCTAATATCATCAGCGGAGGACTGTCCCTTACAAGCAAGTGTGCAATCTGACCAACA  
AGCCTATGCGGATATGGGGCAGAATACCAACTGAAATGCAAAATGCATATGACGGCCATGCAGCAAAGAA  
TGGACGGTAGTAGCCACATCTTTTCAAATTCCTAACCAATCTATCTTGGTTTAAACAAACTGGCTA  
GTTAGACAAATAAAAGCAGCTTAAAATTTCAAATTTTAAAGCTGCTTTCCCTCACGATTATTACTGAAGCT  
ATCTTAAGAGATTACGCGTAATCCCAAATAAACAAAATTTAATAGCTGAAGAGATGTTGCTACCACCAT  
CCACTCTGTTGCATAGAAGTGAGATGCACAAAACACTCTAACTGAAAATTCCTGTCCCATATCAGCATAG  
GCCTGCTGATTCGAGTGTACCAGAGCTTGCAAAAAGAACATTCCTAATATTAGTTGGGCTACCGACTTCTC  
CGGATACCACAGTATCCCTTAAAGTCTGTAAAACATACTCCAGTTCTTTCCGTTTCTCCTGGTTTACC  
ATTFTTAACTCAAAAACACCATCCACACCTTCAACAGTACTCACTGATAAAAGGGCCAATTGAGTTTCT  
AATGATGTAAAAGAAATGTTGATTGCGTTAAGCATATCGGTATACTGTGTCAACTCTGCATTAATTTCAA  
CTTTCTGCTCTGTAGATAACTTGTATCATCAGTAACCGCACAAAATGATTAGTGACGGTAGTCTTAGC  
TGCCTTCTGTAATTTCTAGAAAACACATCTACTTGTCTTCTTCTGCTAACTTGGCTTTTATGCATTATCT  
GCAGACCCCTGCAAAAATATTCCTCCCTGTTTTAACTTACAACAGGAGGTTGCCCAATATAGTTAGCAAAC  
CAAAGTAGGTTGCGGAGTTTACATACAACTAATCGCATCTAAAATGGTGTGCTTATATCCGAACCCTT  
ATTTCTCGTAATACAGACGAGACGAGATCTTTTCTAAAACCTCCACTTCCCAAAGCATGTAGTGGTCAATC  
AATACAGAAGCAACGGCAGAAGGGAGCGGAGAAGCCTTACTTCTTAGCAAATGCAATAGTTTCTCCAG  
CATTCAACTCTGTCTGCATCTTGGTCAAAGATAGACTCTTCTGTCTCCCTTGAACCATACGCAAATGAAT

CATATTC TTCTCT GAAT CAGCTTGC GAATGAAT CGATCGC ACTC TTGCT TAAA TACCTCTGCTTGA GAA  
AGCGCTACTGCTAACATCGTTCCCTAGCAC TTTAT GAAATCC ATCGCCTAGAGCGATCTCATCACATAACCG  
CTTCTCCT GAAT CATTATAG GAAA ATA ACTC GTATCG ATCC CCG CAAA CTAATGTGACAAAGCCTTG TAA  
AGAACAACCTGCAAAATGTCTTGCAT CAAA GCCGTCAAACAAAGTTATT ACTC AAACCACTTAACG TT  
TCT GAAA AGC TTTT TTT TAAA CCTTCTAAGAGACCTG TTTCTTTA TTC TGGCAATTAACAACAACCAAT  
GCGCACAGAGA ACTC TAAAAATTC GTCTAACTGCTGTTGTTGCAACGATGATACCGCAGC ATTC ACCAC  
AAA CTGCTGCTCAGCTGT TAAA AAGTCAAACG TAAA CCTATTGCACGCACAGTGGGAAGAACACTTACC  
ATCATGGCA GGGT TCAG TAAA ATACGCTCCTCTTCACTAGTAGGAGACAAT GAGT GCATAAGAGAG GATA  
C TAAAGAAA TCACCTGCACGAAGTAACCATGTTGCCTA GAATTC ACAATAGAGCATCTTGTTTCGAGACT  
ATGATACGCTTGTACCGC ATCC ACTTGTCTTGGTACATAGCTGCT ATTC GTTGACAGAG ATCC ACCTTC  
TGACTTGCCTTCAGCTCAG ACTC CACGATCTTAGCA GAAA GAT ACC ACCGACTC GAGCAATCGCCTCTA  
TATGTTCTGGACTGAGATGAG ATTC ACTC GTGCGTTGTATAGAG GAAATTTT TCCGAGACTTCTTG GAA  
TACCC GAA ACTC TTCTTCTGTCAAACGCTC TTTA ATCACAGA TAAA ATCGCTTGGAAAGTTCTCCAATCGT  
ACCTGGGCGAAGGACTGCTC TAAA TTC TCTTCCGTACCAAAAATATCTATCAAAGATT GGAT CAATTC TA  
GCTGCCGCGTGCTAGATACAGAAGC TTTCTGCAAAA ACTCGCATAACATC ATTC GAAA GAGAAA GAAGAGA  
AC GAAT ATCTTCCGCAGACAAACGCTCTTGCTTGTCTGTAGGGAAGCGGCATCC ATACGGATAGCAAGT  
AAA TCTCCCCGTTCTTCTTCCG TAAA CAAGGAT GTGTCCACTAA GAGTTGATCC AAAA TTTT AC GAATAC  
CC TGCACTAATCGTACTGCCAAC CAAATTTA ATGCCTG TAAA AATAGGCATGCTAGAAT CAGACTGAAC  
TACAGCTTGTGCAACAACCTGAT TTTT CAGATTGCAGGGAAGCCATCGGTT TTTT TTGGATGTGTGGGCTC  
TCTATAGAGCGTCTG CAAA TCTATCTAC ATCC AACTGTTCCAGTCGTT GAAT CAAA TTTT GATATCGCT  
GGTCTGCTT CAAA ATCGAAG GAAA CAAGAAGAGCT TTTAAA GCTTCTTGTTCAT CAAA AACTGCTCATA  
TTGAGCAACCTGAGATACTATTGTTGCA GAGT CTGG CAAA GCAATCTTC CAAA CAATAGCCTCAAG GAGTG  
CTATTATA ATCC GT TAAA GATCC TTGTGTACGAT GAATACGGTTCATTGCCAACTCTCTCAACTCTACAG  
TTGTACTTGTGCGGAACCT ATCC CAATAATATTTTT TTTA CAAC TTTT TCCAGAA GAATAAAA AAAGCAT  
AT TTTT TTCT CAAA GAACTAAGAACTTATTATT GAAA AGACTTCTGTAGACACGAG ATTC CAAAAAAG  
AAA AAAGAGCCAAAAA GAAATTC TTT CAAAGCTCCCCCTCAATTC ACAAACTTCAATCACACGTTAAGA  
AA GATAACCAGAGAAT AGAGAAGCAATG TTTA CCAACACCTGTT GAAT GAAA GCGGGCTGT TTTCTAAAC  
GC ATTC TCTTGAG ATTC TGCAGACTACGTTCCCATCAACAAACTCTCT TTTT CAATTGTGCAGCAA  
TCTGCAAGCT ATCC ACAGAATTC TGAACAGCAGGATACCC AAATGTGGAGC CAAA CTAATAGATGCCGT  
GAGCTTCTGCATAATCTCTTCTTGA CAAA CTGCGGAT TGCTCACAATCGTAGACATCAAAGAATCCAGA  
ACCTGTAAGCGCTATATAACATCACCTAACG CAAA GCTATCTCTGACAATAG TTTT TGCTGCTC CAAAGC  
TAGCATCTGCACTGCGTCCTTGAC TTTT ATGCCAGAACGA GAAA CGTTCTG GAAA GCGCGGACAAA  
AG CAAA ACTAATAGCTGACTGCACGCCGCTTCTGC TTTT CCGAATA TAAA GAGT TCAGTGT CAAA TAAGCA  
GAATATCC ATCG GAAA GTGCTGCTGCATAAGAGCTGGAAGAAGTCGAA GAAA ACGCTGTCTTG TAAA GCT  
GT TTTA ATTC ATCTGGACAGTGCCAGCTGTTCTGCGGAGCCTCTCCAACCTTGGCAGCTGCAAAAGC  
CACTGTCCCATAGCTGTAGC TAAA CCATCTGCTGATGGTTG TTTT AAAGCTTGC GCAAGAGCATC CAAA  
ATTGCTTGTAT TTTT GGCTGGGAGCTCGCC ATCC GCACCAACAGTTGATCTGACATCGCAGTCAGCTGAG  
CCTCCATAGCTTGTAGCTC TTTA GCTGTTGCA GGAT TG TTTA CAT TAAA TTGTTGATCATAGATC GAAA  
ACCTTGCAATTGCAATCGCTGCCA TTTT ATTGTCTACATCATCAAGCAACAAG GAAA TTC TTCTTCT GAAT TG  
TTAGAGGAT TTTT AACGCTCCTGCCCACTTCTGCGGAAGCAGCTG ACCACTC GGACCAACGATAG GAA  
TATCC AAACCACTAGGTGTGATCG CAAA AATATCTTGTGTGCTTGATTAATCTGCTCCTCAGCTTT TTT  
CAC TAAA GCGGAGT CCGCTAT TTTT TTGATGTTCTTGC TTTA ACTC G TTTA CCTTCGT TTTA GCAGCATCA  
ATTAAT TTTT TTCGTGGCTGCGATATTATCTGGGCTATTAC CAAA CCGTGCTTGAAGAACTGCAGCCTGGC  
CAAAA ATCCCAGC ATCC ACAATAGACTGCAAAGCTTGTCCTAAC TTA ATTC CCGCTTCAGAAA ATTC CAA  
AATAACCT TTTT CACATCTGTAAGAACAGC TTTA TAATTAGAGA CAAATTC TTTA AGCTCTTTAATAACA  
AAGTGTGCAGA ATTC TTGTTGATCTCTAACCGACTATTAATCGCAG GAATCTGATCC GCAGAGT CCGTTG  
T TTTT AACGCTTCTGT TAAA GAT TTTA TTTCTGAT CAAA CAGCGTAAC GAG TTTA TTC AGCTTATCAATAGT  
ATCTT CAAA TGCTTCGAGCGC TTTT TTAATATTA TTTA ATTC TTCGGTATGATCGTTACTAGGAT CT GAA  
TTAGCCTCCATATCTTGGAGAGCTGCCATCAAATCAGCCAT TTTT G TTTT GATTC AGCAAGTGTCTTAG  
CGTTCCTA ATCC ACT TTTT GCCGTATCAAATTC GA TTTA GCCTTATCATAATCT CAAA CCGCTACACG  
TGTAACCGTAGAGGTAGAAGTAGAGGCCTCTAATTGAGAGAGA GAGT CTGTTGGACTG GAAT TTTA TTC  
AAGATGGCATCACGAAGAGAGATTAATGC ATTC CAAA CTGAGGA TAAA AA ACTC CAGCTGCTTACAGAGG  
ACGATGCTGAAGAA ACTC GCTTCGGACGCCTTCGTGG ACTC CAAA G TTTT CCGAAT TAGAAGCGA CAAA CCC

ATTAATAATTGGATTCATCGAGCTCTGATTAGAA GAAACTGATTC TGGTCCTGATTC CATAACAATA TAAA  
AAAA TAAA AAAACCTTACT TAAA TTA TAAAAGGCAA TAAAAAAGCCAC ACCCGTTAT CAAA GGTGTGG  
GCTCT TAAAAGACT ATCCCTTAAG GGATTAGAAT GAA GAAAT TAAA CCTAGGTCATACTTACGATAGGTG  
AAGTCGCTACCAAGGTTATCGTTAGCAGGCTTAGAAT AAGCAGCATAGGCTCG GAAAGAACT GAATCTG  
TCAG ACCCATAACGAAC TATAG GAAACTCC TTTA TAGTTAG TAAA GCCGTTAGATTC TTTAGGATCCAA  
TCC TTG CAAAATAGCTTGAGCAAACCAATA TTTCA CAAAG TTTCCGCGACCAAT ACCCGCAACATCAA TT  
TC TG GAATCGC TAAA GCTTCAACAT ACTCATAACGAAC TGTTCAGACCAGTCTCCAGCTCGTCGAACAC  
CGCTAGAGAGCAGCCGATGAACCAAGCATGGT TTTCC TTTACCATTCC GTAATT CAAA TTGCAG GAGT TGT  
TGTGATTG TTTCC CAGTTCTCTGGTA TTTCCGCTAAT GGAT TAAA GAGATAGGCTCCGTAAGTG TAAA GA  
TTT CAAACAAA TCCAT TAAA ACCATGGCATAGCTGTGCTCTTCCCAACCAACCATTGCCATAC TAAA TAAT  
CGTACTTGGTATTAGG TTTAGCTGGTGTGTCAGTGTGCTTGCCTGCT GGAT CATTCC GTT CAAA CTGTTAA  
CGTATTC CAGTCAATAAC ACTCGT TTTCCACAAC GAAATTTCC CTGGAAG TTTATTTAAA ATAGCTTCCACG  
ACCC AAGCATACTC TTTCC TCTGCCAT ATTCACGACAAAAGGACC ACCATGAACAATCATAGT GAAA GGAA  
G TTTCC TACTAATACGTGCGCAGCGTA TAAA T GAATTC CGTC GAAA TTACTAT TAAA CTGAACGTCCGA  
AT CAAAAATATCTCCCAATCC AGAGCGACCAATCTCTGCAATACTTCTGCCTGCG TTTCTGGGT CAAA  
TAGAAT CGGTATCC TAAGAAGGCACGATTAATATCTA ACCC TGCTGCAGAAGATTCC TCCGCCAGCAATCG  
TT ACCCAATTCAT TTTCC GAAGTC ATCC AACTATTAGCAGCGGTGTAATCC ACATACAAATT GAATTC ACT  
ACGATAACGATTGATAGG TAAA ATAGG TTTAGTAG GAGTCT GAGT TGTCTCAAGATCC TCT CAAA CATAA  
ATCC ATCGAGCGCGGACATCTCCAGC TAAA CG TAAA GCTCCATCGCGCTTAC GAG TTTCTACAAA ACCCT  
TGGAACTCAAATAA GAATC TAAA TCTTCAACAGACCATAGCTGGCT ATCCATCGAACTAGCCTGCGCAAA  
AGCCAAG CAAA TAGACCACAAGCTAA TAAA AGCGCGCCTACAAA ACCCTTTATAAAA AGTATTT TTTCCATA  
ATGTCC TTAGCAAAG CAAA ACATCTCATAACAACCG ACCCATGG CAAA TATTTTA TTATCGAGAAGTGCTC  
ACG GAAA TCTCTCTTCCCTGGGACGCTTGATTTTT TTTCCGCAACCGTTACAAATCTCTTACTTACATAAGC  
ATGATCGTAACCAAGCCAAAAACTATAGCTCAGGAAGGATTTTT TTTAAA AATACAGTTCTATTCTTTGGA  
AGAAA AAGATGTCTAAGAGACTAGCTTACAGCTAG TTTCTTAGGATAGACTGATGCC TTTCC CAGTATT  
GGAAA GAAGTAAG ATTCCACAAGATCTTCTGTCT TTTAGTAATTTA GCTAATCCAAACAATACCGATAA GAA  
AAGTGCCGATTC TGCAAAAAG ACTCCACACTGATC TAAAAAAGACAC TAAA GGT CAAA TTGGGACTGTT  
AATGGCTCGA TAAA CACTACGTACGTGGTATGCGTTACTATGTTACACCAATCGTAATAACCGCTGCTA  
GAATGTTGTAATGACAGT TTTCCACTCTC TTTAAA TGTCTCCACATCAATCC CAAA TAAGTAGGAAG  
ACTC TTACCAGCACAATACCATAGCATCGCTAACTG ACCCCACGACGC TAAA GAAGTGGCGTAGGC TAAA  
ACAGCAACCTG CAAA CAAAC TAAA CATCCGATCACATTAAGAACCAT ATTC ACTACGGCAGCAATGATCC  
CTACTAGCATCGGAAC CAAA TAATTC TTTCTTGCATA GAATAGAGCCGATACGAGAGGAGC TAAA GCCAT  
AG GGAT AATACTTCCACTATACCC TCTTAGA ACTTCTACAATAGCGTGCACAGCTGTTGTAG GAAA CACT  
CCGTGCTCATATAAC ACTCCGTACCC CAGGCAAAGCAAAAAGCAATAGCCCCATCGTTATAACCACCATAA  
CAGCAACAGTGAGCTTCAAC GAAA ACCGCAGGAGATCAT ATCC TTGTTGATGTTCTTGATCTTGAACACA  
ACGA GAAA TCGCAGGTAGCAACACTGTGAAG ACTCC AAGACCAAAA TAAA TGACAGGTA ACTGCTGT ATT  
CGCAG GAATACATCAGATACAGAGGTCCTACCTCATTGATATATCGCGGAGCCACATATCACATAGTA  
AGTTCAACT GAAA GATTC CAT GGAT AACAATCC TAGAGACAGTGGGGCAATAAGAGCACGGAT ACTATC  
CCGCTCCTGAGGAACCTC TTTAC CAAA TCCCAAAAAC TTTATGACTC CAGGAAGCGTAATAGCCC ATTC T  
AAA ATGAAGCCTACGACAAGGACTACAGCTAATCC AAAAATACGA TTTCTC GGAT CATAATTC CGTGCTA  
AAA AAGACCGTTCCAATCC ACAACACATTAACAACAGAAGGAGCAAGTCTACGCT GAAA AACTT TTTCTC  
ACAATGCAACAGCGTGAATTC ACTGTATACATCATCA GAAA GATCC CGGAAGGTAGCAATATGATTGTT  
AAA AATAGGGTATCAAATAGGCTTCCGTGAACGCAAGAACACCAACACAGAGT CCTAATTC TATAATTA  
AAG TAAA TAATATAGCGCTGTAACAAA GAATCTC GAAAAGCT TTTAAAGAAA AACGTTGCTCGA GAAAT  
AT CAAA CGCACG TAAA ACTCGAAA TGCGGAAT TAAA AGC GAGT CCAAG AATAGGCCACC TAAA AGCTTT  
CT TAAA AAAAAGATCGTCC GAAA AGCCAGCCAAAAGATGCTACTAAG GGATCGGCTCC GAAA TATGTAG  
CCATAACAA TTTCC TCGTAACATCC CAGTAAGACGAC TAAAAAACGTTCCGGACAGCAAT TAAA CAATGA  
GCGCACTAGCGATCC TTCATCATC TTTCC TCTCAT ACTC TCCTCTT TTTATGTCT TTTAAGCCTT TTTAGG  
CCC TTTA TACC GAAT AACGGCTAGTGATATT TTTCC TGATAATGCAATAACTACCAT ATTC TCGCTATT  
ATAG TTTCTTTA ATCAAGAACCTCTGGCAATCTTCTATCAT GAAT GACTAGATAGAGAACGGGCTATG TT  
TA TACTTCTCTCTCAAGAGCC TTTA CTAGGAGCCACACGCTGCTGCTGGAGGACTTCATAATGCT  
CT TTTA CGAAGGGCGCGATATCGGAGCAACCACCGTTCAGCT ATTC ACTGCAAAATCAACGTGAGTGAAGC  
GACGCGCACTA ACTCAA GAAATGGT GGATCAGTTCCGCATAGCAC TAAAT GAAA CTCTCTATCTTACAT

CATGAGTCATGCTGGTTATTTAAATAACCC TGGAGCTCCTAATCCGGAGATTC TAGAAAAAACTCGAGTG  
TGTATGCACCAAGAAATAGCGGACTGCATCTCTCTCGGCATTTCTCAAATCAACTTTCATCCGGGAGCGG  
CTCTTTCTGATTC TAAAGAAAGTTGCCTCGATCGTGCTATCACGAGTTTTTACAAATGGCCCCCTTCA  
AAAAACCATCC TCCACTTGTGTCTTCTTGAACAACCCGAGGCCAGGGTCCCTAATAGGAAGTTCT  
CAAAAGGAACTTGCTTACCTAATTC AAGGGAT TAAAGCCCTCATACCCATAGGTG CAAATCTAGATACCT  
GCCATATT CAAACCGCTGGTTACGATA TTTTCATCGGTGCGGGATGGGAGCAAGTACTCAAACATCAAAA  
CGCAGTGATTGGAT TATCTTT TTTACGAGCCATTC ACT TAAACGATTC TGTC CAAACTCTCGGAAA AAAC  
AAAGATCGTCATGCCCTATTGGAGAAGGTTGCATAGGCTCAGACAGTT CAAACTTCCTTATGCAAGATG  
AGCGTACCCGCATGCTACC TAAATACCTAGAGACTC CTGGAGGACCAGATCTGTGGAC TAAAGAAATCCG  
TTACCTACAAAAG CAAATCAAAGTCAACAGAAGGAGTT TTTCTCCTCTCTCTTTATGAAAAAAAAGCCT  
CGCAAAGCGAGGCTTCAAAGAACATA TAAATCC TTGAACCAAATGATTATGTTCTGTGGATAGAAACT  
CACAAATAACAGAAA CGTTTACTGG TAAAGGAAGTTGAGAAGCGA CAAATCCAGTTCTGGAGCAACAAC  
CAACTCTCC TTTAAAAGCTGC TTTATCCAAAGATAGATAGGCAGGAAGAGAGC CAAATC CAAATCTCT  
AAAGATTC TGTAACGATAGCTAATCTT CAAAATT TTTCTTTT AAAGAGATCTGCATTC CAGGACGAACGA  
AGAACGAGCGTCTATCCACCTT TTTCCGTTACCAATACGTGCCCATGAGAACTAACTGTTGAGCAGC  
AAAGATCGTT CAAACGAATCC TAGTCTATAGACGATGCTGTCCAAACGGC ACTCAA TTTCTCTAGGAAC  
ACAAACGCAACGTTCTTGCTTA TTTACGACCTC TTTATAAGCCTTAACTAATTGCTTCTCTAAGATCA  
TTCCGTAGCAAGCT TTTAATT CAAACTTTTCTTAACTGTAAGCCGTAGTCAGA TTTCTTT TTTCCAAA  
CATGCCGTGCTG ACCCGGAGGAT TGGGC TTTCTCAGCAAAGGG TTTGACCTCTCCAAAGATGTTAGCT  
CCAAAACGTCTCGCTATTC TGTT TTTAGGGCCACAATATCTCGCCATGTTT CAGTCTTAT TTTATTCCTT  
AAA AAACATCGCTCGCTAATT TTTATTGGGAGACGTTGTTGAACGC GAGT TCCCGCGCTTGACAAAAT  
ACAAAAGAGCATTC TAGTCTAT TTTCCAAT TTTCTACAACGGATTTCTAGATTC CAGTGC TAAAAAA  
CTCTTCTTAT TTTAAA AAATCTCAAAAAGGTCGA TTTAACTAGCTG CAAATTTAGAAA GATACT GAAAA  
GGTTCTTT TTTATTTCTTCATCAAAACTCCAAAATCTATTC TTACCATCTCGTATACTGCCTCTCAGCCA  
TTTAAA AAAGTT TTTAAA CAAACT TTTGAGCTTCTCGAT TTTAATCTTAAAGATAAGT TTTGAGCATATA  
GGATGTCTTCATG GAAA GAAT TATTATGCTTTA GCGTATTACTAC CAAAGTCCCGTAAGCAACCC TTAT  
GAAGAAA TTGCTTTA CACAAGCAATT ATTCAAAAC TATGGATG TTTCTTGCCGGATTTACATCTCTGAAG  
AAGGGATTAACGGTCAG TTTAGCGGCTATCAGCCAGACGCAGAACGCTATATGGCTTGGCT GAAA CAACG  
CCCAGAT CAAACCTCGAT TAAATTC CAAATCC ACCATATTGAAGA GAATATCTTCCCTAGAGT TACAGTG  
AAGTATCG TAAAGAACTCGTTGCT TTTAGGATGCTCTGTGATACAACAAAACAAG GAAAACACAT TTTCC  
CTGAAGAGTGGCAT GAAAAACTC CAAGAGAATCGTTGCTTAGTCTTAGATGTTG AAA TAACTACGAGTG  
GAAA ATCGGT CATCAAAAAATGCTGTTCTCCCTGATATT GAAA CGTTCCGAGAA TTTCTGATTACGCT  
GATCGTCTAGCCAAAGAGCATG ATCC TGCAAAA ACTC CTGT CATGATGTATTGCACTGGAGGT ATTC GTT  
GTGA ACTCTACTCGCTCTTCT TTTAGAGAAA GGC TTTAAA GAAGTGTACCAACT GGATGGAGGCGTGAT  
CGCCTATGGAT TAAA AATGGGAACAG GAAAATGGAGAGG TAAACTC CAAAT TTTGATGACC GGATGGCT  
ATGCCTATCGATGAAGC GGATCC TAACGTGTCTCTATTTGCTCGTTGCTCTC CAAA CAACACAGATTCAG  
ATACCTACTACAATTGTGCAAACACAGACTGTAACAACCTC TTTACAAA CTGTGAGTCTTGTATCGCTAC  
CCA TAAAGGAT GTTGTTCAGAA GAATGCTCTCAAGCTCCTCGTATTC GAGC TTTCTCTGCAGAGAGAGGA  
AACAAACC TTTCCGTAGAAAACACC CAAATCCAACAATTGAACAGAGCTGTTGCC TAAAAGAACAAGAAA  
ACCAACCAGCATAAA AAAAGAGACGCCACGTTCTGTGGGCTCCTCTTCCAAAGTCTTCTGCAGCCAGG  
TTAGCATAAAAGTA TTTATTTCCATCCACAAAACACATT CAAA CACAACATCTCTAGCGGCTCCGAACA  
CTCTAATCCCTCTCTCTGCAATAGGTGGAGATT TTTAATACAGGATTC AAAAGAATGGTCTAGCAACTCT  
CAAA CTGCCACCTCTCC GAATAATAACGCATAGTTCATATG TTTCTCTTCTGATCATCTTGACTAAGAT  
CGGCAAGATCATCGCGTA CAAAGAAA AGTAACCC AAAATGTTCCGCAA ATTCAGCTAC TAAA GTGGAGCT  
TTCCGTTCTCTCTCTCCAAACAACC ATCC TGATACGCAAGCAA TTTCAAAAAGAGCTCCTGT TTTCTTT  
TTAATAATCCCTAATACGTTCTC CAAAGAGAAA TCATGAAAAAATACATCTTCATATTGTCTCTCC TAAA  
TTCTCCTACGCCAAAACGCAACTC AATCAGCTCCAAAATATCTTCGTAAGCCTCTTCCACATCTTGTT  
ACAA GAACTACAGCT TTTAGCGCT CAAACATTC TTAC GAATTC GTGCATAAGCAGCTG GAATAAGAGCA  
TACGAAGCCAGGAGAGCCGAAGCTTCATCAAAAAGC CAAATGAACCGAAGGCTTGCCCTACGCATATCAT  
CATCGTCCATACACGGCAAGTCATCGGCTATTAACGTAGATGTATGGATATACTC AATAGCAATGGCGGT  
ATCC AAGACATCTCGCTC TTTATGGATACCTTCCGCAA TAAA CCAACAAGCAAGGGACGAACCGG TTTCT  
CCCCCTCC TAAA AGGGCATACTCTATTGGGTCTCTTAATCCACCC T GAGTGT TACC GAAATCTCCAAAG  
AATCGCGAAGCTTTT TTTCTAC TTTCTGATCGA TAAACGCTGAAA TAATCCATATCC AAGCAACTGCCTTC

TTTTCATCAACC CAAACAAA ACAAAGGTTG TTTCTTAG TAAA TGG CAAAATTAGGAAGAAT CCAAA  
AGCACTGGCTACATAAC ATCCTGGAT TAAGTACGGTATTAC ACCCAACACTT ACTC CTCTACCTAG GAAA  
GCTCCTAACTT TTTCCGT CAAA TATCATAACGCTCTCCAGAAT GATGGAA GAAA ATGGT CAAA CCATCTA  
ATC TAAA G CAAA CACAACGA ACTC CTGCCCTAG ATTC ACTC TGGAACCAAAAACA GAATCTCTACATA  
AGCAAAGTGAGCAGC TTTCCGCGTATGCC TAAA TAGCTGTT TTTA ATCTCAGAACAGTGTCTATAACG  
CAATGTGAGCTAGTTATTACACCGCTC GAATATATGCACCATGACGCACTTGCGTATAGGGACCGATAA  
TACAAGGACCACAAA TATAAGCCCCAG ATTC TACGTAAGCTCCTTCTT GGA TTTG ATAGTCTC TTTA TT  
T TTTA GATAC ACCC CTCTTCAAGATGCCCAT GGATTC CT GAAA AAGTATGAGAAGCTAG TTTCTCTCT  
AACAAAGTCAAAATAGACCAACAAA ATTCAGCTTGGCTTACGATCTCT GGA TAAA GAAA ACTC TTCTGGTG  
AAA ATAAGGAGGCTGA TAAA ACCATAACTAAGCTCCTGATACAAGCATAGCTAGGTA TTTAAA CACCCCC  
TG GGGT TTTA GAAA GC CAAA TATCTTGTGAG GAAT TTTT TCTCCATCATCT GAAA ATAGAT ACCC  
AACACCTCGTAAGGTGACA ATTC TACTTCCATAAGCTCCTAACTT TTTCT TAAA GAAGCTATGTGTACG  
TCTAC ATTC CTGCTACAATCGC CAAA GCATG ATTC TTAAT TTTCTTCAAGAAGATGT TTTCTG TAAA CAAA  
GTTGTCC CAAA TTAATAAGAAGTCG TTTCAAAATACCAG ACTC CGATGGTGT TAAA TGAAC ACTC CCTTC  
TG GAG TTTCTACTGTGAGCTTCAATACA TAAA ATACATTAGGCCAAAACGAATAC TTTCTCGGAACAGAA  
TG TAGC GAAT GCTGA GAAAGAAA CAAGCTGATTGC GGATTTTAAA ATTCTAGGAGT AATAGGCC GAATTA  
AA TACC AAAA ACCCAG ATCC AAAAGATCAACACTAG TTTCTTCATCAAAAAATC TAAA AGAAC TAAAAC  
AAA ACTACCTTC TAAA GAT CAAA GAGAAC GAAT CTCTCTTGGAA GCAAT GAATATTC GCAGACAACCAAG  
TCTGCGGACAGTCTTG TTTA TATTGCTGCCAATAGTGCACCGAT ACTCTTCAGGATTAAGCAATTCTC  
AAACAAAAAAA TAAA TCC CAATGTTCACTTACTAGTAACACATG TTTAGGCCCCGCCATA TAAATAAA  
CCC ATTGA ACTATTAGATTACCTAATAACA AAAAATAGTTT TTTCAAGAGCCTCAGAAAAAAAACG  
ATATCTTCAGACTTTT TTTCAAG TTTAGACTACACTTGTCTGTGA TAAA CAGCTC ATTCCTCTGC TTTAT  
CTAGTT CAAAATC GAAAAACAAA AGA GAAAAT GAAA ACGTTAATTGATAACAACATCGTCAG ATTC AAAA  
ATATTTCTAAA ACCAAACAGGGTAT TTTCTGTTAAT TTTCAAGT TAAA GGAGAGAGAGGGGGGCTTCCTT  
TA CAGCTTCTATAGCCGTTGATATCGATGCAGCTGATG TTTCTGCAGGAG ATTC TTTAGAAA CCATTATA  
GAACGCTGTGCTCTTATTGGT ATTC GGGAATTTCAAAAATGC GAG TTTCTAG CAAA AAG GAATTA CAAATT  
TA TAACAGG TTTCT CAAA ACTTATATTCGTTGTA TTTAAA TAGCTTGAC CAAAAA GTTTTACTG TAAA  
ACTGTGGTCCGTTAAT ACCCCTTA TTTCTAT TTTCTGGATGTAGCGCAGCCTGGTAGCGCACTTGCATGG  
GGT GCAAGGGGGCGGAGGTTCAAATCCTCTC ATCCAGAAC TTTCTTTAAGACTT TTTA CCGGATTC TTGT  
TGTAATCTTCTAGTTCAGTCTCT GAGTAGTCGACAAACTTCAAGAACAGCTCGTAAGCTGGAT GAAACT  
GAAT AACCTCTCTAGCCATATCTATAGCAAT TTTA CGATAGC TTTCTATGCCCTGTGGTTGAGAGCGTAA  
CTC ACAAAGCCACTGCAAACCTCTAGCGTTGATATG GAAAAGCCATC GAATATTGTAAGCT TAAA GGAACC  
ACATATTGTGCTTCTCTGGGA ACTC TTCTGCTATTAGACGATACGCTTGATCAGCTT TTTCTCATAGCTC  
CTCTGAAGGGAGCTTCCATAG GAGTGTGATCAATTGTGAAGGCATCGTGTA ACCCAAT CAAA TCGTCAA  
AAGCTGTC TTTCTT GAGT TAGGATACGATGTC CAAATAAATCC CGATAGGCTCCAAA ATCC GCTGTAATA  
TCAAAGCAA ACTC AGCAC ATTC CAATCCGCGAGGGGACAAA TGCCGCCG ATTC TCTCG GAAA GAAGCTC  
CCG ACTC TAAGATACGCATGAGATCTTATTAG GAATATTGCGACAAATATCTAACAGCTCTGCATAAGT  
GTGTCC GAGT AGGGGAACATGTAGGCTGCAGCAAT CAAA TATA ACCCGTCT GGAT CTCCGTATACTAAT  
TTTA CACCAGCCTC TTTCTGAAATTTCTCTCTCTTCCCGTAACGATGTGCAAAACTT TTTAATTGTTCTT  
TTAAA GCCCGACGGTAATCC ACCATAGCTTGGTGATGATAATGATGAG ACTCTGCGCGGCTTACAAAAGA  
GGGAAT TAT TTTCTATTAATTC TGTTAAGGACTGCTCTCCAATATTGCGTACCTCAACCAA ACTATTGTCT  
TGCAAACGGTGTAGCAAGTCTGCCAAAACCGGCCATTACCAAAAAACCTAAA CAAAT GAGT GTCGCTG  
CAGGTAACAAACCTCG TAAA CAGTCTAATAC TTTA GCTCG TAAA GAAA CTGTATACGCTGATTGA GAAAC  
TTCT GGATCT TTTAGGGTATAG TTTCTC GAAA TGGGAACGAACCTGAG GGAT AAGATCG GAGTATGTGTTG  
AATAG GAAATCACAAGTATCC AAAAAGACGTC TTTAAA GGCCGAGGTCATCAAAAATAGGGTCTCGGTAAT  
ATAAA TACTCCCGTTA ACTT CAAA ATC GAAATAAA CGTATCTAGACGATT TTTCTAGGGGGG ACCCTCC  
AATCC GAGCATCTTC TAAA ATT CAAA CTGCGAGCAT GGATACTTGTTCAGAGCAAGATGCGCTCCTCCC  
AACTCTCCAACAGAA TATCACCAAAGTTGTC TAAA ACGCGACGATAGAAGTCCACAGCTT CAAA GATTC  
CCA ACTC ACAATCTTGTGGT CATCATCAAG GAAA TTACCGCCTTCCCATC TAAA AATTC TTTCTAAAAG  
AAGCGTTGCA ACCC CAGAGT CGATCTG GAATAT CAAAAAA TAAA GCGCC TTTA ACCACTTCTGGAAGG  
TT TTTCTAAAGCAAATATAGGC GAGTCT TAAATTC GTCACAAAATGCGA TAAA CCGCTC CAAA CTCTCAG  
AAA ACC ACCCTC CAAA CTCAACATAA GAAA ACTC CTA TAAA GCAGATTAGCTTACCACACATAACAAA  
CACTCAAAGTT TTTCTAGCAAAAAGCTTGTG TAAA AACTTGTGACCACCTG TTTA CAAATAGGCATAACT



TCAA TTATAAA CAA TTTAAA CAAGCTGTGAACAAAGTTATGAACATTATTTTCACAGCTT TTCTCTCG  
AAA CAACAATGTTA TAAACAA TTTCAC ATCC TAAA GAAGAA GAAACTAATAAA TATCTCTAC GAATC  
TTCTTCTAGGGGGT GAAAC TTTCGATAAGTGTACAAC TTT
